# Supplementary material for: An iPSC-based model of 47,XYY Jacobs syndrome reveals a DNA methylation-independent transcriptional dysregulation shared with male X aneuploid cells
Source: Genome Res. 2025 Jul;35(7):1503–17. doi: 10.1101/gr.279716.124 (PMC12212075; doi:10.1101/gr.279716.124)
Supplement: Supplement 2 [file Supplemental_Data_S1_R3.xlsx]

## Sheet: KS-19126
Supplemental Data S1
Chromosome	Type	Cytoband Start	CN State	Size (kbp)
X	Gain	p22.33	3	2111
Y	Gain	p11.2	2	18642
File: KS-19126_1_KSR-10138.rhchp
CN State: 3.00
Type: Gain
Chromosome: X
Cytoband Start: p22.33
Cytoband End: p22.33
Size (kbp): 2,111
Marker Count: 535
Gene Count: 19
Genes: CRLF2, CSF2RA, MIR3690, IL3RA, SLC25A6, LINC00106, ASMTL-AS1, ASMTL, P2RY8, AKAP17A, ASMT, DHRSX, ZBED1, MIR6089, CD99P1, LINC00102, CD99, XG, XGY2
OMIM ® Genes Count: 20
OMIM ® Genes: CRLF2 (300357), CRLF2 (400023), CSF2RA (306250), CSF2RA (425000), IL3RA (308385), IL3RA (430000), SLC25A6 (300151), SLC25A6 (403000), ASMTL (300162), ASMTL (400011), P2RY8 (300525), AKAP17A (312095), AKAP17A (465000), ASMT (300015), ASMT (402500), DHRSX (301034), ZBED1 (300178), CD99 (313470), CD99 (450000), XG (300879)
Microarray Nomenclature: arr[GRCh38] Xp22.33 or Yp11.2(664,059_2,774,669 or 664,059_2,774,669)x3
File: KS-19126_1_KSR-10138.rhchp
CN State: 2.00
Type: Gain
Chromosome: Y
Cytoband Start: p11.2
Cytoband End: q11.223
Size (kbp): 18,642
Marker Count: 3,908
Gene Count: 80
Genes: SRY, RPS4Y1, ZFY, ZFY-AS1, LINC00278, TGIF2LY, MIR9985, PCDH11Y, TTTY23, TTTY23B, TSPY2, FAM197Y9, LINC00280, TTTY1, TTTY1B, TTTY2, TTTY2B, TTTY21, TTTY21B, TTTY7, TTTY7B, TTTY8, TTTY8B, AMELY, TBL1Y, PRKY, TTTY16, TTTY12, LINC00279, TTTY18, TTTY19, TTTY11, RBMY1A3P, TTTY20, TSPY1, TSPY10, TSPY3, TSPY4, TSPY8, FAM197Y4, FAM197Y5, FAM197Y7, FAM197Y8, FAM197Y2, FAM197Y6, FAM197Y3, RBMY3AP, T…
OMIM ® Genes Count: 22
OMIM ® Genes: SRY (480000), RPS4Y1 (470000), ZFY (490000), TGIF2LY (400025), PCDH11Y (400022), AMELY (410000), TBL1Y (400033), PRKY (400008), TSPY1 (480100), USP9Y (400005), DDX3Y (400010), UTY (400009), TMSB4Y (400017), VCY (400012), NLGN4Y (400028), XKRY (400015), CDY2A (400018), HSFY1 (400029), TXLNGY (400031), KDM5D (426000), EIF1AY (400014), RPS4Y2 (400030)
Microarray Nomenclature: arr[GRCh38] Yp11.2q11.223(2,782,116_21,424,105)x2

## Sheet: KS-19127
Supplemental Data S1
Chromosome	Type	Cytoband Start	CN State	Size (kbp)
11	Gain	q13.5	3	1218
X	Gain	p22.33	3	2035
Y	Gain	p11.2	2	19068
File: KS-19127_1_KSR-10138.rhchp
CN State: 3.00
Type: Gain
Chromosome: 11
Cytoband Start: q13.5
Cytoband End: q14.1
Size (kbp): 1,218
Marker Count: 449
Gene Count: 16
Genes: EMSY, LRRC32, GUCY2EP, TSKU, LOC101928837, ACER3, B3GNT6, CAPN5, OMP, MYO7A, GDPD4, PAK1, LOC646029, AQP11, CLNS1A, RSF1
OMIM ® Genes Count: 12
OMIM ® Genes: EMSY (608574), LRRC32 (137207), TSKU (608015), ACER3 (617036), B3GNT6 (615315), CAPN5 (602537), OMP (164340), MYO7A (276903), PAK1 (602590), AQP11 (609914), CLNS1A (602158), RSF1 (608522)
Microarray Nomenclature: arr[GRCh38] 11q13.5q14.1(76,517,497_77,735,006)x3
File: KS-19127_1_KSR-10138.rhchp
CN State: 3.00
Type: Gain
Chromosome: X
Cytoband Start: p22.33
Cytoband End: p22.33
Size (kbp): 2,035
Marker Count: 518
Gene Count: 19
Genes: CRLF2, CSF2RA, MIR3690, IL3RA, SLC25A6, LINC00106, ASMTL-AS1, ASMTL, P2RY8, AKAP17A, ASMT, DHRSX, ZBED1, MIR6089, CD99P1, LINC00102, CD99, XG, XGY2
OMIM ® Genes Count: 20
OMIM ® Genes: CRLF2 (300357), CRLF2 (400023), CSF2RA (306250), CSF2RA (425000), IL3RA (308385), IL3RA (430000), SLC25A6 (300151), SLC25A6 (403000), ASMTL (300162), ASMTL (400011), P2RY8 (300525), AKAP17A (312095), AKAP17A (465000), ASMT (300015), ASMT (402500), DHRSX (301034), ZBED1 (300178), CD99 (313470), CD99 (450000), XG (300879)
Microarray Nomenclature: arr[GRCh38] Xp22.33 or Yp11.2(739,183_2,774,669 or 739,183_2,774,669)x3
File: KS-19127_1_KSR-10138.rhchp
CN State: 2.00
Type: Gain
Chromosome: Y
Cytoband Start: p11.2
Cytoband End: q11.223
Size (kbp): 19,068
Marker Count: 3,992
Gene Count: 85
Genes: SRY, RPS4Y1, ZFY, ZFY-AS1, LINC00278, TGIF2LY, MIR9985, PCDH11Y, TTTY23, TTTY23B, TSPY2, FAM197Y9, LINC00280, TTTY1, TTTY1B, TTTY2, TTTY2B, TTTY21, TTTY21B, TTTY7, TTTY7B, TTTY8, TTTY8B, AMELY, TBL1Y, PRKY, TTTY16, TTTY12, LINC00279, TTTY18, TTTY19, TTTY11, RBMY1A3P, TTTY20, TSPY1, TSPY10, TSPY3, TSPY4, TSPY8, FAM197Y4, FAM197Y5, FAM197Y7, FAM197Y8, FAM197Y2, FAM197Y6, FAM197Y3, RBMY3AP, T…
OMIM ® Genes Count: 22
OMIM ® Genes: SRY (480000), RPS4Y1 (470000), ZFY (490000), TGIF2LY (400025), PCDH11Y (400022), AMELY (410000), TBL1Y (400033), PRKY (400008), TSPY1 (480100), USP9Y (400005), DDX3Y (400010), UTY (400009), TMSB4Y (400017), VCY (400012), NLGN4Y (400028), XKRY (400015), CDY2A (400018), HSFY1 (400029), TXLNGY (400031), KDM5D (426000), EIF1AY (400014), RPS4Y2 (400030)
Microarray Nomenclature: arr[GRCh38] Yp11.2q11.223(2,782,116_21,850,504)x2

## Sheet: KS-19128
Supplemental Data S1
Chromosome	Type	Cytoband Start	CN State	Size (kbp)
X	Gain	p22.33	3	1504
Y	Gain	p11.2	2	18604
File: KS-19128_1_KSR-10138.rhchp
CN State: 3.00
Type: Gain
Chromosome: X
Cytoband Start: p22.33
Cytoband End: p22.33
Size (kbp): 1,504
Marker Count: 394
Gene Count: 18
Genes: CSF2RA, MIR3690, IL3RA, SLC25A6, LINC00106, ASMTL-AS1, ASMTL, P2RY8, AKAP17A, ASMT, DHRSX, ZBED1, MIR6089, CD99P1, LINC00102, CD99, XG, XGY2
OMIM ® Genes Count: 18
OMIM ® Genes: CSF2RA (306250), CSF2RA (425000), IL3RA (308385), IL3RA (430000), SLC25A6 (300151), SLC25A6 (403000), ASMTL (300162), ASMTL (400011), P2RY8 (300525), AKAP17A (312095), AKAP17A (465000), ASMT (300015), ASMT (402500), DHRSX (301034), ZBED1 (300178), CD99 (313470), CD99 (450000), XG (300879)
Microarray Nomenclature: arr[GRCh38] Xp22.33 or Yp11.2(1,270,685_2,774,669 or 1,270,685_2,774,669)x3
File: KS-19128_1_KSR-10138.rhchp
CN State: 2.00
Type: Gain
Chromosome: Y
Cytoband Start: p11.2
Cytoband End: q11.223
Size (kbp): 18,604
Marker Count: 3,898
Gene Count: 79
Genes: SRY, RPS4Y1, ZFY, ZFY-AS1, LINC00278, TGIF2LY, MIR9985, PCDH11Y, TTTY23, TTTY23B, TSPY2, FAM197Y9, LINC00280, TTTY1, TTTY1B, TTTY2, TTTY2B, TTTY21, TTTY21B, TTTY7, TTTY7B, TTTY8, TTTY8B, AMELY, TBL1Y, PRKY, TTTY16, TTTY12, LINC00279, TTTY18, TTTY19, TTTY11, RBMY1A3P, TTTY20, TSPY1, TSPY10, TSPY3, TSPY4, TSPY8, FAM197Y4, FAM197Y5, FAM197Y7, FAM197Y8, FAM197Y2, FAM197Y6, FAM197Y3, RBMY3AP, T…
OMIM ® Genes Count: 22
OMIM ® Genes: SRY (480000), RPS4Y1 (470000), ZFY (490000), TGIF2LY (400025), PCDH11Y (400022), AMELY (410000), TBL1Y (400033), PRKY (400008), TSPY1 (480100), USP9Y (400005), DDX3Y (400010), UTY (400009), TMSB4Y (400017), VCY (400012), NLGN4Y (400028), XKRY (400015), CDY2A (400018), HSFY1 (400029), TXLNGY (400031), KDM5D (426000), EIF1AY (400014), RPS4Y2 (400030)
Microarray Nomenclature: arr[GRCh38] Yp11.2q11.223(2,782,116_21,386,395)x2

## Sheet: KS-19129
Supplemental Data S1
Chromosome	Type	Cytoband Start	CN State	Size (kbp)
X	Gain	p22.33	3	2111
Y	Gain	p11.2	2	23624
File: KS-19129_1_KSR-10138.rhchp
CN State: 3.00
Type: Gain
Chromosome: X
Cytoband Start: p22.33
Cytoband End: p22.33
Size (kbp): 2,111
Marker Count: 535
Gene Count: 19
Genes: CRLF2, CSF2RA, MIR3690, IL3RA, SLC25A6, LINC00106, ASMTL-AS1, ASMTL, P2RY8, AKAP17A, ASMT, DHRSX, ZBED1, MIR6089, CD99P1, LINC00102, CD99, XG, XGY2
OMIM ® Genes Count: 20
OMIM ® Genes: CRLF2 (300357), CRLF2 (400023), CSF2RA (306250), CSF2RA (425000), IL3RA (308385), IL3RA (430000), SLC25A6 (300151), SLC25A6 (403000), ASMTL (300162), ASMTL (400011), P2RY8 (300525), AKAP17A (312095), AKAP17A (465000), ASMT (300015), ASMT (402500), DHRSX (301034), ZBED1 (300178), CD99 (313470), CD99 (450000), XG (300879)
Microarray Nomenclature: arr[GRCh38] Xp22.33 or Yp11.2(664,059_2,774,669 or 664,059_2,774,669)x3
File: KS-19129_1_KSR-10138.rhchp
CN State: 2.00
Type: Gain
Chromosome: Y
Cytoband Start: p11.2
Cytoband End: q11.23
Size (kbp): 23,624
Marker Count: 4,508
Gene Count: 115
Genes: SRY, RPS4Y1, ZFY, ZFY-AS1, LINC00278, TGIF2LY, MIR9985, PCDH11Y, TTTY23, TTTY23B, TSPY2, FAM197Y9, LINC00280, TTTY1, TTTY1B, TTTY2, TTTY2B, TTTY21, TTTY21B, TTTY7, TTTY7B, TTTY8, TTTY8B, AMELY, TBL1Y, PRKY, TTTY16, TTTY12, LINC00279, TTTY18, TTTY19, TTTY11, RBMY1A3P, TTTY20, TSPY1, TSPY10, TSPY3, TSPY4, TSPY8, FAM197Y4, FAM197Y5, FAM197Y7, FAM197Y8, FAM197Y2, FAM197Y6, FAM197Y3, RBMY3AP, T…
OMIM ® Genes Count: 38
OMIM ® Genes: SRY (480000), RPS4Y1 (470000), ZFY (490000), TGIF2LY (400025), PCDH11Y (400022), AMELY (410000), TBL1Y (400033), PRKY (400008), TSPY1 (480100), USP9Y (400005), DDX3Y (400010), UTY (400009), TMSB4Y (400017), VCY (400012), NLGN4Y (400028), XKRY (400015), CDY2A (400018), HSFY1 (400029), TXLNGY (400031), KDM5D (426000), EIF1AY (400014), RPS4Y2 (400030), RBMY1A1 (400006), PRY (400019), P…
Microarray Nomenclature: arr[GRCh38] Yp11.2q11.23(2,782,116_26,406,426)x2

## Sheet: KS-19130
Supplemental Data S1
Chromosome	Type	Cytoband Start	CN State	Size (kbp)
X	Gain	p22.33	3	1513
Y	Gain	p11.2	2	23615
File: KS-19130_1_KSR-10138.rhchp
CN State: 3.00
Type: Gain
Chromosome: X
Cytoband Start: p22.33
Cytoband End: p22.33
Size (kbp): 1,513
Marker Count: 401
Gene Count: 18
Genes: CSF2RA, MIR3690, IL3RA, SLC25A6, LINC00106, ASMTL-AS1, ASMTL, P2RY8, AKAP17A, ASMT, DHRSX, ZBED1, MIR6089, CD99P1, LINC00102, CD99, XG, XGY2
OMIM ® Genes Count: 18
OMIM ® Genes: CSF2RA (306250), CSF2RA (425000), IL3RA (308385), IL3RA (430000), SLC25A6 (300151), SLC25A6 (403000), ASMTL (300162), ASMTL (400011), P2RY8 (300525), AKAP17A (312095), AKAP17A (465000), ASMT (300015), ASMT (402500), DHRSX (301034), ZBED1 (300178), CD99 (313470), CD99 (450000), XG (300879)
Microarray Nomenclature: arr[GRCh38] Xp22.33 or Yp11.2(1,261,400_2,774,669 or 1,261,400_2,774,669)x3
File: KS-19130_1_KSR-10138.rhchp
CN State: 2.00
Type: Gain
Chromosome: Y
Cytoband Start: p11.2
Cytoband End: q11.23
Size (kbp): 23,615
Marker Count: 4,502
Gene Count: 115
Genes: SRY, RPS4Y1, ZFY, ZFY-AS1, LINC00278, TGIF2LY, MIR9985, PCDH11Y, TTTY23, TTTY23B, TSPY2, FAM197Y9, LINC00280, TTTY1, TTTY1B, TTTY2, TTTY2B, TTTY21, TTTY21B, TTTY7, TTTY7B, TTTY8, TTTY8B, AMELY, TBL1Y, PRKY, TTTY16, TTTY12, LINC00279, TTTY18, TTTY19, TTTY11, RBMY1A3P, TTTY20, TSPY1, TSPY10, TSPY3, TSPY4, TSPY8, FAM197Y4, FAM197Y5, FAM197Y7, FAM197Y8, FAM197Y2, FAM197Y6, FAM197Y3, RBMY3AP, T…
OMIM ® Genes Count: 38
OMIM ® Genes: SRY (480000), RPS4Y1 (470000), ZFY (490000), TGIF2LY (400025), PCDH11Y (400022), AMELY (410000), TBL1Y (400033), PRKY (400008), TSPY1 (480100), USP9Y (400005), DDX3Y (400010), UTY (400009), TMSB4Y (400017), VCY (400012), NLGN4Y (400028), XKRY (400015), CDY2A (400018), HSFY1 (400029), TXLNGY (400031), KDM5D (426000), EIF1AY (400014), RPS4Y2 (400030), RBMY1A1 (400006), PRY (400019), P…
Microarray Nomenclature: arr[GRCh38] Yp11.2q11.23(2,782,116_26,397,464)x2

## Sheet: KS-19131
Supplemental Data S1
Chromosome	Type	Cytoband Start	CN State	Size (kbp)
6	Gain	q25.1	3	1998
X	Gain	p22.33	3	2525
Y	Gain	p11.2	2	23646
File: KS-19131_1_KSR-10138.rhchp
CN State: 3.00
Type: Gain
Chromosome: 6
Cytoband Start: q25.1
Cytoband End: q25.2
Size (kbp): 1,998
Marker Count: 1,654
Gene Count: 12
Genes: PLEKHG1, MTHFD1L, MIR12131, LOC102723831, AKAP12, ZBTB2, RMND1, ARMT1, CCDC170, ESR1, SYNE1, SYNE1-AS1
OMIM ® Genes Count: 7
OMIM ® Genes: MTHFD1L (611427), AKAP12 (604698), ZBTB2 (616595), RMND1 (614917), ARMT1 (616332), ESR1 (133430), SYNE1 (608441)
Microarray Nomenclature: arr[GRCh38] 6q25.1q25.2(150,632,806_152,630,948)x3
File: KS-19131_1_KSR-10138.rhchp
CN State: 3.00
Type: Gain
Chromosome: X
Cytoband Start: p22.33
Cytoband End: p22.33
Size (kbp): 2,525
Marker Count: 688
Gene Count: 24
Genes: PLCXD1, GTPBP6, LINC00685, PPP2R3B, SHOX, CRLF2, CSF2RA, MIR3690, IL3RA, SLC25A6, LINC00106, ASMTL-AS1, ASMTL, P2RY8, AKAP17A, ASMT, DHRSX, ZBED1, MIR6089, CD99P1, LINC00102, CD99, XG, XGY2
OMIM ® Genes Count: 25
OMIM ® Genes: PLCXD1 (300974), GTPBP6 (300124), PPP2R3B (300339), SHOX (312865), SHOX (400020), CRLF2 (300357), CRLF2 (400023), CSF2RA (306250), CSF2RA (425000), IL3RA (308385), IL3RA (430000), SLC25A6 (300151), SLC25A6 (403000), ASMTL (300162), ASMTL (400011), P2RY8 (300525), AKAP17A (312095), AKAP17A (465000), ASMT (300015), ASMT (402500), DHRSX (301034), ZBED1 (300178), CD99 (313470), CD99 (45…
Microarray Nomenclature: arr[GRCh38] Xp22.33 or Yp11.32p11.2(249,587_2,774,669 or 249,587_2,774,669)x3
File: KS-19131_1_KSR-10138.rhchp
CN State: 2.00
Type: Gain
Chromosome: Y
Cytoband Start: p11.2
Cytoband End: q11.23
Size (kbp): 23,646
Marker Count: 4,559
Gene Count: 115
Genes: SRY, RPS4Y1, ZFY, ZFY-AS1, LINC00278, TGIF2LY, MIR9985, PCDH11Y, TTTY23, TTTY23B, TSPY2, FAM197Y9, LINC00280, TTTY1, TTTY1B, TTTY2, TTTY2B, TTTY21, TTTY21B, TTTY7, TTTY7B, TTTY8, TTTY8B, AMELY, TBL1Y, PRKY, TTTY16, TTTY12, LINC00279, TTTY18, TTTY19, TTTY11, RBMY1A3P, TTTY20, TSPY1, TSPY10, TSPY3, TSPY4, TSPY8, FAM197Y4, FAM197Y5, FAM197Y7, FAM197Y8, FAM197Y2, FAM197Y6, FAM197Y3, RBMY3AP, T…
OMIM ® Genes Count: 38
OMIM ® Genes: SRY (480000), RPS4Y1 (470000), ZFY (490000), TGIF2LY (400025), PCDH11Y (400022), AMELY (410000), TBL1Y (400033), PRKY (400008), TSPY1 (480100), USP9Y (400005), DDX3Y (400010), UTY (400009), TMSB4Y (400017), VCY (400012), NLGN4Y (400028), XKRY (400015), CDY2A (400018), HSFY1 (400029), TXLNGY (400031), KDM5D (426000), EIF1AY (400014), RPS4Y2 (400030), RBMY1A1 (400006), PRY (400019), P…
Microarray Nomenclature: arr[GRCh38] Yp11.2q11.23(2,782,116_26,428,271)x2

## Sheet: KS-19132
Supplemental Data S1
Chromosome	Type	Cytoband Start	CN State	Size (kbp)
X	Gain	p22.33	3	1643
Y	Gain	p11.2	2	21481
File: KS-19132_1_KSR-10138.rhchp
CN State: 3.00
Type: Gain
Chromosome: X
Cytoband Start: p22.33
Cytoband End: p22.33
Size (kbp): 1,643
Marker Count: 431
Gene Count: 19
Genes: CRLF2, CSF2RA, MIR3690, IL3RA, SLC25A6, LINC00106, ASMTL-AS1, ASMTL, P2RY8, AKAP17A, ASMT, DHRSX, ZBED1, MIR6089, CD99P1, LINC00102, CD99, XG, XGY2
OMIM ® Genes Count: 20
OMIM ® Genes: CRLF2 (300357), CRLF2 (400023), CSF2RA (306250), CSF2RA (425000), IL3RA (308385), IL3RA (430000), SLC25A6 (300151), SLC25A6 (403000), ASMTL (300162), ASMTL (400011), P2RY8 (300525), AKAP17A (312095), AKAP17A (465000), ASMT (300015), ASMT (402500), DHRSX (301034), ZBED1 (300178), CD99 (313470), CD99 (450000), XG (300879)
Microarray Nomenclature: arr[GRCh38] Xp22.33 or Yp11.2(1,131,189_2,774,669 or 1,131,189_2,774,669)x3
File: KS-19132_1_KSR-10138.rhchp
CN State: 2.00
Type: Gain
Chromosome: Y
Cytoband Start: p11.2
Cytoband End: q11.23
Size (kbp): 21,481
Marker Count: 4,306
Gene Count: 115
Genes: SRY, RPS4Y1, ZFY, ZFY-AS1, LINC00278, TGIF2LY, MIR9985, PCDH11Y, TTTY23, TTTY23B, TSPY2, FAM197Y9, LINC00280, TTTY1, TTTY1B, TTTY2, TTTY2B, TTTY21, TTTY21B, TTTY7, TTTY7B, TTTY8, TTTY8B, AMELY, TBL1Y, PRKY, TTTY16, TTTY12, LINC00279, TTTY18, TTTY19, TTTY11, RBMY1A3P, TTTY20, TSPY1, TSPY10, TSPY3, TSPY4, TSPY8, FAM197Y4, FAM197Y5, FAM197Y7, FAM197Y8, FAM197Y2, FAM197Y6, FAM197Y3, RBMY3AP, T…
OMIM ® Genes Count: 33
OMIM ® Genes: SRY (480000), RPS4Y1 (470000), ZFY (490000), TGIF2LY (400025), PCDH11Y (400022), AMELY (410000), TBL1Y (400033), PRKY (400008), TSPY1 (480100), USP9Y (400005), DDX3Y (400010), UTY (400009), TMSB4Y (400017), VCY (400012), NLGN4Y (400028), XKRY (400015), CDY2A (400018), HSFY1 (400029), TXLNGY (400031), KDM5D (426000), EIF1AY (400014), RPS4Y2 (400030), RBMY1A1 (400006), PRY (400019), P…
Microarray Nomenclature: arr[GRCh38] Yp11.2q11.23(2,782,116_24,263,099)x2

## Sheet: KS-19133
Supplemental Data S1
Chromosome	Type	Cytoband Start	CN State	Size (kbp)
X	Gain	p22.33	3	1812
Y	Gain	p11.2	2	19068
File: KS-19133_1_KSR-10138.rhchp
CN State: 3.00
Type: Gain
Chromosome: X
Cytoband Start: p22.33
Cytoband End: p22.33
Size (kbp): 1,812
Marker Count: 465
Gene Count: 19
Genes: CRLF2, CSF2RA, MIR3690, IL3RA, SLC25A6, LINC00106, ASMTL-AS1, ASMTL, P2RY8, AKAP17A, ASMT, DHRSX, ZBED1, MIR6089, CD99P1, LINC00102, CD99, XG, XGY2
OMIM ® Genes Count: 20
OMIM ® Genes: CRLF2 (300357), CRLF2 (400023), CSF2RA (306250), CSF2RA (425000), IL3RA (308385), IL3RA (430000), SLC25A6 (300151), SLC25A6 (403000), ASMTL (300162), ASMTL (400011), P2RY8 (300525), AKAP17A (312095), AKAP17A (465000), ASMT (300015), ASMT (402500), DHRSX (301034), ZBED1 (300178), CD99 (313470), CD99 (450000), XG (300879)
Microarray Nomenclature: arr[GRCh38] Xp22.33 or Yp11.2(962,491_2,774,669 or 962,491_2,774,669)x3
File: KS-19133_1_KSR-10138.rhchp
CN State: 2.00
Type: Gain
Chromosome: Y
Cytoband Start: p11.2
Cytoband End: q11.223
Size (kbp): 19,068
Marker Count: 3,992
Gene Count: 85
Genes: SRY, RPS4Y1, ZFY, ZFY-AS1, LINC00278, TGIF2LY, MIR9985, PCDH11Y, TTTY23, TTTY23B, TSPY2, FAM197Y9, LINC00280, TTTY1, TTTY1B, TTTY2, TTTY2B, TTTY21, TTTY21B, TTTY7, TTTY7B, TTTY8, TTTY8B, AMELY, TBL1Y, PRKY, TTTY16, TTTY12, LINC00279, TTTY18, TTTY19, TTTY11, RBMY1A3P, TTTY20, TSPY1, TSPY10, TSPY3, TSPY4, TSPY8, FAM197Y4, FAM197Y5, FAM197Y7, FAM197Y8, FAM197Y2, FAM197Y6, FAM197Y3, RBMY3AP, T…
OMIM ® Genes Count: 22
OMIM ® Genes: SRY (480000), RPS4Y1 (470000), ZFY (490000), TGIF2LY (400025), PCDH11Y (400022), AMELY (410000), TBL1Y (400033), PRKY (400008), TSPY1 (480100), USP9Y (400005), DDX3Y (400010), UTY (400009), TMSB4Y (400017), VCY (400012), NLGN4Y (400028), XKRY (400015), CDY2A (400018), HSFY1 (400029), TXLNGY (400031), KDM5D (426000), EIF1AY (400014), RPS4Y2 (400030)
Microarray Nomenclature: arr[GRCh38] Yp11.2q11.223(2,782,116_21,850,504)x2

## Sheet: KS-19134
Supplemental Data S1
Chromosome	Type	Cytoband Start	CN State	Size (kbp)
X	Gain	p22.33	3	1643
Y	Gain	p11.2	2	21481
File: KS-19134_1_KSR-10138.rhchp
CN State: 3.00
Type: Gain
Chromosome: X
Cytoband Start: p22.33
Cytoband End: p22.33
Size (kbp): 1,643
Marker Count: 431
Gene Count: 19
Genes: CRLF2, CSF2RA, MIR3690, IL3RA, SLC25A6, LINC00106, ASMTL-AS1, ASMTL, P2RY8, AKAP17A, ASMT, DHRSX, ZBED1, MIR6089, CD99P1, LINC00102, CD99, XG, XGY2
OMIM ® Genes Count: 20
OMIM ® Genes: CRLF2 (300357), CRLF2 (400023), CSF2RA (306250), CSF2RA (425000), IL3RA (308385), IL3RA (430000), SLC25A6 (300151), SLC25A6 (403000), ASMTL (300162), ASMTL (400011), P2RY8 (300525), AKAP17A (312095), AKAP17A (465000), ASMT (300015), ASMT (402500), DHRSX (301034), ZBED1 (300178), CD99 (313470), CD99 (450000), XG (300879)
Microarray Nomenclature: arr[GRCh38] Xp22.33 or Yp11.2(1,131,189_2,774,669 or 1,131,189_2,774,669)x3
File: KS-19134_1_KSR-10138.rhchp
CN State: 2.00
Type: Gain
Chromosome: Y
Cytoband Start: p11.2
Cytoband End: q11.23
Size (kbp): 21,481
Marker Count: 4,306
Gene Count: 115
Genes: SRY, RPS4Y1, ZFY, ZFY-AS1, LINC00278, TGIF2LY, MIR9985, PCDH11Y, TTTY23, TTTY23B, TSPY2, FAM197Y9, LINC00280, TTTY1, TTTY1B, TTTY2, TTTY2B, TTTY21, TTTY21B, TTTY7, TTTY7B, TTTY8, TTTY8B, AMELY, TBL1Y, PRKY, TTTY16, TTTY12, LINC00279, TTTY18, TTTY19, TTTY11, RBMY1A3P, TTTY20, TSPY1, TSPY10, TSPY3, TSPY4, TSPY8, FAM197Y4, FAM197Y5, FAM197Y7, FAM197Y8, FAM197Y2, FAM197Y6, FAM197Y3, RBMY3AP, T…
OMIM ® Genes Count: 33
OMIM ® Genes: SRY (480000), RPS4Y1 (470000), ZFY (490000), TGIF2LY (400025), PCDH11Y (400022), AMELY (410000), TBL1Y (400033), PRKY (400008), TSPY1 (480100), USP9Y (400005), DDX3Y (400010), UTY (400009), TMSB4Y (400017), VCY (400012), NLGN4Y (400028), XKRY (400015), CDY2A (400018), HSFY1 (400029), TXLNGY (400031), KDM5D (426000), EIF1AY (400014), RPS4Y2 (400030), RBMY1A1 (400006), PRY (400019), P…
Microarray Nomenclature: arr[GRCh38] Yp11.2q11.23(2,782,116_24,263,099)x2

## Sheet: Legend
Supplemental Data S1: Karyostat report for each analyzed 47,XYY iPSC clone. Full list of gained genes on the Y Chromosome detected by the array. PAR genes are erroneously assigned to the X Chromosome during the mapping.
