# Supplementary material for: An iPSC-based model of 47,XYY Jacobs syndrome reveals a DNA methylation-independent transcriptional dysregulation shared with male X aneuploid cells
Source: Genome Res. 2025 Jul;35(7):1503–17. doi: 10.1101/gr.279716.124 (PMC12212075; doi:10.1101/gr.279716.124)
Supplement: Supplement 3 [file Supplemental_Data_S2_R3.xlsx]

## Sheet: iPSCs_mono_bi_shared
Supplemental Data S2: List of mono and biallelic SNPs assigned to each 47,XYY iPSCs
chrom	GeneID	iPSCs.JS1_B_47XYY	iPSCs.JS1B_PS_47XYY	iPSCs.JS2_B_PS_47XYY	iPSCs.JS2_C_PS_47XYY	iPSCs.JS3_C_47XYY	iPSCs_JS3_C_PS.47XYY	Total_bi	Total_mono	chromosome_name	hgnc_symbol	start_position	end_position	description	isPAR	escape_Tukianien	variable_Tukianien	inactive_Tukianien
chr9	ENSG00000196205	monoallelic	monoallelic	monoallelic	monoallelic	monoallelic	monoallelic	0	6	9	EEF1A1P5	133019486	133020874	eukaryotic translation elongation factor 1 alpha 1 pseudogene 5 [Source:HGNC Symbol;Acc:HGNC:3200]	no	no	no	no
chr15	ENSG00000224078	monoallelic	monoallelic	monoallelic	monoallelic	monoallelic	monoallelic	0	6	15	SNHG14	24978583	25420336	small nucleolar RNA host gene 14 [Source:HGNC Symbol;Acc:HGNC:37462]	no	no	no	no
chr17	ENSG00000034152	monoallelic	monoallelic	monoallelic	monoallelic	monoallelic	monoallelic	0	6	17	MAP2K3	21284672	21315232	mitogen-activated protein kinase kinase 3 [Source:HGNC Symbol;Acc:HGNC:6843]	no	no	no	no
chr21	ENSG00000198618	monoallelic	monoallelic	monoallelic	monoallelic	monoallelic	monoallelic	0	6	21	PPIAP22	18857779	18858276	peptidylprolyl isomerase A pseudogene 22 [Source:HGNC Symbol;Acc:HGNC:17236]	no	no	no	no
chrX	ENSG00000168939	monoallelic	monoallelic	monoallelic	monoallelic	monoallelic	monoallelic	0	6	X	SPRY3	155612572	155782459	sprouty RTK signaling antagonist 3 [Source:HGNC Symbol;Acc:HGNC:11271]	no	no	no	yes
chr3	ENSG00000132967	monoallelic	monoallelic	monoallelic	monoallelic		monoallelic	0	5	3	HMGB1P5	22381720	22382929	high mobility group box 1 pseudogene 5 [Source:HGNC Symbol;Acc:HGNC:4997]	no	no	no	no
chr7	ENSG00000184863	monoallelic	monoallelic		monoallelic	monoallelic	monoallelic	0	5	7	RBM33	155644451	155781485	RNA binding motif protein 33 [Source:HGNC Symbol;Acc:HGNC:27223]	no	no	no	no
chr11	ENSG00000053918	monoallelic	monoallelic	monoallelic	monoallelic	monoallelic		0	5	11	KCNQ1	2444684	2849105	potassium voltage-gated channel subfamily Q member 1 [Source:HGNC Symbol;Acc:HGNC:6294]	no	no	no	no
chr14	ENSG00000214548	monoallelic	monoallelic	monoallelic	monoallelic	monoallelic		0	5	14	MEG3	100779410	100861031	maternally expressed 3 [Source:HGNC Symbol;Acc:HGNC:14575]	no	no	no	no
chr15	ENSG00000180229	monoallelic	monoallelic		monoallelic	monoallelic	monoallelic	0	5	15	HERC2P3	20431093	20505462	HERC2 pseudogene 3 [Source:HGNC Symbol;Acc:HGNC:4871]	no	no	no	no
chr19	ENSG00000232677	monoallelic	monoallelic	monoallelic	biallelic	monoallelic	monoallelic	1	5	19	LINC00665	36259540	36331770	long intergenic non-protein coding RNA 665 [Source:HGNC Symbol;Acc:HGNC:44323]	no	no	no	no
chr6	ENSG00000029363		monoallelic	monoallelic	monoallelic	monoallelic	monoallelic	0	5	6	BCLAF1	136256627	136289851	BCL2 associated transcription factor 1 [Source:HGNC Symbol;Acc:HGNC:16863]	no	no	no	no
chr1	ENSG00000143702	biallelic	biallelic	monoallelic	monoallelic	monoallelic	monoallelic	2	4	1	CEP170	243124428	243255348	centrosomal protein 170 [Source:HGNC Symbol;Acc:HGNC:28920]	no	no	no	no
chr1	ENSG00000265808	monoallelic	monoallelic	monoallelic	monoallelic			0	4	1	SEC22B	120150898	120176520	SEC22 homolog B, vesicle trafficking protein [Source:HGNC Symbol;Acc:HGNC:10700]	no	no	no	no
chr2	ENSG00000204186	monoallelic	monoallelic			monoallelic	monoallelic	0	4	2	ZDBF2	206274663	206314427	zinc finger DBF-type containing 2 [Source:HGNC Symbol;Acc:HGNC:29313]	no	no	no	no
chr5	ENSG00000145919	monoallelic	monoallelic			monoallelic	monoallelic	0	4	5	BOD1	173607145	173616659	biorientation of chromosomes in cell division 1 [Source:HGNC Symbol;Acc:HGNC:25114]	no	no	no	no
chr15	ENSG00000259781	monoallelic	monoallelic			monoallelic	monoallelic	0	4	15	HMGB1P6	71164770	71165415	high mobility group box 1 pseudogene 6 [Source:HGNC Symbol;Acc:HGNC:4998]	no	no	no	no
chr17	ENSG00000170291	biallelic	biallelic	monoallelic	monoallelic	monoallelic	monoallelic	2	4	17	ELP5	7251416	7259940	elongator acetyltransferase complex subunit 5 [Source:HGNC Symbol;Acc:HGNC:30617]	no	no	no	no
chrX	ENSG00000147274	monoallelic	monoallelic	monoallelic	monoallelic			0	4	X	RBMX	136848004	136880764	RNA binding motif protein X-linked [Source:HGNC Symbol;Acc:HGNC:9910]	no	no	no	yes
chrX	ENSG00000182484	monoallelic	monoallelic	biallelic	monoallelic		monoallelic	1	4	X	WASH6P	156020826	156025710	WASP family homolog 6, pseudogene [Source:HGNC Symbol;Acc:HGNC:31685]	PAR2	no	no	no
chr15	ENSG00000128739			monoallelic	monoallelic	monoallelic	monoallelic	0	4	15	SNRPN	24823637	24978723	small nuclear ribonucleoprotein polypeptide N [Source:HGNC Symbol;Acc:HGNC:11164]	no	no	no	no
chr15	ENSG00000254585			monoallelic	monoallelic	monoallelic	monoallelic	0	4	15	MAGEL2	23643549	23647867	MAGE family member L2 [Source:HGNC Symbol;Acc:HGNC:6814]	no	no	no	no
chr17	ENSG00000233966			monoallelic	monoallelic	monoallelic	monoallelic	0	4	17	UBE2SP1	15704232	15704900	ubiquitin conjugating enzyme E2 S pseudogene 1 [Source:HGNC Symbol;Acc:HGNC:30864]	no	no	no	no
chr1	ENSG00000219481	monoallelic	monoallelic	biallelic	biallelic		monoallelic	2	3	1	NBPF1	16562319	16613562	NBPF member 1 [Source:HGNC Symbol;Acc:HGNC:26088]	no	no	no	no
chr4	ENSG00000243449	monoallelic		monoallelic		monoallelic		0	3	4	C4orf48	2041995	2043964	chromosome 4 open reading frame 48 [Source:HGNC Symbol;Acc:HGNC:34437]	no	no	no	no
chr7	ENSG00000243896	monoallelic	biallelic	biallelic	biallelic	monoallelic	monoallelic	3	3	7	OR2A7	144257663	144264792	olfactory receptor family 2 subfamily A member 7 [Source:HGNC Symbol;Acc:HGNC:8234]	no	no	no	no
chr7	ENSG00000271079	monoallelic				monoallelic	monoallelic	0	3	7	CTAGE15	143571801	143574387	CTAGE family member 15 [Source:HGNC Symbol;Acc:HGNC:37295]	no	no	no	no
chr7	ENSG00000272391	biallelic	biallelic	monoallelic	biallelic	monoallelic	monoallelic	3	3	7	POM121C	75416786	75486299	POM121 transmembrane nucleoporin C [Source:HGNC Symbol;Acc:HGNC:34005]	no	no	no	no
chr10	ENSG00000189014	biallelic	biallelic	monoallelic	monoallelic	monoallelic		2	3	10	SHLD2P3	47689707	47730436	shieldin complex subunit 2 pseudogene 3 [Source:HGNC Symbol;Acc:HGNC:34038]	no	no	no	no
chr11	ENSG00000168010	biallelic	biallelic		monoallelic	monoallelic	monoallelic	2	3	11	ATG16L2	72814406	72843674	autophagy related 16 like 2 [Source:HGNC Symbol;Acc:HGNC:25464]	no	no	no	no
chr12	ENSG00000111704	monoallelic	biallelic			monoallelic	monoallelic	1	3	12	NANOG	7787794	7799146	Nanog homeobox [Source:HGNC Symbol;Acc:HGNC:20857]	no	no	no	no
chr19	ENSG00000022556	biallelic	monoallelic	biallelic	biallelic	monoallelic	monoallelic	3	3	19	NLRP2	54953130	55001142	NLR family pyrin domain containing 2 [Source:HGNC Symbol;Acc:HGNC:22948]	no	no	no	no
chr19	ENSG00000160321	biallelic	monoallelic	monoallelic	monoallelic	biallelic	biallelic	3	3	19	ZNF208	21932958	22010949	zinc finger protein 208 [Source:HGNC Symbol;Acc:HGNC:12999]	no	no	no	no
chr1	ENSG00000227232		monoallelic			monoallelic	monoallelic	0	3	1	WASH7P	14404	29570	WASP family homolog 7, pseudogene [Source:HGNC Symbol;Acc:HGNC:38034]	no	no	no	no
chr12	ENSG00000179899		monoallelic	monoallelic	biallelic	biallelic	monoallelic	2	3	12	PHC1P1	55411727	55414787	polyhomeotic homolog 1 pseudogene 1 [Source:HGNC Symbol;Acc:HGNC:34502]	no	no	no	no
chr17	ENSG00000278845			monoallelic	monoallelic	monoallelic		0	3	17	MRPL45	38297023	38323217	mitochondrial ribosomal protein L45 [Source:HGNC Symbol;Acc:HGNC:16651]	no	no	no	no
chr13	ENSG00000214182				monoallelic	monoallelic	monoallelic	0	3	13	PTMAP5	81689911	81691072	prothymosin alpha pseudogene 5 [Source:HGNC Symbol;Acc:HGNC:9628]	no	no	no	no
chr1	ENSG00000117262	monoallelic	monoallelic					0	2	1	GPR89A	145607988	145670650	G protein-coupled receptor 89A [Source:HGNC Symbol;Acc:HGNC:31984]	no	no	no	no
chr1	ENSG00000162873	biallelic	biallelic		monoallelic		monoallelic	2	2	1	KLHDC8A	205336061	205357090	kelch domain containing 8A [Source:HGNC Symbol;Acc:HGNC:25573]	no	no	no	no
chr1	ENSG00000171943	monoallelic	monoallelic					0	2	1	SRGAP2C	121184811	121392874	SLIT-ROBO Rho GTPase activating protein 2C [Source:HGNC Symbol;Acc:HGNC:30584]	no	no	no	no
chr1	ENSG00000173641	monoallelic	monoallelic					0	2	1	HSPB7	16014028	16019594	heat shock protein family B (small) member 7 [Source:HGNC Symbol;Acc:HGNC:5249]	no	no	no	no
chr1	ENSG00000188807	biallelic	biallelic	monoallelic			monoallelic	2	2	1	TMEM201	9588911	9614877	transmembrane protein 201 [Source:HGNC Symbol;Acc:HGNC:33719]	no	no	no	no
chr1	ENSG00000198754	biallelic	biallelic	monoallelic	monoallelic			2	2	1	OXCT2	39769523	39771348	3-oxoacid CoA-transferase 2 [Source:HGNC Symbol;Acc:HGNC:18606]	no	no	no	no
chr1	ENSG00000213516	monoallelic		monoallelic				0	2	1	RBMXL1	88979456	88992960	RBMX like 1 [Source:HGNC Symbol;Acc:HGNC:25073]	no	no	no	no
chr1	ENSG00000278267	monoallelic		monoallelic	biallelic		biallelic	2	2	1	MIR6859-1	17369	17436	microRNA 6859-1 [Source:HGNC Symbol;Acc:HGNC:50039]	no	no	no	no
chr2	ENSG00000115107	monoallelic	monoallelic					0	2	2	STEAP3	119223831	119265652	STEAP3 metalloreductase [Source:HGNC Symbol;Acc:HGNC:24592]	no	no	no	no
chr2	ENSG00000144583	monoallelic	monoallelic		biallelic			1	2	2	MARCHF4	216257865	216372483	membrane associated ring-CH-type finger 4 [Source:HGNC Symbol;Acc:HGNC:29269]	no	no	no	no
chr2	ENSG00000163521	monoallelic	biallelic				monoallelic	1	2	2	GLB1L	219236598	219245478	galactosidase beta 1 like [Source:HGNC Symbol;Acc:HGNC:28129]	no	no	no	no
chr2	ENSG00000196604	biallelic	biallelic	monoallelic	biallelic		monoallelic	3	2	2	POTEF	130073535	130129222	POTE ankyrin domain family member F [Source:HGNC Symbol;Acc:HGNC:33905]	no	no	no	no
chr3	ENSG00000144559	monoallelic	monoallelic	biallelic	biallelic	biallelic	biallelic	4	2	3	TAMM41	11790442	11846919	TAM41 mitochondrial translocator assembly and maintenance homolog [Source:HGNC Symbol;Acc:HGNC:25187]	no	no	no	no
chr3	ENSG00000249626	monoallelic	monoallelic			biallelic		1	2	3		197634315	197635811	protein phosphatase 4, regulatory subunit 2 (PPP4R2) pseudogene	no	no	no	no
chr4	ENSG00000118785	monoallelic	monoallelic			biallelic	biallelic	2	2	4	SPP1	87975667	87983532	secreted phosphoprotein 1 [Source:HGNC Symbol;Acc:HGNC:11255]	no	no	no	no
chr4	ENSG00000138759	biallelic	biallelic	biallelic	biallelic	monoallelic	monoallelic	4	2	4	FRAS1	78057323	78544269	Fraser extracellular matrix complex subunit 1 [Source:HGNC Symbol;Acc:HGNC:19185]	no	no	no	no
chr5	ENSG00000035499	monoallelic	monoallelic					0	2	5	DEPDC1B	60596912	60700190	DEP domain containing 1B [Source:HGNC Symbol;Acc:HGNC:24902]	no	no	no	no
chr5	ENSG00000081818	biallelic	biallelic	monoallelic	monoallelic			2	2	5	PCDHB4	141121818	141125623	protocadherin beta 4 [Source:HGNC Symbol;Acc:HGNC:8689]	no	no	no	no
chr5	ENSG00000250182	monoallelic	monoallelic					0	2	5	EEF1A1P13	14651941	14653329	eukaryotic translation elongation factor 1 alpha 1 pseudogene 13 [Source:HGNC Symbol;Acc:HGNC:3196]	no	no	no	no
chr6	ENSG00000111913	biallelic	biallelic	monoallelic	monoallelic			2	2	6	RIPOR2	24804282	25042170	RHO family interacting cell polarization regulator 2 [Source:HGNC Symbol;Acc:HGNC:13872]	no	no	no	no
chr6	ENSG00000137267	monoallelic	monoallelic					0	2	6	TUBB2A	3153497	3157544	tubulin beta 2A class IIa [Source:HGNC Symbol;Acc:HGNC:12412]	no	no	no	no
chr6	ENSG00000137285	monoallelic	monoallelic					0	2	6	TUBB2B	3223324	3231730	tubulin beta 2B class IIb [Source:HGNC Symbol;Acc:HGNC:30829]	no	no	no	no
chr6	ENSG00000212802	monoallelic	monoallelic					0	2	6	RPL15P3	12514110	12514724	ribosomal protein L15 pseudogene 3 [Source:HGNC Symbol;Acc:HGNC:21538]	no	no	no	no
chr7	ENSG00000242265	monoallelic	monoallelic					0	2	7	PEG10	94656325	94669695	paternally expressed 10 [Source:HGNC Symbol;Acc:HGNC:14005]	no	no	no	no
chr7	ENSG00000260097	monoallelic	monoallelic					0	2	7	SPDYE6	102345746	102356444	speedy/RINGO cell cycle regulator family member E6 [Source:HGNC Symbol;Acc:HGNC:35465]	no	no	no	no
chr7	ENSG00000263001	monoallelic	monoallelic			biallelic	biallelic	2	2	7	GTF2I	74650231	74760692	general transcription factor IIi [Source:HGNC Symbol;Acc:HGNC:4659]	no	no	no	no
chr7	ENSG00000277072	monoallelic	monoallelic					0	2	7	STAG3L2	74882705	74890402	stromal antigen 3-like 2 (pseudogene) [Source:HGNC Symbol;Acc:HGNC:33886]	no	no	no	no
chr7	ENSG00000277149	biallelic	monoallelic			biallelic	monoallelic	2	2	7	TYW1B	72558744	72828200	tRNA-yW synthesizing protein 1 homolog B [Source:HGNC Symbol;Acc:HGNC:33908]	no	no	no	no
chr8	ENSG00000253570	monoallelic	monoallelic					0	2	8	RNF5P1	38600661	38601200	ring finger protein 5 pseudogene 1 [Source:HGNC Symbol;Acc:HGNC:31053]	no	no	no	no
chr9	ENSG00000147996	monoallelic	monoallelic			biallelic	biallelic	2	2	9	ZNG1E	65668805	65734041	Zn regulated GTPase metalloprotein activator 1E [Source:HGNC Symbol;Acc:HGNC:24584]	no	no	no	no
chr9	ENSG00000159247	biallelic	biallelic			monoallelic	monoallelic	2	2	9	TUBBP5	138175045	138177264	tubulin beta pseudogene 5 [Source:HGNC Symbol;Acc:HGNC:23674]	no	no	no	no
chr10	ENSG00000187134	biallelic	monoallelic	monoallelic		biallelic	biallelic	3	2	10	AKR1C1	4963253	4983283	aldo-keto reductase family 1 member C1 [Source:HGNC Symbol;Acc:HGNC:384]	no	no	no	no
chr10	ENSG00000285257	monoallelic	monoallelic	biallelic	biallelic			2	2	10		87214136	87216173	synaptotagmin 15 (SYT15) pseudogene	no	no	no	no
chr11	ENSG00000110711	biallelic	biallelic	monoallelic	monoallelic			2	2	11	AIP	67468174	67491154	aryl hydrocarbon receptor interacting protein [Source:HGNC Symbol;Acc:HGNC:358]	no	no	no	no
chr11	ENSG00000171204	monoallelic	monoallelic					0	2	11	TMEM126B	85628573	85636539	transmembrane protein 126B [Source:HGNC Symbol;Acc:HGNC:30883]	no	no	no	no
chr12	ENSG00000075856	biallelic	biallelic	monoallelic	monoallelic			2	2	12	SART3	108522214	108561400	spliceosome associated factor 3, U4/U6 recycling protein [Source:HGNC Symbol;Acc:HGNC:16860]	no	no	no	no
chr12	ENSG00000171792	monoallelic	monoallelic	biallelic	biallelic			2	2	12	RHNO1	2876258	2889524	RAD9-HUS1-RAD1 interacting nuclear orphan 1 [Source:HGNC Symbol;Acc:HGNC:28206]	no	no	no	no
chr12	ENSG00000179195	biallelic		monoallelic	monoallelic			1	2	12	ZNF664	123971845	124015439	zinc finger protein 664 [Source:HGNC Symbol;Acc:HGNC:25406]	no	no	no	no
chr13	ENSG00000121390	biallelic	biallelic	biallelic	biallelic	monoallelic	monoallelic	4	2	13	PSPC1	19674752	19783019	paraspeckle component 1 [Source:HGNC Symbol;Acc:HGNC:20320]	no	no	no	no
chr14	ENSG00000224861	monoallelic	monoallelic					0	2	14	YBX1P1	66012830	66013789	Y-box binding protein 1 pseudogene 1 [Source:HGNC Symbol;Acc:HGNC:8015]	no	no	no	no
chr14	ENSG00000225746	monoallelic	monoallelic					0	2	14	MEG8	100894770	101038859	maternally expressed 8, small nucleolar RNA host gene [Source:HGNC Symbol;Acc:HGNC:14574]	no	no	no	no
chr14	ENSG00000277734	biallelic	biallelic	monoallelic	monoallelic			2	2	14	TRAC	22547506	22552156	T cell receptor alpha constant [Source:HGNC Symbol;Acc:HGNC:12029]	no	no	no	no
chr15	ENSG00000140263	biallelic	biallelic	monoallelic	monoallelic			2	2	15	SORD	45023147	45077185	sorbitol dehydrogenase [Source:HGNC Symbol;Acc:HGNC:11184]	no	no	no	no
chr15	ENSG00000140400	monoallelic	monoallelic	biallelic	biallelic			2	2	15	MAN2C1	75355207	75368612	mannosidase alpha class 2C member 1 [Source:HGNC Symbol;Acc:HGNC:6827]	no	no	no	no
chr15	ENSG00000156958	monoallelic		monoallelic	biallelic	biallelic	biallelic	3	2	15	GALK2	49155656	49367869	galactokinase 2 [Source:HGNC Symbol;Acc:HGNC:4119]	no	no	no	no
chr15	ENSG00000185787	monoallelic	biallelic		monoallelic			1	2	15	MORF4L1	78810487	78898139	mortality factor 4 like 1 [Source:HGNC Symbol;Acc:HGNC:16989]	no	no	no	no
chr15	ENSG00000253954	monoallelic	monoallelic					0	2	15	HMGN1P38	92711808	92712110	high mobility group nucleosome binding domain 1 pseudogene 38 [Source:HGNC Symbol;Acc:HGNC:39422]	no	no	no	no
chr15	ENSG00000259658	monoallelic	monoallelic			biallelic	biallelic	2	2	15	UBE2Q2P13	101732201	101745983	UBE2Q2 pseudogene 13 [Source:HGNC Symbol;Acc:HGNC:56078]	no	no	no	no
chr16	ENSG00000103226	monoallelic	monoallelic					0	2	16	NOMO3	16232506	16300806	NODAL modulator 3 [Source:HGNC Symbol;Acc:HGNC:25242]	no	no	no	no
chr16	ENSG00000103512	biallelic		monoallelic	monoallelic	biallelic	biallelic	3	2	16	NOMO1	14833721	14896157	NODAL modulator 1 [Source:HGNC Symbol;Acc:HGNC:30060]	no	no	no	no
chr16	ENSG00000185710	monoallelic	monoallelic					0	2	16	SMG1P4	21879338	21916024	SMG1 pseudogene 4 [Source:HGNC Symbol;Acc:HGNC:49861]	no	no	no	no
chr16	ENSG00000254206	biallelic	monoallelic	monoallelic	biallelic	biallelic	biallelic	4	2	16	NPIPB11	29381310	29406711	nuclear pore complex interacting protein family member B11 [Source:HGNC Symbol;Acc:HGNC:37453]	no	no	no	no
chr17	ENSG00000011295	biallelic			monoallelic		monoallelic	1	2	17	TTC19	15999784	16045015	tetratricopeptide repeat domain 19 [Source:HGNC Symbol;Acc:HGNC:26006]	no	no	no	no
chr17	ENSG00000185158	biallelic	biallelic			monoallelic	monoallelic	2	2	17	LRRC37B	32007383	32053504	leucine rich repeat containing 37B [Source:HGNC Symbol;Acc:HGNC:29070]	no	no	no	no
chr17	ENSG00000187688	biallelic	monoallelic	biallelic	biallelic		monoallelic	3	2	17	TRPV2	16415571	16437003	transient receptor potential cation channel subfamily V member 2 [Source:HGNC Symbol;Acc:HGNC:18082]	no	no	no	no
chr19	ENSG00000160352	monoallelic	monoallelic					0	2	19	ZNF714	21082159	21125270	zinc finger protein 714 [Source:HGNC Symbol;Acc:HGNC:27124]	no	no	no	no
chr19	ENSG00000197134	monoallelic	monoallelic				biallelic	1	2	19	ZNF257	22052430	22091480	zinc finger protein 257 [Source:HGNC Symbol;Acc:HGNC:13498]	no	no	no	no
chr19	ENSG00000197841	monoallelic	monoallelic			biallelic	biallelic	2	2	19	ZNF181	34734155	34745378	zinc finger protein 181 [Source:HGNC Symbol;Acc:HGNC:12971]	no	no	no	no
chr19	ENSG00000226686	monoallelic	biallelic		monoallelic			1	2	19	LINC01535	37251867	37265547	long intergenic non-protein coding RNA 1535 [Source:HGNC Symbol;Acc:HGNC:51282]	no	no	no	no
chr20	ENSG00000171456	monoallelic	monoallelic	biallelic	biallelic	biallelic	biallelic	4	2	20	ASXL1	32358330	32439319	ASXL transcriptional regulator 1 [Source:HGNC Symbol;Acc:HGNC:18318]	no	no	no	no
chr22	ENSG00000100426	biallelic	biallelic		monoallelic	monoallelic		2	2	22	ZBED4	49853844	49890080	zinc finger BED-type containing 4 [Source:HGNC Symbol;Acc:HGNC:20721]	no	no	no	no
chr22	ENSG00000184319	monoallelic	monoallelic					0	2	22	RPL23AP82	50798655	50799123	ribosomal protein L23a pseudogene 82 [Source:HGNC Symbol;Acc:HGNC:33730]	no	no	no	no
chr22	ENSG00000274602	monoallelic	monoallelic					0	2	22	PI4KAP1	18534005	18548798	phosphatidylinositol 4-kinase alpha pseudogene 1 [Source:HGNC Symbol;Acc:HGNC:33576]	no	no	no	no
chr3	ENSG00000132164		monoallelic		monoallelic			0	2	3	SLC6A11	10816201	10940714	solute carrier family 6 member 11 [Source:HGNC Symbol;Acc:HGNC:11044]	no	no	no	no
chr5	ENSG00000233974		biallelic	biallelic	biallelic	monoallelic	monoallelic	3	2	5		21481327	21484011	POM121 membrane glycoprotein (POM121) pseudogene	no	no	no	no
chr8	ENSG00000186523		monoallelic		monoallelic			0	2	8	FAM86B1	12182096	12194133	family with sequence similarity 86 member B1 [Source:HGNC Symbol;Acc:HGNC:28268]	no	no	no	no
chrX	ENSG00000147403		monoallelic		monoallelic			0	2	X	RPL10	154389955	154409168	ribosomal protein L10 [Source:HGNC Symbol;Acc:HGNC:10298]	no	no	no	yes
chr1	ENSG00000228502			monoallelic	monoallelic			0	2	1	EEF1A1P11	96446930	96448318	eukaryotic translation elongation factor 1 alpha 1 pseudogene 11 [Source:HGNC Symbol;Acc:HGNC:3206]	no	no	no	no
chr4	ENSG00000177432			monoallelic	monoallelic			0	2	4	NAP1L5	88695913	88697829	nucleosome assembly protein 1 like 5 [Source:HGNC Symbol;Acc:HGNC:19968]	no	no	no	no
chr5	ENSG00000086570			monoallelic		monoallelic		0	2	5	FAT2	151504092	151591331	FAT atypical cadherin 2 [Source:HGNC Symbol;Acc:HGNC:3596]	no	no	no	no
chr7	ENSG00000122674			biallelic	biallelic	monoallelic	monoallelic	2	2	7	CCZ1	5898725	5926550	CCZ1 homolog, vacuolar protein trafficking and biogenesis associated [Source:HGNC Symbol;Acc:HGNC:21691]	no	no	no	no
chr8	ENSG00000168300			monoallelic	monoallelic	biallelic	biallelic	2	2	8	PCMTD1	51817575	51899186	protein-L-isoaspartate (D-aspartate) O-methyltransferase domain containing 1 [Source:HGNC Symbol;Acc:HGNC:30483]	no	no	no	no
chr8	ENSG00000212993			monoallelic	monoallelic			0	2	8	POU5F1B	127322183	127420066	POU class 5 homeobox 1B [Source:HGNC Symbol;Acc:HGNC:9223]	no	no	no	no
chr15	ENSG00000182636			monoallelic	monoallelic			0	2	15	NDN	23685400	23687305	necdin, MAGE family member [Source:HGNC Symbol;Acc:HGNC:7675]	no	no	no	no
chr16	ENSG00000008517			monoallelic	monoallelic	biallelic	biallelic	2	2	16	IL32	3065297	3082192	interleukin 32 [Source:HGNC Symbol;Acc:HGNC:16830]	no	no	no	no
chr19	ENSG00000196081			monoallelic	monoallelic	biallelic	biallelic	2	2	19	ZNF724	23221599	23250394	zinc finger protein 724 [Source:HGNC Symbol;Acc:HGNC:32460]	no	no	no	no
chr22	ENSG00000237214			monoallelic	monoallelic			0	2	22		41064052	41064633	ribosomal protein S9 (RPS9) pseudogene	no	no	no	no
chrX	ENSG00000124333			monoallelic	monoallelic			0	2	X	VAMP7	155881345	155943769	vesicle associated membrane protein 7 [Source:HGNC Symbol;Acc:HGNC:11486]	PAR2	no	no	yes
chr6	ENSG00000112164				monoallelic		monoallelic	0	2	6	GLP1R	39048781	39091303	glucagon like peptide 1 receptor [Source:HGNC Symbol;Acc:HGNC:4324]	no	no	no	no
chr19	ENSG00000214855				monoallelic	monoallelic		0	2	19	APOC1P1	44926976	44931058	apolipoprotein C1 pseudogene 1 [Source:HGNC Symbol;Acc:HGNC:608]	no	no	no	no
chrX	ENSG00000094841				monoallelic	monoallelic		0	2	X	UPRT	75156388	75304885	uracil phosphoribosyltransferase homolog [Source:HGNC Symbol;Acc:HGNC:28334]	no	no	no	yes
chr8	ENSG00000254285					monoallelic	monoallelic	0	2	8	KRT8P3	61578220	61579668	keratin 8 pseudogene 3 [Source:HGNC Symbol;Acc:HGNC:31056]	no	no	no	no
chr12	ENSG00000139239					monoallelic	monoallelic	0	2	12	RPL14P1	62965325	62965969	ribosomal protein L14 pseudogene 1 [Source:HGNC Symbol;Acc:HGNC:31384]	no	no	no	no
chr16	ENSG00000169877					monoallelic	monoallelic	0	2	16	AHSP	31527900	31528803	alpha hemoglobin stabilizing protein [Source:HGNC Symbol;Acc:HGNC:18075]	no	no	no	no
chr17	ENSG00000072210					monoallelic	monoallelic	0	2	17	ALDH3A2	19648136	19685760	aldehyde dehydrogenase 3 family member A2 [Source:HGNC Symbol;Acc:HGNC:403]	no	no	no	no
chr19	ENSG00000105205					monoallelic	monoallelic	0	2	19	CLC	39731255	39738029	Charcot-Leyden crystal galectin [Source:HGNC Symbol;Acc:HGNC:2014]	no	no	no	no
chr1	ENSG00000066185	biallelic			monoallelic			1	1	1	ZMYND12	42430329	42456253	zinc finger MYND-type containing 12 [Source:HGNC Symbol;Acc:HGNC:21192]	no	no	no	no
chr1	ENSG00000084636	biallelic	biallelic		monoallelic	biallelic	biallelic	4	1	1	COL16A1	31652263	31704319	collagen type XVI alpha 1 chain [Source:HGNC Symbol;Acc:HGNC:2193]	no	no	no	no
chr1	ENSG00000090020	biallelic	biallelic	biallelic	biallelic	monoallelic		4	1	1	SLC9A1	27098809	27166981	solute carrier family 9 member A1 [Source:HGNC Symbol;Acc:HGNC:11071]	no	no	no	no
chr1	ENSG00000116285	biallelic	biallelic	monoallelic				2	1	1	ERRFI1	8004404	8026309	ERBB receptor feedback inhibitor 1 [Source:HGNC Symbol;Acc:HGNC:18185]	no	no	no	no
chr1	ENSG00000117013	biallelic		monoallelic		biallelic	biallelic	3	1	1	KCNQ4	40783787	40840452	potassium voltage-gated channel subfamily Q member 4 [Source:HGNC Symbol;Acc:HGNC:6298]	no	no	no	no
chr1	ENSG00000117410	biallelic	biallelic	biallelic	biallelic	monoallelic		4	1	1	ATP6V0B	43974487	43978295	ATPase H+ transporting V0 subunit b [Source:HGNC Symbol;Acc:HGNC:861]	no	no	no	no
chr1	ENSG00000117597	biallelic	biallelic	biallelic	biallelic		monoallelic	4	1	1	UTP25	209827972	209857565	UTP25 small subunit processome component [Source:HGNC Symbol;Acc:HGNC:28440]	no	no	no	no
chr1	ENSG00000119285	biallelic	biallelic		monoallelic	biallelic	biallelic	4	1	1	HEATR1	236549005	236604516	HEAT repeat containing 1 [Source:HGNC Symbol;Acc:HGNC:25517]	no	no	no	no
chr1	ENSG00000133067	biallelic					monoallelic	1	1	1	LGR6	202193799	202319781	leucine rich repeat containing G protein-coupled receptor 6 [Source:HGNC Symbol;Acc:HGNC:19719]	no	no	no	no
chr1	ENSG00000142606	biallelic	biallelic				monoallelic	2	1	1	MMEL1	2590639	2633016	membrane metalloendopeptidase like 1 [Source:HGNC Symbol;Acc:HGNC:14668]	no	no	no	no
chr1	ENSG00000142733	biallelic	biallelic	monoallelic		biallelic	biallelic	4	1	1	MAP3K6	27355184	27366961	mitogen-activated protein kinase kinase kinase 6 [Source:HGNC Symbol;Acc:HGNC:6858]	no	no	no	no
chr1	ENSG00000143603	biallelic	monoallelic					1	1	1	KCNN3	154697455	154870281	potassium calcium-activated channel subfamily N member 3 [Source:HGNC Symbol;Acc:HGNC:6292]	no	no	no	no
chr1	ENSG00000152092	biallelic	biallelic	monoallelic		biallelic	biallelic	4	1	1	ASTN1	176857302	177164973	astrotactin 1 [Source:HGNC Symbol;Acc:HGNC:773]	no	no	no	no
chr1	ENSG00000158966	biallelic	biallelic		monoallelic			2	1	1	CACHD1	64470129	64693058	cache domain containing 1 [Source:HGNC Symbol;Acc:HGNC:29314]	no	no	no	no
chr1	ENSG00000164010	biallelic	monoallelic			biallelic	biallelic	3	1	1	ERMAP	42817122	42844991	erythroblast membrane associated protein (Scianna blood group) [Source:HGNC Symbol;Acc:HGNC:15743]	no	no	no	no
chr1	ENSG00000183317	biallelic	biallelic	monoallelic	biallelic	biallelic		4	1	1	EPHA10	37713880	37765133	EPH receptor A10 [Source:HGNC Symbol;Acc:HGNC:19987]	no	no	no	no
chr1	ENSG00000183682	biallelic	monoallelic					1	1	1	BMP8A	39491636	39529869	bone morphogenetic protein 8a [Source:HGNC Symbol;Acc:HGNC:21650]	no	no	no	no
chr1	ENSG00000183853	biallelic	biallelic		monoallelic			2	1	1	KIRREL1	157993273	158100262	kirre like nephrin family adhesion molecule 1 [Source:HGNC Symbol;Acc:HGNC:15734]	no	no	no	no
chr1	ENSG00000184588	monoallelic		biallelic				1	1	1	PDE4B	65792514	66374579	phosphodiesterase 4B [Source:HGNC Symbol;Acc:HGNC:8781]	no	no	no	no
chr1	ENSG00000184908	biallelic	biallelic	biallelic	biallelic		monoallelic	4	1	1	CLCNKB	16040252	16057311	chloride voltage-gated channel Kb [Source:HGNC Symbol;Acc:HGNC:2027]	no	no	no	no
chr1	ENSG00000185842	monoallelic	biallelic				biallelic	2	1	1	DNAH14	224896262	225399292	dynein axonemal heavy chain 14 [Source:HGNC Symbol;Acc:HGNC:2945]	no	no	no	no
chr1	ENSG00000188910	monoallelic						0	1	1	GJB3	34781214	34786369	gap junction protein beta 3 [Source:HGNC Symbol;Acc:HGNC:4285]	no	no	no	no
chr1	ENSG00000189280	monoallelic				biallelic		1	1	1	GJB5	34755047	34758512	gap junction protein beta 5 [Source:HGNC Symbol;Acc:HGNC:4287]	no	no	no	no
chr1	ENSG00000189339	biallelic	biallelic		biallelic	monoallelic	biallelic	4	1	1	SLC35E2B	1659529	1692795	solute carrier family 35 member E2B [Source:HGNC Symbol;Acc:HGNC:33941]	no	no	no	no
chr1	ENSG00000235750	biallelic	biallelic		monoallelic			2	1	1	KIAA0040	175156986	175192999	KIAA0040 [Source:HGNC Symbol;Acc:HGNC:28950]	no	no	no	no
chr1	ENSG00000243709	monoallelic	biallelic			biallelic	biallelic	3	1	1	LEFTY1	225886282	225911382	left-right determination factor 1 [Source:HGNC Symbol;Acc:HGNC:6552]	no	no	no	no
chr1	ENSG00000263956	biallelic	biallelic			monoallelic		2	1	1	NBPF11	148102047	148152322	NBPF member 11 [Source:HGNC Symbol;Acc:HGNC:31993]	no	no	no	no
chr1	ENSG00000281207	monoallelic		biallelic	biallelic			2	1	1	SLFNL1-AS1	41014590	41043890	SLFNL1 antisense RNA 1 [Source:HGNC Symbol;Acc:HGNC:44126]	no	no	no	no
chr2	ENSG00000005448	monoallelic				biallelic	biallelic	2	1	2	WDR54	74421678	74425755	WD repeat domain 54 [Source:HGNC Symbol;Acc:HGNC:25770]	no	no	no	no
chr2	ENSG00000035115	biallelic	biallelic		monoallelic	biallelic	biallelic	4	1	2	SH3YL1	217730	266398	SH3 and SYLF domain containing 1 [Source:HGNC Symbol;Acc:HGNC:29546]	no	no	no	no
chr2	ENSG00000057935	biallelic					monoallelic	1	1	2	MTA3	42494569	42756947	metastasis associated 1 family member 3 [Source:HGNC Symbol;Acc:HGNC:23784]	no	no	no	no
chr2	ENSG00000071967	biallelic	biallelic	monoallelic				2	1	2	CYBRD1	171522247	171558129	cytochrome b reductase 1 [Source:HGNC Symbol;Acc:HGNC:20797]	no	no	no	no
chr2	ENSG00000115806	biallelic	biallelic	monoallelic		biallelic	biallelic	4	1	2	GORASP2	170928464	170967130	golgi reassembly stacking protein 2 [Source:HGNC Symbol;Acc:HGNC:17500]	no	no	no	no
chr2	ENSG00000130294	biallelic	biallelic	monoallelic			biallelic	3	1	2	KIF1A	240713761	240824293	kinesin family member 1A [Source:HGNC Symbol;Acc:HGNC:888]	no	no	no	no
chr2	ENSG00000132330	biallelic	biallelic	monoallelic	biallelic	biallelic	biallelic	5	1	2	SCLY	238060924	238099413	selenocysteine lyase [Source:HGNC Symbol;Acc:HGNC:18161]	no	no	no	no
chr2	ENSG00000136717	biallelic	biallelic	biallelic	biallelic	monoallelic	biallelic	5	1	2	BIN1	127048027	127107288	bridging integrator 1 [Source:HGNC Symbol;Acc:HGNC:1052]	no	no	no	no
chr2	ENSG00000144134	monoallelic	biallelic					1	1	2	RABL2A	113627229	113643396	RAB, member of RAS oncogene family like 2A [Source:HGNC Symbol;Acc:HGNC:9799]	no	no	no	no
chr2	ENSG00000155368	monoallelic	biallelic					1	1	2	DBI	119366924	119372550	diazepam binding inhibitor, acyl-CoA binding protein [Source:HGNC Symbol;Acc:HGNC:2690]	no	no	no	no
chr2	ENSG00000163219	biallelic	monoallelic					1	1	2	ARHGAP25	68679601	68826833	Rho GTPase activating protein 25 [Source:HGNC Symbol;Acc:HGNC:28951]	no	no	no	no
chr2	ENSG00000175084	biallelic	monoallelic			biallelic	biallelic	3	1	2	DES	219418377	219426735	desmin [Source:HGNC Symbol;Acc:HGNC:2770]	no	no	no	no
chr2	ENSG00000187833	monoallelic						0	1	2	C2orf78	73784183	73817148	chromosome 2 open reading frame 78 [Source:HGNC Symbol;Acc:HGNC:34349]	no	no	no	no
chr2	ENSG00000188219	monoallelic	biallelic					1	1	2	POTEE	131209536	131265278	POTE ankyrin domain family member E [Source:HGNC Symbol;Acc:HGNC:33895]	no	no	no	no
chr3	ENSG00000031081	biallelic	monoallelic	biallelic	biallelic			3	1	3	ARHGAP31	119294383	119420714	Rho GTPase activating protein 31 [Source:HGNC Symbol;Acc:HGNC:29216]	no	no	no	no
chr3	ENSG00000091972	biallelic	biallelic		monoallelic	biallelic	biallelic	4	1	3	CD200	112332347	112362812	CD200 molecule [Source:HGNC Symbol;Acc:HGNC:7203]	no	no	no	no
chr3	ENSG00000144712	monoallelic		biallelic	biallelic			2	1	3	CAND2	12796472	12834804	cullin associated and neddylation dissociated 2 (putative) [Source:HGNC Symbol;Acc:HGNC:30689]	no	no	no	no
chr3	ENSG00000144847	biallelic			biallelic	monoallelic	biallelic	3	1	3	IGSF11	118900557	119146068	immunoglobulin superfamily member 11 [Source:HGNC Symbol;Acc:HGNC:16669]	no	no	no	no
chr3	ENSG00000154783	biallelic	biallelic	biallelic	biallelic		monoallelic	4	1	3	FGD5	14810853	14934571	FYVE, RhoGEF and PH domain containing 5 [Source:HGNC Symbol;Acc:HGNC:19117]	no	no	no	no
chr3	ENSG00000158163	biallelic	biallelic		monoallelic	biallelic	biallelic	4	1	3	DZIP1L	138061990	138115818	DAZ interacting zinc finger protein 1 like [Source:HGNC Symbol;Acc:HGNC:26551]	no	no	no	no
chr3	ENSG00000164068	monoallelic	biallelic			biallelic		2	1	3	RNF123	49689538	49721529	ring finger protein 123 [Source:HGNC Symbol;Acc:HGNC:21148]	no	no	no	no
chr3	ENSG00000175093	monoallelic				biallelic	biallelic	2	1	3	SPSB4	141051347	141148611	splA/ryanodine receptor domain and SOCS box containing 4 [Source:HGNC Symbol;Acc:HGNC:30630]	no	no	no	no
chr3	ENSG00000175182	biallelic	biallelic	monoallelic		biallelic	biallelic	4	1	3	FAM131A	184335926	184348421	family with sequence similarity 131 member A [Source:HGNC Symbol;Acc:HGNC:28308]	no	no	no	no
chr3	ENSG00000181555	biallelic	biallelic		monoallelic	biallelic	biallelic	4	1	3	SETD2	47016428	47164113	SET domain containing 2, histone lysine methyltransferase [Source:HGNC Symbol;Acc:HGNC:18420]	no	no	no	no
chr3	ENSG00000184432	monoallelic						0	1	3	COPB2	139353946	139389736	COPI coat complex subunit beta 2 [Source:HGNC Symbol;Acc:HGNC:2232]	no	no	no	no
chr3	ENSG00000224660	monoallelic	biallelic	biallelic	biallelic			3	1	3	SH3BP5-AS1	15254184	15264515	SH3BP5 antisense RNA 1 [Source:HGNC Symbol;Acc:HGNC:44501]	no	no	no	no
chr3	ENSG00000231443	biallelic	monoallelic			biallelic	biallelic	3	1	3		195937243	195938739	protein phosphatase 4, regulatory subunit 2 (PPP4R2) pseudogene	no	no	no	no
chr4	ENSG00000109586	biallelic	biallelic	biallelic	biallelic	monoallelic		4	1	4	GALNT7	173168811	173323967	polypeptide N-acetylgalactosaminyltransferase 7 [Source:HGNC Symbol;Acc:HGNC:4129]	no	no	no	no
chr4	ENSG00000109771	monoallelic	biallelic			biallelic	biallelic	3	1	4	LRP2BP	185363872	185395924	LRP2 binding protein [Source:HGNC Symbol;Acc:HGNC:25434]	no	no	no	no
chr4	ENSG00000145241	biallelic	biallelic		monoallelic	biallelic	biallelic	4	1	4	CENPC	67468762	67545503	centromere protein C [Source:HGNC Symbol;Acc:HGNC:1854]	no	no	no	no
chr4	ENSG00000169836	monoallelic	biallelic					1	1	4	TACR3	103586031	103719985	tachykinin receptor 3 [Source:HGNC Symbol;Acc:HGNC:11528]	no	no	no	no
chr4	ENSG00000173083	monoallelic	biallelic			biallelic	biallelic	3	1	4	HPSE	83292461	83335153	heparanase [Source:HGNC Symbol;Acc:HGNC:5164]	no	no	no	no
chr4	ENSG00000173376	biallelic	biallelic	monoallelic		biallelic	biallelic	4	1	4	NDNF	121035613	121073021	neuron derived neurotrophic factor [Source:HGNC Symbol;Acc:HGNC:26256]	no	no	no	no
chr4	ENSG00000186867	monoallelic						0	1	4	QRFPR	121328642	121381059	pyroglutamylated RFamide peptide receptor [Source:HGNC Symbol;Acc:HGNC:15565]	no	no	no	no
chr4	ENSG00000188848	biallelic	biallelic	monoallelic				2	1	4	BEND4	42110853	42152878	BEN domain containing 4 [Source:HGNC Symbol;Acc:HGNC:23815]	no	no	no	no
chr4	ENSG00000279943	monoallelic						0	1	4		186189032	186191490	uncharacterized LOC651430 [Source:NCBI gene (formerly Entrezgene);Acc:651430]	no	no	no	no
chr5	ENSG00000082213	biallelic	biallelic	monoallelic				2	1	5	C5orf22	31532287	31555053	chromosome 5 open reading frame 22 [Source:HGNC Symbol;Acc:HGNC:25639]	no	no	no	no
chr5	ENSG00000120327	biallelic	monoallelic	biallelic	biallelic		biallelic	4	1	5	PCDHB14	141223343	141227759	protocadherin beta 14 [Source:HGNC Symbol;Acc:HGNC:8685]	no	no	no	no
chr5	ENSG00000133706	biallelic	biallelic	monoallelic				2	1	5	LARS1	146110566	146182696	leucyl-tRNA synthetase 1 [Source:HGNC Symbol;Acc:HGNC:6512]	no	no	no	no
chr5	ENSG00000155846	biallelic	biallelic	monoallelic	biallelic			3	1	5	PPARGC1B	149730298	149855022	PPARG coactivator 1 beta [Source:HGNC Symbol;Acc:HGNC:30022]	no	no	no	no
chr5	ENSG00000164338	monoallelic		biallelic	biallelic			2	1	5	UTP15	73565443	73583380	UTP15 small subunit processome component [Source:HGNC Symbol;Acc:HGNC:25758]	no	no	no	no
chr5	ENSG00000164406	biallelic	monoallelic					1	1	5	LEAP2	132873444	132875046	liver enriched antimicrobial peptide 2 [Source:HGNC Symbol;Acc:HGNC:29571]	no	no	no	no
chr5	ENSG00000164611	biallelic	biallelic			monoallelic	biallelic	3	1	5	PTTG1	160421855	160428739	PTTG1 regulator of sister chromatid separation, securin [Source:HGNC Symbol;Acc:HGNC:9690]	no	no	no	no
chr5	ENSG00000168944	monoallelic		biallelic	biallelic	biallelic	biallelic	4	1	5	CEP120	123344890	123423592	centrosomal protein 120 [Source:HGNC Symbol;Acc:HGNC:26690]	no	no	no	no
chr5	ENSG00000170231	biallelic	biallelic	monoallelic				2	1	5	FABP6	160187367	160238735	fatty acid binding protein 6 [Source:HGNC Symbol;Acc:HGNC:3561]	no	no	no	no
chr5	ENSG00000176783	biallelic	biallelic	biallelic	biallelic	monoallelic		4	1	5	RUFY1	179550554	179610012	RUN and FYVE domain containing 1 [Source:HGNC Symbol;Acc:HGNC:19760]	no	no	no	no
chr5	ENSG00000183666	monoallelic				biallelic	biallelic	2	1	5	GUSBP1	21459560	21501826	GUSB pseudogene 1 [Source:HGNC Symbol;Acc:HGNC:13670]	no	no	no	no
chr5	ENSG00000197083	biallelic	monoallelic			biallelic		2	1	5	ZNF300P1	150930763	150946289	zinc finger protein 300 pseudogene 1 [Source:HGNC Symbol;Acc:HGNC:27032]	no	no	no	no
chr5	ENSG00000215158	biallelic	biallelic		monoallelic	biallelic	biallelic	4	1	5	GUSBP18	34175822	34218343	GUSB pseudogene 18 [Source:HGNC Symbol;Acc:HGNC:55770]	no	no	no	no
chr5	ENSG00000225138	biallelic		biallelic	monoallelic		biallelic	3	1	5	SLC9A3-AS1	473236	480884	SLC9A3 antisense RNA 1 [Source:HGNC Symbol;Acc:HGNC:40550]	no	no	no	no
chr6	ENSG00000078269	biallelic	biallelic	biallelic	biallelic		monoallelic	4	1	6	SYNJ2	157981863	158099176	synaptojanin 2 [Source:HGNC Symbol;Acc:HGNC:11504]	no	no	no	no
chr6	ENSG00000112419	monoallelic				biallelic	biallelic	2	1	6	PHACTR2	143536845	143831185	phosphatase and actin regulator 2 [Source:HGNC Symbol;Acc:HGNC:20956]	no	no	no	no
chr6	ENSG00000112561	monoallelic						0	1	6	TFEB	41683978	41736259	transcription factor EB [Source:HGNC Symbol;Acc:HGNC:11753]	no	no	no	no
chr6	ENSG00000112659	biallelic	biallelic	monoallelic				2	1	6	CUL9	43182184	43224587	cullin 9 [Source:HGNC Symbol;Acc:HGNC:15982]	no	no	no	no
chr6	ENSG00000112679	biallelic	monoallelic	biallelic	biallelic	biallelic	biallelic	5	1	6	DUSP22	291630	351355	dual specificity phosphatase 22 [Source:HGNC Symbol;Acc:HGNC:16077]	no	no	no	no
chr6	ENSG00000118482	biallelic	biallelic		monoallelic			2	1	6	PHF3	63635802	63779336	PHD finger protein 3 [Source:HGNC Symbol;Acc:HGNC:8921]	no	no	no	no
chr6	ENSG00000151917	biallelic	biallelic				monoallelic	2	1	6	BEND6	56955107	57027346	BEN domain containing 6 [Source:HGNC Symbol;Acc:HGNC:20871]	no	no	no	no
chr6	ENSG00000161904	biallelic	biallelic	biallelic	biallelic	monoallelic		4	1	6	LEMD2	33771202	33789130	LEM domain nuclear envelope protein 2 [Source:HGNC Symbol;Acc:HGNC:21244]	no	no	no	no
chr6	ENSG00000168298	biallelic	monoallelic					1	1	6	H1-4	26156329	26157115	H1.4 linker histone, cluster member [Source:HGNC Symbol;Acc:HGNC:4718]	no	no	no	no
chr6	ENSG00000178233	biallelic	biallelic		monoallelic	biallelic	biallelic	4	1	6	TMEM151B	44270450	44307506	transmembrane protein 151B [Source:HGNC Symbol;Acc:HGNC:21315]	no	no	no	no
chr6	ENSG00000187837	monoallelic	biallelic	biallelic	biallelic			3	1	6	H1-2	26055740	26056470	H1.2 linker histone, cluster member [Source:HGNC Symbol;Acc:HGNC:4716]	no	no	no	no
chr6	ENSG00000188820	monoallelic	biallelic			biallelic		2	1	6	CALHM6	116461370	116463771	calcium homeostasis modulator family member 6 [Source:HGNC Symbol;Acc:HGNC:33391]	no	no	no	no
chr6	ENSG00000204140	biallelic				monoallelic	biallelic	2	1	6	CLPSL1	35781019	35793675	colipase like 1 [Source:HGNC Symbol;Acc:HGNC:21251]	no	no	no	no
chr6	ENSG00000204344	monoallelic	biallelic		biallelic			2	1	6	STK19	31971091	31982821	serine/threonine kinase 19 [Source:HGNC Symbol;Acc:HGNC:11398]	no	no	no	no
chr6	ENSG00000204348	monoallelic						0	1	6	DXO	31969810	31972290	decapping exoribonuclease [Source:HGNC Symbol;Acc:HGNC:2992]	no	no	no	no
chr6	ENSG00000204396	monoallelic	biallelic	biallelic	biallelic			3	1	6	VWA7	31765590	31777328	von Willebrand factor A domain containing 7 [Source:HGNC Symbol;Acc:HGNC:13939]	no	no	no	no
chr6	ENSG00000204622	biallelic	monoallelic					1	1	6	HLA-J	30006606	30009539	major histocompatibility complex, class I, J (pseudogene) [Source:HGNC Symbol;Acc:HGNC:4967]	no	no	no	no
chr6	ENSG00000204632	biallelic	biallelic		biallelic	biallelic	monoallelic	4	1	6	HLA-G	29826967	29831125	major histocompatibility complex, class I, G [Source:HGNC Symbol;Acc:HGNC:4964]	no	no	no	no
chr6	ENSG00000204642	biallelic	biallelic		monoallelic			2	1	6	HLA-F	29722775	29738528	major histocompatibility complex, class I, F [Source:HGNC Symbol;Acc:HGNC:4963]	no	no	no	no
chr6	ENSG00000204644	biallelic	monoallelic			biallelic	biallelic	3	1	6	ZFP57	29672483	29681155	ZFP57 zinc finger protein [Source:HGNC Symbol;Acc:HGNC:18791]	no	no	no	no
chr7	ENSG00000006606	biallelic	monoallelic					1	1	7	CCL26	75769533	75789896	C-C motif chemokine ligand 26 [Source:HGNC Symbol;Acc:HGNC:10625]	no	no	no	no
chr7	ENSG00000008311	monoallelic		biallelic	biallelic		biallelic	3	1	7	AASS	122064583	122144308	aminoadipate-semialdehyde synthase [Source:HGNC Symbol;Acc:HGNC:17366]	no	no	no	no
chr7	ENSG00000066923	biallelic	biallelic	biallelic	biallelic		monoallelic	4	1	7	STAG3	100177563	100221488	stromal antigen 3 [Source:HGNC Symbol;Acc:HGNC:11356]	no	no	no	no
chr7	ENSG00000078487	monoallelic						0	1	7	ZCWPW1	100400826	100428992	zinc finger CW-type and PWWP domain containing 1 [Source:HGNC Symbol;Acc:HGNC:23486]	no	no	no	no
chr7	ENSG00000106069	biallelic	monoallelic					1	1	7	CHN2	29146547	29514328	chimerin 2 [Source:HGNC Symbol;Acc:HGNC:1944]	no	no	no	no
chr7	ENSG00000106341	monoallelic	biallelic					1	1	7	PPP1R17	31687215	31708455	protein phosphatase 1 regulatory subunit 17 [Source:HGNC Symbol;Acc:HGNC:16973]	no	no	no	no
chr7	ENSG00000122778	biallelic	biallelic		monoallelic	biallelic	biallelic	4	1	7	KIAA1549	138831381	138981389	KIAA1549 [Source:HGNC Symbol;Acc:HGNC:22219]	no	no	no	no
chr7	ENSG00000146530	biallelic	biallelic	monoallelic		biallelic	biallelic	4	1	7	VWDE	12330885	12403941	von Willebrand factor D and EGF domains [Source:HGNC Symbol;Acc:HGNC:21897]	no	no	no	no
chr7	ENSG00000170632	biallelic	biallelic		monoallelic	biallelic	biallelic	4	1	7	ARMC10	103074881	103099759	armadillo repeat containing 10 [Source:HGNC Symbol;Acc:HGNC:21706]	no	no	no	no
chr7	ENSG00000186480	biallelic	biallelic		biallelic	biallelic	monoallelic	4	1	7	INSIG1	155297776	155310235	insulin induced gene 1 [Source:HGNC Symbol;Acc:HGNC:6083]	no	no	no	no
chr7	ENSG00000197093	biallelic	biallelic	biallelic	biallelic		monoallelic	4	1	7	GAL3ST4	100159244	100168617	galactose-3-O-sulfotransferase 4 [Source:HGNC Symbol;Acc:HGNC:24145]	no	no	no	no
chr7	ENSG00000197558	biallelic	biallelic		monoallelic			2	1	7	SSPOP	149776042	149833979	SCO-spondin, pseudogene [Source:HGNC Symbol;Acc:HGNC:21998]	no	no	no	no
chr7	ENSG00000205578	monoallelic						0	1	7	POM121B	73293497	73301161	POM121 transmembrane nucleoporin B (pseudogene) [Source:HGNC Symbol;Acc:HGNC:34004]	no	no	no	no
chr7	ENSG00000243302	biallelic	biallelic				monoallelic	2	1	7		128651185	128652334	novel pseudogene	no	no	no	no
chr7	ENSG00000257335	monoallelic						0	1	7	MGAM	141907813	142106747	maltase-glucoamylase [Source:HGNC Symbol;Acc:HGNC:7043]	no	no	no	no
chr8	ENSG00000012232	monoallelic		biallelic	biallelic			2	1	8	EXTL3	28600469	28756561	exostosin like glycosyltransferase 3 [Source:HGNC Symbol;Acc:HGNC:3518]	no	no	no	no
chr8	ENSG00000040341	biallelic	biallelic	biallelic	biallelic		monoallelic	4	1	8	STAU2	73420369	73747708	staufen double-stranded RNA binding protein 2 [Source:HGNC Symbol;Acc:HGNC:11371]	no	no	no	no
chr8	ENSG00000104368	biallelic	biallelic	biallelic	monoallelic	biallelic	biallelic	5	1	8	PLAT	42174718	42207709	plasminogen activator, tissue type [Source:HGNC Symbol;Acc:HGNC:9051]	no	no	no	no
chr8	ENSG00000134013	biallelic	biallelic		monoallelic	biallelic	biallelic	4	1	8	LOXL2	23296897	23425328	lysyl oxidase like 2 [Source:HGNC Symbol;Acc:HGNC:6666]	no	no	no	no
chr8	ENSG00000156509	biallelic	biallelic			monoallelic		2	1	8	FBXO43	100133351	100145817	F-box protein 43 [Source:HGNC Symbol;Acc:HGNC:28521]	no	no	no	no
chr8	ENSG00000164929	monoallelic						0	1	8	BAALC	103140713	103230305	BAALC binder of MAP3K1 and KLF4 [Source:HGNC Symbol;Acc:HGNC:14333]	no	no	no	no
chr8	ENSG00000171316	biallelic	biallelic			monoallelic		2	1	8	CHD7	60678740	60868028	chromodomain helicase DNA binding protein 7 [Source:HGNC Symbol;Acc:HGNC:20626]	no	no	no	no
chr8	ENSG00000177570	biallelic			monoallelic	biallelic	biallelic	3	1	8	SAMD12	118189455	118622112	sterile alpha motif domain containing 12 [Source:HGNC Symbol;Acc:HGNC:31750]	no	no	no	no
chr8	ENSG00000178209	biallelic	biallelic	biallelic	biallelic		monoallelic	4	1	8	PLEC	143915153	143976734	plectin [Source:HGNC Symbol;Acc:HGNC:9069]	no	no	no	no
chr8	ENSG00000204882	monoallelic	biallelic					1	1	8	GPR20	141356470	141367286	G protein-coupled receptor 20 [Source:HGNC Symbol;Acc:HGNC:4475]	no	no	no	no
chr8	ENSG00000284610	monoallelic						0	1	8		12014831	12015049	RNA binding protein, fox-1 homolog (C. elegans) 1 (RBFOX1) pseudogene	no	no	no	no
chr9	ENSG00000083067	biallelic	biallelic				monoallelic	2	1	9	TRPM3	70529060	71446904	transient receptor potential cation channel subfamily M member 3 [Source:HGNC Symbol;Acc:HGNC:17992]	no	no	no	no
chr9	ENSG00000095397	biallelic	biallelic	biallelic	biallelic		monoallelic	4	1	9	WHRN	114402080	114505473	whirlin [Source:HGNC Symbol;Acc:HGNC:16361]	no	no	no	no
chr9	ENSG00000106714	biallelic	biallelic	biallelic	monoallelic		biallelic	4	1	9	CNTNAP3	39064710	39288315	contactin associated protein family member 3 [Source:HGNC Symbol;Acc:HGNC:13834]	no	no	no	no
chr9	ENSG00000131669	biallelic	biallelic		monoallelic			2	1	9	NINJ1	93121496	93134251	ninjurin 1 [Source:HGNC Symbol;Acc:HGNC:7824]	no	no	no	no
chr9	ENSG00000148357	biallelic	biallelic		monoallelic	biallelic	biallelic	4	1	9	HMCN2	130265760	130434123	hemicentin 2 [Source:HGNC Symbol;Acc:HGNC:21293]	no	no	no	no
chr9	ENSG00000148411	biallelic	biallelic	monoallelic		biallelic	biallelic	4	1	9	NACC2	136006537	136095289	NACC family member 2 [Source:HGNC Symbol;Acc:HGNC:23846]	no	no	no	no
chr9	ENSG00000155886	monoallelic				biallelic		1	1	9	SLC24A2	19507452	19789037	solute carrier family 24 member 2 [Source:HGNC Symbol;Acc:HGNC:10976]	no	no	no	no
chr9	ENSG00000158079	biallelic	biallelic	monoallelic				2	1	9	PTPDC1	94030794	94109856	protein tyrosine phosphatase domain containing 1 [Source:HGNC Symbol;Acc:HGNC:30184]	no	no	no	no
chr9	ENSG00000180264	monoallelic			biallelic			1	1	9	ADGRD2	124450451	124478589	adhesion G protein-coupled receptor D2 [Source:HGNC Symbol;Acc:HGNC:18651]	no	no	no	no
chr9	ENSG00000186130	biallelic	biallelic			monoallelic		2	1	9	ZBTB6	122908056	122913323	zinc finger and BTB domain containing 6 [Source:HGNC Symbol;Acc:HGNC:16764]	no	no	no	no
chr9	ENSG00000188152	monoallelic						0	1	9	NUTM2G	96928310	96940253	NUT family member 2G [Source:HGNC Symbol;Acc:HGNC:23449]	no	no	no	no
chr9	ENSG00000196730	biallelic	biallelic		monoallelic	biallelic	biallelic	4	1	9	DAPK1	87497228	87708634	death associated protein kinase 1 [Source:HGNC Symbol;Acc:HGNC:2674]	no	no	no	no
chr9	ENSG00000197694	biallelic	biallelic				monoallelic	2	1	9	SPTAN1	128552558	128633662	spectrin alpha, non-erythrocytic 1 [Source:HGNC Symbol;Acc:HGNC:11273]	no	no	no	no
chr9	ENSG00000233016	biallelic	biallelic				monoallelic	2	1	9	SNHG7	136721366	136728184	small nucleolar RNA host gene 7 [Source:HGNC Symbol;Acc:HGNC:28254]	no	no	no	no
chr9	ENSG00000238227	biallelic	biallelic	biallelic	biallelic		monoallelic	4	1	9	TMEM250	136114581	136118875	transmembrane protein 250 [Source:HGNC Symbol;Acc:HGNC:31009]	no	no	no	no
chr10	ENSG00000108187	biallelic	biallelic			monoallelic	biallelic	3	1	10	PBLD	68282660	68333049	phenazine biosynthesis like protein domain containing [Source:HGNC Symbol;Acc:HGNC:23301]	no	no	no	no
chr10	ENSG00000119943	monoallelic						0	1	10	PYROXD2	98383565	98415182	pyridine nucleotide-disulphide oxidoreductase domain 2 [Source:HGNC Symbol;Acc:HGNC:23517]	no	no	no	no
chr10	ENSG00000120051	biallelic	biallelic	monoallelic				2	1	10	CFAP58	104353833	104455102	cilia and flagella associated protein 58 [Source:HGNC Symbol;Acc:HGNC:26676]	no	no	no	no
chr10	ENSG00000123243	biallelic	biallelic	monoallelic	biallelic			3	1	10	ITIH5	7559270	7666998	inter-alpha-trypsin inhibitor heavy chain 5 [Source:HGNC Symbol;Acc:HGNC:21449]	no	no	no	no
chr10	ENSG00000151465	biallelic	monoallelic					1	1	10	CDC123	12195965	12250589	cell division cycle 123 [Source:HGNC Symbol;Acc:HGNC:16827]	no	no	no	no
chr10	ENSG00000155629	biallelic				monoallelic		1	1	10	PIK3AP1	96593315	96720514	phosphoinositide-3-kinase adaptor protein 1 [Source:HGNC Symbol;Acc:HGNC:30034]	no	no	no	no
chr10	ENSG00000165568	biallelic	monoallelic	biallelic	biallelic		biallelic	4	1	10	AKR1E2	4786629	4848062	aldo-keto reductase family 1 member E2 [Source:HGNC Symbol;Acc:HGNC:23437]	no	no	no	no
chr10	ENSG00000181192	biallelic	biallelic	biallelic	biallelic	monoallelic		4	1	10	DHTKD1	12068954	12123221	dehydrogenase E1 and transketolase domain containing 1 [Source:HGNC Symbol;Acc:HGNC:23537]	no	no	no	no
chr10	ENSG00000183621	biallelic				monoallelic		1	1	10	ZNF438	30820207	31031937	zinc finger protein 438 [Source:HGNC Symbol;Acc:HGNC:21029]	no	no	no	no
chr10	ENSG00000196233	biallelic	biallelic				monoallelic	2	1	10	LCOR	96832254	96995956	ligand dependent nuclear receptor corepressor [Source:HGNC Symbol;Acc:HGNC:29503]	no	no	no	no
chr11	ENSG00000005801	biallelic	biallelic				monoallelic	2	1	11	ZNF195	3339261	3379222	zinc finger protein 195 [Source:HGNC Symbol;Acc:HGNC:12986]	no	no	no	no
chr11	ENSG00000060749	monoallelic						0	1	11	QSER1	32892811	32993316	glutamine and serine rich 1 [Source:HGNC Symbol;Acc:HGNC:26154]	no	no	no	no
chr11	ENSG00000137513	biallelic	biallelic	monoallelic				2	1	11	NARS2	78435620	78575194	asparaginyl-tRNA synthetase 2, mitochondrial [Source:HGNC Symbol;Acc:HGNC:26274]	no	no	no	no
chr11	ENSG00000149115	biallelic	biallelic	biallelic	biallelic		monoallelic	4	1	11	TNKS1BP1	57299638	57324952	tankyrase 1 binding protein 1 [Source:HGNC Symbol;Acc:HGNC:19081]	no	no	no	no
chr11	ENSG00000149196	biallelic	biallelic	biallelic	biallelic	biallelic	monoallelic	5	1	11	HIKESHI	86302211	86345943	heat shock protein nuclear import factor hikeshi [Source:HGNC Symbol;Acc:HGNC:26938]	no	no	no	no
chr11	ENSG00000149548	biallelic	biallelic		monoallelic		biallelic	3	1	11	CCDC15	124954121	125041489	coiled-coil domain containing 15 [Source:HGNC Symbol;Acc:HGNC:25798]	no	no	no	no
chr11	ENSG00000149823	monoallelic		biallelic	biallelic			2	1	11	VPS51	65089324	65111862	VPS51 subunit of GARP complex [Source:HGNC Symbol;Acc:HGNC:1172]	no	no	no	no
chr11	ENSG00000150455	biallelic	monoallelic	biallelic	biallelic	biallelic	biallelic	5	1	11	TIRAP	126282497	126298845	TIR domain containing adaptor protein [Source:HGNC Symbol;Acc:HGNC:17192]	no	no	no	no
chr11	ENSG00000162298	biallelic	monoallelic	biallelic	biallelic			3	1	11	SYVN1	65121780	65134532	synoviolin 1 [Source:HGNC Symbol;Acc:HGNC:20738]	no	no	no	no
chr11	ENSG00000165495	monoallelic	biallelic					1	1	11	PKNOX2	125164687	125433389	PBX/knotted 1 homeobox 2 [Source:HGNC Symbol;Acc:HGNC:16714]	no	no	no	no
chr11	ENSG00000166012	biallelic	biallelic				monoallelic	2	1	11	TAF1D	93729948	93784391	TATA-box binding protein associated factor, RNA polymerase I subunit D [Source:HGNC Symbol;Acc:HGNC:28759]	no	no	no	no
chr11	ENSG00000166407	biallelic			monoallelic			1	1	11	LMO1	8224309	8268716	LIM domain only 1 [Source:HGNC Symbol;Acc:HGNC:6641]	no	no	no	no
chr11	ENSG00000173020	biallelic	biallelic		monoallelic			2	1	11	GRK2	67266473	67286556	G protein-coupled receptor kinase 2 [Source:HGNC Symbol;Acc:HGNC:289]	no	no	no	no
chr11	ENSG00000173825	monoallelic						0	1	11	TIGD3	65354751	65357613	tigger transposable element derived 3 [Source:HGNC Symbol;Acc:HGNC:18334]	no	no	no	no
chr11	ENSG00000221968	monoallelic	biallelic			biallelic	biallelic	3	1	11	FADS3	61873519	61892051	fatty acid desaturase 3 [Source:HGNC Symbol;Acc:HGNC:3576]	no	no	no	no
chr12	ENSG00000004478	biallelic	monoallelic					1	1	12	FKBP4	2794970	2805423	FKBP prolyl isomerase 4 [Source:HGNC Symbol;Acc:HGNC:3720]	no	no	no	no
chr12	ENSG00000013573	biallelic	biallelic	monoallelic	biallelic	biallelic	biallelic	5	1	12	DDX11	31073860	31104799	DEAD/H-box helicase 11 [Source:HGNC Symbol;Acc:HGNC:2736]	no	no	no	no
chr12	ENSG00000089041	monoallelic		biallelic				1	1	12	P2RX7	121132819	121188032	purinergic receptor P2X 7 [Source:HGNC Symbol;Acc:HGNC:8537]	no	no	no	no
chr12	ENSG00000090975	biallelic	monoallelic					1	1	12	PITPNM2	122983480	123151090	phosphatidylinositol transfer protein membrane associated 2 [Source:HGNC Symbol;Acc:HGNC:21044]	no	no	no	no
chr12	ENSG00000111788	biallelic	biallelic	biallelic	biallelic		monoallelic	4	1	12		9277235	9313241	DEAD/H (Asp-Glu-Ala-Asp/His) box polypeptide like pseudogene	no	no	no	no
chr12	ENSG00000135119	biallelic	biallelic			monoallelic		2	1	12	RNFT2	116738178	116853631	ring finger protein, transmembrane 2 [Source:HGNC Symbol;Acc:HGNC:25905]	no	no	no	no
chr12	ENSG00000136010	monoallelic				biallelic	biallelic	2	1	12	ALDH1L2	105019784	105107643	aldehyde dehydrogenase 1 family member L2 [Source:HGNC Symbol;Acc:HGNC:26777]	no	no	no	no
chr12	ENSG00000151067	biallelic					monoallelic	1	1	12	CACNA1C	1970772	2697950	calcium voltage-gated channel subunit alpha1 C [Source:HGNC Symbol;Acc:HGNC:1390]	no	no	no	no
chr12	ENSG00000158023	biallelic	biallelic	monoallelic		biallelic	biallelic	4	1	12	CFAP251	121918592	122003927	cilia and flagella associated protein 251 [Source:HGNC Symbol;Acc:HGNC:28506]	no	no	no	no
chr12	ENSG00000171759	biallelic		biallelic	monoallelic	biallelic	biallelic	4	1	12	PAH	102836889	102958410	phenylalanine hydroxylase [Source:HGNC Symbol;Acc:HGNC:8582]	no	no	no	no
chr12	ENSG00000175548	biallelic	biallelic	biallelic	biallelic	biallelic	monoallelic	5	1	12	ALG10B	38316762	38329721	ALG10 alpha-1,2-glucosyltransferase B [Source:HGNC Symbol;Acc:HGNC:31088]	no	no	no	no
chr12	ENSG00000185163	biallelic	biallelic	monoallelic	biallelic	biallelic	biallelic	5	1	12	DDX51	132136594	132144319	DEAD-box helicase 51 [Source:HGNC Symbol;Acc:HGNC:20082]	no	no	no	no
chr12	ENSG00000256436	biallelic			monoallelic			1	1	12	TAS2R31	11030387	11031407	taste 2 receptor member 31 [Source:HGNC Symbol;Acc:HGNC:19113]	no	no	no	no
chr12	ENSG00000280287	biallelic	monoallelic	biallelic		biallelic	biallelic	4	1	12		132550729	132554947	novel transcript	no	no	no	no
chr13	ENSG00000073910	monoallelic		biallelic	biallelic	biallelic	biallelic	4	1	13	FRY	31846713	32299125	FRY microtubule binding protein [Source:HGNC Symbol;Acc:HGNC:20367]	no	no	no	no
chr13	ENSG00000102543	biallelic	monoallelic					1	1	13	CDADC1	49247925	49293485	cytidine and dCMP deaminase domain containing 1 [Source:HGNC Symbol;Acc:HGNC:20299]	no	no	no	no
chr13	ENSG00000120658	monoallelic						0	1	13	ENOX1	43213130	43786972	ecto-NOX disulfide-thiol exchanger 1 [Source:HGNC Symbol;Acc:HGNC:25474]	no	no	no	no
chr13	ENSG00000130177	monoallelic						0	1	13	CDC16	114234887	114272723	cell division cycle 16 [Source:HGNC Symbol;Acc:HGNC:1720]	no	no	no	no
chr13	ENSG00000133107	biallelic		monoallelic		biallelic		2	1	13	TRPC4	37632063	37869802	transient receptor potential cation channel subfamily C member 4 [Source:HGNC Symbol;Acc:HGNC:12336]	no	no	no	no
chr13	ENSG00000150457	biallelic	biallelic	biallelic	biallelic	monoallelic		4	1	13	LATS2	20973036	21061586	large tumor suppressor kinase 2 [Source:HGNC Symbol;Acc:HGNC:6515]	no	no	no	no
chr13	ENSG00000184497	biallelic		monoallelic	biallelic		biallelic	3	1	13	TMEM255B	113759226	113816995	transmembrane protein 255B [Source:HGNC Symbol;Acc:HGNC:28297]	no	no	no	no
chr14	ENSG00000072110	biallelic	biallelic	biallelic	biallelic		monoallelic	4	1	14	ACTN1	68874128	68979440	actinin alpha 1 [Source:HGNC Symbol;Acc:HGNC:163]	no	no	no	no
chr14	ENSG00000100938	biallelic	monoallelic	biallelic	biallelic			3	1	14	GMPR2	24232422	24239242	guanosine monophosphate reductase 2 [Source:HGNC Symbol;Acc:HGNC:4377]	no	no	no	no
chr14	ENSG00000119681	monoallelic						0	1	14	LTBP2	74498183	74612378	latent transforming growth factor beta binding protein 2 [Source:HGNC Symbol;Acc:HGNC:6715]	no	no	no	no
chr14	ENSG00000126214	biallelic	biallelic				monoallelic	2	1	14	KLC1	103561896	103714249	kinesin light chain 1 [Source:HGNC Symbol;Acc:HGNC:6387]	no	no	no	no
chr14	ENSG00000165501	biallelic	biallelic	biallelic	biallelic		monoallelic	4	1	14	LRR1	49598761	49614672	leucine rich repeat protein 1 [Source:HGNC Symbol;Acc:HGNC:19742]	no	no	no	no
chr14	ENSG00000213231	monoallelic	biallelic					1	1	14	TCL1B	95686426	95692628	TCL1 family AKT coactivator B [Source:HGNC Symbol;Acc:HGNC:11649]	no	no	no	no
chr14	ENSG00000258986	monoallelic			biallelic		biallelic	2	1	14	TMEM179	104474678	104605647	transmembrane protein 179 [Source:HGNC Symbol;Acc:HGNC:20137]	no	no	no	no
chr15	ENSG00000103653	biallelic	biallelic		monoallelic			2	1	15	CSK	74782080	74803197	C-terminal Src kinase [Source:HGNC Symbol;Acc:HGNC:2444]	no	no	no	no
chr15	ENSG00000104093	biallelic	biallelic	biallelic	biallelic	monoallelic		4	1	15	DMXL2	51447711	51622833	Dmx like 2 [Source:HGNC Symbol;Acc:HGNC:2938]	no	no	no	no
chr15	ENSG00000128849	biallelic	biallelic	biallelic	biallelic		monoallelic	4	1	15	CGNL1	57375967	57550717	cingulin like 1 [Source:HGNC Symbol;Acc:HGNC:25931]	no	no	no	no
chr15	ENSG00000140323	monoallelic		biallelic	biallelic			2	1	15	DISP2	40358219	40378621	dispatched RND transporter family member 2 [Source:HGNC Symbol;Acc:HGNC:19712]	no	no	no	no
chr15	ENSG00000140386	biallelic	biallelic		monoallelic	biallelic	biallelic	4	1	15	SCAPER	76347904	76905444	S-phase cyclin A associated protein in the ER [Source:HGNC Symbol;Acc:HGNC:13081]	no	no	no	no
chr15	ENSG00000140497	monoallelic				biallelic	biallelic	2	1	15	SCAMP2	74843730	74873365	secretory carrier membrane protein 2 [Source:HGNC Symbol;Acc:HGNC:10564]	no	no	no	no
chr15	ENSG00000166762	monoallelic						0	1	15	CATSPER2	43628503	43668118	cation channel sperm associated 2 [Source:HGNC Symbol;Acc:HGNC:18810]	no	no	no	no
chr15	ENSG00000167202	biallelic	monoallelic			biallelic	biallelic	3	1	15	TBC1D2B	77984036	78077724	TBC1 domain family member 2B [Source:HGNC Symbol;Acc:HGNC:29183]	no	no	no	no
chr15	ENSG00000178802	biallelic	biallelic		monoallelic			2	1	15	MPI	74890005	74902219	mannose phosphate isomerase [Source:HGNC Symbol;Acc:HGNC:7216]	no	no	no	no
chr15	ENSG00000188277	monoallelic	biallelic				biallelic	2	1	15	C15orf62	40769980	40772449	chromosome 15 open reading frame 62 [Source:HGNC Symbol;Acc:HGNC:34489]	no	no	no	no
chr15	ENSG00000198901	biallelic	monoallelic					1	1	15	PRC1	90966040	90995629	protein regulator of cytokinesis 1 [Source:HGNC Symbol;Acc:HGNC:9341]	no	no	no	no
chr15	ENSG00000261377	biallelic			monoallelic			1	1	15	PDCD6IPP2	28801366	28818999	PDCD6IP pseudogene 2 [Source:HGNC Symbol;Acc:HGNC:49873]	no	no	no	no
chr16	ENSG00000102893	monoallelic				biallelic	biallelic	2	1	16	PHKB	47461123	47701523	phosphorylase kinase regulatory subunit beta [Source:HGNC Symbol;Acc:HGNC:8927]	no	no	no	no
chr16	ENSG00000103024	biallelic	biallelic			monoallelic		2	1	16	NME3	1770320	1771561	NME/NM23 nucleoside diphosphate kinase 3 [Source:HGNC Symbol;Acc:HGNC:7851]	no	no	no	no
chr16	ENSG00000103184	biallelic	monoallelic	biallelic	biallelic	biallelic	biallelic	5	1	16	SEC14L5	4958330	5019157	SEC14 like lipid binding 5 [Source:HGNC Symbol;Acc:HGNC:29032]	no	no	no	no
chr16	ENSG00000103248	monoallelic		biallelic	biallelic			2	1	16	MTHFSD	86530178	86555235	methenyltetrahydrofolate synthetase domain containing [Source:HGNC Symbol;Acc:HGNC:25778]	no	no	no	no
chr16	ENSG00000103365	monoallelic		biallelic	biallelic			2	1	16	GGA2	23463542	23521995	golgi associated, gamma adaptin ear containing, ARF binding protein 2 [Source:HGNC Symbol;Acc:HGNC:16064]	no	no	no	no
chr16	ENSG00000103549	monoallelic						0	1	16	RNF40	30761745	30776307	ring finger protein 40 [Source:HGNC Symbol;Acc:HGNC:16867]	no	no	no	no
chr16	ENSG00000122254	biallelic	monoallelic					1	1	16	HS3ST2	22814162	22916338	heparan sulfate-glucosamine 3-sulfotransferase 2 [Source:HGNC Symbol;Acc:HGNC:5195]	no	no	no	no
chr16	ENSG00000131148	monoallelic						0	1	16	EMC8	85771758	85799608	ER membrane protein complex subunit 8 [Source:HGNC Symbol;Acc:HGNC:7864]	no	no	no	no
chr16	ENSG00000140961	monoallelic	biallelic			biallelic		2	1	16	OSGIN1	83931311	83966332	oxidative stress induced growth inhibitor 1 [Source:HGNC Symbol;Acc:HGNC:30093]	no	no	no	no
chr16	ENSG00000140995	biallelic	biallelic	monoallelic	biallelic	biallelic	biallelic	5	1	16	DEF8	89948697	89968060	differentially expressed in FDCP 8 homolog [Source:HGNC Symbol;Acc:HGNC:25969]	no	no	no	no
chr16	ENSG00000161996	monoallelic		biallelic	biallelic	biallelic	biallelic	4	1	16	WDR90	649311	667833	WD repeat domain 90 [Source:HGNC Symbol;Acc:HGNC:26960]	no	no	no	no
chr16	ENSG00000167978	biallelic	biallelic		monoallelic	biallelic	biallelic	4	1	16	SRRM2	2752626	2772538	serine/arginine repetitive matrix 2 [Source:HGNC Symbol;Acc:HGNC:16639]	no	no	no	no
chr16	ENSG00000169682	monoallelic						0	1	16	SPNS1	28974221	28984548	sphingolipid transporter 1 (putative) [Source:HGNC Symbol;Acc:HGNC:30621]	no	no	no	no
chr16	ENSG00000183793	biallelic	biallelic		monoallelic			2	1	16	NPIPA5	15363628	15381047	nuclear pore complex interacting protein family member A5 [Source:HGNC Symbol;Acc:HGNC:41980]	no	no	no	no
chr16	ENSG00000198156	biallelic	monoallelic			biallelic		2	1	16	NPIPB6	28342517	28363508	nuclear pore complex interacting protein family member B6 [Source:HGNC Symbol;Acc:HGNC:37454]	no	no	no	no
chr16	ENSG00000205629	biallelic	biallelic			monoallelic		2	1	16	LCMT1	25111731	25178231	leucine carboxyl methyltransferase 1 [Source:HGNC Symbol;Acc:HGNC:17557]	no	no	no	no
chr16	ENSG00000225614	biallelic	monoallelic	biallelic	biallelic	biallelic	biallelic	5	1	16	ZNF469	88382959	88440757	zinc finger protein 469 [Source:HGNC Symbol;Acc:HGNC:23216]	no	no	no	no
chr17	ENSG00000006025	monoallelic		biallelic	biallelic			2	1	17	OSBPL7	47807372	47821834	oxysterol binding protein like 7 [Source:HGNC Symbol;Acc:HGNC:16387]	no	no	no	no
chr17	ENSG00000072134	monoallelic						0	1	17	EPN2	19215615	19336715	epsin 2 [Source:HGNC Symbol;Acc:HGNC:18639]	no	no	no	no
chr17	ENSG00000072778	biallelic	biallelic	monoallelic			biallelic	3	1	17	ACADVL	7217125	7225266	acyl-CoA dehydrogenase very long chain [Source:HGNC Symbol;Acc:HGNC:92]	no	no	no	no
chr17	ENSG00000087191	biallelic	biallelic		monoallelic	biallelic	biallelic	4	1	17	PSMC5	63827152	63832026	proteasome 26S subunit, ATPase 5 [Source:HGNC Symbol;Acc:HGNC:9552]	no	no	no	no
chr17	ENSG00000108578	monoallelic				biallelic	biallelic	2	1	17	BLMH	30248203	30292056	bleomycin hydrolase [Source:HGNC Symbol;Acc:HGNC:1059]	no	no	no	no
chr17	ENSG00000108828	biallelic	biallelic		monoallelic			2	1	17	VAT1	43014607	43025123	vesicle amine transport 1 [Source:HGNC Symbol;Acc:HGNC:16919]	no	no	no	no
chr17	ENSG00000108852	biallelic	biallelic			monoallelic		2	1	17	MPP2	43875357	43909711	MAGUK p55 scaffold protein 2 [Source:HGNC Symbol;Acc:HGNC:7220]	no	no	no	no
chr17	ENSG00000108963	biallelic	biallelic	biallelic	biallelic	monoallelic		4	1	17	DPH1	2030137	2043898	diphthamide biosynthesis 1 [Source:HGNC Symbol;Acc:HGNC:3003]	no	no	no	no
chr17	ENSG00000121064	biallelic		biallelic	biallelic	monoallelic		3	1	17	SCPEP1	56978129	57006768	serine carboxypeptidase 1 [Source:HGNC Symbol;Acc:HGNC:29507]	no	no	no	no
chr17	ENSG00000129235	monoallelic						0	1	17	TXNDC17	6640985	6644541	thioredoxin domain containing 17 [Source:HGNC Symbol;Acc:HGNC:28218]	no	no	no	no
chr17	ENSG00000132591	biallelic	biallelic		monoallelic	biallelic	biallelic	4	1	17	ERAL1	28855010	28861061	Era like 12S mitochondrial rRNA chaperone 1 [Source:HGNC Symbol;Acc:HGNC:3424]	no	no	no	no
chr17	ENSG00000169689	biallelic	biallelic	biallelic	biallelic	monoallelic	biallelic	5	1	17	CENPX	82018702	82024107	centromere protein X [Source:HGNC Symbol;Acc:HGNC:11422]	no	no	no	no
chr17	ENSG00000171246	biallelic	monoallelic	biallelic	biallelic			3	1	17	NPTX1	80466834	80477843	neuronal pentraxin 1 [Source:HGNC Symbol;Acc:HGNC:7952]	no	no	no	no
chr17	ENSG00000178607	biallelic	biallelic		monoallelic	biallelic	biallelic	4	1	17	ERN1	64039080	64130819	endoplasmic reticulum to nucleus signaling 1 [Source:HGNC Symbol;Acc:HGNC:3449]	no	no	no	no
chr17	ENSG00000179314	biallelic	biallelic		monoallelic	biallelic	biallelic	4	1	17	WSCD1	6057807	6124427	WSC domain containing 1 [Source:HGNC Symbol;Acc:HGNC:29060]	no	no	no	no
chr17	ENSG00000182040	monoallelic						0	1	17	USH1G	74916083	74923256	USH1 protein network component sans [Source:HGNC Symbol;Acc:HGNC:16356]	no	no	no	no
chr17	ENSG00000184185	monoallelic						0	1	17	KCNJ12	21376357	21419870	potassium inwardly rectifying channel subfamily J member 12 [Source:HGNC Symbol;Acc:HGNC:6258]	no	no	no	no
chr17	ENSG00000185156	biallelic	biallelic		monoallelic	biallelic	biallelic	4	1	17	MFSD6L	8797110	8799365	major facilitator superfamily domain containing 6 like [Source:HGNC Symbol;Acc:HGNC:26656]	no	no	no	no
chr17	ENSG00000185624	biallelic	biallelic	monoallelic	biallelic	biallelic	biallelic	5	1	17	P4HB	81843159	81860856	prolyl 4-hydroxylase subunit beta [Source:HGNC Symbol;Acc:HGNC:8548]	no	no	no	no
chr17	ENSG00000188803	monoallelic						0	1	17	SHISA6	11241213	11564063	shisa family member 6 [Source:HGNC Symbol;Acc:HGNC:34491]	no	no	no	no
chr17	ENSG00000196169	biallelic		biallelic	biallelic	monoallelic		3	1	17	KIF19	74326210	74355820	kinesin family member 19 [Source:HGNC Symbol;Acc:HGNC:26735]	no	no	no	no
chr17	ENSG00000231421	monoallelic						0	1	17		30573471	30577000	novel transcript	no	no	no	no
chr18	ENSG00000134775	biallelic	biallelic	monoallelic		biallelic	biallelic	4	1	18	FHOD3	36297713	36780220	formin homology 2 domain containing 3 [Source:HGNC Symbol;Acc:HGNC:26178]	no	no	no	no
chr19	ENSG00000008382	biallelic	biallelic	monoallelic	biallelic			3	1	19	MPND	4343527	4360086	MPN domain containing [Source:HGNC Symbol;Acc:HGNC:25934]	no	no	no	no
chr19	ENSG00000075702	biallelic	biallelic			monoallelic		2	1	19	WDR62	36054649	36105108	WD repeat domain 62 [Source:HGNC Symbol;Acc:HGNC:24502]	no	no	no	no
chr19	ENSG00000083812	monoallelic	biallelic					1	1	19	ZNF324	58467056	58475436	zinc finger protein 324 [Source:HGNC Symbol;Acc:HGNC:14096]	no	no	no	no
chr19	ENSG00000089335	monoallelic						0	1	19	ZNF302	34677639	34686397	zinc finger protein 302 [Source:HGNC Symbol;Acc:HGNC:13848]	no	no	no	no
chr19	ENSG00000104964	biallelic	monoallelic	biallelic	biallelic	biallelic	biallelic	5	1	19	TLE5	3052910	3063107	TLE family member 5, transcriptional modulator [Source:HGNC Symbol;Acc:HGNC:307]	no	no	no	no
chr19	ENSG00000105122	monoallelic						0	1	19	RASAL3	15451624	15464544	RAS protein activator like 3 [Source:HGNC Symbol;Acc:HGNC:26129]	no	no	no	no
chr19	ENSG00000105613	biallelic	biallelic				monoallelic	2	1	19	MAST1	12833951	12874952	microtubule associated serine/threonine kinase 1 [Source:HGNC Symbol;Acc:HGNC:19034]	no	no	no	no
chr19	ENSG00000116014	biallelic			monoallelic		biallelic	2	1	19	KISS1R	917287	921005	KISS1 receptor [Source:HGNC Symbol;Acc:HGNC:4510]	no	no	no	no
chr19	ENSG00000127666	monoallelic				biallelic		1	1	19	TICAM1	4815932	4831712	TIR domain containing adaptor molecule 1 [Source:HGNC Symbol;Acc:HGNC:18348]	no	no	no	no
chr19	ENSG00000130307	biallelic	monoallelic	biallelic	biallelic	biallelic	biallelic	5	1	19	USHBP1	17249171	17282786	USH1 protein network component harmonin binding protein 1 [Source:HGNC Symbol;Acc:HGNC:24058]	no	no	no	no
chr19	ENSG00000130726	biallelic	biallelic		monoallelic	biallelic	biallelic	4	1	19	TRIM28	58544064	58550722	tripartite motif containing 28 [Source:HGNC Symbol;Acc:HGNC:16384]	no	no	no	no
chr19	ENSG00000131845	biallelic	biallelic		monoallelic	biallelic	biallelic	4	1	19	ZNF304	57351271	57359898	zinc finger protein 304 [Source:HGNC Symbol;Acc:HGNC:13505]	no	no	no	no
chr19	ENSG00000142541	biallelic	biallelic				monoallelic	2	1	19	RPL13A	49487510	49493057	ribosomal protein L13a [Source:HGNC Symbol;Acc:HGNC:10304]	no	no	no	no
chr19	ENSG00000159882	biallelic	monoallelic	biallelic	biallelic	biallelic	biallelic	5	1	19	ZNF230	44002957	44013924	zinc finger protein 230 [Source:HGNC Symbol;Acc:HGNC:13024]	no	no	no	no
chr19	ENSG00000159917	monoallelic						0	1	19	ZNF235	44228729	44305046	zinc finger protein 235 [Source:HGNC Symbol;Acc:HGNC:12866]	no	no	no	no
chr19	ENSG00000167755	biallelic		biallelic	monoallelic			2	1	19	KLK6	50958631	50969673	kallikrein related peptidase 6 [Source:HGNC Symbol;Acc:HGNC:6367]	no	no	no	no
chr19	ENSG00000171574	monoallelic	biallelic			biallelic	biallelic	3	1	19	ZNF584	58401504	58431736	zinc finger protein 584 [Source:HGNC Symbol;Acc:HGNC:27318]	no	no	no	no
chr19	ENSG00000186838	monoallelic						0	1	19	SELENOV	39515139	39520675	selenoprotein V [Source:HGNC Symbol;Acc:HGNC:30399]	no	no	no	no
chr19	ENSG00000188171	biallelic	biallelic	monoallelic				2	1	19	ZNF626	20619939	20661596	zinc finger protein 626 [Source:HGNC Symbol;Acc:HGNC:30461]	no	no	no	no
chr19	ENSG00000196109	biallelic	biallelic	monoallelic	biallelic	biallelic	biallelic	5	1	19	ZNF676	22179089	22215801	zinc finger protein 676 [Source:HGNC Symbol;Acc:HGNC:20429]	no	no	no	no
chr19	ENSG00000197360	monoallelic						0	1	19	ZNF98	22391019	22532485	zinc finger protein 98 [Source:HGNC Symbol;Acc:HGNC:13174]	no	no	no	no
chr19	ENSG00000198153	monoallelic			biallelic		biallelic	2	1	19	ZNF849P	22685167	22686732	zinc finger protein 849, pseudogene [Source:HGNC Symbol;Acc:HGNC:34389]	no	no	no	no
chr19	ENSG00000205517	monoallelic	biallelic			biallelic		2	1	19	RGL3	11384341	11419328	ral guanine nucleotide dissociation stimulator like 3 [Source:HGNC Symbol;Acc:HGNC:30282]	no	no	no	no
chr19	ENSG00000213973	monoallelic						0	1	19	ZNF99	22752183	22784151	zinc finger protein 99 [Source:HGNC Symbol;Acc:HGNC:13175]	no	no	no	no
chr19	ENSG00000226763	monoallelic						0	1	19	SRRM5	43596617	43614498	serine/arginine repetitive matrix 5 [Source:HGNC Symbol;Acc:HGNC:37248]	no	no	no	no
chr19	ENSG00000229676	monoallelic				biallelic	biallelic	2	1	19	ZNF492	22634324	22667671	zinc finger protein 492 [Source:HGNC Symbol;Acc:HGNC:23707]	no	no	no	no
chr19	ENSG00000237118	monoallelic		biallelic	biallelic			2	1	19	CYP2F2P	40818414	40826772	cytochrome P450 family 2 subfamily F member 2, pseudogene [Source:HGNC Symbol;Acc:HGNC:18851]	no	no	no	no
chr19	ENSG00000237440	biallelic	biallelic	monoallelic		biallelic	biallelic	4	1	19	ZNF737	20535825	20565809	zinc finger protein 737 [Source:HGNC Symbol;Acc:HGNC:32468]	no	no	no	no
chr19	ENSG00000267041	monoallelic		biallelic	biallelic			2	1	19	ZNF850	36714383	36772825	zinc finger protein 850 [Source:HGNC Symbol;Acc:HGNC:27994]	no	no	no	no
chr19	ENSG00000267673	monoallelic	biallelic			biallelic		2	1	19	FDX2	10309916	10316015	ferredoxin 2 [Source:HGNC Symbol;Acc:HGNC:30546]	no	no	no	no
chr19	ENSG00000267706	biallelic	biallelic	monoallelic				2	1	19		55352301	55359516	novel transcript	no	no	no	no
chr20	ENSG00000078814	monoallelic						0	1	20	MYH7B	34955810	35002437	myosin heavy chain 7B [Source:HGNC Symbol;Acc:HGNC:15906]	no	no	no	no
chr20	ENSG00000088340	biallelic	biallelic	monoallelic		biallelic	biallelic	4	1	20	FER1L4	35558737	35607562	fer-1 like family member 4 (pseudogene) [Source:HGNC Symbol;Acc:HGNC:15801]	no	no	no	no
chr20	ENSG00000088876	biallelic	monoallelic		biallelic			2	1	20	ZNF343	2481817	2524702	zinc finger protein 343 [Source:HGNC Symbol;Acc:HGNC:16017]	no	no	no	no
chr20	ENSG00000101160	monoallelic		biallelic	biallelic	biallelic	biallelic	4	1	20	CTSZ	58985686	59008238	cathepsin Z [Source:HGNC Symbol;Acc:HGNC:2547]	no	no	no	no
chr20	ENSG00000101457	biallelic	monoallelic					1	1	20	DNTTIP1	45791954	45811427	deoxynucleotidyltransferase terminal interacting protein 1 [Source:HGNC Symbol;Acc:HGNC:16160]	no	no	no	no
chr20	ENSG00000124092	biallelic	biallelic	monoallelic	biallelic			3	1	20	CTCFL	57495966	57525652	CCCTC-binding factor like [Source:HGNC Symbol;Acc:HGNC:16234]	no	no	no	no
chr20	ENSG00000124159	monoallelic	biallelic	biallelic	biallelic			3	1	20	MATN4	45293445	45308529	matrilin 4 [Source:HGNC Symbol;Acc:HGNC:6910]	no	no	no	no
chr20	ENSG00000124181	biallelic	biallelic		monoallelic	biallelic	biallelic	4	1	20	PLCG1	41136960	41196801	phospholipase C gamma 1 [Source:HGNC Symbol;Acc:HGNC:9065]	no	no	no	no
chr20	ENSG00000174403	monoallelic	biallelic					1	1	20	CRMA	62544165	62551526	cardiomyocyte maturation associated lncRNA [Source:HGNC Symbol;Acc:HGNC:26393]	no	no	no	no
chr20	ENSG00000196562	monoallelic		biallelic	biallelic			2	1	20	SULF2	47656197	47786616	sulfatase 2 [Source:HGNC Symbol;Acc:HGNC:20392]	no	no	no	no
chr20	ENSG00000197818	monoallelic						0	1	20	SLC9A8	49812713	49892242	solute carrier family 9 member A8 [Source:HGNC Symbol;Acc:HGNC:20728]	no	no	no	no
chr21	ENSG00000160208	biallelic	biallelic				monoallelic	2	1	21	RRP1B	43659560	43696079	ribosomal RNA processing 1B [Source:HGNC Symbol;Acc:HGNC:23818]	no	no	no	no
chr21	ENSG00000160284	biallelic	biallelic		monoallelic			2	1	21	SPATC1L	46161148	46184476	spermatogenesis and centriole associated 1 like [Source:HGNC Symbol;Acc:HGNC:1298]	no	no	no	no
chr21	ENSG00000173638	biallelic	biallelic	biallelic	biallelic		monoallelic	4	1	21	SLC19A1	45493572	45573365	solute carrier family 19 member 1 [Source:HGNC Symbol;Acc:HGNC:10937]	no	no	no	no
chr21	ENSG00000184012	biallelic	biallelic	monoallelic	biallelic			3	1	21	TMPRSS2	41464300	41531116	transmembrane serine protease 2 [Source:HGNC Symbol;Acc:HGNC:11876]	no	no	no	no
chr22	ENSG00000073146	monoallelic				biallelic	biallelic	2	1	22	MOV10L1	50089879	50161690	Mov10 like RISC complex RNA helicase 1 [Source:HGNC Symbol;Acc:HGNC:7201]	no	no	no	no
chr22	ENSG00000100058	monoallelic	biallelic					1	1	22	CRYBB2P1	25455712	25459681	crystallin beta B2 pseudogene 1 [Source:HGNC Symbol;Acc:HGNC:2399]	no	no	no	no
chr22	ENSG00000100084	monoallelic						0	1	22	HIRA	19330698	19447450	histone cell cycle regulator [Source:HGNC Symbol;Acc:HGNC:4916]	no	no	no	no
chr22	ENSG00000100300	biallelic	biallelic	biallelic	biallelic	monoallelic		4	1	22	TSPO	43151547	43163242	translocator protein [Source:HGNC Symbol;Acc:HGNC:1158]	no	no	no	no
chr22	ENSG00000128394	biallelic	biallelic				monoallelic	2	1	22	APOBEC3F	39040604	39055972	apolipoprotein B mRNA editing enzyme catalytic subunit 3F [Source:HGNC Symbol;Acc:HGNC:17356]	no	no	no	no
chr22	ENSG00000179750	monoallelic	biallelic	biallelic	biallelic	biallelic	biallelic	5	1	22	APOBEC3B	38982347	38992804	apolipoprotein B mRNA editing enzyme catalytic subunit 3B [Source:HGNC Symbol;Acc:HGNC:17352]	no	no	no	no
chr22	ENSG00000184113	monoallelic						0	1	22	CLDN5	19523024	19527545	claudin 5 [Source:HGNC Symbol;Acc:HGNC:2047]	no	no	no	no
chr22	ENSG00000184436	biallelic	biallelic	monoallelic		biallelic	biallelic	4	1	22	THAP7	20999104	21002196	THAP domain containing 7 [Source:HGNC Symbol;Acc:HGNC:23190]	no	no	no	no
chr22	ENSG00000185340	biallelic	biallelic	monoallelic		biallelic	biallelic	4	1	22	GAS2L1	29306618	29312787	growth arrest specific 2 like 1 [Source:HGNC Symbol;Acc:HGNC:16955]	no	no	no	no
chrX	ENSG00000198455	monoallelic						0	1	X	ZXDB	57592011	57597477	zinc finger X-linked duplicated B [Source:HGNC Symbol;Acc:HGNC:13199]	no	no	no	no
chrX	ENSG00000198934	monoallelic						0	1	X	MAGEE1	76427710	76431342	MAGE family member E1 [Source:HGNC Symbol;Acc:HGNC:24934]	no	no	yes	no
chr1	ENSG00000134686		monoallelic			biallelic	biallelic	2	1	1	PHC2	33323623	33431095	polyhomeotic homolog 2 [Source:HGNC Symbol;Acc:HGNC:3183]	no	no	no	no
chr1	ENSG00000177000		monoallelic	biallelic	biallelic	biallelic	biallelic	4	1	1	MTHFR	11785723	11806455	methylenetetrahydrofolate reductase [Source:HGNC Symbol;Acc:HGNC:7436]	no	no	no	no
chr1	ENSG00000214837		monoallelic	biallelic	biallelic			2	1	1	LINC01347	243087710	243097299	long intergenic non-protein coding RNA 1347 [Source:HGNC Symbol;Acc:HGNC:50566]	no	no	no	no
chr1	ENSG00000268043		monoallelic	biallelic	biallelic	biallelic	biallelic	4	1	1	NBPF12	146938324	146996202	NBPF member 12 [Source:HGNC Symbol;Acc:HGNC:24297]	no	no	no	no
chr1	ENSG00000287356		monoallelic					0	1	1		2315040	2323085	novel transcript, antisense to MORN1	no	no	no	no
chr2	ENSG00000123612		monoallelic	biallelic	biallelic			2	1	2	ACVR1C	157526767	157628864	activin A receptor type 1C [Source:HGNC Symbol;Acc:HGNC:18123]	no	no	no	no
chr2	ENSG00000153107		monoallelic		biallelic			1	1	2	ANAPC1	111611639	111884690	anaphase promoting complex subunit 1 [Source:HGNC Symbol;Acc:HGNC:19988]	no	no	no	no
chr2	ENSG00000204253		monoallelic					0	1	2	HNRNPCP2	189923336	189924216	heterogeneous nuclear ribonucleoprotein C pseudogene 2 [Source:HGNC Symbol;Acc:HGNC:48814]	no	no	no	no
chr3	ENSG00000076242		monoallelic	biallelic	biallelic	biallelic	biallelic	4	1	3	MLH1	36993350	37050846	mutL homolog 1 [Source:HGNC Symbol;Acc:HGNC:7127]	no	no	no	no
chr3	ENSG00000093217		monoallelic					0	1	3	XYLB	38346760	38421348	xylulokinase [Source:HGNC Symbol;Acc:HGNC:12839]	no	no	no	no
chr3	ENSG00000164062		monoallelic					0	1	3	APEH	49674014	49683971	acylaminoacyl-peptide hydrolase [Source:HGNC Symbol;Acc:HGNC:586]	no	no	no	no
chr3	ENSG00000164080		monoallelic	biallelic	biallelic			2	1	3	RAD54L2	51538719	51668667	RAD54 like 2 [Source:HGNC Symbol;Acc:HGNC:29123]	no	no	no	no
chr3	ENSG00000173402		monoallelic					0	1	3	DAG1	49468713	49535618	dystroglycan 1 [Source:HGNC Symbol;Acc:HGNC:2666]	no	no	no	no
chr3	ENSG00000178252		monoallelic			biallelic	biallelic	2	1	3	WDR6	49007062	49015953	WD repeat domain 6 [Source:HGNC Symbol;Acc:HGNC:12758]	no	no	no	no
chr3	ENSG00000180914		biallelic	monoallelic				1	1	3	OXTR	8750381	8769628	oxytocin receptor [Source:HGNC Symbol;Acc:HGNC:8529]	no	no	no	no
chr3	ENSG00000187118		monoallelic					0	1	3	CMC1	28241584	28325142	C-X9-C motif containing 1 [Source:HGNC Symbol;Acc:HGNC:28783]	no	no	no	no
chr5	ENSG00000120324		monoallelic	biallelic				1	1	5	PCDHB10	141192353	141195647	protocadherin beta 10 [Source:HGNC Symbol;Acc:HGNC:8681]	no	no	no	no
chr5	ENSG00000145934		biallelic	biallelic	monoallelic		biallelic	3	1	5	TENM2	166979029	168264157	teneurin transmembrane protein 2 [Source:HGNC Symbol;Acc:HGNC:29943]	no	no	no	no
chr6	ENSG00000173214		monoallelic					0	1	6	MFSD4B	111259327	111445354	major facilitator superfamily domain containing 4B [Source:HGNC Symbol;Acc:HGNC:21053]	no	no	no	no
chr7	ENSG00000105792		monoallelic					0	1	7	CFAP69	90245174	90311063	cilia and flagella associated protein 69 [Source:HGNC Symbol;Acc:HGNC:26107]	no	no	no	no
chr7	ENSG00000146904		monoallelic	biallelic	biallelic			2	1	7	EPHA1	143390289	143408856	EPH receptor A1 [Source:HGNC Symbol;Acc:HGNC:3385]	no	no	no	no
chr7	ENSG00000164647		monoallelic					0	1	7	STEAP1	90154456	90164829	STEAP family member 1 [Source:HGNC Symbol;Acc:HGNC:11378]	no	no	no	no
chr7	ENSG00000256646		monoallelic					0	1	7		42909273	42932214	novel PSMA2 and C7orf25 readthrough	no	no	no	no
chr8	ENSG00000160957		monoallelic	biallelic	biallelic	biallelic	biallelic	4	1	8	RECQL4	144511288	144517845	RecQ like helicase 4 [Source:HGNC Symbol;Acc:HGNC:9949]	no	no	no	no
chr8	ENSG00000171045		monoallelic	biallelic	biallelic	biallelic	biallelic	4	1	8	TSNARE1	142212080	142403182	t-SNARE domain containing 1 [Source:HGNC Symbol;Acc:HGNC:26437]	no	no	no	no
chr8	ENSG00000187840		monoallelic					0	1	8	EIF4EBP1	38030534	38060365	eukaryotic translation initiation factor 4E binding protein 1 [Source:HGNC Symbol;Acc:HGNC:3288]	no	no	no	no
chr9	ENSG00000095380		monoallelic	biallelic	biallelic	biallelic	biallelic	4	1	9	NANS	98056732	98083077	N-acetylneuraminate synthase [Source:HGNC Symbol;Acc:HGNC:19237]	no	no	no	no
chr9	ENSG00000170161		biallelic	biallelic	monoallelic			2	1	9	FAM88B	62897368	62900104	family with sequence similarity 88 member B [Source:HGNC Symbol;Acc:HGNC:31457]	no	no	no	no
chr9	ENSG00000198000		monoallelic	biallelic	biallelic	biallelic	biallelic	4	1	9	NOL8	92297358	92325636	nucleolar protein 8 [Source:HGNC Symbol;Acc:HGNC:23387]	no	no	no	no
chr10	ENSG00000165868		monoallelic				biallelic	1	1	10	HSPA12A	116671192	116850251	heat shock protein family A (Hsp70) member 12A [Source:HGNC Symbol;Acc:HGNC:19022]	no	no	no	no
chr11	ENSG00000166788		monoallelic			biallelic	biallelic	2	1	11	SAAL1	18069935	18106087	serum amyloid A like 1 [Source:HGNC Symbol;Acc:HGNC:25158]	no	no	no	no
chr11	ENSG00000172613		monoallelic	biallelic	biallelic			2	1	11	RAD9A	67317871	67398410	RAD9 checkpoint clamp component A [Source:HGNC Symbol;Acc:HGNC:9827]	no	no	no	no
chr12	ENSG00000139350		monoallelic	biallelic	biallelic		biallelic	3	1	12	NEDD1	96907224	96953780	NEDD1 gamma-tubulin ring complex targeting factor [Source:HGNC Symbol;Acc:HGNC:7723]	no	no	no	no
chr12	ENSG00000151176		monoallelic	biallelic	biallelic	biallelic		3	1	12	PLBD2	113358566	113391629	phospholipase B domain containing 2 [Source:HGNC Symbol;Acc:HGNC:27283]	no	no	no	no
chr13	ENSG00000123200		monoallelic			biallelic	biallelic	2	1	13	ZC3H13	45954465	46052759	zinc finger CCCH-type containing 13 [Source:HGNC Symbol;Acc:HGNC:20368]	no	no	no	no
chr13	ENSG00000133101		monoallelic					0	1	13	CCNA1	36431520	36442870	cyclin A1 [Source:HGNC Symbol;Acc:HGNC:1577]	no	no	no	no
chr13	ENSG00000165475		biallelic		monoallelic			1	1	13	CRYL1	20403666	20525873	crystallin lambda 1 [Source:HGNC Symbol;Acc:HGNC:18246]	no	no	no	no
chr13	ENSG00000281883		monoallelic					0	1	13		43883800	44028526	novel transcript	no	no	no	no
chr15	ENSG00000188388		monoallelic					0	1	15	GOLGA6L3	85240472	85247170	golgin A6 family like 3 [Source:HGNC Symbol;Acc:HGNC:37441]	no	no	no	no
chr15	ENSG00000189136		monoallelic			biallelic		1	1	15	UBE2Q2P1	84526781	84570700	UBE2Q2 pseudogene 1 [Source:HGNC Symbol;Acc:HGNC:37439]	no	no	no	no
chr15	ENSG00000230373		monoallelic					0	1	15	GOLGA6L5P	84509926	84516785	golgin A6 family like 5, pseudogene [Source:HGNC Symbol;Acc:HGNC:30472]	no	no	no	no
chr15	ENSG00000255769		monoallelic			biallelic	biallelic	2	1	15	GOLGA2P10	82476498	82477926	GOLGA2 pseudogene 10 [Source:HGNC Symbol;Acc:HGNC:26229]	no	no	no	no
chr16	ENSG00000131143		monoallelic					0	1	16	COX4I1	85798633	85807068	cytochrome c oxidase subunit 4I1 [Source:HGNC Symbol;Acc:HGNC:2265]	no	no	no	no
chr16	ENSG00000140945		monoallelic					0	1	16	CDH13	82626965	83800640	cadherin 13 [Source:HGNC Symbol;Acc:HGNC:1753]	no	no	no	no
chr16	ENSG00000172366		monoallelic					0	1	16	MCRIP2	636817	648474	MAPK regulated corepressor interacting protein 2 [Source:HGNC Symbol;Acc:HGNC:14142]	no	no	no	no
chr16	ENSG00000263072		monoallelic					0	1	16	ZNF213-AS1	3100696	3143734	ZNF213 antisense RNA 1 (head to head) [Source:HGNC Symbol;Acc:HGNC:50505]	no	no	no	no
chr17	ENSG00000129197		monoallelic					0	1	17	RPAIN	5419641	5432877	RPA interacting protein [Source:HGNC Symbol;Acc:HGNC:28641]	no	no	no	no
chr17	ENSG00000154945		biallelic			monoallelic		1	1	17	ANKRD40	50693198	50707914	ankyrin repeat domain 40 [Source:HGNC Symbol;Acc:HGNC:28233]	no	no	no	no
chr17	ENSG00000170037		monoallelic					0	1	17	CNTROB	7932101	7949920	centrobin, centriole duplication and spindle assembly protein [Source:HGNC Symbol;Acc:HGNC:29616]	no	no	no	no
chr17	ENSG00000261499		monoallelic					0	1	17		36274191	36320547	aminopeptidase puromycin sensitive (NPEPPS) pseudogene	no	no	no	no
chr19	ENSG00000153896		monoallelic					0	1	19	ZNF599	34758073	34773229	zinc finger protein 599 [Source:HGNC Symbol;Acc:HGNC:26408]	no	no	no	no
chr19	ENSG00000169021		monoallelic					0	1	19	UQCRFS1	29205320	29213151	ubiquinol-cytochrome c reductase, Rieske iron-sulfur polypeptide 1 [Source:HGNC Symbol;Acc:HGNC:12587]	no	no	no	no
chr19	ENSG00000187550		monoallelic	biallelic	biallelic			2	1	19	SBK2	55528611	55537133	SH3 domain binding kinase family member 2 [Source:HGNC Symbol;Acc:HGNC:34416]	no	no	no	no
chr19	ENSG00000196172		monoallelic	biallelic	biallelic	biallelic	biallelic	4	1	19	ZNF681	23739195	23758891	zinc finger protein 681 [Source:HGNC Symbol;Acc:HGNC:26457]	no	no	no	no
chr20	ENSG00000132825		monoallelic					0	1	20	PPP1R3D	59936663	59940305	protein phosphatase 1 regulatory subunit 3D [Source:HGNC Symbol;Acc:HGNC:9294]	no	no	no	no
chr20	ENSG00000275457		monoallelic					0	1	20		21302731	21303704	novel transcript, antisense to XRN2	no	no	no	no
chr22	ENSG00000099889		monoallelic			biallelic	biallelic	2	1	22	ARVCF	19969896	20016823	ARVCF delta catenin family member [Source:HGNC Symbol;Acc:HGNC:728]	no	no	no	no
chr22	ENSG00000100162		monoallelic					0	1	22	CENPM	41938737	41947152	centromere protein M [Source:HGNC Symbol;Acc:HGNC:18352]	no	no	no	no
chr22	ENSG00000205853		monoallelic					0	1	22	RFPL3S	32359886	32382106	RFPL3 antisense [Source:HGNC Symbol;Acc:HGNC:9981]	no	no	no	no
chrX	ENSG00000102225		monoallelic					0	1	X	CDK16	47217860	47229997	cyclin dependent kinase 16 [Source:HGNC Symbol;Acc:HGNC:8749]	no	yes	no	no
chrX	ENSG00000204131		monoallelic					0	1	X	NHSL2	71910845	72161750	NHS like 2 [Source:HGNC Symbol;Acc:HGNC:33737]	no	no	yes	no
chr1	ENSG00000086619			biallelic	biallelic		monoallelic	2	1	1	ERO1B	236214681	236282019	endoplasmic reticulum oxidoreductase 1 beta [Source:HGNC Symbol;Acc:HGNC:14355]	no	no	no	no
chr1	ENSG00000116685			monoallelic		biallelic	biallelic	2	1	1	KIAA2013	11919591	11926428	KIAA2013 [Source:HGNC Symbol;Acc:HGNC:28513]	no	no	no	no
chr1	ENSG00000123685			monoallelic	biallelic			1	1	1	BATF3	212686417	212699840	basic leucine zipper ATF-like transcription factor 3 [Source:HGNC Symbol;Acc:HGNC:28915]	no	no	no	no
chr1	ENSG00000135763			monoallelic		biallelic	biallelic	2	1	1	URB2	229626247	229660200	URB2 ribosome biogenesis homolog [Source:HGNC Symbol;Acc:HGNC:28967]	no	no	no	no
chr1	ENSG00000163125			monoallelic				0	1	1	RPRD2	150363091	150476566	regulation of nuclear pre-mRNA domain containing 2 [Source:HGNC Symbol;Acc:HGNC:29039]	no	no	no	no
chr1	ENSG00000198892			monoallelic				0	1	1	SHISA4	201888680	201892587	shisa family member 4 [Source:HGNC Symbol;Acc:HGNC:27139]	no	no	no	no
chr1	ENSG00000204084			biallelic	biallelic		monoallelic	2	1	1	INPP5B	37860697	37947057	inositol polyphosphate-5-phosphatase B [Source:HGNC Symbol;Acc:HGNC:6077]	no	no	no	no
chr1	ENSG00000268903			biallelic		monoallelic	biallelic	2	1	1		135141	135895	novel pseudogene	no	no	no	no
chr2	ENSG00000079156			biallelic	monoallelic			1	1	2	OSBPL6	178194481	178402893	oxysterol binding protein like 6 [Source:HGNC Symbol;Acc:HGNC:16388]	no	no	no	no
chr2	ENSG00000115363			monoallelic				0	1	2	EVA1A	75469302	75569722	eva-1 homolog A, regulator of programmed cell death [Source:HGNC Symbol;Acc:HGNC:25816]	no	no	no	no
chr2	ENSG00000162976			monoallelic	biallelic	biallelic	biallelic	3	1	2	SLC66A3	11155198	11178870	solute carrier family 66 member 3 [Source:HGNC Symbol;Acc:HGNC:28503]	no	no	no	no
chr2	ENSG00000222020			monoallelic	biallelic	biallelic		2	1	2	HDAC4-AS1	239401436	239402657	HDAC4 antisense RNA 1 [Source:HGNC Symbol;Acc:HGNC:54064]	no	no	no	no
chr3	ENSG00000196542			monoallelic				0	1	3	SPTSSB	161344798	161372880	serine palmitoyltransferase small subunit B [Source:HGNC Symbol;Acc:HGNC:24045]	no	no	no	no
chr3	ENSG00000227124			monoallelic		biallelic	biallelic	2	1	3	ZNF717	75678660	75785583	zinc finger protein 717 [Source:HGNC Symbol;Acc:HGNC:29448]	no	no	no	no
chr4	ENSG00000171566			biallelic	biallelic		monoallelic	2	1	4	PLRG1	154535005	154550400	pleiotropic regulator 1 [Source:HGNC Symbol;Acc:HGNC:9089]	no	no	no	no
chr5	ENSG00000113212			monoallelic				0	1	5	PCDHB7	141172644	141176383	protocadherin beta 7 [Source:HGNC Symbol;Acc:HGNC:8692]	no	no	no	no
chr5	ENSG00000169131			monoallelic				0	1	5	ZNF354A	178711512	178730659	zinc finger protein 354A [Source:HGNC Symbol;Acc:HGNC:11628]	no	no	no	no
chr5	ENSG00000184347			monoallelic				0	1	5	SLIT3	168661733	169301139	slit guidance ligand 3 [Source:HGNC Symbol;Acc:HGNC:11087]	no	no	no	no
chr6	ENSG00000057663			monoallelic				0	1	6	ATG5	106045423	106325791	autophagy related 5 [Source:HGNC Symbol;Acc:HGNC:589]	no	no	no	no
chr6	ENSG00000096080			monoallelic				0	1	6	MRPS18A	43671202	43687791	mitochondrial ribosomal protein S18A [Source:HGNC Symbol;Acc:HGNC:14515]	no	no	no	no
chr6	ENSG00000164442			biallelic	biallelic		monoallelic	2	1	6	CITED2	139371807	139374648	Cbp/p300 interacting transactivator with Glu/Asp rich carboxy-terminal domain 2 [Source:HGNC Symbol;Acc:HGNC:1987]	no	no	no	no
chr6	ENSG00000204657			biallelic	monoallelic	biallelic	biallelic	3	1	6	OR2H2	29585121	29590500	olfactory receptor family 2 subfamily H member 2 [Source:HGNC Symbol;Acc:HGNC:8253]	no	no	no	no
chr6	ENSG00000214922			biallelic	monoallelic			1	1	6	HLA-F-AS1	29726601	29749049	HLA-F antisense RNA 1 [Source:HGNC Symbol;Acc:HGNC:26645]	no	no	no	no
chr7	ENSG00000106028			biallelic	biallelic		monoallelic	2	1	7	SSBP1	141738334	141787922	single stranded DNA binding protein 1 [Source:HGNC Symbol;Acc:HGNC:11317]	no	no	no	no
chr7	ENSG00000164742			biallelic	biallelic	monoallelic		2	1	7	ADCY1	45574140	45723116	adenylate cyclase 1 [Source:HGNC Symbol;Acc:HGNC:232]	no	no	no	no
chr7	ENSG00000188185			biallelic			monoallelic	1	1	7	LINC00265	39733430	39793092	long intergenic non-protein coding RNA 265 [Source:HGNC Symbol;Acc:HGNC:28019]	no	no	no	no
chr7	ENSG00000189077			monoallelic				0	1	7	TMEM120A	75986831	75994656	transmembrane protein 120A [Source:HGNC Symbol;Acc:HGNC:21697]	no	no	no	no
chr7	ENSG00000198580			monoallelic	biallelic			1	1	7		6673494	6676366	zinc finger protein pseudogene	no	no	no	no
chr7	ENSG00000235314			monoallelic				0	1	7	LINC00957	44039171	44042306	long intergenic non-protein coding RNA 957 [Source:HGNC Symbol;Acc:HGNC:22332]	no	no	no	no
chr7	ENSG00000241644			monoallelic	biallelic	biallelic	biallelic	3	1	7	INMT	30697985	30757602	indolethylamine N-methyltransferase [Source:HGNC Symbol;Acc:HGNC:6069]	no	no	no	no
chr7	ENSG00000244693			monoallelic				0	1
chr8	ENSG00000147654			monoallelic				0	1	8	EBAG9	109539711	109570072	estrogen receptor binding site associated antigen 9 [Source:HGNC Symbol;Acc:HGNC:3123]	no	no	no	no
chr8	ENSG00000147804			monoallelic	biallelic	biallelic	biallelic	3	1	8	SLC39A4	144409742	144416844	solute carrier family 39 member 4 [Source:HGNC Symbol;Acc:HGNC:17129]	no	no	no	no
chr8	ENSG00000197363			biallelic	monoallelic	biallelic	biallelic	3	1	8	ZNF517	144798876	144811169	zinc finger protein 517 [Source:HGNC Symbol;Acc:HGNC:27984]	no	no	no	no
chr8	ENSG00000223508			monoallelic		biallelic	biallelic	2	1	8	RPL23AP53	213186	232231	ribosomal protein L23a pseudogene 53 [Source:HGNC Symbol;Acc:HGNC:35921]	no	no	no	no
chr8	ENSG00000250305			monoallelic	biallelic	biallelic	biallelic	3	1	8	TRMT9B	12945642	13031503	tRNA methyltransferase 9B (putative) [Source:HGNC Symbol;Acc:HGNC:26725]	no	no	no	no
chr8	ENSG00000253200			monoallelic				0	1	8		22613908	22616657	novel transcript, antisense to KIAA1967	no	no	no	no
chr9	ENSG00000215187			monoallelic				0	1	9	FAM166B	35561831	35563899	family with sequence similarity 166 member B [Source:HGNC Symbol;Acc:HGNC:34242]	no	no	no	no
chr10	ENSG00000108021			biallelic	biallelic	monoallelic		2	1	10	TASOR2	5684731	5763779	transcription activation suppressor family member 2 [Source:HGNC Symbol;Acc:HGNC:23484]	no	no	no	no
chr10	ENSG00000138326			biallelic	monoallelic			1	1	10	RPS24	78033760	78056813	ribosomal protein S24 [Source:HGNC Symbol;Acc:HGNC:10411]	no	no	no	no
chr10	ENSG00000148835			monoallelic	biallelic	biallelic	biallelic	3	1	10	TAF5	103367966	103389065	TATA-box binding protein associated factor 5 [Source:HGNC Symbol;Acc:HGNC:11539]	no	no	no	no
chr10	ENSG00000198825			monoallelic	biallelic			1	1	10	INPP5F	119726042	119829147	inositol polyphosphate-5-phosphatase F [Source:HGNC Symbol;Acc:HGNC:17054]	no	no	no	no
chr10	ENSG00000198879			biallelic	biallelic	monoallelic		2	1	10	SFMBT2	7158624	7411488	Scm like with four mbt domains 2 [Source:HGNC Symbol;Acc:HGNC:20256]	no	no	no	no
chr11	ENSG00000099834			monoallelic	biallelic			1	1	11	CDHR5	616577	626078	cadherin related family member 5 [Source:HGNC Symbol;Acc:HGNC:7521]	no	no	no	no
chr11	ENSG00000129757			monoallelic	biallelic			1	1	11	CDKN1C	2883213	2885775	cyclin dependent kinase inhibitor 1C [Source:HGNC Symbol;Acc:HGNC:1786]	no	no	no	no
chr11	ENSG00000166478			monoallelic				0	1	11	ZNF143	9460319	9528524	zinc finger protein 143 [Source:HGNC Symbol;Acc:HGNC:12928]	no	no	no	no
chr11	ENSG00000167985			biallelic			monoallelic	1	1	11	SDHAF2	61430042	61446733	succinate dehydrogenase complex assembly factor 2 [Source:HGNC Symbol;Acc:HGNC:26034]	no	no	no	no
chr11	ENSG00000173465			biallelic	biallelic	monoallelic		2	1	11	ZNRD2	65570460	65573942	zinc ribbon domain containing 2 [Source:HGNC Symbol;Acc:HGNC:11328]	no	no	no	no
chr11	ENSG00000186104			biallelic	monoallelic			1	1	11	CYP2R1	14877440	14892231	cytochrome P450 family 2 subfamily R member 1 [Source:HGNC Symbol;Acc:HGNC:20580]	no	no	no	no
chr11	ENSG00000188162			biallelic	biallelic	biallelic	monoallelic	3	1	11	OTOG	17547259	17647150	otogelin [Source:HGNC Symbol;Acc:HGNC:8516]	no	no	no	no
chr11	ENSG00000188487			monoallelic			biallelic	1	1	11	INSC	15112424	15247208	INSC spindle orientation adaptor protein [Source:HGNC Symbol;Acc:HGNC:33116]	no	no	no	no
chr12	ENSG00000010219			monoallelic			biallelic	1	1	12	DYRK4	4562208	4615302	dual specificity tyrosine phosphorylation regulated kinase 4 [Source:HGNC Symbol;Acc:HGNC:3095]	no	no	no	no
chr12	ENSG00000111711			monoallelic				0	1	12	GOLT1B	21501781	21518408	golgi transport 1B [Source:HGNC Symbol;Acc:HGNC:20175]	no	no	no	no
chr12	ENSG00000176383			monoallelic				0	1	12	B3GNT4	122203681	122208952	UDP-GlcNAc:betaGal beta-1,3-N-acetylglucosaminyltransferase 4 [Source:HGNC Symbol;Acc:HGNC:15683]	no	no	no	no
chr12	ENSG00000255837			monoallelic	biallelic			1	1	12	TAS2R20	10995961	10998304	taste 2 receptor member 20 [Source:HGNC Symbol;Acc:HGNC:19109]	no	no	no	no
chr12	ENSG00000284402			biallelic			monoallelic	1	1	12	MIR7107	121444273	121444352	microRNA 7107 [Source:HGNC Symbol;Acc:HGNC:50006]	no	no	no	no
chr13	ENSG00000242715			monoallelic	biallelic	biallelic	biallelic	3	1	13	CCDC169	36222008	36297840	coiled-coil domain containing 169 [Source:HGNC Symbol;Acc:HGNC:34361]	no	no	no	no
chr14	ENSG00000100664			monoallelic	biallelic	biallelic	biallelic	3	1	14	EIF5	103333544	103345025	eukaryotic translation initiation factor 5 [Source:HGNC Symbol;Acc:HGNC:3299]	no	no	no	no
chr15	ENSG00000073417			monoallelic				0	1	15	PDE8A	84980440	85139145	phosphodiesterase 8A [Source:HGNC Symbol;Acc:HGNC:8793]	no	no	no	no
chr16	ENSG00000153446			biallelic	biallelic	biallelic	monoallelic	3	1	16	C16orf89	5044122	5066110	chromosome 16 open reading frame 89 [Source:HGNC Symbol;Acc:HGNC:28687]	no	no	no	no
chr16	ENSG00000262587			biallelic	biallelic	biallelic	monoallelic	3	1	16		25031881	25058109	leucine carboxyl methyltransferase 1 (LCMT1) pseudogene	no	no	no	no
chr17	ENSG00000185829			monoallelic				0	1	17	ARL17A	46499780	46579695	ADP ribosylation factor like GTPase 17A [Source:HGNC Symbol;Acc:HGNC:24096]	no	no	no	no
chr17	ENSG00000187624			monoallelic				0	1	17	C17orf97	410325	431062	chromosome 17 open reading frame 97 [Source:HGNC Symbol;Acc:HGNC:33800]	no	no	no	no
chr19	ENSG00000105329			monoallelic	biallelic	biallelic	biallelic	3	1	19	TGFB1	41301587	41353922	transforming growth factor beta 1 [Source:HGNC Symbol;Acc:HGNC:11766]	no	no	no	no
chr19	ENSG00000161652			monoallelic	biallelic	biallelic	biallelic	3	1	19	IZUMO2	50152548	50163281	IZUMO family member 2 [Source:HGNC Symbol;Acc:HGNC:28518]	no	no	no	no
chr20	ENSG00000170373			monoallelic	biallelic			1	1	20	CST1	23747562	23751268	cystatin SN [Source:HGNC Symbol;Acc:HGNC:2473]	no	no	no	no
chr20	ENSG00000174306			monoallelic				0	1	20	ZHX3	41178448	41317731	zinc fingers and homeoboxes 3 [Source:HGNC Symbol;Acc:HGNC:15935]	no	no	no	no
chr20	ENSG00000185513			biallelic	monoallelic		biallelic	2	1	20	L3MBTL1	43489442	43550954	L3MBTL histone methyl-lysine binding protein 1 [Source:HGNC Symbol;Acc:HGNC:15905]	no	no	no	no
chr21	ENSG00000160255			monoallelic				0	1	21	ITGB2	44885953	44931989	integrin subunit beta 2 [Source:HGNC Symbol;Acc:HGNC:6155]	no	no	no	no
chr21	ENSG00000183778			biallelic	monoallelic	biallelic	biallelic	3	1	21	B3GALT5	39556442	39673137	beta-1,3-galactosyltransferase 5 [Source:HGNC Symbol;Acc:HGNC:920]	no	no	no	no
chr22	ENSG00000070413			biallelic	biallelic		monoallelic	2	1	22	DGCR2	19036282	19122454	DiGeorge syndrome critical region gene 2 [Source:HGNC Symbol;Acc:HGNC:2845]	no	no	no	no
chr22	ENSG00000100228			monoallelic				0	1	22	RAB36	23145366	23165663	RAB36, member RAS oncogene family [Source:HGNC Symbol;Acc:HGNC:9775]	no	no	no	no
chr22	ENSG00000128191			biallelic	biallelic	monoallelic		2	1	22	DGCR8	20080221	20111877	DGCR8 microprocessor complex subunit [Source:HGNC Symbol;Acc:HGNC:2847]	no	no	no	no
chr22	ENSG00000218537			monoallelic				0	1	22	MIF-AS1	23894426	23898930	MIF antisense RNA 1 [Source:HGNC Symbol;Acc:HGNC:27669]	no	no	no	no
chr22	ENSG00000239900			biallelic	monoallelic			1	1	22	ADSL	40346461	40390463	adenylosuccinate lyase [Source:HGNC Symbol;Acc:HGNC:291]	no	no	no	no
chrX	ENSG00000185825			monoallelic				0	1	X	BCAP31	153700492	153724565	B cell receptor associated protein 31 [Source:HGNC Symbol;Acc:HGNC:16695]	no	no	no	yes
chrX	ENSG00000242732			monoallelic				0	1	X	RTL5	72127110	72131915	retrotransposon Gag like 5 [Source:HGNC Symbol;Acc:HGNC:29430]	no	no	no	yes
chr1	ENSG00000116544				monoallelic			0	1	1	DLGAP3	34865436	34929650	DLG associated protein 3 [Source:HGNC Symbol;Acc:HGNC:30368]	no	no	no	no
chr1	ENSG00000143476				monoallelic			0	1	1	DTL	212035553	212107400	denticleless E3 ubiquitin protein ligase homolog [Source:HGNC Symbol;Acc:HGNC:30288]	no	no	no	no
chr1	ENSG00000185483				monoallelic	biallelic	biallelic	2	1	1	ROR1	63774017	64181498	receptor tyrosine kinase like orphan receptor 1 [Source:HGNC Symbol;Acc:HGNC:10256]	no	no	no	no
chr1	ENSG00000228192				monoallelic			0	1	1	ZNF691-DT	42832522	42846427	ZNF691 divergent transcript [Source:HGNC Symbol;Acc:HGNC:55800]	no	no	no	no
chr2	ENSG00000081479				monoallelic			0	1	2	LRP2	169127109	169362534	LDL receptor related protein 2 [Source:HGNC Symbol;Acc:HGNC:6694]	no	no	no	no
chr2	ENSG00000095002				monoallelic			0	1	2	MSH2	47403067	47663146	mutS homolog 2 [Source:HGNC Symbol;Acc:HGNC:7325]	no	no	no	no
chr2	ENSG00000115694				monoallelic	biallelic	biallelic	2	1	2	STK25	241492670	241509730	serine/threonine kinase 25 [Source:HGNC Symbol;Acc:HGNC:11404]	no	no	no	no
chr2	ENSG00000144320				monoallelic			0	1	2	LNPK	175923882	176002839	lunapark, ER junction formation factor [Source:HGNC Symbol;Acc:HGNC:21610]	no	no	no	no
chr2	ENSG00000169629				biallelic	monoallelic		1	1	2	RGPD8	112368369	112434488	RANBP2 like and GRIP domain containing 8 [Source:HGNC Symbol;Acc:HGNC:9849]	no	no	no	no
chr2	ENSG00000173960				monoallelic			0	1	2	UBXN2A	23927285	24004909	UBX domain protein 2A [Source:HGNC Symbol;Acc:HGNC:27265]	no	no	no	no
chr2	ENSG00000178752				monoallelic			0	1	2	ERFE	238158970	238168900	erythroferrone [Source:HGNC Symbol;Acc:HGNC:26727]	no	no	no	no
chr3	ENSG00000076201				monoallelic	biallelic	biallelic	2	1	3	PTPN23	47381011	47413435	protein tyrosine phosphatase non-receptor type 23 [Source:HGNC Symbol;Acc:HGNC:14406]	no	no	no	no
chr3	ENSG00000082781				monoallelic			0	1	3	ITGB5	124761948	124901418	integrin subunit beta 5 [Source:HGNC Symbol;Acc:HGNC:6160]	no	no	no	no
chr3	ENSG00000233885				monoallelic			0	1	3	YEATS2-AS1	183806457	183810783	YEATS2 antisense RNA 1 [Source:HGNC Symbol;Acc:HGNC:41101]	no	no	no	no
chr3	ENSG00000234851				monoallelic			0	1	3	RPL23AP42	161429127	161429597	ribosomal protein L23a pseudogene 42 [Source:HGNC Symbol;Acc:HGNC:35942]	no	no	no	no
chr5	ENSG00000113552				monoallelic	biallelic	biallelic	2	1	5	GNPDA1	141991749	142013041	glucosamine-6-phosphate deaminase 1 [Source:HGNC Symbol;Acc:HGNC:4417]	no	no	no	no
chr5	ENSG00000204677				monoallelic			0	1	5	FAM153CP	178006348	178086529	family with sequence similarity 153 member C, pseudogene [Source:HGNC Symbol;Acc:HGNC:33936]	no	no	no	no
chr6	ENSG00000204390				biallelic	monoallelic	biallelic	2	1	6	HSPA1L	31809619	31815283	heat shock protein family A (Hsp70) member 1 like [Source:HGNC Symbol;Acc:HGNC:5234]	no	no	no	no
chr6	ENSG00000204498				monoallelic	biallelic	biallelic	2	1	6	NFKBIL1	31546870	31558829	NFKB inhibitor like 1 [Source:HGNC Symbol;Acc:HGNC:7800]	no	no	no	no
chr6	ENSG00000216819				monoallelic			0	1	6	TUBB2BP1	3177044	3179764	tubulin beta 2B class IIb pseudogene 1 [Source:HGNC Symbol;Acc:HGNC:42332]	no	no	no	no
chr6	ENSG00000216977				monoallelic			0	1	6	RPL21P65	106642463	106642928	ribosomal protein L21 pseudogene 65 [Source:HGNC Symbol;Acc:HGNC:36017]	no	no	no	no
chr6	ENSG00000218358				biallelic	monoallelic		1	1	6	RAET1K	150000090	150005157	retinoic acid early transcript 1K pseudogene [Source:HGNC Symbol;Acc:HGNC:16797]	no	no	no	no
chr7	ENSG00000122566				biallelic	monoallelic		1	1	7	HNRNPA2B1	26171151	26201529	heterogeneous nuclear ribonucleoprotein A2/B1 [Source:HGNC Symbol;Acc:HGNC:5033]	no	no	no	no
chr8	ENSG00000168495				monoallelic			0	1	8	POLR3D	22245133	22254601	RNA polymerase III subunit D [Source:HGNC Symbol;Acc:HGNC:1080]	no	no	no	no
chr8	ENSG00000254548				monoallelic			0	1	8		143718246	143718891	novel transcript	no	no	no	no
chr9	ENSG00000136802				monoallelic	biallelic	biallelic	2	1	9	LRRC8A	128882133	128918039	leucine rich repeat containing 8 VRAC subunit A [Source:HGNC Symbol;Acc:HGNC:19027]	no	no	no	no
chr9	ENSG00000180071				monoallelic			0	1	9	ANKRD18A	38540567	38620596	ankyrin repeat domain 18A [Source:HGNC Symbol;Acc:HGNC:23643]	no	no	no	no
chr10	ENSG00000198682				monoallelic			0	1	10	PAPSS2	87659613	87747705	3'-phosphoadenosine 5'-phosphosulfate synthase 2 [Source:HGNC Symbol;Acc:HGNC:8604]	no	no	no	no
chr10	ENSG00000237399				monoallelic			0	1	10	PITRM1-AS1	3141632	3167972	PITRM1 antisense RNA 1 [Source:HGNC Symbol;Acc:HGNC:44675]	no	no	no	no
chr11	ENSG00000166016				monoallelic			0	1	11	ABTB2	34150987	34358010	ankyrin repeat and BTB domain containing 2 [Source:HGNC Symbol;Acc:HGNC:23842]	no	no	no	no
chr11	ENSG00000173727				monoallelic			0	1	11	FAUP4	65455269	65455581	FAU pseudogene 4 [Source:HGNC Symbol;Acc:HGNC:56253]	no	no	no	no
chr11	ENSG00000175467				monoallelic			0	1	11	SART1	65961728	65980137	spliceosome associated factor 1, recruiter of U4/U6.U5 tri-snRNP [Source:HGNC Symbol;Acc:HGNC:10538]	no	no	no	no
chr11	ENSG00000184545				monoallelic		biallelic	1	1	11	DUSP8	1554051	1572271	dual specificity phosphatase 8 [Source:HGNC Symbol;Acc:HGNC:3074]	no	no	no	no
chr12	ENSG00000139718				monoallelic	biallelic	biallelic	2	1	12	SETD1B	121804009	121832656	SET domain containing 1B, histone lysine methyltransferase [Source:HGNC Symbol;Acc:HGNC:29187]	no	no	no	no
chr12	ENSG00000215021				monoallelic			0	1	12	PHB2	6965327	6970780	prohibitin 2 [Source:HGNC Symbol;Acc:HGNC:30306]	no	no	no	no
chr14	ENSG00000119686				monoallelic			0	1	14	FLVCR2	75578620	75663214	FLVCR heme transporter 2 [Source:HGNC Symbol;Acc:HGNC:20105]	no	no	no	no
chr14	ENSG00000239043				monoallelic			0	1	14	SNORD127	45110883	45110968	small nucleolar RNA, C/D box 127 [Source:HGNC Symbol;Acc:HGNC:33555]	no	no	no	no
chr15	ENSG00000104044				biallelic	monoallelic		1	1	15	OCA2	27754875	28099315	OCA2 melanosomal transmembrane protein [Source:HGNC Symbol;Acc:HGNC:8101]	no	no	no	no
chr15	ENSG00000128891				monoallelic	biallelic	biallelic	2	1	15	CCDC32	40528683	40565054	coiled-coil domain containing 32 [Source:HGNC Symbol;Acc:HGNC:28295]	no	no	no	no
chr15	ENSG00000215302				monoallelic			0	1	15	WHAMMP4	30470779	30484689	WHAMM pseudogene 4 [Source:HGNC Symbol;Acc:HGNC:55700]	no	no	no	no
chr15	ENSG00000258484				monoallelic			0	1	15	SPESP1	68818221	68946811	sperm equatorial segment protein 1 [Source:HGNC Symbol;Acc:HGNC:15570]	no	no	no	no
chr15	ENSG00000261143				monoallelic			0	1	15	ADAMTS7P3	77976042	77993057	ADAMTS7 pseudogene 3 [Source:HGNC Symbol;Acc:HGNC:49409]	no	no	no	no
chr16	ENSG00000103066				monoallelic	biallelic	biallelic	2	1	16	PLA2G15	68245304	68261058	phospholipase A2 group XV [Source:HGNC Symbol;Acc:HGNC:17163]	no	no	no	no
chr16	ENSG00000167981				monoallelic			0	1	16	ZNF597	3432414	3443504	zinc finger protein 597 [Source:HGNC Symbol;Acc:HGNC:26573]	no	no	no	no
chr16	ENSG00000196436				monoallelic			0	1	16	NPIPB15	74376306	74392115	nuclear pore complex interacting protein family member B15 [Source:HGNC Symbol;Acc:HGNC:34409]	no	no	no	no
chr16	ENSG00000261067				monoallelic			0	1	16		28974804	28990775	novel transcript	no	no	no	no
chr17	ENSG00000239672				monoallelic			0	1	17	NME1	51153559	51162428	NME/NM23 nucleoside diphosphate kinase 1 [Source:HGNC Symbol;Acc:HGNC:7849]	no	no	no	no
chr19	ENSG00000130529				monoallelic	biallelic	biallelic	2	1	19	TRPM4	49157741	49211836	transient receptor potential cation channel subfamily M member 4 [Source:HGNC Symbol;Acc:HGNC:17993]	no	no	no	no
chr20	ENSG00000101199				monoallelic			0	1	20	ARFGAP1	63272785	63289790	ADP ribosylation factor GTPase activating protein 1 [Source:HGNC Symbol;Acc:HGNC:15852]	no	no	no	no
chr22	ENSG00000205560				monoallelic	biallelic	biallelic	2	1	22	CPT1B	50568861	50578465	carnitine palmitoyltransferase 1B [Source:HGNC Symbol;Acc:HGNC:2329]	no	no	no	no
chr22	ENSG00000226450				monoallelic			0	1	22	CYP2D8P	42149886	42155001	ccytochrome P450 family 2 subfamily D member 8, pseudogene [Source:HGNC Symbol;Acc:HGNC:2628]	no	no	no	no
chr22	ENSG00000285531				monoallelic			0	1	22		41676745	41677125	LLP homolog, long-term synaptic facilitation ( LLPH) pseudogene	no	no	no	no
chrX	ENSG00000006757				monoallelic			0	1	X	PNPLA4	7898247	7927739	patatin like phospholipase domain containing 4 [Source:HGNC Symbol;Acc:HGNC:24887]	no	yes	no	no
chrX	ENSG00000063601				monoallelic			0	1	X	MTMR1	150692971	150765108	myotubularin related protein 1 [Source:HGNC Symbol;Acc:HGNC:7449]	no	no	no	yes
chrX	ENSG00000068308				monoallelic			0	1	X	OTUD5	48922024	48958386	OTU deubiquitinase 5 [Source:HGNC Symbol;Acc:HGNC:25402]	no	no	no	yes
chrX	ENSG00000130052				monoallelic			0	1	X	STARD8	68647666	68725842	StAR related lipid transfer domain containing 8 [Source:HGNC Symbol;Acc:HGNC:19161]	no	no	no	yes
chrX	ENSG00000184216				monoallelic			0	1	X	IRAK1	154010506	154019902	interleukin 1 receptor associated kinase 1 [Source:HGNC Symbol;Acc:HGNC:6112]	no	no	no	yes
chr1	ENSG00000116985					monoallelic		0	1	1	BMP8B	39757182	39788865	bone morphogenetic protein 8b [Source:HGNC Symbol;Acc:HGNC:1075]	no	no	no	no
chr1	ENSG00000142794					monoallelic		0	1	1	NBPF3	21440128	21485005	NBPF member 3 [Source:HGNC Symbol;Acc:HGNC:25076]	no	no	no	no
chr1	ENSG00000162607					monoallelic		0	1	1	USP1	62436297	62451804	ubiquitin specific peptidase 1 [Source:HGNC Symbol;Acc:HGNC:12607]	no	no	no	no
chr1	ENSG00000271425					monoallelic		0	1	1	NBPF10	146064711	146229000	NBPF member 10 [Source:HGNC Symbol;Acc:HGNC:31992]	no	no	no	no
chr2	ENSG00000176714					monoallelic	biallelic	1	1	2	CCDC121	27625638	27629012	coiled-coil domain containing 121 [Source:HGNC Symbol;Acc:HGNC:25833]	no	no	no	no
chr3	ENSG00000177383					monoallelic		0	1	3	MAGEF1	184710364	184712064	MAGE family member F1 [Source:HGNC Symbol;Acc:HGNC:29639]	no	no	no	no
chr3	ENSG00000180834					monoallelic		0	1	3	MAP6D1	183815922	183825594	MAP6 domain containing 1 [Source:HGNC Symbol;Acc:HGNC:25753]	no	no	no	no
chr3	ENSG00000254999					monoallelic	biallelic	1	1	3	BRK1	10115675	10127190	BRICK1 subunit of SCAR/WAVE actin nucleating complex [Source:HGNC Symbol;Acc:HGNC:23057]	no	no	no	no
chr5	ENSG00000155542					monoallelic	biallelic	1	1	5	SETD9	56909260	56925532	SET domain containing 9 [Source:HGNC Symbol;Acc:HGNC:28508]	no	no	no	no
chr5	ENSG00000164253					monoallelic		0	1	5	WDR41	77425970	77620611	WD repeat domain 41 [Source:HGNC Symbol;Acc:HGNC:25601]	no	no	no	no
chr6	ENSG00000111799					biallelic	monoallelic	1	1	6	COL12A1	75084326	75206267	collagen type XII alpha 1 chain [Source:HGNC Symbol;Acc:HGNC:2188]	no	no	no	no
chr6	ENSG00000124491					monoallelic		0	1	6	F13A1	6144084	6321013	coagulation factor XIII A chain [Source:HGNC Symbol;Acc:HGNC:3531]	no	no	no	no
chr6	ENSG00000135541					monoallelic	biallelic	1	1	6	AHI1	135283407	135498434	Abelson helper integration site 1 [Source:HGNC Symbol;Acc:HGNC:21575]	no	no	no	no
chr6	ENSG00000249141					monoallelic		0	1	6		166858094	166956124	novel protein	no	no	no	no
chr7	ENSG00000106603					monoallelic		0	1	7	COA1	43608456	43729717	cytochrome c oxidase assembly factor 1 [Source:HGNC Symbol;Acc:HGNC:21868]	no	no	no	no
chr7	ENSG00000204959					biallelic	monoallelic	1	1	7	ARHGEF34P	144272445	144286966	Rho guanine nucleotide exchange factor 34, pseudogene [Source:HGNC Symbol;Acc:HGNC:38086]	no	no	no	no
chr7	ENSG00000224940					monoallelic		0	1	7	PRRT4	128350325	128361690	proline rich transmembrane protein 4 [Source:HGNC Symbol;Acc:HGNC:37280]	no	no	no	no
chr7	ENSG00000283041					monoallelic		0	1	7		133034607	133035920	eukaryotic translation elongation factor 1 gamma (	no	no	no	no
chr10	ENSG00000095713					biallelic	monoallelic	1	1	10	CRTAC1	97865000	98030828	cartilage acidic protein 1 [Source:HGNC Symbol;Acc:HGNC:14882]	no	no	no	no
chr11	ENSG00000254986					monoallelic		0	1	11	DPP3	66480013	66509657	dipeptidyl peptidase 3 [Source:HGNC Symbol;Acc:HGNC:3008]	no	no	no	no
chr12	ENSG00000111664					monoallelic	biallelic	1	1	12	GNB3	6839954	6847393	G protein subunit beta 3 [Source:HGNC Symbol;Acc:HGNC:4400]	no	no	no	no
chr12	ENSG00000247498					monoallelic	biallelic	1	1	12	GPRC5D-AS1	12927712	12984645	GPRC5D and HEBP1 antisense RNA 1 [Source:HGNC Symbol;Acc:HGNC:53599]	no	no	no	no
chr14	ENSG00000100578					monoallelic	biallelic	1	1	14	KIAA0586	58427385	58551297	KIAA0586 [Source:HGNC Symbol;Acc:HGNC:19960]	no	no	no	no
chr14	ENSG00000100612					monoallelic		0	1	14	DHRS7	60144119	60169856	dehydrogenase/reductase 7 [Source:HGNC Symbol;Acc:HGNC:21524]	no	no	no	no
chr15	ENSG00000103978					monoallelic		0	1	15	TMEM87A	42210447	42273534	transmembrane protein 87A [Source:HGNC Symbol;Acc:HGNC:24522]	no	no	no	no
chr15	ENSG00000183476					monoallelic		0	1	15	SH2D7	78077808	78104370	SH2 domain containing 7 [Source:HGNC Symbol;Acc:HGNC:34549]	no	no	no	no
chr16	ENSG00000103342					monoallelic		0	1	16	GSPT1	11868128	11916082	G1 to S phase transition 1 [Source:HGNC Symbol;Acc:HGNC:4621]	no	no	no	no
chr16	ENSG00000238045					monoallelic		0	1	16	MVP-DT	29808636	29821252	MVP divergent transcript [Source:HGNC Symbol;Acc:HGNC:56029]	no	no	no	no
chr17	ENSG00000205544					monoallelic		0	1	17	TMEM256	7402975	7404097	transmembrane protein 256 [Source:HGNC Symbol;Acc:HGNC:28618]	no	no	no	no
chr17	ENSG00000264070					monoallelic		0	1	17	DND1P1	45585871	45586929	DND microRNA-mediated repression inhibitor 1 pseudogene 1 [Source:HGNC Symbol;Acc:HGNC:31444]	no	no	no	no
chr19	ENSG00000074855					monoallelic	biallelic	1	1	19	ANO8	17323223	17334855	anoctamin 8 [Source:HGNC Symbol;Acc:HGNC:29329]	no	no	no	no
chr19	ENSG00000080031					monoallelic		0	1	19	PTPRH	55181247	55209506	protein tyrosine phosphatase receptor type H [Source:HGNC Symbol;Acc:HGNC:9672]	no	no	no	no
chr19	ENSG00000170954					monoallelic		0	1	19	ZNF415	53107879	53133077	zinc finger protein 415 [Source:HGNC Symbol;Acc:HGNC:20636]	no	no	no	no
chr19	ENSG00000176761					monoallelic		0	1	19	ZNF285BP	44467641	44473227	zinc finger protein 285B, pseudogene [Source:HGNC Symbol;Acc:HGNC:33262]	no	no	no	no
chr19	ENSG00000214223					monoallelic	biallelic	1	1	19	HNRNPA1P10	11666069	11667030	heterogeneous nuclear ribonucleoprotein A1 pseudogene 10 [Source:HGNC Symbol;Acc:HGNC:39128]	no	no	no	no
chr19	ENSG00000267809					biallelic	monoallelic	1	1	19	NDUFV2P1	53223973	53224879	NADH:ubiquinone oxidoreductase core subunit V2 pseudogene 1 [Source:HGNC Symbol;Acc:HGNC:7718]	no	no	no	no
chr20	ENSG00000258366					monoallelic		0	1	20	RTEL1	63657810	63696253	regulator of telomere elongation helicase 1 [Source:HGNC Symbol;Acc:HGNC:15888]	no	no	no	no
chr21	ENSG00000275464					monoallelic		0	1	21		5130871	5154658	novel protein, similar to PWP2 periodic tryptophan protein homolog (yeast) PWP2	no	no	no	no
chrX	ENSG00000221867					monoallelic		0	1	X	MAGEA3	152698767	152702347	MAGE family member A3 [Source:HGNC Symbol;Acc:HGNC:6801]	no	no	no	no
chr1	ENSG00000184260						monoallelic	0	1	1	H2AC20	149886918	149887411	H2A clustered histone 20 [Source:HGNC Symbol;Acc:HGNC:4738]	no	no	no	no
chr2	ENSG00000233155						monoallelic	0	1	2	HMGA1P8	74418122	74418442	high mobility group AT-hook 1 pseudogene 8 [Source:HGNC Symbol;Acc:HGNC:39183]	no	no	no	no
chr3	ENSG00000177873						monoallelic	0	1	3	ZNF619	40477113	40491053	zinc finger protein 619 [Source:HGNC Symbol;Acc:HGNC:26910]	no	no	no	no
chr4	ENSG00000109475						monoallelic	0	1	4	RPL34	108620569	108630412	ribosomal protein L34 [Source:HGNC Symbol;Acc:HGNC:10340]	no	no	no	no
chr4	ENSG00000164037						monoallelic	0	1	4	SLC9B1	102885048	103019719	solute carrier family 9 member B1 [Source:HGNC Symbol;Acc:HGNC:24244]	no	no	no	no
chr5	ENSG00000120322						monoallelic	0	1	5	PCDHB8	141177790	141180539	protocadherin beta 8 [Source:HGNC Symbol;Acc:HGNC:8693]	no	no	no	no
chr6	ENSG00000156535						monoallelic	0	1	6	CD109	73695785	73828316	CD109 molecule [Source:HGNC Symbol;Acc:HGNC:21685]	no	no	no	no
chr6	ENSG00000231889						monoallelic	0	1	6	TRAF3IP2-AS1	111483459	111598783	TRAF3IP2 antisense RNA 1 [Source:HGNC Symbol;Acc:HGNC:40005]	no	no	no	no
chr10	ENSG00000264204						monoallelic	0	1	10	AGAP7P	46109621	46131358	ArfGAP with GTPase domain, ankyrin repeat and PH domain 7, pseudogene [Source:HGNC Symbol;Acc:HGNC:23465]	no	no	no	no
chr11	ENSG00000167325						monoallelic	0	1	11	RRM1	4094707	4138932	ribonucleotide reductase catalytic subunit M1 [Source:HGNC Symbol;Acc:HGNC:10451]	no	no	no	no
chr12	ENSG00000123329						monoallelic	0	1	12	ARHGAP9	57472264	57488814	Rho GTPase activating protein 9 [Source:HGNC Symbol;Acc:HGNC:14130]	no	no	no	no
chr12	ENSG00000185306						monoallelic	0	1	12	C12orf56	64264762	64390758	chromosome 12 open reading frame 56 [Source:HGNC Symbol;Acc:HGNC:26967]	no	no	no	no
chr13	ENSG00000102699						monoallelic	0	1	13	PARP4	24420931	24512778	poly(ADP-ribose) polymerase family member 4 [Source:HGNC Symbol;Acc:HGNC:271]	no	no	no	no
chr13	ENSG00000204442						monoallelic	0	1	13	NALF1	107163510	107867496	NALCN channel auxiliary factor 1 [Source:HGNC Symbol;Acc:HGNC:33877]	no	no	no	no
chr15	ENSG00000140398						monoallelic	0	1	15	NEIL1	75346955	75357115	nei like DNA glycosylase 1 [Source:HGNC Symbol;Acc:HGNC:18448]	no	no	no	no
chr16	ENSG00000188215						monoallelic	0	1	16	DCUN1D3	20854925	20900358	defective in cullin neddylation 1 domain containing 3 [Source:HGNC Symbol;Acc:HGNC:28734]	no	no	no	no
chr16	ENSG00000213937						monoallelic	0	1	16	CLDN9	3012923	3014505	claudin 9 [Source:HGNC Symbol;Acc:HGNC:2051]	no	no	no	no
chr17	ENSG00000171475						monoallelic	0	1	17	WIPF2	40219304	40284136	WAS/WASL interacting protein family member 2 [Source:HGNC Symbol;Acc:HGNC:30923]	no	no	no	no
chr18	ENSG00000287248						monoallelic	0	1	18		56026388	56029186	novel transcript	no	no	no	no
chr19	ENSG00000006659						monoallelic	0	1	19	LGALS14	39704481	39709444	galectin 14 [Source:HGNC Symbol;Acc:HGNC:30054]	no	no	no	no
chr19	ENSG00000105254						monoallelic	0	1	19	TBCB	36114289	36125947	tubulin folding cofactor B [Source:HGNC Symbol;Acc:HGNC:1989]	no	no	no	no
chr19	ENSG00000183760						monoallelic	0	1	19	ACP7	39083913	39111493	acid phosphatase 7, tartrate resistant (putative) [Source:HGNC Symbol;Acc:HGNC:33781]	no	no	no	no
chr19	ENSG00000219665						monoallelic	0	1	19	ZNF433-AS1	11987617	12046275	ZNF433 and ZNF878 antisense RNA 1 [Source:HGNC Symbol;Acc:HGNC:53776]	no	no	no	no
chr20	ENSG00000124209						monoallelic	0	1	20	RAB22A	58309715	58367507	RAB22A, member RAS oncogene family [Source:HGNC Symbol;Acc:HGNC:9764]	no	no	no	no
chr22	ENSG00000185386						monoallelic	0	1	22	MAPK11	50263713	50270767	mitogen-activated protein kinase 11 [Source:HGNC Symbol;Acc:HGNC:6873]	no	no	no	no
chrX	ENSG00000147144						monoallelic	0	1	X	CCDC120	49053572	49069857	coiled-coil domain containing 120 [Source:HGNC Symbol;Acc:HGNC:28910]	no	no	no	yes
chrX	ENSG00000196924						monoallelic	0	1	X	FLNA	154348524	154374634	filamin A [Source:HGNC Symbol;Acc:HGNC:3754]	no	no	no	yes
chr1	ENSG00000000457	biallelic	biallelic	biallelic	biallelic	biallelic	biallelic	6	0	1	SCYL3	169849631	169894267	SCY1 like pseudokinase 3 [Source:HGNC Symbol;Acc:HGNC:19285]	no	no	no	no
chr1	ENSG00000000460	biallelic	biallelic	biallelic	biallelic	biallelic	biallelic	6	0	1	C1orf112	169662007	169854080	chromosome 1 open reading frame 112 [Source:HGNC Symbol;Acc:HGNC:25565]	no	no	no	no
chr1	ENSG00000001460	biallelic	biallelic	biallelic	biallelic	biallelic	biallelic	6	0	1	STPG1	24356999	24416934	sperm tail PG-rich repeat containing 1 [Source:HGNC Symbol;Acc:HGNC:28070]	no	no	no	no
chr1	ENSG00000001461	biallelic	biallelic	biallelic	biallelic			4	0	1	NIPAL3	24415802	24472976	NIPA like domain containing 3 [Source:HGNC Symbol;Acc:HGNC:25233]	no	no	no	no
chr1	ENSG00000004487	biallelic	biallelic	biallelic	biallelic	biallelic	biallelic	6	0	1	KDM1A	23019443	23083689	lysine demethylase 1A [Source:HGNC Symbol;Acc:HGNC:29079]	no	no	no	no
chr1	ENSG00000007923	biallelic	biallelic	biallelic	biallelic	biallelic	biallelic	6	0	1	DNAJC11	6634168	6701924	DnaJ heat shock protein family (Hsp40) member C11 [Source:HGNC Symbol;Acc:HGNC:25570]	no	no	no	no
chr1	ENSG00000008118	biallelic						1	0	1	CAMK1G	209583714	209613939	calcium/calmodulin dependent protein kinase IG [Source:HGNC Symbol;Acc:HGNC:14585]	no	no	no	no
chr1	ENSG00000008128	biallelic	biallelic	biallelic	biallelic			4	0	1	CDK11A	1702379	1724357	cyclin dependent kinase 11A [Source:HGNC Symbol;Acc:HGNC:1730]	no	no	no	no
chr1	ENSG00000008130	biallelic	biallelic	biallelic	biallelic	biallelic	biallelic	6	0	1	NADK	1751232	1780457	NAD kinase [Source:HGNC Symbol;Acc:HGNC:29831]	no	no	no	no
chr1	ENSG00000009307	biallelic	biallelic					2	0	1	CSDE1	114716913	114758676	cold shock domain containing E1 [Source:HGNC Symbol;Acc:HGNC:29905]	no	no	no	no
chr1	ENSG00000009724	biallelic	biallelic			biallelic	biallelic	4	0	1	MASP2	11022009	11047239	MBL associated serine protease 2 [Source:HGNC Symbol;Acc:HGNC:6902]	no	no	no	no
chr1	ENSG00000009780	biallelic	biallelic					2	0	1	FAM76A	27725961	27763116	family with sequence similarity 76 member A [Source:HGNC Symbol;Acc:HGNC:28530]	no	no	no	no
chr1	ENSG00000010072	biallelic	biallelic					2	0	1	SPRTN	231337104	231355023	SprT-like N-terminal domain [Source:HGNC Symbol;Acc:HGNC:25356]	no	no	no	no
chr1	ENSG00000010165	biallelic	biallelic	biallelic	biallelic	biallelic	biallelic	6	0	1	METTL13	171781660	171814023	methyltransferase 13, eEF1A lysine and N-terminal methyltransferase [Source:HGNC Symbol;Acc:HGNC:24248]	no	no	no	no
chr1	ENSG00000011009	biallelic	biallelic					2	0	1	LYPLA2	23791145	23795539	lysophospholipase 2 [Source:HGNC Symbol;Acc:HGNC:6738]	no	no	no	no
chr1	ENSG00000014914	biallelic	biallelic			biallelic	biallelic	4	0	1	MTMR11	149928651	149936879	myotubularin related protein 11 [Source:HGNC Symbol;Acc:HGNC:24307]	no	no	no	no
chr1	ENSG00000020129	biallelic	biallelic					2	0	1	NCDN	35557473	35567274	neurochondrin [Source:HGNC Symbol;Acc:HGNC:17597]	no	no	no	no
chr1	ENSG00000023909	biallelic	biallelic					2	0	1	GCLM	93885199	93909456	glutamate-cysteine ligase modifier subunit [Source:HGNC Symbol;Acc:HGNC:4312]	no	no	no	no
chr1	ENSG00000037637	biallelic	biallelic	biallelic	biallelic	biallelic	biallelic	6	0	1	FBXO42	16246840	16352480	F-box protein 42 [Source:HGNC Symbol;Acc:HGNC:29249]	no	no	no	no
chr1	ENSG00000041988	biallelic	biallelic			biallelic	biallelic	4	0	1	THAP3	6624868	6635586	THAP domain containing 3 [Source:HGNC Symbol;Acc:HGNC:20855]	no	no	no	no
chr1	ENSG00000048707	biallelic	biallelic	biallelic	biallelic			4	0	1	VPS13D	12230030	12512047	vacuolar protein sorting 13 homolog D [Source:HGNC Symbol;Acc:HGNC:23595]	no	no	no	no
chr1	ENSG00000049239	biallelic	biallelic	biallelic	biallelic	biallelic	biallelic	6	0	1	H6PD	9234774	9271337	hexose-6-phosphate dehydrogenase/glucose 1-dehydrogenase [Source:HGNC Symbol;Acc:HGNC:4795]	no	no	no	no
chr1	ENSG00000049246	biallelic	biallelic	biallelic	biallelic	biallelic		5	0	1	PER3	7784291	7845177	period circadian regulator 3 [Source:HGNC Symbol;Acc:HGNC:8847]	no	no	no	no
chr1	ENSG00000052723	biallelic	biallelic					2	0	1	SIKE1	114769479	114780685	suppressor of IKBKE 1 [Source:HGNC Symbol;Acc:HGNC:26119]	no	no	no	no
chr1	ENSG00000053371	biallelic	biallelic	biallelic	biallelic	biallelic		5	0	1	AKR7A2	19303965	19312144	aldo-keto reductase family 7 member A2 [Source:HGNC Symbol;Acc:HGNC:389]	no	no	no	no
chr1	ENSG00000053372	biallelic	biallelic	biallelic	biallelic	biallelic	biallelic	6	0	1	MRTO4	19251805	19260128	MRT4 homolog, ribosome maturation factor [Source:HGNC Symbol;Acc:HGNC:18477]	no	no	no	no
chr1	ENSG00000054116	biallelic	biallelic					2	0	1	TRAPPC3	36136570	36156053	trafficking protein particle complex subunit 3 [Source:HGNC Symbol;Acc:HGNC:19942]	no	no	no	no
chr1	ENSG00000054282	biallelic	biallelic	biallelic	biallelic			4	0	1	SDCCAG8	243256034	243500091	SHH signaling and ciliogenesis regulator SDCCAG8 [Source:HGNC Symbol;Acc:HGNC:10671]	no	no	no	no
chr1	ENSG00000054523	biallelic	biallelic	biallelic	biallelic	biallelic	biallelic	6	0	1	KIF1B	10210570	10381603	kinesin family member 1B [Source:HGNC Symbol;Acc:HGNC:16636]	no	no	no	no
chr1	ENSG00000055732	biallelic	biallelic					2	0	1	MCOLN3	85018082	85048500	mucolipin TRP cation channel 3 [Source:HGNC Symbol;Acc:HGNC:13358]	no	no	no	no
chr1	ENSG00000057252	biallelic						1	0	1	SOAT1	179293714	179358680	sterol O-acyltransferase 1 [Source:HGNC Symbol;Acc:HGNC:11177]	no	no	no	no
chr1	ENSG00000058085	biallelic	biallelic	biallelic	biallelic	biallelic	biallelic	6	0	1	LAMC2	183186238	183245127	laminin subunit gamma 2 [Source:HGNC Symbol;Acc:HGNC:6493]	no	no	no	no
chr1	ENSG00000058453	biallelic	biallelic	biallelic	biallelic	biallelic	biallelic	6	0	1	CROCC	16740273	16972964	ciliary rootlet coiled-coil, rootletin [Source:HGNC Symbol;Acc:HGNC:21299]	no	no	no	no
chr1	ENSG00000058668	biallelic	biallelic					2	0	1	ATP2B4	203626832	203744081	ATPase plasma membrane Ca2+ transporting 4 [Source:HGNC Symbol;Acc:HGNC:817]	no	no	no	no
chr1	ENSG00000058799	biallelic	biallelic	biallelic	biallelic		biallelic	5	0	1	YIPF1	53851719	53889798	Yip1 domain family member 1 [Source:HGNC Symbol;Acc:HGNC:25231]	no	no	no	no
chr1	ENSG00000059588	biallelic	biallelic			biallelic	biallelic	4	0	1	TARBP1	234391313	234479179	TAR (HIV-1) RNA binding protein 1 [Source:HGNC Symbol;Acc:HGNC:11568]	no	no	no	no
chr1	ENSG00000060656	biallelic	biallelic	biallelic	biallelic	biallelic	biallelic	6	0	1	PTPRU	29236516	29326813	protein tyrosine phosphatase receptor type U [Source:HGNC Symbol;Acc:HGNC:9683]	no	no	no	no
chr1	ENSG00000060688	biallelic	biallelic			biallelic	biallelic	4	0	1	SNRNP40	31259568	31296788	small nuclear ribonucleoprotein U5 subunit 40 [Source:HGNC Symbol;Acc:HGNC:30857]	no	no	no	no
chr1	ENSG00000060718	biallelic	biallelic					2	0	1	COL11A1	102876467	103108872	collagen type XI alpha 1 chain [Source:HGNC Symbol;Acc:HGNC:2186]	no	no	no	no
chr1	ENSG00000065526	biallelic	biallelic			biallelic	biallelic	4	0	1	SPEN	15836095	15940456	spen family transcriptional repressor [Source:HGNC Symbol;Acc:HGNC:17575]	no	no	no	no
chr1	ENSG00000066279	biallelic	biallelic	biallelic	biallelic	biallelic	biallelic	6	0	1	ASPM	197084121	197146694	assembly factor for spindle microtubules [Source:HGNC Symbol;Acc:HGNC:19048]	no	no	no	no
chr1	ENSG00000067208	biallelic	biallelic			biallelic	biallelic	4	0	1	EVI5	92508696	92792404	ecotropic viral integration site 5 [Source:HGNC Symbol;Acc:HGNC:3501]	no	no	no	no
chr1	ENSG00000067334	biallelic	biallelic	biallelic	biallelic			4	0	1	DNTTIP2	93866284	93879918	deoxynucleotidyltransferase terminal interacting protein 2 [Source:HGNC Symbol;Acc:HGNC:24013]	no	no	no	no
chr1	ENSG00000067704	biallelic	biallelic			biallelic	biallelic	4	0	1	IARS2	220094132	220148041	isoleucyl-tRNA synthetase 2, mitochondrial [Source:HGNC Symbol;Acc:HGNC:29685]	no	no	no	no
chr1	ENSG00000069248	biallelic	biallelic			biallelic	biallelic	4	0	1	NUP133	229440259	229508341	nucleoporin 133 [Source:HGNC Symbol;Acc:HGNC:18016]	no	no	no	no
chr1	ENSG00000069424	biallelic	biallelic	biallelic	biallelic	biallelic	biallelic	6	0	1	KCNAB2	5990927	6101193	potassium voltage-gated channel subfamily A regulatory beta subunit 2 [Source:HGNC Symbol;Acc:HGNC:6229]	no	no	no	no
chr1	ENSG00000070886	biallelic	biallelic	biallelic	biallelic	biallelic	biallelic	6	0	1	EPHA8	22563489	22603595	EPH receptor A8 [Source:HGNC Symbol;Acc:HGNC:3391]	no	no	no	no
chr1	ENSG00000074800	biallelic	biallelic					2	0	1	ENO1	8861000	8879190	enolase 1 [Source:HGNC Symbol;Acc:HGNC:3350]	no	no	no	no
chr1	ENSG00000076864	biallelic	biallelic	biallelic	biallelic	biallelic	biallelic	6	0	1	RAP1GAP	21596221	21669357	RAP1 GTPase activating protein [Source:HGNC Symbol;Acc:HGNC:9858]	no	no	no	no
chr1	ENSG00000077152	biallelic	biallelic					2	0	1	UBE2T	202331544	202341984	ubiquitin conjugating enzyme E2 T [Source:HGNC Symbol;Acc:HGNC:25009]	no	no	no	no
chr1	ENSG00000077254	biallelic	biallelic					2	0	1	USP33	77695987	77759852	ubiquitin specific peptidase 33 [Source:HGNC Symbol;Acc:HGNC:20059]	no	no	no	no
chr1	ENSG00000077522	biallelic	biallelic					2	0	1	ACTN2	236664141	236764631	actinin alpha 2 [Source:HGNC Symbol;Acc:HGNC:164]	no	no	no	no
chr1	ENSG00000077549	biallelic	biallelic				biallelic	3	0	1	CAPZB	19338775	19485539	capping actin protein of muscle Z-line subunit beta [Source:HGNC Symbol;Acc:HGNC:1491]	no	no	no	no
chr1	ENSG00000078369	biallelic	biallelic					2	0	1	GNB1	1785285	1892292	G protein subunit beta 1 [Source:HGNC Symbol;Acc:HGNC:4396]	no	no	no	no
chr1	ENSG00000078618	biallelic	biallelic	biallelic	biallelic	biallelic	biallelic	6	0	1	NRDC	51789191	51878805	nardilysin convertase [Source:HGNC Symbol;Acc:HGNC:7995]	no	no	no	no
chr1	ENSG00000078808	biallelic	biallelic					2	0	1	SDF4	1216931	1232031	stromal cell derived factor 4 [Source:HGNC Symbol;Acc:HGNC:24188]	no	no	no	no
chr1	ENSG00000078900	biallelic	biallelic	biallelic	biallelic			4	0	1	TP73	3652516	3736201	tumor protein p73 [Source:HGNC Symbol;Acc:HGNC:12003]	no	no	no	no
chr1	ENSG00000079335	biallelic	biallelic	biallelic	biallelic			4	0	1	CDC14A	100345001	100520277	cell division cycle 14A [Source:HGNC Symbol;Acc:HGNC:1718]	no	no	no	no
chr1	ENSG00000079739	biallelic	biallelic	biallelic	biallelic	biallelic	biallelic	6	0	1	PGM1	63593411	63660245	phosphoglucomutase 1 [Source:HGNC Symbol;Acc:HGNC:8905]	no	no	no	no
chr1	ENSG00000080947	biallelic	biallelic	biallelic	biallelic			4	0	1	CROCCP3	16474396	16491307	CROCC pseudogene 3 [Source:HGNC Symbol;Acc:HGNC:29405]	no	no	no	no
chr1	ENSG00000081870	biallelic	biallelic					2	0	1	HSPB11	53916574	53945699	heat shock protein family B (small) member 11 [Source:HGNC Symbol;Acc:HGNC:25019]	no	no	no	no
chr1	ENSG00000083444	biallelic	biallelic	biallelic	biallelic			4	0	1	PLOD1	11934205	11975538	procollagen-lysine,2-oxoglutarate 5-dioxygenase 1 [Source:HGNC Symbol;Acc:HGNC:9081]	no	no	no	no
chr1	ENSG00000085465	biallelic	biallelic	biallelic	biallelic	biallelic	biallelic	6	0	1	OVGP1	111414319	111427735	oviductal glycoprotein 1 [Source:HGNC Symbol;Acc:HGNC:8524]	no	no	no	no
chr1	ENSG00000085491	biallelic	biallelic	biallelic	biallelic			4	0	1	SLC25A24	108134043	108200849	solute carrier family 25 member 24 [Source:HGNC Symbol;Acc:HGNC:20662]	no	no	no	no
chr1	ENSG00000085552	biallelic	biallelic			biallelic	biallelic	4	0	1	IGSF9	159927039	159945613	immunoglobulin superfamily member 9 [Source:HGNC Symbol;Acc:HGNC:18132]	no	no	no	no
chr1	ENSG00000085832	biallelic	biallelic	biallelic	biallelic			4	0	1	EPS15	51354263	51519328	epidermal growth factor receptor pathway substrate 15 [Source:HGNC Symbol;Acc:HGNC:3419]	no	no	no	no
chr1	ENSG00000085998	biallelic	biallelic	biallelic	biallelic	biallelic	biallelic	6	0	1	POMGNT1	46188683	46220305	protein O-linked mannose N-acetylglucosaminyltransferase 1 (beta 1,2-) [Source:HGNC Symbol;Acc:HGNC:19139]	no	no	no	no
chr1	ENSG00000085999	biallelic	biallelic					2	0	1	RAD54L	46246461	46278480	RAD54 like [Source:HGNC Symbol;Acc:HGNC:9826]	no	no	no	no
chr1	ENSG00000086015	biallelic	biallelic	biallelic	biallelic	biallelic	biallelic	6	0	1	MAST2	45786987	46036122	microtubule associated serine/threonine kinase 2 [Source:HGNC Symbol;Acc:HGNC:19035]	no	no	no	no
chr1	ENSG00000088035	biallelic	biallelic			biallelic	biallelic	4	0	1	ALG6	63367575	63438553	ALG6 alpha-1,3-glucosyltransferase [Source:HGNC Symbol;Acc:HGNC:23157]	no	no	no	no
chr1	ENSG00000088280	biallelic	biallelic			biallelic	biallelic	4	0	1	ASAP3	23428563	23484568	ArfGAP with SH3 domain, ankyrin repeat and PH domain 3 [Source:HGNC Symbol;Acc:HGNC:14987]	no	no	no	no
chr1	ENSG00000090432	biallelic	biallelic		biallelic			3	0	1	MUL1	20499448	20508151	mitochondrial E3 ubiquitin protein ligase 1 [Source:HGNC Symbol;Acc:HGNC:25762]	no	no	no	no
chr1	ENSG00000090621	biallelic	biallelic					2	0	1	PABPC4	39560709	39576790	poly(A) binding protein cytoplasmic 4 [Source:HGNC Symbol;Acc:HGNC:8557]	no	no	no	no
chr1	ENSG00000092621	biallelic	biallelic	biallelic	biallelic	biallelic	biallelic	6	0	1	PHGDH	119648411	119744218	phosphoglycerate dehydrogenase [Source:HGNC Symbol;Acc:HGNC:8923]	no	no	no	no
chr1	ENSG00000092847	biallelic	biallelic					2	0	1	AGO1	35869808	35930532	argonaute RISC component 1 [Source:HGNC Symbol;Acc:HGNC:3262]	no	no	no	no
chr1	ENSG00000092853	biallelic	biallelic					2	0	1	CLSPN	35720218	35769978	claspin [Source:HGNC Symbol;Acc:HGNC:19715]	no	no	no	no
chr1	ENSG00000097046	biallelic	biallelic			biallelic	biallelic	4	0	1	CDC7	91500851	91525764	cell division cycle 7 [Source:HGNC Symbol;Acc:HGNC:1745]	no	no	no	no
chr1	ENSG00000097096	biallelic	biallelic	biallelic	biallelic			4	0	1	SYDE2	85156889	85201724	synapse defective Rho GTPase homolog 2 [Source:HGNC Symbol;Acc:HGNC:25841]	no	no	no	no
chr1	ENSG00000107404	biallelic	biallelic	biallelic	biallelic			4	0	1	DVL1	1335276	1349418	dishevelled segment polarity protein 1 [Source:HGNC Symbol;Acc:HGNC:3084]	no	no	no	no
chr1	ENSG00000116128	biallelic	biallelic			biallelic	biallelic	4	0	1	BCL9	147541501	147626216	BCL9 transcription coactivator [Source:HGNC Symbol;Acc:HGNC:1008]	no	no	no	no
chr1	ENSG00000116133	biallelic	biallelic			biallelic	biallelic	4	0	1	DHCR24	54849627	54887195	24-dehydrocholesterol reductase [Source:HGNC Symbol;Acc:HGNC:2859]	no	no	no	no
chr1	ENSG00000116157	biallelic	biallelic					2	0	1	GPX7	52602371	52609051	glutathione peroxidase 7 [Source:HGNC Symbol;Acc:HGNC:4559]	no	no	no	no
chr1	ENSG00000116161	biallelic	biallelic	biallelic	biallelic	biallelic	biallelic	6	0	1	CACYBP	174999163	175012027	calcyclin binding protein [Source:HGNC Symbol;Acc:HGNC:30423]	no	no	no	no
chr1	ENSG00000116171	biallelic	biallelic					2	0	1	SCP2	52927276	53051698	sterol carrier protein 2 [Source:HGNC Symbol;Acc:HGNC:10606]	no	no	no	no
chr1	ENSG00000116191	biallelic	biallelic	biallelic	biallelic	biallelic	biallelic	6	0	1	RALGPS2	178725165	178921842	Ral GEF with PH domain and SH3 binding motif 2 [Source:HGNC Symbol;Acc:HGNC:30279]	no	no	no	no
chr1	ENSG00000116198	biallelic	biallelic			biallelic	biallelic	4	0	1	CEP104	3812086	3857396	centrosomal protein 104 [Source:HGNC Symbol;Acc:HGNC:24866]	no	no	no	no
chr1	ENSG00000116212	biallelic	biallelic					2	0	1	LRRC42	53946085	53968168	leucine rich repeat containing 42 [Source:HGNC Symbol;Acc:HGNC:28792]	no	no	no	no
chr1	ENSG00000116213	biallelic	biallelic			biallelic	biallelic	4	0	1	WRAP73	3630767	3652761	WD repeat containing, antisense to TP73 [Source:HGNC Symbol;Acc:HGNC:12759]	no	no	no	no
chr1	ENSG00000116221	biallelic	biallelic			biallelic	biallelic	4	0	1	MRPL37	54184041	54225464	mitochondrial ribosomal protein L37 [Source:HGNC Symbol;Acc:HGNC:14034]	no	no	no	no
chr1	ENSG00000116237	biallelic	biallelic					2	0	1	ICMT	6221193	6235972	isoprenylcysteine carboxyl methyltransferase [Source:HGNC Symbol;Acc:HGNC:5350]	no	no	no	no
chr1	ENSG00000116251	biallelic	biallelic			biallelic	biallelic	4	0	1	RPL22	6185020	6209389	ribosomal protein L22 [Source:HGNC Symbol;Acc:HGNC:10315]	no	no	no	no
chr1	ENSG00000116260	biallelic	biallelic			biallelic	biallelic	4	0	1	QSOX1	180154869	180204030	quiescin sulfhydryl oxidase 1 [Source:HGNC Symbol;Acc:HGNC:9756]	no	no	no	no
chr1	ENSG00000116266	biallelic	biallelic	biallelic	biallelic	biallelic	biallelic	6	0	1	STXBP3	108746674	108809523	syntaxin binding protein 3 [Source:HGNC Symbol;Acc:HGNC:11446]	no	no	no	no
chr1	ENSG00000116329	biallelic	biallelic				biallelic	3	0	1	OPRD1	28812170	28871267	opioid receptor delta 1 [Source:HGNC Symbol;Acc:HGNC:8153]	no	no	no	no
chr1	ENSG00000116337	biallelic	biallelic	biallelic	biallelic			4	0	1	AMPD2	109616104	109632051	adenosine monophosphate deaminase 2 [Source:HGNC Symbol;Acc:HGNC:469]	no	no	no	no
chr1	ENSG00000116350	biallelic	biallelic	biallelic	biallelic	biallelic	biallelic	6	0	1	SRSF4	29147743	29181900	serine and arginine rich splicing factor 4 [Source:HGNC Symbol;Acc:HGNC:10786]	no	no	no	no
chr1	ENSG00000116353	biallelic	biallelic					2	0	1	MECR	29192657	29230942	mitochondrial trans-2-enoyl-CoA reductase [Source:HGNC Symbol;Acc:HGNC:19691]	no	no	no	no
chr1	ENSG00000116396	biallelic	biallelic					2	0	1	KCNC4	110210314	110283100	potassium voltage-gated channel subfamily C member 4 [Source:HGNC Symbol;Acc:HGNC:6236]	no	no	no	no
chr1	ENSG00000116406	biallelic	biallelic			biallelic	biallelic	4	0	1	EDEM3	184690237	184754907	ER degradation enhancing alpha-mannosidase like protein 3 [Source:HGNC Symbol;Acc:HGNC:16787]	no	no	no	no
chr1	ENSG00000116497	biallelic	biallelic					2	0	1	S100PBP	32816767	32858875	S100P binding protein [Source:HGNC Symbol;Acc:HGNC:25768]	no	no	no	no
chr1	ENSG00000116514	biallelic	biallelic	biallelic	biallelic			4	0	1	RNF19B	32936445	32964809	ring finger protein 19B [Source:HGNC Symbol;Acc:HGNC:26886]	no	no	no	no
chr1	ENSG00000116521	biallelic	biallelic					2	0	1	SCAMP3	155255979	155262430	secretory carrier membrane protein 3 [Source:HGNC Symbol;Acc:HGNC:10565]	no	no	no	no
chr1	ENSG00000116539	biallelic	biallelic	biallelic	biallelic			4	0	1	ASH1L	155335268	155563162	ASH1 like histone lysine methyltransferase [Source:HGNC Symbol;Acc:HGNC:19088]	no	no	no	no
chr1	ENSG00000116580	biallelic	biallelic					2	0	1	GON4L	155749659	155859400	gon-4 like [Source:HGNC Symbol;Acc:HGNC:25973]	no	no	no	no
chr1	ENSG00000116649	biallelic	biallelic					2	0	1	SRM	11054584	11060020	spermidine synthase [Source:HGNC Symbol;Acc:HGNC:11296]	no	no	no	no
chr1	ENSG00000116668	biallelic	biallelic	biallelic	biallelic	biallelic	biallelic	6	0	1	SWT1	185157080	185291781	SWT1 RNA endoribonuclease homolog [Source:HGNC Symbol;Acc:HGNC:16785]	no	no	no	no
chr1	ENSG00000116678	biallelic	biallelic	biallelic	biallelic	biallelic	biallelic	6	0	1	LEPR	65420652	65641559	leptin receptor [Source:HGNC Symbol;Acc:HGNC:6554]	no	no	no	no
chr1	ENSG00000116688	biallelic						1	0	1	MFN2	11980181	12015211	mitofusin 2 [Source:HGNC Symbol;Acc:HGNC:16877]	no	no	no	no
chr1	ENSG00000116691	biallelic	biallelic			biallelic	biallelic	4	0	1	MIIP	12019466	12032045	migration and invasion inhibitory protein [Source:HGNC Symbol;Acc:HGNC:25715]	no	no	no	no
chr1	ENSG00000116704	biallelic	biallelic					2	0	1	SLC35D1	66999350	67054148	solute carrier family 35 member D1 [Source:HGNC Symbol;Acc:HGNC:20800]	no	no	no	no
chr1	ENSG00000116729	biallelic	biallelic	biallelic	biallelic	biallelic		5	0	1	WLS	68098473	68233120	Wnt ligand secretion mediator [Source:HGNC Symbol;Acc:HGNC:30238]	no	no	no	no
chr1	ENSG00000116771	biallelic	biallelic	biallelic	biallelic	biallelic	biallelic	6	0	1	AGMAT	15571699	15585051	agmatinase [Source:HGNC Symbol;Acc:HGNC:18407]	no	no	no	no
chr1	ENSG00000116774	biallelic						1	0	1	OLFML3	113979391	114035572	olfactomedin like 3 [Source:HGNC Symbol;Acc:HGNC:24956]	no	no	no	no
chr1	ENSG00000116786	biallelic	biallelic	biallelic	biallelic	biallelic	biallelic	6	0	1	PLEKHM2	15684320	15734769	pleckstrin homology and RUN domain containing M2 [Source:HGNC Symbol;Acc:HGNC:29131]	no	no	no	no
chr1	ENSG00000116791	biallelic	biallelic	biallelic	biallelic	biallelic	biallelic	6	0	1	CRYZ	74705482	74733408	crystallin zeta [Source:HGNC Symbol;Acc:HGNC:2419]	no	no	no	no
chr1	ENSG00000116809	biallelic	biallelic			biallelic	biallelic	4	0	1	ZBTB17	15941869	15976132	zinc finger and BTB domain containing 17 [Source:HGNC Symbol;Acc:HGNC:12936]	no	no	no	no
chr1	ENSG00000116815	biallelic	biallelic					2	0	1	CD58	116514534	116571039	CD58 molecule [Source:HGNC Symbol;Acc:HGNC:1688]	no	no	no	no
chr1	ENSG00000116833	biallelic	biallelic	biallelic	biallelic	biallelic	biallelic	6	0	1	NR5A2	200027614	200177420	nuclear receptor subfamily 5 group A member 2 [Source:HGNC Symbol;Acc:HGNC:7984]	no	no	no	no
chr1	ENSG00000116852	biallelic	biallelic	biallelic	biallelic			4	0	1	KIF21B	200969390	201023714	kinesin family member 21B [Source:HGNC Symbol;Acc:HGNC:29442]	no	no	no	no
chr1	ENSG00000116871	biallelic	biallelic					2	0	1	MAP7D1	36155579	36180849	MAP7 domain containing 1 [Source:HGNC Symbol;Acc:HGNC:25514]	no	no	no	no
chr1	ENSG00000116906	biallelic	biallelic			biallelic	biallelic	4	0	1	GNPAT	231241207	231277973	glyceronephosphate O-acyltransferase [Source:HGNC Symbol;Acc:HGNC:4416]	no	no	no	no
chr1	ENSG00000116922	biallelic	biallelic	biallelic	biallelic	biallelic	biallelic	6	0	1	C1orf109	37681570	37692249	chromosome 1 open reading frame 109 [Source:HGNC Symbol;Acc:HGNC:26039]	no	no	no	no
chr1	ENSG00000116962	biallelic	biallelic	biallelic	biallelic	biallelic	biallelic	6	0	1	NID1	235975830	236065109	nidogen 1 [Source:HGNC Symbol;Acc:HGNC:7821]	no	no	no	no
chr1	ENSG00000116977	biallelic	biallelic			biallelic	biallelic	4	0	1	LGALS8	236518000	236552981	galectin 8 [Source:HGNC Symbol;Acc:HGNC:6569]	no	no	no	no
chr1	ENSG00000116984	biallelic	biallelic	biallelic	biallelic			4	0	1	MTR	236795260	236921278	5-methyltetrahydrofolate-homocysteine methyltransferase [Source:HGNC Symbol;Acc:HGNC:7468]	no	no	no	no
chr1	ENSG00000116990	biallelic	biallelic					2	0	1	MYCL	39895426	39902256	MYCL proto-oncogene, bHLH transcription factor [Source:HGNC Symbol;Acc:HGNC:7555]	no	no	no	no
chr1	ENSG00000116991	biallelic	biallelic	biallelic	biallelic	biallelic	biallelic	6	0	1	SIPA1L2	232397965	232630571	signal induced proliferation associated 1 like 2 [Source:HGNC Symbol;Acc:HGNC:23800]	no	no	no	no
chr1	ENSG00000117000	biallelic	biallelic	biallelic	biallelic	biallelic	biallelic	6	0	1	RLF	40161387	40240921	RLF zinc finger [Source:HGNC Symbol;Acc:HGNC:10025]	no	no	no	no
chr1	ENSG00000117010	biallelic	biallelic					2	0	1	ZNF684	40531573	40548167	zinc finger protein 684 [Source:HGNC Symbol;Acc:HGNC:28418]	no	no	no	no
chr1	ENSG00000117054	biallelic	biallelic	biallelic	biallelic			4	0	1	ACADM	75724431	75787575	acyl-CoA dehydrogenase medium chain [Source:HGNC Symbol;Acc:HGNC:89]	no	no	no	no
chr1	ENSG00000117069	biallelic	biallelic					2	0	1	ST6GALNAC5	76867480	77067546	ST6 N-acetylgalactosaminide alpha-2,6-sialyltransferase 5 [Source:HGNC Symbol;Acc:HGNC:19342]	no	no	no	no
chr1	ENSG00000117114	biallelic	biallelic	biallelic	biallelic			4	0	1	ADGRL2	81306147	81993932	adhesion G protein-coupled receptor L2 [Source:HGNC Symbol;Acc:HGNC:18582]	no	no	no	no
chr1	ENSG00000117115	biallelic	biallelic	biallelic	biallelic			4	0	1	PADI2	17066761	17119451	peptidyl arginine deiminase 2 [Source:HGNC Symbol;Acc:HGNC:18341]	no	no	no	no
chr1	ENSG00000117133	biallelic	biallelic	biallelic	biallelic	biallelic	biallelic	6	0	1	RPF1	84479259	84498352	ribosome production factor 1 homolog [Source:HGNC Symbol;Acc:HGNC:30350]	no	no	no	no
chr1	ENSG00000117154	biallelic	biallelic					2	0	1	IGSF21	18107798	18378483	immunoglobin superfamily member 21 [Source:HGNC Symbol;Acc:HGNC:28246]	no	no	no	no
chr1	ENSG00000117155	biallelic	biallelic	biallelic	biallelic			4	0	1	SSX2IP	84643706	84690803	SSX family member 2 interacting protein [Source:HGNC Symbol;Acc:HGNC:16509]	no	no	no	no
chr1	ENSG00000117222	biallelic	biallelic			biallelic	biallelic	4	0	1	RBBP5	205086142	205122015	RB binding protein 5, histone lysine methyltransferase complex subunit [Source:HGNC Symbol;Acc:HGNC:9888]	no	no	no	no
chr1	ENSG00000117245	biallelic	biallelic			biallelic	biallelic	4	0	1	KIF17	20664014	20718017	kinesin family member 17 [Source:HGNC Symbol;Acc:HGNC:19167]	no	no	no	no
chr1	ENSG00000117266	biallelic	biallelic	biallelic	biallelic	biallelic	biallelic	6	0	1	CDK18	205504596	205532793	cyclin dependent kinase 18 [Source:HGNC Symbol;Acc:HGNC:8751]	no	no	no	no
chr1	ENSG00000117280	biallelic	biallelic	biallelic	biallelic	biallelic	biallelic	6	0	1	RAB29	205767986	205775482	RAB29, member RAS oncogene family [Source:HGNC Symbol;Acc:HGNC:9789]	no	no	no	no
chr1	ENSG00000117298	biallelic	biallelic		biallelic	biallelic		4	0	1	ECE1	21217247	21345572	endothelin converting enzyme 1 [Source:HGNC Symbol;Acc:HGNC:3146]	no	no	no	no
chr1	ENSG00000117305	biallelic	biallelic	biallelic	biallelic			4	0	1	HMGCL	23801885	23838620	3-hydroxy-3-methylglutaryl-CoA lyase [Source:HGNC Symbol;Acc:HGNC:5005]	no	no	no	no
chr1	ENSG00000117318	biallelic	biallelic	biallelic	biallelic			4	0	1	ID3	23557926	23559501	inhibitor of DNA binding 3 [Source:HGNC Symbol;Acc:HGNC:5362]	no	no	no	no
chr1	ENSG00000117322	biallelic		biallelic	biallelic	biallelic	biallelic	5	0	1	CR2	207453024	207489895	complement C3d receptor 2 [Source:HGNC Symbol;Acc:HGNC:2336]	no	no	no	no
chr1	ENSG00000117360	biallelic	biallelic					2	0	1	PRPF3	150321479	150353233	pre-mRNA processing factor 3 [Source:HGNC Symbol;Acc:HGNC:17348]	no	no	no	no
chr1	ENSG00000117362	biallelic	biallelic					2	0	1	APH1A	150265399	150269580	aph-1 homolog A, gamma-secretase subunit [Source:HGNC Symbol;Acc:HGNC:29509]	no	no	no	no
chr1	ENSG00000117394	biallelic	biallelic					2	0	1	SLC2A1	42925353	42958893	solute carrier family 2 member 1 [Source:HGNC Symbol;Acc:HGNC:11005]	no	no	no	no
chr1	ENSG00000117395	biallelic	biallelic					2	0	1	EBNA1BP2	43164175	43270936	EBNA1 binding protein 2 [Source:HGNC Symbol;Acc:HGNC:15531]	no	no	no	no
chr1	ENSG00000117407	biallelic	biallelic	biallelic	biallelic			4	0	1	ARTN	43933320	43937240	artemin [Source:HGNC Symbol;Acc:HGNC:727]	no	no	no	no
chr1	ENSG00000117408	biallelic	biallelic					2	0	1	IPO13	43946950	43968022	importin 13 [Source:HGNC Symbol;Acc:HGNC:16853]	no	no	no	no
chr1	ENSG00000117411	biallelic	biallelic	biallelic	biallelic			4	0	1	B4GALT2	43978943	43991170	beta-1,4-galactosyltransferase 2 [Source:HGNC Symbol;Acc:HGNC:925]	no	no	no	no
chr1	ENSG00000117461	biallelic						1	0	1	PIK3R3	46040140	46133036	phosphoinositide-3-kinase regulatory subunit 3 [Source:HGNC Symbol;Acc:HGNC:8981]	no	no	no	no
chr1	ENSG00000117477	biallelic	biallelic	biallelic	biallelic			4	0	1	CCDC181	169394870	169460669	coiled-coil domain containing 181 [Source:HGNC Symbol;Acc:HGNC:28051]	no	no	no	no
chr1	ENSG00000117480	biallelic	biallelic	biallelic	biallelic	biallelic	biallelic	6	0	1	FAAH	46394317	46413848	fatty acid amide hydrolase [Source:HGNC Symbol;Acc:HGNC:3553]	no	no	no	no
chr1	ENSG00000117481	biallelic	biallelic	biallelic	biallelic	biallelic	biallelic	6	0	1	NSUN4	46340789	46365152	NOP2/Sun RNA methyltransferase 4 [Source:HGNC Symbol;Acc:HGNC:31802]	no	no	no	no
chr1	ENSG00000117500	biallelic	biallelic	biallelic	biallelic			4	0	1	TMED5	93149742	93180516	transmembrane p24 trafficking protein 5 [Source:HGNC Symbol;Acc:HGNC:24251]	no	no	no	no
chr1	ENSG00000117505	biallelic	biallelic					2	0	1	DR1	93345907	93369493	down-regulator of transcription 1 [Source:HGNC Symbol;Acc:HGNC:3017]	no	no	no	no
chr1	ENSG00000117519	biallelic	biallelic			biallelic	biallelic	4	0	1	CNN3	94896949	94927223	calponin 3 [Source:HGNC Symbol;Acc:HGNC:2157]	no	no	no	no
chr1	ENSG00000117523	biallelic	biallelic	biallelic	biallelic	biallelic	biallelic	6	0	1	PRRC2C	171485530	171593511	proline rich coiled-coil 2C [Source:HGNC Symbol;Acc:HGNC:24903]	no	no	no	no
chr1	ENSG00000117525	biallelic	biallelic					2	0	1	F3	94529173	94541759	coagulation factor III, tissue factor [Source:HGNC Symbol;Acc:HGNC:3541]	no	no	no	no
chr1	ENSG00000117528	biallelic	biallelic			biallelic	biallelic	4	0	1	ABCD3	94418389	94518666	ATP binding cassette subfamily D member 3 [Source:HGNC Symbol;Acc:HGNC:67]	no	no	no	no
chr1	ENSG00000117614	biallelic	biallelic					2	0	1	SYF2	25222276	25232502	SYF2 pre-mRNA splicing factor [Source:HGNC Symbol;Acc:HGNC:19824]	no	no	no	no
chr1	ENSG00000117616	biallelic	biallelic	biallelic	biallelic	biallelic	biallelic	6	0	1	RSRP1	25242249	25338213	arginine and serine rich protein 1 [Source:HGNC Symbol;Acc:HGNC:25234]	no	no	no	no
chr1	ENSG00000117620	biallelic						1	0	1	SLC35A3	99969351	100035634	solute carrier family 35 member A3 [Source:HGNC Symbol;Acc:HGNC:11023]	no	no	no	no
chr1	ENSG00000117625	biallelic	biallelic					2	0	1	RCOR3	211258377	211316385	REST corepressor 3 [Source:HGNC Symbol;Acc:HGNC:25594]	no	no	no	no
chr1	ENSG00000117640	biallelic	biallelic			biallelic	biallelic	4	0	1	MTFR1L	25818640	25832942	mitochondrial fission regulator 1 like [Source:HGNC Symbol;Acc:HGNC:28836]	no	no	no	no
chr1	ENSG00000117643	biallelic	biallelic	biallelic	biallelic			4	0	1	MAN1C1	25616791	25786206	mannosidase alpha class 1C member 1 [Source:HGNC Symbol;Acc:HGNC:19080]	no	no	no	no
chr1	ENSG00000117650	biallelic	biallelic					2	0	1	NEK2	211658657	211675630	NIMA related kinase 2 [Source:HGNC Symbol;Acc:HGNC:7745]	no	no	no	no
chr1	ENSG00000117676	biallelic	biallelic	biallelic	biallelic	biallelic	biallelic	6	0	1	RPS6KA1	26529761	26575030	ribosomal protein S6 kinase A1 [Source:HGNC Symbol;Acc:HGNC:10430]	no	no	no	no
chr1	ENSG00000117682	biallelic	biallelic					2	0	1	DHDDS	26432282	26471306	dehydrodolichyl diphosphate synthase subunit [Source:HGNC Symbol;Acc:HGNC:20603]	no	no	no	no
chr1	ENSG00000117691	biallelic	biallelic			biallelic	biallelic	4	0	1	NENF	212432920	212446379	neudesin neurotrophic factor [Source:HGNC Symbol;Acc:HGNC:30384]	no	no	no	no
chr1	ENSG00000117697	biallelic	biallelic	biallelic	biallelic	biallelic	biallelic	6	0	1	NSL1	212726153	212791782	NSL1 component of MIS12 kinetochore complex [Source:HGNC Symbol;Acc:HGNC:24548]	no	no	no	no
chr1	ENSG00000117713	biallelic	biallelic					2	0	1	ARID1A	26693236	26782104	AT-rich interaction domain 1A [Source:HGNC Symbol;Acc:HGNC:11110]	no	no	no	no
chr1	ENSG00000117724	biallelic	biallelic	biallelic	biallelic	biallelic	biallelic	6	0	1	CENPF	214603185	214664574	centromere protein F [Source:HGNC Symbol;Acc:HGNC:1857]	no	no	no	no
chr1	ENSG00000117791	biallelic	biallelic					2	0	1	MTARC2	220748225	220784815	mitochondrial amidoxime reducing component 2 [Source:HGNC Symbol;Acc:HGNC:26064]	no	no	no	no
chr1	ENSG00000118193	biallelic	biallelic	biallelic	biallelic	biallelic	biallelic	6	0	1	KIF14	200551497	200620751	kinesin family member 14 [Source:HGNC Symbol;Acc:HGNC:19181]	no	no	no	no
chr1	ENSG00000118292	biallelic	biallelic					2	0	1	C1orf54	150268200	150280916	chromosome 1 open reading frame 54 [Source:HGNC Symbol;Acc:HGNC:26258]	no	no	no	no
chr1	ENSG00000118655	biallelic	biallelic					2	0	1	DCLRE1B	113904619	113914086	DNA cross-link repair 1B [Source:HGNC Symbol;Acc:HGNC:17641]	no	no	no	no
chr1	ENSG00000118873	biallelic	biallelic					2	0	1	RAB3GAP2	220148293	220272529	RAB3 GTPase activating non-catalytic protein subunit 2 [Source:HGNC Symbol;Acc:HGNC:17168]	no	no	no	no
chr1	ENSG00000120949	biallelic	biallelic	biallelic	biallelic	biallelic	biallelic	6	0	1	TNFRSF8	12063303	12144207	TNF receptor superfamily member 8 [Source:HGNC Symbol;Acc:HGNC:11923]	no	no	no	no
chr1	ENSG00000121310	biallelic	biallelic	biallelic	biallelic			4	0	1	ECHDC2	52895910	52927212	enoyl-CoA hydratase domain containing 2 [Source:HGNC Symbol;Acc:HGNC:23408]	no	no	no	no
chr1	ENSG00000121454	biallelic	biallelic			biallelic	biallelic	4	0	1	LHX4	180230264	180278984	LIM homeobox 4 [Source:HGNC Symbol;Acc:HGNC:21734]	no	no	no	no
chr1	ENSG00000121753	biallelic	biallelic	biallelic	biallelic	biallelic	biallelic	6	0	1	ADGRB2	31727117	31764893	adhesion G protein-coupled receptor B2 [Source:HGNC Symbol;Acc:HGNC:944]	no	no	no	no
chr1	ENSG00000121766	biallelic	biallelic				biallelic	3	0	1	ZCCHC17	31296982	31364953	zinc finger CCHC-type containing 17 [Source:HGNC Symbol;Acc:HGNC:30246]	no	no	no	no
chr1	ENSG00000121903	biallelic	biallelic		biallelic			3	0	1	ZSCAN20	33472645	33501643	zinc finger and SCAN domain containing 20 [Source:HGNC Symbol;Acc:HGNC:13093]	no	no	no	no
chr1	ENSG00000121904	biallelic	biallelic			biallelic	biallelic	4	0	1	CSMD2	33513998	34165842	CUB and Sushi multiple domains 2 [Source:HGNC Symbol;Acc:HGNC:19290]	no	no	no	no
chr1	ENSG00000121931	biallelic	biallelic	biallelic	biallelic	biallelic	biallelic	6	0	1	LRIF1	110947190	110963965	ligand dependent nuclear receptor interacting factor 1 [Source:HGNC Symbol;Acc:HGNC:30299]	no	no	no	no
chr1	ENSG00000121940	biallelic	biallelic	biallelic	biallelic	biallelic	biallelic	6	0	1	CLCC1	108881885	108963527	chloride channel CLIC like 1 [Source:HGNC Symbol;Acc:HGNC:29675]	no	no	no	no
chr1	ENSG00000121957	biallelic	biallelic					2	0	1	GPSM2	108875350	108934545	G protein signaling modulator 2 [Source:HGNC Symbol;Acc:HGNC:29501]	no	no	no	no
chr1	ENSG00000122218	biallelic	biallelic					2	0	1	COPA	160288594	160343566	COPI coat complex subunit alpha [Source:HGNC Symbol;Acc:HGNC:2230]	no	no	no	no
chr1	ENSG00000122406	biallelic	biallelic					2	0	1	RPL5	92832013	92841924	ribosomal protein L5 [Source:HGNC Symbol;Acc:HGNC:10360]	no	no	no	no
chr1	ENSG00000122417	biallelic	biallelic	biallelic	biallelic	biallelic	biallelic	6	0	1	ODF2L	86346824	86396342	outer dense fiber of sperm tails 2 like [Source:HGNC Symbol;Acc:HGNC:29225]	no	no	no	no
chr1	ENSG00000122483	biallelic	biallelic	biallelic	biallelic			4	0	1	CCDC18	93179919	93278730	coiled-coil domain containing 18 [Source:HGNC Symbol;Acc:HGNC:30370]	no	no	no	no
chr1	ENSG00000123836	biallelic	biallelic					2	0	1	PFKFB2	207034366	207081024	6-phosphofructo-2-kinase/fructose-2,6-biphosphatase 2 [Source:HGNC Symbol;Acc:HGNC:8873]	no	no	no	no
chr1	ENSG00000125703	biallelic	biallelic					2	0	1	ATG4C	62784132	62865516	autophagy related 4C cysteine peptidase [Source:HGNC Symbol;Acc:HGNC:16040]	no	no	no	no
chr1	ENSG00000125945	biallelic		biallelic	biallelic	biallelic		4	0	1	ZNF436	23359448	23369836	zinc finger protein 436 [Source:HGNC Symbol;Acc:HGNC:20814]	no	no	no	no
chr1	ENSG00000126067	biallelic	biallelic					2	0	1	PSMB2	35599541	35641526	proteasome 20S subunit beta 2 [Source:HGNC Symbol;Acc:HGNC:9539]	no	no	no	no
chr1	ENSG00000126698	biallelic	biallelic	biallelic	biallelic	biallelic	biallelic	6	0	1	DNAJC8	28199456	28233029	DnaJ heat shock protein family (Hsp40) member C8 [Source:HGNC Symbol;Acc:HGNC:15470]	no	no	no	no
chr1	ENSG00000126705	biallelic	biallelic			biallelic	biallelic	4	0	1	AHDC1	27534035	27604431	AT-hook DNA binding motif containing 1 [Source:HGNC Symbol;Acc:HGNC:25230]	no	no	no	no
chr1	ENSG00000127054	biallelic	biallelic					2	0	1	INTS11	1311585	1324687	integrator complex subunit 11 [Source:HGNC Symbol;Acc:HGNC:26052]	no	no	no	no
chr1	ENSG00000127423	biallelic	biallelic					2	0	1	AUNIP	25831913	25859458	aurora kinase A and ninein interacting protein [Source:HGNC Symbol;Acc:HGNC:28363]	no	no	no	no
chr1	ENSG00000127463	biallelic	biallelic	biallelic	biallelic			4	0	1	EMC1	19215660	19251552	ER membrane protein complex subunit 1 [Source:HGNC Symbol;Acc:HGNC:28957]	no	no	no	no
chr1	ENSG00000127481	biallelic	biallelic	biallelic	biallelic	biallelic	biallelic	6	0	1	UBR4	19074510	19210266	ubiquitin protein ligase E3 component n-recognin 4 [Source:HGNC Symbol;Acc:HGNC:30313]	no	no	no	no
chr1	ENSG00000127603	biallelic	biallelic		biallelic	biallelic	biallelic	5	0	1	MACF1	39081316	39487177	microtubule actin crosslinking factor 1 [Source:HGNC Symbol;Acc:HGNC:13664]	no	no	no	no
chr1	ENSG00000130695	biallelic	biallelic	biallelic	biallelic	biallelic	biallelic	6	0	1	CEP85	26234200	26278808	centrosomal protein 85 [Source:HGNC Symbol;Acc:HGNC:25309]	no	no	no	no
chr1	ENSG00000130762	biallelic	biallelic	biallelic	biallelic			4	0	1	ARHGEF16	3454665	3481113	Rho guanine nucleotide exchange factor 16 [Source:HGNC Symbol;Acc:HGNC:15515]	no	no	no	no
chr1	ENSG00000130764	biallelic	biallelic			biallelic	biallelic	4	0	1	LRRC47	3778559	3796498	leucine rich repeat containing 47 [Source:HGNC Symbol;Acc:HGNC:29207]	no	no	no	no
chr1	ENSG00000130768	biallelic	biallelic	biallelic	biallelic	biallelic	biallelic	6	0	1	SMPDL3B	27935000	27959157	sphingomyelin phosphodiesterase acid like 3B [Source:HGNC Symbol;Acc:HGNC:21416]	no	no	no	no
chr1	ENSG00000130770	biallelic	biallelic	biallelic	biallelic	biallelic	biallelic	6	0	1	ATP5IF1	28236109	28246906	ATP synthase inhibitory factor subunit 1 [Source:HGNC Symbol;Acc:HGNC:871]	no	no	no	no
chr1	ENSG00000130775	biallelic	biallelic			biallelic	biallelic	4	0	1	THEMIS2	27872543	27886685	thymocyte selection associated family member 2 [Source:HGNC Symbol;Acc:HGNC:16839]	no	no	no	no
chr1	ENSG00000130939	biallelic						1	0	1	UBE4B	10032832	10181239	ubiquitination factor E4B [Source:HGNC Symbol;Acc:HGNC:12500]	no	no	no	no
chr1	ENSG00000130940	biallelic	biallelic					2	0	1	CASZ1	10636604	10796650	castor zinc finger 1 [Source:HGNC Symbol;Acc:HGNC:26002]	no	no	no	no
chr1	ENSG00000131238	biallelic	biallelic					2	0	1	PPT1	40072710	40097260	palmitoyl-protein thioesterase 1 [Source:HGNC Symbol;Acc:HGNC:9325]	no	no	no	no
chr1	ENSG00000131584	biallelic	biallelic			biallelic	biallelic	4	0	1	ACAP3	1292390	1309609	ArfGAP with coiled-coil, ankyrin repeat and PH domains 3 [Source:HGNC Symbol;Acc:HGNC:16754]	no	no	no	no
chr1	ENSG00000131591	biallelic	biallelic			biallelic	biallelic	4	0	1	C1orf159	1081818	1116361	chromosome 1 open reading frame 159 [Source:HGNC Symbol;Acc:HGNC:26062]	no	no	no	no
chr1	ENSG00000131697	biallelic	biallelic	biallelic	biallelic	biallelic	biallelic	6	0	1	NPHP4	5862811	5992473	nephrocystin 4 [Source:HGNC Symbol;Acc:HGNC:19104]	no	no	no	no
chr1	ENSG00000131778	biallelic	biallelic			biallelic	biallelic	4	0	1	CHD1L	147242654	147295765	chromodomain helicase DNA binding protein 1 like [Source:HGNC Symbol;Acc:HGNC:1916]	no	no	no	no
chr1	ENSG00000131788	biallelic	biallelic					2	0	1	PIAS3	145848522	145859836	protein inhibitor of activated STAT 3 [Source:HGNC Symbol;Acc:HGNC:16861]	no	no	no	no
chr1	ENSG00000132128	biallelic	biallelic					2	0	1	LRRC41	46261196	46303616	leucine rich repeat containing 41 [Source:HGNC Symbol;Acc:HGNC:16917]	no	no	no	no
chr1	ENSG00000132196	biallelic	biallelic	biallelic	biallelic			4	0	1	HSD17B7	162790702	162812823	hydroxysteroid 17-beta dehydrogenase 7 [Source:HGNC Symbol;Acc:HGNC:5215]	no	no	no	no
chr1	ENSG00000132676	biallelic	biallelic					2	0	1	DAP3	155687960	155739010	death associated protein 3 [Source:HGNC Symbol;Acc:HGNC:2673]	no	no	no	no
chr1	ENSG00000132680	biallelic	biallelic			biallelic	biallelic	4	0	1	KHDC4	155913045	155934413	KH domain containing 4, pre-mRNA splicing factor [Source:HGNC Symbol;Acc:HGNC:29145]	no	no	no	no
chr1	ENSG00000132688	biallelic	biallelic			biallelic	biallelic	4	0	1	NES	156668763	156677407	nestin [Source:HGNC Symbol;Acc:HGNC:7756]	no	no	no	no
chr1	ENSG00000132692	biallelic	biallelic			biallelic	biallelic	4	0	1	BCAN	156641390	156659532	brevican [Source:HGNC Symbol;Acc:HGNC:23059]	no	no	no	no
chr1	ENSG00000132694	biallelic	biallelic					2	0	1	ARHGEF11	156934840	157045742	Rho guanine nucleotide exchange factor 11 [Source:HGNC Symbol;Acc:HGNC:14580]	no	no	no	no
chr1	ENSG00000132718	biallelic	biallelic					2	0	1	SYT11	155859567	155885199	synaptotagmin 11 [Source:HGNC Symbol;Acc:HGNC:19239]	no	no	no	no
chr1	ENSG00000132768	biallelic	biallelic					2	0	1	DPH2	43970000	43973369	diphthamide biosynthesis 2 [Source:HGNC Symbol;Acc:HGNC:3004]	no	no	no	no
chr1	ENSG00000132780	biallelic	biallelic			biallelic	biallelic	4	0	1	NASP	45583846	45618904	nuclear autoantigenic sperm protein [Source:HGNC Symbol;Acc:HGNC:7644]	no	no	no	no
chr1	ENSG00000132781	biallelic	biallelic			biallelic		3	0	1	MUTYH	45329163	45340893	mutY DNA glycosylase [Source:HGNC Symbol;Acc:HGNC:7527]	no	no	no	no
chr1	ENSG00000132849	biallelic	biallelic	biallelic	biallelic	biallelic	biallelic	6	0	1	PATJ	61742477	62178675	PATJ crumbs cell polarity complex component [Source:HGNC Symbol;Acc:HGNC:28881]	no	no	no	no
chr1	ENSG00000132879	biallelic	biallelic					2	0	1	FBXO44	11654375	11663327	F-box protein 44 [Source:HGNC Symbol;Acc:HGNC:24847]	no	no	no	no
chr1	ENSG00000133056	biallelic	biallelic					2	0	1	PIK3C2B	204422628	204494805	phosphatidylinositol-4-phosphate 3-kinase catalytic subunit type 2 beta [Source:HGNC Symbol;Acc:HGNC:8972]	no	no	no	no
chr1	ENSG00000133216	biallelic	biallelic					2	0	1	EPHB2	22710839	22921500	EPH receptor B2 [Source:HGNC Symbol;Acc:HGNC:3393]	no	no	no	no
chr1	ENSG00000134186	biallelic				biallelic	biallelic	3	0	1	PRPF38B	108692310	108702928	pre-mRNA processing factor 38B [Source:HGNC Symbol;Acc:HGNC:25512]	no	no	no	no
chr1	ENSG00000134198	biallelic	biallelic	biallelic	biallelic	biallelic	biallelic	6	0	1	TSPAN2	115048011	115089503	tetraspanin 2 [Source:HGNC Symbol;Acc:HGNC:20659]	no	no	no	no
chr1	ENSG00000134215	biallelic	biallelic	biallelic	biallelic			4	0	1	VAV3	107571161	107965180	vav guanine nucleotide exchange factor 3 [Source:HGNC Symbol;Acc:HGNC:12659]	no	no	no	no
chr1	ENSG00000134247	biallelic	biallelic			biallelic	biallelic	4	0	1	PTGFRN	116909916	116990353	prostaglandin F2 receptor inhibitor [Source:HGNC Symbol;Acc:HGNC:9601]	no	no	no	no
chr1	ENSG00000134248	biallelic	biallelic			biallelic		3	0	1	LAMTOR5	110401249	110407942	late endosomal/lysosomal adaptor, MAPK and MTOR activator 5 [Source:HGNC Symbol;Acc:HGNC:17955]	no	no	no	no
chr1	ENSG00000134250	biallelic	biallelic	biallelic	biallelic		biallelic	5	0	1	NOTCH2	119911553	120100779	notch receptor 2 [Source:HGNC Symbol;Acc:HGNC:7882]	no	no	no	no
chr1	ENSG00000134369	biallelic	biallelic					2	0	1	NAV1	201539127	201826969	neuron navigator 1 [Source:HGNC Symbol;Acc:HGNC:15989]	no	no	no	no
chr1	ENSG00000134375	biallelic	biallelic					2	0	1	TIMM17A	201955503	201970664	translocase of inner mitochondrial membrane 17A [Source:HGNC Symbol;Acc:HGNC:17315]	no	no	no	no
chr1	ENSG00000134644	biallelic	biallelic			biallelic	biallelic	4	0	1	PUM1	30931506	31065991	pumilio RNA binding family member 1 [Source:HGNC Symbol;Acc:HGNC:14957]	no	no	no	no
chr1	ENSG00000134684	biallelic	biallelic			biallelic	biallelic	4	0	1	YARS1	32775237	32818031	tyrosyl-tRNA synthetase 1 [Source:HGNC Symbol;Acc:HGNC:12840]	no	no	no	no
chr1	ENSG00000134690	biallelic	biallelic			biallelic	biallelic	4	0	1	CDCA8	37692481	37709719	cell division cycle associated 8 [Source:HGNC Symbol;Acc:HGNC:14629]	no	no	no	no
chr1	ENSG00000134698	biallelic	biallelic					2	0	1	AGO4	35808016	35857890	argonaute RISC component 4 [Source:HGNC Symbol;Acc:HGNC:18424]	no	no	no	no
chr1	ENSG00000134744	biallelic	biallelic	biallelic	biallelic			4	0	1	TUT4	52408282	52553487	terminal uridylyl transferase 4 [Source:HGNC Symbol;Acc:HGNC:28981]	no	no	no	no
chr1	ENSG00000134748	biallelic	biallelic	biallelic	biallelic			4	0	1	PRPF38A	52404602	52420836	pre-mRNA processing factor 38A [Source:HGNC Symbol;Acc:HGNC:25930]	no	no	no	no
chr1	ENSG00000135749	biallelic	biallelic	biallelic	biallelic			4	0	1	PCNX2	232983435	233295725	pecanex 2 [Source:HGNC Symbol;Acc:HGNC:8736]	no	no	no	no
chr1	ENSG00000135766	biallelic	biallelic					2	0	1	EGLN1	231363751	231422287	egl-9 family hypoxia inducible factor 1 [Source:HGNC Symbol;Acc:HGNC:1232]	no	no	no	no
chr1	ENSG00000135775	biallelic	biallelic					2	0	1	COG2	230642481	230693982	component of oligomeric golgi complex 2 [Source:HGNC Symbol;Acc:HGNC:6546]	no	no	no	no
chr1	ENSG00000135776	biallelic	biallelic			biallelic	biallelic	4	0	1	ABCB10	229516582	229558707	ATP binding cassette subfamily B member 10 [Source:HGNC Symbol;Acc:HGNC:41]	no	no	no	no
chr1	ENSG00000135778	biallelic	biallelic	biallelic	biallelic			4	0	1	NTPCR	232950605	232983882	nucleoside-triphosphatase, cancer-related [Source:HGNC Symbol;Acc:HGNC:28204]	no	no	no	no
chr1	ENSG00000135801	biallelic	biallelic					2	0	1	TAF5L	229593134	229626122	TATA-box binding protein associated factor 5 like [Source:HGNC Symbol;Acc:HGNC:17304]	no	no	no	no
chr1	ENSG00000135829	biallelic	biallelic		biallelic	biallelic	biallelic	5	0	1	DHX9	182839347	182887982	DExH-box helicase 9 [Source:HGNC Symbol;Acc:HGNC:2750]	no	no	no	no
chr1	ENSG00000135835	biallelic	biallelic		biallelic			3	0	1	KIAA1614	180912897	180951614	KIAA1614 [Source:HGNC Symbol;Acc:HGNC:29327]	no	no	no	no
chr1	ENSG00000135837	biallelic	biallelic	biallelic	biallelic			4	0	1	CEP350	179954674	180114880	centrosomal protein 350 [Source:HGNC Symbol;Acc:HGNC:24238]	no	no	no	no
chr1	ENSG00000135842	biallelic	biallelic	biallelic	biallelic	biallelic	biallelic	6	0	1	NIBAN1	184790724	184974508	niban apoptosis regulator 1 [Source:HGNC Symbol;Acc:HGNC:16784]	no	no	no	no
chr1	ENSG00000135845	biallelic	biallelic	biallelic	biallelic			4	0	1	PIGC	172370189	172444086	phosphatidylinositol glycan anchor biosynthesis class C [Source:HGNC Symbol;Acc:HGNC:8960]	no	no	no	no
chr1	ENSG00000135862	biallelic	biallelic	biallelic	biallelic	biallelic	biallelic	6	0	1	LAMC1	183023420	183145592	laminin subunit gamma 1 [Source:HGNC Symbol;Acc:HGNC:6492]	no	no	no	no
chr1	ENSG00000135870	biallelic	biallelic			biallelic		3	0	1	RC3H1	173931084	174022357	ring finger and CCCH-type domains 1 [Source:HGNC Symbol;Acc:HGNC:29434]	no	no	no	no
chr1	ENSG00000136636	biallelic	biallelic	biallelic	biallelic	biallelic	biallelic	6	0	1	KCTD3	215567304	215621807	potassium channel tetramerization domain containing 3 [Source:HGNC Symbol;Acc:HGNC:21305]	no	no	no	no
chr1	ENSG00000137936	biallelic	biallelic	biallelic	biallelic			4	0	1	BCAR3	93561741	93847150	BCAR3 adaptor protein, NSP family member [Source:HGNC Symbol;Acc:HGNC:973]	no	no	no	no
chr1	ENSG00000137944	biallelic	biallelic			biallelic	biallelic	4	0	1	KYAT3	88935773	88992953	kynurenine aminotransferase 3 [Source:HGNC Symbol;Acc:HGNC:33238]	no	no	no	no
chr1	ENSG00000137955	biallelic	biallelic	biallelic	biallelic			4	0	1	RABGGTB	75786197	75795086	Rab geranylgeranyltransferase subunit beta [Source:HGNC Symbol;Acc:HGNC:9796]	no	no	no	no
chr1	ENSG00000137968	biallelic	biallelic	biallelic	biallelic			4	0	1	SLC44A5	75202129	75611114	solute carrier family 44 member 5 [Source:HGNC Symbol;Acc:HGNC:28524]	no	no	no	no
chr1	ENSG00000142599	biallelic	biallelic			biallelic	biallelic	4	0	1	RERE	8352397	8848921	arginine-glutamic acid dipeptide repeats [Source:HGNC Symbol;Acc:HGNC:9965]	no	no	no	no
chr1	ENSG00000142619	biallelic	biallelic	biallelic	biallelic	biallelic	biallelic	6	0	1	PADI3	17249098	17284233	peptidyl arginine deiminase 3 [Source:HGNC Symbol;Acc:HGNC:18337]	no	no	no	no
chr1	ENSG00000142621	biallelic	biallelic		biallelic	biallelic		4	0	1	FHAD1	15236521	15400283	forkhead associated phosphopeptide binding domain 1 [Source:HGNC Symbol;Acc:HGNC:29408]	no	no	no	no
chr1	ENSG00000142627	biallelic	biallelic	biallelic	biallelic			4	0	1	EPHA2	16124337	16156069	EPH receptor A2 [Source:HGNC Symbol;Acc:HGNC:3386]	no	no	no	no
chr1	ENSG00000142632	biallelic		biallelic	biallelic			3	0	1	ARHGEF19	16197854	16212652	Rho guanine nucleotide exchange factor 19 [Source:HGNC Symbol;Acc:HGNC:26604]	no	no	no	no
chr1	ENSG00000142634	biallelic	biallelic					2	0	1	EFHD2	15409888	15430339	EF-hand domain family member D2 [Source:HGNC Symbol;Acc:HGNC:28670]	no	no	no	no
chr1	ENSG00000142657	biallelic	biallelic					2	0	1	PGD	10398592	10420511	phosphogluconate dehydrogenase [Source:HGNC Symbol;Acc:HGNC:8891]	no	no	no	no
chr1	ENSG00000142675	biallelic	biallelic					2	0	1	CNKSR1	26177484	26189884	connector enhancer of kinase suppressor of Ras 1 [Source:HGNC Symbol;Acc:HGNC:19700]	no	no	no	no
chr1	ENSG00000142698	biallelic	biallelic	biallelic	biallelic		biallelic	5	0	1	C1orf94	34166883	34219131	chromosome 1 open reading frame 94 [Source:HGNC Symbol;Acc:HGNC:28250]	no	no	no	no
chr1	ENSG00000142765	biallelic	biallelic			biallelic	biallelic	4	0	1	SYTL1	27342020	27353937	synaptotagmin like 1 [Source:HGNC Symbol;Acc:HGNC:15584]	no	no	no	no
chr1	ENSG00000142798	biallelic	biallelic	biallelic	biallelic	biallelic	biallelic	6	0	1	HSPG2	21822244	21937310	heparan sulfate proteoglycan 2 [Source:HGNC Symbol;Acc:HGNC:5273]	no	no	no	no
chr1	ENSG00000142856	biallelic	biallelic	biallelic	biallelic	biallelic	biallelic	6	0	1	ITGB3BP	63440770	63593721	integrin subunit beta 3 binding protein [Source:HGNC Symbol;Acc:HGNC:6157]	no	no	no	no
chr1	ENSG00000142867	biallelic	biallelic	biallelic	biallelic			4	0	1	BCL10	85265776	85276632	BCL10 immune signaling adaptor [Source:HGNC Symbol;Acc:HGNC:989]	no	no	no	no
chr1	ENSG00000142871	biallelic	biallelic	biallelic	biallelic			4	0	1	CCN1	85580761	85584589	cellular communication network factor 1 [Source:HGNC Symbol;Acc:HGNC:2654]	no	no	no	no
chr1	ENSG00000142892	biallelic	biallelic					2	0	1	PIGK	77088989	77219430	phosphatidylinositol glycan anchor biosynthesis class K [Source:HGNC Symbol;Acc:HGNC:8965]	no	no	no	no
chr1	ENSG00000142945	biallelic	biallelic	biallelic	biallelic	biallelic	biallelic	6	0	1	KIF2C	44739818	44767767	kinesin family member 2C [Source:HGNC Symbol;Acc:HGNC:6393]	no	no	no	no
chr1	ENSG00000142949	biallelic	biallelic	biallelic	biallelic	biallelic	biallelic	6	0	1	PTPRF	43525187	43623666	protein tyrosine phosphatase receptor type F [Source:HGNC Symbol;Acc:HGNC:9670]	no	no	no	no
chr1	ENSG00000142961	biallelic	biallelic			biallelic	biallelic	4	0	1	MOB3C	46607719	46616811	MOB kinase activator 3C [Source:HGNC Symbol;Acc:HGNC:29800]	no	no	no	no
chr1	ENSG00000143036	biallelic	biallelic			biallelic	biallelic	4	0	1	SLC44A3	94820342	94895246	solute carrier family 44 member 3 [Source:HGNC Symbol;Acc:HGNC:28689]	no	no	no	no
chr1	ENSG00000143061	biallelic	biallelic	biallelic	biallelic	biallelic		5	0	1	IGSF3	116574399	116667755	immunoglobulin superfamily member 3 [Source:HGNC Symbol;Acc:HGNC:5950]	no	no	no	no
chr1	ENSG00000143067	biallelic	biallelic			biallelic	biallelic	4	0	1	ZNF697	119619377	119648266	zinc finger protein 697 [Source:HGNC Symbol;Acc:HGNC:32034]	no	no	no	no
chr1	ENSG00000143093	biallelic	biallelic					2	0	1	STRIP1	110031577	110074641	striatin interacting protein 1 [Source:HGNC Symbol;Acc:HGNC:25916]	no	no	no	no
chr1	ENSG00000143106	biallelic	biallelic					2	0	1	PSMA5	109399042	109426448	proteasome 20S subunit alpha 5 [Source:HGNC Symbol;Acc:HGNC:9534]	no	no	no	no
chr1	ENSG00000143110	biallelic	biallelic					2	0	1	C1orf162	111473792	111478512	chromosome 1 open reading frame 162 [Source:HGNC Symbol;Acc:HGNC:28344]	no	no	no	no
chr1	ENSG00000143126	biallelic	biallelic	biallelic	biallelic	biallelic	biallelic	6	0	1	CELSR2	109249539	109275751	cadherin EGF LAG seven-pass G-type receptor 2 [Source:HGNC Symbol;Acc:HGNC:3231]	no	no	no	no
chr1	ENSG00000143147	biallelic	biallelic			biallelic	biallelic	4	0	1	GPR161	168079542	168137667	G protein-coupled receptor 161 [Source:HGNC Symbol;Acc:HGNC:23694]	no	no	no	no
chr1	ENSG00000143149	biallelic	biallelic			biallelic	biallelic	4	0	1	ALDH9A1	165662216	165698562	aldehyde dehydrogenase 9 family member A1 [Source:HGNC Symbol;Acc:HGNC:412]	no	no	no	no
chr1	ENSG00000143156	biallelic	biallelic					2	0	1	NME7	169132531	169367948	NME/NM23 family member 7 [Source:HGNC Symbol;Acc:HGNC:20461]	no	no	no	no
chr1	ENSG00000143164	biallelic	biallelic			biallelic	biallelic	4	0	1	DCAF6	167935783	168075843	DDB1 and CUL4 associated factor 6 [Source:HGNC Symbol;Acc:HGNC:30002]	no	no	no	no
chr1	ENSG00000143178	biallelic	biallelic	biallelic	biallelic			4	0	1	TBX19	168280877	168314426	T-box transcription factor 19 [Source:HGNC Symbol;Acc:HGNC:11596]	no	no	no	no
chr1	ENSG00000143183	biallelic	biallelic					2	0	1	TMCO1	165724293	165827755	transmembrane and coiled-coil domains 1 [Source:HGNC Symbol;Acc:HGNC:18188]	no	no	no	no
chr1	ENSG00000143198	biallelic			biallelic			2	0	1	MGST3	165631213	165661796	microsomal glutathione S-transferase 3 [Source:HGNC Symbol;Acc:HGNC:7064]	no	no	no	no
chr1	ENSG00000143207	biallelic	biallelic					2	0	1	COP1	175944831	176207286	COP1 E3 ubiquitin ligase [Source:HGNC Symbol;Acc:HGNC:17440]	no	no	no	no
chr1	ENSG00000143228	biallelic	biallelic			biallelic	biallelic	4	0	1	NUF2	163266576	163355764	NUF2 component of NDC80 kinetochore complex [Source:HGNC Symbol;Acc:HGNC:14621]	no	no	no	no
chr1	ENSG00000143303	biallelic	biallelic					2	0	1	METTL25B	156728442	156736960	methyltransferase like 25B [Source:HGNC Symbol;Acc:HGNC:24273]	no	no	no	no
chr1	ENSG00000143319	biallelic	biallelic	biallelic	biallelic			4	0	1	ISG20L2	156721891	156728766	interferon stimulated exonuclease gene 20 like 2 [Source:HGNC Symbol;Acc:HGNC:25745]	no	no	no	no
chr1	ENSG00000143321	biallelic	biallelic	biallelic	biallelic	biallelic	biallelic	6	0	1	HDGF	156742109	156766925	heparin binding growth factor [Source:HGNC Symbol;Acc:HGNC:4856]	no	no	no	no
chr1	ENSG00000143337	biallelic	biallelic	biallelic	biallelic			4	0	1	TOR1AIP1	179882042	179920077	torsin 1A interacting protein 1 [Source:HGNC Symbol;Acc:HGNC:29456]	no	no	no	no
chr1	ENSG00000143341	biallelic	biallelic	biallelic	biallelic	biallelic	biallelic	6	0	1	HMCN1	185734391	186190949	hemicentin 1 [Source:HGNC Symbol;Acc:HGNC:19194]	no	no	no	no
chr1	ENSG00000143363	biallelic	biallelic			biallelic	biallelic	4	0	1	PRUNE1	151008420	151035713	prune exopolyphosphatase 1 [Source:HGNC Symbol;Acc:HGNC:13420]	no	no	no	no
chr1	ENSG00000143367	biallelic	biallelic			biallelic	biallelic	4	0	1	TUFT1	151540305	151583583	tuftelin 1 [Source:HGNC Symbol;Acc:HGNC:12422]	no	no	no	no
chr1	ENSG00000143373	biallelic	biallelic			biallelic	biallelic	4	0	1	ZNF687	151281618	151292176	zinc finger protein 687 [Source:HGNC Symbol;Acc:HGNC:29277]	no	no	no	no
chr1	ENSG00000143375	biallelic	biallelic			biallelic	biallelic	4	0	1	CGN	151510510	151538692	cingulin [Source:HGNC Symbol;Acc:HGNC:17429]	no	no	no	no
chr1	ENSG00000143384	biallelic	biallelic					2	0	1	MCL1	150560895	150579738	MCL1 apoptosis regulator, BCL2 family member [Source:HGNC Symbol;Acc:HGNC:6943]	no	no	no	no
chr1	ENSG00000143393	biallelic	biallelic					2	0	1	PI4KB	151291797	151327715	phosphatidylinositol 4-kinase beta [Source:HGNC Symbol;Acc:HGNC:8984]	no	no	no	no
chr1	ENSG00000143398	biallelic	biallelic					2	0	1	PIP5K1A	151197949	151249536	phosphatidylinositol-4-phosphate 5-kinase type 1 alpha [Source:HGNC Symbol;Acc:HGNC:8994]	no	no	no	no
chr1	ENSG00000143434	biallelic	biallelic			biallelic	biallelic	4	0	1	SEMA6C	151131685	151146631	semaphorin 6C [Source:HGNC Symbol;Acc:HGNC:10740]	no	no	no	no
chr1	ENSG00000143437	biallelic	biallelic					2	0	1	ARNT	150809713	150876708	aryl hydrocarbon receptor nuclear translocator [Source:HGNC Symbol;Acc:HGNC:700]	no	no	no	no
chr1	ENSG00000143442	biallelic	biallelic					2	0	1	POGZ	151402724	151459494	pogo transposable element derived with ZNF domain [Source:HGNC Symbol;Acc:HGNC:18801]	no	no	no	no
chr1	ENSG00000143443	biallelic	biallelic					2	0	1	C1orf56	151047751	151051986	chromosome 1 open reading frame 56 [Source:HGNC Symbol;Acc:HGNC:26045]	no	no	no	no
chr1	ENSG00000143458	biallelic						1	0	1	GABPB2	151070578	151125542	GA binding protein transcription factor subunit beta 2 [Source:HGNC Symbol;Acc:HGNC:28441]	no	no	no	no
chr1	ENSG00000143493	biallelic	biallelic	biallelic	biallelic			4	0	1	INTS7	211940399	212035557	integrator complex subunit 7 [Source:HGNC Symbol;Acc:HGNC:24484]	no	no	no	no
chr1	ENSG00000143494	biallelic	biallelic			biallelic	biallelic	4	0	1	VASH2	212950520	212992037	vasohibin 2 [Source:HGNC Symbol;Acc:HGNC:25723]	no	no	no	no
chr1	ENSG00000143498	biallelic	biallelic	biallelic	biallelic			4	0	1	TAF1A	222557902	222589933	TATA-box binding protein associated factor, RNA polymerase I subunit A [Source:HGNC Symbol;Acc:HGNC:11532]	no	no	no	no
chr1	ENSG00000143514	biallelic	biallelic			biallelic	biallelic	4	0	1	TP53BP2	223779893	223845954	tumor protein p53 binding protein 2 [Source:HGNC Symbol;Acc:HGNC:12000]	no	no	no	no
chr1	ENSG00000143537	biallelic	biallelic	biallelic	biallelic			4	0	1	ADAM15	155050566	155062775	ADAM metallopeptidase domain 15 [Source:HGNC Symbol;Acc:HGNC:193]	no	no	no	no
chr1	ENSG00000143554	biallelic	biallelic	biallelic	biallelic			4	0	1	SLC27A3	153774354	153780157	solute carrier family 27 member 3 [Source:HGNC Symbol;Acc:HGNC:10997]	no	no	no	no
chr1	ENSG00000143569	biallelic	biallelic	biallelic	biallelic	biallelic	biallelic	6	0	1	UBAP2L	154220179	154271510	ubiquitin associated protein 2 like [Source:HGNC Symbol;Acc:HGNC:29877]	no	no	no	no
chr1	ENSG00000143622	biallelic	biallelic			biallelic	biallelic	4	0	1	RIT1	155897808	155911404	Ras like without CAAX 1 [Source:HGNC Symbol;Acc:HGNC:10023]	no	no	no	no
chr1	ENSG00000143624	biallelic	biallelic	biallelic	biallelic			4	0	1	INTS3	153728050	153774808	integrator complex subunit 3 [Source:HGNC Symbol;Acc:HGNC:26153]	no	no	no	no
chr1	ENSG00000143633	biallelic	biallelic			biallelic	biallelic	4	0	1	C1orf131	231223763	231241187	chromosome 1 open reading frame 131 [Source:HGNC Symbol;Acc:HGNC:25332]	no	no	no	no
chr1	ENSG00000143641	biallelic	biallelic					2	0	1	GALNT2	230057990	230282122	polypeptide N-acetylgalactosaminyltransferase 2 [Source:HGNC Symbol;Acc:HGNC:4124]	no	no	no	no
chr1	ENSG00000143643	biallelic	biallelic	biallelic	biallelic	biallelic	biallelic	6	0	1	TTC13	230906243	230978875	tetratricopeptide repeat domain 13 [Source:HGNC Symbol;Acc:HGNC:26204]	no	no	no	no
chr1	ENSG00000143674	biallelic	biallelic	biallelic	biallelic	biallelic	biallelic	6	0	1	MAP3K21	233327724	233385148	mitogen-activated protein kinase kinase kinase 21 [Source:HGNC Symbol;Acc:HGNC:29798]	no	no	no	no
chr1	ENSG00000143740	biallelic	biallelic	biallelic	biallelic			4	0	1	SNAP47	227728200	227781826	synaptosome associated protein 47 [Source:HGNC Symbol;Acc:HGNC:30669]	no	no	no	no
chr1	ENSG00000143748	biallelic	biallelic	biallelic	biallelic			4	0	1	NVL	224227334	224330189	nuclear VCP like [Source:HGNC Symbol;Acc:HGNC:8070]	no	no	no	no
chr1	ENSG00000143772	biallelic	biallelic			biallelic	biallelic	4	0	1	ITPKB	226631690	226739323	inositol-trisphosphate 3-kinase B [Source:HGNC Symbol;Acc:HGNC:6179]	no	no	no	no
chr1	ENSG00000143799	biallelic	biallelic			biallelic	biallelic	4	0	1	PARP1	226360210	226408154	poly(ADP-ribose) polymerase 1 [Source:HGNC Symbol;Acc:HGNC:270]	no	no	no	no
chr1	ENSG00000143815	biallelic	biallelic	biallelic	biallelic	biallelic	biallelic	6	0	1	LBR	225401502	225428925	lamin B receptor [Source:HGNC Symbol;Acc:HGNC:6518]	no	no	no	no
chr1	ENSG00000143819	biallelic	biallelic			biallelic	biallelic	4	0	1	EPHX1	225810124	225845563	epoxide hydrolase 1 [Source:HGNC Symbol;Acc:HGNC:3401]	no	no	no	no
chr1	ENSG00000143842	biallelic	biallelic					2	0	1	SOX13	204073115	204127743	SRY-box transcription factor 13 [Source:HGNC Symbol;Acc:HGNC:11192]	no	no	no	no
chr1	ENSG00000143845	biallelic	biallelic			biallelic	biallelic	4	0	1	ETNK2	204131062	204152044	ethanolamine kinase 2 [Source:HGNC Symbol;Acc:HGNC:25575]	no	no	no	no
chr1	ENSG00000143847	biallelic	biallelic			biallelic	biallelic	4	0	1	PPFIA4	203026491	203078740	PTPRF interacting protein alpha 4 [Source:HGNC Symbol;Acc:HGNC:9248]	no	no	no	no
chr1	ENSG00000143850	biallelic	biallelic	biallelic	biallelic	biallelic	biallelic	6	0	1	PLEKHA6	204218853	204377665	pleckstrin homology domain containing A6 [Source:HGNC Symbol;Acc:HGNC:17053]	no	no	no	no
chr1	ENSG00000143858	biallelic	biallelic	biallelic	biallelic	biallelic	biallelic	6	0	1	SYT2	202590596	202710454	synaptotagmin 2 [Source:HGNC Symbol;Acc:HGNC:11510]	no	no	no	no
chr1	ENSG00000143862	biallelic	biallelic					2	0	1	ARL8A	202133404	202144743	ADP ribosylation factor like GTPase 8A [Source:HGNC Symbol;Acc:HGNC:25192]	no	no	no	no
chr1	ENSG00000146463	biallelic	biallelic	biallelic	biallelic			4	0	1	ZMYM4	35268709	35422058	zinc finger MYM-type containing 4 [Source:HGNC Symbol;Acc:HGNC:13055]	no	no	no	no
chr1	ENSG00000152061	biallelic	biallelic		biallelic			3	0	1	RABGAP1L	174159410	174995308	RAB GTPase activating protein 1 like [Source:HGNC Symbol;Acc:HGNC:24663]	no	no	no	no
chr1	ENSG00000152760	biallelic		biallelic				2	0	1	DYNLT5	66752459	66779047	dynein light chain Tctex-type family member 5 [Source:HGNC Symbol;Acc:HGNC:26882]	no	no	no	no
chr1	ENSG00000153187	biallelic	biallelic	biallelic	biallelic			4	0	1	HNRNPU	244840638	244864560	heterogeneous nuclear ribonucleoprotein U [Source:HGNC Symbol;Acc:HGNC:5048]	no	no	no	no
chr1	ENSG00000153904	biallelic	biallelic	biallelic	biallelic			4	0	1	DDAH1	85318481	85578363	dimethylarginine dimethylaminohydrolase 1 [Source:HGNC Symbol;Acc:HGNC:2715]	no	no	no	no
chr1	ENSG00000154027	biallelic	biallelic	biallelic	biallelic			4	0	1	AK5	77282019	77559966	adenylate kinase 5 [Source:HGNC Symbol;Acc:HGNC:365]	no	no	no	no
chr1	ENSG00000154305	biallelic	biallelic	biallelic	biallelic	biallelic	biallelic	6	0	1	MIA3	222618097	222668007	MIA SH3 domain ER export factor 3 [Source:HGNC Symbol;Acc:HGNC:24008]	no	no	no	no
chr1	ENSG00000154309	biallelic	biallelic	biallelic	biallelic			4	0	1	DISP1	222815022	223005995	dispatched RND transporter family member 1 [Source:HGNC Symbol;Acc:HGNC:19711]	no	no	no	no
chr1	ENSG00000154358	biallelic	biallelic	biallelic	biallelic	biallelic	biallelic	6	0	1	OBSCN	228208044	228378876	obscurin, cytoskeletal calmodulin and titin-interacting RhoGEF [Source:HGNC Symbol;Acc:HGNC:15719]	no	no	no	no
chr1	ENSG00000154380	biallelic	biallelic					2	0	1	ENAH	225486765	225653142	ENAH actin regulator [Source:HGNC Symbol;Acc:HGNC:18271]	no	no	no	no
chr1	ENSG00000154429	biallelic	biallelic					2	0	1	CCSAP	229321011	229343294	centriole, cilia and spindle associated protein [Source:HGNC Symbol;Acc:HGNC:29578]	no	no	no	no
chr1	ENSG00000155363	biallelic	biallelic					2	0	1	MOV10	112673141	112700756	Mov10 RISC complex RNA helicase [Source:HGNC Symbol;Acc:HGNC:7200]	no	no	no	no
chr1	ENSG00000155367	biallelic	biallelic	biallelic	biallelic			4	0	1	PPM1J	112709994	112715332	protein phosphatase, Mg2+/Mn2+ dependent 1J [Source:HGNC Symbol;Acc:HGNC:20785]	no	no	no	no
chr1	ENSG00000155380	biallelic	biallelic	biallelic	biallelic	biallelic	biallelic	6	0	1	SLC16A1	112911847	112957593	solute carrier family 16 member 1 [Source:HGNC Symbol;Acc:HGNC:10922]	no	no	no	no
chr1	ENSG00000155816	biallelic					biallelic	2	0	1	FMN2	240014348	240475187	formin 2 [Source:HGNC Symbol;Acc:HGNC:14074]	no	no	no	no
chr1	ENSG00000156869	biallelic	biallelic					2	0	1	FRRS1	99703970	99766635	ferric chelate reductase 1 [Source:HGNC Symbol;Acc:HGNC:27622]	no	no	no	no
chr1	ENSG00000156876	biallelic	biallelic	biallelic	biallelic	biallelic	biallelic	6	0	1	SASS6	100083563	100132955	SAS-6 centriolar assembly protein [Source:HGNC Symbol;Acc:HGNC:25403]	no	no	no	no
chr1	ENSG00000157077	biallelic	biallelic	biallelic	biallelic	biallelic	biallelic	6	0	1	ZFYVE9	52142089	52348671	zinc finger FYVE-type containing 9 [Source:HGNC Symbol;Acc:HGNC:6775]	no	no	no	no
chr1	ENSG00000157181	biallelic	biallelic					2	0	1	ODR4	186375838	186421378	odr-4 GPCR localization factor homolog [Source:HGNC Symbol;Acc:HGNC:24299]	no	no	no	no
chr1	ENSG00000157184	biallelic	biallelic					2	0	1	CPT2	53196792	53214197	carnitine palmitoyltransferase 2 [Source:HGNC Symbol;Acc:HGNC:2330]	no	no	no	no
chr1	ENSG00000157193	biallelic	biallelic					2	0	1	LRP8	53242364	53328469	LDL receptor related protein 8 [Source:HGNC Symbol;Acc:HGNC:6700]	no	no	no	no
chr1	ENSG00000157216	biallelic	biallelic					2	0	1	SSBP3	54225432	54413479	single stranded DNA binding protein 3 [Source:HGNC Symbol;Acc:HGNC:15674]	no	no	no	no
chr1	ENSG00000157881	biallelic	biallelic			biallelic	biallelic	4	0	1	PANK4	2508537	2526597	pantothenate kinase 4 (inactive) [Source:HGNC Symbol;Acc:HGNC:19366]	no	no	no	no
chr1	ENSG00000157911	biallelic	biallelic	biallelic	biallelic	biallelic	biallelic	6	0	1	PEX10	2403964	2413797	peroxisomal biogenesis factor 10 [Source:HGNC Symbol;Acc:HGNC:8851]	no	no	no	no
chr1	ENSG00000157933	biallelic	biallelic			biallelic		3	0	1	SKI	2227388	2310213	SKI proto-oncogene [Source:HGNC Symbol;Acc:HGNC:10896]	no	no	no	no
chr1	ENSG00000158156	biallelic	biallelic					2	0	1	XKR8	27959588	27968093	XK related 8 [Source:HGNC Symbol;Acc:HGNC:25508]	no	no	no	no
chr1	ENSG00000158246	biallelic	biallelic					2	0	1	TENT5B	27005020	27012850	terminal nucleotidyltransferase 5B [Source:HGNC Symbol;Acc:HGNC:28273]	no	no	no	no
chr1	ENSG00000158315	biallelic						1	0	1	RHBDL2	38885807	38941830	rhomboid like 2 [Source:HGNC Symbol;Acc:HGNC:16083]	no	no	no	no
chr1	ENSG00000158615	biallelic	biallelic	biallelic	biallelic	biallelic	biallelic	6	0	1	PPP1R15B	204396492	204411887	protein phosphatase 1 regulatory subunit 15B [Source:HGNC Symbol;Acc:HGNC:14951]	no	no	no	no
chr1	ENSG00000158710	biallelic	biallelic					2	0	1	TAGLN2	159918107	159925507	transgelin 2 [Source:HGNC Symbol;Acc:HGNC:11554]	no	no	no	no
chr1	ENSG00000158716	biallelic						1	0	1	DUSP23	159780932	159782543	dual specificity phosphatase 23 [Source:HGNC Symbol;Acc:HGNC:21480]	no	no	no	no
chr1	ENSG00000158793	biallelic	biallelic					2	0	1	NIT1	161118086	161125445	nitrilase 1 [Source:HGNC Symbol;Acc:HGNC:7828]	no	no	no	no
chr1	ENSG00000158828	biallelic	biallelic			biallelic	biallelic	4	0	1	PINK1	20633458	20651511	PTEN induced kinase 1 [Source:HGNC Symbol;Acc:HGNC:14581]	no	no	no	no
chr1	ENSG00000158850	biallelic	biallelic			biallelic		3	0	1	B4GALT3	161171310	161177968	beta-1,4-galactosyltransferase 3 [Source:HGNC Symbol;Acc:HGNC:926]	no	no	no	no
chr1	ENSG00000158859	biallelic	biallelic	biallelic	biallelic	biallelic	biallelic	6	0	1	ADAMTS4	161184302	161199054	ADAM metallopeptidase with thrombospondin type 1 motif 4 [Source:HGNC Symbol;Acc:HGNC:220]	no	no	no	no
chr1	ENSG00000158864	biallelic	biallelic			biallelic	biallelic	4	0	1	NDUFS2	161197104	161214723	NADH:ubiquinone oxidoreductase core subunit S2 [Source:HGNC Symbol;Acc:HGNC:7708]	no	no	no	no
chr1	ENSG00000158882	biallelic	biallelic	biallelic	biallelic			4	0	1	TOMM40L	161225939	161230746	translocase of outer mitochondrial membrane 40 like [Source:HGNC Symbol;Acc:HGNC:25756]	no	no	no	no
chr1	ENSG00000159208	biallelic	biallelic					2	0	1	CIART	150282543	150287093	circadian associated repressor of transcription [Source:HGNC Symbol;Acc:HGNC:25200]	no	no	no	no
chr1	ENSG00000159348	biallelic	biallelic			biallelic	biallelic	4	0	1	CYB5R1	202961873	202967275	cytochrome b5 reductase 1 [Source:HGNC Symbol;Acc:HGNC:13397]	no	no	no	no
chr1	ENSG00000159352	biallelic	biallelic					2	0	1	PSMD4	151254709	151267479	proteasome 26S subunit ubiquitin receptor, non-ATPase 4 [Source:HGNC Symbol;Acc:HGNC:9561]	no	no	no	no
chr1	ENSG00000159363	biallelic	biallelic	biallelic	biallelic			4	0	1	ATP13A2	16985958	17011928	ATPase cation transporting 13A2 [Source:HGNC Symbol;Acc:HGNC:30213]	no	no	no	no
chr1	ENSG00000159377	biallelic	biallelic					2	0	1	PSMB4	151399560	151401937	proteasome 20S subunit beta 4 [Source:HGNC Symbol;Acc:HGNC:9541]	no	no	no	no
chr1	ENSG00000159423	biallelic	biallelic	biallelic	biallelic	biallelic	biallelic	6	0	1	ALDH4A1	18871430	18902724	aldehyde dehydrogenase 4 family member A1 [Source:HGNC Symbol;Acc:HGNC:406]	no	no	no	no
chr1	ENSG00000159592	biallelic	biallelic			biallelic	biallelic	4	0	1	GPBP1L1	45627304	45688113	GC-rich promoter binding protein 1 like 1 [Source:HGNC Symbol;Acc:HGNC:28843]	no	no	no	no
chr1	ENSG00000159658	biallelic	biallelic				biallelic	3	0	1	EFCAB14	46674659	46719146	EF-hand calcium binding domain 14 [Source:HGNC Symbol;Acc:HGNC:29051]	no	no	no	no
chr1	ENSG00000160049	biallelic	biallelic					2	0	1	DFFA	10456522	10472529	DNA fragmentation factor subunit alpha [Source:HGNC Symbol;Acc:HGNC:2772]	no	no	no	no
chr1	ENSG00000160055	biallelic	biallelic					2	0	1	TMEM234	32214472	32222359	transmembrane protein 234 [Source:HGNC Symbol;Acc:HGNC:28837]	no	no	no	no
chr1	ENSG00000160072	biallelic	biallelic	biallelic	biallelic			4	0	1	ATAD3B	1471765	1497848	ATPase family AAA domain containing 3B [Source:HGNC Symbol;Acc:HGNC:24007]	no	no	no	no
chr1	ENSG00000160094	biallelic	biallelic					2	0	1	ZNF362	33256492	33300719	zinc finger protein 362 [Source:HGNC Symbol;Acc:HGNC:18079]	no	no	no	no
chr1	ENSG00000160691	biallelic	biallelic					2	0	1	SHC1	154962298	154974395	SHC adaptor protein 1 [Source:HGNC Symbol;Acc:HGNC:10840]	no	no	no	no
chr1	ENSG00000160710	biallelic	biallelic					2	0	1	ADAR	154581695	154628013	adenosine deaminase RNA specific [Source:HGNC Symbol;Acc:HGNC:225]	no	no	no	no
chr1	ENSG00000160712	biallelic						1	0	1	IL6R	154405193	154469450	interleukin 6 receptor [Source:HGNC Symbol;Acc:HGNC:6019]	no	no	no	no
chr1	ENSG00000160741	biallelic	biallelic			biallelic	biallelic	4	0	1	CRTC2	153947669	153958615	CREB regulated transcription coactivator 2 [Source:HGNC Symbol;Acc:HGNC:27301]	no	no	no	no
chr1	ENSG00000160752	biallelic	biallelic					2	0	1	FDPS	155308748	155320666	farnesyl diphosphate synthase [Source:HGNC Symbol;Acc:HGNC:3631]	no	no	no	no
chr1	ENSG00000160753	biallelic	biallelic					2	0	1	RUSC1	155320894	155331114	RUN and SH3 domain containing 1 [Source:HGNC Symbol;Acc:HGNC:17153]	no	no	no	no
chr1	ENSG00000160766	biallelic	biallelic	biallelic				3	0	1	GBAP1	155214368	155218874	glucosylceramidase beta pseudogene 1 [Source:HGNC Symbol;Acc:HGNC:4178]	no	no	no	no
chr1	ENSG00000160767	biallelic	biallelic					2	0	1	ENTREP3	155247205	155255483	endosomal transmembrane epsin interactor 3 [Source:HGNC Symbol;Acc:HGNC:1233]	no	no	no	no
chr1	ENSG00000160803	biallelic	biallelic			biallelic	biallelic	4	0	1	UBQLN4	156035299	156053798	ubiquilin 4 [Source:HGNC Symbol;Acc:HGNC:1237]	no	no	no	no
chr1	ENSG00000160818	biallelic	biallelic	biallelic	biallelic			4	0	1	GPATCH4	156594301	156601496	G-patch domain containing 4 (gene/pseudogene) [Source:HGNC Symbol;Acc:HGNC:25982]	no	no	no	no
chr1	ENSG00000162368	biallelic	biallelic	biallelic	biallelic		biallelic	5	0	1	CMPK1	47333790	47394866	cytidine/uridine monophosphate kinase 1 [Source:HGNC Symbol;Acc:HGNC:18170]	no	no	no	no
chr1	ENSG00000162373	biallelic	biallelic					2	0	1	BEND5	48727519	48776969	BEN domain containing 5 [Source:HGNC Symbol;Acc:HGNC:25668]	no	no	no	no
chr1	ENSG00000162390	biallelic	biallelic			biallelic	biallelic	4	0	1	ACOT11	54542257	54639192	acyl-CoA thioesterase 11 [Source:HGNC Symbol;Acc:HGNC:18156]	no	no	no	no
chr1	ENSG00000162402	biallelic	biallelic	biallelic	biallelic	biallelic	biallelic	6	0	1	USP24	55066359	55215378	ubiquitin specific peptidase 24 [Source:HGNC Symbol;Acc:HGNC:12623]	no	no	no	no
chr1	ENSG00000162413	biallelic	biallelic	biallelic		biallelic	biallelic	5	0	1	KLHL21	6590724	6614607	kelch like family member 21 [Source:HGNC Symbol;Acc:HGNC:29041]	no	no	no	no
chr1	ENSG00000162430	biallelic	biallelic	biallelic	biallelic	biallelic	biallelic	6	0	1	SELENON	25800193	25818221	selenoprotein N [Source:HGNC Symbol;Acc:HGNC:15999]	no	no	no	no
chr1	ENSG00000162433	biallelic	biallelic					2	0	1	AK4	65147549	65232145	adenylate kinase 4 [Source:HGNC Symbol;Acc:HGNC:363]	no	no	no	no
chr1	ENSG00000162434	biallelic	biallelic	biallelic	biallelic			4	0	1	JAK1	64833223	65067754	Janus kinase 1 [Source:HGNC Symbol;Acc:HGNC:6190]	no	no	no	no
chr1	ENSG00000162458	biallelic	biallelic			biallelic	biallelic	4	0	1	FBLIM1	15756607	15786594	filamin binding LIM protein 1 [Source:HGNC Symbol;Acc:HGNC:24686]	no	no	no	no
chr1	ENSG00000162490	biallelic	biallelic	biallelic	biallelic	biallelic	biallelic	6	0	1	DRAXIN	11691710	11725857	dorsal inhibitory axon guidance protein [Source:HGNC Symbol;Acc:HGNC:25054]	no	no	no	no
chr1	ENSG00000162496	biallelic		biallelic	biallelic	biallelic	biallelic	5	0	1	DHRS3	12567910	12618210	dehydrogenase/reductase 3 [Source:HGNC Symbol;Acc:HGNC:17693]	no	no	no	no
chr1	ENSG00000162512	biallelic	biallelic	biallelic	biallelic	biallelic	biallelic	6	0	1	SDC3	30869466	30908758	syndecan 3 [Source:HGNC Symbol;Acc:HGNC:10660]	no	no	no	no
chr1	ENSG00000162517	biallelic	biallelic					2	0	1	PEF1	31629866	31644896	penta-EF-hand domain containing 1 [Source:HGNC Symbol;Acc:HGNC:30009]	no	no	no	no
chr1	ENSG00000162521	biallelic	biallelic					2	0	1	RBBP4	32651142	32686211	RB binding protein 4, chromatin remodeling factor [Source:HGNC Symbol;Acc:HGNC:9887]	no	no	no	no
chr1	ENSG00000162522	biallelic	biallelic	biallelic	biallelic			4	0	1	KIAA1522	32741830	32774970	KIAA1522 [Source:HGNC Symbol;Acc:HGNC:29301]	no	no	no	no
chr1	ENSG00000162542	biallelic	biallelic	biallelic	biallelic			4	0	1	TMCO4	19682240	19799945	transmembrane and coiled-coil domains 4 [Source:HGNC Symbol;Acc:HGNC:27393]	no	no	no	no
chr1	ENSG00000162572	biallelic	biallelic			biallelic	biallelic	4	0	1	SCNN1D	1280436	1292029	sodium channel epithelial 1 subunit delta [Source:HGNC Symbol;Acc:HGNC:10601]	no	no	no	no
chr1	ENSG00000162576	biallelic	biallelic			biallelic	biallelic	4	0	1	MXRA8	1352689	1361777	matrix remodeling associated 8 [Source:HGNC Symbol;Acc:HGNC:7542]	no	no	no	no
chr1	ENSG00000162585	biallelic	biallelic	biallelic	biallelic			4	0	1	FAAP20	2184461	2212720	FA core complex associated protein 20 [Source:HGNC Symbol;Acc:HGNC:26428]	no	no	no	no
chr1	ENSG00000162591	biallelic	biallelic	biallelic	biallelic	biallelic	biallelic	6	0	1	MEGF6	3487951	3611508	multiple EGF like domains 6 [Source:HGNC Symbol;Acc:HGNC:3232]	no	no	no	no
chr1	ENSG00000162600	biallelic	biallelic			biallelic	biallelic	4	0	1	OMA1	58415384	58546802	OMA1 zinc metallopeptidase [Source:HGNC Symbol;Acc:HGNC:29661]	no	no	no	no
chr1	ENSG00000162601	biallelic	biallelic	biallelic	biallelic	biallelic	biallelic	6	0	1	MYSM1	58643440	58700090	Myb like, SWIRM and MPN domains 1 [Source:HGNC Symbol;Acc:HGNC:29401]	no	no	no	no
chr1	ENSG00000162614	biallelic	biallelic	biallelic				3	0	1	NEXN	77888513	77943895	nexilin F-actin binding protein [Source:HGNC Symbol;Acc:HGNC:29557]	no	no	no	no
chr1	ENSG00000162636	biallelic	biallelic			biallelic	biallelic	4	0	1	FAM102B	108560089	108644900	family with sequence similarity 102 member B [Source:HGNC Symbol;Acc:HGNC:27637]	no	no	no	no
chr1	ENSG00000162639	biallelic	biallelic					2	0	1	HENMT1	108648290	108661526	HEN methyltransferase 1 [Source:HGNC Symbol;Acc:HGNC:26400]	no	no	no	no
chr1	ENSG00000162664	biallelic	biallelic			biallelic	biallelic	4	0	1	ZNF326	89995110	90035533	zinc finger protein 326 [Source:HGNC Symbol;Acc:HGNC:14104]	no	no	no	no
chr1	ENSG00000162669	biallelic	biallelic			biallelic	biallelic	4	0	1	HFM1	91260766	91404856	helicase for meiosis 1 [Source:HGNC Symbol;Acc:HGNC:20193]	no	no	no	no
chr1	ENSG00000162687	biallelic	biallelic				biallelic	3	0	1	KCNT2	196225779	196609225	potassium sodium-activated channel subfamily T member 2 [Source:HGNC Symbol;Acc:HGNC:18866]	no	no	no	no
chr1	ENSG00000162688	biallelic	biallelic	biallelic	biallelic	biallelic	biallelic	6	0	1	AGL	99850361	99924023	amylo-alpha-1, 6-glucosidase, 4-alpha-glucanotransferase [Source:HGNC Symbol;Acc:HGNC:321]	no	no	no	no
chr1	ENSG00000162704	biallelic	biallelic	biallelic	biallelic	biallelic	biallelic	6	0	1	ARPC5	183620846	183635783	actin related protein 2/3 complex subunit 5 [Source:HGNC Symbol;Acc:HGNC:708]	no	no	no	no
chr1	ENSG00000162722	biallelic	biallelic			biallelic	biallelic	4	0	1	TRIM58	247857187	247880138	tripartite motif containing 58 [Source:HGNC Symbol;Acc:HGNC:24150]	no	no	no	no
chr1	ENSG00000162729	biallelic	biallelic					2	0	1	IGSF8	160091340	160098943	immunoglobulin superfamily member 8 [Source:HGNC Symbol;Acc:HGNC:17813]	no	no	no	no
chr1	ENSG00000162733	biallelic	biallelic					2	0	1	DDR2	162631373	162787405	discoidin domain receptor tyrosine kinase 2 [Source:HGNC Symbol;Acc:HGNC:2731]	no	no	no	no
chr1	ENSG00000162736	biallelic	biallelic			biallelic	biallelic	4	0	1	NCSTN	160343294	160358952	nicastrin [Source:HGNC Symbol;Acc:HGNC:17091]	no	no	no	no
chr1	ENSG00000162738	biallelic	biallelic	biallelic	biallelic			4	0	1	VANGL2	160400564	160428670	VANGL planar cell polarity protein 2 [Source:HGNC Symbol;Acc:HGNC:15511]	no	no	no	no
chr1	ENSG00000162745	biallelic	biallelic	biallelic	biallelic	biallelic	biallelic	6	0	1	OLFML2B	161983192	162023869	olfactomedin like 2B [Source:HGNC Symbol;Acc:HGNC:24558]	no	no	no	no
chr1	ENSG00000162755	biallelic				biallelic	biallelic	3	0	1	KLHDC9	161098361	161100346	kelch domain containing 9 [Source:HGNC Symbol;Acc:HGNC:28489]	no	no	no	no
chr1	ENSG00000162769	biallelic	biallelic	biallelic	biallelic			4	0	1	FLVCR1	212858275	212899363	FLVCR heme transporter 1 [Source:HGNC Symbol;Acc:HGNC:24682]	no	no	no	no
chr1	ENSG00000162775	biallelic	biallelic			biallelic	biallelic	4	0	1	RBM15	110338506	110346681	RNA binding motif protein 15 [Source:HGNC Symbol;Acc:HGNC:14959]	no	no	no	no
chr1	ENSG00000162782	biallelic						1	0	1	TDRD5	179591613	179691272	tudor domain containing 5 [Source:HGNC Symbol;Acc:HGNC:20614]	no	no	no	no
chr1	ENSG00000162783	biallelic	biallelic	biallelic	biallelic	biallelic	biallelic	6	0	1	IER5	181088700	181092900	immediate early response 5 [Source:HGNC Symbol;Acc:HGNC:5393]	no	no	no	no
chr1	ENSG00000162813	biallelic	biallelic					2	0	1	BPNT1	220057482	220090462	3'(2'), 5'-bisphosphate nucleotidase 1 [Source:HGNC Symbol;Acc:HGNC:1096]	no	no	no	no
chr1	ENSG00000162819	biallelic	biallelic		biallelic			3	0	1	BROX	222712553	222735196	BRO1 domain and CAAX motif containing [Source:HGNC Symbol;Acc:HGNC:26512]	no	no	no	no
chr1	ENSG00000162836	biallelic	biallelic	biallelic	biallelic	biallelic	biallelic	6	0	1	ACP6	147629652	147670524	acid phosphatase 6, lysophosphatidic [Source:HGNC Symbol;Acc:HGNC:29609]	no	no	no	no
chr1	ENSG00000162852	biallelic	biallelic	biallelic	biallelic	biallelic	biallelic	6	0	1	CNST	246566444	246668595	consortin, connexin sorting protein [Source:HGNC Symbol;Acc:HGNC:26486]	no	no	no	no
chr1	ENSG00000162889	biallelic	biallelic	biallelic	biallelic			4	0	1	MAPKAPK2	206684905	206734281	MAPK activated protein kinase 2 [Source:HGNC Symbol;Acc:HGNC:6887]	no	no	no	no
chr1	ENSG00000162909	biallelic	biallelic	biallelic	biallelic	biallelic	biallelic	6	0	1	CAPN2	223701593	223776018	calpain 2 [Source:HGNC Symbol;Acc:HGNC:1479]	no	no	no	no
chr1	ENSG00000163041	biallelic	biallelic					2	0	1	H3-3A	226061851	226072019	H3.3 histone A [Source:HGNC Symbol;Acc:HGNC:4764]	no	no	no	no
chr1	ENSG00000163050	biallelic	biallelic	biallelic	biallelic	biallelic	biallelic	6	0	1	COQ8A	226940286	226987544	coenzyme Q8A [Source:HGNC Symbol;Acc:HGNC:16812]	no	no	no	no
chr1	ENSG00000163141	biallelic				biallelic	biallelic	3	0	1	BNIPL	151036321	151047720	BCL2 interacting protein like [Source:HGNC Symbol;Acc:HGNC:16976]	no	no	no	no
chr1	ENSG00000163344	biallelic	biallelic					2	0	1	PMVK	154924740	154936719	phosphomevalonate kinase [Source:HGNC Symbol;Acc:HGNC:9141]	no	no	no	no
chr1	ENSG00000163349	biallelic	biallelic	biallelic	biallelic	biallelic	biallelic	6	0	1	HIPK1	113929324	113977869	homeodomain interacting protein kinase 1 [Source:HGNC Symbol;Acc:HGNC:19006]	no	no	no	no
chr1	ENSG00000163362	biallelic	biallelic			biallelic	biallelic	4	0	1	INAVA	200891048	200915742	innate immunity activator [Source:HGNC Symbol;Acc:HGNC:25599]	no	no	no	no
chr1	ENSG00000163374	biallelic	biallelic	biallelic	biallelic			4	0	1	YY1AP1	155659443	155689000	YY1 associated protein 1 [Source:HGNC Symbol;Acc:HGNC:30935]	no	no	no	no
chr1	ENSG00000163382	biallelic	biallelic					2	0	1	NAXE	156591756	156609507	NAD(P)HX epimerase [Source:HGNC Symbol;Acc:HGNC:18453]	no	no	no	no
chr1	ENSG00000163393	biallelic	biallelic			biallelic	biallelic	4	0	1	SLC22A15	115976513	116070054	solute carrier family 22 member 15 [Source:HGNC Symbol;Acc:HGNC:20301]	no	no	no	no
chr1	ENSG00000163399	biallelic	biallelic					2	0	1	ATP1A1	116372668	116410261	ATPase Na+/K+ transporting subunit alpha 1 [Source:HGNC Symbol;Acc:HGNC:799]	no	no	no	no
chr1	ENSG00000163431	biallelic						1	0	1	LMOD1	201896456	201946588	leiomodin 1 [Source:HGNC Symbol;Acc:HGNC:6647]	no	no	no	no
chr1	ENSG00000163531	biallelic				biallelic		2	0	1	NFASC	204828651	205022822	neurofascin [Source:HGNC Symbol;Acc:HGNC:29866]	no	no	no	no
chr1	ENSG00000163545	biallelic	biallelic			biallelic	biallelic	4	0	1	NUAK2	205302063	205321745	NUAK family kinase 2 [Source:HGNC Symbol;Acc:HGNC:29558]	no	no	no	no
chr1	ENSG00000163867	biallelic	biallelic					2	0	1	ZMYM6	34986165	35031945	zinc finger MYM-type containing 6 [Source:HGNC Symbol;Acc:HGNC:13050]	no	no	no	no
chr1	ENSG00000163879	biallelic	biallelic	biallelic	biallelic	biallelic	biallelic	6	0	1	DNALI1	37556919	37566857	dynein axonemal light intermediate chain 1 [Source:HGNC Symbol;Acc:HGNC:14353]	no	no	no	no
chr1	ENSG00000163909	biallelic						1	0	1	HEYL	39623435	39639643	hes related family bHLH transcription factor with YRPW motif like [Source:HGNC Symbol;Acc:HGNC:4882]	no	no	no	no
chr1	ENSG00000164002	biallelic	biallelic	biallelic	biallelic			4	0	1	EXO5	40508741	40516038	exonuclease 5 [Source:HGNC Symbol;Acc:HGNC:26115]	no	no	no	no
chr1	ENSG00000168389	biallelic	biallelic					2	0	1	MFSD2A	39955112	39969968	major facilitator superfamily domain containing 2A [Source:HGNC Symbol;Acc:HGNC:25897]	no	no	no	no
chr1	ENSG00000168528	biallelic	biallelic	biallelic	biallelic	biallelic	biallelic	6	0	1	SERINC2	31409565	31434680	serine incorporator 2 [Source:HGNC Symbol;Acc:HGNC:23231]	no	no	no	no
chr1	ENSG00000168765	biallelic	biallelic	biallelic	biallelic			4	0	1	GSTM4	109656099	109665496	glutathione S-transferase mu 4 [Source:HGNC Symbol;Acc:HGNC:4636]	no	no	no	no
chr1	ENSG00000169174	biallelic	biallelic	biallelic	biallelic	biallelic	biallelic	6	0	1	PCSK9	55039447	55064852	proprotein convertase subtilisin/kexin type 9 [Source:HGNC Symbol;Acc:HGNC:20001]	no	no	no	no
chr1	ENSG00000169418	biallelic	biallelic					2	0	1	NPR1	153678688	153693992	natriuretic peptide receptor 1 [Source:HGNC Symbol;Acc:HGNC:7943]	no	no	no	no
chr1	ENSG00000169598	biallelic	biallelic			biallelic	biallelic	4	0	1	DFFB	3857267	3885429	DNA fragmentation factor subunit beta [Source:HGNC Symbol;Acc:HGNC:2773]	no	no	no	no
chr1	ENSG00000169641	biallelic	biallelic			biallelic	biallelic	4	0	1	LUZP1	23084030	23177808	leucine zipper protein 1 [Source:HGNC Symbol;Acc:HGNC:14985]	no	no	no	no
chr1	ENSG00000169885	biallelic	biallelic		biallelic			3	0	1	CALML6	1915108	1917296	calmodulin like 6 [Source:HGNC Symbol;Acc:HGNC:24193]	no	no	no	no
chr1	ENSG00000169972	biallelic	biallelic					2	0	1	PUSL1	1308597	1311677	pseudouridine synthase like 1 [Source:HGNC Symbol;Acc:HGNC:26914]	no	no	no	no
chr1	ENSG00000171161	biallelic	biallelic					2	0	1	ZNF672	248838210	248849517	zinc finger protein 672 [Source:HGNC Symbol;Acc:HGNC:26179]	no	no	no	no
chr1	ENSG00000171163	biallelic	biallelic	biallelic	biallelic		biallelic	5	0	1	ZNF692	248850006	248859144	zinc finger protein 692 [Source:HGNC Symbol;Acc:HGNC:26049]	no	no	no	no
chr1	ENSG00000171502	biallelic			biallelic	biallelic	biallelic	4	0	1	COL24A1	85729233	86156943	collagen type XXIV alpha 1 chain [Source:HGNC Symbol;Acc:HGNC:20821]	no	no	no	no
chr1	ENSG00000171603	biallelic	biallelic					2	0	1	CLSTN1	9728926	9823984	calsyntenin 1 [Source:HGNC Symbol;Acc:HGNC:17447]	no	no	no	no
chr1	ENSG00000171680	biallelic	biallelic	biallelic	biallelic	biallelic	biallelic	6	0	1	PLEKHG5	6467122	6520074	pleckstrin homology and RhoGEF domain containing G5 [Source:HGNC Symbol;Acc:HGNC:29105]	no	no	no	no
chr1	ENSG00000171729	biallelic	biallelic			biallelic	biallelic	4	0	1	TMEM51	15152532	15220478	transmembrane protein 51 [Source:HGNC Symbol;Acc:HGNC:25488]	no	no	no	no
chr1	ENSG00000171824	biallelic	biallelic			biallelic	biallelic	4	0	1	EXOSC10	11066618	11099869	exosome component 10 [Source:HGNC Symbol;Acc:HGNC:9138]	no	no	no	no
chr1	ENSG00000173436	biallelic	biallelic				biallelic	3	0	1	MICOS10	19484403	19629821	mitochondrial contact site and cristae organizing system subunit 10 [Source:HGNC Symbol;Acc:HGNC:32068]	no	no	no	no
chr1	ENSG00000173846	biallelic	biallelic	biallelic	biallelic	biallelic	biallelic	6	0	1	PLK3	44800377	44805990	polo like kinase 3 [Source:HGNC Symbol;Acc:HGNC:2154]	no	no	no	no
chr1	ENSG00000174307	biallelic	biallelic	biallelic	biallelic	biallelic	biallelic	6	0	1	PHLDA3	201464278	201469237	pleckstrin homology like domain family A member 3 [Source:HGNC Symbol;Acc:HGNC:8934]	no	no	no	no
chr1	ENSG00000174371	biallelic	biallelic	biallelic	biallelic	biallelic	biallelic	6	0	1	EXO1	241847967	241895148	exonuclease 1 [Source:HGNC Symbol;Acc:HGNC:3511]	no	no	no	no
chr1	ENSG00000174567	biallelic				biallelic	biallelic	3	0	1	GOLT1A	204198163	204213988	golgi transport 1A [Source:HGNC Symbol;Acc:HGNC:24766]	no	no	no	no
chr1	ENSG00000174606	biallelic						1	0	1	ANGEL2	212992182	213015867	angel homolog 2 [Source:HGNC Symbol;Acc:HGNC:30534]	no	no	no	no
chr1	ENSG00000175137	biallelic	biallelic					2	0	1	SH3BP5L	248810446	248825915	SH3 binding domain protein 5 like [Source:HGNC Symbol;Acc:HGNC:29360]	no	no	no	no
chr1	ENSG00000175756	biallelic	biallelic					2	0	1	AURKAIP1	1373730	1375207	aurora kinase A interacting protein 1 [Source:HGNC Symbol;Acc:HGNC:24114]	no	no	no	no
chr1	ENSG00000176022	biallelic	biallelic					2	0	1	B3GALT6	1232237	1235041	beta-1,3-galactosyltransferase 6 [Source:HGNC Symbol;Acc:HGNC:17978]	no	no	no	no
chr1	ENSG00000176092	biallelic	biallelic	biallelic	biallelic	biallelic	biallelic	6	0	1	CRYBG2	26321698	26360080	crystallin beta-gamma domain containing 2 [Source:HGNC Symbol;Acc:HGNC:17295]	no	no	no	no
chr1	ENSG00000176261	biallelic	biallelic					2	0	1	ZBTB8OS	32600172	32650903	zinc finger and BTB domain containing 8 opposite strand [Source:HGNC Symbol;Acc:HGNC:24094]	no	no	no	no
chr1	ENSG00000176393	biallelic						1	0	1	RNPEP	201982372	202006147	arginyl aminopeptidase [Source:HGNC Symbol;Acc:HGNC:10078]	no	no	no	no
chr1	ENSG00000177181	biallelic	biallelic	biallelic	biallelic	biallelic	biallelic	6	0	1	RIMKLA	42380792	42424232	ribosomal modification protein rimK like family member A [Source:HGNC Symbol;Acc:HGNC:28725]	no	no	no	no
chr1	ENSG00000177606	biallelic	biallelic					2	0	1	JUN	58776845	58784048	Jun proto-oncogene, AP-1 transcription factor subunit [Source:HGNC Symbol;Acc:HGNC:6204]	no	no	no	no
chr1	ENSG00000178028	biallelic	biallelic	biallelic	biallelic	biallelic	biallelic	6	0	1	DMAP1	44213455	44220681	DNA methyltransferase 1 associated protein 1 [Source:HGNC Symbol;Acc:HGNC:18291]	no	no	no	no
chr1	ENSG00000178821	biallelic	biallelic	biallelic	biallelic			4	0	1	TMEM52	1917590	1919279	transmembrane protein 52 [Source:HGNC Symbol;Acc:HGNC:27916]	no	no	no	no
chr1	ENSG00000179023	biallelic	biallelic	biallelic	biallelic	biallelic	biallelic	6	0	1	KLHDC7A	18480930	18485974	kelch domain containing 7A [Source:HGNC Symbol;Acc:HGNC:26791]	no	no	no	no
chr1	ENSG00000179178	biallelic	biallelic	biallelic	biallelic	biallelic	biallelic	6	0	1	TMEM125	43269983	43274002	transmembrane protein 125 [Source:HGNC Symbol;Acc:HGNC:28275]	no	no	no	no
chr1	ENSG00000180098	biallelic	biallelic					2	0	1	TRNAU1AP	28553085	28578545	tRNA selenocysteine 1 associated protein 1 [Source:HGNC Symbol;Acc:HGNC:30813]	no	no	no	no
chr1	ENSG00000180198	biallelic	biallelic			biallelic	biallelic	4	0	1	RCC1	28505943	28539300	regulator of chromosome condensation 1 [Source:HGNC Symbol;Acc:HGNC:1913]	no	no	no	no
chr1	ENSG00000180287	biallelic	biallelic		biallelic			3	0	1	PLD5	242082986	242524697	phospholipase D family member 5 [Source:HGNC Symbol;Acc:HGNC:26879]	no	no	no	no
chr1	ENSG00000180867	biallelic	biallelic	biallelic	biallelic			4	0	1	PDIA3P1	147172744	147179622	protein disulfide isomerase family A member 3 pseudogene 1 [Source:HGNC Symbol;Acc:HGNC:4607]	no	no	no	no
chr1	ENSG00000181873	biallelic	biallelic			biallelic	biallelic	4	0	1	IBA57	228165804	228182257	iron-sulfur cluster assembly factor IBA57 [Source:HGNC Symbol;Acc:HGNC:27302]	no	no	no	no
chr1	ENSG00000182134	biallelic	biallelic					2	0	1	TDRKH	151770107	151791416	tudor and KH domain containing [Source:HGNC Symbol;Acc:HGNC:11713]	no	no	no	no
chr1	ENSG00000182827	biallelic	biallelic					2	0	1	ACBD3	226144679	226186741	acyl-CoA binding domain containing 3 [Source:HGNC Symbol;Acc:HGNC:15453]	no	no	no	no
chr1	ENSG00000183431	biallelic	biallelic	biallelic	biallelic			4	0	1	SF3A3	37956975	37990075	splicing factor 3a subunit 3 [Source:HGNC Symbol;Acc:HGNC:10767]	no	no	no	no
chr1	ENSG00000183856	biallelic	biallelic					2	0	1	IQGAP3	156525405	156572604	IQ motif containing GTPase activating protein 3 [Source:HGNC Symbol;Acc:HGNC:20669]	no	no	no	no
chr1	ENSG00000184163	biallelic	biallelic			biallelic	biallelic	4	0	1	C1QTNF12	1242446	1246722	C1q and TNF related 12 [Source:HGNC Symbol;Acc:HGNC:32308]	no	no	no	no
chr1	ENSG00000184371	biallelic	biallelic	biallelic				3	0	1	CSF1	109910242	109930992	colony stimulating factor 1 [Source:HGNC Symbol;Acc:HGNC:2432]	no	no	no	no
chr1	ENSG00000184677	biallelic	biallelic	biallelic	biallelic			4	0	1	ZBTB40	22428838	22531157	zinc finger and BTB domain containing 40 [Source:HGNC Symbol;Acc:HGNC:29045]	no	no	no	no
chr1	ENSG00000185278	biallelic	biallelic	biallelic	biallelic	biallelic	biallelic	6	0	1	ZBTB37	173868082	173903547	zinc finger and BTB domain containing 37 [Source:HGNC Symbol;Acc:HGNC:28365]	no	no	no	no
chr1	ENSG00000185420	biallelic	biallelic	biallelic	biallelic	biallelic		5	0	1	SMYD3	245749342	246507312	SET and MYND domain containing 3 [Source:HGNC Symbol;Acc:HGNC:15513]	no	no	no	no
chr1	ENSG00000185436	biallelic	biallelic					2	0	1	IFNLR1	24154168	24187959	interferon lambda receptor 1 [Source:HGNC Symbol;Acc:HGNC:18584]	no	no	no	no
chr1	ENSG00000185519	biallelic	biallelic					2	0	1	FAM131C	16057769	16073651	family with sequence similarity 131 member C [Source:HGNC Symbol;Acc:HGNC:26717]	no	no	no	no
chr1	ENSG00000185630	biallelic				biallelic	biallelic	3	0	1	PBX1	164555584	164899296	PBX homeobox 1 [Source:HGNC Symbol;Acc:HGNC:8632]	no	no	no	no
chr1	ENSG00000186197	biallelic	biallelic	biallelic	biallelic			4	0	1	EDARADD	236348257	236502915	EDAR associated death domain [Source:HGNC Symbol;Acc:HGNC:14341]	no	no	no	no
chr1	ENSG00000186301	biallelic	biallelic	biallelic	biallelic		biallelic	5	0	1	MST1P2	16645622	16650289	macrophage stimulating 1 pseudogene 2 [Source:HGNC Symbol;Acc:HGNC:7383]	no	no	no	no
chr1	ENSG00000186377	biallelic	biallelic					2	0	1	CYP4X1	47023669	47050751	cytochrome P450 family 4 subfamily X member 1 [Source:HGNC Symbol;Acc:HGNC:20244]	no	no	no	no
chr1	ENSG00000186501	biallelic	biallelic					2	0	1	TMEM222	27322145	27336400	transmembrane protein 222 [Source:HGNC Symbol;Acc:HGNC:25363]	no	no	no	no
chr1	ENSG00000186510	biallelic	biallelic	biallelic	biallelic	biallelic		5	0	1	CLCNKA	16018875	16034050	chloride voltage-gated channel Ka [Source:HGNC Symbol;Acc:HGNC:2026]	no	no	no	no
chr1	ENSG00000186603	biallelic	biallelic					2	0	1	HPDL	45326895	45328710	4-hydroxyphenylpyruvate dioxygenase like [Source:HGNC Symbol;Acc:HGNC:28242]	no	no	no	no
chr1	ENSG00000186715	biallelic		biallelic	biallelic			3	0	1	MST1L	16757232	16764480	macrophage stimulating 1 like (pseudogene) [Source:HGNC Symbol;Acc:HGNC:7390]	no	no	no	no
chr1	ENSG00000187147	biallelic	biallelic					2	0	1	RNF220	44405194	44651724	ring finger protein 220 [Source:HGNC Symbol;Acc:HGNC:25552]	no	no	no	no
chr1	ENSG00000187513	biallelic	biallelic	biallelic	biallelic	biallelic		5	0	1	GJA4	34792999	34795747	gap junction protein alpha 4 [Source:HGNC Symbol;Acc:HGNC:4278]	no	no	no	no
chr1	ENSG00000187608	biallelic	biallelic					2	0	1	ISG15	1001138	1014540	ISG15 ubiquitin like modifier [Source:HGNC Symbol;Acc:HGNC:4053]	no	no	no	no
chr1	ENSG00000187730	biallelic	biallelic		biallelic		biallelic	4	0	1	GABRD	2019329	2030758	gamma-aminobutyric acid type A receptor subunit delta [Source:HGNC Symbol;Acc:HGNC:4084]	no	no	no	no
chr1	ENSG00000187961	biallelic	biallelic					2	0	1	KLHL17	960584	965719	kelch like family member 17 [Source:HGNC Symbol;Acc:HGNC:24023]	no	no	no	no
chr1	ENSG00000188157	biallelic	biallelic	biallelic	biallelic	biallelic	biallelic	6	0	1	AGRN	1020120	1056118	agrin [Source:HGNC Symbol;Acc:HGNC:329]	no	no	no	no
chr1	ENSG00000188529	biallelic	biallelic	biallelic	biallelic			4	0	1	SRSF10	23964347	23980927	serine and arginine rich splicing factor 10 [Source:HGNC Symbol;Acc:HGNC:16713]	no	no	no	no
chr1	ENSG00000188739	biallelic	biallelic					2	0	1	RBM34	235131183	235161283	RNA binding motif protein 34 [Source:HGNC Symbol;Acc:HGNC:28965]	no	no	no	no
chr1	ENSG00000188859	biallelic	biallelic			biallelic	biallelic	4	0	1	FAM78B	166057426	166167001	family with sequence similarity 78 member B [Source:HGNC Symbol;Acc:HGNC:13495]	no	no	no	no
chr1	ENSG00000188931	biallelic	biallelic					2	0	1	CFAP126	161364733	161367876	cilia and flagella associated protein 126 [Source:HGNC Symbol;Acc:HGNC:32325]	no	no	no	no
chr1	ENSG00000188976	biallelic	biallelic					2	0	1	NOC2L	944203	959309	NOC2 like nucleolar associated transcriptional repressor [Source:HGNC Symbol;Acc:HGNC:24517]	no	no	no	no
chr1	ENSG00000189195	biallelic				biallelic	biallelic	3	0	1	BTBD8	92080305	92184725	BTB domain containing 8 [Source:HGNC Symbol;Acc:HGNC:21019]	no	no	no	no
chr1	ENSG00000189266	biallelic						1	0	1	PNRC2	23956839	23963462	proline rich nuclear receptor coactivator 2 [Source:HGNC Symbol;Acc:HGNC:23158]	no	no	no	no
chr1	ENSG00000189334	biallelic	biallelic	biallelic	biallelic	biallelic	biallelic	6	0	1	S100A14	153614255	153616986	S100 calcium binding protein A14 [Source:HGNC Symbol;Acc:HGNC:18901]	no	no	no	no
chr1	ENSG00000196187	biallelic	biallelic			biallelic	biallelic	4	0	1	TMEM63A	225845536	225882380	transmembrane protein 63A [Source:HGNC Symbol;Acc:HGNC:29118]	no	no	no	no
chr1	ENSG00000196418	biallelic	biallelic	biallelic	biallelic	biallelic	biallelic	6	0	1	ZNF124	247121975	247172020	zinc finger protein 124 [Source:HGNC Symbol;Acc:HGNC:12907]	no	no	no	no
chr1	ENSG00000196517	biallelic	biallelic	biallelic	biallelic			4	0	1	SLC6A9	43991500	44031467	solute carrier family 6 member 9 [Source:HGNC Symbol;Acc:HGNC:11056]	no	no	no	no
chr1	ENSG00000196878	biallelic					biallelic	2	0	1	LAMB3	209614870	209652425	laminin subunit beta 3 [Source:HGNC Symbol;Acc:HGNC:6490]	no	no	no	no
chr1	ENSG00000197312	biallelic	biallelic	biallelic	biallelic	biallelic	biallelic	6	0	1	DDI2	15617458	15669044	DNA damage inducible 1 homolog 2 [Source:HGNC Symbol;Acc:HGNC:24578]	no	no	no	no
chr1	ENSG00000197323	biallelic	biallelic	biallelic	biallelic			4	0	1	TRIM33	114392790	114511203	tripartite motif containing 33 [Source:HGNC Symbol;Acc:HGNC:16290]	no	no	no	no
chr1	ENSG00000197530	biallelic	biallelic	biallelic	biallelic	biallelic	biallelic	6	0	1	MIB2	1615454	1630605	MIB E3 ubiquitin protein ligase 2 [Source:HGNC Symbol;Acc:HGNC:30577]	no	no	no	no
chr1	ENSG00000197622	biallelic	biallelic					2	0	1	CDC42SE1	151050971	151070325	CDC42 small effector 1 [Source:HGNC Symbol;Acc:HGNC:17719]	no	no	no	no
chr1	ENSG00000197721	biallelic	biallelic	biallelic	biallelic	biallelic	biallelic	6	0	1	CR1L	207645113	207738416	complement C3b/C4b receptor 1 like [Source:HGNC Symbol;Acc:HGNC:2335]	no	no	no	no
chr1	ENSG00000197785	biallelic	biallelic			biallelic	biallelic	4	0	1	ATAD3A	1512162	1534685	ATPase family AAA domain containing 3A [Source:HGNC Symbol;Acc:HGNC:25567]	no	no	no	no
chr1	ENSG00000197982	biallelic	biallelic					2	0	1	C1orf122	37806979	37809454	chromosome 1 open reading frame 122 [Source:HGNC Symbol;Acc:HGNC:24789]	no	no	no	no
chr1	ENSG00000198162	biallelic	biallelic	biallelic	biallelic	biallelic	biallelic	6	0	1	MAN1A2	117367449	117528872	mannosidase alpha class 1A member 2 [Source:HGNC Symbol;Acc:HGNC:6822]	no	no	no	no
chr1	ENSG00000198468	biallelic	biallelic					2	0	1	FLVCR1-DT	212852105	212858139	FLVCR1 divergent transcript [Source:HGNC Symbol;Acc:HGNC:39077]	no	no	no	no
chr1	ENSG00000198483	biallelic		biallelic	biallelic			3	0	1	ANKRD35	145866560	145885866	ankyrin repeat domain 35 [Source:HGNC Symbol;Acc:HGNC:26323]	no	no	no	no
chr1	ENSG00000198492	biallelic	biallelic			biallelic	biallelic	4	0	1	YTHDF2	28736621	28769775	YTH N6-methyladenosine RNA binding protein 2 [Source:HGNC Symbol;Acc:HGNC:31675]	no	no	no	no
chr1	ENSG00000198625	biallelic	biallelic			biallelic	biallelic	4	0	1	MDM4	204516379	204558120	MDM4 regulator of p53 [Source:HGNC Symbol;Acc:HGNC:6974]	no	no	no	no
chr1	ENSG00000198626	biallelic	biallelic	biallelic		biallelic		4	0	1	RYR2	237042184	237833988	ryanodine receptor 2 [Source:HGNC Symbol;Acc:HGNC:10484]	no	no	no	no
chr1	ENSG00000198711	biallelic						1	0	1	SSBP3-AS1	54236440	54239063	SSBP3 antisense RNA 1 [Source:HGNC Symbol;Acc:HGNC:32328]	no	no	no	no
chr1	ENSG00000198793	biallelic	biallelic	biallelic	biallelic	biallelic	biallelic	6	0	1	MTOR	11106535	11262556	mechanistic target of rapamycin kinase [Source:HGNC Symbol;Acc:HGNC:3942]	no	no	no	no
chr1	ENSG00000198799	biallelic	biallelic					2	0	1	LRIG2	113073198	113132260	leucine rich repeats and immunoglobulin like domains 2 [Source:HGNC Symbol;Acc:HGNC:20889]	no	no	no	no
chr1	ENSG00000198860	biallelic	biallelic					2	0	1	TSEN15	184051651	184123978	tRNA splicing endonuclease subunit 15 [Source:HGNC Symbol;Acc:HGNC:16791]	no	no	no	no
chr1	ENSG00000198912	biallelic	biallelic	biallelic	biallelic			4	0	1	C1orf174	3889125	3900293	chromosome 1 open reading frame 174 [Source:HGNC Symbol;Acc:HGNC:27915]	no	no	no	no
chr1	ENSG00000203965	biallelic	biallelic	biallelic	biallelic	biallelic	biallelic	6	0	1	EFCAB7	63523372	63572693	EF-hand calcium binding domain 7 [Source:HGNC Symbol;Acc:HGNC:29379]	no	no	no	no
chr1	ENSG00000204138	biallelic	biallelic					2	0	1	PHACTR4	28369582	28500364	phosphatase and actin regulator 4 [Source:HGNC Symbol;Acc:HGNC:25793]	no	no	no	no
chr1	ENSG00000204624	biallelic	biallelic			biallelic	biallelic	4	0	1	DISP3	11479155	11537551	dispatched RND transporter family member 3 [Source:HGNC Symbol;Acc:HGNC:29251]	no	no	no	no
chr1	ENSG00000205116	biallelic	biallelic			biallelic	biallelic	4	0	1	TMEM88B	1425871	1430255	transmembrane protein 88B [Source:HGNC Symbol;Acc:HGNC:37099]	no	no	no	no
chr1	ENSG00000211454	biallelic						1	0	1	AKR7L	19265982	19274194	aldo-keto reductase family 7 like (gene/pseudogene) [Source:HGNC Symbol;Acc:HGNC:24056]	no	no	no	no
chr1	ENSG00000213047	biallelic						1	0	1	DENND1B	197504748	197775696	DENN domain containing 1B [Source:HGNC Symbol;Acc:HGNC:28404]	no	no	no	no
chr1	ENSG00000213366	biallelic	biallelic			biallelic	biallelic	4	0	1	GSTM2	109668022	109709551	glutathione S-transferase mu 2 [Source:HGNC Symbol;Acc:HGNC:4634]	no	no	no	no
chr1	ENSG00000213625	biallelic		biallelic	biallelic			3	0	1	LEPROT	65420587	65436007	leptin receptor overlapping transcript [Source:HGNC Symbol;Acc:HGNC:29477]	no	no	no	no
chr1	ENSG00000214193	biallelic	biallelic	biallelic	biallelic	biallelic	biallelic	6	0	1	SH3D21	36306368	36329340	SH3 domain containing 21 [Source:HGNC Symbol;Acc:HGNC:26236]	no	no	no	no
chr1	ENSG00000215717	biallelic						1	0	1	TMEM167B	109090764	109096934	transmembrane protein 167B [Source:HGNC Symbol;Acc:HGNC:30187]	no	no	no	no
chr1	ENSG00000215788	biallelic	biallelic	biallelic	biallelic	biallelic	biallelic	6	0	1	TNFRSF25	6460786	6466175	TNF receptor superfamily member 25 [Source:HGNC Symbol;Acc:HGNC:11910]	no	no	no	no
chr1	ENSG00000215883	biallelic	biallelic			biallelic	biallelic	4	0	1	CYB5RL	54169651	54200036	cytochrome b5 reductase like [Source:HGNC Symbol;Acc:HGNC:32220]	no	no	no	no
chr1	ENSG00000215908	biallelic	biallelic	biallelic	biallelic		biallelic	5	0	1	CROCCP2	16618969	16657232	CROCC pseudogene 2 [Source:HGNC Symbol;Acc:HGNC:28170]	no	no	no	no
chr1	ENSG00000215910	biallelic	biallelic	biallelic		biallelic	biallelic	5	0	1	C1orf167	11761787	11789585	chromosome 1 open reading frame 167 [Source:HGNC Symbol;Acc:HGNC:25262]	no	no	no	no
chr1	ENSG00000220323	biallelic	biallelic					2	0	1	H2BC19P	149843041	149843533	H2B clustered histone 19, pseudogene [Source:HGNC Symbol;Acc:HGNC:20517]	no	no	no	no
chr1	ENSG00000221978	biallelic	biallelic					2	0	1	CCNL2	1385711	1399335	cyclin L2 [Source:HGNC Symbol;Acc:HGNC:20570]	no	no	no	no
chr1	ENSG00000224051	biallelic	biallelic					2	0	1	CPTP	1324756	1328896	ceramide-1-phosphate transfer protein [Source:HGNC Symbol;Acc:HGNC:28116]	no	no	no	no
chr1	ENSG00000224870	biallelic	biallelic					2	0	1	MRPL20-AS1	1399515	1402046	MRPL20 antisense RNA 1 [Source:HGNC Symbol;Acc:HGNC:27125]	no	no	no	no
chr1	ENSG00000227775	biallelic	biallelic					2	0	1		1724512	1737251	ribosomal protein S7 (RPS7) pseudogene	no	no	no	no
chr1	ENSG00000230124	biallelic					biallelic	2	0	1	ACBD6	180269653	180502954	acyl-CoA binding domain containing 6 [Source:HGNC Symbol;Acc:HGNC:23339]	no	no	no	no
chr1	ENSG00000230937	biallelic	biallelic					2	0	1	MIR205HG	209428817	209432848	MIR205 host gene [Source:HGNC Symbol;Acc:HGNC:43562]	no	no	no	no
chr1	ENSG00000232093	biallelic	biallelic					2	0	1	DCST1-AS1	155045191	155046118	DCST1 antisense RNA 1 [Source:HGNC Symbol;Acc:HGNC:41147]	no	no	no	no
chr1	ENSG00000232671	biallelic	biallelic					2	0	1	ZNF687-AS1	151279678	151282000	ZNF687 antisense RNA 1 [Source:HGNC Symbol;Acc:HGNC:54048]	no	no	no	no
chr1	ENSG00000233589	biallelic	biallelic	biallelic	biallelic			4	0	1		68479129	68483539	novel transcript	no	no	no	no
chr1	ENSG00000234741	biallelic	biallelic	biallelic	biallelic	biallelic	biallelic	6	0	1	GAS5	173858559	173868882	growth arrest specific 5 [Source:HGNC Symbol;Acc:HGNC:16355]	no	no	no	no
chr1	ENSG00000235098	biallelic	biallelic					2	0	1	ANKRD65	1418420	1421769	ankyrin repeat domain 65 [Source:HGNC Symbol;Acc:HGNC:42950]	no	no	no	no
chr1	ENSG00000235501	biallelic						1	0	1	CNN3-DT	94927361	94963616	CNN3 divergent transcript [Source:HGNC Symbol;Acc:HGNC:54176]	no	no	no	no
chr1	ENSG00000242125	biallelic	biallelic					2	0	1	SNHG3	28505980	28510892	small nucleolar RNA host gene 3 [Source:HGNC Symbol;Acc:HGNC:10118]	no	no	no	no
chr1	ENSG00000244038	biallelic	biallelic					2	0	1	DDOST	20651767	20661544	dolichyl-diphosphooligosaccharide--protein glycosyltransferase non-catalytic subunit [Source:HGNC Symbol;Acc:HGNC:2728]	no	no	no	no
chr1	ENSG00000248333	biallelic	biallelic					2	0	1	CDK11B	1635225	1659012	cyclin dependent kinase 11B [Source:HGNC Symbol;Acc:HGNC:1729]	no	no	no	no
chr1	ENSG00000253831	biallelic						1	0	1	ETV3L	157092043	157112412	ETS variant transcription factor 3 like [Source:HGNC Symbol;Acc:HGNC:33834]	no	no	no	no
chr1	ENSG00000254685	biallelic	biallelic					2	0	1	FPGT	74198238	74234086	fucose-1-phosphate guanylyltransferase [Source:HGNC Symbol;Acc:HGNC:3825]	no	no	no	no
chr1	ENSG00000263528	biallelic	biallelic	biallelic	biallelic	biallelic	biallelic	6	0	1	IKBKE	206470476	206496889	inhibitor of nuclear factor kappa B kinase subunit epsilon [Source:HGNC Symbol;Acc:HGNC:14552]	no	no	no	no
chr1	ENSG00000266028	biallelic	biallelic	biallelic	biallelic			4	0	1	SRGAP2	206203346	206464436	SLIT-ROBO Rho GTPase activating protein 2 [Source:HGNC Symbol;Acc:HGNC:19751]	no	no	no	no
chr1	ENSG00000266338	biallelic	biallelic	biallelic	biallelic			4	0	1	NBPF15	144421390	144461676	NBPF member 15 [Source:HGNC Symbol;Acc:HGNC:28791]	no	no	no	no
chr1	ENSG00000266472	biallelic	biallelic					2	0	1	MRPS21	150293861	150308979	mitochondrial ribosomal protein S21 [Source:HGNC Symbol;Acc:HGNC:14046]	no	no	no	no
chr1	ENSG00000269113	biallelic	biallelic	biallelic	biallelic	biallelic	biallelic	6	0	1	TRABD2B	47760528	47997385	TraB domain containing 2B [Source:HGNC Symbol;Acc:HGNC:44200]	no	no	no	no
chr1	ENSG00000269713	biallelic	biallelic	biallelic	biallelic			4	0	1	NBPF9	149052186	149103561	NBPF member 9 [Source:HGNC Symbol;Acc:HGNC:31991]	no	no	no	no
chr1	ENSG00000270231	biallelic	biallelic	biallelic	biallelic	biallelic	biallelic	6	0	1	NBPF8	120415035	120469676	NBPF member 8 [Source:HGNC Symbol;Acc:HGNC:31990]	no	no	no	no
chr1	ENSG00000270629	biallelic	biallelic					2	0	1	NBPF14	148531385	148679742	NBPF member 14 [Source:HGNC Symbol;Acc:HGNC:25232]	no	no	no	no
chr1	ENSG00000271601	biallelic		biallelic	biallelic			3	0	1	LIX1L	145933423	145958017	limb and CNS expressed 1 like [Source:HGNC Symbol;Acc:HGNC:28715]	no	no	no	no
chr1	ENSG00000272153	biallelic	biallelic					2	0	1		3785008	3785538	novel transcript, antisense to LRRC47	no	no	no	no
chr1	ENSG00000272645	biallelic	biallelic			biallelic	biallelic	4	0	1	GTF2IP20	223982754	223988154	general transcription factor IIi pseudogene 20 [Source:HGNC Symbol;Acc:HGNC:51732]	no	no	no	no
chr1	ENSG00000273136	biallelic		biallelic	biallelic			3	0	1	NBPF26	120723949	120842110	NBPF member 26 [Source:HGNC Symbol;Acc:HGNC:49571]	no	no	no	no
chr1	ENSG00000275131	biallelic	biallelic	biallelic				3	0	1	PDE4DIPP2	120489860	120701289	PDE4DIP pseudogene 2 [Source:HGNC Symbol;Acc:HGNC:55081]	no	no	no	no
chr1	ENSG00000286600	biallelic						1	0	1		201359018	201385784	novel transcript	no	no	no	no
chr2	ENSG00000003393	biallelic	biallelic			biallelic	biallelic	4	0	2	ALS2	201700267	201782112	alsin Rho guanine nucleotide exchange factor ALS2 [Source:HGNC Symbol;Acc:HGNC:443]	no	no	no	no
chr2	ENSG00000003402	biallelic	biallelic					2	0	2	CFLAR	201116154	201176687	CASP8 and FADD like apoptosis regulator [Source:HGNC Symbol;Acc:HGNC:1876]	no	no	no	no
chr2	ENSG00000005436	biallelic	biallelic	biallelic	biallelic	biallelic	biallelic	6	0	2	GCFC2	75652000	75710985	GC-rich sequence DNA-binding factor 2 [Source:HGNC Symbol;Acc:HGNC:1317]	no	no	no	no
chr2	ENSG00000006607	biallelic	biallelic			biallelic	biallelic	4	0	2	FARP2	241356285	241494841	FERM, ARH/RhoGEF and pleckstrin domain protein 2 [Source:HGNC Symbol;Acc:HGNC:16460]	no	no	no	no
chr2	ENSG00000008869	biallelic	biallelic	biallelic	biallelic			4	0	2	HEATR5B	36968383	37084372	HEAT repeat containing 5B [Source:HGNC Symbol;Acc:HGNC:29273]	no	no	no	no
chr2	ENSG00000011566	biallelic	biallelic	biallelic	biallelic			4	0	2	MAP4K3	39249266	39437301	mitogen-activated protein kinase kinase kinase kinase 3 [Source:HGNC Symbol;Acc:HGNC:6865]	no	no	no	no
chr2	ENSG00000018510	biallelic	biallelic					2	0	2	AGPS	177392746	177567024	alkylglycerone phosphate synthase [Source:HGNC Symbol;Acc:HGNC:327]	no	no	no	no
chr2	ENSG00000018699	biallelic	biallelic	biallelic	biallelic	biallelic	biallelic	6	0	2	TTC27	32628032	32821051	tetratricopeptide repeat domain 27 [Source:HGNC Symbol;Acc:HGNC:25986]	no	no	no	no
chr2	ENSG00000021826	biallelic	biallelic	biallelic	biallelic	biallelic	biallelic	6	0	2	CPS1	210477682	210679107	carbamoyl-phosphate synthase 1 [Source:HGNC Symbol;Acc:HGNC:2323]	no	no	no	no
chr2	ENSG00000023228	biallelic	biallelic	biallelic	biallelic	biallelic	biallelic	6	0	2	NDUFS1	206114817	206159509	NADH:ubiquinone oxidoreductase core subunit S1 [Source:HGNC Symbol;Acc:HGNC:7707]	no	no	no	no
chr2	ENSG00000028116	biallelic	biallelic	biallelic	biallelic			4	0	2	VRK2	57907629	58159920	VRK serine/threonine kinase 2 [Source:HGNC Symbol;Acc:HGNC:12719]	no	no	no	no
chr2	ENSG00000035141	biallelic	biallelic	biallelic	biallelic	biallelic	biallelic	6	0	2	FAM136A	70295976	70302067	family with sequence similarity 136 member A [Source:HGNC Symbol;Acc:HGNC:25911]	no	no	no	no
chr2	ENSG00000040933	biallelic						1	0	2	INPP4A	98444854	98594392	inositol polyphosphate-4-phosphatase type I A [Source:HGNC Symbol;Acc:HGNC:6074]	no	no	no	no
chr2	ENSG00000042445	biallelic	biallelic			biallelic	biallelic	4	0	2	RETSAT	85341955	85354531	retinol saturase [Source:HGNC Symbol;Acc:HGNC:25991]	no	no	no	no
chr2	ENSG00000042493	biallelic	biallelic	biallelic	biallelic	biallelic	biallelic	6	0	2	CAPG	85394753	85418432	capping actin protein, gelsolin like [Source:HGNC Symbol;Acc:HGNC:1474]	no	no	no	no
chr2	ENSG00000048991	biallelic	biallelic			biallelic	biallelic	4	0	2	R3HDM1	135531455	135725270	R3H domain containing 1 [Source:HGNC Symbol;Acc:HGNC:9757]	no	no	no	no
chr2	ENSG00000049323	biallelic	biallelic	biallelic	biallelic	biallelic	biallelic	6	0	2	LTBP1	32946953	33399509	latent transforming growth factor beta binding protein 1 [Source:HGNC Symbol;Acc:HGNC:6714]	no	no	no	no
chr2	ENSG00000054356	biallelic	biallelic			biallelic	biallelic	4	0	2	PTPRN	219289623	219309648	protein tyrosine phosphatase receptor type N [Source:HGNC Symbol;Acc:HGNC:9676]	no	no	no	no
chr2	ENSG00000061676	biallelic	biallelic	biallelic	biallelic	biallelic	biallelic	6	0	2	NCKAP1	182909115	183038858	NCK associated protein 1 [Source:HGNC Symbol;Acc:HGNC:7666]	no	no	no	no
chr2	ENSG00000063660	biallelic	biallelic	biallelic	biallelic	biallelic	biallelic	6	0	2	GPC1	240435663	240468076	glypican 1 [Source:HGNC Symbol;Acc:HGNC:4449]	no	no	no	no
chr2	ENSG00000065548	biallelic	biallelic	biallelic	biallelic			4	0	2	ZC3H15	186486253	186509361	zinc finger CCCH-type containing 15 [Source:HGNC Symbol;Acc:HGNC:29528]	no	no	no	no
chr2	ENSG00000065802	biallelic	biallelic					2	0	2	ASB1	238426742	238452250	ankyrin repeat and SOCS box containing 1 [Source:HGNC Symbol;Acc:HGNC:16011]	no	no	no	no
chr2	ENSG00000066032	biallelic	biallelic	biallelic	biallelic			4	0	2	CTNNA2	79185231	80648861	catenin alpha 2 [Source:HGNC Symbol;Acc:HGNC:2510]	no	no	no	no
chr2	ENSG00000068024	biallelic	biallelic	biallelic	biallelic	biallelic	biallelic	6	0	2	HDAC4	239048168	239401654	histone deacetylase 4 [Source:HGNC Symbol;Acc:HGNC:14063]	no	no	no	no
chr2	ENSG00000068654	biallelic	biallelic	biallelic	biallelic			4	0	2	POLR1A	86020216	86106155	RNA polymerase I subunit A [Source:HGNC Symbol;Acc:HGNC:17264]	no	no	no	no
chr2	ENSG00000068724	biallelic	biallelic	biallelic	biallelic	biallelic	biallelic	6	0	2	TTC7A	46915869	47076137	tetratricopeptide repeat domain 7A [Source:HGNC Symbol;Acc:HGNC:19750]	no	no	no	no
chr2	ENSG00000068784	biallelic	biallelic	biallelic	biallelic	biallelic	biallelic	6	0	2	SRBD1	45388680	45612165	S1 RNA binding domain 1 [Source:HGNC Symbol;Acc:HGNC:25521]	no	no	no	no
chr2	ENSG00000068912	biallelic	biallelic			biallelic	biallelic	4	0	2	ERLEC1	53787009	53833038	endoplasmic reticulum lectin 1 [Source:HGNC Symbol;Acc:HGNC:25222]	no	no	no	no
chr2	ENSG00000071054	biallelic	biallelic	biallelic	biallelic	biallelic	biallelic	6	0	2	MAP4K4	101696850	101894690	mitogen-activated protein kinase kinase kinase kinase 4 [Source:HGNC Symbol;Acc:HGNC:6866]	no	no	no	no
chr2	ENSG00000071073	biallelic	biallelic					2	0	2	MGAT4A	98619106	98731132	alpha-1,3-mannosyl-glycoprotein 4-beta-N-acetylglucosaminyltransferase A [Source:HGNC Symbol;Acc:HGNC:7047]	no	no	no	no
chr2	ENSG00000071082	biallelic	biallelic	biallelic	biallelic			4	0	2	RPL31	101002229	101024032	ribosomal protein L31 [Source:HGNC Symbol;Acc:HGNC:10334]	no	no	no	no
chr2	ENSG00000072135	biallelic	biallelic					2	0	2	PTPN18	130356045	130375405	protein tyrosine phosphatase non-receptor type 18 [Source:HGNC Symbol;Acc:HGNC:9649]	no	no	no	no
chr2	ENSG00000072163	biallelic		biallelic	biallelic			3	0	2	LIMS2	127638381	127681786	LIM zinc finger domain containing 2 [Source:HGNC Symbol;Acc:HGNC:16084]	no	no	no	no
chr2	ENSG00000072195	biallelic	biallelic	biallelic	biallelic			4	0	2	SPEG	219434843	219493629	striated muscle enriched protein kinase [Source:HGNC Symbol;Acc:HGNC:16901]	no	no	no	no
chr2	ENSG00000074047	biallelic	biallelic					2	0	2	GLI2	120735623	120992653	GLI family zinc finger 2 [Source:HGNC Symbol;Acc:HGNC:4318]	no	no	no	no
chr2	ENSG00000074054	biallelic	biallelic		biallelic			3	0	2	CLASP1	121337776	121649476	cytoplasmic linker associated protein 1 [Source:HGNC Symbol;Acc:HGNC:17088]	no	no	no	no
chr2	ENSG00000074582	biallelic	biallelic	biallelic				3	0	2	BCS1L	218658764	218663443	BCS1 homolog, ubiquinol-cytochrome c reductase complex chaperone [Source:HGNC Symbol;Acc:HGNC:1020]	no	no	no	no
chr2	ENSG00000075292	biallelic	biallelic	biallelic	biallelic			4	0	2	ZNF638	71276561	71435069	zinc finger protein 638 [Source:HGNC Symbol;Acc:HGNC:17894]	no	no	no	no
chr2	ENSG00000075340	biallelic	biallelic	biallelic	biallelic			4	0	2	ADD2	70607618	70768225	adducin 2 [Source:HGNC Symbol;Acc:HGNC:244]	no	no	no	no
chr2	ENSG00000076003	biallelic	biallelic			biallelic	biallelic	4	0	2	MCM6	135839626	135876443	minichromosome maintenance complex component 6 [Source:HGNC Symbol;Acc:HGNC:6949]	no	no	no	no
chr2	ENSG00000077044	biallelic	biallelic	biallelic	biallelic			4	0	2	DGKD	233354494	233472104	diacylglycerol kinase delta [Source:HGNC Symbol;Acc:HGNC:2851]	no	no	no	no
chr2	ENSG00000077232	biallelic	biallelic			biallelic	biallelic	4	0	2	DNAJC10	182716255	182794464	DnaJ heat shock protein family (Hsp40) member C10 [Source:HGNC Symbol;Acc:HGNC:24637]	no	no	no	no
chr2	ENSG00000078018	biallelic	biallelic	biallelic	biallelic	biallelic	biallelic	6	0	2	MAP2	209424047	209734147	microtubule associated protein 2 [Source:HGNC Symbol;Acc:HGNC:6839]	no	no	no	no
chr2	ENSG00000079246	biallelic	biallelic	biallelic	biallelic	biallelic	biallelic	6	0	2	XRCC5	216107464	216206303	X-ray repair cross complementing 5 [Source:HGNC Symbol;Acc:HGNC:12833]	no	no	no	no
chr2	ENSG00000079308	biallelic	biallelic	biallelic	biallelic	biallelic	biallelic	6	0	2	TNS1	217799588	218033982	tensin 1 [Source:HGNC Symbol;Acc:HGNC:11973]	no	no	no	no
chr2	ENSG00000080345	biallelic	biallelic			biallelic	biallelic	4	0	2	RIF1	151409883	151508013	replication timing regulatory factor 1 [Source:HGNC Symbol;Acc:HGNC:23207]	no	no	no	no
chr2	ENSG00000081320	biallelic	biallelic	biallelic	biallelic			4	0	2	STK17B	196133583	196176503	serine/threonine kinase 17b [Source:HGNC Symbol;Acc:HGNC:11396]	no	no	no	no
chr2	ENSG00000082146	biallelic	biallelic			biallelic	biallelic	4	0	2	STRADB	201387858	201480846	STE20 related adaptor beta [Source:HGNC Symbol;Acc:HGNC:13205]	no	no	no	no
chr2	ENSG00000082438	biallelic	biallelic	biallelic	biallelic	biallelic	biallelic	6	0	2	COBLL1	164653624	164843679	cordon-bleu WH2 repeat protein like 1 [Source:HGNC Symbol;Acc:HGNC:23571]	no	no	no	no
chr2	ENSG00000084693	biallelic	biallelic	biallelic	biallelic	biallelic	biallelic	6	0	2	AGBL5	27042364	27070622	AGBL carboxypeptidase 5 [Source:HGNC Symbol;Acc:HGNC:26147]	no	no	no	no
chr2	ENSG00000084710	biallelic	biallelic			biallelic	biallelic	4	0	2	EFR3B	25042076	25159135	EFR3 homolog B [Source:HGNC Symbol;Acc:HGNC:29155]	no	no	no	no
chr2	ENSG00000084764	biallelic	biallelic	biallelic	biallelic	biallelic	biallelic	6	0	2	MAPRE3	26970637	27027219	microtubule associated protein RP/EB family member 3 [Source:HGNC Symbol;Acc:HGNC:6892]	no	no	no	no
chr2	ENSG00000084774	biallelic	biallelic	biallelic	biallelic	biallelic	biallelic	6	0	2	CAD	27217369	27243943	carbamoyl-phosphate synthetase 2, aspartate transcarbamylase, and dihydroorotase [Source:HGNC Symbol;Acc:HGNC:1424]	no	no	no	no
chr2	ENSG00000085978	biallelic	biallelic			biallelic	biallelic	4	0	2	ATG16L1	233210051	233295674	autophagy related 16 like 1 [Source:HGNC Symbol;Acc:HGNC:21498]	no	no	no	no
chr2	ENSG00000085982	biallelic	biallelic	biallelic	biallelic	biallelic	biallelic	6	0	2	USP40	233475526	233566782	ubiquitin specific peptidase 40 [Source:HGNC Symbol;Acc:HGNC:20069]	no	no	no	no
chr2	ENSG00000088179	biallelic	biallelic					2	0	2	PTPN4	119759922	119984899	protein tyrosine phosphatase non-receptor type 4 [Source:HGNC Symbol;Acc:HGNC:9656]	no	no	no	no
chr2	ENSG00000091409	biallelic	biallelic					2	0	2	ITGA6	172427354	172506459	integrin subunit alpha 6 [Source:HGNC Symbol;Acc:HGNC:6142]	no	no	no	no
chr2	ENSG00000114923	biallelic	biallelic	biallelic		biallelic	biallelic	5	0	2	SLC4A3	219627394	219641980	solute carrier family 4 member 3 [Source:HGNC Symbol;Acc:HGNC:11029]	no	no	no	no
chr2	ENSG00000114933	biallelic	biallelic	biallelic	biallelic			4	0	2	INO80D	205993721	206086303	INO80 complex subunit D [Source:HGNC Symbol;Acc:HGNC:25997]	no	no	no	no
chr2	ENSG00000114942	biallelic	biallelic	biallelic	biallelic	biallelic	biallelic	6	0	2	EEF1B2	206159585	206162928	eukaryotic translation elongation factor 1 beta 2 [Source:HGNC Symbol;Acc:HGNC:3208]	no	no	no	no
chr2	ENSG00000114999	biallelic	biallelic			biallelic	biallelic	4	0	2	TTL	112482156	112541739	tubulin tyrosine ligase [Source:HGNC Symbol;Acc:HGNC:21586]	no	no	no	no
chr2	ENSG00000115053	biallelic	biallelic			biallelic	biallelic	4	0	2	NCL	231453531	231483641	nucleolin [Source:HGNC Symbol;Acc:HGNC:7667]	no	no	no	no
chr2	ENSG00000115073	biallelic	biallelic	biallelic	biallelic			4	0	2	ACTR1B	97655939	97664044	actin related protein 1B [Source:HGNC Symbol;Acc:HGNC:168]	no	no	no	no
chr2	ENSG00000115091	biallelic	biallelic	biallelic				3	0	2	ACTR3	113890063	113962596	actin related protein 3 [Source:HGNC Symbol;Acc:HGNC:170]	no	no	no	no
chr2	ENSG00000115109	biallelic	biallelic	biallelic	biallelic			4	0	2	EPB41L5	120013077	120179119	erythrocyte membrane protein band 4.1 like 5 [Source:HGNC Symbol;Acc:HGNC:19819]	no	no	no	no
chr2	ENSG00000115129	biallelic	biallelic					2	0	2	TP53I3	24077433	24085861	tumor protein p53 inducible protein 3 [Source:HGNC Symbol;Acc:HGNC:19373]	no	no	no	no
chr2	ENSG00000115155	biallelic					biallelic	2	0	2	OTOF	26457203	26558756	otoferlin [Source:HGNC Symbol;Acc:HGNC:8515]	no	no	no	no
chr2	ENSG00000115159	biallelic	biallelic					2	0	2	GPD2	156435290	156613735	glycerol-3-phosphate dehydrogenase 2 [Source:HGNC Symbol;Acc:HGNC:4456]	no	no	no	no
chr2	ENSG00000115183	biallelic	biallelic			biallelic	biallelic	4	0	2	TANC1	158968640	159232659	tetratricopeptide repeat, ankyrin repeat and coiled-coil containing 1 [Source:HGNC Symbol;Acc:HGNC:29364]	no	no	no	no
chr2	ENSG00000115194	biallelic	biallelic			biallelic	biallelic	4	0	2	SLC30A3	27253684	27275817	solute carrier family 30 member 3 [Source:HGNC Symbol;Acc:HGNC:11014]	no	no	no	no
chr2	ENSG00000115239	biallelic	biallelic			biallelic	biallelic	4	0	2	ASB3	53532672	53860160	ankyrin repeat and SOCS box containing 3 [Source:HGNC Symbol;Acc:HGNC:16013]	no	no	no	no
chr2	ENSG00000115271	biallelic	biallelic	biallelic	biallelic			4	0	2	GCA	162318840	162371595	grancalcin [Source:HGNC Symbol;Acc:HGNC:15990]	no	no	no	no
chr2	ENSG00000115275	biallelic	biallelic			biallelic	biallelic	4	0	2	MOGS	74461057	74465410	mannosyl-oligosaccharide glucosidase [Source:HGNC Symbol;Acc:HGNC:24862]	no	no	no	no
chr2	ENSG00000115282	biallelic				biallelic		2	0	2	TTC31	74483073	74494559	tetratricopeptide repeat domain 31 [Source:HGNC Symbol;Acc:HGNC:25759]	no	no	no	no
chr2	ENSG00000115290	biallelic	biallelic					2	0	2	GRB14	164492417	164621482	growth factor receptor bound protein 14 [Source:HGNC Symbol;Acc:HGNC:4565]	no	no	no	no
chr2	ENSG00000115306	biallelic	biallelic	biallelic	biallelic	biallelic	biallelic	6	0	2	SPTBN1	54456317	54671446	spectrin beta, non-erythrocytic 1 [Source:HGNC Symbol;Acc:HGNC:11275]	no	no	no	no
chr2	ENSG00000115307	biallelic	biallelic			biallelic	biallelic	4	0	2	AUP1	74526645	74529760	AUP1 lipid droplet regulating VLDL assembly factor [Source:HGNC Symbol;Acc:HGNC:891]	no	no	no	no
chr2	ENSG00000115350	biallelic	biallelic	biallelic	biallelic	biallelic	biallelic	6	0	2	POLE4	74958643	74970128	DNA polymerase epsilon 4, accessory subunit [Source:HGNC Symbol;Acc:HGNC:18755]	no	no	no	no
chr2	ENSG00000115368	biallelic	biallelic	biallelic	biallelic			4	0	2	WDR75	189441446	189475552	WD repeat domain 75 [Source:HGNC Symbol;Acc:HGNC:25725]	no	no	no	no
chr2	ENSG00000115414	biallelic	biallelic	biallelic	biallelic	biallelic	biallelic	6	0	2	FN1	215360440	215436073	fibronectin 1 [Source:HGNC Symbol;Acc:HGNC:3778]	no	no	no	no
chr2	ENSG00000115446	biallelic	biallelic	biallelic	biallelic			4	0	2	UNC50	98608579	98618515	unc-50 inner nuclear membrane RNA binding protein [Source:HGNC Symbol;Acc:HGNC:16046]	no	no	no	no
chr2	ENSG00000115461	biallelic		biallelic	biallelic			3	0	2	IGFBP5	216672105	216695549	insulin like growth factor binding protein 5 [Source:HGNC Symbol;Acc:HGNC:5474]	no	no	no	no
chr2	ENSG00000115464	biallelic	biallelic	biallelic	biallelic	biallelic	biallelic	6	0	2	USP34	61187463	61471087	ubiquitin specific peptidase 34 [Source:HGNC Symbol;Acc:HGNC:20066]	no	no	no	no
chr2	ENSG00000115468	biallelic	biallelic					2	0	2	EFHD1	232606057	232682776	EF-hand domain family member D1 [Source:HGNC Symbol;Acc:HGNC:29556]	no	no	no	no
chr2	ENSG00000115514	biallelic	biallelic					2	0	2	TXNDC9	99318982	99340702	thioredoxin domain containing 9 [Source:HGNC Symbol;Acc:HGNC:24110]	no	no	no	no
chr2	ENSG00000115520	biallelic	biallelic					2	0	2	COQ10B	197453493	197475310	coenzyme Q10B [Source:HGNC Symbol;Acc:HGNC:25819]	no	no	no	no
chr2	ENSG00000115524	biallelic	biallelic					2	0	2	SF3B1	197388515	197435079	splicing factor 3b subunit 1 [Source:HGNC Symbol;Acc:HGNC:10768]	no	no	no	no
chr2	ENSG00000115539	biallelic	biallelic	biallelic	biallelic	biallelic	biallelic	6	0	2	PDCL3	100562993	100576739	phosducin like 3 [Source:HGNC Symbol;Acc:HGNC:28860]	no	no	no	no
chr2	ENSG00000115541	biallelic	biallelic					2	0	2	HSPE1	197500140	197503449	heat shock protein family E (Hsp10) member 1 [Source:HGNC Symbol;Acc:HGNC:5269]	no	no	no	no
chr2	ENSG00000115548	biallelic	biallelic			biallelic	biallelic	4	0	2	KDM3A	86440647	86492716	lysine demethylase 3A [Source:HGNC Symbol;Acc:HGNC:20815]	no	no	no	no
chr2	ENSG00000115556	biallelic	biallelic	biallelic		biallelic	biallelic	5	0	2	PLCD4	218607855	218637184	phospholipase C delta 4 [Source:HGNC Symbol;Acc:HGNC:9062]	no	no	no	no
chr2	ENSG00000115568	biallelic	biallelic	biallelic	biallelic	biallelic	biallelic	6	0	2	ZNF142	218633329	218659655	zinc finger protein 142 [Source:HGNC Symbol;Acc:HGNC:12927]	no	no	no	no
chr2	ENSG00000115641	biallelic	biallelic	biallelic	biallelic	biallelic	biallelic	6	0	2	FHL2	105357712	105438513	four and a half LIM domains 2 [Source:HGNC Symbol;Acc:HGNC:3703]	no	no	no	no
chr2	ENSG00000115648	biallelic	biallelic			biallelic	biallelic	4	0	2	MLPH	237485428	237555322	melanophilin [Source:HGNC Symbol;Acc:HGNC:29643]	no	no	no	no
chr2	ENSG00000115649	biallelic	biallelic	biallelic	biallelic	biallelic	biallelic	6	0	2	CNPPD1	219171897	219178106	cyclin Pas1/PHO80 domain containing 1 [Source:HGNC Symbol;Acc:HGNC:25220]	no	no	no	no
chr2	ENSG00000115661	biallelic	biallelic			biallelic	biallelic	4	0	2	STK16	219245455	219250337	serine/threonine kinase 16 [Source:HGNC Symbol;Acc:HGNC:11394]	no	no	no	no
chr2	ENSG00000115677	biallelic	biallelic			biallelic	biallelic	4	0	2	HDLBP	241227264	241317061	high density lipoprotein binding protein [Source:HGNC Symbol;Acc:HGNC:4857]	no	no	no	no
chr2	ENSG00000115685	biallelic						1	0	2	PPP1R7	241149576	241183652	protein phosphatase 1 regulatory subunit 7 [Source:HGNC Symbol;Acc:HGNC:9295]	no	no	no	no
chr2	ENSG00000115687	biallelic	biallelic	biallelic	biallelic	biallelic	biallelic	6	0	2	PASK	241106099	241150264	PAS domain containing serine/threonine kinase [Source:HGNC Symbol;Acc:HGNC:17270]	no	no	no	no
chr2	ENSG00000115750	biallelic	biallelic	biallelic	biallelic	biallelic	biallelic	6	0	2	TAF1B	9843443	9934416	TATA-box binding protein associated factor, RNA polymerase I subunit B [Source:HGNC Symbol;Acc:HGNC:11533]	no	no	no	no
chr2	ENSG00000115760	biallelic	biallelic	biallelic	biallelic	biallelic	biallelic	6	0	2	BIRC6	32357023	32619571	baculoviral IAP repeat containing 6 [Source:HGNC Symbol;Acc:HGNC:13516]	no	no	no	no
chr2	ENSG00000115761	biallelic	biallelic	biallelic	biallelic			4	0	2	NOL10	10562347	10689987	nucleolar protein 10 [Source:HGNC Symbol;Acc:HGNC:25862]	no	no	no	no
chr2	ENSG00000115816	biallelic	biallelic	biallelic	biallelic	biallelic	biallelic	6	0	2	CEBPZ	37201612	37231596	CCAAT enhancer binding protein zeta [Source:HGNC Symbol;Acc:HGNC:24218]	no	no	no	no
chr2	ENSG00000115825	biallelic	biallelic	biallelic	biallelic	biallelic	biallelic	6	0	2	PRKD3	37250502	37324833	protein kinase D3 [Source:HGNC Symbol;Acc:HGNC:9408]	no	no	no	no
chr2	ENSG00000115839	biallelic	biallelic			biallelic	biallelic	4	0	2	RAB3GAP1	135052289	135176667	RAB3 GTPase activating protein catalytic subunit 1 [Source:HGNC Symbol;Acc:HGNC:17063]	no	no	no	no
chr2	ENSG00000115875	biallelic	biallelic					2	0	2	SRSF7	38743599	38751494	serine and arginine rich splicing factor 7 [Source:HGNC Symbol;Acc:HGNC:10789]	no	no	no	no
chr2	ENSG00000115946	biallelic	biallelic	biallelic	biallelic			4	0	2	PNO1	68157888	68176238	partner of NOB1 homolog [Source:HGNC Symbol;Acc:HGNC:32790]	no	no	no	no
chr2	ENSG00000115947	biallelic	biallelic	biallelic	biallelic			4	0	2	ORC4	147930396	148021604	origin recognition complex subunit 4 [Source:HGNC Symbol;Acc:HGNC:8490]	no	no	no	no
chr2	ENSG00000115970	biallelic	biallelic	biallelic	biallelic			4	0	2	THADA	43230851	43596038	THADA armadillo repeat containing [Source:HGNC Symbol;Acc:HGNC:19217]	no	no	no	no
chr2	ENSG00000115977	biallelic	biallelic	biallelic	biallelic			4	0	2	AAK1	69457997	69674349	AP2 associated kinase 1 [Source:HGNC Symbol;Acc:HGNC:19679]	no	no	no	no
chr2	ENSG00000115993	biallelic	biallelic			biallelic	biallelic	4	0	2	TRAK2	201377207	201451500	trafficking kinesin protein 2 [Source:HGNC Symbol;Acc:HGNC:13206]	no	no	no	no
chr2	ENSG00000116001	biallelic	biallelic					2	0	2	TIA1	70209444	70248660	TIA1 cytotoxic granule associated RNA binding protein [Source:HGNC Symbol;Acc:HGNC:11802]	no	no	no	no
chr2	ENSG00000116005	biallelic	biallelic	biallelic	biallelic			4	0	2	PCYOX1	70257386	70281185	prenylcysteine oxidase 1 [Source:HGNC Symbol;Acc:HGNC:20588]	no	no	no	no
chr2	ENSG00000116016	biallelic	biallelic					2	0	2	EPAS1	46293667	46386697	endothelial PAS domain protein 1 [Source:HGNC Symbol;Acc:HGNC:3374]	no	no	no	no
chr2	ENSG00000116062	biallelic	biallelic	biallelic	biallelic	biallelic	biallelic	6	0	2	MSH6	47695530	47810063	mutS homolog 6 [Source:HGNC Symbol;Acc:HGNC:7329]	no	no	no	no
chr2	ENSG00000116095	biallelic	biallelic					2	0	2	PLEKHA3	178480457	178516463	pleckstrin homology domain containing A3 [Source:HGNC Symbol;Acc:HGNC:14338]	no	no	no	no
chr2	ENSG00000116106	biallelic						1	0	2	EPHA4	221418027	221574202	EPH receptor A4 [Source:HGNC Symbol;Acc:HGNC:3388]	no	no	no	no
chr2	ENSG00000116127	biallelic	biallelic	biallelic	biallelic			4	0	2	ALMS1	73385758	73625166	ALMS1 centrosome and basal body associated protein [Source:HGNC Symbol;Acc:HGNC:428]	no	no	no	no
chr2	ENSG00000118004	biallelic	biallelic					2	0	2	COLEC11	3594832	3644644	collectin subfamily member 11 [Source:HGNC Symbol;Acc:HGNC:17213]	no	no	no	no
chr2	ENSG00000118257	biallelic	biallelic	biallelic	biallelic	biallelic	biallelic	6	0	2	NRP2	205681990	205798133	neuropilin 2 [Source:HGNC Symbol;Acc:HGNC:8005]	no	no	no	no
chr2	ENSG00000118960	biallelic	biallelic	biallelic	biallelic	biallelic	biallelic	6	0	2	HS1BP3	20560448	20651130	HCLS1 binding protein 3 [Source:HGNC Symbol;Acc:HGNC:24979]	no	no	no	no
chr2	ENSG00000118961	biallelic	biallelic	biallelic	biallelic			4	0	2	LDAH	20684014	20823130	lipid droplet associated hydrolase [Source:HGNC Symbol;Acc:HGNC:26145]	no	no	no	no
chr2	ENSG00000118965	biallelic						1	0	2	WDR35	19910263	19990105	WD repeat domain 35 [Source:HGNC Symbol;Acc:HGNC:29250]	no	no	no	no
chr2	ENSG00000119004	biallelic	biallelic					2	0	2	CYP20A1	203238977	203306026	cytochrome P450 family 20 subfamily A member 1 [Source:HGNC Symbol;Acc:HGNC:20576]	no	no	no	no
chr2	ENSG00000119185	biallelic	biallelic	biallelic	biallelic			4	0	2	ITGB1BP1	9403475	9423528	integrin subunit beta 1 binding protein 1 [Source:HGNC Symbol;Acc:HGNC:23927]	no	no	no	no
chr2	ENSG00000119203	biallelic	biallelic	biallelic	biallelic			4	0	2	CPSF3	9423651	9473101	cleavage and polyadenylation specific factor 3 [Source:HGNC Symbol;Acc:HGNC:2326]	no	no	no	no
chr2	ENSG00000119760	biallelic	biallelic			biallelic	biallelic	4	0	2	SUPT7L	27650809	27663840	SPT7 like, STAGA complex subunit gamma [Source:HGNC Symbol;Acc:HGNC:30632]	no	no	no	no
chr2	ENSG00000119771	biallelic	biallelic	biallelic	biallelic	biallelic	biallelic	6	0	2	KLHL29	23385179	23708611	kelch like family member 29 [Source:HGNC Symbol;Acc:HGNC:29404]	no	no	no	no
chr2	ENSG00000119772	biallelic	biallelic	biallelic	biallelic	biallelic	biallelic	6	0	2	DNMT3A	25227855	25342590	DNA methyltransferase 3 alpha [Source:HGNC Symbol;Acc:HGNC:2978]	no	no	no	no
chr2	ENSG00000119787	biallelic	biallelic			biallelic	biallelic	4	0	2	ATL2	38293954	38377285	atlastin GTPase 2 [Source:HGNC Symbol;Acc:HGNC:24047]	no	no	no	no
chr2	ENSG00000119844	biallelic	biallelic					2	0	2	AFTPH	64524299	64593005	aftiphilin [Source:HGNC Symbol;Acc:HGNC:25951]	no	no	no	no
chr2	ENSG00000119888	biallelic	biallelic	biallelic	biallelic	biallelic	biallelic	6	0	2	EPCAM	47345158	47387601	epithelial cell adhesion molecule [Source:HGNC Symbol;Acc:HGNC:11529]	no	no	no	no
chr2	ENSG00000121964	biallelic	biallelic	biallelic	biallelic	biallelic	biallelic	6	0	2	GTDC1	143938068	144332568	glycosyltransferase like domain containing 1 [Source:HGNC Symbol;Acc:HGNC:20887]	no	no	no	no
chr2	ENSG00000121988	biallelic	biallelic					2	0	2	ZRANB3	135136916	135531218	zinc finger RANBP2-type containing 3 [Source:HGNC Symbol;Acc:HGNC:25249]	no	no	no	no
chr2	ENSG00000122085	biallelic	biallelic	biallelic	biallelic			4	0	2	MTERF4	241072169	241102332	mitochondrial transcription termination factor 4 [Source:HGNC Symbol;Acc:HGNC:28785]	no	no	no	no
chr2	ENSG00000123485	biallelic	biallelic	biallelic	biallelic	biallelic	biallelic	6	0	2	HJURP	233833416	233854566	Holliday junction recognition protein [Source:HGNC Symbol;Acc:HGNC:25444]	no	no	no	no
chr2	ENSG00000123600	biallelic	biallelic			biallelic	biallelic	4	0	2	METTL8	171315746	171434802	methyltransferase 8, methylcytidine [Source:HGNC Symbol;Acc:HGNC:25856]	no	no	no	no
chr2	ENSG00000123607	biallelic	biallelic	biallelic	biallelic			4	0	2	TTC21B	165857475	165953851	tetratricopeptide repeat domain 21B [Source:HGNC Symbol;Acc:HGNC:25660]	no	no	no	no
chr2	ENSG00000123609	biallelic	biallelic			biallelic	biallelic	4	0	2	NMI	151270470	151289894	N-myc and STAT interactor [Source:HGNC Symbol;Acc:HGNC:7854]	no	no	no	no
chr2	ENSG00000123989	biallelic	biallelic	biallelic	biallelic			4	0	2	CHPF	219538954	219543809	chondroitin polymerizing factor [Source:HGNC Symbol;Acc:HGNC:24291]	no	no	no	no
chr2	ENSG00000123992	biallelic	biallelic					2	0	2	DNPEP	219372043	219400022	aspartyl aminopeptidase [Source:HGNC Symbol;Acc:HGNC:2981]	no	no	no	no
chr2	ENSG00000123999	biallelic	biallelic	biallelic	biallelic			4	0	2	INHA	219569162	219575711	inhibin subunit alpha [Source:HGNC Symbol;Acc:HGNC:6065]	no	no	no	no
chr2	ENSG00000124006	biallelic	biallelic	biallelic	biallelic	biallelic	biallelic	6	0	2	OBSL1	219550728	219571859	obscurin like cytoskeletal adaptor 1 [Source:HGNC Symbol;Acc:HGNC:29092]	no	no	no	no
chr2	ENSG00000124374	biallelic	biallelic			biallelic	biallelic	4	0	2	PAIP2B	71182738	71227103	poly(A) binding protein interacting protein 2B [Source:HGNC Symbol;Acc:HGNC:29200]	no	no	no	no
chr2	ENSG00000125630	biallelic	biallelic			biallelic	biallelic	4	0	2	POLR1B	112541915	112579818	RNA polymerase I subunit B [Source:HGNC Symbol;Acc:HGNC:20454]	no	no	no	no
chr2	ENSG00000127831	biallelic						1	0	2	VIL1	218419121	218453295	villin 1 [Source:HGNC Symbol;Acc:HGNC:12690]	no	no	no	no
chr2	ENSG00000127838	biallelic	biallelic					2	0	2	PNKD	218269651	218346793	PNKD metallo-beta-lactamase domain containing [Source:HGNC Symbol;Acc:HGNC:9153]	no	no	no	no
chr2	ENSG00000128641	biallelic	biallelic	biallelic	biallelic	biallelic	biallelic	6	0	2	MYO1B	191245185	191425389	myosin IB [Source:HGNC Symbol;Acc:HGNC:7596]	no	no	no	no
chr2	ENSG00000128654	biallelic	biallelic					2	0	2	MTX2	176269395	176338025	metaxin 2 [Source:HGNC Symbol;Acc:HGNC:7506]	no	no	no	no
chr2	ENSG00000130147	biallelic	biallelic	biallelic	biallelic	biallelic	biallelic	6	0	2	SH3BP4	234952017	235055714	SH3 domain binding protein 4 [Source:HGNC Symbol;Acc:HGNC:10826]	no	no	no	no
chr2	ENSG00000130414	biallelic	biallelic					2	0	2	NDUFA10	239892450	240025743	NADH:ubiquinone oxidoreductase subunit A10 [Source:HGNC Symbol;Acc:HGNC:7684]	no	no	no	no
chr2	ENSG00000130508	biallelic	biallelic	biallelic	biallelic	biallelic	biallelic	6	0	2	PXDN	1631887	1744852	peroxidasin [Source:HGNC Symbol;Acc:HGNC:14966]	no	no	no	no
chr2	ENSG00000132031	biallelic	biallelic	biallelic	biallelic			4	0	2	MATN3	19992052	20012668	matrilin 3 [Source:HGNC Symbol;Acc:HGNC:6909]	no	no	no	no
chr2	ENSG00000132300	biallelic	biallelic	biallelic	biallelic			4	0	2	PTCD3	86106223	86142157	pentatricopeptide repeat domain 3 [Source:HGNC Symbol;Acc:HGNC:24717]	no	no	no	no
chr2	ENSG00000132305	biallelic	biallelic	biallelic	biallelic			4	0	2	IMMT	86143932	86195472	inner membrane mitochondrial protein [Source:HGNC Symbol;Acc:HGNC:6047]	no	no	no	no
chr2	ENSG00000134313	biallelic	biallelic	biallelic	biallelic			4	0	2	KIDINS220	8721081	8837630	kinase D interacting substrate 220 [Source:HGNC Symbol;Acc:HGNC:29508]	no	no	no	no
chr2	ENSG00000134317	biallelic	biallelic	biallelic	biallelic	biallelic	biallelic	6	0	2	GRHL1	9951693	10002277	grainyhead like transcription factor 1 [Source:HGNC Symbol;Acc:HGNC:17923]	no	no	no	no
chr2	ENSG00000134324	biallelic	biallelic					2	0	2	LPIN1	11677595	11827409	lipin 1 [Source:HGNC Symbol;Acc:HGNC:13345]	no	no	no	no
chr2	ENSG00000135617	biallelic	biallelic					2	0	2	PRADC1	73228010	73233239	protease associated domain containing 1 [Source:HGNC Symbol;Acc:HGNC:16047]	no	no	no	no
chr2	ENSG00000135622	biallelic	biallelic			biallelic	biallelic	4	0	2	SEMA4F	74654228	74683853	ssemaphorin 4F [Source:HGNC Symbol;Acc:HGNC:10734]	no	no	no	no
chr2	ENSG00000135624	biallelic	biallelic					2	0	2	CCT7	73233420	73253021	chaperonin containing TCP1 subunit 7 [Source:HGNC Symbol;Acc:HGNC:1622]	no	no	no	no
chr2	ENSG00000135636	biallelic	biallelic	biallelic	biallelic	biallelic	biallelic	6	0	2	DYSF	71453561	71686763	dysferlin [Source:HGNC Symbol;Acc:HGNC:3097]	no	no	no	no
chr2	ENSG00000135899	biallelic	biallelic	biallelic	biallelic	biallelic	biallelic	6	0	2	SP110	230165186	230225729	SP110 nuclear body protein [Source:HGNC Symbol;Acc:HGNC:5401]	no	no	no	no
chr2	ENSG00000135916	biallelic	biallelic	biallelic	biallelic	biallelic	biallelic	6	0	2	ITM2C	230864639	230879248	integral membrane protein 2C [Source:HGNC Symbol;Acc:HGNC:6175]	no	no	no	no
chr2	ENSG00000135917	biallelic	biallelic					2	0	2	SLC19A3	227683763	227718028	solute carrier family 19 member 3 [Source:HGNC Symbol;Acc:HGNC:16266]	no	no	no	no
chr2	ENSG00000135919	biallelic	biallelic	biallelic	biallelic	biallelic	biallelic	6	0	2	SERPINE2	223975045	224039318	serpin family E member 2 [Source:HGNC Symbol;Acc:HGNC:8951]	no	no	no	no
chr2	ENSG00000135924	biallelic	biallelic					2	0	2	DNAJB2	219279342	219286898	DnaJ heat shock protein family (Hsp40) member B2 [Source:HGNC Symbol;Acc:HGNC:5228]	no	no	no	no
chr2	ENSG00000135926	biallelic	biallelic					2	0	2	TMBIM1	218274197	218292586	transmembrane BAX inhibitor motif containing 1 [Source:HGNC Symbol;Acc:HGNC:23410]	no	no	no	no
chr2	ENSG00000135930	biallelic						1	0	2	EIF4E2	232550659	232583644	eukaryotic translation initiation factor 4E family member 2 [Source:HGNC Symbol;Acc:HGNC:3293]	no	no	no	no
chr2	ENSG00000135931	biallelic	biallelic	biallelic	biallelic	biallelic	biallelic	6	0	2	ARMC9	231198546	231376848	armadillo repeat containing 9 [Source:HGNC Symbol;Acc:HGNC:20730]	no	no	no	no
chr2	ENSG00000135945	biallelic	biallelic			biallelic	biallelic	4	0	2	REV1	99400475	99490035	REV1 DNA directed polymerase [Source:HGNC Symbol;Acc:HGNC:14060]	no	no	no	no
chr2	ENSG00000135966	biallelic	biallelic	biallelic	biallelic	biallelic	biallelic	6	0	2	TGFBRAP1	105264391	105329735	transforming growth factor beta receptor associated protein 1 [Source:HGNC Symbol;Acc:HGNC:16836]	no	no	no	no
chr2	ENSG00000135972	biallelic	biallelic	biallelic	biallelic			4	0	2	MRPS9	105038069	105099960	mitochondrial ribosomal protein S9 [Source:HGNC Symbol;Acc:HGNC:14501]	no	no	no	no
chr2	ENSG00000135976	biallelic	biallelic	biallelic	biallelic	biallelic	biallelic	6	0	2	ANKRD36	97113153	97264521	ankyrin repeat domain 36 [Source:HGNC Symbol;Acc:HGNC:24079]	no	no	no	no
chr2	ENSG00000135999	biallelic	biallelic	biallelic	biallelic	biallelic		5	0	2	EPC2	148644440	148787569	enhancer of polycomb homolog 2 [Source:HGNC Symbol;Acc:HGNC:24543]	no	no	no	no
chr2	ENSG00000136002	biallelic	biallelic	biallelic	biallelic	biallelic	biallelic	6	0	2	ARHGEF4	130836914	131047263	Rho guanine nucleotide exchange factor 4 [Source:HGNC Symbol;Acc:HGNC:684]	no	no	no	no
chr2	ENSG00000136536	biallelic	biallelic			biallelic	biallelic	4	0	2	MARCHF7	159712457	159771027	membrane associated ring-CH-type finger 7 [Source:HGNC Symbol;Acc:HGNC:17393]	no	no	no	no
chr2	ENSG00000136560	biallelic	biallelic					2	0	2	TANK	161136908	161236230	TRAF family member associated NFKB activator [Source:HGNC Symbol;Acc:HGNC:11562]	no	no	no	no
chr2	ENSG00000136682	biallelic	biallelic					2	0	2	ZNG1B	113437691	113496204	Zn regulated GTPase metalloprotein activator 1B [Source:HGNC Symbol;Acc:HGNC:17907]	no	no	no	no
chr2	ENSG00000136699	biallelic	biallelic					2	0	2	SMPD4	130151392	130182750	sphingomyelin phosphodiesterase 4 [Source:HGNC Symbol;Acc:HGNC:32949]	no	no	no	no
chr2	ENSG00000136715	biallelic	biallelic			biallelic	biallelic	4	0	2	SAP130	127941217	128028120	Sin3A associated protein 130 [Source:HGNC Symbol;Acc:HGNC:29813]	no	no	no	no
chr2	ENSG00000136718	biallelic	biallelic	biallelic	biallelic			4	0	2	IMP4	130342877	130347967	IMP U3 small nucleolar ribonucleoprotein 4 [Source:HGNC Symbol;Acc:HGNC:30856]	no	no	no	no
chr2	ENSG00000136732	biallelic	biallelic	biallelic	biallelic	biallelic	biallelic	6	0	2	GYPC	126656133	126696667	glycophorin C (Gerbich blood group) [Source:HGNC Symbol;Acc:HGNC:4704]	no	no	no	no
chr2	ENSG00000138028	biallelic	biallelic	biallelic	biallelic	biallelic	biallelic	6	0	2	CGREF1	27098889	27119128	cell growth regulator with EF-hand domain 1 [Source:HGNC Symbol;Acc:HGNC:16962]	no	no	no	no
chr2	ENSG00000138029	biallelic	biallelic	biallelic	biallelic	biallelic		5	0	2	HADHB	26243170	26290465	hydroxyacyl-CoA dehydrogenase trifunctional multienzyme complex subunit beta [Source:HGNC Symbol;Acc:HGNC:4803]	no	no	no	no
chr2	ENSG00000138031	biallelic	biallelic			biallelic	biallelic	4	0	2	ADCY3	24819169	24920237	adenylate cyclase 3 [Source:HGNC Symbol;Acc:HGNC:234]	no	no	no	no
chr2	ENSG00000138050	biallelic	biallelic			biallelic	biallelic	4	0	2	THUMPD2	39736060	39779267	THUMP domain containing 2 [Source:HGNC Symbol;Acc:HGNC:14890]	no	no	no	no
chr2	ENSG00000138061	biallelic	biallelic			biallelic	biallelic	4	0	2	CYP1B1	38066973	38109902	cytochrome P450 family 1 subfamily B member 1 [Source:HGNC Symbol;Acc:HGNC:2597]	no	no	no	no
chr2	ENSG00000138073	biallelic	biallelic	biallelic	biallelic			4	0	2	PREB	27130756	27134666	prolactin regulatory element binding [Source:HGNC Symbol;Acc:HGNC:9356]	no	no	no	no
chr2	ENSG00000138074	biallelic	biallelic	biallelic	biallelic	biallelic	biallelic	6	0	2	SLC5A6	27199587	27212958	solute carrier family 5 member 6 [Source:HGNC Symbol;Acc:HGNC:11041]	no	no	no	no
chr2	ENSG00000138080	biallelic						1	0	2	EMILIN1	27078615	27086403	elastin microfibril interfacer 1 [Source:HGNC Symbol;Acc:HGNC:19880]	no	no	no	no
chr2	ENSG00000138081	biallelic	biallelic	biallelic	biallelic			4	0	2	FBXO11	47789316	47906498	F-box protein 11 [Source:HGNC Symbol;Acc:HGNC:13590]	no	no	no	no
chr2	ENSG00000138085	biallelic	biallelic	biallelic	biallelic	biallelic	biallelic	6	0	2	ATRAID	27212041	27217178	all-trans retinoic acid induced differentiation factor [Source:HGNC Symbol;Acc:HGNC:24090]	no	no	no	no
chr2	ENSG00000138095	biallelic	biallelic			biallelic	biallelic	4	0	2	LRPPRC	43886224	43996226	leucine rich pentatricopeptide repeat containing [Source:HGNC Symbol;Acc:HGNC:15714]	no	no	no	no
chr2	ENSG00000138356	biallelic	biallelic					2	0	2	AOX1	200586014	200677064	aldehyde oxidase 1 [Source:HGNC Symbol;Acc:HGNC:553]	no	no	no	no
chr2	ENSG00000138363	biallelic	biallelic					2	0	2	ATIC	215311956	215349773	5-aminoimidazole-4-carboxamide ribonucleotide formyltransferase/IMP cyclohydrolase [Source:HGNC Symbol;Acc:HGNC:794]	no	no	no	no
chr2	ENSG00000138376	biallelic	biallelic	biallelic	biallelic			4	0	2	BARD1	214725646	214809683	BRCA1 associated RING domain 1 [Source:HGNC Symbol;Acc:HGNC:952]	no	no	no	no
chr2	ENSG00000138380	biallelic	biallelic	biallelic	biallelic			4	0	2	CARF	202912214	202988263	calcium responsive transcription factor [Source:HGNC Symbol;Acc:HGNC:14435]	no	no	no	no
chr2	ENSG00000138398	biallelic	biallelic			biallelic	biallelic	4	0	2	PPIG	169584342	169641406	peptidylprolyl isomerase G [Source:HGNC Symbol;Acc:HGNC:14650]	no	no	no	no
chr2	ENSG00000138399	biallelic	biallelic			biallelic	biallelic	4	0	2	FASTKD1	169528508	169573875	FAST kinase domains 1 [Source:HGNC Symbol;Acc:HGNC:26150]	no	no	no	no
chr2	ENSG00000138400	biallelic	biallelic	biallelic	biallelic			4	0	2	MDH1B	206737763	206765328	malate dehydrogenase 1B [Source:HGNC Symbol;Acc:HGNC:17836]	no	no	no	no
chr2	ENSG00000138411	biallelic				biallelic		2	0	2	HECW2	196189099	196593684	HECT, C2 and WW domain containing E3 ubiquitin protein ligase 2 [Source:HGNC Symbol;Acc:HGNC:29853]	no	no	no	no
chr2	ENSG00000138434	biallelic		biallelic	biallelic	biallelic	biallelic	5	0	2	ITPRID2	181891730	181930738	ITPR interacting domain containing 2 [Source:HGNC Symbol;Acc:HGNC:11319]	no	no	no	no
chr2	ENSG00000138442	biallelic	biallelic	biallelic	biallelic			4	0	2	WDR12	202874261	203014798	WD repeat domain 12 [Source:HGNC Symbol;Acc:HGNC:14098]	no	no	no	no
chr2	ENSG00000142327	biallelic	biallelic			biallelic	biallelic	4	0	2	RNPEPL1	240565804	240581372	arginyl aminopeptidase like 1 [Source:HGNC Symbol;Acc:HGNC:10079]	no	no	no	no
chr2	ENSG00000142330	biallelic	biallelic			biallelic	biallelic	4	0	2	CAPN10	240586734	240617705	calpain 10 [Source:HGNC Symbol;Acc:HGNC:1477]	no	no	no	no
chr2	ENSG00000143727	biallelic	biallelic			biallelic	biallelic	4	0	2	ACP1	264140	278283	acid phosphatase 1 [Source:HGNC Symbol;Acc:HGNC:122]	no	no	no	no
chr2	ENSG00000143870	biallelic	biallelic	biallelic	biallelic	biallelic	biallelic	6	0	2	PDIA6	10783391	10837977	protein disulfide isomerase family A member 6 [Source:HGNC Symbol;Acc:HGNC:30168]	no	no	no	no
chr2	ENSG00000143924	biallelic	biallelic	biallelic	biallelic			4	0	2	EML4	42169353	42332548	EMAP like 4 [Source:HGNC Symbol;Acc:HGNC:1316]	no	no	no	no
chr2	ENSG00000143933	biallelic	biallelic	biallelic	biallelic			4	0	2	CALM2	47160084	47176921	calmodulin 2 [Source:HGNC Symbol;Acc:HGNC:1445]	no	no	no	no
chr2	ENSG00000143951	biallelic						1	0	2	WDPCP	63119559	63827843	WD repeat containing planar cell polarity effector [Source:HGNC Symbol;Acc:HGNC:28027]	no	no	no	no
chr2	ENSG00000143952	biallelic	biallelic					2	0	2	VPS54	63892146	64019428	VPS54 subunit of GARP complex [Source:HGNC Symbol;Acc:HGNC:18652]	no	no	no	no
chr2	ENSG00000143971	biallelic	biallelic	biallelic	biallelic	biallelic	biallelic	6	0	2	ETAA1	67397322	67412089	ETAA1 activator of ATR kinase [Source:HGNC Symbol;Acc:HGNC:24648]	no	no	no	no
chr2	ENSG00000144036	biallelic	biallelic			biallelic	biallelic	4	0	2	EXOC6B	72175984	72826041	exocyst complex component 6B [Source:HGNC Symbol;Acc:HGNC:17085]	no	no	no	no
chr2	ENSG00000144040	biallelic	biallelic					2	0	2	SFXN5	72942036	73075619	sideroflexin 5 [Source:HGNC Symbol;Acc:HGNC:16073]	no	no	no	no
chr2	ENSG00000144048	biallelic	biallelic	biallelic	biallelic			4	0	2	DUSP11	73761782	73780132	dual specificity phosphatase 11 [Source:HGNC Symbol;Acc:HGNC:3066]	no	no	no	no
chr2	ENSG00000144057	biallelic	biallelic	biallelic	biallelic			4	0	2	ST6GAL2	106801600	106887108	ST6 beta-galactoside alpha-2,6-sialyltransferase 2 [Source:HGNC Symbol;Acc:HGNC:10861]	no	no	no	no
chr2	ENSG00000144061	biallelic	biallelic	biallelic		biallelic	biallelic	5	0	2	NPHP1	110122311	110205066	nephrocystin 1 [Source:HGNC Symbol;Acc:HGNC:7905]	no	no	no	no
chr2	ENSG00000144120	biallelic	biallelic					2	0	2	TMEM177	119679167	119686507	transmembrane protein 177 [Source:HGNC Symbol;Acc:HGNC:28143]	no	no	no	no
chr2	ENSG00000144136	biallelic		biallelic	biallelic			3	0	2	SLC20A1	112645939	112663825	solute carrier family 20 member 1 [Source:HGNC Symbol;Acc:HGNC:10946]	no	no	no	no
chr2	ENSG00000144161	biallelic	biallelic					2	0	2	ZC3H8	112211529	112255136	zinc finger CCCH-type containing 8 [Source:HGNC Symbol;Acc:HGNC:30941]	no	no	no	no
chr2	ENSG00000144182	biallelic	biallelic			biallelic	biallelic	4	0	2	LIPT1	99154955	99163157	lipoyltransferase 1 [Source:HGNC Symbol;Acc:HGNC:29569]	no	no	no	no
chr2	ENSG00000144227	biallelic	biallelic					2	0	2	NXPH2	138669157	138780390	neurexophilin 2 [Source:HGNC Symbol;Acc:HGNC:8076]	no	no	no	no
chr2	ENSG00000144228	biallelic	biallelic					2	0	2	SPOPL	138501770	138573547	speckle type BTB/POZ protein like [Source:HGNC Symbol;Acc:HGNC:27934]	no	no	no	no
chr2	ENSG00000144229	biallelic						1	0	2	THSD7B	136765545	137677718	thrombospondin type 1 domain containing 7B [Source:HGNC Symbol;Acc:HGNC:29348]	no	no	no	no
chr2	ENSG00000144231	biallelic						1	0	2	POLR2D	127843553	127858155	RNA polymerase II subunit D [Source:HGNC Symbol;Acc:HGNC:9191]	no	no	no	no
chr2	ENSG00000144283	biallelic	biallelic	biallelic	biallelic	biallelic	biallelic	6	0	2	PKP4	158456952	158682879	plakophilin 4 [Source:HGNC Symbol;Acc:HGNC:9026]	no	no	no	no
chr2	ENSG00000144306	biallelic		biallelic	biallelic			3	0	2	SCRN3	174395730	174429575	secernin 3 [Source:HGNC Symbol;Acc:HGNC:30382]	no	no	no	no
chr2	ENSG00000144366	biallelic	biallelic					2	0	2	GULP1	188291669	188595931	GULP PTB domain containing engulfment adaptor 1 [Source:HGNC Symbol;Acc:HGNC:18649]	no	no	no	no
chr2	ENSG00000144381	biallelic	biallelic					2	0	2	HSPD1	197486584	197516737	heat shock protein family D (Hsp60) member 1 [Source:HGNC Symbol;Acc:HGNC:5261]	no	no	no	no
chr2	ENSG00000144395	biallelic	biallelic	biallelic	biallelic			4	0	2	CCDC150	196639554	196763490	coiled-coil domain containing 150 [Source:HGNC Symbol;Acc:HGNC:26834]	no	no	no	no
chr2	ENSG00000144451	biallelic	biallelic	biallelic	biallelic			4	0	2	SPAG16	213284389	214410501	sperm associated antigen 16 [Source:HGNC Symbol;Acc:HGNC:23225]	no	no	no	no
chr2	ENSG00000144488	biallelic	biallelic	biallelic	biallelic	biallelic	biallelic	6	0	2	ESPNL	238100340	238133287	espin like [Source:HGNC Symbol;Acc:HGNC:27937]	no	no	no	no
chr2	ENSG00000144524	biallelic		biallelic	biallelic			3	0	2	COPS7B	231781671	231809254	COP9 signalosome subunit 7B [Source:HGNC Symbol;Acc:HGNC:16760]	no	no	no	no
chr2	ENSG00000144535	biallelic	biallelic			biallelic	biallelic	4	0	2	DIS3L2	231961245	232344350	DIS3 like 3'-5' exoribonuclease 2 [Source:HGNC Symbol;Acc:HGNC:28648]	no	no	no	no
chr2	ENSG00000144567	biallelic	biallelic	biallelic	biallelic	biallelic	biallelic	6	0	2	RETREG2	219176225	219185475	reticulophagy regulator family member 2 [Source:HGNC Symbol;Acc:HGNC:28450]	no	no	no	no
chr2	ENSG00000144579	biallelic	biallelic			biallelic	biallelic	4	0	2	CTDSP1	218398256	218405941	CTD small phosphatase 1 [Source:HGNC Symbol;Acc:HGNC:21614]	no	no	no	no
chr2	ENSG00000144589	biallelic	biallelic	biallelic	biallelic	biallelic	biallelic	6	0	2	STK11IP	219597857	219616451	serine/threonine kinase 11 interacting protein [Source:HGNC Symbol;Acc:HGNC:19184]	no	no	no	no
chr2	ENSG00000144591	biallelic	biallelic			biallelic	biallelic	4	0	2	GMPPA	219498865	219513898	GDP-mannose pyrophosphorylase A [Source:HGNC Symbol;Acc:HGNC:22923]	no	no	no	no
chr2	ENSG00000146205	biallelic				biallelic	biallelic	3	0	2	ANO7	241188509	241225976	anoctamin 7 [Source:HGNC Symbol;Acc:HGNC:31677]	no	no	no	no
chr2	ENSG00000146556	biallelic	biallelic					2	0	2	WASH2P	113588550	113599034	WASP family homolog 2, pseudogene [Source:HGNC Symbol;Acc:HGNC:33145]	no	no	no	no
chr2	ENSG00000150551	biallelic		biallelic	biallelic	biallelic	biallelic	5	0	2	LYPD1	132643286	132671579	LY6/PLAUR domain containing 1 [Source:HGNC Symbol;Acc:HGNC:28431]	no	no	no	no
chr2	ENSG00000150722	biallelic	biallelic	biallelic	biallelic			4	0	2	PPP1R1C	181954241	182131398	protein phosphatase 1 regulatory inhibitor subunit 1C [Source:HGNC Symbol;Acc:HGNC:14940]	no	no	no	no
chr2	ENSG00000150938	biallelic	biallelic			biallelic	biallelic	4	0	2	CRIM1	36355778	36551135	cysteine rich transmembrane BMP regulator 1 [Source:HGNC Symbol;Acc:HGNC:2359]	no	no	no	no
chr2	ENSG00000151665	biallelic	biallelic	biallelic	biallelic	biallelic	biallelic	6	0	2	PIGF	46580937	46617055	phosphatidylinositol glycan anchor biosynthesis class F [Source:HGNC Symbol;Acc:HGNC:8962]	no	no	no	no
chr2	ENSG00000151689	biallelic	biallelic		biallelic		biallelic	4	0	2	INPP1	190343570	190371665	inositol polyphosphate-1-phosphatase [Source:HGNC Symbol;Acc:HGNC:6071]	no	no	no	no
chr2	ENSG00000151693	biallelic	biallelic	biallelic	biallelic			4	0	2	ASAP2	9206765	9405683	ArfGAP with SH3 domain, ankyrin repeat and PH domain 2 [Source:HGNC Symbol;Acc:HGNC:2721]	no	no	no	no
chr2	ENSG00000151694	biallelic		biallelic	biallelic			3	0	2	ADAM17	9488486	9556732	ADAM metallopeptidase domain 17 [Source:HGNC Symbol;Acc:HGNC:195]	no	no	no	no
chr2	ENSG00000151779	biallelic	biallelic					2	0	2	NBAS	15166916	15561340	NBAS subunit of NRZ tethering complex [Source:HGNC Symbol;Acc:HGNC:15625]	no	no	no	no
chr2	ENSG00000152076	biallelic	biallelic			biallelic	biallelic	4	0	2	CCDC74B	130139287	130145134	coiled-coil domain containing 74B [Source:HGNC Symbol;Acc:HGNC:25267]	no	no	no	no
chr2	ENSG00000152117	biallelic	biallelic	biallelic	biallelic			4	0	2	SMPD4BP	131492813	131521573	sphingomyelin phosphodiesterase 4B, pseudogene [Source:HGNC Symbol;Acc:HGNC:24761]	no	no	no	no
chr2	ENSG00000152127	biallelic	biallelic					2	0	2	MGAT5	134119983	134454621	alpha-1,6-mannosylglycoprotein 6-beta-N-acetylglucosaminyltransferase [Source:HGNC Symbol;Acc:HGNC:7049]	no	no	no	no
chr2	ENSG00000152518	biallelic						1	0	2	ZFP36L2	43222402	43226606	ZFP36 ring finger protein like 2 [Source:HGNC Symbol;Acc:HGNC:1108]	no	no	no	no
chr2	ENSG00000152527	biallelic	biallelic	biallelic	biallelic	biallelic	biallelic	6	0	2	PLEKHH2	43637260	43767987	pleckstrin homology, MyTH4 and FERM domain containing H2 [Source:HGNC Symbol;Acc:HGNC:30506]	no	no	no	no
chr2	ENSG00000153094	biallelic	biallelic	biallelic	biallelic	biallelic	biallelic	6	0	2	BCL2L11	111119378	111168445	BCL2 like 11 [Source:HGNC Symbol;Acc:HGNC:994]	no	no	no	no
chr2	ENSG00000153201	biallelic	biallelic					2	0	2	RANBP2	108719482	108785810	RAN binding protein 2 [Source:HGNC Symbol;Acc:HGNC:9848]	no	no	no	no
chr2	ENSG00000153208	biallelic	biallelic	biallelic	biallelic	biallelic	biallelic	6	0	2	MERTK	111898607	112029561	MER proto-oncogene, tyrosine kinase [Source:HGNC Symbol;Acc:HGNC:7027]	no	no	no	no
chr2	ENSG00000153214	biallelic	biallelic					2	0	2	TMEM87B	112055269	112119318	transmembrane protein 87B [Source:HGNC Symbol;Acc:HGNC:25913]	no	no	no	no
chr2	ENSG00000153246	biallelic		biallelic	biallelic			3	0	2	PLA2R1	159932006	160062615	phospholipase A2 receptor 1 [Source:HGNC Symbol;Acc:HGNC:9042]	no	no	no	no
chr2	ENSG00000153561	biallelic	biallelic	biallelic	biallelic	biallelic	biallelic	6	0	2	RMND5A	86720291	86778041	required for meiotic nuclear division 5 homolog A [Source:HGNC Symbol;Acc:HGNC:25850]	no	no	no	no
chr2	ENSG00000153827	biallelic	biallelic	biallelic	biallelic	biallelic	biallelic	6	0	2	TRIP12	229763837	229923239	thyroid hormone receptor interactor 12 [Source:HGNC Symbol;Acc:HGNC:12306]	no	no	no	no
chr2	ENSG00000154518	biallelic	biallelic	biallelic	biallelic	biallelic	biallelic	6	0	2	ATP5MC3	175176258	175181710	ATP synthase membrane subunit c locus 3 [Source:HGNC Symbol;Acc:HGNC:843]	no	no	no	no
chr2	ENSG00000155657	biallelic	biallelic			biallelic	biallelic	4	0	2	TTN	178525989	178830802	titin [Source:HGNC Symbol;Acc:HGNC:12403]	no	no	no	no
chr2	ENSG00000155729	biallelic	biallelic	biallelic	biallelic			4	0	2	KCTD18	200488958	200519784	potassium channel tetramerization domain containing 18 [Source:HGNC Symbol;Acc:HGNC:26446]	no	no	no	no
chr2	ENSG00000155755	biallelic	biallelic		biallelic			3	0	2	TMEM237	201620184	201643570	transmembrane protein 237 [Source:HGNC Symbol;Acc:HGNC:14432]	no	no	no	no
chr2	ENSG00000157827	biallelic	biallelic	biallelic	biallelic	biallelic	biallelic	6	0	2	FMNL2	152335174	152649826	formin like 2 [Source:HGNC Symbol;Acc:HGNC:18267]	no	no	no	no
chr2	ENSG00000157851	biallelic	biallelic	biallelic	biallelic	biallelic	biallelic	6	0	2	DPYSL5	26847747	26950351	dihydropyrimidinase like 5 [Source:HGNC Symbol;Acc:HGNC:20637]	no	no	no	no
chr2	ENSG00000157985	biallelic	biallelic	biallelic	biallelic	biallelic	biallelic	6	0	2	AGAP1	235494043	236131793	ArfGAP with GTPase domain, ankyrin repeat and PH domain 1 [Source:HGNC Symbol;Acc:HGNC:16922]	no	no	no	no
chr2	ENSG00000158089	biallelic	biallelic					2	0	2	GALNT14	30910467	31155202	polypeptide N-acetylgalactosaminyltransferase 14 [Source:HGNC Symbol;Acc:HGNC:22946]	no	no	no	no
chr2	ENSG00000158417	biallelic	biallelic			biallelic	biallelic	4	0	2	EIF5B	99337371	99401326	eukaryotic translation initiation factor 5B [Source:HGNC Symbol;Acc:HGNC:30793]	no	no	no	no
chr2	ENSG00000158435	biallelic	biallelic	biallelic	biallelic	biallelic	biallelic	6	0	2	CNOT11	101252886	101270316	CCR4-NOT transcription complex subunit 11 [Source:HGNC Symbol;Acc:HGNC:25217]	no	no	no	no
chr2	ENSG00000159399	biallelic	biallelic			biallelic	biallelic	4	0	2	HK2	74834127	74893359	hexokinase 2 [Source:HGNC Symbol;Acc:HGNC:4923]	no	no	no	no
chr2	ENSG00000162878	biallelic	biallelic	biallelic	biallelic	biallelic	biallelic	6	0	2	PKDCC	42048021	42058517	protein kinase domain containing, cytoplasmic [Source:HGNC Symbol;Acc:HGNC:25123]	no	no	no	no
chr2	ENSG00000162927	biallelic	biallelic	biallelic	biallelic	biallelic	biallelic	6	0	2	PUS10	60940222	61018259	pseudouridine synthase 10 [Source:HGNC Symbol;Acc:HGNC:26505]	no	no	no	no
chr2	ENSG00000162929	biallelic	biallelic	biallelic	biallelic	biallelic	biallelic	6	0	2	SANBR	61065871	61138034	SANT and BTB domain regulator of CSR [Source:HGNC Symbol;Acc:HGNC:29387]	no	no	no	no
chr2	ENSG00000163006	biallelic	biallelic					2	0	2	CCDC138	108786757	108885477	coiled-coil domain containing 138 [Source:HGNC Symbol;Acc:HGNC:26531]	no	no	no	no
chr2	ENSG00000163017	biallelic	biallelic	biallelic	biallelic	biallelic	biallelic	6	0	2	ACTG2	73892314	73919865	actin gamma 2, smooth muscle [Source:HGNC Symbol;Acc:HGNC:145]	no	no	no	no
chr2	ENSG00000163040	biallelic	biallelic			biallelic	biallelic	4	0	2	CCDC74A	131527675	131533666	coiled-coil domain containing 74A [Source:HGNC Symbol;Acc:HGNC:25197]	no	no	no	no
chr2	ENSG00000163053	biallelic	biallelic					2	0	2	SLC16A14	230034982	230068993	solute carrier family 16 member 14 [Source:HGNC Symbol;Acc:HGNC:26417]	no	no	no	no
chr2	ENSG00000163161	biallelic	biallelic	biallelic	biallelic	biallelic	biallelic	6	0	2	ERCC3	127257290	127294166	ERCC excision repair 3, TFIIH core complex helicase subunit [Source:HGNC Symbol;Acc:HGNC:3435]	no	no	no	no
chr2	ENSG00000163162	biallelic	biallelic	biallelic	biallelic	biallelic	biallelic	6	0	2	RNF149	101271219	101308701	ring finger protein 149 [Source:HGNC Symbol;Acc:HGNC:23137]	no	no	no	no
chr2	ENSG00000163214	biallelic	biallelic	biallelic	biallelic	biallelic	biallelic	6	0	2	DHX57	38797729	38875934	DExH-box helicase 57 [Source:HGNC Symbol;Acc:HGNC:20086]	no	no	no	no
chr2	ENSG00000163235	biallelic		biallelic	biallelic	biallelic	biallelic	5	0	2	TGFA	70447284	70554193	transforming growth factor alpha [Source:HGNC Symbol;Acc:HGNC:11765]	no	no	no	no
chr2	ENSG00000163251	biallelic	biallelic	biallelic	biallelic			4	0	2	FZD5	207762598	207769906	frizzled class receptor 5 [Source:HGNC Symbol;Acc:HGNC:4043]	no	no	no	no
chr2	ENSG00000163359	biallelic	biallelic	biallelic	biallelic	biallelic	biallelic	6	0	2	COL6A3	237324003	237414328	collagen type VI alpha 3 chain [Source:HGNC Symbol;Acc:HGNC:2213]	no	no	no	no
chr2	ENSG00000163449	biallelic	biallelic					2	0	2	TMEM169	216081866	216102783	transmembrane protein 169 [Source:HGNC Symbol;Acc:HGNC:25130]	no	no	no	no
chr2	ENSG00000163466	biallelic	biallelic	biallelic				3	0	2	ARPC2	218217141	218254356	actin related protein 2/3 complex subunit 2 [Source:HGNC Symbol;Acc:HGNC:705]	no	no	no	no
chr2	ENSG00000163481	biallelic	biallelic					2	0	2	RNF25	218663892	218672002	ring finger protein 25 [Source:HGNC Symbol;Acc:HGNC:14662]	no	no	no	no
chr2	ENSG00000163482	biallelic	biallelic	biallelic	biallelic	biallelic	biallelic	6	0	2	STK36	218672069	218702716	serine/threonine kinase 36 [Source:HGNC Symbol;Acc:HGNC:17209]	no	no	no	no
chr2	ENSG00000163492	biallelic	biallelic	biallelic	biallelic	biallelic	biallelic	6	0	2	CCDC141	178829757	179050137	coiled-coil domain containing 141 [Source:HGNC Symbol;Acc:HGNC:26821]	no	no	no	no
chr2	ENSG00000163510	biallelic						1	0	2	CWC22	179944876	180007297	CWC22 spliceosome associated protein homolog [Source:HGNC Symbol;Acc:HGNC:29322]	no	no	no	no
chr2	ENSG00000163535	biallelic	biallelic					2	0	2	SGO2	200510008	200584096	shugoshin 2 [Source:HGNC Symbol;Acc:HGNC:30812]	no	no	no	no
chr2	ENSG00000163798	biallelic	biallelic			biallelic	biallelic	4	0	2	SLC4A1AP	27663426	27695366	solute carrier family 4 member 1 adaptor protein [Source:HGNC Symbol;Acc:HGNC:13813]	no	no	no	no
chr2	ENSG00000163811	biallelic	biallelic	biallelic	biallelic	biallelic	biallelic	6	0	2	WDR43	28894667	28948219	WD repeat domain 43 [Source:HGNC Symbol;Acc:HGNC:28945]	no	no	no	no
chr2	ENSG00000168393	biallelic	biallelic	biallelic	biallelic	biallelic	biallelic	6	0	2	DTYMK	241675747	241686944	deoxythymidylate kinase [Source:HGNC Symbol;Acc:HGNC:3061]	no	no	no	no
chr2	ENSG00000168397	biallelic	biallelic	biallelic	biallelic	biallelic	biallelic	6	0	2	ATG4B	241637213	241673857	autophagy related 4B cysteine peptidase [Source:HGNC Symbol;Acc:HGNC:20790]	no	no	no	no
chr2	ENSG00000168763	biallelic	biallelic					2	0	2	CNNM3	96816245	96835382	cyclin and CBS domain divalent metal cation transport mediator 3 [Source:HGNC Symbol;Acc:HGNC:104]	no	no	no	no
chr2	ENSG00000168887	biallelic	biallelic					2	0	2	C2orf68	85605254	85612066	chromosome 2 open reading frame 68 [Source:HGNC Symbol;Acc:HGNC:34353]	no	no	no	no
chr2	ENSG00000168890	biallelic	biallelic	biallelic	biallelic			4	0	2	TMEM150A	85598547	85603196	transmembrane protein 150A [Source:HGNC Symbol;Acc:HGNC:24677]	no	no	no	no
chr2	ENSG00000168894	biallelic	biallelic	biallelic	biallelic			4	0	2	RNF181	85595725	85597708	ring finger protein 181 [Source:HGNC Symbol;Acc:HGNC:28037]	no	no	no	no
chr2	ENSG00000168899	biallelic	biallelic	biallelic	biallelic			4	0	2	VAMP5	85584431	85593406	vesicle associated membrane protein 5 [Source:HGNC Symbol;Acc:HGNC:12646]	no	no	no	no
chr2	ENSG00000169047	biallelic	biallelic			biallelic	biallelic	4	0	2	IRS1	226731312	226799820	insulin receptor substrate 1 [Source:HGNC Symbol;Acc:HGNC:6125]	no	no	no	no
chr2	ENSG00000169679	biallelic	biallelic					2	0	2	BUB1	110637528	110678063	BUB1 mitotic checkpoint serine/threonine kinase [Source:HGNC Symbol;Acc:HGNC:1148]	no	no	no	no
chr2	ENSG00000169967	biallelic	biallelic	biallelic	biallelic			4	0	2	MAP3K2	127298668	127388465	mitogen-activated protein kinase kinase kinase 2 [Source:HGNC Symbol;Acc:HGNC:6854]	no	no	no	no
chr2	ENSG00000170144	biallelic	biallelic					2	0	2	HNRNPA3	177212694	177223959	heterogeneous nuclear ribonucleoprotein A3 [Source:HGNC Symbol;Acc:HGNC:24941]	no	no	no	no
chr2	ENSG00000170264	biallelic	biallelic	biallelic	biallelic	biallelic	biallelic	6	0	2	FAM161A	61824848	61854143	FAM161 centrosomal protein A [Source:HGNC Symbol;Acc:HGNC:25808]	no	no	no	no
chr2	ENSG00000170745	biallelic	biallelic	biallelic	biallelic			4	0	2	KCNS3	17877847	18361616	potassium voltage-gated channel modifier subfamily S member 3 [Source:HGNC Symbol;Acc:HGNC:6302]	no	no	no	no
chr2	ENSG00000171227	biallelic						1	0	2	TMEM37	119429901	119438504	transmembrane protein 37 [Source:HGNC Symbol;Acc:HGNC:18216]	no	no	no	no
chr2	ENSG00000171853	biallelic	biallelic	biallelic	biallelic	biallelic	biallelic	6	0	2	TRAPPC12	3379675	3485094	trafficking protein particle complex subunit 12 [Source:HGNC Symbol;Acc:HGNC:24284]	no	no	no	no
chr2	ENSG00000171863	biallelic	biallelic	biallelic	biallelic			4	0	2	RPS7	3575260	3580920	ribosomal protein S7 [Source:HGNC Symbol;Acc:HGNC:10440]	no	no	no	no
chr2	ENSG00000171951	biallelic	biallelic					2	0	2	SCG2	223596940	223602361	secretogranin II [Source:HGNC Symbol;Acc:HGNC:10575]	no	no	no	no
chr2	ENSG00000172059	biallelic	biallelic	biallelic	biallelic	biallelic	biallelic	6	0	2	KLF11	10042849	10054836	KLF transcription factor 11 [Source:HGNC Symbol;Acc:HGNC:11811]	no	no	no	no
chr2	ENSG00000172071	biallelic	biallelic			biallelic	biallelic	4	0	2	EIF2AK3	88556741	88691518	eukaryotic translation initiation factor 2 alpha kinase 3 [Source:HGNC Symbol;Acc:HGNC:3255]	no	no	no	no
chr2	ENSG00000172073	biallelic	biallelic					2	0	2	TEX37	88524649	88529585	testis expressed 37 [Source:HGNC Symbol;Acc:HGNC:26341]	no	no	no	no
chr2	ENSG00000172554	biallelic	biallelic					2	0	2	SNTG2	950849	1367613	syntrophin gamma 2 [Source:HGNC Symbol;Acc:HGNC:13741]	no	no	no	no
chr2	ENSG00000172845	biallelic	biallelic	biallelic	biallelic	biallelic	biallelic	6	0	2	SP3	173880850	173965373	Sp3 transcription factor [Source:HGNC Symbol;Acc:HGNC:11208]	no	no	no	no
chr2	ENSG00000173163	biallelic	biallelic			biallelic	biallelic	4	0	2	COMMD1	61888724	62147247	copper metabolism domain containing 1 [Source:HGNC Symbol;Acc:HGNC:23024]	no	no	no	no
chr2	ENSG00000173209	biallelic	biallelic			biallelic	biallelic	4	0	2	AHSA2P	61177418	61191203	activator of HSP90 ATPase homolog 2, pseudogene [Source:HGNC Symbol;Acc:HGNC:20437]	no	no	no	no
chr2	ENSG00000173272	biallelic	biallelic					2	0	2	MZT2A	131464900	131492743	mitotic spindle organizing protein 2A [Source:HGNC Symbol;Acc:HGNC:33187]	no	no	no	no
chr2	ENSG00000173744	biallelic	biallelic	biallelic	biallelic			4	0	2	AGFG1	227472152	227561217	ArfGAP with FG repeats 1 [Source:HGNC Symbol;Acc:HGNC:5175]	no	no	no	no
chr2	ENSG00000175497	biallelic	biallelic					2	0	2	DPP10	114442299	115845780	dipeptidyl peptidase like 10 [Source:HGNC Symbol;Acc:HGNC:20823]	no	no	no	no
chr2	ENSG00000176946	biallelic	biallelic	biallelic	biallelic	biallelic	biallelic	6	0	2	THAP4	241584405	241637158	THAP domain containing 4 [Source:HGNC Symbol;Acc:HGNC:23187]	no	no	no	no
chr2	ENSG00000178295	biallelic	biallelic			biallelic	biallelic	4	0	2	GEN1	17753858	17788946	GEN1 Holliday junction 5' flap endonuclease [Source:HGNC Symbol;Acc:HGNC:26881]	no	no	no	no
chr2	ENSG00000178385	biallelic	biallelic			biallelic	biallelic	4	0	2	PLEKHM3	207821288	208025527	pleckstrin homology domain containing M3 [Source:HGNC Symbol;Acc:HGNC:34006]	no	no	no	no
chr2	ENSG00000178662	biallelic	biallelic	biallelic	biallelic	biallelic	biallelic	6	0	2	CSRNP3	165469647	165689407	cysteine and serine rich nuclear protein 3 [Source:HGNC Symbol;Acc:HGNC:30729]	no	no	no	no
chr2	ENSG00000180902	biallelic	biallelic			biallelic	biallelic	4	0	2	D2HGDH	241734602	241768816	D-2-hydroxyglutarate dehydrogenase [Source:HGNC Symbol;Acc:HGNC:28358]	no	no	no	no
chr2	ENSG00000182551	biallelic	biallelic			biallelic	biallelic	4	0	2	ADI1	3497366	3519531	acireductone dioxygenase 1 [Source:HGNC Symbol;Acc:HGNC:30576]	no	no	no	no
chr2	ENSG00000183091	biallelic	biallelic			biallelic	biallelic	4	0	2	NEB	151485336	151734487	nebulin [Source:HGNC Symbol;Acc:HGNC:7720]	no	no	no	no
chr2	ENSG00000183840	biallelic						1	0	2	GPR39	132416805	132646582	G protein-coupled receptor 39 [Source:HGNC Symbol;Acc:HGNC:4496]	no	no	no	no
chr2	ENSG00000184261	biallelic	biallelic	biallelic	biallelic			4	0	2	KCNK12	47509290	47570985	potassium two pore domain channel subfamily K member 12 [Source:HGNC Symbol;Acc:HGNC:6274]	no	no	no	no
chr2	ENSG00000184898	biallelic	biallelic					2	0	2	RBM43	151247940	151261863	RNA binding motif protein 43 [Source:HGNC Symbol;Acc:HGNC:24790]	no	no	no	no
chr2	ENSG00000186235	biallelic						1	0	2	LINC02610	238224552	238231711	long intergenic non-protein coding RNA 2610 [Source:HGNC Symbol;Acc:HGNC:27177]	no	no	no	no
chr2	ENSG00000186684	biallelic	biallelic	biallelic	biallelic			4	0	2	CYP27C1	127183832	127220313	cytochrome P450 family 27 subfamily C member 1 [Source:HGNC Symbol;Acc:HGNC:33480]	no	no	no	no
chr2	ENSG00000186889	biallelic	biallelic	biallelic		biallelic	biallelic	5	0	2	TMEM17	62500218	62511894	transmembrane protein 17 [Source:HGNC Symbol;Acc:HGNC:26623]	no	no	no	no
chr2	ENSG00000187231	biallelic	biallelic			biallelic	biallelic	4	0	2	SESTD1	179101678	179264832	SEC14 and spectrin domain containing 1 [Source:HGNC Symbol;Acc:HGNC:18379]	no	no	no	no
chr2	ENSG00000187605	biallelic	biallelic	biallelic	biallelic	biallelic	biallelic	6	0	2	TET3	73984910	74108176	tet methylcytosine dioxygenase 3 [Source:HGNC Symbol;Acc:HGNC:28313]	no	no	no	no
chr2	ENSG00000187699	biallelic	biallelic					2	0	2	C2orf88	189879609	190203484	chromosome 2 open reading frame 88 [Source:HGNC Symbol;Acc:HGNC:28191]	no	no	no	no
chr2	ENSG00000188010	biallelic	biallelic	biallelic	biallelic			4	0	2	MORN2	38875976	38929072	MORN repeat containing 2 [Source:HGNC Symbol;Acc:HGNC:30166]	no	no	no	no
chr2	ENSG00000188042	biallelic	biallelic					2	0	2	ARL4C	234493041	234497081	ADP ribosylation factor like GTPase 4C [Source:HGNC Symbol;Acc:HGNC:698]	no	no	no	no
chr2	ENSG00000189362	biallelic	biallelic	biallelic	biallelic	biallelic	biallelic	6	0	2	NEMP2	190504338	190534722	nuclear envelope integral membrane protein 2 [Source:HGNC Symbol;Acc:HGNC:33700]	no	no	no	no
chr2	ENSG00000196141	biallelic	biallelic	biallelic	biallelic	biallelic	biallelic	6	0	2	SPATS2L	200305881	200482264	spermatogenesis associated serine rich 2 like [Source:HGNC Symbol;Acc:HGNC:24574]	no	no	no	no
chr2	ENSG00000196151	biallelic	biallelic			biallelic	biallelic	4	0	2	WDSUB1	159235798	159286703	WD repeat, sterile alpha motif and U-box domain containing 1 [Source:HGNC Symbol;Acc:HGNC:26697]	no	no	no	no
chr2	ENSG00000196208	biallelic	biallelic	biallelic	biallelic	biallelic	biallelic	6	0	2	GREB1	11482341	11642788	growth regulating estrogen receptor binding 1 [Source:HGNC Symbol;Acc:HGNC:24885]	no	no	no	no
chr2	ENSG00000196290	biallelic	biallelic	biallelic	biallelic			4	0	2	NIF3L1	200889327	200903938	NGG1 interacting factor 3 like 1 [Source:HGNC Symbol;Acc:HGNC:13390]	no	no	no	no
chr2	ENSG00000196912	biallelic	biallelic	biallelic	biallelic			4	0	2	ANKRD36B	97492663	97589877	ankyrin repeat domain 36B [Source:HGNC Symbol;Acc:HGNC:29333]	no	no	no	no
chr2	ENSG00000196975	biallelic	biallelic	biallelic	biallelic			4	0	2	ANXA4	69644425	69827112	annexin A4 [Source:HGNC Symbol;Acc:HGNC:542]	no	no	no	no
chr2	ENSG00000197329	biallelic	biallelic			biallelic	biallelic	4	0	2	PELI1	64092652	64144420	pellino E3 ubiquitin protein ligase 1 [Source:HGNC Symbol;Acc:HGNC:8827]	no	no	no	no
chr2	ENSG00000197557	biallelic	biallelic	biallelic	biallelic			4	0	2	TTC30A	177612999	177618742	tetratricopeptide repeat domain 30A [Source:HGNC Symbol;Acc:HGNC:25853]	no	no	no	no
chr2	ENSG00000197756	biallelic	biallelic			biallelic	biallelic	4	0	2	RPL37A	216498825	216579180	ribosomal protein L37a [Source:HGNC Symbol;Acc:HGNC:10348]	no	no	no	no
chr2	ENSG00000198130	biallelic	biallelic					2	0	2	HIBCH	190189735	190344193	3-hydroxyisobutyryl-CoA hydrolase [Source:HGNC Symbol;Acc:HGNC:4908]	no	no	no	no
chr2	ENSG00000198142	biallelic	biallelic		biallelic			3	0	2	SOWAHC	109614364	109618990	sosondowah ankyrin repeat domain family member C [Source:HGNC Symbol;Acc:HGNC:26149]	no	no	no	no
chr2	ENSG00000198399	biallelic	biallelic	biallelic	biallelic	biallelic	biallelic	6	0	2	ITSN2	24202864	24360536	intersectin 2 [Source:HGNC Symbol;Acc:HGNC:6184]	no	no	no	no
chr2	ENSG00000198522	biallelic	biallelic					2	0	2	GPN1	27628247	27651511	GPN-loop GTPase 1 [Source:HGNC Symbol;Acc:HGNC:17030]	no	no	no	no
chr2	ENSG00000198648	biallelic		biallelic	biallelic	biallelic	biallelic	5	0	2	STK39	167954020	168247595	serine/threonine kinase 39 [Source:HGNC Symbol;Acc:HGNC:17717]	no	no	no	no
chr2	ENSG00000204262	biallelic	biallelic	biallelic	biallelic	biallelic	biallelic	6	0	2	COL5A2	189031898	189225312	collagen type V alpha 2 chain [Source:HGNC Symbol;Acc:HGNC:2210]	no	no	no	no
chr2	ENSG00000204634	biallelic	biallelic	biallelic	biallelic			4	0	2	TBC1D8	101007228	101252866	TBC1 domain family member 8 [Source:HGNC Symbol;Acc:HGNC:17791]	no	no	no	no
chr2	ENSG00000204843	biallelic	biallelic					2	0	2	DCTN1	74361154	74392087	dynactin subunit 1 [Source:HGNC Symbol;Acc:HGNC:2711]	no	no	no	no
chr2	ENSG00000213626	biallelic	biallelic					2	0	2	LBH	30231534	30323730	LBH regulator of WNT signaling pathway [Source:HGNC Symbol;Acc:HGNC:29532]	no	no	no	no
chr2	ENSG00000213639	biallelic	biallelic	biallelic	biallelic			4	0	2	PPP1CB	28751640	28802940	protein phosphatase 1 catalytic subunit beta [Source:HGNC Symbol;Acc:HGNC:9282]	no	no	no	no
chr2	ENSG00000214711	biallelic						1	0	2	CAPN14	31173056	31233858	calpain 14 [Source:HGNC Symbol;Acc:HGNC:16664]	no	no	no	no
chr2	ENSG00000219626	biallelic						1	0	2	FAM228B	24076526	24169640	family with sequence similarity 228 member B [Source:HGNC Symbol;Acc:HGNC:24736]	no	no	no	no
chr2	ENSG00000221823	biallelic	biallelic					2	0	2	PPP3R1	68178857	68256237	protein phosphatase 3 regulatory subunit B, alpha [Source:HGNC Symbol;Acc:HGNC:9317]	no	no	no	no
chr2	ENSG00000222224	biallelic	biallelic					2	0	2		28927243	28927340	Y RNA [Source:RFAM;Acc:RF00019]	no	no	no	no
chr2	ENSG00000223703	biallelic						1	0	2	IGSF3P2	91736726	91767439	IGSF3 pseudogene 2 [Source:HGNC Symbol;Acc:HGNC:55896]	no	no	no	no
chr2	ENSG00000225062	biallelic	biallelic					2	0	2	CATIP-AS1	218366661	218367885	CATIP antisense RNA 1 [Source:HGNC Symbol;Acc:HGNC:41080]	no	no	no	no
chr2	ENSG00000226479	biallelic	biallelic	biallelic	biallelic			4	0	2	TMEM185B	120217479	120223400	transmembrane protein 185B [Source:HGNC Symbol;Acc:HGNC:18896]	no	no	no	no
chr2	ENSG00000235078	biallelic						1	0	2		3519275	3523197	novel transcript, antisense to ADI1	no	no	no	no
chr2	ENSG00000239305	biallelic	biallelic					2	0	2	RNF103	86603398	86623866	ring finger protein 103 [Source:HGNC Symbol;Acc:HGNC:12859]	no	no	no	no
chr2	ENSG00000239467	biallelic	biallelic	biallelic	biallelic	biallelic	biallelic	6	0
chr2	ENSG00000239779	biallelic	biallelic				biallelic	3	0	2	WBP1	74458400	74460891	WW domain binding protein 1 [Source:HGNC Symbol;Acc:HGNC:12737]	no	no	no	no
chr2	ENSG00000240356	biallelic						1	0	2	RPL23AP7	113610502	113627090	ribosomal protein L23a pseudogene 7 [Source:HGNC Symbol;Acc:HGNC:17336]	no	no	no	no
chr2	ENSG00000243244	biallelic	biallelic	biallelic	biallelic			4	0	2	STON1	48529383	48598513	stonin 1 [Source:HGNC Symbol;Acc:HGNC:17003]	no	no	no	no
chr2	ENSG00000243667	biallelic	biallelic	biallelic	biallelic			4	0	2	DNAAF10	68122936	68157549	dynein axonemal assembly factor 10 [Source:HGNC Symbol;Acc:HGNC:25176]	no	no	no	no
chr2	ENSG00000270956	biallelic	biallelic					2	0	2		178541125	178541799	novel transcript, antisense to TTN	no	no	no	no
chr2	ENSG00000272807	biallelic	biallelic					2	0	2		210028417	210029156	novel transcript, antisense to KANSL1L	no	no	no	no
chr2	ENSG00000273045	biallelic	biallelic			biallelic	biallelic	4	0	2	C2orf15	99141707	99151669	chromosome 2 open reading frame 15 [Source:HGNC Symbol;Acc:HGNC:28436]	no	no	no	no
chr2	ENSG00000286058	biallelic						1	0	2		130026845	130051131	novel transcript	no	no	no	no
chr2	ENSG00000286360	biallelic	biallelic	biallelic	biallelic	biallelic	biallelic	6	0	2		61878940	61881353	novel transcript, antisense to CCT4	no	no	no	no
chr3	ENSG00000001617	biallelic	biallelic			biallelic	biallelic	4	0	3	SEMA3F	50155045	50189075	semaphorin 3F [Source:HGNC Symbol;Acc:HGNC:10728]	no	no	no	no
chr3	ENSG00000003756	biallelic	biallelic	biallelic	biallelic	biallelic	biallelic	6	0	3	RBM5	50088919	50119021	RNA binding motif protein 5 [Source:HGNC Symbol;Acc:HGNC:9902]	no	no	no	no
chr3	ENSG00000004399	biallelic	biallelic					2	0	3	PLXND1	129555214	129606676	plexin D1 [Source:HGNC Symbol;Acc:HGNC:9107]	no	no	no	no
chr3	ENSG00000004534	biallelic	biallelic	biallelic	biallelic	biallelic	biallelic	6	0	3	RBM6	49940007	50100045	RNA binding motif protein 6 [Source:HGNC Symbol;Acc:HGNC:9903]	no	no	no	no
chr3	ENSG00000007402	biallelic	biallelic					2	0	3	CACNA2D2	50362613	50504244	calcium voltage-gated channel auxiliary subunit alpha2delta 2 [Source:HGNC Symbol;Acc:HGNC:1400]	no	no	no	no
chr3	ENSG00000010322	biallelic	biallelic	biallelic	biallelic			4	0	3	NISCH	52455118	52493068	nischarin [Source:HGNC Symbol;Acc:HGNC:18006]	no	no	no	no
chr3	ENSG00000010327	biallelic	biallelic	biallelic	biallelic			4	0	3	STAB1	52495338	52524495	stabilin 1 [Source:HGNC Symbol;Acc:HGNC:18628]	no	no	no	no
chr3	ENSG00000011376	biallelic	biallelic	biallelic	biallelic	biallelic	biallelic	6	0	3	LARS2	45388561	45554726	leucyl-tRNA synthetase 2, mitochondrial [Source:HGNC Symbol;Acc:HGNC:17095]	no	no	no	no
chr3	ENSG00000012171	biallelic						1	0	3	SEMA3B	50267558	50277546	semaphorin 3B [Source:HGNC Symbol;Acc:HGNC:10724]	no	no	no	no
chr3	ENSG00000016391	biallelic	biallelic	biallelic	biallelic	biallelic	biallelic	6	0	3	CHDH	53812335	53846419	choline dehydrogenase [Source:HGNC Symbol;Acc:HGNC:24288]	no	no	no	no
chr3	ENSG00000016864	biallelic	biallelic					2	0	3	GLT8D1	52694486	52706032	glycosyltransferase 8 domain containing 1 [Source:HGNC Symbol;Acc:HGNC:24870]	no	no	no	no
chr3	ENSG00000017260	biallelic	biallelic					2	0	3	ATP2C1	130850595	131016712	ATPase secretory pathway Ca2+ transporting 1 [Source:HGNC Symbol;Acc:HGNC:13211]	no	no	no	no
chr3	ENSG00000041802	biallelic				biallelic	biallelic	3	0	3	LSG1	194640791	194672463	large 60S subunit nuclear export GTPase 1 [Source:HGNC Symbol;Acc:HGNC:25652]	no	no	no	no
chr3	ENSG00000047849	biallelic	biallelic	biallelic	biallelic	biallelic	biallelic	6	0	3	MAP4	47850690	48089272	microtubule associated protein 4 [Source:HGNC Symbol;Acc:HGNC:6862]	no	no	no	no
chr3	ENSG00000051341	biallelic	biallelic	biallelic	biallelic	biallelic	biallelic	6	0	3	POLQ	121431431	121545988	DNA polymerase theta [Source:HGNC Symbol;Acc:HGNC:9186]	no	no	no	no
chr3	ENSG00000053524	biallelic	biallelic			biallelic	biallelic	4	0	3	MCF2L2	183178041	183428778	MCF.2 cell line derived transforming sequence-like 2 [Source:HGNC Symbol;Acc:HGNC:30319]	no	no	no	no
chr3	ENSG00000056736	biallelic	biallelic	biallelic	biallelic	biallelic	biallelic	6	0	3	IL17RB	53846568	53865794	interleukin 17 receptor B [Source:HGNC Symbol;Acc:HGNC:18015]	no	no	no	no
chr3	ENSG00000057019	biallelic	biallelic	biallelic	biallelic			4	0	3	DCBLD2	98795941	98901695	discoidin, CUB and LCCL domain containing 2 [Source:HGNC Symbol;Acc:HGNC:24627]	no	no	no	no
chr3	ENSG00000058056	biallelic	biallelic	biallelic	biallelic			4	0	3	USP13	179653032	179804366	ubiquitin specific peptidase 13 [Source:HGNC Symbol;Acc:HGNC:12611]	no	no	no	no
chr3	ENSG00000058063	biallelic	biallelic			biallelic	biallelic	4	0	3	ATP11B	182793503	182921629	ATPase phospholipid transporting 11B (putative) [Source:HGNC Symbol;Acc:HGNC:13553]	no	no	no	no
chr3	ENSG00000058262	biallelic	biallelic					2	0	3	SEC61A1	128051641	128071705	SEC61 translocon subunit alpha 1 [Source:HGNC Symbol;Acc:HGNC:18276]	no	no	no	no
chr3	ENSG00000060971	biallelic	biallelic	biallelic	biallelic	biallelic	biallelic	6	0	3	ACAA1	38103129	38137242	acetyl-CoA acyltransferase 1 [Source:HGNC Symbol;Acc:HGNC:82]	no	no	no	no
chr3	ENSG00000061938	biallelic	biallelic			biallelic	biallelic	4	0	3	TNK2	195863364	195911945	tyrosine kinase non receptor 2 [Source:HGNC Symbol;Acc:HGNC:19297]	no	no	no	no
chr3	ENSG00000064225	biallelic	biallelic					2	0	3	ST3GAL6	98732236	98821201	ST3 beta-galactoside alpha-2,3-sialyltransferase 6 [Source:HGNC Symbol;Acc:HGNC:18080]	no	no	no	no
chr3	ENSG00000065534	biallelic	biallelic	biallelic	biallelic	biallelic	biallelic	6	0	3	MYLK	123610049	123884332	myosin light chain kinase [Source:HGNC Symbol;Acc:HGNC:7590]	no	no	no	no
chr3	ENSG00000068745	biallelic		biallelic	biallelic	biallelic	biallelic	5	0	3	IP6K2	48688003	48740353	inositol hexakisphosphate kinase 2 [Source:HGNC Symbol;Acc:HGNC:17313]	no	no	no	no
chr3	ENSG00000069849	biallelic	biallelic					2	0	3	ATP1B3	141876124	141926549	ATPase Na+/K+ transporting subunit beta 3 [Source:HGNC Symbol;Acc:HGNC:806]	no	no	no	no
chr3	ENSG00000070950	biallelic	biallelic	biallelic	biallelic			4	0	3	RAD18	8775402	8963773	RAD18 E3 ubiquitin protein ligase [Source:HGNC Symbol;Acc:HGNC:18278]	no	no	no	no
chr3	ENSG00000071282	biallelic	biallelic	biallelic	biallelic			4	0	3	LMCD1	8501807	8574668	LIM and cysteine rich domains 1 [Source:HGNC Symbol;Acc:HGNC:6633]	no	no	no	no
chr3	ENSG00000071794	biallelic	biallelic	biallelic	biallelic			4	0	3	HLTF	149030127	149086554	helicase like transcription factor [Source:HGNC Symbol;Acc:HGNC:11099]	no	no	no	no
chr3	ENSG00000072274	biallelic	biallelic	biallelic	biallelic		biallelic	5	0	3	TFRC	196012511	196082153	transferrin receptor [Source:HGNC Symbol;Acc:HGNC:11763]	no	no	no	no
chr3	ENSG00000072756	biallelic	biallelic					2	0	3	TRNT1	3126933	3153435	tRNA nucleotidyl transferase 1 [Source:HGNC Symbol;Acc:HGNC:17341]	no	no	no	no
chr3	ENSG00000073111	biallelic	biallelic					2	0	3	MCM2	127598410	127622436	minichromosome maintenance complex component 2 [Source:HGNC Symbol;Acc:HGNC:6944]	no	no	no	no
chr3	ENSG00000073711	biallelic	biallelic	biallelic	biallelic	biallelic	biallelic	6	0	3	PPP2R3A	135965728	136147894	protein phosphatase 2 regulatory subunit B''alpha [Source:HGNC Symbol;Acc:HGNC:9307]	no	no	no	no
chr3	ENSG00000073849	biallelic	biallelic					2	0	3	ST6GAL1	186930325	187078553	ST6 beta-galactoside alpha-2,6-sialyltransferase 1 [Source:HGNC Symbol;Acc:HGNC:10860]	no	no	no	no
chr3	ENSG00000075711	biallelic	biallelic			biallelic	biallelic	4	0	3	DLG1	197042560	197299330	discs large MAGUK scaffold protein 1 [Source:HGNC Symbol;Acc:HGNC:2900]	no	no	no	no
chr3	ENSG00000075914	biallelic	biallelic					2	0	3	EXOSC7	44975241	45036066	exosome component 7 [Source:HGNC Symbol;Acc:HGNC:28112]	no	no	no	no
chr3	ENSG00000075975	biallelic	biallelic	biallelic	biallelic	biallelic	biallelic	6	0	3	MKRN2	12557057	12586208	makorin ring finger protein 2 [Source:HGNC Symbol;Acc:HGNC:7113]	no	no	no	no
chr3	ENSG00000077097	biallelic	biallelic					2	0	3	TOP2B	25597978	25664909	DNA topoisomerase II beta [Source:HGNC Symbol;Acc:HGNC:11990]	no	no	no	no
chr3	ENSG00000079257	biallelic	biallelic	biallelic	biallelic	biallelic	biallelic	6	0	3	LXN	158645822	158672648	latexin [Source:HGNC Symbol;Acc:HGNC:13347]	no	no	no	no
chr3	ENSG00000080819	biallelic	biallelic	biallelic	biallelic	biallelic	biallelic	6	0	3	CPOX	98579446	98593648	coproporphyrinogen oxidase [Source:HGNC Symbol;Acc:HGNC:2321]	no	no	no	no
chr3	ENSG00000082996	biallelic	biallelic					2	0	3	RNF13	149812770	149962139	ring finger protein 13 [Source:HGNC Symbol;Acc:HGNC:10057]	no	no	no	no
chr3	ENSG00000088538	biallelic	biallelic					2	0	3	DOCK3	50674927	51384198	dedicator of cytokinesis 3 [Source:HGNC Symbol;Acc:HGNC:2989]	no	no	no	no
chr3	ENSG00000090530	biallelic	biallelic	biallelic	biallelic			4	0	3	P3H2	189956728	190122437	prolyl 3-hydroxylase 2 [Source:HGNC Symbol;Acc:HGNC:19317]	no	no	no	no
chr3	ENSG00000092345	biallelic				biallelic	biallelic	3	0	3	DAZL	16586792	16670306	deleted in azoospermia like [Source:HGNC Symbol;Acc:HGNC:2685]	no	no	no	no
chr3	ENSG00000093167	biallelic	biallelic	biallelic				3	0	3	LRRFIP2	37052626	37183689	LRR binding FLII interacting protein 2 [Source:HGNC Symbol;Acc:HGNC:6703]	no	no	no	no
chr3	ENSG00000113790	biallelic	biallelic					2	0	3	EHHADH	185190624	185281990	enoyl-CoA hydratase and 3-hydroxyacyl CoA dehydrogenase [Source:HGNC Symbol;Acc:HGNC:3247]	no	no	no	no
chr3	ENSG00000113810	biallelic	biallelic			biallelic		3	0	3	SMC4	160399274	160434954	structural maintenance of chromosomes 4 [Source:HGNC Symbol;Acc:HGNC:14013]	no	no	no	no
chr3	ENSG00000113811	biallelic	biallelic			biallelic	biallelic	4	0	3	SELENOK	53884417	53891885	selenoprotein K [Source:HGNC Symbol;Acc:HGNC:30394]	no	no	no	no
chr3	ENSG00000113812	biallelic	biallelic			biallelic	biallelic	4	0	3	ACTR8	53867066	53882152	actin related protein 8 [Source:HGNC Symbol;Acc:HGNC:14672]	no	no	no	no
chr3	ENSG00000114021	biallelic	biallelic					2	0	3	NIT2	100334739	100361635	nitrilase family member 2 [Source:HGNC Symbol;Acc:HGNC:29878]	no	no	no	no
chr3	ENSG00000114054	biallelic	biallelic					2	0	3	PCCB	136250340	136337896	propionyl-CoA carboxylase subunit beta [Source:HGNC Symbol;Acc:HGNC:8654]	no	no	no	no
chr3	ENSG00000114107	biallelic	biallelic			biallelic	biallelic	4	0	3	CEP70	138494344	138594538	centrosomal protein 70 [Source:HGNC Symbol;Acc:HGNC:29972]	no	no	no	no
chr3	ENSG00000114115	biallelic	biallelic					2	0	3	RBP1	139517434	139539829	retinol binding protein 1 [Source:HGNC Symbol;Acc:HGNC:9919]	no	no	no	no
chr3	ENSG00000114200	biallelic	biallelic			biallelic	biallelic	4	0	3	BCHE	165772904	165837462	butyrylcholinesterase [Source:HGNC Symbol;Acc:HGNC:983]	no	no	no	no
chr3	ENSG00000114270	biallelic	biallelic	biallelic	biallelic	biallelic	biallelic	6	0	3	COL7A1	48564073	48595329	collagen type VII alpha 1 chain [Source:HGNC Symbol;Acc:HGNC:2214]	no	no	no	no
chr3	ENSG00000114315	biallelic	biallelic					2	0	3	HES1	194136148	194138732	hes family bHLH transcription factor 1 [Source:HGNC Symbol;Acc:HGNC:5192]	no	no	no	no
chr3	ENSG00000114346	biallelic	biallelic					2	0	3	ECT2	172750682	172821474	epithelial cell transforming 2 [Source:HGNC Symbol;Acc:HGNC:3155]	no	no	no	no
chr3	ENSG00000114378	biallelic	biallelic	biallelic	biallelic			4	0	3	HYAL1	50299890	50312381	hyaluronidase 1 [Source:HGNC Symbol;Acc:HGNC:5320]	no	no	no	no
chr3	ENSG00000114391	biallelic	biallelic			biallelic	biallelic	4	0	3	RPL24	101681091	101686733	ribosomal protein L24 [Source:HGNC Symbol;Acc:HGNC:10325]	no	no	no	no
chr3	ENSG00000114423	biallelic	biallelic	biallelic	biallelic			4	0	3	CBLB	105655461	105869552	Cbl proto-oncogene B [Source:HGNC Symbol;Acc:HGNC:1542]	no	no	no	no
chr3	ENSG00000114480	biallelic		biallelic	biallelic			3	0	3	GBE1	81489703	81761645	1,4-alpha-glucan branching enzyme 1 [Source:HGNC Symbol;Acc:HGNC:4180]	no	no	no	no
chr3	ENSG00000114503	biallelic	biallelic					2	0	3	NCBP2	196935402	196942594	nuclear cap binding protein subunit 2 [Source:HGNC Symbol;Acc:HGNC:7659]	no	no	no	no
chr3	ENSG00000114529	biallelic	biallelic					2	0	3	C3orf52	112086335	112131004	chromosome 3 open reading frame 52 [Source:HGNC Symbol;Acc:HGNC:26255]	no	no	no	no
chr3	ENSG00000114554	biallelic	biallelic					2	0	3	PLXNA1	126982693	127037389	plexin A1 [Source:HGNC Symbol;Acc:HGNC:9099]	no	no	no	no
chr3	ENSG00000114573	biallelic	biallelic					2	0	3	ATP6V1A	113746770	113812056	ATPase H+ transporting V1 subunit A [Source:HGNC Symbol;Acc:HGNC:851]	no	no	no	no
chr3	ENSG00000114626	biallelic	biallelic			biallelic	biallelic	4	0	3	ABTB1	127672935	127680926	ankyrin repeat and BTB domain containing 1 [Source:HGNC Symbol;Acc:HGNC:18275]	no	no	no	no
chr3	ENSG00000114646	biallelic	biallelic	biallelic	biallelic			4	0	3	CSPG5	47562238	47580792	chondroitin sulfate proteoglycan 5 [Source:HGNC Symbol;Acc:HGNC:2467]	no	no	no	no
chr3	ENSG00000114698	biallelic	biallelic	biallelic	biallelic	biallelic	biallelic	6	0	3	PLSCR4	146192335	146251179	phospholipid scramblase 4 [Source:HGNC Symbol;Acc:HGNC:16497]	no	no	no	no
chr3	ENSG00000114742	biallelic	biallelic	biallelic	biallelic	biallelic	biallelic	6	0	3	WDR48	39052013	39096671	WD repeat domain 48 [Source:HGNC Symbol;Acc:HGNC:30914]	no	no	no	no
chr3	ENSG00000114744	biallelic				biallelic	biallelic	3	0	3	COMMD2	149738472	149752495	COMM domain containing 2 [Source:HGNC Symbol;Acc:HGNC:24993]	no	no	no	no
chr3	ENSG00000114745	biallelic	biallelic	biallelic	biallelic		biallelic	5	0	3	GORASP1	39095222	39108369	golgi reassembly stacking protein 1 [Source:HGNC Symbol;Acc:HGNC:16769]	no	no	no	no
chr3	ENSG00000114770	biallelic	biallelic	biallelic	biallelic	biallelic	biallelic	6	0	3	ABCC5	183919934	184017939	ATP binding cassette subfamily C member 5 [Source:HGNC Symbol;Acc:HGNC:56]	no	no	no	no
chr3	ENSG00000114784	biallelic						1	0	3	EIF1B	40309707	40312424	eukaryotic translation initiation factor 1B [Source:HGNC Symbol;Acc:HGNC:30792]	no	no	no	no
chr3	ENSG00000114796	biallelic	biallelic	biallelic	biallelic	biallelic	biallelic	6	0	3	KLHL24	183635610	183684519	kelch like family member 24 [Source:HGNC Symbol;Acc:HGNC:25947]	no	no	no	no
chr3	ENSG00000114805	biallelic	biallelic			biallelic	biallelic	4	0	3	PLCH1	155375580	155745071	phospholipase C eta 1 [Source:HGNC Symbol;Acc:HGNC:29185]	no	no	no	no
chr3	ENSG00000114812	biallelic			biallelic			2	0	3	VIPR1	42489299	42537573	vasoactive intestinal peptide receptor 1 [Source:HGNC Symbol;Acc:HGNC:12694]	no	no	no	no
chr3	ENSG00000114859	biallelic	biallelic	biallelic		biallelic	biallelic	5	0	3	CLCN2	184346185	184361650	chloride voltage-gated channel 2 [Source:HGNC Symbol;Acc:HGNC:2020]	no	no	no	no
chr3	ENSG00000114902	biallelic	biallelic					2	0	3	SPCS1	52704955	52711148	signal peptidase complex subunit 1 [Source:HGNC Symbol;Acc:HGNC:23401]	no	no	no	no
chr3	ENSG00000114904	biallelic	biallelic					2	0	3	NEK4	52708444	52770946	NIMA related kinase 4 [Source:HGNC Symbol;Acc:HGNC:11399]	no	no	no	no
chr3	ENSG00000118007	biallelic	biallelic	biallelic	biallelic	biallelic	biallelic	6	0	3	STAG1	136336236	136752403	stromal antigen 1 [Source:HGNC Symbol;Acc:HGNC:11354]	no	no	no	no
chr3	ENSG00000120742	biallelic						1	0	3	SERP1	150541998	150603228	stress associated endoplasmic reticulum protein 1 [Source:HGNC Symbol;Acc:HGNC:10759]	no	no	no	no
chr3	ENSG00000121440	biallelic	biallelic	biallelic	biallelic			4	0	3	PDZRN3	73382431	73624941	PDZ domain containing ring finger 3 [Source:HGNC Symbol;Acc:HGNC:17704]	no	no	no	no
chr3	ENSG00000121570	biallelic	biallelic	biallelic	biallelic	biallelic	biallelic	6	0	3	DPPA4	109326144	109337546	developmental pluripotency associated 4 [Source:HGNC Symbol;Acc:HGNC:19200]	no	no	no	no
chr3	ENSG00000121578	biallelic	biallelic			biallelic	biallelic	4	0	3	B4GALT4	119211732	119240946	beta-1,4-galactosyltransferase 4 [Source:HGNC Symbol;Acc:HGNC:927]	no	no	no	no
chr3	ENSG00000122068	biallelic	biallelic					2	0	3	FYTTD1	197737179	197787596	forty-two-three domain containing 1 [Source:HGNC Symbol;Acc:HGNC:25407]	no	no	no	no
chr3	ENSG00000129055	biallelic	biallelic			biallelic	biallelic	4	0	3	ANAPC13	134477706	134486716	anaphase promoting complex subunit 13 [Source:HGNC Symbol;Acc:HGNC:24540]	no	no	no	no
chr3	ENSG00000129071	biallelic						1	0	3	MBD4	129430947	129440179	methyl-CpG binding domain 4, DNA glycosylase [Source:HGNC Symbol;Acc:HGNC:6919]	no	no	no	no
chr3	ENSG00000131373	biallelic	biallelic					2	0	3	HACL1	15560699	15601852	2-hydroxyacyl-CoA lyase 1 [Source:HGNC Symbol;Acc:HGNC:17856]	no	no	no	no
chr3	ENSG00000131378	biallelic	biallelic					2	0	3	RFTN1	16313574	16514026	raftlin, lipid raft linker 1 [Source:HGNC Symbol;Acc:HGNC:30278]	no	no	no	no
chr3	ENSG00000131381	biallelic	biallelic					2	0	3	RBSN	15070073	15099163	rabenosyn, RAB effector [Source:HGNC Symbol;Acc:HGNC:20759]	no	no	no	no
chr3	ENSG00000131389	biallelic	biallelic		biallelic	biallelic	biallelic	5	0	3	SLC6A6	14402576	14489349	solute carrier family 6 member 6 [Source:HGNC Symbol;Acc:HGNC:11052]	no	no	no	no
chr3	ENSG00000132155	biallelic	biallelic	biallelic	biallelic			4	0	3	RAF1	12582101	12664201	Raf-1 proto-oncogene, serine/threonine kinase [Source:HGNC Symbol;Acc:HGNC:9829]	no	no	no	no
chr3	ENSG00000132182	biallelic	biallelic	biallelic	biallelic	biallelic	biallelic	6	0	3	NUP210	13316235	13420322	nucleoporin 210 [Source:HGNC Symbol;Acc:HGNC:30052]	no	no	no	no
chr3	ENSG00000133657	biallelic				biallelic	biallelic	3	0	3	ATP13A3	194402672	194498364	ATPase 13A3 [Source:HGNC Symbol;Acc:HGNC:24113]	no	no	no	no
chr3	ENSG00000134077	biallelic	biallelic	biallelic	biallelic	biallelic	biallelic	6	0	3	THUMPD3	9362971	9386791	THUMP domain containing 3 [Source:HGNC Symbol;Acc:HGNC:24493]	no	no	no	no
chr3	ENSG00000134109	biallelic	biallelic					2	0	3	EDEM1	5187646	5219958	ER degradation enhancing alpha-mannosidase like protein 1 [Source:HGNC Symbol;Acc:HGNC:18967]	no	no	no	no
chr3	ENSG00000136059	biallelic	biallelic				biallelic	3	0	3	VILL	37988059	38007188	villin like [Source:HGNC Symbol;Acc:HGNC:30906]	no	no	no	no
chr3	ENSG00000136068	biallelic	biallelic	biallelic	biallelic	biallelic	biallelic	6	0	3	FLNB	58008398	58172251	filamin B [Source:HGNC Symbol;Acc:HGNC:3755]	no	no	no	no
chr3	ENSG00000136527	biallelic	biallelic					2	0	3	TRA2B	185914558	185938103	transformer 2 beta homolog [Source:HGNC Symbol;Acc:HGNC:10781]	no	no	no	no
chr3	ENSG00000138463	biallelic	biallelic	biallelic	biallelic			4	0	3	SLC49A4	122795069	122881139	solute carrier family 49 member 4 [Source:HGNC Symbol;Acc:HGNC:16628]	no	no	no	no
chr3	ENSG00000138468	biallelic	biallelic	biallelic	biallelic	biallelic	biallelic	6	0	3	SENP7	101324205	101513241	SUMO specific peptidase 7 [Source:HGNC Symbol;Acc:HGNC:30402]	no	no	no	no
chr3	ENSG00000144455	biallelic	biallelic	biallelic	biallelic	biallelic	biallelic	6	0	3	SUMF1	3700814	4467273	sulfatase modifying factor 1 [Source:HGNC Symbol;Acc:HGNC:20376]	no	no	no	no
chr3	ENSG00000144554	biallelic	biallelic	biallelic	biallelic	biallelic	biallelic	6	0	3	FANCD2	10026370	10101932	FA complementation group D2 [Source:HGNC Symbol;Acc:HGNC:3585]	no	no	no	no
chr3	ENSG00000144566	biallelic	biallelic					2	0	3	RAB5A	19947097	19985175	RAB5A, member RAS oncogene family [Source:HGNC Symbol;Acc:HGNC:9783]	no	no	no	no
chr3	ENSG00000144596	biallelic	biallelic	biallelic	biallelic	biallelic	biallelic	6	0	3	GRIP2	14489107	14556075	glutamate receptor interacting protein 2 [Source:HGNC Symbol;Acc:HGNC:23841]	no	no	no	no
chr3	ENSG00000144597	biallelic	biallelic	biallelic	biallelic	biallelic	biallelic	6	0	3	EAF1	15427598	15450635	ELL associated factor 1 [Source:HGNC Symbol;Acc:HGNC:20907]	no	no	no	no
chr3	ENSG00000144645	biallelic	biallelic	biallelic	biallelic	biallelic	biallelic	6	0	3	OSBPL10	31657912	32077580	oxysterol binding protein like 10 [Source:HGNC Symbol;Acc:HGNC:16395]	no	no	no	no
chr3	ENSG00000144647	biallelic	biallelic	biallelic	biallelic	biallelic	biallelic	6	0	3	POMGNT2	43079229	43106085	protein O-linked mannose N-acetylglucosaminyltransferase 2 (beta 1,4-) [Source:HGNC Symbol;Acc:HGNC:25902]	no	no	no	no
chr3	ENSG00000144649	biallelic	biallelic	biallelic	biallelic			4	0	3	GASK1A	42979087	43067898	golgi associated kinase 1A [Source:HGNC Symbol;Acc:HGNC:24485]	no	no	no	no
chr3	ENSG00000144655	biallelic	biallelic	biallelic	biallelic	biallelic	biallelic	6	0	3	CSRNP1	39141855	39154562	cysteine and serine rich nuclear protein 1 [Source:HGNC Symbol;Acc:HGNC:14300]	no	no	no	no
chr3	ENSG00000144668	biallelic			biallelic			2	0	3	ITGA9	37452115	37823507	integrin subunit alpha 9 [Source:HGNC Symbol;Acc:HGNC:6145]	no	no	no	no
chr3	ENSG00000144674	biallelic	biallelic	biallelic	biallelic	biallelic	biallelic	6	0	3	GOLGA4	37243191	37366879	golgin A4 [Source:HGNC Symbol;Acc:HGNC:4427]	no	no	no	no
chr3	ENSG00000144677	biallelic	biallelic					2	0	3	CTDSPL	37861880	37984469	CTD small phosphatase like [Source:HGNC Symbol;Acc:HGNC:16890]	no	no	no	no
chr3	ENSG00000144681	biallelic	biallelic					2	0	3	STAC	36380503	36548007	SH3 and cysteine rich domain [Source:HGNC Symbol;Acc:HGNC:11353]	no	no	no	no
chr3	ENSG00000144711	biallelic	biallelic					2	0	3	IQSEC1	12897043	13283281	IQ motif and Sec7 domain ArfGEF 1 [Source:HGNC Symbol;Acc:HGNC:29112]	no	no	no	no
chr3	ENSG00000144724	biallelic	biallelic			biallelic	biallelic	4	0	3	PTPRG	61561569	62297609	protein tyrosine phosphatase receptor type G [Source:HGNC Symbol;Acc:HGNC:9671]	no	no	no	no
chr3	ENSG00000144736	biallelic	biallelic					2	0	3	SHQ1	72749277	72861914	SHQ1, H/ACA ribonucleoprotein assembly factor [Source:HGNC Symbol;Acc:HGNC:25543]	no	no	no	no
chr3	ENSG00000144741	biallelic	biallelic	biallelic	biallelic	biallelic	biallelic	6	0	3	SLC25A26	66133610	66388116	solute carrier family 25 member 26 [Source:HGNC Symbol;Acc:HGNC:20661]	no	no	no	no
chr3	ENSG00000144749	biallelic	biallelic	biallelic	biallelic	biallelic	biallelic	6	0	3	LRIG1	66378797	66501263	leucine rich repeats and immunoglobulin like domains 1 [Source:HGNC Symbol;Acc:HGNC:17360]	no	no	no	no
chr3	ENSG00000144802	biallelic	biallelic	biallelic	biallelic			4	0	3	NFKBIZ	101827991	101861022	NFKB inhibitor zeta [Source:HGNC Symbol;Acc:HGNC:29805]	no	no	no	no
chr3	ENSG00000144824	biallelic	biallelic			biallelic	biallelic	4	0	3	PHLDB2	111732497	111976517	pleckstrin homology like domain family B member 2 [Source:HGNC Symbol;Acc:HGNC:29573]	no	no	no	no
chr3	ENSG00000144834	biallelic	biallelic					2	0	3	TAGLN3	111998739	112013887	transgelin 3 [Source:HGNC Symbol;Acc:HGNC:29868]	no	no	no	no
chr3	ENSG00000144843	biallelic		biallelic	biallelic	biallelic	biallelic	5	0	3	ADPRH	119579268	119589945	ADP-ribosylarginine hydrolase [Source:HGNC Symbol;Acc:HGNC:269]	no	no	no	no
chr3	ENSG00000144852	biallelic						1	0	3	NR1I2	119780484	119818487	nuclear receptor subfamily 1 group I member 2 [Source:HGNC Symbol;Acc:HGNC:7968]	no	no	no	no
chr3	ENSG00000144857	biallelic	biallelic	biallelic	biallelic	biallelic	biallelic	6	0	3	BOC	113211003	113287459	BOC cell adhesion associated, oncogene regulated [Source:HGNC Symbol;Acc:HGNC:17173]	no	no	no	no
chr3	ENSG00000144867	biallelic	biallelic					2	0	3	SRPRB	133784023	133825772	SRP receptor subunit beta [Source:HGNC Symbol;Acc:HGNC:24085]	no	no	no	no
chr3	ENSG00000144893	biallelic	biallelic	biallelic	biallelic	biallelic	biallelic	6	0	3	MED12L	151085286	151437072	mediator complex subunit 12L [Source:HGNC Symbol;Acc:HGNC:16050]	no	no	no	no
chr3	ENSG00000144908	biallelic						1	0	3	ALDH1L1	126103562	126197994	aldehyde dehydrogenase 1 family member L1 [Source:HGNC Symbol;Acc:HGNC:3978]	no	no	no	no
chr3	ENSG00000144935	biallelic	biallelic	biallelic	biallelic	biallelic	biallelic	6	0	3	TRPC1	142724034	142807888	transient receptor potential cation channel subfamily C member 1 [Source:HGNC Symbol;Acc:HGNC:12333]	no	no	no	no
chr3	ENSG00000145012	biallelic	biallelic	biallelic	biallelic	biallelic	biallelic	6	0	3	LPP	188153284	188890671	LIM domain containing preferred translocation partner in lipoma [Source:HGNC Symbol;Acc:HGNC:6679]	no	no	no	no
chr3	ENSG00000145014	biallelic	biallelic			biallelic	biallelic	4	0	3	TMEM44	194587673	194633689	transmembrane protein 44 [Source:HGNC Symbol;Acc:HGNC:25120]	no	no	no	no
chr3	ENSG00000145016	biallelic	biallelic					2	0	3	RUBCN	197668867	197749727	rubicon autophagy regulator [Source:HGNC Symbol;Acc:HGNC:28991]	no	no	no	no
chr3	ENSG00000145088	biallelic	biallelic	biallelic	biallelic			4	0	3	EAF2	121835183	121886526	ELL associated factor 2 [Source:HGNC Symbol;Acc:HGNC:23115]	no	no	no	no
chr3	ENSG00000145113	biallelic	biallelic	biallelic	biallelic		biallelic	5	0	3	MUC4	195746765	195811973	mucin 4, cell surface associated [Source:HGNC Symbol;Acc:HGNC:7514]	no	no	no	no
chr3	ENSG00000150995	biallelic	biallelic	biallelic	biallelic	biallelic	biallelic	6	0	3	ITPR1	4493345	4847506	inositol 1,4,5-trisphosphate receptor type 1 [Source:HGNC Symbol;Acc:HGNC:6180]	no	no	no	no
chr3	ENSG00000151092	biallelic	biallelic					2	0	3	NGLY1	25718944	25790039	N-glycanase 1 [Source:HGNC Symbol;Acc:HGNC:17646]	no	no	no	no
chr3	ENSG00000151276	biallelic	biallelic		biallelic			3	0	3	MAGI1	65353525	66038918	membrane associated guanylate kinase, WW and PDZ domain containing 1 [Source:HGNC Symbol;Acc:HGNC:946]	no	no	no	no
chr3	ENSG00000151576	biallelic	biallelic					2	0	3	QTRT2	114005833	114088422	queuine tRNA-ribosyltransferase accessory subunit 2 [Source:HGNC Symbol;Acc:HGNC:25771]	no	no	no	no
chr3	ENSG00000151789	biallelic	biallelic			biallelic	biallelic	4	0	3	ZNF385D	21412218	22373321	zinc finger protein 385D [Source:HGNC Symbol;Acc:HGNC:26191]	no	no	no	no
chr3	ENSG00000152492	biallelic	biallelic	biallelic	biallelic	biallelic	biallelic	6	0	3	CCDC50	191329085	191398659	coiled-coil domain containing 50 [Source:HGNC Symbol;Acc:HGNC:18111]	no	no	no	no
chr3	ENSG00000152642	biallelic	biallelic	biallelic	biallelic	biallelic	biallelic	6	0	3	GPD1L	32105689	32168709	glycerol-3-phosphate dehydrogenase 1 like [Source:HGNC Symbol;Acc:HGNC:28956]	no	no	no	no
chr3	ENSG00000153560	biallelic	biallelic	biallelic	biallelic	biallelic	biallelic	6	0	3	UBP1	33388336	33441371	upstream binding protein 1 [Source:HGNC Symbol;Acc:HGNC:12507]	no	no	no	no
chr3	ENSG00000153767	biallelic	biallelic	biallelic	biallelic	biallelic	biallelic	6	0	3	GTF2E1	120742637	120783069	general transcription factor IIE subunit 1 [Source:HGNC Symbol;Acc:HGNC:4650]	no	no	no	no
chr3	ENSG00000154174	biallelic	biallelic				biallelic	3	0	3	TOMM70	100363431	100401089	translocase of outer mitochondrial membrane 70 [Source:HGNC Symbol;Acc:HGNC:11985]	no	no	no	no
chr3	ENSG00000154310	biallelic	biallelic			biallelic	biallelic	4	0	3	TNIK	171058414	171460408	TRAF2 and NCK interacting kinase [Source:HGNC Symbol;Acc:HGNC:30765]	no	no	no	no
chr3	ENSG00000154813	biallelic	biallelic					2	0	3	DPH3	16257061	16264969	diphthamide biosynthesis 3 [Source:HGNC Symbol;Acc:HGNC:27717]	no	no	no	no
chr3	ENSG00000154814	biallelic	biallelic			biallelic	biallelic	4	0	3	OXNAD1	16265160	16350299	oxidoreductase NAD binding domain containing 1 [Source:HGNC Symbol;Acc:HGNC:25128]	no	no	no	no
chr3	ENSG00000154822	biallelic	biallelic	biallelic	biallelic	biallelic	biallelic	6	0	3	PLCL2	16802651	17090604	phospholipase C like 2 [Source:HGNC Symbol;Acc:HGNC:9064]	no	no	no	no
chr3	ENSG00000154917	biallelic	biallelic			biallelic	biallelic	4	0	3	RAB6B	133824235	133895882	RAB6B, member RAS oncogene family [Source:HGNC Symbol;Acc:HGNC:14902]	no	no	no	no
chr3	ENSG00000154928	biallelic	biallelic	biallelic	biallelic	biallelic	biallelic	6	0	3	EPHB1	134795260	135260467	EPH receptor B1 [Source:HGNC Symbol;Acc:HGNC:3392]	no	no	no	no
chr3	ENSG00000156931	biallelic	biallelic			biallelic	biallelic	4	0	3	VPS8	184812143	185052614	VPS8 subunit of CORVET complex [Source:HGNC Symbol;Acc:HGNC:29122]	no	no	no	no
chr3	ENSG00000156959	biallelic	biallelic					2	0	3	LHFPL4	9498361	9553822	LHFPL tetraspan subfamily member 4 [Source:HGNC Symbol;Acc:HGNC:29568]	no	no	no	no
chr3	ENSG00000156983	biallelic	biallelic					2	0	3	BRPF1	9731729	9748019	bromodomain and PHD finger containing 1 [Source:HGNC Symbol;Acc:HGNC:14255]	no	no	no	no
chr3	ENSG00000156990	biallelic				biallelic	biallelic	3	0	3	RPUSD3	9837849	9844602	RNA pseudouridine synthase D3 [Source:HGNC Symbol;Acc:HGNC:28437]	no	no	no	no
chr3	ENSG00000157445	biallelic	biallelic	biallelic	biallelic		biallelic	5	0	3	CACNA2D3	54122547	55074557	calcium voltage-gated channel auxiliary subunit alpha2delta 3 [Source:HGNC Symbol;Acc:HGNC:15460]	no	no	no	no
chr3	ENSG00000157500	biallelic	biallelic	biallelic	biallelic			4	0	3	APPL1	57227726	57278105	adaptor protein, phosphotyrosine interacting with PH domain and leucine zipper 1 [Source:HGNC Symbol;Acc:HGNC:24035]	no	no	no	no
chr3	ENSG00000158220	biallelic	biallelic			biallelic	biallelic	4	0	3	ESYT3	138434586	138481686	extended synaptotagmin 3 [Source:HGNC Symbol;Acc:HGNC:24295]	no	no	no	no
chr3	ENSG00000160124	biallelic	biallelic					2	0	3	MIX23	122359591	122383231	mitochondrial matrix import factor 23 [Source:HGNC Symbol;Acc:HGNC:31136]	no	no	no	no
chr3	ENSG00000160145	biallelic	biallelic	biallelic	biallelic	biallelic		5	0	3	KALRN	124033369	124726325	kalirin RhoGEF kinase [Source:HGNC Symbol;Acc:HGNC:4814]	no	no	no	no
chr3	ENSG00000160796	biallelic	biallelic	biallelic	biallelic	biallelic	biallelic	6	0	3	NBEAL2	46979666	47009704	neurobeachin like 2 [Source:HGNC Symbol;Acc:HGNC:31928]	no	no	no	no
chr3	ENSG00000160799	biallelic	biallelic					2	0	3	CCDC12	46921726	46982010	coiled-coil domain containing 12 [Source:HGNC Symbol;Acc:HGNC:28332]	no	no	no	no
chr3	ENSG00000161203	biallelic	biallelic	biallelic	biallelic	biallelic	biallelic	6	0	3	AP2M1	184174689	184184214	adaptor related protein complex 2 subunit mu 1 [Source:HGNC Symbol;Acc:HGNC:564]	no	no	no	no
chr3	ENSG00000161204	biallelic	biallelic	biallelic	biallelic	biallelic		5	0	3	ABCF3	184186095	184194012	ATP binding cassette subfamily F member 3 [Source:HGNC Symbol;Acc:HGNC:72]	no	no	no	no
chr3	ENSG00000163377	biallelic	biallelic	biallelic	biallelic	biallelic	biallelic	6	0	3	TAFA4	68731766	68953297	TAFA chemokine like family member 4 [Source:HGNC Symbol;Acc:HGNC:21591]	no	no	no	no
chr3	ENSG00000163406	biallelic	biallelic			biallelic		3	0	3	SLC15A2	121894401	121944188	solute carrier family 15 member 2 [Source:HGNC Symbol;Acc:HGNC:10921]	no	no	no	no
chr3	ENSG00000163428	biallelic	biallelic					2	0	3	LRRC58	120324509	120349354	leucine rich repeat containing 58 [Source:HGNC Symbol;Acc:HGNC:26968]	no	no	no	no
chr3	ENSG00000163430	biallelic	biallelic					2	0	3	FSTL1	120392293	120450993	follistatin like 1 [Source:HGNC Symbol;Acc:HGNC:3972]	no	no	no	no
chr3	ENSG00000163507	biallelic	biallelic	biallelic	biallelic	biallelic	biallelic	6	0	3	CIP2A	108549864	108589644	cellular inhibitor of PP2A [Source:HGNC Symbol;Acc:HGNC:29302]	no	no	no	no
chr3	ENSG00000163520	biallelic	biallelic	biallelic	biallelic	biallelic	biallelic	6	0	3	FBLN2	13549125	13638422	fibulin 2 [Source:HGNC Symbol;Acc:HGNC:3601]	no	no	no	no
chr3	ENSG00000163528	biallelic	biallelic			biallelic	biallelic	4	0	3	CHCHD4	14112077	14124870	coiled-coil-helix-coiled-coil-helix domain containing 4 [Source:HGNC Symbol;Acc:HGNC:26467]	no	no	no	no
chr3	ENSG00000163605	biallelic	biallelic			biallelic	biallelic	4	0	3	PPP4R2	72996803	73069198	protein phosphatase 4 regulatory subunit 2 [Source:HGNC Symbol;Acc:HGNC:18296]	no	no	no	no
chr3	ENSG00000163611	biallelic	biallelic					2	0	3	SPICE1	113442718	113515187	spindle and centriole associated protein 1 [Source:HGNC Symbol;Acc:HGNC:25083]	no	no	no	no
chr3	ENSG00000163617	biallelic	biallelic					2	0	3	CCDC191	113964137	114056594	coiled-coil domain containing 191 [Source:HGNC Symbol;Acc:HGNC:29272]	no	no	no	no
chr3	ENSG00000163618	biallelic	biallelic					2	0	3	CADPS	62398346	62875416	calcium dependent secretion activator [Source:HGNC Symbol;Acc:HGNC:1426]	no	no	no	no
chr3	ENSG00000163635	biallelic	biallelic	biallelic	biallelic	biallelic	biallelic	6	0	3	ATXN7	63863155	64003462	ataxin 7 [Source:HGNC Symbol;Acc:HGNC:10560]	no	no	no	no
chr3	ENSG00000163636	biallelic	biallelic	biallelic	biallelic			4	0	3	PSMD6	64010550	64024010	proteasome 26S subunit, non-ATPase 6 [Source:HGNC Symbol;Acc:HGNC:9564]	no	no	no	no
chr3	ENSG00000163637	biallelic			biallelic		biallelic	3	0	3	PRICKLE2	64092236	64445476	prickle planar cell polarity protein 2 [Source:HGNC Symbol;Acc:HGNC:20340]	no	no	no	no
chr3	ENSG00000163660	biallelic	biallelic	biallelic	biallelic		biallelic	5	0	3	CCNL1	157146508	157160760	cyclin L1 [Source:HGNC Symbol;Acc:HGNC:20569]	no	no	no	no
chr3	ENSG00000163661	biallelic	biallelic	biallelic				3	0	3	PTX3	157436850	157443633	pentraxin 3 [Source:HGNC Symbol;Acc:HGNC:9692]	no	no	no	no
chr3	ENSG00000163666	biallelic	biallelic					2	0	3	HESX1	57197838	57227606	HESX homeobox 1 [Source:HGNC Symbol;Acc:HGNC:4877]	no	no	no	no
chr3	ENSG00000163689	biallelic	biallelic					2	0	3	CFAP20DC	58717365	59050084	CFAP20 domain containing [Source:HGNC Symbol;Acc:HGNC:24763]	no	no	no	no
chr3	ENSG00000163701	biallelic	biallelic	biallelic	biallelic	biallelic	biallelic	6	0	3	IL17RE	9902612	9916402	interleukin 17 receptor E [Source:HGNC Symbol;Acc:HGNC:18439]	no	no	no	no
chr3	ENSG00000163702	biallelic	biallelic	biallelic	biallelic	biallelic	biallelic	6	0	3	IL17RC	9917074	9933630	interleukin 17 receptor C [Source:HGNC Symbol;Acc:HGNC:18358]	no	no	no	no
chr3	ENSG00000163703	biallelic	biallelic			biallelic	biallelic	4	0	3	CRELD1	9933793	9945413	cysteine rich with EGF like domains 1 [Source:HGNC Symbol;Acc:HGNC:14630]	no	no	no	no
chr3	ENSG00000163704	biallelic	biallelic			biallelic	biallelic	4	0	3	PRRT3	9939450	9952408	proline rich transmembrane protein 3 [Source:HGNC Symbol;Acc:HGNC:26591]	no	no	no	no
chr3	ENSG00000163710	biallelic	biallelic	biallelic	biallelic	biallelic	biallelic	6	0	3	PCOLCE2	142815922	142889206	procollagen C-endopeptidase enhancer 2 [Source:HGNC Symbol;Acc:HGNC:8739]	no	no	no	no
chr3	ENSG00000163755	biallelic	biallelic	biallelic	biallelic	biallelic	biallelic	6	0	3	HPS3	149129638	149173732	HPS3 biogenesis of lysosomal organelles complex 2 subunit 1 [Source:HGNC Symbol;Acc:HGNC:15597]	no	no	no	no
chr3	ENSG00000163788	biallelic	biallelic					2	0	3	SNRK	43286512	43424764	SNF related kinase [Source:HGNC Symbol;Acc:HGNC:30598]	no	no	no	no
chr3	ENSG00000163808	biallelic	biallelic	biallelic	biallelic	biallelic	biallelic	6	0	3	KIF15	44761721	44873376	kinesin family member 15 [Source:HGNC Symbol;Acc:HGNC:17273]	no	no	no	no
chr3	ENSG00000163812	biallelic	biallelic			biallelic		3	0	3	ZDHHC3	44915257	44976185	zinc finger DHHC-type palmitoyltransferase 3 [Source:HGNC Symbol;Acc:HGNC:18470]	no	no	no	no
chr3	ENSG00000163814	biallelic	biallelic	biallelic	biallelic	biallelic	biallelic	6	0	3	CDCP1	45082277	45146422	CUB domain containing protein 1 [Source:HGNC Symbol;Acc:HGNC:24357]	no	no	no	no
chr3	ENSG00000163820	biallelic	biallelic			biallelic	biallelic	4	0	3	FYCO1	45917903	45995824	FYVE and coiled-coil domain autophagy adaptor 1 [Source:HGNC Symbol;Acc:HGNC:14673]	no	no	no	no
chr3	ENSG00000163827	biallelic	biallelic	biallelic	biallelic			4	0	3	LRRC2	46515385	46606948	leucine rich repeat containing 2 [Source:HGNC Symbol;Acc:HGNC:14676]	no	no	no	no
chr3	ENSG00000163840	biallelic	biallelic	biallelic	biallelic			4	0	3	DTX3L	122564338	122575203	deltex E3 ubiquitin ligase 3L [Source:HGNC Symbol;Acc:HGNC:30323]	no	no	no	no
chr3	ENSG00000163864	biallelic	biallelic					2	0	3	NMNAT3	139560180	139678017	nicotinamide nucleotide adenylyltransferase 3 [Source:HGNC Symbol;Acc:HGNC:20989]	no	no	no	no
chr3	ENSG00000163904	biallelic	biallelic			biallelic	biallelic	4	0	3	SENP2	185582496	185633551	SUMO specific peptidase 2 [Source:HGNC Symbol;Acc:HGNC:23116]	no	no	no	no
chr3	ENSG00000163913	biallelic	biallelic					2	0	3	IFT122	129429607	129520510	intraflagellar transport 122 [Source:HGNC Symbol;Acc:HGNC:13556]	no	no	no	no
chr3	ENSG00000163918	biallelic	biallelic	biallelic	biallelic		biallelic	5	0	3	RFC4	186789880	186807058	replication factor C subunit 4 [Source:HGNC Symbol;Acc:HGNC:9972]	no	no	no	no
chr3	ENSG00000163931	biallelic	biallelic	biallelic	biallelic	biallelic	biallelic	6	0	3	TKT	53224712	53256052	transketolase [Source:HGNC Symbol;Acc:HGNC:11834]	no	no	no	no
chr3	ENSG00000163932	biallelic	biallelic					2	0	3	PRKCD	53156009	53192717	protein kinase C delta [Source:HGNC Symbol;Acc:HGNC:9399]	no	no	no	no
chr3	ENSG00000163938	biallelic	biallelic	biallelic	biallelic			4	0	3	GNL3	52681156	52694497	G protein nucleolar 3 [Source:HGNC Symbol;Acc:HGNC:29931]	no	no	no	no
chr3	ENSG00000163939	biallelic	biallelic					2	0	3	PBRM1	52545352	52685917	polybromo 1 [Source:HGNC Symbol;Acc:HGNC:30064]	no	no	no	no
chr3	ENSG00000163946	biallelic	biallelic	biallelic	biallelic			4	0	3	TASOR	56620132	56683265	transcription activation suppressor [Source:HGNC Symbol;Acc:HGNC:30314]	no	no	no	no
chr3	ENSG00000163947	biallelic	biallelic	biallelic	biallelic			4	0	3	ARHGEF3	56727418	57079329	Rho guanine nucleotide exchange factor 3 [Source:HGNC Symbol;Acc:HGNC:683]	no	no	no	no
chr3	ENSG00000163958	biallelic						1	0	3	ZDHHC19	196197452	196211437	zinc finger DHHC-type palmitoyltransferase 19 [Source:HGNC Symbol;Acc:HGNC:20713]	no	no	no	no
chr3	ENSG00000163959	biallelic	biallelic	biallelic	biallelic	biallelic	biallelic	6	0	3	SLC51A	196211487	196243178	solute carrier family 51 subunit alpha [Source:HGNC Symbol;Acc:HGNC:29955]	no	no	no	no
chr3	ENSG00000163961	biallelic	biallelic	biallelic	biallelic	biallelic	biallelic	6	0	3	RNF168	196468783	196503768	ring finger protein 168 [Source:HGNC Symbol;Acc:HGNC:26661]	no	no	no	no
chr3	ENSG00000163964	biallelic						1	0	3	PIGX	196639775	196736007	phosphatidylinositol glycan anchor biosynthesis class X [Source:HGNC Symbol;Acc:HGNC:26046]	no	no	no	no
chr3	ENSG00000164050	biallelic	biallelic	biallelic	biallelic			4	0	3	PLXNB1	48403854	48430086	plexin B1 [Source:HGNC Symbol;Acc:HGNC:9103]	no	no	no	no
chr3	ENSG00000164051	biallelic	biallelic	biallelic	biallelic			4	0	3	CCDC51	48432164	48440456	coiled-coil domain containing 51 [Source:HGNC Symbol;Acc:HGNC:25714]	no	no	no	no
chr3	ENSG00000164053	biallelic	biallelic			biallelic	biallelic	4	0	3	ATRIP	48446710	48467645	ATR interacting protein [Source:HGNC Symbol;Acc:HGNC:33499]	no	no	no	no
chr3	ENSG00000164076	biallelic	biallelic			biallelic	biallelic	4	0	3	CAMKV	49857988	49869935	CaM kinase like vesicle associated [Source:HGNC Symbol;Acc:HGNC:28788]	no	no	no	no
chr3	ENSG00000164077	biallelic	biallelic	biallelic	biallelic	biallelic	biallelic	6	0	3	MON1A	49907160	49930173	MON1 homolog A, secretory trafficking associated [Source:HGNC Symbol;Acc:HGNC:28207]	no	no	no	no
chr3	ENSG00000164078	biallelic	biallelic	biallelic	biallelic	biallelic	biallelic	6	0	3	MST1R	49887002	49903873	macrophage stimulating 1 receptor [Source:HGNC Symbol;Acc:HGNC:7381]	no	no	no	no
chr3	ENSG00000168016	biallelic	biallelic	biallelic	biallelic	biallelic	biallelic	6	0	3	TRANK1	36826819	36945057	tetratricopeptide repeat and ankyrin repeat containing 1 [Source:HGNC Symbol;Acc:HGNC:29011]	no	no	no	no
chr3	ENSG00000168028	biallelic	biallelic	biallelic	biallelic	biallelic	biallelic	6	0	3	RPSA	39406716	39426255	ribosomal protein SA [Source:HGNC Symbol;Acc:HGNC:6502]	no	no	no	no
chr3	ENSG00000168038	biallelic	biallelic					2	0	3	ULK4	41246599	41962130	unc-51 like kinase 4 [Source:HGNC Symbol;Acc:HGNC:15784]	no	no	no	no
chr3	ENSG00000168137	biallelic	biallelic	biallelic	biallelic			4	0	3	SETD5	9397615	9479240	SET domain containing 5 [Source:HGNC Symbol;Acc:HGNC:25566]	no	no	no	no
chr3	ENSG00000168268	biallelic	biallelic	biallelic	biallelic			4	0	3	NT5DC2	52524385	52535054	5'-nucleotidase domain containing 2 [Source:HGNC Symbol;Acc:HGNC:25717]	no	no	no	no
chr3	ENSG00000168291	biallelic	biallelic	biallelic	biallelic	biallelic	biallelic	6	0	3	PDHB	58427630	58433857	pyruvate dehydrogenase E1 subunit beta [Source:HGNC Symbol;Acc:HGNC:8808]	no	no	no	no
chr3	ENSG00000168297	biallelic	biallelic					2	0	3	PXK	58332880	58426127	PX domain containing serine/threonine kinase like [Source:HGNC Symbol;Acc:HGNC:23326]	no	no	no	no
chr3	ENSG00000168306	biallelic	biallelic					2	0	3	ACOX2	58505136	58537283	acyl-CoA oxidase 2 [Source:HGNC Symbol;Acc:HGNC:120]	no	no	no	no
chr3	ENSG00000168827	biallelic	biallelic	biallelic	biallelic	biallelic	biallelic	6	0	3	GFM1	158644527	158695581	G elongation factor mitochondrial 1 [Source:HGNC Symbol;Acc:HGNC:13780]	no	no	no	no
chr3	ENSG00000169064	biallelic	biallelic		biallelic	biallelic		4	0	3	ZBBX	167239843	167407874	zinc finger B-box domain containing [Source:HGNC Symbol;Acc:HGNC:26245]	no	no	no	no
chr3	ENSG00000169251	biallelic	biallelic					2	0	3	NMD3	161104696	161253532	NMD3 ribosome export adaptor [Source:HGNC Symbol;Acc:HGNC:24250]	no	no	no	no
chr3	ENSG00000169760	biallelic		biallelic	biallelic	biallelic	biallelic	5	0	3	NLGN1	173396284	174294372	neuroligin 1 [Source:HGNC Symbol;Acc:HGNC:14291]	no	no	no	no
chr3	ENSG00000169814	biallelic	biallelic	biallelic	biallelic	biallelic	biallelic	6	0	3	BTD	15601341	15722311	biotinidase [Source:HGNC Symbol;Acc:HGNC:1122]	no	no	no	no
chr3	ENSG00000169855	biallelic	biallelic	biallelic	biallelic	biallelic	biallelic	6	0	3	ROBO1	78597239	79767998	roundabout guidance receptor 1 [Source:HGNC Symbol;Acc:HGNC:10249]	no	no	no	no
chr3	ENSG00000169860	biallelic	biallelic					2	0	3	P2RY1	152835131	152841439	purinergic receptor P2Y1 [Source:HGNC Symbol;Acc:HGNC:8539]	no	no	no	no
chr3	ENSG00000170017	biallelic	biallelic	biallelic	biallelic	biallelic	biallelic	6	0	3	ALCAM	105366909	105576900	activated leukocyte cell adhesion molecule [Source:HGNC Symbol;Acc:HGNC:400]	no	no	no	no
chr3	ENSG00000170248	biallelic	biallelic	biallelic	biallelic	biallelic	biallelic	6	0	3	PDCD6IP	33798571	33869707	programmed cell death 6 interacting protein [Source:HGNC Symbol;Acc:HGNC:8766]	no	no	no	no
chr3	ENSG00000170364	biallelic						1	0	3	SETMAR	4303332	4317265	SET domain and mariner transposase fusion gene [Source:HGNC Symbol;Acc:HGNC:10762]	no	no	no	no
chr3	ENSG00000170876	biallelic	biallelic					2	0	3	TMEM43	14125015	14143680	transmembrane protein 43 [Source:HGNC Symbol;Acc:HGNC:28472]	no	no	no	no
chr3	ENSG00000171121	biallelic		biallelic	biallelic			3	0	3	KCNMB3	179236691	179267002	potassium calcium-activated channel subfamily M regulatory beta subunit 3 [Source:HGNC Symbol;Acc:HGNC:6287]	no	no	no	no
chr3	ENSG00000171135	biallelic	biallelic	biallelic	biallelic	biallelic	biallelic	6	0	3	JAGN1	9890574	9894349	jagunal homolog 1 [Source:HGNC Symbol;Acc:HGNC:26926]	no	no	no	no
chr3	ENSG00000171148	biallelic	biallelic	biallelic	biallelic	biallelic	biallelic	6	0	3	TADA3	9779967	9793011	transcriptional adaptor 3 [Source:HGNC Symbol;Acc:HGNC:19422]	no	no	no	no
chr3	ENSG00000172020	biallelic	biallelic					2	0	3	GAP43	115623510	115721490	growth associated protein 43 [Source:HGNC Symbol;Acc:HGNC:4140]	no	no	no	no
chr3	ENSG00000172037	biallelic	biallelic	biallelic	biallelic	biallelic	biallelic	6	0	3	LAMB2	49121114	49133118	laminin subunit beta 2 [Source:HGNC Symbol;Acc:HGNC:6487]	no	no	no	no
chr3	ENSG00000172765	biallelic						1	0	3	TMCC1	129647792	129893711	transmembrane and coiled-coil domain family 1 [Source:HGNC Symbol;Acc:HGNC:29116]	no	no	no	no
chr3	ENSG00000172986	biallelic				biallelic	biallelic	3	0	3	GXYLT2	72888046	72998138	glucoside xylosyltransferase 2 [Source:HGNC Symbol;Acc:HGNC:33383]	no	no	no	no
chr3	ENSG00000173226	biallelic	biallelic					2	0	3	IQCB1	121769761	121835079	IQ motif containing B1 [Source:HGNC Symbol;Acc:HGNC:28949]	no	no	no	no
chr3	ENSG00000173905	biallelic	biallelic					2	0	3	GOLIM4	168008689	168095924	golgi integral membrane protein 4 [Source:HGNC Symbol;Acc:HGNC:15448]	no	no	no	no
chr3	ENSG00000173950	biallelic		biallelic	biallelic			3	0	3	XXYLT1	195068284	195271159	xyloside xylosyltransferase 1 [Source:HGNC Symbol;Acc:HGNC:26639]	no	no	no	no
chr3	ENSG00000174004	biallelic	biallelic					2	0	3	NRROS	196639694	196662004	negative regulator of reactive oxygen species [Source:HGNC Symbol;Acc:HGNC:24613]	no	no	no	no
chr3	ENSG00000174928	biallelic	biallelic					2	0	3	C3orf33	155762617	155806278	chromosome 3 open reading frame 33 [Source:HGNC Symbol;Acc:HGNC:26434]	no	no	no	no
chr3	ENSG00000174953	biallelic	biallelic			biallelic	biallelic	4	0	3	DHX36	154272546	154324487	DEAH-box helicase 36 [Source:HGNC Symbol;Acc:HGNC:14410]	no	no	no	no
chr3	ENSG00000175054	biallelic	biallelic	biallelic	biallelic	biallelic	biallelic	6	0	3	ATR	142449007	142578733	ATR serine/threonine kinase [Source:HGNC Symbol;Acc:HGNC:882]	no	no	no	no
chr3	ENSG00000175161	biallelic	biallelic					2	0	3	CADM2	84958989	86074429	cell adhesion molecule 2 [Source:HGNC Symbol;Acc:HGNC:29849]	no	no	no	no
chr3	ENSG00000175455	biallelic	biallelic	biallelic	biallelic	biallelic	biallelic	6	0	3	CCDC14	123897305	123961408	coiled-coil domain containing 14 [Source:HGNC Symbol;Acc:HGNC:25766]	no	no	no	no
chr3	ENSG00000175792	biallelic	biallelic					2	0	3	RUVBL1	128064778	128153914	RuvB like AAA ATPase 1 [Source:HGNC Symbol;Acc:HGNC:10474]	no	no	no	no
chr3	ENSG00000176542	biallelic	biallelic	biallelic	biallelic	biallelic	biallelic	6	0	3	USF3	113648385	113696646	upstream transcription factor family member 3 [Source:HGNC Symbol;Acc:HGNC:30494]	no	no	no	no
chr3	ENSG00000177646	biallelic	biallelic					2	0	3	ACAD9	128879596	128924003	acyl-CoA dehydrogenase family member 9 [Source:HGNC Symbol;Acc:HGNC:21497]	no	no	no	no
chr3	ENSG00000178038	biallelic	biallelic	biallelic	biallelic	biallelic	biallelic	6	0	3	ALS2CL	46668995	46693704	ALS2 C-terminal like [Source:HGNC Symbol;Acc:HGNC:20605]	no	no	no	no
chr3	ENSG00000178053	biallelic	biallelic	biallelic	biallelic	biallelic	biallelic	6	0	3	MLF1	158571163	158607252	myeloid leukemia factor 1 [Source:HGNC Symbol;Acc:HGNC:7125]	no	no	no	no
chr3	ENSG00000179152	biallelic	biallelic					2	0	3	TCAIM	44338119	44409451	T cell activation inhibitor, mitochondrial [Source:HGNC Symbol;Acc:HGNC:25241]	no	no	no	no
chr3	ENSG00000179796	biallelic	biallelic					2	0	3	LRRC3B	26622772	26717537	leucine rich repeat containing 3B [Source:HGNC Symbol;Acc:HGNC:28105]	no	no	no	no
chr3	ENSG00000180353	biallelic	biallelic					2	0	3	HCLS1	121631399	121660927	hematopoietic cell-specific Lyn substrate 1 [Source:HGNC Symbol;Acc:HGNC:4844]	no	no	no	no
chr3	ENSG00000180376	biallelic	biallelic	biallelic	biallelic			4	0	3	CCDC66	56557161	56621837	coiled-coil domain containing 66 [Source:HGNC Symbol;Acc:HGNC:27709]	no	no	no	no
chr3	ENSG00000180385	biallelic	biallelic			biallelic	biallelic	4	0	3	EMC3-AS1	9987904	9994331	EMC3 antisense RNA 1 [Source:HGNC Symbol;Acc:HGNC:49223]	no	no	no	no
chr3	ENSG00000181458	biallelic	biallelic	biallelic	biallelic			4	0	3	TMEM45A	100492619	100577444	transmembrane protein 45A [Source:HGNC Symbol;Acc:HGNC:25480]	no	no	no	no
chr3	ENSG00000181744	biallelic	biallelic			biallelic	biallelic	4	0	3	DIPK2A	143971823	144048719	divergent protein kinase domain 2A [Source:HGNC Symbol;Acc:HGNC:28490]	no	no	no	no
chr3	ENSG00000181788	biallelic	biallelic					2	0	3	SIAH2	150741125	150763477	siah E3 ubiquitin protein ligase 2 [Source:HGNC Symbol;Acc:HGNC:10858]	no	no	no	no
chr3	ENSG00000181789	biallelic	biallelic					2	0	3	COPG1	129249606	129277773	COPI coat complex subunit gamma 1 [Source:HGNC Symbol;Acc:HGNC:2236]	no	no	no	no
chr3	ENSG00000182504	biallelic	biallelic			biallelic	biallelic	4	0	3	CEP97	101724534	101770562	centrosomal protein 97 [Source:HGNC Symbol;Acc:HGNC:26244]	no	no	no	no
chr3	ENSG00000182568	biallelic	biallelic					2	0	3	SATB1	18345377	18445621	SATB homeobox 1 [Source:HGNC Symbol;Acc:HGNC:10541]	no	no	no	no
chr3	ENSG00000182606	biallelic	biallelic	biallelic	biallelic	biallelic	biallelic	6	0	3	TRAK1	42013802	42225890	trafficking kinesin protein 1 [Source:HGNC Symbol;Acc:HGNC:29947]	no	no	no	no
chr3	ENSG00000182899	biallelic	biallelic					2	0	3	RPL35A	197950190	197956610	ribosomal protein L35a [Source:HGNC Symbol;Acc:HGNC:10345]	no	no	no	no
chr3	ENSG00000182983	biallelic	biallelic		biallelic			3	0	3	ZNF662	42906142	42919334	zinc finger protein 662 [Source:HGNC Symbol;Acc:HGNC:31930]	no	no	no	no
chr3	ENSG00000183873	biallelic	biallelic	biallelic	biallelic	biallelic	biallelic	6	0	3	SCN5A	38548057	38649687	sodium voltage-gated channel alpha subunit 5 [Source:HGNC Symbol;Acc:HGNC:10593]	no	no	no	no
chr3	ENSG00000184220	biallelic	biallelic	biallelic	biallelic			4	0	3	CMSS1	99817837	100181732	cms1 ribosomal small subunit homolog [Source:HGNC Symbol;Acc:HGNC:28666]	no	no	no	no
chr3	ENSG00000184500	biallelic	biallelic			biallelic	biallelic	4	0	3	PROS1	93873051	93980003	protein S [Source:HGNC Symbol;Acc:HGNC:9456]	no	no	no	no
chr3	ENSG00000185112	biallelic	biallelic			biallelic	biallelic	4	0	3	FAM43A	194685883	194689037	family with sequence similarity 43 member A [Source:HGNC Symbol;Acc:HGNC:26888]	no	no	no	no
chr3	ENSG00000185565	biallelic	biallelic					2	0	3	LSAMP	115802363	117139389	limbic system associated membrane protein [Source:HGNC Symbol;Acc:HGNC:6705]	no	no	no	no
chr3	ENSG00000185621	biallelic	biallelic			biallelic	biallelic	4	0	3	LMLN	197960200	198043720	leishmanolysin like peptidase [Source:HGNC Symbol;Acc:HGNC:15991]	no	no	no	no
chr3	ENSG00000185798	biallelic	biallelic			biallelic	biallelic	4	0	3	WDR53	196554177	196568674	WD repeat domain 53 [Source:HGNC Symbol;Acc:HGNC:28786]	no	no	no	no
chr3	ENSG00000186001	biallelic	biallelic			biallelic	biallelic	4	0	3	LRCH3	197791226	197888436	leucine rich repeats and calponin homology domain containing 3 [Source:HGNC Symbol;Acc:HGNC:28637]	no	no	no	no
chr3	ENSG00000186432	biallelic	biallelic			biallelic	biallelic	4	0	3	KPNA4	160495007	160565571	karyopherin subunit alpha 4 [Source:HGNC Symbol;Acc:HGNC:6397]	no	no	no	no
chr3	ENSG00000187091	biallelic	biallelic					2	0	3	PLCD1	38007496	38029642	phospholipase C delta 1 [Source:HGNC Symbol;Acc:HGNC:9060]	no	no	no	no
chr3	ENSG00000187672	biallelic	biallelic					2	0	3	ERC2	55508311	56469095	ELKS/RAB6-interacting/CAST family member 2 [Source:HGNC Symbol;Acc:HGNC:31922]	no	no	no	no
chr3	ENSG00000188338	biallelic						1	0	3	SLC38A3	50205246	50221486	solute carrier family 38 member 3 [Source:HGNC Symbol;Acc:HGNC:18044]	no	no	no	no
chr3	ENSG00000188846	biallelic						1	0	3	RPL14	40457292	40468587	ribosomal protein L14 [Source:HGNC Symbol;Acc:HGNC:10305]	no	no	no	no
chr3	ENSG00000189366	biallelic	biallelic					2	0	3	ALG1L1P	125929272	125990537	ALG1 like 1, pseudogene [Source:HGNC Symbol;Acc:HGNC:33721]	no	no	no	no
chr3	ENSG00000196220	biallelic	biallelic					2	0	3	SRGAP3	8980591	9363053	SLIT-ROBO Rho GTPase activating protein 3 [Source:HGNC Symbol;Acc:HGNC:19744]	no	no	no	no
chr3	ENSG00000196345	biallelic	biallelic	biallelic	biallelic	biallelic	biallelic	6	0	3	ZKSCAN7	44555193	44594173	zinc finger with KRAB and SCAN domains 7 [Source:HGNC Symbol;Acc:HGNC:12955]	no	no	no	no
chr3	ENSG00000196428	biallelic	biallelic			biallelic	biallelic	4	0	3	TSC22D2	150408298	150466422	TSC22 domain family member 2 [Source:HGNC Symbol;Acc:HGNC:29095]	no	no	no	no
chr3	ENSG00000196455	biallelic	biallelic					2	0	3	PIK3R4	130678934	130746829	phosphoinositide-3-kinase regulatory subunit 4 [Source:HGNC Symbol;Acc:HGNC:8982]	no	no	no	no
chr3	ENSG00000196653	biallelic	biallelic	biallelic	biallelic	biallelic	biallelic	6	0	3	ZNF502	44712643	44723831	zinc finger protein 502 [Source:HGNC Symbol;Acc:HGNC:23718]	no	no	no	no
chr3	ENSG00000197763	biallelic	biallelic					2	0	3	TXNRD3	126571779	126655124	thioredoxin reductase 3 [Source:HGNC Symbol;Acc:HGNC:20667]	no	no	no	no
chr3	ENSG00000197885	biallelic	biallelic			biallelic	biallelic	4	0	3	NKIRAS1	23889951	23946591	NFKB inhibitor interacting Ras like 1 [Source:HGNC Symbol;Acc:HGNC:17899]	no	no	no	no
chr3	ENSG00000198585	biallelic	biallelic					2	0	3	NUDT16	131381671	131388830	nudix hydrolase 16 [Source:HGNC Symbol;Acc:HGNC:26442]	no	no	no	no
chr3	ENSG00000206262	biallelic						1	0	3	FOXL2NB	138947217	138953990	FOXL2 neighbor [Source:HGNC Symbol;Acc:HGNC:34428]	no	no	no	no
chr3	ENSG00000206535	biallelic	biallelic	biallelic	biallelic			4	0	3	LNP1	100401532	100456319	leukemia NUP98 fusion partner 1 [Source:HGNC Symbol;Acc:HGNC:28014]	no	no	no	no
chr3	ENSG00000206560	biallelic	biallelic	biallelic	biallelic	biallelic	biallelic	6	0	3	ANKRD28	15667236	15859771	ankyrin repeat domain 28 [Source:HGNC Symbol;Acc:HGNC:29024]	no	no	no	no
chr3	ENSG00000206561	biallelic						1	0	3	COLQ	15450133	15521751	collagen like tail subunit of asymmetric acetylcholinesterase [Source:HGNC Symbol;Acc:HGNC:2226]	no	no	no	no
chr3	ENSG00000211456	biallelic	biallelic	biallelic	biallelic	biallelic		5	0	3	SACM1L	45689056	45745412	SAC1 like phosphatidylinositide phosphatase [Source:HGNC Symbol;Acc:HGNC:17059]	no	no	no	no
chr3	ENSG00000213186	biallelic	biallelic					2	0	3	TRIM59	160432445	160485773	tripartite motif containing 59 [Source:HGNC Symbol;Acc:HGNC:30834]	no	no	no	no
chr3	ENSG00000213533	biallelic	biallelic	biallelic	biallelic	biallelic	biallelic	6	0	3	STIMATE	52836219	52897548	STIM activating enhancer [Source:HGNC Symbol;Acc:HGNC:30526]	no	no	no	no
chr3	ENSG00000214021	biallelic	biallelic	biallelic	biallelic	biallelic	biallelic	6	0	3	TTLL3	9808086	9855138	tubulin tyrosine ligase like 3 [Source:HGNC Symbol;Acc:HGNC:24483]	no	no	no	no
chr3	ENSG00000214135	biallelic	biallelic			biallelic	biallelic	4	0	3	SDHAP4	197619740	197627848	SDHA pseudogene 4 [Source:HGNC Symbol;Acc:HGNC:55782]	no	no	no	no
chr3	ENSG00000230530	biallelic	biallelic	biallelic	biallelic			4	0	3	LIMD1-AS1	45676369	45689200	LIMD1 antisense RNA 1 [Source:HGNC Symbol;Acc:HGNC:44107]	no	no	no	no
chr3	ENSG00000231305	biallelic						1	0	3		128860620	128871540	novel transcript	no	no	no	no
chr3	ENSG00000240429	biallelic	biallelic					2	0	3	LRRFIP1P1	179259028	179261273	LRR binding FLII interacting protein 1 pseudogene 1 [Source:HGNC Symbol;Acc:HGNC:32937]	no	no	no	no
chr3	ENSG00000241186	biallelic	biallelic	biallelic	biallelic			4	0	3	TDGF1	46574534	46582457	teratocarcinoma-derived growth factor 1 [Source:HGNC Symbol;Acc:HGNC:11701]	no	no	no	no
chr3	ENSG00000242086	biallelic		biallelic		biallelic		3	0	3	MUC20-OT1	195658062	195739964	MUC20 overlapping transcript [Source:HGNC Symbol;Acc:HGNC:53807]	no	no	no	no
chr3	ENSG00000242242	biallelic	biallelic					2	0	3	NECTIN3-AS1	110888384	111071553	NECTIN3 antisense RNA 1 [Source:HGNC Symbol;Acc:HGNC:40813]	no	no	no	no
chr3	ENSG00000244026	biallelic	biallelic	biallelic	biallelic	biallelic		5	0	3	FAM86DP	75422961	75435110	family with sequence similarity 86 member D, pseudogene [Source:HGNC Symbol;Acc:HGNC:32659]	no	no	no	no
chr3	ENSG00000244405	biallelic						1	0	3	ETV5	186046314	186110318	ETS variant transcription factor 5 [Source:HGNC Symbol;Acc:HGNC:3494]	no	no	no	no
chr3	ENSG00000251474	biallelic	biallelic					2	0	3	RPL32P3	129396218	129397109	ribosomal protein L32 pseudogene 3 [Source:HGNC Symbol;Acc:HGNC:27024]	no	no	no	no
chr3	ENSG00000255423	biallelic	biallelic			biallelic	biallelic	4	0	3	EBLN2	73061659	73063337	endogenous Bornavirus like nucleoprotein 2 [Source:HGNC Symbol;Acc:HGNC:25493]	no	no	no	no
chr3	ENSG00000263826	biallelic	biallelic	biallelic	biallelic			4	0	3		186781780	186784179	novel transcript, antisense to eukaryotic translation initiation factor 4A, isoform 2 EIF4A2	no	no	no	no
chr3	ENSG00000270170	biallelic	biallelic			biallelic	biallelic	4	0	3	NCBP2AS2	196942674	196943543	NCBP2 antisense 2 (head to head) [Source:HGNC Symbol;Acc:HGNC:25121]	no	no	no	no
chr3	ENSG00000275227	biallelic						1	0	3		25618132	25618312		no	no	no	no
chr4	ENSG00000002549	biallelic	biallelic					2	0	4	LAP3	17577198	17607972	leucine aminopeptidase 3 [Source:HGNC Symbol;Acc:HGNC:18449]	no	no	no	no
chr4	ENSG00000002587	biallelic						1	0	4	HS3ST1	11393150	11429564	heparan sulfate-glucosamine 3-sulfotransferase 1 [Source:HGNC Symbol;Acc:HGNC:5194]	no	no	no	no
chr4	ENSG00000005059	biallelic	biallelic	biallelic	biallelic	biallelic	biallelic	6	0	4	MCUB	109560209	109688719	mitochondrial calcium uniporter dominant negative subunit beta [Source:HGNC Symbol;Acc:HGNC:26076]	no	no	no	no
chr4	ENSG00000013288	biallelic	biallelic			biallelic	biallelic	4	0	4	MAN2B2	6575189	6623362	mannosidase alpha class 2B member 2 [Source:HGNC Symbol;Acc:HGNC:29623]	no	no	no	no
chr4	ENSG00000013810	biallelic	biallelic	biallelic	biallelic			4	0	4	TACC3	1712858	1745171	transforming acidic coiled-coil containing protein 3 [Source:HGNC Symbol;Acc:HGNC:11524]	no	no	no	no
chr4	ENSG00000014824	biallelic	biallelic					2	0	4	SLC30A9	41990502	42090461	solute carrier family 30 member 9 [Source:HGNC Symbol;Acc:HGNC:1329]	no	no	no	no
chr4	ENSG00000018189	biallelic	biallelic					2	0	4	RUFY3	70704204	70808619	RUN and FYVE domain containing 3 [Source:HGNC Symbol;Acc:HGNC:30285]	no	no	no	no
chr4	ENSG00000035928	biallelic	biallelic	biallelic	biallelic	biallelic	biallelic	6	0	4	RFC1	39287456	39366375	replication factor C subunit 1 [Source:HGNC Symbol;Acc:HGNC:9969]	no	no	no	no
chr4	ENSG00000038002	biallelic	biallelic				biallelic	3	0	4	AGA	177430774	177442437	aspartylglucosaminidase [Source:HGNC Symbol;Acc:HGNC:318]	no	no	no	no
chr4	ENSG00000047662	biallelic	biallelic					2	0	4	FAM184B	17629306	17781621	family with sequence similarity 184 member B [Source:HGNC Symbol;Acc:HGNC:29235]	no	no	no	no
chr4	ENSG00000053900	biallelic	biallelic			biallelic	biallelic	4	0	4	ANAPC4	25377263	25418498	anaphase promoting complex subunit 4 [Source:HGNC Symbol;Acc:HGNC:19990]	no	no	no	no
chr4	ENSG00000056050	biallelic	biallelic	biallelic	biallelic			4	0	4	HPF1	169729470	169757944	histone PARylation factor 1 [Source:HGNC Symbol;Acc:HGNC:26051]	no	no	no	no
chr4	ENSG00000059691	biallelic	biallelic					2	0	4	GATB	151670504	151761007	glutamyl-tRNA amidotransferase subunit B [Source:HGNC Symbol;Acc:HGNC:8849]	no	no	no	no
chr4	ENSG00000064042	biallelic	biallelic	biallelic	biallelic	biallelic	biallelic	6	0	4	LIMCH1	41359607	41700044	LIM and calponin homology domains 1 [Source:HGNC Symbol;Acc:HGNC:29191]	no	no	no	no
chr4	ENSG00000065882	biallelic	biallelic	biallelic	biallelic	biallelic	biallelic	6	0	4	TBC1D1	37891084	38139175	TBC1 domain family member 1 [Source:HGNC Symbol;Acc:HGNC:11578]	no	no	no	no
chr4	ENSG00000072832	biallelic	biallelic	biallelic	biallelic			4	0	4	CRMP1	5748084	5893086	collapsin response mediator protein 1 [Source:HGNC Symbol;Acc:HGNC:2365]	no	no	no	no
chr4	ENSG00000072840	biallelic	biallelic	biallelic	biallelic	biallelic	biallelic	6	0	4	EVC	5711201	5814305	EvC ciliary complex subunit 1 [Source:HGNC Symbol;Acc:HGNC:3497]	no	no	no	no
chr4	ENSG00000074211	biallelic	biallelic			biallelic	biallelic	4	0	4	PPP2R2C	6320578	6563600	protein phosphatase 2 regulatory subunit Bgamma [Source:HGNC Symbol;Acc:HGNC:9306]	no	no	no	no
[truncated: 7,545 more rows]

## Sheet: NSC_mono_bi_shared
Supplemental Data S2: List of mono and biallelic SNPs assigned to 47,XYY NSCs
chrom	GeneID	NSC.JS1_B_PS.47XYY	NSC.JS2_B_PS.47XYY	NSC.JS2_C_PS.47XYY	NSC.JS3C_PS.47XYY	NSC.JS3_C_PS.47XYY	Total_bi	Total_mono	chromosome_name	hgnc_symbol	start_position	end_position	description	isPAR	escape_Tukianien	variable_Tukianien	inactive_Tukianien
chr9	ENSG00000196205	monoallelic	monoallelic	monoallelic	monoallelic	monoallelic	0	5	9	EEF1A1P5	133019486	133020874	eukaryotic translation elongation factor 1 alpha 1 pseudogene 5 [Source:HGNC Symbol;Acc:HGNC:3200]	no	no	no	no
chr14	ENSG00000214548	monoallelic	monoallelic	monoallelic	monoallelic	monoallelic	0	5	14	MEG3	100779410	100861031	maternally expressed 3 [Source:HGNC Symbol;Acc:HGNC:14575]	no	no	no	no
chr15	ENSG00000224078	monoallelic	monoallelic	monoallelic	monoallelic	monoallelic	0	5	15	SNHG14	24978583	25420336	small nucleolar RNA host gene 14 [Source:HGNC Symbol;Acc:HGNC:37462]	no	no	no	no
chr17	ENSG00000034152	monoallelic	monoallelic	monoallelic	monoallelic	monoallelic	0	5	17	MAP2K3	21284672	21315232	mitogen-activated protein kinase kinase 3 [Source:HGNC Symbol;Acc:HGNC:6843]	no	no	no	no
chr19	ENSG00000232677	monoallelic	monoallelic	monoallelic	monoallelic	monoallelic	0	5	19	LINC00665	36259540	36331770	long intergenic non-protein coding RNA 665 [Source:HGNC Symbol;Acc:HGNC:44323]	no	no	no	no
chr21	ENSG00000198618	monoallelic	monoallelic	monoallelic	monoallelic	monoallelic	0	5	21	PPIAP22	18857779	18858276	peptidylprolyl isomerase A pseudogene 22 [Source:HGNC Symbol;Acc:HGNC:17236]	no	no	no	no
chrX	ENSG00000168939	monoallelic	monoallelic	monoallelic	monoallelic	monoallelic	0	5	X	SPRY3	155612572	155782459	sprouty RTK signaling antagonist 3 [Source:HGNC Symbol;Acc:HGNC:11271]	no	no	no	yes
chr1	ENSG00000143702	biallelic	monoallelic	monoallelic	monoallelic	monoallelic	1	4	1	CEP170	243124428	243255348	centrosomal protein 170 [Source:HGNC Symbol;Acc:HGNC:28920]	no	no	no	no
chr7	ENSG00000184863	monoallelic		monoallelic	monoallelic	monoallelic	0	4	7	RBM33	155644451	155781485	RNA binding motif protein 33 [Source:HGNC Symbol;Acc:HGNC:27223]	no	no	no	no
chr11	ENSG00000269821	monoallelic	monoallelic	biallelic	monoallelic	monoallelic	1	4	11	KCNQ1OT1	2608328	2699994	KCNQ1 opposite strand/antisense transcript 1 [Source:HGNC Symbol;Acc:HGNC:6295]	no	no	no	no
chr15	ENSG00000180229	monoallelic		monoallelic	monoallelic	monoallelic	0	4	15	HERC2P3	20431093	20505462	HERC2 pseudogene 3 [Source:HGNC Symbol;Acc:HGNC:4871]	no	no	no	no
chr17	ENSG00000170291	biallelic	monoallelic	monoallelic	monoallelic	monoallelic	1	4	17	ELP5	7251416	7259940	elongator acetyltransferase complex subunit 5 [Source:HGNC Symbol;Acc:HGNC:30617]	no	no	no	no
chr6	ENSG00000029363		monoallelic	monoallelic	monoallelic	monoallelic	0	4	6	BCLAF1	136256627	136289851	BCL2 associated transcription factor 1 [Source:HGNC Symbol;Acc:HGNC:16863]	no	no	no	no
chr12	ENSG00000179899		monoallelic	monoallelic	monoallelic	monoallelic	0	4	12	PHC1P1	55411727	55414787	polyhomeotic homolog 1 pseudogene 1 [Source:HGNC Symbol;Acc:HGNC:34502]	no	no	no	no
chr15	ENSG00000128739		monoallelic	monoallelic	monoallelic	monoallelic	0	4	15	SNRPN	24823637	24978723	small nuclear ribonucleoprotein polypeptide N [Source:HGNC Symbol;Acc:HGNC:11164]	no	no	no	no
chr15	ENSG00000254585		monoallelic	monoallelic	monoallelic	monoallelic	0	4	15	MAGEL2	23643549	23647867	MAGE family member L2 [Source:HGNC Symbol;Acc:HGNC:6814]	no	no	no	no
chr1	ENSG00000265808	monoallelic	monoallelic	monoallelic			0	3	1	SEC22B	120150898	120176520	SEC22 homolog B, vesicle trafficking protein [Source:HGNC Symbol;Acc:HGNC:10700]	no	no	no	no
chr2	ENSG00000204186	monoallelic			monoallelic	monoallelic	0	3	2	ZDBF2	206274663	206314427	zinc finger DBF-type containing 2 [Source:HGNC Symbol;Acc:HGNC:29313]	no	no	no	no
chr4	ENSG00000243449	monoallelic	monoallelic		monoallelic		0	3	4	C4orf48	2041995	2043964	chromosome 4 open reading frame 48 [Source:HGNC Symbol;Acc:HGNC:34437]	no	no	no	no
chr5	ENSG00000081818	monoallelic	monoallelic	monoallelic	biallelic	biallelic	2	3	5	PCDHB4	141121818	141125623	protocadherin beta 4 [Source:HGNC Symbol;Acc:HGNC:8689]	no	no	no	no
chr5	ENSG00000145919	monoallelic			monoallelic	monoallelic	0	3	5	BOD1	173607145	173616659	biorientation of chromosomes in cell division 1 [Source:HGNC Symbol;Acc:HGNC:25114]	no	no	no	no
chr15	ENSG00000259781	monoallelic			monoallelic	monoallelic	0	3	15	HMGB1P6	71164770	71165415	high mobility group box 1 pseudogene 6 [Source:HGNC Symbol;Acc:HGNC:4998]	no	no	no	no
chrX	ENSG00000147274	monoallelic	monoallelic	monoallelic			0	3	X	RBMX	136848004	136880764	RNA binding motif protein X-linked [Source:HGNC Symbol;Acc:HGNC:9910]	no	no	no	yes
chrX	ENSG00000182484	monoallelic	biallelic	monoallelic	monoallelic	biallelic	2	3	X	WASH6P	156020826	156025710	WASP family homolog 6, pseudogene [Source:HGNC Symbol;Acc:HGNC:31685]	PAR2	no	no	no
chr1	ENSG00000268903		monoallelic		monoallelic	monoallelic	0	3	1		135141	135895	novel pseudogene	no	no	no	no
chr16	ENSG00000008517		monoallelic	monoallelic	monoallelic	biallelic	1	3	16	IL32	3065297	3082192	interleukin 32 [Source:HGNC Symbol;Acc:HGNC:16830]	no	no	no	no
chr17	ENSG00000278845		monoallelic	monoallelic	monoallelic		0	3	17	MRPL45	38297023	38323217	mitochondrial ribosomal protein L45 [Source:HGNC Symbol;Acc:HGNC:16651]	no	no	no	no
chr20	ENSG00000185513		monoallelic	monoallelic		monoallelic	0	3	20	L3MBTL1	43489442	43550954	L3MBTL histone methyl-lysine binding protein 1 [Source:HGNC Symbol;Acc:HGNC:15905]	no	no	no	no
chr11	ENSG00000168010			monoallelic	monoallelic	monoallelic	0	3	11	ATG16L2	72814406	72843674	autophagy related 16 like 2 [Source:HGNC Symbol;Acc:HGNC:25464]	no	no	no	no
chr13	ENSG00000214182			monoallelic	monoallelic	monoallelic	0	3	13	PTMAP5	81689911	81691072	prothymosin alpha pseudogene 5 [Source:HGNC Symbol;Acc:HGNC:9628]	no	no	no	no
chr1	ENSG00000188807	biallelic	monoallelic			monoallelic	1	2	1	TMEM201	9588911	9614877	transmembrane protein 201 [Source:HGNC Symbol;Acc:HGNC:33719]	no	no	no	no
chr1	ENSG00000213516	monoallelic	monoallelic				0	2	1	RBMXL1	88979456	88992960	RBMX like 1 [Source:HGNC Symbol;Acc:HGNC:25073]	no	no	no	no
chr2	ENSG00000115274	biallelic			monoallelic	monoallelic	1	2	2	INO80B	74455087	74457944	INO80 complex subunit B [Source:HGNC Symbol;Acc:HGNC:13324]	no	no	no	no
chr2	ENSG00000196604	biallelic	monoallelic	biallelic		monoallelic	2	2	2	POTEF	130073535	130129222	POTE ankyrin domain family member F [Source:HGNC Symbol;Acc:HGNC:33905]	no	no	no	no
chr2	ENSG00000204745	monoallelic	monoallelic				0	2	2		87125198	87196629	anaphase promoting complex subunit 1 (ANAPC1) pseudogene	no	no	no	no
chr3	ENSG00000144619	monoallelic			biallelic	monoallelic	1	2	3	CNTN4	2098813	3057959	contactin 4 [Source:HGNC Symbol;Acc:HGNC:2174]	no	no	no	no
chr3	ENSG00000154175	biallelic	biallelic	biallelic	monoallelic	monoallelic	3	2	3	ABI3BP	100749156	100993515	ABI family member 3 binding protein [Source:HGNC Symbol;Acc:HGNC:17265]	no	no	no	no
chr4	ENSG00000138759	biallelic	biallelic	biallelic	monoallelic	monoallelic	3	2	4	FRAS1	78057323	78544269	Fraser extracellular matrix complex subunit 1 [Source:HGNC Symbol;Acc:HGNC:19185]	no	no	no	no
chr5	ENSG00000215158	monoallelic		monoallelic	biallelic	biallelic	2	2	5	GUSBP18	34175822	34218343	GUSB pseudogene 18 [Source:HGNC Symbol;Acc:HGNC:55770]	no	no	no	no
chr6	ENSG00000145945	biallelic	monoallelic	monoallelic			1	2	6	FAM50B	3849373	3851320	family with sequence similarity 50 member B [Source:HGNC Symbol;Acc:HGNC:18789]	no	no	no	no
chr7	ENSG00000106484	monoallelic			biallelic	monoallelic	1	2	7	MEST	130486171	130506465	mesoderm specific transcript [Source:HGNC Symbol;Acc:HGNC:7028]	no	no	no	no
chr7	ENSG00000205085	biallelic	monoallelic	monoallelic			1	2	7	GARIN1A	128671693	128687877	golgi associated RAB2 interactor 1A [Source:HGNC Symbol;Acc:HGNC:27998]	no	no	no	no
chr11	ENSG00000110711	biallelic	monoallelic	monoallelic			1	2	11	AIP	67468174	67491154	aryl hydrocarbon receptor interacting protein [Source:HGNC Symbol;Acc:HGNC:358]	no	no	no	no
chr11	ENSG00000280143	monoallelic				monoallelic	0	2	11		117204967	117210292	novel transcript	no	no	no	no
chr12	ENSG00000013573	biallelic	monoallelic	monoallelic	biallelic	biallelic	3	2	12	DDX11	31073860	31104799	DEAD/H-box helicase 11 [Source:HGNC Symbol;Acc:HGNC:2736]	no	no	no	no
chr12	ENSG00000075856	biallelic	monoallelic	monoallelic			1	2	12	SART3	108522214	108561400	spliceosome associated factor 3, U4/U6 recycling protein [Source:HGNC Symbol;Acc:HGNC:16860]	no	no	no	no
chr12	ENSG00000111752	biallelic	monoallelic	monoallelic	biallelic	biallelic	3	2	12	PHC1	8913896	8941467	polyhomeotic homolog 1 [Source:HGNC Symbol;Acc:HGNC:3182]	no	no	no	no
chr12	ENSG00000179195	biallelic	monoallelic	monoallelic			1	2	12	ZNF664	123971845	124015439	zinc finger protein 664 [Source:HGNC Symbol;Acc:HGNC:25406]	no	no	no	no
chr13	ENSG00000121390	biallelic	biallelic	biallelic	monoallelic	monoallelic	3	2	13	PSPC1	19674752	19783019	paraspeckle component 1 [Source:HGNC Symbol;Acc:HGNC:20320]	no	no	no	no
chr14	ENSG00000072110	biallelic	monoallelic			monoallelic	1	2	14	ACTN1	68874128	68979440	actinin alpha 1 [Source:HGNC Symbol;Acc:HGNC:163]	no	no	no	no
chr14	ENSG00000131979	monoallelic	biallelic	monoallelic			1	2	14	GCH1	54842008	54902826	GTP cyclohydrolase 1 [Source:HGNC Symbol;Acc:HGNC:4193]	no	no	no	no
chr14	ENSG00000139921	monoallelic			monoallelic		0	2	14	TMX1	51240162	51257655	thioredoxin related transmembrane protein 1 [Source:HGNC Symbol;Acc:HGNC:15487]	no	no	no	no
chr14	ENSG00000225746	monoallelic		monoallelic			0	2	14	MEG8	100894770	101038859	maternally expressed 8, small nucleolar RNA host gene [Source:HGNC Symbol;Acc:HGNC:14574]	no	no	no	no
chr15	ENSG00000140263	biallelic	monoallelic	monoallelic			1	2	15	SORD	45023147	45077185	sorbitol dehydrogenase [Source:HGNC Symbol;Acc:HGNC:11184]	no	no	no	no
chr16	ENSG00000103512	biallelic	monoallelic	monoallelic	biallelic	biallelic	3	2	16	NOMO1	14833721	14896157	NODAL modulator 1 [Source:HGNC Symbol;Acc:HGNC:30060]	no	no	no	no
chr16	ENSG00000167981	monoallelic		monoallelic			0	2	16	ZNF597	3432414	3443504	zinc finger protein 597 [Source:HGNC Symbol;Acc:HGNC:26573]	no	no	no	no
chr16	ENSG00000183793	monoallelic		monoallelic			0	2	16	NPIPA5	15363628	15381047	nuclear pore complex interacting protein family member A5 [Source:HGNC Symbol;Acc:HGNC:41980]	no	no	no	no
chr16	ENSG00000205629	biallelic			monoallelic	monoallelic	1	2	16	LCMT1	25111731	25178231	leucine carboxyl methyltransferase 1 [Source:HGNC Symbol;Acc:HGNC:17557]	no	no	no	no
chr17	ENSG00000011295	biallelic		monoallelic		monoallelic	1	2	17	TTC19	15999784	16045015	tetratricopeptide repeat domain 19 [Source:HGNC Symbol;Acc:HGNC:26006]	no	no	no	no
chr17	ENSG00000108963	biallelic	biallelic	biallelic	monoallelic	monoallelic	3	2	17	DPH1	2030137	2043898	diphthamide biosynthesis 1 [Source:HGNC Symbol;Acc:HGNC:3003]	no	no	no	no
chr17	ENSG00000185158	biallelic			monoallelic	monoallelic	1	2	17	LRRC37B	32007383	32053504	leucine rich repeat containing 37B [Source:HGNC Symbol;Acc:HGNC:29070]	no	no	no	no
chr17	ENSG00000187688	monoallelic		biallelic		monoallelic	1	2	17	TRPV2	16415571	16437003	transient receptor potential cation channel subfamily V member 2 [Source:HGNC Symbol;Acc:HGNC:18082]	no	no	no	no
chr19	ENSG00000022556	biallelic			monoallelic	monoallelic	1	2	19	NLRP2	54953130	55001142	NLR family pyrin domain containing 2 [Source:HGNC Symbol;Acc:HGNC:22948]	no	no	no	no
chr19	ENSG00000129353	biallelic	monoallelic	monoallelic	biallelic	biallelic	3	2	19	SLC44A2	10602457	10644557	solute carrier family 44 member 2 [Source:HGNC Symbol;Acc:HGNC:17292]	no	no	no	no
chr19	ENSG00000174586	biallelic			monoallelic	monoallelic	1	2	19	ZNF497	58354357	58362848	zinc finger protein 497 [Source:HGNC Symbol;Acc:HGNC:23714]	no	no	no	no
chr22	ENSG00000100426	biallelic		monoallelic	monoallelic		1	2	22	ZBED4	49853844	49890080	zinc finger BED-type containing 4 [Source:HGNC Symbol;Acc:HGNC:20721]	no	no	no	no
chr1	ENSG00000228502		monoallelic	monoallelic			0	2	1	EEF1A1P11	96446930	96448318	eukaryotic translation elongation factor 1 alpha 1 pseudogene 11 [Source:HGNC Symbol;Acc:HGNC:3206]	no	no	no	no
chr4	ENSG00000177432		monoallelic	monoallelic			0	2	4	NAP1L5	88695913	88697829	nucleosome assembly protein 1 like 5 [Source:HGNC Symbol;Acc:HGNC:19968]	no	no	no	no
chr6	ENSG00000206341		monoallelic	monoallelic			0	2	6	HLA-H	29887752	29890482	major histocompatibility complex, class I, H (pseudogene) [Source:HGNC Symbol;Acc:HGNC:4965]	no	no	no	no
chr6	ENSG00000242574		monoallelic	monoallelic			0	2	6	HLA-DMB	32934629	32941028	major histocompatibility complex, class II, DM beta [Source:HGNC Symbol;Acc:HGNC:4935]	no	no	no	no
chr8	ENSG00000168300		monoallelic	monoallelic	biallelic	biallelic	2	2	8	PCMTD1	51817575	51899186	protein-L-isoaspartate (D-aspartate) O-methyltransferase domain containing 1 [Source:HGNC Symbol;Acc:HGNC:30483]	no	no	no	no
chr8	ENSG00000223508		monoallelic	monoallelic	biallelic	biallelic	2	2	8	RPL23AP53	213186	232231	ribosomal protein L23a pseudogene 53 [Source:HGNC Symbol;Acc:HGNC:35921]	no	no	no	no
chr10	ENSG00000156510		monoallelic	monoallelic			0	2	10	HKDC1	69220332	69267552	hexokinase domain containing 1 [Source:HGNC Symbol;Acc:HGNC:23302]	no	no	no	no
chr12	ENSG00000135406		monoallelic	monoallelic			0	2	12	PRPH	49295147	49298686	peripherin [Source:HGNC Symbol;Acc:HGNC:9461]	no	no	no	no
chr15	ENSG00000182636		monoallelic	monoallelic			0	2	15	NDN	23685400	23687305	necdin, MAGE family member [Source:HGNC Symbol;Acc:HGNC:7675]	no	no	no	no
chr17	ENSG00000233966		monoallelic	biallelic	monoallelic	biallelic	2	2	17	UBE2SP1	15704232	15704900	ubiquitin conjugating enzyme E2 S pseudogene 1 [Source:HGNC Symbol;Acc:HGNC:30864]	no	no	no	no
chrX	ENSG00000124333		monoallelic	monoallelic			0	2	X	VAMP7	155881345	155943769	vesicle associated membrane protein 7 [Source:HGNC Symbol;Acc:HGNC:11486]	PAR2	no	no	yes
chr1	ENSG00000271425			monoallelic	monoallelic		0	2	1	NBPF10	146064711	146229000	NBPF member 10 [Source:HGNC Symbol;Acc:HGNC:31992]	no	no	no	no
chr3	ENSG00000224769			monoallelic	monoallelic	biallelic	1	2	3	MUC20P1	195614947	195620233	mucin 20, cell surface associated pseudogene 1 [Source:HGNC Symbol;Acc:HGNC:51921]	no	no	no	no
chrX	ENSG00000094841			monoallelic	monoallelic		0	2	X	UPRT	75156388	75304885	uracil phosphoribosyltransferase homolog [Source:HGNC Symbol;Acc:HGNC:28334]	no	no	no	yes
chr1	ENSG00000227232				monoallelic	monoallelic	0	2	1	WASH7P	14404	29570	WASP family homolog 7, pseudogene [Source:HGNC Symbol;Acc:HGNC:38034]	no	no	no	no
chr2	ENSG00000068781				monoallelic	monoallelic	0	2	2	STON1-GTF2A1L	48529925	48776517	STON1-GTF2A1L readthrough [Source:HGNC Symbol;Acc:HGNC:30651]	no	no	no	no
chr7	ENSG00000270823				monoallelic	monoallelic	0	2	7		130495794	130498427	novel transcript, antisense to MEST	no	no	no	no
chr8	ENSG00000254285				monoallelic	monoallelic	0	2	8	KRT8P3	61578220	61579668	keratin 8 pseudogene 3 [Source:HGNC Symbol;Acc:HGNC:31056]	no	no	no	no
chr12	ENSG00000139239				monoallelic	monoallelic	0	2	12	RPL14P1	62965325	62965969	ribosomal protein L14 pseudogene 1 [Source:HGNC Symbol;Acc:HGNC:31384]	no	no	no	no
chr17	ENSG00000072210				monoallelic	monoallelic	0	2	17	ALDH3A2	19648136	19685760	aldehyde dehydrogenase 3 family member A2 [Source:HGNC Symbol;Acc:HGNC:403]	no	no	no	no
chr1	ENSG00000090020	biallelic	biallelic	biallelic	monoallelic		3	1	1	SLC9A1	27098809	27166981	solute carrier family 9 member A1 [Source:HGNC Symbol;Acc:HGNC:11071]	no	no	no	no
chr1	ENSG00000116285	biallelic	monoallelic				1	1	1	ERRFI1	8004404	8026309	ERBB receptor feedback inhibitor 1 [Source:HGNC Symbol;Acc:HGNC:18185]	no	no	no	no
chr1	ENSG00000116990	monoallelic					0	1	1	MYCL	39895426	39902256	MYCL proto-oncogene, bHLH transcription factor [Source:HGNC Symbol;Acc:HGNC:7555]	no	no	no	no
chr1	ENSG00000117262	monoallelic					0	1	1	GPR89A	145607988	145670650	G protein-coupled receptor 89A [Source:HGNC Symbol;Acc:HGNC:31984]	no	no	no	no
chr1	ENSG00000117408	biallelic			monoallelic		1	1	1	IPO13	43946950	43968022	importin 13 [Source:HGNC Symbol;Acc:HGNC:16853]	no	no	no	no
chr1	ENSG00000117410	biallelic	biallelic	biallelic	monoallelic		3	1	1	ATP6V0B	43974487	43978295	ATPase H+ transporting V0 subunit b [Source:HGNC Symbol;Acc:HGNC:861]	no	no	no	no
chr1	ENSG00000117597	biallelic	biallelic	biallelic		monoallelic	3	1	1	UTP25	209827972	209857565	UTP25 small subunit processome component [Source:HGNC Symbol;Acc:HGNC:28440]	no	no	no	no
chr1	ENSG00000121904	biallelic			monoallelic	biallelic	2	1	1	CSMD2	33513998	34165842	CUB and Sushi multiple domains 2 [Source:HGNC Symbol;Acc:HGNC:19290]	no	no	no	no
chr1	ENSG00000130768	monoallelic	biallelic	biallelic	biallelic	biallelic	4	1	1	SMPDL3B	27935000	27959157	sphingomyelin phosphodiesterase acid like 3B [Source:HGNC Symbol;Acc:HGNC:21416]	no	no	no	no
chr1	ENSG00000134258	biallelic		monoallelic			1	1	1	VTCN1	117143587	117210960	V-set domain containing T cell activation inhibitor 1 [Source:HGNC Symbol;Acc:HGNC:28873]	no	no	no	no
chr1	ENSG00000134369	biallelic		monoallelic			1	1	1	NAV1	201539127	201826969	neuron navigator 1 [Source:HGNC Symbol;Acc:HGNC:15989]	no	no	no	no
chr1	ENSG00000142733	biallelic	monoallelic		biallelic	biallelic	3	1	1	MAP3K6	27355184	27366961	mitogen-activated protein kinase kinase kinase 6 [Source:HGNC Symbol;Acc:HGNC:6858]	no	no	no	no
chr1	ENSG00000143178	biallelic	monoallelic			biallelic	2	1	1	TBX19	168280877	168314426	T-box transcription factor 19 [Source:HGNC Symbol;Acc:HGNC:11596]	no	no	no	no
chr1	ENSG00000152061	biallelic	biallelic	monoallelic			2	1	1	RABGAP1L	174159410	174995308	RAB GTPase activating protein 1 like [Source:HGNC Symbol;Acc:HGNC:24663]	no	no	no	no
chr1	ENSG00000158966	biallelic		monoallelic			1	1	1	CACHD1	64470129	64693058	cache domain containing 1 [Source:HGNC Symbol;Acc:HGNC:29314]	no	no	no	no
chr1	ENSG00000162390	biallelic			biallelic	monoallelic	2	1	1	ACOT11	54542257	54639192	acyl-CoA thioesterase 11 [Source:HGNC Symbol;Acc:HGNC:18156]	no	no	no	no
chr1	ENSG00000171943	monoallelic					0	1	1	SRGAP2C	121184811	121392874	SLIT-ROBO Rho GTPase activating protein 2C [Source:HGNC Symbol;Acc:HGNC:30584]	no	no	no	no
chr1	ENSG00000179397	monoallelic					0	1	1	CATSPERE	244454377	244641177	catsper channel auxiliary subunit epsilon [Source:HGNC Symbol;Acc:HGNC:28491]	no	no	no	no
chr1	ENSG00000180867	biallelic	biallelic	monoallelic			2	1	1	PDIA3P1	147172744	147179622	protein disulfide isomerase family A member 3 pseudogene 1 [Source:HGNC Symbol;Acc:HGNC:4607]	no	no	no	no
chr1	ENSG00000183682	monoallelic					0	1	1	BMP8A	39491636	39529869	bone morphogenetic protein 8a [Source:HGNC Symbol;Acc:HGNC:21650]	no	no	no	no
chr1	ENSG00000183853	biallelic		monoallelic			1	1	1	KIRREL1	157993273	158100262	kirre like nephrin family adhesion molecule 1 [Source:HGNC Symbol;Acc:HGNC:15734]	no	no	no	no
chr1	ENSG00000189339	biallelic		biallelic	monoallelic	biallelic	3	1	1	SLC35E2B	1659529	1692795	solute carrier family 35 member E2B [Source:HGNC Symbol;Acc:HGNC:33941]	no	no	no	no
chr1	ENSG00000198626	biallelic	monoallelic			biallelic	2	1	1	RYR2	237042184	237833988	ryanodine receptor 2 [Source:HGNC Symbol;Acc:HGNC:10484]	no	no	no	no
chr1	ENSG00000213085	biallelic		biallelic		monoallelic	2	1	1	CFAP45	159872364	159900165	cilia and flagella associated protein 45 [Source:HGNC Symbol;Acc:HGNC:17229]	no	no	no	no
chr1	ENSG00000215883	biallelic			monoallelic	biallelic	2	1	1	CYB5RL	54169651	54200036	cytochrome b5 reductase like [Source:HGNC Symbol;Acc:HGNC:32220]	no	no	no	no
chr1	ENSG00000219481	monoallelic	biallelic	biallelic	biallelic	biallelic	4	1	1	NBPF1	16562319	16613562	NBPF member 1 [Source:HGNC Symbol;Acc:HGNC:26088]	no	no	no	no
chr1	ENSG00000263956	biallelic			monoallelic		1	1	1	NBPF11	148102047	148152322	NBPF member 11 [Source:HGNC Symbol;Acc:HGNC:31993]	no	no	no	no
chr2	ENSG00000035115	biallelic		monoallelic	biallelic	biallelic	3	1	2	SH3YL1	217730	266398	SH3 and SYLF domain containing 1 [Source:HGNC Symbol;Acc:HGNC:29546]	no	no	no	no
chr2	ENSG00000057935	biallelic				monoallelic	1	1	2	MTA3	42494569	42756947	metastasis associated 1 family member 3 [Source:HGNC Symbol;Acc:HGNC:23784]	no	no	no	no
chr2	ENSG00000115423	biallelic	monoallelic		biallelic		2	1	2	DNAH6	84516455	84819589	dynein axonemal heavy chain 6 [Source:HGNC Symbol;Acc:HGNC:2951]	no	no	no	no
chr2	ENSG00000115694	biallelic		monoallelic	biallelic	biallelic	3	1	2	STK25	241492670	241509730	serine/threonine kinase 25 [Source:HGNC Symbol;Acc:HGNC:11404]	no	no	no	no
chr2	ENSG00000115806	biallelic	monoallelic		biallelic	biallelic	3	1	2	GORASP2	170928464	170967130	golgi reassembly stacking protein 2 [Source:HGNC Symbol;Acc:HGNC:17500]	no	no	no	no
chr2	ENSG00000118997	biallelic	biallelic	biallelic		monoallelic	3	1	2	DNAH7	195737703	196068837	dynein axonemal heavy chain 7 [Source:HGNC Symbol;Acc:HGNC:18661]	no	no	no	no
chr2	ENSG00000124374	monoallelic			biallelic	biallelic	2	1	2	PAIP2B	71182738	71227103	poly(A) binding protein interacting protein 2B [Source:HGNC Symbol;Acc:HGNC:29200]	no	no	no	no
chr2	ENSG00000130294	biallelic	monoallelic				1	1	2	KIF1A	240713761	240824293	kinesin family member 1A [Source:HGNC Symbol;Acc:HGNC:888]	no	no	no	no
chr2	ENSG00000130414	biallelic			monoallelic	biallelic	2	1	2	NDUFA10	239892450	240025743	NADH:ubiquinone oxidoreductase subunit A10 [Source:HGNC Symbol;Acc:HGNC:7684]	no	no	no	no
chr2	ENSG00000135926	monoallelic					0	1	2	TMBIM1	218274197	218292586	transmembrane BAX inhibitor motif containing 1 [Source:HGNC Symbol;Acc:HGNC:23410]	no	no	no	no
chr2	ENSG00000135930	monoallelic					0	1	2	EIF4E2	232550659	232583644	eukaryotic translation initiation factor 4E family member 2 [Source:HGNC Symbol;Acc:HGNC:3293]	no	no	no	no
chr2	ENSG00000144229	monoallelic	biallelic	biallelic		biallelic	3	1	2	THSD7B	136765545	137677718	thrombospondin type 1 domain containing 7B [Source:HGNC Symbol;Acc:HGNC:29348]	no	no	no	no
chr2	ENSG00000146205	monoallelic					0	1	2	ANO7	241188509	241225976	anoctamin 7 [Source:HGNC Symbol;Acc:HGNC:31677]	no	no	no	no
chr2	ENSG00000152076	biallelic			monoallelic	biallelic	2	1	2	CCDC74B	130139287	130145134	coiled-coil domain containing 74B [Source:HGNC Symbol;Acc:HGNC:25267]	no	no	no	no
chr2	ENSG00000157856	biallelic	monoallelic		biallelic	biallelic	3	1	2	DRC1	26401920	26456711	dynein regulatory complex subunit 1 [Source:HGNC Symbol;Acc:HGNC:24245]	no	no	no	no
chr2	ENSG00000172965	monoallelic					0	1	2	MIR4435-2HG	111006015	111523376	MIR4435-2 host gene [Source:HGNC Symbol;Acc:HGNC:35163]	no	no	no	no
chr2	ENSG00000186684	monoallelic	biallelic				1	1	2	CYP27C1	127183832	127220313	cytochrome P450 family 27 subfamily C member 1 [Source:HGNC Symbol;Acc:HGNC:33480]	no	no	no	no
chr3	ENSG00000031081	biallelic	monoallelic				1	1	3	ARHGAP31	119294383	119420714	Rho GTPase activating protein 31 [Source:HGNC Symbol;Acc:HGNC:29216]	no	no	no	no
chr3	ENSG00000088538	monoallelic					0	1	3	DOCK3	50674927	51384198	dedicator of cytokinesis 3 [Source:HGNC Symbol;Acc:HGNC:2989]	no	no	no	no
chr3	ENSG00000091972	biallelic		monoallelic	biallelic	biallelic	3	1	3	CD200	112332347	112362812	CD200 molecule [Source:HGNC Symbol;Acc:HGNC:7203]	no	no	no	no
chr3	ENSG00000113971	monoallelic	biallelic	biallelic	biallelic	biallelic	4	1	3	NPHP3	132680609	132722432	nephrocystin 3 [Source:HGNC Symbol;Acc:HGNC:7907]	no	no	no	no
chr3	ENSG00000121577	monoallelic		biallelic			1	1	3	POPDC2	119636457	119665324	popeye domain containing 2 [Source:HGNC Symbol;Acc:HGNC:17648]	no	no	no	no
chr3	ENSG00000144559	monoallelic	biallelic	biallelic	biallelic	biallelic	4	1	3	TAMM41	11790442	11846919	TAM41 mitochondrial translocator assembly and maintenance homolog [Source:HGNC Symbol;Acc:HGNC:25187]	no	no	no	no
chr3	ENSG00000144712	monoallelic	biallelic	biallelic			2	1	3	CAND2	12796472	12834804	cullin associated and neddylation dissociated 2 (putative) [Source:HGNC Symbol;Acc:HGNC:30689]	no	no	no	no
chr3	ENSG00000154783	biallelic	biallelic	biallelic		monoallelic	3	1	3	FGD5	14810853	14934571	FYVE, RhoGEF and PH domain containing 5 [Source:HGNC Symbol;Acc:HGNC:19117]	no	no	no	no
chr3	ENSG00000158163	biallelic		monoallelic	biallelic	biallelic	3	1	3	DZIP1L	138061990	138115818	DAZ interacting zinc finger protein 1 like [Source:HGNC Symbol;Acc:HGNC:26551]	no	no	no	no
chr3	ENSG00000163931	monoallelic	biallelic	biallelic	biallelic	biallelic	4	1	3	TKT	53224712	53256052	transketolase [Source:HGNC Symbol;Acc:HGNC:11834]	no	no	no	no
chr3	ENSG00000175093	monoallelic			biallelic	biallelic	2	1	3	SPSB4	141051347	141148611	splA/ryanodine receptor domain and SOCS box containing 4 [Source:HGNC Symbol;Acc:HGNC:30630]	no	no	no	no
chr3	ENSG00000176945	monoallelic	biallelic	biallelic			2	1	3	MUC20	195720884	195741123	mucin 20, cell surface associated [Source:HGNC Symbol;Acc:HGNC:23282]	no	no	no	no
chr3	ENSG00000181555	biallelic		monoallelic	biallelic	biallelic	3	1	3	SETD2	47016428	47164113	SET domain containing 2, histone lysine methyltransferase [Source:HGNC Symbol;Acc:HGNC:18420]	no	no	no	no
chr3	ENSG00000206530	biallelic		monoallelic	biallelic	biallelic	3	1	3	CFAP44	113286930	113441610	cilia and flagella associated protein 44 [Source:HGNC Symbol;Acc:HGNC:25631]	no	no	no	no
chr4	ENSG00000002587	monoallelic					0	1	4	HS3ST1	11393150	11429564	heparan sulfate-glucosamine 3-sulfotransferase 1 [Source:HGNC Symbol;Acc:HGNC:5194]	no	no	no	no
chr4	ENSG00000109586	biallelic	biallelic	biallelic	monoallelic		3	1	4	GALNT7	173168811	173323967	polypeptide N-acetylgalactosaminyltransferase 7 [Source:HGNC Symbol;Acc:HGNC:4129]	no	no	no	no
chr4	ENSG00000138738	monoallelic	biallelic	biallelic			2	1	4	PRDM5	120684919	120922870	PR/SET domain 5 [Source:HGNC Symbol;Acc:HGNC:9349]	no	no	no	no
chr4	ENSG00000145241	biallelic		monoallelic	biallelic	biallelic	3	1	4	CENPC	67468762	67545503	centromere protein C [Source:HGNC Symbol;Acc:HGNC:1854]	no	no	no	no
chr4	ENSG00000173376	biallelic	monoallelic		biallelic	biallelic	3	1	4	NDNF	121035613	121073021	neuron derived neurotrophic factor [Source:HGNC Symbol;Acc:HGNC:26256]	no	no	no	no
chr5	ENSG00000082213	biallelic	monoallelic				1	1	5	C5orf22	31532287	31555053	chromosome 5 open reading frame 22 [Source:HGNC Symbol;Acc:HGNC:25639]	no	no	no	no
chr5	ENSG00000113161	monoallelic			biallelic	biallelic	2	1	5	HMGCR	75336329	75364001	3-hydroxy-3-methylglutaryl-CoA reductase [Source:HGNC Symbol;Acc:HGNC:5006]	no	no	no	no
chr5	ENSG00000133706	biallelic	monoallelic				1	1	5	LARS1	146110566	146182696	leucyl-tRNA synthetase 1 [Source:HGNC Symbol;Acc:HGNC:6512]	no	no	no	no
chr5	ENSG00000155846	biallelic	biallelic	monoallelic			2	1	5	PPARGC1B	149730298	149855022	PPARG coactivator 1 beta [Source:HGNC Symbol;Acc:HGNC:30022]	no	no	no	no
chr5	ENSG00000168944	monoallelic	biallelic	biallelic	biallelic	biallelic	4	1	5	CEP120	123344890	123423592	centrosomal protein 120 [Source:HGNC Symbol;Acc:HGNC:26690]	no	no	no	no
chr5	ENSG00000170549	monoallelic					0	1	5	IRX1	3595832	3601403	iroquois homeobox 1 [Source:HGNC Symbol;Acc:HGNC:14358]	no	no	no	no
chr5	ENSG00000176783	biallelic	biallelic	biallelic	monoallelic		3	1	5	RUFY1	179550554	179610012	RUN and FYVE domain containing 1 [Source:HGNC Symbol;Acc:HGNC:19760]	no	no	no	no
chr5	ENSG00000183666	monoallelic			biallelic	biallelic	2	1	5	GUSBP1	21459560	21501826	GUSB pseudogene 1 [Source:HGNC Symbol;Acc:HGNC:13670]	no	no	no	no
chr5	ENSG00000225138	biallelic	biallelic	monoallelic		biallelic	3	1	5	SLC9A3-AS1	473236	480884	SLC9A3 antisense RNA 1 [Source:HGNC Symbol;Acc:HGNC:40550]	no	no	no	no
chr5	ENSG00000250182	monoallelic					0	1	5	EEF1A1P13	14651941	14653329	eukaryotic translation elongation factor 1 alpha 1 pseudogene 13 [Source:HGNC Symbol;Acc:HGNC:3196]	no	no	no	no
chr6	ENSG00000001084	monoallelic					0	1	6	GCLC	53497341	53616970	glutamate-cysteine ligase catalytic subunit [Source:HGNC Symbol;Acc:HGNC:4311]	no	no	no	no
chr6	ENSG00000065833	biallelic	biallelic	biallelic		monoallelic	3	1	6	ME1	83210402	83431051	malic enzyme 1 [Source:HGNC Symbol;Acc:HGNC:6983]	no	no	no	no
chr6	ENSG00000078269	biallelic	biallelic	biallelic		monoallelic	3	1	6	SYNJ2	157981863	158099176	synaptojanin 2 [Source:HGNC Symbol;Acc:HGNC:11504]	no	no	no	no
chr6	ENSG00000112182	biallelic	biallelic	monoallelic			2	1	6	BACH2	89926528	90296843	BTB domain and CNC homolog 2 [Source:HGNC Symbol;Acc:HGNC:14078]	no	no	no	no
chr6	ENSG00000112320	monoallelic					0	1	6	SOBP	107490106	107661306	sine oculis binding protein homolog [Source:HGNC Symbol;Acc:HGNC:29256]	no	no	no	no
chr6	ENSG00000112419	monoallelic			biallelic	biallelic	2	1	6	PHACTR2	143536845	143831185	phosphatase and actin regulator 2 [Source:HGNC Symbol;Acc:HGNC:20956]	no	no	no	no
chr6	ENSG00000112659	biallelic	monoallelic	biallelic		biallelic	3	1	6	CUL9	43182184	43224587	cullin 9 [Source:HGNC Symbol;Acc:HGNC:15982]	no	no	no	no
chr6	ENSG00000112679	monoallelic	biallelic	biallelic	biallelic	biallelic	4	1	6	DUSP22	291630	351355	dual specificity phosphatase 22 [Source:HGNC Symbol;Acc:HGNC:16077]	no	no	no	no
chr6	ENSG00000118482	biallelic		monoallelic			1	1	6	PHF3	63635802	63779336	PHD finger protein 3 [Source:HGNC Symbol;Acc:HGNC:8921]	no	no	no	no
chr6	ENSG00000137267	monoallelic					0	1	6	TUBB2A	3153497	3157544	tubulin beta 2A class IIa [Source:HGNC Symbol;Acc:HGNC:12412]	no	no	no	no
chr6	ENSG00000137285	monoallelic					0	1	6	TUBB2B	3223324	3231730	tubulin beta 2B class IIb [Source:HGNC Symbol;Acc:HGNC:30829]	no	no	no	no
chr6	ENSG00000161904	biallelic	biallelic	biallelic	monoallelic		3	1	6	LEMD2	33771202	33789130	LEM domain nuclear envelope protein 2 [Source:HGNC Symbol;Acc:HGNC:21244]	no	no	no	no
chr6	ENSG00000164674	biallelic			monoallelic		1	1	6	SYTL3	158650014	158764876	synaptotagmin like 3 [Source:HGNC Symbol;Acc:HGNC:15587]	no	no	no	no
chr6	ENSG00000164694	biallelic	monoallelic			biallelic	2	1	6	FNDC1	159169400	159272108	fibronectin type III domain containing 1 [Source:HGNC Symbol;Acc:HGNC:21184]	no	no	no	no
chr6	ENSG00000185345	biallelic		monoallelic			1	1	6	PRKN	161347417	162727775	parkin RBR E3 ubiquitin protein ligase [Source:HGNC Symbol;Acc:HGNC:8607]	no	no	no	no
chr6	ENSG00000196569	biallelic	biallelic	biallelic		monoallelic	3	1	6	LAMA2	128883138	129516566	laminin subunit alpha 2 [Source:HGNC Symbol;Acc:HGNC:6482]	no	no	no	no
chr6	ENSG00000204348	monoallelic					0	1	6	DXO	31969810	31972290	decapping exoribonuclease [Source:HGNC Symbol;Acc:HGNC:2992]	no	no	no	no
chr6	ENSG00000212802	monoallelic					0	1	6	RPL15P3	12514110	12514724	ribosomal protein L15 pseudogene 3 [Source:HGNC Symbol;Acc:HGNC:21538]	no	no	no	no
chr7	ENSG00000008311	monoallelic					0	1	7	AASS	122064583	122144308	aminoadipate-semialdehyde synthase [Source:HGNC Symbol;Acc:HGNC:17366]	no	no	no	no
chr7	ENSG00000050327	biallelic		monoallelic			1	1	7	ARHGEF5	144355288	144380632	Rho guanine nucleotide exchange factor 5 [Source:HGNC Symbol;Acc:HGNC:13209]	no	no	no	no
chr7	ENSG00000087085	biallelic			monoallelic	biallelic	2	1	7	ACHE	100889994	100896974	acetylcholinesterase (Cartwright blood group) [Source:HGNC Symbol;Acc:HGNC:108]	no	no	no	no
chr7	ENSG00000122778	biallelic		monoallelic	biallelic	biallelic	3	1	7	KIAA1549	138831381	138981389	KIAA1549 [Source:HGNC Symbol;Acc:HGNC:22219]	no	no	no	no
chr7	ENSG00000127399	monoallelic	biallelic	biallelic			2	1	7	LRRC61	150323263	150338156	leucine rich repeat containing 61 [Source:HGNC Symbol;Acc:HGNC:21704]	no	no	no	no
chr7	ENSG00000130226	monoallelic					0	1	7	DPP6	153748133	154894285	dipeptidyl peptidase like 6 [Source:HGNC Symbol;Acc:HGNC:3010]	no	no	no	no
chr7	ENSG00000154710	monoallelic					0	1	7	RABGEF1	66682164	66811464	RAB guanine nucleotide exchange factor 1 [Source:HGNC Symbol;Acc:HGNC:17676]	no	no	no	no
chr7	ENSG00000164535	monoallelic			biallelic	biallelic	2	1	7	DAGLB	6409126	6484190	diacylglycerol lipase beta [Source:HGNC Symbol;Acc:HGNC:28923]	no	no	no	no
chr7	ENSG00000164713	biallelic	monoallelic	biallelic	biallelic	biallelic	4	1	7	BRI3	98252379	98310441	brain protein I3 [Source:HGNC Symbol;Acc:HGNC:1109]	no	no	no	no
chr7	ENSG00000170632	biallelic		monoallelic	biallelic	biallelic	3	1	7	ARMC10	103074881	103099759	armadillo repeat containing 10 [Source:HGNC Symbol;Acc:HGNC:21706]	no	no	no	no
chr7	ENSG00000173678	monoallelic					0	1	7	SPDYE2B	102650319	102662625	speedy/RINGO cell cycle regulator family member E2B [Source:HGNC Symbol;Acc:HGNC:48334]	no	no	no	no
chr7	ENSG00000174428	biallelic			monoallelic		1	1	7	GTF2IRD2B	75092573	75149817	GTF2I repeat domain containing 2B [Source:HGNC Symbol;Acc:HGNC:33125]	no	no	no	no
chr7	ENSG00000177706	monoallelic			biallelic	biallelic	2	1	7	FAM20C	192571	260772	FAM20C golgi associated secretory pathway kinase [Source:HGNC Symbol;Acc:HGNC:22140]	no	no	no	no
chr7	ENSG00000187391	biallelic	biallelic			monoallelic	2	1	7	MAGI2	78017055	79453667	membrane associated guanylate kinase, WW and PDZ domain containing 2 [Source:HGNC Symbol;Acc:HGNC:18957]	no	no	no	no
chr7	ENSG00000197093	biallelic	biallelic	biallelic		monoallelic	3	1	7	GAL3ST4	100159244	100168617	galactose-3-O-sulfotransferase 4 [Source:HGNC Symbol;Acc:HGNC:24145]	no	no	no	no
chr7	ENSG00000205578	monoallelic					0	1	7	POM121B	73293497	73301161	POM121 transmembrane nucleoporin B (pseudogene) [Source:HGNC Symbol;Acc:HGNC:34004]	no	no	no	no
chr7	ENSG00000214439	biallelic	biallelic	monoallelic		biallelic	3	1	7	FAM185BP	77083886	77122116	family with sequence similarity 185 member B, pseudogene [Source:HGNC Symbol;Acc:HGNC:21813]	no	no	no	no
chr7	ENSG00000242265	monoallelic					0	1	7	PEG10	94656325	94669695	paternally expressed 10 [Source:HGNC Symbol;Acc:HGNC:14005]	no	no	no	no
chr7	ENSG00000243302	biallelic				monoallelic	1	1	7		128651185	128652334	novel pseudogene	no	no	no	no
chr7	ENSG00000260097	monoallelic	biallelic				1	1	7	SPDYE6	102345746	102356444	speedy/RINGO cell cycle regulator family member E6 [Source:HGNC Symbol;Acc:HGNC:35465]	no	no	no	no
chr7	ENSG00000263001	monoallelic			biallelic	biallelic	2	1	7	GTF2I	74650231	74760692	general transcription factor IIi [Source:HGNC Symbol;Acc:HGNC:4659]	no	no	no	no
chr7	ENSG00000277072	monoallelic					0	1	7	STAG3L2	74882705	74890402	stromal antigen 3-like 2 (pseudogene) [Source:HGNC Symbol;Acc:HGNC:33886]	no	no	no	no
chr8	ENSG00000012232	monoallelic	biallelic	biallelic			2	1	8	EXTL3	28600469	28756561	exostosin like glycosyltransferase 3 [Source:HGNC Symbol;Acc:HGNC:3518]	no	no	no	no
chr8	ENSG00000040341	biallelic	biallelic	biallelic		monoallelic	3	1	8	STAU2	73420369	73747708	staufen double-stranded RNA binding protein 2 [Source:HGNC Symbol;Acc:HGNC:11371]	no	no	no	no
chr8	ENSG00000104518	monoallelic		biallelic	biallelic		2	1	8	GSDMD	143553207	143563062	gasdermin D [Source:HGNC Symbol;Acc:HGNC:25697]	no	no	no	no
chr8	ENSG00000147457	monoallelic	biallelic	biallelic			2	1	8	CHMP7	23243637	23262000	charged multivesicular body protein 7 [Source:HGNC Symbol;Acc:HGNC:28439]	no	no	no	no
chr8	ENSG00000171316	biallelic			monoallelic		1	1	8	CHD7	60678740	60868028	chromodomain helicase DNA binding protein 7 [Source:HGNC Symbol;Acc:HGNC:20626]	no	no	no	no
chr8	ENSG00000178209	biallelic	biallelic	biallelic		monoallelic	3	1	8	PLEC	143915153	143976734	plectin [Source:HGNC Symbol;Acc:HGNC:9069]	no	no	no	no
chr8	ENSG00000178685	biallelic	biallelic	biallelic		monoallelic	3	1	8	PARP10	143977153	144012772	poly(ADP-ribose) polymerase family member 10 [Source:HGNC Symbol;Acc:HGNC:25895]	no	no	no	no
chr8	ENSG00000184661	biallelic	biallelic	biallelic	monoallelic		3	1	8	CDCA2	25459199	25507911	cell division cycle associated 2 [Source:HGNC Symbol;Acc:HGNC:14623]	no	no	no	no
chr8	ENSG00000253570	monoallelic					0	1	8	RNF5P1	38600661	38601200	ring finger protein 5 pseudogene 1 [Source:HGNC Symbol;Acc:HGNC:31053]	no	no	no	no
chr9	ENSG00000095397	biallelic	biallelic	biallelic		monoallelic	3	1	9	WHRN	114402080	114505473	whirlin [Source:HGNC Symbol;Acc:HGNC:16361]	no	no	no	no
chr9	ENSG00000106804	biallelic	monoallelic		biallelic	biallelic	3	1	9	C5	120932987	121075195	complement C5 [Source:HGNC Symbol;Acc:HGNC:1331]	no	no	no	no
chr9	ENSG00000130653	biallelic	biallelic	biallelic		monoallelic	3	1	9	PNPLA7	137459952	137550402	patatin like phospholipase domain containing 7 [Source:HGNC Symbol;Acc:HGNC:24768]	no	no	no	no
chr9	ENSG00000130714	biallelic			monoallelic		1	1	9	POMT1	131502789	131523806	protein O-mannosyltransferase 1 [Source:HGNC Symbol;Acc:HGNC:9202]	no	no	no	no
chr9	ENSG00000131669	biallelic		monoallelic			1	1	9	NINJ1	93121496	93134251	ninjurin 1 [Source:HGNC Symbol;Acc:HGNC:7824]	no	no	no	no
chr9	ENSG00000147996	monoallelic		biallelic	biallelic	biallelic	3	1	9	ZNG1E	65668805	65734041	Zn regulated GTPase metalloprotein activator 1E [Source:HGNC Symbol;Acc:HGNC:24584]	no	no	no	no
chr9	ENSG00000148411	biallelic	monoallelic		biallelic	biallelic	3	1	9	NACC2	136006537	136095289	NACC family member 2 [Source:HGNC Symbol;Acc:HGNC:23846]	no	no	no	no
chr9	ENSG00000158079	biallelic	monoallelic				1	1	9	PTPDC1	94030794	94109856	protein tyrosine phosphatase domain containing 1 [Source:HGNC Symbol;Acc:HGNC:30184]	no	no	no	no
chr9	ENSG00000175787	monoallelic			biallelic	biallelic	2	1	9	ZNF169	94259298	94301829	zinc finger protein 169 [Source:HGNC Symbol;Acc:HGNC:12957]	no	no	no	no
chr9	ENSG00000186130	biallelic			monoallelic		1	1	9	ZBTB6	122908056	122913323	zinc finger and BTB domain containing 6 [Source:HGNC Symbol;Acc:HGNC:16764]	no	no	no	no
chr9	ENSG00000188152	monoallelic					0	1	9	NUTM2G	96928310	96940253	NUT family member 2G [Source:HGNC Symbol;Acc:HGNC:23449]	no	no	no	no
chr9	ENSG00000196730	biallelic		monoallelic	biallelic	biallelic	3	1	9	DAPK1	87497228	87708634	death associated protein kinase 1 [Source:HGNC Symbol;Acc:HGNC:2674]	no	no	no	no
chr9	ENSG00000197694	biallelic				monoallelic	1	1	9	SPTAN1	128552558	128633662	spectrin alpha, non-erythrocytic 1 [Source:HGNC Symbol;Acc:HGNC:11273]	no	no	no	no
chr9	ENSG00000233016	biallelic				monoallelic	1	1	9	SNHG7	136721366	136728184	small nucleolar RNA host gene 7 [Source:HGNC Symbol;Acc:HGNC:28254]	no	no	no	no
chr9	ENSG00000238227	biallelic	biallelic	biallelic		monoallelic	3	1	9	TMEM250	136114581	136118875	transmembrane protein 250 [Source:HGNC Symbol;Acc:HGNC:31009]	no	no	no	no
chr9	ENSG00000254473	biallelic	biallelic	monoallelic			2	1	9	UBQLN1-AS1	83707594	83713496	UBQLN1 antisense RNA 1 [Source:HGNC Symbol;Acc:HGNC:55518]	no	no	no	no
chr9	ENSG00000274026	biallelic	biallelic	monoallelic			2	1	9	FAM27E3	67717411	67719178	family with sequence similarity 27 member E3 [Source:HGNC Symbol;Acc:HGNC:28655]	no	no	no	no
chr10	ENSG00000107738	biallelic				monoallelic	1	1	10	VSIR	71747556	71773520	V-set immunoregulatory receptor [Source:HGNC Symbol;Acc:HGNC:30085]	no	no	no	no
chr10	ENSG00000107957	monoallelic	biallelic	biallelic	biallelic	biallelic	4	1	10	SH3PXD2A	103594027	103855584	SH3 and PX domains 2A [Source:HGNC Symbol;Acc:HGNC:23664]	no	no	no	no
chr10	ENSG00000119943	monoallelic					0	1	10	PYROXD2	98383565	98415182	pyridine nucleotide-disulphide oxidoreductase domain 2 [Source:HGNC Symbol;Acc:HGNC:23517]	no	no	no	no
chr10	ENSG00000120051	biallelic	monoallelic				1	1	10	CFAP58	104353833	104455102	cilia and flagella associated protein 58 [Source:HGNC Symbol;Acc:HGNC:26676]	no	no	no	no
chr10	ENSG00000130649	biallelic	monoallelic	biallelic	biallelic	biallelic	4	1	10	CYP2E1	133520406	133561220	cytochrome P450 family 2 subfamily E member 1 [Source:HGNC Symbol;Acc:HGNC:2631]	no	no	no	no
chr10	ENSG00000151651	biallelic	biallelic	monoallelic	biallelic	biallelic	4	1	10	ADAM8	133262420	133276868	ADAM metallopeptidase domain 8 [Source:HGNC Symbol;Acc:HGNC:215]	no	no	no	no
chr10	ENSG00000156042	biallelic				monoallelic	1	1	10	CFAP70	73253762	73358864	cilia and flagella associated protein 70 [Source:HGNC Symbol;Acc:HGNC:30726]	no	no	no	no
chr10	ENSG00000165338	monoallelic					0	1	10	HECTD2	91409280	91514829	HECT domain E3 ubiquitin protein ligase 2 [Source:HGNC Symbol;Acc:HGNC:26736]	no	no	no	no
chr10	ENSG00000170430	biallelic	biallelic	biallelic	biallelic	monoallelic	4	1	10	MGMT	129467190	129770983	O-6-methylguanine-DNA methyltransferase [Source:HGNC Symbol;Acc:HGNC:7059]	no	no	no	no
chr10	ENSG00000181192	biallelic	biallelic	biallelic	monoallelic		3	1	10	DHTKD1	12068954	12123221	dehydrogenase E1 and transketolase domain containing 1 [Source:HGNC Symbol;Acc:HGNC:23537]	no	no	no	no
chr10	ENSG00000187134	biallelic	monoallelic		biallelic		2	1	10	AKR1C1	4963253	4983283	aldo-keto reductase family 1 member C1 [Source:HGNC Symbol;Acc:HGNC:384]	no	no	no	no
chr10	ENSG00000196233	biallelic				monoallelic	1	1	10	LCOR	96832254	96995956	ligand dependent nuclear receptor corepressor [Source:HGNC Symbol;Acc:HGNC:29503]	no	no	no	no
chr10	ENSG00000204740	monoallelic	biallelic			biallelic	2	1	10	MALRD1	19048801	19790401	MAM and LDL receptor class A domain containing 1 [Source:HGNC Symbol;Acc:HGNC:24331]	no	no	no	no
chr10	ENSG00000214562	biallelic	monoallelic	biallelic			2	1	10	NUTM2D	87357720	87370695	NUT family member 2D [Source:HGNC Symbol;Acc:HGNC:23447]	no	no	no	no
chr10	ENSG00000285257	monoallelic	biallelic	biallelic			2	1	10		87214136	87216173	synaptotagmin 15 (SYT15) pseudogene	no	no	no	no
chr11	ENSG00000005801	biallelic				monoallelic	1	1	11	ZNF195	3339261	3379222	zinc finger protein 195 [Source:HGNC Symbol;Acc:HGNC:12986]	no	no	no	no
chr11	ENSG00000060749	monoallelic					0	1	11	QSER1	32892811	32993316	glutamine and serine rich 1 [Source:HGNC Symbol;Acc:HGNC:26154]	no	no	no	no
chr11	ENSG00000110077	biallelic	biallelic	biallelic	monoallelic		3	1	11	MS4A6A	60172015	60184666	membrane spanning 4-domains A6A [Source:HGNC Symbol;Acc:HGNC:13375]	no	no	no	no
chr11	ENSG00000110169	monoallelic					0	1	11	HPX	6431049	6442617	hemopexin [Source:HGNC Symbol;Acc:HGNC:5171]	no	no	no	no
chr11	ENSG00000137507	biallelic	monoallelic				1	1	11	LRRC32	76657524	76670747	leucine rich repeat containing 32 [Source:HGNC Symbol;Acc:HGNC:4161]	no	no	no	no
chr11	ENSG00000137513	biallelic	monoallelic				1	1	11	NARS2	78435620	78575194	asparaginyl-tRNA synthetase 2, mitochondrial [Source:HGNC Symbol;Acc:HGNC:26274]	no	no	no	no
chr11	ENSG00000142089	monoallelic	biallelic	biallelic	biallelic	biallelic	4	1	11	IFITM3	319676	329475	interferon induced transmembrane protein 3 [Source:HGNC Symbol;Acc:HGNC:5414]	no	no	no	no
chr11	ENSG00000149115	biallelic	biallelic	biallelic		monoallelic	3	1	11	TNKS1BP1	57299638	57324952	tankyrase 1 binding protein 1 [Source:HGNC Symbol;Acc:HGNC:19081]	no	no	no	no
chr11	ENSG00000149743	monoallelic	biallelic	biallelic			2	1	11	TRPT1	64223799	64226254	tRNA phosphotransferase 1 [Source:HGNC Symbol;Acc:HGNC:20316]	no	no	no	no
chr11	ENSG00000158555	biallelic	biallelic	biallelic	monoallelic		3	1	11	GDPD5	75434640	75525941	glycerophosphodiester phosphodiesterase domain containing 5 [Source:HGNC Symbol;Acc:HGNC:28804]	no	no	no	no
chr11	ENSG00000165905	monoallelic					0	1	11	LARGE2	45921621	45929096	LARGE xylosyl- and glucuronyltransferase 2 [Source:HGNC Symbol;Acc:HGNC:16522]	no	no	no	no
chr11	ENSG00000166012	biallelic				monoallelic	1	1	11	TAF1D	93729948	93784391	TATA-box binding protein associated factor, RNA polymerase I subunit D [Source:HGNC Symbol;Acc:HGNC:28759]	no	no	no	no
chr11	ENSG00000166340	biallelic	biallelic	monoallelic	biallelic	biallelic	4	1	11	TPP1	6612768	6619448	tripeptidyl peptidase 1 [Source:HGNC Symbol;Acc:HGNC:2073]	no	no	no	no
chr11	ENSG00000166492	monoallelic	biallelic	biallelic	biallelic	biallelic	4	1	11	FAM86GP	3410352	3422496	family with sequence similarity 86 member G, pseudogene [Source:HGNC Symbol;Acc:HGNC:42358]	no	no	no	no
chr11	ENSG00000171204	monoallelic					0	1	11	TMEM126B	85628573	85636539	transmembrane protein 126B [Source:HGNC Symbol;Acc:HGNC:30883]	no	no	no	no
chr11	ENSG00000173020	biallelic		monoallelic			1	1	11	GRK2	67266473	67286556	G protein-coupled receptor kinase 2 [Source:HGNC Symbol;Acc:HGNC:289]	no	no	no	no
chr11	ENSG00000228915	monoallelic					0	1	11	OR7E128P	71893410	71894433	olfactory receptor family 7 subfamily E member 128 pseudogene [Source:HGNC Symbol;Acc:HGNC:15305]	no	no	no	no
chr12	ENSG00000008323	biallelic	monoallelic	biallelic			2	1	12	PLEKHG6	6310436	6328506	pleckstrin homology and RhoGEF domain containing G6 [Source:HGNC Symbol;Acc:HGNC:25562]	no	no	no	no
chr12	ENSG00000111788	biallelic	biallelic	biallelic		monoallelic	3	1	12		9277235	9313241	DEAD/H (Asp-Glu-Ala-Asp/His) box polypeptide like pseudogene	no	no	no	no
chr12	ENSG00000135119	biallelic			monoallelic		1	1	12	RNFT2	116738178	116853631	ring finger protein, transmembrane 2 [Source:HGNC Symbol;Acc:HGNC:25905]	no	no	no	no
chr12	ENSG00000136010	monoallelic					0	1	12	ALDH1L2	105019784	105107643	aldehyde dehydrogenase 1 family member L2 [Source:HGNC Symbol;Acc:HGNC:26777]	no	no	no	no
chr12	ENSG00000158023	biallelic	monoallelic		biallelic	biallelic	3	1	12	CFAP251	121918592	122003927	cilia and flagella associated protein 251 [Source:HGNC Symbol;Acc:HGNC:28506]	no	no	no	no
chr12	ENSG00000185163	biallelic	monoallelic	biallelic	biallelic	biallelic	4	1	12	DDX51	132136594	132144319	DEAD-box helicase 51 [Source:HGNC Symbol;Acc:HGNC:20082]	no	no	no	no
chr12	ENSG00000189238	monoallelic					0	1	12	LINC00943	126723412	126749027	long intergenic non-protein coding RNA 943 [Source:HGNC Symbol;Acc:HGNC:48639]	no	no	no	no
chr12	ENSG00000215021	biallelic		monoallelic			1	1	12	PHB2	6965327	6970780	prohibitin 2 [Source:HGNC Symbol;Acc:HGNC:30306]	no	no	no	no
chr12	ENSG00000227825	monoallelic					0	1	12	SLC9A7P1	98453835	98457145	solute carrier family 9 member 7 pseudogene 1 [Source:HGNC Symbol;Acc:HGNC:32679]	no	no	no	no
chr12	ENSG00000238105	monoallelic		biallelic			1	1	12	GOLGA2P5	100156621	100173159	GOLGA2 pseudogene 5 [Source:HGNC Symbol;Acc:HGNC:25315]	no	no	no	no
chr13	ENSG00000102678	monoallelic					0	1	13	FGF9	21671073	21704498	fibroblast growth factor 9 [Source:HGNC Symbol;Acc:HGNC:3687]	no	no	no	no
chr13	ENSG00000130177	monoallelic					0	1	13	CDC16	114234887	114272723	cell division cycle 16 [Source:HGNC Symbol;Acc:HGNC:1720]	no	no	no	no
chr13	ENSG00000150457	biallelic	biallelic	biallelic	monoallelic		3	1	13	LATS2	20973036	21061586	large tumor suppressor kinase 2 [Source:HGNC Symbol;Acc:HGNC:6515]	no	no	no	no
chr13	ENSG00000172915	monoallelic	biallelic	biallelic	biallelic	biallelic	4	1	13	NBEA	34942270	35673022	neurobeachin [Source:HGNC Symbol;Acc:HGNC:7648]	no	no	no	no
chr14	ENSG00000100664	biallelic	monoallelic	biallelic	biallelic	biallelic	4	1	14	EIF5	103333544	103345025	eukaryotic translation initiation factor 5 [Source:HGNC Symbol;Acc:HGNC:3299]	no	no	no	no
chr14	ENSG00000126214	biallelic				monoallelic	1	1	14	KLC1	103561896	103714249	kinesin light chain 1 [Source:HGNC Symbol;Acc:HGNC:6387]	no	no	no	no
chr14	ENSG00000179841	biallelic	biallelic	monoallelic			2	1	14	AKAP5	64465499	64474503	A-kinase anchoring protein 5 [Source:HGNC Symbol;Acc:HGNC:375]	no	no	no	no
chr14	ENSG00000182218	monoallelic	biallelic	biallelic	biallelic		3	1	14	HHIPL1	99645129	99680569	HHIP like 1 [Source:HGNC Symbol;Acc:HGNC:19710]	no	no	no	no
chr14	ENSG00000185567	biallelic	biallelic		biallelic	monoallelic	3	1	14	AHNAK2	104937244	104978374	AHNAK nucleoprotein 2 [Source:HGNC Symbol;Acc:HGNC:20125]	no	no	no	no
chr14	ENSG00000199012	monoallelic					0	1	14	MIR412	101065447	101065537	microRNA 412 [Source:HGNC Symbol;Acc:HGNC:32064]	no	no	no	no
chr14	ENSG00000224861	monoallelic					0	1	14	YBX1P1	66012830	66013789	Y-box binding protein 1 pseudogene 1 [Source:HGNC Symbol;Acc:HGNC:8015]	no	no	no	no
chr15	ENSG00000104093	biallelic	biallelic	biallelic	monoallelic		3	1	15	DMXL2	51447711	51622833	Dmx like 2 [Source:HGNC Symbol;Acc:HGNC:2938]	no	no	no	no
chr15	ENSG00000128849	biallelic	biallelic	biallelic		monoallelic	3	1	15	CGNL1	57375967	57550717	cingulin like 1 [Source:HGNC Symbol;Acc:HGNC:25931]	no	no	no	no
chr15	ENSG00000129009	monoallelic	biallelic	biallelic			2	1	15	ISLR	74173710	74176872	immunoglobulin superfamily containing leucine rich repeat [Source:HGNC Symbol;Acc:HGNC:6133]	no	no	no	no
chr15	ENSG00000140386	biallelic		monoallelic	biallelic	biallelic	3	1	15	SCAPER	76347904	76905444	S-phase cyclin A associated protein in the ER [Source:HGNC Symbol;Acc:HGNC:13081]	no	no	no	no
chr15	ENSG00000140400	monoallelic	biallelic	biallelic			2	1	15	MAN2C1	75355207	75368612	mannosidase alpha class 2C member 1 [Source:HGNC Symbol;Acc:HGNC:6827]	no	no	no	no
chr15	ENSG00000178802	biallelic		monoallelic			1	1	15	MPI	74890005	74902219	mannose phosphate isomerase [Source:HGNC Symbol;Acc:HGNC:7216]	no	no	no	no
chr15	ENSG00000179335	biallelic			monoallelic		1	1	15	CLK3	74598500	74645414	CDC like kinase 3 [Source:HGNC Symbol;Acc:HGNC:2071]	no	no	no	no
chr15	ENSG00000184056	monoallelic		biallelic			1	1	15	VPS33B	90998673	91022603	VPS33B late endosome and lysosome associated [Source:HGNC Symbol;Acc:HGNC:12712]	no	no	no	no
chr15	ENSG00000253954	monoallelic					0	1	15	HMGN1P38	92711808	92712110	high mobility group nucleosome binding domain 1 pseudogene 38 [Source:HGNC Symbol;Acc:HGNC:39422]	no	no	no	no
chr15	ENSG00000259658	monoallelic			biallelic	biallelic	2	1	15	UBE2Q2P13	101732201	101745983	UBE2Q2 pseudogene 13 [Source:HGNC Symbol;Acc:HGNC:56078]	no	no	no	no
chr16	ENSG00000007545	monoallelic	biallelic	biallelic	biallelic	biallelic	4	1	16	CRAMP1	1612337	1677908	cramped chromatin regulator homolog 1 [Source:HGNC Symbol;Acc:HGNC:14122]	no	no	no	no
chr16	ENSG00000102893	monoallelic			biallelic	biallelic	2	1	16	PHKB	47461123	47701523	phosphorylase kinase regulatory subunit beta [Source:HGNC Symbol;Acc:HGNC:8927]	no	no	no	no
chr16	ENSG00000103024	biallelic			monoallelic		1	1	16	NME3	1770320	1771561	NME/NM23 nucleoside diphosphate kinase 3 [Source:HGNC Symbol;Acc:HGNC:7851]	no	no	no	no
chr16	ENSG00000103148	biallelic			monoallelic	biallelic	2	1	16	NPRL3	84271	138677	NPR3 like, GATOR1 complex subunit [Source:HGNC Symbol;Acc:HGNC:14124]	no	no	no	no
chr16	ENSG00000103226	monoallelic					0	1	16	NOMO3	16232506	16300806	NODAL modulator 3 [Source:HGNC Symbol;Acc:HGNC:25242]	no	no	no	no
chr16	ENSG00000103248	monoallelic	biallelic	biallelic			2	1	16	MTHFSD	86530178	86555235	methenyltetrahydrofolate synthetase domain containing [Source:HGNC Symbol;Acc:HGNC:25778]	no	no	no	no
chr16	ENSG00000103365	monoallelic	biallelic	biallelic			2	1	16	GGA2	23463542	23521995	golgi associated, gamma adaptin ear containing, ARF binding protein 2 [Source:HGNC Symbol;Acc:HGNC:16064]	no	no	no	no
chr16	ENSG00000103549	monoallelic					0	1	16	RNF40	30761745	30776307	ring finger protein 40 [Source:HGNC Symbol;Acc:HGNC:16867]	no	no	no	no
chr16	ENSG00000131148	monoallelic					0	1	16	EMC8	85771758	85799608	ER membrane protein complex subunit 8 [Source:HGNC Symbol;Acc:HGNC:7864]	no	no	no	no
chr16	ENSG00000161996	monoallelic	biallelic	biallelic	biallelic	biallelic	4	1	16	WDR90	649311	667833	WD repeat domain 90 [Source:HGNC Symbol;Acc:HGNC:26960]	no	no	no	no
chr16	ENSG00000167978	biallelic		monoallelic	biallelic	biallelic	3	1	16	SRRM2	2752626	2772538	serine/arginine repetitive matrix 2 [Source:HGNC Symbol;Acc:HGNC:16639]	no	no	no	no
chr16	ENSG00000172530	monoallelic	biallelic	biallelic	biallelic	biallelic	4	1	16	BANP	87949244	88077318	BTG3 associated nuclear protein [Source:HGNC Symbol;Acc:HGNC:13450]	no	no	no	no
chr16	ENSG00000185710	monoallelic					0	1	16	SMG1P4	21879338	21916024	SMG1 pseudogene 4 [Source:HGNC Symbol;Acc:HGNC:49861]	no	no	no	no
chr16	ENSG00000226180	biallelic	biallelic	monoallelic			2	1	16		87693537	87696147	novel transcript	no	no	no	no
chr16	ENSG00000254206	monoallelic		biallelic	biallelic		2	1	16	NPIPB11	29381310	29406711	nuclear pore complex interacting protein family member B11 [Source:HGNC Symbol;Acc:HGNC:37453]	no	no	no	no
chr17	ENSG00000006025	monoallelic	biallelic	biallelic			2	1	17	OSBPL7	47807372	47821834	oxysterol binding protein like 7 [Source:HGNC Symbol;Acc:HGNC:16387]	no	no	no	no
chr17	ENSG00000007312	monoallelic					0	1	17	CD79B	63928738	63932336	CD79b molecule [Source:HGNC Symbol;Acc:HGNC:1699]	no	no	no	no
chr17	ENSG00000068079	monoallelic					0	1	17	IFI35	43006740	43014456	interferon induced protein 35 [Source:HGNC Symbol;Acc:HGNC:5399]	no	no	no	no
chr17	ENSG00000072818	biallelic	monoallelic		biallelic	biallelic	3	1	17	ACAP1	7336529	7351477	ArfGAP with coiled-coil, ankyrin repeat and PH domains 1 [Source:HGNC Symbol;Acc:HGNC:16467]	no	no	no	no
chr17	ENSG00000087191	biallelic		monoallelic	biallelic	biallelic	3	1	17	PSMC5	63827152	63832026	proteasome 26S subunit, ATPase 5 [Source:HGNC Symbol;Acc:HGNC:9552]	no	no	no	no
chr17	ENSG00000108828	biallelic		monoallelic			1	1	17	VAT1	43014607	43025123	vesicle amine transport 1 [Source:HGNC Symbol;Acc:HGNC:16919]	no	no	no	no
chr17	ENSG00000108852	biallelic			monoallelic		1	1	17	MPP2	43875357	43909711	MAGUK p55 scaffold protein 2 [Source:HGNC Symbol;Acc:HGNC:7220]	no	no	no	no
chr17	ENSG00000109063	biallelic		monoallelic	biallelic	biallelic	3	1	17	MYH3	10628526	10657309	myosin heavy chain 3 [Source:HGNC Symbol;Acc:HGNC:7573]	no	no	no	no
chr17	ENSG00000121064	biallelic	biallelic	biallelic	monoallelic		3	1	17	SCPEP1	56978129	57006768	serine carboxypeptidase 1 [Source:HGNC Symbol;Acc:HGNC:29507]	no	no	no	no
chr17	ENSG00000132591	biallelic		monoallelic	biallelic	biallelic	3	1	17	ERAL1	28855010	28861061	Era like 12S mitochondrial rRNA chaperone 1 [Source:HGNC Symbol;Acc:HGNC:3424]	no	no	no	no
chr17	ENSG00000161509	biallelic	monoallelic	biallelic	biallelic	biallelic	4	1	17	GRIN2C	74842023	74861504	glutamate ionotropic receptor NMDA type subunit 2C [Source:HGNC Symbol;Acc:HGNC:4587]	no	no	no	no
chr17	ENSG00000178607	biallelic		monoallelic	biallelic	biallelic	3	1	17	ERN1	64039080	64130819	endoplasmic reticulum to nucleus signaling 1 [Source:HGNC Symbol;Acc:HGNC:3449]	no	no	no	no
chr17	ENSG00000179314	biallelic		monoallelic	biallelic	biallelic	3	1	17	WSCD1	6057807	6124427	WSC domain containing 1 [Source:HGNC Symbol;Acc:HGNC:29060]	no	no	no	no
chr17	ENSG00000188878	biallelic				monoallelic	1	1	17	FBF1	75909574	75941140	Fas binding factor 1 [Source:HGNC Symbol;Acc:HGNC:24674]	no	no	no	no
chr17	ENSG00000224383	monoallelic	biallelic	biallelic	biallelic		3	1	17	PRR29	63998351	64004305	proline rich 29 [Source:HGNC Symbol;Acc:HGNC:25673]	no	no	no	no
chr17	ENSG00000274180	monoallelic					0	1	17	NATD1	21238870	21253410	N-acetyltransferase domain containing 1 [Source:HGNC Symbol;Acc:HGNC:30770]	no	no	no	no
chr19	ENSG00000075702	biallelic			monoallelic		1	1	19	WDR62	36054649	36105108	WD repeat domain 62 [Source:HGNC Symbol;Acc:HGNC:24502]	no	no	no	no
chr19	ENSG00000089335	monoallelic					0	1	19	ZNF302	34677639	34686397	zinc finger protein 302 [Source:HGNC Symbol;Acc:HGNC:13848]	no	no	no	no
chr19	ENSG00000099822	monoallelic	biallelic	biallelic	biallelic	biallelic	4	1	19	HCN2	589881	617159	hyperpolarization activated cyclic nucleotide gated potassium and sodium channel 2 [Source:HGNC Symbol;Acc:HGNC:4846]	no	no	no	no
[truncated: 9,183 more rows]

## Sheet: Fibro_mono_bi_shared
Supplemental Data S2: List of mono and biallelic SNPs assigned to each 47,XYY fibroblasts
[truncated: 8,431 more rows]

## Sheet: Mono-Biallelic SNPs Summary
Supplemental Data S2: Summary of mono and biallelic SNPs assigned in each cell type.
[truncated: 7 more rows]

[truncated: 3 more sheets: Monoallelic_snps_Wes_reads, Monoallelic SNPs in the X chrom, Legend]
