# Supplementary material for: An iPSC-based model of 47,XYY Jacobs syndrome reveals a DNA methylation-independent transcriptional dysregulation shared with male X aneuploid cells
Source: Genome Res. 2025 Jul;35(7):1503–17. doi: 10.1101/gr.279716.124 (PMC12212075; doi:10.1101/gr.279716.124)
Supplement: Supplement 4 [file Supplemental_Data_S3_R3.xlsx]

## Sheet: Fibroblasts
Supplemental Data S3: List of Expressed Genes in 47,XYY and 46,XY Fibroblasts, iPSCs and NSCs
ensembl_gene_id	baseMean	log2FoldChange	lfcSE	stat	pvalue	padj	chromosome_name	hgnc_symbol	start_position	end_position	description	isPAR	escape_Tukianien	variable_Tukianien	inactive_Tukianien
ENSG00000000003	947.167	-0.00842958	0.130558	-0.0645659	0.94852	0.976968	X	TSPAN6	100627108	100639991	tetraspanin 6 [Source:HGNC Symbol;Acc:HGNC:11858]	no	no	yes	no
ENSG00000000419	1500.6	-0.138094	0.167566	-0.824119	0.409872	0.635734	20	DPM1	50934867	50959140	dolichyl-phosphate mannosyltransferase subunit 1, catalytic [Source:HGNC Symbol;Acc:HGNC:3005]	no	no	no	no
ENSG00000000457	368.233	-0.0630903	0.160576	-0.3929	0.694393	0.836203	1	SCYL3	169849631	169894267	SCY1 like pseudokinase 3 [Source:HGNC Symbol;Acc:HGNC:19285]	no	no	no	no
ENSG00000000460	253.067	-0.336711	0.231353	-1.4554	0.145558	0.337085	1	C1orf112	169662007	169854080	chromosome 1 open reading frame 112 [Source:HGNC Symbol;Acc:HGNC:25565]	no	no	no	no
ENSG00000000971	1039.98	-0.00537625	0.433596	-0.0123992	0.990107	0.993913	1	CFH	196651754	196752476	complement factor H [Source:HGNC Symbol;Acc:HGNC:4883]	no	no	no	no
ENSG00000001036	3741.86	-0.361206	0.122054	-2.95938	0.00308256	0.0186397	6	FUCA2	143494812	143511720	alpha-L-fucosidase 2 [Source:HGNC Symbol;Acc:HGNC:4008]	no	no	no	no
ENSG00000001084	552	-0.541403	0.199803	-2.70969	0.00673468	0.0347348	6	GCLC	53497341	53616970	glutamate-cysteine ligase catalytic subunit [Source:HGNC Symbol;Acc:HGNC:4311]	no	no	no	no
ENSG00000001167	1286.02	0.0731742	0.200162	0.365574	0.714683	0.84836	6	NFYA	41072974	41102403	nuclear transcription factor Y subunit alpha [Source:HGNC Symbol;Acc:HGNC:7804]	no	no	no	no
ENSG00000001460	593.258	-0.236498	0.136285	-1.73532	0.0826835	0.231516	1	STPG1	24356999	24416934	sperm tail PG-rich repeat containing 1 [Source:HGNC Symbol;Acc:HGNC:28070]	no	no	no	no
ENSG00000001461	4010.13	-0.177455	0.119034	-1.4908	0.136014	0.321426	1	NIPAL3	24415802	24472976	NIPA like domain containing 3 [Source:HGNC Symbol;Acc:HGNC:25233]	no	no	no	no
ENSG00000001497	1341.14	-0.126227	0.15106	-0.83561	0.403375	0.629884	X	LAS1L	65438549	65534810	LAS1 like ribosome biogenesis factor [Source:HGNC Symbol;Acc:HGNC:25726]	no	no	no	yes
ENSG00000001561	49.6027	0.760311	0.418181	1.81814	0.0690429	0.203558	6	ENPP4	46129989	46146688	ectonucleotide pyrophosphatase/phosphodiesterase 4 [Source:HGNC Symbol;Acc:HGNC:3359]	no	no	no	no
ENSG00000001617	573.183	-0.999455	0.239745	-4.16882	3.06177e-05	0.000357478	3	SEMA3F	50155045	50189075	semaphorin 3F [Source:HGNC Symbol;Acc:HGNC:10728]	no	no	no	no
ENSG00000001629	4189.26	-0.077834	0.100556	-0.774035	0.43891	0.659717	7	ANKIB1	92245974	92401383	ankyrin repeat and IBR domain containing 1 [Source:HGNC Symbol;Acc:HGNC:22215]	no	no	no	no
ENSG00000001630	126.926	-1.00446	0.221155	-4.5419	5.57488e-06	8.12181e-05	7	CYP51A1	92084987	92134803	cytochrome P450 family 51 subfamily A member 1 [Source:HGNC Symbol;Acc:HGNC:2649]	no	no	no	no
ENSG00000001631	306.781	0.0341952	0.1455	0.235019	0.814194	0.903286	7	KRIT1	92197498	92246166	KRIT1 ankyrin repeat containing [Source:HGNC Symbol;Acc:HGNC:1573]	no	no	no	no
ENSG00000002016	458.027	0.10605	0.145521	0.728757	0.46615	0.680321	12	RAD52	911736	990053	RAD52 homolog, DNA repair protein [Source:HGNC Symbol;Acc:HGNC:9824]	no	no	no	no
ENSG00000002330	448.192	-0.262132	0.187905	-1.39503	0.163008	0.361783	11	BAD	64269830	64284704	BCL2 associated agonist of cell death [Source:HGNC Symbol;Acc:HGNC:936]	no	no	no	no
ENSG00000002549	2172	-0.119011	0.192146	-0.619381	0.535665	0.732548	4	LAP3	17577198	17607972	leucine aminopeptidase 3 [Source:HGNC Symbol;Acc:HGNC:18449]	no	no	no	no
ENSG00000002586	38410.5	0.394978	0.184868	2.13654	0.0326352	0.117981	X	CD99	2691187	2741309	CD99 molecule (Xg blood group) [Source:HGNC Symbol;Acc:HGNC:7082]	PAR1	no	no	no
ENSG00000002745	669.381	0.373528	0.606112	0.616268	0.537717	0.734307	7	WNT16	121325367	121341104	Wnt family member 16 [Source:HGNC Symbol;Acc:HGNC:16267]	no	no	no	no
ENSG00000002746	254.832	-0.489989	0.232231	-2.10992	0.034865	0.124134	7	HECW1	43112629	43566001	HECT, C2 and WW domain containing E3 ubiquitin protein ligase 1 [Source:HGNC Symbol;Acc:HGNC:22195]	no	no	no	no
ENSG00000002834	28623.9	-0.40773	0.19215	-2.12193	0.0338434	0.121185	17	LASP1	38869859	38921770	LIM and SH3 protein 1 [Source:HGNC Symbol;Acc:HGNC:6513]	no	no	no	no
ENSG00000002919	821.885	0.0359646	0.195884	0.183601	0.854326	0.926366	17	SNX11	48103357	48123601	sorting nexin 11 [Source:HGNC Symbol;Acc:HGNC:14975]	no	no	no	no
ENSG00000003056	2736.46	-0.377761	0.18963	-1.9921	0.0463605	0.152986	12	M6PR	8940361	8949761	mannose-6-phosphate receptor, cation dependent [Source:HGNC Symbol;Acc:HGNC:6752]	no	no	no	no
ENSG00000003137	335.188	0.31373	0.42387	0.740158	0.459204	0.675908	2	CYP26B1	72129238	72147862	cytochrome P450 family 26 subfamily B member 1 [Source:HGNC Symbol;Acc:HGNC:20581]	no	no	no	no
ENSG00000003393	2170.63	0.0299892	0.140818	0.212964	0.831355	0.912564	2	ALS2	201700267	201782112	alsin Rho guanine nucleotide exchange factor ALS2 [Source:HGNC Symbol;Acc:HGNC:443]	no	no	no	no
ENSG00000003400	143.619	-1.83934	0.360504	-5.10213	3.35847e-07	6.582e-06	2	CASP10	201182872	201229428	caspase 10 [Source:HGNC Symbol;Acc:HGNC:1500]	no	no	no	no
ENSG00000003402	2936.05	-0.109482	0.100584	-1.08847	0.27639	0.505897	2	CFLAR	201116154	201176687	CASP8 and FADD like apoptosis regulator [Source:HGNC Symbol;Acc:HGNC:1876]	no	no	no	no
ENSG00000003436	1333.03	-0.0829836	0.235744	-0.352007	0.724833	0.854513	2	TFPI	187464230	187565760	tissue factor pathway inhibitor [Source:HGNC Symbol;Acc:HGNC:11760]	no	no	no	no
ENSG00000003509	566.768	0.112505	0.104082	1.08093	0.279729	0.51002	2	NDUFAF7	37231631	37253403	NADH:ubiquinone oxidoreductase complex assembly factor 7 [Source:HGNC Symbol;Acc:HGNC:28816]	no	no	no	no
ENSG00000003756	4271.17	0.0148078	0.160189	0.0924396	0.926349	0.964962	3	RBM5	50088919	50119021	RNA binding motif protein 5 [Source:HGNC Symbol;Acc:HGNC:9902]	no	no	no	no
ENSG00000004059	2920.06	-0.109724	0.167643	-0.654509	0.512784	0.716545	7	ARF5	127588386	127591700	ADP ribosylation factor 5 [Source:HGNC Symbol;Acc:HGNC:658]	no	no	no	no
ENSG00000004139	370.833	0.246844	0.179549	1.3748	0.169192	0.370582	17	SARM1	28364356	28404049	sterile alpha and TIR motif containing 1 [Source:HGNC Symbol;Acc:HGNC:17074]	no	no	no	no
ENSG00000004142	3930.35	-0.123633	0.13897	-0.889634	0.373662	0.603228	17	POLDIP2	28346633	28357527	DNA polymerase delta interacting protein 2 [Source:HGNC Symbol;Acc:HGNC:23781]	no	no	no	no
ENSG00000004399	11012.9	-1.02826	0.180488	-5.69711	1.21853e-08	3.19683e-07	3	PLXND1	129555214	129606676	plexin D1 [Source:HGNC Symbol;Acc:HGNC:9107]	no	no	no	no
ENSG00000004455	4183.68	0.0500281	0.112436	0.444947	0.656358	0.81265	1	AK2	33007986	33080996	adenylate kinase 2 [Source:HGNC Symbol;Acc:HGNC:362]	no	no	no	no
ENSG00000004478	1527.15	-0.124823	0.196694	-0.634605	0.525686	0.72556	12	FKBP4	2794970	2805423	FKBP prolyl isomerase 4 [Source:HGNC Symbol;Acc:HGNC:3720]	no	no	no	no
ENSG00000004487	4014.57	0.334814	0.17991	1.86101	0.0627434	0.190311	1	KDM1A	23019443	23083689	lysine demethylase 1A [Source:HGNC Symbol;Acc:HGNC:29079]	no	no	no	no
ENSG00000004534	4280.28	0.153536	0.11172	1.3743	0.169349	0.370794	3	RBM6	49940007	50100045	RNA binding motif protein 6 [Source:HGNC Symbol;Acc:HGNC:9903]	no	no	no	no
ENSG00000004660	741.501	-0.103954	0.214925	-0.483673	0.628618	0.795895	17	CAMKK1	3860315	3894891	calcium/calmodulin dependent protein kinase kinase 1 [Source:HGNC Symbol;Acc:HGNC:1469]	no	no	no	no
ENSG00000004700	2895.11	-0.269569	0.165372	-1.63007	0.103086	0.267886	12	RECQL	21468910	21501669	RecQ like helicase [Source:HGNC Symbol;Acc:HGNC:9948]	no	no	no	no
ENSG00000004766	906.686	-0.318272	0.0800925	-3.97381	7.0732e-05	0.000762308	7	VPS50	93232340	93361123	VPS50 subunit of EARP/GARPII complex [Source:HGNC Symbol;Acc:HGNC:25956]	no	no	no	no
ENSG00000004776	2248.87	-0.0484361	0.197753	-0.244933	0.806508	0.898888	19	HSPB6	35754566	35758079	heat shock protein family B (small) member 6 [Source:HGNC Symbol;Acc:HGNC:26511]	no	no	no	no
ENSG00000004777	564.648	0.0416246	0.172614	0.241142	0.809445	0.900371	19	ARHGAP33	35774532	35788822	Rho GTPase activating protein 33 [Source:HGNC Symbol;Acc:HGNC:23085]	no	no	no	no
ENSG00000004779	1199.83	0.19773	0.125829	1.57142	0.116084	0.288875	16	NDUFAB1	23581014	23596316	NADH:ubiquinone oxidoreductase subunit AB1 [Source:HGNC Symbol;Acc:HGNC:7694]	no	no	no	no
ENSG00000004799	48.9967	1.1225	0.714056	1.57201	0.115949	0.28883	7	PDK4	95583499	95596516	pyruvate dehydrogenase kinase 4 [Source:HGNC Symbol;Acc:HGNC:8812]	no	no	no	no
ENSG00000004864	520.004	-0.37895	0.224539	-1.68768	0.091473	0.246679	7	SLC25A13	96120220	96322147	solute carrier family 25 member 13 [Source:HGNC Symbol;Acc:HGNC:10983]	no	no	no	no
ENSG00000004866	580.621	0.306906	0.101361	3.02784	0.0024631	0.0155114	7	ST7	116953238	117230176	suppression of tumorigenicity 7 [Source:HGNC Symbol;Acc:HGNC:11351]	no	no	no	no
ENSG00000004897	5374.51	-0.118412	0.187205	-0.632527	0.527043	0.726273	17	CDC27	47117703	47189422	cell division cycle 27 [Source:HGNC Symbol;Acc:HGNC:1728]	no	no	no	no
ENSG00000004961	948.173	-0.140161	0.117981	-1.18799	0.234836	0.45758	X	HCCS	11111301	11123086	holocytochrome c synthase [Source:HGNC Symbol;Acc:HGNC:4837]	no	no	no	yes
ENSG00000004975	1814.55	-0.093379	0.155835	-0.599219	0.549027	0.742698	17	DVL2	7225342	7234517	dishevelled segment polarity protein 2 [Source:HGNC Symbol;Acc:HGNC:3086]	no	no	no	no
ENSG00000005007	4688.28	-0.204112	0.109997	-1.85562	0.063508	0.191801	19	UPF1	18831959	18868230	UPF1 RNA helicase and ATPase [Source:HGNC Symbol;Acc:HGNC:9962]	no	no	no	no
ENSG00000005020	1476.01	-0.304423	0.193796	-1.57084	0.11622	0.288895	7	SKAP2	26667068	26995239	src kinase associated phosphoprotein 2 [Source:HGNC Symbol;Acc:HGNC:15687]	no	no	no	no
ENSG00000005022	3902.09	-0.161237	0.19184	-0.840475	0.400642	0.626806	X	SLC25A5	119468422	119471396	solute carrier family 25 member 5 [Source:HGNC Symbol;Acc:HGNC:10991]	no	no	no	yes
ENSG00000005059	650.822	-0.622146	0.169726	-3.66558	0.00024678	0.0022633	4	MCUB	109560209	109688719	mitochondrial calcium uniporter dominant negative subunit beta [Source:HGNC Symbol;Acc:HGNC:26076]	no	no	no	no
ENSG00000005073	262.222	-0.281354	0.742777	-0.378787	0.704846	0.842209	7	HOXA11	27181157	27185232	homeobox A11 [Source:HGNC Symbol;Acc:HGNC:5101]	no	no	no	no
ENSG00000005075	937.719	-0.0757762	0.138696	-0.546349	0.584826	0.767224	7	POLR2J	102473128	102478922	RNA polymerase II subunit J [Source:HGNC Symbol;Acc:HGNC:9197]	no	no	no	no
ENSG00000005100	1360.41	-0.307408	0.158815	-1.93563	0.0529132	0.168325	17	DHX33	5440917	5468982	DEAH-box helicase 33 [Source:HGNC Symbol;Acc:HGNC:16718]	no	no	no	no
ENSG00000005156	1408.24	0.0112338	0.141048	0.079645	0.93652	0.97075	17	LIG3	34980512	35009743	DNA ligase 3 [Source:HGNC Symbol;Acc:HGNC:6600]	no	no	no	no
ENSG00000005175	1339.07	-0.050668	0.18524	-0.273526	0.784449	0.887032	12	RPAP3	47661249	47706030	RNA polymerase II associated protein 3 [Source:HGNC Symbol;Acc:HGNC:26151]	no	no	no	no
ENSG00000005189	205.324	-0.549982	0.217464	-2.52908	0.0114363	0.0527552	16	REXO5	20806429	20849665	RNA exonuclease 5 [Source:HGNC Symbol;Acc:HGNC:24661]	no	no	no	no
ENSG00000005194	1270.27	-0.0410454	0.181608	-0.226011	0.821193	0.907084	16	CIAPIN1	57428187	57447420	cytokine induced apoptosis inhibitor 1 [Source:HGNC Symbol;Acc:HGNC:28050]	no	no	no	no
ENSG00000005206	1654.32	0.087369	0.164571	0.53089	0.595495	0.773667	19	SPPL2B	2328615	2355095	signal peptide peptidase like 2B [Source:HGNC Symbol;Acc:HGNC:30627]	no	no	no	no
ENSG00000005238	2649.05	0.328305	0.17303	1.89738	0.0577775	0.179295	9	ATOSB	35104112	35116341	atos homolog B [Source:HGNC Symbol;Acc:HGNC:25666]	no	no	no	no
ENSG00000005243	3327.76	-0.422731	0.104844	-4.03199	5.53075e-05	0.000612616	17	COPZ2	48026167	48038030	COPI coat complex subunit zeta 2 [Source:HGNC Symbol;Acc:HGNC:19356]	no	no	no	no
ENSG00000005249	257.244	0.0334887	0.325482	0.10289	0.91805	0.96124	7	PRKAR2B	107044705	107161811	protein kinase cAMP-dependent type II regulatory subunit beta [Source:HGNC Symbol;Acc:HGNC:9392]	no	no	no	no
ENSG00000005302	1416.26	0.0807023	0.160929	0.501477	0.616035	0.786466	X	MSL3	11758159	11775772	MSL complex subunit 3 [Source:HGNC Symbol;Acc:HGNC:7370]	no	yes	no	no
ENSG00000005339	4714.64	0.0356993	0.120359	0.296607	0.766767	0.878573	16	CREBBP	3725054	3880713	CREB binding protein [Source:HGNC Symbol;Acc:HGNC:2348]	no	no	no	no
ENSG00000005379	654.366	1.41529	0.195427	7.24205	4.41963e-13	2.49813e-11	17	TSPOAP1	58301228	58328795	TSPO associated protein 1 [Source:HGNC Symbol;Acc:HGNC:16831]	no	no	no	no
ENSG00000005436	450.507	-0.0283071	0.186471	-0.151805	0.879341	0.940446	2	GCFC2	75652000	75710985	GC-rich sequence DNA-binding factor 2 [Source:HGNC Symbol;Acc:HGNC:1317]	no	no	no	no
ENSG00000005448	515.484	0.237511	0.128308	1.85111	0.0641537	0.193209	2	WDR54	74421678	74425755	WD repeat domain 54 [Source:HGNC Symbol;Acc:HGNC:25770]	no	no	no	no
ENSG00000005469	687.685	-0.0940791	0.114079	-0.824683	0.409552	0.635478	7	CROT	87345664	87399794	carnitine O-octanoyltransferase [Source:HGNC Symbol;Acc:HGNC:2366]	no	no	no	no
ENSG00000005471	147.569	2.58953	0.384842	6.72881	1.71055e-11	7.66257e-10	7	ABCB4	87401696	87480435	ATP binding cassette subfamily B member 4 [Source:HGNC Symbol;Acc:HGNC:45]	no	no	no	no
ENSG00000005483	3222.91	-0.0378658	0.084827	-0.446389	0.655317	0.812437	7	KMT2E	104940943	105115019	lysine methyltransferase 2E (inactive) [Source:HGNC Symbol;Acc:HGNC:18541]	no	no	no	no
ENSG00000005486	1500.88	-0.395471	0.1657	-2.38667	0.0170019	0.0715156	7	RHBDD2	75842602	75888926	rhomboid domain containing 2 [Source:HGNC Symbol;Acc:HGNC:23082]	no	no	no	no
ENSG00000005700	4109.51	-0.0362004	0.110197	-0.328506	0.742529	0.865331	6	IBTK	82169986	82247754	inhibitor of Bruton tyrosine kinase [Source:HGNC Symbol;Acc:HGNC:17853]	no	no	no	no
ENSG00000005801	704.979	0.0898934	0.132344	0.679238	0.496987	0.705238	11	ZNF195	3339261	3379222	zinc finger protein 195 [Source:HGNC Symbol;Acc:HGNC:12986]	no	no	no	no
ENSG00000005810	3784.13	-1.09919	0.203497	-5.40152	6.60784e-08	1.46015e-06	13	MYCBP2	77042474	77327094	MYC binding protein 2 [Source:HGNC Symbol;Acc:HGNC:23386]	no	no	no	no
ENSG00000005812	2190.15	-0.350276	0.181487	-1.93003	0.0536027	0.169629	13	FBXL3	76992598	77027195	F-box and leucine rich repeat protein 3 [Source:HGNC Symbol;Acc:HGNC:13599]	no	no	no	no
ENSG00000005882	725.809	-0.026954	0.194766	-0.138391	0.889931	0.946567	17	PDK2	50094737	50112152	pyruvate dehydrogenase kinase 2 [Source:HGNC Symbol;Acc:HGNC:8810]	no	no	no	no
ENSG00000005884	9919.75	0.191543	0.190814	1.00382	0.315465	0.547714	17	ITGA3	50055968	50090481	integrin subunit alpha 3 [Source:HGNC Symbol;Acc:HGNC:6139]	no	no	no	no
ENSG00000005889	1475	-0.0693624	0.116659	-0.594573	0.552129	0.744829	X	ZFX	24149173	24216255	zinc finger protein X-linked [Source:HGNC Symbol;Acc:HGNC:12869]	no	yes	no	no
ENSG00000005893	10083.9	-0.340056	0.140561	-2.41928	0.0155514	0.0667358	X	LAMP2	120426148	120469365	lysosomal associated membrane protein 2 [Source:HGNC Symbol;Acc:HGNC:6501]	no	no	no	yes
ENSG00000006007	2536.12	-0.396078	0.134057	-2.95454	0.00313135	0.0189	16	GDE1	19501693	19522123	glycerophosphodiester phosphodiesterase 1 [Source:HGNC Symbol;Acc:HGNC:29644]	no	no	no	no
ENSG00000006015	665.525	-0.188422	0.20029	-0.940746	0.346835	0.578552	19	REX1BD	18588685	18592337	required for excision 1-B domain containing [Source:HGNC Symbol;Acc:HGNC:26098]	no	no	no	no
ENSG00000006016	1313.41	-1.15826	0.634428	-1.82568	0.0678991	0.201177	19	CRLF1	18572220	18607741	cytokine receptor like factor 1 [Source:HGNC Symbol;Acc:HGNC:2364]	no	no	no	no
ENSG00000006025	573.017	0.714432	0.139301	5.12868	2.91778e-07	5.78723e-06	17	OSBPL7	47807372	47821834	oxysterol binding protein like 7 [Source:HGNC Symbol;Acc:HGNC:16387]	no	no	no	no
ENSG00000006042	3452.48	-0.115637	0.178576	-0.647554	0.517273	0.719632	17	TMEM98	32927910	32945106	transmembrane protein 98 [Source:HGNC Symbol;Acc:HGNC:24529]	no	no	no	no
ENSG00000006062	520.651	0.125552	0.124877	1.00541	0.3147	0.546781	17	MAP3K14	45263119	45317029	mitogen-activated protein kinase kinase kinase 14 [Source:HGNC Symbol;Acc:HGNC:6853]	no	no	no	no
ENSG00000006118	783.716	0.690922	0.232597	2.97047	0.00297346	0.0181299	11	TMEM132A	60924460	60937159	transmembrane protein 132A [Source:HGNC Symbol;Acc:HGNC:31092]	no	no	no	no
ENSG00000006125	11625.6	-0.149505	0.141405	-1.05728	0.290383	0.520602	17	AP2B1	35578046	35726413	adaptor related protein complex 2 subunit beta 1 [Source:HGNC Symbol;Acc:HGNC:563]	no	no	no	no
ENSG00000006194	1154.79	0.0415622	0.0599298	0.693516	0.487986	0.698032	16	ZNF263	3283283	3301401	zinc finger protein 263 [Source:HGNC Symbol;Acc:HGNC:13056]	no	no	no	no
ENSG00000006282	3362.29	-0.654929	0.139422	-4.69745	2.6343e-06	4.14997e-05	17	SPATA20	50543058	50555852	spermatogenesis associated 20 [Source:HGNC Symbol;Acc:HGNC:26125]	no	no	no	no
ENSG00000006283	53.8369	-0.489495	0.450559	-1.08642	0.277295	0.507068	17	CACNA1G	50560715	50627474	calcium voltage-gated channel subunit alpha1 G [Source:HGNC Symbol;Acc:HGNC:1394]	no	no	no	no
ENSG00000006327	7498.55	-0.147461	0.153923	-0.958019	0.338053	0.569403	16	TNFRSF12A	3018445	3022383	TNF receptor superfamily member 12A [Source:HGNC Symbol;Acc:HGNC:18152]	no	no	no	no
ENSG00000006451	4045.47	-0.0117667	0.176105	-0.0668167	0.946728	0.976077	7	RALA	39623565	39708120	RAS like proto-oncogene A [Source:HGNC Symbol;Acc:HGNC:9839]	no	no	no	no
ENSG00000006453	642.609	-0.0183228	0.247242	-0.0741086	0.940924	0.97337	7	BAIAP2L1	98291650	98401090	BAR/IMD domain containing adaptor protein 2 like 1 [Source:HGNC Symbol;Acc:HGNC:21649]	no	no	no	no
ENSG00000006459	802.607	-0.11215	0.195896	-0.572497	0.566985	0.754796	7	KDM7A	140084746	140176983	lysine demethylase 7A [Source:HGNC Symbol;Acc:HGNC:22224]	no	no	no	no
ENSG00000006468	694.211	0.994684	0.369472	2.69218	0.00709872	0.0363633	7	ETV1	13891229	13991425	ETS variant transcription factor 1 [Source:HGNC Symbol;Acc:HGNC:3490]	no	no	no	no
ENSG00000006530	908.689	0.026554	0.140229	0.189362	0.849809	0.924093	7	AGK	141551278	141655244	acylglycerol kinase [Source:HGNC Symbol;Acc:HGNC:21869]	no	no	no	no
ENSG00000006534	1923.66	-0.893285	0.18417	-4.85033	1.23254e-06	2.11681e-05	11	ALDH3B1	68008578	68029282	aldehyde dehydrogenase 3 family member B1 [Source:HGNC Symbol;Acc:HGNC:410]	no	no	no	no
ENSG00000006576	2965.05	-0.263887	0.191378	-1.37887	0.167933	0.368552	7	PHTF2	77798773	77957503	putative homeodomain transcription factor 2 [Source:HGNC Symbol;Acc:HGNC:13411]	no	no	no	no
ENSG00000006606	155.903	-0.17064	0.343936	-0.496139	0.619797	0.789202	7	CCL26	75769533	75789896	C-C motif chemokine ligand 26 [Source:HGNC Symbol;Acc:HGNC:10625]	no	no	no	no
ENSG00000006607	2539.95	-0.334401	0.14487	-2.30829	0.0209828	0.0838168	2	FARP2	241356285	241494841	FERM, ARH/RhoGEF and pleckstrin domain protein 2 [Source:HGNC Symbol;Acc:HGNC:16460]	no	no	no	no
ENSG00000006625	366.803	-0.160481	0.204902	-0.783208	0.433505	0.655709	7	GGCT	30496621	30504841	gamma-glutamylcyclotransferase [Source:HGNC Symbol;Acc:HGNC:21705]	no	no	no	no
ENSG00000006634	577.32	-0.266803	0.21625	-1.23377	0.217289	0.436794	7	DBF4	87876216	87909553	DBF4 zinc finger [Source:HGNC Symbol;Acc:HGNC:17364]	no	no	no	no
ENSG00000006638	203.57	-0.32718	0.147458	-2.2188	0.0265	0.0999728	19	TBXA2R	3594507	3606875	thromboxane A2 receptor [Source:HGNC Symbol;Acc:HGNC:11608]	no	no	no	no
ENSG00000006652	393.528	-0.0815685	0.150903	-0.540535	0.588828	0.769504	7	IFRD1	112422887	112481017	interferon related developmental regulator 1 [Source:HGNC Symbol;Acc:HGNC:5456]	no	no	no	no
ENSG00000006695	512.076	-0.345652	0.183473	-1.88394	0.0595736	0.183443	17	COX10	14069490	14231736	cytochrome c oxidase assembly factor heme A:farnesyltransferase COX10 [Source:HGNC Symbol;Acc:HGNC:2260]	no	no	no	no
ENSG00000006704	893.888	-0.0256145	0.13844	-0.185022	0.853212	0.92583	7	GTF2IRD1	74453790	74602605	GTF2I repeat domain containing 1 [Source:HGNC Symbol;Acc:HGNC:4661]	no	no	no	no
ENSG00000006712	2384.67	0.0259954	0.0823741	0.315578	0.752323	0.870965	19	PAF1	39385629	39391154	PAF1 homolog, Paf1/RNA polymerase II complex component [Source:HGNC Symbol;Acc:HGNC:25459]	no	no	no	no
ENSG00000006715	2671.97	-0.222845	0.169808	-1.31233	0.189408	0.399759	7	VPS41	38722974	38932394	VPS41 subunit of HOPS complex [Source:HGNC Symbol;Acc:HGNC:12713]	no	no	no	no
ENSG00000006740	199.477	-0.942561	0.267119	-3.52862	0.000417732	0.00356317	17	ARHGAP44	12789498	12991643	Rho GTPase activating protein 44 [Source:HGNC Symbol;Acc:HGNC:29096]	no	no	no	no
ENSG00000006744	2754.67	-0.151587	0.168539	-0.899413	0.368433	0.598863	17	ELAC2	12991612	13018065	elaC ribonuclease Z 2 [Source:HGNC Symbol;Acc:HGNC:14198]	no	no	no	no
ENSG00000006747	459.949	-1.88265	0.53457	-3.5218	0.000428619	0.00364659	7	SCIN	12570577	12660182	scinderin [Source:HGNC Symbol;Acc:HGNC:21695]	no	no	no	no
ENSG00000006756	694.267	-0.590033	0.167982	-3.51247	0.000443954	0.00375763	X	ARSD	2903972	2929349	arylsulfatase D [Source:HGNC Symbol;Acc:HGNC:717]	no	yes	no	no
ENSG00000006757	253.665	0.0783143	0.164965	0.474731	0.634978	0.799057	X	PNPLA4	7898247	7927739	patatin like phospholipase domain containing 4 [Source:HGNC Symbol;Acc:HGNC:24887]	no	yes	no	no
ENSG00000006831	2293.59	-0.175129	0.179821	-0.973909	0.330101	0.561563	12	ADIPOR2	1688574	1788674	adiponectin receptor 2 [Source:HGNC Symbol;Acc:HGNC:24041]	no	no	no	no
ENSG00000007047	1792.77	0.217281	0.168514	1.28939	0.197263	0.410743	19	MARK4	45079288	45305284	microtubule affinity regulating kinase 4 [Source:HGNC Symbol;Acc:HGNC:13538]	no	no	no	no
ENSG00000007080	1773.3	0.0305533	0.127419	0.239787	0.810496	0.901007	19	CCDC124	17933015	17943991	coiled-coil domain containing 124 [Source:HGNC Symbol;Acc:HGNC:25171]	no	no	no	no
ENSG00000007168	9020.69	-0.109866	0.138415	-0.793742	0.427345	0.650577	17	PAFAH1B1	2593210	2685615	platelet activating factor acetylhydrolase 1b regulatory subunit 1 [Source:HGNC Symbol;Acc:HGNC:8574]	no	no	no	no
ENSG00000007202	6660.66	-0.410055	0.111618	-3.67373	0.000239033	0.00220453	17	BLTP2	28614446	28645454	bridge-like lipid transfer protein family member 2 [Source:HGNC Symbol;Acc:HGNC:28960]	no	no	no	no
ENSG00000007237	1379.69	-0.330551	0.301155	-1.09761	0.272373	0.50156	17	GAS7	9910606	10198606	growth arrest specific 7 [Source:HGNC Symbol;Acc:HGNC:4169]	no	no	no	no
ENSG00000007255	178.795	-0.25253	0.241993	-1.04354	0.296699	0.526372	19	TRAPPC6A	45162928	45178237	trafficking protein particle complex subunit 6A [Source:HGNC Symbol;Acc:HGNC:23069]	no	no	no	no
ENSG00000007341	524.586	-0.181298	0.164683	-1.10089	0.270946	0.49963	1	ST7L	112523514	112620825	suppression of tumorigenicity 7 like [Source:HGNC Symbol;Acc:HGNC:18441]	no	no	no	no
ENSG00000007372	68.3586	4.56026	0.831434	5.48482	4.13892e-08	9.61368e-07	11	PAX6	31784779	31817961	paired box 6 [Source:HGNC Symbol;Acc:HGNC:8620]	no	no	no	no
ENSG00000007376	612.592	-0.0862361	0.141292	-0.610337	0.541638	0.7373	16	RPUSD1	784974	788397	RNA pseudouridine synthase domain containing 1 [Source:HGNC Symbol;Acc:HGNC:14173]	no	no	no	no
ENSG00000007384	2966.76	-0.081565	0.161515	-0.504999	0.61356	0.785605	16	RHBDF1	58059	76355	rhomboid 5 homolog 1 [Source:HGNC Symbol;Acc:HGNC:20561]	no	no	no	no
ENSG00000007392	1978.51	0.328048	0.100849	3.25284	0.00114256	0.00819135	16	LUC7L	188969	229463	LUC7 like [Source:HGNC Symbol;Acc:HGNC:6723]	no	no	no	no
ENSG00000007520	1413.11	-0.293111	0.147565	-1.98632	0.0469976	0.154431	16	TSR3	1349240	1351878	TSR3 ribosome maturation factor [Source:HGNC Symbol;Acc:HGNC:14175]	no	no	no	no
ENSG00000007541	978.596	-0.124644	0.13773	-0.904984	0.365474	0.596073	16	PIGQ	566995	584109	phosphatidylinositol glycan anchor biosynthesis class Q [Source:HGNC Symbol;Acc:HGNC:14135]	no	no	no	no
ENSG00000007545	596.131	0.0732445	0.112338	0.652001	0.514401	0.717502	16	CRAMP1	1612337	1677908	cramped chromatin regulator homolog 1 [Source:HGNC Symbol;Acc:HGNC:14122]	no	no	no	no
ENSG00000007866	3458.65	0.501755	0.248287	2.02086	0.0432939	0.145158	6	TEAD3	35473597	35497079	TEA domain transcription factor 3 [Source:HGNC Symbol;Acc:HGNC:11716]	no	no	no	no
ENSG00000007923	1744.51	-0.135881	0.137408	-0.988883	0.32272	0.555575	1	DNAJC11	6634168	6701924	DnaJ heat shock protein family (Hsp40) member C11 [Source:HGNC Symbol;Acc:HGNC:25570]	no	no	no	no
ENSG00000007944	283.506	0.278149	0.246252	1.12953	0.258674	0.48536	6	MYLIP	16129086	16148248	myosin regulatory light chain interacting protein [Source:HGNC Symbol;Acc:HGNC:21155]	no	no	no	no
ENSG00000007968	52.7175	-0.779584	0.267008	-2.9197	0.00350371	0.0206923	1	E2F2	23506438	23531233	E2F transcription factor 2 [Source:HGNC Symbol;Acc:HGNC:3114]	no	no	no	no
ENSG00000008018	4111.93	-0.0143578	0.142829	-0.100525	0.919928	0.962172	6	PSMB1	170535120	170553307	proteasome 20S subunit beta 1 [Source:HGNC Symbol;Acc:HGNC:9537]	no	no	no	no
ENSG00000008056	78.1936	1.71741	0.29577	5.80657	6.37659e-09	1.76058e-07	X	SYN1	47571901	47619857	synapsin I [Source:HGNC Symbol;Acc:HGNC:11494]	no	no	no	yes
ENSG00000008083	756.301	0.456485	0.103895	4.39369	1.11441e-05	0.000149307	6	JARID2	15246069	15522042	jumonji and AT-rich interaction domain containing 2 [Source:HGNC Symbol;Acc:HGNC:6196]	no	no	no	no
ENSG00000008086	843.877	0.197608	0.199697	0.98954	0.322399	0.55525	X	CDKL5	18425583	18653629	cyclin dependent kinase like 5 [Source:HGNC Symbol;Acc:HGNC:11411]	no	no	no	yes
ENSG00000008118	54.0886	2.79468	0.459409	6.0832	1.17804e-09	3.7566e-08	1	CAMK1G	209583714	209613939	calcium/calmodulin dependent protein kinase IG [Source:HGNC Symbol;Acc:HGNC:14585]	no	no	no	no
ENSG00000008128	83.7815	-0.451176	0.253157	-1.7822	0.0747171	0.215589	1	CDK11A	1702379	1724357	cyclin dependent kinase 11A [Source:HGNC Symbol;Acc:HGNC:1730]	no	no	no	no
ENSG00000008130	2192.12	-0.0637409	0.0713809	-0.892968	0.371874	0.601807	1	NADK	1751232	1780457	NAD kinase [Source:HGNC Symbol;Acc:HGNC:29831]	no	no	no	no
ENSG00000008256	8126.67	-0.439333	0.216244	-2.03165	0.0421886	0.142504	7	CYTH3	6161776	6272644	cytohesin 3 [Source:HGNC Symbol;Acc:HGNC:9504]	no	no	no	no
ENSG00000008282	4123.53	-0.268896	0.151973	-1.76936	0.0768335	0.219978	7	SYPL1	106090505	106112589	synaptophysin like 1 [Source:HGNC Symbol;Acc:HGNC:11507]	no	no	no	no
ENSG00000008283	1634.43	-0.445761	0.171455	-2.59988	0.00932574	0.0453043	17	CYB561	63432304	63446354	cytochrome b561 [Source:HGNC Symbol;Acc:HGNC:2571]	no	no	no	no
ENSG00000008294	9333.14	-0.428151	0.182464	-2.34649	0.0189512	0.0778259	17	SPAG9	50962174	51120868	sperm associated antigen 9 [Source:HGNC Symbol;Acc:HGNC:14524]	no	no	no	no
ENSG00000008300	135.677	0.527146	0.192915	2.73254	0.00628489	0.03282	3	CELSR3	48636463	48662886	cadherin EGF LAG seven-pass G-type receptor 3 [Source:HGNC Symbol;Acc:HGNC:3230]	no	no	no	no
ENSG00000008311	944.2	-0.386273	0.173403	-2.22761	0.0259068	0.0982717	7	AASS	122064583	122144308	aminoadipate-semialdehyde synthase [Source:HGNC Symbol;Acc:HGNC:17366]	no	no	no	no
ENSG00000008324	295.116	0.0554399	0.190078	0.291668	0.77054	0.880478	3	SS18L2	42581840	42596934	SS18 like 2 [Source:HGNC Symbol;Acc:HGNC:15593]	no	no	no	no
ENSG00000008382	189.668	-0.0392332	0.207809	-0.188794	0.850254	0.924093	19	MPND	4343527	4360086	MPN domain containing [Source:HGNC Symbol;Acc:HGNC:25934]	no	no	no	no
ENSG00000008394	3201.66	-1.2861	0.264004	-4.87152	1.10743e-06	1.9369e-05	12	MGST1	16347142	16609259	microsomal glutathione S-transferase 1 [Source:HGNC Symbol;Acc:HGNC:7061]	no	no	no	no
ENSG00000008405	966.356	-0.0895971	0.200532	-0.446796	0.655022	0.812207	12	CRY1	106991364	107093549	cryptochrome circadian regulator 1 [Source:HGNC Symbol;Acc:HGNC:2384]	no	no	no	no
ENSG00000008441	16090.5	0.0996827	0.189014	0.527383	0.597928	0.775141	19	NFIX	12995475	13098796	nuclear factor I X [Source:HGNC Symbol;Acc:HGNC:7788]	no	no	no	no
ENSG00000008513	4823.28	-0.0388553	0.138009	-0.281542	0.778295	0.884165	8	ST3GAL1	133454848	133571940	ST3 beta-galactoside alpha-2,3-sialyltransferase 1 [Source:HGNC Symbol;Acc:HGNC:10862]	no	no	no	no
ENSG00000008517	67.8753	3.21723	0.546652	5.88534	3.97238e-09	1.14729e-07	16	IL32	3065297	3082192	interleukin 32 [Source:HGNC Symbol;Acc:HGNC:16830]	no	no	no	no
ENSG00000008710	9817.15	-0.420086	0.203193	-2.06743	0.038694	0.133823	16	PKD1	2088708	2135898	polycystin 1, transient receptor potential channel interacting [Source:HGNC Symbol;Acc:HGNC:9008]	no	no	no	no
ENSG00000008838	2445.81	-0.102529	0.112254	-0.913365	0.36105	0.592267	17	MED24	40019097	40061215	mediator complex subunit 24 [Source:HGNC Symbol;Acc:HGNC:22963]	no	no	no	no
ENSG00000008853	873.871	-0.360422	0.150141	-2.40056	0.0163701	0.0695018	8	RHOBTB2	22987417	23020509	Rho related BTB domain containing 2 [Source:HGNC Symbol;Acc:HGNC:18756]	no	no	no	no
ENSG00000008869	1451.32	-0.0477028	0.105773	-0.450992	0.651995	0.810482	2	HEATR5B	36968383	37084372	HEAT repeat containing 5B [Source:HGNC Symbol;Acc:HGNC:29273]	no	no	no	no
ENSG00000008952	6417.22	-0.126588	0.156131	-0.81078	0.417492	0.642333	3	SEC62	169966635	169998373	SEC62 homolog, preprotein translocation factor [Source:HGNC Symbol;Acc:HGNC:11846]	no	no	no	no
ENSG00000008988	13926.9	0.293174	0.156138	1.87766	0.0604272	0.185291	8	RPS20	56067254	56074510	ribosomal protein S20 [Source:HGNC Symbol;Acc:HGNC:10405]	no	no	no	no
ENSG00000009307	24091.1	-0.174453	0.163401	-1.06764	0.285685	0.516327	1	CSDE1	114716913	114758676	cold shock domain containing E1 [Source:HGNC Symbol;Acc:HGNC:29905]	no	no	no	no
ENSG00000009335	6333.24	-0.25851	0.156081	-1.65625	0.0976708	0.25835	7	UBE3C	157138916	157269370	ubiquitin protein ligase E3C [Source:HGNC Symbol;Acc:HGNC:16803]	no	no	no	no
ENSG00000009413	5507.52	0.0258635	0.22246	0.116261	0.907445	0.95606	6	REV3L	111299028	111483715	REV3 like, DNA directed polymerase zeta catalytic subunit [Source:HGNC Symbol;Acc:HGNC:9968]	no	no	no	no
ENSG00000009780	444.63	-0.327813	0.118075	-2.77631	0.00549801	0.0296393	1	FAM76A	27725961	27763116	family with sequence similarity 76 member A [Source:HGNC Symbol;Acc:HGNC:28530]	no	no	no	no
ENSG00000009830	1263.3	-0.0892429	0.107544	-0.829825	0.406638	0.633168	14	POMT2	77274956	77320883	protein O-mannosyltransferase 2 [Source:HGNC Symbol;Acc:HGNC:19743]	no	no	no	no
ENSG00000009844	2505.05	-0.16576	0.181235	-0.914615	0.360394	0.591671	6	VTA1	142147162	142224685	vesicle trafficking 1 [Source:HGNC Symbol;Acc:HGNC:20954]	no	no	no	no
ENSG00000009954	6329.82	-0.171042	0.159691	-1.07108	0.284134	0.514724	7	BAZ1B	73440406	73522293	bromodomain adjacent to zinc finger domain 1B [Source:HGNC Symbol;Acc:HGNC:961]	no	no	no	no
ENSG00000010017	2916.01	-0.196178	0.17081	-1.14851	0.250756	0.47677	6	RANBP9	13621498	13711835	RAN binding protein 9 [Source:HGNC Symbol;Acc:HGNC:13727]	no	no	no	no
ENSG00000010072	558.658	-0.0426699	0.187776	-0.227238	0.820239	0.90679	1	SPRTN	231337104	231355023	SprT-like N-terminal domain [Source:HGNC Symbol;Acc:HGNC:25356]	no	no	no	no
ENSG00000010165	1339.95	-0.224614	0.127535	-1.7612	0.0782052	0.222984	1	METTL13	171781660	171814023	methyltransferase 13, eEF1A lysine and N-terminal methyltransferase [Source:HGNC Symbol;Acc:HGNC:24248]	no	no	no	no
ENSG00000010219	606.731	-0.0391331	0.136381	-0.28694	0.774158	0.882054	12	DYRK4	4562208	4615302	dual specificity tyrosine phosphorylation regulated kinase 4 [Source:HGNC Symbol;Acc:HGNC:3095]	no	no	no	no
ENSG00000010244	6358.94	0.143763	0.145387	0.988824	0.322749	0.555575	17	ZNF207	32350132	32381885	zinc finger protein 207 [Source:HGNC Symbol;Acc:HGNC:12998]	no	no	no	no
ENSG00000010256	4339.18	0.0931377	0.158499	0.587622	0.556786	0.747971	3	UQCRC1	48599002	48610976	ubiquinol-cytochrome c reductase core protein 1 [Source:HGNC Symbol;Acc:HGNC:12585]	no	no	no	no
ENSG00000010270	1283.6	0.111021	0.200173	0.554627	0.57915	0.763139	7	STARD3NL	38178245	38230670	STARD3 N-terminal like [Source:HGNC Symbol;Acc:HGNC:19169]	no	no	no	no
ENSG00000010278	1373.75	0.584509	0.325877	1.79365	0.0728695	0.211246	12	CD9	6199715	6238271	CD9 molecule [Source:HGNC Symbol;Acc:HGNC:1709]	no	no	no	no
ENSG00000010292	4317.59	0.144706	0.210833	0.686356	0.492489	0.701349	12	NCAPD2	6493356	6531955	non-SMC condensin I complex subunit D2 [Source:HGNC Symbol;Acc:HGNC:24305]	no	no	no	no
ENSG00000010295	2099.61	-0.398265	0.153062	-2.60199	0.00926842	0.0450924	12	IFFO1	6538961	6556073	intermediate filament family orphan 1 [Source:HGNC Symbol;Acc:HGNC:24970]	no	no	no	no
ENSG00000010310	79.2178	0.53523	0.297521	1.79896	0.0720247	0.20964	19	GIPR	45668221	45683722	gastric inhibitory polypeptide receptor [Source:HGNC Symbol;Acc:HGNC:4271]	no	no	no	no
ENSG00000010318	145.578	0.145808	0.128911	1.13107	0.258024	0.484761	3	PHF7	52410660	52423641	PHD finger protein 7 [Source:HGNC Symbol;Acc:HGNC:18458]	no	no	no	no
ENSG00000010322	5379.08	-0.108799	0.213641	-0.50926	0.61057	0.783438	3	NISCH	52455118	52493068	nischarin [Source:HGNC Symbol;Acc:HGNC:18006]	no	no	no	no
ENSG00000010361	272.605	0.307133	0.230702	1.3313	0.183091	0.391518	19	FUZ	49806866	49817376	fuzzy planar cell polarity protein [Source:HGNC Symbol;Acc:HGNC:26219]	no	no	no	no
ENSG00000010404	463.085	0.0426871	0.14678	0.290824	0.771186	0.880504	X	IDS	149476988	149521096	iduronate 2-sulfatase [Source:HGNC Symbol;Acc:HGNC:5389]	no	no	no	yes
ENSG00000010539	313.936	-0.236718	0.104116	-2.27359	0.0229907	0.0898211	16	ZNF200	3222325	3236221	zinc finger protein 200 [Source:HGNC Symbol;Acc:HGNC:12993]	no	no	no	no
ENSG00000010626	201.492	0.220966	0.20066	1.1012	0.270811	0.499565	12	LRRC23	6873569	6914241	leucine rich repeat containing 23 [Source:HGNC Symbol;Acc:HGNC:19138]	no	no	no	no
ENSG00000010704	1017.04	-0.380047	0.111332	-3.41363	0.000641045	0.00507671	6	HFE	26087281	26098343	homeostatic iron regulator [Source:HGNC Symbol;Acc:HGNC:4886]	no	no	no	no
ENSG00000010803	1730.74	-0.0286459	0.131042	-0.2186	0.826961	0.910232	1	SCMH1	41027202	41242306	Scm polycomb group protein homolog 1 [Source:HGNC Symbol;Acc:HGNC:19003]	no	no	no	no
ENSG00000010810	3348.99	-0.228121	0.145337	-1.56961	0.116507	0.289236	6	FYN	111660332	111873452	FYN proto-oncogene, Src family tyrosine kinase [Source:HGNC Symbol;Acc:HGNC:4037]	no	no	no	no
ENSG00000010818	3334.7	0.086802	0.0919212	0.944308	0.345012	0.577116	6	HIVEP2	142751469	142956698	HIVEP zinc finger 2 [Source:HGNC Symbol;Acc:HGNC:4921]	no	no	no	no
ENSG00000011007	2824.8	-0.236825	0.14962	-1.58284	0.113459	0.28462	1	ELOA	23743448	23762059	elongin A [Source:HGNC Symbol;Acc:HGNC:11620]	no	no	no	no
ENSG00000011009	1424.42	-0.101838	0.15572	-0.65398	0.513124	0.716545	1	LYPLA2	23791145	23795539	lysophospholipase 2 [Source:HGNC Symbol;Acc:HGNC:6738]	no	no	no	no
ENSG00000011021	1412.13	0.18646	0.193309	0.964571	0.33476	0.566096	1	CLCN6	11806096	11848079	chloride voltage-gated channel 6 [Source:HGNC Symbol;Acc:HGNC:2024]	no	no	no	no
ENSG00000011028	42436.2	-0.019907	0.159663	-0.124682	0.900776	0.952792	17	MRC2	62627670	62693597	mannose receptor C type 2 [Source:HGNC Symbol;Acc:HGNC:16875]	no	no	no	no
ENSG00000011105	1270.8	0.205102	0.184078	1.11421	0.265188	0.492252	12	TSPAN9	3077355	3286564	tetraspanin 9 [Source:HGNC Symbol;Acc:HGNC:21640]	no	no	no	no
ENSG00000011114	1811.75	-0.216767	0.16698	-1.29816	0.194232	0.406488	14	BTBD7	93237550	93333092	BTB domain containing 7 [Source:HGNC Symbol;Acc:HGNC:18269]	no	no	no	no
ENSG00000011132	450.155	0.103571	0.174062	0.595026	0.551826	0.744577	19	APBA3	3750772	3761692	amyloid beta precursor protein binding family A member 3 [Source:HGNC Symbol;Acc:HGNC:580]	no	no	no	no
ENSG00000011143	390.784	-0.00444099	0.187952	-0.0236283	0.981149	0.990144	17	MKS1	58205441	58219605	MKS transition zone complex subunit 1 [Source:HGNC Symbol;Acc:HGNC:7121]	no	no	no	no
ENSG00000011198	1147.4	-0.105903	0.177047	-0.59816	0.549733	0.742952	3	ABHD5	43690108	43734371	abhydrolase domain containing 5, lysophosphatidic acid acyltransferase [Source:HGNC Symbol;Acc:HGNC:21396]	no	no	no	no
ENSG00000011201	262.809	8.58467	1.8855	4.553	5.28868e-06	7.78233e-05	X	ANOS1	8528874	8732137	anosmin 1 [Source:HGNC Symbol;Acc:HGNC:6211]	no	yes	no	no
ENSG00000011243	1198.86	0.069666	0.204828	0.34012	0.733766	0.860372	19	AKAP8L	15380050	15419141	A-kinase anchoring protein 8 like [Source:HGNC Symbol;Acc:HGNC:29857]	no	no	no	no
ENSG00000011258	591.494	0.254021	0.179911	1.41193	0.157971	0.355	17	MBTD1	51177425	51260163	mbt domain containing 1 [Source:HGNC Symbol;Acc:HGNC:19866]	no	no	no	no
ENSG00000011260	1040.51	-0.228817	0.171964	-1.33061	0.183318	0.391614	17	UTP18	51260546	51297936	UTP18 small subunit processome component [Source:HGNC Symbol;Acc:HGNC:24274]	no	no	no	no
ENSG00000011275	3142.63	0.166633	0.147048	1.13319	0.257133	0.483846	7	RNF216	5620047	5781696	ring finger protein 216 [Source:HGNC Symbol;Acc:HGNC:21698]	no	no	no	no
ENSG00000011295	1052.82	-0.226669	0.196559	-1.15319	0.248834	0.474673	17	TTC19	15999784	16045015	tetratricopeptide repeat domain 19 [Source:HGNC Symbol;Acc:HGNC:26006]	no	no	no	no
ENSG00000011304	12037.4	-0.00240053	0.101399	-0.0236742	0.981112	0.990144	19	PTBP1	797075	812327	polypyrimidine tract binding protein 1 [Source:HGNC Symbol;Acc:HGNC:9583]	no	no	no	no
ENSG00000011332	118.074	-0.347042	0.217114	-1.59843	0.109947	0.279106	19	DPF1	38211006	38229714	double PHD fingers 1 [Source:HGNC Symbol;Acc:HGNC:20225]	no	no	no	no
ENSG00000011347	36.3197	2.22933	0.490141	4.54836	5.40668e-06	7.91177e-05	11	SYT7	61513714	61581148	synaptotagmin 7 [Source:HGNC Symbol;Acc:HGNC:11514]	no	no	no	no
ENSG00000011376	1112.15	-0.311812	0.164814	-1.8919	0.0585045	0.180967	3	LARS2	45388561	45554726	leucyl-tRNA synthetase 2, mitochondrial [Source:HGNC Symbol;Acc:HGNC:17095]	no	no	no	no
ENSG00000011405	3116.28	-0.10901	0.0946337	-1.15192	0.249354	0.475062	11	PIK3C2A	17077730	17207986	phosphatidylinositol-4-phosphate 3-kinase catalytic subunit type 2 alpha [Source:HGNC Symbol;Acc:HGNC:8971]	no	no	no	no
ENSG00000011422	3272.66	0.444295	0.179454	2.47582	0.0132931	0.0591853	19	PLAUR	43646095	43670547	plasminogen activator, urokinase receptor [Source:HGNC Symbol;Acc:HGNC:9053]	no	no	no	no
ENSG00000011426	5898.24	-0.194245	0.271581	-0.715238	0.474462	0.687077	7	ANLN	36389821	36453791	anillin, actin binding protein [Source:HGNC Symbol;Acc:HGNC:14082]	no	no	no	no
ENSG00000011451	4178.52	-0.0699704	0.14413	-0.485468	0.627344	0.795012	19	WIZ	15419978	15449956	WIZ zinc finger [Source:HGNC Symbol;Acc:HGNC:30917]	no	no	no	no
ENSG00000011454	6909.83	-0.0821743	0.305117	-0.269321	0.787683	0.888775	9	RABGAP1	122940833	123104866	RAB GTPase activating protein 1 [Source:HGNC Symbol;Acc:HGNC:17155]	no	no	no	no
ENSG00000011465	51822.7	-0.586378	0.498059	-1.17733	0.239065	0.463391	12	DCN	91140484	91183217	decorin [Source:HGNC Symbol;Acc:HGNC:2705]	no	no	no	no
ENSG00000011478	488.228	-0.0207863	0.118221	-0.175826	0.860431	0.929186	19	QPCTL	45692403	45703989	glutaminyl-peptide cyclotransferase like [Source:HGNC Symbol;Acc:HGNC:25952]	no	no	no	no
ENSG00000011485	3032.85	-0.121587	0.156791	-0.775469	0.438063	0.658997	19	PPP5C	46347087	46392981	protein phosphatase 5 catalytic subunit [Source:HGNC Symbol;Acc:HGNC:9322]	no	no	no	no
ENSG00000011523	810.6	-0.0586144	0.185988	-0.315152	0.752646	0.871054	2	CEP68	65056354	65087004	centrosomal protein 68 [Source:HGNC Symbol;Acc:HGNC:29076]	no	no	no	no
ENSG00000011566	1523.19	-0.158664	0.116464	-1.36235	0.173087	0.376661	2	MAP4K3	39249266	39437301	mitogen-activated protein kinase kinase kinase kinase 3 [Source:HGNC Symbol;Acc:HGNC:6865]	no	no	no	no
ENSG00000011638	646.785	-0.303152	0.194618	-1.55768	0.11931	0.293913	16	LDAF1	21158377	21180616	lipid droplet assembly factor 1 [Source:HGNC Symbol;Acc:HGNC:30136]	no	no	no	no
ENSG00000012048	743.569	-0.5471	0.231196	-2.3664	0.0179623	0.0745451	17	BRCA1	43044295	43170245	BRCA1 DNA repair associated [Source:HGNC Symbol;Acc:HGNC:1100]	no	no	no	no
ENSG00000012061	2525.85	0.199465	0.144521	1.38017	0.167533	0.367857	19	ERCC1	45407334	45478828	ERCC excision repair 1, endonuclease non-catalytic subunit [Source:HGNC Symbol;Acc:HGNC:3433]	no	no	no	no
ENSG00000012171	809.385	0.718134	0.259206	2.77051	0.00559689	0.0300249	3	SEMA3B	50267558	50277546	semaphorin 3B [Source:HGNC Symbol;Acc:HGNC:10724]	no	no	no	no
ENSG00000012174	1836.06	-0.182172	0.139777	-1.3033	0.192471	0.403766	X	MBTPS2	21839617	21885423	membrane bound transcription factor peptidase, site 2 [Source:HGNC Symbol;Acc:HGNC:15455]	no	no	no	yes
ENSG00000012211	384.29	-0.0361199	0.17659	-0.204541	0.837931	0.917031	X	PRICKLE3	49174802	49186528	prickle planar cell polarity protein 3 [Source:HGNC Symbol;Acc:HGNC:6645]	no	no	no	yes
ENSG00000012232	3261.04	-0.180339	0.155609	-1.15893	0.246487	0.472214	8	EXTL3	28600469	28756561	exostosin like glycosyltransferase 3 [Source:HGNC Symbol;Acc:HGNC:3518]	no	no	no	no
ENSG00000012660	4891.16	-0.340284	0.12666	-2.6866	0.00721843	0.0369191	6	ELOVL5	53267398	53349179	ELOVL fatty acid elongase 5 [Source:HGNC Symbol;Acc:HGNC:21308]	no	no	no	no
ENSG00000012817	3485.9	1.17662	0.127863	9.2022	3.50701e-20	5.13193e-18	Y	KDM5D	19703865	19744939	lysine demethylase 5D [Source:HGNC Symbol;Acc:HGNC:11115]	no	no	no	no
ENSG00000012822	6163.97	0.145416	0.2221	0.654731	0.512641	0.716545	12	CALCOCO1	53708517	53727745	calcium binding and coiled-coil domain 1 [Source:HGNC Symbol;Acc:HGNC:29306]	no	no	no	no
ENSG00000012963	989.309	-0.196959	0.182135	-1.08139	0.279524	0.509939	14	UBR7	93207241	93229215	ubiquitin protein ligase E3 component n-recognin 7 [Source:HGNC Symbol;Acc:HGNC:20344]	no	no	no	no
ENSG00000012983	5940.07	-0.29073	0.101713	-2.85833	0.00425873	0.0241652	14	MAP4K5	50418501	50561126	mitogen-activated protein kinase kinase kinase kinase 5 [Source:HGNC Symbol;Acc:HGNC:6867]	no	no	no	no
ENSG00000013016	2427.22	0.738175	0.190322	3.87855	0.00010508	0.00108252	2	EHD3	31234152	31269451	EH domain containing 3 [Source:HGNC Symbol;Acc:HGNC:3244]	no	no	no	no
ENSG00000013275	2803.21	0.0832754	0.134118	0.620911	0.534658	0.732097	19	PSMC4	39971165	39981764	proteasome 26S subunit, ATPase 4 [Source:HGNC Symbol;Acc:HGNC:9551]	no	no	no	no
ENSG00000013288	4592.62	-0.589169	0.169023	-3.48573	0.000490801	0.00405766	4	MAN2B2	6575189	6623362	mannosidase alpha class 2B member 2 [Source:HGNC Symbol;Acc:HGNC:29623]	no	no	no	no
ENSG00000013297	4972.13	0.103709	0.368586	0.281371	0.778426	0.884165	3	CLDN11	170418868	170454733	claudin 11 [Source:HGNC Symbol;Acc:HGNC:8514]	no	no	no	no
ENSG00000013306	3249.85	-0.29264	0.161981	-1.80663	0.0708194	0.207173	17	SLC25A39	44319625	44324870	solute carrier family 25 member 39 [Source:HGNC Symbol;Acc:HGNC:24279]	no	no	no	no
ENSG00000013364	11218.7	-0.216029	0.136723	-1.58006	0.114094	0.285669	16	MVP	29820394	29848039	major vault protein [Source:HGNC Symbol;Acc:HGNC:7531]	no	no	no	no
ENSG00000013374	2332.24	0.0373677	0.126923	0.294412	0.768443	0.878888	7	NUB1	151341772	151378449	negative regulator of ubiquitin like proteins 1 [Source:HGNC Symbol;Acc:HGNC:17623]	no	no	no	no
ENSG00000013375	4372.2	0.163097	0.0917074	1.77845	0.0753299	0.216756	6	PGM3	83147324	83193936	phosphoglucomutase 3 [Source:HGNC Symbol;Acc:HGNC:8907]	no	no	no	no
ENSG00000013392	365.185	0.316857	0.195253	1.6228	0.104631	0.270717	6	RWDD2A	83193357	83198935	RWD domain containing 2A [Source:HGNC Symbol;Acc:HGNC:21385]	no	no	no	no
ENSG00000013441	2457.65	-0.151929	0.169774	-0.894891	0.370846	0.601073	2	CLK1	200853009	200864691	CDC like kinase 1 [Source:HGNC Symbol;Acc:HGNC:2068]	no	no	no	no
ENSG00000013503	707.147	-0.453006	0.136328	-3.32291	0.000890838	0.00663593	12	POLR3B	106357748	106510198	RNA polymerase III subunit B [Source:HGNC Symbol;Acc:HGNC:30348]	no	no	no	no
ENSG00000013523	583.841	-0.218949	0.211194	-1.03672	0.299867	0.530382	14	ANGEL1	76786009	76826246	angel homolog 1 [Source:HGNC Symbol;Acc:HGNC:19961]	no	no	no	no
ENSG00000013561	2095.3	-0.17109	0.110977	-1.54168	0.123152	0.300177	5	RNF14	141958328	141990292	ring finger protein 14 [Source:HGNC Symbol;Acc:HGNC:10058]	no	no	no	no
ENSG00000013563	754.395	-0.25178	0.252832	-0.995839	0.319328	0.552345	X	DNASE1L1	154401236	154412112	deoxyribonuclease 1 like 1 [Source:HGNC Symbol;Acc:HGNC:2957]	no	no	no	yes
ENSG00000013573	953.179	-0.127959	0.168765	-0.75821	0.448325	0.667714	12	DDX11	31073860	31104799	DEAD/H-box helicase 11 [Source:HGNC Symbol;Acc:HGNC:2736]	no	no	no	no
ENSG00000013583	1620.28	-0.815873	0.207626	-3.92953	8.51127e-05	0.000898184	12	HEBP1	12974870	13000265	heme binding protein 1 [Source:HGNC Symbol;Acc:HGNC:17176]	no	no	no	no
ENSG00000013588	183.344	1.54374	0.193143	7.99275	1.31962e-15	1.01634e-13	12	GPRC5A	12891559	12917937	G protein-coupled receptor class C group 5 member A [Source:HGNC Symbol;Acc:HGNC:9836]	no	no	no	no
ENSG00000013619	2222.61	-0.7918	0.184275	-4.29683	1.73254e-05	0.000216111	X	MAMLD1	150361422	150514178	mastermind like domain containing 1 [Source:HGNC Symbol;Acc:HGNC:2568]	no	no	no	yes
ENSG00000013810	2347.1	-0.0312333	0.241949	-0.12909	0.897286	0.950705	4	TACC3	1712858	1745171	transforming acidic coiled-coil containing protein 3 [Source:HGNC Symbol;Acc:HGNC:11524]	no	no	no	no
ENSG00000014123	2224.05	-0.166048	0.118321	-1.40336	0.160509	0.35826	6	UFL1	96521595	96555276	UFM1 specific ligase 1 [Source:HGNC Symbol;Acc:HGNC:23039]	no	no	no	no
ENSG00000014138	121.6	-0.660191	0.210112	-3.14209	0.00167747	0.0112831	11	POLA2	65261913	65305959	DNA polymerase alpha 2, accessory subunit [Source:HGNC Symbol;Acc:HGNC:30073]	no	no	no	no
ENSG00000014164	743.841	-0.110343	0.172719	-0.638858	0.522915	0.723387	8	ZC3H3	143437659	143541447	zinc finger CCCH-type containing 3 [Source:HGNC Symbol;Acc:HGNC:28972]	no	no	no	no
ENSG00000014216	7599.27	-0.213498	0.135385	-1.57697	0.114803	0.286789	11	CAPN1	65180566	65212006	calpain 1 [Source:HGNC Symbol;Acc:HGNC:1476]	no	no	no	no
ENSG00000014641	4239.18	-0.248262	0.137351	-1.8075	0.0706844	0.20687	2	MDH1	63588609	63607197	malate dehydrogenase 1 [Source:HGNC Symbol;Acc:HGNC:6970]	no	no	no	no
ENSG00000014824	3166.16	-0.0582444	0.153893	-0.378473	0.705079	0.842411	4	SLC30A9	41990502	42090461	solute carrier family 30 member 9 [Source:HGNC Symbol;Acc:HGNC:1329]	no	no	no	no
ENSG00000014914	1221.78	0.207945	0.107099	1.94161	0.0521847	0.166673	1	MTMR11	149928651	149936879	myotubularin related protein 11 [Source:HGNC Symbol;Acc:HGNC:24307]	no	no	no	no
ENSG00000014919	750.287	-0.0746919	0.161315	-0.463019	0.64335	0.805564	10	COX15	99710868	99732127	cytochrome c oxidase assembly homolog COX15 [Source:HGNC Symbol;Acc:HGNC:2263]	no	no	no	no
ENSG00000015153	610.094	-0.207931	0.0987441	-2.10576	0.0352253	0.125146	12	YAF2	42157104	42238349	YY1 associated factor 2 [Source:HGNC Symbol;Acc:HGNC:17363]	no	no	no	no
ENSG00000015171	4619.2	-0.0936891	0.127557	-0.734485	0.462653	0.678253	10	ZMYND11	130088	254637	zinc finger MYND-type containing 11 [Source:HGNC Symbol;Acc:HGNC:16966]	no	no	no	no
ENSG00000015475	587.385	-0.0659744	0.115522	-0.571099	0.567933	0.755828	22	BID	17734138	17774770	BH3 interacting domain death agonist [Source:HGNC Symbol;Acc:HGNC:1050]	no	no	no	no
ENSG00000015479	102.525	0.115595	0.157551	0.7337	0.463132	0.678683	5	MATR3	139293674	139331677	matrin 3 [Source:HGNC Symbol;Acc:HGNC:6912]	no	no	no	no
ENSG00000015532	2193.85	-0.048622	0.186149	-0.261199	0.793939	0.891794	17	XYLT2	50346126	50363138	xylosyltransferase 2 [Source:HGNC Symbol;Acc:HGNC:15517]	no	no	no	no
ENSG00000015676	3423.41	-0.106594	0.175315	-0.608016	0.543177	0.738631	7	NUDCD3	44379119	44490658	NudC domain containing 3 [Source:HGNC Symbol;Acc:HGNC:22208]	no	no	no	no
ENSG00000016391	59.9174	1.2622	0.520334	2.42574	0.0152771	0.0658589	3	CHDH	53812335	53846419	choline dehydrogenase [Source:HGNC Symbol;Acc:HGNC:24288]	no	no	no	no
ENSG00000016402	26.3469	-2.62617	0.437383	-6.00428	1.9218e-09	5.88607e-08	6	IL20RA	136999971	137045180	interleukin 20 receptor subunit alpha [Source:HGNC Symbol;Acc:HGNC:6003]	no	no	no	no
ENSG00000016864	3851.12	0.0262624	0.13177	0.199304	0.842025	0.919021	3	GLT8D1	52694486	52706032	glycosyltransferase 8 domain containing 1 [Source:HGNC Symbol;Acc:HGNC:24870]	no	no	no	no
ENSG00000017260	7095.53	-0.280975	0.195372	-1.43816	0.15039	0.344761	3	ATP2C1	130850595	131016712	ATPase secretory pathway Ca2+ transporting 1 [Source:HGNC Symbol;Acc:HGNC:13211]	no	no	no	no
ENSG00000017483	2159.13	-0.16599	0.164668	-1.00803	0.31344	0.545672	X	SLC38A5	48458537	48470260	solute carrier family 38 member 5 [Source:HGNC Symbol;Acc:HGNC:18070]	no	no	no	yes
ENSG00000017797	4376.17	-0.213	0.15184	-1.40279	0.160678	0.358363	18	RALBP1	9475009	9538114	ralA binding protein 1 [Source:HGNC Symbol;Acc:HGNC:9841]	no	no	no	no
ENSG00000018189	2258.4	0.211084	0.185618	1.13719	0.255457	0.481863	4	RUFY3	70704204	70808619	RUN and FYVE domain containing 3 [Source:HGNC Symbol;Acc:HGNC:30285]	no	no	no	no
ENSG00000018236	144.129	5.38831	1.61411	3.33825	0.000843064	0.00634466	12	CNTN1	40692439	41072415	contactin 1 [Source:HGNC Symbol;Acc:HGNC:2171]	no	no	no	no
ENSG00000018408	4700.97	0.704789	0.129065	5.46073	4.74174e-08	1.0823e-06	3	WWTR1	149517235	149736714	WW domain containing transcription regulator 1 [Source:HGNC Symbol;Acc:HGNC:24042]	no	no	no	no
ENSG00000018510	2802.97	-0.193413	0.162686	-1.18887	0.234491	0.457397	2	AGPS	177392746	177567024	alkylglycerone phosphate synthase [Source:HGNC Symbol;Acc:HGNC:327]	no	no	no	no
ENSG00000018610	592.242	-0.227908	0.156415	-1.45707	0.145098	0.336483	X	STEEP1	119538149	119565409	STING1 ER exit protein 1 [Source:HGNC Symbol;Acc:HGNC:26239]	no	no	no	yes
ENSG00000018699	776.424	-0.497214	0.142955	-3.47811	0.000504967	0.00414098	2	TTC27	32628032	32821051	tetratricopeptide repeat domain 27 [Source:HGNC Symbol;Acc:HGNC:25986]	no	no	no	no
ENSG00000019144	8806.33	-0.150755	0.230593	-0.653769	0.513261	0.716545	11	PHLDB1	118606440	118658031	pleckstrin homology like domain family B member 1 [Source:HGNC Symbol;Acc:HGNC:23697]	no	no	no	no
ENSG00000019186	84.8633	5.7623	1.6267	3.54232	0.000396617	0.00339626	20	CYP24A1	54153446	54173986	cytochrome P450 family 24 subfamily A member 1 [Source:HGNC Symbol;Acc:HGNC:2602]	no	no	no	no
ENSG00000019485	284.775	0.470857	0.252292	1.86632	0.0619971	0.188787	11	PRDM11	45095806	45235110	PR/SET domain 11 [Source:HGNC Symbol;Acc:HGNC:13996]	no	no	no	no
ENSG00000019549	7905.85	-0.216225	0.124574	-1.73572	0.0826125	0.231516	8	SNAI2	48917598	48921740	snail family transcriptional repressor 2 [Source:HGNC Symbol;Acc:HGNC:11094]	no	no	no	no
ENSG00000019991	66.6367	-0.107802	0.419879	-0.256744	0.797376	0.893867	7	HGF	81699010	81770438	hepatocyte growth factor [Source:HGNC Symbol;Acc:HGNC:4893]	no	no	no	no
ENSG00000019995	955.858	0.0628101	0.189213	0.331956	0.739923	0.863746	10	ZRANB1	124942123	124988189	zinc finger RANBP2-type containing 1 [Source:HGNC Symbol;Acc:HGNC:18224]	no	no	no	no
ENSG00000020129	1901.63	-0.570995	0.184861	-3.08879	0.00200974	0.0131361	1	NCDN	35557473	35567274	neurochondrin [Source:HGNC Symbol;Acc:HGNC:17597]	no	no	no	no
ENSG00000020181	10918	0.37338	0.139482	2.6769	0.00743061	0.0378573	8	ADGRA2	37784191	37844896	adhesion G protein-coupled receptor A2 [Source:HGNC Symbol;Acc:HGNC:17849]	no	no	no	no
ENSG00000020256	887.159	0.559609	0.183426	3.05086	0.00228184	0.0145812	20	ZFP64	52051663	52204308	ZFP64 zinc finger protein [Source:HGNC Symbol;Acc:HGNC:15940]	no	no	no	no
ENSG00000020426	652.025	0.0915006	0.167826	0.54521	0.585609	0.767684	14	MNAT1	60734742	60969965	MNAT1 component of CDK activating kinase [Source:HGNC Symbol;Acc:HGNC:7181]	no	no	no	no
ENSG00000020577	4419.43	0.301543	0.129848	2.32228	0.020218	0.0815781	14	SAMD4A	54566117	54793315	sterile alpha motif domain containing 4A [Source:HGNC Symbol;Acc:HGNC:23023]	no	no	no	no
ENSG00000020633	671.515	0.898059	0.261098	3.43955	0.000582684	0.00467638	1	RUNX3	24899511	24965121	RUNX family transcription factor 3 [Source:HGNC Symbol;Acc:HGNC:10473]	no	no	no	no
ENSG00000020922	1019.37	-0.270369	0.172366	-1.56857	0.116747	0.28958	11	MRE11	94415570	94493885	MRE11 homolog, double strand break repair nuclease [Source:HGNC Symbol;Acc:HGNC:7230]	no	no	no	no
ENSG00000021355	1323.32	-0.250418	0.148117	-1.69067	0.0908997	0.245821	6	SERPINB1	2832332	2841959	serpin family B member 1 [Source:HGNC Symbol;Acc:HGNC:3311]	no	no	no	no
ENSG00000021574	878.395	-0.044198	0.121016	-0.365223	0.714945	0.848455	2	SPAST	32063556	32157637	spastin [Source:HGNC Symbol;Acc:HGNC:11233]	no	no	no	no
ENSG00000021645	61.2632	1.03541	1.11143	0.931602	0.351542	0.582835	14	NRXN3	78170373	79868291	neurexin 3 [Source:HGNC Symbol;Acc:HGNC:8010]	no	no	no	no
ENSG00000021762	2781.91	-0.209009	0.17294	-1.20856	0.226832	0.448219	11	OSBPL5	3087107	3166739	oxysterol binding protein like 5 [Source:HGNC Symbol;Acc:HGNC:16392]	no	no	no	no
ENSG00000021776	2923.43	-0.477204	0.114928	-4.15219	3.29314e-05	0.000381784	15	AQR	34851782	34969742	aquarius intron-binding spliceosomal factor [Source:HGNC Symbol;Acc:HGNC:29513]	no	no	no	no
ENSG00000021826	515.246	-0.221646	0.212486	-1.04311	0.296897	0.526475	2	CPS1	210477682	210679107	carbamoyl-phosphate synthase 1 [Source:HGNC Symbol;Acc:HGNC:2323]	no	no	no	no
ENSG00000022267	13637.7	0.115921	0.266323	0.435264	0.663371	0.817004	X	FHL1	136146702	136211359	four and a half LIM domains 1 [Source:HGNC Symbol;Acc:HGNC:3702]	no	no	no	yes
ENSG00000022277	2992.42	-0.07327	0.165091	-0.443816	0.657175	0.813003	20	RTF2	56468585	56519449	replication termination factor 2 [Source:HGNC Symbol;Acc:HGNC:15890]	no	no	no	no
ENSG00000022567	215.127	-0.45605	0.180065	-2.5327	0.0113189	0.0523054	8	SLC45A4	141207166	141308305	solute carrier family 45 member 4 [Source:HGNC Symbol;Acc:HGNC:29196]	no	no	no	no
ENSG00000022840	4781.4	-0.155833	0.167685	-0.92932	0.352723	0.583735	12	RNF10	120533480	120577588	ring finger protein 10 [Source:HGNC Symbol;Acc:HGNC:10055]	no	no	no	no
ENSG00000022976	270.573	0.0447645	0.176363	0.25382	0.799635	0.894901	14	ZNF839	102317377	102342702	zinc finger protein 839 [Source:HGNC Symbol;Acc:HGNC:20345]	no	no	no	no
ENSG00000023041	1698.62	-0.218589	0.148684	-1.47016	0.141518	0.330412	10	ZDHHC6	112424428	112447572	zinc finger DHHC-type palmitoyltransferase 6 [Source:HGNC Symbol;Acc:HGNC:19160]	no	no	no	no
ENSG00000023171	1329.82	-0.719505	0.217724	-3.30467	0.00095089	0.00700012	11	GRAMD1B	123358428	123627774	GRAM domain containing 1B [Source:HGNC Symbol;Acc:HGNC:29214]	no	no	no	no
ENSG00000023191	12517.9	-0.806984	0.206283	-3.91202	9.15263e-05	0.000952887	11	RNH1	494512	507300	ribonuclease/angiogenin inhibitor 1 [Source:HGNC Symbol;Acc:HGNC:10074]	no	no	no	no
ENSG00000023228	3836.71	-0.178639	0.163987	-1.08935	0.276001	0.505343	2	NDUFS1	206114817	206159509	NADH:ubiquinone oxidoreductase core subunit S1 [Source:HGNC Symbol;Acc:HGNC:7707]	no	no	no	no
ENSG00000023287	3006.22	0.125509	0.147058	0.85347	0.393399	0.620819	8	RB1CC1	52622458	52745843	RB1 inducible coiled-coil 1 [Source:HGNC Symbol;Acc:HGNC:15574]	no	no	no	no
ENSG00000023318	3099.83	-0.212946	0.165895	-1.28362	0.199275	0.413626	9	ERP44	99979185	100099052	endoplasmic reticulum protein 44 [Source:HGNC Symbol;Acc:HGNC:18311]	no	no	no	no
ENSG00000023330	1611.38	-0.675727	0.146344	-4.61739	3.88603e-06	5.88265e-05	3	ALAS1	52198086	52214327	5'-aminolevulinate synthase 1 [Source:HGNC Symbol;Acc:HGNC:396]	no	no	no	no
ENSG00000023445	58.4244	1.62971	0.314986	5.17391	2.2925e-07	4.62362e-06	11	BIRC3	102317450	102339403	baculoviral IAP repeat containing 3 [Source:HGNC Symbol;Acc:HGNC:591]	no	no	no	no
ENSG00000023516	3566.69	-0.339588	0.131727	-2.57796	0.0099385	0.0473553	13	AKAP11	42272152	42323261	A-kinase anchoring protein 11 [Source:HGNC Symbol;Acc:HGNC:369]	no	no	no	no
ENSG00000023572	616.989	-0.110946	0.122558	-0.905254	0.365331	0.595914	1	GLRX2	193090866	193106114	glutaredoxin 2 [Source:HGNC Symbol;Acc:HGNC:16065]	no	no	no	no
ENSG00000023608	476.978	-0.207982	0.149713	-1.38921	0.16477	0.364403	14	SNAPC1	61762420	61796428	small nuclear RNA activating complex polypeptide 1 [Source:HGNC Symbol;Acc:HGNC:11134]	no	no	no	no
ENSG00000023697	1149.6	-0.0594235	0.131829	-0.450762	0.652161	0.810586	12	DERA	15911302	16037381	deoxyribose-phosphate aldolase [Source:HGNC Symbol;Acc:HGNC:24269]	no	no	no	no
ENSG00000023734	6501.68	-0.11632	0.152788	-0.761319	0.446467	0.666218	12	STRAP	15882387	15903478	serine/threonine kinase receptor associated protein [Source:HGNC Symbol;Acc:HGNC:30796]	no	no	no	no
ENSG00000023902	3691.74	0.371232	0.118327	3.13733	0.00170492	0.0114501	1	PLEKHO1	150149183	150164720	pleckstrin homology domain containing O1 [Source:HGNC Symbol;Acc:HGNC:24310]	no	no	no	no
ENSG00000023909	2245.37	-0.818199	0.212628	-3.84802	0.000119075	0.0011969	1	GCLM	93885199	93909456	glutamate-cysteine ligase modifier subunit [Source:HGNC Symbol;Acc:HGNC:4312]	no	no	no	no
ENSG00000024048	2143.98	-0.192273	0.161385	-1.1914	0.233498	0.456392	6	UBR2	42564029	42693505	ubiquitin protein ligase E3 component n-recognin 2 [Source:HGNC Symbol;Acc:HGNC:21289]	no	no	no	no
ENSG00000024422	26117.7	-0.186583	0.126123	-1.47938	0.139039	0.326523	19	EHD2	47713422	47743134	EH domain containing 2 [Source:HGNC Symbol;Acc:HGNC:3243]	no	no	no	no
ENSG00000024526	979.402	-0.147641	0.277048	-0.532908	0.594097	0.772799	1	DEPDC1	68474152	68497221	DEP domain containing 1 [Source:HGNC Symbol;Acc:HGNC:22949]	no	no	no	no
ENSG00000024862	316.664	-0.125347	0.192066	-0.652623	0.513999	0.717323	6	CCDC28A	138773769	138793319	coiled-coil domain containing 28A [Source:HGNC Symbol;Acc:HGNC:21098]	no	no	no	no
ENSG00000025156	648.248	0.106779	0.102164	1.04517	0.295944	0.525847	6	HSF2	122399551	122433119	heat shock transcription factor 2 [Source:HGNC Symbol;Acc:HGNC:5225]	no	no	no	no
ENSG00000025293	2382.19	-0.200711	0.12824	-1.56512	0.117555	0.290906	20	PHF20	35771974	35950370	PHD finger protein 20 [Source:HGNC Symbol;Acc:HGNC:16098]	no	no	no	no
ENSG00000025423	72.9241	0.664947	0.416364	1.59703	0.110258	0.279722	12	HSD17B6	56752161	56787790	hydroxysteroid 17-beta dehydrogenase 6 [Source:HGNC Symbol;Acc:HGNC:23316]	no	no	no	no
ENSG00000025434	168.833	0.0911131	0.278565	0.32708	0.743607	0.865668	11	NR1H3	47248300	47269033	nuclear receptor subfamily 1 group H member 3 [Source:HGNC Symbol;Acc:HGNC:7966]	no	no	no	no
ENSG00000025708	280.784	0.189626	0.279519	0.678403	0.497516	0.705381	22	TYMP	50525752	50530032	thymidine phosphorylase [Source:HGNC Symbol;Acc:HGNC:3148]	no	no	no	no
ENSG00000025770	1338.19	-0.114779	0.171465	-0.669402	0.503239	0.708689	22	NCAPH2	50508224	50524780	non-SMC condensin II complex subunit H2 [Source:HGNC Symbol;Acc:HGNC:25071]	no	no	no	no
ENSG00000025772	2111.01	-0.440103	0.211321	-2.08262	0.0372854	0.130772	20	TOMM34	44942130	44960397	translocase of outer mitochondrial membrane 34 [Source:HGNC Symbol;Acc:HGNC:15746]	no	no	no	no
ENSG00000025796	6785.02	-0.268812	0.179611	-1.49663	0.134489	0.319064	6	SEC63	107867756	107958208	SEC63 homolog, protein translocation regulator [Source:HGNC Symbol;Acc:HGNC:21082]	no	no	no	no
ENSG00000025800	3857.66	-0.0536133	0.123083	-0.435585	0.663138	0.817004	1	KPNA6	32108056	32176563	karyopherin subunit alpha 6 [Source:HGNC Symbol;Acc:HGNC:6399]	no	no	no	no
ENSG00000026025	207523	0.00958351	0.127034	0.0754403	0.939864	0.972864	10	VIM	17228241	17237593	vimentin [Source:HGNC Symbol;Acc:HGNC:12692]	no	no	no	no
ENSG00000026036	190.5	0.213535	0.19107	1.11758	0.263748	0.49112	20	RTEL1-TNFRSF6B	63659300	63698684	RTEL1-TNFRSF6B readthrough (NMD candidate) [Source:HGNC Symbol;Acc:HGNC:44095]	no	no	no	no
ENSG00000026103	2023.15	-0.878557	0.155238	-5.65943	1.51873e-08	3.87565e-07	10	FAS	88953813	89029605	Fas cell surface death receptor [Source:HGNC Symbol;Acc:HGNC:11920]	no	no	no	no
ENSG00000026297	232.324	-0.63555	0.226707	-2.8034	0.00505669	0.0277024	6	RNASET2	166922113	166957191	ribonuclease T2 [Source:HGNC Symbol;Acc:HGNC:21686]	no	no	no	no
ENSG00000026508	35637.5	0.0381929	0.137036	0.278706	0.78047	0.884724	11	CD44	35138882	35232402	CD44 molecule (Indian blood group) [Source:HGNC Symbol;Acc:HGNC:1681]	no	no	no	no
ENSG00000026559	530.388	1.40661	0.222794	6.31348	2.72827e-10	9.92577e-09	20	KCNG1	51003656	51023107	potassium voltage-gated channel modifier subfamily G member 1 [Source:HGNC Symbol;Acc:HGNC:6248]	no	no	no	no
ENSG00000026652	1299.24	-0.185908	0.19357	-0.960416	0.336846	0.568262	6	AGPAT4	161129967	161274061	1-acylglycerol-3-phosphate O-acyltransferase 4 [Source:HGNC Symbol;Acc:HGNC:20885]	no	no	no	no
ENSG00000026950	986.034	-0.0547485	0.145467	-0.376364	0.706646	0.84337	6	BTN3A1	26402237	26415208	butyrophilin subfamily 3 member A1 [Source:HGNC Symbol;Acc:HGNC:1138]	no	no	no	no
ENSG00000027001	622.167	-0.1284	0.172463	-0.744508	0.456569	0.673878	13	MIPEP	23730189	23889400	mitochondrial intermediate peptidase [Source:HGNC Symbol;Acc:HGNC:7104]	no	no	no	no
ENSG00000027697	1636.6	-0.24249	0.195641	-1.23947	0.215173	0.434036	6	IFNGR1	137197483	137219449	interferon gamma receptor 1 [Source:HGNC Symbol;Acc:HGNC:5439]	no	no	no	no
ENSG00000027847	1243.57	-0.0445701	0.194909	-0.228671	0.819125	0.905986	5	B4GALT7	177600132	177610330	beta-1,4-galactosyltransferase 7 [Source:HGNC Symbol;Acc:HGNC:930]	no	no	no	no
ENSG00000028116	678.802	-0.306168	0.180873	-1.69272	0.0905085	0.245166	2	VRK2	57907629	58159920	VRK serine/threonine kinase 2 [Source:HGNC Symbol;Acc:HGNC:12719]	no	no	no	no
ENSG00000028137	317.554	-1.00718	0.292297	-3.44575	0.000569483	0.00457881	1	TNFRSF1B	12166991	12209228	TNF receptor superfamily member 1B [Source:HGNC Symbol;Acc:HGNC:11917]	no	no	no	no
ENSG00000028203	2396.62	-0.0233856	0.138453	-0.168906	0.865871	0.93265	12	VEZT	95217746	95302799	vezatin, adherens junctions transmembrane protein [Source:HGNC Symbol;Acc:HGNC:18258]	no	no	no	no
ENSG00000028277	589.16	1.53943	0.135697	11.3447	7.88407e-30	2.73245e-27	19	POU2F2	42086110	42196585	POU class 2 homeobox 2 [Source:HGNC Symbol;Acc:HGNC:9213]	no	no	no	no
ENSG00000028310	2117.22	0.047444	0.107171	0.442695	0.657986	0.813526	5	BRD9	850291	892801	bromodomain containing 9 [Source:HGNC Symbol;Acc:HGNC:25818]	no	no	no	no
ENSG00000028528	4721.04	-0.141393	0.109698	-1.28893	0.197423	0.410882	15	SNX1	64094123	64146090	sorting nexin 1 [Source:HGNC Symbol;Acc:HGNC:11172]	no	no	no	no
ENSG00000028839	512.28	0.20418	0.162142	1.25927	0.207934	0.425446	6	TBPL1	133952170	133990432	TATA-box binding protein like 1 [Source:HGNC Symbol;Acc:HGNC:11589]	no	no	no	no
ENSG00000029153	1496.67	-0.129165	0.202086	-0.63916	0.522719	0.723283	12	BMAL2	27332836	27425289	basic helix-loop-helix ARNT like 2 [Source:HGNC Symbol;Acc:HGNC:18984]	no	no	no	no
ENSG00000029363	6809.45	-0.0923439	0.153013	-0.603502	0.546175	0.740625	6	BCLAF1	136256627	136289851	BCL2 associated transcription factor 1 [Source:HGNC Symbol;Acc:HGNC:16863]	no	no	no	no
ENSG00000029364	2688.14	0.12125	0.100272	1.20921	0.226581	0.448078	14	SLC39A9	69398015	69462390	solute carrier family 39 member 9 [Source:HGNC Symbol;Acc:HGNC:20182]	no	no	no	no
ENSG00000029534	304.893	0.406485	0.301667	1.34746	0.177831	0.383726	8	ANK1	41653220	41896741	ankyrin 1 [Source:HGNC Symbol;Acc:HGNC:492]	no	no	no	no
ENSG00000029639	299.798	-0.0220471	0.20263	-0.108805	0.913357	0.959292	6	TFB1M	155256134	155314493	transcription factor B1, mitochondrial [Source:HGNC Symbol;Acc:HGNC:17037]	no	no	no	no
ENSG00000029725	2804.89	-0.308894	0.138047	-2.2376	0.025247	0.096294	17	RABEP1	5282265	5386340	rabaptin, RAB GTPase binding effector protein 1 [Source:HGNC Symbol;Acc:HGNC:17677]	no	no	no	no
ENSG00000029993	1455.79	0.0131725	0.224051	0.0587923	0.953118	0.978452	X	HMGB3	150980509	150990771	high mobility group box 3 [Source:HGNC Symbol;Acc:HGNC:5004]	no	no	no	yes
ENSG00000030066	1955.94	-0.0657715	0.145842	-0.450976	0.652007	0.810482	11	NUP160	47778087	47848555	nucleoporin 160 [Source:HGNC Symbol;Acc:HGNC:18017]	no	no	no	no
ENSG00000030110	937.648	-0.0147022	0.210831	-0.0697346	0.944405	0.975132	6	BAK1	33572547	33580293	BCL2 antagonist/killer 1 [Source:HGNC Symbol;Acc:HGNC:949]	no	no	no	no
ENSG00000030419	259.834	1.09028	0.295661	3.68761	0.000226369	0.00210245	2	IKZF2	212999691	213152427	IKAROS family zinc finger 2 [Source:HGNC Symbol;Acc:HGNC:13177]	no	no	no	no
ENSG00000030582	15413.9	-0.651571	0.220645	-2.95303	0.00314674	0.0189342	17	GRN	44345246	44353106	granulin precursor [Source:HGNC Symbol;Acc:HGNC:4601]	no	no	no	no
ENSG00000031003	2475.05	-0.407437	0.0822676	-4.95258	7.32356e-07	1.32853e-05	5	FAM13B	137937960	138051961	family with sequence similarity 13 member B [Source:HGNC Symbol;Acc:HGNC:1335]	no	no	no	no
ENSG00000031081	4358.48	-0.349441	0.185805	-1.88069	0.0600141	0.184497	3	ARHGAP31	119294383	119420714	Rho GTPase activating protein 31 [Source:HGNC Symbol;Acc:HGNC:29216]	no	no	no	no
ENSG00000031691	265.577	-1.3904	0.223391	-6.2241	4.84332e-10	1.67662e-08	6	CENPQ	49463370	49493107	centromere protein Q [Source:HGNC Symbol;Acc:HGNC:21347]	no	no	no	no
ENSG00000031698	10616.8	0.0356904	0.213283	0.167338	0.867104	0.93319	1	SARS1	109213918	109238182	seryl-tRNA synthetase 1 [Source:HGNC Symbol;Acc:HGNC:10537]	no	no	no	no
ENSG00000031823	2372.88	-0.025994	0.101905	-0.25508	0.798661	0.894647	19	RANBP3	5916139	5978142	RAN binding protein 3 [Source:HGNC Symbol;Acc:HGNC:9850]	no	no	no	no
ENSG00000032219	940.243	-0.198231	0.116842	-1.69657	0.0897775	0.243788	14	ARID4A	58298504	58373887	AT-rich interaction domain 4A [Source:HGNC Symbol;Acc:HGNC:9885]	no	no	no	no
ENSG00000032389	737.39	-0.0344522	0.137039	-0.251405	0.801501	0.895948	2	EIPR1	3188925	3377830	EARP complex and GARP complex interacting protein 1 [Source:HGNC Symbol;Acc:HGNC:12383]	no	no	no	no
ENSG00000032444	3180.6	-0.159051	0.192821	-0.824866	0.409448	0.635478	19	PNPLA6	7534004	7561764	patatin like phospholipase domain containing 6 [Source:HGNC Symbol;Acc:HGNC:16268]	no	no	no	no
ENSG00000032742	565.902	0.0406753	0.147823	0.275162	0.783192	0.886304	13	IFT88	20567138	20691444	intraflagellar transport 88 [Source:HGNC Symbol;Acc:HGNC:20606]	no	no	no	no
ENSG00000033011	997.915	-0.144772	0.062742	-2.30742	0.0210316	0.0839813	16	ALG1	5033702	5087379	ALG1 chitobiosyldiphosphodolichol beta-mannosyltransferase [Source:HGNC Symbol;Acc:HGNC:18294]	no	no	no	no
ENSG00000033030	1085.6	0.101323	0.129281	0.783742	0.433192	0.655512	12	ZCCHC8	122471599	122501073	zinc finger CCHC-type containing 8 [Source:HGNC Symbol;Acc:HGNC:25265]	no	no	no	no
ENSG00000033050	714.801	-0.299692	0.145191	-2.06411	0.0390069	0.134482	7	ABCF2	151211484	151227205	ATP binding cassette subfamily F member 2 [Source:HGNC Symbol;Acc:HGNC:71]	no	no	no	no
ENSG00000033100	6925.39	-0.318073	0.170301	-1.86771	0.0618027	0.188325	7	CHPF2	151232483	151240979	chondroitin polymerizing factor 2 [Source:HGNC Symbol;Acc:HGNC:29270]	no	no	no	no
ENSG00000033170	3197.64	0.441767	0.211185	2.09185	0.0364522	0.128569	14	FUT8	65410592	65744121	fucosyltransferase 8 [Source:HGNC Symbol;Acc:HGNC:4019]	no	no	no	no
ENSG00000033178	3051.34	-0.121442	0.177063	-0.685871	0.492794	0.701632	4	UBA6	67612652	67701155	ubiquitin like modifier activating enzyme 6 [Source:HGNC Symbol;Acc:HGNC:25581]	no	no	no	no
ENSG00000033327	735.038	-0.738664	0.158	-4.6751	2.93807e-06	4.57922e-05	11	GAB2	78215293	78418348	GRB2 associated binding protein 2 [Source:HGNC Symbol;Acc:HGNC:14458]	no	no	no	no
ENSG00000033627	1661.57	-0.397603	0.237292	-1.67559	0.0938189	0.251086	17	ATP6V0A1	42458844	42522582	ATPase H+ transporting V0 subunit a1 [Source:HGNC Symbol;Acc:HGNC:865]	no	no	no	no
ENSG00000033800	1279.47	-0.110475	0.105733	-1.04484	0.296095	0.525903	15	PIAS1	68054309	68198603	protein inhibitor of activated STAT 1 [Source:HGNC Symbol;Acc:HGNC:2752]	no	no	no	no
ENSG00000033867	3141.88	0.299312	0.175122	1.70916	0.0874209	0.240211	3	SLC4A7	27372721	27484420	solute carrier family 4 member 7 [Source:HGNC Symbol;Acc:HGNC:11033]	no	no	no	no
ENSG00000034053	169.592	6.28719	0.48494	12.9649	1.93562e-38	1.15873e-35	15	APBA2	28884483	29118315	amyloid beta precursor protein binding family A member 2 [Source:HGNC Symbol;Acc:HGNC:579]	no	no	no	no
ENSG00000034152	6747.42	-0.840331	0.203976	-4.11975	3.79285e-05	0.00043588	17	MAP2K3	21284672	21315232	mitogen-activated protein kinase kinase 3 [Source:HGNC Symbol;Acc:HGNC:6843]	no	no	no	no
ENSG00000034510	64009.8	0.205728	0.1066	1.9299	0.0536191	0.169629	2	TMSB10	84905656	84906671	thymosin beta 10 [Source:HGNC Symbol;Acc:HGNC:11879]	no	no	no	no
ENSG00000034533	241.105	-0.168413	0.124038	-1.35775	0.174543	0.378703	3	ASTE1	131013875	131027649	asteroid homolog 1 [Source:HGNC Symbol;Acc:HGNC:25021]	no	no	no	no
ENSG00000034677	2147.32	-0.0713457	0.106765	-0.668251	0.503974	0.709223	8	RNF19A	100257060	100336218	ring finger protein 19A, RBR E3 ubiquitin protein ligase [Source:HGNC Symbol;Acc:HGNC:13432]	no	no	no	no
ENSG00000034693	606.091	-0.352467	0.133518	-2.63984	0.0082945	0.0412221	6	PEX3	143450805	143490616	peroxisomal biogenesis factor 3 [Source:HGNC Symbol;Acc:HGNC:8858]	no	no	no	no
ENSG00000034713	1806.52	0.038608	0.157389	0.245304	0.806221	0.898835	16	GABARAPL2	75566375	75577881	GABA type A receptor associated protein like 2 [Source:HGNC Symbol;Acc:HGNC:13291]	no	no	no	no
ENSG00000035115	1134.57	-0.0103613	0.190788	-0.0543077	0.95669	0.980144	2	SH3YL1	217730	266398	SH3 and SYLF domain containing 1 [Source:HGNC Symbol;Acc:HGNC:29546]	no	no	no	no
ENSG00000035141	1190.63	-0.17051	0.11929	-1.42937	0.152898	0.347789	2	FAM136A	70295976	70302067	family with sequence similarity 136 member A [Source:HGNC Symbol;Acc:HGNC:25911]	no	no	no	no
ENSG00000035403	44004.2	-0.213552	0.159616	-1.3379	0.180927	0.388714	10	VCL	73995193	74121363	vinculin [Source:HGNC Symbol;Acc:HGNC:12665]	no	no	no	no
ENSG00000035499	173.66	-0.109792	0.291789	-0.376272	0.706715	0.84337	5	DEPDC1B	60596912	60700190	DEP domain containing 1B [Source:HGNC Symbol;Acc:HGNC:24902]	no	no	no	no
ENSG00000035664	527.778	-0.424363	0.288157	-1.47268	0.140838	0.329514	15	DAPK2	63907036	64072033	death associated protein kinase 2 [Source:HGNC Symbol;Acc:HGNC:2675]	no	no	no	no
ENSG00000035681	2388.57	-0.135124	0.123987	-1.08983	0.275788	0.505164	8	NSMAF	58583508	58659853	neutral sphingomyelinase activation associated factor [Source:HGNC Symbol;Acc:HGNC:8017]	no	no	no	no
ENSG00000035687	2317.62	-0.113324	0.180944	-0.626294	0.531122	0.729697	1	ADSS2	244408494	244451909	adenylosuccinate synthase 2 [Source:HGNC Symbol;Acc:HGNC:292]	no	no	no	no
ENSG00000035862	70504.8	-0.439642	0.131278	-3.34893	0.000811253	0.00615784	17	TIMP2	78852977	78925387	TIMP metallopeptidase inhibitor 2 [Source:HGNC Symbol;Acc:HGNC:11821]	no	no	no	no
ENSG00000035928	2756.97	-0.216032	0.177085	-1.21994	0.222489	0.443027	4	RFC1	39287456	39366375	replication factor C subunit 1 [Source:HGNC Symbol;Acc:HGNC:9969]	no	no	no	no
ENSG00000036054	2452.47	0.177797	0.0959279	1.85344	0.0638194	0.19235	3	TBC1D23	100260992	100325251	TBC1 domain family member 23 [Source:HGNC Symbol;Acc:HGNC:25622]	no	no	no	no
ENSG00000036257	2927.01	-0.0950572	0.189089	-0.50271	0.615168	0.785871	2	CUL3	224470150	224585397	cullin 3 [Source:HGNC Symbol;Acc:HGNC:2553]	no	no	no	no
ENSG00000036448	56.0784	1.51119	0.217935	6.93412	4.08764e-12	2.00127e-10	8	MYOM2	2045046	2165552	myomesin 2 [Source:HGNC Symbol;Acc:HGNC:7614]	no	no	no	no
ENSG00000036549	2483.32	0.00202156	0.1454	0.0139034	0.988907	0.993585	1	ZZZ3	77562416	77683419	zinc finger ZZ-type containing 3 [Source:HGNC Symbol;Acc:HGNC:24523]	no	no	no	no
ENSG00000036672	35.3554	-0.111761	0.345614	-0.32337	0.746415	0.867556	11	USP2	119355215	119381711	ubiquitin specific peptidase 2 [Source:HGNC Symbol;Acc:HGNC:12618]	no	no	no	no
ENSG00000037042	1435.61	-0.0610937	0.129943	-0.470159	0.638241	0.80159	17	TUBG2	42659284	42667006	tubulin gamma 2 [Source:HGNC Symbol;Acc:HGNC:12419]	no	no	no	no
ENSG00000037241	1250.74	-0.0247276	0.166035	-0.14893	0.881609	0.941823	5	RPL26L1	172958729	172969771	ribosomal protein L26 like 1 [Source:HGNC Symbol;Acc:HGNC:17050]	no	no	no	no
ENSG00000037474	3276.99	-0.11535	0.14407	-0.80065	0.423334	0.647539	5	NSUN2	6599239	6633291	NOP2/Sun RNA methyltransferase 2 [Source:HGNC Symbol;Acc:HGNC:25994]	no	no	no	no
ENSG00000037637	1130.64	0.0976688	0.192546	0.507249	0.61198	0.784295	1	FBXO42	16246840	16352480	F-box protein 42 [Source:HGNC Symbol;Acc:HGNC:29249]	no	no	no	no
ENSG00000037749	1300.39	-0.135986	0.148053	-0.918493	0.358361	0.589477	5	MFAP3	154038959	154220478	microfibril associated protein 3 [Source:HGNC Symbol;Acc:HGNC:7034]	no	no	no	no
ENSG00000037757	932.548	0.0581909	0.174473	0.333524	0.738739	0.863205	19	MRI1	13764522	13774282	methylthioribose-1-phosphate isomerase 1 [Source:HGNC Symbol;Acc:HGNC:28469]	no	no	no	no
ENSG00000037897	426.208	-0.107918	0.132074	-0.817098	0.413872	0.639078	12	METTL1	57768471	57772119	methyltransferase 1, tRNA methylguanosine [Source:HGNC Symbol;Acc:HGNC:7030]	no	no	no	no
ENSG00000037965	3815.43	-0.314116	0.279299	-1.12466	0.260733	0.487694	12	HOXC8	54008985	54012769	homeobox C8 [Source:HGNC Symbol;Acc:HGNC:5129]	no	no	no	no
ENSG00000038002	914.344	-0.359842	0.21769	-1.653	0.0983312	0.259368	4	AGA	177430774	177442437	aspartylglucosaminidase [Source:HGNC Symbol;Acc:HGNC:318]	no	no	no	no
ENSG00000038210	1771.99	-0.390805	0.167312	-2.33579	0.0195023	0.0794941	4	PI4K2B	25160663	25279204	phosphatidylinositol 4-kinase type 2 beta [Source:HGNC Symbol;Acc:HGNC:18215]	no	no	no	no
ENSG00000038219	3414.34	0.188641	0.105532	1.78752	0.0738532	0.213581	4	BOD1L1	13568738	13627725	biorientation of chromosomes in cell division 1 like 1 [Source:HGNC Symbol;Acc:HGNC:31792]	no	no	no	no
ENSG00000038274	2226.39	-0.159951	0.11431	-1.39927	0.161731	0.359615	5	MAT2B	163503114	163519558	methionine adenosyltransferase 2B [Source:HGNC Symbol;Acc:HGNC:6905]	no	no	no	no
ENSG00000038358	2169.84	-0.0496545	0.182828	-0.271592	0.785936	0.887896	16	EDC4	67873052	67884499	enhancer of mRNA decapping 4 [Source:HGNC Symbol;Acc:HGNC:17157]	no	no	no	no
ENSG00000038382	18294.8	0.0851802	0.145753	0.584415	0.558941	0.749085	5	TRIO	14143342	14532128	trio Rho guanine nucleotide exchange factor [Source:HGNC Symbol;Acc:HGNC:12303]	no	no	no	no
ENSG00000038427	39540.4	-0.376235	0.20931	-1.7975	0.0722557	0.210114	5	VCAN	83471618	83582303	versican [Source:HGNC Symbol;Acc:HGNC:2464]	no	no	no	no
ENSG00000038532	1222.61	-0.195108	0.0850395	-2.29433	0.0217718	0.0861322	16	CLEC16A	10944539	11182186	C-type lectin domain containing 16A [Source:HGNC Symbol;Acc:HGNC:29013]	no	no	no	no
ENSG00000039068	33.7203	-1.91015	0.43651	-4.37597	1.20894e-05	0.000160178	16	CDH1	68737292	68835537	cadherin 1 [Source:HGNC Symbol;Acc:HGNC:1748]	no	no	no	no
ENSG00000039123	2508.02	-0.239715	0.179356	-1.33653	0.181376	0.389206	5	MTREX	55307989	55425579	Mtr4 exosome RNA helicase [Source:HGNC Symbol;Acc:HGNC:18734]	no	no	no	no
ENSG00000039139	71.1015	-0.702433	0.152655	-4.60145	4.19557e-06	6.2862e-05	5	DNAH5	13690328	14011818	dynein axonemal heavy chain 5 [Source:HGNC Symbol;Acc:HGNC:2950]	no	no	no	no
ENSG00000039319	2217.51	-0.127759	0.0936467	-1.36426	0.172485	0.375787	5	ZFYVE16	80408013	80483379	zinc finger FYVE-type containing 16 [Source:HGNC Symbol;Acc:HGNC:20756]	no	no	no	no
ENSG00000039523	4276.95	-0.566187	0.139539	-4.05754	4.95923e-05	0.00055444	16	RIPOR1	67518418	67546788	RHO family interacting cell polarization regulator 1 [Source:HGNC Symbol;Acc:HGNC:25836]	no	no	no	no
ENSG00000039560	7854.45	0.452138	0.140645	3.21475	0.00130558	0.0091802	5	RAI14	34656328	34832612	retinoic acid induced 14 [Source:HGNC Symbol;Acc:HGNC:14873]	no	no	no	no
ENSG00000039650	1247.83	-0.172165	0.184382	-0.933742	0.350437	0.581852	19	PNKP	49859882	49878351	polynucleotide kinase 3'-phosphatase [Source:HGNC Symbol;Acc:HGNC:9154]	no	no	no	no
ENSG00000040199	1409.02	-0.44125	0.0721056	-6.1195	9.3872e-10	3.08303e-08	16	PHLPP2	71637835	71724701	PH domain and leucine rich repeat protein phosphatase 2 [Source:HGNC Symbol;Acc:HGNC:29149]	no	no	no	no
ENSG00000040275	3960.72	0.135683	0.198255	0.684387	0.493731	0.702591	5	SPDL1	169583636	169604778	spindle apparatus coiled-coil protein 1 [Source:HGNC Symbol;Acc:HGNC:26010]	no	no	no	no
ENSG00000040341	776.236	-0.277244	0.147983	-1.87348	0.0610016	0.186431	8	STAU2	73420369	73747708	staufen double-stranded RNA binding protein 2 [Source:HGNC Symbol;Acc:HGNC:11371]	no	no	no	no
ENSG00000040487	646.097	-0.300391	0.209833	-1.43157	0.152266	0.347305	1	SLC66A1	19312326	19329300	solute carrier family 66 member 1 [Source:HGNC Symbol;Acc:HGNC:26001]	no	no	no	no
ENSG00000040531	899.407	-0.424506	0.209035	-2.0308	0.0422758	0.142642	17	CTNS	3636459	3663103	cystinosin, lysosomal cystine transporter [Source:HGNC Symbol;Acc:HGNC:2518]	no	no	no	no
ENSG00000040633	2083.28	-0.0232624	0.149291	-0.155819	0.876176	0.938378	17	PHF23	7235029	7239722	PHD finger protein 23 [Source:HGNC Symbol;Acc:HGNC:28428]	no	no	no	no
ENSG00000040731	73.8893	0.197718	0.592998	0.333421	0.738816	0.86322	5	CDH10	24487100	24644978	cadherin 10 [Source:HGNC Symbol;Acc:HGNC:1749]	no	no	no	no
ENSG00000040933	1426.83	-0.14567	0.119199	-1.22208	0.221678	0.441993	2	INPP4A	98444854	98594392	inositol polyphosphate-4-phosphatase type I A [Source:HGNC Symbol;Acc:HGNC:6074]	no	no	no	no
ENSG00000041353	40.9092	-0.113908	0.460798	-0.247198	0.804755	0.897978	18	RAB27B	54717860	54895516	RAB27B, member RAS oncogene family [Source:HGNC Symbol;Acc:HGNC:9767]	no	no	no	no
ENSG00000041357	3839.91	0.0576666	0.143378	0.4022	0.687537	0.831713	15	PSMA4	78540405	78552417	proteasome 20S subunit alpha 4 [Source:HGNC Symbol;Acc:HGNC:9533]	no	no	no	no
ENSG00000041802	1651.51	-0.275683	0.106866	-2.57971	0.00988839	0.0471604	3	LSG1	194640791	194672463	large 60S subunit nuclear export GTPase 1 [Source:HGNC Symbol;Acc:HGNC:25652]	no	no	no	no
ENSG00000041880	1691.31	-0.613849	0.144049	-4.26139	2.03162e-05	0.000248204	3	PARP3	51942345	51948867	poly(ADP-ribose) polymerase family member 3 [Source:HGNC Symbol;Acc:HGNC:273]	no	no	no	no
ENSG00000041982	118461	2.10696	0.178965	11.773	5.37658e-32	2.36032e-29	9	TNC	115019575	115118207	tenascin C [Source:HGNC Symbol;Acc:HGNC:5318]	no	no	no	no
ENSG00000041988	476.578	0.0308104	0.140071	0.219962	0.825901	0.909838	1	THAP3	6624868	6635586	THAP domain containing 3 [Source:HGNC Symbol;Acc:HGNC:20855]	no	no	no	no
ENSG00000042062	129.771	3.87212	0.560033	6.91408	4.70901e-12	2.28006e-10	20	RIPOR3	50586108	50691542	RIPOR family member 3 [Source:HGNC Symbol;Acc:HGNC:16168]	no	no	no	no
ENSG00000042088	778.252	-0.0898087	0.239215	-0.375431	0.70734	0.843643	14	TDP1	89954939	90044764	tyrosyl-DNA phosphodiesterase 1 [Source:HGNC Symbol;Acc:HGNC:18884]	no	no	no	no
ENSG00000042286	751.313	-0.329333	0.206543	-1.59451	0.110823	0.280572	10	AIFM2	70098223	70132934	apoptosis inducing factor mitochondria associated 2 [Source:HGNC Symbol;Acc:HGNC:21411]	no	no	no	no
ENSG00000042317	305.952	-0.164573	0.169155	-0.972914	0.330596	0.561963	14	SPATA7	88384924	88470350	spermatogenesis associated 7 [Source:HGNC Symbol;Acc:HGNC:20423]	no	no	no	no
ENSG00000042429	182.474	0.000747268	0.143131	0.00522086	0.995834	0.997328	11	MED17	93784227	93814963	mediator complex subunit 17 [Source:HGNC Symbol;Acc:HGNC:2375]	no	no	no	no
ENSG00000042445	2139.9	-0.313359	0.171561	-1.82652	0.0677727	0.200929	2	RETSAT	85341955	85354531	retinol saturase [Source:HGNC Symbol;Acc:HGNC:25991]	no	no	no	no
ENSG00000042493	4017.7	-0.299471	0.1856	-1.61353	0.106629	0.273965	2	CAPG	85394753	85418432	capping actin protein, gelsolin like [Source:HGNC Symbol;Acc:HGNC:1474]	no	no	no	no
ENSG00000042753	5722.9	-0.074087	0.139383	-0.531537	0.595047	0.773341	19	AP2S1	46838136	46850846	adaptor related protein complex 2 subunit sigma 1 [Source:HGNC Symbol;Acc:HGNC:565]	no	no	no	no
ENSG00000043093	1531.3	-0.19725	0.19246	-1.02489	0.305416	0.535811	3	DCUN1D1	182938074	182985953	defective in cullin neddylation 1 domain containing 1 [Source:HGNC Symbol;Acc:HGNC:18184]	no	no	no	no
ENSG00000043143	857.256	-0.797926	0.1622	-4.91939	8.68152e-07	1.55137e-05	5	JADE2	134524312	134583230	jade family PHD finger 2 [Source:HGNC Symbol;Acc:HGNC:22984]	no	no	no	no
ENSG00000043514	770.73	0.108273	0.169293	0.639563	0.522457	0.723236	1	TRIT1	39838110	39883511	tRNA isopentenyltransferase 1 [Source:HGNC Symbol;Acc:HGNC:20286]	no	no	no	no
ENSG00000044090	2823.12	0.383402	0.137789	2.78252	0.00539381	0.0291731	6	CUL7	43037617	43053943	cullin 7 [Source:HGNC Symbol;Acc:HGNC:21024]	no	no	no	no
ENSG00000044115	19960.6	-0.085124	0.127883	-0.665642	0.50564	0.710481	5	CTNNA1	138610967	138935034	catenin alpha 1 [Source:HGNC Symbol;Acc:HGNC:2509]	no	no	no	no
ENSG00000044446	940.4	0.329887	0.153691	2.14643	0.0318384	0.11571	X	PHKA2	18892298	18984114	phosphorylase kinase regulatory subunit alpha 2 [Source:HGNC Symbol;Acc:HGNC:8926]	no	no	no	yes
ENSG00000044459	783.829	-0.101275	0.150959	-0.670878	0.502298	0.708154	9	CNTLN	17134982	17503923	centlein [Source:HGNC Symbol;Acc:HGNC:23432]	no	no	no	no
ENSG00000044524	404.503	-2.12871	0.597239	-3.56426	0.000364891	0.00315951	3	EPHA3	89107621	89482134	EPH receptor A3 [Source:HGNC Symbol;Acc:HGNC:3387]	no	no	no	no
ENSG00000044574	43115.4	0.180051	0.104539	1.72234	0.0850077	0.235794	9	HSPA5	125234853	125241382	heat shock protein family A (Hsp70) member 5 [Source:HGNC Symbol;Acc:HGNC:5238]	no	no	no	no
ENSG00000046647	422.838	0.0473424	0.176031	0.268943	0.787973	0.888783	X	GEMIN8	14006726	14029893	gem nuclear organelle associated protein 8 [Source:HGNC Symbol;Acc:HGNC:26044]	no	yes	no	no
ENSG00000046651	728.715	-0.0168704	0.177574	-0.0950046	0.924311	0.964365	X	OFD1	13734743	13777955	OFD1 centriole and centriolar satellite protein [Source:HGNC Symbol;Acc:HGNC:2567]	no	yes	no	no
ENSG00000046653	77.9053	0.419319	0.295872	1.41723	0.156415	0.352904	X	GPM6B	13770939	13938638	glycoprotein M6B [Source:HGNC Symbol;Acc:HGNC:4461]	no	yes	no	no
ENSG00000047056	1204.51	-0.0160129	0.190299	-0.0841461	0.93294	0.968458	10	WDR37	1049538	1160991	WD repeat domain 37 [Source:HGNC Symbol;Acc:HGNC:31406]	no	no	no	no
ENSG00000047188	1844.85	-0.0755274	0.0812186	-0.929928	0.352408	0.583508	5	YTHDC2	113513694	113595285	YTH domain containing 2 [Source:HGNC Symbol;Acc:HGNC:24721]	no	no	no	no
ENSG00000047230	566.032	-0.0670677	0.19513	-0.343708	0.731066	0.858658	X	CTPS2	16587999	16712936	CTP synthase 2 [Source:HGNC Symbol;Acc:HGNC:2520]	no	no	yes	no
ENSG00000047249	1751.93	-0.319267	0.150419	-2.12253	0.0337935	0.121072	8	ATP6V1H	53715543	53843558	ATPase H+ transporting V1 subunit H [Source:HGNC Symbol;Acc:HGNC:18303]	no	no	no	no
ENSG00000047315	4612.71	-0.106568	0.172413	-0.618096	0.536512	0.733331	4	POLR2B	56977722	57031158	RNA polymerase II subunit B [Source:HGNC Symbol;Acc:HGNC:9188]	no	no	no	no
ENSG00000047346	1139.66	-0.113349	0.176095	-0.643683	0.519781	0.721644	15	ATOSA	52581317	52709817	atos homolog A [Source:HGNC Symbol;Acc:HGNC:25609]	no	no	no	no
ENSG00000047410	7193.12	-0.0638644	0.156725	-0.407492	0.683647	0.830235	1	TPR	186311652	186375693	translocated promoter region, nuclear basket protein [Source:HGNC Symbol;Acc:HGNC:12017]	no	no	no	no
ENSG00000047578	1233.16	-0.193926	0.203347	-0.95367	0.340251	0.572081	16	KATNIP	27550133	27780344	katanin interacting protein [Source:HGNC Symbol;Acc:HGNC:29068]	no	no	no	no
ENSG00000047579	457.704	-0.235816	0.179903	-1.3108	0.189926	0.400361	6	DTNBP1	15522807	15663058	dystrobrevin binding protein 1 [Source:HGNC Symbol;Acc:HGNC:17328]	no	no	no	no
ENSG00000047621	1172.83	-0.379218	0.129549	-2.92722	0.00342012	0.0202531	12	C12orf4	4487735	4538508	chromosome 12 open reading frame 4 [Source:HGNC Symbol;Acc:HGNC:1184]	no	no	no	no
ENSG00000047634	797.304	-0.322329	0.103458	-3.11556	0.00183598	0.0122059	X	SCML1	17737449	17754988	Scm polycomb group protein like 1 [Source:HGNC Symbol;Acc:HGNC:10580]	no	no	no	yes
ENSG00000047644	2739.29	0.360073	0.153108	2.35176	0.0186848	0.0769719	X	WWC3	10015254	10144474	WWC family member 3 [Source:HGNC Symbol;Acc:HGNC:29237]	no	no	no	yes
ENSG00000047648	87.1566	-0.443248	0.282183	-1.57078	0.116234	0.288895	X	ARHGAP6	11117651	11665920	Rho GTPase activating protein 6 [Source:HGNC Symbol;Acc:HGNC:676]	no	no	no	yes
ENSG00000047849	30859.9	0.0783334	0.0853811	0.917456	0.358904	0.590124	3	MAP4	47850690	48089272	microtubule associated protein 4 [Source:HGNC Symbol;Acc:HGNC:6862]	no	no	no	no
ENSG00000047932	3470.65	0.13458	0.125234	1.07463	0.282541	0.512967	6	GOPC	117560269	117602542	golgi associated PDZ and coiled-coil motif containing [Source:HGNC Symbol;Acc:HGNC:17643]	no	no	no	no
ENSG00000048028	1225.46	0.0104163	0.133457	0.0780498	0.937788	0.971423	11	USP28	113797874	113875572	ubiquitin specific peptidase 28 [Source:HGNC Symbol;Acc:HGNC:12625]	no	no	no	no
ENSG00000048052	1559.05	-0.423132	0.218714	-1.93464	0.0530347	0.168544	7	HDAC9	18086949	19002416	histone deacetylase 9 [Source:HGNC Symbol;Acc:HGNC:14065]	no	no	no	no
ENSG00000048140	2569.94	-0.213913	0.0748071	-2.85953	0.00424269	0.0241471	5	TSPAN17	176647387	176659054	tetraspanin 17 [Source:HGNC Symbol;Acc:HGNC:13594]	no	no	no	no
ENSG00000048162	547.781	-0.174408	0.13952	-1.25006	0.211279	0.429318	5	NOP16	176383946	176388927	NOP16 nucleolar protein [Source:HGNC Symbol;Acc:HGNC:26934]	no	no	no	no
ENSG00000048342	962.707	-0.107066	0.143414	-0.746552	0.455334	0.672533	4	CC2D2A	15469865	15601552	coiled-coil and C2 domain containing 2A [Source:HGNC Symbol;Acc:HGNC:29253]	no	no	no	no
ENSG00000048392	2021.74	-0.102267	0.100935	-1.0132	0.310963	0.542722	8	RRM2B	102204502	102238961	ribonucleotide reductase regulatory TP53 inducible subunit M2B [Source:HGNC Symbol;Acc:HGNC:17296]	no	no	no	no
ENSG00000048405	872.136	-0.198312	0.115712	-1.71384	0.0865574	0.238635	7	ZNF800	127346790	127431924	zinc finger protein 800 [Source:HGNC Symbol;Acc:HGNC:27267]	no	no	no	no
ENSG00000048471	2290.83	-0.322385	0.188942	-1.70627	0.0879582	0.24073	16	SNX29	11976734	12574287	sorting nexin 29 [Source:HGNC Symbol;Acc:HGNC:30542]	no	no	no	no
ENSG00000048540	24.6433	-3.77855	0.795582	-4.74942	2.04003e-06	3.3183e-05	12	LMO3	16548372	16610594	LIM domain only 3 [Source:HGNC Symbol;Acc:HGNC:6643]	no	no	no	no
ENSG00000048544	1845.91	-0.102341	0.128356	-0.797324	0.425263	0.649576	6	MRPS10	42206807	42217861	mitochondrial ribosomal protein S10 [Source:HGNC Symbol;Acc:HGNC:14502]	no	no	no	no
ENSG00000048649	2287.87	0.0234407	0.136587	0.171617	0.863738	0.931111	11	RSF1	77660009	77820869	remodeling and spacing factor 1 [Source:HGNC Symbol;Acc:HGNC:18118]	no	no	no	no
ENSG00000048707	2970.5	-0.181765	0.144178	-1.2607	0.207418	0.424902	1	VPS13D	12230030	12512047	vacuolar protein sorting 13 homolog D [Source:HGNC Symbol;Acc:HGNC:23595]	no	no	no	no
ENSG00000048740	889.698	2.31631	0.373575	6.2004	5.63196e-10	1.91339e-08	10	CELF2	10798397	11336675	CUGBP Elav-like family member 2 [Source:HGNC Symbol;Acc:HGNC:2550]	no	no	no	no
ENSG00000048828	10051.1	-0.351699	0.108598	-3.23853	0.00120147	0.00853472	9	FAM120A	93451685	93566112	family with sequence similarity 120A [Source:HGNC Symbol;Acc:HGNC:13247]	no	no	no	no
ENSG00000048991	1779.17	-0.198661	0.176281	-1.12696	0.25976	0.486427	2	R3HDM1	135531455	135725270	R3H domain containing 1 [Source:HGNC Symbol;Acc:HGNC:9757]	no	no	no	no
ENSG00000049089	276.607	-1.22652	0.274821	-4.46297	8.083e-06	0.000111938	1	COL9A2	40300489	40317813	collagen type IX alpha 2 chain [Source:HGNC Symbol;Acc:HGNC:2218]	no	no	no	no
ENSG00000049130	3893.18	-0.633782	0.103061	-6.14961	7.7675e-10	2.58328e-08	12	KITLG	88492793	88580851	KIT ligand [Source:HGNC Symbol;Acc:HGNC:6343]	no	no	no	no
ENSG00000049167	437.782	-0.0917519	0.153502	-0.597724	0.550024	0.743108	5	ERCC8	60866454	60945073	ERCC excision repair 8, CSA ubiquitin ligase complex subunit [Source:HGNC Symbol;Acc:HGNC:3439]	no	no	no	no
ENSG00000049192	1211.73	1.28292	0.210284	6.10089	1.05482e-09	3.41327e-08	5	ADAMTS6	65148738	65481920	ADAM metallopeptidase with thrombospondin type 1 motif 6 [Source:HGNC Symbol;Acc:HGNC:222]	no	no	no	no
ENSG00000049239	4947.04	0.110461	0.173458	0.636816	0.524244	0.724253	1	H6PD	9234774	9271337	hexose-6-phosphate dehydrogenase/glucose 1-dehydrogenase [Source:HGNC Symbol;Acc:HGNC:4795]	no	no	no	no
ENSG00000049245	5824.45	-0.117231	0.100204	-1.16992	0.242032	0.466769	1	VAMP3	7771296	7781432	vesicle associated membrane protein 3 [Source:HGNC Symbol;Acc:HGNC:12644]	no	no	no	no
ENSG00000049246	753.489	-0.0127945	0.189402	-0.0675522	0.946142	0.975628	1	PER3	7784291	7845177	period circadian regulator 3 [Source:HGNC Symbol;Acc:HGNC:8847]	no	no	no	no
ENSG00000049323	15522.4	0.65282	0.210304	3.10418	0.0019081	0.0126026	2	LTBP1	32946953	33399509	latent transforming growth factor beta binding protein 1 [Source:HGNC Symbol;Acc:HGNC:6714]	no	no	no	no
ENSG00000049449	7264.01	0.0573865	0.184722	0.310665	0.756056	0.872907	11	RCN1	32091074	32105722	reticulocalbin 1 [Source:HGNC Symbol;Acc:HGNC:9934]	no	no	no	no
ENSG00000049540	37985.1	-2.36218	0.270223	-8.74158	2.29867e-18	2.72734e-16	7	ELN	74027789	74069907	elastin [Source:HGNC Symbol;Acc:HGNC:3327]	no	no	no	no
ENSG00000049541	808.081	-0.406834	0.221285	-1.83851	0.0659878	0.197378	7	RFC2	74231499	74254458	replication factor C subunit 2 [Source:HGNC Symbol;Acc:HGNC:9970]	no	no	no	no
ENSG00000049618	3072.76	0.0930089	0.104451	0.890457	0.373221	0.602841	6	ARID1B	156776020	157210779	AT-rich interaction domain 1B [Source:HGNC Symbol;Acc:HGNC:18040]	no	no	no	no
ENSG00000049656	3899.1	-0.144843	0.0864026	-1.67637	0.0936656	0.25088	5	CLPTM1L	1317752	1345099	CLPTM1 like [Source:HGNC Symbol;Acc:HGNC:24308]	no	no	no	no
ENSG00000049759	375.211	1.51419	0.294109	5.14841	2.62701e-07	5.25802e-06	18	NEDD4L	58044226	58401540	NEDD4 like E3 ubiquitin protein ligase [Source:HGNC Symbol;Acc:HGNC:7728]	no	no	no	no
ENSG00000049769	163.037	0.210119	0.129119	1.62732	0.103668	0.268815	X	PPP1R3F	49269793	49301461	protein phosphatase 1 regulatory subunit 3F [Source:HGNC Symbol;Acc:HGNC:14944]	no	no	no	yes
ENSG00000049860	6366.72	-0.484239	0.15707	-3.08295	0.00204959	0.0133629	5	HEXB	74640023	74722647	hexosaminidase subunit beta [Source:HGNC Symbol;Acc:HGNC:4879]	no	no	no	no
ENSG00000049883	577.98	-0.113519	0.170624	-0.665321	0.505845	0.710687	5	PTCD2	72320367	72368395	pentatricopeptide repeat domain 2 [Source:HGNC Symbol;Acc:HGNC:25734]	no	no	no	no
ENSG00000050130	2034.8	-0.10454	0.128295	-0.814841	0.415163	0.639959	14	JKAMP	59484443	59505410	JNK1/MAPK8 associated membrane protein [Source:HGNC Symbol;Acc:HGNC:20184]	no	no	no	no
ENSG00000050165	30725.4	0.799303	0.122953	6.50087	7.98569e-11	3.20645e-09	11	DKK3	11956207	12009769	dickkopf WNT signaling pathway inhibitor 3 [Source:HGNC Symbol;Acc:HGNC:2893]	no	no	no	no
ENSG00000050327	224.137	0.0131848	0.148349	0.0888766	0.92918	0.96648	7	ARHGEF5	144355288	144380632	Rho guanine nucleotide exchange factor 5 [Source:HGNC Symbol;Acc:HGNC:13209]	no	no	no	no
ENSG00000050344	111.092	0.465619	0.138386	3.36463	0.000766456	0.00590306	7	NFE2L3	26152198	26187137	NFE2 like bZIP transcription factor 3 [Source:HGNC Symbol;Acc:HGNC:7783]	no	no	no	no
ENSG00000050393	1585.69	-0.231209	0.184736	-1.25157	0.210728	0.428615	6	MCUR1	13786557	13814568	mitochondrial calcium uniporter regulator 1 [Source:HGNC Symbol;Acc:HGNC:21097]	no	no	no	no
ENSG00000050405	22138.9	-0.223348	0.162571	-1.37384	0.16949	0.370918	12	LIMA1	50175788	50283520	LIM domain and actin binding 1 [Source:HGNC Symbol;Acc:HGNC:24636]	no	no	no	no
ENSG00000050426	1116.46	-0.196832	0.166344	-1.18328	0.236696	0.460117	12	LETMD1	51047962	51060424	LETM1 domain containing 1 [Source:HGNC Symbol;Acc:HGNC:24241]	no	no	no	no
ENSG00000050438	759.599	-0.0557828	0.191454	-0.291364	0.770773	0.880478	12	SLC4A8	51391317	51515763	solute carrier family 4 member 8 [Source:HGNC Symbol;Acc:HGNC:11034]	no	no	no	no
ENSG00000050628	439.175	-0.738139	0.360159	-2.04948	0.040415	0.138036	1	PTGER3	70852353	71047816	prostaglandin E receptor 3 [Source:HGNC Symbol;Acc:HGNC:9595]	no	no	no	no
ENSG00000050730	63.995	-0.609653	0.377543	-1.61479	0.106356	0.273522	4	TNIP3	121131408	121227466	TNFAIP3 interacting protein 3 [Source:HGNC Symbol;Acc:HGNC:19315]	no	no	no	no
ENSG00000050748	2023.28	-0.260296	0.168848	-1.5416	0.123171	0.300177	5	MAPK9	180233143	180292099	mitogen-activated protein kinase 9 [Source:HGNC Symbol;Acc:HGNC:6886]	no	no	no	no
ENSG00000050767	219.959	7.42605	2.11517	3.51085	0.000446673	0.00377579	5	COL23A1	178237476	178590393	collagen type XXIII alpha 1 chain [Source:HGNC Symbol;Acc:HGNC:22990]	no	no	no	no
ENSG00000050820	4908.47	-0.0694096	0.190261	-0.364813	0.715251	0.848455	16	BCAR1	75228181	75268053	BCAR1 scaffold protein, Cas family member [Source:HGNC Symbol;Acc:HGNC:971]	no	no	no	no
ENSG00000051009	1247.2	0.101216	0.174635	0.579588	0.562192	0.751225	11	FHIP1B	6211345	6234711	FHF complex subunit HOOK interacting protein 1B [Source:HGNC Symbol;Acc:HGNC:25378]	no	no	no	no
ENSG00000051108	5280.97	-0.0905847	0.170979	-0.5298	0.596251	0.774088	16	HERPUD1	56932142	56944864	homocysteine inducible ER protein with ubiquitin like domain 1 [Source:HGNC Symbol;Acc:HGNC:13744]	no	no	no	no
ENSG00000051128	900.859	-0.0950719	0.129921	-0.731768	0.46431	0.679592	19	HOMER3	18929201	18941261	homer scaffold protein 3 [Source:HGNC Symbol;Acc:HGNC:17514]	no	no	no	no
ENSG00000051180	446.675	-0.584592	0.232282	-2.51673	0.0118449	0.0542978	15	RAD51	40694774	40732340	RAD51 recombinase [Source:HGNC Symbol;Acc:HGNC:9817]	no	no	no	no
ENSG00000051341	482.909	-0.13095	0.245452	-0.533505	0.593684	0.772534	3	POLQ	121431431	121545988	DNA polymerase theta [Source:HGNC Symbol;Acc:HGNC:9186]	no	no	no	no
ENSG00000051382	725.66	0.0600941	0.149848	0.401033	0.688396	0.832293	3	PIK3CB	138652698	138834928	phosphatidylinositol-4,5-bisphosphate 3-kinase catalytic subunit beta [Source:HGNC Symbol;Acc:HGNC:8976]	no	no	no	no
ENSG00000051523	1830.08	-0.491336	0.159917	-3.07243	0.0021232	0.0137273	16	CYBA	88643275	88651083	cytochrome b-245 alpha chain [Source:HGNC Symbol;Acc:HGNC:2577]	no	no	no	no
ENSG00000051596	421.091	-0.171572	0.18162	-0.944678	0.344823	0.576969	5	THOC3	175917873	176034680	THO complex subunit 3 [Source:HGNC Symbol;Acc:HGNC:19072]	no	no	no	no
ENSG00000051620	1832.49	0.293607	0.157911	1.85932	0.0629817	0.190682	6	HEBP2	138403531	138422197	heme binding protein 2 [Source:HGNC Symbol;Acc:HGNC:15716]	no	no	no	no
ENSG00000051825	947.165	-0.274343	0.205333	-1.33609	0.181521	0.389289	12	MPHOSPH9	123152320	123244014	M-phase phosphoprotein 9 [Source:HGNC Symbol;Acc:HGNC:7215]	no	no	no	no
ENSG00000052126	1351.86	-0.0155741	0.192622	-0.0808528	0.935559	0.970398	12	PLEKHA5	19129669	19376400	pleckstrin homology domain containing A5 [Source:HGNC Symbol;Acc:HGNC:30036]	no	no	no	no
ENSG00000052723	1778.95	0.00211261	0.162846	0.012973	0.989649	0.9938	1	SIKE1	114769479	114780685	suppressor of IKBKE 1 [Source:HGNC Symbol;Acc:HGNC:26119]	no	no	no	no
ENSG00000052749	1008.97	-0.393385	0.139025	-2.82959	0.00466071	0.0258654	10	RRP12	97356358	97426076	ribosomal RNA processing 12 homolog [Source:HGNC Symbol;Acc:HGNC:29100]	no	no	no	no
ENSG00000052795	1736.11	-0.117834	0.150955	-0.78059	0.435044	0.656905	4	FNIP2	158769026	158908050	folliculin interacting protein 2 [Source:HGNC Symbol;Acc:HGNC:29280]	no	no	no	no
ENSG00000052802	2538.18	0.160126	0.143487	1.11597	0.264437	0.491711	4	MSMO1	165327667	165343164	methylsterol monooxygenase 1 [Source:HGNC Symbol;Acc:HGNC:10545]	no	no	no	no
ENSG00000052841	3222.83	-0.179303	0.137856	-1.30065	0.193377	0.405023	11	TTC17	43358920	43494933	tetratricopeptide repeat domain 17 [Source:HGNC Symbol;Acc:HGNC:25596]	no	no	no	no
ENSG00000052850	93.4975	0.844731	1.15984	0.728317	0.46642	0.680425	11	ALX4	44260440	44310139	ALX homeobox 4 [Source:HGNC Symbol;Acc:HGNC:450]	no	no	no	no
ENSG00000053254	3339.35	0.276096	0.130036	2.12323	0.033735	0.120928	14	FOXN3	89124871	89619149	forkhead box N3 [Source:HGNC Symbol;Acc:HGNC:1928]	no	no	no	no
ENSG00000053371	1716.25	0.00769566	0.146328	0.0525918	0.958057	0.980771	1	AKR7A2	19303965	19312144	aldo-keto reductase family 7 member A2 [Source:HGNC Symbol;Acc:HGNC:389]	no	no	no	no
ENSG00000053372	1596.94	-0.322332	0.172576	-1.86777	0.0617947	0.188325	1	MRTO4	19251805	19260128	MRT4 homolog, ribosome maturation factor [Source:HGNC Symbol;Acc:HGNC:18477]	no	no	no	no
ENSG00000053438	77.7688	1.01673	0.262732	3.86982	0.000108917	0.00111111	20	NNAT	37521206	37523690	neuronatin [Source:HGNC Symbol;Acc:HGNC:7860]	no	no	no	no
ENSG00000053501	508.958	0.00344307	0.153272	0.0224637	0.982078	0.990419	19	USE1	17215346	17219829	unconventional SNARE in the ER 1 [Source:HGNC Symbol;Acc:HGNC:30882]	no	no	no	no
ENSG00000053747	137.609	-1.10766	0.288722	-3.83643	0.000124838	0.00124648	18	LAMA3	23689453	23956222	laminin subunit alpha 3 [Source:HGNC Symbol;Acc:HGNC:6483]	no	no	no	no
ENSG00000053770	1454.54	-0.27391	0.113088	-2.42209	0.0154317	0.0663735	14	AP5M1	57268924	57298742	adaptor related protein complex 5 subunit mu 1 [Source:HGNC Symbol;Acc:HGNC:20192]	no	no	no	no
ENSG00000053900	1269.99	-0.130919	0.121721	-1.07556	0.282123	0.512632	4	ANAPC4	25377263	25418498	anaphase promoting complex subunit 4 [Source:HGNC Symbol;Acc:HGNC:19990]	no	no	no	no
ENSG00000054116	2073.31	0.012345	0.144196	0.0856123	0.931775	0.967495	1	TRAPPC3	36136570	36156053	trafficking protein particle complex subunit 3 [Source:HGNC Symbol;Acc:HGNC:19942]	no	no	no	no
ENSG00000054118	8291.89	0.00934694	0.134592	0.0694466	0.944634	0.975293	1	THRAP3	36224432	36305357	thyroid hormone receptor associated protein 3 [Source:HGNC Symbol;Acc:HGNC:22964]	no	no	no	no
ENSG00000054148	2210.19	-0.0585918	0.165966	-0.353035	0.724062	0.854005	9	PHPT1	136848724	136851027	phosphohistidine phosphatase 1 [Source:HGNC Symbol;Acc:HGNC:30033]	no	no	no	no
ENSG00000054267	1918.72	0.166611	0.138869	1.19977	0.23023	0.452219	1	ARID4B	235131634	235328219	AT-rich interaction domain 4B [Source:HGNC Symbol;Acc:HGNC:15550]	no	no	no	no
ENSG00000054277	93.4957	-0.358381	0.236121	-1.51779	0.129068	0.309736	1	OPN3	241590102	241677376	opsin 3 [Source:HGNC Symbol;Acc:HGNC:14007]	no	no	no	no
ENSG00000054282	1118.84	-0.672956	0.202508	-3.32312	0.000890179	0.00663478	1	SDCCAG8	243256034	243500091	SHH signaling and ciliogenesis regulator SDCCAG8 [Source:HGNC Symbol;Acc:HGNC:10671]	no	no	no	no
ENSG00000054356	1189.67	1.55091	0.543281	2.85471	0.00430764	0.0243483	2	PTPRN	219289623	219309648	protein tyrosine phosphatase receptor type N [Source:HGNC Symbol;Acc:HGNC:9676]	no	no	no	no
ENSG00000054392	188.655	0.0380397	0.259161	0.14678	0.883306	0.942489	1	HHAT	210328252	210676296	hedgehog acyltransferase [Source:HGNC Symbol;Acc:HGNC:18270]	no	no	no	no
ENSG00000054523	4924.82	-0.170136	0.116858	-1.45592	0.145416	0.336932	1	KIF1B	10210570	10381603	kinesin family member 1B [Source:HGNC Symbol;Acc:HGNC:16636]	no	no	no	no
ENSG00000054598	499.452	1.2033	0.249506	4.82274	1.416e-06	2.38474e-05	6	FOXC1	1609915	1613897	forkhead box C1 [Source:HGNC Symbol;Acc:HGNC:3800]	no	no	no	no
ENSG00000054611	1176.6	0.00946496	0.143267	0.0660654	0.947326	0.976323	22	TBC1D22A	46762617	47175699	TBC1 domain family member 22A [Source:HGNC Symbol;Acc:HGNC:1309]	no	no	no	no
ENSG00000054654	500.223	0.422096	0.214474	1.96805	0.0490625	0.158964	14	SYNE2	63761899	64226433	spectrin repeat containing nuclear envelope protein 2 [Source:HGNC Symbol;Acc:HGNC:17084]	no	no	no	no
ENSG00000054793	3076.11	-0.174118	0.132142	-1.31766	0.187619	0.397002	20	ATP9A	51596514	51768390	ATPase phospholipid transporting 9A (putative) [Source:HGNC Symbol;Acc:HGNC:13540]	no	no	no	no
ENSG00000054965	4517.59	0.0753863	0.138477	0.544398	0.586168	0.767684	11	FAM168A	73400487	73598189	family with sequence similarity 168 member A [Source:HGNC Symbol;Acc:HGNC:28999]	no	no	no	no
ENSG00000054967	328.903	-0.214301	0.263692	-0.812696	0.416393	0.641241	11	RELT	73376399	73397474	RELT TNF receptor [Source:HGNC Symbol;Acc:HGNC:13764]	no	no	no	no
ENSG00000054983	1092.47	-0.216853	0.141118	-1.53668	0.124372	0.301732	14	GALC	87837820	87993665	galactosylceramidase [Source:HGNC Symbol;Acc:HGNC:4115]	no	no	no	no
ENSG00000055044	1677.3	-0.243162	0.17013	-1.42927	0.152927	0.347789	2	NOP58	202265736	202303661	NOP58 ribonucleoprotein [Source:HGNC Symbol;Acc:HGNC:29926]	no	no	no	no
ENSG00000055070	6855.97	-0.161017	0.138621	-1.16157	0.245411	0.471009	1	SZRD1	16352575	16398145	SUZ RNA binding domain containing 1 [Source:HGNC Symbol;Acc:HGNC:30232]	no	no	no	no
ENSG00000055130	3129.77	0.0735322	0.10561	0.696263	0.486264	0.696552	7	CUL1	148697914	148801110	cullin 1 [Source:HGNC Symbol;Acc:HGNC:2551]	no	no	no	no
ENSG00000055147	1340.85	-0.131437	0.143467	-0.916152	0.359587	0.590789	5	FAM114A2	153990148	154038936	family with sequence similarity 114 member A2 [Source:HGNC Symbol;Acc:HGNC:1333]	no	no	no	no
ENSG00000055163	342.913	1.71964	0.18186	9.45587	3.20348e-21	5.77942e-19	5	CYFIP2	157266079	157395595	cytoplasmic FMR1 interacting protein 2 [Source:HGNC Symbol;Acc:HGNC:13760]	no	no	no	no
ENSG00000055208	4088.59	-0.0615081	0.150439	-0.408859	0.682643	0.82968	6	TAB2	149218641	149411613	TGF-beta activated kinase 1 (MAP3K7) binding protein 2 [Source:HGNC Symbol;Acc:HGNC:17075]	no	no	no	no
ENSG00000055211	2757.23	-0.355468	0.123425	-2.88002	0.00397648	0.0228991	6	GINM1	149566294	149591748	glycosylated integral membrane protein 1 [Source:HGNC Symbol;Acc:HGNC:21074]	no	no	no	no
ENSG00000055332	4697.14	0.475319	0.21177	2.2445	0.0248002	0.0949484	2	EIF2AK2	37099210	37157522	eukaryotic translation initiation factor 2 alpha kinase 2 [Source:HGNC Symbol;Acc:HGNC:9437]	no	no	no	no
ENSG00000055483	2255.91	-0.0414794	0.176533	-0.234967	0.814235	0.903286	17	USP36	78787381	78841441	ubiquitin specific peptidase 36 [Source:HGNC Symbol;Acc:HGNC:20062]	no	no	no	no
ENSG00000055609	3091.53	0.00807955	0.148341	0.0544659	0.956564	0.980144	7	KMT2C	152134922	152436644	lysine methyltransferase 2C [Source:HGNC Symbol;Acc:HGNC:13726]	no	no	no	no
ENSG00000055813	487.424	-3.43031	0.323307	-10.61	2.67609e-26	7.83201e-24	2	CCDC85A	56183990	56386172	coiled-coil domain containing 85A [Source:HGNC Symbol;Acc:HGNC:29400]	no	no	no	no
ENSG00000055917	3708.14	-0.163751	0.152349	-1.07485	0.282444	0.512861	2	PUM2	20248691	20352234	pumilio RNA binding family member 2 [Source:HGNC Symbol;Acc:HGNC:14958]	no	no	no	no
ENSG00000055950	1353.96	0.0926813	0.116691	0.794248	0.427051	0.650279	10	MRPL43	100969458	100987515	mitochondrial ribosomal protein L43 [Source:HGNC Symbol;Acc:HGNC:14517]	no	no	no	no
ENSG00000056050	877.413	-0.275997	0.193157	-1.42887	0.15304	0.347987	4	HPF1	169729470	169757944	histone PARylation factor 1 [Source:HGNC Symbol;Acc:HGNC:26051]	no	no	no	no
ENSG00000056097	5434.57	-0.240776	0.156844	-1.53514	0.124751	0.302405	5	ZFR	32354350	32444740	zinc finger RNA binding protein [Source:HGNC Symbol;Acc:HGNC:17277]	no	no	no	no
ENSG00000056277	224.982	-0.366171	0.111654	-3.27951	0.00103986	0.0075621	X	ZNF280C	130202707	130268899	zinc finger protein 280C [Source:HGNC Symbol;Acc:HGNC:25955]	no	no	yes	no
ENSG00000056558	217.568	0.622523	0.219205	2.83991	0.00451259	0.0252897	9	TRAF1	120902393	120929173	TNF receptor associated factor 1 [Source:HGNC Symbol;Acc:HGNC:12031]	no	no	no	no
ENSG00000056586	3738.25	-0.0341058	0.146129	-0.233395	0.815455	0.903998	9	RC3H2	122844556	122905359	ring finger and CCCH-type domains 2 [Source:HGNC Symbol;Acc:HGNC:21461]	no	no	no	no
ENSG00000056736	110.525	0.313158	0.218842	1.43098	0.152437	0.347525	3	IL17RB	53846568	53865794	interleukin 17 receptor B [Source:HGNC Symbol;Acc:HGNC:18015]	no	no	no	no
ENSG00000056972	1513.56	0.198126	0.113107	1.75166	0.0798323	0.226203	6	TRAF3IP2	111555381	111606906	TRAF3 interacting protein 2 [Source:HGNC Symbol;Acc:HGNC:1343]	no	no	no	no
ENSG00000056998	151.503	0.0762563	0.320381	0.238018	0.811867	0.902075	X	GYG2	2828822	2882820	glycogenin 2 [Source:HGNC Symbol;Acc:HGNC:4700]	no	yes	no	no
ENSG00000057019	11251.6	-0.0864341	0.201226	-0.429536	0.667533	0.81933	3	DCBLD2	98795941	98901695	discoidin, CUB and LCCL domain containing 2 [Source:HGNC Symbol;Acc:HGNC:24627]	no	no	no	no
ENSG00000057252	3239.33	-0.706917	0.157295	-4.49422	6.98244e-06	9.85624e-05	1	SOAT1	179293714	179358680	sterol O-acyltransferase 1 [Source:HGNC Symbol;Acc:HGNC:11177]	no	no	no	no
ENSG00000057608	12078.2	-0.0230657	0.169924	-0.135742	0.892026	0.947953	10	GDI2	5765223	5842132	GDP dissociation inhibitor 2 [Source:HGNC Symbol;Acc:HGNC:4227]	no	no	no	no
ENSG00000057657	420.184	0.877115	0.287489	3.05095	0.00228122	0.0145812	6	PRDM1	105993463	106109939	PR/SET domain 1 [Source:HGNC Symbol;Acc:HGNC:9346]	no	no	no	no
ENSG00000057663	1352.63	-0.105691	0.156388	-0.675828	0.49915	0.70637	6	ATG5	106045423	106325791	autophagy related 5 [Source:HGNC Symbol;Acc:HGNC:589]	no	no	no	no
ENSG00000057757	1415.15	-0.441011	0.1652	-2.66955	0.00759524	0.038458	1	PITHD1	23778418	23788232	PITH domain containing 1 [Source:HGNC Symbol;Acc:HGNC:25022]	no	no	no	no
ENSG00000057935	1304.91	0.0794825	0.152768	0.520282	0.602867	0.778179	2	MTA3	42494569	42756947	metastasis associated 1 family member 3 [Source:HGNC Symbol;Acc:HGNC:23784]	no	no	no	no
ENSG00000058056	1506.96	-0.595828	0.208257	-2.86102	0.00422275	0.0240543	3	USP13	179653032	179804366	ubiquitin specific peptidase 13 [Source:HGNC Symbol;Acc:HGNC:12611]	no	no	no	no
ENSG00000058063	3591.16	-0.430207	0.118483	-3.63097	0.000282362	0.00254357	3	ATP11B	182793503	182921629	ATPase phospholipid transporting 11B (putative) [Source:HGNC Symbol;Acc:HGNC:13553]	no	no	no	no
ENSG00000058085	203.617	-0.168812	0.142518	-1.18449	0.236218	0.459322	1	LAMC2	183186238	183245127	laminin subunit gamma 2 [Source:HGNC Symbol;Acc:HGNC:6493]	no	no	no	no
ENSG00000058091	1299.31	-0.340645	0.129771	-2.62497	0.00866567	0.0427282	7	CDK14	90466424	91210590	cyclin dependent kinase 14 [Source:HGNC Symbol;Acc:HGNC:8883]	no	no	no	no
ENSG00000058262	27560.9	-0.1144	0.0976463	-1.17158	0.241366	0.466031	3	SEC61A1	128051641	128071705	SEC61 translocon subunit alpha 1 [Source:HGNC Symbol;Acc:HGNC:18276]	no	no	no	no
ENSG00000058272	10584.2	0.0967082	0.163674	0.59086	0.554614	0.746784	12	PPP1R12A	79773563	79935460	protein phosphatase 1 regulatory subunit 12A [Source:HGNC Symbol;Acc:HGNC:7618]	no	no	no	no
ENSG00000058453	1377.43	0.0580414	0.17429	0.333017	0.739121	0.863255	1	CROCC	16740273	16972964	ciliary rootlet coiled-coil, rootletin [Source:HGNC Symbol;Acc:HGNC:21299]	no	no	no	no
ENSG00000058600	824.398	-0.00588163	0.154041	-0.0381824	0.969542	0.985932	16	POLR3E	22297375	22335101	RNA polymerase III subunit E [Source:HGNC Symbol;Acc:HGNC:30347]	no	no	no	no
ENSG00000058668	25740.2	0.271899	0.121055	2.24608	0.0246991	0.0946979	1	ATP2B4	203626832	203744081	ATPase plasma membrane Ca2+ transporting 4 [Source:HGNC Symbol;Acc:HGNC:817]	no	no	no	no
ENSG00000058729	1322.02	-0.311991	0.135245	-2.30685	0.0210631	0.0840424	5	RIOK2	97160867	97183247	RIO kinase 2 [Source:HGNC Symbol;Acc:HGNC:18999]	no	no	no	no
ENSG00000058799	673.884	0.0250597	0.124145	0.201859	0.840027	0.918019	1	YIPF1	53851719	53889798	Yip1 domain family member 1 [Source:HGNC Symbol;Acc:HGNC:25231]	no	no	no	no
ENSG00000058804	1021.65	-0.345076	0.213725	-1.61458	0.106401	0.273585	1	NDC1	53765478	53838463	NDC1 transmembrane nucleoporin [Source:HGNC Symbol;Acc:HGNC:25525]	no	no	no	no
ENSG00000059122	1688.21	-0.126458	0.159929	-0.790712	0.429112	0.652121	16	FLYWCH1	2911931	2951208	FLYWCH-type zinc finger 1 [Source:HGNC Symbol;Acc:HGNC:25404]	no	no	no	no
ENSG00000059145	774.155	-0.172423	0.187293	-0.920606	0.357256	0.588574	16	UNKL	1363205	1414751	unk like zinc finger [Source:HGNC Symbol;Acc:HGNC:14184]	no	no	no	no
ENSG00000059378	532.7	0.750442	0.234365	3.20202	0.00136467	0.00952955	7	PARP12	140023749	140062951	poly(ADP-ribose) polymerase family member 12 [Source:HGNC Symbol;Acc:HGNC:21919]	no	no	no	no
ENSG00000059573	5551.61	0.0368508	0.13193	0.27932	0.779999	0.884606	10	ALDH18A1	95605941	95656711	aldehyde dehydrogenase 18 family member A1 [Source:HGNC Symbol;Acc:HGNC:9722]	no	no	no	no
ENSG00000059588	1217.32	0.0329648	0.147416	0.223618	0.823055	0.907904	1	TARBP1	234391313	234479179	TAR (HIV-1) RNA binding protein 1 [Source:HGNC Symbol;Acc:HGNC:11568]	no	no	no	no
ENSG00000059691	737.161	-0.0498166	0.185252	-0.268913	0.787997	0.888783	4	GATB	151670504	151761007	glutamyl-tRNA amidotransferase subunit B [Source:HGNC Symbol;Acc:HGNC:8849]	no	no	no	no
ENSG00000059728	367.138	-0.158314	0.111131	-1.42457	0.154281	0.3496	2	MXD1	69897688	69942945	MAX dimerization protein 1 [Source:HGNC Symbol;Acc:HGNC:6761]	no	no	no	no
ENSG00000059758	2013.46	0.0249037	0.152751	0.163035	0.870491	0.935103	12	CDK17	96278261	96400480	cyclin dependent kinase 17 [Source:HGNC Symbol;Acc:HGNC:8750]	no	no	no	no
ENSG00000059769	492.659	0.122127	0.120336	1.01488	0.310161	0.541753	9	DNAJC25	111631334	111654351	DnaJ heat shock protein family (Hsp40) member C25 [Source:HGNC Symbol;Acc:HGNC:34187]	no	no	no	no
ENSG00000059804	3898.33	0.035786	0.142775	0.250645	0.802088	0.896275	12	SLC2A3	7919230	7936187	solute carrier family 2 member 3 [Source:HGNC Symbol;Acc:HGNC:11007]	no	no	no	no
ENSG00000060069	984.387	-0.0522528	0.15101	-0.346023	0.729325	0.857252	18	CTDP1	79679803	79754503	CTD phosphatase subunit 1 [Source:HGNC Symbol;Acc:HGNC:2498]	no	no	no	no
ENSG00000060138	6458.33	-0.047896	0.0834507	-0.573943	0.566006	0.75395	12	YBX3	10699089	10723323	Y-box binding protein 3 [Source:HGNC Symbol;Acc:HGNC:2428]	no	no	no	no
ENSG00000060140	46.9401	-1.64603	0.274221	-6.00257	1.94218e-09	5.92094e-08	12	STYK1	10618923	10674318	serine/threonine/tyrosine kinase 1 [Source:HGNC Symbol;Acc:HGNC:18889]	no	no	no	no
ENSG00000060237	9602.06	-0.35916	0.161664	-2.22165	0.0263072	0.099555	12	WNK1	752579	911452	WNK lysine deficient protein kinase 1 [Source:HGNC Symbol;Acc:HGNC:14540]	no	no	no	no
ENSG00000060339	4324.45	-5.62925e-06	0.084741	-6.64289e-05	0.999947	0.999947	10	CCAR1	68721012	68792377	cell division cycle and apoptosis regulator 1 [Source:HGNC Symbol;Acc:HGNC:24236]	no	no	no	no
ENSG00000060491	1906.62	0.167054	0.134305	1.24384	0.213559	0.431973	20	OGFR	62804835	62814000	opioid growth factor receptor [Source:HGNC Symbol;Acc:HGNC:15768]	no	no	no	no
ENSG00000060642	520.472	0.118932	0.133114	0.893459	0.371611	0.601703	1	PIGV	26787054	26800659	phosphatidylinositol glycan anchor biosynthesis class V [Source:HGNC Symbol;Acc:HGNC:26031]	no	no	no	no
ENSG00000060656	1110.93	0.763847	0.259923	2.93874	0.00329544	0.0196652	1	PTPRU	29236516	29326813	protein tyrosine phosphatase receptor type U [Source:HGNC Symbol;Acc:HGNC:9683]	no	no	no	no
ENSG00000060688	1037.87	-0.156135	0.170173	-0.917506	0.358877	0.590124	1	SNRNP40	31259568	31296788	small nuclear ribonucleoprotein U5 subunit 40 [Source:HGNC Symbol;Acc:HGNC:30857]	no	no	no	no
ENSG00000060718	19084.5	-0.99376	0.724571	-1.37151	0.170214	0.371885	1	COL11A1	102876467	103108872	collagen type XI alpha 1 chain [Source:HGNC Symbol;Acc:HGNC:2186]	no	no	no	no
ENSG00000060749	2480.71	-0.18864	0.164367	-1.14767	0.251104	0.477006	11	QSER1	32892811	32993316	glutamine and serine rich 1 [Source:HGNC Symbol;Acc:HGNC:26154]	no	no	no	no
ENSG00000060762	722.739	-0.52957	0.12261	-4.31915	1.56631e-05	0.000199115	6	MPC1	166364919	166383013	mitochondrial pyruvate carrier 1 [Source:HGNC Symbol;Acc:HGNC:21606]	no	no	no	no
ENSG00000060971	1166.4	-0.205584	0.0706682	-2.90914	0.00362424	0.0212706	3	ACAA1	38103129	38137242	acetyl-CoA acyltransferase 1 [Source:HGNC Symbol;Acc:HGNC:82]	no	no	no	no
ENSG00000060982	9734.31	0.533376	0.178508	2.98796	0.00280842	0.0172836	12	BCAT1	24810024	24949101	branched chain amino acid transaminase 1 [Source:HGNC Symbol;Acc:HGNC:976]	no	no	no	no
ENSG00000061273	6800.78	-0.054035	0.149346	-0.361812	0.717493	0.849688	12	HDAC7	47782722	47833132	histone deacetylase 7 [Source:HGNC Symbol;Acc:HGNC:14067]	no	no	no	no
ENSG00000061337	1415.77	0.489263	0.291906	1.6761	0.0937192	0.250921	8	LZTS1	20246165	20303963	leucine zipper tumor suppressor 1 [Source:HGNC Symbol;Acc:HGNC:13861]	no	no	no	no
ENSG00000061656	206.696	0.778905	0.203221	3.83279	0.000126697	0.00126409	20	SPAG4	35615829	35621094	sperm associated antigen 4 [Source:HGNC Symbol;Acc:HGNC:11214]	no	no	no	no
ENSG00000061676	11732.9	-0.133825	0.135648	-0.986561	0.323858	0.556237	2	NCKAP1	182909115	183038858	NCK associated protein 1 [Source:HGNC Symbol;Acc:HGNC:7666]	no	no	no	no
ENSG00000061794	1886.01	-0.123653	0.169764	-0.72838	0.466381	0.680425	12	MRPS35	27710822	27756295	mitochondrial ribosomal protein S35 [Source:HGNC Symbol;Acc:HGNC:16635]	no	no	no	no
ENSG00000061918	117.055	0.899691	0.225198	3.99511	6.46639e-05	0.000704987	4	GUCY1B1	155758992	155807811	guanylate cyclase 1 soluble subunit beta 1 [Source:HGNC Symbol;Acc:HGNC:4687]	no	no	no	no
ENSG00000061936	2617.56	0.169571	0.122088	1.38892	0.164857	0.364436	12	SFSWAP	131711081	131799738	splicing factor SWAP [Source:HGNC Symbol;Acc:HGNC:10790]	no	no	no	no
ENSG00000061938	1700.73	-0.142851	0.189734	-0.752904	0.451508	0.670239	3	TNK2	195863364	195911945	tyrosine kinase non receptor 2 [Source:HGNC Symbol;Acc:HGNC:19297]	no	no	no	no
ENSG00000061987	3594.12	-0.0505902	0.152989	-0.330678	0.740888	0.864566	12	MON2	62466817	62600476	MON2 homolog, regulator of endosome-to-Golgi trafficking [Source:HGNC Symbol;Acc:HGNC:29177]	no	no	no	no
ENSG00000062038	25.0236	-2.63459	0.913025	-2.88556	0.00390716	0.0226584	16	CDH3	68636189	68727468	cadherin 3 [Source:HGNC Symbol;Acc:HGNC:1762]	no	no	no	no
ENSG00000062194	2242.89	0.0319922	0.166265	0.192417	0.847416	0.922883	5	GPBP1	57173948	57264679	GC-rich promoter binding protein 1 [Source:HGNC Symbol;Acc:HGNC:29520]	no	no	no	no
ENSG00000062370	284.672	0.254534	0.165188	1.54087	0.123348	0.300442	19	ZNF112	44326555	44367217	zinc finger protein 112 [Source:HGNC Symbol;Acc:HGNC:12892]	no	no	no	no
ENSG00000062485	6453.71	-0.329873	0.180321	-1.82936	0.0673454	0.200037	12	CS	56271699	56300391	citrate synthase [Source:HGNC Symbol;Acc:HGNC:2422]	no	no	no	no
ENSG00000062524	154.867	2.29179	0.429928	5.33063	9.78726e-08	2.10053e-06	15	LTK	41503637	41513887	leukocyte receptor tyrosine kinase [Source:HGNC Symbol;Acc:HGNC:6721]	no	no	no	no
ENSG00000062598	1851.02	-0.209608	0.171513	-1.22211	0.221665	0.441993	20	ELMO2	46366050	46432985	engulfment and cell motility 2 [Source:HGNC Symbol;Acc:HGNC:17233]	no	no	no	no
ENSG00000062650	2789.47	-0.157329	0.145748	-1.07946	0.280382	0.510667	10	WAPL	86435256	86521792	WAPL cohesin release factor [Source:HGNC Symbol;Acc:HGNC:23293]	no	no	no	no
ENSG00000062716	9445.01	0.933499	0.135409	6.89394	5.42694e-12	2.6085e-10	17	VMP1	59707192	59842255	vacuole membrane protein 1 [Source:HGNC Symbol;Acc:HGNC:29559]	no	no	no	no
ENSG00000062725	2426.33	-0.0923808	0.173516	-0.532405	0.594446	0.773018	17	APPBP2	60443158	60526242	amyloid beta precursor protein binding protein 2 [Source:HGNC Symbol;Acc:HGNC:622]	no	no	no	no
ENSG00000062822	724.516	0.0244748	0.165733	0.147676	0.882598	0.942208	19	POLD1	50384204	50418018	DNA polymerase delta 1, catalytic subunit [Source:HGNC Symbol;Acc:HGNC:9175]	no	no	no	no
ENSG00000063046	15009.8	0.186395	0.166968	1.11636	0.26427	0.491711	12	EIF4B	53006282	53042215	eukaryotic translation initiation factor 4B [Source:HGNC Symbol;Acc:HGNC:3285]	no	no	no	no
ENSG00000063169	888.839	0.0143449	0.177609	0.0807668	0.935627	0.970398	19	BICRA	47608196	47703277	BRD4 interacting chromatin remodeling complex associated protein [Source:HGNC Symbol;Acc:HGNC:4332]	no	no	no	no
ENSG00000063176	669.52	-0.133402	0.122387	-1.09	0.275714	0.505136	19	SPHK2	48619291	48630717	sphingosine kinase 2 [Source:HGNC Symbol;Acc:HGNC:18859]	no	no	no	no
ENSG00000063177	14204.8	0.116774	0.139175	0.839049	0.401442	0.627536	19	RPL18	48615328	48619184	ribosomal protein L18 [Source:HGNC Symbol;Acc:HGNC:10310]	no	no	no	no
ENSG00000063241	1185.41	-0.0441767	0.126499	-0.349224	0.726921	0.856121	19	ISOC2	55452985	55462343	isochorismatase domain containing 2 [Source:HGNC Symbol;Acc:HGNC:26278]	no	no	no	no
ENSG00000063244	7321.69	0.0402124	0.10271	0.391513	0.695418	0.836804	19	U2AF2	55654146	55674716	U2 small nuclear RNA auxiliary factor 2 [Source:HGNC Symbol;Acc:HGNC:23156]	no	no	no	no
ENSG00000063245	6078.06	-0.0141997	0.117705	-0.120638	0.903978	0.953933	19	EPN1	55675226	55709858	epsin 1 [Source:HGNC Symbol;Acc:HGNC:21604]	no	no	no	no
ENSG00000063322	1866.84	-0.24412	0.105618	-2.31135	0.0208137	0.0833687	19	MED29	39391303	39400641	mediator complex subunit 29 [Source:HGNC Symbol;Acc:HGNC:23074]	no	no	no	no
ENSG00000063438	145.724	0.307328	0.209527	1.46677	0.142438	0.331961	5	AHRR	321714	438291	aryl hydrocarbon receptor repressor [Source:HGNC Symbol;Acc:HGNC:346]	no	no	no	no
ENSG00000063587	1617.21	0.23085	0.126537	1.82437	0.0680964	0.201535	X	ZNF275	153334147	153360110	zinc finger protein 275 [Source:HGNC Symbol;Acc:HGNC:13069]	no	no	no	yes
ENSG00000063601	1045.1	0.0443641	0.180438	0.24587	0.805783	0.898422	X	MTMR1	150692971	150765108	myotubularin related protein 1 [Source:HGNC Symbol;Acc:HGNC:7449]	no	no	no	yes
ENSG00000063660	12666.3	-1.3419	0.176688	-7.59474	3.08418e-14	2.07238e-12	2	GPC1	240435663	240468076	glypican 1 [Source:HGNC Symbol;Acc:HGNC:4449]	no	no	no	no
ENSG00000063761	236.263	0.123016	0.128139	0.960015	0.337048	0.568339	14	ADCK1	77800109	77935014	aarF domain containing kinase 1 [Source:HGNC Symbol;Acc:HGNC:19038]	no	no	no	no
ENSG00000063854	697.256	0.0256156	0.134135	0.190968	0.848551	0.923234	16	HAGH	1795620	1827157	hydroxyacylglutathione hydrolase [Source:HGNC Symbol;Acc:HGNC:4805]	no	no	no	no
ENSG00000063978	3357.47	-0.133486	0.183298	-0.728246	0.466463	0.680425	4	RNF4	2462220	2515857	ring finger protein 4 [Source:HGNC Symbol;Acc:HGNC:10067]	no	no	no	no
ENSG00000064012	590.159	-0.325728	0.0879274	-3.7045	0.000211804	0.00198115	2	CASP8	201233443	201361836	caspase 8 [Source:HGNC Symbol;Acc:HGNC:1509]	no	no	no	no
ENSG00000064042	1044.66	-1.92998	0.27142	-7.11069	1.15468e-12	6.23241e-11	4	LIMCH1	41359607	41700044	LIM and calponin homology domains 1 [Source:HGNC Symbol;Acc:HGNC:29191]	no	no	no	no
ENSG00000064102	1238.72	0.0398942	0.173616	0.229784	0.818259	0.905434	12	INTS13	26905181	26938326	integrator complex subunit 13 [Source:HGNC Symbol;Acc:HGNC:20174]	no	no	no	no
ENSG00000064115	1907.12	-0.613904	0.0744899	-8.24144	1.7015e-16	1.51425e-14	12	TM7SF3	26971579	27014434	transmembrane 7 superfamily member 3 [Source:HGNC Symbol;Acc:HGNC:23049]	no	no	no	no
ENSG00000064195	39.4253	-2.23769	0.703765	-3.17959	0.00147484	0.0101588	17	DLX3	49990005	49995224	distal-less homeobox 3 [Source:HGNC Symbol;Acc:HGNC:2916]	no	no	no	no
ENSG00000064199	140.733	-0.349338	0.152314	-2.29354	0.0218169	0.0861813	11	SPA17	124673844	124697518	sperm autoantigenic protein 17 [Source:HGNC Symbol;Acc:HGNC:11210]	no	no	no	no
ENSG00000064205	405.348	1.32938	0.860767	1.54442	0.122488	0.299043	20	CCN5	44714844	44728509	cellular communication network factor 5 [Source:HGNC Symbol;Acc:HGNC:12770]	no	no	no	no
ENSG00000064225	57.7443	-0.150211	0.257118	-0.584208	0.55908	0.749122	3	ST3GAL6	98732236	98821201	ST3 beta-galactoside alpha-2,3-sialyltransferase 6 [Source:HGNC Symbol;Acc:HGNC:18080]	no	no	no	no
ENSG00000064300	137.845	0.788725	0.855628	0.921808	0.356629	0.587848	17	NGFR	49495293	49515008	nerve growth factor receptor [Source:HGNC Symbol;Acc:HGNC:7809]	no	no	no	no
ENSG00000064309	606.48	1.93643	0.331746	5.83707	5.31255e-09	1.49182e-07	11	CDON	125955796	126063335	cell adhesion associated, oncogene regulated [Source:HGNC Symbol;Acc:HGNC:17104]	no	no	no	no
ENSG00000064313	2213.27	-0.254944	0.152919	-1.66719	0.0954772	0.254181	8	TAF2	119730774	119832863	TATA-box binding protein associated factor 2 [Source:HGNC Symbol;Acc:HGNC:11536]	no	no	no	no
ENSG00000064393	2780.1	-0.0520453	0.193312	-0.269229	0.787753	0.888779	7	HIPK2	139561570	139777998	homeodomain interacting protein kinase 2 [Source:HGNC Symbol;Acc:HGNC:14402]	no	no	no	no
ENSG00000064419	2999.21	-0.182238	0.167091	-1.09065	0.275426	0.504852	7	TNPO3	128954180	129055173	transportin 3 [Source:HGNC Symbol;Acc:HGNC:17103]	no	no	no	no
ENSG00000064490	796.04	0.047383	0.079258	0.597832	0.549952	0.743087	19	RFXANK	19192229	19201869	regulatory factor X associated ankyrin containing protein [Source:HGNC Symbol;Acc:HGNC:9987]	no	no	no	no
ENSG00000064545	668.274	-0.11876	0.165767	-0.716427	0.473728	0.686642	19	TMEM161A	19119169	19138513	transmembrane protein 161A [Source:HGNC Symbol;Acc:HGNC:26020]	no	no	no	no
ENSG00000064547	100.156	-0.216012	0.291667	-0.740612	0.458929	0.67577	19	LPAR2	19623655	19628930	lysophosphatidic acid receptor 2 [Source:HGNC Symbol;Acc:HGNC:3168]	no	no	no	no
ENSG00000064601	9327.44	-0.441509	0.217683	-2.02822	0.0425381	0.143281	20	CTSA	45890144	45898949	cathepsin A [Source:HGNC Symbol;Acc:HGNC:9251]	no	no	no	no
ENSG00000064607	6021.33	0.0219389	0.124982	0.175536	0.860658	0.92924	19	SUGP2	18990888	19034023	SURP and G-patch domain containing 2 [Source:HGNC Symbol;Acc:HGNC:18641]	no	no	no	no
ENSG00000064651	1039.93	-0.432631	0.152753	-2.83222	0.00462254	0.0256958	5	SLC12A2	128083766	128189677	solute carrier family 12 member 2 [Source:HGNC Symbol;Acc:HGNC:10911]	no	no	no	no
ENSG00000064652	629.673	-0.113686	0.191841	-0.592604	0.553446	0.745971	5	SNX24	122843439	123029354	sorting nexin 24 [Source:HGNC Symbol;Acc:HGNC:21533]	no	no	no	no
ENSG00000064655	123.453	-0.917909	0.593115	-1.54761	0.121717	0.29768	20	EYA2	46894624	47188844	EYA transcriptional coactivator and phosphatase 2 [Source:HGNC Symbol;Acc:HGNC:3520]	no	no	no	no
ENSG00000064666	23900	-0.346241	0.190522	-1.81733	0.0691659	0.20383	19	CNN2	1026586	1039068	calponin 2 [Source:HGNC Symbol;Acc:HGNC:2156]	no	no	no	no
ENSG00000064687	184.499	-1.71542	0.258165	-6.64467	3.03906e-11	1.30311e-09	19	ABCA7	1039997	1065572	ATP binding cassette subfamily A member 7 [Source:HGNC Symbol;Acc:HGNC:37]	no	no	no	no
ENSG00000064692	70.4613	1.85359	0.307155	6.0347	1.59258e-09	4.98202e-08	5	SNCAIP	122311354	122464219	synuclein alpha interacting protein [Source:HGNC Symbol;Acc:HGNC:11139]	no	no	no	no
ENSG00000064703	1097.07	-0.650149	0.215248	-3.02046	0.00252387	0.0158509	1	DDX20	111754832	111775602	DEAD-box helicase 20 [Source:HGNC Symbol;Acc:HGNC:2743]	no	no	no	no
ENSG00000064726	3459.2	-0.3336	0.154608	-2.15772	0.0309497	0.11313	15	BTBD1	83016423	83067252	BTB domain containing 1 [Source:HGNC Symbol;Acc:HGNC:1120]	no	no	no	no
ENSG00000064763	339.417	1.45428	0.29871	4.86853	1.12432e-06	1.95864e-05	12	FAR2	29149016	29341121	fatty acyl-CoA reductase 2 [Source:HGNC Symbol;Acc:HGNC:25531]	no	no	no	no
ENSG00000064787	41.2957	2.73116	0.739612	3.69269	0.000221894	0.00206381	20	BCAS1	53936777	54070594	brain enriched myelin associated protein 1 [Source:HGNC Symbol;Acc:HGNC:974]	no	no	no	no
ENSG00000064932	2660.51	0.219743	0.161406	1.36143	0.173377	0.377105	19	SBNO2	1107637	1174268	strawberry notch homolog 2 [Source:HGNC Symbol;Acc:HGNC:29158]	no	no	no	no
ENSG00000064933	809.117	0.211585	0.135018	1.56709	0.117094	0.290148	2	PMS1	189784085	189877629	PMS1 homolog 1, mismatch repair system component [Source:HGNC Symbol;Acc:HGNC:9121]	no	no	no	no
ENSG00000064961	2478.85	-0.00624035	0.103663	-0.0601985	0.951998	0.978276	19	HMG20B	3572777	3579088	high mobility group 20B [Source:HGNC Symbol;Acc:HGNC:5002]	no	no	no	no
ENSG00000064995	791.425	0.242515	0.121847	1.99032	0.0465554	0.153369	6	TAF11	34877462	34889192	TATA-box binding protein associated factor 11 [Source:HGNC Symbol;Acc:HGNC:11544]	no	no	no	no
ENSG00000064999	1085.2	-0.184243	0.22634	-0.814011	0.415638	0.640304	6	ANKS1A	34889255	35091406	ankyrin repeat and sterile alpha motif domain containing 1A [Source:HGNC Symbol;Acc:HGNC:20961]	no	no	no	no
ENSG00000065000	9632.03	-0.185808	0.163941	-1.13339	0.257052	0.483801	19	AP3D1	2100988	2164468	adaptor related protein complex 3 subunit delta 1 [Source:HGNC Symbol;Acc:HGNC:568]	no	no	no	no
ENSG00000065029	1077	0.0330259	0.125083	0.264033	0.791755	0.890242	6	ZNF76	35258909	35295985	zinc finger protein 76 [Source:HGNC Symbol;Acc:HGNC:13149]	no	no	no	no
ENSG00000065054	3651.25	0.441043	0.243738	1.8095	0.0703735	0.206386	16	SLC9A3R2	2025356	2039026	SLC9A3 regulator 2 [Source:HGNC Symbol;Acc:HGNC:11076]	no	no	no	no
ENSG00000065057	338.744	0.110861	0.178424	0.621332	0.534381	0.731884	16	NTHL1	2039815	2047866	nth like DNA glycosylase 1 [Source:HGNC Symbol;Acc:HGNC:8028]	no	no	no	no
ENSG00000065060	904.277	0.00385947	0.206653	0.0186761	0.985099	0.991899	6	BLTP3A	34792083	34877514	bridge-like lipid transfer protein family member 3A [Source:HGNC Symbol;Acc:HGNC:21216]	no	no	no	no
ENSG00000065135	5610	-0.105053	0.163033	-0.644366	0.519338	0.721644	1	GNAI3	109548615	109600195	G protein subunit alpha i3 [Source:HGNC Symbol;Acc:HGNC:4387]	no	no	no	no
ENSG00000065150	16397.9	-0.148642	0.157074	-0.94632	0.343985	0.576153	13	IPO5	97953658	98024296	importin 5 [Source:HGNC Symbol;Acc:HGNC:6402]	no	no	no	no
ENSG00000065154	6829.22	-0.210989	0.0471145	-4.4782	7.52734e-06	0.000105127	10	OAT	124397303	124418976	ornithine aminotransferase [Source:HGNC Symbol;Acc:HGNC:8091]	no	no	no	no
ENSG00000065183	1466.93	-0.297168	0.157296	-1.88923	0.0588617	0.181846	1	WDR3	117929720	117966543	WD repeat domain 3 [Source:HGNC Symbol;Acc:HGNC:12755]	no	no	no	no
ENSG00000065243	2733.21	-0.265885	0.103199	-2.57642	0.00998289	0.0474809	1	PKN2	88684222	88836255	protein kinase N2 [Source:HGNC Symbol;Acc:HGNC:9406]	no	no	no	no
ENSG00000065268	900.184	0.410263	0.129395	3.17061	0.00152117	0.0104018	19	WDR18	984332	998438	WD repeat domain 18 [Source:HGNC Symbol;Acc:HGNC:17956]	no	no	no	no
ENSG00000065308	25829.2	-0.111147	0.110398	-1.00679	0.314037	0.546349	6	TRAM2	52497408	52577060	translocation associated membrane protein 2 [Source:HGNC Symbol;Acc:HGNC:16855]	no	no	no	no
ENSG00000065320	182.016	3.45808	0.535998	6.45165	1.10635e-10	4.34945e-09	17	NTN1	9021510	9244000	netrin 1 [Source:HGNC Symbol;Acc:HGNC:8029]	no	no	no	no
ENSG00000065328	409.563	-0.752576	0.263955	-2.85115	0.00435615	0.0245383	10	MCM10	13161558	13211110	minichromosome maintenance 10 replication initiation factor [Source:HGNC Symbol;Acc:HGNC:18043]	no	no	no	no
ENSG00000065357	2537.81	0.0727269	0.0957556	0.759505	0.44755	0.667311	12	DGKA	55927319	55954027	diacylglycerol kinase alpha [Source:HGNC Symbol;Acc:HGNC:2849]	no	no	no	no
ENSG00000065413	634.622	-0.938761	0.233954	-4.01258	6.00578e-05	0.000661339	2	ANKRD44	196967017	197311173	ankyrin repeat domain 44 [Source:HGNC Symbol;Acc:HGNC:25259]	no	no	no	no
ENSG00000065427	4616.64	-0.146519	0.163006	-0.898854	0.368731	0.598863	16	KARS1	75627474	75648643	lysyl-tRNA synthetase 1 [Source:HGNC Symbol;Acc:HGNC:6215]	no	no	no	no
ENSG00000065457	858.847	-0.431485	0.172395	-2.50288	0.0123186	0.0559953	16	ADAT1	75596868	75623300	adenosine deaminase tRNA specific 1 [Source:HGNC Symbol;Acc:HGNC:228]	no	no	no	no
ENSG00000065485	3620.12	-0.109931	0.166779	-0.659144	0.509803	0.71411	3	PDIA5	123067025	123225227	protein disulfide isomerase family A member 5 [Source:HGNC Symbol;Acc:HGNC:24811]	no	no	no	no
ENSG00000065491	467.481	0.0239149	0.172948	0.138278	0.890021	0.946574	6	TBC1D22B	37257772	37332970	TBC1 domain family member 22B [Source:HGNC Symbol;Acc:HGNC:21602]	no	no	no	no
ENSG00000065518	2185.63	0.0834792	0.124349	0.671328	0.502012	0.708154	3	NDUFB4	120596328	120602507	NADH:ubiquinone oxidoreductase subunit B4 [Source:HGNC Symbol;Acc:HGNC:7699]	no	no	no	no
ENSG00000065526	4476.3	-0.0123151	0.128087	-0.0961464	0.923404	0.96398	1	SPEN	15836095	15940456	spen family transcriptional repressor [Source:HGNC Symbol;Acc:HGNC:17575]	no	no	no	no
ENSG00000065534	16186.1	-0.57262	0.168234	-3.40371	0.000664765	0.00522996	3	MYLK	123610049	123884332	myosin light chain kinase [Source:HGNC Symbol;Acc:HGNC:7590]	no	no	no	no
ENSG00000065548	2649.35	-0.0951409	0.157859	-0.602697	0.54671	0.740987	2	ZC3H15	186486253	186509361	zinc finger CCCH-type containing 15 [Source:HGNC Symbol;Acc:HGNC:29528]	no	no	no	no
ENSG00000065559	1502.17	0.0360117	0.155043	0.23227	0.816328	0.904361	17	MAP2K4	12020829	12143830	mitogen-activated protein kinase kinase 4 [Source:HGNC Symbol;Acc:HGNC:6844]	no	no	no	no
ENSG00000065600	231.053	0.124327	0.201971	0.615567	0.538181	0.734553	1	PACC1	212363928	212414901	proton activated chloride channel 1 [Source:HGNC Symbol;Acc:HGNC:25593]	no	no	no	no
ENSG00000065613	3931.37	-0.237958	0.144444	-1.64741	0.0994742	0.261701	10	SLK	103967140	104029233	STE20 like kinase [Source:HGNC Symbol;Acc:HGNC:11088]	no	no	no	no
ENSG00000065615	788.362	0.1913	0.131441	1.45541	0.145557	0.337085	6	CYB5R4	83859656	83967423	cytochrome b5 reductase 4 [Source:HGNC Symbol;Acc:HGNC:20147]	no	no	no	no
ENSG00000065621	91.0372	0.0646328	0.189846	0.340448	0.733519	0.860159	10	GSTO2	104268873	104304950	glutathione S-transferase omega 2 [Source:HGNC Symbol;Acc:HGNC:23064]	no	no	no	no
ENSG00000065665	526.833	-0.0908175	0.199064	-0.456223	0.64823	0.808445	10	SEC61A2	12129637	12169961	SEC61 translocon subunit alpha 2 [Source:HGNC Symbol;Acc:HGNC:17702]	no	no	no	no
ENSG00000065717	177.917	-0.50649	0.395438	-1.28083	0.200252	0.415003	19	TLE2	2997639	3047635	TLE family member 2, transcriptional corepressor [Source:HGNC Symbol;Acc:HGNC:11838]	no	no	no	no
ENSG00000065802	2278.05	-0.0574132	0.173596	-0.33073	0.740849	0.864566	2	ASB1	238426742	238452250	ankyrin repeat and SOCS box containing 1 [Source:HGNC Symbol;Acc:HGNC:16011]	no	no	no	no
ENSG00000065809	686.955	-0.0110506	0.187191	-0.059034	0.952925	0.978387	10	FAM107B	14518557	14774897	family with sequence similarity 107 member B [Source:HGNC Symbol;Acc:HGNC:23726]	no	no	no	no
ENSG00000065833	1489.94	-0.247952	0.144873	-1.71151	0.0869867	0.239582	6	ME1	83210402	83431051	malic enzyme 1 [Source:HGNC Symbol;Acc:HGNC:6983]	no	no	no	no
ENSG00000065882	2259.5	-0.220413	0.192349	-1.1459	0.251836	0.477849	4	TBC1D1	37891084	38139175	TBC1 domain family member 1 [Source:HGNC Symbol;Acc:HGNC:11578]	no	no	no	no
ENSG00000065883	2632.76	-0.0635422	0.0784985	-0.80947	0.418245	0.643116	7	CDK13	39950121	40099580	cyclin dependent kinase 13 [Source:HGNC Symbol;Acc:HGNC:1733]	no	no	no	no
ENSG00000065911	5286.67	0.311224	0.285946	1.0884	0.276419	0.505897	2	MTHFD2	74186172	74217565	methylenetetrahydrofolate dehydrogenase (NADP+ dependent) 2, methenyltetrahydrofolate cyclohydrolase [Source:HGNC Symbol;Acc:HGNC:7434]	no	no	no	no
ENSG00000065923	1906.03	0.183662	0.218293	0.841353	0.40015	0.626409	X	SLC9A7	46599251	46759118	solute carrier family 9 member A7 [Source:HGNC Symbol;Acc:HGNC:17123]	no	no	no	yes
ENSG00000065970	2382.02	0.00766266	0.141864	0.0540141	0.956924	0.980144	12	FOXJ2	8032716	8055517	forkhead box J2 [Source:HGNC Symbol;Acc:HGNC:24818]	no	no	no	no
ENSG00000065978	27474.1	-0.0635994	0.138436	-0.459412	0.645938	0.807193	1	YBX1	42682418	42703805	Y-box binding protein 1 [Source:HGNC Symbol;Acc:HGNC:8014]	no	no	no	no
ENSG00000065989	1534.41	-0.450858	0.112631	-4.00296	6.25555e-05	0.000685404	19	PDE4A	10416773	10469630	phosphodiesterase 4A [Source:HGNC Symbol;Acc:HGNC:8780]	no	no	no	no
ENSG00000066027	1412.88	-0.110336	0.151986	-0.725961	0.467863	0.681535	1	PPP2R5A	212285410	212361853	protein phosphatase 2 regulatory subunit B'alpha [Source:HGNC Symbol;Acc:HGNC:9309]	no	no	no	no
ENSG00000066044	3676.68	-0.0833047	0.164921	-0.505119	0.613475	0.785605	19	ELAVL1	7958573	8005659	ELAV like RNA binding protein 1 [Source:HGNC Symbol;Acc:HGNC:3312]	no	no	no	no
ENSG00000066084	1947.45	-0.40157	0.168685	-2.38059	0.0172851	0.0724505	12	DIP2B	50504985	50748657	disco interacting protein 2 homolog B [Source:HGNC Symbol;Acc:HGNC:29284]	no	no	no	no
ENSG00000066117	2740.44	0.0642644	0.129681	0.495557	0.620207	0.789496	12	SMARCD1	50085200	50100707	SWI/SNF related, matrix associated, actin dependent regulator of chromatin, subfamily d, member 1 [Source:HGNC Symbol;Acc:HGNC:11106]	no	no	no	no
ENSG00000066135	963.424	-0.138285	0.161936	-0.853949	0.393133	0.620811	1	KDM4A	43650149	43705518	lysine demethylase 4A [Source:HGNC Symbol;Acc:HGNC:22978]	no	no	no	no
ENSG00000066136	1064.12	0.027431	0.134428	0.204057	0.838309	0.917369	1	NFYC	40691648	40771603	nuclear transcription factor Y subunit gamma [Source:HGNC Symbol;Acc:HGNC:7806]	no	no	no	no
ENSG00000066279	2731.24	-0.148333	0.246166	-0.602572	0.546793	0.741024	1	ASPM	197084121	197146694	assembly factor for spindle microtubules [Source:HGNC Symbol;Acc:HGNC:19048]	no	no	no	no
ENSG00000066322	4779.5	-0.186556	0.0807832	-2.30934	0.0209247	0.083686	1	ELOVL1	43363398	43368074	ELOVL fatty acid elongase 1 [Source:HGNC Symbol;Acc:HGNC:14418]	no	no	no	no
ENSG00000066379	194.667	0.0738952	0.139453	0.529891	0.596187	0.774088	6	POLR1H	30058899	30064909	RNA polymerase I subunit H [Source:HGNC Symbol;Acc:HGNC:13182]	no	no	no	no
ENSG00000066405	45.6738	0.128427	0.439079	0.292492	0.769911	0.879909	3	CLDN18	137998735	138033655	claudin 18 [Source:HGNC Symbol;Acc:HGNC:2039]	no	no	no	no
ENSG00000066422	1261.94	-0.0539569	0.125311	-0.430585	0.66677	0.819088	3	ZBTB11	101648889	101677135	zinc finger and BTB domain containing 11 [Source:HGNC Symbol;Acc:HGNC:16740]	no	no	no	no
ENSG00000066427	1085.28	0.128792	0.167865	0.767236	0.442941	0.662759	14	ATXN3	92044496	92106621	ataxin 3 [Source:HGNC Symbol;Acc:HGNC:7106]	no	no	no	no
ENSG00000066455	3483.3	0.103224	0.0949768	1.08683	0.277111	0.506903	14	GOLGA5	92794305	92839947	golgin A5 [Source:HGNC Symbol;Acc:HGNC:4428]	no	no	no	no
ENSG00000066468	330.526	-0.421002	0.293907	-1.43243	0.15202	0.347045	10	FGFR2	121478332	121598458	fibroblast growth factor receptor 2 [Source:HGNC Symbol;Acc:HGNC:3689]	no	no	no	no
ENSG00000066557	1147.09	-0.152336	0.174728	-0.871847	0.383292	0.612004	1	LRRC40	70144805	70205579	leucine rich repeat containing 40 [Source:HGNC Symbol;Acc:HGNC:26004]	no	no	no	no
ENSG00000066583	215.776	-0.354766	0.132617	-2.67512	0.00747027	0.0380145	5	ISOC1	129094749	129114028	isochorismatase domain containing 1 [Source:HGNC Symbol;Acc:HGNC:24254]	no	no	no	no
ENSG00000066629	2168.56	0.705498	0.197174	3.57805	0.000346165	0.0030172	14	EML1	99737693	99942060	EMAP like 1 [Source:HGNC Symbol;Acc:HGNC:3330]	no	no	no	no
ENSG00000066651	448.673	-0.0550794	0.167387	-0.329053	0.742115	0.865079	6	TRMT11	125986479	126203817	tRNA methyltransferase 11 homolog [Source:HGNC Symbol;Acc:HGNC:21080]	no	no	no	no
ENSG00000066654	1840.2	0.0939492	0.141493	0.663985	0.5067	0.711357	16	THUMPD1	20702816	20742084	THUMP domain containing 1 [Source:HGNC Symbol;Acc:HGNC:23807]	no	no	no	no
ENSG00000066697	2033.46	0.237061	0.159461	1.48664	0.13711	0.323378	9	MSANTD3	100427143	100451734	Myb/SANT DNA binding domain containing 3 [Source:HGNC Symbol;Acc:HGNC:23370]	no	no	no	no
ENSG00000066735	25.5955	5.34177	1.90881	2.79849	0.00513427	0.028011	14	KIF26A	104136454	104180894	kinesin family member 26A [Source:HGNC Symbol;Acc:HGNC:20226]	no	no	no	no
ENSG00000066739	2451.99	-0.103848	0.136968	-0.758191	0.448337	0.667714	14	ATG2B	96279195	96363341	autophagy related 2B [Source:HGNC Symbol;Acc:HGNC:20187]	no	no	no	no
ENSG00000066777	3027.54	-0.350902	0.0700976	-5.0059	5.56004e-07	1.03426e-05	8	ARFGEF1	67173511	67343781	ADP ribosylation factor guanine nucleotide exchange factor 1 [Source:HGNC Symbol;Acc:HGNC:15772]	no	no	no	no
ENSG00000066827	344.257	0.0293813	0.0757054	0.3881	0.697942	0.838495	8	ZFAT	134477788	134713049	zinc finger and AT-hook domain containing [Source:HGNC Symbol;Acc:HGNC:19899]	no	no	no	no
ENSG00000066855	879.402	-0.251771	0.179016	-1.40642	0.1596	0.357004	8	MTFR1	65644734	65771261	mitochondrial fission regulator 1 [Source:HGNC Symbol;Acc:HGNC:29510]	no	no	no	no
ENSG00000066923	104.918	0.14224	0.232545	0.611668	0.540758	0.736329	7	STAG3	100177563	100221488	stromal antigen 3 [Source:HGNC Symbol;Acc:HGNC:11356]	no	no	no	no
ENSG00000066926	1373.28	-0.329301	0.17592	-1.87188	0.0612231	0.186862	18	FECH	57544377	57586732	ferrochelatase [Source:HGNC Symbol;Acc:HGNC:3647]	no	no	no	no
ENSG00000066933	2697.22	-0.227244	0.12679	-1.79229	0.0730871	0.211597	15	MYO9A	71822291	72118577	myosin IXA [Source:HGNC Symbol;Acc:HGNC:7608]	no	no	no	no
ENSG00000067048	6154.74	1.21141	0.152801	7.92805	2.22607e-15	1.66576e-13	Y	DDX3Y	12904108	12920478	DEAD-box helicase 3 Y-linked [Source:HGNC Symbol;Acc:HGNC:2699]	no	no	no	no
ENSG00000067057	9791.99	0.28985	0.20567	1.4093	0.158748	0.355926	10	PFKP	3066333	3137718	phosphofructokinase, platelet [Source:HGNC Symbol;Acc:HGNC:8878]	no	no	no	no
ENSG00000067064	1709.41	-0.0299859	0.162785	-0.184206	0.853852	0.926143	10	IDI1	1039152	1049119	isopentenyl-diphosphate delta isomerase 1 [Source:HGNC Symbol;Acc:HGNC:5387]	no	no	no	no
ENSG00000067066	3716.43	0.355824	0.125403	2.83745	0.00454756	0.0254125	2	SP100	230415942	230545606	SP100 nuclear antigen [Source:HGNC Symbol;Acc:HGNC:11206]	no	no	no	no
ENSG00000067082	11878.9	0.00359509	0.108978	0.0329892	0.973683	0.987986	10	KLF6	3775996	3785281	KLF transcription factor 6 [Source:HGNC Symbol;Acc:HGNC:2235]	no	no	no	no
ENSG00000067113	2255.21	-0.778664	0.233341	-3.33702	0.000846817	0.00636563	5	PLPP1	55424854	55534969	phospholipid phosphatase 1 [Source:HGNC Symbol;Acc:HGNC:9228]	no	no	no	no
ENSG00000067141	4550.05	-1.47274	0.226899	-6.49069	8.54421e-11	3.40992e-09	15	NEO1	73051710	73305205	neogenin 1 [Source:HGNC Symbol;Acc:HGNC:7754]	no	no	no	no
ENSG00000067167	12837.2	-0.533638	0.200436	-2.66238	0.00775892	0.0391214	8	TRAM1	70573218	70608416	translocation associated membrane protein 1 [Source:HGNC Symbol;Acc:HGNC:20568]	no	no	no	no
ENSG00000067177	427.686	1.37633	0.230159	5.97992	2.23246e-09	6.74345e-08	X	PHKA1	72578814	72714319	phosphorylase kinase regulatory subunit alpha 1 [Source:HGNC Symbol;Acc:HGNC:8925]	no	no	no	yes
ENSG00000067182	6944.6	0.0940287	0.14	0.671632	0.501818	0.708154	12	TNFRSF1A	6328757	6342114	TNF receptor superfamily member 1A [Source:HGNC Symbol;Acc:HGNC:11916]	no	no	no	no
ENSG00000067191	693.685	-0.14901	0.204186	-0.729776	0.465527	0.680131	17	CACNB1	39173453	39197702	calcium voltage-gated channel auxiliary subunit beta 1 [Source:HGNC Symbol;Acc:HGNC:1401]	no	no	no	no
ENSG00000067208	1225.72	0.208689	0.154871	1.3475	0.177818	0.383726	1	EVI5	92508696	92792404	ecotropic viral integration site 5 [Source:HGNC Symbol;Acc:HGNC:3501]	no	no	no	no
ENSG00000067221	859.209	-0.477952	0.146617	-3.25987	0.00111464	0.00802175	15	STOML1	73978926	73994622	stomatin like 1 [Source:HGNC Symbol;Acc:HGNC:14560]	no	no	no	no
ENSG00000067225	116147	0.131433	0.129829	1.01235	0.311369	0.543288	15	PKM	72199029	72231819	pyruvate kinase M1/2 [Source:HGNC Symbol;Acc:HGNC:9021]	no	no	no	no
ENSG00000067248	2611.49	-0.379477	0.169375	-2.24045	0.0250614	0.0957248	5	DHX29	55256055	55307694	DExH-box helicase 29 [Source:HGNC Symbol;Acc:HGNC:15815]	no	no	no	no
ENSG00000067334	2118.48	-0.202905	0.155314	-1.30642	0.191409	0.402302	1	DNTTIP2	93866284	93879918	deoxynucleotidyltransferase terminal interacting protein 2 [Source:HGNC Symbol;Acc:HGNC:24013]	no	no	no	no
ENSG00000067365	885.161	0.294247	0.199466	1.47518	0.140165	0.328291	16	METTL22	8621683	8649654	methyltransferase 22, Kin17 lysine [Source:HGNC Symbol;Acc:HGNC:28368]	no	no	no	no
ENSG00000067369	3515.61	0.139931	0.0903674	1.54847	0.121509	0.297337	15	TP53BP1	43403061	43510728	tumor protein p53 binding protein 1 [Source:HGNC Symbol;Acc:HGNC:11999]	no	no	no	no
ENSG00000067445	1419.97	1.05173	0.169449	6.20678	5.40825e-10	1.85004e-08	X	TRO	54920462	54931431	trophinin [Source:HGNC Symbol;Acc:HGNC:12326]	no	no	no	yes
ENSG00000067533	791.557	-0.26026	0.139643	-1.86376	0.0623558	0.189441	1	RRP15	218285293	218337983	ribosomal RNA processing 15 homolog [Source:HGNC Symbol;Acc:HGNC:24255]	no	no	no	no
ENSG00000067560	39561.1	-0.0563477	0.124854	-0.45131	0.651766	0.810482	3	RHOA	49359139	49412998	ras homolog family member A [Source:HGNC Symbol;Acc:HGNC:667]	no	no	no	no
ENSG00000067596	2429.43	-0.141271	0.160651	-0.879367	0.379203	0.608486	17	DHX8	43483865	43610338	DEAH-box helicase 8 [Source:HGNC Symbol;Acc:HGNC:2749]	no	no	no	no
ENSG00000067601	80.2461	0.152576	0.202275	0.7543	0.450669	0.669518	7	PMS2P4	67295608	67299424	PMS1 homolog 2, mismatch repair system component pseudogene 4 [Source:HGNC Symbol;Acc:HGNC:9129]	no	no	no	no
ENSG00000067646	1499.47	0.848223	0.14492	5.85306	4.82624e-09	1.36692e-07	Y	ZFY	2935281	2982506	zinc finger protein Y-linked [Source:HGNC Symbol;Acc:HGNC:12870]	no	no	no	no
ENSG00000067704	4528.91	-0.315459	0.183208	-1.72186	0.0850944	0.235857	1	IARS2	220094132	220148041	isoleucyl-tRNA synthetase 2, mitochondrial [Source:HGNC Symbol;Acc:HGNC:29685]	no	no	no	no
ENSG00000067715	54.0179	-2.71625	0.560181	-4.84888	1.24162e-06	2.12918e-05	12	SYT1	78863993	79452008	synaptotagmin 1 [Source:HGNC Symbol;Acc:HGNC:11509]	no	no	no	no
ENSG00000067798	2161.46	-1.45592	0.165153	-8.81557	1.19078e-18	1.45804e-16	12	NAV3	77324641	78213010	neuron navigator 3 [Source:HGNC Symbol;Acc:HGNC:15998]	no	no	no	no
ENSG00000067829	2094.58	-0.0405693	0.102952	-0.394061	0.693536	0.835593	X	IDH3G	153785766	153794512	isocitrate dehydrogenase (NAD(+)) 3 non-catalytic subunit gamma [Source:HGNC Symbol;Acc:HGNC:5386]	no	no	no	yes
ENSG00000067836	293.467	-0.0416177	0.20719	-0.200867	0.840803	0.918346	16	ROGDI	4796968	4802880	rogdi atypical leucine zipper [Source:HGNC Symbol;Acc:HGNC:29478]	no	no	no	no
ENSG00000067900	7306.64	-0.42908	0.141712	-3.02784	0.00246308	0.0155114	18	ROCK1	20946906	21111813	Rho associated coiled-coil containing protein kinase 1 [Source:HGNC Symbol;Acc:HGNC:10251]	no	no	no	no
ENSG00000067955	2977.61	-0.603224	0.173099	-3.48486	0.000492397	0.00406575	16	CBFB	67028984	67101058	core-binding factor subunit beta [Source:HGNC Symbol;Acc:HGNC:1539]	no	no	no	no
ENSG00000067992	253.958	0.896863	0.165285	5.42615	5.7582e-08	1.29085e-06	X	PDK3	24465244	24550466	pyruvate dehydrogenase kinase 3 [Source:HGNC Symbol;Acc:HGNC:8811]	no	no	no	yes
ENSG00000068001	847.538	-0.352675	0.217225	-1.62355	0.104473	0.270421	3	HYAL2	50317790	50322782	hyaluronidase 2 [Source:HGNC Symbol;Acc:HGNC:5321]	no	no	no	no
ENSG00000068024	735.648	-0.215041	0.174354	-1.23336	0.217442	0.437008	2	HDAC4	239048168	239401654	histone deacetylase 4 [Source:HGNC Symbol;Acc:HGNC:14063]	no	no	no	no
ENSG00000068028	1844.41	-0.155794	0.125965	-1.2368	0.216161	0.435164	3	RASSF1	50329782	50340980	Ras association domain family member 1 [Source:HGNC Symbol;Acc:HGNC:9882]	no	no	no	no
ENSG00000068078	141.035	-0.941322	0.298523	-3.15327	0.00161454	0.010938	4	FGFR3	1793293	1808872	fibroblast growth factor receptor 3 [Source:HGNC Symbol;Acc:HGNC:3690]	no	no	no	no
ENSG00000068079	718.145	0.366633	0.200988	1.82416	0.0681284	0.201584	17	IFI35	43006740	43014456	interferon induced protein 35 [Source:HGNC Symbol;Acc:HGNC:5399]	no	no	no	no
ENSG00000068097	1229.74	0.0346173	0.125965	0.274817	0.783457	0.886513	17	HEATR6	60041008	60078922	HEAT repeat containing 6 [Source:HGNC Symbol;Acc:HGNC:24076]	no	no	no	no
ENSG00000068120	2162.24	0.027328	0.109112	0.250458	0.802234	0.896286	17	COASY	42561467	42566277	Coenzyme A synthase [Source:HGNC Symbol;Acc:HGNC:29932]	no	no	no	no
ENSG00000068137	1006.37	-0.311709	0.163584	-1.90549	0.056716	0.176912	17	PLEKHH3	42667914	42676994	pleckstrin homology, MyTH4 and FERM domain containing H3 [Source:HGNC Symbol;Acc:HGNC:26105]	no	no	no	no
ENSG00000068305	3059.18	-0.400861	0.0692345	-5.7899	7.04291e-09	1.92838e-07	15	MEF2A	99565417	99716488	myocyte enhancer factor 2A [Source:HGNC Symbol;Acc:HGNC:6993]	no	no	no	no
ENSG00000068308	2843.51	0.0834805	0.154963	0.538711	0.590086	0.770288	X	OTUD5	48922024	48958386	OTU deubiquitinase 5 [Source:HGNC Symbol;Acc:HGNC:25402]	no	no	no	yes
ENSG00000068323	5884.27	-0.204769	0.104152	-1.96605	0.0492928	0.159545	X	TFE3	49028726	49043410	transcription factor binding to IGHM enhancer 3 [Source:HGNC Symbol;Acc:HGNC:11752]	no	no	no	yes
ENSG00000068354	800.031	-0.116439	0.146358	-0.795577	0.426278	0.649788	X	TBC1D25	48539714	48562609	TBC1 domain family member 25 [Source:HGNC Symbol;Acc:HGNC:8092]	no	no	no	yes
ENSG00000068366	4760.21	-0.085039	0.142903	-0.595082	0.551789	0.744577	X	ACSL4	109624244	109733403	acyl-CoA synthetase long chain family member 4 [Source:HGNC Symbol;Acc:HGNC:3571]	no	no	no	yes
ENSG00000068383	1150.43	0.15097	0.136287	1.10773	0.267978	0.495893	10	INPP5A	132537787	132783480	inositol polyphosphate-5-phosphatase A [Source:HGNC Symbol;Acc:HGNC:6076]	no	no	no	no
ENSG00000068394	905.954	-0.0112605	0.091096	-0.123611	0.901623	0.953165	X	GPKOW	49113407	49123735	G-patch domain and KOW motifs [Source:HGNC Symbol;Acc:HGNC:30677]	no	no	no	yes
ENSG00000068400	1698.93	0.163744	0.139729	1.17186	0.241252	0.465891	X	GRIPAP1	48973720	49002265	GRIP1 associated protein 1 [Source:HGNC Symbol;Acc:HGNC:18706]	no	no	no	yes
ENSG00000068438	2716.17	-0.178361	0.167089	-1.06746	0.285763	0.516327	X	FTSJ1	48476021	48486364	FtsJ RNA 2'-O-methyltransferase 1 [Source:HGNC Symbol;Acc:HGNC:13254]	no	no	no	yes
ENSG00000068489	1764.3	0.903682	0.235459	3.83795	0.000124063	0.00123969	17	PRR11	59155732	59206709	proline rich 11 [Source:HGNC Symbol;Acc:HGNC:25619]	no	no	no	no
ENSG00000068650	939.197	-0.433924	0.152923	-2.83754	0.00454628	0.0254125	13	ATP11A	112690038	112887168	ATPase phospholipid transporting 11A [Source:HGNC Symbol;Acc:HGNC:13552]	no	no	no	no
ENSG00000068654	2810.03	-0.340608	0.138008	-2.46803	0.0135857	0.0601224	2	POLR1A	86020216	86106155	RNA polymerase I subunit A [Source:HGNC Symbol;Acc:HGNC:17264]	no	no	no	no
ENSG00000068697	12201.8	-0.290576	0.117313	-2.47692	0.0132521	0.0590226	2	LAPTM4A	20032650	20051628	lysosomal protein transmembrane 4 alpha [Source:HGNC Symbol;Acc:HGNC:6924]	no	no	no	no
ENSG00000068724	2726.63	-0.510177	0.197614	-2.58168	0.00983199	0.0470008	2	TTC7A	46915869	47076137	tetratricopeptide repeat domain 7A [Source:HGNC Symbol;Acc:HGNC:19750]	no	no	no	no
ENSG00000068745	1945.48	0.0403872	0.0955262	0.422787	0.672451	0.822522	3	IP6K2	48688003	48740353	inositol hexakisphosphate kinase 2 [Source:HGNC Symbol;Acc:HGNC:17313]	no	no	no	no
ENSG00000068784	805.214	-0.0338041	0.174223	-0.194028	0.846154	0.921985	2	SRBD1	45388680	45612165	S1 RNA binding domain 1 [Source:HGNC Symbol;Acc:HGNC:25521]	no	no	no	no
ENSG00000068796	1877.67	-0.0753863	0.18574	-0.40587	0.684838	0.830427	5	KIF2A	62306162	62391025	kinesin family member 2A [Source:HGNC Symbol;Acc:HGNC:6318]	no	no	no	no
ENSG00000068878	4272.42	-0.00577786	0.15796	-0.0365781	0.970821	0.986628	2	PSME4	53864069	53970993	proteasome activator subunit 4 [Source:HGNC Symbol;Acc:HGNC:20635]	no	no	no	no
ENSG00000068885	892.242	0.138416	0.195358	0.708527	0.478618	0.690509	3	IFT80	160256986	160399880	intraflagellar transport 80 [Source:HGNC Symbol;Acc:HGNC:29262]	no	no	no	no
ENSG00000068903	2040.74	-0.264342	0.123931	-2.13298	0.0329266	0.118644	19	SIRT2	38878555	38899862	sirtuin 2 [Source:HGNC Symbol;Acc:HGNC:10886]	no	no	no	no
ENSG00000068912	4205.53	0.0480808	0.0830867	0.578682	0.562804	0.75189	2	ERLEC1	53787009	53833038	endoplasmic reticulum lectin 1 [Source:HGNC Symbol;Acc:HGNC:25222]	no	no	no	no
ENSG00000068971	1540.62	0.335594	0.192779	1.74082	0.0817145	0.229782	11	PPP2R5B	64917553	64934475	protein phosphatase 2 regulatory subunit B'beta [Source:HGNC Symbol;Acc:HGNC:9310]	no	no	no	no
ENSG00000069011	98.1412	4.69687	0.800552	5.86704	4.4364e-09	1.27439e-07	5	PITX1	135027734	135034813	paired like homeodomain 1 [Source:HGNC Symbol;Acc:HGNC:9004]	no	no	no	no
ENSG00000069020	604.341	-0.253212	0.12241	-2.06856	0.0385877	0.133596	5	MAST4	66596380	67169593	microtubule associated serine/threonine kinase family member 4 [Source:HGNC Symbol;Acc:HGNC:19037]	no	no	no	no
ENSG00000069122	27.2889	-4.28678	1.11916	-3.83035	0.00012796	0.00127283	6	ADGRF5	46852522	46954943	adhesion G protein-coupled receptor F5 [Source:HGNC Symbol;Acc:HGNC:19030]	no	no	no	no
ENSG00000069248	2113.22	-0.107107	0.166964	-0.641498	0.521199	0.722489	1	NUP133	229440259	229508341	nucleoporin 133 [Source:HGNC Symbol;Acc:HGNC:18016]	no	no	no	no
ENSG00000069275	16457.7	0.00520957	0.163319	0.0318981	0.974553	0.98806	1	NUCKS1	205712822	205750182	nuclear casein kinase and cyclin dependent kinase substrate 1 [Source:HGNC Symbol;Acc:HGNC:29923]	no	no	no	no
ENSG00000069329	6186.08	-0.191332	0.126753	-1.50948	0.131175	0.313137	16	VPS35	46656132	46689518	VPS35 retromer complex component [Source:HGNC Symbol;Acc:HGNC:13487]	no	no	no	no
ENSG00000069345	2807.99	-0.0692791	0.12282	-0.564068	0.572708	0.759634	16	DNAJA2	46955362	46973674	DnaJ heat shock protein family (Hsp40) member A2 [Source:HGNC Symbol;Acc:HGNC:14884]	no	no	no	no
ENSG00000069399	826.499	0.72988	0.189586	3.84987	0.000118179	0.00118901	19	BCL3	44747705	44760044	BCL3 transcription coactivator [Source:HGNC Symbol;Acc:HGNC:998]	no	no	no	no
ENSG00000069424	331.527	-0.162523	0.163577	-0.993558	0.320438	0.55332	1	KCNAB2	5990927	6101193	potassium voltage-gated channel subfamily A regulatory beta subunit 2 [Source:HGNC Symbol;Acc:HGNC:6229]	no	no	no	no
ENSG00000069431	393.967	-1.38908	0.270166	-5.14158	2.72439e-07	5.4364e-06	12	ABCC9	21797389	21942543	ATP binding cassette subfamily C member 9 [Source:HGNC Symbol;Acc:HGNC:60]	no	no	no	no
ENSG00000069482	37.1516	4.03533	0.599047	6.73625	1.62527e-11	7.3304e-10	11	GAL	68683779	68691175	galanin and GMAP prepropeptide [Source:HGNC Symbol;Acc:HGNC:4114]	no	no	no	no
ENSG00000069493	181.018	0.153026	0.208027	0.735605	0.461971	0.678128	12	CLEC2D	9664969	9699553	C-type lectin domain family 2 member D [Source:HGNC Symbol;Acc:HGNC:14351]	no	no	no	no
ENSG00000069509	340.345	-0.0250961	0.14384	-0.174472	0.861494	0.929762	X	FUNDC1	44523639	44542859	FUN14 domain containing 1 [Source:HGNC Symbol;Acc:HGNC:28746]	no	yes	no	no
ENSG00000069667	878.251	0.527676	0.133461	3.95378	7.69258e-05	0.000819008	15	RORA	60488284	61229302	RAR related orphan receptor A [Source:HGNC Symbol;Acc:HGNC:10258]	no	no	no	no
ENSG00000069702	1891.4	-0.167258	0.249286	-0.67095	0.502253	0.708154	1	TGFBR3	91680343	91906335	transforming growth factor beta receptor 3 [Source:HGNC Symbol;Acc:HGNC:11774]	no	no	no	no
ENSG00000069849	5633.77	-0.371812	0.119938	-3.10005	0.0019349	0.0127605	3	ATP1B3	141876124	141926549	ATPase Na+/K+ transporting subunit beta 3 [Source:HGNC Symbol;Acc:HGNC:806]	no	no	no	no
ENSG00000069869	3355.08	-0.0392128	0.148393	-0.264249	0.791588	0.890226	15	NEDD4	55826922	55993660	NEDD4 E3 ubiquitin protein ligase [Source:HGNC Symbol;Acc:HGNC:7727]	no	no	no	no
ENSG00000069943	380.701	-0.40242	0.0649014	-6.20048	5.62895e-10	1.91339e-08	15	PIGB	55318960	55355648	phosphatidylinositol glycan anchor biosynthesis class B [Source:HGNC Symbol;Acc:HGNC:8959]	no	no	no	no
ENSG00000069956	4489.98	0.0416323	0.186527	0.223197	0.823382	0.908051	15	MAPK6	51952106	52067375	mitogen-activated protein kinase 6 [Source:HGNC Symbol;Acc:HGNC:6879]	no	no	no	no
ENSG00000069966	1002.77	-0.25014	0.139707	-1.79046	0.0733804	0.212353	15	GNB5	52115100	52191392	G protein subunit beta 5 [Source:HGNC Symbol;Acc:HGNC:4401]	no	no	no	no
ENSG00000069974	891.351	0.147458	0.131078	1.12496	0.260605	0.487606	15	RAB27A	55202966	55319113	RAB27A, member RAS oncogene family [Source:HGNC Symbol;Acc:HGNC:9766]	no	no	no	no
ENSG00000069998	1220.4	0.462268	0.106642	4.33476	1.45919e-05	0.000188038	22	HDHD5	17137511	17165287	haloacid dehalogenase like hydrolase domain containing 5 [Source:HGNC Symbol;Acc:HGNC:1843]	no	no	no	no
ENSG00000070010	1597.65	0.0289163	0.15436	0.18733	0.851402	0.924704	22	UFD1	19449911	19479202	ubiquitin recognition factor in ER associated degradation 1 [Source:HGNC Symbol;Acc:HGNC:12520]	no	no	no	no
ENSG00000070018	1928.64	-0.353834	0.177774	-1.99036	0.0465512	0.153369	12	LRP6	12116025	12267044	LDL receptor related protein 6 [Source:HGNC Symbol;Acc:HGNC:6698]	no	no	no	no
ENSG00000070047	2291.39	0.0308844	0.16552	0.186591	0.851982	0.924948	11	PHRF1	576470	612222	PHD and ring finger domains 1 [Source:HGNC Symbol;Acc:HGNC:24351]	no	no	no	no
ENSG00000070061	2431.64	0.0260503	0.125404	0.207731	0.835439	0.915445	9	ELP1	108866898	108934328	elongator acetyltransferase complex subunit 1 [Source:HGNC Symbol;Acc:HGNC:5959]	no	no	no	no
ENSG00000070081	5462.35	0.118109	0.128184	0.921405	0.356839	0.588034	11	NUCB2	17208153	17349980	nucleobindin 2 [Source:HGNC Symbol;Acc:HGNC:8044]	no	no	no	no
ENSG00000070087	8583.23	-0.159336	0.127861	-1.24617	0.212702	0.430842	3	PFN2	149964904	150050788	profilin 2 [Source:HGNC Symbol;Acc:HGNC:8882]	no	no	no	no
ENSG00000070193	16.126	7.06021	2.84517	2.48147	0.0130842	0.0583736	5	FGF10	44300247	44389706	fibroblast growth factor 10 [Source:HGNC Symbol;Acc:HGNC:3666]	no	no	no	no
ENSG00000070214	6231.34	-0.352244	0.221802	-1.5881	0.112264	0.282698	9	SLC44A1	105244622	105439171	solute carrier family 44 member 1 [Source:HGNC Symbol;Acc:HGNC:18798]	no	no	no	no
ENSG00000070269	749.527	-0.255177	0.155267	-1.64347	0.100286	0.263026	14	TMEM260	56488354	56650606	transmembrane protein 260 [Source:HGNC Symbol;Acc:HGNC:20185]	no	no	no	no
ENSG00000070366	1823.73	0.0678904	0.0907369	0.748211	0.454333	0.671933	17	SMG6	2059839	2303785	SMG6 nonsense mediated mRNA decay factor [Source:HGNC Symbol;Acc:HGNC:17809]	no	no	no	no
ENSG00000070367	4386.87	-0.290461	0.147083	-1.97481	0.0482901	0.157188	14	EXOC5	57200507	57268905	exocyst complex component 5 [Source:HGNC Symbol;Acc:HGNC:10696]	no	no	no	no
ENSG00000070371	747.065	0.225474	0.21247	1.06121	0.288596	0.519024	22	CLTCL1	19179473	19291719	clathrin heavy chain like 1 [Source:HGNC Symbol;Acc:HGNC:2093]	no	no	no	no
ENSG00000070404	3126.31	-0.384854	0.256747	-1.49896	0.133885	0.317934	19	FSTL3	676392	683392	follistatin like 3 [Source:HGNC Symbol;Acc:HGNC:3973]	no	no	no	no
ENSG00000070413	3231.27	-0.21211	0.134058	-1.58222	0.113599	0.284743	22	DGCR2	19036282	19122454	DiGeorge syndrome critical region gene 2 [Source:HGNC Symbol;Acc:HGNC:2845]	no	no	no	no
ENSG00000070423	1188.49	-0.22517	0.158888	-1.41716	0.156435	0.352904	19	RNF126	647526	663233	ring finger protein 126 [Source:HGNC Symbol;Acc:HGNC:21151]	no	no	no	no
ENSG00000070444	1508.12	0.239973	0.219639	1.09258	0.274579	0.503791	17	MNT	2384073	2401104	MAX network transcriptional repressor [Source:HGNC Symbol;Acc:HGNC:7188]	no	no	no	no
ENSG00000070476	981.595	0.135342	0.1467	0.922579	0.356227	0.587393	3	ZXDC	126437601	126475891	ZXD family zinc finger C [Source:HGNC Symbol;Acc:HGNC:28160]	no	no	no	no
ENSG00000070495	1576.68	0.170115	0.171464	0.992132	0.321133	0.553794	17	JMJD6	76712832	76726799	jumonji domain containing 6, arginine demethylase and lysine hydroxylase [Source:HGNC Symbol;Acc:HGNC:19355]	no	no	no	no
ENSG00000070501	321.654	0.185422	0.21476	0.863393	0.387921	0.615755	8	POLB	42338454	42371808	DNA polymerase beta [Source:HGNC Symbol;Acc:HGNC:9174]	no	no	no	no
ENSG00000070540	2334.93	-0.0897461	0.129769	-0.691586	0.489197	0.698545	17	WIPI1	68420948	68457513	WD repeat domain, phosphoinositide interacting 1 [Source:HGNC Symbol;Acc:HGNC:25471]	no	no	no	no
ENSG00000070610	2295.35	0.127429	0.144554	0.881533	0.37803	0.607449	9	GBA2	35736866	35749228	glucosylceramidase beta 2 [Source:HGNC Symbol;Acc:HGNC:18986]	no	no	no	no
ENSG00000070614	18010.9	-0.667873	0.212214	-3.14716	0.00164865	0.0111348	5	NDST1	150485818	150558211	N-deacetylase and N-sulfotransferase 1 [Source:HGNC Symbol;Acc:HGNC:7680]	no	no	no	no
ENSG00000070669	141.253	0.832438	0.383778	2.16906	0.0300779	0.110557	7	ASNS	97851677	97872542	asparagine synthetase (glutamine-hydrolyzing) [Source:HGNC Symbol;Acc:HGNC:753]	no	no	no	no
ENSG00000070718	1149.24	0.25482	0.181985	1.40023	0.161445	0.359222	8	AP3M2	42152946	42171673	adaptor related protein complex 3 subunit mu 2 [Source:HGNC Symbol;Acc:HGNC:570]	no	no	no	no
ENSG00000070756	40158.1	0.088563	0.147697	0.599628	0.548754	0.742554	8	PABPC1	100685816	100722809	poly(A) binding protein cytoplasmic 1 [Source:HGNC Symbol;Acc:HGNC:8554]	no	no	no	no
ENSG00000070759	79.5347	-0.18112	0.185025	-0.978894	0.327632	0.560015	1	TESK2	45343883	45491163	testis associated actin remodelling kinase 2 [Source:HGNC Symbol;Acc:HGNC:11732]	no	no	no	no
ENSG00000070761	758.191	-0.0856201	0.167557	-0.510992	0.609357	0.782431	16	CFAP20	58113592	58129381	cilia and flagella associated protein 20 [Source:HGNC Symbol;Acc:HGNC:29523]	no	no	no	no
ENSG00000070770	1553.93	-0.0173911	0.152058	-0.114372	0.908943	0.957127	16	CSNK2A2	58157907	58198106	casein kinase 2 alpha 2 [Source:HGNC Symbol;Acc:HGNC:2459]	no	no	no	no
ENSG00000070778	2889.89	-0.257831	0.181847	-1.41784	0.156236	0.352677	14	PTPN21	88465778	88555007	protein tyrosine phosphatase non-receptor type 21 [Source:HGNC Symbol;Acc:HGNC:9651]	no	no	no	no
ENSG00000070785	977.25	-0.170004	0.177676	-0.956817	0.338659	0.569987	1	EIF2B3	44850522	44986722	eukaryotic translation initiation factor 2B subunit gamma [Source:HGNC Symbol;Acc:HGNC:3259]	no	no	no	no
ENSG00000070808	74.2835	0.658185	0.292506	2.25016	0.024439	0.094084	5	CAMK2A	150219491	150290093	calcium/calmodulin dependent protein kinase II alpha [Source:HGNC Symbol;Acc:HGNC:1460]	no	no	no	no
ENSG00000070814	2968.31	0.00888279	0.198365	0.0447801	0.964283	0.984236	5	TCOF1	150357629	150400308	treacle ribosome biogenesis factor 1 [Source:HGNC Symbol;Acc:HGNC:11654]	no	no	no	no
ENSG00000070831	12530	-0.14957	0.152327	-0.981904	0.326147	0.558107	1	CDC42	22052627	22101360	cell division cycle 42 [Source:HGNC Symbol;Acc:HGNC:1736]	no	no	no	no
ENSG00000070882	3249.66	-0.0679648	0.167179	-0.406539	0.684347	0.830371	7	OSBPL3	24796540	24981634	oxysterol binding protein like 3 [Source:HGNC Symbol;Acc:HGNC:16370]	no	no	no	no
ENSG00000070950	936.882	-0.382617	0.209152	-1.82937	0.0673439	0.200037	3	RAD18	8775402	8963773	RAD18 E3 ubiquitin protein ligase [Source:HGNC Symbol;Acc:HGNC:18278]	no	no	no	no
ENSG00000070961	4265.67	-1.60326	0.183645	-8.73024	2.54122e-18	2.9882e-16	12	ATP2B1	89588049	89709366	ATPase plasma membrane Ca2+ transporting 1 [Source:HGNC Symbol;Acc:HGNC:814]	no	no	no	no
ENSG00000071051	1266.49	-0.0952967	0.108145	-0.881192	0.378214	0.607597	2	NCK2	105744912	105894274	NCK adaptor protein 2 [Source:HGNC Symbol;Acc:HGNC:7665]	no	no	no	no
ENSG00000071054	18314.5	-0.0522906	0.170682	-0.306363	0.759329	0.874269	2	MAP4K4	101696850	101894690	mitogen-activated protein kinase kinase kinase kinase 4 [Source:HGNC Symbol;Acc:HGNC:6866]	no	no	no	no
ENSG00000071082	11750.6	-0.00595579	0.177067	-0.0336359	0.973168	0.987809	2	RPL31	101002229	101024032	ribosomal protein L31 [Source:HGNC Symbol;Acc:HGNC:10334]	no	no	no	no
ENSG00000071127	32314.9	-0.186593	0.146815	-1.27095	0.203747	0.420259	4	WDR1	10068089	10116972	WD repeat domain 1 [Source:HGNC Symbol;Acc:HGNC:12754]	no	no	no	no
ENSG00000071189	1786.41	-0.152356	0.138414	-1.10072	0.271016	0.499687	7	SNX13	17790761	17940501	sorting nexin 13 [Source:HGNC Symbol;Acc:HGNC:21335]	no	no	no	no
ENSG00000071205	1144.95	0.112986	0.0804086	1.40514	0.159979	0.357491	4	ARHGAP10	147732063	148072776	Rho GTPase activating protein 10 [Source:HGNC Symbol;Acc:HGNC:26099]	no	no	no	no
ENSG00000071242	5121.98	-0.0345232	0.23323	-0.148022	0.882325	0.942208	6	RPS6KA2	166409364	166906451	ribosomal protein S6 kinase A2 [Source:HGNC Symbol;Acc:HGNC:10431]	no	no	no	no
ENSG00000071243	487.178	-0.109231	0.168303	-0.649014	0.516329	0.718898	7	ING3	120950763	120977216	inhibitor of growth family member 3 [Source:HGNC Symbol;Acc:HGNC:14587]	no	no	no	no
ENSG00000071246	424.849	0.998729	0.234084	4.26654	1.98527e-05	0.000242767	14	VASH1	76761468	76783015	vasohibin 1 [Source:HGNC Symbol;Acc:HGNC:19964]	no	no	no	no
ENSG00000071282	2338.55	-1.31111	0.232896	-5.62962	1.80606e-08	4.51343e-07	3	LMCD1	8501807	8574668	LIM and cysteine rich domains 1 [Source:HGNC Symbol;Acc:HGNC:6633]	no	no	no	no
ENSG00000071462	1779.32	0.0221253	0.0693988	0.318814	0.749867	0.869894	7	BUD23	73683597	73698212	BUD23 rRNA methyltransferase and ribosome maturation factor [Source:HGNC Symbol;Acc:HGNC:16405]	no	no	no	no
ENSG00000071537	8418.24	-0.205059	0.10284	-1.99396	0.0461565	0.152478	14	SEL1L	81471547	81533853	SEL1L adaptor subunit of ERAD E3 ubiquitin ligase [Source:HGNC Symbol;Acc:HGNC:10717]	no	no	no	no
ENSG00000071539	1028.48	-0.214509	0.251799	-0.851908	0.394265	0.621561	5	TRIP13	892884	919357	thyroid hormone receptor interactor 13 [Source:HGNC Symbol;Acc:HGNC:12307]	no	no	no	no
ENSG00000071553	5285.31	-0.161053	0.143651	-1.12114	0.262229	0.489449	X	ATP6AP1	154428633	154436516	ATPase H+ transporting accessory protein 1 [Source:HGNC Symbol;Acc:HGNC:868]	no	no	no	yes
ENSG00000071564	3708.47	0.190084	0.116187	1.63602	0.101834	0.265725	19	TCF3	1609291	1652615	transcription factor 3 [Source:HGNC Symbol;Acc:HGNC:11633]	no	no	no	no
ENSG00000071575	2878.09	0.58858	0.222801	2.64173	0.00824833	0.0410412	2	TRIB2	12716910	12742734	tribbles pseudokinase 2 [Source:HGNC Symbol;Acc:HGNC:30809]	no	no	no	no
ENSG00000071626	5036.4	-0.00246286	0.109694	-0.0224522	0.982087	0.990419	19	DAZAP1	1407569	1435687	DAZ associated protein 1 [Source:HGNC Symbol;Acc:HGNC:2683]	no	no	no	no
ENSG00000071655	1918.24	-0.0433446	0.142386	-0.304417	0.760811	0.875022	19	MBD3	1573596	1592865	methyl-CpG binding domain protein 3 [Source:HGNC Symbol;Acc:HGNC:6918]	no	no	no	no
ENSG00000071794	1390.92	-0.394622	0.150014	-2.63056	0.00852438	0.0421736	3	HLTF	149030127	149086554	helicase like transcription factor [Source:HGNC Symbol;Acc:HGNC:11099]	no	no	no	no
ENSG00000071859	3819.5	-0.199386	0.139033	-1.43408	0.151549	0.346467	X	FAM50A	154444141	154450654	family with sequence similarity 50 member A [Source:HGNC Symbol;Acc:HGNC:18786]	no	no	no	yes
ENSG00000071889	1302.51	0.0443151	0.175377	0.252685	0.800512	0.895349	X	FAM3A	154506159	154516242	FAM3 metabolism regulating signaling molecule A [Source:HGNC Symbol;Acc:HGNC:13749]	no	no	no	yes
ENSG00000071894	3902.33	0.0120062	0.164719	0.0728892	0.941894	0.973909	8	CPSF1	144393229	144409335	cleavage and polyadenylation specific factor 1 [Source:HGNC Symbol;Acc:HGNC:2324]	no	no	no	no
ENSG00000071967	16180.4	-0.706014	0.19979	-3.53378	0.000409668	0.00350119	2	CYBRD1	171522247	171558129	cytochrome b reductase 1 [Source:HGNC Symbol;Acc:HGNC:20797]	no	no	no	no
ENSG00000071994	1578.79	-0.0340882	0.168506	-0.202297	0.839684	0.917958	6	PDCD2	170575295	170584692	programmed cell death 2 [Source:HGNC Symbol;Acc:HGNC:8762]	no	no	no	no
ENSG00000072041	130.207	-0.472835	0.819393	-0.577056	0.563902	0.752593	12	SLC6A15	84859491	84913629	solute carrier family 6 member 15 [Source:HGNC Symbol;Acc:HGNC:13621]	no	no	no	no
ENSG00000072042	2387.65	0.000597305	0.183558	0.00325404	0.997404	0.998276	14	RDH11	67676800	67695793	retinol dehydrogenase 11 [Source:HGNC Symbol;Acc:HGNC:17964]	no	no	no	no
ENSG00000072062	4168.32	-0.0382434	0.140482	-0.272229	0.785446	0.88762	19	PRKACA	14091688	14118084	protein kinase cAMP-activated catalytic subunit alpha [Source:HGNC Symbol;Acc:HGNC:9380]	no	no	no	no
ENSG00000072071	509.969	0.361457	0.219675	1.64541	0.0998844	0.262623	19	ADGRL1	14147743	14206187	adhesion G protein-coupled receptor L1 [Source:HGNC Symbol;Acc:HGNC:20973]	no	no	no	no
ENSG00000072110	49551	-0.217312	0.196547	-1.10565	0.268877	0.496928	14	ACTN1	68874128	68979440	actinin alpha 1 [Source:HGNC Symbol;Acc:HGNC:163]	no	no	no	no
ENSG00000072121	1636.79	-0.258531	0.152578	-1.69442	0.0901862	0.244746	14	ZFYVE26	67727374	67816590	zinc finger FYVE-type containing 26 [Source:HGNC Symbol;Acc:HGNC:20761]	no	no	no	no
ENSG00000072133	248.124	0.605723	0.231241	2.61944	0.00880734	0.043297	X	RPS6KA6	84058346	84206356	ribosomal protein S6 kinase A6 [Source:HGNC Symbol;Acc:HGNC:10435]	no	no	no	yes
ENSG00000072134	1288	-0.0668289	0.109786	-0.608719	0.542711	0.73841	17	EPN2	19215615	19336715	epsin 2 [Source:HGNC Symbol;Acc:HGNC:18639]	no	no	no	no
ENSG00000072135	1506.06	-0.272746	0.109093	-2.50012	0.0124151	0.0563787	2	PTPN18	130356045	130375405	protein tyrosine phosphatase non-receptor type 18 [Source:HGNC Symbol;Acc:HGNC:9649]	no	no	no	no
ENSG00000072163	2730.52	-0.244179	0.302552	-0.807065	0.419629	0.644116	2	LIMS2	127638381	127681786	LIM zinc finger domain containing 2 [Source:HGNC Symbol;Acc:HGNC:16084]	no	no	no	no
ENSG00000072195	6064.12	1.00123	0.176256	5.68054	1.34271e-08	3.46735e-07	2	SPEG	219434843	219493629	striated muscle enriched protein kinase [Source:HGNC Symbol;Acc:HGNC:16901]	no	no	no	no
ENSG00000072201	402.228	-0.603953	0.301765	-2.0014	0.0453493	0.150517	4	LNX1	53459301	53701405	ligand of numb-protein X 1 [Source:HGNC Symbol;Acc:HGNC:6657]	no	no	no	no
ENSG00000072210	1145.04	-0.238019	0.11766	-2.02294	0.0430793	0.144881	17	ALDH3A2	19648136	19685760	aldehyde dehydrogenase 3 family member A2 [Source:HGNC Symbol;Acc:HGNC:403]	no	no	no	no
ENSG00000072274	6504.34	-0.612969	0.106567	-5.75193	8.82291e-09	2.37783e-07	3	TFRC	196012511	196082153	transferrin receptor [Source:HGNC Symbol;Acc:HGNC:11763]	no	no	no	no
ENSG00000072310	2290.13	-0.229875	0.210763	-1.09068	0.275413	0.504852	17	SREBF1	17810399	17837002	sterol regulatory element binding transcription factor 1 [Source:HGNC Symbol;Acc:HGNC:11289]	no	no	no	no
ENSG00000072364	9101.61	-0.0464062	0.130119	-0.356643	0.721359	0.852471	5	AFF4	132875395	132963634	ALF transcription elongation factor 4 [Source:HGNC Symbol;Acc:HGNC:17869]	no	no	no	no
ENSG00000072401	827.201	-0.0605175	0.155029	-0.390362	0.696269	0.837507	10	UBE2D1	58334979	58370751	ubiquitin conjugating enzyme E2 D1 [Source:HGNC Symbol;Acc:HGNC:12474]	no	no	no	no
ENSG00000072415	1807.51	-0.286166	0.173411	-1.65022	0.098898	0.260497	14	PALS1	67240713	67336061	protein associated with LIN7 1, MAGUK p55 family member [Source:HGNC Symbol;Acc:HGNC:18669]	no	no	no	no
ENSG00000072422	2334.7	-0.762611	0.255266	-2.98751	0.00281261	0.0173013	10	RHOBTB1	60869438	61001440	Rho related BTB domain containing 1 [Source:HGNC Symbol;Acc:HGNC:18738]	no	no	no	no
ENSG00000072501	4260.24	-0.28839	0.190493	-1.51391	0.130048	0.311293	X	SMC1A	53374149	53422728	structural maintenance of chromosomes 1A [Source:HGNC Symbol;Acc:HGNC:11111]	no	yes	no	no
ENSG00000072506	1228.74	0.034848	0.129227	0.269665	0.787418	0.888628	X	HSD17B10	53431258	53434370	hydroxysteroid 17-beta dehydrogenase 10 [Source:HGNC Symbol;Acc:HGNC:4800]	no	no	no	yes
ENSG00000072518	1434.38	-0.00438543	0.148059	-0.0296195	0.976371	0.988834	11	MARK2	63838928	63911020	microtubule affinity regulating kinase 2 [Source:HGNC Symbol;Acc:HGNC:3332]	no	no	no	no
ENSG00000072571	818.361	0.0114557	0.280124	0.0408952	0.967379	0.985505	5	HMMR	163460203	163491941	hyaluronan mediated motility receptor [Source:HGNC Symbol;Acc:HGNC:5012]	no	no	no	no
ENSG00000072609	1606.42	0.0813061	0.113592	0.715773	0.474132	0.686934	12	CHFR	132822187	132956304	checkpoint with forkhead and ring finger domains [Source:HGNC Symbol;Acc:HGNC:20455]	no	no	no	no
ENSG00000072657	1372.27	13.0589	0.785546	16.624	4.67408e-62	1.53894e-58	12	TRHDE	72087266	72670758	thyrotropin releasing hormone degrading enzyme [Source:HGNC Symbol;Acc:HGNC:30748]	no	no	no	no
ENSG00000072682	14988.1	0.114175	0.129921	0.878806	0.379507	0.608634	5	P4HA2	132190147	132295315	prolyl 4-hydroxylase subunit alpha 2 [Source:HGNC Symbol;Acc:HGNC:8547]	no	no	no	no
ENSG00000072736	752.892	-0.223959	0.196333	-1.14071	0.25399	0.480403	16	NFATC3	68084751	68229259	nuclear factor of activated T cells 3 [Source:HGNC Symbol;Acc:HGNC:7777]	no	no	no	no
ENSG00000072756	824.363	0.229763	0.103409	2.22189	0.0262908	0.0995256	3	TRNT1	3126933	3153435	tRNA nucleotidyl transferase 1 [Source:HGNC Symbol;Acc:HGNC:17341]	no	no	no	no
ENSG00000072778	12917.4	0.0968456	0.124595	0.777284	0.436991	0.658412	17	ACADVL	7217125	7225266	acyl-CoA dehydrogenase very long chain [Source:HGNC Symbol;Acc:HGNC:92]	no	no	no	no
ENSG00000072786	3113.06	-0.149668	0.137316	-1.08995	0.275735	0.505136	5	STK10	172042079	172188224	serine/threonine kinase 10 [Source:HGNC Symbol;Acc:HGNC:11388]	no	no	no	no
ENSG00000072803	2835.57	0.0160747	0.0856362	0.187709	0.851105	0.924581	5	FBXW11	171861549	172006873	F-box and WD repeat domain containing 11 [Source:HGNC Symbol;Acc:HGNC:13607]	no	no	no	no
ENSG00000072818	94.3328	0.563004	0.241299	2.33322	0.0196365	0.0797998	17	ACAP1	7336529	7351477	ArfGAP with coiled-coil, ankyrin repeat and PH domains 1 [Source:HGNC Symbol;Acc:HGNC:16467]	no	no	no	no
ENSG00000072832	894.228	-0.152322	0.165621	-0.919703	0.357728	0.589057	4	CRMP1	5748084	5893086	collapsin response mediator protein 1 [Source:HGNC Symbol;Acc:HGNC:2365]	no	no	no	no
ENSG00000072840	4302.74	-0.25514	0.192912	-1.32257	0.185978	0.395117	4	EVC	5711201	5814305	EvC ciliary complex subunit 1 [Source:HGNC Symbol;Acc:HGNC:3497]	no	no	no	no
ENSG00000072849	1788.53	0.022674	0.134953	0.168014	0.866573	0.933101	17	DERL2	5471254	5486811	derlin 2 [Source:HGNC Symbol;Acc:HGNC:17943]	no	no	no	no
ENSG00000072864	1209.57	0.35716	0.218125	1.63741	0.101545	0.265189	16	NDE1	15643267	15734691	nudE neurodevelopment protein 1 [Source:HGNC Symbol;Acc:HGNC:17619]	no	no	no	no
ENSG00000072952	2402.92	-1.17951	0.258703	-4.5593	5.13238e-06	7.58625e-05	11	IRAG1	10573091	10693988	inositol 1,4,5-triphosphate receptor associated 1 [Source:HGNC Symbol;Acc:HGNC:7237]	no	no	no	no
ENSG00000072958	3483	-0.126612	0.124715	-1.01521	0.310004	0.541552	19	AP1M1	16197854	16245906	adaptor related protein complex 1 subunit mu 1 [Source:HGNC Symbol;Acc:HGNC:13667]	no	no	no	no
ENSG00000073008	3164.99	0.275431	0.108939	2.5283	0.0114616	0.0528347	19	PVR	44643798	44666162	PVR cell adhesion molecule [Source:HGNC Symbol;Acc:HGNC:9705]	no	no	no	no
ENSG00000073050	726.101	0.0309343	0.157599	0.196286	0.844387	0.920958	19	XRCC1	43543311	43580473	X-ray repair cross complementing 1 [Source:HGNC Symbol;Acc:HGNC:12828]	no	no	no	no
ENSG00000073060	392.49	0.457689	0.185917	2.4618	0.0138242	0.0608506	12	SCARB1	124776856	124882668	scavenger receptor class B member 1 [Source:HGNC Symbol;Acc:HGNC:1664]	no	no	no	no
ENSG00000073111	1070.72	-0.669518	0.203669	-3.28729	0.00101158	0.007385	3	MCM2	127598410	127622436	minichromosome maintenance complex component 2 [Source:HGNC Symbol;Acc:HGNC:6944]	no	no	no	no
ENSG00000073146	59.8256	2.87695	0.567851	5.06638	4.0546e-07	7.81831e-06	22	MOV10L1	50089879	50161690	Mov10 like RISC complex RNA helicase 1 [Source:HGNC Symbol;Acc:HGNC:7201]	no	no	no	no
ENSG00000073150	63.4446	-1.08467	0.204098	-5.31445	1.06982e-07	2.28354e-06	22	PANX2	50170731	50180295	pannexin 2 [Source:HGNC Symbol;Acc:HGNC:8600]	no	no	no	no
ENSG00000073169	706.528	-0.337874	0.188397	-1.79342	0.0729061	0.211306	22	SELENOO	50201011	50217616	selenoprotein O [Source:HGNC Symbol;Acc:HGNC:30395]	no	no	no	no
ENSG00000073331	523.89	0.134986	0.131311	1.02799	0.303955	0.534069	4	ALPK1	112285509	112442621	alpha kinase 1 [Source:HGNC Symbol;Acc:HGNC:20917]	no	no	no	no
ENSG00000073417	1781.17	-0.123711	0.100626	-1.22942	0.218914	0.438894	15	PDE8A	84980440	85139145	phosphodiesterase 8A [Source:HGNC Symbol;Acc:HGNC:8793]	no	no	no	no
ENSG00000073464	117.291	1.0271	0.274	3.74854	0.000177865	0.00170486	X	CLCN4	10156975	10237660	chloride voltage-gated channel 4 [Source:HGNC Symbol;Acc:HGNC:2022]	no	no	no	yes
ENSG00000073536	612.898	-0.0840467	0.121294	-0.692918	0.488361	0.698187	17	NLE1	35128730	35142304	notchless homolog 1 [Source:HGNC Symbol;Acc:HGNC:19889]	no	no	no	no
ENSG00000073578	304.068	-0.236747	0.144051	-1.64349	0.100281	0.263026	5	SDHA	218303	257082	succinate dehydrogenase complex flavoprotein subunit A [Source:HGNC Symbol;Acc:HGNC:10680]	no	no	no	no
ENSG00000073584	376.66	-0.287804	0.141564	-2.03303	0.0420492	0.14207	17	SMARCE1	40624962	40648654	SWI/SNF related, matrix associated, actin dependent regulator of chromatin, subfamily e, member 1 [Source:HGNC Symbol;Acc:HGNC:11109]	no	no	no	no
ENSG00000073605	491.021	0.27607	0.24437	1.12972	0.258594	0.48536	17	GSDMB	39904595	39919854	gasdermin B [Source:HGNC Symbol;Acc:HGNC:23690]	no	no	no	no
ENSG00000073614	2988.58	0.0642859	0.0640926	1.00302	0.315853	0.548133	12	KDM5A	280057	389320	lysine demethylase 5A [Source:HGNC Symbol;Acc:HGNC:9886]	no	no	no	no
ENSG00000073711	1935.83	-0.0927099	0.184075	-0.503654	0.614505	0.785783	3	PPP2R3A	135965728	136147894	protein phosphatase 2 regulatory subunit B''alpha [Source:HGNC Symbol;Acc:HGNC:9307]	no	no	no	no
ENSG00000073712	15624.4	0.106739	0.228616	0.466891	0.640578	0.803009	14	FERMT2	52857268	52952435	FERM domain containing kindlin 2 [Source:HGNC Symbol;Acc:HGNC:15767]	no	no	no	no
ENSG00000073756	2183.86	1.8493	0.280801	6.58581	4.52424e-11	1.89156e-09	1	PTGS2	186671791	186680922	prostaglandin-endoperoxide synthase 2 [Source:HGNC Symbol;Acc:HGNC:9605]	no	no	no	no
ENSG00000073792	4470.26	0.246801	0.160938	1.53351	0.125149	0.303036	3	IGF2BP2	185643130	185825042	insulin like growth factor 2 mRNA binding protein 2 [Source:HGNC Symbol;Acc:HGNC:28867]	no	no	no	no
ENSG00000073803	800.237	0.24906	0.126277	1.97232	0.0485729	0.157757	3	MAP3K13	185282941	185489094	mitogen-activated protein kinase kinase kinase 13 [Source:HGNC Symbol;Acc:HGNC:6852]	no	no	no	no
ENSG00000073910	356.963	-0.186358	0.22476	-0.829144	0.407023	0.633628	13	FRY	31846713	32299125	FRY microtubule binding protein [Source:HGNC Symbol;Acc:HGNC:20367]	no	no	no	no
ENSG00000073921	15013.2	-0.247882	0.105765	-2.34372	0.0190927	0.0782116	11	PICALM	85957175	86069882	phosphatidylinositol binding clathrin assembly protein [Source:HGNC Symbol;Acc:HGNC:15514]	no	no	no	no
ENSG00000073969	1705.01	-0.286548	0.0970848	-2.95153	0.00316208	0.0189978	17	NSF	46590669	46757679	N-ethylmaleimide sensitive factor, vesicle fusing ATPase [Source:HGNC Symbol;Acc:HGNC:8016]	no	no	no	no
ENSG00000074047	2426.27	-0.163054	0.208287	-0.782833	0.433725	0.655837	2	GLI2	120735623	120992653	GLI family zinc finger 2 [Source:HGNC Symbol;Acc:HGNC:4318]	no	no	no	no
ENSG00000074054	3137.74	0.0645856	0.0783203	0.824635	0.409579	0.635478	2	CLASP1	121337776	121649476	cytoplasmic linker associated protein 1 [Source:HGNC Symbol;Acc:HGNC:17088]	no	no	no	no
ENSG00000074071	1159.65	-0.0454469	0.119931	-0.378944	0.70473	0.842209	16	MRPS34	1771890	1773150	mitochondrial ribosomal protein S34 [Source:HGNC Symbol;Acc:HGNC:16618]	no	no	no	no
ENSG00000074181	14373.1	0.0116318	0.490976	0.0236912	0.981099	0.990144	19	NOTCH3	15159038	15200995	notch receptor 3 [Source:HGNC Symbol;Acc:HGNC:7883]	no	no	no	no
ENSG00000074201	2122.63	0.0661174	0.118223	0.559258	0.575985	0.761113	11	CLNS1A	77514936	77637794	chloride nucleotide-sensitive channel 1A [Source:HGNC Symbol;Acc:HGNC:2080]	no	no	no	no
ENSG00000074219	1499.02	0.497117	0.171405	2.90025	0.00372859	0.0217667	19	TEAD2	49340595	49362457	TEA domain transcription factor 2 [Source:HGNC Symbol;Acc:HGNC:11715]	no	no	no	no
ENSG00000074266	565.323	-0.364896	0.157602	-2.3153	0.0205964	0.0826492	11	EED	86201212	86278813	embryonic ectoderm development [Source:HGNC Symbol;Acc:HGNC:3188]	no	no	no	no
ENSG00000074319	2397.2	0.00904858	0.164997	0.0548408	0.956265	0.980144	11	TSG101	18468336	18526951	tumor susceptibility 101 [Source:HGNC Symbol;Acc:HGNC:15971]	no	no	no	no
ENSG00000074356	2911.19	0.0635829	0.0939227	0.67697	0.498425	0.705872	17	NCBP3	3802158	3846246	nuclear cap binding subunit 3 [Source:HGNC Symbol;Acc:HGNC:24612]	no	no	no	no
ENSG00000074370	83.1153	0.0946813	0.335195	0.282466	0.777586	0.883971	17	ATP2A3	3923870	3964464	ATPase sarcoplasmic/endoplasmic reticulum Ca2+ transporting 3 [Source:HGNC Symbol;Acc:HGNC:813]	no	no	no	no
ENSG00000074410	5169.65	-0.00316355	0.167977	-0.0188333	0.984974	0.991899	15	CA12	63321378	63381846	carbonic anhydrase 12 [Source:HGNC Symbol;Acc:HGNC:1371]	no	no	no	no
ENSG00000074416	6681.26	-0.435731	0.0874632	-4.98188	6.297e-07	1.15665e-05	3	MGLL	127689062	128052190	monoglyceride lipase [Source:HGNC Symbol;Acc:HGNC:17038]	no	no	no	no
ENSG00000074527	6391.52	3.3705	0.637946	5.28336	1.26834e-07	2.65142e-06	12	NTN4	95657807	95791189	netrin 4 [Source:HGNC Symbol;Acc:HGNC:13658]	no	no	no	no
ENSG00000074582	797.218	0.00844528	0.119677	0.070567	0.943742	0.974907	2	BCS1L	218658764	218663443	BCS1 homolog, ubiquinol-cytochrome c reductase complex chaperone [Source:HGNC Symbol;Acc:HGNC:1020]	no	no	no	no
ENSG00000074590	2916.43	-0.444798	0.223454	-1.99056	0.0465298	0.153369	12	NUAK1	106063345	106138954	NUAK family kinase 1 [Source:HGNC Symbol;Acc:HGNC:14311]	no	no	no	no
ENSG00000074603	2548.1	-0.0899717	0.132065	-0.681268	0.495702	0.704173	15	DPP8	65442463	65517704	dipeptidyl peptidase 8 [Source:HGNC Symbol;Acc:HGNC:16490]	no	no	no	no
ENSG00000074621	604.719	-0.0360011	0.106649	-0.337566	0.73569	0.861401	15	SLC24A1	65611366	65660995	solute carrier family 24 member 1 [Source:HGNC Symbol;Acc:HGNC:10975]	no	no	no	no
ENSG00000074657	4595.2	-0.0124181	0.176539	-0.0703417	0.943922	0.974939	18	ZNF532	58862600	58986480	zinc finger protein 532 [Source:HGNC Symbol;Acc:HGNC:30940]	no	no	no	no
ENSG00000074695	13936	0.158374	0.0932099	1.69911	0.0892981	0.243037	18	LMAN1	59327823	59359265	lectin, mannose binding 1 [Source:HGNC Symbol;Acc:HGNC:6631]	no	no	no	no
ENSG00000074696	4292.99	-0.429866	0.161846	-2.65602	0.00790688	0.0397002	15	HACD3	65530418	65578349	3-hydroxyacyl-CoA dehydratase 3 [Source:HGNC Symbol;Acc:HGNC:24175]	no	no	no	no
ENSG00000074755	2981.03	-0.251106	0.161224	-1.5575	0.119353	0.293913	17	ZZEF1	4004445	4143030	zinc finger ZZ-type and EF-hand domain containing 1 [Source:HGNC Symbol;Acc:HGNC:29027]	no	no	no	no
ENSG00000074800	82374.5	0.354383	0.116474	3.04259	0.0023455	0.0149101	1	ENO1	8861000	8879190	enolase 1 [Source:HGNC Symbol;Acc:HGNC:3350]	no	no	no	no
ENSG00000074842	7337.37	-0.0441524	0.158522	-0.278526	0.780609	0.884735	19	MYDGF	4641374	4670362	myeloid derived growth factor [Source:HGNC Symbol;Acc:HGNC:16948]	no	no	no	no
ENSG00000074855	703.719	0.187134	0.104946	1.78315	0.0745617	0.215225	19	ANO8	17323223	17334855	anoctamin 8 [Source:HGNC Symbol;Acc:HGNC:29329]	no	no	no	no
ENSG00000074935	867.244	-0.232317	0.255758	-0.908348	0.363694	0.594645	6	TUBE1	112070663	112087529	tubulin epsilon 1 [Source:HGNC Symbol;Acc:HGNC:20775]	no	no	no	no
ENSG00000074964	1349.07	-0.461123	0.156748	-2.94181	0.00326302	0.0194893	1	ARHGEF10L	17539698	17697874	Rho guanine nucleotide exchange factor 10 like [Source:HGNC Symbol;Acc:HGNC:25540]	no	no	no	no
ENSG00000075089	644.56	-0.0237379	0.177654	-0.133619	0.893704	0.948761	12	ACTR6	100199122	100241865	actin related protein 6 [Source:HGNC Symbol;Acc:HGNC:24025]	no	no	no	no
ENSG00000075131	288.979	-0.697814	0.204568	-3.41117	0.000646851	0.00511039	15	TIPIN	66336191	66386746	TIMELESS interacting protein [Source:HGNC Symbol;Acc:HGNC:30750]	no	no	no	no
ENSG00000075142	1894.48	-0.22935	0.142117	-1.61381	0.106569	0.273909	7	SRI	88205115	88226993	sorcin [Source:HGNC Symbol;Acc:HGNC:11292]	no	no	no	no
ENSG00000075151	6749.04	-0.174039	0.108583	-1.60281	0.108976	0.277444	1	EIF4G3	20806292	21177285	eukaryotic translation initiation factor 4 gamma 3 [Source:HGNC Symbol;Acc:HGNC:3298]	no	no	no	no
ENSG00000075188	688.94	-0.338263	0.185336	-1.82513	0.0679809	0.201329	12	NUP37	102073103	102120120	nucleoporin 37 [Source:HGNC Symbol;Acc:HGNC:29929]	no	no	no	no
ENSG00000075213	480.86	0.563426	0.337279	1.6705	0.0948198	0.252789	7	SEMA3A	83955777	84492724	semaphorin 3A [Source:HGNC Symbol;Acc:HGNC:10723]	no	no	no	no
ENSG00000075218	1127.73	0.0701993	0.265695	0.26421	0.791618	0.890226	22	GTSE1	46296870	46330810	G2 and S-phase expressed 1 [Source:HGNC Symbol;Acc:HGNC:13698]	no	no	no	no
ENSG00000075223	5335.39	-0.326965	0.303118	-1.07867	0.280733	0.510953	7	SEMA3C	80742538	80922359	semaphorin 3C [Source:HGNC Symbol;Acc:HGNC:10725]	no	no	no	no
ENSG00000075234	881.378	-0.0892925	0.082266	-1.08541	0.277739	0.507524	22	TTC38	46267961	46294008	tetratricopeptide repeat domain 38 [Source:HGNC Symbol;Acc:HGNC:26082]	no	no	no	no
ENSG00000075239	1715.12	-0.312149	0.0984397	-3.17096	0.00151934	0.0103961	11	ACAT1	108116695	108147603	acetyl-CoA acetyltransferase 1 [Source:HGNC Symbol;Acc:HGNC:93]	no	no	no	no
ENSG00000075240	706.425	0.280682	0.187073	1.50039	0.133514	0.317441	22	GRAMD4	46576012	46679790	GRAM domain containing 4 [Source:HGNC Symbol;Acc:HGNC:29113]	no	no	no	no
ENSG00000075275	112.811	3.65022	0.499965	7.30095	2.85736e-13	1.66511e-11	22	CELSR1	46360834	46537620	cadherin EGF LAG seven-pass G-type receptor 1 [Source:HGNC Symbol;Acc:HGNC:1850]	no	no	no	no
ENSG00000075292	3689.72	-0.0225432	0.0840723	-0.268141	0.788591	0.888833	2	ZNF638	71276561	71435069	zinc finger protein 638 [Source:HGNC Symbol;Acc:HGNC:17894]	no	no	no	no
ENSG00000075303	617.077	-0.262153	0.142781	-1.83605	0.0663503	0.197969	7	SLC25A40	87833568	87876360	solute carrier family 25 member 40 [Source:HGNC Symbol;Acc:HGNC:29680]	no	no	no	no
ENSG00000075336	783.493	-0.28906	0.193377	-1.4948	0.134967	0.319696	18	TIMM21	74148523	74160531	translocase of inner mitochondrial membrane 21 [Source:HGNC Symbol;Acc:HGNC:25010]	no	no	no	no
ENSG00000075340	1006.24	1.993	0.828705	2.40495	0.0161745	0.068849	2	ADD2	70607618	70768225	adducin 2 [Source:HGNC Symbol;Acc:HGNC:244]	no	no	no	no
ENSG00000075391	3327.23	-0.298633	0.150989	-1.97785	0.0479455	0.156186	1	RASAL2	178094104	178484147	RAS protein activator like 2 [Source:HGNC Symbol;Acc:HGNC:9874]	no	no	no	no
ENSG00000075399	809.257	0.140963	0.206537	0.682508	0.494918	0.703535	16	VPS9D1	89707134	89720898	VPS9 domain containing 1 [Source:HGNC Symbol;Acc:HGNC:13526]	no	no	no	no
ENSG00000075407	1289.82	0.0120377	0.120665	0.0997611	0.920534	0.962406	10	ZNF37A	38094334	38150293	zinc finger protein 37A [Source:HGNC Symbol;Acc:HGNC:13102]	no	no	no	no
ENSG00000075413	3683.9	0.031775	0.175272	0.181289	0.85614	0.92717	14	MARK3	103385377	103503831	microtubule affinity regulating kinase 3 [Source:HGNC Symbol;Acc:HGNC:6897]	no	no	no	no
ENSG00000075415	16191.2	-0.164104	0.125281	-1.30988	0.190235	0.400693	12	SLC25A3	98593591	98606379	solute carrier family 25 member 3 [Source:HGNC Symbol;Acc:HGNC:10989]	no	no	no	no
ENSG00000075420	10068.7	-0.0242895	0.113596	-0.213823	0.830685	0.912291	3	FNDC3B	172039578	172401669	fibronectin type III domain containing 3B [Source:HGNC Symbol;Acc:HGNC:24670]	no	no	no	no
ENSG00000075426	7745.95	0.115767	0.17537	0.660128	0.509171	0.713675	2	FOSL2	28392448	28417317	FOS like 2, AP-1 transcription factor subunit [Source:HGNC Symbol;Acc:HGNC:3798]	no	no	no	no
ENSG00000075539	2250.33	0.0680577	0.174817	0.389307	0.697049	0.837909	4	FRYL	48497357	48780322	FRY like transcription coactivator [Source:HGNC Symbol;Acc:HGNC:29127]	no	no	no	no
ENSG00000075568	4776.29	-0.203571	0.130685	-1.55773	0.119298	0.293913	2	TMEM131	97756333	97995948	transmembrane protein 131 [Source:HGNC Symbol;Acc:HGNC:30366]	no	no	no	no
ENSG00000075618	16443.7	0.0857596	0.114558	0.748613	0.454091	0.671726	7	FSCN1	5592816	5606655	fascin actin-bundling protein 1 [Source:HGNC Symbol;Acc:HGNC:11148]	no	no	no	no
ENSG00000075624	381316	-0.147604	0.143184	-1.03087	0.302603	0.532548	7	ACTB	5526409	5563902	actin beta [Source:HGNC Symbol;Acc:HGNC:132]	no	no	no	no
ENSG00000075643	672.425	-0.70576	0.310968	-2.26956	0.0232344	0.090478	18	MOCOS	36187497	36272157	molybdenum cofactor sulfurase [Source:HGNC Symbol;Acc:HGNC:18234]	no	no	no	no
ENSG00000075651	305.664	1.07762	0.214375	5.02679	4.98749e-07	9.35688e-06	3	PLD1	171600404	171810950	phospholipase D1 [Source:HGNC Symbol;Acc:HGNC:9067]	no	no	no	no
ENSG00000075702	547.006	-0.322255	0.262726	-1.22658	0.21998	0.440161	19	WDR62	36054649	36105108	WD repeat domain 62 [Source:HGNC Symbol;Acc:HGNC:24502]	no	no	no	no
ENSG00000075711	3330.32	0.082602	0.207885	0.397346	0.691113	0.833894	3	DLG1	197042560	197299330	discs large MAGUK scaffold protein 1 [Source:HGNC Symbol;Acc:HGNC:2900]	no	no	no	no
ENSG00000075785	11923.1	-0.33772	0.149832	-2.25399	0.0241965	0.0933962	3	RAB7A	128693669	128825942	RAB7A, member RAS oncogene family [Source:HGNC Symbol;Acc:HGNC:9788]	no	no	no	no
ENSG00000075826	553.378	0.3909	0.216838	1.80273	0.071431	0.208499	10	SEC31B	100486646	100519864	SEC31 homolog B, COPII coat complex component [Source:HGNC Symbol;Acc:HGNC:23197]	no	no	no	no
ENSG00000075856	1797.11	-0.0658414	0.160737	-0.409622	0.682083	0.829306	12	SART3	108522214	108561400	spliceosome associated factor 3, U4/U6 recycling protein [Source:HGNC Symbol;Acc:HGNC:16860]	no	no	no	no
ENSG00000075914	792.278	0.23866	0.0932306	2.55989	0.0104704	0.0492308	3	EXOSC7	44975241	45036066	exosome component 7 [Source:HGNC Symbol;Acc:HGNC:28112]	no	no	no	no
ENSG00000075945	1956.83	-0.0621727	0.0954709	-0.651221	0.514904	0.717672	1	KIFAP3	169921326	170085208	kinesin associated protein 3 [Source:HGNC Symbol;Acc:HGNC:17060]	no	no	no	no
ENSG00000075975	1780.5	-0.319356	0.171217	-1.86521	0.062152	0.18904	3	MKRN2	12557057	12586208	makorin ring finger protein 2 [Source:HGNC Symbol;Acc:HGNC:7113]	no	no	no	no
ENSG00000076003	2274.15	-0.655522	0.188103	-3.48492	0.000492285	0.00406575	2	MCM6	135839626	135876443	minichromosome maintenance complex component 6 [Source:HGNC Symbol;Acc:HGNC:6949]	no	no	no	no
ENSG00000076043	3269.47	-0.039174	0.0957227	-0.409244	0.68236	0.829413	11	REXO2	114439435	114450279	RNA exonuclease 2 [Source:HGNC Symbol;Acc:HGNC:17851]	no	no	no	no
ENSG00000076053	1186.45	0.0233046	0.168628	0.138201	0.890081	0.946574	11	RBM7	114400030	114414203	RNA binding motif protein 7 [Source:HGNC Symbol;Acc:HGNC:9904]	no	no	no	no
ENSG00000076067	3901.14	0.23062	0.0671982	3.43194	0.00059929	0.00479796	12	RBMS2	56521820	56596193	RNA binding motif single stranded interacting protein 2 [Source:HGNC Symbol;Acc:HGNC:9909]	no	no	no	no
ENSG00000076108	4765.86	0.137333	0.152079	0.903036	0.366507	0.597092	12	BAZ2A	56595596	56636816	bromodomain adjacent to zinc finger domain 2A [Source:HGNC Symbol;Acc:HGNC:962]	no	no	no	no
ENSG00000076201	3770.24	-0.291715	0.201788	-1.44565	0.148275	0.341394	3	PTPN23	47381011	47413435	protein tyrosine phosphatase non-receptor type 23 [Source:HGNC Symbol;Acc:HGNC:14406]	no	no	no	no
ENSG00000076242	1752.17	-0.163725	0.134829	-1.21431	0.224629	0.445772	3	MLH1	36993350	37050846	mutL homolog 1 [Source:HGNC Symbol;Acc:HGNC:7127]	no	no	no	no
ENSG00000076248	1131.8	-0.670919	0.159204	-4.21421	2.50655e-05	0.000299287	12	UNG	109097597	109126725	uracil DNA glycosylase [Source:HGNC Symbol;Acc:HGNC:12572]	no	no	no	no
ENSG00000076258	67.2616	-0.447755	0.240811	-1.85937	0.0629752	0.190682	1	FMO4	171314183	171342084	flavin containing dimethylaniline monoxygenase 4 [Source:HGNC Symbol;Acc:HGNC:3772]	no	no	no	no
ENSG00000076321	1453.17	-0.174062	0.0991245	-1.75599	0.0790898	0.224486	1	KLHL20	173714941	173786692	kelch like family member 20 [Source:HGNC Symbol;Acc:HGNC:25056]	no	no	no	no
ENSG00000076344	122.198	-1.75346	0.232501	-7.54174	4.63751e-14	3.0538e-12	16	RGS11	268301	275980	regulator of G protein signaling 11 [Source:HGNC Symbol;Acc:HGNC:9993]	no	no	no	no
ENSG00000076351	135.014	-0.740387	0.17235	-4.29582	1.74046e-05	0.000216858	17	SLC46A1	28394642	28407197	solute carrier family 46 member 1 [Source:HGNC Symbol;Acc:HGNC:30521]	no	no	no	no
ENSG00000076356	947.688	-0.143619	0.209952	-0.684054	0.493941	0.702733	1	PLXNA2	208022242	208244384	plexin A2 [Source:HGNC Symbol;Acc:HGNC:9100]	no	no	no	no
ENSG00000076382	1434.53	-0.0803608	0.269181	-0.298538	0.765292	0.877494	17	SPAG5	28577565	28599025	sperm associated antigen 5 [Source:HGNC Symbol;Acc:HGNC:13452]	no	no	no	no
ENSG00000076513	6230.38	-0.0491976	0.150538	-0.326812	0.74381	0.86571	12	ANKRD13A	109999186	110039763	ankyrin repeat domain 13A [Source:HGNC Symbol;Acc:HGNC:21268]	no	no	no	no
ENSG00000076555	286.676	-0.156934	0.193958	-0.809112	0.418451	0.643357	12	ACACB	109116587	109268226	acetyl-CoA carboxylase beta [Source:HGNC Symbol;Acc:HGNC:85]	no	no	no	no
ENSG00000076604	1386.7	0.00479735	0.178719	0.026843	0.978585	0.98927	17	TRAF4	28744011	28750956	TNF receptor associated factor 4 [Source:HGNC Symbol;Acc:HGNC:12034]	no	no	no	no
ENSG00000076641	408.975	-0.37825	0.280247	-1.3497	0.177112	0.38289	8	PAG1	80967810	81112068	phosphoprotein membrane anchor with glycosphingolipid microdomains 1 [Source:HGNC Symbol;Acc:HGNC:30043]	no	no	no	no
ENSG00000076650	376.258	-0.299375	0.133226	-2.24711	0.0246329	0.0945818	19	GPATCH1	33080899	33130542	G-patch domain containing 1 [Source:HGNC Symbol;Acc:HGNC:24658]	no	no	no	no
ENSG00000076685	2092.8	-0.24919	0.10832	-2.30049	0.0214204	0.0851002	10	NT5C2	103087185	103277605	5'-nucleotidase, cytosolic II [Source:HGNC Symbol;Acc:HGNC:8022]	no	no	no	no
ENSG00000076706	9371.88	0.362522	0.41452	0.874559	0.381814	0.610847	11	MCAM	119308529	119321521	melanoma cell adhesion molecule [Source:HGNC Symbol;Acc:HGNC:6934]	no	no	no	no
ENSG00000076716	2290.82	-0.583452	0.20451	-2.85292	0.00433189	0.0244344	X	GPC4	133300103	133415489	glypican 4 [Source:HGNC Symbol;Acc:HGNC:4452]	no	no	no	yes
ENSG00000076770	150.601	-0.435936	0.189391	-2.30178	0.0213476	0.0848876	X	MBNL3	132369320	132489968	muscleblind like splicing regulator 3 [Source:HGNC Symbol;Acc:HGNC:20564]	no	no	no	yes
ENSG00000076924	1542	-0.0513008	0.127456	-0.402498	0.687317	0.8316	19	XAB2	7619525	7629545	XPA binding protein 2 [Source:HGNC Symbol;Acc:HGNC:14089]	no	no	no	no
ENSG00000076928	4043.34	-0.0198559	0.135541	-0.146494	0.883531	0.9425	19	ARHGEF1	41883173	41930150	Rho guanine nucleotide exchange factor 1 [Source:HGNC Symbol;Acc:HGNC:681]	no	no	no	no
ENSG00000076944	64.9442	-0.861403	0.364025	-2.36633	0.0179655	0.0745451	19	STXBP2	7636772	7647873	syntaxin binding protein 2 [Source:HGNC Symbol;Acc:HGNC:11445]	no	no	no	no
ENSG00000076984	1402.5	-0.100064	0.159631	-0.626845	0.530761	0.729506	19	MAP2K7	7903843	7914478	mitogen-activated protein kinase kinase 7 [Source:HGNC Symbol;Acc:HGNC:6847]	no	no	no	no
ENSG00000077044	692.188	0.204265	0.134818	1.51512	0.129743	0.310676	2	DGKD	233354494	233472104	diacylglycerol kinase delta [Source:HGNC Symbol;Acc:HGNC:2851]	no	no	no	no
ENSG00000077092	250.273	0.550594	0.490608	1.12227	0.261748	0.489037	3	RARB	24687887	25597932	retinoic acid receptor beta [Source:HGNC Symbol;Acc:HGNC:9865]	no	no	no	no
ENSG00000077097	6623.69	0.00153787	0.115608	0.0133025	0.989386	0.993611	3	TOP2B	25597978	25664909	DNA topoisomerase II beta [Source:HGNC Symbol;Acc:HGNC:11990]	no	no	no	no
ENSG00000077147	11722.9	-0.147135	0.171658	-0.85714	0.391368	0.618988	10	TM9SF3	96518110	96587452	transmembrane 9 superfamily member 3 [Source:HGNC Symbol;Acc:HGNC:21529]	no	no	no	no
ENSG00000077150	1323.29	0.500408	0.154284	3.24341	0.00118107	0.00840797	10	NFKB2	102394110	102402524	nuclear factor kappa B subunit 2 [Source:HGNC Symbol;Acc:HGNC:7795]	no	no	no	no
ENSG00000077152	478.469	-0.252422	0.251961	-1.00183	0.316427	0.548841	1	UBE2T	202331544	202341984	ubiquitin conjugating enzyme E2 T [Source:HGNC Symbol;Acc:HGNC:25009]	no	no	no	no
ENSG00000077157	1153.47	-1.12876	0.257026	-4.39162	1.12509e-05	0.000150584	1	PPP1R12B	202348699	202592706	protein phosphatase 1 regulatory subunit 12B [Source:HGNC Symbol;Acc:HGNC:7619]	no	no	no	no
ENSG00000077232	7202.95	-0.183195	0.131934	-1.38853	0.164975	0.364612	2	DNAJC10	182716255	182794464	DnaJ heat shock protein family (Hsp40) member C10 [Source:HGNC Symbol;Acc:HGNC:24637]	no	no	no	no
ENSG00000077235	4737.75	0.0247359	0.19424	0.127347	0.898666	0.951707	16	GTF3C1	27459555	27549913	general transcription factor IIIC subunit 1 [Source:HGNC Symbol;Acc:HGNC:4664]	no	no	no	no
ENSG00000077238	2752.43	-0.288683	0.168836	-1.70984	0.0872954	0.240067	16	IL4R	27313668	27364778	interleukin 4 receptor [Source:HGNC Symbol;Acc:HGNC:6015]	no	no	no	no
ENSG00000077254	3564.64	-0.277747	0.111177	-2.49824	0.0124813	0.0565653	1	USP33	77695987	77759852	ubiquitin specific peptidase 33 [Source:HGNC Symbol;Acc:HGNC:20059]	no	no	no	no
ENSG00000077312	1694.14	0.129894	0.130874	0.992512	0.320948	0.553659	19	SNRPA	40750637	40765389	small nuclear ribonucleoprotein polypeptide A [Source:HGNC Symbol;Acc:HGNC:11151]	no	no	no	no
ENSG00000077348	235.369	-0.143096	0.157345	-0.909442	0.363117	0.594195	19	EXOSC5	41386371	41397362	exosome component 5 [Source:HGNC Symbol;Acc:HGNC:24662]	no	no	no	no
ENSG00000077380	6809.64	-0.173313	0.13492	-1.28456	0.198945	0.41307	2	DYNC1I2	171687409	171750158	dynein cytoplasmic 1 intermediate chain 2 [Source:HGNC Symbol;Acc:HGNC:2964]	no	no	no	no
ENSG00000077420	613.88	1.38529	1.00104	1.38386	0.166401	0.366117	10	APBB1IP	26438341	26567803	amyloid beta precursor protein binding family B member 1 interacting protein [Source:HGNC Symbol;Acc:HGNC:17379]	no	no	no	no
ENSG00000077454	368.292	-0.209056	0.188948	-1.10642	0.268544	0.496522	7	LRCH4	100574011	100586129	leucine rich repeats and calponin homology domain containing 4 [Source:HGNC Symbol;Acc:HGNC:6691]	no	no	no	no
ENSG00000077458	715.345	0.260073	0.150636	1.7265	0.0842571	0.234453	11	FAM76B	95768953	95790409	family with sequence similarity 76 member B [Source:HGNC Symbol;Acc:HGNC:28492]	no	no	no	no
ENSG00000077463	712.307	-0.0579523	0.174118	-0.332833	0.73926	0.863255	19	SIRT6	4174109	4182566	sirtuin 6 [Source:HGNC Symbol;Acc:HGNC:14934]	no	no	no	no
ENSG00000077514	826.742	-0.468048	0.134523	-3.47933	0.000502672	0.00413245	11	POLD3	74493851	74669117	DNA polymerase delta 3, accessory subunit [Source:HGNC Symbol;Acc:HGNC:20932]	no	no	no	no
ENSG00000077549	16604.7	0.134934	0.0937776	1.43887	0.150188	0.344535	1	CAPZB	19338775	19485539	capping actin protein of muscle Z-line subunit beta [Source:HGNC Symbol;Acc:HGNC:1491]	no	no	no	no
ENSG00000077585	482.769	-0.224728	0.174762	-1.28591	0.198475	0.412458	1	GPR137B	236142505	236221865	G protein-coupled receptor 137B [Source:HGNC Symbol;Acc:HGNC:11862]	no	no	no	no
ENSG00000077684	1455.33	-0.0261161	0.226591	-0.115257	0.908242	0.956617	4	JADE1	128809700	128875224	jade family PHD finger 1 [Source:HGNC Symbol;Acc:HGNC:30027]	no	no	no	no
ENSG00000077713	1723.85	-0.509031	0.0946573	-5.37762	7.54784e-08	1.64851e-06	X	SLC25A43	119399336	119454478	solute carrier family 25 member 43 [Source:HGNC Symbol;Acc:HGNC:30557]	no	no	no	yes
ENSG00000077721	3845.06	-0.185276	0.123769	-1.49695	0.134405	0.31894	X	UBE2A	119474802	119591083	ubiquitin conjugating enzyme E2 A [Source:HGNC Symbol;Acc:HGNC:12472]	no	no	no	yes
ENSG00000077782	8403.46	0.24591	0.157892	1.55745	0.119363	0.293913	8	FGFR1	38400215	38468834	fibroblast growth factor receptor 1 [Source:HGNC Symbol;Acc:HGNC:3688]	no	no	no	no
ENSG00000077942	14916.9	0.863942	0.255945	3.3755	0.000736826	0.00570824	22	FBLN1	45502238	45601135	fibulin 1 [Source:HGNC Symbol;Acc:HGNC:3600]	no	no	no	no
ENSG00000077943	948.359	0.190638	0.283403	0.672676	0.501153	0.707947	10	ITGA8	15513954	15719922	integrin subunit alpha 8 [Source:HGNC Symbol;Acc:HGNC:6144]	no	no	no	no
ENSG00000078018	238.903	2.76583	0.205279	13.4735	2.23985e-41	1.84367e-38	2	MAP2	209424047	209734147	microtubule associated protein 2 [Source:HGNC Symbol;Acc:HGNC:6839]	no	no	no	no
ENSG00000078043	998.093	0.108068	0.147958	0.730394	0.46515	0.680051	18	PIAS2	46803218	46920160	protein inhibitor of activated STAT 2 [Source:HGNC Symbol;Acc:HGNC:17311]	no	no	no	no
ENSG00000078053	1333.02	-0.617947	0.208765	-2.96001	0.0030763	0.0186104	7	AMPH	38383704	38631420	amphiphysin [Source:HGNC Symbol;Acc:HGNC:471]	no	no	no	no
ENSG00000078061	2331.77	-0.108175	0.110475	-0.97918	0.327491	0.559847	X	ARAF	47561205	47571908	A-Raf proto-oncogene, serine/threonine kinase [Source:HGNC Symbol;Acc:HGNC:646]	no	no	no	yes
ENSG00000078070	658.747	-0.705492	0.150756	-4.6797	2.87291e-06	4.49198e-05	3	MCCC1	183015218	183116075	methylcrotonyl-CoA carboxylase subunit 1 [Source:HGNC Symbol;Acc:HGNC:6936]	no	no	no	no
ENSG00000078098	8194.18	0.369644	0.204806	1.80485	0.0710979	0.207803	2	FAP	162170684	162245151	fibroblast activation protein alpha [Source:HGNC Symbol;Acc:HGNC:3590]	no	no	no	no
ENSG00000078124	1082.2	-0.459292	0.155534	-2.95301	0.00314696	0.0189342	11	ACER3	76860859	77026797	alkaline ceramidase 3 [Source:HGNC Symbol;Acc:HGNC:16066]	no	no	no	no
ENSG00000078140	3756.46	-0.0530296	0.173117	-0.306322	0.759359	0.874269	4	UBE2K	39698109	39782792	ubiquitin conjugating enzyme E2 K [Source:HGNC Symbol;Acc:HGNC:4914]	no	no	no	no
ENSG00000078142	1963.48	0.315363	0.0676597	4.66101	3.14657e-06	4.85276e-05	18	PIK3C3	41955234	42087830	phosphatidylinositol 3-kinase catalytic subunit type 3 [Source:HGNC Symbol;Acc:HGNC:8974]	no	no	no	no
ENSG00000078177	662.854	-0.0566741	0.187509	-0.302248	0.762463	0.875959	4	N4BP2	40056797	40158252	NEDD4 binding protein 2 [Source:HGNC Symbol;Acc:HGNC:29851]	no	no	no	no
ENSG00000078237	277.289	-0.668189	0.13594	-4.91532	8.86398e-07	1.58182e-05	12	TIGAR	4307763	4360028	TP53 induced glycolysis regulatory phosphatase [Source:HGNC Symbol;Acc:HGNC:1185]	no	no	no	no
ENSG00000078246	2833.08	0.0653009	0.111229	0.587084	0.557147	0.747971	12	TULP3	2877223	2941138	TUB like protein 3 [Source:HGNC Symbol;Acc:HGNC:12425]	no	no	no	no
ENSG00000078269	7329.3	0.485891	0.201411	2.41243	0.0158465	0.0677371	6	SYNJ2	157981863	158099176	synaptojanin 2 [Source:HGNC Symbol;Acc:HGNC:11504]	no	no	no	no
ENSG00000078304	4120.63	-0.106887	0.17841	-0.599109	0.5491	0.742698	14	PPP2R5C	101761709	101927989	protein phosphatase 2 regulatory subunit B'gamma [Source:HGNC Symbol;Acc:HGNC:9311]	no	no	no	no
ENSG00000078319	363.266	0.0385853	0.137248	0.281135	0.778607	0.884165	7	PMS2P1	100328836	100335860	PMS1 homolog 2, mismatch repair system component pseudogene 1 [Source:HGNC Symbol;Acc:HGNC:9123]	no	no	no	no
ENSG00000078369	22146.5	-0.061974	0.180169	-0.343977	0.730864	0.858497	1	GNB1	1785285	1892292	G protein subunit beta 1 [Source:HGNC Symbol;Acc:HGNC:4396]	no	no	no	no
ENSG00000078399	399.128	-0.494865	0.669731	-0.738901	0.459967	0.676241	7	HOXA9	27162438	27175180	homeobox A9 [Source:HGNC Symbol;Acc:HGNC:5109]	no	no	no	no
ENSG00000078401	783.254	-1.20282	0.180735	-6.65519	2.82926e-11	1.2257e-09	6	EDN1	12290361	12297194	endothelin 1 [Source:HGNC Symbol;Acc:HGNC:3176]	no	no	no	no
ENSG00000078403	1633.63	-0.0354815	0.0939391	-0.377707	0.705648	0.842708	10	MLLT10	21524646	21743630	MLLT10 histone lysine methyltransferase DOT1L cofactor [Source:HGNC Symbol;Acc:HGNC:16063]	no	no	no	no
ENSG00000078487	122.125	-0.0577013	0.195398	-0.295301	0.767764	0.878875	7	ZCWPW1	100400826	100428992	zinc finger CW-type and PWWP domain containing 1 [Source:HGNC Symbol;Acc:HGNC:23486]	no	no	no	no
ENSG00000078618	6686.17	0.14957	0.125758	1.18934	0.234306	0.457397	1	NRDC	51789191	51878805	nardilysin convertase [Source:HGNC Symbol;Acc:HGNC:7995]	no	no	no	no
ENSG00000078668	3155.35	-0.0610824	0.168311	-0.362914	0.716669	0.84927	8	VDAC3	42391624	42405937	voltage dependent anion channel 3 [Source:HGNC Symbol;Acc:HGNC:12674]	no	no	no	no
ENSG00000078674	3922.04	-0.156396	0.100473	-1.5566	0.119565	0.294221	8	PCM1	17922842	18029948	pericentriolar material 1 [Source:HGNC Symbol;Acc:HGNC:8727]	no	no	no	no
ENSG00000078687	604.152	-0.483436	0.125059	-3.86566	0.00011079	0.00112498	17	TNRC6C	77958703	78108822	trinucleotide repeat containing adaptor 6C [Source:HGNC Symbol;Acc:HGNC:29318]	no	no	no	no
ENSG00000078699	1124.49	-0.0588683	0.10182	-0.578161	0.563156	0.751952	20	CBFA2T2	33490075	33650036	CBFA2/RUNX1 partner transcriptional co-repressor 2 [Source:HGNC Symbol;Acc:HGNC:1536]	no	no	no	no
ENSG00000078725	208.602	1.53593	0.910099	1.68765	0.0914787	0.246679	9	BRINP1	119153458	119369435	BMP/retinoic acid inducible neural specific 1 [Source:HGNC Symbol;Acc:HGNC:2687]	no	no	no	no
ENSG00000078747	3917.8	0.0411293	0.120784	0.340521	0.733464	0.860159	20	ITCH	34363235	34511773	itchy E3 ubiquitin protein ligase [Source:HGNC Symbol;Acc:HGNC:13890]	no	no	no	no
ENSG00000078804	1928.56	-0.168527	0.18873	-0.892952	0.371883	0.601807	20	TP53INP2	34704339	34713439	tumor protein p53 inducible nuclear protein 2 [Source:HGNC Symbol;Acc:HGNC:16104]	no	no	no	no
ENSG00000078808	11345.2	-0.189072	0.154997	-1.21985	0.222523	0.443028	1	SDF4	1216931	1232031	stromal cell derived factor 4 [Source:HGNC Symbol;Acc:HGNC:24188]	no	no	no	no
ENSG00000078814	54.3178	0.596243	0.24623	2.42149	0.0154571	0.0664294	20	MYH7B	34955810	35002437	myosin heavy chain 7B [Source:HGNC Symbol;Acc:HGNC:15906]	no	no	no	no
ENSG00000078902	2276.86	-0.514354	0.191854	-2.68097	0.00734094	0.0374584	11	TOLLIP	1274371	1309654	toll interacting protein [Source:HGNC Symbol;Acc:HGNC:16476]	no	no	no	no
ENSG00000078967	276.309	-0.238898	0.142837	-1.67253	0.0944208	0.252133	7	UBE2D4	43926436	43956136	ubiquitin conjugating enzyme E2 D4 (putative) [Source:HGNC Symbol;Acc:HGNC:21647]	no	no	no	no
ENSG00000079102	1172.64	0.366181	0.186933	1.95888	0.0501264	0.161449	8	RUNX1T1	91954972	92103286	RUNX1 partner transcriptional co-repressor 1 [Source:HGNC Symbol;Acc:HGNC:1535]	no	no	no	no
ENSG00000079134	1048.33	0.126904	0.128969	0.983989	0.325121	0.557135	18	THOC1	214520	268050	THO complex subunit 1 [Source:HGNC Symbol;Acc:HGNC:19070]	no	no	no	no
ENSG00000079150	1649.56	-0.0278337	0.13601	-0.204645	0.83785	0.917018	2	FKBP7	178463664	178478600	FKBP prolyl isomerase 7 [Source:HGNC Symbol;Acc:HGNC:3723]	no	no	no	no
ENSG00000079156	868.43	-0.110877	0.22592	-0.490779	0.623583	0.791834	2	OSBPL6	178194481	178402893	oxysterol binding protein like 6 [Source:HGNC Symbol;Acc:HGNC:16388]	no	no	no	no
ENSG00000079215	384.724	-0.119224	0.220369	-0.541021	0.588493	0.769449	5	SLC1A3	36596588	36688334	solute carrier family 1 member 3 [Source:HGNC Symbol;Acc:HGNC:10941]	no	no	no	no
ENSG00000079246	11902.1	-0.226239	0.160712	-1.40773	0.159211	0.3566	2	XRCC5	216107464	216206303	X-ray repair cross complementing 5 [Source:HGNC Symbol;Acc:HGNC:12833]	no	no	no	no
ENSG00000079257	169.313	1.42706	0.285983	4.99001	6.03747e-07	1.11208e-05	3	LXN	158645822	158672648	latexin [Source:HGNC Symbol;Acc:HGNC:13347]	no	no	no	no
ENSG00000079277	982.522	-0.0621158	0.201889	-0.307673	0.758331	0.874002	1	MKNK1	46557407	46616843	MAPK interacting serine/threonine kinase 1 [Source:HGNC Symbol;Acc:HGNC:7110]	no	no	no	no
ENSG00000079308	23007.1	-0.567591	0.206352	-2.75059	0.00594875	0.031578	2	TNS1	217799588	218033982	tensin 1 [Source:HGNC Symbol;Acc:HGNC:11973]	no	no	no	no
ENSG00000079313	1256.68	0.168396	0.143117	1.17663	0.239344	0.463553	19	REXO1	1815248	1848483	RNA exonuclease 1 homolog [Source:HGNC Symbol;Acc:HGNC:24616]	no	no	no	no
ENSG00000079332	8124.66	0.0237528	0.176195	0.13481	0.892762	0.948193	10	SAR1A	70147289	70170523	secretion associated Ras related GTPase 1A [Source:HGNC Symbol;Acc:HGNC:10534]	no	no	no	no
ENSG00000079335	99.6304	-0.600418	0.216087	-2.7786	0.00545939	0.0294432	1	CDC14A	100345001	100520277	cell division cycle 14A [Source:HGNC Symbol;Acc:HGNC:1718]	no	no	no	no
ENSG00000079337	237.771	0.0102369	0.197401	0.0518584	0.958642	0.98114	12	RAPGEF3	47734363	47771040	Rap guanine nucleotide exchange factor 3 [Source:HGNC Symbol;Acc:HGNC:16629]	no	no	no	no
ENSG00000079387	1001.35	-0.122248	0.181161	-0.674804	0.4998	0.706823	12	SENP1	48042897	48106079	SUMO specific peptidase 1 [Source:HGNC Symbol;Acc:HGNC:17927]	no	no	no	no
ENSG00000079432	5391.84	-0.0820953	0.191929	-0.427737	0.668842	0.820322	19	CIC	42268537	42295797	capicua transcriptional repressor [Source:HGNC Symbol;Acc:HGNC:14214]	no	no	no	no
ENSG00000079435	57.4163	0.442749	0.302871	1.46184	0.143785	0.334271	19	LIPE	42401514	42427388	lipase E, hormone sensitive type [Source:HGNC Symbol;Acc:HGNC:6621]	no	no	no	no
ENSG00000079459	3513.85	0.21929	0.131323	1.66985	0.0949493	0.253083	8	FDFT1	11795573	11839304	farnesyl-diphosphate farnesyltransferase 1 [Source:HGNC Symbol;Acc:HGNC:3629]	no	no	no	no
ENSG00000079462	362.23	0.12044	0.214115	0.562503	0.573773	0.76029	19	PAFAH1B3	42297033	42303546	platelet activating factor acetylhydrolase 1b catalytic subunit 3 [Source:HGNC Symbol;Acc:HGNC:8576]	no	no	no	no
ENSG00000079482	777.764	-0.26844	0.182566	-1.47037	0.141461	0.330412	X	OPHN1	67949349	68433913	oligophrenin 1 [Source:HGNC Symbol;Acc:HGNC:8148]	no	no	no	yes
ENSG00000079616	1148.78	0.0265703	0.237887	0.111693	0.911067	0.958179	16	KIF22	29790727	29805385	kinesin family member 22 [Source:HGNC Symbol;Acc:HGNC:6391]	no	no	no	no
ENSG00000079691	542.725	-0.456207	0.198289	-2.30072	0.0214076	0.0851002	6	CARMIL1	25279078	25620530	capping protein regulator and myosin 1 linker 1 [Source:HGNC Symbol;Acc:HGNC:21581]	no	no	no	no
ENSG00000079739	4140	-0.100299	0.187874	-0.533865	0.593435	0.772515	1	PGM1	63593411	63660245	phosphoglucomutase 1 [Source:HGNC Symbol;Acc:HGNC:8905]	no	no	no	no
ENSG00000079785	6142.54	-0.0719332	0.141847	-0.507118	0.612072	0.784295	2	DDX1	15591178	15634346	DEAD-box helicase 1 [Source:HGNC Symbol;Acc:HGNC:2734]	no	no	no	no
ENSG00000079805	5543.43	-0.00256202	0.152659	-0.0167826	0.98661	0.992488	19	DNM2	10718055	10833488	dynamin 2 [Source:HGNC Symbol;Acc:HGNC:2974]	no	no	no	no
ENSG00000079819	7415.71	-0.497223	0.192477	-2.58329	0.0097862	0.0468895	6	EPB41L2	130839347	131063322	erythrocyte membrane protein band 4.1 like 2 [Source:HGNC Symbol;Acc:HGNC:3379]	no	no	no	no
ENSG00000079841	489.866	-4.2645	0.292822	-14.5635	4.79624e-48	5.26388e-45	6	RIMS1	71886550	72403150	regulating synaptic membrane exocytosis 1 [Source:HGNC Symbol;Acc:HGNC:17282]	no	no	no	no
ENSG00000079931	4209.16	-0.447857	0.262408	-1.70672	0.087875	0.24073	6	MOXD1	132296055	132401475	monooxygenase DBH like 1 [Source:HGNC Symbol;Acc:HGNC:21063]	no	no	no	no
ENSG00000079950	3165.74	-0.151093	0.088823	-1.70106	0.0889321	0.24247	6	STX7	132445867	132513198	syntaxin 7 [Source:HGNC Symbol;Acc:HGNC:11442]	no	no	no	no
ENSG00000079974	980.065	-0.119487	0.213891	-0.558634	0.576412	0.761342	22	RABL2B	50767501	50783667	RAB, member of RAS oncogene family like 2B [Source:HGNC Symbol;Acc:HGNC:9800]	no	no	no	no
ENSG00000079999	2167.49	0.00858925	0.0798693	0.107541	0.91436	0.959364	19	KEAP1	10486125	10503558	kelch like ECH associated protein 1 [Source:HGNC Symbol;Acc:HGNC:23177]	no	no	no	no
ENSG00000080189	2290.16	0.101067	0.20023	0.504754	0.613732	0.785605	20	SLC35C2	46345980	46364458	solute carrier family 35 member C2 [Source:HGNC Symbol;Acc:HGNC:17117]	no	no	no	no
ENSG00000080200	1389.62	-0.0409884	0.0670369	-0.61143	0.540915	0.736468	3	CRYBG3	97822011	97944984	crystallin beta-gamma domain containing 3 [Source:HGNC Symbol;Acc:HGNC:34427]	no	no	no	no
ENSG00000080298	193.961	0.596948	0.197687	3.01966	0.00253058	0.0158703	9	RFX3	3218297	3526004	regulatory factor X3 [Source:HGNC Symbol;Acc:HGNC:9984]	no	no	no	no
ENSG00000080345	2988.35	-0.181525	0.138015	-1.31526	0.188423	0.398001	2	RIF1	151409883	151508013	replication timing regulatory factor 1 [Source:HGNC Symbol;Acc:HGNC:23207]	no	no	no	no
ENSG00000080371	2374.54	-0.241569	0.154512	-1.56343	0.117951	0.291558	12	RAB21	71754863	71800286	RAB21, member RAS oncogene family [Source:HGNC Symbol;Acc:HGNC:18263]	no	no	no	no
ENSG00000080493	1076.37	-0.915555	0.227852	-4.01819	5.86457e-05	0.000647413	4	SLC4A4	71062667	71572087	solute carrier family 4 member 4 [Source:HGNC Symbol;Acc:HGNC:11030]	no	no	no	no
ENSG00000080503	5154.12	-0.120988	0.151954	-0.79621	0.42591	0.649576	9	SMARCA2	1980290	2193624	SWI/SNF related, matrix associated, actin dependent regulator of chromatin, subfamily a, member 2 [Source:HGNC Symbol;Acc:HGNC:11098]	no	no	no	no
ENSG00000080546	653.201	-0.621162	0.124296	-4.99745	5.80932e-07	1.07305e-05	6	SESN1	108984309	109094846	sestrin 1 [Source:HGNC Symbol;Acc:HGNC:21595]	no	no	no	no
ENSG00000080561	357.371	-0.167018	0.132897	-1.25675	0.208844	0.426126	X	MID2	107825755	107931637	midline 2 [Source:HGNC Symbol;Acc:HGNC:7096]	no	no	yes	no
ENSG00000080573	9750.29	-0.10632	0.455147	-0.233596	0.815299	0.903998	19	COL5A3	9959561	10010504	collagen type V alpha 3 chain [Source:HGNC Symbol;Acc:HGNC:14864]	no	no	no	no
ENSG00000080603	206.373	-0.326317	0.261477	-1.24798	0.212039	0.43038	16	SRCAP	30698209	30741409	Snf2 related CREBBP activator protein [Source:HGNC Symbol;Acc:HGNC:16974]	no	no	no	no
ENSG00000080608	1784.89	-0.143615	0.165948	-0.865424	0.386806	0.614569	9	PUM3	2720469	2844095	pumilio RNA binding family member 3 [Source:HGNC Symbol;Acc:HGNC:29676]	no	no	no	no
ENSG00000080802	1033.14	-0.20674	0.104768	-1.97332	0.0484589	0.15752	7	CNOT4	135361795	135510145	CCR4-NOT transcription complex subunit 4 [Source:HGNC Symbol;Acc:HGNC:7880]	no	no	no	no
ENSG00000080815	2519.49	-0.0539346	0.149144	-0.361628	0.71763	0.849702	14	PSEN1	73136418	73223691	presenilin 1 [Source:HGNC Symbol;Acc:HGNC:9508]	no	no	no	no
ENSG00000080819	970.332	-0.328324	0.15834	-2.07354	0.0381219	0.132764	3	CPOX	98579446	98593648	coproporphyrinogen oxidase [Source:HGNC Symbol;Acc:HGNC:2321]	no	no	no	no
ENSG00000080822	1888.77	0.16834	0.175371	0.959908	0.337102	0.568339	3	CLDND1	98497912	98523066	claudin domain containing 1 [Source:HGNC Symbol;Acc:HGNC:1322]	no	no	no	no
ENSG00000080823	831.947	-0.0590962	0.220148	-0.268439	0.788362	0.888833	14	MOK	102224500	102305190	MOK protein kinase [Source:HGNC Symbol;Acc:HGNC:9833]	no	no	no	no
ENSG00000080824	36339.1	-0.325063	0.158819	-2.04675	0.0406824	0.138525	14	HSP90AA1	102080742	102139699	heat shock protein 90 alpha family class A member 1 [Source:HGNC Symbol;Acc:HGNC:5253]	no	no	no	no
ENSG00000080839	705.417	-0.691626	0.202142	-3.42148	0.000622813	0.00495637	20	RBL1	36996349	37095997	RB transcriptional corepressor like 1 [Source:HGNC Symbol;Acc:HGNC:9893]	no	no	no	no
ENSG00000080845	7777.8	-0.0381659	0.187774	-0.203255	0.838936	0.917597	20	DLGAP4	36306336	36528637	DLG associated protein 4 [Source:HGNC Symbol;Acc:HGNC:24476]	no	no	no	no
ENSG00000080854	63.2264	4.94125	0.850063	5.81281	6.14346e-09	1.70336e-07	11	IGSF9B	133896438	133956968	immunoglobulin superfamily member 9B [Source:HGNC Symbol;Acc:HGNC:32326]	no	no	no	no
ENSG00000080947	265.85	-0.065156	0.220134	-0.295984	0.767243	0.878812	1	CROCCP3	16474396	16491307	CROCC pseudogene 3 [Source:HGNC Symbol;Acc:HGNC:29405]	no	no	no	no
ENSG00000080986	909.571	-0.130412	0.26742	-0.487667	0.625786	0.793682	18	NDC80	2571557	2616635	NDC80 kinetochore complex component [Source:HGNC Symbol;Acc:HGNC:16909]	no	no	no	no
ENSG00000081014	1408.75	-0.0457651	0.129	-0.354767	0.722764	0.853322	15	AP4E1	50908672	51005895	adaptor related protein complex 4 subunit epsilon 1 [Source:HGNC Symbol;Acc:HGNC:573]	no	no	no	no
ENSG00000081019	709.334	-0.138296	0.151395	-0.913478	0.360991	0.592267	1	RSBN1	113761832	113812476	round spermatid basic protein 1 [Source:HGNC Symbol;Acc:HGNC:25642]	no	no	no	no
ENSG00000081026	921.512	-0.367003	0.177009	-2.07335	0.0381395	0.132764	1	MAGI3	113390515	113685923	membrane associated guanylate kinase, WW and PDZ domain containing 3 [Source:HGNC Symbol;Acc:HGNC:29647]	no	no	no	no
ENSG00000081059	813.607	0.0842102	0.2654	0.317295	0.75102	0.870374	5	TCF7	134114681	134151865	transcription factor 7 [Source:HGNC Symbol;Acc:HGNC:11639]	no	no	no	no
ENSG00000081087	2006.63	-0.728336	0.150911	-4.82625	1.3913e-06	2.34915e-05	6	OSTM1	108029245	108165854	osteoclastogenesis associated transmembrane protein 1 [Source:HGNC Symbol;Acc:HGNC:21652]	no	no	no	no
ENSG00000081154	5575.65	-0.197917	0.172955	-1.14433	0.252489	0.478388	3	PCNP	101574180	101594465	PEST proteolytic signal containing nuclear protein [Source:HGNC Symbol;Acc:HGNC:30023]	no	no	no	no
ENSG00000081177	1138.15	-0.168682	0.172125	-0.98	0.327086	0.559299	14	EXD2	69191498	69244020	exonuclease 3'-5' domain containing 2 [Source:HGNC Symbol;Acc:HGNC:20217]	no	no	no	no
ENSG00000081181	108.859	-0.209964	0.327486	-0.64114	0.521432	0.722565	14	ARG2	67619920	67651708	arginase 2 [Source:HGNC Symbol;Acc:HGNC:664]	no	no	no	no
ENSG00000081189	925.021	-0.370911	0.126453	-2.9332	0.00335491	0.0199297	5	MEF2C	88717117	88904257	myocyte enhancer factor 2C [Source:HGNC Symbol;Acc:HGNC:6996]	no	no	no	no
ENSG00000081277	111.225	1.48586	0.448467	3.31319	0.000922376	0.00682838	1	PKP1	201283452	201332993	plakophilin 1 [Source:HGNC Symbol;Acc:HGNC:9023]	no	no	no	no
ENSG00000081307	2063.1	0.116457	0.127569	0.912897	0.361297	0.592267	3	UBA5	132654446	132679794	ubiquitin like modifier activating enzyme 5 [Source:HGNC Symbol;Acc:HGNC:23230]	no	no	no	no
ENSG00000081320	1971.53	-0.380971	0.132238	-2.88095	0.00396481	0.0228819	2	STK17B	196133583	196176503	serine/threonine kinase 17b [Source:HGNC Symbol;Acc:HGNC:11396]	no	no	no	no
ENSG00000081377	1558.58	-1.0165	0.24718	-4.11239	3.91577e-05	0.000447662	9	CDC14B	96490241	96619843	cell division cycle 14B [Source:HGNC Symbol;Acc:HGNC:1719]	no	no	no	no
ENSG00000081386	458.564	-0.185092	0.179122	-1.03333	0.301448	0.531651	9	ZNF510	96754553	96778129	zinc finger protein 510 [Source:HGNC Symbol;Acc:HGNC:29161]	no	no	no	no
ENSG00000081665	461.424	-0.192495	0.121348	-1.58631	0.11267	0.283396	19	ZNF506	19785839	19821751	zinc finger protein 506 [Source:HGNC Symbol;Acc:HGNC:23780]	no	no	no	no
ENSG00000081692	184.974	-0.106608	0.137525	-0.775191	0.438227	0.658997	1	JMJD4	227730425	227735411	jumonji domain containing 4 [Source:HGNC Symbol;Acc:HGNC:25724]	no	no	no	no
ENSG00000081721	696.621	-0.239204	0.136117	-1.75735	0.0788589	0.224065	1	DUSP12	161749758	161757238	dual specificity phosphatase 12 [Source:HGNC Symbol;Acc:HGNC:3067]	no	no	no	no
ENSG00000081760	1494.21	-0.338968	0.124908	-2.71374	0.00665281	0.0344408	12	AACS	125065434	125143333	acetoacetyl-CoA synthetase [Source:HGNC Symbol;Acc:HGNC:21298]	no	no	no	no
ENSG00000081791	2339.39	0.313437	0.137636	2.27729	0.0227692	0.0891409	5	DELE1	141923855	141942047	DAP3 binding cell death enhancer 1 [Source:HGNC Symbol;Acc:HGNC:28969]	no	no	no	no
ENSG00000081853	218.225	-0.233837	0.192478	-1.21488	0.224413	0.44551	5	PCDHGA2	141338760	141512975	protocadherin gamma subfamily A, 2 [Source:HGNC Symbol;Acc:HGNC:8700]	no	no	no	no
ENSG00000081870	760.273	0.141768	0.120472	1.17678	0.239285	0.463506	1	HSPB11	53916574	53945699	heat shock protein family B (small) member 11 [Source:HGNC Symbol;Acc:HGNC:25019]	no	no	no	no
ENSG00000081913	599.12	-0.319479	0.227108	-1.40673	0.159508	0.356943	18	PHLPP1	62715541	62980433	PH domain and leucine rich repeat protein phosphatase 1 [Source:HGNC Symbol;Acc:HGNC:20610]	no	no	no	no
ENSG00000081923	4185.39	-0.258958	0.168564	-1.53625	0.124476	0.301851	18	ATP8B1	57646426	57803315	ATPase phospholipid transporting 8B1 [Source:HGNC Symbol;Acc:HGNC:3706]	no	no	no	no
ENSG00000082014	1526.25	0.00616611	0.199255	0.0309458	0.975313	0.988067	7	SMARCD3	151238764	151277896	SWI/SNF related, matrix associated, actin dependent regulator of chromatin, subfamily d, member 3 [Source:HGNC Symbol;Acc:HGNC:11108]	no	no	no	no
ENSG00000082068	1103.88	-0.0643959	0.117555	-0.547794	0.583833	0.766356	5	WDR70	37379285	37753435	WD repeat domain 70 [Source:HGNC Symbol;Acc:HGNC:25495]	no	no	no	no
ENSG00000082126	107.63	1.2768	0.197507	6.46459	1.01577e-10	4.01733e-09	2	MPP4	201644870	201698694	MAGUK p55 scaffold protein 4 [Source:HGNC Symbol;Acc:HGNC:13680]	no	no	no	no
ENSG00000082146	1057.45	-0.143035	0.183426	-0.779798	0.43551	0.657383	2	STRADB	201387858	201480846	STE20 related adaptor beta [Source:HGNC Symbol;Acc:HGNC:13205]	no	no	no	no
ENSG00000082153	9879.32	0.024507	0.148545	0.164981	0.868959	0.933991	2	BZW1	200810594	200827338	basic leucine zipper and W2 domains 1 [Source:HGNC Symbol;Acc:HGNC:18380]	no	no	no	no
ENSG00000082196	390.57	0.184849	0.259431	0.712518	0.476144	0.688496	5	C1QTNF3	34017858	34043213	C1q and TNF related 3 [Source:HGNC Symbol;Acc:HGNC:14326]	no	no	no	no
ENSG00000082212	1340	-0.284571	0.16389	-1.73636	0.0825008	0.231326	18	ME2	50879080	50954257	malic enzyme 2 [Source:HGNC Symbol;Acc:HGNC:6984]	no	no	no	no
ENSG00000082213	905.159	-0.588145	0.160647	-3.66111	0.000251127	0.00229836	5	C5orf22	31532287	31555053	chromosome 5 open reading frame 22 [Source:HGNC Symbol;Acc:HGNC:25639]	no	no	no	no
ENSG00000082258	1593.11	-0.0300644	0.106682	-0.281812	0.778088	0.884165	2	CCNT2	134918235	134959342	cyclin T2 [Source:HGNC Symbol;Acc:HGNC:1600]	no	no	no	no
ENSG00000082269	374.019	-0.188982	0.194658	-0.970845	0.331626	0.563114	6	FAM135A	70412941	70561174	family with sequence similarity 135 member A [Source:HGNC Symbol;Acc:HGNC:21084]	no	no	no	no
ENSG00000082397	3080.09	-0.796766	0.330479	-2.41094	0.0159114	0.0679311	18	EPB41L3	5392381	5630700	erythrocyte membrane protein band 4.1 like 3 [Source:HGNC Symbol;Acc:HGNC:3380]	no	no	no	no
ENSG00000082438	1302.26	-1.9562	0.219583	-8.9087	5.16342e-19	6.7329e-17	2	COBLL1	164653624	164843679	cordon-bleu WH2 repeat protein like 1 [Source:HGNC Symbol;Acc:HGNC:23571]	no	no	no	no
ENSG00000082458	524.756	0.270127	0.203077	1.33017	0.183461	0.391664	X	DLG3	70444835	70505490	discs large MAGUK scaffold protein 3 [Source:HGNC Symbol;Acc:HGNC:2902]	no	no	no	yes
ENSG00000082482	6215.84	0.487612	0.246043	1.98182	0.0474995	0.155548	1	KCNK2	215005775	215237090	potassium two pore domain channel subfamily K member 2 [Source:HGNC Symbol;Acc:HGNC:6277]	no	no	no	no
ENSG00000082497	237.573	1.30155	0.309064	4.21126	2.53948e-05	0.000302669	1	SERTAD4	210232796	210246631	SERTA domain containing 4 [Source:HGNC Symbol;Acc:HGNC:25236]	no	no	no	no
ENSG00000082512	2651.38	-0.22625	0.227958	-0.99251	0.320949	0.553659	1	TRAF5	211326615	211374946	TNF receptor associated factor 5 [Source:HGNC Symbol;Acc:HGNC:12035]	no	no	no	no
ENSG00000082515	707.497	-0.0257345	0.175494	-0.14664	0.883416	0.9425	5	MRPL22	154941073	154969411	mitochondrial ribosomal protein L22 [Source:HGNC Symbol;Acc:HGNC:14480]	no	no	no	no
ENSG00000082516	1150.66	-0.285213	0.150952	-1.88943	0.0588343	0.181804	5	GEMIN5	154887411	154938211	gem nuclear organelle associated protein 5 [Source:HGNC Symbol;Acc:HGNC:20043]	no	no	no	no
ENSG00000082641	17706.5	-0.215395	0.135478	-1.58989	0.111859	0.282274	17	NFE2L1	48048329	48061545	NFE2 like bZIP transcription factor 1 [Source:HGNC Symbol;Acc:HGNC:7781]	no	no	no	no
ENSG00000082701	4013.76	0.0797017	0.15792	0.504698	0.613771	0.785605	3	GSK3B	119821321	120094994	glycogen synthase kinase 3 beta [Source:HGNC Symbol;Acc:HGNC:4617]	no	no	no	no
ENSG00000082781	25320	-0.484596	0.169622	-2.85691	0.00427786	0.0242112	3	ITGB5	124761948	124901418	integrin subunit beta 5 [Source:HGNC Symbol;Acc:HGNC:6160]	no	no	no	no
ENSG00000082805	3759.17	-0.107994	0.121268	-0.890541	0.373175	0.602841	12	ERC1	990509	1495933	ELKS/RAB6-interacting/CAST family member 1 [Source:HGNC Symbol;Acc:HGNC:17072]	no	no	no	no
ENSG00000082898	8567.81	-0.258487	0.173483	-1.48998	0.13623	0.321704	2	XPO1	61476032	61538741	exportin 1 [Source:HGNC Symbol;Acc:HGNC:12825]	no	no	no	no
ENSG00000082996	1310.83	0.112291	0.154981	0.724542	0.468733	0.682048	3	RNF13	149812770	149962139	ring finger protein 13 [Source:HGNC Symbol;Acc:HGNC:10057]	no	no	no	no
ENSG00000083093	514.591	-0.488248	0.182884	-2.66971	0.00759159	0.0384575	16	PALB2	23603160	23641321	partner and localizer of BRCA2 [Source:HGNC Symbol;Acc:HGNC:26144]	no	no	no	no
ENSG00000083097	906.122	-0.26811	0.138525	-1.93546	0.0529337	0.16835	6	DOP1A	83067666	83171350	DOP1 leucine zipper like protein A [Source:HGNC Symbol;Acc:HGNC:21194]	no	no	no	no
ENSG00000083099	1452.86	-0.215012	0.195813	-1.09805	0.272182	0.501348	6	LYRM2	89568144	89638749	LYR motif containing 2 [Source:HGNC Symbol;Acc:HGNC:25229]	no	no	no	no
ENSG00000083123	997.429	-0.131233	0.21797	-0.602068	0.547129	0.741083	6	BCKDHB	80106647	80346270	branched chain keto acid dehydrogenase E1 subunit beta [Source:HGNC Symbol;Acc:HGNC:987]	no	no	no	no
ENSG00000083168	2612.22	0.0581334	0.102045	0.569683	0.568893	0.756598	8	KAT6A	41929479	42051994	lysine acetyltransferase 6A [Source:HGNC Symbol;Acc:HGNC:13013]	no	no	no	no
ENSG00000083223	1589.69	0.0180326	0.118924	0.151631	0.879478	0.940446	9	TUT7	86287733	86354454	terminal uridylyl transferase 7 [Source:HGNC Symbol;Acc:HGNC:25817]	no	no	no	no
ENSG00000083290	1369.83	-0.227193	0.184597	-1.23076	0.218414	0.438118	17	ULK2	19770829	19867936	unc-51 like autophagy activating kinase 2 [Source:HGNC Symbol;Acc:HGNC:13480]	no	no	no	no
ENSG00000083312	9059.45	-0.446083	0.129304	-3.44986	0.00056087	0.0045206	5	TNPO1	72816312	72916733	transportin 1 [Source:HGNC Symbol;Acc:HGNC:6401]	no	no	no	no
ENSG00000083444	32462.1	0.400625	0.177946	2.25138	0.0243615	0.0938817	1	PLOD1	11934205	11975538	procollagen-lysine,2-oxoglutarate 5-dioxygenase 1 [Source:HGNC Symbol;Acc:HGNC:9081]	no	no	no	no
ENSG00000083457	597.154	-0.191609	0.131948	-1.45216	0.146457	0.338155	17	ITGAE	3714628	3801188	integrin subunit alpha E [Source:HGNC Symbol;Acc:HGNC:6147]	no	no	no	no
ENSG00000083520	2622.84	-0.073285	0.185778	-0.394477	0.693229	0.835376	13	DIS3	72752169	72782096	DIS3 homolog, exosome endoribonuclease and 3'-5' exoribonuclease [Source:HGNC Symbol;Acc:HGNC:20604]	no	no	no	no
ENSG00000083535	726.661	-0.251173	0.134808	-1.86319	0.0624358	0.189582	13	PIBF1	72782133	73016461	progesterone immunomodulatory binding factor 1 [Source:HGNC Symbol;Acc:HGNC:23352]	no	no	no	no
ENSG00000083544	672.994	0.208163	0.171652	1.21271	0.225242	0.446484	13	TDRD3	60396457	60573878	tudor domain containing 3 [Source:HGNC Symbol;Acc:HGNC:20612]	no	no	no	no
ENSG00000083635	372.844	-0.281106	0.196355	-1.43162	0.152253	0.347305	13	NUFIP1	44939249	44989471	nuclear FMR1 interacting protein 1 [Source:HGNC Symbol;Acc:HGNC:8057]	no	no	no	no
ENSG00000083642	1277.56	-0.26115	0.186265	-1.40203	0.160906	0.358506	13	PDS5B	32586452	32778019	PDS5 cohesin associated factor B [Source:HGNC Symbol;Acc:HGNC:20418]	no	no	no	no
ENSG00000083720	2068.96	-0.843538	0.173833	-4.85257	1.21872e-06	2.10086e-05	5	OXCT1	41730065	41870425	3-oxoacid CoA-transferase 1 [Source:HGNC Symbol;Acc:HGNC:8527]	no	no	no	no
ENSG00000083750	560.888	0.155504	0.153069	1.01591	0.309674	0.541081	X	RRAGB	55717749	55758774	Ras related GTP binding B [Source:HGNC Symbol;Acc:HGNC:19901]	no	no	no	yes
ENSG00000083799	2374.42	-0.248303	0.129068	-1.92382	0.0543777	0.17139	16	CYLD	50742050	50801935	CYLD lysine 63 deubiquitinase [Source:HGNC Symbol;Acc:HGNC:2584]	no	no	no	no
ENSG00000083807	74.8951	0.215967	0.182585	1.18283	0.236877	0.460332	19	SLC27A5	58479512	58512413	solute carrier family 27 member 5 [Source:HGNC Symbol;Acc:HGNC:10999]	no	no	no	no
ENSG00000083812	348.963	-0.0750809	0.142709	-0.526113	0.598809	0.775984	19	ZNF324	58467056	58475436	zinc finger protein 324 [Source:HGNC Symbol;Acc:HGNC:14096]	no	no	no	no
ENSG00000083814	276.352	0.322955	0.163463	1.97571	0.0481879	0.156894	19	ZNF671	57719751	57727624	zinc finger protein 671 [Source:HGNC Symbol;Acc:HGNC:26279]	no	no	no	no
ENSG00000083817	203.786	-0.108587	0.100311	-1.0825	0.279032	0.509395	19	ZNF416	57571566	57578911	zinc finger protein 416 [Source:HGNC Symbol;Acc:HGNC:20645]	no	no	no	no
ENSG00000083828	279.134	0.353232	0.107914	3.27326	0.00106315	0.00770283	19	ZNF586	57769655	57819939	zinc finger protein 586 [Source:HGNC Symbol;Acc:HGNC:25949]	no	no	no	no
ENSG00000083838	181.063	0.219168	0.182083	1.20367	0.228716	0.450118	19	ZNF446	58474017	58481230	zinc finger protein 446 [Source:HGNC Symbol;Acc:HGNC:21036]	no	no	no	no
ENSG00000083844	789.063	0.148778	0.0970969	1.53226	0.125458	0.303505	19	ZNF264	57191500	57222846	zinc finger protein 264 [Source:HGNC Symbol;Acc:HGNC:13057]	no	no	no	no
ENSG00000083845	12052.3	0.159193	0.122086	1.30394	0.192253	0.403437	19	RPS5	58386400	58394806	ribosomal protein S5 [Source:HGNC Symbol;Acc:HGNC:10426]	no	no	no	no
ENSG00000083857	26903.2	-0.660654	0.238818	-2.76635	0.00566872	0.0303484	4	FAT1	186587794	186726722	FAT atypical cadherin 1 [Source:HGNC Symbol;Acc:HGNC:3595]	no	no	no	no
ENSG00000083896	2668.59	0.210666	0.147306	1.43012	0.152682	0.347699	4	YTHDC1	68310387	68350090	YTH domain containing 1 [Source:HGNC Symbol;Acc:HGNC:30626]	no	no	no	no
ENSG00000083937	1986.26	-0.285378	0.214304	-1.33165	0.182976	0.391455	3	CHMP2B	87227271	87255556	charged multivesicular body protein 2B [Source:HGNC Symbol;Acc:HGNC:24537]	no	no	no	no
ENSG00000084070	1737.7	-0.110104	0.197569	-0.557293	0.577327	0.762069	1	SMAP2	40344850	40423326	small ArfGAP2 [Source:HGNC Symbol;Acc:HGNC:25082]	no	no	no	no
ENSG00000084072	1361.13	-0.0631956	0.101402	-0.62322	0.53314	0.730941	1	PPIE	39692182	39763914	peptidylprolyl isomerase E [Source:HGNC Symbol;Acc:HGNC:9258]	no	no	no	no
ENSG00000084073	3662.36	-0.464066	0.0906601	-5.11875	3.07568e-07	6.05711e-06	1	ZMPSTE24	40258041	40294180	zinc metallopeptidase STE24 [Source:HGNC Symbol;Acc:HGNC:12877]	no	no	no	no
ENSG00000084090	4275.43	-0.404978	0.164176	-2.46674	0.0136351	0.0602799	2	STARD7	96184859	96208827	StAR related lipid transfer domain containing 7 [Source:HGNC Symbol;Acc:HGNC:18063]	no	no	no	no
ENSG00000084092	657.609	-0.00960457	0.0993169	-0.0967064	0.92296	0.963871	4	NOA1	56963350	56977606	nitric oxide associated 1 [Source:HGNC Symbol;Acc:HGNC:28473]	no	no	no	no
ENSG00000084093	2277	-0.178568	0.0972201	-1.83674	0.0662486	0.19771	4	REST	56907876	56966808	RE1 silencing transcription factor [Source:HGNC Symbol;Acc:HGNC:9966]	no	no	no	no
ENSG00000084112	8048.99	0.360275	0.083616	4.30869	1.64224e-05	0.00020618	12	SSH1	108778191	108857590	slingshot protein phosphatase 1 [Source:HGNC Symbol;Acc:HGNC:30579]	no	no	no	no
ENSG00000084207	9048.04	0.113066	0.139937	0.807973	0.419106	0.643688	11	GSTP1	67583742	67586656	glutathione S-transferase pi 1 [Source:HGNC Symbol;Acc:HGNC:4638]	no	no	no	no
ENSG00000084234	47727.3	-0.854141	0.185812	-4.59681	4.29018e-06	6.42064e-05	11	APLP2	130068147	130144811	amyloid beta precursor like protein 2 [Source:HGNC Symbol;Acc:HGNC:598]	no	no	no	no
ENSG00000084444	335.759	-0.587171	0.211117	-2.78126	0.00541489	0.0292631	12	FAM234B	13044381	13142521	family with sequence similarity 234 member B [Source:HGNC Symbol;Acc:HGNC:29288]	no	no	no	no
ENSG00000084463	2819.02	-0.160748	0.190496	-0.843841	0.398758	0.62527	12	WBP11	14784582	14803486	WW domain binding protein 11 [Source:HGNC Symbol;Acc:HGNC:16461]	no	no	no	no
ENSG00000084623	7070.14	-0.00755563	0.142325	-0.0530871	0.957663	0.980551	1	EIF3I	32221077	32245397	eukaryotic translation initiation factor 3 subunit I [Source:HGNC Symbol;Acc:HGNC:3272]	no	no	no	no
ENSG00000084636	25302.7	-0.424448	0.12982	-3.2695	0.00107736	0.00779181	1	COL16A1	31652263	31704319	collagen type XVI alpha 1 chain [Source:HGNC Symbol;Acc:HGNC:2193]	no	no	no	no
ENSG00000084652	6174.19	-0.227712	0.108223	-2.10409	0.0353703	0.125526	1	TXLNA	32179675	32198285	taxilin alpha [Source:HGNC Symbol;Acc:HGNC:30685]	no	no	no	no
ENSG00000084676	1287.09	0.0369668	0.119489	0.309375	0.757037	0.873427	2	NCOA1	24491254	24770702	nuclear receptor coactivator 1 [Source:HGNC Symbol;Acc:HGNC:7668]	no	no	no	no
ENSG00000084693	881.011	-0.174433	0.117052	-1.49021	0.136169	0.321675	2	AGBL5	27042364	27070622	AGBL carboxypeptidase 5 [Source:HGNC Symbol;Acc:HGNC:26147]	no	no	no	no
ENSG00000084710	142.227	-1.0425	0.278174	-3.74765	0.0001785	0.00170846	2	EFR3B	25042076	25159135	EFR3 homolog B [Source:HGNC Symbol;Acc:HGNC:29155]	no	no	no	no
ENSG00000084731	1559.29	0.111954	0.136439	0.82054	0.411908	0.637373	2	KIF3C	25926598	25982749	kinesin family member 3C [Source:HGNC Symbol;Acc:HGNC:6321]	no	no	no	no
ENSG00000084733	6365.72	-0.249183	0.170139	-1.46459	0.143034	0.332937	2	RAB10	26034084	26137454	RAB10, member RAS oncogene family [Source:HGNC Symbol;Acc:HGNC:9759]	no	no	no	no
ENSG00000084754	7469.77	-0.251152	0.122442	-2.0512	0.0402478	0.137536	2	HADHA	26190635	26244672	hydroxyacyl-CoA dehydrogenase trifunctional multienzyme complex subunit alpha [Source:HGNC Symbol;Acc:HGNC:4801]	no	no	no	no
ENSG00000084764	573.93	-0.263595	0.154914	-1.70156	0.0888381	0.242386	2	MAPRE3	26970637	27027219	microtubule associated protein RP/EB family member 3 [Source:HGNC Symbol;Acc:HGNC:6892]	no	no	no	no
ENSG00000084774	3900.46	-0.181219	0.18186	-0.996473	0.31902	0.551957	2	CAD	27217369	27243943	carbamoyl-phosphate synthetase 2, aspartate transcarbamylase, and dihydroorotase [Source:HGNC Symbol;Acc:HGNC:1424]	no	no	no	no
ENSG00000085063	23288.8	-0.0776444	0.137316	-0.565442	0.571773	0.758775	11	CD59	33703010	33736479	CD59 molecule (CD59 blood group) [Source:HGNC Symbol;Acc:HGNC:1689]	no	no	no	no
ENSG00000085117	296.799	0.723932	0.2724	2.65761	0.0078697	0.0396041	11	CD82	44564427	44620358	CD82 molecule [Source:HGNC Symbol;Acc:HGNC:6210]	no	no	no	no
ENSG00000085185	954.233	-0.186793	0.227668	-0.820463	0.411952	0.637373	X	BCORL1	129981107	130058071	BCL6 corepressor like 1 [Source:HGNC Symbol;Acc:HGNC:25657]	no	no	no	yes
ENSG00000085224	4234.69	0.0808787	0.154446	0.52367	0.600508	0.776504	X	ATRX	77504880	77786233	ATRX chromatin remodeler [Source:HGNC Symbol;Acc:HGNC:886]	no	no	no	yes
ENSG00000085231	583.323	0.00620455	0.125425	0.0494682	0.960546	0.982482	5	AK6	69350984	69370013	adenylate kinase 6 [Source:HGNC Symbol;Acc:HGNC:49151]	no	no	no	no
ENSG00000085274	707.63	0.0235372	0.161061	0.146138	0.883812	0.942571	3	MYNN	169773396	169789716	myoneurin [Source:HGNC Symbol;Acc:HGNC:14955]	no	no	no	no
ENSG00000085276	125.694	2.55775	0.381848	6.69834	2.10804e-11	9.25429e-10	3	MECOM	169083499	169663775	MDS1 and EVI1 complex locus [Source:HGNC Symbol;Acc:HGNC:3498]	no	no	no	no
ENSG00000085365	2298.87	-0.192687	0.13557	-1.42131	0.155226	0.351199	5	SCAMP1	78360611	78480739	secretory carrier membrane protein 1 [Source:HGNC Symbol;Acc:HGNC:10563]	no	no	no	no
ENSG00000085377	2041.82	-0.0774586	0.172469	-0.449117	0.653348	0.811256	6	PREP	105273218	105454062	prolyl endopeptidase [Source:HGNC Symbol;Acc:HGNC:9358]	no	no	no	no
ENSG00000085382	739.739	-0.00884704	0.143182	-0.0617887	0.950731	0.977818	6	HACE1	104728094	104859919	HECT domain and ankyrin repeat containing E3 ubiquitin protein ligase 1 [Source:HGNC Symbol;Acc:HGNC:21033]	no	no	no	no
ENSG00000085415	1402.01	-0.220434	0.148895	-1.48047	0.138749	0.326075	18	SEH1L	12947133	12987536	SEH1 like nucleoporin [Source:HGNC Symbol;Acc:HGNC:30379]	no	no	no	no
ENSG00000085433	1138.5	-0.190959	0.0668241	-2.85763	0.00426816	0.0241927	1	WDR47	108970214	109042113	WD repeat domain 47 [Source:HGNC Symbol;Acc:HGNC:29141]	no	no	no	no
ENSG00000085449	3223.49	-0.140116	0.103421	-1.35481	0.175478	0.380294	2	WDFY1	223855716	223945357	WD repeat and FYVE domain containing 1 [Source:HGNC Symbol;Acc:HGNC:20451]	no	no	no	no
ENSG00000085491	2483.26	-0.243487	0.0829087	-2.9368	0.00331613	0.0197617	1	SLC25A24	108134043	108200849	solute carrier family 25 member 24 [Source:HGNC Symbol;Acc:HGNC:20662]	no	no	no	no
ENSG00000085511	1699.7	0.244588	0.158379	1.54432	0.122512	0.299043	6	MAP3K4	160991727	161117385	mitogen-activated protein kinase kinase kinase 4 [Source:HGNC Symbol;Acc:HGNC:6856]	no	no	no	no
ENSG00000085644	654.545	0.0500258	0.129589	0.386034	0.699471	0.839442	16	ZNF213	3129777	3142804	zinc finger protein 213 [Source:HGNC Symbol;Acc:HGNC:13005]	no	no	no	no
ENSG00000085662	3796.96	0.170882	0.136373	1.25305	0.210188	0.42798	7	AKR1B1	134442356	134459284	aldo-keto reductase family 1 member B [Source:HGNC Symbol;Acc:HGNC:381]	no	no	no	no
ENSG00000085719	3735.83	-0.338927	0.166642	-2.03386	0.041966	0.141825	8	CPNE3	86514435	86561498	copine 3 [Source:HGNC Symbol;Acc:HGNC:2316]	no	no	no	no
ENSG00000085721	1447.98	-0.0953236	0.169493	-0.562405	0.57384	0.76029	16	RRN3	15060033	15094311	RRN3 homolog, RNA polymerase I transcription factor [Source:HGNC Symbol;Acc:HGNC:30346]	no	no	no	no
ENSG00000085733	17037.8	-0.13451	0.152673	-0.881033	0.3783	0.607661	11	CTTN	70398404	70436584	cortactin [Source:HGNC Symbol;Acc:HGNC:3338]	no	no	no	no
ENSG00000085760	1262.41	-0.133435	0.187229	-0.712681	0.476043	0.688496	2	MTIF2	55236595	55269347	mitochondrial translational initiation factor 2 [Source:HGNC Symbol;Acc:HGNC:7441]	no	no	no	no
ENSG00000085788	2359.24	0.081935	0.048707	1.6822	0.0925295	0.248798	8	DDHD2	38225218	38275558	DDHD domain containing 2 [Source:HGNC Symbol;Acc:HGNC:29106]	no	no	no	no
ENSG00000085832	2722.1	-0.358016	0.140704	-2.54446	0.0109447	0.0510056	1	EPS15	51354263	51519328	epidermal growth factor receptor pathway substrate 15 [Source:HGNC Symbol;Acc:HGNC:3419]	no	no	no	no
ENSG00000085840	220.156	-0.757937	0.255402	-2.96763	0.00300108	0.018256	1	ORC1	52372829	52404423	origin recognition complex subunit 1 [Source:HGNC Symbol;Acc:HGNC:8487]	no	no	no	no
ENSG00000085871	123.194	1.2826	0.221825	5.78203	7.3806e-09	2.01665e-07	4	MGST2	139665768	139740745	microsomal glutathione S-transferase 2 [Source:HGNC Symbol;Acc:HGNC:7063]	no	no	no	no
ENSG00000085872	1259.02	-0.182613	0.147612	-1.23712	0.216043	0.435118	19	CHERP	16517894	16542437	calcium homeostasis endoplasmic reticulum protein [Source:HGNC Symbol;Acc:HGNC:16930]	no	no	no	no
ENSG00000085978	924.96	-0.109896	0.172121	-0.638485	0.523158	0.723434	2	ATG16L1	233210051	233295674	autophagy related 16 like 1 [Source:HGNC Symbol;Acc:HGNC:21498]	no	no	no	no
ENSG00000085982	2437.36	0.0682882	0.115827	0.58957	0.555479	0.747334	2	USP40	233475526	233566782	ubiquitin specific peptidase 40 [Source:HGNC Symbol;Acc:HGNC:20069]	no	no	no	no
ENSG00000085998	3322.91	-0.128181	0.202779	-0.632125	0.527305	0.726423	1	POMGNT1	46188683	46220305	protein O-linked mannose N-acetylglucosaminyltransferase 1 (beta 1,2-) [Source:HGNC Symbol;Acc:HGNC:19139]	no	no	no	no
ENSG00000085999	257.203	-0.158761	0.248566	-0.638707	0.523013	0.723387	1	RAD54L	46246461	46278480	RAD54 like [Source:HGNC Symbol;Acc:HGNC:9826]	no	no	no	no
ENSG00000086015	4294.78	-0.224176	0.185049	-1.21144	0.225727	0.447042	1	MAST2	45786987	46036122	microtubule associated serine/threonine kinase 2 [Source:HGNC Symbol;Acc:HGNC:19035]	no	no	no	no
ENSG00000086061	6082.03	-0.012747	0.132152	-0.0964572	0.923157	0.963925	9	DNAJA1	33025273	33039907	DnaJ heat shock protein family (Hsp40) member A1 [Source:HGNC Symbol;Acc:HGNC:5229]	no	no	no	no
ENSG00000086062	15490.4	-0.564837	0.201134	-2.80826	0.00498097	0.0273787	9	B4GALT1	33104082	33167356	beta-1,4-galactosyltransferase 1 [Source:HGNC Symbol;Acc:HGNC:924]	no	no	no	no
ENSG00000086065	2666.81	0.127015	0.137409	0.924359	0.3553	0.586852	9	CHMP5	33264879	33282070	charged multivesicular body protein 5 [Source:HGNC Symbol;Acc:HGNC:26942]	no	no	no	no
ENSG00000086102	2263.53	-0.246826	0.130467	-1.89187	0.0585083	0.180967	9	NFX1	33290512	33371157	nuclear transcription factor, X-box binding 1 [Source:HGNC Symbol;Acc:HGNC:7803]	no	no	no	no
ENSG00000086189	764.322	-0.372111	0.159142	-2.33824	0.0193749	0.079171	5	DIMT1	62347284	62403943	DIM1 rRNA methyltransferase and ribosome maturation factor [Source:HGNC Symbol;Acc:HGNC:30217]	no	no	no	no
ENSG00000086200	957.696	-0.485979	0.175137	-2.77485	0.00552274	0.029724	5	IPO11	62403972	62628582	importin 11 [Source:HGNC Symbol;Acc:HGNC:20628]	no	no	no	no
ENSG00000086232	4605.34	0.0541341	0.134656	0.402019	0.68767	0.831798	7	EIF2AK1	6022247	6059175	eukaryotic translation initiation factor 2 alpha kinase 1 [Source:HGNC Symbol;Acc:HGNC:24921]	no	no	no	no
ENSG00000086289	1532.02	-1.1863	0.31652	-3.74794	0.000178294	0.00170773	7	EPDR1	37920640	37951936	ependymin related 1 [Source:HGNC Symbol;Acc:HGNC:17572]	no	no	no	no
ENSG00000086475	1935.54	-0.0396861	0.165739	-0.239449	0.810757	0.901146	10	SEPHS1	13317428	13348298	selenophosphate synthetase 1 [Source:HGNC Symbol;Acc:HGNC:19685]	no	no	no	no
ENSG00000086504	1628.11	-0.0558752	0.140177	-0.398605	0.690184	0.833407	16	MRPL28	366969	371289	mitochondrial ribosomal protein L28 [Source:HGNC Symbol;Acc:HGNC:14484]	no	no	no	no
ENSG00000086544	684.811	-0.12629	0.218282	-0.578562	0.562884	0.751921	19	ITPKC	40717112	40740860	inositol-trisphosphate 3-kinase C [Source:HGNC Symbol;Acc:HGNC:14897]	no	no	no	no
ENSG00000086570	38.6161	-1.21771	0.336054	-3.62354	0.000290596	0.00260705	5	FAT2	151504092	151591331	FAT atypical cadherin 2 [Source:HGNC Symbol;Acc:HGNC:3596]	no	no	no	no
ENSG00000086589	1919.88	-0.00139252	0.16271	-0.00855829	0.993172	0.995439	5	RBM22	150690792	150701077	RNA binding motif protein 22 [Source:HGNC Symbol;Acc:HGNC:25503]	no	no	no	no
ENSG00000086598	11874.3	-0.0273857	0.133346	-0.205373	0.837281	0.916472	12	TMED2	123584533	123598582	transmembrane p24 trafficking protein 2 [Source:HGNC Symbol;Acc:HGNC:16996]	no	no	no	no
ENSG00000086619	234.976	-0.169846	0.2096	-0.810334	0.417748	0.642652	1	ERO1B	236214681	236282019	endoplasmic reticulum oxidoreductase 1 beta [Source:HGNC Symbol;Acc:HGNC:14355]	no	no	no	no
ENSG00000086666	2028.78	0.123301	0.132577	0.930033	0.352354	0.583491	15	ZFAND6	80059568	80138393	zinc finger AN1-type containing 6 [Source:HGNC Symbol;Acc:HGNC:30164]	no	no	no	no
ENSG00000086712	525.271	-0.0176446	0.160064	-0.110235	0.912223	0.958664	X	TXLNG	16786432	16844519	taxilin gamma [Source:HGNC Symbol;Acc:HGNC:18578]	no	yes	no	no
ENSG00000086758	11219.2	-0.140682	0.176576	-0.796723	0.425612	0.649576	X	HUWE1	53532096	53686752	HECT, UBA and WWE domain containing E3 ubiquitin protein ligase 1 [Source:HGNC Symbol;Acc:HGNC:30892]	no	no	no	yes
ENSG00000086827	1077.81	-0.325094	0.168306	-1.93157	0.0534125	0.1693	11	ZW10	113733187	113773735	zw10 kinetochore protein [Source:HGNC Symbol;Acc:HGNC:13194]	no	no	no	no
ENSG00000086848	347.418	-0.145724	0.103844	-1.4033	0.160528	0.35826	11	ALG9	111782195	111871581	ALG9 alpha-1,2-mannosyltransferase [Source:HGNC Symbol;Acc:HGNC:15672]	no	no	no	no
ENSG00000086991	112.179	2.45541	0.220867	11.1171	1.03534e-28	3.40885e-26	11	NOX4	89324353	89498187	NADPH oxidase 4 [Source:HGNC Symbol;Acc:HGNC:7891]	no	no	no	no
ENSG00000087008	939.28	-0.168063	0.15755	-1.06673	0.286096	0.516643	4	ACOX3	8366282	8440723	acyl-CoA oxidase 3, pristanoyl [Source:HGNC Symbol;Acc:HGNC:121]	no	no	no	no
ENSG00000087053	3117.05	0.198199	0.212758	0.931569	0.35156	0.582835	11	MTMR2	95821766	95925315	myotubularin related protein 2 [Source:HGNC Symbol;Acc:HGNC:7450]	no	no	no	no
ENSG00000087074	5272.29	0.269786	0.175686	1.53561	0.124633	0.302176	19	PPP1R15A	48872212	48876059	protein phosphatase 1 regulatory subunit 15A [Source:HGNC Symbol;Acc:HGNC:14375]	no	no	no	no
ENSG00000087076	343.226	-1.81655	0.32516	-5.58665	2.31497e-08	5.64596e-07	19	HSD17B14	48813018	48836510	hydroxysteroid 17-beta dehydrogenase 14 [Source:HGNC Symbol;Acc:HGNC:23238]	no	no	no	no
ENSG00000087077	5150.37	-0.231929	0.179231	-1.29403	0.195656	0.408495	7	TRIP6	100867387	100873454	thyroid hormone receptor interactor 6 [Source:HGNC Symbol;Acc:HGNC:12311]	no	no	no	no
ENSG00000087086	83962.2	-0.340376	0.196118	-1.73557	0.0826406	0.231516	19	FTL	48965309	48966879	ferritin light chain [Source:HGNC Symbol;Acc:HGNC:3999]	no	no	no	no
ENSG00000087087	5011.39	0.0823509	0.117316	0.70196	0.482704	0.694019	7	SRRT	100875103	100888664	serrate, RNA effector molecule [Source:HGNC Symbol;Acc:HGNC:24101]	no	no	no	no
ENSG00000087088	4512.15	-0.0195512	0.102396	-0.190936	0.848576	0.923234	19	BAX	48954815	48961798	BCL2 associated X, apoptosis regulator [Source:HGNC Symbol;Acc:HGNC:959]	no	no	no	no
ENSG00000087095	557.361	-0.171867	0.169155	-1.01603	0.309614	0.541081	17	NLK	28041737	28196381	nemo like kinase [Source:HGNC Symbol;Acc:HGNC:29858]	no	no	no	no
ENSG00000087111	3502.34	-0.444255	0.171616	-2.58865	0.00963535	0.0463807	17	PIGS	28553383	28571794	phosphatidylinositol glycan anchor biosynthesis class S [Source:HGNC Symbol;Acc:HGNC:14937]	no	no	no	no
ENSG00000087116	23127.5	-0.335529	0.211112	-1.58934	0.111984	0.2824	5	ADAMTS2	179110853	179345461	ADAM metallopeptidase with thrombospondin type 1 motif 2 [Source:HGNC Symbol;Acc:HGNC:218]	no	no	no	no
ENSG00000087152	3951.78	0.275962	0.136469	2.02217	0.0431592	0.145002	17	ATXN7L3	44191805	44200113	ataxin 7 like 3 [Source:HGNC Symbol;Acc:HGNC:25416]	no	no	no	no
ENSG00000087157	984.349	0.261086	0.129803	2.0114	0.0442837	0.147575	17	PGS1	78378649	78425114	phosphatidylglycerophosphate synthase 1 [Source:HGNC Symbol;Acc:HGNC:30029]	no	no	no	no
ENSG00000087191	3420.9	0.0152801	0.145275	0.105181	0.916233	0.960425	17	PSMC5	63827152	63832026	proteasome 26S subunit, ATPase 5 [Source:HGNC Symbol;Acc:HGNC:9552]	no	no	no	no
ENSG00000087206	1081.19	0.0253295	0.130618	0.19392	0.846238	0.921985	5	UIMC1	176905005	177022633	ubiquitin interaction motif containing 1 [Source:HGNC Symbol;Acc:HGNC:30298]	no	no	no	no
ENSG00000087245	127695	0.14194	0.162647	0.872687	0.382834	0.611661	16	MMP2	55389700	55506691	matrix metallopeptidase 2 [Source:HGNC Symbol;Acc:HGNC:7166]	no	no	no	no
ENSG00000087253	2590.39	0.182149	0.253888	0.71744	0.473103	0.686434	16	LPCAT2	55509072	55586666	lysophosphatidylcholine acyltransferase 2 [Source:HGNC Symbol;Acc:HGNC:26032]	no	no	no	no
ENSG00000087263	2373.44	-0.121625	0.140298	-0.866905	0.385994	0.614325	16	OGFOD1	56451521	56479104	2-oxoglutarate and iron dependent oxygenase domain containing 1 [Source:HGNC Symbol;Acc:HGNC:25585]	no	no	no	no
ENSG00000087266	1988.74	0.183234	0.173481	1.05622	0.290869	0.521026	4	SH3BP2	2793071	2841098	SH3 domain binding protein 2 [Source:HGNC Symbol;Acc:HGNC:10825]	no	no	no	no
ENSG00000087269	1325.02	-0.286406	0.132601	-2.15991	0.0307797	0.112609	4	NOP14	2937933	2963406	NOP14 nucleolar protein [Source:HGNC Symbol;Acc:HGNC:16821]	no	no	no	no
ENSG00000087274	14086.4	-0.0131132	0.0814563	-0.160984	0.872106	0.936073	4	ADD1	2843844	2930076	adducin 1 [Source:HGNC Symbol;Acc:HGNC:243]	no	no	no	no
ENSG00000087299	179.294	-0.488725	0.218041	-2.24144	0.0249976	0.0956197	14	L2HGDH	50237563	50312229	L-2-hydroxyglutarate dehydrogenase [Source:HGNC Symbol;Acc:HGNC:20499]	no	no	no	no
ENSG00000087301	297.538	0.159564	0.0921055	1.73241	0.0832009	0.232444	14	TXNDC16	52430596	52552522	thioredoxin domain containing 16 [Source:HGNC Symbol;Acc:HGNC:19965]	no	no	no	no
ENSG00000087302	3825.48	0.146162	0.15783	0.926072	0.354409	0.585936	14	RTRAF	51989514	52010694	RNA transcription, translation and transport factor [Source:HGNC Symbol;Acc:HGNC:23169]	no	no	no	no
ENSG00000087303	6982.75	0.296386	0.239873	1.2356	0.216609	0.435865	14	NID2	52004809	52069059	nidogen 2 [Source:HGNC Symbol;Acc:HGNC:13389]	no	no	no	no
ENSG00000087338	794.973	-0.217286	0.158007	-1.37516	0.169081	0.370514	2	GMCL1	69829660	69881384	germ cell-less 1, spermatogenesis associated [Source:HGNC Symbol;Acc:HGNC:23843]	no	no	no	no
ENSG00000087365	10295.3	-0.0613712	0.163441	-0.375495	0.707292	0.843643	11	SF3B2	66050729	66069308	splicing factor 3b subunit 2 [Source:HGNC Symbol;Acc:HGNC:10769]	no	no	no	no
ENSG00000087448	2196.94	-0.0894395	0.169617	-0.527304	0.597982	0.775141	12	KLHL42	27780048	27803040	kelch like family member 42 [Source:HGNC Symbol;Acc:HGNC:29252]	no	no	no	no
ENSG00000087460	52547.6	0.125909	0.140606	0.895475	0.370533	0.600828	20	GNAS	58839718	58911192	GNAS complex locus [Source:HGNC Symbol;Acc:HGNC:4392]	no	no	no	no
ENSG00000087470	3804.79	-0.0931863	0.177557	-0.524824	0.599705	0.776292	12	DNM1L	32679200	32745650	dynamin 1 like [Source:HGNC Symbol;Acc:HGNC:2973]	no	no	no	no
ENSG00000087494	66.4696	0.567725	0.534609	1.06194	0.288261	0.518847	12	PTHLH	27958084	27972733	parathyroid hormone like hormone [Source:HGNC Symbol;Acc:HGNC:9607]	no	no	no	no
ENSG00000087495	176.247	3.08534	1.44213	2.13943	0.0324011	0.117386	20	PHACTR3	59577509	59847711	phosphatase and actin regulator 3 [Source:HGNC Symbol;Acc:HGNC:15833]	no	no	no	no
ENSG00000087502	1926.95	-0.379185	0.165466	-2.29162	0.0219278	0.0865155	12	ERGIC2	29337352	29381189	ERGIC and golgi 2 [Source:HGNC Symbol;Acc:HGNC:30208]	no	no	no	no
ENSG00000087510	745.053	0.702651	0.178863	3.92842	8.55041e-05	0.000901399	20	TFAP2C	56629306	56639283	transcription factor AP-2 gamma [Source:HGNC Symbol;Acc:HGNC:11744]	no	no	no	no
ENSG00000087586	1367.01	-0.0685929	0.256896	-0.267007	0.789464	0.889033	20	AURKA	56369389	56392337	aurora kinase A [Source:HGNC Symbol;Acc:HGNC:11393]	no	no	no	no
ENSG00000087589	107.926	-0.218596	0.858023	-0.254767	0.798903	0.894766	20	CASS4	56412112	56460387	Cas scaffold protein family member 4 [Source:HGNC Symbol;Acc:HGNC:15878]	no	no	no	no
ENSG00000087842	160.601	-1.32232	0.233928	-5.65265	1.57994e-08	3.9993e-07	X	PIR	15384799	15493564	pirin [Source:HGNC Symbol;Acc:HGNC:30048]	no	no	yes	no
ENSG00000087884	239.133	-0.0243136	0.172419	-0.141014	0.887859	0.945488	11	AAMDC	77821109	77918432	adipogenesis associated Mth938 domain containing [Source:HGNC Symbol;Acc:HGNC:30205]	no	no	no	no
ENSG00000087903	462.724	0.00457955	0.190316	0.0240629	0.980802	0.990114	19	RFX2	5993164	6199572	regulatory factor X2 [Source:HGNC Symbol;Acc:HGNC:9983]	no	no	no	no
ENSG00000087995	495.029	0.0489096	0.111022	0.440538	0.659547	0.814958	17	METTL2A	62423875	62453385	methyltransferase 2A, methylcytidine [Source:HGNC Symbol;Acc:HGNC:25755]	no	no	no	no
ENSG00000088035	373.17	-0.388633	0.176759	-2.19866	0.0279018	0.104157	1	ALG6	63367575	63438553	ALG6 alpha-1,3-glucosyltransferase [Source:HGNC Symbol;Acc:HGNC:23157]	no	no	no	no
ENSG00000088038	2082.3	0.177228	0.0921526	1.9232	0.0544554	0.17148	19	CNOT3	54137749	54155681	CCR4-NOT transcription complex subunit 3 [Source:HGNC Symbol;Acc:HGNC:7879]	no	no	no	no
ENSG00000088179	606.637	-0.0629318	0.194051	-0.324306	0.745706	0.867039	2	PTPN4	119759922	119984899	protein tyrosine phosphatase non-receptor type 4 [Source:HGNC Symbol;Acc:HGNC:9656]	no	no	no	no
ENSG00000088205	3084.54	0.0488415	0.167004	0.292457	0.769937	0.879909	2	DDX18	117814691	117832377	DEAD-box helicase 18 [Source:HGNC Symbol;Acc:HGNC:2741]	no	no	no	no
ENSG00000088247	7538.98	-0.147179	0.144881	-1.01586	0.309694	0.541081	19	KHSRP	6413102	6424811	KH-type splicing regulatory protein [Source:HGNC Symbol;Acc:HGNC:6316]	no	no	no	no
ENSG00000088256	3892.33	-0.238694	0.13596	-1.75561	0.0791544	0.224572	19	GNA11	3094362	3123999	G protein subunit alpha 11 [Source:HGNC Symbol;Acc:HGNC:4379]	no	no	no	no
ENSG00000088280	1124.52	-0.256776	0.213727	-1.20142	0.229588	0.451362	1	ASAP3	23428563	23484568	ArfGAP with SH3 domain, ankyrin repeat and PH domain 3 [Source:HGNC Symbol;Acc:HGNC:14987]	no	no	no	no
ENSG00000088298	1107.57	-0.231292	0.0944285	-2.44939	0.0143099	0.0624456	20	EDEM2	35115364	35147336	ER degradation enhancing alpha-mannosidase like protein 2 [Source:HGNC Symbol;Acc:HGNC:15877]	no	no	no	no
ENSG00000088305	298.796	0.0881863	0.230027	0.383374	0.701443	0.840286	20	DNMT3B	32762385	32809359	DNA methyltransferase 3 beta [Source:HGNC Symbol;Acc:HGNC:2979]	no	no	no	no
ENSG00000088325	4364.34	-0.179429	0.254193	-0.705877	0.480265	0.692023	20	TPX2	31739271	31801805	TPX2 microtubule nucleation factor [Source:HGNC Symbol;Acc:HGNC:1249]	no	no	no	no
ENSG00000088340	454.312	0.899709	0.270052	3.33161	0.000863461	0.00647596	20	FER1L4	35558737	35607562	fer-1 like family member 4 (pseudogene) [Source:HGNC Symbol;Acc:HGNC:15801]	no	no	no	no
ENSG00000088356	476.115	-0.123883	0.0944896	-1.31107	0.189833	0.400273	20	PDRG1	31944337	31952046	p53 and DNA damage regulated 1 [Source:HGNC Symbol;Acc:HGNC:16119]	no	no	no	no
ENSG00000088367	1483.99	-0.148475	0.149791	-0.991218	0.321579	0.554195	20	EPB41L1	36091504	36232799	erythrocyte membrane protein band 4.1 like 1 [Source:HGNC Symbol;Acc:HGNC:3378]	no	no	no	no
ENSG00000088387	715.742	0.315835	0.191845	1.64631	0.0997008	0.262193	13	DOCK9	98793429	99086625	dedicator of cytokinesis 9 [Source:HGNC Symbol;Acc:HGNC:14132]	no	no	no	no
ENSG00000088448	1676.05	0.0960467	0.219499	0.437573	0.661696	0.815815	13	ANKRD10	110878540	110915069	ankyrin repeat domain 10 [Source:HGNC Symbol;Acc:HGNC:20265]	no	no	no	no
ENSG00000088451	391.052	-0.0987873	0.17588	-0.561676	0.574337	0.760432	13	TGDS	94574054	94596242	TDP-glucose 4,6-dehydratase [Source:HGNC Symbol;Acc:HGNC:20324]	no	no	no	no
ENSG00000088538	87.4644	0.624614	0.214212	2.91587	0.00354698	0.020901	3	DOCK3	50674927	51384198	dedicator of cytokinesis 3 [Source:HGNC Symbol;Acc:HGNC:2989]	no	no	no	no
ENSG00000088543	719.293	-0.0445189	0.142498	-0.312419	0.754722	0.872293	3	C3orf18	50558025	50571027	chromosome 3 open reading frame 18 [Source:HGNC Symbol;Acc:HGNC:24837]	no	no	no	no
ENSG00000088682	785.507	0.0543784	0.125324	0.433901	0.66436	0.817703	16	COQ9	57447425	57461270	coenzyme Q9 [Source:HGNC Symbol;Acc:HGNC:25302]	no	no	no	no
ENSG00000088727	89.1119	-0.00343755	0.230264	-0.0149287	0.988089	0.993141	3	KIF9	47227998	47283451	kinesin family member 9 [Source:HGNC Symbol;Acc:HGNC:16666]	no	no	no	no
ENSG00000088756	182.695	2.39703	0.39404	6.08323	1.17786e-09	3.7566e-08	18	ARHGAP28	6729716	6915716	Rho GTPase activating protein 28 [Source:HGNC Symbol;Acc:HGNC:25509]	no	no	no	no
ENSG00000088766	146.198	0.518076	0.184884	2.80216	0.00507613	0.0277523	20	CRLS1	6006093	6040053	cardiolipin synthase 1 [Source:HGNC Symbol;Acc:HGNC:16148]	no	no	no	no
ENSG00000088808	246.173	-0.39785	0.165201	-2.40829	0.0160276	0.0682898	14	PPP1R13B	103733195	103847575	protein phosphatase 1 regulatory subunit 13B [Source:HGNC Symbol;Acc:HGNC:14950]	no	no	no	no
ENSG00000088812	4477.63	-0.0579092	0.0937651	-0.617599	0.53684	0.733574	20	ATRN	3471018	3651118	attractin [Source:HGNC Symbol;Acc:HGNC:885]	no	no	no	no
ENSG00000088826	587.731	0.802719	0.149938	5.35367	8.61865e-08	1.86998e-06	20	SMOX	4120980	4187747	spermine oxidase [Source:HGNC Symbol;Acc:HGNC:15862]	no	no	no	no
ENSG00000088832	11718.6	0.0811502	0.157732	0.51448	0.606916	0.781263	20	FKBP1A	1368977	1393164	FKBP prolyl isomerase 1A [Source:HGNC Symbol;Acc:HGNC:3711]	no	no	no	no
ENSG00000088833	2506.1	-0.013946	0.128532	-0.108503	0.913597	0.959292	20	NSFL1C	1442162	1473842	NSFL1 cofactor [Source:HGNC Symbol;Acc:HGNC:15912]	no	no	no	no
ENSG00000088836	64.2527	-1.07882	0.263077	-4.10078	4.11757e-05	0.000467486	20	SLC4A11	3227417	3239559	solute carrier family 4 member 11 [Source:HGNC Symbol;Acc:HGNC:16438]	no	no	no	no
ENSG00000088854	1935.92	-0.146639	0.12335	-1.1888	0.234518	0.457397	20	DNAAF9	3249306	3407669	dynein axonemal assembly factor 9 [Source:HGNC Symbol;Acc:HGNC:17721]	no	no	no	no
ENSG00000088876	517.076	-0.127347	0.164114	-0.775963	0.437771	0.658997	20	ZNF343	2481817	2524702	zinc finger protein 343 [Source:HGNC Symbol;Acc:HGNC:16017]	no	no	no	no
ENSG00000088881	81.9886	3.41278	0.38163	8.94264	3.79967e-19	5.05471e-17	20	EBF4	2692780	2760108	EBF family member 4 [Source:HGNC Symbol;Acc:HGNC:29278]	no	no	no	no
ENSG00000088882	244.46	2.16147	0.31751	6.80756	9.92706e-12	4.63615e-10	20	CPXM1	2794074	2800627	carboxypeptidase X, M14 family member 1 [Source:HGNC Symbol;Acc:HGNC:15771]	no	no	no	no
ENSG00000088888	5968.93	0.00139243	0.0865555	0.0160872	0.987165	0.992819	20	MAVS	3846799	3876123	mitochondrial antiviral signaling protein [Source:HGNC Symbol;Acc:HGNC:29233]	no	no	no	no
ENSG00000088899	293.063	0.128689	0.245338	0.524539	0.599904	0.776408	20	LZTS3	3162617	3173549	leucine zipper tumor suppressor family member 3 [Source:HGNC Symbol;Acc:HGNC:30139]	no	no	no	no
ENSG00000088930	4258.59	-0.140023	0.137426	-1.0189	0.308252	0.539205	20	XRN2	21303331	21389825	5'-3' exoribonuclease 2 [Source:HGNC Symbol;Acc:HGNC:12836]	no	no	no	no
ENSG00000088970	702.196	0.0607861	0.203241	0.299084	0.764876	0.877267	20	KIZ	21125983	21246622	kizuna centrosomal protein [Source:HGNC Symbol;Acc:HGNC:15865]	no	no	no	no
ENSG00000088986	7592.4	-0.103276	0.121969	-0.846746	0.397137	0.624075	12	DYNLL1	120469850	120498493	dynein light chain LC8-type 1 [Source:HGNC Symbol;Acc:HGNC:15476]	no	no	no	no
ENSG00000089006	3387.66	-0.0345532	0.189054	-0.182769	0.854979	0.926526	20	SNX5	17941597	17968980	sorting nexin 5 [Source:HGNC Symbol;Acc:HGNC:14969]	no	no	no	no
ENSG00000089009	26128.6	0.0689536	0.157522	0.43774	0.661574	0.815742	12	RPL6	112405189	112418838	ribosomal protein L6 [Source:HGNC Symbol;Acc:HGNC:10362]	no	no	no	no
ENSG00000089022	1092.98	-0.0514879	0.133062	-0.386946	0.698796	0.838938	12	MAPKAPK5	111842228	111902222	MAPK activated protein kinase 5 [Source:HGNC Symbol;Acc:HGNC:6889]	no	no	no	no
ENSG00000089048	985.922	-0.444578	0.165062	-2.6934	0.00707273	0.0362584	20	ESF1	13714322	13784919	ESF1 nucleolar pre-rRNA processing protein homolog [Source:HGNC Symbol;Acc:HGNC:15898]	no	no	no	no
ENSG00000089050	906.029	-0.475732	0.183114	-2.59801	0.00937667	0.0455038	20	RBBP9	18486540	18497225	RB binding protein 9, serine hydrolase [Source:HGNC Symbol;Acc:HGNC:9892]	no	no	no	no
ENSG00000089053	5370.13	0.0248683	0.140044	0.177575	0.859057	0.92855	12	ANAPC5	121308245	121399896	anaphase promoting complex subunit 5 [Source:HGNC Symbol;Acc:HGNC:15713]	no	no	no	no
ENSG00000089057	1410.21	-0.566564	0.149325	-3.79416	0.000148143	0.00145491	20	SLC23A2	4852356	5010293	solute carrier family 23 member 2 [Source:HGNC Symbol;Acc:HGNC:10973]	no	no	no	no
ENSG00000089060	758.492	-0.63983	0.217065	-2.94764	0.00320214	0.0191779	12	SLC8B1	113298759	113359493	solute carrier family 8 member B1 [Source:HGNC Symbol;Acc:HGNC:26175]	no	no	no	no
ENSG00000089063	4513.77	-0.332742	0.0754783	-4.40845	1.04112e-05	0.0001402	20	TMEM230	5068232	5113103	transmembrane protein 230 [Source:HGNC Symbol;Acc:HGNC:15876]	no	no	no	no
ENSG00000089091	138.671	0.0544289	0.148584	0.366318	0.714128	0.848144	20	DZANK1	18383367	18467281	double zinc ribbon and ankyrin repeat domains 1 [Source:HGNC Symbol;Acc:HGNC:15858]	no	no	no	no
ENSG00000089094	1089.6	0.1048	0.110696	0.946732	0.343775	0.576026	12	KDM2B	121429096	121581023	lysine demethylase 2B [Source:HGNC Symbol;Acc:HGNC:13610]	no	no	no	no
ENSG00000089123	249.749	-0.0741606	0.122769	-0.604069	0.545798	0.740592	20	TASP1	13389392	13638932	taspase 1 [Source:HGNC Symbol;Acc:HGNC:15859]	no	no	no	no
ENSG00000089127	95.0907	4.63561	1.6246	2.85338	0.00432562	0.0244185	12	OAS1	112905856	112933219	2'-5'-oligoadenylate synthetase 1 [Source:HGNC Symbol;Acc:HGNC:8086]	no	no	no	no
ENSG00000089154	7424.96	-0.000429294	0.1754	-0.00244752	0.998047	0.998579	12	GCN1	120127202	120194715	GCN1 activator of EIF2AK4 [Source:HGNC Symbol;Acc:HGNC:4199]	no	no	no	no
ENSG00000089157	46444.4	0.0902175	0.128623	0.70141	0.483047	0.694263	12	RPLP0	120196699	120201235	ribosomal protein lateral stalk subunit P0 [Source:HGNC Symbol;Acc:HGNC:10371]	no	no	no	no
ENSG00000089159	6436.88	0.0150739	0.173615	0.0868236	0.930812	0.967392	12	PXN	120210439	120265771	paxillin [Source:HGNC Symbol;Acc:HGNC:9718]	no	no	no	no
ENSG00000089177	566.405	-0.202022	0.122934	-1.64334	0.100312	0.263026	20	KIF16B	16272104	16573448	kinesin family member 16B [Source:HGNC Symbol;Acc:HGNC:15869]	no	no	no	no
ENSG00000089195	715.402	-0.396111	0.164307	-2.41079	0.0159179	0.0679311	20	TRMT6	5937228	5950558	tRNA methyltransferase 6 non-catalytic subunit [Source:HGNC Symbol;Acc:HGNC:20900]	no	no	no	no
ENSG00000089220	8303.5	-0.145502	0.124136	-1.17212	0.241149	0.465891	12	PEBP1	118136124	118145584	phosphatidylethanolamine binding protein 1 [Source:HGNC Symbol;Acc:HGNC:8630]	no	no	no	no
ENSG00000089225	648.358	0.967354	0.631703	1.53134	0.125685	0.303942	12	TBX5	114353911	114408442	T-box transcription factor 5 [Source:HGNC Symbol;Acc:HGNC:11604]	no	no	no	no
ENSG00000089234	939.491	-0.139945	0.14861	-0.941691	0.346351	0.578089	12	BRAP	111642146	111685956	BRCA1 associated protein [Source:HGNC Symbol;Acc:HGNC:1099]	no	no	no	no
ENSG00000089248	5084.18	-0.156311	0.174679	-0.89485	0.370867	0.601073	12	ERP29	112013348	112023449	endoplasmic reticulum protein 29 [Source:HGNC Symbol;Acc:HGNC:13799]	no	no	no	no
ENSG00000089280	15378.6	0.126749	0.124202	1.02051	0.307489	0.538362	16	FUS	31180138	31191605	FUS RNA binding protein [Source:HGNC Symbol;Acc:HGNC:4010]	no	no	no	no
ENSG00000089289	1366.2	0.0387336	0.159673	0.242581	0.80833	0.900005	X	IGBP1	70133447	70166324	immunoglobulin binding protein 1 [Source:HGNC Symbol;Acc:HGNC:5461]	no	no	no	yes
ENSG00000089327	5665.85	-0.340266	0.132764	-2.56294	0.0103789	0.0488825	19	FXYD5	35154730	35169881	FXYD domain containing ion transport regulator 5 [Source:HGNC Symbol;Acc:HGNC:4029]	no	no	no	no
ENSG00000089335	1178.66	-0.0408786	0.146158	-0.279688	0.779717	0.884542	19	ZNF302	34677639	34686397	zinc finger protein 302 [Source:HGNC Symbol;Acc:HGNC:13848]	no	no	no	no
ENSG00000089351	1936.55	0.160773	0.140035	1.14809	0.250931	0.47681	19	GRAMD1A	34994784	35026471	GRAM domain containing 1A [Source:HGNC Symbol;Acc:HGNC:29305]	no	no	no	no
ENSG00000089472	3498.05	0.287713	0.18241	1.57728	0.11473	0.286697	X	HEPH	66162671	66268867	hephaestin [Source:HGNC Symbol;Acc:HGNC:4866]	no	no	no	yes
ENSG00000089486	713.094	-0.272297	0.229159	-1.18825	0.234737	0.45758	16	CDIP1	4510669	4538828	cell death inducing p53 target 1 [Source:HGNC Symbol;Acc:HGNC:13234]	no	no	no	no
ENSG00000089597	32079.8	0.0345587	0.0806444	0.428532	0.668264	0.819845	11	GANAB	62624826	62646726	glucosidase II alpha subunit [Source:HGNC Symbol;Acc:HGNC:4138]	no	no	no	no
ENSG00000089639	459.994	-0.0431581	0.128248	-0.33652	0.736478	0.861599	19	GMIP	19629476	19643657	GEM interacting protein [Source:HGNC Symbol;Acc:HGNC:24852]	no	no	no	no
ENSG00000089682	549.684	0.190263	0.0983542	1.93447	0.0530553	0.168544	X	RBM41	107061885	107118823	RNA binding motif protein 41 [Source:HGNC Symbol;Acc:HGNC:25617]	no	no	no	yes
ENSG00000089685	2113.27	0.310192	0.272086	1.14005	0.254265	0.480716	17	BIRC5	78214186	78225636	baculoviral IAP repeat containing 5 [Source:HGNC Symbol;Acc:HGNC:593]	no	no	no	no
ENSG00000089692	81.7101	0.114185	0.20466	0.557924	0.576896	0.761884	12	LAG3	6772512	6778455	lymphocyte activating 3 [Source:HGNC Symbol;Acc:HGNC:6476]	no	no	no	no
ENSG00000089693	7150.65	0.11438	0.146202	0.782346	0.434011	0.655953	12	MLF2	6747996	6767475	myeloid leukemia factor 2 [Source:HGNC Symbol;Acc:HGNC:7126]	no	no	no	no
ENSG00000089723	67.3976	-0.255338	0.210758	-1.21152	0.225697	0.447042	14	OTUB2	94026340	94048930	OTU deubiquitinase, ubiquitin aldehyde binding 2 [Source:HGNC Symbol;Acc:HGNC:20351]	no	no	no	no
ENSG00000089737	4770.26	-0.305838	0.122334	-2.50002	0.0124187	0.0563787	14	DDX24	94048287	94081202	DEAD-box helicase 24 [Source:HGNC Symbol;Acc:HGNC:13266]	no	no	no	no
ENSG00000089775	532.66	0.130304	0.159697	0.81595	0.414529	0.639476	14	ZBTB25	64449106	64505213	zinc finger and BTB domain containing 25 [Source:HGNC Symbol;Acc:HGNC:13112]	no	no	no	no
ENSG00000089818	851.583	-0.109131	0.113893	-0.958187	0.337969	0.569333	12	NECAP1	8076939	8097881	NECAP endocytosis associated 1 [Source:HGNC Symbol;Acc:HGNC:24539]	no	no	no	no
ENSG00000089876	1154.13	0.280351	0.103635	2.70518	0.00682677	0.0351755	10	DHX32	125836337	125896436	DEAH-box helicase 32 (putative) [Source:HGNC Symbol;Acc:HGNC:16717]	no	no	no	no
ENSG00000089902	2146.86	0.0263076	0.125549	0.209541	0.834026	0.914353	14	RCOR1	102592649	102730561	REST corepressor 1 [Source:HGNC Symbol;Acc:HGNC:17441]	no	no	no	no
ENSG00000089916	2094.82	0.110011	0.106714	1.0309	0.302589	0.532548	14	GPATCH2L	76151916	76254342	G-patch domain containing 2 like [Source:HGNC Symbol;Acc:HGNC:20210]	no	no	no	no
ENSG00000090006	1451.12	-0.100137	0.193697	-0.516977	0.605172	0.779855	19	LTBP4	40592883	40629818	latent transforming growth factor beta binding protein 4 [Source:HGNC Symbol;Acc:HGNC:6717]	no	no	no	no
ENSG00000090013	929.49	-0.501819	0.172142	-2.91514	0.00355524	0.0209216	19	BLVRB	40447765	40465764	biliverdin reductase B [Source:HGNC Symbol;Acc:HGNC:1063]	no	no	no	no
ENSG00000090020	2392.23	-0.0414494	0.130777	-0.316947	0.751284	0.870527	1	SLC9A1	27098809	27166981	solute carrier family 9 member A1 [Source:HGNC Symbol;Acc:HGNC:11071]	no	no	no	no
ENSG00000090054	4058.28	-0.156212	0.107113	-1.45839	0.144734	0.335886	9	SPTLC1	92000087	92115413	serine palmitoyltransferase long chain base subunit 1 [Source:HGNC Symbol;Acc:HGNC:11277]	no	no	no	no
ENSG00000090060	6761.48	-0.0990188	0.153177	-0.646434	0.517998	0.720308	14	PAPOLA	96501433	96567116	poly(A) polymerase alpha [Source:HGNC Symbol;Acc:HGNC:14981]	no	no	no	no
ENSG00000090061	1072.27	-0.0798517	0.143754	-0.555475	0.57857	0.762739	14	CCNK	99481169	99535044	cyclin K [Source:HGNC Symbol;Acc:HGNC:1596]	no	no	no	no
ENSG00000090097	2447.51	0.0691118	0.0805296	0.858217	0.390773	0.618533	3	PCBP4	51957454	51974016	poly(rC) binding protein 4 [Source:HGNC Symbol;Acc:HGNC:8652]	no	no	no	no
ENSG00000090238	1421.1	0.323191	0.237275	1.36209	0.173169	0.376778	16	YPEL3	30092314	30096915	yippee like 3 [Source:HGNC Symbol;Acc:HGNC:18327]	no	no	no	no
ENSG00000090263	776.528	-0.0470484	0.15848	-0.296873	0.766564	0.878477	7	MRPS33	141002610	141015228	mitochondrial ribosomal protein S33 [Source:HGNC Symbol;Acc:HGNC:16634]	no	no	no	no
ENSG00000090266	1343.37	-0.0199508	0.112616	-0.177157	0.859385	0.92855	7	NDUFB2	140690777	140722790	NADH:ubiquinone oxidoreductase subunit B2 [Source:HGNC Symbol;Acc:HGNC:7697]	no	no	no	no
ENSG00000090273	3557.19	-0.0834963	0.157641	-0.52966	0.596347	0.774088	1	NUDC	26900238	26946871	nuclear distribution C, dynein complex regulator [Source:HGNC Symbol;Acc:HGNC:8045]	no	no	no	no
ENSG00000090316	2593.77	-0.103054	0.109204	-0.943691	0.345328	0.577373	4	MAEA	1289887	1340147	macrophage erythroblast attacher, E3 ubiquitin ligase [Source:HGNC Symbol;Acc:HGNC:13731]	no	no	no	no
ENSG00000090339	278.396	0.776043	0.284198	2.73064	0.0063212	0.0329573	19	ICAM1	10271093	10286615	intercellular adhesion molecule 1 [Source:HGNC Symbol;Acc:HGNC:5344]	no	no	no	no
ENSG00000090372	3204.51	0.053246	0.125411	0.424571	0.671149	0.821701	19	STRN4	46719511	46746994	striatin 4 [Source:HGNC Symbol;Acc:HGNC:15721]	no	no	no	no
ENSG00000090376	469.674	-1.62052	0.275445	-5.88326	4.02252e-09	1.15922e-07	12	IRAK3	66189195	66254622	interleukin 1 receptor associated kinase 3 [Source:HGNC Symbol;Acc:HGNC:17020]	no	no	no	no
ENSG00000090432	1399.76	-0.215364	0.101177	-2.12859	0.0332883	0.11962	1	MUL1	20499448	20508151	mitochondrial E3 ubiquitin protein ligase 1 [Source:HGNC Symbol;Acc:HGNC:25762]	no	no	no	no
ENSG00000090447	204.364	-0.305253	0.145827	-2.09326	0.0363263	0.128296	16	TFAP4	4257186	4273075	transcription factor AP-4 [Source:HGNC Symbol;Acc:HGNC:11745]	no	no	no	no
ENSG00000090470	941.142	-0.0819674	0.0855699	-0.957899	0.338114	0.569432	15	PDCD7	65117379	65133808	programmed cell death 7 [Source:HGNC Symbol;Acc:HGNC:8767]	no	no	no	no
ENSG00000090487	2826.07	-0.03498	0.185075	-0.189004	0.850089	0.924093	15	SPG21	64963022	64990310	SPG21 abhydrolase domain containing, maspardin [Source:HGNC Symbol;Acc:HGNC:20373]	no	no	no	no
ENSG00000090520	2184.55	0.0739072	0.140009	0.527876	0.597586	0.774779	3	DNAJB11	186567403	186585800	DnaJ heat shock protein family (Hsp40) member B11 [Source:HGNC Symbol;Acc:HGNC:14889]	no	no	no	no
ENSG00000090530	869.55	0.584723	0.283445	2.06292	0.0391204	0.134762	3	P3H2	189956728	190122437	prolyl 3-hydroxylase 2 [Source:HGNC Symbol;Acc:HGNC:19317]	no	no	no	no
ENSG00000090539	82.9839	1.17269	0.262101	4.47419	7.6702e-06	0.000106783	3	CHRD	184380054	184390736	chordin [Source:HGNC Symbol;Acc:HGNC:1949]	no	no	no	no
ENSG00000090565	2013.86	-0.252704	0.186716	-1.35342	0.175922	0.380787	16	RAB11FIP3	425649	523011	RAB11 family interacting protein 3 [Source:HGNC Symbol;Acc:HGNC:17224]	no	no	no	no
ENSG00000090581	2122.38	-0.504031	0.219644	-2.29477	0.0217465	0.0860581	16	GNPTG	1351931	1365737	N-acetylglucosamine-1-phosphate transferase subunit gamma [Source:HGNC Symbol;Acc:HGNC:23026]	no	no	no	no
ENSG00000090612	746.773	-0.3413	0.099129	-3.44299	0.000575312	0.00462003	12	ZNF268	133181409	133214832	zinc finger protein 268 [Source:HGNC Symbol;Acc:HGNC:13061]	no	no	no	no
ENSG00000090615	7365.08	0.07758	0.124291	0.624182	0.532508	0.730567	12	GOLGA3	132768902	132829143	golgin A3 [Source:HGNC Symbol;Acc:HGNC:4426]	no	no	no	no
ENSG00000090621	7157.8	-0.0382384	0.129597	-0.295055	0.767952	0.878888	1	PABPC4	39560709	39576790	poly(A) binding protein cytoplasmic 4 [Source:HGNC Symbol;Acc:HGNC:8557]	no	no	no	no
ENSG00000090674	873.217	-0.946627	0.241547	-3.91902	8.89085e-05	0.000930044	19	MCOLN1	7522624	7534009	mucolipin TRP cation channel 1 [Source:HGNC Symbol;Acc:HGNC:13356]	no	no	no	no
ENSG00000090686	3587.84	0.0413328	0.129128	0.320091	0.748899	0.86937	1	USP48	21678298	21783606	ubiquitin specific peptidase 48 [Source:HGNC Symbol;Acc:HGNC:18533]	no	no	no	no
ENSG00000090776	976.566	-0.212652	0.200757	-1.05925	0.289486	0.519571	X	EFNB1	68829021	68842160	ephrin B1 [Source:HGNC Symbol;Acc:HGNC:3226]	no	no	no	yes
ENSG00000090857	1834.02	0.348246	0.185462	1.87772	0.0604196	0.185291	16	PDPR	70114332	70162537	pyruvate dehydrogenase phosphatase regulatory subunit [Source:HGNC Symbol;Acc:HGNC:30264]	no	no	no	no
ENSG00000090861	9923.19	0.210026	0.171609	1.22386	0.221004	0.441288	16	AARS1	70251983	70289707	alanyl-tRNA synthetase 1 [Source:HGNC Symbol;Acc:HGNC:20]	no	no	no	no
ENSG00000090863	18265	-0.077144	0.10839	-0.711724	0.476636	0.688904	16	GLG1	74447427	74607144	golgi glycoprotein 1 [Source:HGNC Symbol;Acc:HGNC:4316]	no	no	no	no
ENSG00000090889	1127.94	-0.0993599	0.260978	-0.380721	0.703411	0.841729	X	KIF4A	70290104	70420886	kinesin family member 4A [Source:HGNC Symbol;Acc:HGNC:13339]	no	no	no	yes
ENSG00000090905	3700.61	0.10435	0.0909969	1.14674	0.251489	0.477593	16	TNRC6A	24610209	24827632	trinucleotide repeat containing adaptor 6A [Source:HGNC Symbol;Acc:HGNC:11969]	no	no	no	no
ENSG00000090924	5542.63	-0.0530852	0.227833	-0.233	0.815761	0.903998	19	PLEKHG2	39412669	39428415	pleckstrin homology and RhoGEF domain containing G2 [Source:HGNC Symbol;Acc:HGNC:29515]	no	no	no	no
ENSG00000090971	671.63	0.503817	0.146913	3.42936	0.000605016	0.00483206	19	NAT14	55485188	55487568	N-acetyltransferase 14 (putative) [Source:HGNC Symbol;Acc:HGNC:28918]	no	no	no	no
ENSG00000090975	804.708	-0.332247	0.159784	-2.07935	0.0375856	0.131545	12	PITPNM2	122983480	123151090	phosphatidylinositol transfer protein membrane associated 2 [Source:HGNC Symbol;Acc:HGNC:21044]	no	no	no	no
ENSG00000090989	1868.72	-0.108304	0.127052	-0.852435	0.393973	0.621466	4	EXOC1	55853648	55905086	exocyst complex component 1 [Source:HGNC Symbol;Acc:HGNC:30380]	no	no	no	no
ENSG00000091009	593.073	-0.260721	0.148719	-1.75311	0.0795823	0.225543	5	RBM27	146203605	146289223	RNA binding motif protein 27 [Source:HGNC Symbol;Acc:HGNC:29243]	no	no	no	no
ENSG00000091039	6169.06	-0.293001	0.169624	-1.72736	0.0841025	0.234146	12	OSBPL8	76351797	76559809	oxysterol binding protein like 8 [Source:HGNC Symbol;Acc:HGNC:16396]	no	no	no	no
ENSG00000091073	442.331	-0.464354	0.20834	-2.22883	0.0258251	0.0981013	7	DTX2	76461676	76505995	deltex E3 ubiquitin ligase 2 [Source:HGNC Symbol;Acc:HGNC:15973]	no	no	no	no
ENSG00000091127	882.827	0.38207	0.101194	3.77561	0.000159619	0.00155142	7	PUS7	105439661	105522271	pseudouridine synthase 7 [Source:HGNC Symbol;Acc:HGNC:26033]	no	no	no	no
ENSG00000091136	24589.9	0.0451658	0.158733	0.284539	0.775997	0.88308	7	LAMB1	107923799	108003213	laminin subunit beta 1 [Source:HGNC Symbol;Acc:HGNC:6486]	no	no	no	no
ENSG00000091140	3111.26	-0.260113	0.189408	-1.37329	0.169661	0.371107	7	DLD	107891162	107931730	dihydrolipoamide dehydrogenase [Source:HGNC Symbol;Acc:HGNC:2898]	no	no	no	no
ENSG00000091157	866.706	-0.188116	0.112093	-1.67822	0.0933042	0.250268	18	WDR7	56651343	57029811	WD repeat domain 7 [Source:HGNC Symbol;Acc:HGNC:13490]	no	no	no	no
ENSG00000091164	2447.93	-0.0245357	0.192829	-0.127241	0.89875	0.951713	18	TXNL1	56597209	56651600	thioredoxin like 1 [Source:HGNC Symbol;Acc:HGNC:12436]	no	no	no	no
ENSG00000091317	4812.77	-0.272895	0.152632	-1.78793	0.0737875	0.213438	3	CMTM6	32481312	32502852	CKLF like MARVEL transmembrane domain containing 6 [Source:HGNC Symbol;Acc:HGNC:19177]	no	no	no	no
ENSG00000091409	2601.47	-1.19513	0.271849	-4.39628	1.10119e-05	0.000147686	2	ITGA6	172427354	172506459	integrin subunit alpha 6 [Source:HGNC Symbol;Acc:HGNC:6142]	no	no	no	no
ENSG00000091436	6147.91	-0.0548602	0.111464	-0.492177	0.622594	0.791256	2	MAP3K20	173075435	173268015	mitogen-activated protein kinase kinase kinase 20 [Source:HGNC Symbol;Acc:HGNC:17797]	no	no	no	no
ENSG00000091483	2405.15	-0.292882	0.1466	-1.99783	0.0457356	0.15158	1	FH	241497511	241519799	fumarate hydratase [Source:HGNC Symbol;Acc:HGNC:3700]	no	no	no	no
ENSG00000091490	3359.24	-0.534402	0.154327	-3.46279	0.00053461	0.00434537	4	SEL1L3	25747433	25863760	SEL1L family member 3 [Source:HGNC Symbol;Acc:HGNC:29108]	no	no	no	no
ENSG00000091527	9774.44	-0.227922	0.142786	-1.59626	0.110432	0.279851	3	CDV3	133573686	133590261	CDV3 homolog [Source:HGNC Symbol;Acc:HGNC:26928]	no	no	no	no
ENSG00000091542	3531.47	0.353484	0.132727	2.66325	0.00773909	0.0390363	17	ALKBH5	18183078	18209954	alkB homolog 5, RNA demethylase [Source:HGNC Symbol;Acc:HGNC:25996]	no	no	no	no
ENSG00000091592	2555.36	-0.09112	0.116465	-0.782382	0.43399	0.655953	17	NLRP1	5499415	5619424	NLR family pyrin domain containing 1 [Source:HGNC Symbol;Acc:HGNC:14374]	no	no	no	no
ENSG00000091622	776.334	2.55646	0.368824	6.93137	4.1678e-12	2.03296e-10	17	PITPNM3	6451263	6556555	PITPNM family member 3 [Source:HGNC Symbol;Acc:HGNC:21043]	no	no	no	no
ENSG00000091640	2281.05	0.283055	0.148198	1.90998	0.0561356	0.175524	17	SPAG7	4959226	4967817	sperm associated antigen 7 [Source:HGNC Symbol;Acc:HGNC:11216]	no	no	no	no
ENSG00000091651	522.28	-0.223954	0.248608	-0.900832	0.367678	0.598334	16	ORC6	46689643	46698394	origin recognition complex subunit 6 [Source:HGNC Symbol;Acc:HGNC:17151]	no	no	no	no
ENSG00000091656	1362.34	0.0619325	0.292785	0.211528	0.832475	0.913109	8	ZFHX4	76681239	76867281	zinc finger homeobox 4 [Source:HGNC Symbol;Acc:HGNC:30939]	no	no	no	no
ENSG00000091732	650.76	-0.0886181	0.149952	-0.590976	0.554537	0.746784	7	ZC3HC1	130018287	130051451	zinc finger C3HC-type containing 1 [Source:HGNC Symbol;Acc:HGNC:29913]	no	no	no	no
ENSG00000091831	42.8891	0.0439377	0.414118	0.1061	0.915503	0.959967	6	ESR1	151656691	152129619	estrogen receptor 1 [Source:HGNC Symbol;Acc:HGNC:3467]	no	no	no	no
ENSG00000091947	713.533	0.0509671	0.0911523	0.559142	0.576065	0.761113	17	TMEM101	44011188	44023946	transmembrane protein 101 [Source:HGNC Symbol;Acc:HGNC:28653]	no	no	no	no
ENSG00000091986	111337	0.26989	0.207285	1.30202	0.192908	0.404489	3	CCDC80	112596797	112649530	coiled-coil domain containing 80 [Source:HGNC Symbol;Acc:HGNC:30649]	no	no	no	no
ENSG00000092010	2333.12	0.146364	0.125941	1.16216	0.245169	0.470787	14	PSME1	24136163	24138967	proteasome activator subunit 1 [Source:HGNC Symbol;Acc:HGNC:9568]	no	no	no	no
ENSG00000092020	721.48	-0.0341675	0.220204	-0.155163	0.876693	0.938856	14	PPP2R3C	35085467	35122517	protein phosphatase 2 regulatory subunit B''gamma [Source:HGNC Symbol;Acc:HGNC:17485]	no	no	no	no
ENSG00000092036	265.458	0.114091	0.177208	0.643824	0.51969	0.721644	14	HAUS4	22946228	22957161	HAUS augmin like complex subunit 4 [Source:HGNC Symbol;Acc:HGNC:20163]	no	no	no	no
ENSG00000092068	1866.65	-1.39446	0.42993	-3.24347	0.00118083	0.00840797	14	SLC7A8	23125295	23183674	solute carrier family 7 member 8 [Source:HGNC Symbol;Acc:HGNC:11066]	no	no	no	no
ENSG00000092094	1030.43	-0.0191484	0.108814	-0.175974	0.860314	0.929173	14	OSGEP	20446401	20455089	O-sialoglycoprotein endopeptidase [Source:HGNC Symbol;Acc:HGNC:18028]	no	no	no	no
ENSG00000092096	1112.53	0.314114	0.144374	2.1757	0.0295781	0.109055	14	SLC22A17	23346314	23352912	solute carrier family 22 member 17 [Source:HGNC Symbol;Acc:HGNC:23095]	no	no	no	no
ENSG00000092108	3226.29	-0.174666	0.14339	-1.21812	0.223178	0.443795	14	SCFD1	30622291	30737694	sec1 family domain containing 1 [Source:HGNC Symbol;Acc:HGNC:20726]	no	no	no	no
ENSG00000092140	1148.17	-0.115921	0.177047	-0.654747	0.512631	0.716545	14	G2E3	30559158	30620064	G2/M-phase specific E3 ubiquitin protein ligase [Source:HGNC Symbol;Acc:HGNC:20338]	no	no	no	no
ENSG00000092148	7294.94	-0.133775	0.126785	-1.05513	0.291364	0.521509	14	HECTD1	31100117	31207804	HECT domain E3 ubiquitin protein ligase 1 [Source:HGNC Symbol;Acc:HGNC:20157]	no	no	no	no
ENSG00000092199	15549.3	0.0730283	0.170473	0.428386	0.66837	0.819871	14	HNRNPC	21209136	21269494	heterogeneous nuclear ribonucleoprotein C [Source:HGNC Symbol;Acc:HGNC:5035]	no	no	no	no
ENSG00000092201	6357.34	-0.228609	0.169553	-1.3483	0.177562	0.383359	14	SUPT16H	21351476	21384019	SPT16 homolog, facilitates chromatin remodeling subunit [Source:HGNC Symbol;Acc:HGNC:11465]	no	no	no	no
ENSG00000092203	3162.08	0.00461587	0.118764	0.0388657	0.968997	0.985932	14	TOX4	21476597	21499175	TOX high mobility group box family member 4 [Source:HGNC Symbol;Acc:HGNC:20161]	no	no	no	no
ENSG00000092208	258.232	-0.153432	0.168963	-0.908081	0.363835	0.5948	14	GEMIN2	39114285	39136973	gem nuclear organelle associated protein 2 [Source:HGNC Symbol;Acc:HGNC:10884]	no	no	no	no
ENSG00000092330	1331.13	0.0588833	0.120431	0.488937	0.624886	0.793	14	TINF2	24238286	24242663	TERF1 interacting nuclear factor 2 [Source:HGNC Symbol;Acc:HGNC:11824]	no	no	no	no
ENSG00000092439	3503.38	-0.396128	0.1239	-3.19715	0.00138793	0.00967146	15	TRPM7	50552473	50686797	transient receptor potential cation channel subfamily M member 7 [Source:HGNC Symbol;Acc:HGNC:17994]	no	no	no	no
ENSG00000092445	1078.94	-0.429395	0.249102	-1.72377	0.0847497	0.235431	15	TYRO3	41557675	41583589	TYRO3 protein tyrosine kinase [Source:HGNC Symbol;Acc:HGNC:12446]	no	no	no	no
ENSG00000092470	656.333	-0.720843	0.219773	-3.27994	0.00103829	0.00755486	15	WDR76	43826980	43868412	WD repeat domain 76 [Source:HGNC Symbol;Acc:HGNC:25773]	no	no	no	no
ENSG00000092529	108.304	-0.182776	0.230418	-0.793238	0.427639	0.650949	15	CAPN3	42359498	42412949	calpain 3 [Source:HGNC Symbol;Acc:HGNC:1480]	no	no	no	no
ENSG00000092531	730.429	0.157021	0.149899	1.04751	0.294865	0.524952	15	SNAP23	42491233	42545356	synaptosome associated protein 23 [Source:HGNC Symbol;Acc:HGNC:11131]	no	no	no	no
ENSG00000092607	2574.27	0.149724	0.119837	1.2494	0.211518	0.429542	1	TBX15	118883046	118989556	T-box transcription factor 15 [Source:HGNC Symbol;Acc:HGNC:11594]	no	no	no	no
ENSG00000092621	7396.85	0.446034	0.268929	1.65855	0.0972055	0.25743	1	PHGDH	119648411	119744218	phosphoglycerate dehydrogenase [Source:HGNC Symbol;Acc:HGNC:8923]	no	no	no	no
ENSG00000092820	7718.25	0.467686	0.168035	2.78327	0.00538146	0.0291302	6	EZR	158765741	158819368	ezrin [Source:HGNC Symbol;Acc:HGNC:12691]	no	no	no	no
ENSG00000092841	41156	-0.0833761	0.162489	-0.513119	0.607868	0.781838	12	MYL6	56158346	56163496	myosin light chain 6 [Source:HGNC Symbol;Acc:HGNC:7587]	no	no	no	no
ENSG00000092847	1630.73	0.0720688	0.0809378	0.890421	0.37324	0.602841	1	AGO1	35869808	35930532	argonaute RISC component 1 [Source:HGNC Symbol;Acc:HGNC:3262]	no	no	no	no
ENSG00000092853	814.837	-0.599698	0.250304	-2.39588	0.0165805	0.0701014	1	CLSPN	35720218	35769978	claspin [Source:HGNC Symbol;Acc:HGNC:19715]	no	no	no	no
ENSG00000092871	220.022	-0.297913	0.167023	-1.78367	0.0744778	0.215056	17	RFFL	35005990	35089319	ring finger and FYVE like domain containing E3 ubiquitin protein ligase [Source:HGNC Symbol;Acc:HGNC:24821]	no	no	no	no
ENSG00000092931	815.38	-0.39566	0.0616994	-6.4127	1.42966e-10	5.48941e-09	17	MFSD11	76735865	76781449	major facilitator superfamily domain containing 11 [Source:HGNC Symbol;Acc:HGNC:25458]	no	no	no	no
ENSG00000092964	6106.07	0.122046	0.123788	0.985927	0.324169	0.556551	8	DPYSL2	26514031	26658178	dihydropyrimidinase like 2 [Source:HGNC Symbol;Acc:HGNC:3014]	no	no	no	no
ENSG00000092969	453.953	1.37504	0.607295	2.26421	0.0235614	0.0914811	1	TGFB2	218345336	218444619	transforming growth factor beta 2 [Source:HGNC Symbol;Acc:HGNC:11768]	no	no	no	no
ENSG00000092978	615.689	-0.0735162	0.125285	-0.586791	0.557344	0.747971	1	GPATCH2	217426992	217631090	G-patch domain containing 2 [Source:HGNC Symbol;Acc:HGNC:25499]	no	no	no	no
ENSG00000093000	3029.68	-0.296462	0.184786	-1.60436	0.108635	0.277014	22	NUP50	45163925	45188017	nucleoporin 50 [Source:HGNC Symbol;Acc:HGNC:8065]	no	no	no	no
ENSG00000093009	398.077	-0.694029	0.292054	-2.37637	0.017484	0.0730302	22	CDC45	19479457	19520612	cell division cycle 45 [Source:HGNC Symbol;Acc:HGNC:1739]	no	no	no	no
ENSG00000093010	4610.62	-0.195438	0.157929	-1.23751	0.215899	0.435118	22	COMT	19941371	19969975	catechol-O-methyltransferase [Source:HGNC Symbol;Acc:HGNC:2228]	no	no	no	no
ENSG00000093072	181.697	-1.76471	0.188584	-9.35769	8.14975e-21	1.34165e-18	22	ADA2	17178790	17258235	adenosine deaminase 2 [Source:HGNC Symbol;Acc:HGNC:1839]	no	no	no	no
ENSG00000093144	2250.23	-0.26421	0.10519	-2.51175	0.0120136	0.0549371	6	ECHDC1	127288712	127343609	ethylmalonyl-CoA decarboxylase 1 [Source:HGNC Symbol;Acc:HGNC:21489]	no	no	no	no
ENSG00000093167	4850.09	-0.216945	0.160199	-1.35422	0.175667	0.380542	3	LRRFIP2	37052626	37183689	LRR binding FLII interacting protein 2 [Source:HGNC Symbol;Acc:HGNC:6703]	no	no	no	no
ENSG00000093183	2622.67	-0.281907	0.113687	-2.47967	0.0131505	0.0586296	3	SEC22C	42547969	42601080	SEC22 homolog C, vesicle trafficking protein [Source:HGNC Symbol;Acc:HGNC:16828]	no	no	no	no
ENSG00000093217	356.756	-0.766542	0.18901	-4.05557	5.00118e-05	0.000557633	3	XYLB	38346760	38421348	xylulokinase [Source:HGNC Symbol;Acc:HGNC:12839]	no	no	no	no
ENSG00000094631	1985.28	0.239091	0.147537	1.62055	0.105115	0.271593	X	HDAC6	48801377	48824982	histone deacetylase 6 [Source:HGNC Symbol;Acc:HGNC:14064]	no	no	no	yes
ENSG00000094804	709.605	-0.757363	0.247989	-3.05402	0.00225794	0.0144495	17	CDC6	40287879	40304657	cell division cycle 6 [Source:HGNC Symbol;Acc:HGNC:1744]	no	no	no	no
ENSG00000094841	401.532	0.0414909	0.0998143	0.415681	0.677643	0.826196	X	UPRT	75156388	75304885	uracil phosphoribosyltransferase homolog [Source:HGNC Symbol;Acc:HGNC:28334]	no	no	no	yes
ENSG00000094880	1658.46	-0.133525	0.17473	-0.764181	0.444759	0.664565	5	CDC23	138187650	138213343	cell division cycle 23 [Source:HGNC Symbol;Acc:HGNC:1724]	no	no	no	no
ENSG00000094914	1730.89	0.137083	0.112226	1.22149	0.221901	0.442257	12	AAAS	53307456	53324864	aladin WD repeat nucleoporin [Source:HGNC Symbol;Acc:HGNC:13666]	no	no	no	no
ENSG00000094916	5277.08	-0.0327756	0.184599	-0.17755	0.859076	0.92855	12	CBX5	54230942	54280133	chromobox 5 [Source:HGNC Symbol;Acc:HGNC:1555]	no	no	no	no
ENSG00000094975	2173.25	0.160495	0.173528	0.924894	0.355021	0.586653	1	SUCO	172532349	172611833	SUN domain containing ossification factor [Source:HGNC Symbol;Acc:HGNC:1240]	no	no	no	no
ENSG00000095002	1254.99	-0.0722362	0.189591	-0.381011	0.703195	0.841687	2	MSH2	47403067	47663146	mutS homolog 2 [Source:HGNC Symbol;Acc:HGNC:7325]	no	no	no	no
ENSG00000095015	354.803	0.0456884	0.167591	0.272619	0.785146	0.887556	5	MAP3K1	56815549	56896152	mitogen-activated protein kinase kinase kinase 1 [Source:HGNC Symbol;Acc:HGNC:6848]	no	no	no	no
ENSG00000095059	109.97	0.175217	0.154201	1.13629	0.255835	0.482507	19	DHPS	12675717	12681880	deoxyhypusine synthase [Source:HGNC Symbol;Acc:HGNC:2869]	no	no	no	no
ENSG00000095066	759.557	0.208512	0.185867	1.12184	0.261932	0.489311	19	HOOK2	12763003	12872740	hook microtubule tethering protein 2 [Source:HGNC Symbol;Acc:HGNC:19885]	no	no	no	no
ENSG00000095139	15121.4	-0.00427176	0.109533	-0.0389997	0.968891	0.985932	11	ARCN1	118572390	118603033	archain 1 [Source:HGNC Symbol;Acc:HGNC:649]	no	no	no	no
ENSG00000095203	82.1896	-1.64783	0.302144	-5.45379	4.93061e-08	1.11959e-06	9	EPB41L4B	109171974	109321059	erythrocyte membrane protein band 4.1 like 4B [Source:HGNC Symbol;Acc:HGNC:19818]	no	no	no	no
ENSG00000095209	289.441	-0.951453	0.18617	-5.11068	3.21004e-07	6.30989e-06	9	TMEM38B	105694541	105776629	transmembrane protein 38B [Source:HGNC Symbol;Acc:HGNC:25535]	no	no	no	no
ENSG00000095261	2495.87	-0.27995	0.107866	-2.59534	0.0094498	0.0457551	9	PSMD5	120815496	120842951	proteasome 26S subunit, non-ATPase 5 [Source:HGNC Symbol;Acc:HGNC:9563]	no	no	no	no
ENSG00000095303	1512.89	-0.290374	0.517294	-0.561332	0.574571	0.760513	9	PTGS1	122370530	122395703	prostaglandin-endoperoxide synthase 1 [Source:HGNC Symbol;Acc:HGNC:9604]	no	no	no	no
ENSG00000095319	3253.97	-0.366257	0.194097	-1.88698	0.0591629	0.182477	9	NUP188	128947699	129007096	nucleoporin 188 [Source:HGNC Symbol;Acc:HGNC:17859]	no	no	no	no
ENSG00000095321	2248.51	-0.0762544	0.134874	-0.565376	0.571818	0.758775	9	CRAT	129094142	129111189	carnitine O-acetyltransferase [Source:HGNC Symbol;Acc:HGNC:2342]	no	no	no	no
ENSG00000095380	1242.46	0.0177481	0.0926	0.191665	0.848005	0.923162	9	NANS	98056732	98083077	N-acetylneuraminate synthase [Source:HGNC Symbol;Acc:HGNC:19237]	no	no	no	no
ENSG00000095383	1247.5	-0.675831	0.107657	-6.27763	3.43782e-10	1.22368e-08	9	TBC1D2	98199011	98255649	TBC1 domain family member 2 [Source:HGNC Symbol;Acc:HGNC:18026]	no	no	no	no
ENSG00000095397	270.185	0.934226	0.286812	3.25728	0.00112484	0.00807751	9	WHRN	114402080	114505473	whirlin [Source:HGNC Symbol;Acc:HGNC:16361]	no	no	no	no
ENSG00000095485	715.536	0.0384859	0.179128	0.214851	0.829884	0.911935	10	CWF19L1	100232298	100267680	CWF19 like cell cycle control factor 1 [Source:HGNC Symbol;Acc:HGNC:25613]	no	no	no	no
ENSG00000095539	164.654	0.382958	0.212699	1.80047	0.0717859	0.209344	10	SEMA4G	100969504	100985871	semaphorin 4G [Source:HGNC Symbol;Acc:HGNC:10735]	no	no	no	no
ENSG00000095564	2750.34	-0.22222	0.096427	-2.30454	0.0211925	0.0844495	10	BTAF1	91923770	92031437	B-TFIID TATA-box binding protein associated factor 1 [Source:HGNC Symbol;Acc:HGNC:17307]	no	no	no	no
ENSG00000095574	680.405	-0.162606	0.153376	-1.06018	0.289063	0.519154	10	IKZF5	122990807	123008812	IKAROS family zinc finger 5 [Source:HGNC Symbol;Acc:HGNC:14283]	no	no	no	no
ENSG00000095637	43.8178	-1.10885	0.27743	-3.99686	6.41887e-05	0.000700966	10	SORBS1	95311771	95561414	sorbin and SH3 domain containing 1 [Source:HGNC Symbol;Acc:HGNC:14565]	no	no	no	no
ENSG00000095739	381.847	-1.09694	0.158275	-6.93057	4.19144e-12	2.03695e-10	10	BAMBI	28677510	28682932	BMP and activin membrane bound inhibitor [Source:HGNC Symbol;Acc:HGNC:30251]	no	no	no	no
ENSG00000095752	641.573	1.27253	0.180014	7.06905	1.55997e-12	8.25093e-11	19	IL11	55364382	55370463	interleukin 11 [Source:HGNC Symbol;Acc:HGNC:5966]	no	no	no	no
ENSG00000095787	5389.61	-0.00784706	0.184719	-0.042481	0.966115	0.984902	10	WAC	28532493	28623112	WW domain containing adaptor with coiled-coil [Source:HGNC Symbol;Acc:HGNC:17327]	no	no	no	no
ENSG00000095794	426.213	0.168931	0.128427	1.31538	0.188381	0.397975	10	CREM	35126791	35212958	cAMP responsive element modulator [Source:HGNC Symbol;Acc:HGNC:2352]	no	no	no	no
ENSG00000095906	983.042	-0.0887678	0.16637	-0.533556	0.593648	0.772534	16	NUBP2	1782932	1789186	NUBP iron-sulfur cluster assembly factor 2, cytosolic [Source:HGNC Symbol;Acc:HGNC:8042]	no	no	no	no
ENSG00000095951	1263.34	0.0580256	0.183719	0.315839	0.752124	0.870888	6	HIVEP1	12008762	12164999	HIVEP zinc finger 1 [Source:HGNC Symbol;Acc:HGNC:4920]	no	no	no	no
ENSG00000096060	482.827	-1.26694	0.303274	-4.17755	2.94661e-05	0.000345257	6	FKBP5	35573585	35728583	FKBP prolyl isomerase 5 [Source:HGNC Symbol;Acc:HGNC:3721]	no	no	no	no
ENSG00000096063	1353.63	-0.200684	0.176394	-1.1377	0.255246	0.481808	6	SRPK1	35832966	35921342	SRSF protein kinase 1 [Source:HGNC Symbol;Acc:HGNC:11305]	no	no	no	no
ENSG00000096070	2113.28	-0.0766036	0.110557	-0.692889	0.488379	0.698187	6	BRPF3	36196744	36232790	bromodomain and PHD finger containing 3 [Source:HGNC Symbol;Acc:HGNC:14256]	no	no	no	no
ENSG00000096080	431.735	0.175061	0.193307	0.905612	0.365141	0.595914	6	MRPS18A	43671202	43687791	mitochondrial ribosomal protein S18A [Source:HGNC Symbol;Acc:HGNC:14515]	no	no	no	no
ENSG00000096092	847.579	-0.113539	0.147377	-0.770399	0.441063	0.661218	6	TMEM14A	52671113	52686588	transmembrane protein 14A [Source:HGNC Symbol;Acc:HGNC:21076]	no	no	no	no
ENSG00000096093	888.689	0.191994	0.18618	1.03123	0.302434	0.532548	6	EFHC1	52362123	52529886	EF-hand domain containing 1 [Source:HGNC Symbol;Acc:HGNC:16406]	no	no	no	no
ENSG00000096384	37427.3	-0.112793	0.179493	-0.628399	0.529743	0.728505	6	HSP90AB1	44246166	44253888	heat shock protein 90 alpha family class B member 1 [Source:HGNC Symbol;Acc:HGNC:5258]	no	no	no	no
ENSG00000096401	2575.67	-0.122386	0.178197	-0.6868	0.492208	0.701253	6	CDC5L	44387706	44450425	cell division cycle 5 like [Source:HGNC Symbol;Acc:HGNC:1743]	no	no	no	no
ENSG00000096433	3885.85	-1.12907	0.168527	-6.69962	2.08964e-11	9.2042e-10	6	ITPR3	33620365	33696574	inositol 1,4,5-trisphosphate receptor type 3 [Source:HGNC Symbol;Acc:HGNC:6182]	no	no	no	no
ENSG00000096654	261.458	-0.0754833	0.193147	-0.390807	0.69594	0.83734	6	ZNF184	27450743	27473118	zinc finger protein 184 [Source:HGNC Symbol;Acc:HGNC:12975]	no	no	no	no
ENSG00000096696	18998.9	0.457006	0.219328	2.08366	0.0371908	0.13051	6	DSP	7541617	7586714	desmoplakin [Source:HGNC Symbol;Acc:HGNC:3052]	no	no	no	no
ENSG00000096717	1392.49	0.16981	0.0986633	1.72111	0.085231	0.235983	10	SIRT1	67884656	67918390	sirtuin 1 [Source:HGNC Symbol;Acc:HGNC:14929]	no	no	no	no
ENSG00000096746	5841.31	0.22831	0.134823	1.6934	0.090379	0.244929	10	HNRNPH3	68331174	68343193	heterogeneous nuclear ribonucleoprotein H3 [Source:HGNC Symbol;Acc:HGNC:5043]	no	no	no	no
ENSG00000096872	516.405	-0.0367393	0.188416	-0.194991	0.8454	0.92166	9	IFT74	26947039	27066134	intraflagellar transport 74 [Source:HGNC Symbol;Acc:HGNC:21424]	no	no	no	no
ENSG00000096968	948.435	-0.0134016	0.226684	-0.0591201	0.952856	0.978387	9	JAK2	4984390	5129948	Janus kinase 2 [Source:HGNC Symbol;Acc:HGNC:6192]	no	no	no	no
ENSG00000097007	6687.4	0.377125	0.139061	2.71195	0.00668896	0.0345872	9	ABL1	130713043	130887675	ABL proto-oncogene 1, non-receptor tyrosine kinase [Source:HGNC Symbol;Acc:HGNC:76]	no	no	no	no
ENSG00000097021	1700.23	0.181195	0.202991	0.892626	0.372057	0.601807	1	ACOT7	6264269	6393767	acyl-CoA thioesterase 7 [Source:HGNC Symbol;Acc:HGNC:24157]	no	no	no	no
ENSG00000097033	6727.75	-0.0239216	0.135872	-0.176061	0.860246	0.929173	1	SH3GLB1	86704570	86748184	SH3 domain containing GRB2 like, endophilin B1 [Source:HGNC Symbol;Acc:HGNC:10833]	no	no	no	no
ENSG00000097046	427.658	-0.425679	0.19619	-2.16973	0.0300275	0.110403	1	CDC7	91500851	91525764	cell division cycle 7 [Source:HGNC Symbol;Acc:HGNC:1745]	no	no	no	no
ENSG00000097096	265.633	-0.149152	0.200995	-0.74207	0.458045	0.674922	1	SYDE2	85156889	85201724	synapse defective Rho GTPase homolog 2 [Source:HGNC Symbol;Acc:HGNC:25841]	no	no	no	no
ENSG00000099139	205.667	-0.100321	0.350408	-0.286298	0.77465	0.882309	9	PCSK5	75890644	76362975	proprotein convertase subtilisin/kexin type 5 [Source:HGNC Symbol;Acc:HGNC:8747]	no	no	no	no
ENSG00000099194	9433.78	0.687382	0.157423	4.36647	1.26268e-05	0.000166462	10	SCD	100347233	100364826	stearoyl-CoA desaturase [Source:HGNC Symbol;Acc:HGNC:10571]	no	no	no	no
ENSG00000099203	515.321	-0.154093	0.160577	-0.959625	0.337244	0.568339	19	TMED1	10832067	10836318	transmembrane p24 trafficking protein 1 [Source:HGNC Symbol;Acc:HGNC:17291]	no	no	no	no
ENSG00000099204	1186.66	2.53988	0.41392	6.13616	8.45374e-10	2.79738e-08	10	ABLIM1	114431112	114768061	actin binding LIM protein 1 [Source:HGNC Symbol;Acc:HGNC:78]	no	no	no	no
ENSG00000099219	572.091	-0.235598	0.166517	-1.41486	0.15711	0.354059	9	ERMP1	5749832	5879537	endoplasmic reticulum metallopeptidase 1 [Source:HGNC Symbol;Acc:HGNC:23703]	no	no	no	no
ENSG00000099246	3954.49	0.00665696	0.139834	0.0476063	0.96203	0.983258	10	RAB18	27504174	27543207	RAB18, member RAS oncogene family [Source:HGNC Symbol;Acc:HGNC:14244]	no	no	no	no
ENSG00000099250	14036.6	-0.352373	0.156824	-2.24694	0.0246439	0.0945965	10	NRP1	33177492	33336262	neuropilin 1 [Source:HGNC Symbol;Acc:HGNC:8004]	no	no	no	no
ENSG00000099256	751.676	-0.188535	0.167972	-1.12242	0.261684	0.489037	10	PRTFDC1	24848614	24952606	phosphoribosyl transferase domain containing 1 [Source:HGNC Symbol;Acc:HGNC:23333]	no	no	no	no
ENSG00000099260	202.621	1.96133	0.435033	4.50846	6.53008e-06	9.32767e-05	1	PALMD	99646113	99694541	palmdelphin [Source:HGNC Symbol;Acc:HGNC:15846]	no	no	no	no
ENSG00000099282	106.156	0.480609	0.914713	0.52542	0.599291	0.776183	10	TSPAN15	69451465	69507666	tetraspanin 15 [Source:HGNC Symbol;Acc:HGNC:23298]	no	no	no	no
ENSG00000099284	471.237	0.537643	0.189847	2.83198	0.00462603	0.0256958	10	MACROH2A2	70052544	70112282	macroH2A.2 histone [Source:HGNC Symbol;Acc:HGNC:14453]	no	no	no	no
ENSG00000099290	3362.75	-0.442517	0.183962	-2.40549	0.016151	0.0687709	10	WASHC2A	50067888	50133509	WASH complex subunit 2A [Source:HGNC Symbol;Acc:HGNC:23416]	no	no	no	no
ENSG00000099308	423.657	-0.538647	0.232124	-2.32051	0.0203133	0.0818373	19	MAST3	18097778	18151692	microtubule associated serine/threonine kinase 3 [Source:HGNC Symbol;Acc:HGNC:19036]	no	no	no	no
ENSG00000099326	806.362	0.092354	0.205461	0.449496	0.653074	0.811031	19	MZF1	58561931	58573575	myeloid zinc finger 1 [Source:HGNC Symbol;Acc:HGNC:13108]	no	no	no	no
ENSG00000099330	364.331	0.00979084	0.153708	0.0636975	0.949211	0.97744	19	OCEL1	17226213	17229219	occludin/ELL domain containing 1 [Source:HGNC Symbol;Acc:HGNC:26221]	no	no	no	no
ENSG00000099331	7961.12	-0.32285	0.14278	-2.26117	0.0237489	0.0921003	19	MYO9B	17075777	17214537	myosin IXB [Source:HGNC Symbol;Acc:HGNC:7609]	no	no	no	no
ENSG00000099337	1424.48	-1.03224	0.227711	-4.53312	5.81183e-06	8.41118e-05	19	KCNK6	38319845	38332076	potassium two pore domain channel subfamily K member 6 [Source:HGNC Symbol;Acc:HGNC:6281]	no	no	no	no
ENSG00000099341	5409.85	0.043623	0.150627	0.28961	0.772115	0.880945	19	PSMD8	38374563	38383850	proteasome 26S subunit, non-ATPase 8 [Source:HGNC Symbol;Acc:HGNC:9566]	no	no	no	no
ENSG00000099364	1003.94	0.233972	0.138473	1.68967	0.0910919	0.246126	16	FBXL19	30923055	30948783	F-box and leucine rich repeat protein 19 [Source:HGNC Symbol;Acc:HGNC:25300]	no	no	no	no
ENSG00000099365	443.103	1.11984	0.242591	4.61615	3.90922e-06	5.90418e-05	16	STX1B	30989256	31010638	syntaxin 1B [Source:HGNC Symbol;Acc:HGNC:18539]	no	no	no	no
ENSG00000099377	512.56	-0.314032	0.147894	-2.12337	0.033723	0.120928	16	HSD3B7	30985207	30989147	hydroxy-delta-5-steroid dehydrogenase, 3 beta- and steroid delta-isomerase 7 [Source:HGNC Symbol;Acc:HGNC:18324]	no	no	no	no
ENSG00000099381	1577.52	0.20508	0.0961129	2.13374	0.0328638	0.118515	16	SETD1A	30957754	30984664	SET domain containing 1A, histone lysine methyltransferase [Source:HGNC Symbol;Acc:HGNC:29010]	no	no	no	no
ENSG00000099385	1335.19	0.279449	0.121649	2.29716	0.0216094	0.0855928	16	BCL7C	30833626	30894302	BAF chromatin remodeling complex subunit BCL7C [Source:HGNC Symbol;Acc:HGNC:1006]	no	no	no	no
ENSG00000099622	7504.52	0.271848	0.126404	2.15062	0.0315064	0.114814	19	CIRBP	1259384	1274880	cold inducible RNA binding protein [Source:HGNC Symbol;Acc:HGNC:1982]	no	no	no	no
ENSG00000099624	1725.53	-0.0626006	0.15707	-0.398552	0.690223	0.833407	19	ATP5F1D	1241746	1244825	ATP synthase F1 subunit delta [Source:HGNC Symbol;Acc:HGNC:837]	no	no	no	no
ENSG00000099625	300.669	-0.308756	0.231076	-1.33616	0.181496	0.389289	19	CBARP	1228287	1238027	CACN subunit beta associated regulatory protein [Source:HGNC Symbol;Acc:HGNC:28617]	no	no	no	no
ENSG00000099725	2447.37	1.75128	0.196743	8.90138	5.51577e-19	7.05269e-17	Y	PRKY	7273972	7381548	protein kinase Y-linked (pseudogene) [Source:HGNC Symbol;Acc:HGNC:9444]	no	no	no	no
ENSG00000099783	7520.54	0.0406906	0.123576	0.329277	0.741946	0.865003	19	HNRNPM	8444767	8489114	heterogeneous nuclear ribonucleoprotein M [Source:HGNC Symbol;Acc:HGNC:5046]	no	no	no	no
ENSG00000099785	588.15	-0.0702038	0.202576	-0.346556	0.728925	0.857138	19	MARCHF2	8413270	8439017	membrane associated ring-CH-type finger 2 [Source:HGNC Symbol;Acc:HGNC:28038]	no	no	no	no
ENSG00000099795	1506.43	-0.236352	0.175286	-1.34838	0.177537	0.383359	19	NDUFB7	14566078	14572066	NADH:ubiquinone oxidoreductase subunit B7 [Source:HGNC Symbol;Acc:HGNC:7702]	no	no	no	no
ENSG00000099797	2028.76	-0.00232503	0.124787	-0.018632	0.985135	0.991899	19	TECR	14517085	14565980	trans-2,3-enoyl-CoA reductase [Source:HGNC Symbol;Acc:HGNC:4551]	no	no	no	no
ENSG00000099800	1591.19	-0.143379	0.14082	-1.01817	0.308599	0.539526	19	TIMM13	2425625	2427586	translocase of inner mitochondrial membrane 13 [Source:HGNC Symbol;Acc:HGNC:11816]	no	no	no	no
ENSG00000099804	1552.03	-0.00607714	0.17776	-0.0341873	0.972728	0.98764	19	CDC34	531760	542092	cell division cycle 34, ubiqiutin conjugating enzyme [Source:HGNC Symbol;Acc:HGNC:1734]	no	no	no	no
ENSG00000099810	1464.62	-0.427544	0.183605	-2.3286	0.01988	0.0806344	9	MTAP	21802636	21937651	methylthioadenosine phosphorylase [Source:HGNC Symbol;Acc:HGNC:7413]	no	no	no	no
ENSG00000099814	3905.95	-0.293854	0.172902	-1.69954	0.089218	0.242954	14	CEP170B	104865268	104896747	centrosomal protein 170B [Source:HGNC Symbol;Acc:HGNC:20362]	no	no	no	no
ENSG00000099817	4339.15	-0.0963657	0.123232	-0.781983	0.434224	0.656194	19	POLR2E	1086574	1095380	RNA polymerase II, I and III subunit E [Source:HGNC Symbol;Acc:HGNC:9192]	no	no	no	no
ENSG00000099821	1214.57	-0.119913	0.151203	-0.79306	0.427743	0.650993	19	POLRMT	617221	633537	RNA polymerase mitochondrial [Source:HGNC Symbol;Acc:HGNC:9200]	no	no	no	no
ENSG00000099822	168.452	-0.243173	0.228098	-1.06609	0.286383	0.516737	19	HCN2	589881	617159	hyperpolarization activated cyclic nucleotide gated potassium and sodium channel 2 [Source:HGNC Symbol;Acc:HGNC:4846]	no	no	no	no
ENSG00000099840	58.125	0.12384	0.228237	0.542593	0.58741	0.768318	19	IZUMO4	2096429	2099593	IZUMO family member 4 [Source:HGNC Symbol;Acc:HGNC:26950]	no	no	no	no
ENSG00000099849	91.4242	0.610744	0.198827	3.07174	0.00212817	0.0137527	11	RASSF7	560404	564025	Ras association domain family member 7 [Source:HGNC Symbol;Acc:HGNC:1166]	no	no	no	no
ENSG00000099860	3723.92	-9.02809e-05	0.180201	-0.000501002	0.9996	0.999752	19	GADD45B	2476122	2478259	growth arrest and DNA damage inducible beta [Source:HGNC Symbol;Acc:HGNC:4096]	no	no	no	no
ENSG00000099864	185.725	4.29002	0.622518	6.89139	5.52511e-12	2.64603e-10	19	PALM	708935	748329	paralemmin [Source:HGNC Symbol;Acc:HGNC:8594]	no	no	no	no
ENSG00000099875	2282.27	-0.107544	0.23154	-0.464475	0.642307	0.804794	19	MKNK2	2037465	2051244	MAPK interacting serine/threonine kinase 2 [Source:HGNC Symbol;Acc:HGNC:7111]	no	no	no	no
ENSG00000099889	283.924	-3.15263	0.27027	-11.6647	1.93073e-31	7.47873e-29	22	ARVCF	19969896	20016823	ARVCF delta catenin family member [Source:HGNC Symbol;Acc:HGNC:728]	no	no	no	no
ENSG00000099899	1226.77	-0.334576	0.189205	-1.76832	0.0770072	0.220331	22	TRMT2A	20111875	20117392	tRNA methyltransferase 2 homolog A [Source:HGNC Symbol;Acc:HGNC:24974]	no	no	no	no
ENSG00000099901	3007.43	-0.0386528	0.17713	-0.218217	0.82726	0.910345	22	RANBP1	20115938	20127355	RAN binding protein 1 [Source:HGNC Symbol;Acc:HGNC:9847]	no	no	no	no
ENSG00000099904	3026.06	-0.233481	0.145433	-1.60542	0.108402	0.276784	22	ZDHHC8	20129456	20148007	zinc finger DHHC-type palmitoyltransferase 8 [Source:HGNC Symbol;Acc:HGNC:18474]	no	no	no	no
ENSG00000099910	1028.93	-0.0223738	0.145207	-0.154082	0.877545	0.939386	22	KLHL22	20441519	20495844	kelch like family member 22 [Source:HGNC Symbol;Acc:HGNC:25888]	no	no	no	no
ENSG00000099917	4974.26	-0.157037	0.161461	-0.972599	0.330753	0.562066	22	MED15	20495913	20587632	mediator complex subunit 15 [Source:HGNC Symbol;Acc:HGNC:14248]	no	no	no	no
ENSG00000099940	1621.04	-0.133565	0.106863	-1.24987	0.211347	0.429345	22	SNAP29	20859007	20891214	synaptosome associated protein 29 [Source:HGNC Symbol;Acc:HGNC:11133]	no	no	no	no
ENSG00000099942	2941.09	-0.0152837	0.124251	-0.123007	0.902102	0.953321	22	CRKL	20917407	20953747	CRK like proto-oncogene, adaptor protein [Source:HGNC Symbol;Acc:HGNC:2363]	no	no	no	no
ENSG00000099949	925.511	-0.237911	0.149683	-1.58943	0.111964	0.2824	22	LZTR1	20982269	20999032	leucine zipper like transcription regulator 1 [Source:HGNC Symbol;Acc:HGNC:6742]	no	no	no	no
ENSG00000099953	659.625	-0.356376	0.331264	-1.07581	0.282014	0.512627	22	MMP11	23768226	23784316	matrix metallopeptidase 11 [Source:HGNC Symbol;Acc:HGNC:7157]	no	no	no	no
ENSG00000099956	3101.14	0.233795	0.174344	1.341	0.17992	0.387245	22	SMARCB1	23786931	23838009	SWI/SNF related, matrix associated, actin dependent regulator of chromatin, subfamily b, member 1 [Source:HGNC Symbol;Acc:HGNC:11103]	no	no	no	no
ENSG00000099957	71.6964	-0.0742389	0.242341	-0.306341	0.759345	0.874269	22	P2RX6	21009808	21028013	purinergic receptor P2X 6 [Source:HGNC Symbol;Acc:HGNC:8538]	no	no	no	no
ENSG00000099968	2344.92	-0.344392	0.136836	-2.51681	0.0118421	0.0542978	22	BCL2L13	17628855	17730855	BCL2 like 13 [Source:HGNC Symbol;Acc:HGNC:17164]	no	no	no	no
ENSG00000099991	3288.67	-0.0463521	0.11578	-0.400346	0.688902	0.832633	22	CABIN1	24011192	24178628	calcineurin binding protein 1 [Source:HGNC Symbol;Acc:HGNC:24187]	no	no	no	no
ENSG00000099992	593.802	0.249703	0.190809	1.30866	0.19065	0.401282	22	TBC1D10A	30291990	30326947	TBC1 domain family member 10A [Source:HGNC Symbol;Acc:HGNC:23609]	no	no	no	no
ENSG00000099995	4438.93	-0.142026	0.131922	-1.07659	0.281664	0.512222	22	SF3A1	30331988	30356919	splicing factor 3a subunit 1 [Source:HGNC Symbol;Acc:HGNC:10765]	no	no	no	no
ENSG00000099998	132.394	3.76167	0.590811	6.36695	1.92826e-10	7.17377e-09	22	GGT5	24219654	24245108	gamma-glutamyltransferase 5 [Source:HGNC Symbol;Acc:HGNC:4260]	no	no	no	no
ENSG00000099999	654.791	0.224914	0.189214	1.18867	0.234568	0.457397	22	RNF215	30368811	30421771	ring finger protein 215 [Source:HGNC Symbol;Acc:HGNC:33434]	no	no	no	no
ENSG00000100003	356.47	0.24544	0.155668	1.5767	0.114866	0.286892	22	SEC14L2	30396941	30425303	SEC14 like lipid binding 2 [Source:HGNC Symbol;Acc:HGNC:10699]	no	no	no	no
ENSG00000100014	1344.17	-0.0794668	0.0936178	-0.848843	0.395969	0.622824	22	SPECC1L	24270817	24417739	sperm antigen with calponin homology and coiled-coil domains 1 like [Source:HGNC Symbol;Acc:HGNC:29022]	no	no	no	no
ENSG00000100023	2032.85	-0.0489292	0.102361	-0.478004	0.632647	0.797688	22	PPIL2	21666000	21700015	peptidylprolyl isomerase like 2 [Source:HGNC Symbol;Acc:HGNC:9261]	no	no	no	no
ENSG00000100028	1008.79	-0.235453	0.141774	-1.66077	0.0967593	0.256595	22	SNRPD3	24555958	24582052	small nuclear ribonucleoprotein D3 polypeptide [Source:HGNC Symbol;Acc:HGNC:11160]	no	no	no	no
ENSG00000100029	3247.2	0.0652538	0.121721	0.536091	0.591895	0.770988	22	PES1	30576625	30607083	pescadillo ribosomal biogenesis factor 1 [Source:HGNC Symbol;Acc:HGNC:8848]	no	no	no	no
ENSG00000100030	7740.23	-0.360312	0.151662	-2.37575	0.0175133	0.0731293	22	MAPK1	21759657	21867680	mitogen-activated protein kinase 1 [Source:HGNC Symbol;Acc:HGNC:6871]	no	no	no	no
ENSG00000100034	2268.65	-0.453296	0.116851	-3.87927	0.00010477	0.00108052	22	PPM1F	21919425	21952848	protein phosphatase, Mg2+/Mn2+ dependent 1F [Source:HGNC Symbol;Acc:HGNC:19388]	no	no	no	no
ENSG00000100036	390.831	0.141052	0.118894	1.18637	0.235476	0.45838	22	SLC35E4	30635781	30669016	solute carrier family 35 member E4 [Source:HGNC Symbol;Acc:HGNC:17058]	no	no	no	no
ENSG00000100056	795.665	-0.416758	0.151083	-2.75847	0.0058073	0.0310021	22	ESS2	19130279	19144684	ess-2 splicing factor homolog [Source:HGNC Symbol;Acc:HGNC:16817]	no	no	no	no
ENSG00000100058	703.536	0.0403907	0.121188	0.333291	0.738915	0.863255	22	CRYBB2P1	25455712	25459681	crystallin beta B2 pseudogene 1 [Source:HGNC Symbol;Acc:HGNC:2399]	no	no	no	no
ENSG00000100065	320.232	1.53316	0.270883	5.65985	1.51504e-08	3.87437e-07	22	CARD10	37490362	37519542	caspase recruitment domain family member 10 [Source:HGNC Symbol;Acc:HGNC:16422]	no	no	no	no
ENSG00000100068	111.663	-0.319809	0.324704	-0.984926	0.32466	0.556959	22	LRP5L	25351612	25405274	LDL receptor related protein 5 like (pseudogene) [Source:HGNC Symbol;Acc:HGNC:25323]	no	no	no	no
ENSG00000100075	3000.99	-0.0504235	0.148853	-0.338747	0.7348	0.860957	22	SLC25A1	19175581	19178739	solute carrier family 25 member 1 [Source:HGNC Symbol;Acc:HGNC:10979]	no	no	no	no
ENSG00000100077	55.6818	1.48288	0.357422	4.14881	3.34208e-05	0.000387117	22	GRK3	25564675	25729294	G protein-coupled receptor kinase 3 [Source:HGNC Symbol;Acc:HGNC:290]	no	no	no	no
ENSG00000100083	1824.32	0.0712515	0.137723	0.517353	0.604909	0.779638	22	GGA1	37608725	37633564	golgi associated, gamma adaptin ear containing, ARF binding protein 1 [Source:HGNC Symbol;Acc:HGNC:17842]	no	no	no	no
ENSG00000100084	342.119	0.0539331	0.126639	0.425882	0.670193	0.821114	22	HIRA	19330698	19447450	histone cell cycle regulator [Source:HGNC Symbol;Acc:HGNC:4916]	no	no	no	no
ENSG00000100092	90.9024	0.51974	0.204238	2.54477	0.010935	0.0509782	22	SH3BP1	37634654	37656117	SH3 domain binding protein 1 [Source:HGNC Symbol;Acc:HGNC:10824]	no	no	no	no
ENSG00000100097	56518.8	-0.118202	0.108271	-1.09172	0.274956	0.504341	22	LGALS1	37675636	37679802	galectin 1 [Source:HGNC Symbol;Acc:HGNC:6561]	no	no	no	no
ENSG00000100099	1527.16	0.042913	0.119621	0.358742	0.719788	0.851278	22	HPS4	26443107	26483931	HPS4 biogenesis of lysosomal organelles complex 3 subunit 2 [Source:HGNC Symbol;Acc:HGNC:15844]	no	no	no	no
ENSG00000100100	414.208	-0.766094	0.237614	-3.22412	0.00126361	0.00890409	22	PIK3IP1	31281594	31292534	phosphoinositide-3-kinase interacting protein 1 [Source:HGNC Symbol;Acc:HGNC:24942]	no	no	no	no
ENSG00000100104	515.407	-0.131225	0.116271	-1.12861	0.259061	0.485809	22	SRRD	26483877	26494658	SRR1 domain containing [Source:HGNC Symbol;Acc:HGNC:33910]	no	no	no	no
ENSG00000100105	690.258	0.270985	0.167565	1.6172	0.105835	0.27264	22	PATZ1	31325804	31346346	POZ/BTB and AT hook containing zinc finger 1 [Source:HGNC Symbol;Acc:HGNC:13071]	no	no	no	no
ENSG00000100106	5028.73	-0.203722	0.0949365	-2.14588	0.0318825	0.115832	22	TRIOBP	37697048	37776556	TRIO and F-actin binding protein [Source:HGNC Symbol;Acc:HGNC:17009]	no	no	no	no
ENSG00000100109	1271.98	-0.227775	0.109649	-2.07732	0.0377718	0.131975	22	TFIP11	26491225	26512505	tuftelin interacting protein 11 [Source:HGNC Symbol;Acc:HGNC:17165]	no	no	no	no
ENSG00000100116	334.731	-0.223679	0.175064	-1.2777	0.201355	0.41676	22	GCAT	37807905	37817176	glycine C-acetyltransferase [Source:HGNC Symbol;Acc:HGNC:4188]	no	no	no	no
ENSG00000100124	848.735	-0.15479	0.0924057	-1.67512	0.093911	0.25123	22	ANKRD54	37830855	37849327	ankyrin repeat domain 54 [Source:HGNC Symbol;Acc:HGNC:25185]	no	no	no	no
ENSG00000100129	4925.23	-0.0795104	0.170772	-0.465594	0.641506	0.803943	22	EIF3L	37848868	37889407	eukaryotic translation initiation factor 3 subunit L [Source:HGNC Symbol;Acc:HGNC:18138]	no	no	no	no
ENSG00000100138	3024.78	-0.0796123	0.16408	-0.485205	0.627531	0.795033	22	SNU13	41673933	41690504	small nuclear ribonucleoprotein 13 [Source:HGNC Symbol;Acc:HGNC:7819]	no	no	no	no
ENSG00000100139	3915.74	-0.0898681	0.148846	-0.603764	0.546001	0.740625	22	MICALL1	37905657	37942822	MICAL like 1 [Source:HGNC Symbol;Acc:HGNC:29804]	no	no	no	no
ENSG00000100142	974.381	0.0961223	0.0802057	1.19845	0.230743	0.452821	22	POLR2F	37952607	38041915	RNA polymerase II, I and III subunit F [Source:HGNC Symbol;Acc:HGNC:9193]	no	no	no	no
ENSG00000100147	142.728	-0.136575	0.209652	-0.651437	0.514764	0.717672	22	CCDC134	41800679	41832164	coiled-coil domain containing 134 [Source:HGNC Symbol;Acc:HGNC:26185]	no	no	no	no
ENSG00000100150	315.576	-0.0416618	0.156989	-0.26538	0.790716	0.889759	22	DEPDC5	31753867	31908033	DEP domain containing 5, GATOR1 subcomplex subunit [Source:HGNC Symbol;Acc:HGNC:18423]	no	no	no	no
ENSG00000100151	447.572	0.206806	0.208088	0.993839	0.320301	0.553156	22	PICK1	38056311	38075701	protein interacting with PRKCA 1 [Source:HGNC Symbol;Acc:HGNC:9394]	no	no	no	no
ENSG00000100154	2554.55	0.0998878	0.186203	0.536446	0.59165	0.770988	22	TTC28	27978014	28679840	tetratricopeptide repeat domain 28 [Source:HGNC Symbol;Acc:HGNC:29179]	no	no	no	no
ENSG00000100162	229.793	-0.225047	0.26674	-0.843693	0.398841	0.625326	22	CENPM	41938737	41947152	centromere protein M [Source:HGNC Symbol;Acc:HGNC:18352]	no	no	no	no
ENSG00000100181	33.5351	8.11674	1.11416	7.28505	3.21546e-13	1.85735e-11	22	TPTEP1	16637040	16638740	TPTE pseudogene 1 [Source:HGNC Symbol;Acc:HGNC:43648]	no	no	no	no
ENSG00000100196	6064.52	0.175541	0.0661513	2.65363	0.00796307	0.0398911	22	KDELR3	38468078	38483447	KDEL endoplasmic reticulum protein retention receptor 3 [Source:HGNC Symbol;Acc:HGNC:6306]	no	no	no	no
ENSG00000100201	25464.4	0.125116	0.143292	0.873156	0.382578	0.611549	22	DDX17	38483438	38507660	DEAD-box helicase 17 [Source:HGNC Symbol;Acc:HGNC:2740]	no	no	no	no
ENSG00000100206	74.5321	-1.03154	0.368618	-2.79839	0.00513575	0.028011	22	DMC1	38518948	38570204	DNA meiotic recombinase 1 [Source:HGNC Symbol;Acc:HGNC:2927]	no	no	no	no
ENSG00000100207	907.255	0.111174	0.116247	0.956362	0.338889	0.570218	22	TCF20	42160013	42343616	transcription factor 20 [Source:HGNC Symbol;Acc:HGNC:11631]	no	no	no	no
ENSG00000100209	225.353	0.131923	0.134877	0.978099	0.328025	0.560112	22	HSCB	28742039	28757515	HscB mitochondrial iron-sulfur cluster cochaperone [Source:HGNC Symbol;Acc:HGNC:28913]	no	no	no	no
ENSG00000100211	503.67	-0.00994306	0.178974	-0.0555558	0.955696	0.979953	22	CBY1	38656636	38673854	chibby family member 1, beta catenin antagonist [Source:HGNC Symbol;Acc:HGNC:1307]	no	no	no	no
ENSG00000100216	1870.47	-0.0206877	0.170012	-0.121684	0.90315	0.953695	22	TOMM22	38681957	38685421	translocase of outer mitochondrial membrane 22 [Source:HGNC Symbol;Acc:HGNC:18002]	no	no	no	no
ENSG00000100219	5977.65	0.107623	0.200892	0.535724	0.59215	0.771077	22	XBP1	28794555	28800597	X-box binding protein 1 [Source:HGNC Symbol;Acc:HGNC:12801]	no	no	no	no
ENSG00000100220	2931	-0.159688	0.1878	-0.85031	0.395153	0.622239	22	RTCB	32387582	32412248	RNA 2',3'-cyclic phosphate and 5'-OH ligase [Source:HGNC Symbol;Acc:HGNC:26935]	no	no	no	no
ENSG00000100221	3184.66	0.0706018	0.133338	0.529495	0.596462	0.774126	22	JOSD1	38685543	38701556	Josephin domain containing 1 [Source:HGNC Symbol;Acc:HGNC:28953]	no	no	no	no
ENSG00000100225	3665.38	-0.0982405	0.122614	-0.801218	0.423005	0.647187	22	FBXO7	32474676	32498829	F-box protein 7 [Source:HGNC Symbol;Acc:HGNC:13586]	no	no	no	no
ENSG00000100226	2116.26	0.141719	0.117287	1.20831	0.226929	0.44824	22	GTPBP1	38705742	38738299	GTP binding protein 1 [Source:HGNC Symbol;Acc:HGNC:4669]	no	no	no	no
ENSG00000100227	3284.46	-0.107292	0.146086	-0.734449	0.462675	0.678253	22	POLDIP3	42583721	42614962	DNA polymerase delta interacting protein 3 [Source:HGNC Symbol;Acc:HGNC:23782]	no	no	no	no
ENSG00000100228	240.531	0.272446	0.240249	1.13402	0.256788	0.483405	22	RAB36	23145366	23165663	RAB36, member RAS oncogene family [Source:HGNC Symbol;Acc:HGNC:9775]	no	no	no	no
ENSG00000100234	44874	-1.72821	0.221089	-7.81679	5.4186e-15	3.85746e-13	22	TIMP3	32801705	32863041	TIMP metallopeptidase inhibitor 3 [Source:HGNC Symbol;Acc:HGNC:11822]	no	no	no	no
ENSG00000100239	2576.88	-0.0601401	0.130903	-0.459424	0.64593	0.807193	22	PPP6R2	50343304	50445090	protein phosphatase 6 regulatory subunit 2 [Source:HGNC Symbol;Acc:HGNC:19253]	no	no	no	no
ENSG00000100241	5814.65	-0.255868	0.151213	-1.69211	0.0906255	0.245281	22	SBF1	50443219	50483923	SET binding factor 1 [Source:HGNC Symbol;Acc:HGNC:10542]	no	no	no	no
ENSG00000100242	4823.07	-0.054482	0.140923	-0.386609	0.699046	0.839084	22	SUN2	38733290	38794143	Sad1 and UNC84 domain containing 2 [Source:HGNC Symbol;Acc:HGNC:14210]	no	no	no	no
ENSG00000100243	29419.4	-0.469146	0.187766	-2.49857	0.0124696	0.0565417	22	CYB5R3	42615730	42720870	cytochrome b5 reductase 3 [Source:HGNC Symbol;Acc:HGNC:2873]	no	no	no	no
ENSG00000100246	419.712	-0.0186875	0.219345	-0.0851969	0.932105	0.967743	22	DNAL4	38778508	38794198	dynein axonemal light chain 4 [Source:HGNC Symbol;Acc:HGNC:2955]	no	no	no	no
ENSG00000100258	6066.35	-0.15775	0.157609	-1.0009	0.316877	0.549258	22	LMF2	50502949	50507702	lipase maturation factor 2 [Source:HGNC Symbol;Acc:HGNC:25096]	no	no	no	no
ENSG00000100263	743.542	-0.258226	0.209982	-1.22975	0.21879	0.438713	22	RHBDD3	29259872	29268209	rhomboid domain containing 3 [Source:HGNC Symbol;Acc:HGNC:1308]	no	no	no	no
ENSG00000100266	3521.16	-0.424624	0.179585	-2.36448	0.0180554	0.0747981	22	PACSIN2	42835412	43015149	protein kinase C and casein kinase substrate in neurons 2 [Source:HGNC Symbol;Acc:HGNC:8571]	no	no	no	no
ENSG00000100271	447.459	-0.142441	0.195089	-0.730134	0.465308	0.68007	22	TTLL1	43039516	43089419	TTL family tubulin polyglutamylase complex subunit L1 [Source:HGNC Symbol;Acc:HGNC:1312]	no	no	no	no
ENSG00000100280	3537.59	-0.3646	0.15539	-2.34635	0.0189583	0.0778305	22	AP1B1	29327680	29388583	adaptor related protein complex 1 subunit beta 1 [Source:HGNC Symbol;Acc:HGNC:554]	no	no	no	no
ENSG00000100281	1713	-0.0772316	0.163904	-0.471199	0.637499	0.80134	22	HMGXB4	35257452	35295807	HMG-box containing 4 [Source:HGNC Symbol;Acc:HGNC:5003]	no	no	no	no
ENSG00000100284	2438.66	-0.671958	0.225032	-2.98605	0.00282605	0.0173759	22	TOM1	35299275	35347992	target of myb1 membrane trafficking protein [Source:HGNC Symbol;Acc:HGNC:11982]	no	no	no	no
ENSG00000100285	135.289	1.52694	0.416462	3.66645	0.000245941	0.00225751	22	NEFH	29480218	29491390	neurofilament heavy chain [Source:HGNC Symbol;Acc:HGNC:7737]	no	no	no	no
ENSG00000100292	11718.8	-1.88886	0.343594	-5.49736	3.85518e-08	9.00226e-07	22	HMOX1	35380361	35394214	heme oxygenase 1 [Source:HGNC Symbol;Acc:HGNC:5013]	no	no	no	no
ENSG00000100294	290.422	-0.284085	0.152675	-1.86072	0.0627838	0.190354	22	MCAT	43132209	43143398	malonyl-CoA-acyl carrier protein transacylase [Source:HGNC Symbol;Acc:HGNC:29622]	no	no	no	no
ENSG00000100296	1629.78	0.200891	0.116543	1.72376	0.0847517	0.235431	22	THOC5	29505879	29555216	THO complex subunit 5 [Source:HGNC Symbol;Acc:HGNC:19074]	no	no	no	no
ENSG00000100297	2052.81	-0.44049	0.21186	-2.07916	0.0376031	0.131571	22	MCM5	35400134	35425431	minichromosome maintenance complex component 5 [Source:HGNC Symbol;Acc:HGNC:6948]	no	no	no	no
ENSG00000100299	2249.83	-0.238766	0.187949	-1.27037	0.203951	0.420548	22	ARSA	50622754	50628173	arylsulfatase A [Source:HGNC Symbol;Acc:HGNC:713]	no	no	no	no
ENSG00000100300	5518.87	-0.620051	0.162971	-3.80467	0.000141996	0.00140133	22	TSPO	43151547	43163242	translocator protein [Source:HGNC Symbol;Acc:HGNC:1158]	no	no	no	no
ENSG00000100302	575.223	-2.29561	0.305034	-7.52576	5.24163e-14	3.41744e-12	22	RASD2	35540831	35553999	RASD family member 2 [Source:HGNC Symbol;Acc:HGNC:18229]	no	no	no	no
ENSG00000100304	1477.25	-0.266479	0.130714	-2.03865	0.0414853	0.140633	22	TTLL12	43166622	43187134	tubulin tyrosine ligase like 12 [Source:HGNC Symbol;Acc:HGNC:28974]	no	no	no	no
ENSG00000100307	342.129	-0.357772	0.257786	-1.38786	0.165179	0.364883	22	CBX7	39120167	39152680	chromobox 7 [Source:HGNC Symbol;Acc:HGNC:1557]	no	no	no	no
ENSG00000100316	51656.7	0.258208	0.150348	1.71741	0.0859048	0.237283	22	RPL3	39312882	39320389	ribosomal protein L3 [Source:HGNC Symbol;Acc:HGNC:10332]	no	no	no	no
ENSG00000100319	296.169	-0.0475623	0.120869	-0.393502	0.693949	0.835835	22	ZMAT5	29730956	29767011	zinc finger matrin-type 5 [Source:HGNC Symbol;Acc:HGNC:28046]	no	no	no	no
ENSG00000100320	8442.22	0.363978	0.139171	2.61533	0.00891406	0.0437237	22	RBFOX2	35738736	36028824	RNA binding fox-1 homolog 2 [Source:HGNC Symbol;Acc:HGNC:9906]	no	no	no	no
ENSG00000100321	411.896	-0.0130074	0.194324	-0.0669364	0.946632	0.976055	22	SYNGR1	39349925	39385575	synaptogyrin 1 [Source:HGNC Symbol;Acc:HGNC:11498]	no	no	no	no
ENSG00000100324	1034.86	-0.0318832	0.109399	-0.291439	0.770716	0.880478	22	TAB1	39399778	39437060	TGF-beta activated kinase 1 (MAP3K7) binding protein 1 [Source:HGNC Symbol;Acc:HGNC:18157]	no	no	no	no
ENSG00000100325	2198.64	-0.133864	0.0820032	-1.63242	0.102591	0.267074	22	ASCC2	29788609	29838304	activating signal cointegrator 1 complex subunit 2 [Source:HGNC Symbol;Acc:HGNC:24103]	no	no	no	no
ENSG00000100330	369.435	0.204597	0.213035	0.960392	0.336858	0.568262	22	MTMR3	29883169	30030868	myotubularin related protein 3 [Source:HGNC Symbol;Acc:HGNC:7451]	no	no	no	no
ENSG00000100335	1774.05	-0.0756927	0.111562	-0.678481	0.497467	0.705381	22	MIEF1	39499432	39518132	mitochondrial elongation factor 1 [Source:HGNC Symbol;Acc:HGNC:25979]	no	no	no	no
ENSG00000100342	108.239	0.888459	0.357277	2.48675	0.0128916	0.0577687	22	APOL1	36253071	36267530	apolipoprotein L1 [Source:HGNC Symbol;Acc:HGNC:618]	no	no	no	no
ENSG00000100344	265.82	0.23591	0.248616	0.948893	0.342675	0.574835	22	PNPLA3	43923792	43964488	patatin like phospholipase domain containing 3 [Source:HGNC Symbol;Acc:HGNC:18590]	no	no	no	no
ENSG00000100345	142850	-0.296941	0.175314	-1.69376	0.0903109	0.244838	22	MYH9	36281280	36388010	myosin heavy chain 9 [Source:HGNC Symbol;Acc:HGNC:7579]	no	no	no	no
ENSG00000100347	1530.77	0.0404831	0.166009	0.243861	0.807339	0.899395	22	SAMM50	43955442	44010531	SAMM50 sorting and assembly machinery component [Source:HGNC Symbol;Acc:HGNC:24276]	no	no	no	no
ENSG00000100348	2402.7	0.0114186	0.131514	0.0868247	0.930811	0.967392	22	TXN2	36467046	36481640	thioredoxin 2 [Source:HGNC Symbol;Acc:HGNC:17772]	no	no	no	no
ENSG00000100350	1094.53	-0.560506	0.204981	-2.73444	0.00624872	0.0326756	22	FOXRED2	36487190	36507221	FAD dependent oxidoreductase domain containing 2 [Source:HGNC Symbol;Acc:HGNC:26264]	no	no	no	no
ENSG00000100353	6800.12	-0.0517903	0.135321	-0.382721	0.701926	0.840627	22	EIF3D	36510855	36529184	eukaryotic translation initiation factor 3 subunit D [Source:HGNC Symbol;Acc:HGNC:3278]	no	no	no	no
ENSG00000100354	1336.98	0.115855	0.181033	0.639965	0.522195	0.723014	22	TNRC6B	40044817	40335808	trinucleotide repeat containing adaptor 6B [Source:HGNC Symbol;Acc:HGNC:29190]	no	no	no	no
ENSG00000100360	921.793	0.281862	0.20249	1.39198	0.163928	0.363089	22	IFT27	36758202	36776256	intraflagellar transport 27 [Source:HGNC Symbol;Acc:HGNC:18626]	no	no	no	no
ENSG00000100364	3194.43	-0.284605	0.143607	-1.98183	0.0474985	0.155548	22	KIAA0930	45192244	45240894	KIAA0930 [Source:HGNC Symbol;Acc:HGNC:1314]	no	no	no	no
ENSG00000100372	852.663	-0.117943	0.175725	-0.671182	0.502104	0.708154	22	SLC25A17	40769630	40819399	solute carrier family 25 member 17 [Source:HGNC Symbol;Acc:HGNC:10987]	no	no	no	no
ENSG00000100376	769.966	0.156236	0.234222	0.667042	0.504745	0.709899	22	FAM118A	45308968	45341955	family with sequence similarity 118 member A [Source:HGNC Symbol;Acc:HGNC:1313]	no	no	no	no
ENSG00000100379	1006.81	0.0583386	0.109638	0.532104	0.594654	0.773052	22	KCTD17	37051739	37063390	potassium channel tetramerization domain containing 17 [Source:HGNC Symbol;Acc:HGNC:25705]	no	no	no	no
ENSG00000100380	10387.8	-0.157239	0.187126	-0.840286	0.400748	0.626898	22	ST13	40824535	40856639	ST13 Hsp70 interacting protein [Source:HGNC Symbol;Acc:HGNC:11343]	no	no	no	no
ENSG00000100387	2019.52	0.124817	0.0985663	1.26633	0.205396	0.422402	22	RBX1	40951347	40973309	ring-box 1 [Source:HGNC Symbol;Acc:HGNC:9928]	no	no	no	no
ENSG00000100393	4700.85	0.00140864	0.126643	0.0111229	0.991125	0.994069	22	EP300	41092592	41180077	E1A binding protein p300 [Source:HGNC Symbol;Acc:HGNC:3373]	no	no	no	no
ENSG00000100395	872.181	-0.00177344	0.102423	-0.0173148	0.986185	0.992305	22	L3MBTL2	41205282	41231271	L3MBTL histone methyl-lysine binding protein 2 [Source:HGNC Symbol;Acc:HGNC:18594]	no	no	no	no
ENSG00000100401	5292.86	-0.332984	0.215151	-1.54767	0.121701	0.29768	22	RANGAP1	41244779	41286187	Ran GTPase activating protein 1 [Source:HGNC Symbol;Acc:HGNC:9854]	no	no	no	no
ENSG00000100403	7754.83	-0.138311	0.129462	-1.06835	0.285363	0.516026	22	ZC3H7B	41301525	41360147	zinc finger CCCH-type containing 7B [Source:HGNC Symbol;Acc:HGNC:30869]	no	no	no	no
ENSG00000100410	797.857	-0.124741	0.133109	-0.937141	0.348686	0.580189	22	PHF5A	41459717	41468692	PHD finger protein 5A [Source:HGNC Symbol;Acc:HGNC:18000]	no	no	no	no
ENSG00000100412	2361.8	-0.217027	0.14922	-1.45441	0.145832	0.337364	22	ACO2	41447830	41529273	aconitase 2 [Source:HGNC Symbol;Acc:HGNC:118]	no	no	no	no
ENSG00000100413	1545.45	-0.307396	0.128654	-2.38933	0.0168794	0.0711591	22	POLR3H	41525799	41544606	RNA polymerase III subunit H [Source:HGNC Symbol;Acc:HGNC:30349]	no	no	no	no
ENSG00000100416	1399.04	0.114924	0.144335	0.796235	0.425896	0.649576	22	TRMU	46330875	46357340	tRNA mitochondrial 2-thiouridylase [Source:HGNC Symbol;Acc:HGNC:25481]	no	no	no	no
ENSG00000100417	1536.89	-0.0305949	0.0979806	-0.312254	0.754847	0.872311	22	PMM1	41576900	41589871	phosphomannomutase 1 [Source:HGNC Symbol;Acc:HGNC:9114]	no	no	no	no
ENSG00000100418	2039.82	0.00364594	0.0978627	0.0372557	0.970281	0.986232	22	DESI1	41598028	41621043	desumoylating isopeptidase 1 [Source:HGNC Symbol;Acc:HGNC:24577]	no	no	no	no
ENSG00000100422	3306.67	-0.370118	0.152519	-2.4267	0.0152369	0.0657073	22	CERK	46684410	46738252	ceramide kinase [Source:HGNC Symbol;Acc:HGNC:19256]	no	no	no	no
ENSG00000100425	1904.95	0.161329	0.0760994	2.11998	0.0340077	0.121707	22	BRD1	49773283	49827873	bromodomain containing 1 [Source:HGNC Symbol;Acc:HGNC:1102]	no	no	no	no
ENSG00000100426	1222.48	0.253334	0.158371	1.59962	0.109683	0.278703	22	ZBED4	49853844	49890080	zinc finger BED-type containing 4 [Source:HGNC Symbol;Acc:HGNC:20721]	no	no	no	no
ENSG00000100429	102.263	-0.173869	0.205985	-0.844086	0.398621	0.625205	22	HDAC10	50245183	50251405	histone deacetylase 10 [Source:HGNC Symbol;Acc:HGNC:18128]	no	no	no	no
ENSG00000100439	1891.18	-0.758879	0.206214	-3.68006	0.000233175	0.00215503	14	ABHD4	22598290	22612963	abhydrolase domain containing 4, N-acyl phospholipase B [Source:HGNC Symbol;Acc:HGNC:20154]	no	no	no	no
ENSG00000100441	2875.34	0.128317	0.192029	0.668217	0.503995	0.709223	14	KHNYN	24429286	24441843	KH and NYN domain containing [Source:HGNC Symbol;Acc:HGNC:20166]	no	no	no	no
ENSG00000100442	1800.28	0.249824	0.13567	1.8414	0.0655623	0.196508	14	FKBP3	45115599	45135319	FKBP prolyl isomerase 3 [Source:HGNC Symbol;Acc:HGNC:3719]	no	no	no	no
ENSG00000100445	254.61	0.550989	0.143193	3.84788	0.000119145	0.0011969	14	SDR39U1	24439766	24442905	short chain dehydrogenase/reductase family 39U member 1 [Source:HGNC Symbol;Acc:HGNC:20275]	no	no	no	no
ENSG00000100461	1976.25	-0.0451103	0.131107	-0.344071	0.730793	0.858497	14	RBM23	22893204	22919182	RNA binding motif protein 23 [Source:HGNC Symbol;Acc:HGNC:20155]	no	no	no	no
ENSG00000100462	1224.07	-0.0637391	0.15995	-0.398494	0.690266	0.833407	14	PRMT5	22920525	22929408	protein arginine methyltransferase 5 [Source:HGNC Symbol;Acc:HGNC:10894]	no	no	no	no
ENSG00000100478	311.269	0.0756567	0.182485	0.414591	0.678441	0.826395	14	AP4S1	31025106	31130996	adaptor related protein complex 4 subunit sigma 1 [Source:HGNC Symbol;Acc:HGNC:575]	no	no	no	no
ENSG00000100479	187.285	-0.66127	0.240328	-2.75153	0.0059317	0.0315511	14	POLE2	49643555	49688422	DNA polymerase epsilon 2, accessory subunit [Source:HGNC Symbol;Acc:HGNC:9178]	no	no	no	no
ENSG00000100483	364.006	0.222499	0.126617	1.75726	0.0788738	0.224065	14	VCPKMT	50108632	50116600	valosin containing protein lysine methyltransferase [Source:HGNC Symbol;Acc:HGNC:20352]	no	no	no	no
ENSG00000100485	1743.58	-0.014789	0.0834584	-0.177202	0.85935	0.92855	14	SOS2	50117130	50231578	SOS Ras/Rho guanine nucleotide exchange factor 2 [Source:HGNC Symbol;Acc:HGNC:11188]	no	no	no	no
ENSG00000100490	308.922	-1.64373	0.260488	-6.3102	2.78675e-10	1.01106e-08	14	CDKL1	50326265	50416461	cyclin dependent kinase like 1 [Source:HGNC Symbol;Acc:HGNC:1781]	no	no	no	no
ENSG00000100503	3651.21	-0.234668	0.0804898	-2.9155	0.00355123	0.0209167	14	NIN	50719763	50831162	ninein [Source:HGNC Symbol;Acc:HGNC:14906]	no	no	no	no
ENSG00000100504	2009.12	-0.472574	0.197156	-2.39696	0.0165318	0.0700527	14	PYGL	50857891	50944483	glycogen phosphorylase L [Source:HGNC Symbol;Acc:HGNC:9725]	no	no	no	no
ENSG00000100519	2825.71	-0.0375381	0.158177	-0.237318	0.81241	0.902302	14	PSMC6	52707178	52728590	proteasome 26S subunit, ATPase 6 [Source:HGNC Symbol;Acc:HGNC:9553]	no	no	no	no
ENSG00000100522	2138.84	0.0582616	0.196296	0.296804	0.766616	0.878477	14	GNPNAT1	52775193	52791668	glucosamine-phosphate N-acetyltransferase 1 [Source:HGNC Symbol;Acc:HGNC:19980]	no	no	no	no
ENSG00000100523	1118.79	0.0122262	0.0828127	0.147637	0.882629	0.942208	14	DDHD1	53036745	53153323	DDHD domain containing 1 [Source:HGNC Symbol;Acc:HGNC:19714]	no	no	no	no
ENSG00000100526	553.194	-0.082221	0.243526	-0.337627	0.735645	0.861401	14	CDKN3	54396849	54420218	cyclin dependent kinase inhibitor 3 [Source:HGNC Symbol;Acc:HGNC:1791]	no	no	no	no
ENSG00000100528	3480.18	-0.214436	0.149912	-1.43042	0.152598	0.347645	14	CNIH1	54423561	54441391	cornichon family AMPA receptor auxiliary protein 1 [Source:HGNC Symbol;Acc:HGNC:19431]	no	no	no	no
ENSG00000100532	385.809	-0.0694115	0.180959	-0.383575	0.701293	0.840286	14	CGRRF1	54509812	54539292	cell growth regulator with ring finger domain 1 [Source:HGNC Symbol;Acc:HGNC:15528]	no	no	no	no
ENSG00000100554	2823.14	-0.314393	0.129115	-2.43498	0.0148927	0.0645613	14	ATP6V1D	67294371	67360265	ATPase H+ transporting V1 subunit D [Source:HGNC Symbol;Acc:HGNC:13527]	no	no	no	no
ENSG00000100558	395.778	-0.958689	0.266249	-3.60072	0.000317336	0.00278993	14	PLEK2	67386984	67412167	pleckstrin 2 [Source:HGNC Symbol;Acc:HGNC:19238]	no	no	no	no
ENSG00000100564	313.814	-0.133598	0.133042	-1.00418	0.315292	0.54752	14	PIGH	67581955	67600286	phosphatidylinositol glycan anchor biosynthesis class H [Source:HGNC Symbol;Acc:HGNC:8964]	no	no	no	no
ENSG00000100567	2227.06	0.0064956	0.157908	0.0411354	0.967188	0.985505	14	PSMA3	58244843	58272012	proteasome 20S subunit alpha 3 [Source:HGNC Symbol;Acc:HGNC:9532]	no	no	no	no
ENSG00000100568	1914.32	-0.270602	0.116325	-2.32626	0.0200045	0.0810646	14	VTI1B	67647085	67674820	vesicle transport through interaction with t-SNAREs 1B [Source:HGNC Symbol;Acc:HGNC:17793]	no	no	no	no
ENSG00000100575	490.956	-0.0116118	0.183484	-0.0632851	0.949539	0.977501	14	TIMM9	58408495	58427531	translocase of inner mitochondrial membrane 9 [Source:HGNC Symbol;Acc:HGNC:11819]	no	no	no	no
ENSG00000100577	411.039	0.47776	0.159883	2.98818	0.00280647	0.0172836	14	GSTZ1	77320996	77331597	glutathione S-transferase zeta 1 [Source:HGNC Symbol;Acc:HGNC:4643]	no	no	no	no
ENSG00000100578	1001.76	-0.361108	0.18528	-1.94898	0.0512974	0.164263	14	KIAA0586	58427385	58551297	KIAA0586 [Source:HGNC Symbol;Acc:HGNC:19960]	no	no	no	no
ENSG00000100580	911.203	-0.350512	0.149402	-2.3461	0.0189712	0.0778592	14	TMED8	77335029	77377094	transmembrane p24 trafficking protein family member 8 [Source:HGNC Symbol;Acc:HGNC:18633]	no	no	no	no
ENSG00000100591	3254.92	-0.0173568	0.126649	-0.137046	0.890994	0.947315	14	AHSA1	77457870	77469472	activator of HSP90 ATPase activity 1 [Source:HGNC Symbol;Acc:HGNC:1189]	no	no	no	no
ENSG00000100592	965.19	-0.0552162	0.229785	-0.240295	0.810102	0.900721	14	DAAM1	59188646	59371405	dishevelled associated activator of morphogenesis 1 [Source:HGNC Symbol;Acc:HGNC:18142]	no	no	no	no
ENSG00000100596	5200.8	-0.2689	0.190342	-1.41272	0.157738	0.354696	14	SPTLC2	77505997	77616637	serine palmitoyltransferase long chain base subunit 2 [Source:HGNC Symbol;Acc:HGNC:11278]	no	no	no	no
ENSG00000100599	1692.21	-0.0101024	0.102577	-0.0984862	0.921546	0.962919	14	RIN3	92513781	92688994	Ras and Rab interactor 3 [Source:HGNC Symbol;Acc:HGNC:18751]	no	no	no	no
ENSG00000100600	6949.31	0.184773	0.29796	0.620128	0.535173	0.732548	14	LGMN	92703807	92748679	legumain [Source:HGNC Symbol;Acc:HGNC:9472]	no	no	no	no
ENSG00000100601	359.006	-0.156566	0.181061	-0.864719	0.387193	0.615044	14	ALKBH1	77672404	77708023	alkB homolog 1, histone H2A dioxygenase [Source:HGNC Symbol;Acc:HGNC:17911]	no	no	no	no
ENSG00000100603	2387.01	0.0161941	0.146088	0.110852	0.911734	0.958408	14	SNW1	77717599	77761207	SNW domain containing 1 [Source:HGNC Symbol;Acc:HGNC:16696]	no	no	no	no
ENSG00000100605	1148.78	-0.696563	0.0838333	-8.3089	9.65914e-17	9.02205e-15	14	ITPK1	92936914	93116320	inositol-tetrakisphosphate 1-kinase [Source:HGNC Symbol;Acc:HGNC:6177]	no	no	no	no
ENSG00000100612	1067.72	-0.335391	0.162125	-2.06872	0.0385728	0.13358	14	DHRS7	60144119	60169856	dehydrogenase/reductase 7 [Source:HGNC Symbol;Acc:HGNC:21524]	no	no	no	no
ENSG00000100614	2183.26	0.00996368	0.112689	0.0884175	0.929545	0.966644	14	PPM1A	60245752	60299087	protein phosphatase, Mg2+/Mn2+ dependent 1A [Source:HGNC Symbol;Acc:HGNC:9275]	no	no	no	no
ENSG00000100625	535.395	1.33395	0.170415	7.82768	4.96944e-15	3.61588e-13	14	SIX4	60709539	60724351	SIX homeobox 4 [Source:HGNC Symbol;Acc:HGNC:10890]	no	no	no	no
ENSG00000100626	74.7611	0.882087	0.366099	2.40942	0.0159779	0.0680998	14	GALNT16	69259277	69357033	polypeptide N-acetylgalactosaminyltransferase 16 [Source:HGNC Symbol;Acc:HGNC:23233]	no	no	no	no
ENSG00000100629	265.359	-0.291562	0.254291	-1.14657	0.251561	0.477661	14	CEP128	80476983	80959517	centrosomal protein 128 [Source:HGNC Symbol;Acc:HGNC:20359]	no	no	no	no
ENSG00000100632	2592.11	0.0541872	0.159025	0.340746	0.733295	0.860051	14	ERH	69380128	69398299	ERH mRNA splicing and mitosis factor [Source:HGNC Symbol;Acc:HGNC:3447]	no	no	no	no
ENSG00000100644	30760.9	0.254589	0.180911	1.40726	0.159351	0.356792	14	HIF1A	61695513	61748259	hypoxia inducible factor 1 subunit alpha [Source:HGNC Symbol;Acc:HGNC:4910]	no	no	no	no
ENSG00000100647	1348.55	-0.197877	0.0772096	-2.56286	0.0103815	0.0488825	14	SUSD6	69611596	69715144	sushi domain containing 6 [Source:HGNC Symbol;Acc:HGNC:19956]	no	no	no	no
ENSG00000100650	7463.54	0.11742	0.103469	1.13484	0.256442	0.483099	14	SRSF5	69726900	69772005	serine and arginine rich splicing factor 5 [Source:HGNC Symbol;Acc:HGNC:10787]	no	no	no	no
ENSG00000100664	9765.94	0.0270474	0.138111	0.195838	0.844737	0.921112	14	EIF5	103333544	103345025	eukaryotic translation initiation factor 5 [Source:HGNC Symbol;Acc:HGNC:3299]	no	no	no	no
ENSG00000100697	3125.73	0.0422476	0.125091	0.337734	0.735564	0.861401	14	DICER1	95086228	95158010	dicer 1, ribonuclease III [Source:HGNC Symbol;Acc:HGNC:17098]	no	no	no	no
ENSG00000100711	1083.82	-0.0766956	0.142541	-0.538061	0.590535	0.770568	14	ZFYVE21	103715730	103733668	zinc finger FYVE-type containing 21 [Source:HGNC Symbol;Acc:HGNC:20760]	no	no	no	no
ENSG00000100714	2673.77	-0.816303	0.187018	-4.36483	1.2722e-05	0.000167549	14	MTHFD1	64388031	64463457	methylenetetrahydrofolate dehydrogenase, cyclohydrolase and formyltetrahydrofolate synthetase 1 [Source:HGNC Symbol;Acc:HGNC:7432]	no	no	no	no
ENSG00000100722	2567.56	-0.100958	0.15479	-0.652225	0.514256	0.717377	14	ZC3H14	88562970	88627596	zinc finger CCCH-type containing 14 [Source:HGNC Symbol;Acc:HGNC:20509]	no	no	no	no
ENSG00000100726	1197.69	-0.340273	0.154565	-2.20148	0.0277017	0.103528	16	TELO2	1493344	1510457	telomere maintenance 2 [Source:HGNC Symbol;Acc:HGNC:29099]	no	no	no	no
ENSG00000100731	4253.84	-0.229725	0.142608	-1.61088	0.107205	0.274839	14	PCNX1	70907405	71115382	pecanex 1 [Source:HGNC Symbol;Acc:HGNC:19740]	no	no	no	no
ENSG00000100739	468.621	0.591212	0.211272	2.79835	0.00513642	0.028011	14	BDKRB1	96256210	96268967	bradykinin receptor B1 [Source:HGNC Symbol;Acc:HGNC:1029]	no	no	no	no
ENSG00000100744	884.656	-0.358323	0.159896	-2.24097	0.025028	0.0956626	14	GSKIP	96363452	96387288	GSK3B interacting protein [Source:HGNC Symbol;Acc:HGNC:20343]	no	no	no	no
ENSG00000100749	490.209	-0.420442	0.226883	-1.85312	0.0638653	0.192429	14	VRK1	96797304	96954846	VRK serine/threonine kinase 1 [Source:HGNC Symbol;Acc:HGNC:12718]	no	no	no	no
ENSG00000100764	2100.98	0.0155438	0.157308	0.0988109	0.921288	0.962889	14	PSMC1	90256527	90275429	proteasome 26S subunit, ATPase 1 [Source:HGNC Symbol;Acc:HGNC:9547]	no	no	no	no
ENSG00000100767	97.3753	0.63733	0.23666	2.69303	0.00708066	0.036285	14	PAPLN	73237497	73274640	papilin, proteoglycan like sulfated glycoprotein [Source:HGNC Symbol;Acc:HGNC:19262]	no	no	no	no
ENSG00000100796	2798.82	-0.0489857	0.143571	-0.341195	0.732957	0.859959	14	PPP4R3A	91457508	91510554	protein phosphatase 4 regulatory subunit 3A [Source:HGNC Symbol;Acc:HGNC:20219]	no	no	no	no
ENSG00000100802	210.334	0.0903849	0.152811	0.59148	0.554199	0.746784	14	C14orf93	22985894	23010166	chromosome 14 open reading frame 93 [Source:HGNC Symbol;Acc:HGNC:20162]	no	no	no	no
ENSG00000100804	4398.45	0.105466	0.108211	0.974637	0.329741	0.561319	14	PSMB5	23016543	23035230	proteasome 20S subunit beta 5 [Source:HGNC Symbol;Acc:HGNC:9542]	no	no	no	no
ENSG00000100811	4293.68	-0.0371217	0.169942	-0.218438	0.827088	0.910232	14	YY1	100238298	100282788	YY1 transcription factor [Source:HGNC Symbol;Acc:HGNC:12856]	no	no	no	no
ENSG00000100813	10592.8	0.139716	0.0985769	1.41733	0.156386	0.352904	14	ACIN1	23058564	23095614	apoptotic chromatin condensation inducer 1 [Source:HGNC Symbol;Acc:HGNC:17066]	no	no	no	no
ENSG00000100814	991.561	-0.168465	0.197809	-0.851656	0.394405	0.621702	14	CCNB1IP1	20311368	20333312	cyclin B1 interacting protein 1 [Source:HGNC Symbol;Acc:HGNC:19437]	no	no	no	no
ENSG00000100815	2912.17	0.164646	0.122813	1.34063	0.180042	0.38738	14	TRIP11	91965991	92040896	thyroid hormone receptor interactor 11 [Source:HGNC Symbol;Acc:HGNC:12305]	no	no	no	no
ENSG00000100823	4760.43	-0.185486	0.110741	-1.67495	0.0939434	0.251266	14	APEX1	20455191	20457772	apurinic/apyrimidinic endodeoxyribonuclease 1 [Source:HGNC Symbol;Acc:HGNC:587]	no	no	no	no
ENSG00000100836	2969.39	0.292016	0.122657	2.38075	0.0172773	0.0724423	14	PABPN1	23321457	23326163	poly(A) binding protein nuclear 1 [Source:HGNC Symbol;Acc:HGNC:8565]	no	no	no	no
ENSG00000100842	2261.6	-0.122883	0.147764	-0.831613	0.405627	0.632128	14	EFS	23356403	23365752	embryonal Fyn-associated substrate [Source:HGNC Symbol;Acc:HGNC:16898]	no	no	no	no
ENSG00000100852	3168.56	-0.216434	0.111486	-1.94135	0.0522158	0.166673	14	ARHGAP5	32076114	32159728	Rho GTPase activating protein 5 [Source:HGNC Symbol;Acc:HGNC:675]	no	no	no	no
ENSG00000100865	999.289	-0.14403	0.0818478	-1.75973	0.0784534	0.223425	14	CINP	102341102	102362916	cyclin dependent kinase 2 interacting protein [Source:HGNC Symbol;Acc:HGNC:23789]	no	no	no	no
ENSG00000100883	3504.43	0.121495	0.174752	0.695241	0.486905	0.697166	14	SRP54	34981957	35029686	signal recognition particle 54 [Source:HGNC Symbol;Acc:HGNC:11301]	no	no	no	no
ENSG00000100888	3543.25	-0.0271929	0.160666	-0.169251	0.8656	0.932507	14	CHD8	21385194	21456126	chromodomain helicase DNA binding protein 8 [Source:HGNC Symbol;Acc:HGNC:20153]	no	no	no	no
ENSG00000100889	3337.13	0.907816	0.228767	3.96829	7.23895e-05	0.000777626	14	PCK2	24094053	24110598	phosphoenolpyruvate carboxykinase 2, mitochondrial [Source:HGNC Symbol;Acc:HGNC:8725]	no	no	no	no
ENSG00000100890	255.47	-0.149116	0.148589	-1.00354	0.315598	0.547822	14	PRORP	35121846	35277622	protein only RNase P catalytic subunit [Source:HGNC Symbol;Acc:HGNC:19958]	no	no	no	no
ENSG00000100897	1320.57	-0.0870038	0.0974962	-0.892382	0.372188	0.601807	14	DCAF11	24114195	24125242	DDB1 and CUL4 associated factor 11 [Source:HGNC Symbol;Acc:HGNC:20258]	no	no	no	no
ENSG00000100902	123.664	0.120477	0.136782	0.880794	0.378429	0.607795	14	PSMA6	35278633	35317493	proteasome 20S subunit alpha 6 [Source:HGNC Symbol;Acc:HGNC:9535]	no	no	no	no
ENSG00000100906	1102.96	0.0017874	0.115617	0.0154597	0.987665	0.993004	14	NFKBIA	35401079	35404749	NFKB inhibitor alpha [Source:HGNC Symbol;Acc:HGNC:7797]	no	no	no	no
ENSG00000100908	255.99	0.121537	0.179689	0.676373	0.498804	0.706143	14	EMC9	24138959	24141591	ER membrane protein complex subunit 9 [Source:HGNC Symbol;Acc:HGNC:20273]	no	no	no	no
ENSG00000100911	2395.63	0.552999	0.240774	2.29675	0.0216329	0.0856599	14	PSME2	24143362	24147570	proteasome activator subunit 2 [Source:HGNC Symbol;Acc:HGNC:9569]	no	no	no	no
ENSG00000100916	621.581	-0.253407	0.147657	-1.71619	0.0861274	0.237798	14	BRMS1L	35826338	35932325	BRMS1 like transcriptional repressor [Source:HGNC Symbol;Acc:HGNC:20512]	no	no	no	no
ENSG00000100918	232.62	0.824555	0.235721	3.49801	0.000468735	0.00390712	14	REC8	24171853	24180257	REC8 meiotic recombination protein [Source:HGNC Symbol;Acc:HGNC:16879]	no	no	no	no
ENSG00000100926	127.462	-0.237123	0.14342	-1.65334	0.0982619	0.259289	14	TM9SF1	24189149	24195687	transmembrane 9 superfamily member 1 [Source:HGNC Symbol;Acc:HGNC:11864]	no	no	no	no
ENSG00000100934	14680.1	0.0139978	0.108422	0.129104	0.897275	0.950705	14	SEC23A	39031919	39109646	SEC23 homolog A, COPII coat complex component [Source:HGNC Symbol;Acc:HGNC:10701]	no	no	no	no
ENSG00000100938	1627.72	-0.0039169	0.120876	-0.0324042	0.97415	0.98806	14	GMPR2	24232422	24239242	guanosine monophosphate reductase 2 [Source:HGNC Symbol;Acc:HGNC:4377]	no	no	no	no
ENSG00000100941	4678.88	0.17902	0.130402	1.37284	0.169803	0.371294	14	PNN	39175183	39183220	pinin, desmosome associated protein [Source:HGNC Symbol;Acc:HGNC:9162]	no	no	no	no
ENSG00000100949	822.208	-0.169423	0.172116	-0.984349	0.324944	0.557072	14	RABGGTA	24265538	24271611	Rab geranylgeranyltransferase subunit alpha [Source:HGNC Symbol;Acc:HGNC:9795]	no	no	no	no
ENSG00000100968	5102.18	0.25833	0.219834	1.17512	0.239948	0.464245	14	NFATC4	24365673	24379604	nuclear factor of activated T cells 4 [Source:HGNC Symbol;Acc:HGNC:7778]	no	no	no	no
ENSG00000100979	1094.02	0.24109	0.154166	1.56383	0.117857	0.291474	20	PLTP	45898621	45912155	phospholipid transfer protein [Source:HGNC Symbol;Acc:HGNC:9093]	no	no	no	no
ENSG00000100982	1390.01	0.0841412	0.118202	0.711841	0.476563	0.688904	20	PCIF1	45934683	45948023	phosphorylated CTD interacting factor 1 [Source:HGNC Symbol;Acc:HGNC:16200]	no	no	no	no
ENSG00000100983	2323.73	-0.296251	0.14764	-2.00657	0.044795	0.14894	20	GSS	34928432	34956027	glutathione synthetase [Source:HGNC Symbol;Acc:HGNC:4624]	no	no	no	no
ENSG00000100991	5538.94	0.0166323	0.157021	0.105924	0.915642	0.960036	20	TRPC4AP	35002404	35092807	transient receptor potential cation channel subfamily C member 4 associated protein [Source:HGNC Symbol;Acc:HGNC:16181]	no	no	no	no
ENSG00000100994	7446.89	0.366117	0.182797	2.00287	0.0451914	0.150068	20	PYGB	25248085	25298012	glycogen phosphorylase B [Source:HGNC Symbol;Acc:HGNC:9723]	no	no	no	no
ENSG00000100997	2573.2	-0.615035	0.200918	-3.06112	0.00220513	0.0142012	20	ABHD12	25294742	25390835	abhydrolase domain containing 12, lysophospholipase [Source:HGNC Symbol;Acc:HGNC:15868]	no	no	no	no
ENSG00000101000	527.492	-0.884265	0.134128	-6.59271	4.31871e-11	1.81717e-09	20	PROCR	35172072	35216240	protein C receptor [Source:HGNC Symbol;Acc:HGNC:9452]	no	no	no	no
ENSG00000101003	397.232	-0.547555	0.243913	-2.24488	0.0247758	0.0949089	20	GINS1	25391008	25452700	GINS complex subunit 1 [Source:HGNC Symbol;Acc:HGNC:28980]	no	no	no	no
ENSG00000101004	690.439	0.00601061	0.210192	0.0285958	0.977187	0.988971	20	NINL	25451594	25585531	ninein like [Source:HGNC Symbol;Acc:HGNC:29163]	no	no	no	no
ENSG00000101017	151.802	0.650947	0.229439	2.83713	0.00455211	0.0254247	20	CD40	46118271	46129863	CD40 molecule [Source:HGNC Symbol;Acc:HGNC:11919]	no	no	no	no
ENSG00000101019	1422.28	0.134485	0.111045	1.21109	0.225863	0.447175	20	UQCC1	35302566	35412031	ubiquinol-cytochrome c reductase complex assembly factor 1 [Source:HGNC Symbol;Acc:HGNC:15891]	no	no	no	no
ENSG00000101040	1609.71	0.381636	0.138882	2.74791	0.00599765	0.0317863	20	ZMYND8	47209214	47356889	zinc finger MYND-type containing 8 [Source:HGNC Symbol;Acc:HGNC:9397]	no	no	no	no
ENSG00000101052	1207.76	-0.00526247	0.169824	-0.0309879	0.975279	0.988067	20	IFT52	43590937	43647299	intraflagellar transport 52 [Source:HGNC Symbol;Acc:HGNC:15901]	no	no	no	no
ENSG00000101057	1195.28	-0.128595	0.256022	-0.502281	0.61547	0.786049	20	MYBL2	43667019	43716495	MYB proto-oncogene like 2 [Source:HGNC Symbol;Acc:HGNC:7548]	no	no	no	no
ENSG00000101079	1893.34	-0.21503	0.122441	-1.75619	0.0790552	0.224436	20	NDRG3	36651766	36746090	NDRG family member 3 [Source:HGNC Symbol;Acc:HGNC:14462]	no	no	no	no
ENSG00000101084	188.198	-0.2946	0.238775	-1.2338	0.217279	0.436794	20	RAB5IF	36605779	36612557	RAB5 interacting factor [Source:HGNC Symbol;Acc:HGNC:15870]	no	no	no	no
ENSG00000101096	106.066	1.65363	0.187039	8.84108	9.4796e-19	1.20044e-16	20	NFATC2	51386957	51562831	nuclear factor of activated T cells 2 [Source:HGNC Symbol;Acc:HGNC:7776]	no	no	no	no
ENSG00000101104	1178.96	0.384491	0.195267	1.96906	0.0489467	0.158761	20	PABPC1L	44910060	44959035	poly(A) binding protein cytoplasmic 1 like [Source:HGNC Symbol;Acc:HGNC:15797]	no	no	no	no
ENSG00000101109	1769.15	0.0633095	0.113602	0.55729	0.577329	0.762069	20	STK4	44966494	45080021	serine/threonine kinase 4 [Source:HGNC Symbol;Acc:HGNC:11408]	no	no	no	no
ENSG00000101115	46.8399	6.5844	0.859094	7.66435	1.79737e-14	1.23289e-12	20	SALL4	51782331	51802521	spalt like transcription factor 4 [Source:HGNC Symbol;Acc:HGNC:15924]	no	no	no	no
ENSG00000101126	4192.79	0.133842	0.150561	0.888954	0.374028	0.603596	20	ADNP	50888916	50931437	activity dependent neuroprotector homeobox [Source:HGNC Symbol;Acc:HGNC:15766]	no	no	no	no
ENSG00000101132	897.786	-0.0136957	0.199162	-0.0687668	0.945175	0.975486	20	PFDN4	54208087	54228052	prefoldin subunit 4 [Source:HGNC Symbol;Acc:HGNC:8868]	no	no	no	no
ENSG00000101134	915.278	-0.838445	0.228657	-3.66682	0.000245582	0.00225702	20	DOK5	54475593	54651169	docking protein 5 [Source:HGNC Symbol;Acc:HGNC:16173]	no	no	no	no
ENSG00000101138	1062.05	0.0247262	0.156875	0.157617	0.874758	0.937845	20	CSTF1	56392371	56406362	cleavage stimulation factor subunit 1 [Source:HGNC Symbol;Acc:HGNC:2483]	no	no	no	no
ENSG00000101146	1285.08	-0.0899734	0.153906	-0.584598	0.558818	0.749012	20	RAE1	57351223	57379211	ribonucleic acid export 1 [Source:HGNC Symbol;Acc:HGNC:9828]	no	no	no	no
ENSG00000101150	8257.76	-0.103776	0.0602898	-1.72129	0.0851975	0.235983	20	TPD52L2	63865228	63891545	TPD52 like 2 [Source:HGNC Symbol;Acc:HGNC:12007]	no	no	no	no
ENSG00000101152	3828.99	-0.251255	0.157333	-1.59696	0.110275	0.279722	20	DNAJC5	63895126	63936031	DnaJ heat shock protein family (Hsp40) member C5 [Source:HGNC Symbol;Acc:HGNC:16235]	no	no	no	no
ENSG00000101158	2709.56	0.0789334	0.093291	0.846099	0.397498	0.624406	20	NELFCD	58981208	58995133	negative elongation factor complex member C/D [Source:HGNC Symbol;Acc:HGNC:15934]	no	no	no	no
ENSG00000101160	15800.9	-0.0593884	0.137564	-0.431714	0.66595	0.818578	20	CTSZ	58985686	59008238	cathepsin Z [Source:HGNC Symbol;Acc:HGNC:2547]	no	no	no	no
ENSG00000101161	3520.83	-0.0577877	0.0646799	-0.893441	0.371621	0.601703	20	PRPF6	63981132	64033100	pre-mRNA processing factor 6 [Source:HGNC Symbol;Acc:HGNC:15860]	no	no	no	no
ENSG00000101166	2045.8	-0.0991044	0.178233	-0.556037	0.578186	0.762385	20	PRELID3B	59033145	59042809	PRELI domain containing 3B [Source:HGNC Symbol;Acc:HGNC:15892]	no	no	no	no
ENSG00000101181	981.491	0.00836148	0.143019	0.0584642	0.953379	0.978644	20	MTG2	62183028	62203568	mitochondrial ribosome associated GTPase 2 [Source:HGNC Symbol;Acc:HGNC:16239]	no	no	no	no
ENSG00000101182	5726.95	-0.0166285	0.127383	-0.130539	0.89614	0.950101	20	PSMA7	62136733	62143440	proteasome 20S subunit alpha 7 [Source:HGNC Symbol;Acc:HGNC:9536]	no	no	no	no
ENSG00000101189	989.289	0.0504415	0.136849	0.368593	0.712431	0.846848	20	MRGBP	62796473	62801729	MRG domain binding protein [Source:HGNC Symbol;Acc:HGNC:15866]	no	no	no	no
ENSG00000101190	673.199	-0.316252	0.14835	-2.13179	0.033024	0.118908	20	TCFL5	62841005	62861822	transcription factor like 5 [Source:HGNC Symbol;Acc:HGNC:11646]	no	no	no	no
ENSG00000101191	3989.75	0.101488	0.0993969	1.02104	0.307236	0.538071	20	DIDO1	62877738	62937952	death inducer-obliterator 1 [Source:HGNC Symbol;Acc:HGNC:2680]	no	no	no	no
ENSG00000101193	1901.72	0.115941	0.0760038	1.52546	0.127144	0.306457	20	GID8	62938147	62948475	GID complex subunit 8 homolog [Source:HGNC Symbol;Acc:HGNC:15857]	no	no	no	no
ENSG00000101194	3425.9	-0.318783	0.168753	-1.88905	0.0588852	0.181876	20	SLC17A9	62952707	62969585	solute carrier family 17 member 9 [Source:HGNC Symbol;Acc:HGNC:16192]	no	no	no	no
ENSG00000101199	6910.65	0.240576	0.167976	1.4322	0.152085	0.347074	20	ARFGAP1	63272785	63289790	ADP ribosylation factor GTPase activating protein 1 [Source:HGNC Symbol;Acc:HGNC:15852]	no	no	no	no
ENSG00000101216	925.458	-0.140045	0.125562	-1.11534	0.264703	0.491767	20	GMEB2	63587602	63627101	glucocorticoid modulatory element binding protein 2 [Source:HGNC Symbol;Acc:HGNC:4371]	no	no	no	no
ENSG00000101220	1092.39	-0.525082	0.134765	-3.89627	9.76847e-05	0.001013	20	C20orf27	3753508	3767781	chromosome 20 open reading frame 27 [Source:HGNC Symbol;Acc:HGNC:15873]	no	no	no	no
ENSG00000101224	4143.11	0.0699672	0.133293	0.524914	0.599643	0.776292	20	CDC25B	3786772	3806121	cell division cycle 25B [Source:HGNC Symbol;Acc:HGNC:1726]	no	no	no	no
ENSG00000101236	2051.07	-0.0741221	0.132117	-0.561035	0.574774	0.760552	20	RNF24	3927309	4015558	ring finger protein 24 [Source:HGNC Symbol;Acc:HGNC:13779]	no	no	no	no
ENSG00000101246	1594.56	-0.160924	0.118387	-1.3593	0.17405	0.37805	20	ARFRP1	63698642	63708025	ADP ribosylation factor related protein 1 [Source:HGNC Symbol;Acc:HGNC:662]	no	no	no	no
ENSG00000101247	390.511	-0.143651	0.0925521	-1.55211	0.120636	0.296051	20	NDUFAF5	13785007	13821580	NADH:ubiquinone oxidoreductase complex assembly factor 5 [Source:HGNC Symbol;Acc:HGNC:15899]	no	no	no	no
ENSG00000101255	2047.2	0.665556	0.309507	2.15038	0.0315254	0.114852	20	TRIB3	362835	397559	tribbles pseudokinase 3 [Source:HGNC Symbol;Acc:HGNC:16228]	no	no	no	no
ENSG00000101265	579.334	-0.105241	0.332852	-0.316179	0.751866	0.870888	20	RASSF2	4780023	4823608	Ras association domain family member 2 [Source:HGNC Symbol;Acc:HGNC:9883]	no	no	no	no
ENSG00000101266	4549.46	0.0183465	0.140268	0.130796	0.895937	0.949975	20	CSNK2A1	472498	543835	casein kinase 2 alpha 1 [Source:HGNC Symbol;Acc:HGNC:2457]	no	no	no	no
ENSG00000101290	1847.75	-0.409757	0.195027	-2.10103	0.0356387	0.126308	20	CDS2	5126879	5197887	CDP-diacylglycerol synthase 2 [Source:HGNC Symbol;Acc:HGNC:1801]	no	no	no	no
ENSG00000101294	8662.83	-0.190175	0.160071	-1.18806	0.234808	0.45758	20	HM13	31514410	31577923	histocompatibility minor 13 [Source:HGNC Symbol;Acc:HGNC:16435]	no	no	no	no
ENSG00000101298	709.861	0.0153551	0.0923723	0.166231	0.867975	0.933467	20	SNPH	1266280	1309328	syntaphilin [Source:HGNC Symbol;Acc:HGNC:15931]	no	no	no	no
ENSG00000101310	1926.2	-0.239901	0.190361	-1.26024	0.207583	0.425107	20	SEC23B	18507520	18561415	SEC23 homolog B, COPII coat complex component [Source:HGNC Symbol;Acc:HGNC:10702]	no	no	no	no
ENSG00000101311	221.685	0.254253	0.216201	1.176	0.239594	0.463833	20	FERMT1	6074845	6123214	FERM domain containing kindlin 1 [Source:HGNC Symbol;Acc:HGNC:15889]	no	no	no	no
ENSG00000101333	1258.14	-0.539188	0.2602	-2.0722	0.0382464	0.132958	20	PLCB4	9067825	9504593	phospholipase C beta 4 [Source:HGNC Symbol;Acc:HGNC:9059]	no	no	no	no
ENSG00000101335	55812.7	-0.36126	0.23616	-1.52973	0.126084	0.304497	20	MYL9	36541497	36551447	myosin light chain 9 [Source:HGNC Symbol;Acc:HGNC:15754]	no	no	no	no
ENSG00000101337	4638.24	0.011132	0.109904	0.101289	0.919321	0.961976	20	TM9SF4	32109714	32167258	transmembrane 9 superfamily member 4 [Source:HGNC Symbol;Acc:HGNC:30797]	no	no	no	no
ENSG00000101343	1439.24	0.0358403	0.159403	0.22484	0.822103	0.907553	20	CRNKL1	20034368	20056046	crooked neck pre-mRNA splicing factor 1 [Source:HGNC Symbol;Acc:HGNC:15762]	no	no	no	no
ENSG00000101346	4604.18	-0.251047	0.143713	-1.74686	0.0806622	0.228064	20	POFUT1	32207855	32238658	protein O-fucosyltransferase 1 [Source:HGNC Symbol;Acc:HGNC:14988]	no	no	no	no
ENSG00000101347	1342.77	0.412249	0.209762	1.96532	0.0493778	0.159702	20	SAMHD1	36890229	36951893	SAM and HD domain containing deoxynucleoside triphosphate triphosphohydrolase 1 [Source:HGNC Symbol;Acc:HGNC:15925]	no	no	no	no
ENSG00000101350	3493.44	-0.135279	0.109852	-1.23146	0.21815	0.437829	20	KIF3B	32277651	32335011	kinesin family member 3B [Source:HGNC Symbol;Acc:HGNC:6320]	no	no	no	no
ENSG00000101361	3872.19	-0.179978	0.171523	-1.0493	0.294042	0.524308	20	NOP56	2652593	2658393	NOP56 ribonucleoprotein [Source:HGNC Symbol;Acc:HGNC:15911]	no	no	no	no
ENSG00000101363	1955.94	0.02566	0.118136	0.217208	0.828046	0.91083	20	MANBAL	37289649	37317260	mannosidase beta like [Source:HGNC Symbol;Acc:HGNC:15799]	no	no	no	no
ENSG00000101365	1931.81	-0.0611195	0.147978	-0.41303	0.679584	0.827337	20	IDH3B	2658395	2664219	isocitrate dehydrogenase (NAD(+)) 3 non-catalytic subunit beta [Source:HGNC Symbol;Acc:HGNC:5385]	no	no	no	no
ENSG00000101367	6547.68	-0.111054	0.202402	-0.548683	0.583223	0.766261	20	MAPRE1	32819954	32850405	microtubule associated protein RP/EB family member 1 [Source:HGNC Symbol;Acc:HGNC:6890]	no	no	no	no
ENSG00000101384	7771.02	0.601528	0.585944	1.0266	0.304611	0.534825	20	JAG1	10637684	10673999	jagged canonical Notch ligand 1 [Source:HGNC Symbol;Acc:HGNC:6188]	no	no	no	no
ENSG00000101391	815.552	-0.155766	0.121048	-1.28681	0.198159	0.412081	20	CDK5RAP1	33358839	33401561	CDK5 regulatory subunit associated protein 1 [Source:HGNC Symbol;Acc:HGNC:15880]	no	no	no	no
ENSG00000101400	1321.62	-0.313134	0.122135	-2.56383	0.0103523	0.0488323	20	SNTA1	33407957	33443763	syntrophin alpha 1 [Source:HGNC Symbol;Acc:HGNC:11167]	no	no	no	no
ENSG00000101407	841.45	-0.208475	0.162917	-1.27964	0.200673	0.415676	20	TTI1	37983007	38033461	TELO2 interacting protein 1 [Source:HGNC Symbol;Acc:HGNC:29029]	no	no	no	no
ENSG00000101412	615.005	-0.768131	0.278387	-2.75922	0.005794	0.0309436	20	E2F1	33675477	33686385	E2F transcription factor 1 [Source:HGNC Symbol;Acc:HGNC:3113]	no	no	no	no
ENSG00000101413	1109.03	-0.283846	0.125583	-2.26022	0.0238077	0.0922344	20	RPRD1B	38033725	38127780	regulation of nuclear pre-mRNA domain containing 1B [Source:HGNC Symbol;Acc:HGNC:16209]	no	no	no	no
ENSG00000101417	410.975	-0.453708	0.0971358	-4.67086	2.99941e-06	4.66378e-05	20	PXMP4	33702758	33720319	peroxisomal membrane protein 4 [Source:HGNC Symbol;Acc:HGNC:15920]	no	no	no	no
ENSG00000101421	4370.21	0.129733	0.126856	1.02267	0.306462	0.537216	20	CHMP4B	33811348	33854366	charged multivesicular body protein 4B [Source:HGNC Symbol;Acc:HGNC:16171]	no	no	no	no
ENSG00000101439	7269.86	-0.391172	0.17052	-2.29399	0.0217909	0.0861813	20	CST3	23626706	23638473	cystatin C [Source:HGNC Symbol;Acc:HGNC:2475]	no	no	no	no
ENSG00000101442	278.15	0.259125	0.117369	2.20779	0.0272592	0.102309	20	ACTR5	38748460	38772520	actin related protein 5 [Source:HGNC Symbol;Acc:HGNC:14671]	no	no	no	no
ENSG00000101444	3352.03	0.0419459	0.110534	0.379483	0.70433	0.842095	20	AHCY	34280268	34311802	adenosylhomocysteinase [Source:HGNC Symbol;Acc:HGNC:343]	no	no	no	no
ENSG00000101447	798.633	-0.224616	0.284024	-0.790833	0.429042	0.652104	20	FAM83D	38926312	38953106	family with sequence similarity 83 member D [Source:HGNC Symbol;Acc:HGNC:16122]	no	no	no	no
ENSG00000101452	606.164	0.00870857	0.141154	0.0616955	0.950805	0.977818	20	DHX35	38962299	39039723	DEAH-box helicase 35 [Source:HGNC Symbol;Acc:HGNC:15861]	no	no	no	no
ENSG00000101457	1008.52	0.314496	0.122851	2.55997	0.0104682	0.0492308	20	DNTTIP1	45791954	45811427	deoxynucleotidyltransferase terminal interacting protein 1 [Source:HGNC Symbol;Acc:HGNC:16160]	no	no	no	no
ENSG00000101460	765.341	-0.380357	0.2041	-1.86358	0.0623802	0.189471	20	MAP1LC3A	34546854	34560345	microtubule associated protein 1 light chain 3 alpha [Source:HGNC Symbol;Acc:HGNC:6838]	no	no	no	no
ENSG00000101463	302.305	-0.827632	0.161298	-5.13108	2.88077e-07	5.72244e-06	20	SYNDIG1	24469629	24666616	synapse differentiation inducing 1 [Source:HGNC Symbol;Acc:HGNC:15885]	no	no	no	no
ENSG00000101464	641.498	-0.302438	0.157669	-1.91819	0.0550872	0.173026	20	PIGU	34560542	34698790	phosphatidylinositol glycan anchor biosynthesis class U [Source:HGNC Symbol;Acc:HGNC:15791]	no	no	no	no
ENSG00000101473	523.696	-0.0730853	0.142693	-0.512187	0.60852	0.782332	20	ACOT8	45841721	45857405	acyl-CoA thioesterase 8 [Source:HGNC Symbol;Acc:HGNC:15919]	no	no	no	no
ENSG00000101474	5703.4	-0.204687	0.145718	-1.40468	0.160117	0.357716	20	APMAP	24962925	24992751	adipocyte plasma membrane associated protein [Source:HGNC Symbol;Acc:HGNC:13238]	no	no	no	no
ENSG00000101493	1347.29	0.471745	0.160825	2.93328	0.003354	0.0199297	18	ZNF516	76357682	76495242	zinc finger protein 516 [Source:HGNC Symbol;Acc:HGNC:28990]	no	no	no	no
ENSG00000101544	1042.65	-0.191803	0.153942	-1.24595	0.212783	0.430933	18	ADNP2	80109262	80147523	ADNP homeobox 2 [Source:HGNC Symbol;Acc:HGNC:23803]	no	no	no	no
ENSG00000101546	532.636	-0.0408004	0.108225	-0.376995	0.706177	0.843034	18	RBFA	80034389	80050651	ribosome binding factor A [Source:HGNC Symbol;Acc:HGNC:26120]	no	no	no	no
ENSG00000101557	4550.85	-0.263391	0.164636	-1.59983	0.109636	0.278692	18	USP14	158383	214629	ubiquitin specific peptidase 14 [Source:HGNC Symbol;Acc:HGNC:12612]	no	no	no	no
ENSG00000101558	5221.08	-0.156594	0.170943	-0.916058	0.359637	0.590796	18	VAPA	9914016	9960021	VAMP associated protein A [Source:HGNC Symbol;Acc:HGNC:12648]	no	no	no	no
ENSG00000101574	549.923	-0.234065	0.187621	-1.24754	0.2122	0.43048	18	METTL4	2537525	2571509	methyltransferase 4, N6-adenosine [Source:HGNC Symbol;Acc:HGNC:24726]	no	no	no	no
ENSG00000101577	2301.72	-0.27287	0.179126	-1.52334	0.127675	0.307344	18	LPIN2	2885296	3013144	lipin 2 [Source:HGNC Symbol;Acc:HGNC:14450]	no	no	no	no
ENSG00000101596	2782.82	-0.217458	0.168282	-1.29223	0.196278	0.40934	18	SMCHD1	2655726	2805017	structural maintenance of chromosomes flexible hinge domain containing 1 [Source:HGNC Symbol;Acc:HGNC:29090]	no	no	no	no
ENSG00000101605	52.0129	1.47955	0.375328	3.94203	8.0795e-05	0.000858121	18	MYOM1	3066807	3219968	myomesin 1 [Source:HGNC Symbol;Acc:HGNC:7613]	no	no	no	no
ENSG00000101608	15688.6	-0.0486597	0.134225	-0.362522	0.716962	0.849365	18	MYL12A	3247481	3256236	myosin light chain 12A [Source:HGNC Symbol;Acc:HGNC:16701]	no	no	no	no
ENSG00000101624	250.794	-0.0125483	0.201056	-0.0624117	0.950235	0.977812	18	CEP76	12661833	12702777	centrosomal protein 76 [Source:HGNC Symbol;Acc:HGNC:25727]	no	no	no	no
ENSG00000101638	21.023	2.23013	1.08689	2.05185	0.0401843	0.137354	18	ST8SIA5	46667821	46759257	ST8 alpha-N-acetyl-neuraminide alpha-2,8-sialyltransferase 5 [Source:HGNC Symbol;Acc:HGNC:17827]	no	no	no	no
ENSG00000101639	1414.07	-0.230502	0.159123	-1.44858	0.147456	0.339926	18	CEP192	12991362	13125052	centrosomal protein 192 [Source:HGNC Symbol;Acc:HGNC:25515]	no	no	no	no
ENSG00000101654	2048.24	0.136689	0.0789794	1.73069	0.0835072	0.233006	18	RNMT	13726660	13764556	RNA guanine-7 methyltransferase [Source:HGNC Symbol;Acc:HGNC:10075]	no	no	no	no
ENSG00000101665	2860.46	-0.290998	0.215017	-1.35337	0.175937	0.380787	18	SMAD7	48919853	48950965	SMAD family member 7 [Source:HGNC Symbol;Acc:HGNC:6773]	no	no	no	no
ENSG00000101670	231.779	6.40017	0.741441	8.63206	6.02542e-18	6.66847e-16	18	LIPG	49560699	49599185	lipase G, endothelial type [Source:HGNC Symbol;Acc:HGNC:6623]	no	no	no	no
ENSG00000101680	289.924	-0.872414	0.270493	-3.22528	0.00125851	0.00888507	18	LAMA1	6941742	7117797	laminin subunit alpha 1 [Source:HGNC Symbol;Acc:HGNC:6481]	no	no	no	no
ENSG00000101745	2469.33	-0.288901	0.187803	-1.53832	0.123971	0.301291	18	ANKRD12	9136228	9285985	ankyrin repeat domain 12 [Source:HGNC Symbol;Acc:HGNC:29135]	no	no	no	no
ENSG00000101751	1240.55	0.0156979	0.173085	0.0906949	0.927735	0.966161	18	POLI	54269517	54321266	DNA polymerase iota [Source:HGNC Symbol;Acc:HGNC:9182]	no	no	no	no
ENSG00000101752	2747.65	0.14755	0.134666	1.09568	0.27322	0.502558	18	MIB1	21704957	21870953	MIB E3 ubiquitin protein ligase 1 [Source:HGNC Symbol;Acc:HGNC:21086]	no	no	no	no
ENSG00000101773	1205.3	-0.673726	0.195015	-3.45474	0.000550826	0.00445054	18	RBBP8	22798261	23026488	RB binding protein 8, endonuclease [Source:HGNC Symbol;Acc:HGNC:9891]	no	no	no	no
ENSG00000101782	3105.81	-0.228131	0.12085	-1.88772	0.0590629	0.182296	18	RIOK3	23453287	23486603	RIO kinase 3 [Source:HGNC Symbol;Acc:HGNC:11451]	no	no	no	no
ENSG00000101811	761.744	-0.278113	0.186455	-1.49158	0.135809	0.321186	X	CSTF2	100820391	100841520	cleavage stimulation factor subunit 2 [Source:HGNC Symbol;Acc:HGNC:2484]	no	no	no	yes
ENSG00000101825	24262.2	-0.635857	0.309186	-2.05656	0.039729	0.136329	X	MXRA5	3308565	3346652	matrix remodeling associated 5 [Source:HGNC Symbol;Acc:HGNC:7539]	no	yes	no	no
ENSG00000101843	1605.35	-0.0577679	0.125103	-0.461761	0.644253	0.806005	X	PSMD10	108084207	108091549	proteasome 26S subunit, non-ATPase 10 [Source:HGNC Symbol;Acc:HGNC:9555]	no	no	no	yes
ENSG00000101844	474.55	-0.169928	0.133696	-1.271	0.203728	0.420259	X	ATG4A	108091668	108154671	autophagy related 4A cysteine peptidase [Source:HGNC Symbol;Acc:HGNC:16489]	no	no	no	yes
ENSG00000101846	1390.45	-1.01338	0.124854	-8.11652	4.79729e-16	3.92424e-14	X	STS	7147237	7804358	steroid sulfatase [Source:HGNC Symbol;Acc:HGNC:11425]	no	yes	no	no
ENSG00000101849	2056.73	-0.1235	0.168867	-0.731343	0.46457	0.67982	X	TBL1X	9463320	9741037	transducin beta like 1 X-linked [Source:HGNC Symbol;Acc:HGNC:11585]	no	no	yes	no
ENSG00000101856	7264.28	-0.177613	0.200025	-0.887955	0.374565	0.604241	X	PGRMC1	119236245	119244466	progesterone receptor membrane component 1 [Source:HGNC Symbol;Acc:HGNC:16090]	no	no	no	yes
ENSG00000101868	779.043	-0.602966	0.190609	-3.16336	0.00155957	0.0106288	X	POLA1	24693873	24996986	DNA polymerase alpha 1, catalytic subunit [Source:HGNC Symbol;Acc:HGNC:9173]	no	no	no	yes
ENSG00000101871	878.488	-0.967909	0.245938	-3.93558	8.2995e-05	0.000879359	X	MID1	10445310	10833654	midline 1 [Source:HGNC Symbol;Acc:HGNC:7095]	no	no	no	yes
ENSG00000101882	603.442	-0.0395563	0.196715	-0.201085	0.840632	0.918309	X	NKAP	119920672	119943751	NFKB activating protein [Source:HGNC Symbol;Acc:HGNC:29873]	no	no	no	yes
ENSG00000101888	394.413	-0.142016	0.177094	-0.801924	0.422597	0.646853	X	NXT2	109535781	109544698	nuclear transport factor 2 like export factor 2 [Source:HGNC Symbol;Acc:HGNC:18151]	no	no	no	yes
ENSG00000101901	1246.15	0.0822481	0.11617	0.707995	0.478949	0.69072	X	ALG13	111665811	111760649	ALG13 UDP-N-acetylglucosaminyltransferase subunit [Source:HGNC Symbol;Acc:HGNC:30881]	no	no	yes	no
ENSG00000101911	727.954	-0.362547	0.175121	-2.07027	0.038427	0.133264	X	PRPS2	12791355	12824222	phosphoribosyl pyrophosphate synthetase 2 [Source:HGNC Symbol;Acc:HGNC:9465]	no	no	no	yes
ENSG00000101928	672.443	-0.0793227	0.172814	-0.459006	0.64623	0.807404	X	MOSPD1	134887632	134915257	motile sperm domain containing 1 [Source:HGNC Symbol;Acc:HGNC:25235]	no	no	no	yes
ENSG00000101935	879.825	0.108123	0.178296	0.606424	0.544233	0.739442	X	AMMECR1	110194186	110440318	AMMECR nuclear protein 1 [Source:HGNC Symbol;Acc:HGNC:467]	no	no	no	yes
ENSG00000101938	105.93	-1.01661	0.666175	-1.52603	0.127002	0.306227	X	CHRDL1	110673856	110795819	chordin like 1 [Source:HGNC Symbol;Acc:HGNC:29861]	no	no	no	yes
ENSG00000101940	2114.26	0.0723655	0.142515	0.507773	0.611612	0.784231	X	WDR13	48590042	48608869	WD repeat domain 13 [Source:HGNC Symbol;Acc:HGNC:14352]	no	no	no	yes
ENSG00000101945	283.344	-0.151151	0.240252	-0.629137	0.52926	0.72805	X	SUV39H1	48695554	48709016	SUV39H1 histone lysine methyltransferase [Source:HGNC Symbol;Acc:HGNC:11479]	no	no	no	yes
ENSG00000101955	3336.25	-0.0553909	0.180023	-0.307688	0.758319	0.874002	X	SRPX	38149336	38220924	sushi repeat containing protein X-linked [Source:HGNC Symbol;Acc:HGNC:11309]	no	no	yes	no
ENSG00000101966	2942.24	0.00243836	0.114189	0.0213537	0.982964	0.990636	X	XIAP	123859712	123913972	X-linked inhibitor of apoptosis [Source:HGNC Symbol;Acc:HGNC:592]	no	no	no	yes
ENSG00000101972	4145.48	-0.131582	0.15963	-0.824294	0.409772	0.635654	X	STAG2	123960212	124422664	stromal antigen 2 [Source:HGNC Symbol;Acc:HGNC:11355]	no	no	no	yes
ENSG00000101974	3325.71	-0.274813	0.206567	-1.33038	0.183393	0.391654	X	ATP11C	139726346	139945276	ATPase phospholipid transporting 11C [Source:HGNC Symbol;Acc:HGNC:13554]	no	no	no	yes
ENSG00000101986	855.337	-0.33004	0.181597	-1.81742	0.0691522	0.20383	X	ABCD1	153724856	153744755	ATP binding cassette subfamily D member 1 [Source:HGNC Symbol;Acc:HGNC:61]	no	no	no	yes
ENSG00000101997	528.259	-0.329899	0.142708	-2.31172	0.0207933	0.0833124	X	CCDC22	49235470	49250520	coiled-coil domain containing 22 [Source:HGNC Symbol;Acc:HGNC:28909]	no	no	no	yes
ENSG00000102007	3538.61	0.247729	0.158054	1.56737	0.117028	0.290077	X	PLP2	49171898	49175235	proteolipid protein 2 [Source:HGNC Symbol;Acc:HGNC:9087]	no	no	no	yes
ENSG00000102024	17459.6	-0.212795	0.184834	-1.15128	0.249619	0.475275	X	PLS3	115561174	115650861	plastin 3 [Source:HGNC Symbol;Acc:HGNC:9091]	no	no	yes	no
ENSG00000102030	877.212	-0.0983987	0.133919	-0.734761	0.462485	0.678253	X	NAA10	153929225	153935080	N-alpha-acetyltransferase 10, NatA catalytic subunit [Source:HGNC Symbol;Acc:HGNC:18704]	no	no	yes	no
ENSG00000102032	160.981	-2.22266	0.357618	-6.21519	5.12631e-10	1.76275e-08	X	RENBP	153935269	153944687	renin binding protein [Source:HGNC Symbol;Acc:HGNC:9959]	no	yes	no	no
ENSG00000102034	2438.09	0.0456666	0.0882782	0.517303	0.604945	0.779638	X	ELF4	130063955	130110716	E74 like ETS transcription factor 4 [Source:HGNC Symbol;Acc:HGNC:3319]	no	no	no	yes
ENSG00000102038	5642.66	0.235423	0.144472	1.62954	0.103199	0.268021	X	SMARCA1	129446501	129523500	SWI/SNF related, matrix associated, actin dependent regulator of chromatin, subfamily a, member 1 [Source:HGNC Symbol;Acc:HGNC:11097]	no	no	no	yes
ENSG00000102053	87.9986	-0.15135	0.300676	-0.503366	0.614707	0.785783	X	ZC3H12B	65034788	65507887	zinc finger CCCH-type containing 12B [Source:HGNC Symbol;Acc:HGNC:17407]	no	no	no	yes
ENSG00000102054	4127.51	-0.0686927	0.162781	-0.421995	0.673029	0.822522	X	RBBP7	16839283	16870362	RB binding protein 7, chromatin remodeling factor [Source:HGNC Symbol;Acc:HGNC:9890]	no	no	yes	no
ENSG00000102057	290.674	1.27453	0.228129	5.58686	2.31216e-08	5.64596e-07	X	KCND1	48961378	48971844	potassium voltage-gated channel subfamily D member 1 [Source:HGNC Symbol;Acc:HGNC:6237]	no	no	no	yes
ENSG00000102078	335.519	0.226295	0.0980112	2.30886	0.0209511	0.0837409	X	SLC25A14	130339888	130373361	solute carrier family 25 member 14 [Source:HGNC Symbol;Acc:HGNC:10984]	no	no	no	yes
ENSG00000102081	1549.4	0.147262	0.169489	0.868861	0.384923	0.613536	X	FMR1	147911919	147951125	fragile X messenger ribonucleoprotein 1 [Source:HGNC Symbol;Acc:HGNC:3775]	no	no	no	yes
ENSG00000102096	127.148	0.0462227	0.169918	0.272029	0.785599	0.887717	X	PIM2	48913182	48919024	Pim-2 proto-oncogene, serine/threonine kinase [Source:HGNC Symbol;Acc:HGNC:8987]	no	no	no	yes
ENSG00000102098	127.605	-0.0891689	0.198085	-0.450154	0.652599	0.810731	X	SCML2	18239313	18354688	Scm polycomb group protein like 2 [Source:HGNC Symbol;Acc:HGNC:10581]	no	no	no	yes
ENSG00000102100	1439.85	-0.127	0.164796	-0.770651	0.440914	0.661071	X	SLC35A2	48903180	48911958	solute carrier family 35 member A2 [Source:HGNC Symbol;Acc:HGNC:11022]	no	no	no	yes
ENSG00000102103	937.118	-0.0753706	0.133522	-0.56448	0.572428	0.759431	X	PQBP1	48890197	48903402	polyglutamine binding protein 1 [Source:HGNC Symbol;Acc:HGNC:9330]	no	no	yes	no
ENSG00000102119	2621.3	0.0552587	0.114427	0.482917	0.629155	0.796192	X	EMD	154379273	154381574	emerin [Source:HGNC Symbol;Acc:HGNC:3331]	no	no	no	no
ENSG00000102125	922.458	-0.155873	0.191484	-0.814023	0.415632	0.640304	X	TAFAZZIN	154411524	154421726	tafazzin, phospholipid-lysophospholipid transacylase [Source:HGNC Symbol;Acc:HGNC:11577]	no	no	no	yes
ENSG00000102144	29140.3	0.64445	0.149567	4.30877	1.64165e-05	0.00020618	X	PGK1	77910739	78129295	phosphoglycerate kinase 1 [Source:HGNC Symbol;Acc:HGNC:8896]	no	no	no	yes
ENSG00000102158	3816.41	-0.226233	0.133071	-1.7001	0.0891128	0.242733	X	MAGT1	77825747	77899271	magnesium transporter 1 [Source:HGNC Symbol;Acc:HGNC:28880]	no	no	no	yes
ENSG00000102172	6249.93	0.250084	0.19088	1.31016	0.190142	0.400603	X	SMS	21940709	21994837	spermine synthase [Source:HGNC Symbol;Acc:HGNC:11123]	no	no	no	yes
ENSG00000102174	70.2087	2.05757	0.359977	5.71584	1.09161e-08	2.88686e-07	X	PHEX	22032325	22494713	phosphate regulating endopeptidase X-linked [Source:HGNC Symbol;Acc:HGNC:8918]	no	no	yes	no
ENSG00000102178	1427.28	-0.211082	0.116591	-1.81045	0.0702262	0.206032	X	UBL4A	154483717	154486615	ubiquitin like 4A [Source:HGNC Symbol;Acc:HGNC:12505]	no	no	no	yes
ENSG00000102181	4513.91	-0.339572	0.136573	-2.48638	0.0129049	0.0577693	X	CD99L2	150766336	150898816	CD99 molecule like 2 [Source:HGNC Symbol;Acc:HGNC:18237]	no	no	no	yes
ENSG00000102189	3768.34	-0.111245	0.139606	-0.796846	0.42554	0.649576	12	EEA1	92770637	92929331	early endosome antigen 1 [Source:HGNC Symbol;Acc:HGNC:3185]	no	no	no	no
ENSG00000102218	1465.78	-0.407159	0.123292	-3.3024	0.000958626	0.0070416	X	RP2	46837043	46882358	RP2 activator of ARL3 GTPase [Source:HGNC Symbol;Acc:HGNC:10274]	no	no	no	yes
ENSG00000102221	521.684	0.130958	0.239818	0.546072	0.585016	0.767397	X	JADE3	46912276	47061242	jade family PHD finger 3 [Source:HGNC Symbol;Acc:HGNC:22982]	no	no	no	yes
ENSG00000102225	5012.22	0.110247	0.158484	0.695635	0.486658	0.696888	X	CDK16	47217860	47229997	cyclin dependent kinase 16 [Source:HGNC Symbol;Acc:HGNC:8749]	no	yes	no	no
[truncated: 11,155 more rows]

## Sheet: iPSCs
ensembl_gene_id	baseMean	log2FoldChange	lfcSE	stat	pvalue	padj	chromosome_name	hgnc_symbol	start_position	end_position	description	isPAR	escape_Tukianien	variable_Tukianien	inactive_Tukianien
ENSG00000000003	2753.51	-0.522651	0.0828689	-6.30696	2.84561e-10	2.61663e-09	X	TSPAN6	100627108	100639991	tetraspanin 6 [Source:HGNC Symbol;Acc:HGNC:11858]	no	no	yes	no
ENSG00000000419	2163.28	-0.324678	0.0731172	-4.44051	8.97444e-06	3.66241e-05	20	DPM1	50934867	50959140	dolichyl-phosphate mannosyltransferase subunit 1, catalytic [Source:HGNC Symbol;Acc:HGNC:3005]	no	no	no	no
ENSG00000000457	317.889	0.0288571	0.0795327	0.362833	0.71673	0.77242	1	SCYL3	169849631	169894267	SCY1 like pseudokinase 3 [Source:HGNC Symbol;Acc:HGNC:19285]	no	no	no	no
ENSG00000000460	917.486	-0.167984	0.0578848	-2.90203	0.00370748	0.00830912	1	C1orf112	169662007	169854080	chromosome 1 open reading frame 112 [Source:HGNC Symbol;Acc:HGNC:25565]	no	no	no	no
ENSG00000001036	1832.79	0.111882	0.0602559	1.85677	0.0633433	0.0999932	6	FUCA2	143494812	143511720	alpha-L-fucosidase 2 [Source:HGNC Symbol;Acc:HGNC:4008]	no	no	no	no
ENSG00000001084	2062.14	-0.310701	0.064309	-4.83138	1.35587e-06	6.51061e-06	6	GCLC	53497341	53616970	glutamate-cysteine ligase catalytic subunit [Source:HGNC Symbol;Acc:HGNC:4311]	no	no	no	no
ENSG00000001167	2231.64	0.0457387	0.0415855	1.09987	0.271388	0.349035	6	NFYA	41072974	41102403	nuclear transcription factor Y subunit alpha [Source:HGNC Symbol;Acc:HGNC:7804]	no	no	no	no
ENSG00000001460	559.633	0.162936	0.0584669	2.78682	0.00532287	0.0114251	1	STPG1	24356999	24416934	sperm tail PG-rich repeat containing 1 [Source:HGNC Symbol;Acc:HGNC:28070]	no	no	no	no
ENSG00000001461	641.719	0.0608906	0.060974	0.998633	0.317972	0.399177	1	NIPAL3	24415802	24472976	NIPA like domain containing 3 [Source:HGNC Symbol;Acc:HGNC:25233]	no	no	no	no
ENSG00000001497	4543.82	-0.0671311	0.0536717	-1.25077	0.211017	0.281714	X	LAS1L	65438549	65534810	LAS1 like ribosome biogenesis factor [Source:HGNC Symbol;Acc:HGNC:25726]	no	no	no	yes
ENSG00000001561	317.251	0.203295	0.111404	1.82486	0.0680228	0.106423	6	ENPP4	46129989	46146688	ectonucleotide pyrophosphatase/phosphodiesterase 4 [Source:HGNC Symbol;Acc:HGNC:3359]	no	no	no	no
ENSG00000001617	3154.68	0.0975351	0.0621614	1.56906	0.116633	0.16995	3	SEMA3F	50155045	50189075	semaphorin 3F [Source:HGNC Symbol;Acc:HGNC:10728]	no	no	no	no
ENSG00000001629	3291.15	0.0751766	0.0561411	1.33907	0.180549	0.247136	7	ANKIB1	92245974	92401383	ankyrin repeat and IBR domain containing 1 [Source:HGNC Symbol;Acc:HGNC:22215]	no	no	no	no
ENSG00000001630	136.143	0.292766	0.132699	2.20624	0.0273672	0.0483461	7	CYP51A1	92084987	92134803	cytochrome P450 family 51 subfamily A member 1 [Source:HGNC Symbol;Acc:HGNC:2649]	no	no	no	no
ENSG00000001631	322.252	-0.0837975	0.0942739	-0.888873	0.374071	0.457144	7	KRIT1	92197498	92246166	KRIT1 ankyrin repeat containing [Source:HGNC Symbol;Acc:HGNC:1573]	no	no	no	no
ENSG00000002016	711.289	0.26883	0.0886673	3.0319	0.00243022	0.00572151	12	RAD52	911736	990053	RAD52 homolog, DNA repair protein [Source:HGNC Symbol;Acc:HGNC:9824]	no	no	no	no
ENSG00000002330	128.741	-0.193439	0.112133	-1.72509	0.084512	0.128779	11	BAD	64269830	64284704	BCL2 associated agonist of cell death [Source:HGNC Symbol;Acc:HGNC:936]	no	no	no	no
ENSG00000002549	2484.16	-0.475282	0.0428786	-11.0844	1.49379e-28	1.0822e-26	4	LAP3	17577198	17607972	leucine aminopeptidase 3 [Source:HGNC Symbol;Acc:HGNC:18449]	no	no	no	no
ENSG00000002586	1415.85	0.382523	0.0640444	5.97278	2.33246e-09	1.85157e-08	X	CD99	2691187	2741309	CD99 molecule (Xg blood group) [Source:HGNC Symbol;Acc:HGNC:7082]	PAR1	no	no	no
ENSG00000002587	68.0571	1.08954	0.178662	6.09834	1.07178e-09	8.99111e-09	4	HS3ST1	11393150	11429564	heparan sulfate-glucosamine 3-sulfotransferase 1 [Source:HGNC Symbol;Acc:HGNC:5194]	no	no	no	no
ENSG00000002746	294.519	0.152013	0.0771392	1.97063	0.0487659	0.0796087	7	HECW1	43112629	43566001	HECT, C2 and WW domain containing E3 ubiquitin protein ligase 1 [Source:HGNC Symbol;Acc:HGNC:22195]	no	no	no	no
ENSG00000002834	10851	-0.270941	0.0403205	-6.71968	1.82122e-11	2.02231e-10	17	LASP1	38869859	38921770	LIM and SH3 protein 1 [Source:HGNC Symbol;Acc:HGNC:6513]	no	no	no	no
ENSG00000002919	747.397	-0.267379	0.0696022	-3.84153	0.00012227	0.000391076	17	SNX11	48103357	48123601	sorting nexin 11 [Source:HGNC Symbol;Acc:HGNC:14975]	no	no	no	no
ENSG00000003056	2598.83	-0.279764	0.0487364	-5.74034	9.44863e-09	6.78919e-08	12	M6PR	8940361	8949761	mannose-6-phosphate receptor, cation dependent [Source:HGNC Symbol;Acc:HGNC:6752]	no	no	no	no
ENSG00000003096	457.523	-0.142558	0.0539249	-2.64365	0.00820179	0.0167241	X	KLHL13	117897813	118117340	kelch like family member 13 [Source:HGNC Symbol;Acc:HGNC:22931]	no	no	no	yes
ENSG00000003147	1366.03	0.162439	0.0568663	2.8565	0.00428339	0.00944104	7	ICA1	8113184	8262687	islet cell autoantigen 1 [Source:HGNC Symbol;Acc:HGNC:5343]	no	no	no	no
ENSG00000003249	2218.01	-0.0217275	0.0810329	-0.268132	0.788597	0.833088	16	DBNDD1	90004871	90019890	dysbindin domain containing 1 [Source:HGNC Symbol;Acc:HGNC:28455]	no	no	no	no
ENSG00000003393	3192.98	-0.160706	0.054881	-2.92826	0.00340868	0.00770739	2	ALS2	201700267	201782112	alsin Rho guanine nucleotide exchange factor ALS2 [Source:HGNC Symbol;Acc:HGNC:443]	no	no	no	no
ENSG00000003400	134.577	-0.0936675	0.0929523	-1.00769	0.313602	0.394479	2	CASP10	201182872	201229428	caspase 10 [Source:HGNC Symbol;Acc:HGNC:1500]	no	no	no	no
ENSG00000003402	614.932	0.0247247	0.0633261	0.390435	0.696215	0.754945	2	CFLAR	201116154	201176687	CASP8 and FADD like apoptosis regulator [Source:HGNC Symbol;Acc:HGNC:1876]	no	no	no	no
ENSG00000003436	155.09	1.5575	0.142878	10.9009	1.14088e-27	7.61024e-26	2	TFPI	187464230	187565760	tissue factor pathway inhibitor [Source:HGNC Symbol;Acc:HGNC:11760]	no	no	no	no
ENSG00000003509	1602.2	-0.0607104	0.0689206	-0.880874	0.378386	0.461246	2	NDUFAF7	37231631	37253403	NADH:ubiquinone oxidoreductase complex assembly factor 7 [Source:HGNC Symbol;Acc:HGNC:28816]	no	no	no	no
ENSG00000003756	3304.24	0.254831	0.0714471	3.56671	0.00036149	0.00103988	3	RBM5	50088919	50119021	RNA binding motif protein 5 [Source:HGNC Symbol;Acc:HGNC:9902]	no	no	no	no
ENSG00000003987	408.595	0.257466	0.065497	3.93096	8.46082e-05	0.000280349	8	MTMR7	17296794	17413528	myotubularin related protein 7 [Source:HGNC Symbol;Acc:HGNC:7454]	no	no	no	no
ENSG00000003989	1657.11	-0.200594	0.0814292	-2.46341	0.0137622	0.0264332	8	SLC7A2	17497088	17570573	solute carrier family 7 member 2 [Source:HGNC Symbol;Acc:HGNC:11060]	no	no	no	no
ENSG00000004059	2812.89	-0.0970122	0.0641387	-1.51254	0.130397	0.187245	7	ARF5	127588386	127591700	ADP ribosylation factor 5 [Source:HGNC Symbol;Acc:HGNC:658]	no	no	no	no
ENSG00000004139	123.412	-0.0781795	0.103824	-0.752998	0.451451	0.533238	17	SARM1	28364356	28404049	sterile alpha and TIR motif containing 1 [Source:HGNC Symbol;Acc:HGNC:17074]	no	no	no	no
ENSG00000004142	3562.77	-0.320649	0.0477587	-6.71394	1.89441e-11	2.09734e-10	17	POLDIP2	28346633	28357527	DNA polymerase delta interacting protein 2 [Source:HGNC Symbol;Acc:HGNC:23781]	no	no	no	no
ENSG00000004399	3617.38	0.229311	0.064752	3.54137	0.000398048	0.00113173	3	PLXND1	129555214	129606676	plexin D1 [Source:HGNC Symbol;Acc:HGNC:9107]	no	no	no	no
ENSG00000004455	6416.98	-0.341054	0.0691887	-4.92934	8.25097e-07	4.14361e-06	1	AK2	33007986	33080996	adenylate kinase 2 [Source:HGNC Symbol;Acc:HGNC:362]	no	no	no	no
ENSG00000004478	12087	-0.352055	0.0408037	-8.62802	6.24217e-18	1.62296e-16	12	FKBP4	2794970	2805423	FKBP prolyl isomerase 4 [Source:HGNC Symbol;Acc:HGNC:3720]	no	no	no	no
ENSG00000004487	16640.2	-0.196492	0.0420661	-4.67102	2.9971e-06	1.34888e-05	1	KDM1A	23019443	23083689	lysine demethylase 1A [Source:HGNC Symbol;Acc:HGNC:29079]	no	no	no	no
ENSG00000004534	7896.07	0.162087	0.074857	2.16528	0.0303661	0.0528432	3	RBM6	49940007	50100045	RNA binding motif protein 6 [Source:HGNC Symbol;Acc:HGNC:9903]	no	no	no	no
ENSG00000004660	686.496	0.303663	0.0749999	4.04884	5.14722e-05	0.000178271	17	CAMKK1	3860315	3894891	calcium/calmodulin dependent protein kinase kinase 1 [Source:HGNC Symbol;Acc:HGNC:1469]	no	no	no	no
ENSG00000004700	1778.85	-0.177134	0.0660315	-2.68257	0.00730594	0.0150808	12	RECQL	21468910	21501669	RecQ like helicase [Source:HGNC Symbol;Acc:HGNC:9948]	no	no	no	no
ENSG00000004766	571.382	-0.295462	0.0893716	-3.306	0.000946378	0.00245716	7	VPS50	93232340	93361123	VPS50 subunit of EARP/GARPII complex [Source:HGNC Symbol;Acc:HGNC:25956]	no	no	no	no
ENSG00000004777	1134.51	0.541369	0.0951937	5.68702	1.29274e-08	9.04068e-08	19	ARHGAP33	35774532	35788822	Rho GTPase activating protein 33 [Source:HGNC Symbol;Acc:HGNC:23085]	no	no	no	no
ENSG00000004779	2557.16	-0.203936	0.072278	-2.82155	0.0047792	0.0103927	16	NDUFAB1	23581014	23596316	NADH:ubiquinone oxidoreductase subunit AB1 [Source:HGNC Symbol;Acc:HGNC:7694]	no	no	no	no
ENSG00000004864	3646.99	-0.263572	0.0536938	-4.9088	9.16347e-07	4.5464e-06	7	SLC25A13	96120220	96322147	solute carrier family 25 member 13 [Source:HGNC Symbol;Acc:HGNC:10983]	no	no	no	no
ENSG00000004866	518.172	-0.323437	0.0800387	-4.04101	5.32208e-05	0.000183561	7	ST7	116953238	117230176	suppression of tumorigenicity 7 [Source:HGNC Symbol;Acc:HGNC:11351]	no	no	no	no
ENSG00000004897	3482.41	0.0597541	0.0769069	0.776967	0.437178	0.519297	17	CDC27	47117703	47189422	cell division cycle 27 [Source:HGNC Symbol;Acc:HGNC:1728]	no	no	no	no
ENSG00000004948	64.9012	0.392172	0.200652	1.95449	0.0506429	0.0822678	7	CALCR	93424486	93574730	calcitonin receptor [Source:HGNC Symbol;Acc:HGNC:1440]	no	no	no	no
ENSG00000004961	939.125	-0.446862	0.0847007	-5.27578	1.32193e-07	7.64377e-07	X	HCCS	11111301	11123086	holocytochrome c synthase [Source:HGNC Symbol;Acc:HGNC:4837]	no	no	no	yes
ENSG00000004975	2065.92	-0.285093	0.0543131	-5.24906	1.52874e-07	8.74806e-07	17	DVL2	7225342	7234517	dishevelled segment polarity protein 2 [Source:HGNC Symbol;Acc:HGNC:3086]	no	no	no	no
ENSG00000005001	56.4078	1.27127	0.169284	7.50967	5.92773e-14	9.36142e-13	16	PRSS22	2852730	2858170	serine protease 22 [Source:HGNC Symbol;Acc:HGNC:14368]	no	no	no	no
ENSG00000005007	6230.46	0.0425042	0.0867059	0.490211	0.623984	0.694019	19	UPF1	18831959	18868230	UPF1 RNA helicase and ATPase [Source:HGNC Symbol;Acc:HGNC:9962]	no	no	no	no
ENSG00000005020	228.337	-0.1669	0.0799085	-2.08864	0.0367401	0.0623645	7	SKAP2	26667068	26995239	src kinase associated phosphoprotein 2 [Source:HGNC Symbol;Acc:HGNC:15687]	no	no	no	no
ENSG00000005022	11682.4	-0.11315	0.0460916	-2.45489	0.0140926	0.0269674	X	SLC25A5	119468422	119471396	solute carrier family 25 member 5 [Source:HGNC Symbol;Acc:HGNC:10991]	no	no	no	yes
ENSG00000005059	349.015	-0.346621	0.100994	-3.4321	0.00059893	0.00162961	4	MCUB	109560209	109688719	mitochondrial calcium uniporter dominant negative subunit beta [Source:HGNC Symbol;Acc:HGNC:26076]	no	no	no	no
ENSG00000005075	999.421	-0.171474	0.103141	-1.66251	0.0964097	0.144098	7	POLR2J	102473128	102478922	RNA polymerase II subunit J [Source:HGNC Symbol;Acc:HGNC:9197]	no	no	no	no
ENSG00000005100	5093.52	-0.155338	0.0466465	-3.33011	0.000868125	0.00227696	17	DHX33	5440917	5468982	DEAH-box helicase 33 [Source:HGNC Symbol;Acc:HGNC:16718]	no	no	no	no
ENSG00000005108	35.2235	-0.209987	0.14619	-1.4364	0.150888	0.212178	7	THSD7A	11370365	11832198	thrombospondin type 1 domain containing 7A [Source:HGNC Symbol;Acc:HGNC:22207]	no	no	no	no
ENSG00000005156	5618.2	0.0367719	0.0518147	0.709681	0.477902	0.558601	17	LIG3	34980512	35009743	DNA ligase 3 [Source:HGNC Symbol;Acc:HGNC:6600]	no	no	no	no
ENSG00000005175	2465.71	-0.255692	0.0787346	-3.24751	0.00116418	0.00296287	12	RPAP3	47661249	47706030	RNA polymerase II associated protein 3 [Source:HGNC Symbol;Acc:HGNC:26151]	no	no	no	no
ENSG00000005187	313.118	0.38946	0.0979534	3.97597	7.00929e-05	0.000236186	16	ACSM3	20610243	20797581	acyl-CoA synthetase medium chain family member 3 [Source:HGNC Symbol;Acc:HGNC:10522]	no	no	no	no
ENSG00000005189	325.593	0.0736199	0.0511577	1.43908	0.150129	0.21137	16	REXO5	20806429	20849665	RNA exonuclease 5 [Source:HGNC Symbol;Acc:HGNC:24661]	no	no	no	no
ENSG00000005194	2698.44	-0.303544	0.0537498	-5.64736	1.62932e-08	1.12055e-07	16	CIAPIN1	57428187	57447420	cytokine induced apoptosis inhibitor 1 [Source:HGNC Symbol;Acc:HGNC:28050]	no	no	no	no
ENSG00000005206	1661.28	0.281049	0.116206	2.41853	0.0155832	0.0294409	19	SPPL2B	2328615	2355095	signal peptide peptidase like 2B [Source:HGNC Symbol;Acc:HGNC:30627]	no	no	no	no
ENSG00000005238	300.018	-0.204723	0.0942896	-2.17121	0.0299149	0.0521798	9	ATOSB	35104112	35116341	atos homolog B [Source:HGNC Symbol;Acc:HGNC:25666]	no	no	no	no
ENSG00000005249	1433.32	-0.089352	0.0566322	-1.57776	0.114621	0.167394	7	PRKAR2B	107044705	107161811	protein kinase cAMP-dependent type II regulatory subunit beta [Source:HGNC Symbol;Acc:HGNC:9392]	no	no	no	no
ENSG00000005302	806.441	0.192555	0.0684332	2.81377	0.00489641	0.0106073	X	MSL3	11758159	11775772	MSL complex subunit 3 [Source:HGNC Symbol;Acc:HGNC:7370]	no	yes	no	no
ENSG00000005339	3863.64	-0.0205448	0.0784213	-0.26198	0.793337	0.837354	16	CREBBP	3725054	3880713	CREB binding protein [Source:HGNC Symbol;Acc:HGNC:2348]	no	no	no	no
ENSG00000005379	735.683	0.26187	0.101239	2.58664	0.00969162	0.0194432	17	TSPOAP1	58301228	58328795	TSPO associated protein 1 [Source:HGNC Symbol;Acc:HGNC:16831]	no	no	no	no
ENSG00000005436	737.033	0.120338	0.101604	1.18439	0.23626	0.310246	2	GCFC2	75652000	75710985	GC-rich sequence DNA-binding factor 2 [Source:HGNC Symbol;Acc:HGNC:1317]	no	no	no	no
ENSG00000005448	2070.76	-0.311224	0.0996654	-3.12269	0.00179206	0.0043679	2	WDR54	74421678	74425755	WD repeat domain 54 [Source:HGNC Symbol;Acc:HGNC:25770]	no	no	no	no
ENSG00000005469	222.489	0.462632	0.0923529	5.00939	5.46026e-07	2.83934e-06	7	CROT	87345664	87399794	carnitine O-octanoyltransferase [Source:HGNC Symbol;Acc:HGNC:2366]	no	no	no	no
ENSG00000005471	84.0537	0.563648	0.0987594	5.70728	1.14794e-08	8.11167e-08	7	ABCB4	87401696	87480435	ATP binding cassette subfamily B member 4 [Source:HGNC Symbol;Acc:HGNC:45]	no	no	no	no
ENSG00000005483	2970.55	-0.208189	0.0632243	-3.29287	0.000991711	0.00256541	7	KMT2E	104940943	105115019	lysine methyltransferase 2E (inactive) [Source:HGNC Symbol;Acc:HGNC:18541]	no	no	no	no
ENSG00000005486	1161.74	-0.207804	0.0781665	-2.65848	0.00784949	0.016087	7	RHBDD2	75842602	75888926	rhomboid domain containing 2 [Source:HGNC Symbol;Acc:HGNC:23082]	no	no	no	no
ENSG00000005513	237.775	-0.0819835	0.0982721	-0.83425	0.40414	0.487149	16	SOX8	981770	986979	SRY-box transcription factor 8 [Source:HGNC Symbol;Acc:HGNC:11203]	no	no	no	no
ENSG00000005700	2306.4	-0.00182165	0.0883657	-0.0206149	0.983553	0.987125	6	IBTK	82169986	82247754	inhibitor of Bruton tyrosine kinase [Source:HGNC Symbol;Acc:HGNC:17853]	no	no	no	no
ENSG00000005801	3076.98	0.00825224	0.0730848	0.112913	0.910099	0.929661	11	ZNF195	3339261	3379222	zinc finger protein 195 [Source:HGNC Symbol;Acc:HGNC:12986]	no	no	no	no
ENSG00000005810	2428.48	0.571226	0.0721532	7.91684	2.43615e-15	4.57898e-14	13	MYCBP2	77042474	77327094	MYC binding protein 2 [Source:HGNC Symbol;Acc:HGNC:23386]	no	no	no	no
ENSG00000005812	411.538	-0.253092	0.104037	-2.43272	0.0149857	0.0284646	13	FBXL3	76992598	77027195	F-box and leucine rich repeat protein 3 [Source:HGNC Symbol;Acc:HGNC:13599]	no	no	no	no
ENSG00000005844	35.9199	-1.62659	0.212484	-7.65512	1.93132e-14	3.2903e-13	16	ITGAL	30472658	30523567	integrin subunit alpha L [Source:HGNC Symbol;Acc:HGNC:6148]	no	no	no	no
ENSG00000005882	377.284	-0.458927	0.0738777	-6.21198	5.23212e-10	4.59319e-09	17	PDK2	50094737	50112152	pyruvate dehydrogenase kinase 2 [Source:HGNC Symbol;Acc:HGNC:8810]	no	no	no	no
ENSG00000005884	1388.98	0.106608	0.0978163	1.08988	0.275765	0.353689	17	ITGA3	50055968	50090481	integrin subunit alpha 3 [Source:HGNC Symbol;Acc:HGNC:6139]	no	no	no	no
ENSG00000005889	570.914	-0.425749	0.0867539	-4.90754	9.22236e-07	4.57106e-06	X	ZFX	24149173	24216255	zinc finger protein X-linked [Source:HGNC Symbol;Acc:HGNC:12869]	no	yes	no	no
ENSG00000005893	2801.41	0.0576446	0.0881346	0.654051	0.513079	0.592112	X	LAMP2	120426148	120469365	lysosomal associated membrane protein 2 [Source:HGNC Symbol;Acc:HGNC:6501]	no	no	no	yes
ENSG00000005961	781.292	0.510605	0.0969379	5.26735	1.38409e-07	7.9815e-07	17	ITGA2B	44372180	44389649	integrin subunit alpha 2b [Source:HGNC Symbol;Acc:HGNC:6138]	no	no	no	no
ENSG00000006007	2572.82	-0.296105	0.0518922	-5.70615	1.15561e-08	8.15814e-08	16	GDE1	19501693	19522123	glycerophosphodiester phosphodiesterase 1 [Source:HGNC Symbol;Acc:HGNC:29644]	no	no	no	no
ENSG00000006015	882.133	0.114497	0.100113	1.14368	0.252756	0.328515	19	REX1BD	18588685	18592337	required for excision 1-B domain containing [Source:HGNC Symbol;Acc:HGNC:26098]	no	no	no	no
ENSG00000006016	437.321	-0.381455	0.142796	-2.67133	0.00755522	0.0155394	19	CRLF1	18572220	18607741	cytokine receptor like factor 1 [Source:HGNC Symbol;Acc:HGNC:2364]	no	no	no	no
ENSG00000006025	587.212	0.488995	0.109357	4.47153	7.76607e-06	3.21857e-05	17	OSBPL7	47807372	47821834	oxysterol binding protein like 7 [Source:HGNC Symbol;Acc:HGNC:16387]	no	no	no	no
ENSG00000006042	2112.67	-0.208602	0.0626805	-3.32802	0.000874664	0.0022921	17	TMEM98	32927910	32945106	transmembrane protein 98 [Source:HGNC Symbol;Acc:HGNC:24529]	no	no	no	no
ENSG00000006047	1236.99	0.555464	0.131753	4.21595	2.48734e-05	9.22034e-05	17	YBX2	7288263	7294639	Y-box binding protein 2 [Source:HGNC Symbol;Acc:HGNC:17948]	no	no	no	no
ENSG00000006062	446.381	0.0380513	0.099164	0.383721	0.701186	0.759342	17	MAP3K14	45263119	45317029	mitogen-activated protein kinase kinase kinase 14 [Source:HGNC Symbol;Acc:HGNC:6853]	no	no	no	no
ENSG00000006071	113.684	-0.321644	0.1226	-2.62353	0.00870249	0.0176414	11	ABCC8	17392498	17476894	ATP binding cassette subfamily C member 8 [Source:HGNC Symbol;Acc:HGNC:59]	no	no	no	no
ENSG00000006118	2802.47	-0.0655116	0.0977292	-0.670338	0.502642	0.582409	11	TMEM132A	60924460	60937159	transmembrane protein 132A [Source:HGNC Symbol;Acc:HGNC:31092]	no	no	no	no
ENSG00000006125	14308.4	-0.185634	0.0385476	-4.8157	1.46682e-06	7.00281e-06	17	AP2B1	35578046	35726413	adaptor related protein complex 2 subunit beta 1 [Source:HGNC Symbol;Acc:HGNC:563]	no	no	no	no
ENSG00000006128	66.7352	0.872128	0.17258	5.05348	4.33837e-07	2.29351e-06	7	TAC1	97732084	97740472	tachykinin precursor 1 [Source:HGNC Symbol;Acc:HGNC:11517]	no	no	no	no
ENSG00000006194	1706.3	-0.174632	0.0746617	-2.33898	0.0193365	0.0355691	16	ZNF263	3283283	3301401	zinc finger protein 263 [Source:HGNC Symbol;Acc:HGNC:13056]	no	no	no	no
ENSG00000006210	348.54	0.118844	0.0949778	1.25128	0.210831	0.281536	16	CX3CL1	57372477	57385044	C-X3-C motif chemokine ligand 1 [Source:HGNC Symbol;Acc:HGNC:10647]	no	no	no	no
ENSG00000006282	1017.72	-0.107754	0.0851534	-1.26541	0.205726	0.275868	17	SPATA20	50543058	50555852	spermatogenesis associated 20 [Source:HGNC Symbol;Acc:HGNC:26125]	no	no	no	no
ENSG00000006283	249.795	-0.0907987	0.0990344	-0.91684	0.359226	0.442043	17	CACNA1G	50560715	50627474	calcium voltage-gated channel subunit alpha1 G [Source:HGNC Symbol;Acc:HGNC:1394]	no	no	no	no
ENSG00000006327	1813.1	-0.208571	0.0692363	-3.01245	0.00259149	0.00606045	16	TNFRSF12A	3018445	3022383	TNF receptor superfamily member 12A [Source:HGNC Symbol;Acc:HGNC:18152]	no	no	no	no
ENSG00000006432	2516.58	-0.12914	0.0601323	-2.1476	0.0317459	0.0548987	14	MAP3K9	70722526	70809534	mitogen-activated protein kinase kinase kinase 9 [Source:HGNC Symbol;Acc:HGNC:6861]	no	no	no	no
ENSG00000006451	5018.17	-0.233502	0.0737246	-3.16722	0.00153903	0.00381157	7	RALA	39623565	39708120	RAS like proto-oncogene A [Source:HGNC Symbol;Acc:HGNC:9839]	no	no	no	no
ENSG00000006453	2418.03	0.216734	0.0542501	3.99509	6.46702e-05	0.000219349	7	BAIAP2L1	98291650	98401090	BAR/IMD domain containing adaptor protein 2 like 1 [Source:HGNC Symbol;Acc:HGNC:21649]	no	no	no	no
ENSG00000006459	2360.24	0.177339	0.094008	1.88642	0.0592384	0.0944321	7	KDM7A	140084746	140176983	lysine demethylase 7A [Source:HGNC Symbol;Acc:HGNC:22224]	no	no	no	no
ENSG00000006468	3779.99	-0.181741	0.0888768	-2.04487	0.0408682	0.068453	7	ETV1	13891229	13991425	ETS variant transcription factor 1 [Source:HGNC Symbol;Acc:HGNC:3490]	no	no	no	no
ENSG00000006530	1962.47	0.0771857	0.0606905	1.27179	0.203447	0.273363	7	AGK	141551278	141655244	acylglycerol kinase [Source:HGNC Symbol;Acc:HGNC:21869]	no	no	no	no
ENSG00000006555	78.6683	-0.00458492	0.100238	-0.0457402	0.963517	0.971891	1	TTC22	54779712	54801323	tetratricopeptide repeat domain 22 [Source:HGNC Symbol;Acc:HGNC:26067]	no	no	no	no
ENSG00000006576	1672.06	0.115661	0.0752469	1.53709	0.124271	0.179676	7	PHTF2	77798773	77957503	putative homeodomain transcription factor 2 [Source:HGNC Symbol;Acc:HGNC:13411]	no	no	no	no
ENSG00000006606	280.309	0.0699841	0.106655	0.656172	0.511714	0.590765	7	CCL26	75769533	75789896	C-C motif chemokine ligand 26 [Source:HGNC Symbol;Acc:HGNC:10625]	no	no	no	no
ENSG00000006607	1719.16	0.0124014	0.0677447	0.18306	0.854751	0.88629	2	FARP2	241356285	241494841	FERM, ARH/RhoGEF and pleckstrin domain protein 2 [Source:HGNC Symbol;Acc:HGNC:16460]	no	no	no	no
ENSG00000006611	556.441	0.741713	0.0823672	9.00496	2.15745e-19	6.69392e-18	11	USH1C	17493895	17544416	USH1 protein network component harmonin [Source:HGNC Symbol;Acc:HGNC:12597]	no	no	no	no
ENSG00000006625	1567	-0.0589963	0.0582821	-1.01226	0.311416	0.392267	7	GGCT	30496621	30504841	gamma-glutamylcyclotransferase [Source:HGNC Symbol;Acc:HGNC:21705]	no	no	no	no
ENSG00000006634	2282.72	-0.280938	0.109949	-2.55515	0.0106141	0.0210645	7	DBF4	87876216	87909553	DBF4 zinc finger [Source:HGNC Symbol;Acc:HGNC:17364]	no	no	no	no
ENSG00000006652	325.664	0.0795892	0.16076	0.495081	0.620543	0.691066	7	IFRD1	112422887	112481017	interferon related developmental regulator 1 [Source:HGNC Symbol;Acc:HGNC:5456]	no	no	no	no
ENSG00000006695	1004.24	-0.137395	0.0616518	-2.22856	0.0258431	0.0459763	17	COX10	14069490	14231736	cytochrome c oxidase assembly factor heme A:farnesyltransferase COX10 [Source:HGNC Symbol;Acc:HGNC:2260]	no	no	no	no
ENSG00000006704	1606.53	0.077773	0.0607685	1.27982	0.200607	0.270144	7	GTF2IRD1	74453790	74602605	GTF2I repeat domain containing 1 [Source:HGNC Symbol;Acc:HGNC:4661]	no	no	no	no
ENSG00000006712	1327.42	-0.477638	0.0909113	-5.25389	1.4892e-07	8.54145e-07	19	PAF1	39385629	39391154	PAF1 homolog, Paf1/RNA polymerase II complex component [Source:HGNC Symbol;Acc:HGNC:25459]	no	no	no	no
ENSG00000006715	2158.83	-0.141566	0.0696885	-2.03141	0.0422139	0.0703832	7	VPS41	38722974	38932394	VPS41 subunit of HOPS complex [Source:HGNC Symbol;Acc:HGNC:12713]	no	no	no	no
ENSG00000006740	1324.65	0.162406	0.0562017	2.88969	0.00385621	0.00860626	17	ARHGAP44	12789498	12991643	Rho GTPase activating protein 44 [Source:HGNC Symbol;Acc:HGNC:29096]	no	no	no	no
ENSG00000006744	5137.94	-0.138402	0.0507738	-2.72585	0.00641354	0.0134432	17	ELAC2	12991612	13018065	elaC ribonuclease Z 2 [Source:HGNC Symbol;Acc:HGNC:14198]	no	no	no	no
ENSG00000006747	52.5397	-0.0537472	0.230659	-0.233016	0.815749	0.854393	7	SCIN	12570577	12660182	scinderin [Source:HGNC Symbol;Acc:HGNC:21695]	no	no	no	no
ENSG00000006756	145.89	0.0509668	0.0839435	0.607156	0.543748	0.620594	X	ARSD	2903972	2929349	arylsulfatase D [Source:HGNC Symbol;Acc:HGNC:717]	no	yes	no	no
ENSG00000006757	557.848	-0.280543	0.0657729	-4.26533	1.99603e-05	7.56637e-05	X	PNPLA4	7898247	7927739	patatin like phospholipase domain containing 4 [Source:HGNC Symbol;Acc:HGNC:24887]	no	yes	no	no
ENSG00000006831	2361.97	-0.259082	0.0382359	-6.77588	1.23651e-11	1.40332e-10	12	ADIPOR2	1688574	1788674	adiponectin receptor 2 [Source:HGNC Symbol;Acc:HGNC:24041]	no	no	no	no
ENSG00000007047	2587.93	0.0345468	0.0780429	0.442664	0.658009	0.723078	19	MARK4	45079288	45305284	microtubule affinity regulating kinase 4 [Source:HGNC Symbol;Acc:HGNC:13538]	no	no	no	no
ENSG00000007062	3323.91	-0.206933	0.0708957	-2.91884	0.00351337	0.00792405	4	PROM1	15963076	16084378	prominin 1 [Source:HGNC Symbol;Acc:HGNC:9454]	no	no	no	no
ENSG00000007080	1995.74	0.236199	0.0955335	2.47242	0.0134203	0.0258665	19	CCDC124	17933015	17943991	coiled-coil domain containing 124 [Source:HGNC Symbol;Acc:HGNC:25171]	no	no	no	no
ENSG00000007168	6177.37	-0.0122296	0.0639023	-0.19138	0.848228	0.881236	17	PAFAH1B1	2593210	2685615	platelet activating factor acetylhydrolase 1b regulatory subunit 1 [Source:HGNC Symbol;Acc:HGNC:8574]	no	no	no	no
ENSG00000007171	119.239	0.120799	0.0954652	1.26538	0.205737	0.275868	17	NOS2	27756766	27800529	nitric oxide synthase 2 [Source:HGNC Symbol;Acc:HGNC:7873]	no	no	no	no
ENSG00000007202	6526.02	-0.0573114	0.0782805	-0.732128	0.46409	0.545705	17	BLTP2	28614446	28645454	bridge-like lipid transfer protein family member 2 [Source:HGNC Symbol;Acc:HGNC:28960]	no	no	no	no
ENSG00000007237	859.542	-0.0970948	0.0874644	-1.11011	0.266953	0.344251	17	GAS7	9910606	10198606	growth arrest specific 7 [Source:HGNC Symbol;Acc:HGNC:4169]	no	no	no	no
ENSG00000007255	826.102	-0.01074	0.105018	-0.102267	0.918544	0.935852	19	TRAPPC6A	45162928	45178237	trafficking protein particle complex subunit 6A [Source:HGNC Symbol;Acc:HGNC:23069]	no	no	no	no
ENSG00000007264	473.05	0.378372	0.103108	3.66965	0.00024288	0.000727713	19	MATK	3777970	3802129	megakaryocyte-associated tyrosine kinase [Source:HGNC Symbol;Acc:HGNC:6906]	no	no	no	no
ENSG00000007312	69.814	0.0232898	0.137441	0.169453	0.86544	0.893792	17	CD79B	63928738	63932336	CD79b molecule [Source:HGNC Symbol;Acc:HGNC:1699]	no	no	no	no
ENSG00000007314	619.478	-0.323672	0.0767834	-4.21539	2.49343e-05	9.24062e-05	17	SCN4A	63938554	63972918	sodium voltage-gated channel alpha subunit 4 [Source:HGNC Symbol;Acc:HGNC:10591]	no	no	no	no
ENSG00000007341	453.942	0.0665161	0.0781752	0.850859	0.394847	0.477908	1	ST7L	112523514	112620825	suppression of tumorigenicity 7 like [Source:HGNC Symbol;Acc:HGNC:18441]	no	no	no	no
ENSG00000007376	549.76	-0.254569	0.135247	-1.88226	0.0598012	0.0951971	16	RPUSD1	784974	788397	RNA pseudouridine synthase domain containing 1 [Source:HGNC Symbol;Acc:HGNC:14173]	no	no	no	no
ENSG00000007384	1807.38	0.385995	0.0859363	4.49165	7.06747e-06	2.952e-05	16	RHBDF1	58059	76355	rhomboid 5 homolog 1 [Source:HGNC Symbol;Acc:HGNC:20561]	no	no	no	no
ENSG00000007392	3961.43	0.0828848	0.0850255	0.974823	0.329648	0.411378	16	LUC7L	188969	229463	LUC7 like [Source:HGNC Symbol;Acc:HGNC:6723]	no	no	no	no
ENSG00000007402	1502.93	-0.0963871	0.0702504	-1.37205	0.170048	0.234872	3	CACNA2D2	50362613	50504244	calcium voltage-gated channel auxiliary subunit alpha2delta 2 [Source:HGNC Symbol;Acc:HGNC:1400]	no	no	no	no
ENSG00000007516	380.135	0.162903	0.121965	1.33566	0.181661	0.248498	16	BAIAP3	1333638	1349441	BAI1 associated protein 3 [Source:HGNC Symbol;Acc:HGNC:948]	no	no	no	no
ENSG00000007520	832.357	-0.0701892	0.0891291	-0.7875	0.430989	0.513704	16	TSR3	1349240	1351878	TSR3 ribosome maturation factor [Source:HGNC Symbol;Acc:HGNC:14175]	no	no	no	no
ENSG00000007541	689.003	-0.154931	0.112175	-1.38116	0.167231	0.231668	16	PIGQ	566995	584109	phosphatidylinositol glycan anchor biosynthesis class Q [Source:HGNC Symbol;Acc:HGNC:14135]	no	no	no	no
ENSG00000007545	833.349	0.227366	0.0640375	3.55052	0.000384475	0.0010969	16	CRAMP1	1612337	1677908	cramped chromatin regulator homolog 1 [Source:HGNC Symbol;Acc:HGNC:14122]	no	no	no	no
ENSG00000007866	2907.65	-0.0322412	0.0765016	-0.421444	0.673431	0.73553	6	TEAD3	35473597	35497079	TEA domain transcription factor 3 [Source:HGNC Symbol;Acc:HGNC:11716]	no	no	no	no
ENSG00000007923	3377.52	-0.194966	0.0690018	-2.82552	0.00472035	0.0102797	1	DNAJC11	6634168	6701924	DnaJ heat shock protein family (Hsp40) member C11 [Source:HGNC Symbol;Acc:HGNC:25570]	no	no	no	no
ENSG00000007944	1743.39	-0.448664	0.0790796	-5.67358	1.39844e-08	9.72973e-08	6	MYLIP	16129086	16148248	myosin regulatory light chain interacting protein [Source:HGNC Symbol;Acc:HGNC:21155]	no	no	no	no
ENSG00000007968	224.978	-0.00607845	0.106486	-0.0570824	0.95448	0.964693	1	E2F2	23506438	23531233	E2F transcription factor 2 [Source:HGNC Symbol;Acc:HGNC:3114]	no	no	no	no
ENSG00000008018	7015.24	-0.280401	0.050716	-5.52885	3.22334e-08	2.11265e-07	6	PSMB1	170535120	170553307	proteasome 20S subunit beta 1 [Source:HGNC Symbol;Acc:HGNC:9537]	no	no	no	no
ENSG00000008056	331.911	-0.219253	0.105068	-2.08678	0.036908	0.062614	X	SYN1	47571901	47619857	synapsin I [Source:HGNC Symbol;Acc:HGNC:11494]	no	no	no	yes
ENSG00000008083	18736	-0.240302	0.0520565	-4.61617	3.90886e-06	1.71475e-05	6	JARID2	15246069	15522042	jumonji and AT-rich interaction domain containing 2 [Source:HGNC Symbol;Acc:HGNC:6196]	no	no	no	no
ENSG00000008086	1021.21	-0.0870263	0.0619034	-1.40584	0.159771	0.222927	X	CDKL5	18425583	18653629	cyclin dependent kinase like 5 [Source:HGNC Symbol;Acc:HGNC:11411]	no	no	no	yes
ENSG00000008118	56.4207	-0.217263	0.129828	-1.67346	0.0942358	0.141316	1	CAMK1G	209583714	209613939	calcium/calmodulin dependent protein kinase IG [Source:HGNC Symbol;Acc:HGNC:14585]	no	no	no	no
ENSG00000008128	84.1054	0.347745	0.0946035	3.67582	0.000237091	0.000712083	1	CDK11A	1702379	1724357	cyclin dependent kinase 11A [Source:HGNC Symbol;Acc:HGNC:1730]	no	no	no	no
ENSG00000008130	2740.01	0.060332	0.0904718	0.666861	0.504861	0.584617	1	NADK	1751232	1780457	NAD kinase [Source:HGNC Symbol;Acc:HGNC:29831]	no	no	no	no
ENSG00000008256	1099.05	-0.0926375	0.0498601	-1.85795	0.063176	0.0997925	7	CYTH3	6161776	6272644	cytohesin 3 [Source:HGNC Symbol;Acc:HGNC:9504]	no	no	no	no
ENSG00000008277	1236.58	0.144498	0.0668591	2.16124	0.030677	0.0532972	7	ADAM22	87934143	88202889	ADAM metallopeptidase domain 22 [Source:HGNC Symbol;Acc:HGNC:201]	no	no	no	no
ENSG00000008282	3163.88	-0.144852	0.103575	-1.39852	0.161958	0.22546	7	SYPL1	106090505	106112589	synaptophysin like 1 [Source:HGNC Symbol;Acc:HGNC:11507]	no	no	no	no
ENSG00000008283	967.974	-0.278339	0.0658097	-4.22946	2.34256e-05	8.72482e-05	17	CYB561	63432304	63446354	cytochrome b561 [Source:HGNC Symbol;Acc:HGNC:2571]	no	no	no	no
ENSG00000008294	4839.14	0.237996	0.051723	4.60136	4.19743e-06	1.82791e-05	17	SPAG9	50962174	51120868	sperm associated antigen 9 [Source:HGNC Symbol;Acc:HGNC:14524]	no	no	no	no
ENSG00000008300	2513.58	-0.0350372	0.059239	-0.591454	0.554216	0.630085	3	CELSR3	48636463	48662886	cadherin EGF LAG seven-pass G-type receptor 3 [Source:HGNC Symbol;Acc:HGNC:3230]	no	no	no	no
ENSG00000008311	31559.9	0.427687	0.117318	3.64555	0.000266817	0.000791722	7	AASS	122064583	122144308	aminoadipate-semialdehyde synthase [Source:HGNC Symbol;Acc:HGNC:17366]	no	no	no	no
ENSG00000008323	878.795	-0.0138879	0.0678048	-0.204822	0.837712	0.87201	12	PLEKHG6	6310436	6328506	pleckstrin homology and RhoGEF domain containing G6 [Source:HGNC Symbol;Acc:HGNC:25562]	no	no	no	no
ENSG00000008324	1108.68	-0.183836	0.0674565	-2.72525	0.00642524	0.013465	3	SS18L2	42581840	42596934	SS18 like 2 [Source:HGNC Symbol;Acc:HGNC:15593]	no	no	no	no
ENSG00000008382	383.989	0.11835	0.0829484	1.42679	0.153641	0.215562	19	MPND	4343527	4360086	MPN domain containing [Source:HGNC Symbol;Acc:HGNC:25934]	no	no	no	no
ENSG00000008394	9043	-0.228852	0.0772981	-2.96064	0.00307003	0.00704121	12	MGST1	16347142	16609259	microsomal glutathione S-transferase 1 [Source:HGNC Symbol;Acc:HGNC:7061]	no	no	no	no
ENSG00000008405	1824.65	-0.103193	0.0617707	-1.67058	0.0948055	0.142085	12	CRY1	106991364	107093549	cryptochrome circadian regulator 1 [Source:HGNC Symbol;Acc:HGNC:2384]	no	no	no	no
ENSG00000008513	549.882	0.356627	0.0834201	4.27508	1.91072e-05	7.27067e-05	8	ST3GAL1	133454848	133571940	ST3 beta-galactoside alpha-2,3-sialyltransferase 1 [Source:HGNC Symbol;Acc:HGNC:10862]	no	no	no	no
ENSG00000008516	1239.13	-0.204537	0.0764686	-2.67479	0.00747758	0.0154043	16	MMP25	3046062	3060726	matrix metallopeptidase 25 [Source:HGNC Symbol;Acc:HGNC:14246]	no	no	no	no
ENSG00000008517	90.6598	0.594709	0.162958	3.64947	0.000262783	0.000781229	16	IL32	3065297	3082192	interleukin 32 [Source:HGNC Symbol;Acc:HGNC:16830]	no	no	no	no
ENSG00000008710	3186.34	0.813923	0.120943	6.72981	1.69882e-11	1.90196e-10	16	PKD1	2088708	2135898	polycystin 1, transient receptor potential channel interacting [Source:HGNC Symbol;Acc:HGNC:9008]	no	no	no	no
ENSG00000008735	39.8112	-0.449869	0.165795	-2.71341	0.00665953	0.0138905	22	MAPK8IP2	50600793	50613981	mitogen-activated protein kinase 8 interacting protein 2 [Source:HGNC Symbol;Acc:HGNC:6883]	no	no	no	no
ENSG00000008838	3871.02	-0.0138024	0.0531136	-0.259866	0.794967	0.838393	17	MED24	40019097	40061215	mediator complex subunit 24 [Source:HGNC Symbol;Acc:HGNC:22963]	no	no	no	no
ENSG00000008853	390.096	-0.398707	0.0864564	-4.61166	3.99474e-06	1.74729e-05	8	RHOBTB2	22987417	23020509	Rho related BTB domain containing 2 [Source:HGNC Symbol;Acc:HGNC:18756]	no	no	no	no
ENSG00000008869	1283.57	-0.0628773	0.0734662	-0.855867	0.392071	0.475139	2	HEATR5B	36968383	37084372	HEAT repeat containing 5B [Source:HGNC Symbol;Acc:HGNC:29273]	no	no	no	no
ENSG00000008952	3396.74	-0.31156	0.0733384	-4.24825	2.15446e-05	8.10516e-05	3	SEC62	169966635	169998373	SEC62 homolog, preprotein translocation factor [Source:HGNC Symbol;Acc:HGNC:11846]	no	no	no	no
ENSG00000008988	28983.2	-0.242709	0.0489532	-4.95799	7.12275e-07	3.62304e-06	8	RPS20	56067254	56074510	ribosomal protein S20 [Source:HGNC Symbol;Acc:HGNC:10405]	no	no	no	no
ENSG00000009307	38637.1	-0.120981	0.0559061	-2.164	0.0304644	0.0529895	1	CSDE1	114716913	114758676	cold shock domain containing E1 [Source:HGNC Symbol;Acc:HGNC:29905]	no	no	no	no
ENSG00000009335	4431.7	-0.126106	0.0503769	-2.50326	0.0123057	0.0240316	7	UBE3C	157138916	157269370	ubiquitin protein ligase E3C [Source:HGNC Symbol;Acc:HGNC:16803]	no	no	no	no
ENSG00000009413	694.811	0.470086	0.0750716	6.26184	3.80451e-10	3.42039e-09	6	REV3L	111299028	111483715	REV3 like, DNA directed polymerase zeta catalytic subunit [Source:HGNC Symbol;Acc:HGNC:9968]	no	no	no	no
ENSG00000009694	595.785	0.937474	0.168035	5.57905	2.41837e-08	1.61702e-07	X	TENM1	124375903	125204312	teneurin transmembrane protein 1 [Source:HGNC Symbol;Acc:HGNC:8117]	no	no	no	yes
ENSG00000009709	37.1352	1.7031	0.427759	3.98145	6.8496e-05	0.000231118	1	PAX7	18630846	18748866	paired box 7 [Source:HGNC Symbol;Acc:HGNC:8621]	no	no	no	no
ENSG00000009724	70.0755	1.30798	0.142549	9.17564	4.48918e-20	1.47245e-18	1	MASP2	11022009	11047239	MBL associated serine protease 2 [Source:HGNC Symbol;Acc:HGNC:6902]	no	no	no	no
ENSG00000009780	485.529	-0.162576	0.0762055	-2.13338	0.0328933	0.0566074	1	FAM76A	27725961	27763116	family with sequence similarity 76 member A [Source:HGNC Symbol;Acc:HGNC:28530]	no	no	no	no
ENSG00000009830	1384.68	-0.0351093	0.0629476	-0.557754	0.577013	0.650944	14	POMT2	77274956	77320883	protein O-mannosyltransferase 2 [Source:HGNC Symbol;Acc:HGNC:19743]	no	no	no	no
ENSG00000009844	3096.58	-0.276773	0.0778352	-3.55588	0.000376716	0.00107827	6	VTA1	142147162	142224685	vesicle trafficking 1 [Source:HGNC Symbol;Acc:HGNC:20954]	no	no	no	no
ENSG00000009950	541.521	0.433271	0.107911	4.01507	5.94273e-05	0.00020295	7	MLXIPL	73593194	73624543	MLX interacting protein like [Source:HGNC Symbol;Acc:HGNC:12744]	no	no	no	no
ENSG00000009954	6681.24	-0.308164	0.0524915	-5.87074	4.33857e-09	3.28841e-08	7	BAZ1B	73440406	73522293	bromodomain adjacent to zinc finger domain 1B [Source:HGNC Symbol;Acc:HGNC:961]	no	no	no	no
ENSG00000010017	1925.75	-0.181772	0.0691125	-2.6301	0.0085361	0.0173347	6	RANBP9	13621498	13711835	RAN binding protein 9 [Source:HGNC Symbol;Acc:HGNC:13727]	no	no	no	no
ENSG00000010072	452.504	-0.174242	0.0901878	-1.93199	0.0533608	0.0861485	1	SPRTN	231337104	231355023	SprT-like N-terminal domain [Source:HGNC Symbol;Acc:HGNC:25356]	no	no	no	no
ENSG00000010165	2376.22	-0.264087	0.0638618	-4.13528	3.54514e-05	0.000126816	1	METTL13	171781660	171814023	methyltransferase 13, eEF1A lysine and N-terminal methyltransferase [Source:HGNC Symbol;Acc:HGNC:24248]	no	no	no	no
ENSG00000010219	174.493	0.216171	0.0895029	2.41524	0.0157247	0.0296681	12	DYRK4	4562208	4615302	dual specificity tyrosine phosphorylation regulated kinase 4 [Source:HGNC Symbol;Acc:HGNC:3095]	no	no	no	no
ENSG00000010244	10555.6	0.144089	0.0542314	2.65692	0.00788579	0.0161511	17	ZNF207	32350132	32381885	zinc finger protein 207 [Source:HGNC Symbol;Acc:HGNC:12998]	no	no	no	no
ENSG00000010256	6306.51	-0.121529	0.0628429	-1.93385	0.0531312	0.0858243	3	UQCRC1	48599002	48610976	ubiquinol-cytochrome c reductase core protein 1 [Source:HGNC Symbol;Acc:HGNC:12585]	no	no	no	no
ENSG00000010270	1497.25	-0.20421	0.0536889	-3.80358	0.000142622	0.000448766	7	STARD3NL	38178245	38230670	STARD3 N-terminal like [Source:HGNC Symbol;Acc:HGNC:19169]	no	no	no	no
ENSG00000010278	5476.41	-0.231428	0.0569365	-4.06466	4.81023e-05	0.000167572	12	CD9	6199715	6238271	CD9 molecule [Source:HGNC Symbol;Acc:HGNC:1709]	no	no	no	no
ENSG00000010292	15495.5	0.258169	0.0407033	6.34271	2.25764e-10	2.1045e-09	12	NCAPD2	6493356	6531955	non-SMC condensin I complex subunit D2 [Source:HGNC Symbol;Acc:HGNC:24305]	no	no	no	no
ENSG00000010295	602.668	-0.119826	0.0838451	-1.42914	0.152964	0.214754	12	IFFO1	6538961	6556073	intermediate filament family orphan 1 [Source:HGNC Symbol;Acc:HGNC:24970]	no	no	no	no
ENSG00000010318	487.059	0.461811	0.0679921	6.79212	1.10495e-11	1.2646e-10	3	PHF7	52410660	52423641	PHD finger protein 7 [Source:HGNC Symbol;Acc:HGNC:18458]	no	no	no	no
ENSG00000010319	229.003	-0.0736043	0.0966394	-0.761639	0.446276	0.52796	3	SEMA3G	52433035	52445103	semaphorin 3G [Source:HGNC Symbol;Acc:HGNC:30400]	no	no	no	no
ENSG00000010322	5063.36	-0.0362382	0.0672652	-0.538736	0.590069	0.663166	3	NISCH	52455118	52493068	nischarin [Source:HGNC Symbol;Acc:HGNC:18006]	no	no	no	no
ENSG00000010327	133.948	0.583751	0.141486	4.12586	3.69347e-05	0.000131492	3	STAB1	52495338	52524495	stabilin 1 [Source:HGNC Symbol;Acc:HGNC:18628]	no	no	no	no
ENSG00000010361	700.07	-0.0989833	0.062044	-1.59537	0.110629	0.162343	19	FUZ	49806866	49817376	fuzzy planar cell polarity protein [Source:HGNC Symbol;Acc:HGNC:26219]	no	no	no	no
ENSG00000010404	201.743	0.0738541	0.0754364	0.979024	0.327568	0.409124	X	IDS	149476988	149521096	iduronate 2-sulfatase [Source:HGNC Symbol;Acc:HGNC:5389]	no	no	no	yes
ENSG00000010539	394.124	-0.172233	0.0867337	-1.98577	0.0470593	0.0772027	16	ZNF200	3222325	3236221	zinc finger protein 200 [Source:HGNC Symbol;Acc:HGNC:12993]	no	no	no	no
ENSG00000010610	205.171	0.243919	0.0962386	2.53452	0.0112601	0.0221872	12	CD4	6786858	6820799	CD4 molecule [Source:HGNC Symbol;Acc:HGNC:1678]	no	no	no	no
ENSG00000010626	143.412	-0.0817295	0.108303	-0.754636	0.450468	0.53216	12	LRRC23	6873569	6914241	leucine rich repeat containing 23 [Source:HGNC Symbol;Acc:HGNC:19138]	no	no	no	no
ENSG00000010704	108.423	0.244076	0.0874404	2.79134	0.00524905	0.0112877	6	HFE	26087281	26098343	homeostatic iron regulator [Source:HGNC Symbol;Acc:HGNC:4886]	no	no	no	no
ENSG00000010803	728.541	0.335552	0.0616393	5.4438	5.21544e-08	3.27816e-07	1	SCMH1	41027202	41242306	Scm polycomb group protein homolog 1 [Source:HGNC Symbol;Acc:HGNC:19003]	no	no	no	no
ENSG00000010810	3713.76	-0.0432483	0.0670721	-0.644804	0.519054	0.597437	6	FYN	111660332	111873452	FYN proto-oncogene, Src family tyrosine kinase [Source:HGNC Symbol;Acc:HGNC:4037]	no	no	no	no
[truncated: 14,684 more rows]

## Sheet: NSCs
ensembl_gene_id	baseMean	log2FoldChange	lfcSE	stat	pvalue	padj	chromosome_name	hgnc_symbol	start_position	end_position	description	isPAR	escape_Tukianien	variable_Tukianien	inactive_Tukianien
[truncated: 13,989 more rows]

[truncated: 1 more sheets: Sheet1]
