# Supplementary material for: An iPSC-based model of 47,XYY Jacobs syndrome reveals a DNA methylation-independent transcriptional dysregulation shared with male X aneuploid cells
Source: Genome Res. 2025 Jul;35(7):1503–17. doi: 10.1101/gr.279716.124 (PMC12212075; doi:10.1101/gr.279716.124)
Supplement: Supplement 5 [file Supplemental_Data_S4_R3.xlsx]

## Sheet: Fibroblasts-FDR0.05 LogFC0.58
Supplemental Data S4: List of DEGs From RNAseq Analysis of 47,XXY vs 46,XY Fibroblasts FDR<0.05 LogFC>|0.58|
ensembl_gene_id	baseMean	log2FoldChange	lfcSE	stat	pvalue	padj	regulation	chromosome_name	hgnc_symbol	start_position	end_position	description	isPAR	escape_Tukianien	variable_Tukianien	inactive_Tukianien
ENSG00000001617	573.183	-0.999	0.24	-4.169	3.1e-05	0.00036	down	3	SEMA3F	50155045	50189075	semaphorin 3F [Sourc...	no	no	no	no
ENSG00000001630	126.926	-1.004	0.221	-4.542	5.6e-06	8.1e-05	down	7	CYP51A1	92084987	92134803	cytochrome P450 fami...	no	no	no	no
ENSG00000003400	143.619	-1.839	0.361	-5.102	3.4e-07	6.6e-06	down	2	CASP10	201182872	201229428	caspase 10 [Source:H...	no	no	no	no
ENSG00000004399	11012.9	-1.028	0.18	-5.697	1.2e-08	3.2e-07	down	3	PLXND1	129555214	129606676	plexin D1 [Source:HG...	no	no	no	no
ENSG00000005059	650.822	-0.622	0.17	-3.666	0.00025	0.002	down	4	MCUB	109560209	109688719	mitochondrial calciu...	no	no	no	no
ENSG00000005379	654.366	1.415	0.195	7.242	4.4e-13	2.5e-11	up	17	TSPOAP1	58301228	58328795	TSPO associated prot...	no	no	no	no
ENSG00000005471	147.569	2.59	0.385	6.729	1.7e-11	7.7e-10	up	7	ABCB4	87401696	87480435	ATP binding cassette...	no	no	no	no
ENSG00000005810	3784.13	-1.099	0.203	-5.402	6.6e-08	1.5e-06	down	13	MYCBP2	77042474	77327094	MYC binding protein ...	no	no	no	no
ENSG00000006025	573.017	0.714	0.139	5.129	2.9e-07	5.8e-06	up	17	OSBPL7	47807372	47821834	oxysterol binding pr...	no	no	no	no
ENSG00000006118	783.716	0.691	0.233	2.97	0.003	0.018	up	11	TMEM132A	60924460	60937159	transmembrane protei...	no	no	no	no
ENSG00000006282	3362.29	-0.655	0.139	-4.697	2.6e-06	4.1e-05	down	17	SPATA20	50543058	50555852	spermatogenesis asso...	no	no	no	no
ENSG00000006468	694.211	0.995	0.369	2.692	0.007	0.036	up	7	ETV1	13891229	13991425	ETS variant transcri...	no	no	no	no
ENSG00000006534	1923.66	-0.893	0.184	-4.85	1.2e-06	2.1e-05	down	11	ALDH3B1	68008578	68029282	aldehyde dehydrogena...	no	no	no	no
ENSG00000006740	199.477	-0.943	0.267	-3.529	0.00042	0.004	down	17	ARHGAP44	12789498	12991643	Rho GTPase activatin...	no	no	no	no
ENSG00000006747	459.949	-1.883	0.535	-3.522	0.00043	0.004	down	7	SCIN	12570577	12660182	scinderin [Source:HG...	no	no	no	no
ENSG00000006756	694.267	-0.59	0.168	-3.512	0.00044	0.004	down	X	ARSD	2903972	2929349	arylsulfatase D [Sou...	no	yes	no	no
ENSG00000007372	68.359	4.56	0.831	5.485	4.1e-08	9.6e-07	up	11	PAX6	31784779	31817961	paired box 6 [Source...	no	no	no	no
ENSG00000007968	52.717	-0.78	0.267	-2.92	0.004	0.021	down	1	E2F2	23506438	23531233	E2F transcription fa...	no	no	no	no
ENSG00000008056	78.194	1.717	0.296	5.807	6.4e-09	1.8e-07	up	X	SYN1	47571901	47619857	synapsin I [Source:H...	no	no	no	yes
ENSG00000008118	54.089	2.795	0.459	6.083	1.2e-09	3.8e-08	up	1	CAMK1G	209583714	209613939	calcium/calmodulin d...	no	no	no	no
ENSG00000008394	3201.66	-1.286	0.264	-4.872	1.1e-06	1.9e-05	down	12	MGST1	16347142	16609259	microsomal glutathio...	no	no	no	no
ENSG00000008517	67.875	3.217	0.547	5.885	4e-09	1.1e-07	up	16	IL32	3065297	3082192	interleukin 32 [Sour...	no	no	no	no
ENSG00000011201	262.809	8.585	1.885	4.553	5.3e-06	7.8e-05	up	X	ANOS1	8528874	8732137	anosmin 1 [Source:HG...	no	yes	no	no
ENSG00000011347	36.32	2.229	0.49	4.548	5.4e-06	7.9e-05	up	11	SYT7	61513714	61581148	synaptotagmin 7 [Sou...	no	no	no	no
ENSG00000012171	809.385	0.718	0.259	2.771	0.006	0.03	up	3	SEMA3B	50267558	50277546	semaphorin 3B [Sourc...	no	no	no	no
ENSG00000012817	3485.91	1.177	0.128	9.202	3.5e-20	5.1e-18	up	Y	KDM5D	19703865	19744939	lysine demethylase 5...	no	no	no	no
ENSG00000013016	2427.22	0.738	0.19	3.879	0.00011	0.001	up	2	EHD3	31234152	31269451	EH domain containing...	no	no	no	no
ENSG00000013288	4592.62	-0.589	0.169	-3.486	0.00049	0.004	down	4	MAN2B2	6575189	6623362	mannosidase alpha cl...	no	no	no	no
ENSG00000013583	1620.28	-0.816	0.208	-3.93	8.5e-05	0.0009	down	12	HEBP1	12974870	13000265	heme binding protein...	no	no	no	no
ENSG00000013588	183.344	1.544	0.193	7.993	1.3e-15	1e-13	up	12	GPRC5A	12891559	12917937	G protein-coupled re...	no	no	no	no
ENSG00000013619	2222.61	-0.792	0.184	-4.297	1.7e-05	0.00022	down	X	MAMLD1	150361422	150514178	mastermind like doma...	no	no	no	yes
ENSG00000014138	121.6	-0.66	0.21	-3.142	0.002	0.011	down	11	POLA2	65261913	65305959	DNA polymerase alpha...	no	no	no	no
ENSG00000016402	26.347	-2.626	0.437	-6.004	1.9e-09	5.9e-08	down	6	IL20RA	136999971	137045180	interleukin 20 recep...	no	no	no	no
ENSG00000018236	144.129	5.388	1.614	3.338	0.00084	0.006	up	12	CNTN1	40692439	41072415	contactin 1 [Source:...	no	no	no	no
ENSG00000018408	4700.97	0.705	0.129	5.461	4.7e-08	1.1e-06	up	3	WWTR1	149517235	149736714	WW domain containing...	no	no	no	no
ENSG00000019186	84.863	5.762	1.627	3.542	0.0004	0.003	up	20	CYP24A1	54153446	54173986	cytochrome P450 fami...	no	no	no	no
ENSG00000020633	671.515	0.898	0.261	3.44	0.00058	0.005	up	1	RUNX3	24899511	24965121	RUNX family transcri...	no	no	no	no
ENSG00000023171	1329.82	-0.72	0.218	-3.305	0.00095	0.007	down	11	GRAMD1B	123358428	123627774	GRAM domain containi...	no	no	no	no
ENSG00000023191	12517.9	-0.807	0.206	-3.912	9.2e-05	0.00095	down	11	RNH1	494512	507300	ribonuclease/angioge...	no	no	no	no
ENSG00000023330	1611.38	-0.676	0.146	-4.617	3.9e-06	5.9e-05	down	3	ALAS1	52198086	52214327	5'-aminolevulinate s...	no	no	no	no
ENSG00000023445	58.424	1.63	0.315	5.174	2.3e-07	4.6e-06	up	11	BIRC3	102317450	102339403	baculoviral IAP repe...	no	no	no	no
ENSG00000023909	2245.37	-0.818	0.213	-3.848	0.00012	0.001	down	1	GCLM	93885199	93909456	glutamate-cysteine l...	no	no	no	no
ENSG00000026103	2023.15	-0.879	0.155	-5.659	1.5e-08	3.9e-07	down	10	FAS	88953813	89029605	Fas cell surface dea...	no	no	no	no
ENSG00000026297	232.324	-0.636	0.227	-2.803	0.005	0.028	down	6	RNASET2	166922113	166957191	ribonuclease T2 [Sou...	no	no	no	no
ENSG00000026559	530.388	1.407	0.223	6.313	2.7e-10	9.9e-09	up	20	KCNG1	51003656	51023107	potassium voltage-ga...	no	no	no	no
ENSG00000028137	317.554	-1.007	0.292	-3.446	0.00057	0.005	down	1	TNFRSF1B	12166991	12209228	TNF receptor superfa...	no	no	no	no
ENSG00000028277	589.16	1.539	0.136	11.345	7.9e-30	2.7e-27	up	19	POU2F2	42086110	42196585	POU class 2 homeobox...	no	no	no	no
ENSG00000030419	259.834	1.09	0.296	3.688	0.00023	0.002	up	2	IKZF2	212999691	213152427	IKAROS family zinc f...	no	no	no	no
ENSG00000030582	15413.9	-0.652	0.221	-2.953	0.003	0.019	down	17	GRN	44345246	44353106	granulin precursor [...	no	no	no	no
ENSG00000031691	265.577	-1.39	0.223	-6.224	4.8e-10	1.7e-08	down	6	CENPQ	49463370	49493107	centromere protein Q...	no	no	no	no
ENSG00000033327	735.038	-0.739	0.158	-4.675	2.9e-06	4.6e-05	down	11	GAB2	78215293	78418348	GRB2 associated bind...	no	no	no	no
ENSG00000034053	169.592	6.287	0.485	12.965	1.9e-38	1.2e-35	up	15	APBA2	28884483	29118315	amyloid beta precurs...	no	no	no	no
ENSG00000034152	6747.42	-0.84	0.204	-4.12	3.8e-05	0.00044	down	17	MAP2K3	21284672	21315232	mitogen-activated pr...	no	no	no	no
ENSG00000036448	56.078	1.511	0.218	6.934	4.1e-12	2e-10	up	8	MYOM2	2045046	2165552	myomesin 2 [Source:H...	no	no	no	no
ENSG00000039068	33.72	-1.91	0.437	-4.376	1.2e-05	0.00016	down	16	CDH1	68737292	68835537	cadherin 1 [Source:H...	no	no	no	no
ENSG00000039139	71.102	-0.702	0.153	-4.601	4.2e-06	6.3e-05	down	5	DNAH5	13690328	14011818	dynein axonemal heav...	no	no	no	no
ENSG00000041880	1691.31	-0.614	0.144	-4.261	2e-05	0.00025	down	3	PARP3	51942345	51948867	poly(ADP-ribose) pol...	no	no	no	no
ENSG00000041982	118461	2.107	0.179	11.773	5.4e-32	2.4e-29	up	9	TNC	115019575	115118207	tenascin C [Source:H...	no	no	no	no
ENSG00000042062	129.771	3.872	0.56	6.914	4.7e-12	2.3e-10	up	20	RIPOR3	50586108	50691542	RIPOR family member ...	no	no	no	no
ENSG00000043143	857.256	-0.798	0.162	-4.919	8.7e-07	1.6e-05	down	5	JADE2	134524312	134583230	jade family PHD fing...	no	no	no	no
ENSG00000044524	404.503	-2.129	0.597	-3.564	0.00036	0.003	down	3	EPHA3	89107621	89482134	EPH receptor A3 [Sou...	no	no	no	no
ENSG00000048540	24.643	-3.779	0.796	-4.749	2e-06	3.3e-05	down	12	LMO3	16548372	16610594	LIM domain only 3 [S...	no	no	no	no
ENSG00000048740	889.698	2.316	0.374	6.2	5.6e-10	1.9e-08	up	10	CELF2	10798397	11336675	CUGBP Elav-like fami...	no	no	no	no
ENSG00000049089	276.607	-1.227	0.275	-4.463	8.1e-06	0.00011	down	1	COL9A2	40300489	40317813	collagen type IX alp...	no	no	no	no
ENSG00000049130	3893.18	-0.634	0.103	-6.15	7.8e-10	2.6e-08	down	12	KITLG	88492793	88580851	KIT ligand [Source:H...	no	no	no	no
ENSG00000049192	1211.73	1.283	0.21	6.101	1.1e-09	3.4e-08	up	5	ADAMTS6	65148738	65481920	ADAM metallopeptidas...	no	no	no	no
ENSG00000049323	15522.4	0.653	0.21	3.104	0.002	0.013	up	2	LTBP1	32946953	33399509	latent transforming ...	no	no	no	no
ENSG00000049540	37985.1	-2.362	0.27	-8.742	2.3e-18	2.7e-16	down	7	ELN	74027789	74069907	elastin [Source:HGNC...	no	no	no	no
ENSG00000049759	375.211	1.514	0.294	5.148	2.6e-07	5.3e-06	up	18	NEDD4L	58044226	58401540	NEDD4 like E3 ubiqui...	no	no	no	no
ENSG00000050165	30725.4	0.799	0.123	6.501	8e-11	3.2e-09	up	11	DKK3	11956207	12009769	dickkopf WNT signali...	no	no	no	no
ENSG00000050767	219.959	7.426	2.115	3.511	0.00045	0.004	up	5	COL23A1	178237476	178590393	collagen type XXIII ...	no	no	no	no
ENSG00000053438	77.769	1.017	0.263	3.87	0.00011	0.001	up	20	NNAT	37521206	37523690	neuronatin [Source:H...	no	no	no	no
ENSG00000053747	137.609	-1.108	0.289	-3.836	0.00012	0.001	down	18	LAMA3	23689453	23956222	laminin subunit alph...	no	no	no	no
ENSG00000054282	1118.84	-0.673	0.203	-3.323	0.00089	0.007	down	1	SDCCAG8	243256034	243500091	SHH signaling and ci...	no	no	no	no
ENSG00000054356	1189.67	1.551	0.543	2.855	0.004	0.024	up	2	PTPRN	219289623	219309648	protein tyrosine pho...	no	no	no	no
ENSG00000054598	499.452	1.203	0.25	4.823	1.4e-06	2.4e-05	up	6	FOXC1	1609915	1613897	forkhead box C1 [Sou...	no	no	no	no
ENSG00000055163	342.913	1.72	0.182	9.456	3.2e-21	5.8e-19	up	5	CYFIP2	157266079	157395595	cytoplasmic FMR1 int...	no	no	no	no
ENSG00000055813	487.424	-3.43	0.323	-10.61	2.7e-26	7.8e-24	down	2	CCDC85A	56183990	56386172	coiled-coil domain c...	no	no	no	no
ENSG00000056558	217.568	0.623	0.219	2.84	0.005	0.025	up	9	TRAF1	120902393	120929173	TNF receptor associa...	no	no	no	no
ENSG00000057252	3239.33	-0.707	0.157	-4.494	7e-06	9.9e-05	down	1	SOAT1	179293714	179358680	sterol O-acyltransfe...	no	no	no	no
ENSG00000057657	420.184	0.877	0.287	3.051	0.002	0.015	up	6	PRDM1	105993463	106109939	PR/SET domain 1 [Sou...	no	no	no	no
ENSG00000058056	1506.96	-0.596	0.208	-2.861	0.004	0.024	down	3	USP13	179653032	179804366	ubiquitin specific p...	no	no	no	no
ENSG00000059378	532.7	0.75	0.234	3.202	0.001	0.01	up	7	PARP12	140023749	140062951	poly(ADP-ribose) pol...	no	no	no	no
ENSG00000060140	46.94	-1.646	0.274	-6.003	1.9e-09	5.9e-08	down	12	STYK1	10618923	10674318	serine/threonine/tyr...	no	no	no	no
ENSG00000060656	1110.93	0.764	0.26	2.939	0.003	0.02	up	1	PTPRU	29236516	29326813	protein tyrosine pho...	no	no	no	no
ENSG00000061656	206.696	0.779	0.203	3.833	0.00013	0.001	up	20	SPAG4	35615829	35621094	sperm associated ant...	no	no	no	no
ENSG00000061918	117.055	0.9	0.225	3.995	6.5e-05	0.0007	up	4	GUCY1B1	155758992	155807811	guanylate cyclase 1 ...	no	no	no	no
ENSG00000062038	25.024	-2.635	0.913	-2.886	0.004	0.023	down	16	CDH3	68636189	68727468	cadherin 3 [Source:H...	no	no	no	no
ENSG00000062524	154.867	2.292	0.43	5.331	9.8e-08	2.1e-06	up	15	LTK	41503637	41513887	leukocyte receptor t...	no	no	no	no
ENSG00000062716	9445.01	0.933	0.135	6.894	5.4e-12	2.6e-10	up	17	VMP1	59707192	59842255	vacuole membrane pro...	no	no	no	no
ENSG00000063660	12666.3	-1.342	0.177	-7.595	3.1e-14	2.1e-12	down	2	GPC1	240435663	240468076	glypican 1 [Source:H...	no	no	no	no
ENSG00000064042	1044.66	-1.93	0.271	-7.111	1.2e-12	6.2e-11	down	4	LIMCH1	41359607	41700044	LIM and calponin hom...	no	no	no	no
ENSG00000064115	1907.12	-0.614	0.074	-8.241	1.7e-16	1.5e-14	down	12	TM7SF3	26971579	27014434	transmembrane 7 supe...	no	no	no	no
ENSG00000064195	39.425	-2.238	0.704	-3.18	0.001	0.01	down	17	DLX3	49990005	49995224	distal-less homeobox...	no	no	no	no
ENSG00000064309	606.48	1.936	0.332	5.837	5.3e-09	1.5e-07	up	11	CDON	125955796	126063335	cell adhesion associ...	no	no	no	no
ENSG00000064687	184.499	-1.715	0.258	-6.645	3e-11	1.3e-09	down	19	ABCA7	1039997	1065572	ATP binding cassette...	no	no	no	no
ENSG00000064692	70.461	1.854	0.307	6.035	1.6e-09	5e-08	up	5	SNCAIP	122311354	122464219	synuclein alpha inte...	no	no	no	no
ENSG00000064703	1097.07	-0.65	0.215	-3.02	0.003	0.016	down	1	DDX20	111754832	111775602	DEAD-box helicase 20...	no	no	no	no
ENSG00000064763	339.417	1.454	0.299	4.869	1.1e-06	2e-05	up	12	FAR2	29149016	29341121	fatty acyl-CoA reduc...	no	no	no	no
ENSG00000064787	41.296	2.731	0.74	3.693	0.00022	0.002	up	20	BCAS1	53936777	54070594	brain enriched myeli...	no	no	no	no
ENSG00000065320	182.016	3.458	0.536	6.452	1.1e-10	4.3e-09	up	17	NTN1	9021510	9244000	netrin 1 [Source:HGN...	no	no	no	no
ENSG00000065328	409.563	-0.753	0.264	-2.851	0.004	0.025	down	10	MCM10	13161558	13211110	minichromosome maint...	no	no	no	no
ENSG00000065413	634.622	-0.939	0.234	-4.013	6e-05	0.00066	down	2	ANKRD44	196967017	197311173	ankyrin repeat domai...	no	no	no	no
ENSG00000066629	2168.56	0.705	0.197	3.578	0.00035	0.003	up	14	EML1	99737693	99942060	EMAP like 1 [Source:...	no	no	no	no
ENSG00000066735	25.595	5.342	1.909	2.798	0.005	0.028	up	14	KIF26A	104136454	104180894	kinesin family membe...	no	no	no	no
ENSG00000067048	6154.74	1.211	0.153	7.928	2.2e-15	1.7e-13	up	Y	DDX3Y	12904108	12920478	DEAD-box helicase 3 ...	no	no	no	no
ENSG00000067113	2255.21	-0.779	0.233	-3.337	0.00085	0.006	down	5	PLPP1	55424854	55534969	phospholipid phospha...	no	no	no	no
ENSG00000067141	4550.05	-1.473	0.227	-6.491	8.5e-11	3.4e-09	down	15	NEO1	73051710	73305205	neogenin 1 [Source:H...	no	no	no	no
ENSG00000067177	427.686	1.376	0.23	5.98	2.2e-09	6.7e-08	up	X	PHKA1	72578814	72714319	phosphorylase kinase...	no	no	no	yes
ENSG00000067445	1419.97	1.052	0.169	6.207	5.4e-10	1.9e-08	up	X	TRO	54920462	54931431	trophinin [Source:HG...	no	no	no	yes
ENSG00000067646	1499.47	0.848	0.145	5.853	4.8e-09	1.4e-07	up	Y	ZFY	2935281	2982506	zinc finger protein ...	no	no	no	no
ENSG00000067715	54.018	-2.716	0.56	-4.849	1.2e-06	2.1e-05	down	12	SYT1	78863993	79452008	synaptotagmin 1 [Sou...	no	no	no	no
ENSG00000067798	2161.46	-1.456	0.165	-8.816	1.2e-18	1.5e-16	down	12	NAV3	77324641	78213010	neuron navigator 3 [...	no	no	no	no
ENSG00000067955	2977.61	-0.603	0.173	-3.485	0.00049	0.004	down	16	CBFB	67028984	67101058	core-binding factor ...	no	no	no	no
ENSG00000067992	253.958	0.897	0.165	5.426	5.8e-08	1.3e-06	up	X	PDK3	24465244	24550466	pyruvate dehydrogena...	no	no	no	yes
ENSG00000068078	141.035	-0.941	0.299	-3.153	0.002	0.011	down	4	FGFR3	1793293	1808872	fibroblast growth fa...	no	no	no	no
ENSG00000068489	1764.3	0.904	0.235	3.838	0.00012	0.001	up	17	PRR11	59155732	59206709	proline rich 11 [Sou...	no	no	no	no
ENSG00000069011	98.141	4.697	0.801	5.867	4.4e-09	1.3e-07	up	5	PITX1	135027734	135034813	paired like homeodom...	no	no	no	no
ENSG00000069122	27.289	-4.287	1.119	-3.83	0.00013	0.001	down	6	ADGRF5	46852522	46954943	adhesion G protein-c...	no	no	no	no
ENSG00000069399	826.499	0.73	0.19	3.85	0.00012	0.001	up	19	BCL3	44747705	44760044	BCL3 transcription c...	no	no	no	no
ENSG00000069431	393.967	-1.389	0.27	-5.142	2.7e-07	5.4e-06	down	12	ABCC9	21797389	21942543	ATP binding cassette...	no	no	no	no
ENSG00000069482	37.152	4.035	0.599	6.736	1.6e-11	7.3e-10	up	11	GAL	68683779	68691175	galanin and GMAP pre...	no	no	no	no
ENSG00000070614	18010.9	-0.668	0.212	-3.147	0.002	0.011	down	5	NDST1	150485818	150558211	N-deacetylase and N-...	no	no	no	no
ENSG00000070961	4265.67	-1.603	0.184	-8.73	2.5e-18	3e-16	down	12	ATP2B1	89588049	89709366	ATPase plasma membra...	no	no	no	no
ENSG00000071246	424.849	0.999	0.234	4.267	2e-05	0.00024	up	14	VASH1	76761468	76783015	vasohibin 1 [Source:...	no	no	no	no
ENSG00000071282	2338.55	-1.311	0.233	-5.63	1.8e-08	4.5e-07	down	3	LMCD1	8501807	8574668	LIM and cysteine ric...	no	no	no	no
ENSG00000071575	2878.09	0.589	0.223	2.642	0.008	0.041	up	2	TRIB2	12716910	12742734	tribbles pseudokinas...	no	no	no	no
ENSG00000071967	16180.4	-0.706	0.2	-3.534	0.00041	0.004	down	2	CYBRD1	171522247	171558129	cytochrome b reducta...	no	no	no	no
ENSG00000072133	248.124	0.606	0.231	2.619	0.009	0.043	up	X	RPS6KA6	84058346	84206356	ribosomal protein S6...	no	no	no	yes
ENSG00000072195	6064.12	1.001	0.176	5.681	1.3e-08	3.5e-07	up	2	SPEG	219434843	219493629	striated muscle enri...	no	no	no	no
ENSG00000072274	6504.34	-0.613	0.107	-5.752	8.8e-09	2.4e-07	down	3	TFRC	196012511	196082153	transferrin receptor...	no	no	no	no
ENSG00000072422	2334.7	-0.763	0.255	-2.988	0.003	0.017	down	10	RHOBTB1	60869438	61001440	Rho related BTB doma...	no	no	no	no
ENSG00000072657	1372.27	13.059	0.786	16.624	4.7e-62	1.5e-58	up	12	TRHDE	72087266	72670758	thyrotropin releasin...	no	no	no	no
ENSG00000072952	2402.92	-1.18	0.259	-4.559	5.1e-06	7.6e-05	down	11	IRAG1	10573091	10693988	inositol 1,4,5-triph...	no	no	no	no
ENSG00000073111	1070.72	-0.67	0.204	-3.287	0.001	0.007	down	3	MCM2	127598410	127622436	minichromosome maint...	no	no	no	no
ENSG00000073146	59.826	2.877	0.568	5.066	4.1e-07	7.8e-06	up	22	MOV10L1	50089879	50161690	Mov10 like RISC comp...	no	no	no	no
ENSG00000073150	63.445	-1.085	0.204	-5.314	1.1e-07	2.3e-06	down	22	PANX2	50170731	50180295	pannexin 2 [Source:H...	no	no	no	no
ENSG00000073464	117.291	1.027	0.274	3.749	0.00018	0.002	up	X	CLCN4	10156975	10237660	chloride voltage-gat...	no	no	no	yes
ENSG00000073756	2183.86	1.849	0.281	6.586	4.5e-11	1.9e-09	up	1	PTGS2	186671791	186680922	prostaglandin-endope...	no	no	no	no
ENSG00000074527	6391.52	3.37	0.638	5.283	1.3e-07	2.7e-06	up	12	NTN4	95657807	95791189	netrin 4 [Source:HGN...	no	no	no	no
ENSG00000075131	288.979	-0.698	0.205	-3.411	0.00065	0.005	down	15	TIPIN	66336191	66386746	TIMELESS interacting...	no	no	no	no
ENSG00000075275	112.811	3.65	0.5	7.301	2.9e-13	1.7e-11	up	22	CELSR1	46360834	46537620	cadherin EGF LAG sev...	no	no	no	no
ENSG00000075651	305.664	1.078	0.214	5.027	5e-07	9.4e-06	up	3	PLD1	171600404	171810950	phospholipase D1 [So...	no	no	no	no
ENSG00000076003	2274.15	-0.656	0.188	-3.485	0.00049	0.004	down	2	MCM6	135839626	135876443	minichromosome maint...	no	no	no	no
ENSG00000076248	1131.8	-0.671	0.159	-4.214	2.5e-05	0.0003	down	12	UNG	109097597	109126725	uracil DNA glycosyla...	no	no	no	no
ENSG00000076344	122.198	-1.753	0.233	-7.542	4.6e-14	3.1e-12	down	16	RGS11	268301	275980	regulator of G prote...	no	no	no	no
ENSG00000076351	135.014	-0.74	0.172	-4.296	1.7e-05	0.00022	down	17	SLC46A1	28394642	28407197	solute carrier famil...	no	no	no	no
ENSG00000076716	2290.82	-0.583	0.205	-2.853	0.004	0.024	down	X	GPC4	133300103	133415489	glypican 4 [Source:H...	no	no	no	yes
ENSG00000077157	1153.47	-1.129	0.257	-4.392	1.1e-05	0.00015	down	1	PPP1R12B	202348699	202592706	protein phosphatase ...	no	no	no	no
ENSG00000077942	14916.9	0.864	0.256	3.375	0.00074	0.006	up	22	FBLN1	45502238	45601135	fibulin 1 [Source:HG...	no	no	no	no
ENSG00000078018	238.903	2.766	0.205	13.474	2.2e-41	1.8e-38	up	2	MAP2	209424047	209734147	microtubule associat...	no	no	no	no
ENSG00000078053	1333.02	-0.618	0.209	-2.96	0.003	0.019	down	7	AMPH	38383704	38631420	amphiphysin [Source:...	no	no	no	no
ENSG00000078070	658.747	-0.705	0.151	-4.68	2.9e-06	4.5e-05	down	3	MCCC1	183015218	183116075	methylcrotonyl-CoA c...	no	no	no	no
ENSG00000078237	277.289	-0.668	0.136	-4.915	8.9e-07	1.6e-05	down	12	TIGAR	4307763	4360028	TP53 induced glycoly...	no	no	no	no
ENSG00000078401	783.254	-1.203	0.181	-6.655	2.8e-11	1.2e-09	down	6	EDN1	12290361	12297194	endothelin 1 [Source...	no	no	no	no
ENSG00000079257	169.313	1.427	0.286	4.99	6e-07	1.1e-05	up	3	LXN	158645822	158672648	latexin [Source:HGNC...	no	no	no	no
ENSG00000079335	99.63	-0.6	0.216	-2.779	0.005	0.029	down	1	CDC14A	100345001	100520277	cell division cycle ...	no	no	no	no
ENSG00000079841	489.866	-4.265	0.293	-14.563	4.8e-48	5.3e-45	down	6	RIMS1	71886550	72403150	regulating synaptic ...	no	no	no	no
ENSG00000080298	193.961	0.597	0.198	3.02	0.003	0.016	up	9	RFX3	3218297	3526004	regulatory factor X3...	no	no	no	no
ENSG00000080493	1076.37	-0.916	0.228	-4.018	5.9e-05	0.00065	down	4	SLC4A4	71062667	71572087	solute carrier famil...	no	no	no	no
ENSG00000080546	653.201	-0.621	0.124	-4.997	5.8e-07	1.1e-05	down	6	SESN1	108984309	109094846	sestrin 1 [Source:HG...	no	no	no	no
ENSG00000080839	705.417	-0.692	0.202	-3.421	0.00062	0.005	down	20	RBL1	36996349	37095997	RB transcriptional c...	no	no	no	no
ENSG00000080854	63.226	4.941	0.85	5.813	6.1e-09	1.7e-07	up	11	IGSF9B	133896438	133956968	immunoglobulin super...	no	no	no	no
ENSG00000081087	2006.63	-0.728	0.151	-4.826	1.4e-06	2.3e-05	down	6	OSTM1	108029245	108165854	osteoclastogenesis a...	no	no	no	no
ENSG00000081277	111.225	1.486	0.448	3.313	0.00092	0.007	up	1	PKP1	201283452	201332993	plakophilin 1 [Sourc...	no	no	no	no
ENSG00000081377	1558.58	-1.017	0.247	-4.112	3.9e-05	0.00045	down	9	CDC14B	96490241	96619843	cell division cycle ...	no	no	no	no
ENSG00000082126	107.63	1.277	0.198	6.465	1e-10	4e-09	up	2	MPP4	201644870	201698694	MAGUK p55 scaffold p...	no	no	no	no
ENSG00000082213	905.159	-0.588	0.161	-3.661	0.00025	0.002	down	5	C5orf22	31532287	31555053	chromosome 5 open re...	no	no	no	no
ENSG00000082438	1302.26	-1.956	0.22	-8.909	5.2e-19	6.7e-17	down	2	COBLL1	164653624	164843679	cordon-bleu WH2 repe...	no	no	no	no
ENSG00000082497	237.573	1.302	0.309	4.211	2.5e-05	0.0003	up	1	SERTAD4	210232796	210246631	SERTA domain contain...	no	no	no	no
ENSG00000083720	2068.96	-0.844	0.174	-4.853	1.2e-06	2.1e-05	down	5	OXCT1	41730065	41870425	3-oxoacid CoA-transf...	no	no	no	no
ENSG00000083857	26903.2	-0.661	0.239	-2.766	0.006	0.03	down	4	FAT1	186587794	186726722	FAT atypical cadheri...	no	no	no	no
ENSG00000084234	47727.3	-0.854	0.186	-4.597	4.3e-06	6.4e-05	down	11	APLP2	130068147	130144811	amyloid beta precurs...	no	no	no	no
ENSG00000084444	335.759	-0.587	0.211	-2.781	0.005	0.029	down	12	FAM234B	13044381	13142521	family with sequence...	no	no	no	no
ENSG00000084710	142.227	-1.043	0.278	-3.748	0.00018	0.002	down	2	EFR3B	25042076	25159135	EFR3 homolog B [Sour...	no	no	no	no
ENSG00000085117	296.799	0.724	0.272	2.658	0.008	0.04	up	11	CD82	44564427	44620358	CD82 molecule [Sourc...	no	no	no	no
ENSG00000085276	125.694	2.558	0.382	6.698	2.1e-11	9.3e-10	up	3	MECOM	169083499	169663775	MDS1 and EVI1 comple...	no	no	no	no
ENSG00000085840	220.156	-0.758	0.255	-2.968	0.003	0.018	down	1	ORC1	52372829	52404423	origin recognition c...	no	no	no	no
ENSG00000085871	123.194	1.283	0.222	5.782	7.4e-09	2e-07	up	4	MGST2	139665768	139740745	microsomal glutathio...	no	no	no	no
ENSG00000086289	1532.02	-1.186	0.317	-3.748	0.00018	0.002	down	7	EPDR1	37920640	37951936	ependymin related 1 ...	no	no	no	no
ENSG00000086570	38.616	-1.218	0.336	-3.624	0.00029	0.003	down	5	FAT2	151504092	151591331	FAT atypical cadheri...	no	no	no	no
ENSG00000086991	112.179	2.455	0.221	11.117	1e-28	3.4e-26	up	11	NOX4	89324353	89498187	NADPH oxidase 4 [Sou...	no	no	no	no
ENSG00000087076	343.226	-1.817	0.325	-5.587	2.3e-08	5.6e-07	down	19	HSD17B14	48813018	48836510	hydroxysteroid 17-be...	no	no	no	no
ENSG00000087510	745.053	0.703	0.179	3.928	8.6e-05	0.0009	up	20	TFAP2C	56629306	56639283	transcription factor...	no	no	no	no
ENSG00000087842	160.601	-1.322	0.234	-5.653	1.6e-08	4e-07	down	X	PIR	15384799	15493564	pirin [Source:HGNC S...	no	no	yes	no
ENSG00000088340	454.312	0.9	0.27	3.332	0.00086	0.006	up	20	FER1L4	35558737	35607562	fer-1 like family me...	no	no	no	no
ENSG00000088538	87.464	0.625	0.214	2.916	0.004	0.021	up	3	DOCK3	50674927	51384198	dedicator of cytokin...	no	no	no	no
ENSG00000088756	182.695	2.397	0.394	6.083	1.2e-09	3.8e-08	up	18	ARHGAP28	6729716	6915716	Rho GTPase activatin...	no	no	no	no
ENSG00000088826	587.731	0.803	0.15	5.354	8.6e-08	1.9e-06	up	20	SMOX	4120980	4187747	spermine oxidase [So...	no	no	no	no
ENSG00000088836	64.253	-1.079	0.263	-4.101	4.1e-05	0.00047	down	20	SLC4A11	3227417	3239559	solute carrier famil...	no	no	no	no
ENSG00000088881	81.989	3.413	0.382	8.943	3.8e-19	5.1e-17	up	20	EBF4	2692780	2760108	EBF family member 4 ...	no	no	no	no
ENSG00000088882	244.46	2.161	0.318	6.808	9.9e-12	4.6e-10	up	20	CPXM1	2794074	2800627	carboxypeptidase X, ...	no	no	no	no
ENSG00000089060	758.492	-0.64	0.217	-2.948	0.003	0.019	down	12	SLC8B1	113298759	113359493	solute carrier famil...	no	no	no	no
ENSG00000089127	95.091	4.636	1.625	2.853	0.004	0.024	up	12	OAS1	112905856	112933219	2'-5'-oligoadenylate...	no	no	no	no
ENSG00000090339	278.396	0.776	0.284	2.731	0.006	0.033	up	19	ICAM1	10271093	10286615	intercellular adhesi...	no	no	no	no
ENSG00000090376	469.674	-1.621	0.275	-5.883	4e-09	1.2e-07	down	12	IRAK3	66189195	66254622	interleukin 1 recept...	no	no	no	no
ENSG00000090539	82.984	1.173	0.262	4.474	7.7e-06	0.00011	up	3	CHRD	184380054	184390736	chordin [Source:HGNC...	no	no	no	no
ENSG00000090674	873.217	-0.947	0.242	-3.919	8.9e-05	0.00093	down	19	MCOLN1	7522624	7534009	mucolipin TRP cation...	no	no	no	no
ENSG00000091409	2601.47	-1.195	0.272	-4.396	1.1e-05	0.00015	down	2	ITGA6	172427354	172506459	integrin subunit alp...	no	no	no	no
ENSG00000091622	776.334	2.556	0.369	6.931	4.2e-12	2e-10	up	17	PITPNM3	6451263	6556555	PITPNM family member...	no	no	no	no
ENSG00000092068	1866.65	-1.394	0.43	-3.243	0.001	0.008	down	14	SLC7A8	23125295	23183674	solute carrier famil...	no	no	no	no
ENSG00000092470	656.333	-0.721	0.22	-3.28	0.001	0.008	down	15	WDR76	43826980	43868412	WD repeat domain 76 ...	no	no	no	no
ENSG00000093072	181.697	-1.765	0.189	-9.358	8.1e-21	1.3e-18	down	22	ADA2	17178790	17258235	adenosine deaminase ...	no	no	no	no
ENSG00000093217	356.756	-0.767	0.189	-4.056	5e-05	0.00056	down	3	XYLB	38346760	38421348	xylulokinase [Source...	no	no	no	no
ENSG00000094804	709.605	-0.757	0.248	-3.054	0.002	0.014	down	17	CDC6	40287879	40304657	cell division cycle ...	no	no	no	no
ENSG00000095203	82.19	-1.648	0.302	-5.454	4.9e-08	1.1e-06	down	9	EPB41L4B	109171974	109321059	erythrocyte membrane...	no	no	no	no
ENSG00000095209	289.441	-0.951	0.186	-5.111	3.2e-07	6.3e-06	down	9	TMEM38B	105694541	105776629	transmembrane protei...	no	no	no	no
ENSG00000095383	1247.5	-0.676	0.108	-6.278	3.4e-10	1.2e-08	down	9	TBC1D2	98199011	98255649	TBC1 domain family m...	no	no	no	no
ENSG00000095397	270.185	0.934	0.287	3.257	0.001	0.008	up	9	WHRN	114402080	114505473	whirlin [Source:HGNC...	no	no	no	no
ENSG00000095637	43.818	-1.109	0.277	-3.997	6.4e-05	0.0007	down	10	SORBS1	95311771	95561414	sorbin and SH3 domai...	no	no	no	no
ENSG00000095739	381.847	-1.097	0.158	-6.931	4.2e-12	2e-10	down	10	BAMBI	28677510	28682932	BMP and activin memb...	no	no	no	no
ENSG00000095752	641.573	1.273	0.18	7.069	1.6e-12	8.3e-11	up	19	IL11	55364382	55370463	interleukin 11 [Sour...	no	no	no	no
ENSG00000096060	482.827	-1.267	0.303	-4.178	2.9e-05	0.00035	down	6	FKBP5	35573585	35728583	FKBP prolyl isomeras...	no	no	no	no
ENSG00000096433	3885.85	-1.129	0.169	-6.7	2.1e-11	9.2e-10	down	6	ITPR3	33620365	33696574	inositol 1,4,5-trisp...	no	no	no	no
ENSG00000099194	9433.78	0.687	0.157	4.366	1.3e-05	0.00017	up	10	SCD	100347233	100364826	stearoyl-CoA desatur...	no	no	no	no
ENSG00000099204	1186.66	2.54	0.414	6.136	8.5e-10	2.8e-08	up	10	ABLIM1	114431112	114768061	actin binding LIM pr...	no	no	no	no
ENSG00000099260	202.621	1.961	0.435	4.508	6.5e-06	9.3e-05	up	1	PALMD	99646113	99694541	palmdelphin [Source:...	no	no	no	no
ENSG00000099337	1424.48	-1.032	0.228	-4.533	5.8e-06	8.4e-05	down	19	KCNK6	38319845	38332076	potassium two pore d...	no	no	no	no
ENSG00000099365	443.103	1.12	0.243	4.616	3.9e-06	5.9e-05	up	16	STX1B	30989256	31010638	syntaxin 1B [Source:...	no	no	no	no
ENSG00000099725	2447.37	1.751	0.197	8.901	5.5e-19	7.1e-17	up	Y	PRKY	7273972	7381548	protein kinase Y-lin...	no	no	no	no
ENSG00000099849	91.424	0.611	0.199	3.072	0.002	0.014	up	11	RASSF7	560404	564025	Ras association doma...	no	no	no	no
ENSG00000099864	185.725	4.29	0.623	6.891	5.5e-12	2.6e-10	up	19	PALM	708935	748329	paralemmin [Source:H...	no	no	no	no
ENSG00000099889	283.924	-3.153	0.27	-11.665	1.9e-31	7.5e-29	down	22	ARVCF	19969896	20016823	ARVCF delta catenin ...	no	no	no	no
ENSG00000099998	132.394	3.762	0.591	6.367	1.9e-10	7.2e-09	up	22	GGT5	24219654	24245108	gamma-glutamyltransf...	no	no	no	no
ENSG00000100065	320.232	1.533	0.271	5.66	1.5e-08	3.9e-07	up	22	CARD10	37490362	37519542	caspase recruitment ...	no	no	no	no
ENSG00000100077	55.682	1.483	0.357	4.149	3.3e-05	0.00039	up	22	GRK3	25564675	25729294	G protein-coupled re...	no	no	no	no
ENSG00000100100	414.208	-0.766	0.238	-3.224	0.001	0.009	down	22	PIK3IP1	31281594	31292534	phosphoinositide-3-k...	no	no	no	no
ENSG00000100181	33.535	8.117	1.114	7.285	3.2e-13	1.9e-11	up	22	TPTEP1	16637040	16638740	TPTE pseudogene 1 [S...	no	no	no	no
ENSG00000100206	74.532	-1.032	0.369	-2.798	0.005	0.028	down	22	DMC1	38518948	38570204	DNA meiotic recombin...	no	no	no	no
ENSG00000100234	44874	-1.728	0.221	-7.817	5.4e-15	3.9e-13	down	22	TIMP3	32801705	32863041	TIMP metallopeptidas...	no	no	no	no
ENSG00000100284	2438.66	-0.672	0.225	-2.986	0.003	0.017	down	22	TOM1	35299275	35347992	target of myb1 membr...	no	no	no	no
ENSG00000100285	135.289	1.527	0.416	3.666	0.00025	0.002	up	22	NEFH	29480218	29491390	neurofilament heavy ...	no	no	no	no
ENSG00000100292	11718.8	-1.889	0.344	-5.497	3.9e-08	9e-07	down	22	HMOX1	35380361	35394214	heme oxygenase 1 [So...	no	no	no	no
ENSG00000100300	5518.87	-0.62	0.163	-3.805	0.00014	0.001	down	22	TSPO	43151547	43163242	translocator protein...	no	no	no	no
ENSG00000100302	575.223	-2.296	0.305	-7.526	5.2e-14	3.4e-12	down	22	RASD2	35540831	35553999	RASD family member 2...	no	no	no	no
ENSG00000100439	1891.18	-0.759	0.206	-3.68	0.00023	0.002	down	14	ABHD4	22598290	22612963	abhydrolase domain c...	no	no	no	no
ENSG00000100479	187.285	-0.661	0.24	-2.752	0.006	0.032	down	14	POLE2	49643555	49688422	DNA polymerase epsil...	no	no	no	no
ENSG00000100490	308.922	-1.644	0.26	-6.31	2.8e-10	1e-08	down	14	CDKL1	50326265	50416461	cyclin dependent kin...	no	no	no	no
ENSG00000100558	395.778	-0.959	0.266	-3.601	0.00032	0.003	down	14	PLEK2	67386984	67412167	pleckstrin 2 [Source...	no	no	no	no
ENSG00000100605	1148.78	-0.697	0.084	-8.309	9.7e-17	9e-15	down	14	ITPK1	92936914	93116320	inositol-tetrakispho...	no	no	no	no
ENSG00000100625	535.395	1.334	0.17	7.828	5e-15	3.6e-13	up	14	SIX4	60709539	60724351	SIX homeobox 4 [Sour...	no	no	no	no
ENSG00000100714	2673.77	-0.816	0.187	-4.365	1.3e-05	0.00017	down	14	MTHFD1	64388031	64463457	methylenetetrahydrof...	no	no	no	no
ENSG00000100739	468.621	0.591	0.211	2.798	0.005	0.028	up	14	BDKRB1	96256210	96268967	bradykinin receptor ...	no	no	no	no
ENSG00000100767	97.375	0.637	0.237	2.693	0.007	0.036	up	14	PAPLN	73237497	73274640	papilin, proteoglyca...	no	no	no	no
ENSG00000100889	3337.13	0.908	0.229	3.968	7.2e-05	0.00078	up	14	PCK2	24094053	24110598	phosphoenolpyruvate ...	no	no	no	no
ENSG00000100918	232.62	0.825	0.236	3.498	0.00047	0.004	up	14	REC8	24171853	24180257	REC8 meiotic recombi...	no	no	no	no
ENSG00000100997	2573.2	-0.615	0.201	-3.061	0.002	0.014	down	20	ABHD12	25294742	25390835	abhydrolase domain c...	no	no	no	no
ENSG00000101000	527.492	-0.884	0.134	-6.593	4.3e-11	1.8e-09	down	20	PROCR	35172072	35216240	protein C receptor [...	no	no	no	no
ENSG00000101017	151.802	0.651	0.229	2.837	0.005	0.025	up	20	CD40	46118271	46129863	CD40 molecule [Sourc...	no	no	no	no
ENSG00000101096	106.066	1.654	0.187	8.841	9.5e-19	1.2e-16	up	20	NFATC2	51386957	51562831	nuclear factor of ac...	no	no	no	no
ENSG00000101115	46.84	6.584	0.859	7.664	1.8e-14	1.2e-12	up	20	SALL4	51782331	51802521	spalt like transcrip...	no	no	no	no
ENSG00000101134	915.278	-0.838	0.229	-3.667	0.00025	0.002	down	20	DOK5	54475593	54651169	docking protein 5 [S...	no	no	no	no
ENSG00000101412	615.005	-0.768	0.278	-2.759	0.006	0.031	down	20	E2F1	33675477	33686385	E2F transcription fa...	no	no	no	no
ENSG00000101463	302.305	-0.828	0.161	-5.131	2.9e-07	5.7e-06	down	20	SYNDIG1	24469629	24666616	synapse differentiat...	no	no	no	no
ENSG00000101605	52.013	1.48	0.375	3.942	8.1e-05	0.00086	up	18	MYOM1	3066807	3219968	myomesin 1 [Source:H...	no	no	no	no
ENSG00000101670	231.779	6.4	0.741	8.632	6e-18	6.7e-16	up	18	LIPG	49560699	49599185	lipase G, endothelia...	no	no	no	no
ENSG00000101680	289.924	-0.872	0.27	-3.225	0.001	0.009	down	18	LAMA1	6941742	7117797	laminin subunit alph...	no	no	no	no
ENSG00000101773	1205.3	-0.674	0.195	-3.455	0.00055	0.004	down	18	RBBP8	22798261	23026488	RB binding protein 8...	no	no	no	no
ENSG00000101846	1390.45	-1.013	0.125	-8.117	4.8e-16	3.9e-14	down	X	STS	7147237	7804358	steroid sulfatase [S...	no	yes	no	no
ENSG00000101868	779.043	-0.603	0.191	-3.163	0.002	0.011	down	X	POLA1	24693873	24996986	DNA polymerase alpha...	no	no	no	yes
ENSG00000101871	878.488	-0.968	0.246	-3.936	8.3e-05	0.00088	down	X	MID1	10445310	10833654	midline 1 [Source:HG...	no	no	no	yes
ENSG00000102032	160.981	-2.223	0.358	-6.215	5.1e-10	1.8e-08	down	X	RENBP	153935269	153944687	renin binding protei...	no	yes	no	no
ENSG00000102057	290.674	1.275	0.228	5.587	2.3e-08	5.6e-07	up	X	KCND1	48961378	48971844	potassium voltage-ga...	no	no	no	yes
ENSG00000102144	29140.3	0.644	0.15	4.309	1.6e-05	0.00021	up	X	PGK1	77910739	78129295	phosphoglycerate kin...	no	no	no	yes
ENSG00000102174	70.209	2.058	0.36	5.716	1.1e-08	2.9e-07	up	X	PHEX	22032325	22494713	phosphate regulating...	no	no	yes	no
ENSG00000102359	1494.6	0.809	0.133	6.063	1.3e-09	4.2e-08	up	X	SRPX2	100644195	100675788	sushi repeat contain...	no	no	yes	no
ENSG00000102393	646.609	-0.608	0.199	-3.05	0.002	0.015	down	X	GLA	101393273	101408012	galactosidase alpha ...	no	no	no	yes
ENSG00000102409	610.51	1.175	0.289	4.064	4.8e-05	0.00054	up	X	BEX4	103215108	103217246	brain expressed X-li...	no	no	no	yes
ENSG00000102445	174.074	3.848	0.205	18.733	2.7e-78	1.8e-74	up	13	RUBCNL	46334681	46438190	rubicon like autopha...	no	no	no	no
ENSG00000102452	206.353	-1.03	0.141	-7.308	2.7e-13	1.6e-11	down	13	NALCN	101053776	101416508	sodium leak channel,...	no	no	no	no
ENSG00000102466	466.745	-0.666	0.185	-3.599	0.00032	0.003	down	13	FGF14	101710804	102402457	fibroblast growth fa...	no	no	no	no
ENSG00000102468	127.31	-1.511	0.452	-3.342	0.00083	0.006	down	13	HTR2A	46831546	46897076	5-hydroxytryptamine ...	no	no	no	no
ENSG00000102575	247.122	-1.942	0.31	-6.264	3.8e-10	1.3e-08	down	19	ACP5	11574653	11579993	acid phosphatase 5, ...	no	no	no	no
ENSG00000102755	882.731	3.405	0.551	6.182	6.3e-10	2.1e-08	up	13	FLT1	28300346	28495145	fms related receptor...	no	no	no	no
ENSG00000102802	1164.96	0.783	0.142	5.517	3.4e-08	8.1e-07	up	13	MEDAG	30906271	30925572	mesenteric estrogen ...	no	no	no	no
ENSG00000102878	230.697	-0.821	0.242	-3.398	0.00068	0.005	down	16	HSF4	67164681	67169945	heat shock transcrip...	no	no	no	no
ENSG00000102890	88.612	0.7	0.176	3.985	6.7e-05	0.00073	up	16	ELMO3	67199111	67204029	engulfment and cell ...	no	no	no	no
ENSG00000102935	322.543	2.511	0.402	6.254	4e-10	1.4e-08	up	16	ZNF423	49487524	49857919	zinc finger protein ...	no	no	no	no
ENSG00000102996	167.012	-1.368	0.253	-5.414	6.2e-08	1.4e-06	down	16	MMP15	58025754	58046901	matrix metallopeptid...	no	no	no	no
ENSG00000103034	432.402	1.53	0.202	7.565	3.9e-14	2.6e-12	up	16	NDRG4	58462846	58513628	NDRG family member 4...	no	no	no	no
ENSG00000103047	940.144	-1.234	0.143	-8.626	6.4e-18	7e-16	down	16	TANGO6	68843531	69085182	transport and golgi ...	no	no	no	no
ENSG00000103066	1493.47	-1.057	0.247	-4.273	1.9e-05	0.00024	down	16	PLA2G15	68245304	68261058	phospholipase A2 gro...	no	no	no	no
ENSG00000103187	13418.1	0.583	0.147	3.974	7.1e-05	0.00076	up	16	COTL1	84565596	84618078	coactosin like F-act...	no	no	no	no
ENSG00000103241	185.269	3.404	1.232	2.762	0.006	0.031	up	16	FOXF1	86510527	86515422	forkhead box F1 [Sou...	no	no	no	no
ENSG00000103249	2573.97	-0.794	0.197	-4.033	5.5e-05	0.00061	down	16	CLCN7	1444934	1475077	chloride voltage-gat...	no	no	no	no
ENSG00000103257	7516.54	1.253	0.247	5.064	4.1e-07	7.9e-06	up	16	SLC7A5	87830023	87869507	solute carrier famil...	no	no	no	no
ENSG00000103381	1915.44	-0.605	0.075	-8.11	5e-16	4.1e-14	down	16	CPPED1	12659799	12803887	calcineurin like pho...	no	no	no	no
ENSG00000103449	1065.61	0.855	0.218	3.926	8.6e-05	0.00091	up	16	SALL1	51135982	51152334	spalt like transcrip...	no	no	no	no
ENSG00000103742	714.163	1.561	0.248	6.284	3.3e-10	1.2e-08	up	15	IGDCC4	65381484	65422947	immunoglobulin super...	no	no	no	no
ENSG00000103888	25058	-0.743	0.256	-2.899	0.004	0.022	down	15	CEMIP	80779343	80951776	cell migration induc...	no	no	no	no
ENSG00000103966	2040.1	-0.64	0.128	-5.014	5.3e-07	1e-05	down	15	EHD4	41895933	41972557	EH domain containing...	no	no	no	no
ENSG00000104043	63.681	1.179	0.352	3.351	0.00081	0.006	up	15	ATP8B4	49858238	50182817	ATPase phospholipid ...	no	no	no	no
ENSG00000104081	524.918	1.428	0.272	5.246	1.6e-07	3.2e-06	up	15	BMF	40087890	40108892	Bcl2 modifying facto...	no	no	no	no
ENSG00000104219	1033.56	-0.994	0.137	-7.267	3.7e-13	2.1e-11	down	8	ZDHHC2	17156482	17224799	zinc finger DHHC-typ...	no	no	no	no
ENSG00000104356	685.471	-0.623	0.21	-2.969	0.003	0.018	down	8	POP1	98117293	98159835	POP1 homolog, ribonu...	no	no	no	no
ENSG00000104368	1257.31	1.182	0.122	9.716	2.6e-22	5.1e-20	up	8	PLAT	42174718	42207709	plasminogen activato...	no	no	no	no
ENSG00000104381	303.506	0.665	0.142	4.671	3e-06	4.7e-05	up	8	GDAP1	74320613	74518007	ganglioside induced ...	no	no	no	no
ENSG00000104419	9212.37	0.586	0.204	2.876	0.004	0.023	up	8	NDRG1	133237175	133302022	N-myc downstream reg...	no	no	no	no
ENSG00000104490	581.88	-1.57	0.188	-8.365	6e-17	5.8e-15	down	8	NCALD	101686542	102124907	neurocalcin delta [S...	no	no	no	no
ENSG00000104689	160.214	-0.814	0.191	-4.269	2e-05	0.00024	down	8	TNFRSF10A	23190452	23225102	TNF receptor superfa...	no	no	no	no
ENSG00000104722	185.49	1.584	0.512	3.093	0.002	0.013	up	8	NEFM	24913758	24919098	neurofilament medium...	no	no	no	no
ENSG00000104763	4287.48	-0.905	0.187	-4.842	1.3e-06	2.2e-05	down	8	ASAH1	18055992	18084998	N-acylsphingosine am...	no	no	no	no
ENSG00000104783	135.354	0.915	0.296	3.092	0.002	0.013	up	19	KCNN4	43766533	43780976	potassium calcium-ac...	no	no	no	no
ENSG00000104998	148.933	-0.647	0.243	-2.656	0.008	0.04	down	19	IL27RA	14031762	14053218	interleukin 27 recep...	no	no	no	no
ENSG00000105088	2058.79	1.404	0.484	2.899	0.004	0.022	up	19	OLFM2	9853718	9936515	olfactomedin 2 [Sour...	no	no	no	no
ENSG00000105255	213.17	1.303	0.289	4.503	6.7e-06	9.5e-05	up	19	FSD1	4304598	4323843	fibronectin type III...	no	no	no	no
ENSG00000105339	634.536	-1.257	0.198	-6.359	2e-10	7.5e-09	down	8	DENND3	141117278	141195808	DENN domain containi...	no	no	no	no
ENSG00000105376	77.316	1.195	0.401	2.981	0.003	0.018	up	19	ICAM5	10289952	10296778	intercellular adhesi...	no	no	no	no
ENSG00000105464	492.028	-1.263	0.146	-8.632	6e-18	6.7e-16	down	19	GRIN2D	48393668	48444931	glutamate ionotropic...	no	no	no	no
ENSG00000105516	172.511	0.681	0.194	3.518	0.00043	0.004	up	19	DBP	48630030	48637379	D-box binding PAR bZ...	no	no	no	no
ENSG00000105605	27.822	4.518	1.391	3.248	0.001	0.008	up	19	CACNG7	53909278	53943950	calcium voltage-gate...	no	no	no	no
ENSG00000105612	1888.97	-0.59	0.202	-2.917	0.004	0.021	down	19	DNASE2	12875209	12881595	deoxyribonuclease 2,...	no	no	no	no
ENSG00000105619	391.343	-0.622	0.183	-3.398	0.00068	0.005	down	19	TFPT	54107020	54115657	TCF3 fusion partner ...	no	no	no	no
ENSG00000105639	148.963	0.724	0.255	2.837	0.005	0.025	up	19	JAK3	17824780	17848071	Janus kinase 3 [Sour...	no	no	no	no
ENSG00000105711	327.289	1.079	0.205	5.271	1.4e-07	2.8e-06	up	19	SCN1B	35030470	35040449	sodium voltage-gated...	no	no	no	no
ENSG00000105755	504.595	0.684	0.159	4.31	1.6e-05	0.00021	up	19	ETHE1	43506719	43527230	ETHE1 persulfide dio...	no	no	no	no
ENSG00000105808	139.928	0.662	0.217	3.046	0.002	0.015	up	7	RASA4	102579646	102616756	RAS p21 protein acti...	no	no	no	no
ENSG00000105810	4644.74	0.674	0.142	4.741	2.1e-06	3.4e-05	up	7	CDK6	92604921	92836573	cyclin dependent kin...	no	no	no	no
ENSG00000105855	375.703	1.302	0.421	3.09	0.002	0.013	up	7	ITGB8	20330702	20415754	integrin subunit bet...	no	no	no	no
ENSG00000105889	310.355	-2.031	0.306	-6.644	3e-11	1.3e-09	down	7	STEAP1B	22419444	22727613	STEAP family member ...	no	no	no	no
ENSG00000105894	1533.59	1.76	0.286	6.154	7.5e-10	2.5e-08	up	7	PTN	137227341	137343774	pleiotrophin [Source...	no	no	no	no
ENSG00000105953	5204.98	-0.592	0.181	-3.273	0.001	0.008	down	7	OGDH	44606572	44709066	oxoglutarate dehydro...	no	no	no	no
ENSG00000105989	886.092	3.286	0.454	7.233	4.7e-13	2.6e-11	up	7	WNT2	117275451	117323152	Wnt family member 2 ...	no	no	no	no
ENSG00000105991	69.199	-1.212	0.359	-3.371	0.00075	0.006	down	7	HOXA1	27092993	27096000	homeobox A1 [Source:...	no	no	no	no
ENSG00000106003	586.942	-1.737	0.273	-6.374	1.8e-10	6.9e-09	down	7	LFNG	2512529	2529177	LFNG O-fucosylpeptid...	no	no	no	no
ENSG00000106025	33.53	-0.988	0.341	-2.896	0.004	0.022	down	7	TSPAN12	120787320	120858402	tetraspanin 12 [Sour...	no	no	no	no
ENSG00000106089	546.938	0.801	0.197	4.056	5e-05	0.00056	up	7	STX1A	73699206	73719672	syntaxin 1A [Source:...	no	no	no	no
ENSG00000106123	245.362	-1.923	0.555	-3.465	0.00053	0.004	down	7	EPHB6	142855061	142871094	EPH receptor B6 [Sou...	no	no	no	no
ENSG00000106236	33.838	3.168	0.386	8.204	2.3e-16	2e-14	up	7	NPTX2	98617285	98629869	neuronal pentraxin 2...	no	no	no	no
ENSG00000106351	329.915	-0.584	0.105	-5.547	2.9e-08	6.9e-07	down	7	AGFG2	100539203	100568220	ArfGAP with FG repea...	no	no	no	no
ENSG00000106404	335.547	-0.674	0.194	-3.469	0.00052	0.004	down	7	CLDN15	101232092	101238820	claudin 15 [Source:H...	no	no	no	no
ENSG00000106484	863.355	3.602	0.356	10.125	4.3e-24	9.7e-22	up	7	MEST	130486171	130506465	mesoderm specific tr...	no	no	no	no
ENSG00000106511	159.105	-2.345	0.672	-3.491	0.00048	0.004	down	7	MEOX2	15611212	15686683	mesenchyme homeobox ...	no	no	no	no
ENSG00000106538	249.227	4.296	1.471	2.92	0.003	0.021	up	7	RARRES2	150338317	150341662	retinoic acid recept...	no	no	no	no
ENSG00000106714	32.06	21.845	2.64	8.276	1.3e-16	1.1e-14	up	9	CNTNAP3	39064710	39288315	contactin associated...	no	no	no	no
ENSG00000106772	2050.92	2.105	0.31	6.786	1.1e-11	5.3e-10	up	9	PRUNE2	76611376	76906114	prune homolog 2 with...	no	no	no	no
ENSG00000106780	1008.53	-0.716	0.128	-5.58	2.4e-08	5.8e-07	down	9	MEGF9	120600811	120714470	multiple EGF like do...	no	no	no	no
ENSG00000106789	78.841	0.631	0.217	2.902	0.004	0.022	up	9	CORO2A	98120975	98192637	coronin 2A [Source:H...	no	no	no	no
ENSG00000106823	679.109	-0.99	0.288	-3.431	0.0006	0.005	down	9	ECM2	92493554	92536655	extracellular matrix...	no	no	no	no
ENSG00000107159	70.49	2.676	0.596	4.489	7.1e-06	0.0001	up	9	CA9	35673928	35681159	carbonic anhydrase 9...	no	no	no	no
ENSG00000107201	915.412	0.965	0.291	3.32	0.0009	0.007	up	9	RIGI	32455302	32526208	RNA sensor RIG-I [So...	no	no	no	no
ENSG00000107249	862.621	1.167	0.206	5.659	1.5e-08	3.9e-07	up	9	GLIS3	3824127	4348392	GLIS family zinc fin...	no	no	no	no
ENSG00000107282	368.114	-0.93	0.133	-7.014	2.3e-12	1.2e-10	down	9	APBA1	69427532	69672371	amyloid beta precurs...	no	no	no	no
ENSG00000107331	2668.33	-0.898	0.206	-4.356	1.3e-05	0.00017	down	9	ABCA2	137007234	137028915	ATP binding cassette...	no	no	no	no
ENSG00000107560	2418.57	-0.622	0.23	-2.703	0.007	0.035	down	10	RAB11FIP2	118004916	118046941	RAB11 family interac...	no	no	no	no
ENSG00000107562	22077.1	-1.016	0.175	-5.794	6.9e-09	1.9e-07	down	10	CXCL12	44370165	44386493	C-X-C motif chemokin...	no	no	no	no
ENSG00000107566	3931.86	-0.711	0.171	-4.154	3.3e-05	0.00038	down	10	ERLIN1	100150094	100186033	ER lipid raft associ...	no	no	no	no
ENSG00000107738	2382.88	-0.793	0.236	-3.36	0.00078	0.006	down	10	VSIR	71747556	71773520	V-set immunoregulato...	no	no	no	no
ENSG00000107984	12427.1	-1.355	0.195	-6.958	3.4e-12	1.7e-10	down	10	DKK1	52314281	52318042	dickkopf WNT signali...	no	no	no	no
ENSG00000108001	194.658	1.753	0.442	3.964	7.4e-05	0.00079	up	10	EBF3	129835233	129973053	EBF transcription fa...	no	no	no	no
ENSG00000108370	58.56	1.167	0.361	3.238	0.001	0.009	up	17	RGS9	65100812	65227703	regulator of G prote...	no	no	no	no
ENSG00000108439	387.938	-0.744	0.173	-4.309	1.6e-05	0.00021	down	17	PNPO	47941506	47949308	pyridoxamine 5'-phos...	no	no	no	no
ENSG00000108448	436.07	-0.775	0.263	-2.942	0.003	0.019	down	17	TRIM16L	18722237	18735460	tripartite motif con...	no	no	no	no
ENSG00000108556	38.845	-2.246	0.349	-6.434	1.2e-10	4.8e-09	down	17	CHRNE	4897771	4934438	cholinergic receptor...	no	no	no	no
ENSG00000108679	3865.61	-0.827	0.287	-2.88	0.004	0.023	down	17	LGALS3BP	78971238	78979947	galectin 3 binding p...	no	no	no	no
ENSG00000108691	270.148	1.333	0.226	5.907	3.5e-09	1e-07	up	17	CCL2	34255274	34257208	C-C motif chemokine ...	no	no	no	no
ENSG00000108784	2391.44	-0.627	0.206	-3.036	0.002	0.015	down	17	NAGLU	42536241	42544449	N-acetyl-alpha-gluco...	no	no	no	no
ENSG00000108823	89.974	-1.331	0.417	-3.191	0.001	0.01	down	17	SGCA	50164214	50175928	sarcoglycan alpha [S...	no	no	no	no
ENSG00000108828	17959.7	-0.67	0.211	-3.171	0.002	0.01	down	17	VAT1	43014607	43025123	vesicle amine transp...	no	no	no	no
ENSG00000108861	3143.35	-0.684	0.181	-3.787	0.00015	0.001	down	17	DUSP3	43766125	43778977	dual specificity pho...	no	no	no	no
ENSG00000109016	489.973	-0.683	0.168	-4.076	4.6e-05	0.00052	down	17	DHRS7B	21123364	21193265	dehydrogenase/reduct...	no	no	no	no
ENSG00000109066	2079.43	-0.702	0.206	-3.401	0.00067	0.005	down	17	TMEM104	74776499	74839753	transmembrane protei...	no	no	no	no
ENSG00000109099	4954.7	-0.735	0.156	-4.714	2.4e-06	3.9e-05	down	17	PMP22	15229773	15272292	peripheral myelin pr...	no	no	no	no
ENSG00000109323	1587.38	-0.99	0.085	-11.693	1.4e-31	5.6e-29	down	4	MANBA	102630770	102760994	mannosidase beta [So...	no	no	no	no
ENSG00000109586	991.406	-0.791	0.141	-5.615	2e-08	4.9e-07	down	4	GALNT7	173168811	173323967	polypeptide N-acetyl...	no	no	no	no
ENSG00000109610	910.829	-0.884	0.284	-3.115	0.002	0.012	down	4	SOD3	24789912	24800842	superoxide dismutase...	no	no	no	no
ENSG00000109674	207.144	-0.767	0.27	-2.842	0.004	0.025	down	4	NEIL3	177309874	177362936	nei like DNA glycosy...	no	no	no	no
ENSG00000109738	321.029	-0.727	0.214	-3.399	0.00068	0.005	down	4	GLRB	157076125	157172090	glycine receptor bet...	no	no	no	no
ENSG00000109790	2182.72	0.834	0.202	4.138	3.5e-05	0.0004	up	4	KLHL5	39045039	39126857	kelch like family me...	no	no	no	no
ENSG00000109794	81.775	-1.123	0.211	-5.331	9.8e-08	2.1e-06	down	4	FAM149A	186104419	186175337	family with sequence...	no	no	no	no
ENSG00000109846	10347.6	-0.843	0.225	-3.751	0.00018	0.002	down	11	CRYAB	111908564	111923722	crystallin alpha B [...	no	no	no	no
ENSG00000109944	431.776	-0.595	0.165	-3.603	0.00031	0.003	down	11	JHY	122882683	122963862	junctional cadherin ...	no	no	no	no
ENSG00000110002	262.308	0.78	0.253	3.084	0.002	0.013	up	11	VWA5A	124115404	124147721	von Willebrand facto...	no	no	no	no
ENSG00000110076	346.618	-1.906	0.345	-5.523	3.3e-08	7.9e-07	down	11	NRXN2	64606174	64723197	neurexin 2 [Source:H...	no	no	no	no
ENSG00000110090	3238.47	-0.734	0.099	-7.409	1.3e-13	7.9e-12	down	11	CPT1A	68754620	68844410	carnitine palmitoylt...	no	no	no	no
ENSG00000110092	23262.8	-0.681	0.206	-3.313	0.00092	0.007	down	11	CCND1	69641156	69654474	cyclin D1 [Source:HG...	no	no	no	no
ENSG00000110400	715.043	-0.654	0.24	-2.723	0.006	0.034	down	11	NECTIN1	119623408	119729200	nectin cell adhesion...	no	no	no	no
ENSG00000110436	176.877	1.303	0.203	6.427	1.3e-10	5e-09	up	11	SLC1A2	35251205	35420063	solute carrier famil...	no	no	no	no
ENSG00000110446	239.175	-0.661	0.189	-3.497	0.00047	0.004	down	11	SLC15A3	60937060	60952653	solute carrier famil...	no	no	no	no
ENSG00000110756	1488.01	-1.034	0.175	-5.906	3.5e-09	1e-07	down	11	HPS5	18278668	18322198	HPS5 biogenesis of l...	no	no	no	no
ENSG00000110881	532.813	0.681	0.222	3.069	0.002	0.014	up	12	ASIC1	50057548	50083611	acid sensing ion cha...	no	no	no	no
ENSG00000110900	284.495	1.288	0.45	2.863	0.004	0.024	up	12	TSPAN11	30926428	30996602	tetraspanin 11 [Sour...	no	no	no	no
ENSG00000111012	55.222	1.092	0.246	4.429	9.5e-06	0.00013	up	12	CYP27B1	57762334	57768986	cytochrome P450 fami...	no	no	no	no
ENSG00000111057	321.072	2.014	0.366	5.502	3.7e-08	8.8e-07	up	12	KRT18	52948871	52952906	keratin 18 [Source:H...	no	no	no	no
ENSG00000111087	234.34	0.789	0.231	3.408	0.00066	0.005	up	12	GLI1	57459785	57472268	GLI family zinc fing...	no	no	no	no
ENSG00000111261	159.933	-0.851	0.173	-4.908	9.2e-07	1.6e-05	down	12	MANSC1	12326056	12350242	MANSC domain contain...	no	no	no	no
ENSG00000111331	1137.02	1.193	0.294	4.055	5e-05	0.00056	up	12	OAS3	112938051	112976460	2'-5'-oligoadenylate...	no	no	no	no
ENSG00000111348	479.137	-1.286	0.22	-5.845	5.1e-09	1.4e-07	down	12	ARHGDIB	14942031	14961728	Rho GDP dissociation...	no	no	no	no
ENSG00000111669	34939.8	0.617	0.156	3.956	7.6e-05	0.00081	up	12	TPI1	6867119	6870948	triosephosphate isom...	no	no	no	no
ENSG00000111674	4344.52	0.82	0.214	3.842	0.00012	0.001	up	12	ENO2	6913745	6923698	enolase 2 [Source:HG...	no	no	no	no
ENSG00000111801	732.406	-0.667	0.104	-6.446	1.1e-10	4.5e-09	down	6	BTN3A3	26440472	26453415	butyrophilin subfami...	no	no	no	no
ENSG00000111816	66.797	-0.819	0.229	-3.569	0.00036	0.003	down	6	FRK	115931149	116060891	fyn related Src fami...	no	no	no	no
ENSG00000111859	1858.78	-0.797	0.206	-3.865	0.00011	0.001	down	6	NEDD9	11183298	11382348	neural precursor cel...	no	no	no	no
ENSG00000111907	630.743	-1.04	0.297	-3.499	0.00047	0.004	down	6	TPD52L1	125119049	125264407	TPD52 like 1 [Source...	no	no	no	no
ENSG00000112078	6132.38	-0.9	0.219	-4.107	4e-05	0.00046	down	6	KCTD20	36442767	36491143	potassium channel te...	no	no	no	no
ENSG00000112079	5109.39	-0.913	0.212	-4.3	1.7e-05	0.00021	down	6	STK38	36493892	36547479	serine/threonine kin...	no	no	no	no
ENSG00000112139	839.594	-1.073	0.198	-5.426	5.8e-08	1.3e-06	down	6	MDGA1	37630679	37699306	MAM domain containin...	no	no	no	no
ENSG00000112182	58.009	3.489	0.323	10.819	2.8e-27	8.4e-25	up	6	BACH2	89926528	90296843	BTB domain and CNC h...	no	no	no	no
ENSG00000112218	21.799	-2.222	0.531	-4.184	2.9e-05	0.00034	down	6	GPR63	96794125	96837477	G protein-coupled re...	no	no	no	no
ENSG00000112276	1602.47	-0.682	0.135	-5.05	4.4e-07	8.4e-06	down	6	BVES	105096822	105137157	blood vessel epicard...	no	no	no	no
ENSG00000112297	1146.62	1.054	0.184	5.742	9.3e-09	2.5e-07	up	6	CRYBG1	106360717	106572017	crystallin beta-gamm...	no	no	no	no
ENSG00000112320	58.368	-1.798	0.193	-9.293	1.5e-20	2.4e-18	down	6	SOBP	107490106	107661306	sine oculis binding ...	no	no	no	no
ENSG00000112378	2666.86	-0.63	0.166	-3.798	0.00015	0.001	down	6	PERP	138088505	138107419	p53 apoptosis effect...	no	no	no	no
ENSG00000112379	47.643	1.897	0.49	3.869	0.00011	0.001	up	6	ARFGEF3	138161939	138344663	ARFGEF family member...	no	no	no	no
ENSG00000112419	3042.72	-0.761	0.167	-4.545	5.5e-06	8e-05	down	6	PHACTR2	143536845	143831185	phosphatase and acti...	no	no	no	no
ENSG00000112619	81.62	-1.256	0.201	-6.263	3.8e-10	1.3e-08	down	6	PRPH2	42696598	42722597	peripherin 2 [Source...	no	no	no	no
ENSG00000112655	17946.7	0.624	0.227	2.744	0.006	0.032	up	6	PTK7	43076307	43161719	protein tyrosine kin...	no	no	no	no
ENSG00000112715	11898.1	0.971	0.292	3.322	0.0009	0.007	up	6	VEGFA	43770184	43786487	vascular endothelial...	no	no	no	no
ENSG00000112759	486.66	-1.476	0.159	-9.27	1.9e-20	2.9e-18	down	6	SLC29A1	44219553	44234142	solute carrier famil...	no	no	no	no
ENSG00000112893	5936.38	-0.64	0.113	-5.682	1.3e-08	3.5e-07	down	5	MAN2A1	109689927	109869625	mannosidase alpha cl...	no	no	no	no
ENSG00000112964	187.056	-0.82	0.148	-5.521	3.4e-08	8e-07	down	5	GHR	42423439	42721878	growth hormone recep...	no	no	no	no
ENSG00000113070	479.602	1.301	0.319	4.085	4.4e-05	0.0005	up	5	HBEGF	140332843	140346603	heparin binding EGF ...	no	no	no	no
ENSG00000113273	3641.19	-0.636	0.184	-3.449	0.00056	0.005	down	5	ARSB	78777209	78986087	arylsulfatase B [Sou...	no	no	no	no
ENSG00000113296	93.839	2.883	0.403	7.159	8.1e-13	4.4e-11	up	5	THBS4	79991311	80083287	thrombospondin 4 [So...	no	no	no	no
ENSG00000113361	117.77	-2.1	0.223	-9.422	4.4e-21	7.7e-19	down	5	CDH6	31193686	31329146	cadherin 6 [Source:H...	no	no	no	no
ENSG00000113369	2331.81	1.048	0.29	3.61	0.00031	0.003	up	5	ARRDC3	91368631	91383317	arrestin domain cont...	no	no	no	no
ENSG00000113389	1875.81	1.266	0.235	5.381	7.4e-08	1.6e-06	up	5	NPR3	32689070	32791724	natriuretic peptide ...	no	no	no	no
ENSG00000113448	255.034	1.357	0.203	6.674	2.5e-11	1.1e-09	up	5	PDE4D	58969038	60522120	phosphodiesterase 4D...	no	no	no	no
ENSG00000114023	1102.52	0.937	0.154	6.092	1.1e-09	3.6e-08	up	3	FAM162A	122384161	122412334	family with sequence...	no	no	no	no
ENSG00000114115	80.046	5.136	0.402	12.771	2.4e-37	1.3e-34	up	3	RBP1	139517434	139539829	retinol binding prot...	no	no	no	no
ENSG00000114166	811.804	-0.947	0.112	-8.444	3.1e-17	3.1e-15	down	3	KAT2B	20040446	20154404	lysine acetyltransfe...	no	no	no	no
ENSG00000114251	13838.6	1.333	0.202	6.595	4.2e-11	1.8e-09	up	3	WNT5A	55465715	55490539	Wnt family member 5A...	no	no	no	no
ENSG00000114268	784.612	1.446	0.236	6.119	9.4e-10	3.1e-08	up	3	PFKFB4	48517684	48562015	6-phosphofructo-2-ki...	no	no	no	no
ENSG00000114270	9437.24	1.597	0.234	6.821	9e-12	4.2e-10	up	3	COL7A1	48564073	48595329	collagen type VII al...	no	no	no	no
ENSG00000114374	4537.18	1.216	0.073	16.563	1.3e-61	3.4e-58	up	Y	USP9Y	12537650	12860839	ubiquitin specific p...	no	no	no	no
ENSG00000114378	78.682	-2.737	0.339	-8.067	7.2e-16	5.8e-14	down	3	HYAL1	50299890	50312381	hyaluronidase 1 [Sou...	no	no	no	no
ENSG00000114541	35.155	-1.706	0.603	-2.828	0.005	0.026	down	3	FRMD4B	69168782	69542583	FERM domain containi...	no	no	no	no
ENSG00000114790	88.095	-1.921	0.234	-8.214	2.1e-16	1.9e-14	down	3	ARHGEF26	154121003	154257827	Rho guanine nucleoti...	no	no	no	no
ENSG00000114853	2855.89	-0.765	0.182	-4.192	2.8e-05	0.00033	down	3	ZBTB47	42653697	42667580	zinc finger and BTB ...	no	no	no	no
ENSG00000114948	673.555	0.621	0.214	2.903	0.004	0.022	up	2	ADAM23	206443532	206621127	ADAM metallopeptidas...	no	no	no	no
ENSG00000115041	474.721	1.182	0.288	4.11	3.9e-05	0.00045	up	2	KCNIP3	95297327	95386077	potassium voltage-ga...	no	no	no	no
ENSG00000115255	59.214	-0.703	0.237	-2.963	0.003	0.018	down	19	REEP6	1491166	1497927	receptor accessory p...	no	no	no	no
ENSG00000115266	168.619	-0.668	0.208	-3.21	0.001	0.009	down	19	APC2	1446302	1473244	APC regulator of WNT...	no	no	no	no
ENSG00000115267	268.328	1.93	0.335	5.752	8.8e-09	2.4e-07	up	2	IFIH1	162267074	162318684	interferon induced w...	no	no	no	no
ENSG00000115271	37.302	2.204	0.4	5.507	3.7e-08	8.6e-07	up	2	GCA	162318840	162371595	grancalcin [Source:H...	no	no	no	no
ENSG00000115339	60.196	2.189	0.391	5.602	2.1e-08	5.2e-07	up	2	GALNT3	165747588	165794659	polypeptide N-acetyl...	no	no	no	no
ENSG00000115380	7472.6	2.739	0.39	7.026	2.1e-12	1.1e-10	up	2	EFEMP1	55865967	55924139	EGF containing fibul...	no	no	no	no
ENSG00000115414	1.70909e+06	0.811	0.128	6.348	2.2e-10	8e-09	up	2	FN1	215360440	215436073	fibronectin 1 [Sourc...	no	no	no	no
ENSG00000115419	19878.3	-1.019	0.132	-7.724	1.1e-14	7.9e-13	down	2	GLS	190880821	190965552	glutaminase [Source:...	no	no	no	no
ENSG00000115457	847.622	2.318	0.607	3.818	0.00013	0.001	up	2	IGFBP2	216632828	216664436	insulin like growth ...	no	no	no	no
ENSG00000115461	8571.15	0.862	0.312	2.764	0.006	0.031	up	2	IGFBP5	216672105	216695549	insulin like growth ...	no	no	no	no
ENSG00000115468	93.782	1.573	0.519	3.033	0.002	0.015	up	2	EFHD1	232606057	232682776	EF-hand domain famil...	no	no	no	no
ENSG00000115548	2498.51	0.682	0.12	5.682	1.3e-08	3.5e-07	up	2	KDM3A	86440647	86492716	lysine demethylase 3...	no	no	no	no
ENSG00000115844	344.91	-0.994	0.36	-2.763	0.006	0.031	down	2	DLX2	172099438	172102900	distal-less homeobox...	no	no	no	no
ENSG00000115884	3317.41	-0.752	0.291	-2.583	0.01	0.047	down	2	SDC1	20200797	20225433	syndecan 1 [Source:H...	no	no	no	no
ENSG00000115902	2990.77	1.621	0.394	4.117	3.8e-05	0.00044	up	2	SLC1A4	64988477	65023865	solute carrier famil...	no	no	no	no
ENSG00000115963	10449.5	-0.603	0.136	-4.425	9.7e-06	0.00013	down	2	RND3	150468195	150539011	Rho family GTPase 3 ...	no	no	no	no
ENSG00000116016	9920.73	-0.876	0.194	-4.522	6.1e-06	8.8e-05	down	2	EPAS1	46293667	46386697	endothelial PAS doma...	no	no	no	no
ENSG00000116117	963.949	-1.108	0.249	-4.454	8.4e-06	0.00012	down	2	PARD3B	204545475	205620162	par-3 family cell po...	no	no	no	no
ENSG00000116132	15304.5	-0.669	0.161	-4.145	3.4e-05	0.00039	down	1	PRRX1	170662728	170739421	paired related homeo...	no	no	no	no
ENSG00000116285	2813.58	0.951	0.215	4.414	1e-05	0.00014	up	1	ERRFI1	8004404	8026309	ERBB receptor feedba...	no	no	no	no
ENSG00000116667	1224.76	-0.777	0.24	-3.233	0.001	0.009	down	1	C1orf21	184387029	184629019	chromosome 1 open re...	no	no	no	no
ENSG00000116833	40.016	1.281	0.486	2.635	0.008	0.042	up	1	NR5A2	200027614	200177420	nuclear receptor sub...	no	no	no	no
ENSG00000116852	104.743	3.507	0.475	7.384	1.5e-13	9.3e-12	up	1	KIF21B	200969390	201023714	kinesin family membe...	no	no	no	no
ENSG00000117069	352.309	1.732	0.292	5.924	3.1e-09	9.3e-08	up	1	ST6GALNAC5	76867480	77067546	ST6 N-acetylgalactos...	no	no	no	no
ENSG00000117115	32.118	-3.893	0.723	-5.381	7.4e-08	1.6e-06	down	1	PADI2	17066761	17119451	peptidyl arginine de...	no	no	no	no
ENSG00000117262	263.827	-0.648	0.16	-4.057	5e-05	0.00056	down	1	GPR89A	145607988	145670650	G protein-coupled re...	no	no	no	no
ENSG00000117266	90.887	3.352	0.412	8.13	4.3e-16	3.6e-14	up	1	CDK18	205504596	205532793	cyclin dependent kin...	no	no	no	no
ENSG00000117394	6635.49	1.224	0.196	6.23	4.7e-10	1.6e-08	up	1	SLC2A1	42925353	42958893	solute carrier famil...	no	no	no	no
ENSG00000117595	134.426	1.579	0.304	5.202	2e-07	4e-06	up	1	IRF6	209785617	209806175	interferon regulator...	no	no	no	no
ENSG00000117597	2120.75	-0.649	0.199	-3.258	0.001	0.008	down	1	UTP25	209827972	209857565	UTP25 small subunit ...	no	no	no	no
ENSG00000117748	958.32	-0.773	0.131	-5.888	3.9e-09	1.1e-07	down	1	RPA2	27891524	27914746	replication protein ...	no	no	no	no
ENSG00000117984	4890.89	-0.796	0.222	-3.581	0.00034	0.003	down	11	CTSD	1752752	1764573	cathepsin D [Source:...	no	no	no	no
ENSG00000118257	5080.35	-0.615	0.207	-2.979	0.003	0.018	down	2	NRP2	205681990	205798133	neuropilin 2 [Source...	no	no	no	no
ENSG00000118276	123.171	0.771	0.274	2.816	0.005	0.027	up	18	B4GALT6	31622246	31685836	beta-1,4-galactosylt...	no	no	no	no
ENSG00000118523	76114.2	1.504	0.099	15.118	1.2e-51	1.6e-48	up	6	CCN2	131948176	131951372	cellular communicati...	no	no	no	no
ENSG00000118526	93.488	7.176	0.8	8.964	3.1e-19	4.2e-17	up	6	TCF21	133889113	133895553	transcription factor...	no	no	no	no
ENSG00000118762	6489.16	-0.592	0.182	-3.246	0.001	0.008	down	4	PKD2	88007635	88077777	polycystin 2, transi...	no	no	no	no
ENSG00000118785	63.615	1.962	0.37	5.296	1.2e-07	2.5e-06	up	4	SPP1	87975667	87983532	secreted phosphoprot...	no	no	no	no
ENSG00000119227	225.828	-0.762	0.267	-2.849	0.004	0.025	down	3	PIGZ	196946356	196969060	phosphatidylinositol...	no	no	no	no
ENSG00000119280	8622.36	-0.868	0.259	-3.351	0.0008	0.006	down	1	C1orf198	230837119	230869589	chromosome 1 open re...	no	no	no	no
ENSG00000119514	69.005	-1.48	0.333	-4.446	8.8e-06	0.00012	down	9	GALNT12	98807670	98850081	polypeptide N-acetyl...	no	no	no	no
ENSG00000119699	402.251	-0.918	0.208	-4.416	1e-05	0.00014	down	14	TGFB3	75958097	75983011	transforming growth ...	no	no	no	no
ENSG00000119862	77.388	1.252	0.392	3.191	0.001	0.01	up	2	LGALSL	64453969	64461381	galectin like [Sourc...	no	no	no	no
ENSG00000119866	220.46	1.167	0.257	4.549	5.4e-06	7.9e-05	up	2	BCL11A	60450520	60554467	BAF chromatin remode...	no	no	no	no
ENSG00000119900	1092.26	-0.804	0.185	-4.339	1.4e-05	0.00018	down	6	OGFRL1	71288811	71309059	opioid growth factor...	no	no	no	no
ENSG00000119917	1024.6	1.027	0.31	3.312	0.00093	0.007	up	10	IFIT3	89327307	89377473	interferon induced p...	no	no	no	no
ENSG00000119922	316.674	0.816	0.305	2.673	0.008	0.038	up	10	IFIT2	89283694	89309271	interferon induced p...	no	no	no	no
ENSG00000119950	1260.79	0.87	0.248	3.506	0.00045	0.004	up	10	MXI1	110207605	110287365	MAX interactor 1, di...	no	no	no	no
ENSG00000120068	347.679	2.212	0.655	3.375	0.00074	0.006	up	17	HOXB8	48611377	48615292	homeobox B8 [Source:...	no	no	no	no
ENSG00000120318	695.03	0.786	0.137	5.728	1e-08	2.7e-07	up	5	ARAP3	141653401	141682230	ArfGAP with RhoGAP d...	no	no	no	no
ENSG00000120875	558.265	-1.218	0.25	-4.881	1.1e-06	1.8e-05	down	8	DUSP4	29333064	29350684	dual specificity pho...	no	no	no	no
ENSG00000120899	352.114	-0.969	0.239	-4.054	5e-05	0.00056	down	8	PTK2B	27311482	27459391	protein tyrosine kin...	no	no	no	no
ENSG00000121039	1539.06	-1.481	0.34	-4.359	1.3e-05	0.00017	down	8	RDH10	73294602	73325281	retinol dehydrogenas...	no	no	no	no
ENSG00000121064	2933.49	-0.679	0.222	-3.059	0.002	0.014	down	17	SCPEP1	56978129	57006768	serine carboxypeptid...	no	no	no	no
ENSG00000121281	2932.5	-0.937	0.135	-6.956	3.5e-12	1.7e-10	down	16	ADCY7	50246137	50318135	adenylate cyclase 7 ...	no	no	no	no
ENSG00000121361	102.339	-2.408	0.415	-5.805	6.4e-09	1.8e-07	down	12	KCNJ8	21764955	21775600	potassium inwardly r...	no	no	no	no
ENSG00000121413	416.555	0.601	0.211	2.849	0.004	0.025	up	19	ZSCAN18	58083838	58118427	zinc finger and SCAN...	no	no	no	no
ENSG00000121769	133.113	-1.029	0.262	-3.924	8.7e-05	0.00091	down	1	FABP3	31365253	31376850	fatty acid binding p...	no	no	no	no
ENSG00000121898	2376.24	0.668	0.24	2.783	0.005	0.029	up	10	CPXM2	123706207	123940267	carboxypeptidase X, ...	no	no	no	no
ENSG00000121904	3004.79	1.443	0.2	7.204	5.9e-13	3.2e-11	up	1	CSMD2	33513998	34165842	CUB and Sushi multip...	no	no	no	no
ENSG00000122367	280.836	3.085	0.668	4.617	3.9e-06	5.9e-05	up	10	LDB3	86666785	86736072	LIM domain binding 3...	no	no	no	no
ENSG00000122420	1526.35	0.852	0.294	2.899	0.004	0.022	up	1	PTGFR	78303884	78540701	prostaglandin F rece...	no	no	no	no
ENSG00000122644	793.837	-1.07	0.168	-6.369	1.9e-10	7.1e-09	down	7	ARL4A	12686856	12690958	ADP ribosylation fac...	no	no	no	no
ENSG00000122694	2643.26	0.619	0.133	4.658	3.2e-06	4.9e-05	up	9	GLIPR2	36136536	36163913	GLI pathogenesis rel...	no	no	no	no
ENSG00000122778	862.711	0.985	0.257	3.832	0.00013	0.001	up	7	KIAA1549	138831381	138981389	KIAA1549 [Source:HGN...	no	no	no	no
ENSG00000122786	123465	-0.617	0.228	-2.705	0.007	0.035	down	7	CALD1	134744252	134970729	caldesmon 1 [Source:...	no	no	no	no
ENSG00000122862	688.137	-1.432	0.347	-4.125	3.7e-05	0.00043	down	10	SRGN	69088103	69104805	serglycin [Source:HG...	no	no	no	no
ENSG00000122877	78.799	0.82	0.296	2.773	0.006	0.03	up	10	EGR2	62811996	62819167	early growth respons...	no	no	no	no
ENSG00000123146	3646.17	-0.772	0.179	-4.324	1.5e-05	0.0002	down	19	ADGRE5	14380501	14408725	adhesion G protein-c...	no	no	no	no
ENSG00000123191	454.631	0.8	0.17	4.699	2.6e-06	4.1e-05	up	13	ATP7B	51930436	52012125	ATPase copper transp...	no	no	no	no
ENSG00000123243	333.446	3.625	0.569	6.371	1.9e-10	7e-09	up	10	ITIH5	7559270	7666998	inter-alpha-trypsin ...	no	no	no	no
ENSG00000123388	39.147	6.027	2.004	3.008	0.003	0.016	up	12	HOXC11	53973126	53977643	homeobox C11 [Source...	no	no	no	no
ENSG00000123453	122.047	-1.667	0.38	-4.383	1.2e-05	0.00016	down	9	SARDH	133663560	133739955	sarcosine dehydrogen...	no	no	no	no
ENSG00000123500	110.155	-2.857	0.376	-7.593	3.1e-14	2.1e-12	down	6	COL10A1	116118909	116158747	collagen type X alph...	no	no	no	no
ENSG00000123572	58.002	23.499	2.503	9.39	6e-21	1e-18	up	X	NRK	105822539	105958610	Nik related kinase [...	no	no	no	yes
ENSG00000123689	138.622	6.79	0.58	11.709	1.1e-31	4.8e-29	up	1	G0S2	209675412	209676390	G0/G1 switch 2 [Sour...	no	no	no	no
ENSG00000123700	91.902	2.107	0.627	3.358	0.00079	0.006	up	17	KCNJ2	70168673	70180044	potassium inwardly r...	no	no	no	no
ENSG00000123836	475.739	-0.865	0.178	-4.869	1.1e-06	2e-05	down	1	PFKFB2	207034366	207081024	6-phosphofructo-2-ki...	no	no	no	no
ENSG00000124126	187.733	-0.743	0.207	-3.585	0.00034	0.003	down	20	PREX1	48624252	48827999	phosphatidylinositol...	no	no	no	no
ENSG00000124134	73.047	2.517	0.406	6.2	5.6e-10	1.9e-08	up	20	KCNS1	45091214	45101127	potassium voltage-ga...	no	no	no	no
ENSG00000124191	678.837	0.719	0.149	4.809	1.5e-06	2.5e-05	up	20	TOX2	43914852	44069616	TOX high mobility gr...	no	no	no	no
ENSG00000124243	416.855	0.629	0.098	6.397	1.6e-10	6e-09	up	20	BCAS4	50794894	50877177	breast carcinoma amp...	no	no	no	no
ENSG00000124343	1103.54	-1.959	0.444	-4.416	1e-05	0.00014	down	X	XG	2752040	2816500	Xg glycoprotein (Xg ...	no	yes	no	no
ENSG00000124749	67.639	1.862	0.448	4.154	3.3e-05	0.00038	up	6	COL21A1	56056590	56394094	collagen type XXI al...	no	no	no	no
ENSG00000124762	17864.1	-0.668	0.13	-5.133	2.8e-07	5.7e-06	down	6	CDKN1A	36676460	36687337	cyclin dependent kin...	no	no	no	no
ENSG00000124875	62.064	2.475	0.631	3.925	8.7e-05	0.00091	up	4	CXCL6	73836640	73849064	C-X-C motif chemokin...	no	no	no	no
ENSG00000124882	19.465	-2.512	0.978	-2.569	0.01	0.048	down	4	EREG	74365145	74388749	epiregulin [Source:H...	no	no	no	no
ENSG00000124920	88.079	0.841	0.319	2.637	0.008	0.042	up	11	MYRF	61752636	61788518	myelin regulatory fa...	no	no	no	no
ENSG00000125170	1442.44	-0.811	0.18	-4.503	6.7e-06	9.5e-05	down	16	DOK4	57471922	57487327	docking protein 4 [S...	no	no	no	no
ENSG00000125266	1565.48	0.867	0.239	3.623	0.00029	0.003	up	13	EFNB2	106489745	106535662	ephrin B2 [Source:HG...	no	no	no	no
ENSG00000125347	432.277	0.764	0.159	4.807	1.5e-06	2.6e-05	up	5	IRF1	132440440	132508719	interferon regulator...	no	no	no	no
ENSG00000125375	366.974	-0.64	0.217	-2.953	0.003	0.019	down	14	DMAC2L	50312324	50335558	distal membrane arm ...	no	no	no	no
ENSG00000125378	22.548	2.417	0.868	2.785	0.005	0.029	up	14	BMP4	53949736	53958761	bone morphogenetic p...	no	no	no	no
ENSG00000125384	223.722	0.678	0.198	3.417	0.00063	0.005	up	14	PTGER2	52314305	52328598	prostaglandin E rece...	no	no	no	no
ENSG00000125398	654.535	-2.037	0.479	-4.256	2.1e-05	0.00025	down	17	SOX9	72121020	72126416	SRY-box transcriptio...	no	no	no	no
ENSG00000125538	29.054	3.513	0.81	4.339	1.4e-05	0.00018	up	2	IL1B	112829751	112836816	interleukin 1 beta [...	no	no	no	no
ENSG00000125618	86.795	4.391	0.267	16.438	1e-60	2.2e-57	up	2	PAX8	113215997	113278921	paired box 8 [Source...	no	no	no	no
ENSG00000125657	179.982	-1.139	0.34	-3.35	0.00081	0.006	down	19	TNFSF9	6531026	6535924	TNF superfamily memb...	no	no	no	no
ENSG00000125730	63.504	2.563	0.648	3.959	7.5e-05	0.00081	up	19	C3	6677704	6730562	complement C3 [Sourc...	no	no	no	no
ENSG00000125848	40.77	-1.305	0.308	-4.236	2.3e-05	0.00027	down	20	FLRT3	14322985	14337614	fibronectin leucine ...	no	no	no	no
ENSG00000125965	113.176	2.198	0.298	7.389	1.5e-13	9e-12	up	20	GDF5	35433347	35454746	growth differentiati...	no	no	no	no
ENSG00000126368	836.212	0.595	0.205	2.904	0.004	0.022	up	17	NR1D1	40092793	40100589	nuclear receptor sub...	no	no	no	no
ENSG00000126467	20.475	-2.978	0.661	-4.505	6.6e-06	9.5e-05	down	19	TSKS	49739753	49763306	testis specific seri...	no	no	no	no
ENSG00000126603	1084.45	-0.637	0.223	-2.858	0.004	0.024	down	16	GLIS2	4314761	4339597	GLIS family zinc fin...	no	no	no	no
ENSG00000126709	2051.65	1.494	0.405	3.686	0.00023	0.002	up	1	IFI6	27666064	27672212	interferon alpha ind...	no	no	no	no
ENSG00000126778	734.772	1.046	0.191	5.464	4.6e-08	1.1e-06	up	14	SIX1	60643421	60658259	SIX homeobox 1 [Sour...	no	no	no	no
ENSG00000126785	395.198	1.217	0.251	4.855	1.2e-06	2.1e-05	up	14	RHOJ	63204114	63293508	ras homolog family m...	no	no	no	no
ENSG00000126821	904.5	-0.687	0.131	-5.243	1.6e-07	3.3e-06	down	14	SGPP1	63684216	63728065	sphingosine-1-phosph...	no	no	no	no
ENSG00000127220	254.894	0.629	0.238	2.639	0.008	0.041	up	19	ABHD8	17292131	17310236	abhydrolase domain c...	no	no	no	no
ENSG00000127415	857.926	-1.046	0.208	-5.036	4.8e-07	9e-06	down	4	IDUA	986997	1004564	alpha-L-iduronidase ...	no	no	no	no
ENSG00000127824	246.408	0.774	0.294	2.635	0.008	0.042	up	2	TUBA4A	219249710	219277902	tubulin alpha 4a [So...	no	no	no	no
ENSG00000127863	3505.25	1.56	0.19	8.201	2.4e-16	2.1e-14	up	13	TNFRSF19	23570370	23676104	TNF receptor superfa...	no	no	no	no
ENSG00000127955	1215.3	-0.885	0.167	-5.286	1.2e-07	2.6e-06	down	7	GNAI1	79768028	80226181	G protein subunit al...	no	no	no	no
ENSG00000128266	116.418	3.475	0.38	9.145	6e-20	8.6e-18	up	22	GNAZ	23070519	23125032	G protein subunit al...	no	no	no	no
ENSG00000128284	217.988	-0.697	0.251	-2.782	0.005	0.029	down	22	APOL3	36140329	36166177	apolipoprotein L3 [S...	no	no	no	no
ENSG00000128298	158.056	-2.072	0.238	-8.702	3.3e-18	3.8e-16	down	22	BAIAP2L2	38084652	38111015	BAR/IMD domain conta...	no	no	no	no
ENSG00000128342	240.693	3.771	0.42	8.982	2.7e-19	3.6e-17	up	22	LIF	30240453	30246759	LIF interleukin 6 fa...	no	no	no	no
ENSG00000128408	40.522	-0.724	0.28	-2.585	0.01	0.047	down	22	RIBC2	45413693	45432509	RIB43A domain with c...	no	no	no	no
ENSG00000128510	411.606	1.018	0.202	5.031	4.9e-07	9.2e-06	up	7	CPA4	130293134	130324180	carboxypeptidase A4 ...	no	no	no	no
ENSG00000128567	23167.5	-1.749	0.411	-4.253	2.1e-05	0.00026	down	7	PODXL	131500262	131558217	podocalyxin like [So...	no	no	no	no
ENSG00000128594	108.972	-2.206	0.389	-5.673	1.4e-08	3.6e-07	down	7	LRRC4	128027071	128032107	leucine rich repeat ...	no	no	no	no
ENSG00000128602	764.552	0.807	0.23	3.509	0.00045	0.004	up	7	SMO	129188633	129213545	smoothened, frizzled...	no	no	no	no
ENSG00000128606	150.684	2.018	0.239	8.461	2.7e-17	2.7e-15	up	7	LRRC17	102913000	102945111	leucine rich repeat ...	no	no	no	no
ENSG00000128656	2870.07	-0.788	0.243	-3.246	0.001	0.008	down	2	CHN1	174798809	175005381	chimerin 1 [Source:H...	no	no	no	no
ENSG00000128683	135.154	-1.589	0.386	-4.119	3.8e-05	0.00044	down	2	GAD1	170813213	170861151	glutamate decarboxyl...	no	no	no	no
ENSG00000128872	1297.8	-0.682	0.153	-4.469	7.9e-06	0.00011	down	15	TMOD2	51751597	51816363	tropomodulin 2 [Sour...	no	no	no	no
ENSG00000128918	27.985	3.816	1.137	3.356	0.00079	0.006	up	15	ALDH1A2	57953424	58497866	aldehyde dehydrogena...	no	no	no	no
ENSG00000128965	1211.64	0.858	0.326	2.628	0.009	0.042	up	15	CHAC1	40952962	40956512	ChaC glutathione spe...	no	no	no	no
ENSG00000129038	14715.8	0.635	0.148	4.285	1.8e-05	0.00023	up	15	LOXL1	73925989	73952137	lysyl oxidase like 1...	no	no	no	no
ENSG00000129173	181.453	-0.753	0.251	-3.001	0.003	0.017	down	11	E2F8	19224063	19241620	E2F transcription fa...	no	no	no	no
ENSG00000129235	1023.68	0.586	0.139	4.203	2.6e-05	0.00031	up	17	TXNDC17	6640985	6644541	thioredoxin domain c...	no	no	no	no
ENSG00000129295	83.473	-1.143	0.241	-4.748	2.1e-06	3.3e-05	down	8	DNAAF11	132570416	132675592	dynein axonemal asse...	no	no	no	no
ENSG00000129353	6824.09	-0.616	0.225	-2.738	0.006	0.032	down	19	SLC44A2	10602457	10644557	solute carrier famil...	no	no	no	no
ENSG00000129422	14.446	3.638	0.903	4.028	5.6e-05	0.00062	up	8	MTUS1	17643795	17801094	microtubule associat...	no	no	no	no
ENSG00000129467	230.641	1.169	0.303	3.859	0.00011	0.001	up	14	ADCY4	24318349	24335093	adenylate cyclase 4 ...	no	no	no	no
ENSG00000129682	199.383	4.176	1.623	2.573	0.01	0.048	up	X	FGF13	138614727	139222777	fibroblast growth fa...	no	no	yes	no
ENSG00000129757	66.953	1.445	0.464	3.118	0.002	0.012	up	11	CDKN1C	2883213	2885775	cyclin dependent kin...	no	no	no	no
ENSG00000129824	4580.62	1.033	0.147	7.018	2.3e-12	1.2e-10	up	Y	RPS4Y1	2841602	2932000	ribosomal protein S4...	no	no	no	no
ENSG00000129925	3134.01	-0.951	0.202	-4.705	2.5e-06	4e-05	down	16	PGAP6	370788	387113	post-GPI attachment ...	no	no	no	no
ENSG00000130032	32.509	5.844	1.477	3.957	7.6e-05	0.00081	up	X	PRRG3	151694607	151705924	proline rich and Gla...	no	no	no	no
ENSG00000130038	286.703	-0.975	0.179	-5.441	5.3e-08	1.2e-06	down	12	CRACR2A	3606633	3764819	calcium release acti...	no	no	no	no
ENSG00000130176	4903.24	1.351	0.419	3.226	0.001	0.009	up	19	CNN1	11538767	11550323	calponin 1 [Source:H...	no	no	no	no
ENSG00000130224	259.726	0.734	0.238	3.077	0.002	0.014	up	X	LRCH2	115110616	115234096	leucine rich repeats...	no	no	no	yes
ENSG00000130303	64.031	3.601	0.664	5.424	5.8e-08	1.3e-06	up	19	BST2	17402939	17405630	bone marrow stromal ...	no	no	no	no
ENSG00000130304	1430.43	-1.043	0.243	-4.301	1.7e-05	0.00021	down	19	SLC27A1	17468769	17506168	solute carrier famil...	no	no	no	no
ENSG00000130309	11280.4	-0.771	0.177	-4.359	1.3e-05	0.00017	down	19	COLGALT1	17555649	17583162	collagen beta(1-O)ga...	no	no	no	no
ENSG00000130413	53.389	1.987	0.336	5.911	3.4e-09	1e-07	up	11	STK33	8391868	8594289	serine/threonine kin...	no	no	no	no
ENSG00000130487	33.881	4.054	0.802	5.059	4.2e-07	8.1e-06	up	22	KLHDC7B	50545899	50551023	kelch domain contain...	no	no	no	no
ENSG00000130522	2901.99	0.627	0.179	3.504	0.00046	0.004	up	19	JUND	18279694	18281622	JunD proto-oncogene,...	no	no	no	no
ENSG00000130529	2376.19	-0.753	0.195	-3.868	0.00011	0.001	down	19	TRPM4	49157741	49211836	transient receptor p...	no	no	no	no
ENSG00000130558	308.059	-1.968	0.342	-5.747	9.1e-09	2.4e-07	down	9	OLFM1	135075422	135121180	olfactomedin 1 [Sour...	no	no	no	no
ENSG00000130589	1625.21	0.962	0.256	3.752	0.00018	0.002	up	20	HELZ2	63558086	63574239	helicase with zinc f...	no	no	no	no
ENSG00000130592	63.26	1.298	0.446	2.908	0.004	0.021	up	11	LSP1	1850904	1892267	lymphocyte specific ...	no	no	no	no
ENSG00000130649	93.747	-0.586	0.196	-2.992	0.003	0.017	down	10	CYP2E1	133520406	133561220	cytochrome P450 fami...	no	no	no	no
ENSG00000130702	107.036	2.312	0.258	8.975	2.8e-19	3.8e-17	up	20	LAMA5	62307955	62367312	laminin subunit alph...	no	no	no	no
ENSG00000130720	404.825	2.102	0.384	5.476	4.4e-08	1e-06	up	9	FIBCD1	130902438	130939286	fibrinogen C domain ...	no	no	no	no
ENSG00000130751	509.694	-2.616	0.327	-8.007	1.2e-15	9.1e-14	down	19	NPAS1	47019837	47045775	neuronal PAS domain ...	no	no	no	no
ENSG00000130762	69.191	1.355	0.415	3.263	0.001	0.008	up	1	ARHGEF16	3454665	3481113	Rho guanine nucleoti...	no	no	no	no
ENSG00000130881	1737.53	-0.796	0.184	-4.317	1.6e-05	0.0002	down	19	LRP3	33177603	33208864	LDL receptor related...	no	no	no	no
ENSG00000130956	1475.65	-0.941	0.162	-5.815	6.1e-09	1.7e-07	down	9	HABP4	96450169	96491336	hyaluronan binding p...	no	no	no	no
ENSG00000131002	2956.21	1.117	0.165	6.768	1.3e-11	5.9e-10	up	Y	TXLNGY	19567382	19604120	taxilin gamma pseudo...	no	no	no	no
ENSG00000131016	6539.27	0.671	0.253	2.656	0.008	0.04	up	6	AKAP12	151239967	151358559	A-kinase anchoring p...	no	no	no	no
ENSG00000131188	113.255	1.077	0.189	5.69	1.3e-08	3.3e-07	up	5	PRR7	177446445	177456286	proline rich 7, syna...	no	no	no	no
ENSG00000131378	4144.52	-0.73	0.104	-7.004	2.5e-12	1.3e-10	down	3	RFTN1	16313574	16514026	raftlin, lipid raft ...	no	no	no	no
ENSG00000131386	1117.14	3.215	0.192	16.753	5.4e-63	2.4e-59	up	3	GALNT15	16174680	16231992	polypeptide N-acetyl...	no	no	no	no
ENSG00000131669	322.529	0.627	0.158	3.972	7.1e-05	0.00077	up	9	NINJ1	93121496	93134251	ninjurin 1 [Source:H...	no	no	no	no
ENSG00000131797	171.479	1.486	0.18	8.241	1.7e-16	1.5e-14	up	16	CLUHP3	31703168	31708581	clustered mitochondr...	no	no	no	no
ENSG00000131941	74.081	0.934	0.251	3.728	0.00019	0.002	up	19	RHPN2	32978592	33064888	rhophilin Rho GTPase...	no	no	no	no
ENSG00000132000	478.176	-0.836	0.209	-3.992	6.6e-05	0.00071	down	19	PODNL1	13931187	13953392	podocan like 1 [Sour...	no	no	no	no
ENSG00000132003	314.152	1.111	0.244	4.56	5.1e-06	7.6e-05	up	19	ZSWIM4	13795443	13832254	zinc finger SWIM-typ...	no	no	no	no
ENSG00000132170	111.525	3.726	0.823	4.529	5.9e-06	8.6e-05	up	3	PPARG	12287368	12434356	peroxisome prolifera...	no	no	no	no
ENSG00000132205	5296.4	0.767	0.157	4.898	9.7e-07	1.7e-05	up	18	EMILIN2	2847006	2916003	elastin microfibril ...	no	no	no	no
ENSG00000132274	4683.99	-0.649	0.131	-4.956	7.2e-07	1.3e-05	down	11	TRIM22	5689610	5737089	tripartite motif con...	no	no	no	no
ENSG00000132321	41.701	4.534	0.782	5.796	6.8e-09	1.9e-07	up	2	IQCA1	236324147	236507535	IQ motif containing ...	no	no	no	no
ENSG00000132357	370.224	-1.659	0.262	-6.342	2.3e-10	8.3e-09	down	5	CARD6	40841308	40860175	caspase recruitment ...	no	no	no	no
ENSG00000132510	1600.5	0.766	0.227	3.377	0.00073	0.006	up	17	KDM6B	7834217	7854796	lysine demethylase 6...	no	no	no	no
ENSG00000132563	483.205	1.487	0.181	8.216	2.1e-16	1.9e-14	up	5	REEP2	138439057	138446969	receptor accessory p...	no	no	no	no
ENSG00000132639	34.124	2.032	0.52	3.907	9.3e-05	0.00097	up	20	SNAP25	10172395	10308258	synaptosome associat...	no	no	no	no
ENSG00000132688	2629.67	1.165	0.409	2.85	0.004	0.025	up	1	NES	156668763	156677407	nestin [Source:HGNC ...	no	no	no	no
ENSG00000132821	51.957	-1.906	0.279	-6.83	8.5e-12	4e-10	down	20	VSTM2L	37903111	37945350	V-set and transmembr...	no	no	no	no
ENSG00000132837	117.741	-0.849	0.202	-4.201	2.7e-05	0.00032	down	5	DMGDH	78997564	79236038	dimethylglycine dehy...	no	no	no	no
ENSG00000132840	552.486	-0.753	0.168	-4.477	7.6e-06	0.00011	down	5	BHMT2	79069767	79090069	betaine--homocystein...	no	no	no	no
ENSG00000132932	41.944	2.703	0.667	4.054	5e-05	0.00056	up	13	ATP8A2	25371974	26025851	ATPase phospholipid ...	no	no	no	no
ENSG00000132938	56.038	-1.424	0.44	-3.238	0.001	0.009	down	13	MTUS2	28820339	29505947	microtubule associat...	no	no	no	no
ENSG00000133019	55.794	3.046	0.647	4.708	2.5e-06	4e-05	up	1	CHRM3	239386565	239915452	cholinergic receptor...	no	no	no	no
ENSG00000133028	1480.93	-0.658	0.221	-2.97	0.003	0.018	down	17	SCO1	10672474	10698375	synthesis of cytochr...	no	no	no	no
ENSG00000133056	148.365	0.984	0.341	2.881	0.004	0.023	up	1	PIK3C2B	204422628	204494805	phosphatidylinositol...	no	no	no	no
ENSG00000133083	162.302	1.226	0.34	3.603	0.00031	0.003	up	13	DCLK1	35768652	36131382	doublecortin like ki...	no	no	no	no
ENSG00000133106	542.403	1.8	0.41	4.389	1.1e-05	0.00015	up	13	EPSTI1	42886388	42992271	epithelial stromal i...	no	no	no	no
ENSG00000133121	1254.9	0.642	0.091	7.042	1.9e-12	9.8e-11	up	13	STARD13	33103137	33350630	StAR related lipid t...	no	no	no	no
ENSG00000133142	4165.73	-0.584	0.194	-3.015	0.003	0.016	down	X	TCEAL4	103576231	103587729	transcription elonga...	no	no	no	yes
ENSG00000133169	83.025	1.811	0.407	4.453	8.5e-06	0.00012	up	X	BEX1	103062651	103064171	brain expressed X-li...	no	no	no	no
ENSG00000133216	722.565	1.986	0.193	10.272	9.4e-25	2.3e-22	up	1	EPHB2	22710839	22921500	EPH receptor B2 [Sou...	no	no	no	no
ENSG00000133433	304.507	1.302	0.191	6.825	8.8e-12	4.1e-10	up	22	GSTT2B	23957414	23961195	glutathione S-transf...	no	no	no	no
ENSG00000133466	1115.76	0.65	0.197	3.3	0.00097	0.007	up	22	C1QTNF6	37180166	37199385	C1q and TNF related ...	no	no	no	no
ENSG00000133519	21.653	5.906	1.894	3.117	0.002	0.012	up	22	ZDHHC8BP	23397938	23402157	ZDHHC8B, pseudogene ...	no	no	no	no
ENSG00000133687	211.078	1.539	0.341	4.51	6.5e-06	9.3e-05	up	12	TMTC1	29500840	29784759	transmembrane O-mann...	no	no	no	no
ENSG00000133805	450.857	0.7	0.164	4.281	1.9e-05	0.00023	up	11	AMPD3	10308313	10507579	adenosine monophosph...	no	no	no	no
ENSG00000133874	154.878	0.66	0.216	3.055	0.002	0.014	up	8	RNF122	33547754	33567128	ring finger protein ...	no	no	no	no
ENSG00000134198	435.247	1.727	0.202	8.554	1.2e-17	1.3e-15	up	1	TSPAN2	115048011	115089503	tetraspanin 2 [Sourc...	no	no	no	no
ENSG00000134242	50.998	-1.037	0.348	-2.982	0.003	0.018	down	1	PTPN22	113813811	113871753	protein tyrosine pho...	no	no	no	no
ENSG00000134245	262.317	0.739	0.258	2.868	0.004	0.024	up	1	WNT2B	112466541	112530165	Wnt family member 2B...	no	no	no	no
ENSG00000134247	2155.28	1.099	0.184	5.982	2.2e-09	6.7e-08	up	1	PTGFRN	116909916	116990353	prostaglandin F2 rec...	no	no	no	no
ENSG00000134253	160.177	0.773	0.174	4.447	8.7e-06	0.00012	up	1	TRIM45	117111060	117122587	tripartite motif con...	no	no	no	no
ENSG00000134259	939.954	0.852	0.107	7.977	1.5e-15	1.1e-13	up	1	NGF	115285904	115338770	nerve growth factor ...	no	no	no	no
ENSG00000134321	12.288	6.667	1.473	4.525	6e-06	8.7e-05	up	2	RSAD2	6865557	6898239	radical S-adenosyl m...	no	no	no	no
ENSG00000134326	57.637	3.848	1.207	3.187	0.001	0.01	up	2	CMPK2	6840570	6866635	cytidine/uridine mon...	no	no	no	no
ENSG00000134343	246.81	-3.022	0.579	-5.219	1.8e-07	3.7e-06	down	11	ANO3	26188842	26663289	anoctamin 3 [Source:...	no	no	no	no
ENSG00000134363	4201.92	-0.828	0.173	-4.79	1.7e-06	2.8e-05	down	5	FST	53480626	53487134	follistatin [Source:...	no	no	no	no
ENSG00000134463	119.602	4.356	0.396	11.002	3.7e-28	1.2e-25	up	10	ECHDC3	11742366	11764070	enoyl-CoA hydratase ...	no	no	no	no
ENSG00000134504	510.46	-0.629	0.121	-5.185	2.2e-07	4.4e-06	down	18	KCTD1	26454910	26657401	potassium channel te...	no	no	no	no
ENSG00000134508	700.155	-1.095	0.275	-3.978	7e-05	0.00075	down	18	CABLES1	23134564	23260470	Cdk5 and Abl enzyme ...	no	no	no	no
ENSG00000134516	746.458	0.708	0.158	4.489	7.1e-06	0.0001	up	5	DOCK2	169637268	170083382	dedicator of cytokin...	no	no	no	no
ENSG00000134531	20698.8	-0.758	0.167	-4.534	5.8e-06	8.4e-05	down	12	EMP1	13196723	13219941	epithelial membrane ...	no	no	no	no
ENSG00000134769	155.466	2.501	0.161	15.491	4e-54	7.5e-51	up	18	DTNA	34493291	34891844	dystrobrevin alpha [...	no	no	no	no
ENSG00000134775	1257.24	-1.09	0.229	-4.749	2e-06	3.3e-05	down	18	FHOD3	36297713	36780220	formin homology 2 do...	no	no	no	no
ENSG00000134817	36.721	-1.091	0.422	-2.586	0.01	0.047	down	11	APLNR	57233577	57237250	apelin receptor [Sou...	no	no	no	no
ENSG00000134830	34.838	-2.164	0.369	-5.867	4.4e-09	1.3e-07	down	19	C5AR2	47332175	47347329	complement C5a recep...	no	no	no	no
ENSG00000134986	4018.8	1.49	0.278	5.365	8.1e-08	1.8e-06	up	5	NREP	111662621	111997464	neuronal regeneratio...	no	no	no	no
ENSG00000135049	610.259	-0.676	0.184	-3.672	0.00024	0.002	down	9	AGTPBP1	85546539	85742029	ATP/GTP binding carb...	no	no	no	no
ENSG00000135074	8465.1	1.311	0.282	4.646	3.4e-06	5.2e-05	up	5	ADAM19	157395534	157575775	ADAM metallopeptidas...	no	no	no	no
ENSG00000135111	4914.72	1.691	0.516	3.279	0.001	0.008	up	12	TBX3	114670255	114684175	T-box transcription ...	no	no	no	no
ENSG00000135218	26.765	-3.674	0.426	-8.615	7e-18	7.6e-16	down	7	CD36	80369575	80679277	CD36 molecule [Sourc...	no	no	no	no
ENSG00000135269	3934.12	1.048	0.197	5.31	1.1e-07	2.3e-06	up	7	TES	116210506	116258783	testin LIM domain pr...	no	no	no	no
ENSG00000135299	111.82	-1.383	0.272	-5.09	3.6e-07	6.9e-06	down	6	ANKRD6	89433152	89633834	ankyrin repeat domai...	no	no	no	no
ENSG00000135312	46.884	4.172	1.244	3.354	0.0008	0.006	up	6	HTR1B	77460924	77463491	5-hydroxytryptamine ...	no	no	no	no
ENSG00000135318	12807.9	-0.674	0.111	-6.092	1.1e-09	3.6e-08	down	6	NT5E	85449584	85495791	5'-nucleotidase ecto...	no	no	no	no
ENSG00000135333	23.071	21.69	2.891	7.502	6.3e-14	4e-12	up	6	EPHA7	93240020	93419687	EPH receptor A7 [Sou...	no	no	no	no
ENSG00000135362	1097.63	0.809	0.222	3.641	0.00027	0.002	up	11	PRR5L	36296288	36465204	proline rich 5 like ...	no	no	no	no
ENSG00000135424	1403.41	1.177	0.355	3.314	0.00092	0.007	up	12	ITGA7	55684568	55716404	integrin subunit alp...	no	no	no	no
ENSG00000135454	555.01	-0.727	0.185	-3.931	8.4e-05	0.00089	down	12	B4GALNT1	57623409	57633239	beta-1,4-N-acetyl-ga...	no	no	no	no
ENSG00000135480	4438.26	1.507	0.418	3.605	0.00031	0.003	up	12	KRT7	52232520	52252186	keratin 7 [Source:HG...	no	no	no	no
ENSG00000135540	344.994	-0.944	0.178	-5.303	1.1e-07	2.4e-06	down	6	NHSL1	138422043	138692571	NHS like 1 [Source:H...	no	no	no	no
ENSG00000135547	25.302	3.542	1.248	2.837	0.005	0.025	up	6	HEY2	125747664	125761269	hes related family b...	no	no	no	no
ENSG00000135636	494.83	3.053	0.542	5.628	1.8e-08	4.6e-07	up	2	DYSF	71453561	71686763	dysferlin [Source:HG...	no	no	no	no
ENSG00000135678	358	0.928	0.303	3.059	0.002	0.014	up	12	CPM	68842197	68971570	carboxypeptidase M [...	no	no	no	no
ENSG00000135744	76.016	-4.051	0.398	-10.174	2.6e-24	6e-22	down	1	AGT	230690776	230745576	angiotensinogen [Sou...	no	no	no	no
ENSG00000135750	75.592	2.784	0.645	4.315	1.6e-05	0.0002	up	1	KCNK1	233614106	233672514	potassium two pore d...	no	no	no	no
ENSG00000135838	81.554	-0.955	0.171	-5.585	2.3e-08	5.7e-07	down	1	NPL	182789293	182830384	N-acetylneuraminate ...	no	no	no	no
ENSG00000135842	3506.42	0.707	0.195	3.617	0.0003	0.003	up	1	NIBAN1	184790724	184974508	niban apoptosis regu...	no	no	no	no
ENSG00000135929	427.846	0.988	0.202	4.902	9.5e-07	1.7e-05	up	2	CYP27A1	218781749	218815293	cytochrome P450 fami...	no	no	no	no
ENSG00000136114	249.407	-1.066	0.268	-3.981	6.9e-05	0.00074	down	13	THSD1	52377167	52416373	thrombospondin type ...	no	no	no	no
ENSG00000136153	31454.2	-0.794	0.167	-4.768	1.9e-06	3e-05	down	13	LMO7	75620434	75859870	LIM domain 7 [Source...	no	no	no	no
ENSG00000136160	25.519	4.071	1.223	3.33	0.00087	0.007	up	13	EDNRB	77895481	77975529	endothelin receptor ...	no	no	no	no
ENSG00000136231	1051.52	1.124	0.275	4.087	4.4e-05	0.00049	up	7	IGF2BP3	23310209	23470491	insulin like growth ...	no	no	no	no
ENSG00000136235	15672.3	-1.286	0.237	-5.429	5.7e-08	1.3e-06	down	7	GPNMB	23235967	23275108	glycoprotein nmb [So...	no	no	no	no
ENSG00000136378	2300.36	-0.899	0.329	-2.732	0.006	0.033	down	15	ADAMTS7	78759206	78811464	ADAM metallopeptidas...	no	no	no	no
ENSG00000136383	56.743	1.386	0.324	4.272	1.9e-05	0.00024	up	15	ALPK3	84817356	84873479	alpha kinase 3 [Sour...	no	no	no	no
ENSG00000136425	214.823	0.892	0.228	3.917	9e-05	0.00093	up	15	CIB2	78104606	78131535	calcium and integrin...	no	no	no	no
ENSG00000136478	2094.31	-0.801	0.195	-4.111	3.9e-05	0.00045	down	17	TEX2	64147227	64263260	testis expressed 2 [...	no	no	no	no
ENSG00000136490	778.208	0.645	0.124	5.196	2e-07	4.1e-06	up	17	LIMD2	63695888	63701172	LIM domain containin...	no	no	no	no
ENSG00000136542	12107.3	-0.847	0.132	-6.436	1.2e-10	4.8e-09	down	2	GALNT5	157257705	157318491	polypeptide N-acetyl...	no	no	no	no
ENSG00000136630	103.462	1.134	0.295	3.851	0.00012	0.001	up	1	HLX	220879431	220885059	H2.0 like homeobox [...	no	no	no	no
ENSG00000136720	2707.22	0.634	0.169	3.755	0.00017	0.002	up	2	HS6ST1	128236716	128318868	heparan sulfate 6-O-...	no	no	no	no
ENSG00000136848	2459.96	-0.767	0.215	-3.572	0.00035	0.003	down	9	DAB2IP	121567057	121785530	DAB2 interacting pro...	no	no	no	no
ENSG00000136856	120.638	-0.813	0.19	-4.28	1.9e-05	0.00023	down	9	SLC2A8	127397138	127408424	solute carrier famil...	no	no	no	no
ENSG00000136867	28.88	-1.979	0.428	-4.62	3.8e-06	5.8e-05	down	9	SLC31A2	113150976	113164140	solute carrier famil...	no	no	no	no
ENSG00000136960	9698.98	-1.206	0.305	-3.955	7.6e-05	0.00082	down	8	ENPP2	119557086	119673453	ectonucleotide pyrop...	no	no	no	no
ENSG00000136982	294.745	-0.64	0.189	-3.395	0.00069	0.005	down	8	DSCC1	119833976	119855894	DNA replication and ...	no	no	no	no
ENSG00000136999	313.507	-2.175	0.238	-9.145	6e-20	8.6e-18	down	8	CCN3	119416446	119424434	cellular communicati...	no	no	no	no
ENSG00000137193	1595.14	1.864	0.295	6.308	2.8e-10	1e-08	up	6	PIM1	37170152	37175428	Pim-1 proto-oncogene...	no	no	no	no
ENSG00000137203	121.335	3.4	0.793	4.286	1.8e-05	0.00023	up	6	TFAP2A	10393186	10419659	transcription factor...	no	no	no	no
ENSG00000137269	148.659	0.723	0.169	4.28	1.9e-05	0.00023	up	6	LRRC1	53794497	53924125	leucine rich repeat ...	no	no	no	no
ENSG00000137309	11259	1.003	0.226	4.437	9.1e-06	0.00012	up	6	HMGA1	34236873	34246231	high mobility group ...	no	no	no	no
ENSG00000137331	1076.65	2.462	0.246	10.027	1.2e-23	2.5e-21	up	6	IER3	30743199	30744548	immediate early resp...	no	no	no	no
ENSG00000137463	97.802	1.033	0.252	4.103	4.1e-05	0.00046	up	4	MGARP	139266165	139280225	mitochondria localiz...	no	no	no	no
ENSG00000137507	3660.86	-1.083	0.165	-6.566	5.2e-11	2.1e-09	down	11	LRRC32	76657524	76670747	leucine rich repeat ...	no	no	no	no
ENSG00000137573	28127.4	-0.837	0.171	-4.889	1e-06	1.8e-05	down	8	SULF1	69466624	69660915	sulfatase 1 [Source:...	no	no	no	no
ENSG00000137727	70.502	-1.777	0.222	-8.008	1.2e-15	9.1e-14	down	11	ARHGAP20	110577042	110713189	Rho GTPase activatin...	no	no	no	no
ENSG00000137752	193.644	1.562	0.601	2.6	0.009	0.045	up	11	CASP1	105025397	105035250	caspase 1 [Source:HG...	no	no	no	no
ENSG00000137857	79.596	1.639	0.326	5.028	5e-07	9.3e-06	up	15	DUOX1	45129933	45165576	dual oxidase 1 [Sour...	no	no	no	no
ENSG00000137868	39.925	2.407	0.579	4.156	3.2e-05	0.00038	up	15	STRA6	74179466	74212267	signaling receptor a...	no	no	no	no
ENSG00000137877	112.579	-1.471	0.33	-4.453	8.5e-06	0.00012	down	15	SPTBN5	41848146	41894053	spectrin beta, non-e...	no	no	no	no
ENSG00000137941	983.672	-1.691	0.212	-7.981	1.5e-15	1.1e-13	down	1	TTLL7	83865024	83999150	tubulin tyrosine lig...	no	no	no	no
ENSG00000137959	150.318	1.819	0.704	2.583	0.01	0.047	up	1	IFI44L	78619902	78646145	interferon induced p...	no	no	no	no
ENSG00000137960	66.17	-1.598	0.365	-4.381	1.2e-05	0.00016	down	1	GIPC2	77979542	78138444	GIPC PDZ domain cont...	no	no	no	no
ENSG00000138031	2084.85	-0.757	0.15	-5.045	4.5e-07	8.6e-06	down	2	ADCY3	24819169	24920237	adenylate cyclase 3 ...	no	no	no	no
ENSG00000138111	75.654	2.481	0.184	13.469	2.4e-41	1.8e-38	up	10	MFSD13A	102461395	102477045	major facilitator su...	no	no	no	no
ENSG00000138131	2343.49	-0.718	0.246	-2.918	0.004	0.021	down	10	LOXL4	98247690	98268194	lysyl oxidase like 4...	no	no	no	no
ENSG00000138135	455.622	1.745	0.611	2.854	0.004	0.024	up	10	CH25H	89205629	89207317	cholesterol 25-hydro...	no	no	no	no
ENSG00000138193	345.752	-1.087	0.146	-7.417	1.2e-13	7.4e-12	down	10	PLCE1	93993931	94332823	phospholipase C epsi...	no	no	no	no
ENSG00000138311	115.539	-0.687	0.24	-2.867	0.004	0.024	down	10	ZNF365	62374192	62480288	zinc finger protein ...	no	no	no	no
ENSG00000138336	339.281	0.851	0.25	3.407	0.00066	0.005	up	10	TET1	68560337	68694487	tet methylcytosine d...	no	no	no	no
ENSG00000138347	291.681	-1.089	0.266	-4.088	4.4e-05	0.00049	down	10	MYPN	68087897	68212017	myopalladin [Source:...	no	no	no	no
ENSG00000138411	1140.59	-0.958	0.169	-5.654	1.6e-08	4e-07	down	2	HECW2	196189099	196593684	HECT, C2 and WW doma...	no	no	no	no
ENSG00000138496	1467.85	0.783	0.215	3.641	0.00027	0.002	up	3	PARP9	122527924	122564577	poly(ADP-ribose) pol...	no	no	no	no
ENSG00000138606	82.161	1.011	0.277	3.653	0.00026	0.002	up	15	SHF	45167214	45201175	Src homology 2 domai...	no	no	no	no
ENSG00000138623	9574.37	-1.099	0.224	-4.895	9.8e-07	1.7e-05	down	15	SEMA7A	74409289	74433958	semaphorin 7A (John ...	no	no	no	no
ENSG00000138642	342.229	2.297	0.413	5.56	2.7e-08	6.5e-07	up	4	HERC6	88378739	88443097	HECT and RLD domain ...	no	no	no	no
ENSG00000138646	27.188	1.923	0.619	3.106	0.002	0.013	up	4	HERC5	88457119	88506163	HECT and RLD domain ...	no	no	no	no
ENSG00000138650	252.152	2.821	0.611	4.617	3.9e-06	5.9e-05	up	4	PCDH10	133149294	133208606	protocadherin 10 [So...	no	no	no	no
ENSG00000138669	37.198	2.893	0.912	3.173	0.002	0.01	up	4	PRKG2	81087370	81215222	protein kinase cGMP-...	no	no	no	no
ENSG00000138675	4095.93	-0.888	0.297	-2.99	0.003	0.017	down	4	FGF5	80266639	80336680	fibroblast growth fa...	no	no	no	no
ENSG00000138696	104.566	-0.653	0.256	-2.554	0.011	0.05	down	4	BMPR1B	94757955	95158448	bone morphogenetic p...	no	no	no	no
ENSG00000138735	1510.27	0.84	0.233	3.61	0.00031	0.003	up	4	PDE5A	119494397	119628804	phosphodiesterase 5A...	no	no	no	no
ENSG00000138744	944.316	-0.874	0.146	-6.004	1.9e-09	5.9e-08	down	4	NAAA	75913660	75941013	N-acylethanolamine a...	no	no	no	no
ENSG00000138756	1260.43	-0.758	0.217	-3.497	0.00047	0.004	down	4	BMP2K	78776342	78916365	BMP2 inducible kinas...	no	no	no	no
ENSG00000138759	2720.23	-0.912	0.264	-3.452	0.00056	0.004	down	4	FRAS1	78057323	78544269	Fraser extracellular...	no	no	no	no
ENSG00000138771	5072.99	0.954	0.214	4.464	8.1e-06	0.00011	up	4	SHROOM3	76435229	76783253	shroom family member...	no	no	no	no
ENSG00000138798	90.881	1.294	0.405	3.196	0.001	0.01	up	4	EGF	109912883	110013766	epidermal growth fac...	no	no	no	no
ENSG00000138821	105.887	-1.18	0.28	-4.211	2.5e-05	0.0003	down	4	SLC39A8	102251080	102431258	solute carrier famil...	no	no	no	no
ENSG00000138829	26203.3	1.177	0.298	3.946	7.9e-05	0.00085	up	5	FBN2	128257909	128659185	fibrillin 2 [Source:...	no	no	no	no
ENSG00000138944	560.504	-1.034	0.306	-3.38	0.00072	0.006	down	22	SHISAL1	44243665	44312951	shisa like 1 [Source...	no	no	no	no
ENSG00000139116	232.785	-0.821	0.192	-4.269	2e-05	0.00024	down	12	KIF21A	39293228	39443390	kinesin family membe...	no	no	no	no
ENSG00000139182	870.677	0.676	0.194	3.482	0.0005	0.004	up	12	CLSTN3	7129698	7158945	calsyntenin 3 [Sourc...	no	no	no	no
ENSG00000139194	83.731	0.59	0.23	2.566	0.01	0.049	up	12	RBP5	7115736	7128889	retinol binding prot...	no	no	no	no
ENSG00000139200	107.694	0.934	0.18	5.186	2.1e-07	4.4e-06	up	12	PIANP	6693791	6700815	PILR alpha associate...	no	no	no	no
ENSG00000139211	3517.5	0.922	0.201	4.579	4.7e-06	6.9e-05	up	12	AMIGO2	47075707	47079959	adhesion molecule wi...	no	no	no	no
ENSG00000139266	121.348	2.033	0.333	6.114	9.7e-10	3.2e-08	up	12	MARCHF9	57755103	57760411	membrane associated ...	no	no	no	no
ENSG00000139269	109.304	4.061	0.641	6.339	2.3e-10	8.5e-09	up	12	INHBE	57452323	57459280	inhibin subunit beta...	no	no	no	no
ENSG00000139292	143.469	-1.595	0.479	-3.329	0.00087	0.007	down	12	LGR5	71439798	71586310	leucine rich repeat ...	no	no	no	no
ENSG00000139304	97.237	-1.27	0.31	-4.098	4.2e-05	0.00047	down	12	PTPRQ	80402178	80680273	protein tyrosine pho...	no	no	no	no
ENSG00000139318	694.52	1.027	0.316	3.246	0.001	0.008	up	12	DUSP6	89347235	89352501	dual specificity pho...	no	no	no	no
ENSG00000139410	157.861	-0.942	0.229	-4.109	4e-05	0.00045	down	12	SDSL	113422380	113438276	serine dehydratase l...	no	no	no	no
ENSG00000139874	2150.53	-1.269	0.187	-6.777	1.2e-11	5.6e-10	down	14	SSTR1	38207904	38213067	somatostatin recepto...	no	no	no	no
ENSG00000139910	131.832	3.849	0.858	4.488	7.2e-06	0.0001	up	14	NOVA1	26443090	26598033	NOVA alternative spl...	no	no	no	no
ENSG00000139946	381.79	1.633	0.257	6.363	2e-10	7.3e-09	up	14	PELI2	56117814	56301524	pellino E3 ubiquitin...	no	no	no	no
ENSG00000139970	30.341	-3.145	0.7	-4.492	7.1e-06	0.0001	down	14	RTN1	59595976	59870776	reticulon 1 [Source:...	no	no	no	no
ENSG00000139973	29.013	4.821	0.967	4.987	6.1e-07	1.1e-05	up	14	SYT16	61811974	62112550	synaptotagmin 16 [So...	no	no	no	no
ENSG00000140092	17401.7	-0.825	0.247	-3.339	0.00084	0.006	down	14	FBLN5	91869411	91947987	fibulin 5 [Source:HG...	no	no	no	no
ENSG00000140199	2141.62	0.797	0.262	3.046	0.002	0.015	up	15	SLC12A6	34229784	34338060	solute carrier famil...	no	no	no	no
ENSG00000140280	177.325	-1.047	0.226	-4.633	3.6e-06	5.5e-05	down	15	LYSMD2	51723011	51751585	LysM domain containi...	no	no	no	no
ENSG00000140323	96.635	-1.539	0.2	-7.704	1.3e-14	9.1e-13	down	15	DISP2	40358219	40378621	dispatched RND trans...	no	no	no	no
ENSG00000140391	6542.3	-0.698	0.187	-3.735	0.00019	0.002	down	15	TSPAN3	77041404	77083984	tetraspanin 3 [Sourc...	no	no	no	no
ENSG00000140511	3109.03	-2.919	0.469	-6.224	4.9e-10	1.7e-08	down	15	HAPLN3	88877294	88895597	hyaluronan and prote...	no	no	no	no
ENSG00000140526	3324.89	-0.678	0.179	-3.788	0.00015	0.001	down	15	ABHD2	89087459	89202355	abhydrolase domain c...	no	no	no	no
ENSG00000140545	39111.5	-1.902	0.292	-6.511	7.5e-11	3e-09	down	15	MFGE8	88898683	88913468	milk fat globule EGF...	no	no	no	no
ENSG00000140557	633.172	-0.945	0.313	-3.022	0.003	0.016	down	15	ST8SIA2	92393881	92468728	ST8 alpha-N-acetyl-n...	no	no	no	no
ENSG00000140563	81.297	1.395	0.396	3.524	0.00043	0.004	up	15	MCTP2	94231538	94483952	multiple C2 and tran...	no	no	no	no
ENSG00000140961	200.925	-0.672	0.173	-3.881	0.0001	0.001	down	16	OSGIN1	83931311	83966332	oxidative stress ind...	no	no	no	no
ENSG00000141052	844.791	4.234	0.969	4.37	1.2e-05	0.00016	up	17	MYOCD	12665890	12768949	myocardin [Source:HG...	no	no	no	no
ENSG00000141198	302.812	1.238	0.206	6.016	1.8e-09	5.5e-08	up	17	TOM1L1	54899387	54961956	target of myb1 like ...	no	no	no	no
ENSG00000141682	411.249	1.106	0.24	4.608	4.1e-06	6.1e-05	up	18	PMAIP1	59899996	59904305	phorbol-12-myristate...	no	no	no	no
ENSG00000141753	40655.6	-1.34	0.253	-5.289	1.2e-07	2.6e-06	down	17	IGFBP4	40443450	40457725	insulin like growth ...	no	no	no	no
ENSG00000141934	90.003	2.404	0.196	12.269	1.3e-34	6.7e-32	up	19	PLPP2	281040	291403	phospholipid phospha...	no	no	no	no
ENSG00000142046	109.897	0.598	0.209	2.859	0.004	0.024	up	19	TMEM91	41350911	41384083	transmembrane protei...	no	no	no	no
ENSG00000142149	522.84	1.508	0.231	6.52	7e-11	2.8e-09	up	21	HUNK	31873020	32044633	hormonally up-regula...	no	no	no	no
ENSG00000142207	2284.23	-0.654	0.151	-4.326	1.5e-05	0.00019	down	21	URB1	32311018	32393012	URB1 ribosome biogen...	no	no	no	no
ENSG00000142235	48.403	2.256	0.251	8.999	2.3e-19	3.2e-17	up	19	LMTK3	48485271	48513935	lemur tyrosine kinas...	no	no	no	no
ENSG00000142303	1180.8	1.052	0.224	4.691	2.7e-06	4.3e-05	up	19	ADAMTS10	8580240	8610735	ADAM metallopeptidas...	no	no	no	no
ENSG00000142396	196.476	0.603	0.115	5.24	1.6e-07	3.3e-06	up	19	ERVK3-1	58305374	58316812	endogenous retroviru...	no	no	no	no
ENSG00000142408	21.783	6.766	2.377	2.847	0.004	0.025	up	19	CACNG8	53962937	53990215	calcium voltage-gate...	no	no	no	no
ENSG00000142611	54.84	3.171	0.587	5.398	6.7e-08	1.5e-06	up	1	PRDM16	3069168	3438621	PR/SET domain 16 [So...	no	no	no	no
ENSG00000142621	99.473	-1.785	0.305	-5.845	5.1e-09	1.4e-07	down	1	FHAD1	15236521	15400283	forkhead associated ...	no	no	no	no
ENSG00000142657	4459.57	-0.656	0.196	-3.347	0.00082	0.006	down	1	PGD	10398592	10420511	phosphogluconate deh...	no	no	no	no
ENSG00000142798	65375.4	-0.629	0.234	-2.692	0.007	0.036	down	1	HSPG2	21822244	21937310	heparan sulfate prot...	no	no	no	no
ENSG00000142910	547.247	-2.412	0.481	-5.013	5.3e-07	1e-05	down	1	TINAGL1	31576485	31587686	tubulointerstitial n...	no	no	no	no
ENSG00000143126	120.342	0.856	0.272	3.144	0.002	0.011	up	1	CELSR2	109249539	109275751	cadherin EGF LAG sev...	no	no	no	no
ENSG00000143127	573.203	1.068	0.252	4.241	2.2e-05	0.00027	up	1	ITGA10	145891208	145910111	integrin subunit alp...	no	no	no	no
ENSG00000143153	1933.6	-0.621	0.193	-3.216	0.001	0.009	down	1	ATP1B1	169105697	169310992	ATPase Na+/K+ transp...	no	no	no	no
ENSG00000143162	961.6	-0.759	0.206	-3.686	0.00023	0.002	down	1	CREG1	167529117	167553805	cellular repressor o...	no	no	no	no
ENSG00000143248	81.035	-0.626	0.198	-3.156	0.002	0.011	down	1	RGS5	163111121	163321791	regulator of G prote...	no	no	no	no
ENSG00000143320	5029.73	0.682	0.257	2.651	0.008	0.04	up	1	CRABP2	156699606	156705816	cellular retinoic ac...	no	no	no	no
ENSG00000143341	15798.1	0.634	0.218	2.914	0.004	0.021	up	1	HMCN1	185734391	186190949	hemicentin 1 [Source...	no	no	no	no
ENSG00000143387	15175.1	-1.361	0.262	-5.205	1.9e-07	4e-06	down	1	CTSK	150794880	150809577	cathepsin K [Source:...	no	no	no	no
ENSG00000143429	349.006	0.8	0.176	4.545	5.5e-06	8e-05	up	2	LSP1P4	91636684	91659961	LSP1 pseudogene 4 [S...	no	no	no	no
ENSG00000143476	666.324	-0.767	0.246	-3.115	0.002	0.012	down	1	DTL	212035553	212107400	denticleless E3 ubiq...	no	no	no	no
ENSG00000143507	1183.62	-0.891	0.114	-7.829	4.9e-15	3.6e-13	down	1	DUSP10	221701424	221742089	dual specificity pho...	no	no	no	no
ENSG00000143512	79.642	1.074	0.418	2.567	0.01	0.048	up	1	HHIPL2	222522258	222548104	HHIP like 2 [Source:...	no	no	no	no
ENSG00000143554	534.222	-0.807	0.167	-4.828	1.4e-06	2.3e-05	down	1	SLC27A3	153774354	153780157	solute carrier famil...	no	no	no	no
ENSG00000143702	4563.6	-0.804	0.197	-4.09	4.3e-05	0.00049	down	1	CEP170	243124428	243255348	centrosomal protein ...	no	no	no	no
ENSG00000143801	248.922	-0.854	0.233	-3.666	0.00025	0.002	down	1	PSEN2	226870184	226927726	presenilin 2 [Source...	no	no	no	no
ENSG00000143819	1420.11	-1.213	0.272	-4.455	8.4e-06	0.00012	down	1	EPHX1	225810124	225845563	epoxide hydrolase 1 ...	no	no	no	no
ENSG00000143845	63.989	1.573	0.409	3.843	0.00012	0.001	up	1	ETNK2	204131062	204152044	ethanolamine kinase ...	no	no	no	no
ENSG00000143847	1507.4	0.836	0.216	3.874	0.00011	0.001	up	1	PPFIA4	203026491	203078740	PTPRF interacting pr...	no	no	no	no
ENSG00000143850	194.156	3.54	0.548	6.456	1.1e-10	4.2e-09	up	1	PLEKHA6	204218853	204377665	pleckstrin homology ...	no	no	no	no
ENSG00000143867	558.385	-1.145	0.208	-5.519	3.4e-08	8.1e-07	down	2	OSR1	19351485	19358623	odd-skipped related ...	no	no	no	no
ENSG00000143878	8140.73	0.754	0.236	3.196	0.001	0.01	up	2	RHOB	20447074	20449440	ras homolog family m...	no	no	no	no
ENSG00000144057	282.827	5.548	0.978	5.675	1.4e-08	3.6e-07	up	2	ST6GAL2	106801600	106887108	ST6 beta-galactoside...	no	no	no	no
ENSG00000144063	406.795	1.14	0.336	3.394	0.00069	0.005	up	2	MALL	110083870	110116022	mal, T cell differen...	no	no	no	no
ENSG00000144199	98.164	1.04	0.264	3.943	8.1e-05	0.00086	up	2	FAHD2B	97083583	97094882	fumarylacetoacetate ...	no	no	no	no
ENSG00000144278	8.62	-5.044	1.736	-2.905	0.004	0.021	down	2	GALNT13	153871922	154453979	polypeptide N-acetyl...	no	no	no	no
ENSG00000144362	40.048	-0.865	0.279	-3.097	0.002	0.013	down	2	PHOSPHO2	169694454	169701708	phosphatase, orphan ...	no	no	no	no
ENSG00000144401	312.119	0.764	0.213	3.588	0.00033	0.003	up	2	METTL21A	207580631	207625928	methyltransferase 21...	no	no	no	no
ENSG00000144476	769.671	3.225	0.503	6.414	1.4e-10	5.5e-09	up	2	ACKR3	236567787	236582354	atypical chemokine r...	no	no	no	no
ENSG00000144596	41.057	-1.564	0.448	-3.488	0.00049	0.004	down	3	GRIP2	14489107	14556075	glutamate receptor i...	no	no	no	no
ENSG00000144655	921.494	0.764	0.201	3.794	0.00015	0.001	up	3	CSRNP1	39141855	39154562	cysteine and serine ...	no	no	no	no
ENSG00000144668	47.952	-1.578	0.274	-5.749	9e-09	2.4e-07	down	3	ITGA9	37452115	37823507	integrin subunit alp...	no	no	no	no
ENSG00000144677	1641.1	-0.652	0.15	-4.332	1.5e-05	0.00019	down	3	CTDSPL	37861880	37984469	CTD small phosphatas...	no	no	no	no
ENSG00000144681	592.202	-0.83	0.303	-2.744	0.006	0.032	down	3	STAC	36380503	36548007	SH3 and cysteine ric...	no	no	no	no
ENSG00000144712	106.285	0.637	0.247	2.578	0.01	0.047	up	3	CAND2	12796472	12834804	cullin associated an...	no	no	no	no
ENSG00000144730	203.131	0.807	0.305	2.642	0.008	0.041	up	3	IL17RD	57089982	57170306	interleukin 17 recep...	no	no	no	no
ENSG00000144746	5410.18	-0.602	0.097	-6.194	5.9e-10	2e-08	down	3	ARL6IP5	69084937	69106092	ADP ribosylation fac...	no	no	no	no
ENSG00000144802	988.961	0.964	0.165	5.824	5.7e-09	1.6e-07	up	3	NFKBIZ	101827991	101861022	NFKB inhibitor zeta ...	no	no	no	no
ENSG00000144959	1347.32	-1.031	0.2	-5.159	2.5e-07	5e-06	down	3	NCEH1	172630249	172711218	neutral cholesterol ...	no	no	no	no
ENSG00000145040	112.835	1.911	0.36	5.315	1.1e-07	2.3e-06	up	3	UCN2	48561718	48563781	urocortin 2 [Source:...	no	no	no	no
ENSG00000145242	70.509	6.042	2.016	2.996	0.003	0.017	up	4	EPHA5	65319563	65670495	EPH receptor A5 [Sou...	no	no	no	no
ENSG00000145244	691.231	-1.831	0.634	-2.889	0.004	0.022	down	4	CORIN	47593999	47838106	corin, serine peptid...	no	no	no	no
ENSG00000145247	246.034	1.147	0.118	9.734	2.2e-22	4.4e-20	up	4	OCIAD2	48885019	48906937	OCIA domain containi...	no	no	no	no
ENSG00000145423	4762.38	3.953	0.815	4.851	1.2e-06	2.1e-05	up	4	SFRP2	153780591	153789083	secreted frizzled re...	no	no	no	no
ENSG00000145476	996.172	-0.888	0.146	-6.075	1.2e-09	3.9e-08	down	4	CYP4V2	186191567	186213463	cytochrome P450 fami...	no	no	no	no
ENSG00000145506	15.464	7	1.651	4.24	2.2e-05	0.00027	up	5	NKD2	1008802	1038943	NKD inhibitor of WNT...	no	no	no	no
ENSG00000145536	34.983	4.745	1.353	3.508	0.00045	0.004	up	5	ADAMTS16	5140330	5320304	ADAM metallopeptidas...	no	no	no	no
ENSG00000145604	1535.33	-1.162	0.204	-5.681	1.3e-08	3.5e-07	down	5	SKP2	36151989	36196849	S-phase kinase assoc...	no	no	no	no
ENSG00000145623	7161.31	0.693	0.136	5.08	3.8e-07	7.3e-06	up	5	OSMR	38845858	38945596	oncostatin M recepto...	no	no	no	no
ENSG00000145632	3028.61	0.912	0.06	15.256	1.5e-52	2.2e-49	up	5	PLK2	58453982	58460139	polo like kinase 2 [...	no	no	no	no
ENSG00000145736	230.241	-0.94	0.199	-4.735	2.2e-06	3.5e-05	down	5	GTF2H2	71035016	71067689	general transcriptio...	no	no	no	no
ENSG00000145779	711.239	-1.193	0.263	-4.535	5.8e-06	8.4e-05	down	5	TNFAIP8	119268692	119399688	TNF alpha induced pr...	no	no	no	no
ENSG00000145824	116.27	3.155	0.49	6.442	1.2e-10	4.6e-09	up	5	CXCL14	135570679	135579279	C-X-C motif chemokin...	no	no	no	no
ENSG00000145861	87.658	-1.182	0.224	-5.285	1.3e-07	2.6e-06	down	5	C1QTNF2	160347754	160370641	C1q and TNF related ...	no	no	no	no
ENSG00000145901	4205.52	0.611	0.117	5.243	1.6e-07	3.3e-06	up	5	TNIP1	151029945	151093577	TNFAIP3 interacting ...	no	no	no	no
ENSG00000145934	12693.7	0.705	0.237	2.971	0.003	0.018	up	5	TENM2	166979029	168264157	teneurin transmembra...	no	no	no	no
ENSG00000145936	248.283	4.368	1.304	3.349	0.00081	0.006	up	5	KCNMB1	170374671	170389634	potassium calcium-ac...	no	no	no	no
ENSG00000145990	90.26	-0.807	0.294	-2.744	0.006	0.032	down	6	GFOD1	13357830	13487662	glucose-fructose oxi...	no	no	no	no
ENSG00000146054	68.208	-1.086	0.166	-6.541	6.1e-11	2.5e-09	down	5	TRIM7	181193924	181205293	tripartite motif con...	no	no	no	no
ENSG00000146263	638.314	-0.666	0.209	-3.181	0.001	0.01	down	6	MMS22L	97142161	97283217	MMS22 like, DNA repa...	no	no	no	no
ENSG00000146281	241.032	1.437	0.126	11.39	4.7e-30	1.7e-27	up	6	PM20D2	89146055	89165565	peptidase M20 domain...	no	no	no	no
ENSG00000146374	162.583	-0.942	0.343	-2.751	0.006	0.032	down	6	RSPO3	127118671	127199481	R-spondin 3 [Source:...	no	no	no	no
ENSG00000146376	1531.31	-1.418	0.2	-7.104	1.2e-12	6.5e-11	down	6	ARHGAP18	129576132	129710177	Rho GTPase activatin...	no	no	no	no
ENSG00000146411	45.367	1.049	0.342	3.07	0.002	0.014	up	6	SLC2A12	133987581	134052624	solute carrier famil...	no	no	no	no
ENSG00000146426	566.387	-0.652	0.22	-2.958	0.003	0.019	down	6	TIAM2	154832697	155257723	TIAM Rac1 associated...	no	no	no	no
ENSG00000146592	268.689	1.88	0.54	3.48	0.0005	0.004	up	7	CREB5	28299321	28825894	cAMP responsive elem...	no	no	no	no
ENSG00000146674	227053	0.833	0.251	3.32	0.0009	0.007	up	7	IGFBP3	45912245	45921874	insulin like growth ...	no	no	no	no
ENSG00000146966	154.862	2.698	0.478	5.642	1.7e-08	4.2e-07	up	7	DENND2A	140518420	140673993	DENN domain containi...	no	no	no	no
ENSG00000147027	7953.47	-0.96	0.169	-5.688	1.3e-08	3.4e-07	down	X	TMEM47	34627075	34657285	transmembrane protei...	no	no	no	no
ENSG00000147041	19.761	3.695	1.089	3.393	0.00069	0.005	up	X	SYTL5	38006553	38128819	synaptotagmin like 5...	no	no	no	yes
ENSG00000147166	55.524	2.07	0.367	5.637	1.7e-08	4.4e-07	up	X	ITGB1BP2	71301750	71305371	integrin subunit bet...	no	no	no	yes
ENSG00000147180	161.622	2.797	0.651	4.297	1.7e-05	0.00022	up	X	ZNF711	85243991	85273362	zinc finger protein ...	no	no	yes	no
ENSG00000147224	6317.15	-0.602	0.232	-2.593	0.01	0.046	down	X	PRPS1	107628428	107651993	phosphoribosyl pyrop...	no	no	no	yes
ENSG00000147231	118.59	-1.594	0.238	-6.709	2e-11	8.7e-10	down	X	RADX	106611930	106679439	RPA1 related single ...	no	no	no	yes
ENSG00000147234	95.664	-0.909	0.249	-3.644	0.00027	0.002	down	X	FRMPD3	107449652	107605255	FERM and PDZ domain ...	no	no	yes	no
ENSG00000147408	149.943	0.707	0.183	3.87	0.00011	0.001	up	8	CSGALNACT1	19404161	19758029	chondroitin sulfate ...	no	no	no	no
ENSG00000147573	324.868	6.454	1.083	5.962	2.5e-09	7.5e-08	up	8	TRIM55	66126896	66175485	tripartite motif con...	no	no	no	no
ENSG00000147852	736.69	0.973	0.229	4.252	2.1e-05	0.00026	up	9	VLDLR	2621182	2660056	very low density lip...	no	no	no	no
ENSG00000147874	1454.17	-0.611	0.175	-3.489	0.00048	0.004	down	9	HAUS6	19053141	19102904	HAUS augmin like com...	no	no	no	no
ENSG00000147883	1163.63	1.087	0.327	3.327	0.00088	0.007	up	9	CDKN2B	22002903	22009305	cyclin dependent kin...	no	no	no	no
ENSG00000147889	380.998	1.857	0.121	15.305	7.1e-53	1.2e-49	up	9	CDKN2A	21967752	21995301	cyclin dependent kin...	no	no	no	no
ENSG00000148053	567.042	2.852	0.797	3.578	0.00035	0.003	up	9	NTRK2	84668375	85095751	neurotrophic recepto...	no	no	no	no
ENSG00000148110	3176.59	-0.605	0.126	-4.809	1.5e-06	2.5e-05	down	9	MFSD14B	94374569	94461042	major facilitator su...	no	no	no	no
ENSG00000148344	631.746	-1.142	0.209	-5.475	4.4e-08	1e-06	down	9	PTGES	129738331	129753042	prostaglandin E synt...	no	no	no	no
ENSG00000148541	154.176	1.755	0.19	9.232	2.7e-20	4e-18	up	10	FAM13C	59246130	59363181	family with sequence...	no	no	no	no
ENSG00000148737	1630.21	-0.84	0.226	-3.718	0.0002	0.002	down	10	TCF7L2	112950247	113167678	transcription factor...	no	no	no	no
ENSG00000148842	421.52	0.63	0.167	3.782	0.00016	0.002	up	10	CNNM2	102918294	103090222	cyclin and CBS domai...	no	no	no	no
ENSG00000148848	14276.5	1.115	0.135	8.277	1.3e-16	1.1e-14	up	10	ADAM12	126012381	126388477	ADAM metallopeptidas...	no	no	no	no
ENSG00000148926	10632.8	-0.904	0.282	-3.209	0.001	0.009	down	11	ADM	10305073	10307397	adrenomedullin [Sour...	no	no	no	no
ENSG00000149084	1603.94	-0.794	0.092	-8.673	4.2e-18	4.8e-16	down	11	HSD17B12	43680680	43856617	hydroxysteroid 17-be...	no	no	no	no
ENSG00000149090	3142.1	0.933	0.274	3.4	0.00067	0.005	up	11	PAMR1	35431823	35530300	peptidase domain con...	no	no	no	no
ENSG00000149131	4227.9	1.297	0.284	4.574	4.8e-06	7.1e-05	up	11	SERPING1	57597387	57619171	serpin family G memb...	no	no	no	no
ENSG00000149201	190.53	2.392	0.513	4.666	3.1e-06	4.7e-05	up	11	CCDC81	86374736	86423109	coiled-coil domain c...	no	no	no	no
ENSG00000149218	2347.87	-0.72	0.114	-6.299	3e-10	1.1e-08	down	11	ENDOD1	95089846	95132645	endonuclease domain ...	no	no	no	no
ENSG00000149292	150.872	3.36	0.931	3.609	0.00031	0.003	up	11	TTC12	113314579	113383544	tetratricopeptide re...	no	no	no	no
ENSG00000149527	40.444	2.225	0.523	4.253	2.1e-05	0.00026	up	1	PLCH2	2425980	2505532	phospholipase C eta ...	no	no	no	no
ENSG00000149548	139.658	-0.857	0.259	-3.308	0.00094	0.007	down	11	CCDC15	124954121	125041489	coiled-coil domain c...	no	no	no	no
ENSG00000149599	39.011	6.505	1.336	4.871	1.1e-06	1.9e-05	up	20	DUSP15	31847637	31870664	dual specificity pho...	no	no	no	no
ENSG00000149633	281.248	1.734	0.352	4.925	8.4e-07	1.5e-05	up	20	KIAA1755	38210503	38260772	KIAA1755 [Source:HGN...	no	no	no	no
ENSG00000149948	1683.44	0.983	0.26	3.788	0.00015	0.001	up	12	HMGA2	65824460	65966291	high mobility group ...	no	no	no	no
ENSG00000149970	29.511	-1.614	0.519	-3.108	0.002	0.012	down	X	CNKSR2	21372801	21654695	connector enhancer o...	no	no	yes	no
ENSG00000150051	866.37	1.8	0.518	3.477	0.00051	0.004	up	10	MKX	27672874	27746060	mohawk homeobox [Sou...	no	no	no	no
ENSG00000150054	50.5	0.952	0.292	3.256	0.001	0.008	up	10	MPP7	28050993	28334486	MAGUK p55 scaffold p...	no	no	no	no
ENSG00000150281	413.404	0.609	0.15	4.068	4.8e-05	0.00053	up	16	CTF1	30896614	30903547	cardiotrophin 1 [Sou...	no	no	no	no
ENSG00000150394	420.273	2.195	0.846	2.595	0.009	0.046	up	16	CDH8	61647242	62037035	cadherin 8 [Source:H...	no	no	no	no
ENSG00000150540	451.662	-0.67	0.215	-3.119	0.002	0.012	down	2	HNMT	137964020	138016364	histamine N-methyltr...	no	no	no	no
ENSG00000150556	384.691	-2.191	0.255	-8.578	9.7e-18	1e-15	down	2	LYPD6B	149038107	149215262	LY6/PLAUR domain con...	no	no	no	no
ENSG00000150594	1327.21	-1.636	0.265	-6.168	6.9e-10	2.3e-08	down	10	ADRA2A	111077029	111080907	adrenoceptor alpha 2...	no	no	no	no
ENSG00000150627	54.086	1.477	0.313	4.725	2.3e-06	3.7e-05	up	4	WDR17	176065841	176182818	WD repeat domain 17 ...	no	no	no	no
ENSG00000150782	18.792	-2.624	0.759	-3.455	0.00055	0.004	down	11	IL18	112143253	112164096	interleukin 18 [Sour...	no	no	no	no
ENSG00000150907	143.322	-1.089	0.379	-2.87	0.004	0.023	down	13	FOXO1	40555667	40666641	forkhead box O1 [Sou...	no	no	no	no
ENSG00000151012	3407.88	0.696	0.254	2.742	0.006	0.032	up	4	SLC7A11	138164097	138242349	solute carrier famil...	no	no	no	no
ENSG00000151090	673.312	1.536	0.595	2.58	0.01	0.047	up	3	THRB	24117153	24495756	thyroid hormone rece...	no	no	no	no
ENSG00000151276	2819.96	-1.297	0.214	-6.071	1.3e-09	4e-08	down	3	MAGI1	65353525	66038918	membrane associated ...	no	no	no	no
ENSG00000151320	1186.3	2.796	0.213	13.151	1.7e-39	1e-36	up	14	AKAP6	32329298	32837684	A-kinase anchoring p...	no	no	no	no
ENSG00000151388	3245.11	-0.728	0.204	-3.578	0.00035	0.003	down	5	ADAMTS12	33523535	33892019	ADAM metallopeptidas...	no	no	no	no
ENSG00000151503	1424.95	-0.591	0.228	-2.594	0.009	0.046	down	11	NCAPD3	134150113	134225504	non-SMC condensin II...	no	no	no	no
ENSG00000151575	64.363	-0.895	0.197	-4.551	5.3e-06	7.8e-05	down	15	TEX9	56243971	56445997	testis expressed 9 [...	no	no	no	no
ENSG00000151623	61.356	-4.527	0.47	-9.637	5.6e-22	1.1e-19	down	4	NR3C2	148078762	148444698	nuclear receptor sub...	no	no	no	no
ENSG00000151692	127.201	2.052	0.607	3.379	0.00073	0.006	up	2	RNF144A	6917412	7068286	ring finger protein ...	no	no	no	no
ENSG00000151726	1396.03	-0.791	0.179	-4.422	9.8e-06	0.00013	down	4	ACSL1	184755595	184826818	acyl-CoA synthetase ...	no	no	no	no
ENSG00000151729	651.137	0.821	0.299	2.743	0.006	0.032	up	4	SLC25A4	185143266	185150382	solute carrier famil...	no	no	no	no
ENSG00000151892	1657.67	2.769	0.51	5.426	5.8e-08	1.3e-06	up	10	GFRA1	116056925	116276803	GDNF family receptor...	no	no	no	no
ENSG00000152049	3358.51	-1.115	0.423	-2.637	0.008	0.042	down	2	KCNE4	223052190	223198399	potassium voltage-ga...	no	no	no	no
ENSG00000152256	2068.55	0.995	0.16	6.232	4.6e-10	1.6e-08	up	2	PDK1	172555373	172608669	pyruvate dehydrogena...	no	no	no	no
ENSG00000152402	125.133	1.895	0.364	5.213	1.9e-07	3.8e-06	up	11	GUCY1A2	106674019	107018476	guanylate cyclase 1 ...	no	no	no	no
ENSG00000152495	140.995	-0.866	0.202	-4.282	1.9e-05	0.00023	down	5	CAMK4	111223653	111494886	calcium/calmodulin d...	no	no	no	no
ENSG00000152661	10640.7	0.958	0.244	3.928	8.6e-05	0.0009	up	6	GJA1	121435595	121449727	gap junction protein...	no	no	no	no
ENSG00000152689	86.325	-1.099	0.169	-6.492	8.4e-11	3.4e-09	down	2	RASGRP3	33436324	33564750	RAS guanyl releasing...	no	no	no	no
ENSG00000152952	15631.6	0.772	0.226	3.419	0.00063	0.005	up	3	PLOD2	146035139	146163725	procollagen-lysine,2...	no	no	no	no
ENSG00000153029	1513.51	-0.991	0.169	-5.856	4.7e-09	1.3e-07	down	1	MR1	181033374	181061938	major histocompatibi...	no	no	no	no
ENSG00000153064	64.239	-1.247	0.328	-3.805	0.00014	0.001	down	4	BANK1	101411286	102074812	B cell scaffold prot...	no	no	no	no
ENSG00000153132	309.806	3.333	0.759	4.391	1.1e-05	0.00015	up	4	CLGN	140388453	140427661	calmegin [Source:HGN...	no	no	no	no
ENSG00000153234	142.633	0.732	0.211	3.478	0.00051	0.004	up	2	NR4A2	156324437	156342348	nuclear receptor sub...	no	no	no	no
ENSG00000153404	228.039	1.478	0.309	4.787	1.7e-06	2.8e-05	up	5	PLEKHG4B	92168	189972	pleckstrin homology ...	no	no	no	no
ENSG00000153815	2646.23	0.675	0.249	2.716	0.007	0.034	up	16	CMIP	81444808	81711762	c-Maf inducing prote...	no	no	no	no
ENSG00000153904	9013.87	-1.021	0.131	-7.77	7.8e-15	5.5e-13	down	1	DDAH1	85318481	85578363	dimethylarginine dim...	no	no	no	no
ENSG00000153944	959.43	1.045	0.188	5.555	2.8e-08	6.7e-07	up	17	MSI2	57255851	57684689	musashi RNA binding ...	no	no	no	no
ENSG00000153956	1952.98	-0.671	0.142	-4.732	2.2e-06	3.6e-05	down	7	CACNA2D1	81946444	82443956	calcium voltage-gate...	no	no	no	no
ENSG00000153993	1067.34	-0.928	0.273	-3.398	0.00068	0.005	down	7	SEMA3D	84995553	85187056	semaphorin 3D [Sourc...	no	no	no	no
ENSG00000154065	184.434	-0.661	0.208	-3.184	0.001	0.01	down	18	ANKRD29	23598926	23662911	ankyrin repeat domai...	no	no	no	no
ENSG00000154096	30695.2	-0.637	0.137	-4.655	3.2e-06	5e-05	down	11	THY1	119415476	119424985	Thy-1 cell surface a...	no	no	no	no
ENSG00000154133	49.439	1.011	0.389	2.599	0.009	0.045	up	11	ROBO4	124883691	124898500	roundabout guidance ...	no	no	no	no
ENSG00000154175	2912.97	-1.477	0.208	-7.099	1.3e-12	6.7e-11	down	3	ABI3BP	100749156	100993515	ABI family member 3 ...	no	no	no	no
ENSG00000154188	1702.53	-1.31	0.18	-7.288	3.2e-13	1.8e-11	down	8	ANGPT1	107249482	107498055	angiopoietin 1 [Sour...	no	no	no	no
ENSG00000154217	482.65	-0.766	0.232	-3.3	0.00097	0.007	down	17	PITPNC1	67377281	67697256	phosphatidylinositol...	no	no	no	no
ENSG00000154277	5619.73	1.035	0.279	3.707	0.00021	0.002	up	4	UCHL1	41256413	41268455	ubiquitin C-terminal...	no	no	no	no
ENSG00000154358	253.817	0.917	0.195	4.711	2.5e-06	3.9e-05	up	1	OBSCN	228208044	228378876	obscurin, cytoskelet...	no	no	no	no
ENSG00000154529	295.054	25.77	2.778	9.277	1.7e-20	2.7e-18	up	9	CNTNAP3B	41890314	42129510	contactin associated...	no	no	no	no
ENSG00000154608	46.873	-1.114	0.229	-4.854	1.2e-06	2.1e-05	down	4	CEP170P1	118467590	118554100	centrosomal protein ...	no	no	no	no
ENSG00000154678	2056.01	-0.819	0.196	-4.179	2.9e-05	0.00034	down	7	PDE1C	31751179	32428131	phosphodiesterase 1C...	no	no	no	no
ENSG00000154721	366.315	1.01	0.35	2.89	0.004	0.022	up	21	JAM2	25639258	25717562	junctional adhesion ...	no	no	no	no
ENSG00000154734	11388	-0.782	0.173	-4.522	6.1e-06	8.8e-05	down	21	ADAMTS1	26835755	26845409	ADAM metallopeptidas...	no	no	no	no
ENSG00000154736	2457.1	-0.699	0.178	-3.918	8.9e-05	0.00093	down	21	ADAMTS5	26917922	26967088	ADAM metallopeptidas...	no	no	no	no
ENSG00000154760	72.395	-0.604	0.234	-2.587	0.01	0.047	down	17	SLFN13	35435096	35448837	schlafen family memb...	no	no	no	no
ENSG00000154803	1765.84	-0.986	0.253	-3.904	9.4e-05	0.00098	down	17	FLCN	17212212	17237188	folliculin [Source:H...	no	no	no	no
ENSG00000154856	491.327	2.815	0.33	8.518	1.6e-17	1.7e-15	up	18	APCDD1	10454635	10489949	APC down-regulated 1...	no	no	no	no
ENSG00000154874	303.398	-2.099	0.265	-7.913	2.5e-15	1.9e-13	down	17	CCDC144BP	18542155	18625447	coiled-coil domain c...	no	no	no	no
ENSG00000154930	351.414	-0.865	0.232	-3.724	0.0002	0.002	down	20	ACSS1	25006230	25058980	acyl-CoA synthetase ...	no	no	no	no
ENSG00000155011	480.552	1.823	0.599	3.045	0.002	0.015	up	4	DKK2	106921802	107283806	dickkopf WNT signali...	no	no	no	no
ENSG00000155016	852.252	-1.324	0.191	-6.944	3.8e-12	1.9e-10	down	4	CYP2U1	107931549	107953461	cytochrome P450 fami...	no	no	no	no
ENSG00000155324	2415.6	-1.292	0.147	-8.769	1.8e-18	2.2e-16	down	5	GRAMD2B	126360132	126496494	GRAM domain containi...	no	no	no	no
ENSG00000155363	2602.35	0.658	0.146	4.516	6.3e-06	9e-05	up	1	MOV10	112673141	112700756	Mov10 RISC complex R...	no	no	no	no
ENSG00000155657	354.972	0.725	0.204	3.563	0.00037	0.003	up	2	TTN	178525989	178830802	titin [Source:HGNC S...	no	no	no	no
ENSG00000155754	68.044	-0.982	0.19	-5.163	2.4e-07	4.9e-06	down	2	C2CD6	201487421	201619178	C2 calcium dependent...	no	no	no	no
ENSG00000155792	348.633	-2.594	0.306	-8.489	2.1e-17	2.2e-15	down	8	DEPTOR	119873717	120050918	DEP domain containin...	no	no	no	no
ENSG00000155846	45.03	-2.72	0.49	-5.548	2.9e-08	6.9e-07	down	5	PPARGC1B	149730298	149855022	PPARG coactivator 1 ...	no	no	no	no
ENSG00000155893	452.828	1.346	0.181	7.453	9.1e-14	5.7e-12	up	3	PXYLP1	141228726	141367753	2-phosphoxylose phos...	no	no	no	no
ENSG00000155962	61.947	1.798	0.537	3.351	0.00081	0.006	up	X	CLIC2	155276211	155334657	chloride intracellul...	no	no	no	yes
ENSG00000155980	130.85	0.857	0.172	4.992	6e-07	1.1e-05	up	12	KIF5A	57546026	57586633	kinesin family membe...	no	no	no	no
ENSG00000156011	4206.94	0.661	0.138	4.784	1.7e-06	2.8e-05	up	8	PSD3	18527303	19084730	pleckstrin and Sec7 ...	no	no	no	no
ENSG00000156103	2234.91	0.813	0.292	2.789	0.005	0.029	up	8	MMP16	88032011	88328025	matrix metallopeptid...	no	no	no	no
ENSG00000156136	1230.99	-0.74	0.214	-3.458	0.00054	0.004	down	4	DCK	70992538	71030914	deoxycytidine kinase...	no	no	no	no
ENSG00000156140	58.751	1.162	0.266	4.361	1.3e-05	0.00017	up	4	ADAMTS3	72280969	72569221	ADAM metallopeptidas...	no	no	no	no
ENSG00000156265	600.879	1.497	0.131	11.399	4.2e-30	1.5e-27	up	21	MAP3K7CL	29077471	29175889	MAP3K7 C-terminal li...	no	no	no	no
ENSG00000156273	2415.49	0.908	0.216	4.2	2.7e-05	0.00032	up	21	BACH1	29194071	29630751	BTB domain and CNC h...	no	no	no	no
ENSG00000156414	135.166	-3.769	0.444	-8.496	2e-17	2e-15	down	14	TDRD9	103928456	104052667	tudor domain contain...	no	no	no	no
ENSG00000156453	342.731	3.857	0.401	9.609	7.3e-22	1.4e-19	up	5	PCDH1	141853090	141879246	protocadherin 1 [Sou...	no	no	no	no
ENSG00000156463	83.052	1.19	0.245	4.857	1.2e-06	2.1e-05	up	5	SH3RF2	145936578	146081791	SH3 domain containin...	no	no	no	no
ENSG00000156466	1250.08	1.294	0.49	2.642	0.008	0.041	up	8	GDF6	96142333	96160806	growth differentiati...	no	no	no	no
ENSG00000156802	1985.22	-0.699	0.204	-3.428	0.00061	0.005	down	8	ATAD2	123319850	123416350	ATPase family AAA do...	no	no	no	no
ENSG00000156875	74.89	-0.691	0.241	-2.871	0.004	0.023	down	1	MFSD14A	100038095	100083377	major facilitator su...	no	no	no	no
ENSG00000157064	228.538	-0.999	0.182	-5.476	4.4e-08	1e-06	down	1	NMNAT2	183248237	183418380	nicotinamide nucleot...	no	no	no	no
ENSG00000157111	335.952	-1.023	0.18	-5.679	1.4e-08	3.5e-07	down	5	TMEM171	73120569	73131809	transmembrane protei...	no	no	no	no
ENSG00000157193	443.036	-0.785	0.206	-3.81	0.00014	0.001	down	1	LRP8	53242364	53328469	LDL receptor related...	no	no	no	no
ENSG00000157551	155.649	1.244	0.285	4.361	1.3e-05	0.00017	up	21	KCNJ15	38155549	38307357	potassium inwardly r...	no	no	no	no
ENSG00000157554	84.642	-3.2	0.304	-10.531	6.2e-26	1.7e-23	down	21	ERG	38380027	38661780	ETS transcription fa...	no	no	no	no
ENSG00000157601	996.297	2.245	0.517	4.339	1.4e-05	0.00019	up	21	MX1	41420020	41470071	MX dynamin like GTPa...	no	no	no	no
ENSG00000157680	712.633	0.77	0.22	3.493	0.00048	0.004	up	7	DGKI	137381037	137847092	diacylglycerol kinas...	no	no	no	no
ENSG00000157782	35.832	6.349	0.781	8.126	4.4e-16	3.7e-14	up	12	CABP1	120640626	120667324	calcium binding prot...	no	no	no	no
ENSG00000157833	401.348	2.156	0.598	3.608	0.00031	0.003	up	2	GAREM2	26173088	26189663	GRB2 associated regu...	no	no	no	no
ENSG00000157873	519.623	-0.959	0.2	-4.794	1.6e-06	2.7e-05	down	1	TNFRSF14	2555639	2565382	TNF receptor superfa...	no	no	no	no
ENSG00000158008	336.155	-0.947	0.317	-2.985	0.003	0.017	down	1	EXTL1	26019884	26036464	exostosin like glyco...	no	no	no	no
ENSG00000158050	177.849	1.466	0.369	3.969	7.2e-05	0.00078	up	2	DUSP2	96143169	96145440	dual specificity pho...	no	no	no	no
ENSG00000158089	40.403	3.289	0.501	6.56	5.4e-11	2.2e-09	up	2	GALNT14	30910467	31155202	polypeptide N-acetyl...	no	no	no	no
ENSG00000158122	904.001	-0.814	0.226	-3.596	0.00032	0.003	down	9	PRXL2C	96639577	96655317	peroxiredoxin like 2...	no	no	no	no
ENSG00000158201	179.677	-0.686	0.15	-4.564	5e-06	7.4e-05	down	18	ABHD3	21650901	21704780	abhydrolase domain c...	no	no	no	no
ENSG00000158270	2973.51	1.298	0.265	4.888	1e-06	1.8e-05	up	18	COLEC12	316737	500722	collectin subfamily ...	no	no	no	no
ENSG00000158296	107.443	-0.966	0.27	-3.575	0.00035	0.003	down	20	SLC13A3	46557823	46684467	solute carrier famil...	no	no	no	no
ENSG00000158445	16.421	-1.683	0.604	-2.788	0.005	0.029	down	20	KCNB1	49293394	49484297	potassium voltage-ga...	no	no	no	no
ENSG00000158555	858.151	-0.629	0.182	-3.468	0.00053	0.004	down	11	GDPD5	75434640	75525941	glycerophosphodieste...	no	no	no	no
ENSG00000158560	81.772	-2.166	0.393	-5.508	3.6e-08	8.5e-07	down	7	DYNC1I1	95772506	96110322	dynein cytoplasmic 1...	no	no	no	no
ENSG00000159023	430.678	1.505	0.174	8.675	4.1e-18	4.7e-16	up	1	EPB41	28887091	29120046	erythrocyte membrane...	no	no	no	no
ENSG00000159082	910.893	-0.607	0.133	-4.552	5.3e-06	7.8e-05	down	21	SYNJ1	32628759	32728040	synaptojanin 1 [Sour...	no	no	no	no
ENSG00000159167	1354.08	1.776	0.351	5.058	4.2e-07	8.1e-06	up	8	STC1	23841929	23854806	stanniocalcin 1 [Sou...	no	no	no	no
ENSG00000159217	1537.06	1.391	0.244	5.689	1.3e-08	3.3e-07	up	17	IGF2BP1	48997385	49056145	insulin like growth ...	no	no	no	no
ENSG00000159251	20545.5	-2.551	0.504	-5.064	4.1e-07	7.9e-06	down	15	ACTC1	34790230	34795549	actin alpha cardiac ...	no	no	no	no
ENSG00000159263	312.315	10.923	1.667	6.555	5.6e-11	2.3e-09	up	21	SIM2	36699115	36749917	SIM bHLH transcripti...	no	no	no	no
ENSG00000159348	1391.15	-0.76	0.163	-4.667	3.1e-06	4.7e-05	down	1	CYB5R1	202961873	202967275	cytochrome b5 reduct...	no	no	no	no
ENSG00000159363	1446.8	-0.625	0.171	-3.653	0.00026	0.002	down	1	ATP13A2	16985958	17011928	ATPase cation transp...	no	no	no	no
ENSG00000159674	2476.05	1.422	0.28	5.084	3.7e-07	7.2e-06	up	4	SPON2	1166932	1208962	spondin 2 [Source:HG...	no	no	no	no
ENSG00000159884	292.497	-0.986	0.247	-3.989	6.6e-05	0.00072	down	9	CCDC107	35658290	35661511	coiled-coil domain c...	no	no	no	no
ENSG00000160097	62.954	0.862	0.236	3.654	0.00026	0.002	up	1	FNDC5	32862268	32872482	fibronectin type III...	no	no	no	no
ENSG00000160161	28.72	-1.863	0.388	-4.807	1.5e-06	2.6e-05	down	19	CILP2	19538248	19546659	cartilage intermedia...	no	no	no	no
ENSG00000160200	403.522	0.859	0.255	3.364	0.00077	0.006	up	21	CBS	43053191	43076943	cystathionine beta-s...	no	no	no	no
ENSG00000160201	167.607	-1.1	0.284	-3.871	0.00011	0.001	down	21	U2AF1	43092956	43107570	U2 small nuclear RNA...	no	no	no	no
ENSG00000160219	48.071	-1.102	0.213	-5.186	2.1e-07	4.4e-06	down	X	GAB3	154675249	154751583	GRB2 associated bind...	no	no	no	yes
ENSG00000160221	157.81	1.72	0.247	6.958	3.5e-12	1.7e-10	up	21	GATD3	44133610	44210114	glutamine amidotrans...	no	no	no	no
ENSG00000160255	312.588	-2.909	0.314	-9.261	2e-20	3.1e-18	down	21	ITGB2	44885953	44931989	integrin subunit bet...	no	no	no	no
ENSG00000160326	469.745	-0.666	0.221	-3.013	0.003	0.016	down	9	SLC2A6	133471094	133479127	solute carrier famil...	no	no	no	no
ENSG00000160469	375.203	1.382	0.162	8.526	1.5e-17	1.6e-15	up	19	BRSK1	55282072	55312562	BR serine/threonine ...	no	no	no	no
ENSG00000160613	2477.76	-0.672	0.195	-3.448	0.00056	0.005	down	11	PCSK7	117204337	117232525	proprotein convertas...	no	no	no	no
ENSG00000160712	320.828	-0.761	0.266	-2.865	0.004	0.024	down	1	IL6R	154405193	154469450	interleukin 6 recept...	no	no	no	no
ENSG00000160886	262.186	2.145	0.283	7.567	3.8e-14	2.5e-12	up	8	LY6K	142700111	142705127	lymphocyte antigen 6...	no	no	no	no
ENSG00000161249	186.945	2.531	0.303	8.351	6.8e-17	6.5e-15	up	19	DMKN	35497220	35513658	dermokine [Source:HG...	no	no	no	no
ENSG00000161281	408.883	-1.312	0.275	-4.776	1.8e-06	2.9e-05	down	19	COX7A1	36150922	36152449	cytochrome c oxidase...	no	no	no	no
ENSG00000161921	54.899	-0.847	0.322	-2.631	0.009	0.042	down	17	CXCL16	4733533	4739928	C-X-C motif chemokin...	no	no	no	no
ENSG00000162066	644.155	-1.302	0.256	-5.091	3.6e-07	6.9e-06	down	16	AMDHD2	2520357	2531422	amidohydrolase domai...	no	no	no	no
ENSG00000162073	284.282	-0.777	0.247	-3.146	0.002	0.011	down	16	PAQR4	2969270	2973484	progestin and adipoQ...	no	no	no	no
ENSG00000162105	43.324	-1.24	0.369	-3.36	0.00078	0.006	down	11	SHANK2	70467854	71252577	SH3 and multiple ank...	no	no	no	no
ENSG00000162144	1136.08	-0.606	0.136	-4.456	8.3e-06	0.00012	down	11	CYB561A3	61348754	61362283	cytochrome b561 fami...	no	no	no	no
ENSG00000162383	286.698	-2.649	0.3	-8.817	1.2e-18	1.5e-16	down	1	SLC1A7	53087179	53142638	solute carrier famil...	no	no	no	no
ENSG00000162390	211.891	-1.03	0.221	-4.658	3.2e-06	4.9e-05	down	1	ACOT11	54542257	54639192	acyl-CoA thioesteras...	no	no	no	no
ENSG00000162413	2688.2	-0.641	0.198	-3.236	0.001	0.009	down	1	KLHL21	6590724	6614607	kelch like family me...	no	no	no	no
ENSG00000162433	2560.26	1.07	0.291	3.677	0.00024	0.002	up	1	AK4	65147549	65232145	adenylate kinase 4 [...	no	no	no	no
ENSG00000162545	1995.78	1.113	0.379	2.932	0.003	0.02	up	1	CAMK2N1	20482391	20486210	calcium/calmodulin d...	no	no	no	no
ENSG00000162551	190.457	5.499	1.156	4.758	2e-06	3.2e-05	up	1	ALPL	21509397	21578410	alkaline phosphatase...	no	no	no	no
ENSG00000162552	37.556	-1.781	0.288	-6.19	6e-10	2e-08	down	1	WNT4	22117313	22143969	Wnt family member 4 ...	no	no	no	no
ENSG00000162595	156.413	2.516	0.687	3.664	0.00025	0.002	up	1	DIRAS3	68045886	68051717	DIRAS family GTPase ...	no	no	no	no
ENSG00000162616	3238.46	-0.592	0.191	-3.102	0.002	0.013	down	1	DNAJB4	77979175	78017964	DnaJ heat shock prot...	no	no	no	no
ENSG00000162618	840.358	-1.398	0.146	-9.553	1.3e-21	2.3e-19	down	1	ADGRL4	78889764	79282124	adhesion G protein-c...	no	no	no	no
ENSG00000162624	36.956	-5.935	1.349	-4.4	1.1e-05	0.00015	down	1	LHX8	75128434	75161533	LIM homeobox 8 [Sour...	no	no	no	no
ENSG00000162631	1281.89	-0.853	0.225	-3.785	0.00015	0.002	down	1	NTNG1	107140007	107484923	netrin G1 [Source:HG...	no	no	no	no
ENSG00000162643	83.681	-0.671	0.203	-3.308	0.00094	0.007	down	1	DNAI3	84999147	85133138	dynein axonemal inte...	no	no	no	no
ENSG00000162654	43.49	3.149	0.569	5.537	3.1e-08	7.4e-07	up	1	GBP4	89181144	89198942	guanylate binding pr...	no	no	no	no
ENSG00000162687	63.806	2.047	0.325	6.293	3.1e-10	1.1e-08	up	1	KCNT2	196225779	196609225	potassium sodium-act...	no	no	no	no
ENSG00000162692	85.42	4.47	0.941	4.751	2e-06	3.3e-05	up	1	VCAM1	100719742	100739045	vascular cell adhesi...	no	no	no	no
ENSG00000162722	28.991	5.772	1.233	4.683	2.8e-06	4.4e-05	up	1	TRIM58	247857187	247880138	tripartite motif con...	no	no	no	no
ENSG00000162738	134.024	4.644	0.94	4.942	7.7e-07	1.4e-05	up	1	VANGL2	160400564	160428670	VANGL planar cell po...	no	no	no	no
ENSG00000162772	312.804	2.466	0.347	7.11	1.2e-12	6.2e-11	up	1	ATF3	212565334	212620777	activating transcrip...	no	no	no	no
ENSG00000162849	1289.69	1.503	0.312	4.815	1.5e-06	2.5e-05	up	1	KIF26B	245154985	245709432	kinesin family membe...	no	no	no	no
ENSG00000162894	74.825	1.218	0.349	3.489	0.00049	0.004	up	1	FCMR	206903317	206923247	Fc mu receptor [Sour...	no	no	no	no
ENSG00000162976	1029.62	-0.585	0.139	-4.214	2.5e-05	0.0003	down	2	SLC66A3	11155198	11178870	solute carrier famil...	no	no	no	no
ENSG00000162994	325.996	0.592	0.216	2.736	0.006	0.033	up	2	CLHC1	55172547	55232563	clathrin heavy chain...	no	no	no	no
ENSG00000163013	120.255	1.519	0.256	5.928	3.1e-09	9.1e-08	up	2	FBXO41	73254682	73284478	F-box protein 41 [So...	no	no	no	no
ENSG00000163017	3817.97	9.406	1.691	5.563	2.7e-08	6.4e-07	up	2	ACTG2	73892314	73919865	actin gamma 2, smoot...	no	no	no	no
ENSG00000163032	68.549	2.819	0.718	3.928	8.6e-05	0.0009	up	2	VSNL1	17539126	17657018	visinin like 1 [Sour...	no	no	no	no
ENSG00000163083	312.564	2.88	0.623	4.627	3.7e-06	5.7e-05	up	2	INHBB	120346136	120351803	inhibin subunit beta...	no	no	no	no
ENSG00000163131	87.926	-0.997	0.302	-3.306	0.00095	0.007	down	1	CTSS	150730079	150765957	cathepsin S [Source:...	no	no	no	no
ENSG00000163171	19267.7	0.652	0.138	4.734	2.2e-06	3.6e-05	up	2	CDC42EP3	37641882	37738468	CDC42 effector prote...	no	no	no	no
ENSG00000163251	68.355	-1.829	0.249	-7.332	2.3e-13	1.3e-11	down	2	FZD5	207762598	207769906	frizzled class recep...	no	no	no	no
ENSG00000163359	355426	0.727	0.132	5.525	3.3e-08	7.8e-07	up	2	COL6A3	237324003	237414328	collagen type VI alp...	no	no	no	no
ENSG00000163393	483.748	-0.935	0.223	-4.187	2.8e-05	0.00033	down	1	SLC22A15	115976513	116070054	solute carrier famil...	no	no	no	no
ENSG00000163520	25596.9	-0.765	0.241	-3.177	0.001	0.01	down	3	FBLN2	13549125	13638422	fibulin 2 [Source:HG...	no	no	no	no
ENSG00000163545	347.487	0.609	0.196	3.111	0.002	0.012	up	1	NUAK2	205302063	205321745	NUAK family kinase 2...	no	no	no	no
ENSG00000163584	1897.82	0.607	0.155	3.917	9e-05	0.00094	up	3	RPL22L1	170864875	170870208	ribosomal protein L2...	no	no	no	no
ENSG00000163618	379.992	-2.773	0.318	-8.709	3.1e-18	3.6e-16	down	3	CADPS	62398346	62875416	calcium dependent se...	no	no	no	no
ENSG00000163638	146.9	-0.619	0.24	-2.573	0.01	0.048	down	3	ADAMTS9	64515654	64688000	ADAM metallopeptidas...	no	no	no	no
ENSG00000163687	26.37	-25.43	3.249	-7.826	5e-15	3.6e-13	down	3	DNASE1L3	58192257	58214697	deoxyribonuclease 1 ...	no	no	no	no
ENSG00000163694	80.338	-1.429	0.359	-3.983	6.8e-05	0.00074	down	4	RBM47	40423267	40630875	RNA binding motif pr...	no	no	no	no
ENSG00000163701	344.678	-1.155	0.235	-4.912	9e-07	1.6e-05	down	3	IL17RE	9902612	9916402	interleukin 17 recep...	no	no	no	no
ENSG00000163710	1062.64	-1.779	0.245	-7.263	3.8e-13	2.2e-11	down	3	PCOLCE2	142815922	142889206	procollagen C-endope...	no	no	no	no
ENSG00000163739	77.105	2.847	0.629	4.527	6e-06	8.6e-05	up	4	CXCL1	73869393	73871308	C-X-C motif chemokin...	no	no	no	no
ENSG00000163814	574.879	0.77	0.25	3.079	0.002	0.014	up	3	CDCP1	45082277	45146422	CUB domain containin...	no	no	no	no
ENSG00000163815	245.187	-1.556	0.252	-6.162	7.2e-10	2.4e-08	down	3	CLEC3B	45001548	45036071	C-type lectin domain...	no	no	no	no
ENSG00000163827	633.212	-1.566	0.166	-9.431	4.1e-21	7.2e-19	down	3	LRRC2	46515385	46606948	leucine rich repeat ...	no	no	no	no
ENSG00000163840	1908.11	0.766	0.244	3.136	0.002	0.011	up	3	DTX3L	122564338	122575203	deltex E3 ubiquitin ...	no	no	no	no
ENSG00000163874	414.878	0.68	0.168	4.049	5.1e-05	0.00057	up	1	ZC3H12A	37474580	37484377	zinc finger CCCH-typ...	no	no	no	no
ENSG00000163879	142.61	3.392	0.409	8.285	1.2e-16	1.1e-14	up	1	DNALI1	37556919	37566857	dynein axonemal ligh...	no	no	no	no
ENSG00000163935	145.858	-0.651	0.14	-4.652	3.3e-06	5e-05	down	3	SFMBT1	52903572	53046750	Scm like with four m...	no	no	no	no
ENSG00000164023	1586.81	-0.734	0.224	-3.279	0.001	0.008	down	4	SGMS2	107824563	107915047	sphingomyelin syntha...	no	no	no	no
ENSG00000164048	359.668	-0.707	0.114	-6.224	4.8e-10	1.7e-08	down	3	ZNF589	48241100	48299253	zinc finger protein ...	no	no	no	no
ENSG00000164050	1195.99	-0.847	0.235	-3.603	0.00031	0.003	down	3	PLXNB1	48403854	48430086	plexin B1 [Source:HG...	no	no	no	no
ENSG00000164078	36.957	-2.658	0.354	-7.507	6e-14	3.9e-12	down	3	MST1R	49887002	49903873	macrophage stimulati...	no	no	no	no
ENSG00000164114	843.35	0.73	0.205	3.553	0.00038	0.003	up	4	MAP9	155342658	155376970	microtubule associat...	no	no	no	no
ENSG00000164125	1289.73	-1.403	0.317	-4.428	9.5e-06	0.00013	down	4	GASK1B	158124474	158173318	golgi associated kin...	no	no	no	no
ENSG00000164136	130.892	0.809	0.191	4.244	2.2e-05	0.00027	up	4	IL15	141636583	141733987	interleukin 15 [Sour...	no	no	no	no
ENSG00000164197	77.247	-1.4	0.327	-4.288	1.8e-05	0.00022	down	5	RNF180	64165843	64372869	ring finger protein ...	no	no	no	no
ENSG00000164241	117.916	-0.75	0.158	-4.746	2.1e-06	3.4e-05	down	5	C5orf63	127045235	127073506	chromosome 5 open re...	no	no	no	no
ENSG00000164251	291.395	3.841	0.284	13.547	8.2e-42	7.2e-39	up	5	F2RL1	76818933	76835315	F2R like trypsin rec...	no	no	no	no
ENSG00000164342	166.19	-1.066	0.291	-3.663	0.00025	0.002	down	4	TLR3	186068911	186088073	toll like receptor 3...	no	no	no	no
ENSG00000164418	501.198	-1.229	0.417	-2.951	0.003	0.019	down	6	GRIK2	100962701	102081622	glutamate ionotropic...	no	no	no	no
ENSG00000164440	27.486	3.261	0.718	4.541	5.6e-06	8.1e-05	up	6	TXLNB	139240061	139291998	taxilin beta [Source...	no	no	no	no
ENSG00000164484	2358.02	-1.982	0.167	-11.849	2.2e-32	1e-29	down	6	TMEM200A	130366017	130443067	transmembrane protei...	no	no	no	no
ENSG00000164506	3494.2	-0.605	0.114	-5.311	1.1e-07	2.3e-06	down	6	STXBP5	147204180	147391010	syntaxin binding pro...	no	no	no	no
ENSG00000164509	50.834	2.656	0.589	4.511	6.5e-06	9.3e-05	up	5	IL31RA	55851357	55922854	interleukin 31 recep...	no	no	no	no
ENSG00000164530	310.982	-1.895	0.525	-3.608	0.00031	0.003	down	6	PI16	36948263	36964837	peptidase inhibitor ...	no	no	no	no
ENSG00000164619	2361.94	0.624	0.124	5.012	5.4e-07	1e-05	up	7	BMPER	33904308	34156427	BMP binding endothel...	no	no	no	no
ENSG00000164683	115.482	1.313	0.305	4.31	1.6e-05	0.00021	up	8	HEY1	79762371	79767857	hes related family b...	no	no	no	no
ENSG00000164713	5960.81	-0.632	0.19	-3.322	0.00089	0.007	down	7	BRI3	98252379	98310441	brain protein I3 [So...	no	no	no	no
ENSG00000164742	56.175	1.48	0.377	3.921	8.8e-05	0.00092	up	7	ADCY1	45574140	45723116	adenylate cyclase 1 ...	no	no	no	no
ENSG00000164904	3422.37	-0.596	0.2	-2.973	0.003	0.018	down	5	ALDH7A1	126531200	126595362	aldehyde dehydrogena...	no	no	no	no
ENSG00000164920	582.673	1.843	0.319	5.775	7.7e-09	2.1e-07	up	8	OSR2	98944403	98952104	odd-skipped related ...	no	no	no	no
ENSG00000164929	1490.41	0.906	0.187	4.842	1.3e-06	2.2e-05	up	8	BAALC	103140713	103230305	BAALC binder of MAP3...	no	no	no	no
ENSG00000164938	1640.08	-0.629	0.217	-2.9	0.004	0.022	down	8	TP53INP1	94925972	94949378	tumor protein p53 in...	no	no	no	no
ENSG00000165029	1161.41	0.619	0.211	2.928	0.003	0.02	up	9	ABCA1	104781006	104928155	ATP binding cassette...	no	no	no	no
ENSG00000165072	104.488	-1.961	0.308	-6.374	1.8e-10	6.9e-09	down	9	MAMDC2	70043848	70226972	MAM domain containin...	no	no	no	no
ENSG00000165092	65.59	-4.05	0.53	-7.639	2.2e-14	1.5e-12	down	9	ALDH1A1	72900671	73080442	aldehyde dehydrogena...	no	no	no	no
ENSG00000165244	433.28	-1.212	0.224	-5.403	6.6e-08	1.5e-06	down	9	ZNF367	96385941	96418370	zinc finger protein ...	no	no	no	no
ENSG00000165246	1645.07	1.178	0.154	7.63	2.3e-14	1.6e-12	up	Y	NLGN4Y	14522573	14845654	neuroligin 4 Y-linke...	no	no	no	no
ENSG00000165323	209.381	-1.461	0.255	-5.736	9.7e-09	2.6e-07	down	11	FAT3	92224818	92896473	FAT atypical cadheri...	no	no	no	no
ENSG00000165449	21.553	-2.623	0.508	-5.165	2.4e-07	4.8e-06	down	10	SLC16A9	59650764	59736002	solute carrier famil...	no	no	no	no
ENSG00000165475	271.858	-0.59	0.139	-4.231	2.3e-05	0.00028	down	13	CRYL1	20403666	20525873	crystallin lambda 1 ...	no	no	no	no
ENSG00000165507	580.453	0.703	0.241	2.913	0.004	0.021	up	10	DEPP1	44970981	44978809	DEPP1 autophagy regu...	no	no	no	no
ENSG00000165521	63.343	4.491	1.039	4.321	1.6e-05	0.0002	up	14	EML5	88612431	88792953	EMAP like 5 [Source:...	no	no	no	no
ENSG00000165617	2163	1.164	0.182	6.388	1.7e-10	6.4e-09	up	14	DACT1	58633967	58648321	dishevelled binding ...	no	no	no	no
ENSG00000165655	2257.29	-0.694	0.217	-3.204	0.001	0.009	down	10	ZNF503	75397830	75401764	zinc finger protein ...	no	no	no	no
ENSG00000165795	59.264	2.207	0.383	5.769	8e-09	2.2e-07	up	14	NDRG2	21016763	21070872	NDRG family member 2...	no	no	no	no
ENSG00000165821	190.609	2.255	0.223	10.106	5.2e-24	1.2e-21	up	14	SALL2	21521080	21537216	spalt like transcrip...	no	no	no	no
ENSG00000165912	692.72	1.456	0.123	11.846	2.2e-32	1e-29	up	11	PACSIN3	47177522	47186443	protein kinase C and...	no	no	no	no
ENSG00000165949	164.091	2.468	0.421	5.861	4.6e-09	1.3e-07	up	14	IFI27	94104836	94116695	interferon alpha ind...	no	no	no	no
ENSG00000165983	485.861	-0.745	0.241	-3.087	0.002	0.013	down	10	PTER	16436943	16513745	phosphotriesterase r...	no	no	no	no
ENSG00000166046	443.214	0.661	0.232	2.846	0.004	0.025	up	12	TCP11L2	106301929	106347003	t-complex 11 like 2 ...	no	no	no	no
ENSG00000166106	121.615	1.064	0.346	3.077	0.002	0.014	up	11	ADAMTS15	130448645	130476645	ADAM metallopeptidas...	no	no	no	no
ENSG00000166206	82.319	9	0.814	11.052	2.1e-28	6.9e-26	up	15	GABRB3	26543552	26939539	gamma-aminobutyric a...	no	no	no	no
ENSG00000166311	7114.89	-0.598	0.134	-4.448	8.7e-06	0.00012	down	11	SMPD1	6390440	6394998	sphingomyelin phosph...	no	no	no	no
ENSG00000166321	113.394	0.658	0.202	3.255	0.001	0.008	up	10	NUDT13	73110375	73131828	nudix hydrolase 13 [...	no	no	no	no
ENSG00000166340	5835.14	-0.699	0.214	-3.275	0.001	0.008	down	11	TPP1	6612768	6619448	tripeptidyl peptidas...	no	no	no	no
ENSG00000166341	2589.87	1.531	0.194	7.891	3e-15	2.2e-13	up	11	DCHS1	6621330	6655809	dachsous cadherin-re...	no	no	no	no
ENSG00000166343	114.166	0.655	0.208	3.15	0.002	0.011	up	10	MSS51	73423579	73433561	MSS51 mitochondrial ...	no	no	no	no
ENSG00000166347	910.586	-0.885	0.205	-4.317	1.6e-05	0.0002	down	18	CYB5A	74250846	74291973	cytochrome b5 type A...	no	no	no	no
ENSG00000166432	68.618	-1.148	0.267	-4.294	1.8e-05	0.00022	down	X	ZMAT1	101882288	101932031	zinc finger matrin-t...	no	no	yes	no
ENSG00000166436	727.908	0.685	0.136	5.049	4.4e-07	8.4e-06	up	11	TRIM66	8612037	8682694	tripartite motif con...	no	no	no	no
ENSG00000166446	715.924	-0.644	0.12	-5.37	7.9e-08	1.7e-06	down	16	CDYL2	80597907	80804598	chromodomain Y like ...	no	no	no	no
ENSG00000166448	178.513	-2.094	0.283	-7.399	1.4e-13	8.4e-12	down	7	TMEM130	98846488	98870771	transmembrane protei...	no	no	no	no
ENSG00000166670	51.758	3.511	0.705	4.981	6.3e-07	1.2e-05	up	11	MMP10	102770502	102780628	matrix metallopeptid...	no	no	no	no
ENSG00000166897	129.753	3.63	0.553	6.569	5.1e-11	2.1e-09	up	22	ELFN2	37367960	37427479	extracellular leucin...	no	no	no	no
ENSG00000166922	534.261	-1.481	0.304	-4.879	1.1e-06	1.9e-05	down	15	SCG5	32641676	32697098	secretogranin V [Sou...	no	no	no	no
ENSG00000167034	242.209	-0.768	0.187	-4.119	3.8e-05	0.00044	down	8	NKX3-1	23678697	23682938	NK3 homeobox 1 [Sour...	no	no	no	no
ENSG00000167100	332.547	2.217	0.236	9.412	4.9e-21	8.3e-19	up	17	SAMD14	50110040	50130160	sterile alpha motif ...	no	no	no	no
ENSG00000167103	163.148	0.803	0.278	2.887	0.004	0.023	up	9	PIP5KL1	127920881	127930785	phosphatidylinositol...	no	no	no	no
ENSG00000167363	145.076	-0.796	0.295	-2.697	0.007	0.036	down	17	FN3K	82735615	82751196	fructosamine 3 kinas...	no	no	no	no
ENSG00000167371	413.735	1.107	0.144	7.709	1.3e-14	8.8e-13	up	16	PRRT2	29811382	29815892	proline rich transme...	no	no	no	no
ENSG00000167393	668.051	0.709	0.126	5.65	1.6e-08	4.1e-07	up	X	PPP2R3B	333933	386955	protein phosphatase ...	PAR1	no	no	no
ENSG00000167470	3701.49	1.17	0.091	12.796	1.7e-37	9.9e-35	up	19	MIDN	1248553	1259143	midnolin [Source:HGN...	no	no	no	no
ENSG00000167487	198.198	-0.883	0.232	-3.807	0.00014	0.001	down	19	KLHL26	18637025	18671721	kelch like family me...	no	no	no	no
ENSG00000167703	145.061	-0.853	0.223	-3.832	0.00013	0.001	down	17	SLC43A2	1569268	1628886	solute carrier famil...	no	no	no	no
ENSG00000167716	1217.68	-0.6	0.202	-2.969	0.003	0.018	down	17	WDR81	1716523	1738599	WD repeat domain 81 ...	no	no	no	no
ENSG00000167767	151.334	1.414	0.252	5.616	2e-08	4.8e-07	up	12	KRT80	52168996	52192014	keratin 80 [Source:H...	no	no	no	no
ENSG00000167771	201.545	0.917	0.247	3.714	0.0002	0.002	up	11	RCOR2	63911230	63917164	REST corepressor 2 [...	no	no	no	no
ENSG00000167772	383.89	-1.291	0.328	-3.931	8.5e-05	0.00089	down	19	ANGPTL4	8363289	8374370	angiopoietin like 4 ...	no	no	no	no
ENSG00000167889	61.796	1.896	0.37	5.123	3e-07	5.9e-06	up	17	MGAT5B	76868404	76950393	alpha-1,6-mannosylgl...	no	no	no	no
ENSG00000167912	59.13	-0.928	0.299	-3.097	0.002	0.013	down	8	TOX-DT	59119040	59123478	TOX divergent transc...	no	no	no	no
ENSG00000167925	588.401	-0.612	0.172	-3.559	0.00037	0.003	down	17	GHDC	42188799	42194532	GH3 domain containin...	no	no	no	no
ENSG00000167972	53.876	1.143	0.297	3.846	0.00012	0.001	up	16	ABCA3	2275881	2340746	ATP binding cassette...	no	no	no	no
ENSG00000167996	32529.9	-1.109	0.265	-4.188	2.8e-05	0.00033	down	11	FTH1	61959718	61967634	ferritin heavy chain...	no	no	no	no
ENSG00000168038	168.809	-0.656	0.155	-4.238	2.3e-05	0.00027	down	3	ULK4	41246599	41962130	unc-51 like kinase 4...	no	no	no	no
ENSG00000168140	4912.15	-0.933	0.175	-5.331	9.8e-08	2.1e-06	down	16	VASN	4371848	4383538	vasorin [Source:HGNC...	no	no	no	no
ENSG00000168209	1747.89	1.264	0.417	3.028	0.002	0.016	up	10	DDIT4	72273919	72276036	DNA damage inducible...	no	no	no	no
ENSG00000168234	696.198	-0.666	0.176	-3.776	0.00016	0.002	down	18	TTC39C	23992773	24135610	tetratricopeptide re...	no	no	no	no
ENSG00000168255	123.135	0.862	0.143	6.027	1.7e-09	5.2e-08	up	7	POLR2J3	102537918	102572653	RNA polymerase II su...	no	no	no	no
ENSG00000168398	582.705	1.157	0.233	4.962	7e-07	1.3e-05	up	14	BDKRB2	96204679	96244166	bradykinin receptor ...	no	no	no	no
ENSG00000168477	2425.74	-0.904	0.258	-3.51	0.00045	0.004	down	6	TNXB	32041153	32115334	tenascin XB [Source:...	no	no	no	no
ENSG00000168487	10702.3	0.661	0.234	2.824	0.005	0.026	up	8	BMP1	22165140	22212326	bone morphogenetic p...	no	no	no	no
ENSG00000168496	1212.49	-0.638	0.221	-2.884	0.004	0.023	down	11	FEN1	61792911	61797238	flap structure-speci...	no	no	no	no
ENSG00000168497	324.419	-1.717	0.324	-5.298	1.2e-07	2.5e-06	down	2	CAVIN2	191834310	191847088	caveolae associated ...	no	no	no	no
ENSG00000168505	155.962	7.998	2.172	3.683	0.00023	0.002	up	2	GBX2	236165236	236168386	gastrulation brain h...	no	no	no	no
ENSG00000168528	1023.93	-2.103	0.369	-5.704	1.2e-08	3.1e-07	down	1	SERINC2	31409565	31434680	serine incorporator ...	no	no	no	no
ENSG00000168542	342795	0.739	0.21	3.525	0.00042	0.004	up	2	COL3A1	188974373	189012746	collagen type III al...	no	no	no	no
ENSG00000168575	2911.83	-0.915	0.203	-4.509	6.5e-06	9.3e-05	down	8	SLC20A2	42416475	42541926	solute carrier famil...	no	no	no	no
ENSG00000168646	242.173	-0.756	0.277	-2.735	0.006	0.033	down	17	AXIN2	65528563	65561648	axin 2 [Source:HGNC ...	no	no	no	no
ENSG00000168661	129.307	-0.63	0.178	-3.534	0.00041	0.004	down	19	ZNF30	34926903	34945170	zinc finger protein ...	no	no	no	no
ENSG00000168675	173.791	-0.817	0.297	-2.747	0.006	0.032	down	18	LDLRAD4	13217498	13652755	low density lipoprot...	no	no	no	no
ENSG00000168679	307.095	1.185	0.128	9.277	1.7e-20	2.7e-18	up	1	SLC16A4	110362851	110391082	solute carrier famil...	no	no	no	no
ENSG00000168685	2769.98	-2.017	0.295	-6.843	7.7e-12	3.7e-10	down	5	IL7R	35852695	35879603	interleukin 7 recept...	no	no	no	no
ENSG00000168734	1830.57	1.166	0.166	7.015	2.3e-12	1.2e-10	up	20	PKIG	44531785	44624247	cAMP-dependent prote...	no	no	no	no
ENSG00000168758	1179.56	0.674	0.163	4.129	3.7e-05	0.00042	up	2	SEMA4C	96859718	96870757	semaphorin 4C [Sourc...	no	no	no	no
ENSG00000168916	406.51	2.398	0.272	8.815	1.2e-18	1.5e-16	up	5	ZNF608	124636913	124748807	zinc finger protein ...	no	no	no	no
ENSG00000169026	328.616	-0.803	0.29	-2.773	0.006	0.03	down	4	SLC49A3	681829	689271	solute carrier famil...	no	no	no	no
ENSG00000169084	896.582	0.621	0.179	3.46	0.00054	0.004	up	X	DHRSX	2219506	2502805	dehydrogenase/reduct...	PAR1	no	no	no
ENSG00000169093	1413.91	0.763	0.134	5.709	1.1e-08	3e-07	up	X	ASMTL	1403139	1453762	acetylserotonin O-me...	PAR1	no	no	no
ENSG00000169129	65.661	4.667	1.103	4.232	2.3e-05	0.00028	up	10	AFAP1L2	114294824	114404756	actin filament assoc...	no	no	no	no
ENSG00000169174	142.066	-0.774	0.244	-3.179	0.001	0.01	down	1	PCSK9	55039447	55064852	proprotein convertas...	no	no	no	no
ENSG00000169203	37.659	-1.272	0.342	-3.719	0.0002	0.002	down	16	NPIPB12	29483534	29506408	nuclear pore complex...	no	no	no	no
ENSG00000169220	123.722	-0.873	0.254	-3.43	0.0006	0.005	down	5	RGS14	177357924	177372596	regulator of G prote...	no	no	no	no
ENSG00000169247	101.092	-0.752	0.208	-3.612	0.0003	0.003	down	5	SH3TC2	148923639	149063163	SH3 domain and tetra...	no	no	no	no
ENSG00000169255	791.66	-0.582	0.114	-5.124	3e-07	5.9e-06	down	3	B3GALNT1	161083883	161105411	beta-1,3-N-acetylgal...	no	no	no	no
ENSG00000169258	256.459	-0.721	0.203	-3.56	0.00037	0.003	down	5	GPRIN1	176595802	176610156	G protein regulated ...	no	no	no	no
ENSG00000169302	66.281	0.788	0.262	3.003	0.003	0.017	up	5	STK32A	147234963	147387855	serine/threonine kin...	no	no	no	no
ENSG00000169379	718.087	-0.677	0.124	-5.452	5e-08	1.1e-06	down	3	ARL13B	93980139	94055678	ADP ribosylation fac...	no	no	no	no
ENSG00000169429	84.295	3.939	0.878	4.485	7.3e-06	0.0001	up	4	CXCL8	73740519	73743716	C-X-C motif chemokin...	no	no	no	no
ENSG00000169432	468.031	2.016	0.292	6.902	5.1e-12	2.5e-10	up	2	SCN9A	166195185	166376001	sodium voltage-gated...	no	no	no	no
ENSG00000169499	1822.85	0.663	0.121	5.494	3.9e-08	9.2e-07	up	8	PLEKHA2	38901235	38973912	pleckstrin homology ...	no	no	no	no
ENSG00000169507	18.365	-3.959	0.826	-4.793	1.6e-06	2.7e-05	down	2	SLC38A11	164894354	164955525	solute carrier famil...	no	no	no	no
ENSG00000169515	1594.87	1.102	0.142	7.759	8.6e-15	6e-13	up	19	CCDC8	46410329	46413564	coiled-coil domain c...	no	no	no	no
ENSG00000169583	346.011	-1.169	0.278	-4.202	2.6e-05	0.00031	down	9	CLIC3	136994608	136996568	chloride intracellul...	no	no	no	no
ENSG00000169750	196.564	0.64	0.248	2.584	0.01	0.047	up	17	RAC3	82031678	82034204	Rac family small GTP...	no	no	no	no
ENSG00000169760	714.644	-0.926	0.179	-5.187	2.1e-07	4.3e-06	down	3	NLGN1	173396284	174294372	neuroligin 1 [Source...	no	no	no	no
ENSG00000169764	8157.89	-0.737	0.184	-4.009	6.1e-05	0.00067	down	2	UGP2	63840952	63891562	UDP-glucose pyrophos...	no	no	no	no
ENSG00000169851	382.333	-4.786	0.363	-13.17	1.3e-39	8.6e-37	down	4	PCDH7	30720369	31146805	protocadherin 7 [Sou...	no	no	no	no
ENSG00000169862	32.481	5.354	1.15	4.657	3.2e-06	4.9e-05	up	5	CTNND2	10971836	11904446	catenin delta 2 [Sou...	no	no	no	no
ENSG00000170049	100.968	0.819	0.187	4.375	1.2e-05	0.00016	up	17	KCNAB3	7921859	7929856	potassium voltage-ga...	no	no	no	no
ENSG00000170088	862.651	-0.614	0.189	-3.25	0.001	0.008	down	4	TMEM192	165070608	165208549	transmembrane protei...	no	no	no	no
ENSG00000170160	395.481	-1.658	0.424	-3.908	9.3e-05	0.00097	down	17	CCDC144A	16689537	16777881	coiled-coil domain c...	no	no	no	no
ENSG00000170214	168.834	-1.241	0.251	-4.944	7.7e-07	1.4e-05	down	5	ADRA1B	159865080	159973012	adrenoceptor alpha 1...	no	no	no	no
ENSG00000170340	681.963	-0.596	0.199	-2.997	0.003	0.017	down	2	B3GNT2	62196115	62224731	UDP-GlcNAc:betaGal b...	no	no	no	no
ENSG00000170379	145.221	1.185	0.206	5.743	9.3e-09	2.5e-07	up	7	TCAF2	143620952	143730410	TRPM8 channel associ...	no	no	no	no
ENSG00000170385	2362.11	-0.629	0.103	-6.133	8.7e-10	2.9e-08	down	1	SLC30A1	211571568	211579161	solute carrier famil...	no	no	no	no
ENSG00000170390	1050.11	-0.593	0.213	-2.788	0.005	0.029	down	4	DCLK2	150078445	150257438	doublecortin like ki...	no	no	no	no
ENSG00000170396	36.512	3.383	0.58	5.828	5.6e-09	1.6e-07	up	2	ZNF804A	184598529	184939492	zinc finger protein ...	no	no	no	no
ENSG00000170412	48.743	5.928	1.605	3.694	0.00022	0.002	up	17	GPRC5C	74424851	74451653	G protein-coupled re...	no	no	no	no
ENSG00000170421	134.819	1.201	0.267	4.491	7.1e-06	0.0001	up	12	KRT8	52897187	52949954	keratin 8 [Source:HG...	no	no	no	no
ENSG00000170456	997.542	-0.64	0.177	-3.618	0.0003	0.003	down	12	DENND5B	31382226	31591136	DENN domain containi...	no	no	no	no
ENSG00000170477	5.028	4.474	1.168	3.829	0.00013	0.001	up	12	KRT4	52806549	52814116	keratin 4 [Source:HG...	no	no	no	no
ENSG00000170485	615.367	-1.123	0.183	-6.147	7.9e-10	2.6e-08	down	2	NPAS2	100820139	100996829	neuronal PAS domain ...	no	no	no	no
ENSG00000170549	213.209	4.528	0.509	8.902	5.5e-19	7.1e-17	up	5	IRX1	3595832	3601403	iroquois homeobox 1 ...	no	no	no	no
ENSG00000170558	9374.9	0.687	0.239	2.875	0.004	0.023	up	18	CDH2	27932879	28177946	cadherin 2 [Source:H...	no	no	no	no
ENSG00000170561	1014.74	1.318	0.159	8.297	1.1e-16	9.9e-15	up	5	IRX2	2745845	2751677	iroquois homeobox 2 ...	no	no	no	no
ENSG00000170624	10245.3	-0.708	0.183	-3.87	0.00011	0.001	down	5	SGCD	155870344	156767788	sarcoglycan delta [S...	no	no	no	no
ENSG00000170667	268.626	0.621	0.223	2.789	0.005	0.029	up	7	RASA4B	102479976	102517777	RAS p21 protein acti...	no	no	no	no
ENSG00000170689	245.737	6.917	0.852	8.119	4.7e-16	3.9e-14	up	17	HOXB9	48621156	48626358	homeobox B9 [Source:...	no	no	no	no
ENSG00000170734	2675.66	-0.729	0.099	-7.369	1.7e-13	1e-11	down	6	POLH	43576185	43620523	DNA polymerase eta [...	no	no	no	no
ENSG00000170775	66.823	9.111	1.209	7.539	4.7e-14	3.1e-12	up	7	GPR37	124743885	124765792	G protein-coupled re...	no	no	no	no
ENSG00000170801	1123.39	1.221	0.177	6.884	5.8e-12	2.8e-10	up	4	HTRA3	8269754	8307098	HtrA serine peptidas...	no	no	no	no
ENSG00000170961	5232.52	-0.688	0.183	-3.755	0.00017	0.002	down	8	HAS2	121612116	121641440	hyaluronan synthase ...	no	no	no	no
ENSG00000171084	89.74	0.937	0.2	4.695	2.7e-06	4.2e-05	up	3	FAM86JP	125916624	125928595	family with sequence...	no	no	no	no
ENSG00000171208	724.639	1.049	0.241	4.361	1.3e-05	0.00017	up	16	NETO2	47077703	47143945	neuropilin and tollo...	no	no	no	no
ENSG00000171223	2161.51	1.08	0.19	5.676	1.4e-08	3.6e-07	up	19	JUNB	12791486	12793315	JunB proto-oncogene,...	no	no	no	no
ENSG00000171246	112.485	1.52	0.463	3.28	0.001	0.008	up	17	NPTX1	80466834	80477843	neuronal pentraxin 1...	no	no	no	no
ENSG00000171298	2905.69	-0.934	0.229	-4.08	4.5e-05	0.00051	down	17	GAA	80101556	80119881	alpha glucosidase [S...	no	no	no	no
ENSG00000171310	688.266	-1.825	0.175	-10.412	2.2e-25	5.3e-23	down	12	CHST11	104455295	104762014	carbohydrate sulfotr...	no	no	no	no
ENSG00000171320	311.839	-0.906	0.271	-3.338	0.00084	0.006	down	8	ESCO2	27771949	27812640	establishment of sis...	no	no	no	no
ENSG00000171345	876.765	1.648	0.228	7.227	4.9e-13	2.7e-11	up	17	KRT19	41523617	41528308	keratin 19 [Source:H...	no	no	no	no
ENSG00000171365	548.458	-0.581	0.166	-3.508	0.00045	0.004	down	X	CLCN5	49922596	50099235	chloride voltage-gat...	no	no	no	yes
ENSG00000171385	555.125	-2.914	0.313	-9.296	1.5e-20	2.4e-18	down	1	KCND3	111770662	111989668	potassium voltage-ga...	no	no	no	no
ENSG00000171388	195.612	1.414	0.375	3.766	0.00017	0.002	up	X	APLN	129645259	129654956	apelin [Source:HGNC ...	no	no	no	yes
ENSG00000171408	733.974	2.032	0.25	8.116	4.8e-16	3.9e-14	up	6	PDE7B	135851701	136195574	phosphodiesterase 7B...	no	no	no	no
ENSG00000171658	28.811	-1.757	0.315	-5.573	2.5e-08	6.1e-07	down	3	NMRAL2P	185960039	185979837	NmrA like redox sens...	no	no	no	no
ENSG00000171680	738.82	1.147	0.212	5.401	6.6e-08	1.5e-06	up	1	PLEKHG5	6467122	6520074	pleckstrin homology ...	no	no	no	no
ENSG00000171798	46.498	3.411	0.436	7.822	5.2e-15	3.7e-13	up	10	KNDC1	133160219	133226412	kinase non-catalytic...	no	no	no	no
ENSG00000171951	178.534	-1.394	0.306	-4.554	5.3e-06	7.7e-05	down	2	SCG2	223596940	223602361	secretogranin II [So...	no	no	no	no
ENSG00000171992	1800.55	0.812	0.187	4.349	1.4e-05	0.00018	up	5	SYNPO	150601080	150659207	synaptopodin [Source...	no	no	no	no
ENSG00000172183	163.624	-1.284	0.384	-3.349	0.00081	0.006	down	15	ISG20	88635670	88656483	interferon stimulate...	no	no	no	no
ENSG00000172197	312.277	-0.585	0.167	-3.508	0.00045	0.004	down	6	MBOAT1	20099684	20212469	membrane bound O-acy...	no	no	no	no
ENSG00000172292	959.592	-0.681	0.16	-4.248	2.2e-05	0.00026	down	2	CERS6	168456249	168775134	ceramide synthase 6 ...	no	no	no	no
ENSG00000172331	1268.59	0.758	0.281	2.702	0.007	0.035	up	7	BPGM	134646811	134679816	bisphosphoglycerate ...	no	no	no	no
ENSG00000172346	565.75	2.247	0.216	10.425	1.9e-25	4.8e-23	up	22	CSDC2	41561010	41577741	cold shock domain co...	no	no	no	no
ENSG00000172379	1847.43	0.783	0.207	3.778	0.00016	0.002	up	15	ARNT2	80404350	80597933	aryl hydrocarbon rec...	no	no	no	no
ENSG00000172432	3667.25	0.771	0.233	3.316	0.00091	0.007	up	6	GTPBP2	43605316	43629264	GTP binding protein ...	no	no	no	no
ENSG00000172548	82.201	4.485	0.429	10.458	1.3e-25	3.5e-23	up	5	NIPAL4	157460213	157474722	NIPA like domain con...	no	no	no	no
ENSG00000172575	244.369	3.763	0.472	7.968	1.6e-15	1.2e-13	up	15	RASGRP1	38488103	38565575	RAS guanyl releasing...	no	no	no	no
ENSG00000172803	79.999	1.308	0.238	5.485	4.1e-08	9.6e-07	up	11	SNX32	65833834	65856896	sorting nexin 32 [So...	no	no	no	no
ENSG00000172817	179.114	1.721	0.38	4.533	5.8e-06	8.4e-05	up	8	CYP7B1	64587763	64798737	cytochrome P450 fami...	no	no	no	no
ENSG00000172986	547.572	0.693	0.199	3.478	0.00051	0.004	up	3	GXYLT2	72888046	72998138	glucoside xylosyltra...	no	no	no	no
ENSG00000173114	101.237	0.838	0.274	3.055	0.002	0.014	up	7	LRRN3	111091006	111125454	leucine rich repeat ...	no	no	no	no
ENSG00000173193	1924.66	0.621	0.196	3.166	0.002	0.011	up	3	PARP14	122680839	122730840	poly(ADP-ribose) pol...	no	no	no	no
ENSG00000173267	56.91	1.077	0.273	3.939	8.2e-05	0.00087	up	10	SNCG	86958599	86963258	synuclein gamma [Sou...	no	no	no	no
ENSG00000173281	705.721	-0.745	0.2	-3.733	0.00019	0.002	down	8	PPP1R3B	9136255	9151574	protein phosphatase ...	no	no	no	no
ENSG00000173295	101.84	-0.817	0.211	-3.881	0.0001	0.001	down	8	FAM86B3P	8228605	8237275	family with sequence...	no	no	no	no
ENSG00000173334	257.54	1.405	0.167	8.431	3.4e-17	3.4e-15	up	8	TRIB1	125430358	125438403	tribbles pseudokinas...	no	no	no	no
ENSG00000173376	1659.13	-1.394	0.387	-3.606	0.00031	0.003	down	4	NDNF	121035613	121073021	neuron derived neuro...	no	no	no	no
ENSG00000173535	71.615	-1.605	0.272	-5.908	3.5e-09	1e-07	down	8	TNFRSF10C	23102921	23117445	TNF receptor superfa...	no	no	no	no
ENSG00000173546	9568.18	0.94	0.295	3.184	0.001	0.01	up	15	CSPG4	75674322	75712848	chondroitin sulfate ...	no	no	no	no
ENSG00000173597	62.103	8.124	1.394	5.828	5.6e-09	1.6e-07	up	4	SULT1B1	69721167	69787961	sulfotransferase fam...	no	no	no	no
ENSG00000173641	5234.08	-1.07	0.146	-7.348	2e-13	1.2e-11	down	1	HSPB7	16014028	16019594	heat shock protein f...	no	no	no	no
ENSG00000173801	224.459	2.728	0.274	9.949	2.6e-23	5.3e-21	up	17	JUP	41754604	41786931	junction plakoglobin...	no	no	no	no
ENSG00000173926	94.854	-0.847	0.243	-3.49	0.00048	0.004	down	5	MARCHF3	126867714	127030558	membrane associated ...	no	no	no	no
ENSG00000174028	154.986	-0.74	0.222	-3.342	0.00083	0.006	down	X	FAM3C2P	23075758	23076767	family with sequence...	no	no	no	no
ENSG00000174032	903.784	-1.149	0.159	-7.23	4.8e-13	2.7e-11	down	13	SLC25A30	45393316	45418455	solute carrier famil...	no	no	no	no
ENSG00000174080	2270.94	0.946	0.188	5.029	4.9e-07	9.3e-06	up	11	CTSF	66563464	66568879	cathepsin F [Source:...	no	no	no	no
ENSG00000174130	71.572	0.99	0.166	5.951	2.7e-09	8e-08	up	4	TLR6	38822897	38856817	toll like receptor 6...	no	no	no	no
ENSG00000174348	7400.56	-1.612	0.192	-8.401	4.4e-17	4.3e-15	down	1	PODN	53062052	53085501	podocan [Source:HGNC...	no	no	no	no
ENSG00000174370	45.63	-0.729	0.263	-2.772	0.006	0.03	down	11	KCNJ5-AS1	128899565	128906044	KCNJ5 antisense RNA ...	no	no	no	no
ENSG00000174371	355.137	-0.719	0.261	-2.753	0.006	0.031	down	1	EXO1	241847967	241895148	exonuclease 1 [Sourc...	no	no	no	no
ENSG00000174516	435.843	-0.582	0.21	-2.776	0.006	0.03	down	11	PELI3	66466327	66477337	pellino E3 ubiquitin...	no	no	no	no
ENSG00000174599	160.087	0.668	0.179	3.732	0.00019	0.002	up	4	TRAM1L1	117083554	117085576	translocation associ...	no	no	no	no
ENSG00000174611	122.464	1.061	0.215	4.929	8.3e-07	1.5e-05	up	3	KY	134599923	134651636	kyphoscoliosis pepti...	no	no	no	no
ENSG00000174640	177.885	2.371	0.679	3.493	0.00048	0.004	up	3	SLCO2A1	133932701	134052184	solute carrier organ...	no	no	no	no
ENSG00000174804	748.531	-1.601	0.192	-8.327	8.3e-17	7.9e-15	down	11	FZD4	86945679	86955395	frizzled class recep...	no	no	no	no
ENSG00000174938	465.04	1.719	0.313	5.483	4.2e-08	9.7e-07	up	16	SEZ6L2	29871159	29899550	seizure related 6 ho...	no	no	no	no
ENSG00000174939	102.82	1.19	0.211	5.646	1.6e-08	4.1e-07	up	16	ASPHD1	29900375	29919864	aspartate beta-hydro...	no	no	no	no
ENSG00000174945	62.993	-1.384	0.336	-4.113	3.9e-05	0.00045	down	7	AMZ1	2679522	2775500	archaelysin family m...	no	no	no	no
ENSG00000175040	545.879	-1.767	0.238	-7.43	1.1e-13	6.8e-12	down	3	CHST2	143119771	143124014	carbohydrate sulfotr...	no	no	no	no
ENSG00000175084	622.461	4.2	0.299	14.056	7.1e-45	6.7e-42	up	2	DES	219418377	219426735	desmin [Source:HGNC ...	no	no	no	no
ENSG00000175130	1876.35	1.097	0.246	4.461	8.1e-06	0.00011	up	1	MARCKSL1	32333839	32336233	MARCKS like 1 [Sourc...	no	no	no	no
ENSG00000175183	3737.28	1.474	0.209	7.041	1.9e-12	9.9e-11	up	12	CSRP2	76858709	76879023	cysteine and glycine...	no	no	no	no
ENSG00000175265	3975.62	0.784	0.199	3.941	8.1e-05	0.00086	up	15	GOLGA8A	34378935	34437808	golgin A8 family mem...	no	no	no	no
ENSG00000175287	239.232	1.01	0.224	4.5	6.8e-06	9.6e-05	up	9	PHYHD1	128920966	128942041	phytanoyl-CoA dioxyg...	no	no	no	no
ENSG00000175294	91.521	-1.251	0.271	-4.623	3.8e-06	5.7e-05	down	11	CATSPER1	66016752	66026479	cation channel sperm...	no	no	no	no
ENSG00000175538	19.832	2.232	0.685	3.259	0.001	0.008	up	11	KCNE3	74454841	74467729	potassium voltage-ga...	no	no	no	no
ENSG00000175567	110.356	0.771	0.298	2.588	0.01	0.046	up	11	UCP2	73974672	73982843	uncoupling protein 2...	no	no	no	no
ENSG00000175611	98.059	0.772	0.178	4.327	1.5e-05	0.00019	up	9	ERCC6L2-AS1	95759231	95876049	ERCC6L2 antisense RN...	no	no	no	no
ENSG00000175832	134.063	1.192	0.339	3.516	0.00044	0.004	up	17	ETV4	43527844	43579620	ETS variant transcri...	no	no	no	no
ENSG00000175874	79.514	3.462	0.553	6.261	3.8e-10	1.4e-08	up	2	CREG2	101345550	101387503	cellular repressor o...	no	no	no	no
ENSG00000175920	19.38	-4.04	0.572	-7.058	1.7e-12	8.9e-11	down	4	DOK7	3463306	3501473	docking protein 7 [S...	no	no	no	no
ENSG00000176171	7749.86	1.071	0.172	6.213	5.2e-10	1.8e-08	up	10	BNIP3	131967684	131981967	BCL2 interacting pro...	no	no	no	no
ENSG00000176273	316.729	-0.757	0.174	-4.34	1.4e-05	0.00018	down	10	SLC35G1	93893973	93956062	solute carrier famil...	no	no	no	no
ENSG00000176485	295.159	-2.608	0.281	-9.277	1.7e-20	2.7e-18	down	11	PLAAT3	63573195	63616883	phospholipase A and ...	no	no	no	no
ENSG00000176593	252.762	0.619	0.188	3.289	0.001	0.007	up	19	ENSG00000176593	58002061	58011232	novel transcript, an...	no	no	no	no
ENSG00000176597	90.495	1.981	0.524	3.777	0.00016	0.002	up	3	B3GNT5	183253253	183298504	UDP-GlcNAc:betaGal b...	no	no	no	no
ENSG00000176658	10868.4	-1.601	0.358	-4.474	7.7e-06	0.00011	down	17	MYO1D	32492522	32877177	myosin ID [Source:HG...	no	no	no	no
ENSG00000176697	1579.68	-0.643	0.166	-3.887	0.0001	0.001	down	11	BDNF	27654893	27722058	brain derived neurot...	no	no	no	no
ENSG00000176728	222.296	1.103	0.236	4.68	2.9e-06	4.5e-05	up	Y	TTTY14	18772706	19077416	testis-specific tran...	no	no	no	no
ENSG00000176771	228.209	1.74	0.373	4.664	3.1e-06	4.8e-05	up	2	NCKAP5	132671788	133568463	NCK associated prote...	no	no	no	no
ENSG00000176826	299.551	1.289	0.37	3.484	0.00049	0.004	up	7	FKBP9P1	55682652	55713252	FKBP prolyl isomeras...	no	no	no	no
ENSG00000176842	1216.56	-0.867	0.254	-3.408	0.00065	0.005	down	16	IRX5	54930865	54934485	iroquois homeobox 5 ...	no	no	no	no
ENSG00000176845	2929.32	-0.921	0.219	-4.205	2.6e-05	0.00031	down	17	METRNL	83079609	83095122	meteorin like, glial...	no	no	no	no
ENSG00000176887	292.758	3.285	0.822	3.998	6.4e-05	0.0007	up	2	SOX11	5692384	5701385	SRY-box transcriptio...	no	no	no	no
ENSG00000176907	262.59	3.915	0.64	6.12	9.4e-10	3.1e-08	up	8	TCIM	40153482	40155310	transcriptional and ...	no	no	no	no
ENSG00000176928	546.797	-1.412	0.274	-5.147	2.7e-07	5.3e-06	down	5	GCNT4	75025346	75052558	glucosaminyl (N-acet...	no	no	no	no
ENSG00000176971	1391.02	1.733	0.321	5.404	6.5e-08	1.4e-06	up	11	FIBIN	26994112	26997087	fin bud initiation f...	no	no	no	no
ENSG00000176978	2538.23	-0.756	0.191	-3.955	7.7e-05	0.00082	down	9	DPP7	137110542	137118309	dipeptidyl peptidase...	no	no	no	no
ENSG00000177191	91.338	-0.668	0.232	-2.882	0.004	0.023	down	19	B3GNT8	41425359	41428730	UDP-GlcNAc:betaGal b...	no	no	no	no
ENSG00000177283	596.083	-0.933	0.158	-5.894	3.8e-09	1.1e-07	down	10	FZD8	35638247	35642296	frizzled class recep...	no	no	no	no
ENSG00000177337	96.542	0.79	0.206	3.839	0.00012	0.001	up	18	DLGAP1-AS1	3593732	3598363	DLGAP1 antisense RNA...	no	no	no	no
ENSG00000177374	1208.73	0.616	0.134	4.581	4.6e-06	6.9e-05	up	17	HIC1	2054154	2063241	HIC ZBTB transcripti...	no	no	no	no
ENSG00000177380	130.441	0.925	0.269	3.438	0.00059	0.005	up	19	PPFIA3	49119544	49151026	PTPRF interacting pr...	no	no	no	no
ENSG00000177426	1598.89	0.698	0.146	4.764	1.9e-06	3.1e-05	up	18	TGIF1	3411608	3459978	TGFB induced factor ...	no	no	no	no
ENSG00000177453	62.947	2.493	0.368	6.783	1.2e-11	5.4e-10	up	5	NIM1K	43192071	43280850	NIM1 serine/threonin...	no	no	no	no
ENSG00000177628	4339.31	-0.78	0.211	-3.702	0.00021	0.002	down	1	GBA1	155234452	155244699	glucosylceramidase b...	no	no	no	no
ENSG00000177675	65.331	1.53	0.3	5.101	3.4e-07	6.6e-06	up	12	CD163L1	7346685	7479897	CD163 molecule like ...	no	no	no	no
ENSG00000177679	211.002	-0.847	0.196	-4.315	1.6e-05	0.0002	down	7	SRRM3	76201896	76287288	serine/arginine repe...	no	no	no	no
ENSG00000177694	598.072	-0.61	0.214	-2.849	0.004	0.025	down	3	NAALADL2	174438573	175810548	N-acetylated alpha-l...	no	no	no	no
ENSG00000177721	56	1.203	0.216	5.576	2.5e-08	6e-07	up	5	ANXA2R	43039233	43043170	annexin A2 receptor ...	no	no	no	no
ENSG00000177822	381.24	1.736	0.184	9.419	4.5e-21	7.9e-19	up	4	TENM3-AS1	181874438	182145249	TENM3 antisense RNA ...	no	no	no	no
ENSG00000177943	521.997	0.668	0.184	3.62	0.00029	0.003	up	9	MAMDC4	136850943	136860799	MAM domain containin...	no	no	no	no
ENSG00000177989	60.053	1.336	0.51	2.622	0.009	0.043	up	22	ODF3B	50529710	50532506	outer dense fiber of...	no	no	no	no
ENSG00000177990	127.914	0.85	0.239	3.558	0.00037	0.003	up	12	DPY19L2	63558913	63668939	dpy-19 like 2 [Sourc...	no	no	no	no
ENSG00000178104	5300.52	-0.663	0.158	-4.198	2.7e-05	0.00032	down	1	PDE4DIP	148808140	149048286	phosphodiesterase 4D...	no	no	no	no
ENSG00000178235	58.765	-4.364	1.002	-4.355	1.3e-05	0.00017	down	13	SLITRK1	83877205	83882474	SLIT and NTRK like f...	no	no	no	no
ENSG00000178531	74.196	0.784	0.222	3.532	0.00041	0.004	up	19	CTXN1	7924491	7926135	cortexin 1 [Source:H...	no	no	no	no
ENSG00000178685	950.386	-0.581	0.176	-3.302	0.00096	0.007	down	8	PARP10	143977153	144012772	poly(ADP-ribose) pol...	no	no	no	no
ENSG00000178695	1693.24	-1.213	0.34	-3.566	0.00036	0.003	down	13	KCTD12	76880175	76886405	potassium channel te...	no	no	no	no
ENSG00000178718	338.338	-1.663	0.236	-7.052	1.8e-12	9.3e-11	down	15	RPP25	74954418	74956772	ribonuclease P and M...	no	no	no	no
ENSG00000178726	723.486	-1.069	0.364	-2.938	0.003	0.02	down	20	THBD	23045633	23049672	thrombomodulin [Sour...	no	no	no	no
ENSG00000178734	36.989	-2.727	0.622	-4.382	1.2e-05	0.00016	down	13	LMO7DN	75871038	75883811	LMO7 downstream neig...	no	no	no	no
ENSG00000178773	929.5	-3.753	0.358	-10.491	9.5e-26	2.6e-23	down	16	CPNE7	89575758	89597246	copine 7 [Source:HGN...	no	no	no	no
ENSG00000178878	241.855	1.143	0.228	5.007	5.5e-07	1e-05	up	12	APOLD1	12725917	12829975	apolipoprotein L dom...	no	no	no	no
ENSG00000178882	403.702	-1.247	0.252	-4.951	7.4e-07	1.3e-05	down	12	RFLNA	123973241	124316024	refilin A [Source:HG...	no	no	no	no
ENSG00000179348	1301.02	1.087	0.245	4.444	8.8e-06	0.00012	up	3	GATA2	128479427	128493201	GATA binding protein...	no	no	no	no
ENSG00000179403	144.941	0.751	0.175	4.28	1.9e-05	0.00023	up	1	VWA1	1434861	1442882	von Willebrand facto...	no	no	no	no
ENSG00000179832	1578.07	-0.59	0.193	-3.047	0.002	0.015	down	8	MROH1	144148016	144261927	maestro heat like re...	no	no	no	no
ENSG00000179909	658.624	1.096	0.23	4.761	1.9e-06	3.1e-05	up	19	ZNF154	57696275	57709204	zinc finger protein ...	no	no	no	no
ENSG00000179954	4922.17	0.917	0.309	2.969	0.003	0.018	up	19	SSC5D	55488404	55519099	scavenger receptor c...	no	no	no	no
ENSG00000179981	1480.79	0.607	0.228	2.667	0.008	0.039	up	18	TSHZ1	75210755	75289950	teashirt zinc finger...	no	no	no	no
ENSG00000180190	209.768	1.118	0.219	5.094	3.5e-07	6.8e-06	up	8	TDRP	489803	545781	testis development r...	no	no	no	no
ENSG00000180229	579.226	0.82	0.254	3.233	0.001	0.009	up	15	HERC2P3	20431093	20505462	HERC2 pseudogene 3 [...	no	no	no	no
ENSG00000180233	187.826	-0.695	0.14	-4.972	6.6e-07	1.2e-05	down	7	ZNRF2	30284597	30367689	zinc and ring finger...	no	no	no	no
ENSG00000180257	149.875	-0.631	0.168	-3.756	0.00017	0.002	down	19	ZNF816	52949379	52962911	zinc finger protein ...	no	no	no	no
ENSG00000180537	386.385	0.947	0.143	6.613	3.8e-11	1.6e-09	up	6	RNF182	13924446	13980310	ring finger protein ...	no	no	no	no
ENSG00000180628	3688.23	-0.61	0.144	-4.236	2.3e-05	0.00027	down	10	PCGF5	91163012	91284337	polycomb group ring ...	no	no	no	no
ENSG00000180660	159.994	1.663	0.351	4.731	2.2e-06	3.6e-05	up	13	MAB21L1	35473419	35478764	mab-21 like 1 [Sourc...	no	no	no	no
ENSG00000180730	74.373	4.764	0.933	5.106	3.3e-07	6.4e-06	up	13	SHISA2	26044597	26052016	shisa family member ...	no	no	no	no
ENSG00000180739	45.969	-2.985	0.408	-7.319	2.5e-13	1.5e-11	down	19	S1PR5	10512742	10517931	sphingosine-1-phosph...	no	no	no	no
ENSG00000180777	34.595	5.483	1.067	5.141	2.7e-07	5.5e-06	up	18	ANKRD30B	14728272	14854667	ankyrin repeat domai...	no	no	no	no
ENSG00000180801	4169.95	1.069	0.225	4.752	2e-06	3.3e-05	up	4	ARSJ	113900284	113979727	arylsulfatase family...	no	no	no	no
ENSG00000180818	246.355	4.911	1.017	4.827	1.4e-06	2.3e-05	up	12	HOXC10	53985065	53990279	homeobox C10 [Source...	no	no	no	no
ENSG00000180914	13683.8	-1.819	0.159	-11.459	2.1e-30	8e-28	down	3	OXTR	8750381	8769628	oxytocin receptor [S...	no	no	no	no
ENSG00000181019	8027.65	-1.062	0.098	-10.825	2.6e-27	8.1e-25	down	16	NQO1	69706996	69726668	NAD(P)H quinone dehy...	no	no	no	no
ENSG00000181031	76.199	-1.612	0.183	-8.833	1e-18	1.3e-16	down	17	RPH3AL	212389	386254	rabphilin 3A like (w...	no	no	no	no
ENSG00000181072	1767.46	3.664	1.205	3.04	0.002	0.015	up	7	CHRM2	136868652	137020255	cholinergic receptor...	no	no	no	no
ENSG00000181104	4257.75	-0.582	0.213	-2.729	0.006	0.033	down	5	F2R	76716126	76735770	coagulation factor I...	no	no	no	no
ENSG00000181195	156.053	-0.848	0.192	-4.411	1e-05	0.00014	down	8	PENK	56436674	56446671	proenkephalin [Sourc...	no	no	no	no
ENSG00000181381	1334.35	0.606	0.113	5.352	8.7e-08	1.9e-06	up	4	DDX60L	168356735	168537786	DExD/H-box 60 like [...	no	no	no	no
ENSG00000181404	205.32	-0.654	0.203	-3.224	0.001	0.009	down	9	WASHC1	14475	73865	WASH complex subunit...	no	no	no	no
ENSG00000181690	551.323	1.127	0.223	5.049	4.4e-07	8.4e-06	up	8	PLAG1	56160909	56211324	PLAG1 zinc finger [S...	no	no	no	no
ENSG00000181744	512.856	0.723	0.225	3.213	0.001	0.009	up	3	DIPK2A	143971823	144048719	divergent protein ki...	no	no	no	no
ENSG00000181751	1448.05	-0.857	0.226	-3.788	0.00015	0.001	down	5	MACIR	103258763	103278660	macrophage immunomet...	no	no	no	no
ENSG00000182022	114.31	4.109	0.583	7.043	1.9e-12	9.8e-11	up	10	CHST15	124007668	124093598	carbohydrate sulfotr...	no	no	no	no
ENSG00000182107	50.42	-2.351	0.345	-6.805	1e-11	4.7e-10	down	14	TMEM30B	61277370	61281761	transmembrane protei...	no	no	no	no
ENSG00000182118	68.717	1.389	0.322	4.32	1.6e-05	0.0002	up	1	FAM89A	231018958	231040254	family with sequence...	no	no	no	no
ENSG00000182261	101.178	-1.253	0.402	-3.119	0.002	0.012	down	11	NLRP10	7957537	7965447	NLR family pyrin dom...	no	no	no	no
ENSG00000182263	252.884	-1.103	0.236	-4.678	2.9e-06	4.5e-05	down	2	FIGN	163593396	163736012	fidgetin, microtubul...	no	no	no	no
ENSG00000182272	161.445	2.733	0.359	7.615	2.6e-14	1.8e-12	up	11	B4GALNT4	369499	382117	beta-1,4-N-acetyl-ga...	no	no	no	no
ENSG00000182379	216.329	0.747	0.141	5.309	1.1e-07	2.3e-06	up	12	NXPH4	57216794	57226449	neurexophilin 4 [Sou...	no	no	no	no
ENSG00000182511	440.274	-0.996	0.139	-7.171	7.4e-13	4.1e-11	down	15	FES	90883695	90895776	FES proto-oncogene, ...	no	no	no	no
ENSG00000182575	82.092	-2.096	0.27	-7.754	8.9e-15	6.3e-13	down	17	NXPH3	49575871	49583827	neurexophilin 3 [Sou...	no	no	no	no
ENSG00000182612	458.258	-1.931	0.273	-7.083	1.4e-12	7.5e-11	down	17	TSPAN10	81637171	81648754	tetraspanin 10 [Sour...	no	no	no	no
ENSG00000182636	1533.09	1.57	0.264	5.95	2.7e-09	8e-08	up	15	NDN	23685400	23687305	necdin, MAGE family ...	no	no	no	no
ENSG00000182667	1576.2	1.303	0.15	8.669	4.3e-18	4.9e-16	up	11	NTM	131370478	132336822	neurotrimin [Source:...	no	no	no	no
ENSG00000182752	4475.48	1.126	0.171	6.568	5.1e-11	2.1e-09	up	9	PAPPA	116153791	116402321	pappalysin 1 [Source...	no	no	no	no
ENSG00000182871	3458.77	2.541	0.285	8.927	4.4e-19	5.8e-17	up	21	COL18A1	45405165	45513720	collagen type XVIII ...	no	no	no	no
ENSG00000182916	378.137	1.115	0.169	6.589	4.4e-11	1.9e-09	up	X	TCEAL7	103330229	103332326	transcription elonga...	no	no	no	yes
ENSG00000182983	298.856	0.595	0.153	3.89	0.0001	0.001	up	3	ZNF662	42906142	42919334	zinc finger protein ...	no	no	no	no
ENSG00000182985	644.731	1.967	0.35	5.622	1.9e-08	4.7e-07	up	11	CADM1	115169218	115504957	cell adhesion molecu...	no	no	no	no
ENSG00000183049	148.437	0.92	0.259	3.548	0.00039	0.003	up	10	CAMK1D	12349547	12835545	calcium/calmodulin d...	no	no	no	no
ENSG00000183160	14275.9	-0.847	0.18	-4.7	2.6e-06	4.1e-05	down	12	TMEM119	108589851	108598320	transmembrane protei...	no	no	no	no
ENSG00000183250	244.964	-0.798	0.188	-4.251	2.1e-05	0.00026	down	21	LINC01547	44932814	44939941	long intergenic non-...	no	no	no	no
ENSG00000183439	140.613	1.999	0.213	9.404	5.3e-21	8.9e-19	up	4	TRIM61	164954446	164977668	tripartite motif con...	no	no	no	no
ENSG00000183458	473.953	-0.609	0.238	-2.557	0.011	0.05	down	16	PKD1P3	14911551	14935708	polycystin 1, transi...	no	no	no	no
ENSG00000183486	634.939	1.674	0.387	4.33	1.5e-05	0.00019	up	21	MX2	41361999	41409393	MX dynamin like GTPa...	no	no	no	no
ENSG00000183496	1700.28	0.776	0.224	3.469	0.00052	0.004	up	15	MEX3B	82041778	82046119	mex-3 RNA binding fa...	no	no	no	no
ENSG00000183570	89.267	2.913	0.59	4.935	8e-07	1.4e-05	up	21	PCBP3	45643694	45942454	poly(rC) binding pro...	no	no	no	no
ENSG00000183597	761.094	-0.747	0.195	-3.827	0.00013	0.001	down	22	TANGO2	20017014	20067164	transport and golgi ...	no	no	no	no
ENSG00000183668	54.932	1.062	0.353	3.01	0.003	0.016	up	19	PSG9	43211791	43269530	pregnancy specific b...	no	no	no	no
ENSG00000183688	2593.6	0.695	0.158	4.387	1.1e-05	0.00015	up	17	RFLNB	439978	445939	refilin B [Source:HG...	no	no	no	no
ENSG00000183715	388.602	1.429	0.254	5.632	1.8e-08	4.5e-07	up	11	OPCML	132414977	133532501	opioid binding prote...	no	no	no	no
ENSG00000183770	365.456	1.255	0.154	8.159	3.4e-16	2.9e-14	up	3	FOXL2	138944224	138947137	forkhead box L2 [Sou...	no	no	no	no
ENSG00000183778	184.38	1.082	0.25	4.334	1.5e-05	0.00019	up	21	B3GALT5	39556442	39673137	beta-1,3-galactosylt...	no	no	no	no
ENSG00000183801	800.948	-1.147	0.237	-4.833	1.3e-06	2.3e-05	down	11	OLFML1	7485388	7511377	olfactomedin like 1 ...	no	no	no	no
ENSG00000183828	90.788	-0.818	0.285	-2.874	0.004	0.023	down	14	NUDT14	105172938	105181323	nudix hydrolase 14 [...	no	no	no	no
ENSG00000183876	1019.39	0.856	0.177	4.843	1.3e-06	2.2e-05	up	5	ARSI	150296343	150339307	arylsulfatase family...	no	no	no	no
ENSG00000183878	991.84	1.173	0.124	9.461	3.1e-21	5.6e-19	up	Y	UTY	13234577	13480673	ubiquitously transcr...	no	no	no	no
ENSG00000183889	72.315	1.431	0.262	5.459	4.8e-08	1.1e-06	up	16	ENSG00000183889	16317444	16350590	nuclear pore complex...	no	no	no	no
ENSG00000184058	135.072	2.072	0.555	3.735	0.00019	0.002	up	22	TBX1	19756703	19783593	T-box transcription ...	no	no	no	no
ENSG00000184156	137.295	1.635	0.275	5.936	2.9e-09	8.7e-08	up	8	KCNQ3	132120859	132481095	potassium voltage-ga...	no	no	no	no
ENSG00000184160	436.765	-3.091	0.322	-9.596	8.3e-22	1.6e-19	down	4	ADRA2C	3766348	3768526	adrenoceptor alpha 2...	no	no	no	no
ENSG00000184194	602.161	0.851	0.222	3.831	0.00013	0.001	up	X	GPR173	53048789	53080615	G protein-coupled re...	no	no	no	yes
ENSG00000184220	651.802	-0.634	0.212	-2.989	0.003	0.017	down	3	CMSS1	99817837	100181732	cms1 ribosomal small...	no	no	no	no
ENSG00000184227	211.898	-1.1	0.191	-5.746	9.1e-09	2.4e-07	down	14	ACOT1	73537143	73543796	acyl-CoA thioesteras...	no	no	no	no
ENSG00000184304	2314.06	-0.822	0.122	-6.721	1.8e-11	8.1e-10	down	14	PRKD1	29576479	30191898	protein kinase D1 [S...	no	no	no	no
ENSG00000184347	12713.2	-0.868	0.247	-3.509	0.00045	0.004	down	5	SLIT3	168661733	169301139	slit guidance ligand...	no	no	no	no
ENSG00000184349	95.6	1.456	0.353	4.13	3.6e-05	0.00042	up	5	EFNA5	107376894	107670937	ephrin A5 [Source:HG...	no	no	no	no
ENSG00000184363	62.09	1.131	0.271	4.178	2.9e-05	0.00034	up	11	PKP3	392614	404908	plakophilin 3 [Sourc...	no	no	no	no
ENSG00000184371	5356.32	-0.844	0.188	-4.499	6.8e-06	9.6e-05	down	1	CSF1	109910242	109930992	colony stimulating f...	no	no	no	no
ENSG00000184441	55.178	0.655	0.197	3.323	0.00089	0.007	up	21	ENSG00000184441	44331234	44335851	novel transcript, an...	no	no	no	no
ENSG00000184489	52.25	-0.949	0.252	-3.767	0.00017	0.002	down	8	PTP4A3	141391995	141432454	protein tyrosine pho...	no	no	no	no
ENSG00000184497	345.33	-0.594	0.216	-2.751	0.006	0.032	down	13	TMEM255B	113759226	113816995	transmembrane protei...	no	no	no	no
ENSG00000184545	75.519	2.433	0.56	4.344	1.4e-05	0.00018	up	11	DUSP8	1554051	1572271	dual specificity pho...	no	no	no	no
ENSG00000184557	1493.69	1.059	0.162	6.556	5.5e-11	2.3e-09	up	17	SOCS3	78356778	78360077	suppressor of cytoki...	no	no	no	no
ENSG00000184584	3343.07	-0.596	0.099	-6.013	1.8e-09	5.6e-08	down	5	STING1	139475533	139482935	stimulator of interf...	no	no	no	no
ENSG00000184809	108.11	1.47	0.306	4.803	1.6e-06	2.6e-05	up	21	B3GALT5-AS1	39597147	39612910	B3GALT5 antisense RN...	no	no	no	no
ENSG00000184979	192.563	1.069	0.381	2.805	0.005	0.028	up	22	USP18	18150118	18177397	ubiquitin specific p...	no	no	no	no
ENSG00000184985	689.151	-1.094	0.216	-5.057	4.3e-07	8.1e-06	down	4	SORCS2	7192538	7742836	sortilin related VPS...	no	no	no	no
ENSG00000184992	391.891	-1.187	0.196	-6.046	1.5e-09	4.6e-08	down	12	BRI3BP	124993645	125031231	BRI3 binding protein...	no	no	no	no
ENSG00000185010	283.359	-1.284	0.201	-6.386	1.7e-10	6.5e-09	down	X	F8	154835788	155026940	coagulation factor V...	no	no	no	yes
ENSG00000185022	868.42	1.179	0.13	9.09	9.9e-20	1.4e-17	up	22	MAFF	38200767	38216507	MAF bZIP transcripti...	no	no	no	no
ENSG00000185033	471.927	0.851	0.144	5.903	3.6e-09	1e-07	up	15	SEMA4B	90160604	90229679	semaphorin 4B [Sourc...	no	no	no	no
ENSG00000185070	3010.16	-0.965	0.093	-10.432	1.8e-25	4.6e-23	down	14	FLRT2	85530144	85654428	fibronectin leucine ...	no	no	no	no
ENSG00000185112	932.373	-1.053	0.269	-3.915	9.1e-05	0.00094	down	3	FAM43A	194685883	194689037	family with sequence...	no	no	no	no
ENSG00000185215	1426.82	-0.964	0.235	-4.1	4.1e-05	0.00047	down	14	TNFAIP2	103121476	103137439	TNF alpha induced pr...	no	no	no	no
ENSG00000185306	30.483	-1.481	0.515	-2.878	0.004	0.023	down	12	C12orf56	64264762	64390758	chromosome 12 open r...	no	no	no	no
ENSG00000185338	73.65	1.584	0.26	6.087	1.2e-09	3.7e-08	up	16	SOCS1	11254417	11256204	suppressor of cytoki...	no	no	no	no
ENSG00000185339	252.325	-0.814	0.185	-4.408	1e-05	0.00014	down	22	TCN2	30607003	30627271	transcobalamin 2 [So...	no	no	no	no
ENSG00000185482	69.666	0.635	0.247	2.569	0.01	0.048	up	12	STAC3	57243453	57251188	SH3 and cysteine ric...	no	no	no	no
ENSG00000185483	1339.51	-1.257	0.23	-5.467	4.6e-08	1.1e-06	down	1	ROR1	63774017	64181498	receptor tyrosine ki...	no	no	no	no
ENSG00000185499	670.094	0.824	0.25	3.3	0.00097	0.007	up	1	MUC1	155185824	155192916	mucin 1, cell surfac...	no	no	no	no
ENSG00000185507	278.015	1.535	0.312	4.912	9e-07	1.6e-05	up	11	IRF7	612553	615983	interferon regulator...	no	no	no	no
ENSG00000185513	131.21	0.794	0.286	2.776	0.006	0.03	up	20	L3MBTL1	43489442	43550954	L3MBTL histone methy...	no	no	no	no
ENSG00000185559	140.95	8.605	1.78	4.836	1.3e-06	2.3e-05	up	14	DLK1	100725705	100738224	delta like non-canon...	no	no	no	no
ENSG00000185561	234.477	-0.713	0.248	-2.876	0.004	0.023	down	17	TLCD2	1702816	1710377	TLC domain containin...	no	no	no	no
ENSG00000185565	480.305	-1.195	0.261	-4.581	4.6e-06	6.9e-05	down	3	LSAMP	115802363	117139389	limbic system associ...	no	no	no	no
ENSG00000185567	10407.5	-0.652	0.23	-2.836	0.005	0.025	down	14	AHNAK2	104937244	104978374	AHNAK nucleoprotein ...	no	no	no	no
ENSG00000185614	145.732	-0.942	0.188	-4.998	5.8e-07	1.1e-05	down	3	INKA1	49803261	49805030	inka box actin regul...	no	no	no	no
ENSG00000185634	174.674	2.996	0.447	6.697	2.1e-11	9.3e-10	up	15	SHC4	48823741	48963919	SHC adaptor protein ...	no	no	no	no
ENSG00000185652	581.939	0.783	0.195	4.011	6e-05	0.00066	up	12	NTF3	5432108	5521536	neurotrophin 3 [Sour...	no	no	no	no
ENSG00000185745	1168.43	2.22	0.457	4.86	1.2e-06	2e-05	up	10	IFIT1	89392546	89406487	interferon induced p...	no	no	no	no
ENSG00000185813	1265.94	-0.847	0.131	-6.438	1.2e-10	4.7e-09	down	17	PCYT2	81900958	81911432	phosphate cytidylylt...	no	no	no	no
ENSG00000185880	440.218	0.722	0.245	2.942	0.003	0.019	up	15	TRIM69	44728988	44767829	tripartite motif con...	no	no	no	no
ENSG00000185885	793.466	1.888	0.253	7.464	8.4e-14	5.3e-12	up	11	IFITM1	310041	315272	interferon induced t...	no	no	no	no
ENSG00000185904	195.98	4.919	0.401	12.259	1.5e-34	7.4e-32	up	10	LINC00839	42475480	42495337	long intergenic non-...	no	no	no	no
ENSG00000185920	391.859	-0.831	0.178	-4.68	2.9e-06	4.5e-05	down	9	PTCH1	95442980	95517057	patched 1 [Source:HG...	no	no	no	no
ENSG00000185960	78.168	23.913	2.138	11.184	4.9e-29	1.7e-26	up	X	SHOX	624344	659411	short stature homeob...	PAR1	no	no	no
ENSG00000186283	1279	-0.63	0.141	-4.487	7.2e-06	0.0001	down	1	TOR3A	179082070	179098023	torsin family 3 memb...	no	no	no	no
ENSG00000186297	143.735	2.337	0.77	3.035	0.002	0.015	up	15	GABRA5	26866911	26949208	gamma-aminobutyric a...	no	no	no	no
ENSG00000186301	73.137	0.763	0.292	2.611	0.009	0.044	up	1	MST1P2	16645622	16650289	macrophage stimulati...	no	no	no	no
ENSG00000186352	127.069	1.315	0.238	5.525	3.3e-08	7.8e-07	up	4	ANKRD37	185396021	185400628	ankyrin repeat domai...	no	no	no	no
ENSG00000186481	22.889	7.564	1.166	6.487	8.8e-11	3.5e-09	up	18	ANKRD20A5P	14179395	14244811	ankyrin repeat domai...	no	no	no	no
ENSG00000186567	247.33	0.719	0.24	3	0.003	0.017	up	19	CEACAM19	44662278	44684359	CEA cell adhesion mo...	no	no	no	no
ENSG00000186684	390.518	1.078	0.295	3.65	0.00026	0.002	up	2	CYP27C1	127183832	127220313	cytochrome P450 fami...	no	no	no	no
ENSG00000186918	2021.8	0.853	0.258	3.302	0.00096	0.007	up	8	ZNF395	28345590	28402701	zinc finger protein ...	no	no	no	no
ENSG00000187068	175.064	1.345	0.37	3.634	0.00028	0.003	up	3	C3orf70	185076838	185153060	chromosome 3 open re...	no	no	no	no
ENSG00000187123	420.925	-1.263	0.238	-5.298	1.2e-07	2.5e-06	down	2	LYPD6	149329985	149474138	LY6/PLAUR domain con...	no	no	no	no
ENSG00000187151	29.162	-5.807	0.718	-8.085	6.2e-16	5e-14	down	11	ANGPTL5	101890674	101916522	angiopoietin like 5 ...	no	no	no	no
ENSG00000187193	80.696	1.358	0.224	6.051	1.4e-09	4.5e-08	up	16	MT1X	56682470	56684196	metallothionein 1X [...	no	no	no	no
ENSG00000187210	936.95	-1.788	0.141	-12.714	4.9e-37	2.6e-34	down	9	GCNT1	76419850	76651203	glucosaminyl (N-acet...	no	no	no	no
ENSG00000187323	96.078	3.976	1.347	2.952	0.003	0.019	up	18	DCC	52340197	53535903	DCC netrin 1 recepto...	no	no	no	no
ENSG00000187391	407.693	-1.264	0.175	-7.213	5.5e-13	3e-11	down	7	MAGI2	78017055	79453667	membrane associated ...	no	no	no	no
ENSG00000187398	61.557	5.581	1.484	3.761	0.00017	0.002	up	11	LUZP2	24496970	25082638	leucine zipper prote...	no	no	no	no
ENSG00000187498	73318.2	1.464	0.55	2.661	0.008	0.039	up	13	COL4A1	110148963	110307157	collagen type IV alp...	no	no	no	no
ENSG00000187522	452.702	-0.6	0.187	-3.213	0.001	0.009	down	10	HSPA14	14838306	14871741	heat shock protein f...	no	no	no	no
ENSG00000187583	136.067	-0.621	0.221	-2.812	0.005	0.027	down	1	PLEKHN1	966482	975865	pleckstrin homology ...	no	no	no	no
ENSG00000187605	618.302	1.976	0.337	5.864	4.5e-09	1.3e-07	up	2	TET3	73984910	74108176	tet methylcytosine d...	no	no	no	no
ENSG00000187608	1486.35	2.086	0.425	4.911	9.1e-07	1.6e-05	up	1	ISG15	1001138	1014540	ISG15 ubiquitin like...	no	no	no	no
ENSG00000187650	191.57	0.643	0.209	3.077	0.002	0.014	up	19	VMAC	5904872	5910853	vimentin type interm...	no	no	no	no
ENSG00000187688	1871.27	-0.873	0.185	-4.717	2.4e-06	3.8e-05	down	17	TRPV2	16415571	16437003	transient receptor p...	no	no	no	no
ENSG00000187699	218.471	-2.925	0.363	-8.062	7.5e-16	6e-14	down	2	C2orf88	189879609	190203484	chromosome 2 open re...	no	no	no	no
ENSG00000187800	2384.3	2.029	0.326	6.218	5e-10	1.7e-08	up	1	PEAR1	156893698	156916429	platelet endothelial...	no	no	no	no
ENSG00000187942	116.855	-0.726	0.28	-2.595	0.009	0.046	down	1	LDLRAD2	21812265	21825225	low density lipoprot...	no	no	no	no
ENSG00000187961	1014.08	-0.73	0.203	-3.593	0.00033	0.003	down	1	KLHL17	960584	965719	kelch like family me...	no	no	no	no
ENSG00000188060	201.783	0.631	0.202	3.118	0.002	0.012	up	1	RAB42	28592200	28595449	RAB42, member RAS on...	no	no	no	no
ENSG00000188064	62.819	2.933	0.955	3.07	0.002	0.014	up	22	WNT7B	45920366	45977162	Wnt family member 7B...	no	no	no	no
ENSG00000188153	917.306	2.041	0.374	5.451	5e-08	1.1e-06	up	X	COL4A5	108439838	108697545	collagen type IV alp...	no	no	no	yes
ENSG00000188157	4011.66	1.078	0.204	5.278	1.3e-07	2.7e-06	up	1	AGRN	1020120	1056118	agrin [Source:HGNC S...	no	no	no	no
ENSG00000188211	400.678	-1.046	0.192	-5.458	4.8e-08	1.1e-06	down	11	NCR3LG1	17351800	17377341	natural killer cell ...	no	no	no	no
ENSG00000188290	208.705	2.003	0.654	3.061	0.002	0.014	up	1	HES4	998962	1000172	hes family bHLH tran...	no	no	no	no
ENSG00000188313	989.623	0.688	0.203	3.38	0.00073	0.006	up	3	PLSCR1	146515180	146544856	phospholipid scrambl...	no	no	no	no
ENSG00000188321	400.331	0.598	0.099	6.032	1.6e-09	5e-08	up	19	ZNF559	9323772	9351162	zinc finger protein ...	no	no	no	no
ENSG00000188385	44.921	-0.859	0.293	-2.933	0.003	0.02	down	10	JAKMIP3	132036336	132184858	Janus kinase and mic...	no	no	no	no
ENSG00000188501	140.395	0.796	0.305	2.611	0.009	0.044	up	15	LCTL	66547179	66565998	lactase like [Source...	no	no	no	no
ENSG00000188522	1912.13	-0.905	0.242	-3.743	0.00018	0.002	down	17	FAM83G	18968789	19004764	family with sequence...	no	no	no	no
ENSG00000188581	91.882	-4.69	0.633	-7.404	1.3e-13	8.1e-12	down	17	KRTAP1-1	41040541	41041450	keratin associated p...	no	no	no	no
ENSG00000188641	1876.66	-0.65	0.195	-3.34	0.00084	0.006	down	1	DPYD	97077743	97995000	dihydropyrimidine de...	no	no	no	no
ENSG00000188677	1586.88	0.582	0.182	3.195	0.001	0.01	up	22	PARVB	43999211	44172939	parvin beta [Source:...	no	no	no	no
ENSG00000188783	767.753	-1.116	0.302	-3.691	0.00022	0.002	down	1	PRELP	203475806	203491352	proline and arginine...	no	no	no	no
ENSG00000188921	991.239	-0.606	0.157	-3.85	0.00012	0.001	down	9	HACD4	20999509	21031640	3-hydroxyacyl-CoA de...	no	no	no	no
ENSG00000188931	60.068	-0.677	0.167	-4.043	5.3e-05	0.00059	down	1	CFAP126	161364733	161367876	cilia and flagella a...	no	no	no	no
ENSG00000188933	133.503	-1.611	0.521	-3.095	0.002	0.013	down	17	USP32P1	16796043	16802427	ubiquitin specific p...	no	no	no	no
ENSG00000189001	218.512	1.112	0.293	3.799	0.00015	0.001	up	19	SBSN	35523367	35528351	suprabasin [Source:H...	no	no	no	no
ENSG00000189056	202.738	-5.999	0.617	-9.715	2.6e-22	5.1e-20	down	7	RELN	103471381	103989658	reelin [Source:HGNC ...	no	no	no	no
ENSG00000189057	363.219	-0.939	0.22	-4.277	1.9e-05	0.00023	down	11	FAM111B	59107185	59127412	FAM111 trypsin like ...	no	no	no	no
ENSG00000189060	6908.15	0.614	0.141	4.351	1.4e-05	0.00018	up	22	H1-0	37805229	37807432	H1.0 linker histone ...	no	no	no	no
ENSG00000189067	1381.36	0.625	0.227	2.757	0.006	0.031	up	16	LITAF	11547722	11636381	lipopolysaccharide i...	no	no	no	no
ENSG00000189129	910.801	-0.829	0.199	-4.164	3.1e-05	0.00036	down	10	PLAC9	80131682	80145359	placenta associated ...	no	no	no	no
ENSG00000189223	805.298	5.074	0.213	23.801	3.3e-125	4.3e-121	up	2	PAX8-AS1	113211421	113276581	PAX8 antisense RNA 1...	no	no	no	no
ENSG00000189320	2674.89	-2.385	0.305	-7.822	5.2e-15	3.7e-13	down	7	FAM180A	135728348	135748813	family with sequence...	no	no	no	no
ENSG00000189337	1140.22	-0.717	0.181	-3.954	7.7e-05	0.00082	down	1	KAZN	13892792	15118043	kazrin, periplakin i...	no	no	no	no
ENSG00000196152	229.448	-0.834	0.181	-4.603	4.2e-06	6.3e-05	down	9	ZNF79	127424374	127445372	zinc finger protein ...	no	no	no	no
ENSG00000196196	54.775	-1.54	0.255	-6.049	1.5e-09	4.6e-08	down	9	HRCT1	35906202	35907136	histidine rich carbo...	no	no	no	no
ENSG00000196466	74.162	-0.628	0.234	-2.68	0.007	0.038	down	19	ZNF799	12390016	12401271	zinc finger protein ...	no	no	no	no
ENSG00000196544	136.326	-0.595	0.228	-2.614	0.009	0.044	down	17	BORCS6	8188345	8190180	BLOC-1 related compl...	no	no	no	no
ENSG00000196557	38.131	8.302	1.622	5.119	3.1e-07	6.1e-06	up	16	CACNA1H	1153106	1221771	calcium voltage-gate...	no	no	no	no
ENSG00000196562	1599.29	-0.964	0.272	-3.549	0.00039	0.003	down	20	SULF2	47656197	47786616	sulfatase 2 [Source:...	no	no	no	no
ENSG00000196569	4283.92	-1.199	0.141	-8.535	1.4e-17	1.5e-15	down	6	LAMA2	128883138	129516566	laminin subunit alph...	no	no	no	no
ENSG00000196581	27.085	4.221	0.761	5.549	2.9e-08	6.9e-07	up	1	AJAP1	4654609	4792534	adherens junctions a...	no	no	no	no
ENSG00000196632	72.008	2.337	0.351	6.65	2.9e-11	1.3e-09	up	X	WNK3	54192823	54358642	WNK lysine deficient...	no	no	no	yes
ENSG00000196754	146.353	0.6	0.141	4.252	2.1e-05	0.00026	up	1	S100A2	153561108	153567890	S100 calcium binding...	no	no	no	no
ENSG00000196878	577.217	0.925	0.217	4.255	2.1e-05	0.00026	up	1	LAMB3	209614870	209652425	laminin subunit beta...	no	no	no	no
ENSG00000196937	3347.09	-0.724	0.213	-3.401	0.00067	0.005	down	7	FAM3C	121348878	121396364	FAM3 metabolism regu...	no	no	no	no
ENSG00000197077	170.301	-2.56	0.309	-8.286	1.2e-16	1.1e-14	down	22	KIAA1671	24952716	25197448	KIAA1671 [Source:HGN...	no	no	no	no
ENSG00000197081	10825.6	-0.604	0.206	-2.936	0.003	0.02	down	6	IGF2R	159969082	160113507	insulin like growth ...	no	no	no	no
ENSG00000197093	828.303	-0.615	0.159	-3.878	0.00011	0.001	down	7	GAL3ST4	100159244	100168617	galactose-3-O-sulfot...	no	no	no	no
ENSG00000197106	65.902	-1.123	0.409	-2.745	0.006	0.032	down	1	SLC6A17	110150494	110202202	solute carrier famil...	no	no	no	no
ENSG00000197140	73.976	-0.692	0.207	-3.347	0.00082	0.006	down	8	ADAM32	39106990	39284917	ADAM metallopeptidas...	no	no	no	no
ENSG00000197301	57.903	-0.828	0.319	-2.593	0.01	0.046	down	12	HMGA2-AS1	65851340	65882167	HMGA2 antisense RNA ...	no	no	no	no
ENSG00000197321	1008.57	1.377	0.202	6.801	1e-11	4.8e-10	up	10	SVIL	29457338	29736959	supervillin [Source:...	no	no	no	no
ENSG00000197355	3042.35	-0.861	0.192	-4.488	7.2e-06	0.0001	down	9	UAP1L1	137077517	137084539	UDP-N-acetylglucosam...	no	no	no	no
ENSG00000197375	169.243	1.094	0.267	4.097	4.2e-05	0.00047	up	5	SLC22A5	132369710	132395613	solute carrier famil...	no	no	no	no
ENSG00000197381	3049.77	-1.322	0.177	-7.454	9.1e-14	5.7e-12	down	21	ADARB1	45073853	45226560	adenosine deaminase ...	no	no	no	no
ENSG00000197405	82.261	-1.392	0.268	-5.199	2e-07	4.1e-06	down	19	C5AR1	47290023	47322066	complement C5a recep...	no	no	no	no
ENSG00000197457	469.361	1.382	0.471	2.933	0.003	0.02	up	20	STMN3	63639705	63657682	stathmin 3 [Source:H...	no	no	no	no
ENSG00000197465	104.112	-1.417	0.191	-7.405	1.3e-13	8.1e-12	down	4	GYPE	143870864	143905563	glycophorin E (MNS b...	no	no	no	no
ENSG00000197614	14644.4	-1.059	0.157	-6.747	1.5e-11	6.9e-10	down	12	MFAP5	8637346	8662888	microfibril associat...	no	no	no	no
ENSG00000197632	124.495	-1.45	0.416	-3.484	0.00049	0.004	down	18	SERPINB2	63871692	63903888	serpin family B memb...	no	no	no	no
ENSG00000197653	301.525	1.232	0.332	3.706	0.00021	0.002	up	12	DNAH10	123762188	123935720	dynein axonemal heav...	no	no	no	no
ENSG00000197894	8496.7	-0.65	0.21	-3.094	0.002	0.013	down	4	ADH5	99070978	99088801	alcohol dehydrogenas...	no	no	no	no
ENSG00000197976	2681.16	0.588	0.162	3.628	0.00029	0.003	up	X	AKAP17A	1591604	1602520	A-kinase anchoring p...	PAR1	no	no	no
ENSG00000197977	159.589	1.237	0.361	3.427	0.00061	0.005	up	6	ELOVL2	10980759	11044305	ELOVL fatty acid elo...	no	no	no	no
ENSG00000197978	173.868	0.755	0.188	4.024	5.7e-05	0.00063	up	15	GOLGA6L9	82429816	82439153	golgin A6 family lik...	no	no	no	no
ENSG00000198039	142.392	-0.893	0.174	-5.126	3e-07	5.9e-06	down	7	ZNF273	64870172	64930981	zinc finger protein ...	no	no	no	no
ENSG00000198185	325.066	0.59	0.192	3.08	0.002	0.013	up	20	ZNF334	46499630	46513559	zinc finger protein ...	no	no	no	no
ENSG00000198355	687.305	0.682	0.204	3.34	0.00084	0.006	up	22	PIM3	49960768	49964072	Pim-3 proto-oncogene...	no	no	no	no
ENSG00000198417	42.674	2.824	0.655	4.309	1.6e-05	0.00021	up	16	MT1F	56657731	56660698	metallothionein 1F [...	no	no	no	no
ENSG00000198431	16382.5	-1.101	0.194	-5.682	1.3e-08	3.5e-07	down	12	TXNRD1	104215779	104350307	thioredoxin reductas...	no	no	no	no
ENSG00000198468	55.733	-1.095	0.237	-4.626	3.7e-06	5.7e-05	down	1	FLVCR1-DT	212852105	212858139	FLVCR1 divergent tra...	no	no	no	no
ENSG00000198542	11697.8	-1.116	0.189	-5.891	3.8e-09	1.1e-07	down	13	ITGBL1	101452593	101720856	integrin subunit bet...	no	no	no	no
ENSG00000198597	284.024	2.942	0.876	3.357	0.00079	0.006	up	19	ZNF536	30224891	30713586	zinc finger protein ...	no	no	no	no
ENSG00000198624	51.893	-0.862	0.23	-3.747	0.00018	0.002	down	5	CCDC69	151181052	151224093	coiled-coil domain c...	no	no	no	no
ENSG00000198673	81.107	2.779	0.474	5.864	4.5e-09	1.3e-07	up	12	TAFA2	61708273	62279150	TAFA chemokine like ...	no	no	no	no
ENSG00000198692	1166.22	0.985	0.144	6.843	7.8e-12	3.7e-10	up	Y	EIF1AY	20575776	20593154	eukaryotic translati...	no	no	no	no
ENSG00000198715	2591.82	-1.056	0.236	-4.468	7.9e-06	0.00011	down	1	GLMP	156290089	156295689	glycosylated lysosom...	no	no	no	no
ENSG00000198729	95.031	1.133	0.325	3.488	0.00049	0.004	up	6	PPP1R14C	150143044	150250392	protein phosphatase ...	no	no	no	no
ENSG00000198732	217.867	6.45	1.245	5.18	2.2e-07	4.5e-06	up	14	SMOC1	69854131	70032366	SPARC related modula...	no	no	no	no
ENSG00000198743	1964.47	0.681	0.182	3.744	0.00018	0.002	up	21	SLC5A3	34073578	34106260	solute carrier famil...	no	no	no	no
ENSG00000198753	954.854	1.584	0.195	8.146	3.8e-16	3.2e-14	up	X	PLXNB3	153764196	153779346	plexin B3 [Source:HG...	no	yes	no	no
ENSG00000198768	2170.12	-0.969	0.191	-5.071	3.9e-07	7.6e-06	down	20	APCDD1L	58459101	58515399	APC down-regulated 1...	no	no	no	no
ENSG00000198794	178.456	-1.209	0.375	-3.227	0.001	0.009	down	15	SCAMP5	74957219	75021495	secretory carrier me...	no	no	no	no
ENSG00000198795	961.319	1.196	0.348	3.437	0.00059	0.005	up	18	ZNF521	25061924	25352190	zinc finger protein ...	no	no	no	no
ENSG00000198807	28.663	-4.064	0.943	-4.311	1.6e-05	0.00021	down	14	PAX9	36657568	36679362	paired box 9 [Source...	no	no	no	no
ENSG00000198846	260.51	-1.462	0.265	-5.525	3.3e-08	7.8e-07	down	8	TOX	58805412	59119147	thymocyte selection ...	no	no	no	no
ENSG00000198947	371.565	-1.19	0.277	-4.298	1.7e-05	0.00022	down	X	DMD	31097677	33339609	dystrophin [Source:H...	no	no	no	yes
ENSG00000198959	1336.8	1.396	0.499	2.796	0.005	0.028	up	20	TGM2	38127385	38166578	transglutaminase 2 [...	no	no	no	no
ENSG00000202078	81.922	0.953	0.263	3.627	0.00029	0.003	up	1	ENSG00000202078	160326104	160326216	Y RNA [Source:RFAM;A...	no	no	no	no
ENSG00000203485	7409.08	-0.616	0.195	-3.162	0.002	0.011	down	14	INF2	104681146	104722535	inverted formin 2 [S...	no	no	no	no
ENSG00000203721	148.768	0.692	0.147	4.719	2.4e-06	3.8e-05	up	1	LINC00862	200253419	200400705	long intergenic non-...	no	no	no	no
ENSG00000203727	37.66	3.835	0.722	5.309	1.1e-07	2.3e-06	up	6	SAMD5	147508690	147737547	sterile alpha motif ...	no	no	no	no
ENSG00000204103	718.262	1.098	0.204	5.391	7e-08	1.5e-06	up	20	MAFB	40685848	40689236	MAF bZIP transcripti...	no	no	no	no
ENSG00000204131	1507.75	0.988	0.162	6.105	1e-09	3.3e-08	up	X	NHSL2	71910845	72161750	NHS like 2 [Source:H...	no	no	yes	no
ENSG00000204179	66.891	4.737	0.63	7.515	5.7e-14	3.7e-12	up	10	PTPN20	46911396	47002488	protein tyrosine pho...	no	no	no	no
ENSG00000204305	208.1	0.851	0.159	5.363	8.2e-08	1.8e-06	up	6	AGER	32180968	32184322	advanced glycosylati...	no	no	no	no
ENSG00000204386	1605.38	-0.635	0.179	-3.555	0.00038	0.003	down	6	NEU1	31857659	31862905	neuraminidase 1 [Sou...	no	no	no	no
ENSG00000204389	348.407	-0.59	0.195	-3.028	0.002	0.016	down	6	HSPA1A	31815543	31817946	heat shock protein f...	no	no	no	no
ENSG00000204397	56.575	1.985	0.43	4.61	4e-06	6.1e-05	up	11	CARD16	105041326	105101431	caspase recruitment ...	no	no	no	no
ENSG00000204442	219.438	-1.965	0.455	-4.32	1.6e-05	0.0002	down	13	NALF1	107163510	107867496	NALCN channel auxili...	no	no	no	no
ENSG00000204520	1407.27	0.856	0.136	6.284	3.3e-10	1.2e-08	up	6	MICA	31399784	31415315	MHC class I polypept...	no	no	no	no
ENSG00000204525	11133.6	0.692	0.155	4.459	8.2e-06	0.00011	up	6	HLA-C	31268749	31272130	major histocompatibi...	no	no	no	no
ENSG00000204580	2262.6	-0.638	0.247	-2.583	0.01	0.047	down	6	DDR1	30876421	30900156	discoidin domain rec...	no	no	no	no
ENSG00000204650	64.732	-0.777	0.266	-2.917	0.004	0.021	down	17	LINC02210	45620328	45655156	long intergenic non-...	no	no	no	no
ENSG00000204764	223.215	0.98	0.283	3.462	0.00054	0.004	up	5	RANBP17	170861870	171300015	RAN binding protein ...	no	no	no	no
ENSG00000205464	117.887	0.735	0.156	4.71	2.5e-06	3.9e-05	up	5	ATP6AP1L	82279462	82386977	ATPase H+ transporti...	no	no	no	no
ENSG00000205609	81.446	-0.845	0.239	-3.531	0.00041	0.004	down	16	EIF3CL	28379579	28403841	eukaryotic translati...	no	no	no	no
ENSG00000205746	252.324	-1.114	0.231	-4.828	1.4e-06	2.3e-05	down	16	PKD1P4	18334400	18352476	polycystin 1, transi...	no	no	no	no
ENSG00000205763	798.725	-0.648	0.21	-3.082	0.002	0.013	down	7	RP9P	32916815	32943038	RP9 pseudogene [Sour...	no	no	no	no
ENSG00000206262	556.033	1.448	0.172	8.409	4.1e-17	4.1e-15	up	3	FOXL2NB	138947217	138953990	FOXL2 neighbor [Sour...	no	no	no	no
ENSG00000206384	265.097	1.312	0.488	2.687	0.007	0.037	up	3	COL6A6	130517177	130677044	collagen type VI alp...	no	no	no	no
ENSG00000206527	2970.12	-1.13	0.108	-10.421	2e-25	4.9e-23	down	3	HACD2	123490820	123585053	3-hydroxyacyl-CoA de...	no	no	no	no
ENSG00000211445	313.183	-4.028	0.306	-13.17	1.3e-39	8.6e-37	down	5	GPX3	151020591	151028988	glutathione peroxida...	no	no	no	no
ENSG00000211455	2712.28	0.841	0.298	2.819	0.005	0.027	up	12	STK38L	27243968	27325959	serine/threonine kin...	no	no	no	no
ENSG00000211584	634.073	-0.807	0.202	-3.997	6.4e-05	0.0007	down	12	SLC48A1	47753916	47782751	solute carrier famil...	no	no	no	no
ENSG00000213190	864.895	0.967	0.262	3.685	0.00023	0.002	up	1	MLLT11	151060397	151069544	MLLT11 transcription...	no	no	no	no
ENSG00000213222	131.001	0.814	0.254	3.197	0.001	0.01	up	2	TOMM40P4	131723253	131724279	TOMM40 pseudogene 4 ...	no	no	no	no
ENSG00000213654	198.619	1.145	0.171	6.687	2.3e-11	1e-09	up	6	GPSM3	32190766	32195523	G protein signaling ...	no	no	no	no
ENSG00000213707	56.173	-0.773	0.213	-3.623	0.00029	0.003	down	22	HMGB1P10	26560526	26561088	high mobility group ...	no	no	no	no
ENSG00000213782	80.865	0.598	0.178	3.37	0.00075	0.006	up	12	DDX47	12813316	12829981	DEAD-box helicase 47...	no	no	no	no
ENSG00000213928	84.961	1.003	0.19	5.289	1.2e-07	2.6e-06	up	14	IRF9	24161234	24168043	interferon regulator...	no	no	no	no
ENSG00000214193	1425.52	0.84	0.165	5.091	3.6e-07	6.9e-06	up	1	SH3D21	36306368	36329340	SH3 domain containin...	no	no	no	no
ENSG00000214530	467.45	0.643	0.166	3.877	0.00011	0.001	up	11	STARD10	72754729	72794047	StAR related lipid t...	no	no	no	no
ENSG00000214595	101.941	-1.043	0.262	-3.987	6.7e-05	0.00073	down	2	EML6	54723499	54972025	EMAP like 6 [Source:...	no	no	no	no
ENSG00000215374	123.843	2.21	0.269	8.201	2.4e-16	2.1e-14	up	8	FAM66B	7298744	7355359	family with sequence...	no	no	no	no
ENSG00000215580	62.137	1.284	0.223	5.766	8.1e-09	2.2e-07	up	Y	BCORP1	19456585	19484884	BCL6 corepressor pse...	no	no	no	no
ENSG00000215788	229.016	1.83	0.209	8.767	1.8e-18	2.2e-16	up	1	TNFRSF25	6460786	6466175	TNF receptor superfa...	no	no	no	no
ENSG00000215808	87.633	1.966	0.241	8.145	3.8e-16	3.2e-14	up	1	LINC01139	238476542	238486060	long intergenic non-...	no	no	no	no
ENSG00000215861	288.681	-0.867	0.149	-5.812	6.2e-09	1.7e-07	down	1	ENSG00000215861	149197992	149321732	phosphodiesterase 4D...	no	no	no	no
ENSG00000215883	256.744	-0.64	0.217	-2.951	0.003	0.019	down	1	CYB5RL	54169651	54200036	cytochrome b5 reduct...	no	no	no	no
ENSG00000215908	920.071	0.658	0.192	3.434	0.00059	0.005	up	1	CROCCP2	16618969	16657232	CROCC pseudogene 2 [...	no	no	no	no
ENSG00000217236	70.471	4.385	1.05	4.176	3e-05	0.00035	up	2	SP9	174334954	174338500	Sp9 transcription fa...	no	no	no	no
ENSG00000218336	6529.71	1.444	0.228	6.334	2.4e-10	8.8e-09	up	4	TENM3	182143987	182803024	teneurin transmembra...	no	no	no	no
ENSG00000219438	2304.07	-1.238	0.199	-6.232	4.6e-10	1.6e-08	down	22	TAFA5	48489553	48850912	TAFA chemokine like ...	no	no	no	no
ENSG00000221852	772.784	-2.037	0.442	-4.609	4e-06	6.1e-05	down	17	KRTAP1-5	41026026	41027208	keratin associated p...	no	no	no	no
ENSG00000221949	40.53	-0.826	0.296	-2.792	0.005	0.028	down	12	LINC01465	62601751	62603690	long intergenic non-...	no	no	no	no
ENSG00000221955	441.514	0.919	0.188	4.892	1e-06	1.8e-05	up	3	SLC12A8	125082636	125212864	solute carrier famil...	no	no	no	no
ENSG00000221990	117.398	0.632	0.154	4.104	4.1e-05	0.00046	up	5	EXOC3-AS1	441498	443160	EXOC3 antisense RNA ...	no	no	no	no
ENSG00000222032	48.213	2.032	0.399	5.098	3.4e-07	6.7e-06	up	2	ENSG00000222032	237428920	237434883	novel protein (LOC72...	no	no	no	no
ENSG00000223458	26.622	-2.828	0.746	-3.791	0.00015	0.001	down	13	LMO7DN-IT1	75876886	75881127	LMO7DN intronic tran...	no	no	no	no
ENSG00000223865	134.806	0.726	0.17	4.271	1.9e-05	0.00024	up	6	HLA-DPB1	33075990	33089696	major histocompatibi...	no	no	no	no
ENSG00000224577	129.503	-0.63	0.19	-3.321	0.0009	0.007	down	2	LINC01117	176495255	176819725	long intergenic non-...	no	no	no	no
ENSG00000224594	129.274	0.881	0.122	7.241	4.5e-13	2.5e-11	up	8	RPL29P19	48384590	48385049	ribosomal protein L2...	no	no	no	no
ENSG00000225138	629.998	0.976	0.227	4.297	1.7e-05	0.00022	up	5	SLC9A3-AS1	473236	480884	SLC9A3 antisense RNA...	no	no	no	no
ENSG00000225313	94.173	0.767	0.199	3.85	0.00012	0.001	up	1	ENSG00000225313	33307348	33349245	novel transcript	no	no	no	no
ENSG00000225756	22.924	-2.38	0.705	-3.379	0.00073	0.006	down	9	DBH-AS1	133654586	133657313	DBH antisense RNA 1 ...	no	no	no	no
ENSG00000225783	441.411	2.963	0.371	7.98	1.5e-15	1.1e-13	up	22	MIAT	26646411	26676475	myocardial infarctio...	no	no	no	no
ENSG00000225972	280.372	6.508	1.437	4.53	5.9e-06	8.5e-05	up	1	MTND1P23	629062	629433	MT-ND1 pseudogene 23...	no	no	no	no
ENSG00000226445	126.408	-0.847	0.219	-3.864	0.00011	0.001	down	6	THBS2-AS1	169213254	169245773	THBS2 antisense RNA ...	no	no	no	no
ENSG00000227036	225.158	2.343	0.235	9.976	1.9e-23	4.1e-21	up	17	LINC00511	72290091	72640472	long intergenic non-...	no	no	no	no
ENSG00000227039	56.609	-1.806	0.32	-5.652	1.6e-08	4e-07	down	21	ITGB2-AS1	44921051	44929680	ITGB2 antisense RNA ...	no	no	no	no
ENSG00000227232	194.796	0.856	0.198	4.331	1.5e-05	0.00019	up	1	WASH7P	14404	29570	WASP family homolog ...	no	no	no	no
ENSG00000227398	96.587	0.585	0.175	3.354	0.0008	0.006	up	3	KIF9-AS1	47164186	47246601	KIF9 antisense RNA 1...	no	no	no	no
ENSG00000227496	59.446	0.769	0.225	3.416	0.00063	0.005	up	1	ENSG00000227496	225700264	225752258	novel transcript	no	no	no	no
ENSG00000227619	905.25	2.19	0.421	5.208	1.9e-07	3.9e-06	up	9	ENSG00000227619	129575117	129584556	novel transcript	no	no	no	no
ENSG00000227827	118.966	-2.436	0.299	-8.137	4.1e-16	3.4e-14	down	16	PKD1P2	16356224	16377507	polycystin 1, transi...	no	no	no	no
ENSG00000228436	45.951	-0.772	0.273	-2.832	0.005	0.026	down	1	RRAGC-DT	38859912	38965038	RRAGC divergent tran...	no	no	no	no
ENSG00000228451	104.411	0.916	0.191	4.792	1.7e-06	2.7e-05	up	8	SDAD1P1	26375913	26382988	SDA1 domain containi...	no	no	no	no
ENSG00000228495	67.327	2.338	0.291	8.03	9.7e-16	7.6e-14	up	6	LINC01013	131901848	132169992	long intergenic non-...	no	no	no	no
ENSG00000228506	96.536	0.784	0.164	4.768	1.9e-06	3e-05	up	6	PNISR-AS1	99424911	99432326	PNISR antisense RNA ...	no	no	no	no
ENSG00000228509	41.091	-2.268	0.446	-5.089	3.6e-07	7e-06	down	2	ENSG00000228509	190672297	190843734	novel transcript, an...	no	no	no	no
ENSG00000228594	292.288	-0.769	0.168	-4.591	4.4e-06	6.6e-05	down	1	FNDC10	1598012	1600135	fibronectin type III...	no	no	no	no
ENSG00000228630	19.147	4.744	1.716	2.764	0.006	0.031	up	12	HOTAIR	53962308	53974956	HOX transcript antis...	no	no	no	no
ENSG00000228672	153.652	-1.151	0.179	-6.411	1.4e-10	5.5e-09	down	5	PROB1	139390592	139395104	proline rich basic p...	no	no	no	no
ENSG00000229043	194.834	-0.642	0.217	-2.962	0.003	0.019	down	7	ZFAND2A-DT	1160374	1165607	ZFAND2A divergent tr...	no	no	no	no
ENSG00000229689	109.696	0.738	0.193	3.829	0.00013	0.001	up	2	ANKRD33BP1	95525345	95527220	ANKRD33B pseudogene ...	no	no	no	no
ENSG00000230202	127.347	0.932	0.361	2.58	0.01	0.047	up	6	ENSG00000230202	117998975	117999448	ribosomal protein L2...	no	no	no	no
ENSG00000230267	87.827	-2.363	0.628	-3.761	0.00017	0.002	down	16	HERC2P4	32152111	32187070	HERC2 pseudogene 4 [...	no	no	no	no
ENSG00000230453	35.824	2.416	0.404	5.973	2.3e-09	7e-08	up	9	ANKRD18B	33524251	33608848	ankyrin repeat domai...	no	no	no	no
ENSG00000230623	136.555	2.354	0.282	8.36	6.3e-17	6.1e-15	up	1	ENSG00000230623	200333193	200478669	novel transcript, an...	no	no	no	no
ENSG00000230838	49.157	2.994	0.617	4.853	1.2e-06	2.1e-05	up	2	LINC01614	215718043	215720944	long intergenic non-...	no	no	no	no
ENSG00000231160	71.357	1.449	0.308	4.704	2.5e-06	4e-05	up	4	KLF3-AS1	38602438	38664926	KLF3 antisense RNA 1...	no	no	no	no
ENSG00000231389	67.588	-1.585	0.234	-6.783	1.2e-11	5.4e-10	down	6	HLA-DPA1	33064569	33080775	major histocompatibi...	no	no	no	no
ENSG00000231437	20.762	-1.827	0.583	-3.136	0.002	0.012	down	1	LINC01750	111989770	111998842	long intergenic non-...	no	no	no	no
ENSG00000231453	182.155	1.398	0.468	2.985	0.003	0.017	up	2	LINC01305	174326027	174330643	long intergenic non-...	no	no	no	no
ENSG00000231991	366.181	-0.843	0.19	-4.431	9.4e-06	0.00013	down	9	ANXA2P2	33624274	33625293	annexin A2 pseudogen...	no	no	no	no
ENSG00000232004	123.129	-0.861	0.201	-4.287	1.8e-05	0.00023	down	10	CAP1P2	43604843	43606251	CAP1 pseudogene 2 [S...	no	no	no	no
ENSG00000232063	77.764	2.384	0.265	9	2.3e-19	3.2e-17	up	9	ENSG00000232063	94332459	94363013	novel transcript	no	no	no	no
ENSG00000232415	36.591	-1.816	0.532	-3.415	0.00064	0.005	down	7	ELN-AS1	74058905	74062287	ELN antisense RNA 1 ...	no	no	no	no
ENSG00000232527	269.506	0.955	0.215	4.446	8.8e-06	0.00012	up	1	LINC02802	144227029	144250326	long intergenic non-...	no	no	no	no
ENSG00000232573	256.527	2.046	0.376	5.449	5.1e-08	1.1e-06	up	14	RPL3P4	98972879	98973301	ribosomal protein L3...	no	no	no	no
ENSG00000232677	357.441	0.624	0.203	3.074	0.002	0.014	up	19	LINC00665	36259540	36331770	long intergenic non-...	no	no	no	no
ENSG00000232977	460.244	0.911	0.131	6.963	3.3e-12	1.7e-10	up	13	LINC00327	23465776	23487712	long intergenic non-...	no	no	no	no
ENSG00000233058	79.861	0.603	0.177	3.403	0.00067	0.005	up	3	ATP13A3-DT	194487140	194521156	ATP13A3 divergent tr...	no	no	no	no
ENSG00000233101	554.01	-1.325	0.471	-2.815	0.005	0.027	down	17	HOXB-AS3	48549630	48606414	HOXB cluster antisen...	no	no	no	no
ENSG00000233251	204.487	-3.123	0.339	-9.224	2.9e-20	4.2e-18	down	2	ENSG00000233251	56173534	56185870	novel transcript, an...	no	no	no	no
ENSG00000233452	121.779	0.776	0.207	3.743	0.00018	0.002	up	6	STXBP5-AS1	146824539	147204614	STXBP5 antisense RNA...	no	no	no	no
ENSG00000233818	53.687	2.501	0.421	5.935	2.9e-09	8.8e-08	up	21	CLDN14-AS1	36445731	36532408	CLDN14 antisense RNA...	no	no	no	no
ENSG00000233822	28.996	-0.944	0.302	-3.123	0.002	0.012	down	6	H2BC15	27838545	27855709	H2B clustered histon...	no	no	no	no
ENSG00000233967	122.984	0.817	0.216	3.776	0.00016	0.002	up	6	ENSG00000233967	80441295	80466674	novel transcript	no	no	no	no
ENSG00000234199	33.215	-1.698	0.623	-2.724	0.006	0.034	down	2	LINC01191	113970719	114007304	long intergenic non-...	no	no	no	no
ENSG00000234771	114.178	0.844	0.213	3.956	7.6e-05	0.00081	up	9	SLC25A25-AS1	128108581	128118693	SLC25A25 antisense R...	no	no	no	no
ENSG00000234883	82.13	1.374	0.263	5.213	1.9e-07	3.8e-06	up	21	MIR155HG	25561810	25575168	MIR155 host gene [So...	no	no	no	no
ENSG00000234975	28.719	-2.087	0.539	-3.874	0.00011	0.001	down	1	FTH1P2	228687415	228687826	ferritin heavy chain...	no	no	no	no
ENSG00000235257	94.751	-0.885	0.21	-4.211	2.5e-05	0.0003	down	3	ITGA9-AS1	37693655	37861802	ITGA9 antisense RNA ...	no	no	no	no
ENSG00000235649	311.167	-2.168	0.332	-6.526	6.8e-11	2.7e-09	down	Y	MXRA5Y	11957208	11987386	matrix remodeling as...	no	no	no	no
ENSG00000235823	141.31	0.6	0.208	2.88	0.004	0.023	up	10	OLMALINC	100373099	100454043	oligodendrocyte matu...	no	no	no	no
ENSG00000235997	100.353	-1.218	0.417	-2.924	0.003	0.02	down	2	LINC01936	30346623	30361010	long intergenic non-...	no	no	no	no
ENSG00000236333	151.152	10.288	0.88	11.693	1.4e-31	5.6e-29	up	12	TRHDE-AS1	72249964	72276954	TRHDE antisense RNA ...	no	no	no	no
ENSG00000236609	62.309	4	0.568	7.04	1.9e-12	9.9e-11	up	7	ZNF853	6615610	6624290	zinc finger protein ...	no	no	no	no
ENSG00000236682	51.755	0.835	0.264	3.162	0.002	0.011	up	2	MAP3K2-DT	127388173	127406228	MAP3K2 divergent tra...	no	no	no	no
ENSG00000237234	25.603	2.518	0.78	3.23	0.001	0.009	up	6	ENSG00000237234	112154765	112166476	novel transcript	no	no	no	no
ENSG00000237298	151.43	1.001	0.128	7.837	4.6e-15	3.4e-13	up	2	TTN-AS1	178521183	178779963	TTN antisense RNA 1 ...	no	no	no	no
ENSG00000237523	73.036	1.393	0.236	5.907	3.5e-09	1e-07	up	10	LINC00857	80207372	80219657	long intergenic non-...	no	no	no	no
ENSG00000237807	338.965	-0.915	0.338	-2.712	0.007	0.035	down	8	LINC02984	53493523	53524336	long intergenic non-...	no	no	no	no
ENSG00000237854	181.016	-0.648	0.203	-3.186	0.001	0.01	down	17	LINC00674	68101908	68114527	long intergenic non-...	no	no	no	no
ENSG00000237945	77.575	3.369	0.318	10.589	3.3e-26	9.6e-24	up	21	LINC00649	33915534	33977703	long intergenic non-...	no	no	no	no
ENSG00000237973	3107.73	1.705	0.493	3.46	0.00054	0.004	up	1	MTCO1P12	631074	632616	MT-CO1 pseudogene 12...	no	no	no	no
ENSG00000237989	82.782	3.777	0.257	14.7	6.5e-49	7.7e-46	up	21	LINC01679	43358147	43362349	long intergenic non-...	no	no	no	no
ENSG00000238113	135.827	0.599	0.13	4.616	3.9e-06	5.9e-05	up	9	LINC01410	62801461	62813486	long intergenic non-...	no	no	no	no
ENSG00000239264	318.986	0.894	0.2	4.471	7.8e-06	0.00011	up	6	TXNDC5	7881517	7910788	thioredoxin domain c...	no	no	no	no
ENSG00000240342	3489.43	0.611	0.14	4.377	1.2e-05	0.00016	up	12	RPS2P5	118246084	118246962	ribosomal protein S2...	no	no	no	no
ENSG00000240563	58.938	5.509	0.901	6.112	9.8e-10	3.2e-08	up	1	L1TD1	62194849	62212328	LINE1 type transposa...	no	no	no	no
ENSG00000240694	66.712	-1.121	0.314	-3.569	0.00036	0.003	down	8	PNMA2	26504701	26514092	PNMA family member 2...	no	no	no	no
ENSG00000241644	36.951	-2.855	0.653	-4.371	1.2e-05	0.00016	down	7	INMT	30697985	30757602	indolethylamine N-me...	no	no	no	no
ENSG00000241749	80.221	0.947	0.29	3.263	0.001	0.008	up	12	RPSAP52	65758020	65826997	ribosomal protein SA...	no	no	no	no
ENSG00000241839	1698.95	-1.019	0.196	-5.207	1.9e-07	3.9e-06	down	15	PLEKHO2	64841883	64868002	pleckstrin homology ...	no	no	no	no
ENSG00000241945	243.674	2.447	0.337	7.262	3.8e-13	2.2e-11	up	21	PWP2	44107373	44131181	PWP2 small subunit p...	no	no	no	no
ENSG00000242779	126.744	1.034	0.278	3.715	0.0002	0.002	up	19	ZNF702P	52966896	53037898	zinc finger protein ...	no	no	no	no
ENSG00000243679	395.192	-0.746	0.278	-2.684	0.007	0.037	down	7	ENSG00000243679	128653969	128654722	novel pseudogene	no	no	no	no
ENSG00000243753	100.017	0.775	0.265	2.928	0.003	0.02	up	6	HLA-L	30259625	30261703	major histocompatibi...	no	no	no	no
ENSG00000243927	955.449	0.834	0.168	4.967	6.8e-07	1.2e-05	up	21	MRPS6	34073224	34143034	mitochondrial riboso...	no	no	no	no
ENSG00000244165	85.4	0.633	0.182	3.479	0.0005	0.004	up	19	P2RY11	10111693	10115372	purinergic receptor ...	no	no	no	no
ENSG00000244300	275.312	1.65	0.367	4.494	7e-06	9.9e-05	up	3	GATA2-AS1	128489212	128502970	GATA2 antisense RNA ...	no	no	no	no
ENSG00000244486	3870.09	-1.178	0.178	-6.618	3.7e-11	1.6e-09	down	22	SCARF2	20424584	20437826	scavenger receptor c...	no	no	no	no
ENSG00000244509	3158.46	-0.621	0.064	-9.776	1.4e-22	2.9e-20	down	22	APOBEC3C	39014257	39020352	apolipoprotein B mRN...	no	no	no	no
ENSG00000244578	38.228	1.171	0.304	3.853	0.00012	0.001	up	3	LINC01391	138935189	138944020	long intergenic non-...	no	no	no	no
ENSG00000244586	231.928	1.534	0.316	4.857	1.2e-06	2.1e-05	up	3	WNT5A-AS1	55487699	55488308	WNT5A antisense RNA ...	no	no	no	no
ENSG00000244649	203.016	5.507	0.549	10.037	1.1e-23	2.3e-21	up	17	LINC02086	48646923	48707346	long intergenic non-...	no	no	no	no
ENSG00000245025	75.158	-0.791	0.307	-2.577	0.01	0.047	down	8	ENSG00000245025	22984596	23019335	novel transcript, an...	no	no	no	no
ENSG00000245149	106.085	0.619	0.196	3.152	0.002	0.011	up	8	RNF139-DT	124462485	124474582	RNF139 divergent tra...	no	no	no	no
ENSG00000246430	145.074	1.078	0.389	2.771	0.006	0.03	up	8	LINC00968	56494309	56559823	long intergenic non-...	no	no	no	no
ENSG00000246763	341.9	0.761	0.18	4.223	2.4e-05	0.00029	up	5	RGMB-AS1	98769618	98773469	RGMB antisense RNA 1...	no	no	no	no
ENSG00000246859	1583.8	1.223	0.255	4.795	1.6e-06	2.7e-05	up	5	STARD4-AS1	111510396	111739726	STARD4 antisense RNA...	no	no	no	no
ENSG00000247092	149.773	0.68	0.148	4.578	4.7e-06	7e-05	up	14	SNHG10	95521943	95534889	small nucleolar RNA ...	no	no	no	no
ENSG00000247095	395.346	1.527	0.254	6.012	1.8e-09	5.6e-08	up	11	MIR210HG	565657	568457	MIR210 host gene [So...	no	no	no	no
ENSG00000247498	45.308	1.496	0.387	3.866	0.00011	0.001	up	12	GPRC5D-AS1	12927712	12984645	GPRC5D and HEBP1 ant...	no	no	no	no
ENSG00000248323	50.959	1.616	0.353	4.583	4.6e-06	6.8e-05	up	5	LUCAT1	91054834	91314547	lung cancer associat...	no	no	no	no
ENSG00000248334	214.802	1.968	0.193	10.205	1.9e-24	4.4e-22	up	15	WHAMMP2	28737583	28754869	WHAMM pseudogene 2 [...	no	no	no	no
ENSG00000248698	409.112	-1.399	0.208	-6.719	1.8e-11	8.1e-10	down	4	LINC01085	14111968	14140052	long intergenic non-...	no	no	no	no
ENSG00000248866	80.793	-0.712	0.198	-3.602	0.00032	0.003	down	4	USP46-DT	52659406	52661668	USP46 divergent tran...	no	no	no	no
ENSG00000248869	30.149	1.576	0.537	2.935	0.003	0.02	up	4	LINC02511	136795919	137212799	long intergenic non-...	no	no	no	no
ENSG00000250033	30.974	1.537	0.491	3.132	0.002	0.012	up	4	SLC7A11-AS1	138057464	138178177	SLC7A11 antisense RN...	no	no	no	no
ENSG00000250133	32.676	5.397	0.943	5.726	1e-08	2.7e-07	up	12	HOXC-AS2	53993810	53996785	HOXC cluster antisen...	no	no	no	no
ENSG00000250337	47.028	-2.068	0.353	-5.851	4.9e-09	1.4e-07	down	5	PURPL	27217714	27497871	p53 upregulated regu...	no	no	no	no
ENSG00000250510	84.866	1.076	0.259	4.148	3.4e-05	0.00039	up	12	GPR162	6821624	6829972	G protein-coupled re...	no	no	no	no
ENSG00000250722	138.082	2.545	0.512	4.967	6.8e-07	1.2e-05	up	5	SELENOP	42799880	42887392	selenoprotein P [Sou...	no	no	no	no
ENSG00000250786	1037.17	1.4	0.224	6.258	3.9e-10	1.4e-08	up	5	SNHG18	9546170	9550725	small nucleolar RNA ...	no	no	no	no
ENSG00000250986	48.549	-2.497	0.372	-6.709	2e-11	8.7e-10	down	4	LINC02600	3758748	3763390	long intergenic non-...	no	no	no	no
ENSG00000253159	1634.04	-0.922	0.137	-6.73	1.7e-11	7.6e-10	down	5	PCDHGA12	141430507	141512975	protocadherin gamma ...	no	no	no	no
ENSG00000253210	50.825	-0.645	0.212	-3.042	0.002	0.015	down	8	DENND3-AS1	141124678	141130070	DENND3 antisense RNA...	no	no	no	no
ENSG00000253368	4536.08	1.017	0.304	3.35	0.00081	0.006	up	1	TRNP1	26993692	27000886	TMF1 regulated nucle...	no	no	no	no
ENSG00000253537	242.134	-0.601	0.182	-3.31	0.00093	0.007	down	5	PCDHGA7	141382739	141512975	protocadherin gamma ...	no	no	no	no
ENSG00000253570	37.567	7.867	1.134	6.938	4e-12	2e-10	up	8	RNF5P1	38600661	38601200	ring finger protein ...	no	no	no	no
ENSG00000253767	54.161	-1	0.257	-3.889	0.0001	0.001	down	5	PCDHGA8	141390157	141512975	protocadherin gamma ...	no	no	no	no
ENSG00000253953	360.624	-0.995	0.248	-4.012	6e-05	0.00066	down	5	PCDHGB4	141387698	141512975	protocadherin gamma ...	no	no	no	no
ENSG00000254087	228.343	1.565	0.218	7.167	7.7e-13	4.2e-11	up	8	LYN	55879835	56014169	LYN proto-oncogene, ...	no	no	no	no
ENSG00000254245	81.547	0.653	0.211	3.101	0.002	0.013	up	5	PCDHGA3	141343829	141512975	protocadherin gamma ...	no	no	no	no
ENSG00000254343	25.867	-2.577	0.46	-5.596	2.2e-08	5.4e-07	down	8	ENSG00000254343	120052180	120056201	novel transcript	no	no	no	no
ENSG00000254602	44.07	-0.734	0.271	-2.712	0.007	0.035	down	11	MIR130AHG	57638024	57652790	MIR130A host gene [S...	no	no	no	no
ENSG00000254681	504.578	-2.719	0.206	-13.224	6.4e-40	4.7e-37	down	16	PKD1P5	18374521	18401940	polycystin 1, transi...	no	no	no	no
ENSG00000254726	198.419	1.051	0.379	2.776	0.006	0.03	up	1	MEX3A	156072013	156082465	mex-3 RNA binding fa...	no	no	no	no
ENSG00000254837	80.109	0.769	0.211	3.65	0.00026	0.002	up	11	LIPT2-AS1	74493366	74498533	LIPT2 antisense RNA ...	no	no	no	no
ENSG00000254851	87.349	-3.468	0.576	-6.018	1.8e-09	5.5e-08	down	11	ENSG00000254851	117135528	117138582	proprotein convertas...	no	no	no	no
ENSG00000255052	147.773	0.745	0.223	3.339	0.00084	0.006	up	8	FAM66D	12115767	12177550	family with sequence...	no	no	no	no
ENSG00000255135	76.092	0.656	0.227	2.885	0.004	0.023	up	11	EMSY-DT	76435559	76444690	EMSY divergent trans...	no	no	no	no
ENSG00000255306	43.325	-0.715	0.276	-2.586	0.01	0.047	down	11	ENSG00000255306	68024809	68030461	novel transcript	no	no	no	no
ENSG00000255471	24.101	-2.106	0.351	-5.999	2e-09	6.1e-08	down	11	PRSS23-AS1	86892214	86925037	PRSS23 antisense RNA...	no	no	no	no
ENSG00000255642	138.709	0.827	0.171	4.842	1.3e-06	2.2e-05	up	12	PABPC1P4	63822021	63823895	poly(A) binding prot...	no	no	no	no
ENSG00000256235	1497.11	0.942	0.154	6.099	1.1e-09	3.5e-08	up	5	SMIM3	150778757	150796734	small integral membr...	no	no	no	no
ENSG00000256806	91.964	0.729	0.255	2.862	0.004	0.024	up	17	C17orf100	6651762	6693202	chromosome 17 open r...	no	no	no	no
ENSG00000257219	118.305	-2.061	0.427	-4.823	1.4e-06	2.4e-05	down	12	LNCOG	76259836	76305969	lncRNA osteogenesis ...	no	no	no	no
ENSG00000257642	75.586	-1.116	0.323	-3.453	0.00055	0.004	down	12	C12orf75-AS1	105304867	105327017	C12orf75 antisense R...	no	no	no	no
ENSG00000257671	61.629	1.843	0.688	2.679	0.007	0.038	up	12	KRT7-AS	52245048	52247448	KRT7 antisense RNA 1...	no	no	no	no
ENSG00000257698	183.723	0.61	0.11	5.522	3.4e-08	7.9e-07	up	12	GIHCG	57930115	57936345	GIHCG inhibitor of m...	no	no	no	no
ENSG00000258947	76.46	0.887	0.285	3.114	0.002	0.012	up	16	TUBB3	89921392	89938761	tubulin beta 3 class...	no	no	no	no
ENSG00000259207	756.608	0.836	0.319	2.623	0.009	0.043	up	17	ITGB3	47253827	47313743	integrin subunit bet...	no	no	no	no
ENSG00000259330	1433.61	-1.13	0.228	-4.954	7.3e-07	1.3e-05	down	15	INAFM2	40323692	40326715	InaF motif containin...	no	no	no	no
ENSG00000259429	87.433	0.697	0.214	3.259	0.001	0.008	up	15	UBE2Q2P2	82391844	82420075	UBE2Q2 pseudogene 2 ...	no	no	no	no
ENSG00000259518	131.052	2.774	0.58	4.779	1.8e-06	2.9e-05	up	15	LINC01583	82088569	82097694	long intergenic non-...	no	no	no	no
ENSG00000259583	138.891	-1.201	0.288	-4.169	3.1e-05	0.00036	down	15	ALDH1A3-AS1	100892343	100919391	ALDH1A3 antisense RN...	no	no	no	no
ENSG00000259943	109.527	0.779	0.168	4.641	3.5e-06	5.3e-05	up	1	ZMPSTE24-DT	40256333	40257971	ZMPSTE24 divergent t...	no	no	no	no
ENSG00000260027	714.352	0.842	0.204	4.132	3.6e-05	0.00041	up	17	HOXB7	48607232	48633572	homeobox B7 [Source:...	no	no	no	no
ENSG00000260077	97.321	0.915	0.163	5.623	1.9e-08	4.7e-07	up	2	ENSG00000260077	10039092	10040663	novel transcript	no	no	no	no
ENSG00000260196	67.987	-1.137	0.271	-4.196	2.7e-05	0.00032	down	11	ENSG00000260196	17380649	17383531	antisense to KCNJ11 ...	no	no	no	no
ENSG00000260260	203.02	0.955	0.175	5.441	5.3e-08	1.2e-06	up	16	SNHG19	2154792	2155405	small nucleolar RNA ...	no	no	no	no
ENSG00000260261	62.409	1.353	0.235	5.761	8.3e-09	2.3e-07	up	3	ENSG00000260261	195953349	195954485	programmed cell deat...	no	no	no	no
ENSG00000260279	120.821	0.686	0.256	2.675	0.007	0.038	up	16	ENSG00000260279	89296128	89298317	novel transcript, an...	no	no	no	no
ENSG00000260517	81.166	-1.022	0.3	-3.408	0.00066	0.005	down	16	ENSG00000260517	29139661	29216706	novel transcript	no	no	no	no
ENSG00000260528	27.112	3.89	0.787	4.943	7.7e-07	1.4e-05	up	16	FAM157C	90102261	90178344	family with sequence...	no	no	no	no
ENSG00000260641	54.636	1.411	0.264	5.337	9.5e-08	2e-06	up	4	TSPAN5-DT	98658894	98664550	TSPAN5 divergent tra...	no	no	no	no
ENSG00000260751	59.202	0.874	0.232	3.774	0.00016	0.002	up	16	ENSG00000260751	23568673	23569696	novel transcript	no	no	no	no
ENSG00000260793	109.722	0.631	0.174	3.624	0.00029	0.003	up	17	ENSG00000260793	44221369	44223710	novel transcript, an...	no	no	no	no
ENSG00000260942	97.886	0.629	0.173	3.642	0.00027	0.002	up	2	CAPN10-DT	240582700	240586699	CAPN10 divergent tra...	no	no	no	no
ENSG00000261040	270.548	1.367	0.162	8.433	3.4e-17	3.4e-15	up	17	WFDC21P	60083562	60091885	WAP four-disulfide c...	no	no	no	no
ENSG00000261150	36.844	2.738	0.808	3.39	0.0007	0.005	up	8	EPPK1	143857324	143878467	epiplakin 1 [Source:...	no	no	no	no
ENSG00000261239	30.23	3.005	0.9	3.339	0.00084	0.006	up	16	ANKRD26P1	46518305	46568915	ankyrin repeat domai...	no	no	no	no
ENSG00000261326	123.816	0.87	0.279	3.118	0.002	0.012	up	1	LINC01355	23281307	23287488	long intergenic non-...	no	no	no	no
ENSG00000261327	65.207	1.865	0.706	2.643	0.008	0.041	up	16	ENSG00000261327	88177298	88186929	novel transcript	no	no	no	no
ENSG00000261379	27.15	-1.467	0.487	-3.015	0.003	0.016	down	2	ENSG00000261379	226804036	226805061	novel transcript	no	no	no	no
ENSG00000261512	92.519	-0.861	0.231	-3.724	0.0002	0.002	down	16	ENSG00000261512	46622861	46624451	novel transcript	no	no	no	no
ENSG00000261553	154.813	-1.454	0.337	-4.31	1.6e-05	0.00021	down	13	ENSG00000261553	75549773	75807120	novel transcript	no	no	no	no
ENSG00000261716	145.901	0.69	0.244	2.833	0.005	0.026	up	1	H2BC20P	149850193	149850772	H2B clustered histon...	no	no	no	no
ENSG00000261888	479.926	-1.73	0.248	-6.973	3.1e-12	1.6e-10	down	17	ENSG00000261888	83104255	83106910	novel transcript	no	no	no	no
ENSG00000262003	70.183	-1.843	0.47	-3.924	8.7e-05	0.00091	down	17	ENSG00000262003	909632	911212	novel transcript, an...	no	no	no	no
ENSG00000262185	77.896	-1.138	0.343	-3.318	0.00091	0.007	down	16	LINC02861	3930806	3950586	long intergenic non-...	no	no	no	no
ENSG00000262576	369.664	-2.048	0.246	-8.32	8.8e-17	8.3e-15	down	5	PCDHGA4	141355021	141512975	protocadherin gamma ...	no	no	no	no
ENSG00000262655	212.914	1.391	0.397	3.506	0.00045	0.004	up	11	SPON1	13962723	14268133	spondin 1 [Source:HG...	no	no	no	no
ENSG00000262814	125.248	-0.943	0.238	-3.97	7.2e-05	0.00077	down	17	MRPL12	81703367	81707517	mitochondrial riboso...	no	no	no	no
ENSG00000262902	299.369	5.318	0.834	6.376	1.8e-10	6.9e-09	up	17	MTCO1P40	53105734	53106358	MT-CO1 pseudogene 40...	no	no	no	no
ENSG00000263400	29.887	-1.139	0.347	-3.287	0.001	0.007	down	17	TMEM220-AS1	10729777	10815164	TMEM220 antisense RN...	no	no	no	no
ENSG00000264301	46.746	8.595	1.165	7.379	1.6e-13	9.6e-12	up	18	LINC01444	14969001	14970468	long intergenic non-...	no	no	no	no
ENSG00000265489	17.032	6.725	2.292	2.934	0.003	0.02	up	17	ARHGAP44-AS1	12760140	12790242	ARHGAP44 and MYOCD a...	no	no	no	no
ENSG00000265519	107.272	1.674	0.344	4.862	1.2e-06	2e-05	up	17	ENSG00000265519	15787787	15788205	novel transcript	no	no	no	no
ENSG00000265972	6541.36	1.827	0.28	6.528	6.7e-11	2.7e-09	up	1	TXNIP	145992435	145996579	thioredoxin interact...	no	no	no	no
ENSG00000266302	72.656	-1.895	0.643	-2.946	0.003	0.019	down	17	ENSG00000266302	16690261	16804453	novel transcript	no	no	no	no
ENSG00000266554	12.857	6.733	1.246	5.404	6.5e-08	1.4e-06	up	18	LINC01443	14946267	14974215	long intergenic non-...	no	no	no	no
ENSG00000266865	88.828	-0.808	0.206	-3.923	8.8e-05	0.00092	down	17	ENSG00000266865	31008754	31031946	SMAD specific E3 ubi...	no	no	no	no
ENSG00000267519	684.022	1.145	0.266	4.298	1.7e-05	0.00022	up	19	MIR23AHG	13823880	13842928	miR-23a/27a/24-2 clu...	no	no	no	no
ENSG00000268388	43.332	6.161	1.657	3.718	0.0002	0.002	up	16	FENDRR	86474529	86509099	FOXF1 adjacent non-c...	no	no	no	no
ENSG00000268516	88.48	0.795	0.141	5.655	1.6e-08	4e-07	up	19	ZNF8-DT	58257270	58278830	ZNF8 divergent trans...	no	no	no	no
ENSG00000268655	62.173	1.216	0.346	3.514	0.00044	0.004	up	19	ENSG00000268655	49017968	49020549	novel protein	no	no	no	no
ENSG00000268996	82.658	0.647	0.174	3.717	0.0002	0.002	up	9	MAN1B1-DT	137084946	137086817	MAN1B1 divergent tra...	no	no	no	no
ENSG00000269858	413.637	0.692	0.16	4.323	1.5e-05	0.0002	up	19	EGLN2	40798996	40808434	egl-9 family hypoxia...	no	no	no	no
ENSG00000269918	53.582	8.379	0.8	10.476	1.1e-25	3e-23	up	8	ENSG00000269918	11104691	11106704	novel transcript	no	no	no	no
ENSG00000269929	207.53	0.993	0.213	4.664	3.1e-06	4.8e-05	up	9	MIRLET7A1HG	94166258	94200902	miRlet-7a-1/let-7f-1...	no	no	no	no
ENSG00000270629	534.903	0.87	0.181	4.793	1.6e-06	2.7e-05	up	1	NBPF14	148531385	148679742	NBPF member 14 [Sour...	no	no	no	no
ENSG00000270885	56.211	1.288	0.354	3.638	0.00027	0.002	up	17	RASL10B	35731639	35743521	RAS like family 10 m...	no	no	no	no
ENSG00000271270	67.583	-0.837	0.268	-3.119	0.002	0.012	down	3	TMCC1-DT	129893811	129918578	TMCC1 divergent tran...	no	no	no	no
ENSG00000271614	43.356	-1.258	0.29	-4.329	1.5e-05	0.00019	down	12	ATP2B1-AS1	89708959	89712590	ATP2B1 antisense RNA...	no	no	no	no
ENSG00000272031	185.229	-0.925	0.133	-6.957	3.5e-12	1.7e-10	down	1	ANKRD34A	145959441	145964575	ankyrin repeat domai...	no	no	no	no
ENSG00000272341	164.371	0.87	0.184	4.739	2.1e-06	3.5e-05	up	6	ENSG00000272341	16764346	16766883	novel transcript	no	no	no	no
ENSG00000272398	311.092	5.224	0.933	5.601	2.1e-08	5.2e-07	up	6	CD24	106969831	106975627	CD24 molecule [Sourc...	no	no	no	no
ENSG00000272512	49.119	3.796	1.08	3.515	0.00044	0.004	up	1	ENSG00000272512	995966	998051	novel transcript	no	no	no	no
ENSG00000272734	349.819	0.907	0.201	4.502	6.7e-06	9.5e-05	up	10	ADIRF-AS1	86965345	86971311	ADIRF antisense RNA ...	no	no	no	no
ENSG00000272763	86.561	4.958	0.751	6.6	4.1e-11	1.7e-09	up	17	ENSG00000272763	48635923	48647023	novel transcript	no	no	no	no
ENSG00000272825	32.172	-1.813	0.429	-4.228	2.4e-05	0.00028	down	21	ENSG00000272825	44936303	44936954	novel transcript	no	no	no	no
ENSG00000272841	248.246	1.01	0.332	3.037	0.002	0.015	up	6	MAP3K4-AS1	160990318	160992342	MAP3K4 antisense RNA...	no	no	no	no
ENSG00000272870	81.643	0.688	0.185	3.72	0.0002	0.002	up	4	SAP30-DT	173349543	173370721	SAP30 divergent tran...	no	no	no	no
ENSG00000273018	123.97	-2.931	0.988	-2.965	0.003	0.018	down	17	FAM106A	18511221	18551705	family with sequence...	no	no	no	no
ENSG00000273136	370.27	-0.717	0.184	-3.89	0.0001	0.001	down	1	NBPF26	120723949	120842110	NBPF member 26 [Sour...	no	no	no	no
ENSG00000273344	103.244	0.608	0.222	2.741	0.006	0.032	up	7	PAXIP1-DT	155003421	155005703	PAXIP1 divergent tra...	no	no	no	no
ENSG00000274020	62.404	0.967	0.251	3.845	0.00012	0.001	up	1	LINC01138	148290889	148519604	long intergenic non-...	no	no	no	no
ENSG00000274180	1132.18	-0.831	0.253	-3.282	0.001	0.008	down	17	NATD1	21238870	21253410	N-acetyltransferase ...	no	no	no	no
ENSG00000274276	30.327	-2.494	0.574	-4.343	1.4e-05	0.00018	down	21	ENSG00000274276	6444869	6467513	cystathionine-beta-s...	no	no	no	no
ENSG00000274370	104.392	-1.572	0.431	-3.648	0.00026	0.002	down	17	ENSG00000274370	83098377	83098987	novel transcript	no	no	no	no
ENSG00000274565	373.947	0.909	0.218	4.168	3.1e-05	0.00036	up	17	ENSG00000274565	62626437	62627590	novel transcript	no	no	no	no
ENSG00000274602	512.276	-0.857	0.234	-3.67	0.00024	0.002	down	22	PI4KAP1	18534005	18548798	phosphatidylinositol...	no	no	no	no
ENSG00000274925	68.344	0.62	0.195	3.178	0.001	0.01	up	16	ZKSCAN2-DT	25257952	25261066	ZKSCAN2 divergent tr...	no	no	no	no
ENSG00000275216	33.55	-3.285	0.494	-6.651	2.9e-11	1.3e-09	down	13	ENSG00000275216	109269634	109278512	novel transcript	no	no	no	no
ENSG00000275464	198.558	-0.733	0.127	-5.752	8.8e-09	2.4e-07	down	21	ENSG00000275464	5130871	5154658	novel protein, simil...	no	no	no	no
ENSG00000275895	125.999	1.372	0.25	5.481	4.2e-08	9.8e-07	up	21	ENSG00000275895	6484623	6499248	U2 small nuclear RNA...	no	no	no	no
ENSG00000276107	992.599	-0.895	0.185	-4.85	1.2e-06	2.1e-05	down	15	THBS1-IT1	39586561	39587293	THBS1 intronic trans...	no	no	no	no
ENSG00000276141	304.912	0.638	0.131	4.881	1.1e-06	1.8e-05	up	15	WHAMMP3	22664359	22681605	WHAMM pseudogene 3 [...	no	no	no	no
ENSG00000276256	184.639	0.77	0.264	2.912	0.004	0.021	up	GL000195.1	ENSG00000276256	42939	49164		no	no	no	no
ENSG00000277072	305.017	-0.646	0.145	-4.449	8.6e-06	0.00012	down	7	STAG3L2	74882705	74890402	stromal antigen 3-li...	no	no	no	no
ENSG00000277586	17.126	-2.056	0.742	-2.773	0.006	0.03	down	8	NEFL	24950955	24956721	neurofilament light ...	no	no	no	no
ENSG00000277734	32.94	2.248	0.692	3.247	0.001	0.008	up	14	TRAC	22547506	22552156	T cell receptor alph...	no	no	no	no
ENSG00000278212	65.94	1.947	0.475	4.096	4.2e-05	0.00048	up	Y	ENSG00000278212	11153858	11159013	MAFF interacting pro...	no	no	no	no
ENSG00000278662	68.368	0.944	0.324	2.915	0.004	0.021	up	15	GOLGA6L10	82339993	82349475	golgin A6 family lik...	no	no	no	no
ENSG00000278709	51.158	1.137	0.255	4.459	8.2e-06	0.00011	up	20	NKILA	57710156	57712780	NF-kappaB interactin...	no	no	no	no
ENSG00000278730	630.616	-0.609	0.23	-2.652	0.008	0.04	down	17	ENSG00000278730	68126666	68129586	novel transcript	no	no	no	no
ENSG00000279108	48.616	-1.513	0.299	-5.063	4.1e-07	7.9e-06	down	19	ENSG00000279108	40840159	40842039	TEC	no	no	no	no
ENSG00000279118	249.08	-1.191	0.197	-6.033	1.6e-09	5e-08	down	5	ENSG00000279118	126496279	126498604	tec	no	no	no	no
ENSG00000279159	97.05	0.723	0.275	2.631	0.009	0.042	up	22	ENSG00000279159	29978950	30028236	novel transcript, an...	no	no	no	no
ENSG00000279342	51.337	0.891	0.34	2.622	0.009	0.043	up	11	ENSG00000279342	124789240	124792818	novel transcript, se...	no	no	no	no
ENSG00000279369	88.6	0.664	0.162	4.102	4.1e-05	0.00047	up	17	ENSG00000279369	63700847	63702670	TEC	no	no	no	no
ENSG00000280128	160.79	0.721	0.212	3.399	0.00068	0.005	up	6	ENSG00000280128	30282349	30286054	TEC	no	no	no	no
ENSG00000280202	63.427	-1.373	0.273	-5.039	4.7e-07	8.9e-06	down	12	ENSG00000280202	3610307	3612003	TEC	no	no	no	no
ENSG00000281383	115.789	-1.707	0.461	-3.705	0.00021	0.002	down	21	ENSG00000281383	8254592	8255514	novel transcript, si...	no	no	no	no
ENSG00000283196	704.058	0.676	0.142	4.77	1.8e-06	3e-05	up	2	ENSG00000283196	89580558	89581140	lymphocyte-specific ...	no	no	no	no
ENSG00000286013	39.651	-2.088	0.541	-3.858	0.00011	0.001	down	7	ENSG00000286013	106624072	106628696	novel transcript	no	no	no	no
ENSG00000286177	288.521	0.819	0.181	4.536	5.7e-06	8.3e-05	up	19	ENSG00000286177	41307397	41310412	novel transcript, an...	no	no	no	no
ENSG00000286214	21.807	2.983	0.595	5.012	5.4e-07	1e-05	up	7	COPG2IT1	130538954	130546900	COPG2 imprinted tran...	no	no	no	no
ENSG00000286251	34.401	7.072	0.994	7.111	1.2e-12	6.2e-11	up	4	ENSG00000286251	126431694	126735523	novel transcript	no	no	no	no
ENSG00000286423	62.995	0.977	0.26	3.752	0.00018	0.002	up	14	ENSG00000286423	71179053	71243841	novel transcript	no	no	no	no
ENSG00000286619	106.103	-1.834	0.505	-3.633	0.00028	0.003	down	1	ENSG00000286619	205813322	205896082	novel transcript, an...	no	no	no	no
ENSG00000287023	28.54	-1.497	0.471	-3.174	0.002	0.01	down	10	ENSG00000287023	4746530	4785100	novel transcript	no	no	no	no
ENSG00000287168	130.138	0.955	0.147	6.484	8.9e-11	3.5e-09	up	9	ENSG00000287168	62801534	62802715	novel transcript	no	no	no	no
ENSG00000287263	209.212	0.896	0.154	5.828	5.6e-09	1.6e-07	up	5	ENSG00000287263	42983636	42993340	novel transcript	no	no	no	no
ENSG00000287281	101.836	1.245	0.249	4.997	5.8e-07	1.1e-05	up	18	ENSG00000287281	75455787	75468835	novel transcript	no	no	no	no
ENSG00000287431	128.595	0.754	0.211	3.573	0.00035	0.003	up	17	RENO1	81339183	81345966	regulator of early n...	no	no	no	no
ENSG00000287516	22.377	-2.001	0.729	-2.743	0.006	0.032	down	1	ENSG00000287516	241413716	241468661	novel transcript	no	no	no	no
ENSG00000287853	148.221	-4.492	0.318	-14.143	2.1e-45	2.1e-42	down	20	ENSG00000287853	34132270	34136485	novel transcript	no	no	no	no
ENSG00000287865	47.641	2.453	0.502	4.882	1.1e-06	1.8e-05	up	7	ENSG00000287865	155203671	155217134	novel transcript	no	no	no	no
ENSG00000287872	138.6	4.756	0.566	8.397	4.6e-17	4.5e-15	up	15	ENSG00000287872	82113384	82119570	novel transcript	no	no	no	no
ENSG00000288075	98.115	2.794	0.347	8.056	7.9e-16	6.2e-14	up	4	ENSG00000288075	9034519	9381269	novel transcript	no	no	no	no
ENSG00000288398	151.343	-0.615	0.178	-3.444	0.00057	0.005	down	1	ENSG00000288398	16228674	16231335	novel transcript	no	no	no	no

## Sheet: Fibroblasts-FDR0.01
RNAseq Analysis Fibroblast - Jacobs
ensembl_gene_id	baseMean	log2FoldChange	lfcSE	stat	pvalue	padj	regulation	chromosome_name	hgnc_symbol	start_position	end_position	description	isPAR	escape_Tukianien	variable_Tukianien	inactive_Tukianien
ENSG00000001617	573.183	-0.999	0.24	-4.169	3.1e-05	0.00036	down	3	SEMA3F	50155045	50189075	semaphorin 3F [Sourc...	no	no	no	no
ENSG00000001630	126.926	-1.004	0.221	-4.542	5.6e-06	8.1e-05	down	7	CYP51A1	92084987	92134803	cytochrome P450 fami...	no	no	no	no
ENSG00000003400	143.619	-1.839	0.361	-5.102	3.4e-07	6.6e-06	down	2	CASP10	201182872	201229428	caspase 10 [Source:H...	no	no	no	no
ENSG00000004399	11012.9	-1.028	0.18	-5.697	1.2e-08	3.2e-07	down	3	PLXND1	129555214	129606676	plexin D1 [Source:HG...	no	no	no	no
ENSG00000004766	906.686	-0.318	0.08	-3.974	7.1e-05	0.00076	down	7	VPS50	93232340	93361123	VPS50 subunit of EAR...	no	no	no	no
ENSG00000005059	650.822	-0.622	0.17	-3.666	0.00025	0.002	down	4	MCUB	109560209	109688719	mitochondrial calciu...	no	no	no	no
ENSG00000005243	3327.76	-0.423	0.105	-4.032	5.5e-05	0.00061	down	17	COPZ2	48026167	48038030	COPI coat complex su...	no	no	no	no
ENSG00000005379	654.366	1.415	0.195	7.242	4.4e-13	2.5e-11	up	17	TSPOAP1	58301228	58328795	TSPO associated prot...	no	no	no	no
ENSG00000005471	147.569	2.59	0.385	6.729	1.7e-11	7.7e-10	up	7	ABCB4	87401696	87480435	ATP binding cassette...	no	no	no	no
ENSG00000005810	3784.13	-1.099	0.203	-5.402	6.6e-08	1.5e-06	down	13	MYCBP2	77042474	77327094	MYC binding protein ...	no	no	no	no
ENSG00000006025	573.017	0.714	0.139	5.129	2.9e-07	5.8e-06	up	17	OSBPL7	47807372	47821834	oxysterol binding pr...	no	no	no	no
ENSG00000006282	3362.29	-0.655	0.139	-4.697	2.6e-06	4.1e-05	down	17	SPATA20	50543058	50555852	spermatogenesis asso...	no	no	no	no
ENSG00000006534	1923.66	-0.893	0.184	-4.85	1.2e-06	2.1e-05	down	11	ALDH3B1	68008578	68029282	aldehyde dehydrogena...	no	no	no	no
ENSG00000006740	199.477	-0.943	0.267	-3.529	0.00042	0.004	down	17	ARHGAP44	12789498	12991643	Rho GTPase activatin...	no	no	no	no
ENSG00000006747	459.949	-1.883	0.535	-3.522	0.00043	0.004	down	7	SCIN	12570577	12660182	scinderin [Source:HG...	no	no	no	no
ENSG00000006756	694.267	-0.59	0.168	-3.512	0.00044	0.004	down	X	ARSD	2903972	2929349	arylsulfatase D [Sou...	no	yes	no	no
ENSG00000007202	6660.66	-0.41	0.112	-3.674	0.00024	0.002	down	17	BLTP2	28614446	28645454	bridge-like lipid tr...	no	no	no	no
ENSG00000007372	68.359	4.56	0.831	5.485	4.1e-08	9.6e-07	up	11	PAX6	31784779	31817961	paired box 6 [Source...	no	no	no	no
ENSG00000007392	1978.51	0.328	0.101	3.253	0.001	0.008	up	16	LUC7L	188969	229463	LUC7 like [Source:HG...	no	no	no	no
ENSG00000008056	78.194	1.717	0.296	5.807	6.4e-09	1.8e-07	up	X	SYN1	47571901	47619857	synapsin I [Source:H...	no	no	no	yes
ENSG00000008083	756.301	0.456	0.104	4.394	1.1e-05	0.00015	up	6	JARID2	15246069	15522042	jumonji and AT-rich ...	no	no	no	no
ENSG00000008118	54.089	2.795	0.459	6.083	1.2e-09	3.8e-08	up	1	CAMK1G	209583714	209613939	calcium/calmodulin d...	no	no	no	no
ENSG00000008394	3201.66	-1.286	0.264	-4.872	1.1e-06	1.9e-05	down	12	MGST1	16347142	16609259	microsomal glutathio...	no	no	no	no
ENSG00000008517	67.875	3.217	0.547	5.885	4e-09	1.1e-07	up	16	IL32	3065297	3082192	interleukin 32 [Sour...	no	no	no	no
ENSG00000010704	1017.04	-0.38	0.111	-3.414	0.00064	0.005	down	6	HFE	26087281	26098343	homeostatic iron reg...	no	no	no	no
ENSG00000011201	262.809	8.585	1.885	4.553	5.3e-06	7.8e-05	up	X	ANOS1	8528874	8732137	anosmin 1 [Source:HG...	no	yes	no	no
ENSG00000011347	36.32	2.229	0.49	4.548	5.4e-06	7.9e-05	up	11	SYT7	61513714	61581148	synaptotagmin 7 [Sou...	no	no	no	no
ENSG00000012817	3485.91	1.177	0.128	9.202	3.5e-20	5.1e-18	up	Y	KDM5D	19703865	19744939	lysine demethylase 5...	no	no	no	no
ENSG00000013016	2427.22	0.738	0.19	3.879	0.00011	0.001	up	2	EHD3	31234152	31269451	EH domain containing...	no	no	no	no
ENSG00000013288	4592.62	-0.589	0.169	-3.486	0.00049	0.004	down	4	MAN2B2	6575189	6623362	mannosidase alpha cl...	no	no	no	no
ENSG00000013503	707.147	-0.453	0.136	-3.323	0.00089	0.007	down	12	POLR3B	106357748	106510198	RNA polymerase III s...	no	no	no	no
ENSG00000013583	1620.28	-0.816	0.208	-3.93	8.5e-05	0.0009	down	12	HEBP1	12974870	13000265	heme binding protein...	no	no	no	no
ENSG00000013588	183.344	1.544	0.193	7.993	1.3e-15	1e-13	up	12	GPRC5A	12891559	12917937	G protein-coupled re...	no	no	no	no
ENSG00000013619	2222.61	-0.792	0.184	-4.297	1.7e-05	0.00022	down	X	MAMLD1	150361422	150514178	mastermind like doma...	no	no	no	yes
ENSG00000016402	26.347	-2.626	0.437	-6.004	1.9e-09	5.9e-08	down	6	IL20RA	136999971	137045180	interleukin 20 recep...	no	no	no	no
ENSG00000018236	144.129	5.388	1.614	3.338	0.00084	0.006	up	12	CNTN1	40692439	41072415	contactin 1 [Source:...	no	no	no	no
ENSG00000018408	4700.97	0.705	0.129	5.461	4.7e-08	1.1e-06	up	3	WWTR1	149517235	149736714	WW domain containing...	no	no	no	no
ENSG00000018699	776.424	-0.497	0.143	-3.478	0.0005	0.004	down	2	TTC27	32628032	32821051	tetratricopeptide re...	no	no	no	no
ENSG00000019186	84.863	5.762	1.627	3.542	0.0004	0.003	up	20	CYP24A1	54153446	54173986	cytochrome P450 fami...	no	no	no	no
ENSG00000020633	671.515	0.898	0.261	3.44	0.00058	0.005	up	1	RUNX3	24899511	24965121	RUNX family transcri...	no	no	no	no
ENSG00000021776	2923.43	-0.477	0.115	-4.152	3.3e-05	0.00038	down	15	AQR	34851782	34969742	aquarius intron-bind...	no	no	no	no
ENSG00000023171	1329.82	-0.72	0.218	-3.305	0.00095	0.007	down	11	GRAMD1B	123358428	123627774	GRAM domain containi...	no	no	no	no
ENSG00000023191	12517.9	-0.807	0.206	-3.912	9.2e-05	0.00095	down	11	RNH1	494512	507300	ribonuclease/angioge...	no	no	no	no
ENSG00000023330	1611.38	-0.676	0.146	-4.617	3.9e-06	5.9e-05	down	3	ALAS1	52198086	52214327	5'-aminolevulinate s...	no	no	no	no
ENSG00000023445	58.424	1.63	0.315	5.174	2.3e-07	4.6e-06	up	11	BIRC3	102317450	102339403	baculoviral IAP repe...	no	no	no	no
ENSG00000023909	2245.37	-0.818	0.213	-3.848	0.00012	0.001	down	1	GCLM	93885199	93909456	glutamate-cysteine l...	no	no	no	no
ENSG00000026103	2023.15	-0.879	0.155	-5.659	1.5e-08	3.9e-07	down	10	FAS	88953813	89029605	Fas cell surface dea...	no	no	no	no
ENSG00000026559	530.388	1.407	0.223	6.313	2.7e-10	9.9e-09	up	20	KCNG1	51003656	51023107	potassium voltage-ga...	no	no	no	no
ENSG00000028137	317.554	-1.007	0.292	-3.446	0.00057	0.005	down	1	TNFRSF1B	12166991	12209228	TNF receptor superfa...	no	no	no	no
ENSG00000028277	589.16	1.539	0.136	11.345	7.9e-30	2.7e-27	up	19	POU2F2	42086110	42196585	POU class 2 homeobox...	no	no	no	no
ENSG00000030419	259.834	1.09	0.296	3.688	0.00023	0.002	up	2	IKZF2	212999691	213152427	IKAROS family zinc f...	no	no	no	no
ENSG00000031003	2475.05	-0.407	0.082	-4.953	7.3e-07	1.3e-05	down	5	FAM13B	137937960	138051961	family with sequence...	no	no	no	no
ENSG00000031691	265.577	-1.39	0.223	-6.224	4.8e-10	1.7e-08	down	6	CENPQ	49463370	49493107	centromere protein Q...	no	no	no	no
ENSG00000033327	735.038	-0.739	0.158	-4.675	2.9e-06	4.6e-05	down	11	GAB2	78215293	78418348	GRB2 associated bind...	no	no	no	no
ENSG00000034053	169.592	6.287	0.485	12.965	1.9e-38	1.2e-35	up	15	APBA2	28884483	29118315	amyloid beta precurs...	no	no	no	no
ENSG00000034152	6747.42	-0.84	0.204	-4.12	3.8e-05	0.00044	down	17	MAP2K3	21284672	21315232	mitogen-activated pr...	no	no	no	no
ENSG00000035862	70504.8	-0.44	0.131	-3.349	0.00081	0.006	down	17	TIMP2	78852977	78925387	TIMP metallopeptidas...	no	no	no	no
ENSG00000036448	56.078	1.511	0.218	6.934	4.1e-12	2e-10	up	8	MYOM2	2045046	2165552	myomesin 2 [Source:H...	no	no	no	no
ENSG00000039068	33.72	-1.91	0.437	-4.376	1.2e-05	0.00016	down	16	CDH1	68737292	68835537	cadherin 1 [Source:H...	no	no	no	no
ENSG00000039139	71.102	-0.702	0.153	-4.601	4.2e-06	6.3e-05	down	5	DNAH5	13690328	14011818	dynein axonemal heav...	no	no	no	no
ENSG00000039523	4276.95	-0.566	0.14	-4.058	5e-05	0.00055	down	16	RIPOR1	67518418	67546788	RHO family interacti...	no	no	no	no
ENSG00000039560	7854.45	0.452	0.141	3.215	0.001	0.009	up	5	RAI14	34656328	34832612	retinoic acid induce...	no	no	no	no
ENSG00000040199	1409.02	-0.441	0.072	-6.119	9.4e-10	3.1e-08	down	16	PHLPP2	71637835	71724701	PH domain and leucin...	no	no	no	no
ENSG00000041880	1691.31	-0.614	0.144	-4.261	2e-05	0.00025	down	3	PARP3	51942345	51948867	poly(ADP-ribose) pol...	no	no	no	no
ENSG00000041982	118461	2.107	0.179	11.773	5.4e-32	2.4e-29	up	9	TNC	115019575	115118207	tenascin C [Source:H...	no	no	no	no
ENSG00000042062	129.771	3.872	0.56	6.914	4.7e-12	2.3e-10	up	20	RIPOR3	50586108	50691542	RIPOR family member ...	no	no	no	no
ENSG00000043143	857.256	-0.798	0.162	-4.919	8.7e-07	1.6e-05	down	5	JADE2	134524312	134583230	jade family PHD fing...	no	no	no	no
ENSG00000044524	404.503	-2.129	0.597	-3.564	0.00036	0.003	down	3	EPHA3	89107621	89482134	EPH receptor A3 [Sou...	no	no	no	no
ENSG00000048540	24.643	-3.779	0.796	-4.749	2e-06	3.3e-05	down	12	LMO3	16548372	16610594	LIM domain only 3 [S...	no	no	no	no
ENSG00000048740	889.698	2.316	0.374	6.2	5.6e-10	1.9e-08	up	10	CELF2	10798397	11336675	CUGBP Elav-like fami...	no	no	no	no
ENSG00000048828	10051.1	-0.352	0.109	-3.239	0.001	0.009	down	9	FAM120A	93451685	93566112	family with sequence...	no	no	no	no
ENSG00000049089	276.607	-1.227	0.275	-4.463	8.1e-06	0.00011	down	1	COL9A2	40300489	40317813	collagen type IX alp...	no	no	no	no
ENSG00000049130	3893.18	-0.634	0.103	-6.15	7.8e-10	2.6e-08	down	12	KITLG	88492793	88580851	KIT ligand [Source:H...	no	no	no	no
ENSG00000049192	1211.73	1.283	0.21	6.101	1.1e-09	3.4e-08	up	5	ADAMTS6	65148738	65481920	ADAM metallopeptidas...	no	no	no	no
ENSG00000049540	37985.1	-2.362	0.27	-8.742	2.3e-18	2.7e-16	down	7	ELN	74027789	74069907	elastin [Source:HGNC...	no	no	no	no
ENSG00000049759	375.211	1.514	0.294	5.148	2.6e-07	5.3e-06	up	18	NEDD4L	58044226	58401540	NEDD4 like E3 ubiqui...	no	no	no	no
ENSG00000050165	30725.4	0.799	0.123	6.501	8e-11	3.2e-09	up	11	DKK3	11956207	12009769	dickkopf WNT signali...	no	no	no	no
ENSG00000050344	111.092	0.466	0.138	3.365	0.00077	0.006	up	7	NFE2L3	26152198	26187137	NFE2 like bZIP trans...	no	no	no	no
ENSG00000050767	219.959	7.426	2.115	3.511	0.00045	0.004	up	5	COL23A1	178237476	178590393	collagen type XXIII ...	no	no	no	no
ENSG00000053438	77.769	1.017	0.263	3.87	0.00011	0.001	up	20	NNAT	37521206	37523690	neuronatin [Source:H...	no	no	no	no
ENSG00000053747	137.609	-1.108	0.289	-3.836	0.00012	0.001	down	18	LAMA3	23689453	23956222	laminin subunit alph...	no	no	no	no
ENSG00000054282	1118.84	-0.673	0.203	-3.323	0.00089	0.007	down	1	SDCCAG8	243256034	243500091	SHH signaling and ci...	no	no	no	no
ENSG00000054598	499.452	1.203	0.25	4.823	1.4e-06	2.4e-05	up	6	FOXC1	1609915	1613897	forkhead box C1 [Sou...	no	no	no	no
ENSG00000055163	342.913	1.72	0.182	9.456	3.2e-21	5.8e-19	up	5	CYFIP2	157266079	157395595	cytoplasmic FMR1 int...	no	no	no	no
ENSG00000055813	487.424	-3.43	0.323	-10.61	2.7e-26	7.8e-24	down	2	CCDC85A	56183990	56386172	coiled-coil domain c...	no	no	no	no
ENSG00000056277	224.982	-0.366	0.112	-3.28	0.001	0.008	down	X	ZNF280C	130202707	130268899	zinc finger protein ...	no	no	yes	no
ENSG00000057252	3239.33	-0.707	0.157	-4.494	7e-06	9.9e-05	down	1	SOAT1	179293714	179358680	sterol O-acyltransfe...	no	no	no	no
ENSG00000058063	3591.16	-0.43	0.118	-3.631	0.00028	0.003	down	3	ATP11B	182793503	182921629	ATPase phospholipid ...	no	no	no	no
ENSG00000059378	532.7	0.75	0.234	3.202	0.001	0.01	up	7	PARP12	140023749	140062951	poly(ADP-ribose) pol...	no	no	no	no
ENSG00000060140	46.94	-1.646	0.274	-6.003	1.9e-09	5.9e-08	down	12	STYK1	10618923	10674318	serine/threonine/tyr...	no	no	no	no
ENSG00000060762	722.739	-0.53	0.123	-4.319	1.6e-05	0.0002	down	6	MPC1	166364919	166383013	mitochondrial pyruva...	no	no	no	no
ENSG00000061656	206.696	0.779	0.203	3.833	0.00013	0.001	up	20	SPAG4	35615829	35621094	sperm associated ant...	no	no	no	no
ENSG00000061918	117.055	0.9	0.225	3.995	6.5e-05	0.0007	up	4	GUCY1B1	155758992	155807811	guanylate cyclase 1 ...	no	no	no	no
ENSG00000062524	154.867	2.292	0.43	5.331	9.8e-08	2.1e-06	up	15	LTK	41503637	41513887	leukocyte receptor t...	no	no	no	no
ENSG00000062716	9445.01	0.933	0.135	6.894	5.4e-12	2.6e-10	up	17	VMP1	59707192	59842255	vacuole membrane pro...	no	no	no	no
ENSG00000063660	12666.3	-1.342	0.177	-7.595	3.1e-14	2.1e-12	down	2	GPC1	240435663	240468076	glypican 1 [Source:H...	no	no	no	no
ENSG00000064012	590.159	-0.326	0.088	-3.705	0.00021	0.002	down	2	CASP8	201233443	201361836	caspase 8 [Source:HG...	no	no	no	no
ENSG00000064042	1044.66	-1.93	0.271	-7.111	1.2e-12	6.2e-11	down	4	LIMCH1	41359607	41700044	LIM and calponin hom...	no	no	no	no
ENSG00000064115	1907.12	-0.614	0.074	-8.241	1.7e-16	1.5e-14	down	12	TM7SF3	26971579	27014434	transmembrane 7 supe...	no	no	no	no
ENSG00000064309	606.48	1.936	0.332	5.837	5.3e-09	1.5e-07	up	11	CDON	125955796	126063335	cell adhesion associ...	no	no	no	no
ENSG00000064687	184.499	-1.715	0.258	-6.645	3e-11	1.3e-09	down	19	ABCA7	1039997	1065572	ATP binding cassette...	no	no	no	no
ENSG00000064692	70.461	1.854	0.307	6.035	1.6e-09	5e-08	up	5	SNCAIP	122311354	122464219	synuclein alpha inte...	no	no	no	no
ENSG00000064763	339.417	1.454	0.299	4.869	1.1e-06	2e-05	up	12	FAR2	29149016	29341121	fatty acyl-CoA reduc...	no	no	no	no
ENSG00000064787	41.296	2.731	0.74	3.693	0.00022	0.002	up	20	BCAS1	53936777	54070594	brain enriched myeli...	no	no	no	no
ENSG00000065154	6829.22	-0.211	0.047	-4.478	7.5e-06	0.00011	down	10	OAT	124397303	124418976	ornithine aminotrans...	no	no	no	no
ENSG00000065320	182.016	3.458	0.536	6.452	1.1e-10	4.3e-09	up	17	NTN1	9021510	9244000	netrin 1 [Source:HGN...	no	no	no	no
ENSG00000065413	634.622	-0.939	0.234	-4.013	6e-05	0.00066	down	2	ANKRD44	196967017	197311173	ankyrin repeat domai...	no	no	no	no
ENSG00000065534	16186.1	-0.573	0.168	-3.404	0.00066	0.005	down	3	MYLK	123610049	123884332	myosin light chain k...	no	no	no	no
ENSG00000065989	1534.41	-0.451	0.113	-4.003	6.3e-05	0.00069	down	19	PDE4A	10416773	10469630	phosphodiesterase 4A...	no	no	no	no
ENSG00000066629	2168.56	0.705	0.197	3.578	0.00035	0.003	up	14	EML1	99737693	99942060	EMAP like 1 [Source:...	no	no	no	no
ENSG00000066777	3027.54	-0.351	0.07	-5.006	5.6e-07	1e-05	down	8	ARFGEF1	67173511	67343781	ADP ribosylation fac...	no	no	no	no
ENSG00000067048	6154.74	1.211	0.153	7.928	2.2e-15	1.7e-13	up	Y	DDX3Y	12904108	12920478	DEAD-box helicase 3 ...	no	no	no	no
ENSG00000067113	2255.21	-0.779	0.233	-3.337	0.00085	0.006	down	5	PLPP1	55424854	55534969	phospholipid phospha...	no	no	no	no
ENSG00000067141	4550.05	-1.473	0.227	-6.491	8.5e-11	3.4e-09	down	15	NEO1	73051710	73305205	neogenin 1 [Source:H...	no	no	no	no
ENSG00000067177	427.686	1.376	0.23	5.98	2.2e-09	6.7e-08	up	X	PHKA1	72578814	72714319	phosphorylase kinase...	no	no	no	yes
ENSG00000067221	859.209	-0.478	0.147	-3.26	0.001	0.008	down	15	STOML1	73978926	73994622	stomatin like 1 [Sou...	no	no	no	no
ENSG00000067445	1419.97	1.052	0.169	6.207	5.4e-10	1.9e-08	up	X	TRO	54920462	54931431	trophinin [Source:HG...	no	no	no	yes
ENSG00000067646	1499.47	0.848	0.145	5.853	4.8e-09	1.4e-07	up	Y	ZFY	2935281	2982506	zinc finger protein ...	no	no	no	no
ENSG00000067715	54.018	-2.716	0.56	-4.849	1.2e-06	2.1e-05	down	12	SYT1	78863993	79452008	synaptotagmin 1 [Sou...	no	no	no	no
ENSG00000067798	2161.46	-1.456	0.165	-8.816	1.2e-18	1.5e-16	down	12	NAV3	77324641	78213010	neuron navigator 3 [...	no	no	no	no
ENSG00000067955	2977.61	-0.603	0.173	-3.485	0.00049	0.004	down	16	CBFB	67028984	67101058	core-binding factor ...	no	no	no	no
ENSG00000067992	253.958	0.897	0.165	5.426	5.8e-08	1.3e-06	up	X	PDK3	24465244	24550466	pyruvate dehydrogena...	no	no	no	yes
ENSG00000068305	3059.18	-0.401	0.069	-5.79	7e-09	1.9e-07	down	15	MEF2A	99565417	99716488	myocyte enhancer fac...	no	no	no	no
ENSG00000068489	1764.3	0.904	0.235	3.838	0.00012	0.001	up	17	PRR11	59155732	59206709	proline rich 11 [Sou...	no	no	no	no
ENSG00000069011	98.141	4.697	0.801	5.867	4.4e-09	1.3e-07	up	5	PITX1	135027734	135034813	paired like homeodom...	no	no	no	no
ENSG00000069122	27.289	-4.287	1.119	-3.83	0.00013	0.001	down	6	ADGRF5	46852522	46954943	adhesion G protein-c...	no	no	no	no
ENSG00000069399	826.499	0.73	0.19	3.85	0.00012	0.001	up	19	BCL3	44747705	44760044	BCL3 transcription c...	no	no	no	no
ENSG00000069431	393.967	-1.389	0.27	-5.142	2.7e-07	5.4e-06	down	12	ABCC9	21797389	21942543	ATP binding cassette...	no	no	no	no
ENSG00000069482	37.152	4.035	0.599	6.736	1.6e-11	7.3e-10	up	11	GAL	68683779	68691175	galanin and GMAP pre...	no	no	no	no
ENSG00000069667	878.251	0.528	0.133	3.954	7.7e-05	0.00082	up	15	RORA	60488284	61229302	RAR related orphan r...	no	no	no	no
ENSG00000069943	380.701	-0.402	0.065	-6.2	5.6e-10	1.9e-08	down	15	PIGB	55318960	55355648	phosphatidylinositol...	no	no	no	no
ENSG00000069998	1220.4	0.462	0.107	4.335	1.5e-05	0.00019	up	22	HDHD5	17137511	17165287	haloacid dehalogenas...	no	no	no	no
ENSG00000070961	4265.67	-1.603	0.184	-8.73	2.5e-18	3e-16	down	12	ATP2B1	89588049	89709366	ATPase plasma membra...	no	no	no	no
ENSG00000071246	424.849	0.999	0.234	4.267	2e-05	0.00024	up	14	VASH1	76761468	76783015	vasohibin 1 [Source:...	no	no	no	no
ENSG00000071282	2338.55	-1.311	0.233	-5.63	1.8e-08	4.5e-07	down	3	LMCD1	8501807	8574668	LIM and cysteine ric...	no	no	no	no
ENSG00000071967	16180.4	-0.706	0.2	-3.534	0.00041	0.004	down	2	CYBRD1	171522247	171558129	cytochrome b reducta...	no	no	no	no
ENSG00000072195	6064.12	1.001	0.176	5.681	1.3e-08	3.5e-07	up	2	SPEG	219434843	219493629	striated muscle enri...	no	no	no	no
ENSG00000072274	6504.34	-0.613	0.107	-5.752	8.8e-09	2.4e-07	down	3	TFRC	196012511	196082153	transferrin receptor...	no	no	no	no
ENSG00000072657	1372.27	13.059	0.786	16.624	4.7e-62	1.5e-58	up	12	TRHDE	72087266	72670758	thyrotropin releasin...	no	no	no	no
ENSG00000072952	2402.92	-1.18	0.259	-4.559	5.1e-06	7.6e-05	down	11	IRAG1	10573091	10693988	inositol 1,4,5-triph...	no	no	no	no
ENSG00000073111	1070.72	-0.67	0.204	-3.287	0.001	0.007	down	3	MCM2	127598410	127622436	minichromosome maint...	no	no	no	no
ENSG00000073146	59.826	2.877	0.568	5.066	4.1e-07	7.8e-06	up	22	MOV10L1	50089879	50161690	Mov10 like RISC comp...	no	no	no	no
ENSG00000073150	63.445	-1.085	0.204	-5.314	1.1e-07	2.3e-06	down	22	PANX2	50170731	50180295	pannexin 2 [Source:H...	no	no	no	no
ENSG00000073464	117.291	1.027	0.274	3.749	0.00018	0.002	up	X	CLCN4	10156975	10237660	chloride voltage-gat...	no	no	no	yes
ENSG00000073756	2183.86	1.849	0.281	6.586	4.5e-11	1.9e-09	up	1	PTGS2	186671791	186680922	prostaglandin-endope...	no	no	no	no
ENSG00000074416	6681.26	-0.436	0.087	-4.982	6.3e-07	1.2e-05	down	3	MGLL	127689062	128052190	monoglyceride lipase...	no	no	no	no
ENSG00000074527	6391.52	3.37	0.638	5.283	1.3e-07	2.7e-06	up	12	NTN4	95657807	95791189	netrin 4 [Source:HGN...	no	no	no	no
ENSG00000075131	288.979	-0.698	0.205	-3.411	0.00065	0.005	down	15	TIPIN	66336191	66386746	TIMELESS interacting...	no	no	no	no
ENSG00000075275	112.811	3.65	0.5	7.301	2.9e-13	1.7e-11	up	22	CELSR1	46360834	46537620	cadherin EGF LAG sev...	no	no	no	no
ENSG00000075651	305.664	1.078	0.214	5.027	5e-07	9.4e-06	up	3	PLD1	171600404	171810950	phospholipase D1 [So...	no	no	no	no
ENSG00000076003	2274.15	-0.656	0.188	-3.485	0.00049	0.004	down	2	MCM6	135839626	135876443	minichromosome maint...	no	no	no	no
ENSG00000076067	3901.14	0.231	0.067	3.432	0.0006	0.005	up	12	RBMS2	56521820	56596193	RNA binding motif si...	no	no	no	no
ENSG00000076248	1131.8	-0.671	0.159	-4.214	2.5e-05	0.0003	down	12	UNG	109097597	109126725	uracil DNA glycosyla...	no	no	no	no
ENSG00000076344	122.198	-1.753	0.233	-7.542	4.6e-14	3.1e-12	down	16	RGS11	268301	275980	regulator of G prote...	no	no	no	no
ENSG00000076351	135.014	-0.74	0.172	-4.296	1.7e-05	0.00022	down	17	SLC46A1	28394642	28407197	solute carrier famil...	no	no	no	no
ENSG00000077150	1323.3	0.5	0.154	3.243	0.001	0.008	up	10	NFKB2	102394110	102402524	nuclear factor kappa...	no	no	no	no
ENSG00000077157	1153.47	-1.129	0.257	-4.392	1.1e-05	0.00015	down	1	PPP1R12B	202348699	202592706	protein phosphatase ...	no	no	no	no
ENSG00000077514	826.742	-0.468	0.135	-3.479	0.0005	0.004	down	11	POLD3	74493851	74669117	DNA polymerase delta...	no	no	no	no
ENSG00000077713	1723.85	-0.509	0.095	-5.378	7.5e-08	1.6e-06	down	X	SLC25A43	119399336	119454478	solute carrier famil...	no	no	no	yes
ENSG00000077942	14916.9	0.864	0.256	3.375	0.00074	0.006	up	22	FBLN1	45502238	45601135	fibulin 1 [Source:HG...	no	no	no	no
ENSG00000078018	238.903	2.766	0.205	13.474	2.2e-41	1.8e-38	up	2	MAP2	209424047	209734147	microtubule associat...	no	no	no	no
ENSG00000078070	658.747	-0.705	0.151	-4.68	2.9e-06	4.5e-05	down	3	MCCC1	183015218	183116075	methylcrotonyl-CoA c...	no	no	no	no
ENSG00000078142	1963.48	0.315	0.068	4.661	3.1e-06	4.9e-05	up	18	PIK3C3	41955234	42087830	phosphatidylinositol...	no	no	no	no
ENSG00000078237	277.289	-0.668	0.136	-4.915	8.9e-07	1.6e-05	down	12	TIGAR	4307763	4360028	TP53 induced glycoly...	no	no	no	no
ENSG00000078401	783.254	-1.203	0.181	-6.655	2.8e-11	1.2e-09	down	6	EDN1	12290361	12297194	endothelin 1 [Source...	no	no	no	no
ENSG00000078687	604.152	-0.483	0.125	-3.866	0.00011	0.001	down	17	TNRC6C	77958703	78108822	trinucleotide repeat...	no	no	no	no
ENSG00000079257	169.313	1.427	0.286	4.99	6e-07	1.1e-05	up	3	LXN	158645822	158672648	latexin [Source:HGNC...	no	no	no	no
ENSG00000079841	489.866	-4.265	0.293	-14.563	4.8e-48	5.3e-45	down	6	RIMS1	71886550	72403150	regulating synaptic ...	no	no	no	no
ENSG00000080493	1076.37	-0.916	0.228	-4.018	5.9e-05	0.00065	down	4	SLC4A4	71062667	71572087	solute carrier famil...	no	no	no	no
ENSG00000080546	653.201	-0.621	0.124	-4.997	5.8e-07	1.1e-05	down	6	SESN1	108984309	109094846	sestrin 1 [Source:HG...	no	no	no	no
ENSG00000080839	705.417	-0.692	0.202	-3.421	0.00062	0.005	down	20	RBL1	36996349	37095997	RB transcriptional c...	no	no	no	no
ENSG00000080854	63.226	4.941	0.85	5.813	6.1e-09	1.7e-07	up	11	IGSF9B	133896438	133956968	immunoglobulin super...	no	no	no	no
ENSG00000081087	2006.63	-0.728	0.151	-4.826	1.4e-06	2.3e-05	down	6	OSTM1	108029245	108165854	osteoclastogenesis a...	no	no	no	no
ENSG00000081277	111.225	1.486	0.448	3.313	0.00092	0.007	up	1	PKP1	201283452	201332993	plakophilin 1 [Sourc...	no	no	no	no
ENSG00000081377	1558.58	-1.017	0.247	-4.112	3.9e-05	0.00045	down	9	CDC14B	96490241	96619843	cell division cycle ...	no	no	no	no
ENSG00000082126	107.63	1.277	0.198	6.465	1e-10	4e-09	up	2	MPP4	201644870	201698694	MAGUK p55 scaffold p...	no	no	no	no
ENSG00000082213	905.159	-0.588	0.161	-3.661	0.00025	0.002	down	5	C5orf22	31532287	31555053	chromosome 5 open re...	no	no	no	no
ENSG00000082438	1302.26	-1.956	0.22	-8.909	5.2e-19	6.7e-17	down	2	COBLL1	164653624	164843679	cordon-bleu WH2 repe...	no	no	no	no
ENSG00000082497	237.573	1.302	0.309	4.211	2.5e-05	0.0003	up	1	SERTAD4	210232796	210246631	SERTA domain contain...	no	no	no	no
ENSG00000083312	9059.45	-0.446	0.129	-3.45	0.00056	0.005	down	5	TNPO1	72816312	72916733	transportin 1 [Sourc...	no	no	no	no
ENSG00000083720	2068.96	-0.844	0.174	-4.853	1.2e-06	2.1e-05	down	5	OXCT1	41730065	41870425	3-oxoacid CoA-transf...	no	no	no	no
ENSG00000083828	279.134	0.353	0.108	3.273	0.001	0.008	up	19	ZNF586	57769655	57819939	zinc finger protein ...	no	no	no	no
ENSG00000084073	3662.36	-0.464	0.091	-5.119	3.1e-07	6.1e-06	down	1	ZMPSTE24	40258041	40294180	zinc metallopeptidas...	no	no	no	no
ENSG00000084112	8048.99	0.36	0.084	4.309	1.6e-05	0.00021	up	12	SSH1	108778191	108857590	slingshot protein ph...	no	no	no	no
ENSG00000084234	47727.3	-0.854	0.186	-4.597	4.3e-06	6.4e-05	down	11	APLP2	130068147	130144811	amyloid beta precurs...	no	no	no	no
ENSG00000084636	25302.7	-0.424	0.13	-3.27	0.001	0.008	down	1	COL16A1	31652263	31704319	collagen type XVI al...	no	no	no	no
ENSG00000084710	142.227	-1.043	0.278	-3.748	0.00018	0.002	down	2	EFR3B	25042076	25159135	EFR3 homolog B [Sour...	no	no	no	no
ENSG00000085276	125.694	2.558	0.382	6.698	2.1e-11	9.3e-10	up	3	MECOM	169083499	169663775	MDS1 and EVI1 comple...	no	no	no	no
ENSG00000085871	123.194	1.283	0.222	5.782	7.4e-09	2e-07	up	4	MGST2	139665768	139740745	microsomal glutathio...	no	no	no	no
ENSG00000086289	1532.02	-1.186	0.317	-3.748	0.00018	0.002	down	7	EPDR1	37920640	37951936	ependymin related 1 ...	no	no	no	no
ENSG00000086570	38.616	-1.218	0.336	-3.624	0.00029	0.003	down	5	FAT2	151504092	151591331	FAT atypical cadheri...	no	no	no	no
ENSG00000086991	112.179	2.455	0.221	11.117	1e-28	3.4e-26	up	11	NOX4	89324353	89498187	NADPH oxidase 4 [Sou...	no	no	no	no
ENSG00000087076	343.226	-1.817	0.325	-5.587	2.3e-08	5.6e-07	down	19	HSD17B14	48813018	48836510	hydroxysteroid 17-be...	no	no	no	no
ENSG00000087510	745.053	0.703	0.179	3.928	8.6e-05	0.0009	up	20	TFAP2C	56629306	56639283	transcription factor...	no	no	no	no
ENSG00000087842	160.601	-1.322	0.234	-5.653	1.6e-08	4e-07	down	X	PIR	15384799	15493564	pirin [Source:HGNC S...	no	no	yes	no
ENSG00000088340	454.312	0.9	0.27	3.332	0.00086	0.006	up	20	FER1L4	35558737	35607562	fer-1 like family me...	no	no	no	no
ENSG00000088756	182.695	2.397	0.394	6.083	1.2e-09	3.8e-08	up	18	ARHGAP28	6729716	6915716	Rho GTPase activatin...	no	no	no	no
ENSG00000088826	587.731	0.803	0.15	5.354	8.6e-08	1.9e-06	up	20	SMOX	4120980	4187747	spermine oxidase [So...	no	no	no	no
ENSG00000088836	64.253	-1.079	0.263	-4.101	4.1e-05	0.00047	down	20	SLC4A11	3227417	3239559	solute carrier famil...	no	no	no	no
ENSG00000088881	81.989	3.413	0.382	8.943	3.8e-19	5.1e-17	up	20	EBF4	2692780	2760108	EBF family member 4 ...	no	no	no	no
ENSG00000088882	244.46	2.161	0.318	6.808	9.9e-12	4.6e-10	up	20	CPXM1	2794074	2800627	carboxypeptidase X, ...	no	no	no	no
ENSG00000089057	1410.21	-0.567	0.149	-3.794	0.00015	0.001	down	20	SLC23A2	4852356	5010293	solute carrier famil...	no	no	no	no
ENSG00000089063	4513.77	-0.333	0.075	-4.408	1e-05	0.00014	down	20	TMEM230	5068232	5113103	transmembrane protei...	no	no	no	no
ENSG00000090376	469.674	-1.621	0.275	-5.883	4e-09	1.2e-07	down	12	IRAK3	66189195	66254622	interleukin 1 recept...	no	no	no	no
ENSG00000090539	82.984	1.173	0.262	4.474	7.7e-06	0.00011	up	3	CHRD	184380054	184390736	chordin [Source:HGNC...	no	no	no	no
ENSG00000090612	746.773	-0.341	0.099	-3.443	0.00058	0.005	down	12	ZNF268	133181409	133214832	zinc finger protein ...	no	no	no	no
ENSG00000090674	873.217	-0.947	0.242	-3.919	8.9e-05	0.00093	down	19	MCOLN1	7522624	7534009	mucolipin TRP cation...	no	no	no	no
ENSG00000090971	671.63	0.504	0.147	3.429	0.00061	0.005	up	19	NAT14	55485188	55487568	N-acetyltransferase ...	no	no	no	no
ENSG00000091127	882.827	0.382	0.101	3.776	0.00016	0.002	up	7	PUS7	105439661	105522271	pseudouridine syntha...	no	no	no	no
ENSG00000091409	2601.47	-1.195	0.272	-4.396	1.1e-05	0.00015	down	2	ITGA6	172427354	172506459	integrin subunit alp...	no	no	no	no
ENSG00000091490	3359.24	-0.534	0.154	-3.463	0.00053	0.004	down	4	SEL1L3	25747433	25863760	SEL1L family member ...	no	no	no	no
ENSG00000091622	776.334	2.556	0.369	6.931	4.2e-12	2e-10	up	17	PITPNM3	6451263	6556555	PITPNM family member...	no	no	no	no
ENSG00000092068	1866.65	-1.394	0.43	-3.243	0.001	0.008	down	14	SLC7A8	23125295	23183674	solute carrier famil...	no	no	no	no
ENSG00000092439	3503.38	-0.396	0.124	-3.197	0.001	0.01	down	15	TRPM7	50552473	50686797	transient receptor p...	no	no	no	no
ENSG00000092470	656.333	-0.721	0.22	-3.28	0.001	0.008	down	15	WDR76	43826980	43868412	WD repeat domain 76 ...	no	no	no	no
ENSG00000092931	815.38	-0.396	0.062	-6.413	1.4e-10	5.5e-09	down	17	MFSD11	76735865	76781449	major facilitator su...	no	no	no	no
ENSG00000093072	181.697	-1.765	0.189	-9.358	8.1e-21	1.3e-18	down	22	ADA2	17178790	17258235	adenosine deaminase ...	no	no	no	no
ENSG00000093217	356.756	-0.767	0.189	-4.056	5e-05	0.00056	down	3	XYLB	38346760	38421348	xylulokinase [Source...	no	no	no	no
ENSG00000095203	82.19	-1.648	0.302	-5.454	4.9e-08	1.1e-06	down	9	EPB41L4B	109171974	109321059	erythrocyte membrane...	no	no	no	no
ENSG00000095209	289.441	-0.951	0.186	-5.111	3.2e-07	6.3e-06	down	9	TMEM38B	105694541	105776629	transmembrane protei...	no	no	no	no
ENSG00000095383	1247.5	-0.676	0.108	-6.278	3.4e-10	1.2e-08	down	9	TBC1D2	98199011	98255649	TBC1 domain family m...	no	no	no	no
ENSG00000095397	270.185	0.934	0.287	3.257	0.001	0.008	up	9	WHRN	114402080	114505473	whirlin [Source:HGNC...	no	no	no	no
ENSG00000095637	43.818	-1.109	0.277	-3.997	6.4e-05	0.0007	down	10	SORBS1	95311771	95561414	sorbin and SH3 domai...	no	no	no	no
ENSG00000095739	381.847	-1.097	0.158	-6.931	4.2e-12	2e-10	down	10	BAMBI	28677510	28682932	BMP and activin memb...	no	no	no	no
ENSG00000095752	641.573	1.273	0.18	7.069	1.6e-12	8.3e-11	up	19	IL11	55364382	55370463	interleukin 11 [Sour...	no	no	no	no
ENSG00000096060	482.827	-1.267	0.303	-4.178	2.9e-05	0.00035	down	6	FKBP5	35573585	35728583	FKBP prolyl isomeras...	no	no	no	no
ENSG00000096433	3885.85	-1.129	0.169	-6.7	2.1e-11	9.2e-10	down	6	ITPR3	33620365	33696574	inositol 1,4,5-trisp...	no	no	no	no
ENSG00000099194	9433.78	0.687	0.157	4.366	1.3e-05	0.00017	up	10	SCD	100347233	100364826	stearoyl-CoA desatur...	no	no	no	no
ENSG00000099204	1186.66	2.54	0.414	6.136	8.5e-10	2.8e-08	up	10	ABLIM1	114431112	114768061	actin binding LIM pr...	no	no	no	no
ENSG00000099260	202.621	1.961	0.435	4.508	6.5e-06	9.3e-05	up	1	PALMD	99646113	99694541	palmdelphin [Source:...	no	no	no	no
ENSG00000099337	1424.48	-1.032	0.228	-4.533	5.8e-06	8.4e-05	down	19	KCNK6	38319845	38332076	potassium two pore d...	no	no	no	no
ENSG00000099365	443.103	1.12	0.243	4.616	3.9e-06	5.9e-05	up	16	STX1B	30989256	31010638	syntaxin 1B [Source:...	no	no	no	no
ENSG00000099725	2447.37	1.751	0.197	8.901	5.5e-19	7.1e-17	up	Y	PRKY	7273972	7381548	protein kinase Y-lin...	no	no	no	no
ENSG00000099864	185.725	4.29	0.623	6.891	5.5e-12	2.6e-10	up	19	PALM	708935	748329	paralemmin [Source:H...	no	no	no	no
ENSG00000099889	283.924	-3.153	0.27	-11.665	1.9e-31	7.5e-29	down	22	ARVCF	19969896	20016823	ARVCF delta catenin ...	no	no	no	no
ENSG00000099998	132.394	3.762	0.591	6.367	1.9e-10	7.2e-09	up	22	GGT5	24219654	24245108	gamma-glutamyltransf...	no	no	no	no
ENSG00000100034	2268.65	-0.453	0.117	-3.879	0.0001	0.001	down	22	PPM1F	21919425	21952848	protein phosphatase,...	no	no	no	no
ENSG00000100065	320.232	1.533	0.271	5.66	1.5e-08	3.9e-07	up	22	CARD10	37490362	37519542	caspase recruitment ...	no	no	no	no
ENSG00000100077	55.682	1.483	0.357	4.149	3.3e-05	0.00039	up	22	GRK3	25564675	25729294	G protein-coupled re...	no	no	no	no
ENSG00000100100	414.208	-0.766	0.238	-3.224	0.001	0.009	down	22	PIK3IP1	31281594	31292534	phosphoinositide-3-k...	no	no	no	no
ENSG00000100181	33.535	8.117	1.114	7.285	3.2e-13	1.9e-11	up	22	TPTEP1	16637040	16638740	TPTE pseudogene 1 [S...	no	no	no	no
ENSG00000100234	44874	-1.728	0.221	-7.817	5.4e-15	3.9e-13	down	22	TIMP3	32801705	32863041	TIMP metallopeptidas...	no	no	no	no
ENSG00000100285	135.289	1.527	0.416	3.666	0.00025	0.002	up	22	NEFH	29480218	29491390	neurofilament heavy ...	no	no	no	no
ENSG00000100292	11718.8	-1.889	0.344	-5.497	3.9e-08	9e-07	down	22	HMOX1	35380361	35394214	heme oxygenase 1 [So...	no	no	no	no
ENSG00000100300	5518.87	-0.62	0.163	-3.805	0.00014	0.001	down	22	TSPO	43151547	43163242	translocator protein...	no	no	no	no
ENSG00000100302	575.223	-2.296	0.305	-7.526	5.2e-14	3.4e-12	down	22	RASD2	35540831	35553999	RASD family member 2...	no	no	no	no
ENSG00000100439	1891.18	-0.759	0.206	-3.68	0.00023	0.002	down	14	ABHD4	22598290	22612963	abhydrolase domain c...	no	no	no	no
ENSG00000100445	254.61	0.551	0.143	3.848	0.00012	0.001	up	14	SDR39U1	24439766	24442905	short chain dehydrog...	no	no	no	no
ENSG00000100490	308.922	-1.644	0.26	-6.31	2.8e-10	1e-08	down	14	CDKL1	50326265	50416461	cyclin dependent kin...	no	no	no	no
ENSG00000100558	395.778	-0.959	0.266	-3.601	0.00032	0.003	down	14	PLEK2	67386984	67412167	pleckstrin 2 [Source...	no	no	no	no
ENSG00000100605	1148.78	-0.697	0.084	-8.309	9.7e-17	9e-15	down	14	ITPK1	92936914	93116320	inositol-tetrakispho...	no	no	no	no
ENSG00000100625	535.395	1.334	0.17	7.828	5e-15	3.6e-13	up	14	SIX4	60709539	60724351	SIX homeobox 4 [Sour...	no	no	no	no
ENSG00000100714	2673.77	-0.816	0.187	-4.365	1.3e-05	0.00017	down	14	MTHFD1	64388031	64463457	methylenetetrahydrof...	no	no	no	no
ENSG00000100889	3337.13	0.908	0.229	3.968	7.2e-05	0.00078	up	14	PCK2	24094053	24110598	phosphoenolpyruvate ...	no	no	no	no
ENSG00000100918	232.62	0.825	0.236	3.498	0.00047	0.004	up	14	REC8	24171853	24180257	REC8 meiotic recombi...	no	no	no	no
ENSG00000101000	527.492	-0.884	0.134	-6.593	4.3e-11	1.8e-09	down	20	PROCR	35172072	35216240	protein C receptor [...	no	no	no	no
ENSG00000101096	106.066	1.654	0.187	8.841	9.5e-19	1.2e-16	up	20	NFATC2	51386957	51562831	nuclear factor of ac...	no	no	no	no
ENSG00000101115	46.84	6.584	0.859	7.664	1.8e-14	1.2e-12	up	20	SALL4	51782331	51802521	spalt like transcrip...	no	no	no	no
ENSG00000101134	915.278	-0.838	0.229	-3.667	0.00025	0.002	down	20	DOK5	54475593	54651169	docking protein 5 [S...	no	no	no	no
ENSG00000101220	1092.39	-0.525	0.135	-3.896	9.8e-05	0.001	down	20	C20orf27	3753508	3767781	chromosome 20 open r...	no	no	no	no
ENSG00000101417	410.975	-0.454	0.097	-4.671	3e-06	4.7e-05	down	20	PXMP4	33702758	33720319	peroxisomal membrane...	no	no	no	no
ENSG00000101463	302.305	-0.828	0.161	-5.131	2.9e-07	5.7e-06	down	20	SYNDIG1	24469629	24666616	synapse differentiat...	no	no	no	no
ENSG00000101605	52.013	1.48	0.375	3.942	8.1e-05	0.00086	up	18	MYOM1	3066807	3219968	myomesin 1 [Source:H...	no	no	no	no
ENSG00000101670	231.779	6.4	0.741	8.632	6e-18	6.7e-16	up	18	LIPG	49560699	49599185	lipase G, endothelia...	no	no	no	no
ENSG00000101680	289.924	-0.872	0.27	-3.225	0.001	0.009	down	18	LAMA1	6941742	7117797	laminin subunit alph...	no	no	no	no
ENSG00000101773	1205.3	-0.674	0.195	-3.455	0.00055	0.004	down	18	RBBP8	22798261	23026488	RB binding protein 8...	no	no	no	no
ENSG00000101846	1390.45	-1.013	0.125	-8.117	4.8e-16	3.9e-14	down	X	STS	7147237	7804358	steroid sulfatase [S...	no	yes	no	no
ENSG00000101871	878.488	-0.968	0.246	-3.936	8.3e-05	0.00088	down	X	MID1	10445310	10833654	midline 1 [Source:HG...	no	no	no	yes
ENSG00000102032	160.981	-2.223	0.358	-6.215	5.1e-10	1.8e-08	down	X	RENBP	153935269	153944687	renin binding protei...	no	yes	no	no
ENSG00000102057	290.674	1.275	0.228	5.587	2.3e-08	5.6e-07	up	X	KCND1	48961378	48971844	potassium voltage-ga...	no	no	no	yes
ENSG00000102144	29140.3	0.644	0.15	4.309	1.6e-05	0.00021	up	X	PGK1	77910739	78129295	phosphoglycerate kin...	no	no	no	yes
ENSG00000102174	70.209	2.058	0.36	5.716	1.1e-08	2.9e-07	up	X	PHEX	22032325	22494713	phosphate regulating...	no	no	yes	no
ENSG00000102218	1465.78	-0.407	0.123	-3.302	0.00096	0.007	down	X	RP2	46837043	46882358	RP2 activator of ARL...	no	no	no	yes
ENSG00000102359	1494.6	0.809	0.133	6.063	1.3e-09	4.2e-08	up	X	SRPX2	100644195	100675788	sushi repeat contain...	no	no	yes	no
ENSG00000102409	610.51	1.175	0.289	4.064	4.8e-05	0.00054	up	X	BEX4	103215108	103217246	brain expressed X-li...	no	no	no	yes
ENSG00000102445	174.074	3.848	0.205	18.733	2.7e-78	1.8e-74	up	13	RUBCNL	46334681	46438190	rubicon like autopha...	no	no	no	no
ENSG00000102452	206.353	-1.03	0.141	-7.308	2.7e-13	1.6e-11	down	13	NALCN	101053776	101416508	sodium leak channel,...	no	no	no	no
ENSG00000102466	466.745	-0.666	0.185	-3.599	0.00032	0.003	down	13	FGF14	101710804	102402457	fibroblast growth fa...	no	no	no	no
ENSG00000102468	127.31	-1.511	0.452	-3.342	0.00083	0.006	down	13	HTR2A	46831546	46897076	5-hydroxytryptamine ...	no	no	no	no
ENSG00000102575	247.122	-1.942	0.31	-6.264	3.8e-10	1.3e-08	down	19	ACP5	11574653	11579993	acid phosphatase 5, ...	no	no	no	no
ENSG00000102580	3295.62	-0.222	0.064	-3.478	0.0005	0.004	down	13	DNAJC3	95677139	95794988	DnaJ heat shock prot...	no	no	no	no
ENSG00000102755	882.731	3.405	0.551	6.182	6.3e-10	2.1e-08	up	13	FLT1	28300346	28495145	fms related receptor...	no	no	no	no
ENSG00000102802	1164.96	0.783	0.142	5.517	3.4e-08	8.1e-07	up	13	MEDAG	30906271	30925572	mesenteric estrogen ...	no	no	no	no
ENSG00000102878	230.697	-0.821	0.242	-3.398	0.00068	0.005	down	16	HSF4	67164681	67169945	heat shock transcrip...	no	no	no	no
ENSG00000102882	2873.24	-0.568	0.169	-3.355	0.00079	0.006	down	16	MAPK3	30114105	30123506	mitogen-activated pr...	no	no	no	no
ENSG00000102890	88.612	0.7	0.176	3.985	6.7e-05	0.00073	up	16	ELMO3	67199111	67204029	engulfment and cell ...	no	no	no	no
ENSG00000102935	322.543	2.511	0.402	6.254	4e-10	1.4e-08	up	16	ZNF423	49487524	49857919	zinc finger protein ...	no	no	no	no
ENSG00000102996	167.012	-1.368	0.253	-5.414	6.2e-08	1.4e-06	down	16	MMP15	58025754	58046901	matrix metallopeptid...	no	no	no	no
ENSG00000103034	432.402	1.53	0.202	7.565	3.9e-14	2.6e-12	up	16	NDRG4	58462846	58513628	NDRG family member 4...	no	no	no	no
ENSG00000103047	940.144	-1.234	0.143	-8.626	6.4e-18	7e-16	down	16	TANGO6	68843531	69085182	transport and golgi ...	no	no	no	no
ENSG00000103066	1493.47	-1.057	0.247	-4.273	1.9e-05	0.00024	down	16	PLA2G15	68245304	68261058	phospholipase A2 gro...	no	no	no	no
ENSG00000103187	13418.1	0.583	0.147	3.974	7.1e-05	0.00076	up	16	COTL1	84565596	84618078	coactosin like F-act...	no	no	no	no
ENSG00000103249	2573.97	-0.794	0.197	-4.033	5.5e-05	0.00061	down	16	CLCN7	1444934	1475077	chloride voltage-gat...	no	no	no	no
ENSG00000103257	7516.54	1.253	0.247	5.064	4.1e-07	7.9e-06	up	16	SLC7A5	87830023	87869507	solute carrier famil...	no	no	no	no
ENSG00000103381	1915.44	-0.605	0.075	-8.11	5e-16	4.1e-14	down	16	CPPED1	12659799	12803887	calcineurin like pho...	no	no	no	no
ENSG00000103449	1065.61	0.855	0.218	3.926	8.6e-05	0.00091	up	16	SALL1	51135982	51152334	spalt like transcrip...	no	no	no	no
ENSG00000103742	714.163	1.561	0.248	6.284	3.3e-10	1.2e-08	up	15	IGDCC4	65381484	65422947	immunoglobulin super...	no	no	no	no
ENSG00000103966	2040.1	-0.64	0.128	-5.014	5.3e-07	1e-05	down	15	EHD4	41895933	41972557	EH domain containing...	no	no	no	no
ENSG00000103994	3920.85	-0.377	0.101	-3.728	0.00019	0.002	down	15	ZNF106	42412823	42491141	zinc finger protein ...	no	no	no	no
ENSG00000104043	63.681	1.179	0.352	3.351	0.00081	0.006	up	15	ATP8B4	49858238	50182817	ATPase phospholipid ...	no	no	no	no
ENSG00000104081	524.918	1.428	0.272	5.246	1.6e-07	3.2e-06	up	15	BMF	40087890	40108892	Bcl2 modifying facto...	no	no	no	no
ENSG00000104219	1033.56	-0.994	0.137	-7.267	3.7e-13	2.1e-11	down	8	ZDHHC2	17156482	17224799	zinc finger DHHC-typ...	no	no	no	no
ENSG00000104228	807.321	-0.503	0.139	-3.613	0.0003	0.003	down	8	TRIM35	27284886	27311272	tripartite motif con...	no	no	no	no
ENSG00000104325	1941.81	0.351	0.105	3.334	0.00086	0.006	up	8	DECR1	90001405	90053633	2,4-dienoyl-CoA redu...	no	no	no	no
ENSG00000104368	1257.31	1.182	0.122	9.716	2.6e-22	5.1e-20	up	8	PLAT	42174718	42207709	plasminogen activato...	no	no	no	no
ENSG00000104381	303.506	0.665	0.142	4.671	3e-06	4.7e-05	up	8	GDAP1	74320613	74518007	ganglioside induced ...	no	no	no	no
ENSG00000104490	581.88	-1.57	0.188	-8.365	6e-17	5.8e-15	down	8	NCALD	101686542	102124907	neurocalcin delta [S...	no	no	no	no
ENSG00000104524	356.176	-0.524	0.131	-3.989	6.6e-05	0.00072	down	8	PYCR3	143603210	143609773	pyrroline-5-carboxyl...	no	no	no	no
ENSG00000104529	2970.96	0.336	0.104	3.24	0.001	0.008	up	8	EEF1D	143579697	143599541	eukaryotic translati...	no	no	no	no
ENSG00000104689	160.214	-0.814	0.191	-4.269	2e-05	0.00024	down	8	TNFRSF10A	23190452	23225102	TNF receptor superfa...	no	no	no	no
ENSG00000104691	390.563	-0.289	0.088	-3.272	0.001	0.008	down	8	UBXN8	30729131	30767006	UBX domain protein 8...	no	no	no	no
ENSG00000104756	3373.62	-0.407	0.123	-3.295	0.00098	0.007	down	8	KCTD9	25427847	25458476	potassium channel te...	no	no	no	no
ENSG00000104763	4287.48	-0.905	0.187	-4.842	1.3e-06	2.2e-05	down	8	ASAH1	18055992	18084998	N-acylsphingosine am...	no	no	no	no
ENSG00000105186	1648.59	-0.327	0.091	-3.603	0.00031	0.003	down	19	ANKRD27	32597006	32676597	ankyrin repeat domai...	no	no	no	no
ENSG00000105255	213.17	1.303	0.289	4.503	6.7e-06	9.5e-05	up	19	FSD1	4304598	4323843	fibronectin type III...	no	no	no	no
ENSG00000105339	634.536	-1.257	0.198	-6.359	2e-10	7.5e-09	down	8	DENND3	141117278	141195808	DENN domain containi...	no	no	no	no
ENSG00000105443	2474.27	0.465	0.081	5.706	1.2e-08	3e-07	up	19	CYTH2	48469208	48482314	cytohesin 2 [Source:...	no	no	no	no
ENSG00000105464	492.028	-1.263	0.146	-8.632	6e-18	6.7e-16	down	19	GRIN2D	48393668	48444931	glutamate ionotropic...	no	no	no	no
ENSG00000105516	172.511	0.681	0.194	3.518	0.00043	0.004	up	19	DBP	48630030	48637379	D-box binding PAR bZ...	no	no	no	no
ENSG00000105605	27.822	4.518	1.391	3.248	0.001	0.008	up	19	CACNG7	53909278	53943950	calcium voltage-gate...	no	no	no	no
ENSG00000105619	391.343	-0.622	0.183	-3.398	0.00068	0.005	down	19	TFPT	54107020	54115657	TCF3 fusion partner ...	no	no	no	no
ENSG00000105711	327.289	1.079	0.205	5.271	1.4e-07	2.8e-06	up	19	SCN1B	35030470	35040449	sodium voltage-gated...	no	no	no	no
ENSG00000105755	504.595	0.684	0.159	4.31	1.6e-05	0.00021	up	19	ETHE1	43506719	43527230	ETHE1 persulfide dio...	no	no	no	no
ENSG00000105810	4644.74	0.674	0.142	4.741	2.1e-06	3.4e-05	up	7	CDK6	92604921	92836573	cyclin dependent kin...	no	no	no	no
ENSG00000105849	988.829	-0.422	0.128	-3.299	0.00097	0.007	down	7	POLR1F	19695461	19709037	RNA polymerase I sub...	no	no	no	no
ENSG00000105889	310.355	-2.031	0.306	-6.644	3e-11	1.3e-09	down	7	STEAP1B	22419444	22727613	STEAP family member ...	no	no	no	no
ENSG00000105894	1533.59	1.76	0.286	6.154	7.5e-10	2.5e-08	up	7	PTN	137227341	137343774	pleiotrophin [Source...	no	no	no	no
ENSG00000105926	436.587	-0.511	0.147	-3.47	0.00052	0.004	down	7	PALS2	24573268	24694193	protein associated w...	no	no	no	no
ENSG00000105953	5204.98	-0.592	0.181	-3.273	0.001	0.008	down	7	OGDH	44606572	44709066	oxoglutarate dehydro...	no	no	no	no
ENSG00000105989	886.092	3.286	0.454	7.233	4.7e-13	2.6e-11	up	7	WNT2	117275451	117323152	Wnt family member 2 ...	no	no	no	no
ENSG00000105991	69.199	-1.212	0.359	-3.371	0.00075	0.006	down	7	HOXA1	27092993	27096000	homeobox A1 [Source:...	no	no	no	no
ENSG00000106003	586.942	-1.737	0.273	-6.374	1.8e-10	6.9e-09	down	7	LFNG	2512529	2529177	LFNG O-fucosylpeptid...	no	no	no	no
ENSG00000106012	1387.26	-0.451	0.135	-3.354	0.0008	0.006	down	7	IQCE	2558972	2614733	IQ motif containing ...	no	no	no	no
ENSG00000106049	1720.48	-0.564	0.17	-3.31	0.00093	0.007	down	7	HIBADH	27525442	27662883	3-hydroxyisobutyrate...	no	no	no	no
ENSG00000106070	3260.43	0.524	0.16	3.268	0.001	0.008	up	7	GRB10	50590063	50793462	growth factor recept...	no	no	no	no
ENSG00000106089	546.938	0.801	0.197	4.056	5e-05	0.00056	up	7	STX1A	73699206	73719672	syntaxin 1A [Source:...	no	no	no	no
ENSG00000106123	245.362	-1.923	0.555	-3.465	0.00053	0.004	down	7	EPHB6	142855061	142871094	EPH receptor B6 [Sou...	no	no	no	no
ENSG00000106236	33.838	3.168	0.386	8.204	2.3e-16	2e-14	up	7	NPTX2	98617285	98629869	neuronal pentraxin 2...	no	no	no	no
ENSG00000106351	329.915	-0.584	0.105	-5.547	2.9e-08	6.9e-07	down	7	AGFG2	100539203	100568220	ArfGAP with FG repea...	no	no	no	no
ENSG00000106392	2126.43	-0.486	0.134	-3.615	0.0003	0.003	down	7	C1GALT1	7156934	7248616	core 1 synthase, gly...	no	no	no	no
ENSG00000106404	335.547	-0.674	0.194	-3.469	0.00052	0.004	down	7	CLDN15	101232092	101238820	claudin 15 [Source:H...	no	no	no	no
ENSG00000106484	863.355	3.602	0.356	10.125	4.3e-24	9.7e-22	up	7	MEST	130486171	130506465	mesoderm specific tr...	no	no	no	no
ENSG00000106511	159.105	-2.345	0.672	-3.491	0.00048	0.004	down	7	MEOX2	15611212	15686683	mesenchyme homeobox ...	no	no	no	no
ENSG00000106546	1315.33	0.532	0.161	3.302	0.00096	0.007	up	7	AHR	16916359	17346152	aryl hydrocarbon rec...	no	no	no	no
ENSG00000106714	32.06	21.845	2.64	8.276	1.3e-16	1.1e-14	up	9	CNTNAP3	39064710	39288315	contactin associated...	no	no	no	no
ENSG00000106733	661.611	0.452	0.081	5.602	2.1e-08	5.2e-07	up	9	NMRK1	75060573	75088217	nicotinamide ribosid...	no	no	no	no
ENSG00000106772	2050.92	2.105	0.31	6.786	1.1e-11	5.3e-10	up	9	PRUNE2	76611376	76906114	prune homolog 2 with...	no	no	no	no
ENSG00000106780	1008.53	-0.716	0.128	-5.58	2.4e-08	5.8e-07	down	9	MEGF9	120600811	120714470	multiple EGF like do...	no	no	no	no
ENSG00000106823	679.109	-0.99	0.288	-3.431	0.0006	0.005	down	9	ECM2	92493554	92536655	extracellular matrix...	no	no	no	no
ENSG00000106991	9012.05	-0.364	0.081	-4.506	6.6e-06	9.4e-05	down	9	ENG	127815013	127854658	endoglin [Source:HGN...	no	no	no	no
ENSG00000107077	1164.08	0.407	0.079	5.17	2.3e-07	4.7e-06	up	9	KDM4C	6720863	7175648	lysine demethylase 4...	no	no	no	no
ENSG00000107159	70.49	2.676	0.596	4.489	7.1e-06	0.0001	up	9	CA9	35673928	35681159	carbonic anhydrase 9...	no	no	no	no
ENSG00000107201	915.412	0.965	0.291	3.32	0.0009	0.007	up	9	RIGI	32455302	32526208	RNA sensor RIG-I [So...	no	no	no	no
ENSG00000107249	862.621	1.167	0.206	5.659	1.5e-08	3.9e-07	up	9	GLIS3	3824127	4348392	GLIS family zinc fin...	no	no	no	no
ENSG00000107282	368.114	-0.93	0.133	-7.014	2.3e-12	1.2e-10	down	9	APBA1	69427532	69672371	amyloid beta precurs...	no	no	no	no
ENSG00000107331	2668.33	-0.898	0.206	-4.356	1.3e-05	0.00017	down	9	ABCA2	137007234	137028915	ATP binding cassette...	no	no	no	no
ENSG00000107562	22077.1	-1.016	0.175	-5.794	6.9e-09	1.9e-07	down	10	CXCL12	44370165	44386493	C-X-C motif chemokin...	no	no	no	no
ENSG00000107566	3931.86	-0.711	0.171	-4.154	3.3e-05	0.00038	down	10	ERLIN1	100150094	100186033	ER lipid raft associ...	no	no	no	no
ENSG00000107738	2382.88	-0.793	0.236	-3.36	0.00078	0.006	down	10	VSIR	71747556	71773520	V-set immunoregulato...	no	no	no	no
ENSG00000107863	8309.35	-0.403	0.123	-3.275	0.001	0.008	down	10	ARHGAP21	24583609	24723887	Rho GTPase activatin...	no	no	no	no
ENSG00000107984	12427.1	-1.355	0.195	-6.958	3.4e-12	1.7e-10	down	10	DKK1	52314281	52318042	dickkopf WNT signali...	no	no	no	no
ENSG00000108001	194.658	1.753	0.442	3.964	7.4e-05	0.00079	up	10	EBF3	129835233	129973053	EBF transcription fa...	no	no	no	no
ENSG00000108370	58.56	1.167	0.361	3.238	0.001	0.009	up	17	RGS9	65100812	65227703	regulator of G prote...	no	no	no	no
ENSG00000108439	387.938	-0.744	0.173	-4.309	1.6e-05	0.00021	down	17	PNPO	47941506	47949308	pyridoxamine 5'-phos...	no	no	no	no
ENSG00000108474	364.79	0.396	0.103	3.854	0.00012	0.001	up	17	PIGL	16217191	16351797	phosphatidylinositol...	no	no	no	no
ENSG00000108515	247.384	0.537	0.164	3.285	0.001	0.007	up	17	ENO3	4948092	4957131	enolase 3 [Source:HG...	no	no	no	no
ENSG00000108556	38.845	-2.246	0.349	-6.434	1.2e-10	4.8e-09	down	17	CHRNE	4897771	4934438	cholinergic receptor...	no	no	no	no
ENSG00000108592	2514.79	0.312	0.086	3.64	0.00027	0.002	up	17	FTSJ3	63819433	63830012	FtsJ RNA 2'-O-methyl...	no	no	no	no
ENSG00000108691	270.148	1.333	0.226	5.907	3.5e-09	1e-07	up	17	CCL2	34255274	34257208	C-C motif chemokine ...	no	no	no	no
ENSG00000108823	89.974	-1.331	0.417	-3.191	0.001	0.01	down	17	SGCA	50164214	50175928	sarcoglycan alpha [S...	no	no	no	no
ENSG00000108861	3143.35	-0.684	0.181	-3.787	0.00015	0.001	down	17	DUSP3	43766125	43778977	dual specificity pho...	no	no	no	no
ENSG00000109016	489.973	-0.683	0.168	-4.076	4.6e-05	0.00052	down	17	DHRS7B	21123364	21193265	dehydrogenase/reduct...	no	no	no	no
ENSG00000109066	2079.43	-0.702	0.206	-3.401	0.00067	0.005	down	17	TMEM104	74776499	74839753	transmembrane protei...	no	no	no	no
ENSG00000109099	4954.7	-0.735	0.156	-4.714	2.4e-06	3.9e-05	down	17	PMP22	15229773	15272292	peripheral myelin pr...	no	no	no	no
ENSG00000109113	5449.61	0.323	0.089	3.63	0.00028	0.003	up	17	RAB34	28714281	28718429	RAB34, member RAS on...	no	no	no	no
ENSG00000109320	2155.08	-0.497	0.081	-6.176	6.6e-10	2.2e-08	down	4	NFKB1	102501330	102617302	nuclear factor kappa...	no	no	no	no
ENSG00000109323	1587.38	-0.99	0.085	-11.693	1.4e-31	5.6e-29	down	4	MANBA	102630770	102760994	mannosidase beta [So...	no	no	no	no
ENSG00000109436	1967.1	-0.359	0.096	-3.736	0.00019	0.002	down	4	TBC1D9	140620782	140756385	TBC1 domain family m...	no	no	no	no
ENSG00000109445	1291.99	-0.378	0.08	-4.722	2.3e-06	3.7e-05	down	4	ZNF330	141220887	141234697	zinc finger protein ...	no	no	no	no
ENSG00000109586	991.406	-0.791	0.141	-5.615	2e-08	4.9e-07	down	4	GALNT7	173168811	173323967	polypeptide N-acetyl...	no	no	no	no
ENSG00000109738	321.029	-0.727	0.214	-3.399	0.00068	0.005	down	4	GLRB	157076125	157172090	glycine receptor bet...	no	no	no	no
ENSG00000109790	2182.72	0.834	0.202	4.138	3.5e-05	0.0004	up	4	KLHL5	39045039	39126857	kelch like family me...	no	no	no	no
ENSG00000109794	81.775	-1.123	0.211	-5.331	9.8e-08	2.1e-06	down	4	FAM149A	186104419	186175337	family with sequence...	no	no	no	no
ENSG00000109846	10347.6	-0.843	0.225	-3.751	0.00018	0.002	down	11	CRYAB	111908564	111923722	crystallin alpha B [...	no	no	no	no
ENSG00000109929	1826.61	-0.4	0.119	-3.371	0.00075	0.006	down	11	SC5D	121292681	121313410	sterol-C5-desaturase...	no	no	no	no
ENSG00000109944	431.776	-0.595	0.165	-3.603	0.00031	0.003	down	11	JHY	122882683	122963862	junctional cadherin ...	no	no	no	no
ENSG00000109971	42158.5	-0.492	0.103	-4.774	1.8e-06	3e-05	down	11	HSPA8	123057489	123063230	heat shock protein f...	no	no	no	no
ENSG00000110076	346.618	-1.906	0.345	-5.523	3.3e-08	7.9e-07	down	11	NRXN2	64606174	64723197	neurexin 2 [Source:H...	no	no	no	no
ENSG00000110080	1137.43	-0.499	0.133	-3.758	0.00017	0.002	down	11	ST3GAL4	126355640	126440344	ST3 beta-galactoside...	no	no	no	no
ENSG00000110090	3238.47	-0.734	0.099	-7.409	1.3e-13	7.9e-12	down	11	CPT1A	68754620	68844410	carnitine palmitoylt...	no	no	no	no
ENSG00000110092	23262.8	-0.681	0.206	-3.313	0.00092	0.007	down	11	CCND1	69641156	69654474	cyclin D1 [Source:HG...	no	no	no	no
ENSG00000110108	3282.49	-0.435	0.119	-3.64	0.00027	0.002	down	11	TMEM109	60914158	60923443	transmembrane protei...	no	no	no	no
ENSG00000110436	176.877	1.303	0.203	6.427	1.3e-10	5e-09	up	11	SLC1A2	35251205	35420063	solute carrier famil...	no	no	no	no
ENSG00000110446	239.175	-0.661	0.189	-3.497	0.00047	0.004	down	11	SLC15A3	60937060	60952653	solute carrier famil...	no	no	no	no
ENSG00000110756	1488.01	-1.034	0.175	-5.906	3.5e-09	1e-07	down	11	HPS5	18278668	18322198	HPS5 biogenesis of l...	no	no	no	no
ENSG00000110841	7193.88	0.436	0.116	3.749	0.00018	0.002	up	12	PPFIBP1	27523431	27695564	PPFIA binding protei...	no	no	no	no
ENSG00000110931	2901.17	-0.332	0.086	-3.875	0.00011	0.001	down	12	CAMKK2	121237675	121298308	calcium/calmodulin d...	no	no	no	no
ENSG00000111012	55.222	1.092	0.246	4.429	9.5e-06	0.00013	up	12	CYP27B1	57762334	57768986	cytochrome P450 fami...	no	no	no	no
ENSG00000111057	321.072	2.014	0.366	5.502	3.7e-08	8.8e-07	up	12	KRT18	52948871	52952906	keratin 18 [Source:H...	no	no	no	no
ENSG00000111087	234.34	0.789	0.231	3.408	0.00066	0.005	up	12	GLI1	57459785	57472268	GLI family zinc fing...	no	no	no	no
ENSG00000111252	4300.95	-0.48	0.138	-3.475	0.00051	0.004	down	12	SH2B3	111405923	111451623	SH2B adaptor protein...	no	no	no	no
ENSG00000111261	159.933	-0.851	0.173	-4.908	9.2e-07	1.6e-05	down	12	MANSC1	12326056	12350242	MANSC domain contain...	no	no	no	no
ENSG00000111321	5932.74	-0.398	0.123	-3.244	0.001	0.008	down	12	LTBR	6375045	6391571	lymphotoxin beta rec...	no	no	no	no
ENSG00000111331	1137.02	1.193	0.294	4.055	5e-05	0.00056	up	12	OAS3	112938051	112976460	2'-5'-oligoadenylate...	no	no	no	no
ENSG00000111348	479.137	-1.286	0.22	-5.845	5.1e-09	1.4e-07	down	12	ARHGDIB	14942031	14961728	Rho GDP dissociation...	no	no	no	no
ENSG00000111669	34939.8	0.617	0.156	3.956	7.6e-05	0.00081	up	12	TPI1	6867119	6870948	triosephosphate isom...	no	no	no	no
ENSG00000111674	4344.52	0.82	0.214	3.842	0.00012	0.001	up	12	ENO2	6913745	6923698	enolase 2 [Source:HG...	no	no	no	no
ENSG00000111727	1510.69	-0.359	0.107	-3.342	0.00083	0.006	down	12	HCFC2	104064531	104106524	host cell factor C2 ...	no	no	no	no
ENSG00000111752	1106.71	0.388	0.093	4.189	2.8e-05	0.00033	up	12	PHC1	8913896	8941467	polyhomeotic homolog...	no	no	no	no
ENSG00000111801	732.406	-0.667	0.104	-6.446	1.1e-10	4.5e-09	down	6	BTN3A3	26440472	26453415	butyrophilin subfami...	no	no	no	no
ENSG00000111816	66.797	-0.819	0.229	-3.569	0.00036	0.003	down	6	FRK	115931149	116060891	fyn related Src fami...	no	no	no	no
ENSG00000111859	1858.78	-0.797	0.206	-3.865	0.00011	0.001	down	6	NEDD9	11183298	11382348	neural precursor cel...	no	no	no	no
ENSG00000111907	630.743	-1.04	0.297	-3.499	0.00047	0.004	down	6	TPD52L1	125119049	125264407	TPD52 like 1 [Source...	no	no	no	no
ENSG00000112078	6132.38	-0.9	0.219	-4.107	4e-05	0.00046	down	6	KCTD20	36442767	36491143	potassium channel te...	no	no	no	no
ENSG00000112079	5109.39	-0.913	0.212	-4.3	1.7e-05	0.00021	down	6	STK38	36493892	36547479	serine/threonine kin...	no	no	no	no
ENSG00000112139	839.594	-1.073	0.198	-5.426	5.8e-08	1.3e-06	down	6	MDGA1	37630679	37699306	MAM domain containin...	no	no	no	no
ENSG00000112182	58.009	3.489	0.323	10.819	2.8e-27	8.4e-25	up	6	BACH2	89926528	90296843	BTB domain and CNC h...	no	no	no	no
ENSG00000112218	21.799	-2.222	0.531	-4.184	2.9e-05	0.00034	down	6	GPR63	96794125	96837477	G protein-coupled re...	no	no	no	no
ENSG00000112246	510.541	-0.574	0.143	-4.013	6e-05	0.00066	down	6	SIM1	100385009	100464921	SIM bHLH transcripti...	no	no	no	no
ENSG00000112276	1602.47	-0.682	0.135	-5.05	4.4e-07	8.4e-06	down	6	BVES	105096822	105137157	blood vessel epicard...	no	no	no	no
ENSG00000112297	1146.62	1.054	0.184	5.742	9.3e-09	2.5e-07	up	6	CRYBG1	106360717	106572017	crystallin beta-gamm...	no	no	no	no
ENSG00000112320	58.368	-1.798	0.193	-9.293	1.5e-20	2.4e-18	down	6	SOBP	107490106	107661306	sine oculis binding ...	no	no	no	no
ENSG00000112365	604.476	-0.419	0.12	-3.495	0.00047	0.004	down	6	ZBTB24	109460632	109483239	zinc finger and BTB ...	no	no	no	no
ENSG00000112378	2666.86	-0.63	0.166	-3.798	0.00015	0.001	down	6	PERP	138088505	138107419	p53 apoptosis effect...	no	no	no	no
ENSG00000112379	47.643	1.897	0.49	3.869	0.00011	0.001	up	6	ARFGEF3	138161939	138344663	ARFGEF family member...	no	no	no	no
ENSG00000112419	3042.72	-0.761	0.167	-4.545	5.5e-06	8e-05	down	6	PHACTR2	143536845	143831185	phosphatase and acti...	no	no	no	no
ENSG00000112619	81.62	-1.256	0.201	-6.263	3.8e-10	1.3e-08	down	6	PRPH2	42696598	42722597	peripherin 2 [Source...	no	no	no	no
ENSG00000112697	11983.9	-0.335	0.088	-3.798	0.00015	0.001	down	6	TMEM30A	75252924	75284948	transmembrane protei...	no	no	no	no
ENSG00000112715	11898.1	0.971	0.292	3.322	0.0009	0.007	up	6	VEGFA	43770184	43786487	vascular endothelial...	no	no	no	no
ENSG00000112759	486.66	-1.476	0.159	-9.27	1.9e-20	2.9e-18	down	6	SLC29A1	44219553	44234142	solute carrier famil...	no	no	no	no
ENSG00000112893	5936.38	-0.64	0.113	-5.682	1.3e-08	3.5e-07	down	5	MAN2A1	109689927	109869625	mannosidase alpha cl...	no	no	no	no
ENSG00000112964	187.056	-0.82	0.148	-5.521	3.4e-08	8e-07	down	5	GHR	42423439	42721878	growth hormone recep...	no	no	no	no
ENSG00000113070	479.602	1.301	0.319	4.085	4.4e-05	0.0005	up	5	HBEGF	140332843	140346603	heparin binding EGF ...	no	no	no	no
ENSG00000113273	3641.19	-0.636	0.184	-3.449	0.00056	0.005	down	5	ARSB	78777209	78986087	arylsulfatase B [Sou...	no	no	no	no
ENSG00000113296	93.839	2.883	0.403	7.159	8.1e-13	4.4e-11	up	5	THBS4	79991311	80083287	thrombospondin 4 [So...	no	no	no	no
ENSG00000113361	117.77	-2.1	0.223	-9.422	4.4e-21	7.7e-19	down	5	CDH6	31193686	31329146	cadherin 6 [Source:H...	no	no	no	no
ENSG00000113369	2331.81	1.048	0.29	3.61	0.00031	0.003	up	5	ARRDC3	91368631	91383317	arrestin domain cont...	no	no	no	no
ENSG00000113389	1875.81	1.266	0.235	5.381	7.4e-08	1.6e-06	up	5	NPR3	32689070	32791724	natriuretic peptide ...	no	no	no	no
ENSG00000113441	2441.77	-0.374	0.07	-5.315	1.1e-07	2.3e-06	down	5	LNPEP	96935394	97037513	leucyl and cystinyl ...	no	no	no	no
ENSG00000113448	255.034	1.357	0.203	6.674	2.5e-11	1.1e-09	up	5	PDE4D	58969038	60522120	phosphodiesterase 4D...	no	no	no	no
ENSG00000113580	6528.23	-0.499	0.153	-3.263	0.001	0.008	down	5	NR3C1	143277931	143435512	nuclear receptor sub...	no	no	no	no
ENSG00000113583	3016.47	-0.32	0.087	-3.671	0.00024	0.002	down	5	C5orf15	133955510	133968674	chromosome 5 open re...	no	no	no	no
ENSG00000113790	442.62	-0.544	0.097	-5.587	2.3e-08	5.6e-07	down	3	EHHADH	185190624	185281990	enoyl-CoA hydratase ...	no	no	no	no
ENSG00000114023	1102.52	0.937	0.154	6.092	1.1e-09	3.6e-08	up	3	FAM162A	122384161	122412334	family with sequence...	no	no	no	no
ENSG00000114107	361.938	0.523	0.151	3.474	0.00051	0.004	up	3	CEP70	138494344	138594538	centrosomal protein ...	no	no	no	no
ENSG00000114115	80.046	5.136	0.402	12.771	2.4e-37	1.3e-34	up	3	RBP1	139517434	139539829	retinol binding prot...	no	no	no	no
ENSG00000114166	811.804	-0.947	0.112	-8.444	3.1e-17	3.1e-15	down	3	KAT2B	20040446	20154404	lysine acetyltransfe...	no	no	no	no
ENSG00000114251	13838.6	1.333	0.202	6.595	4.2e-11	1.8e-09	up	3	WNT5A	55465715	55490539	Wnt family member 5A...	no	no	no	no
ENSG00000114268	784.612	1.446	0.236	6.119	9.4e-10	3.1e-08	up	3	PFKFB4	48517684	48562015	6-phosphofructo-2-ki...	no	no	no	no
ENSG00000114270	9437.24	1.597	0.234	6.821	9e-12	4.2e-10	up	3	COL7A1	48564073	48595329	collagen type VII al...	no	no	no	no
ENSG00000114374	4537.18	1.216	0.073	16.563	1.3e-61	3.4e-58	up	Y	USP9Y	12537650	12860839	ubiquitin specific p...	no	no	no	no
ENSG00000114378	78.682	-2.737	0.339	-8.067	7.2e-16	5.8e-14	down	3	HYAL1	50299890	50312381	hyaluronidase 1 [Sou...	no	no	no	no
ENSG00000114405	324.883	-0.444	0.139	-3.189	0.001	0.01	down	3	C3orf14	62319015	62336213	chromosome 3 open re...	no	no	no	no
ENSG00000114446	1162.59	-0.442	0.133	-3.318	0.00091	0.007	down	3	IFT57	108160812	108222435	intraflagellar trans...	no	no	no	no
ENSG00000114450	4906.57	-0.557	0.148	-3.765	0.00017	0.002	down	3	GNB4	179396088	179451476	G protein subunit be...	no	no	no	no
ENSG00000114790	88.095	-1.921	0.234	-8.214	2.1e-16	1.9e-14	down	3	ARHGEF26	154121003	154257827	Rho guanine nucleoti...	no	no	no	no
ENSG00000114853	2855.89	-0.765	0.182	-4.192	2.8e-05	0.00033	down	3	ZBTB47	42653697	42667580	zinc finger and BTB ...	no	no	no	no
ENSG00000115041	474.721	1.182	0.288	4.11	3.9e-05	0.00045	up	2	KCNIP3	95297327	95386077	potassium voltage-ga...	no	no	no	no
ENSG00000115109	485.539	0.498	0.149	3.338	0.00085	0.006	up	2	EPB41L5	120013077	120179119	erythrocyte membrane...	no	no	no	no
ENSG00000115234	5246.4	-0.23	0.072	-3.186	0.001	0.01	down	2	SNX17	27370496	27377535	sorting nexin 17 [So...	no	no	no	no
ENSG00000115266	168.619	-0.668	0.208	-3.21	0.001	0.009	down	19	APC2	1446302	1473244	APC regulator of WNT...	no	no	no	no
ENSG00000115267	268.328	1.93	0.335	5.752	8.8e-09	2.4e-07	up	2	IFIH1	162267074	162318684	interferon induced w...	no	no	no	no
ENSG00000115271	37.302	2.204	0.4	5.507	3.7e-08	8.6e-07	up	2	GCA	162318840	162371595	grancalcin [Source:H...	no	no	no	no
ENSG00000115306	19636.1	-0.488	0.147	-3.306	0.00094	0.007	down	2	SPTBN1	54456317	54671446	spectrin beta, non-e...	no	no	no	no
ENSG00000115325	1380.37	-0.472	0.131	-3.6	0.00032	0.003	down	2	DOK1	74549026	74557551	docking protein 1 [S...	no	no	no	no
ENSG00000115339	60.196	2.189	0.391	5.602	2.1e-08	5.2e-07	up	2	GALNT3	165747588	165794659	polypeptide N-acetyl...	no	no	no	no
ENSG00000115380	7472.6	2.739	0.39	7.026	2.1e-12	1.1e-10	up	2	EFEMP1	55865967	55924139	EGF containing fibul...	no	no	no	no
ENSG00000115414	1.70909e+06	0.811	0.128	6.348	2.2e-10	8e-09	up	2	FN1	215360440	215436073	fibronectin 1 [Sourc...	no	no	no	no
ENSG00000115419	19878.3	-1.019	0.132	-7.724	1.1e-14	7.9e-13	down	2	GLS	190880821	190965552	glutaminase [Source:...	no	no	no	no
ENSG00000115457	847.622	2.318	0.607	3.818	0.00013	0.001	up	2	IGFBP2	216632828	216664436	insulin like growth ...	no	no	no	no
ENSG00000115548	2498.51	0.682	0.12	5.682	1.3e-08	3.5e-07	up	2	KDM3A	86440647	86492716	lysine demethylase 3...	no	no	no	no
ENSG00000115808	2189.62	-0.367	0.109	-3.378	0.00073	0.006	down	2	STRN	36837698	36966536	striatin [Source:HGN...	no	no	no	no
ENSG00000115902	2990.77	1.621	0.394	4.117	3.8e-05	0.00044	up	2	SLC1A4	64988477	65023865	solute carrier famil...	no	no	no	no
ENSG00000115946	722.136	-0.456	0.14	-3.262	0.001	0.008	down	2	PNO1	68157888	68176238	partner of NOB1 homo...	no	no	no	no
ENSG00000115963	10449.5	-0.603	0.136	-4.425	9.7e-06	0.00013	down	2	RND3	150468195	150539011	Rho family GTPase 3 ...	no	no	no	no
ENSG00000115993	4303.77	-0.223	0.064	-3.507	0.00045	0.004	down	2	TRAK2	201377207	201451500	trafficking kinesin ...	no	no	no	no
ENSG00000116016	9920.73	-0.876	0.194	-4.522	6.1e-06	8.8e-05	down	2	EPAS1	46293667	46386697	endothelial PAS doma...	no	no	no	no
ENSG00000116017	659.515	0.536	0.149	3.596	0.00032	0.003	up	19	ARID3A	925781	975939	AT-rich interaction ...	no	no	no	no
ENSG00000116096	326.214	-0.538	0.143	-3.767	0.00017	0.002	down	2	SPR	72887382	72892158	sepiapterin reductas...	no	no	no	no
ENSG00000116117	963.949	-1.108	0.249	-4.454	8.4e-06	0.00012	down	2	PARD3B	204545475	205620162	par-3 family cell po...	no	no	no	no
ENSG00000116132	15304.5	-0.669	0.161	-4.145	3.4e-05	0.00039	down	1	PRRX1	170662728	170739421	paired related homeo...	no	no	no	no
ENSG00000116199	4066.88	-0.549	0.093	-5.908	3.5e-09	1e-07	down	1	FAM20B	179025804	179076567	FAM20B glycosaminogl...	no	no	no	no
ENSG00000116285	2813.58	0.951	0.215	4.414	1e-05	0.00014	up	1	ERRFI1	8004404	8026309	ERBB receptor feedba...	no	no	no	no
ENSG00000116667	1224.76	-0.777	0.24	-3.233	0.001	0.009	down	1	C1orf21	184387029	184629019	chromosome 1 open re...	no	no	no	no
ENSG00000116704	1830.13	-0.511	0.125	-4.086	4.4e-05	0.00049	down	1	SLC35D1	66999350	67054148	solute carrier famil...	no	no	no	no
ENSG00000116852	104.743	3.507	0.475	7.384	1.5e-13	9.3e-12	up	1	KIF21B	200969390	201023714	kinesin family membe...	no	no	no	no
ENSG00000117069	352.309	1.732	0.292	5.924	3.1e-09	9.3e-08	up	1	ST6GALNAC5	76867480	77067546	ST6 N-acetylgalactos...	no	no	no	no
ENSG00000117115	32.118	-3.893	0.723	-5.381	7.4e-08	1.6e-06	down	1	PADI2	17066761	17119451	peptidyl arginine de...	no	no	no	no
ENSG00000117262	263.827	-0.648	0.16	-4.057	5e-05	0.00056	down	1	GPR89A	145607988	145670650	G protein-coupled re...	no	no	no	no
ENSG00000117266	90.887	3.352	0.412	8.13	4.3e-16	3.6e-14	up	1	CDK18	205504596	205532793	cyclin dependent kin...	no	no	no	no
ENSG00000117394	6635.49	1.224	0.196	6.23	4.7e-10	1.6e-08	up	1	SLC2A1	42925353	42958893	solute carrier famil...	no	no	no	no
ENSG00000117569	534.345	0.483	0.103	4.67	3e-06	4.7e-05	up	1	PTBP2	96721665	96823738	polypyrimidine tract...	no	no	no	no
ENSG00000117595	134.426	1.579	0.304	5.202	2e-07	4e-06	up	1	IRF6	209785617	209806175	interferon regulator...	no	no	no	no
ENSG00000117597	2120.75	-0.649	0.199	-3.258	0.001	0.008	down	1	UTP25	209827972	209857565	UTP25 small subunit ...	no	no	no	no
ENSG00000117602	1095.23	-0.434	0.102	-4.246	2.2e-05	0.00026	down	1	RCAN3	24502351	24541040	RCAN family member 3...	no	no	no	no
ENSG00000117748	958.32	-0.773	0.131	-5.888	3.9e-09	1.1e-07	down	1	RPA2	27891524	27914746	replication protein ...	no	no	no	no
ENSG00000117868	8320.46	-0.378	0.108	-3.504	0.00046	0.004	down	7	ESYT2	158730995	158830253	extended synaptotagm...	no	no	no	no
ENSG00000117984	4890.89	-0.796	0.222	-3.581	0.00034	0.003	down	11	CTSD	1752752	1764573	cathepsin D [Source:...	no	no	no	no
ENSG00000118523	76114.2	1.504	0.099	15.118	1.2e-51	1.6e-48	up	6	CCN2	131948176	131951372	cellular communicati...	no	no	no	no
ENSG00000118526	93.488	7.176	0.8	8.964	3.1e-19	4.2e-17	up	6	TCF21	133889113	133895553	transcription factor...	no	no	no	no
ENSG00000118680	16827	-0.333	0.086	-3.855	0.00012	0.001	down	18	MYL12B	3261479	3278461	myosin light chain 1...	no	no	no	no
ENSG00000118762	6489.16	-0.592	0.182	-3.246	0.001	0.008	down	4	PKD2	88007635	88077777	polycystin 2, transi...	no	no	no	no
ENSG00000118785	63.615	1.962	0.37	5.296	1.2e-07	2.5e-06	up	4	SPP1	87975667	87983532	secreted phosphoprot...	no	no	no	no
ENSG00000118894	284.826	-0.344	0.098	-3.503	0.00046	0.004	down	16	EEF2KMT	5084284	5097795	eukaryotic elongatio...	no	no	no	no
ENSG00000119280	8622.36	-0.868	0.259	-3.351	0.0008	0.006	down	1	C1orf198	230837119	230869589	chromosome 1 open re...	no	no	no	no
ENSG00000119514	69.005	-1.48	0.333	-4.446	8.8e-06	0.00012	down	9	GALNT12	98807670	98850081	polypeptide N-acetyl...	no	no	no	no
ENSG00000119669	2269.99	0.54	0.119	4.546	5.5e-06	8e-05	up	14	IRF2BPL	77024543	77028708	interferon regulator...	no	no	no	no
ENSG00000119699	402.251	-0.918	0.208	-4.416	1e-05	0.00014	down	14	TGFB3	75958097	75983011	transforming growth ...	no	no	no	no
ENSG00000119862	77.388	1.252	0.392	3.191	0.001	0.01	up	2	LGALSL	64453969	64461381	galectin like [Sourc...	no	no	no	no
ENSG00000119866	220.46	1.167	0.257	4.549	5.4e-06	7.9e-05	up	2	BCL11A	60450520	60554467	BAF chromatin remode...	no	no	no	no
ENSG00000119900	1092.26	-0.804	0.185	-4.339	1.4e-05	0.00018	down	6	OGFRL1	71288811	71309059	opioid growth factor...	no	no	no	no
ENSG00000119917	1024.6	1.027	0.31	3.312	0.00093	0.007	up	10	IFIT3	89327307	89377473	interferon induced p...	no	no	no	no
ENSG00000119950	1260.79	0.87	0.248	3.506	0.00045	0.004	up	10	MXI1	110207605	110287365	MAX interactor 1, di...	no	no	no	no
ENSG00000120068	347.679	2.212	0.655	3.375	0.00074	0.006	up	17	HOXB8	48611377	48615292	homeobox B8 [Source:...	no	no	no	no
ENSG00000120318	695.03	0.786	0.137	5.728	1e-08	2.7e-07	up	5	ARAP3	141653401	141682230	ArfGAP with RhoGAP d...	no	no	no	no
ENSG00000120875	558.265	-1.218	0.25	-4.881	1.1e-06	1.8e-05	down	8	DUSP4	29333064	29350684	dual specificity pho...	no	no	no	no
ENSG00000120899	352.114	-0.969	0.239	-4.054	5e-05	0.00056	down	8	PTK2B	27311482	27459391	protein tyrosine kin...	no	no	no	no
ENSG00000121039	1539.06	-1.481	0.34	-4.359	1.3e-05	0.00017	down	8	RDH10	73294602	73325281	retinol dehydrogenas...	no	no	no	no
ENSG00000121057	709.173	-0.499	0.138	-3.608	0.00031	0.003	down	17	AKAP1	57085092	57121346	A-kinase anchoring p...	no	no	no	no
ENSG00000121210	643.757	-0.566	0.126	-4.488	7.2e-06	0.0001	down	4	TMEM131L	153466346	153636711	transmembrane 131 li...	no	no	no	no
ENSG00000121281	2932.5	-0.937	0.135	-6.956	3.5e-12	1.7e-10	down	16	ADCY7	50246137	50318135	adenylate cyclase 7 ...	no	no	no	no
ENSG00000121361	102.339	-2.408	0.415	-5.805	6.4e-09	1.8e-07	down	12	KCNJ8	21764955	21775600	potassium inwardly r...	no	no	no	no
ENSG00000121769	133.113	-1.029	0.262	-3.924	8.7e-05	0.00091	down	1	FABP3	31365253	31376850	fatty acid binding p...	no	no	no	no
ENSG00000121904	3004.79	1.443	0.2	7.204	5.9e-13	3.2e-11	up	1	CSMD2	33513998	34165842	CUB and Sushi multip...	no	no	no	no
ENSG00000122359	10622.1	-0.374	0.097	-3.873	0.00011	0.001	down	10	ANXA11	80150889	80205572	annexin A11 [Source:...	no	no	no	no
ENSG00000122367	280.836	3.085	0.668	4.617	3.9e-06	5.9e-05	up	10	LDB3	86666785	86736072	LIM domain binding 3...	no	no	no	no
ENSG00000122591	5687.62	-0.464	0.125	-3.711	0.00021	0.002	down	7	HYCC1	22889371	23014130	hyccin PI4KA lipid k...	no	no	no	no
ENSG00000122644	793.837	-1.07	0.168	-6.369	1.9e-10	7.1e-09	down	7	ARL4A	12686856	12690958	ADP ribosylation fac...	no	no	no	no
ENSG00000122694	2643.26	0.619	0.133	4.658	3.2e-06	4.9e-05	up	9	GLIPR2	36136536	36163913	GLI pathogenesis rel...	no	no	no	no
ENSG00000122778	862.711	0.985	0.257	3.832	0.00013	0.001	up	7	KIAA1549	138831381	138981389	KIAA1549 [Source:HGN...	no	no	no	no
ENSG00000122862	688.137	-1.432	0.347	-4.125	3.7e-05	0.00043	down	10	SRGN	69088103	69104805	serglycin [Source:HG...	no	no	no	no
ENSG00000123091	5687.83	-0.399	0.112	-3.564	0.00036	0.003	down	1	RNF11	51236273	51273447	ring finger protein ...	no	no	no	no
ENSG00000123146	3646.17	-0.772	0.179	-4.324	1.5e-05	0.0002	down	19	ADGRE5	14380501	14408725	adhesion G protein-c...	no	no	no	no
ENSG00000123191	454.631	0.8	0.17	4.699	2.6e-06	4.1e-05	up	13	ATP7B	51930436	52012125	ATPase copper transp...	no	no	no	no
ENSG00000123213	2491.19	-0.457	0.143	-3.201	0.001	0.01	down	5	NLN	65722205	65871725	neurolysin [Source:H...	no	no	no	no
ENSG00000123243	333.446	3.625	0.569	6.371	1.9e-10	7e-09	up	10	ITIH5	7559270	7666998	inter-alpha-trypsin ...	no	no	no	no
ENSG00000123415	708.889	0.242	0.065	3.701	0.00021	0.002	up	12	SMUG1	54121277	54189008	single-strand-select...	no	no	no	no
ENSG00000123453	122.047	-1.667	0.38	-4.383	1.2e-05	0.00016	down	9	SARDH	133663560	133739955	sarcosine dehydrogen...	no	no	no	no
ENSG00000123500	110.155	-2.857	0.376	-7.593	3.1e-14	2.1e-12	down	6	COL10A1	116118909	116158747	collagen type X alph...	no	no	no	no
ENSG00000123572	58.002	23.499	2.503	9.39	6e-21	1e-18	up	X	NRK	105822539	105958610	Nik related kinase [...	no	no	no	yes
ENSG00000123643	1943.76	-0.51	0.156	-3.269	0.001	0.008	down	5	SLC36A1	151437046	151492379	solute carrier famil...	no	no	no	no
ENSG00000123689	138.622	6.79	0.58	11.709	1.1e-31	4.8e-29	up	1	G0S2	209675412	209676390	G0/G1 switch 2 [Sour...	no	no	no	no
ENSG00000123700	91.902	2.107	0.627	3.358	0.00079	0.006	up	17	KCNJ2	70168673	70180044	potassium inwardly r...	no	no	no	no
ENSG00000123836	475.739	-0.865	0.178	-4.869	1.1e-06	2e-05	down	1	PFKFB2	207034366	207081024	6-phosphofructo-2-ki...	no	no	no	no
ENSG00000124126	187.733	-0.743	0.207	-3.585	0.00034	0.003	down	20	PREX1	48624252	48827999	phosphatidylinositol...	no	no	no	no
ENSG00000124134	73.047	2.517	0.406	6.2	5.6e-10	1.9e-08	up	20	KCNS1	45091214	45101127	potassium voltage-ga...	no	no	no	no
ENSG00000124191	678.837	0.719	0.149	4.809	1.5e-06	2.5e-05	up	20	TOX2	43914852	44069616	TOX high mobility gr...	no	no	no	no
ENSG00000124243	416.855	0.629	0.098	6.397	1.6e-10	6e-09	up	20	BCAS4	50794894	50877177	breast carcinoma amp...	no	no	no	no
ENSG00000124275	1296.45	-0.438	0.128	-3.414	0.00064	0.005	down	5	MTRR	7851186	7906025	5-methyltetrahydrofo...	no	no	no	no
ENSG00000124343	1103.54	-1.959	0.444	-4.416	1e-05	0.00014	down	X	XG	2752040	2816500	Xg glycoprotein (Xg ...	no	yes	no	no
ENSG00000124588	1221.69	-0.467	0.087	-5.389	7.1e-08	1.6e-06	down	6	NQO2	2987987	3019755	N-ribosyldihydronico...	no	no	no	no
ENSG00000124749	67.639	1.862	0.448	4.154	3.3e-05	0.00038	up	6	COL21A1	56056590	56394094	collagen type XXI al...	no	no	no	no
ENSG00000124762	17864.1	-0.668	0.13	-5.133	2.8e-07	5.7e-06	down	6	CDKN1A	36676460	36687337	cyclin dependent kin...	no	no	no	no
ENSG00000124788	3197.7	0.396	0.082	4.818	1.5e-06	2.4e-05	up	6	ATXN1	16299112	16761491	ataxin 1 [Source:HGN...	no	no	no	no
ENSG00000124813	1260.51	0.464	0.125	3.715	0.0002	0.002	up	6	RUNX2	45328157	45664349	RUNX family transcri...	no	no	no	no
ENSG00000124875	62.064	2.475	0.631	3.925	8.7e-05	0.00091	up	4	CXCL6	73836640	73849064	C-X-C motif chemokin...	no	no	no	no
ENSG00000125170	1442.44	-0.811	0.18	-4.503	6.7e-06	9.5e-05	down	16	DOK4	57471922	57487327	docking protein 4 [S...	no	no	no	no
ENSG00000125257	1450.21	-0.526	0.145	-3.624	0.00029	0.003	down	13	ABCC4	95019835	95301475	ATP binding cassette...	no	no	no	no
ENSG00000125266	1565.48	0.867	0.239	3.623	0.00029	0.003	up	13	EFNB2	106489745	106535662	ephrin B2 [Source:HG...	no	no	no	no
ENSG00000125347	432.277	0.764	0.159	4.807	1.5e-06	2.6e-05	up	5	IRF1	132440440	132508719	interferon regulator...	no	no	no	no
ENSG00000125354	1741.32	0.479	0.15	3.202	0.001	0.01	up	X	SEPTIN6	119615724	119693370	septin 6 [Source:HGN...	no	no	no	yes
ENSG00000125384	223.722	0.678	0.198	3.417	0.00063	0.005	up	14	PTGER2	52314305	52328598	prostaglandin E rece...	no	no	no	no
ENSG00000125398	654.535	-2.037	0.479	-4.256	2.1e-05	0.00025	down	17	SOX9	72121020	72126416	SRY-box transcriptio...	no	no	no	no
ENSG00000125454	116.551	-0.579	0.167	-3.471	0.00052	0.004	down	17	SLC25A19	75272981	75289510	solute carrier famil...	no	no	no	no
ENSG00000125538	29.054	3.513	0.81	4.339	1.4e-05	0.00018	up	2	IL1B	112829751	112836816	interleukin 1 beta [...	no	no	no	no
ENSG00000125618	86.795	4.391	0.267	16.438	1e-60	2.2e-57	up	2	PAX8	113215997	113278921	paired box 8 [Source...	no	no	no	no
ENSG00000125657	179.982	-1.139	0.34	-3.35	0.00081	0.006	down	19	TNFSF9	6531026	6535924	TNF superfamily memb...	no	no	no	no
ENSG00000125730	63.504	2.563	0.648	3.959	7.5e-05	0.00081	up	19	C3	6677704	6730562	complement C3 [Sourc...	no	no	no	no
ENSG00000125746	800.872	-0.418	0.12	-3.475	0.00051	0.004	down	19	EML2	45606994	45645602	EMAP like 2 [Source:...	no	no	no	no
ENSG00000125818	3756.44	-0.238	0.052	-4.609	4e-06	6.1e-05	down	20	PSMF1	1113240	1189415	proteasome inhibitor...	no	no	no	no
ENSG00000125848	40.77	-1.305	0.308	-4.236	2.3e-05	0.00027	down	20	FLRT3	14322985	14337614	fibronectin leucine ...	no	no	no	no
ENSG00000125877	1439.35	-0.299	0.092	-3.251	0.001	0.008	down	20	ITPA	3208868	3223870	inosine triphosphata...	no	no	no	no
ENSG00000125965	113.176	2.198	0.298	7.389	1.5e-13	9e-12	up	20	GDF5	35433347	35454746	growth differentiati...	no	no	no	no
ENSG00000126467	20.475	-2.978	0.661	-4.505	6.6e-06	9.5e-05	down	19	TSKS	49739753	49763306	testis specific seri...	no	no	no	no
ENSG00000126709	2051.65	1.494	0.405	3.686	0.00023	0.002	up	1	IFI6	27666064	27672212	interferon alpha ind...	no	no	no	no
ENSG00000126778	734.772	1.046	0.191	5.464	4.6e-08	1.1e-06	up	14	SIX1	60643421	60658259	SIX homeobox 1 [Sour...	no	no	no	no
ENSG00000126785	395.198	1.217	0.251	4.855	1.2e-06	2.1e-05	up	14	RHOJ	63204114	63293508	ras homolog family m...	no	no	no	no
ENSG00000126821	904.5	-0.687	0.131	-5.243	1.6e-07	3.3e-06	down	14	SGPP1	63684216	63728065	sphingosine-1-phosph...	no	no	no	no
ENSG00000127415	857.926	-1.046	0.208	-5.036	4.8e-07	9e-06	down	4	IDUA	986997	1004564	alpha-L-iduronidase ...	no	no	no	no
ENSG00000127463	6119.09	-0.32	0.08	-4.001	6.3e-05	0.00069	down	1	EMC1	19215660	19251552	ER membrane protein ...	no	no	no	no
ENSG00000127863	3505.25	1.56	0.19	8.201	2.4e-16	2.1e-14	up	13	TNFRSF19	23570370	23676104	TNF receptor superfa...	no	no	no	no
ENSG00000127952	734.703	0.457	0.1	4.557	5.2e-06	7.7e-05	up	7	STYXL1	75996338	76048004	serine/threonine/tyr...	no	no	no	no
ENSG00000127955	1215.3	-0.885	0.167	-5.286	1.2e-07	2.6e-06	down	7	GNAI1	79768028	80226181	G protein subunit al...	no	no	no	no
ENSG00000128266	116.418	3.475	0.38	9.145	6e-20	8.6e-18	up	22	GNAZ	23070519	23125032	G protein subunit al...	no	no	no	no
ENSG00000128283	4846.47	-0.453	0.135	-3.36	0.00078	0.006	down	22	CDC42EP1	37560480	37569405	CDC42 effector prote...	no	no	no	no
ENSG00000128298	158.056	-2.072	0.238	-8.702	3.3e-18	3.8e-16	down	22	BAIAP2L2	38084652	38111015	BAR/IMD domain conta...	no	no	no	no
ENSG00000128342	240.693	3.771	0.42	8.982	2.7e-19	3.6e-17	up	22	LIF	30240453	30246759	LIF interleukin 6 fa...	no	no	no	no
ENSG00000128510	411.606	1.018	0.202	5.031	4.9e-07	9.2e-06	up	7	CPA4	130293134	130324180	carboxypeptidase A4 ...	no	no	no	no
ENSG00000128567	23167.5	-1.749	0.411	-4.253	2.1e-05	0.00026	down	7	PODXL	131500262	131558217	podocalyxin like [So...	no	no	no	no
ENSG00000128594	108.972	-2.206	0.389	-5.673	1.4e-08	3.6e-07	down	7	LRRC4	128027071	128032107	leucine rich repeat ...	no	no	no	no
ENSG00000128602	764.552	0.807	0.23	3.509	0.00045	0.004	up	7	SMO	129188633	129213545	smoothened, frizzled...	no	no	no	no
ENSG00000128606	150.684	2.018	0.239	8.461	2.7e-17	2.7e-15	up	7	LRRC17	102913000	102945111	leucine rich repeat ...	no	no	no	no
ENSG00000128641	13083.9	-0.448	0.113	-3.963	7.4e-05	0.00079	down	2	MYO1B	191245185	191425389	myosin IB [Source:HG...	no	no	no	no
ENSG00000128656	2870.07	-0.788	0.243	-3.246	0.001	0.008	down	2	CHN1	174798809	175005381	chimerin 1 [Source:H...	no	no	no	no
ENSG00000128683	135.154	-1.589	0.386	-4.119	3.8e-05	0.00044	down	2	GAD1	170813213	170861151	glutamate decarboxyl...	no	no	no	no
ENSG00000128791	8016.38	-0.398	0.11	-3.607	0.00031	0.003	down	18	TWSG1	9334767	9402420	twisted gastrulation...	no	no	no	no
ENSG00000128872	1297.8	-0.682	0.153	-4.469	7.9e-06	0.00011	down	15	TMOD2	51751597	51816363	tropomodulin 2 [Sour...	no	no	no	no
ENSG00000128918	27.985	3.816	1.137	3.356	0.00079	0.006	up	15	ALDH1A2	57953424	58497866	aldehyde dehydrogena...	no	no	no	no
ENSG00000129038	14715.8	0.635	0.148	4.285	1.8e-05	0.00023	up	15	LOXL1	73925989	73952137	lysyl oxidase like 1...	no	no	no	no
ENSG00000129103	6523.76	-0.524	0.15	-3.488	0.00049	0.004	down	7	SUMF2	56064002	56080670	sulfatase modifying ...	no	no	no	no
ENSG00000129235	1023.68	0.586	0.139	4.203	2.6e-05	0.00031	up	17	TXNDC17	6640985	6644541	thioredoxin domain c...	no	no	no	no
ENSG00000129250	10486	-0.56	0.163	-3.427	0.00061	0.005	down	17	KIF1C	4997950	5028401	kinesin family membe...	no	no	no	no
ENSG00000129295	83.473	-1.143	0.241	-4.748	2.1e-06	3.3e-05	down	8	DNAAF11	132570416	132675592	dynein axonemal asse...	no	no	no	no
ENSG00000129347	1081.46	-0.262	0.082	-3.208	0.001	0.009	down	19	KRI1	10553085	10566031	KRI1 homolog [Source...	no	no	no	no
ENSG00000129422	14.446	3.638	0.903	4.028	5.6e-05	0.00062	up	8	MTUS1	17643795	17801094	microtubule associat...	no	no	no	no
ENSG00000129467	230.641	1.169	0.303	3.859	0.00011	0.001	up	14	ADCY4	24318349	24335093	adenylate cyclase 4 ...	no	no	no	no
ENSG00000129625	4850.51	-0.337	0.078	-4.312	1.6e-05	0.00021	down	5	REEP5	112876385	112922289	receptor accessory p...	no	no	no	no
ENSG00000129824	4580.62	1.033	0.147	7.018	2.3e-12	1.2e-10	up	Y	RPS4Y1	2841602	2932000	ribosomal protein S4...	no	no	no	no
ENSG00000129925	3134.01	-0.951	0.202	-4.705	2.5e-06	4e-05	down	16	PGAP6	370788	387113	post-GPI attachment ...	no	no	no	no
ENSG00000130032	32.509	5.844	1.477	3.957	7.6e-05	0.00081	up	X	PRRG3	151694607	151705924	proline rich and Gla...	no	no	no	no
ENSG00000130038	286.703	-0.975	0.179	-5.441	5.3e-08	1.2e-06	down	12	CRACR2A	3606633	3764819	calcium release acti...	no	no	no	no
ENSG00000130165	1281.05	0.331	0.076	4.349	1.4e-05	0.00018	up	19	ELOF1	11551147	11559230	elongation factor 1 ...	no	no	no	no
ENSG00000130176	4903.24	1.351	0.419	3.226	0.001	0.009	up	19	CNN1	11538767	11550323	calponin 1 [Source:H...	no	no	no	no
ENSG00000130303	64.031	3.601	0.664	5.424	5.8e-08	1.3e-06	up	19	BST2	17402939	17405630	bone marrow stromal ...	no	no	no	no
ENSG00000130304	1430.43	-1.043	0.243	-4.301	1.7e-05	0.00021	down	19	SLC27A1	17468769	17506168	solute carrier famil...	no	no	no	no
ENSG00000130309	11280.4	-0.771	0.177	-4.359	1.3e-05	0.00017	down	19	COLGALT1	17555649	17583162	collagen beta(1-O)ga...	no	no	no	no
ENSG00000130413	53.389	1.987	0.336	5.911	3.4e-09	1e-07	up	11	STK33	8391868	8594289	serine/threonine kin...	no	no	no	no
ENSG00000130487	33.881	4.054	0.802	5.059	4.2e-07	8.1e-06	up	22	KLHDC7B	50545899	50551023	kelch domain contain...	no	no	no	no
ENSG00000130522	2901.99	0.627	0.179	3.504	0.00046	0.004	up	19	JUND	18279694	18281622	JunD proto-oncogene,...	no	no	no	no
ENSG00000130529	2376.19	-0.753	0.195	-3.868	0.00011	0.001	down	19	TRPM4	49157741	49211836	transient receptor p...	no	no	no	no
ENSG00000130558	308.059	-1.968	0.342	-5.747	9.1e-09	2.4e-07	down	9	OLFM1	135075422	135121180	olfactomedin 1 [Sour...	no	no	no	no
ENSG00000130589	1625.21	0.962	0.256	3.752	0.00018	0.002	up	20	HELZ2	63558086	63574239	helicase with zinc f...	no	no	no	no
ENSG00000130702	107.036	2.312	0.258	8.975	2.8e-19	3.8e-17	up	20	LAMA5	62307955	62367312	laminin subunit alph...	no	no	no	no
ENSG00000130720	404.825	2.102	0.384	5.476	4.4e-08	1e-06	up	9	FIBCD1	130902438	130939286	fibrinogen C domain ...	no	no	no	no
ENSG00000130751	509.694	-2.616	0.327	-8.007	1.2e-15	9.1e-14	down	19	NPAS1	47019837	47045775	neuronal PAS domain ...	no	no	no	no
ENSG00000130762	69.191	1.355	0.415	3.263	0.001	0.008	up	1	ARHGEF16	3454665	3481113	Rho guanine nucleoti...	no	no	no	no
ENSG00000130787	460.506	0.542	0.162	3.353	0.0008	0.006	up	12	HIP1R	122834453	122862961	huntingtin interacti...	no	no	no	no
ENSG00000130810	137.572	0.56	0.127	4.416	1e-05	0.00014	up	19	PPAN	10106362	10112012	peter pan homolog [S...	no	no	no	no
ENSG00000130830	644.321	-0.472	0.135	-3.508	0.00045	0.004	down	X	MPP1	154778684	154821007	MAGUK p55 scaffold p...	no	no	no	yes
ENSG00000130881	1737.53	-0.796	0.184	-4.317	1.6e-05	0.0002	down	19	LRP3	33177603	33208864	LDL receptor related...	no	no	no	no
ENSG00000130956	1475.65	-0.941	0.162	-5.815	6.1e-09	1.7e-07	down	9	HABP4	96450169	96491336	hyaluronan binding p...	no	no	no	no
ENSG00000131002	2956.21	1.117	0.165	6.768	1.3e-11	5.9e-10	up	Y	TXLNGY	19567382	19604120	taxilin gamma pseudo...	no	no	no	no
ENSG00000131188	113.255	1.077	0.189	5.69	1.3e-08	3.3e-07	up	5	PRR7	177446445	177456286	proline rich 7, syna...	no	no	no	no
ENSG00000131378	4144.52	-0.73	0.104	-7.004	2.5e-12	1.3e-10	down	3	RFTN1	16313574	16514026	raftlin, lipid raft ...	no	no	no	no
ENSG00000131386	1117.14	3.215	0.192	16.753	5.4e-63	2.4e-59	up	3	GALNT15	16174680	16231992	polypeptide N-acetyl...	no	no	no	no
ENSG00000131504	5276.18	-0.563	0.164	-3.427	0.00061	0.005	down	5	DIAPH1	141515016	141619055	diaphanous related f...	no	no	no	no
ENSG00000131669	322.529	0.627	0.158	3.972	7.1e-05	0.00077	up	9	NINJ1	93121496	93134251	ninjurin 1 [Source:H...	no	no	no	no
ENSG00000131797	171.479	1.486	0.18	8.241	1.7e-16	1.5e-14	up	16	CLUHP3	31703168	31708581	clustered mitochondr...	no	no	no	no
ENSG00000131941	74.081	0.934	0.251	3.728	0.00019	0.002	up	19	RHPN2	32978592	33064888	rhophilin Rho GTPase...	no	no	no	no
ENSG00000132000	478.176	-0.836	0.209	-3.992	6.6e-05	0.00071	down	19	PODNL1	13931187	13953392	podocan like 1 [Sour...	no	no	no	no
ENSG00000132003	314.152	1.111	0.244	4.56	5.1e-06	7.6e-05	up	19	ZSWIM4	13795443	13832254	zinc finger SWIM-typ...	no	no	no	no
ENSG00000132170	111.525	3.726	0.823	4.529	5.9e-06	8.6e-05	up	3	PPARG	12287368	12434356	peroxisome prolifera...	no	no	no	no
ENSG00000132205	5296.4	0.767	0.157	4.898	9.7e-07	1.7e-05	up	18	EMILIN2	2847006	2916003	elastin microfibril ...	no	no	no	no
ENSG00000132274	4683.99	-0.649	0.131	-4.956	7.2e-07	1.3e-05	down	11	TRIM22	5689610	5737089	tripartite motif con...	no	no	no	no
ENSG00000132321	41.701	4.534	0.782	5.796	6.8e-09	1.9e-07	up	2	IQCA1	236324147	236507535	IQ motif containing ...	no	no	no	no
ENSG00000132356	4499.79	-0.544	0.072	-7.525	5.3e-14	3.4e-12	down	5	PRKAA1	40759389	40798374	protein kinase AMP-a...	no	no	no	no
ENSG00000132357	370.224	-1.659	0.262	-6.342	2.3e-10	8.3e-09	down	5	CARD6	40841308	40860175	caspase recruitment ...	no	no	no	no
ENSG00000132429	642.268	-0.369	0.093	-3.988	6.7e-05	0.00072	down	6	POPDC3	105157900	105180014	popeye domain contai...	no	no	no	no
ENSG00000132432	3725.93	0.497	0.138	3.602	0.00032	0.003	up	7	SEC61G	54752250	54759974	SEC61 translocon sub...	no	no	no	no
ENSG00000132510	1600.5	0.766	0.227	3.377	0.00073	0.006	up	17	KDM6B	7834217	7854796	lysine demethylase 6...	no	no	no	no
ENSG00000132563	483.205	1.487	0.181	8.216	2.1e-16	1.9e-14	up	5	REEP2	138439057	138446969	receptor accessory p...	no	no	no	no
ENSG00000132639	34.124	2.032	0.52	3.907	9.3e-05	0.00097	up	20	SNAP25	10172395	10308258	synaptosome associat...	no	no	no	no
ENSG00000132640	1130.3	0.476	0.142	3.355	0.00079	0.006	up	20	BTBD3	11890723	11926609	BTB domain containin...	no	no	no	no
ENSG00000132821	51.957	-1.906	0.279	-6.83	8.5e-12	4e-10	down	20	VSTM2L	37903111	37945350	V-set and transmembr...	no	no	no	no
ENSG00000132837	117.741	-0.849	0.202	-4.201	2.7e-05	0.00032	down	5	DMGDH	78997564	79236038	dimethylglycine dehy...	no	no	no	no
ENSG00000132840	552.486	-0.753	0.168	-4.477	7.6e-06	0.00011	down	5	BHMT2	79069767	79090069	betaine--homocystein...	no	no	no	no
ENSG00000132932	41.944	2.703	0.667	4.054	5e-05	0.00056	up	13	ATP8A2	25371974	26025851	ATPase phospholipid ...	no	no	no	no
ENSG00000132938	56.038	-1.424	0.44	-3.238	0.001	0.009	down	13	MTUS2	28820339	29505947	microtubule associat...	no	no	no	no
ENSG00000133019	55.794	3.046	0.647	4.708	2.5e-06	4e-05	up	1	CHRM3	239386565	239915452	cholinergic receptor...	no	no	no	no
ENSG00000133083	162.302	1.226	0.34	3.603	0.00031	0.003	up	13	DCLK1	35768652	36131382	doublecortin like ki...	no	no	no	no
ENSG00000133106	542.403	1.8	0.41	4.389	1.1e-05	0.00015	up	13	EPSTI1	42886388	42992271	epithelial stromal i...	no	no	no	no
ENSG00000133121	1254.9	0.642	0.091	7.042	1.9e-12	9.8e-11	up	13	STARD13	33103137	33350630	StAR related lipid t...	no	no	no	no
ENSG00000133169	83.025	1.811	0.407	4.453	8.5e-06	0.00012	up	X	BEX1	103062651	103064171	brain expressed X-li...	no	no	no	no
ENSG00000133195	567.883	-0.342	0.082	-4.157	3.2e-05	0.00038	down	17	SLC39A11	72645949	73092712	solute carrier famil...	no	no	no	no
ENSG00000133216	722.565	1.986	0.193	10.272	9.4e-25	2.3e-22	up	1	EPHB2	22710839	22921500	EPH receptor B2 [Sou...	no	no	no	no
ENSG00000133433	304.507	1.302	0.191	6.825	8.8e-12	4.1e-10	up	22	GSTT2B	23957414	23961195	glutathione S-transf...	no	no	no	no
ENSG00000133466	1115.76	0.65	0.197	3.3	0.00097	0.007	up	22	C1QTNF6	37180166	37199385	C1q and TNF related ...	no	no	no	no
ENSG00000133687	211.078	1.539	0.341	4.51	6.5e-06	9.3e-05	up	12	TMTC1	29500840	29784759	transmembrane O-mann...	no	no	no	no
ENSG00000133805	450.857	0.7	0.164	4.281	1.9e-05	0.00023	up	11	AMPD3	10308313	10507579	adenosine monophosph...	no	no	no	no
ENSG00000133816	13271.4	0.466	0.117	3.989	6.6e-05	0.00072	up	11	MICAL2	12094008	12359144	microtubule associat...	no	no	no	no
ENSG00000134138	2967.06	0.564	0.168	3.363	0.00077	0.006	up	15	MEIS2	36889204	37101299	Meis homeobox 2 [Sou...	no	no	no	no
ENSG00000134198	435.247	1.727	0.202	8.554	1.2e-17	1.3e-15	up	1	TSPAN2	115048011	115089503	tetraspanin 2 [Sourc...	no	no	no	no
ENSG00000134247	2155.28	1.099	0.184	5.982	2.2e-09	6.7e-08	up	1	PTGFRN	116909916	116990353	prostaglandin F2 rec...	no	no	no	no
ENSG00000134253	160.177	0.773	0.174	4.447	8.7e-06	0.00012	up	1	TRIM45	117111060	117122587	tripartite motif con...	no	no	no	no
ENSG00000134259	939.954	0.852	0.107	7.977	1.5e-15	1.1e-13	up	1	NGF	115285904	115338770	nerve growth factor ...	no	no	no	no
ENSG00000134291	1554.69	-0.425	0.125	-3.407	0.00066	0.005	down	12	TMEM106C	47963569	47968878	transmembrane protei...	no	no	no	no
ENSG00000134318	6103.96	-0.363	0.096	-3.778	0.00016	0.002	down	2	ROCK2	11179759	11348330	Rho associated coile...	no	no	no	no
ENSG00000134321	12.288	6.667	1.473	4.525	6e-06	8.7e-05	up	2	RSAD2	6865557	6898239	radical S-adenosyl m...	no	no	no	no
ENSG00000134326	57.637	3.848	1.207	3.187	0.001	0.01	up	2	CMPK2	6840570	6866635	cytidine/uridine mon...	no	no	no	no
ENSG00000134343	246.81	-3.022	0.579	-5.219	1.8e-07	3.7e-06	down	11	ANO3	26188842	26663289	anoctamin 3 [Source:...	no	no	no	no
ENSG00000134352	12611.5	-0.502	0.142	-3.546	0.00039	0.003	down	5	IL6ST	55935095	55995022	interleukin 6 cytoki...	no	no	no	no
ENSG00000134363	4201.92	-0.828	0.173	-4.79	1.7e-06	2.8e-05	down	5	FST	53480626	53487134	follistatin [Source:...	no	no	no	no
ENSG00000134463	119.602	4.356	0.396	11.002	3.7e-28	1.2e-25	up	10	ECHDC3	11742366	11764070	enoyl-CoA hydratase ...	no	no	no	no
ENSG00000134504	510.46	-0.629	0.121	-5.185	2.2e-07	4.4e-06	down	18	KCTD1	26454910	26657401	potassium channel te...	no	no	no	no
ENSG00000134508	700.155	-1.095	0.275	-3.978	7e-05	0.00075	down	18	CABLES1	23134564	23260470	Cdk5 and Abl enzyme ...	no	no	no	no
ENSG00000134516	746.458	0.708	0.158	4.489	7.1e-06	0.0001	up	5	DOCK2	169637268	170083382	dedicator of cytokin...	no	no	no	no
ENSG00000134531	20698.8	-0.758	0.167	-4.534	5.8e-06	8.4e-05	down	12	EMP1	13196723	13219941	epithelial membrane ...	no	no	no	no
ENSG00000134769	155.466	2.501	0.161	15.491	4e-54	7.5e-51	up	18	DTNA	34493291	34891844	dystrobrevin alpha [...	no	no	no	no
ENSG00000134775	1257.24	-1.09	0.229	-4.749	2e-06	3.3e-05	down	18	FHOD3	36297713	36780220	formin homology 2 do...	no	no	no	no
ENSG00000134830	34.838	-2.164	0.369	-5.867	4.4e-09	1.3e-07	down	19	C5AR2	47332175	47347329	complement C5a recep...	no	no	no	no
ENSG00000134864	190.974	0.502	0.151	3.323	0.00089	0.007	up	13	GGACT	100530164	100589528	gamma-glutamylamine ...	no	no	no	no
ENSG00000134986	4018.8	1.49	0.278	5.365	8.1e-08	1.8e-06	up	5	NREP	111662621	111997464	neuronal regeneratio...	no	no	no	no
ENSG00000135002	798.237	-0.468	0.145	-3.216	0.001	0.009	down	9	RFK	76385526	76394517	riboflavin kinase [S...	no	no	no	no
ENSG00000135049	610.259	-0.676	0.184	-3.672	0.00024	0.002	down	9	AGTPBP1	85546539	85742029	ATP/GTP binding carb...	no	no	no	no
ENSG00000135074	8465.1	1.311	0.282	4.646	3.4e-06	5.2e-05	up	5	ADAM19	157395534	157575775	ADAM metallopeptidas...	no	no	no	no
ENSG00000135090	2024.86	-0.515	0.076	-6.736	1.6e-11	7.3e-10	down	12	TAOK3	118149801	118372907	TAO kinase 3 [Source...	no	no	no	no
ENSG00000135111	4914.72	1.691	0.516	3.279	0.001	0.008	up	12	TBX3	114670255	114684175	T-box transcription ...	no	no	no	no
ENSG00000135218	26.765	-3.674	0.426	-8.615	7e-18	7.6e-16	down	7	CD36	80369575	80679277	CD36 molecule [Sourc...	no	no	no	no
ENSG00000135269	3934.12	1.048	0.197	5.31	1.1e-07	2.3e-06	up	7	TES	116210506	116258783	testin LIM domain pr...	no	no	no	no
ENSG00000135272	3102.29	-0.57	0.154	-3.7	0.00022	0.002	down	7	MDFIC	114922094	115019917	MyoD family inhibito...	no	no	no	no
ENSG00000135299	111.82	-1.383	0.272	-5.09	3.6e-07	6.9e-06	down	6	ANKRD6	89433152	89633834	ankyrin repeat domai...	no	no	no	no
ENSG00000135312	46.884	4.172	1.244	3.354	0.0008	0.006	up	6	HTR1B	77460924	77463491	5-hydroxytryptamine ...	no	no	no	no
ENSG00000135315	440.522	-0.558	0.139	-4.006	6.2e-05	0.00068	down	6	CEP162	84124241	84227643	centrosomal protein ...	no	no	no	no
ENSG00000135318	12807.9	-0.674	0.111	-6.092	1.1e-09	3.6e-08	down	6	NT5E	85449584	85495791	5'-nucleotidase ecto...	no	no	no	no
ENSG00000135333	23.071	21.69	2.891	7.502	6.3e-14	4e-12	up	6	EPHA7	93240020	93419687	EPH receptor A7 [Sou...	no	no	no	no
ENSG00000135362	1097.63	0.809	0.222	3.641	0.00027	0.002	up	11	PRR5L	36296288	36465204	proline rich 5 like ...	no	no	no	no
ENSG00000135424	1403.41	1.177	0.355	3.314	0.00092	0.007	up	12	ITGA7	55684568	55716404	integrin subunit alp...	no	no	no	no
ENSG00000135454	555.01	-0.727	0.185	-3.931	8.4e-05	0.00089	down	12	B4GALNT1	57623409	57633239	beta-1,4-N-acetyl-ga...	no	no	no	no
ENSG00000135469	332.484	0.507	0.129	3.935	8.3e-05	0.00088	up	12	COQ10A	56266890	56270966	coenzyme Q10A [Sourc...	no	no	no	no
ENSG00000135480	4438.26	1.507	0.418	3.605	0.00031	0.003	up	12	KRT7	52232520	52252186	keratin 7 [Source:HG...	no	no	no	no
ENSG00000135540	344.994	-0.944	0.178	-5.303	1.1e-07	2.4e-06	down	6	NHSL1	138422043	138692571	NHS like 1 [Source:H...	no	no	no	no
ENSG00000135617	564.455	-0.529	0.164	-3.236	0.001	0.009	down	2	PRADC1	73228010	73233239	protease associated ...	no	no	no	no
ENSG00000135636	494.83	3.053	0.542	5.628	1.8e-08	4.6e-07	up	2	DYSF	71453561	71686763	dysferlin [Source:HG...	no	no	no	no
ENSG00000135744	76.016	-4.051	0.398	-10.174	2.6e-24	6e-22	down	1	AGT	230690776	230745576	angiotensinogen [Sou...	no	no	no	no
ENSG00000135750	75.592	2.784	0.645	4.315	1.6e-05	0.0002	up	1	KCNK1	233614106	233672514	potassium two pore d...	no	no	no	no
ENSG00000135766	482.685	0.567	0.164	3.463	0.00053	0.004	up	1	EGLN1	231363751	231422287	egl-9 family hypoxia...	no	no	no	no
ENSG00000135838	81.554	-0.955	0.171	-5.585	2.3e-08	5.7e-07	down	1	NPL	182789293	182830384	N-acetylneuraminate ...	no	no	no	no
ENSG00000135842	3506.42	0.707	0.195	3.617	0.0003	0.003	up	1	NIBAN1	184790724	184974508	niban apoptosis regu...	no	no	no	no
ENSG00000135926	7315.86	-0.478	0.103	-4.661	3.1e-06	4.9e-05	down	2	TMBIM1	218274197	218292586	transmembrane BAX in...	no	no	no	no
ENSG00000135929	427.846	0.988	0.202	4.902	9.5e-07	1.7e-05	up	2	CYP27A1	218781749	218815293	cytochrome P450 fami...	no	no	no	no
ENSG00000136114	249.407	-1.066	0.268	-3.981	6.9e-05	0.00074	down	13	THSD1	52377167	52416373	thrombospondin type ...	no	no	no	no
ENSG00000136153	31454.2	-0.794	0.167	-4.768	1.9e-06	3e-05	down	13	LMO7	75620434	75859870	LIM domain 7 [Source...	no	no	no	no
ENSG00000136160	25.519	4.071	1.223	3.33	0.00087	0.007	up	13	EDNRB	77895481	77975529	endothelin receptor ...	no	no	no	no
ENSG00000136231	1051.52	1.124	0.275	4.087	4.4e-05	0.00049	up	7	IGF2BP3	23310209	23470491	insulin like growth ...	no	no	no	no
ENSG00000136235	15672.3	-1.286	0.237	-5.429	5.7e-08	1.3e-06	down	7	GPNMB	23235967	23275108	glycoprotein nmb [So...	no	no	no	no
ENSG00000136383	56.743	1.386	0.324	4.272	1.9e-05	0.00024	up	15	ALPK3	84817356	84873479	alpha kinase 3 [Sour...	no	no	no	no
ENSG00000136425	214.823	0.892	0.228	3.917	9e-05	0.00093	up	15	CIB2	78104606	78131535	calcium and integrin...	no	no	no	no
ENSG00000136478	2094.31	-0.801	0.195	-4.111	3.9e-05	0.00045	down	17	TEX2	64147227	64263260	testis expressed 2 [...	no	no	no	no
ENSG00000136490	778.208	0.645	0.124	5.196	2e-07	4.1e-06	up	17	LIMD2	63695888	63701172	LIM domain containin...	no	no	no	no
ENSG00000136542	12107.3	-0.847	0.132	-6.436	1.2e-10	4.8e-09	down	2	GALNT5	157257705	157318491	polypeptide N-acetyl...	no	no	no	no
ENSG00000136630	103.462	1.134	0.295	3.851	0.00012	0.001	up	1	HLX	220879431	220885059	H2.0 like homeobox [...	no	no	no	no
ENSG00000136710	788.005	-0.385	0.12	-3.203	0.001	0.01	down	2	CCDC115	130337933	130342699	coiled-coil domain c...	no	no	no	no
ENSG00000136720	2707.22	0.634	0.169	3.755	0.00017	0.002	up	2	HS6ST1	128236716	128318868	heparan sulfate 6-O-...	no	no	no	no
ENSG00000136783	1291.21	-0.387	0.088	-4.381	1.2e-05	0.00016	down	9	NIPSNAP3A	104747683	104760120	nipsnap homolog 3A [...	no	no	no	no
ENSG00000136826	1451.55	0.397	0.107	3.71	0.00021	0.002	up	9	KLF4	107484852	107490482	KLF transcription fa...	no	no	no	no
ENSG00000136848	2459.96	-0.767	0.215	-3.572	0.00035	0.003	down	9	DAB2IP	121567057	121785530	DAB2 interacting pro...	no	no	no	no
ENSG00000136856	120.638	-0.813	0.19	-4.28	1.9e-05	0.00023	down	9	SLC2A8	127397138	127408424	solute carrier famil...	no	no	no	no
ENSG00000136867	28.88	-1.979	0.428	-4.62	3.8e-06	5.8e-05	down	9	SLC31A2	113150976	113164140	solute carrier famil...	no	no	no	no
ENSG00000136868	2806.87	-0.486	0.12	-4.047	5.2e-05	0.00058	down	9	SLC31A1	113221544	113264492	solute carrier famil...	no	no	no	no
ENSG00000136960	9698.98	-1.206	0.305	-3.955	7.6e-05	0.00082	down	8	ENPP2	119557086	119673453	ectonucleotide pyrop...	no	no	no	no
ENSG00000136982	294.745	-0.64	0.189	-3.395	0.00069	0.005	down	8	DSCC1	119833976	119855894	DNA replication and ...	no	no	no	no
ENSG00000136999	313.507	-2.175	0.238	-9.145	6e-20	8.6e-18	down	8	CCN3	119416446	119424434	cellular communicati...	no	no	no	no
ENSG00000137094	1176.25	-0.295	0.086	-3.421	0.00062	0.005	down	9	DNAJB5	34989641	34998900	DnaJ heat shock prot...	no	no	no	no
ENSG00000137193	1595.14	1.864	0.295	6.308	2.8e-10	1e-08	up	6	PIM1	37170152	37175428	Pim-1 proto-oncogene...	no	no	no	no
ENSG00000137203	121.335	3.4	0.793	4.286	1.8e-05	0.00023	up	6	TFAP2A	10393186	10419659	transcription factor...	no	no	no	no
ENSG00000137269	148.659	0.723	0.169	4.28	1.9e-05	0.00023	up	6	LRRC1	53794497	53924125	leucine rich repeat ...	no	no	no	no
ENSG00000137309	11259	1.003	0.226	4.437	9.1e-06	0.00012	up	6	HMGA1	34236873	34246231	high mobility group ...	no	no	no	no
ENSG00000137331	1076.65	2.462	0.246	10.027	1.2e-23	2.5e-21	up	6	IER3	30743199	30744548	immediate early resp...	no	no	no	no
ENSG00000137463	97.802	1.033	0.252	4.103	4.1e-05	0.00046	up	4	MGARP	139266165	139280225	mitochondria localiz...	no	no	no	no
ENSG00000137507	3660.86	-1.083	0.165	-6.566	5.2e-11	2.1e-09	down	11	LRRC32	76657524	76670747	leucine rich repeat ...	no	no	no	no
ENSG00000137573	28127.4	-0.837	0.171	-4.889	1e-06	1.8e-05	down	8	SULF1	69466624	69660915	sulfatase 1 [Source:...	no	no	no	no
ENSG00000137714	694.619	-0.425	0.118	-3.616	0.0003	0.003	down	11	FDX1	110429948	110464884	ferredoxin 1 [Source...	no	no	no	no
ENSG00000137727	70.502	-1.777	0.222	-8.008	1.2e-15	9.1e-14	down	11	ARHGAP20	110577042	110713189	Rho GTPase activatin...	no	no	no	no
ENSG00000137824	1487.52	-0.462	0.125	-3.683	0.00023	0.002	down	15	RMDN3	40735884	40755851	regulator of microtu...	no	no	no	no
ENSG00000137842	445.994	-0.492	0.113	-4.339	1.4e-05	0.00018	down	15	TMEM62	43123279	43185144	transmembrane protei...	no	no	no	no
ENSG00000137857	79.596	1.639	0.326	5.028	5e-07	9.3e-06	up	15	DUOX1	45129933	45165576	dual oxidase 1 [Sour...	no	no	no	no
ENSG00000137868	39.925	2.407	0.579	4.156	3.2e-05	0.00038	up	15	STRA6	74179466	74212267	signaling receptor a...	no	no	no	no
ENSG00000137877	112.579	-1.471	0.33	-4.453	8.5e-06	0.00012	down	15	SPTBN5	41848146	41894053	spectrin beta, non-e...	no	no	no	no
ENSG00000137941	983.672	-1.691	0.212	-7.981	1.5e-15	1.1e-13	down	1	TTLL7	83865024	83999150	tubulin tyrosine lig...	no	no	no	no
ENSG00000137944	959.661	0.438	0.086	5.062	4.2e-07	8e-06	up	1	KYAT3	88935773	88992953	kynurenine aminotran...	no	no	no	no
ENSG00000137960	66.17	-1.598	0.365	-4.381	1.2e-05	0.00016	down	1	GIPC2	77979542	78138444	GIPC PDZ domain cont...	no	no	no	no
ENSG00000138031	2084.85	-0.757	0.15	-5.045	4.5e-07	8.6e-06	down	2	ADCY3	24819169	24920237	adenylate cyclase 3 ...	no	no	no	no
ENSG00000138078	2106.81	-0.395	0.109	-3.619	0.0003	0.003	down	2	PREPL	44316281	44361862	prolyl endopeptidase...	no	no	no	no
ENSG00000138111	75.654	2.481	0.184	13.469	2.4e-41	1.8e-38	up	10	MFSD13A	102461395	102477045	major facilitator su...	no	no	no	no
ENSG00000138119	46481.7	-0.513	0.113	-4.555	5.2e-06	7.7e-05	down	10	MYOF	93306429	93482334	myoferlin [Source:HG...	no	no	no	no
ENSG00000138193	345.752	-1.087	0.146	-7.417	1.2e-13	7.4e-12	down	10	PLCE1	93993931	94332823	phospholipase C epsi...	no	no	no	no
ENSG00000138336	339.281	0.851	0.25	3.407	0.00066	0.005	up	10	TET1	68560337	68694487	tet methylcytosine d...	no	no	no	no
ENSG00000138347	291.681	-1.089	0.266	-4.088	4.4e-05	0.00049	down	10	MYPN	68087897	68212017	myopalladin [Source:...	no	no	no	no
ENSG00000138411	1140.59	-0.958	0.169	-5.654	1.6e-08	4e-07	down	2	HECW2	196189099	196593684	HECT, C2 and WW doma...	no	no	no	no
ENSG00000138468	991.701	0.509	0.094	5.41	6.3e-08	1.4e-06	up	3	SENP7	101324205	101513241	SUMO specific peptid...	no	no	no	no
ENSG00000138496	1467.85	0.783	0.215	3.641	0.00027	0.002	up	3	PARP9	122527924	122564577	poly(ADP-ribose) pol...	no	no	no	no
ENSG00000138604	1178.31	-0.513	0.135	-3.795	0.00015	0.001	down	15	GLCE	69160584	69272217	glucuronic acid epim...	no	no	no	no
ENSG00000138606	82.161	1.011	0.277	3.653	0.00026	0.002	up	15	SHF	45167214	45201175	Src homology 2 domai...	no	no	no	no
ENSG00000138623	9574.37	-1.099	0.224	-4.895	9.8e-07	1.7e-05	down	15	SEMA7A	74409289	74433958	semaphorin 7A (John ...	no	no	no	no
ENSG00000138642	342.229	2.297	0.413	5.56	2.7e-08	6.5e-07	up	4	HERC6	88378739	88443097	HECT and RLD domain ...	no	no	no	no
ENSG00000138650	252.152	2.821	0.611	4.617	3.9e-06	5.9e-05	up	4	PCDH10	133149294	133208606	protocadherin 10 [So...	no	no	no	no
ENSG00000138674	21578.3	-0.256	0.076	-3.367	0.00076	0.006	down	4	SEC31A	82818509	82901166	SEC31 homolog A, COP...	no	no	no	no
ENSG00000138735	1510.27	0.84	0.233	3.61	0.00031	0.003	up	4	PDE5A	119494397	119628804	phosphodiesterase 5A...	no	no	no	no
ENSG00000138744	944.316	-0.874	0.146	-6.004	1.9e-09	5.9e-08	down	4	NAAA	75913660	75941013	N-acylethanolamine a...	no	no	no	no
ENSG00000138756	1260.43	-0.758	0.217	-3.497	0.00047	0.004	down	4	BMP2K	78776342	78916365	BMP2 inducible kinas...	no	no	no	no
ENSG00000138759	2720.23	-0.912	0.264	-3.452	0.00056	0.004	down	4	FRAS1	78057323	78544269	Fraser extracellular...	no	no	no	no
ENSG00000138771	5072.99	0.954	0.214	4.464	8.1e-06	0.00011	up	4	SHROOM3	76435229	76783253	shroom family member...	no	no	no	no
ENSG00000138796	1084.27	-0.567	0.129	-4.387	1.2e-05	0.00015	down	4	HADH	107989714	108035241	hydroxyacyl-CoA dehy...	no	no	no	no
ENSG00000138798	90.881	1.294	0.405	3.196	0.001	0.01	up	4	EGF	109912883	110013766	epidermal growth fac...	no	no	no	no
ENSG00000138821	105.887	-1.18	0.28	-4.211	2.5e-05	0.0003	down	4	SLC39A8	102251080	102431258	solute carrier famil...	no	no	no	no
ENSG00000138829	26203.3	1.177	0.298	3.946	7.9e-05	0.00085	up	5	FBN2	128257909	128659185	fibrillin 2 [Source:...	no	no	no	no
ENSG00000138944	560.504	-1.034	0.306	-3.38	0.00072	0.006	down	22	SHISAL1	44243665	44312951	shisa like 1 [Source...	no	no	no	no
ENSG00000139116	232.785	-0.821	0.192	-4.269	2e-05	0.00024	down	12	KIF21A	39293228	39443390	kinesin family membe...	no	no	no	no
ENSG00000139182	870.677	0.676	0.194	3.482	0.0005	0.004	up	12	CLSTN3	7129698	7158945	calsyntenin 3 [Sourc...	no	no	no	no
ENSG00000139200	107.694	0.934	0.18	5.186	2.1e-07	4.4e-06	up	12	PIANP	6693791	6700815	PILR alpha associate...	no	no	no	no
ENSG00000139211	3517.5	0.922	0.201	4.579	4.7e-06	6.9e-05	up	12	AMIGO2	47075707	47079959	adhesion molecule wi...	no	no	no	no
ENSG00000139266	121.348	2.033	0.333	6.114	9.7e-10	3.2e-08	up	12	MARCHF9	57755103	57760411	membrane associated ...	no	no	no	no
ENSG00000139269	109.304	4.061	0.641	6.339	2.3e-10	8.5e-09	up	12	INHBE	57452323	57459280	inhibin subunit beta...	no	no	no	no
ENSG00000139278	5868.64	-0.489	0.152	-3.226	0.001	0.009	down	12	GLIPR1	75480753	75503863	GLI pathogenesis rel...	no	no	no	no
ENSG00000139292	143.469	-1.595	0.479	-3.329	0.00087	0.007	down	12	LGR5	71439798	71586310	leucine rich repeat ...	no	no	no	no
ENSG00000139304	97.237	-1.27	0.31	-4.098	4.2e-05	0.00047	down	12	PTPRQ	80402178	80680273	protein tyrosine pho...	no	no	no	no
ENSG00000139318	694.52	1.027	0.316	3.246	0.001	0.008	up	12	DUSP6	89347235	89352501	dual specificity pho...	no	no	no	no
ENSG00000139410	157.861	-0.942	0.229	-4.109	4e-05	0.00045	down	12	SDSL	113422380	113438276	serine dehydratase l...	no	no	no	no
ENSG00000139793	4374.46	-0.434	0.079	-5.473	4.4e-08	1e-06	down	13	MBNL2	97221434	97394120	muscleblind like spl...	no	no	no	no
ENSG00000139874	2150.53	-1.269	0.187	-6.777	1.2e-11	5.6e-10	down	14	SSTR1	38207904	38213067	somatostatin recepto...	no	no	no	no
ENSG00000139910	131.832	3.849	0.858	4.488	7.2e-06	0.0001	up	14	NOVA1	26443090	26598033	NOVA alternative spl...	no	no	no	no
ENSG00000139926	32347.5	-0.362	0.108	-3.34	0.00084	0.006	down	14	FRMD6	51489100	51730727	FERM domain containi...	no	no	no	no
ENSG00000139946	381.79	1.633	0.257	6.363	2e-10	7.3e-09	up	14	PELI2	56117814	56301524	pellino E3 ubiquitin...	no	no	no	no
ENSG00000139970	30.341	-3.145	0.7	-4.492	7.1e-06	0.0001	down	14	RTN1	59595976	59870776	reticulon 1 [Source:...	no	no	no	no
ENSG00000139973	29.013	4.821	0.967	4.987	6.1e-07	1.1e-05	up	14	SYT16	61811974	62112550	synaptotagmin 16 [So...	no	no	no	no
ENSG00000140092	17401.7	-0.825	0.247	-3.339	0.00084	0.006	down	14	FBLN5	91869411	91947987	fibulin 5 [Source:HG...	no	no	no	no
ENSG00000140280	177.325	-1.047	0.226	-4.633	3.6e-06	5.5e-05	down	15	LYSMD2	51723011	51751585	LysM domain containi...	no	no	no	no
ENSG00000140323	96.635	-1.539	0.2	-7.704	1.3e-14	9.1e-13	down	15	DISP2	40358219	40378621	dispatched RND trans...	no	no	no	no
ENSG00000140332	1616.1	0.552	0.158	3.501	0.00046	0.004	up	15	TLE3	70047790	70098176	TLE family member 3,...	no	no	no	no
ENSG00000140391	6542.3	-0.698	0.187	-3.735	0.00019	0.002	down	15	TSPAN3	77041404	77083984	tetraspanin 3 [Sourc...	no	no	no	no
ENSG00000140511	3109.03	-2.919	0.469	-6.224	4.9e-10	1.7e-08	down	15	HAPLN3	88877294	88895597	hyaluronan and prote...	no	no	no	no
ENSG00000140526	3324.89	-0.678	0.179	-3.788	0.00015	0.001	down	15	ABHD2	89087459	89202355	abhydrolase domain c...	no	no	no	no
ENSG00000140545	39111.5	-1.902	0.292	-6.511	7.5e-11	3e-09	down	15	MFGE8	88898683	88913468	milk fat globule EGF...	no	no	no	no
ENSG00000140563	81.297	1.395	0.396	3.524	0.00043	0.004	up	15	MCTP2	94231538	94483952	multiple C2 and tran...	no	no	no	no
ENSG00000140961	200.925	-0.672	0.173	-3.881	0.0001	0.001	down	16	OSGIN1	83931311	83966332	oxidative stress ind...	no	no	no	no
ENSG00000141052	844.791	4.234	0.969	4.37	1.2e-05	0.00016	up	17	MYOCD	12665890	12768949	myocardin [Source:HG...	no	no	no	no
ENSG00000141198	302.812	1.238	0.206	6.016	1.8e-09	5.5e-08	up	17	TOM1L1	54899387	54961956	target of myb1 like ...	no	no	no	no
ENSG00000141424	5198.11	-0.407	0.095	-4.259	2.1e-05	0.00025	down	18	SLC39A6	36108531	36129385	solute carrier famil...	no	no	no	no
ENSG00000141562	1525.66	0.562	0.153	3.679	0.00023	0.002	up	17	NARF	82458180	82490537	nuclear prelamin A r...	no	no	no	no
ENSG00000141682	411.249	1.106	0.24	4.608	4.1e-06	6.1e-05	up	18	PMAIP1	59899996	59904305	phorbol-12-myristate...	no	no	no	no
ENSG00000141753	40655.6	-1.34	0.253	-5.289	1.2e-07	2.6e-06	down	17	IGFBP4	40443450	40457725	insulin like growth ...	no	no	no	no
ENSG00000141934	90.003	2.404	0.196	12.269	1.3e-34	6.7e-32	up	19	PLPP2	281040	291403	phospholipid phospha...	no	no	no	no
ENSG00000142149	522.84	1.508	0.231	6.52	7e-11	2.8e-09	up	21	HUNK	31873020	32044633	hormonally up-regula...	no	no	no	no
ENSG00000142207	2284.23	-0.654	0.151	-4.326	1.5e-05	0.00019	down	21	URB1	32311018	32393012	URB1 ribosome biogen...	no	no	no	no
ENSG00000142235	48.403	2.256	0.251	8.999	2.3e-19	3.2e-17	up	19	LMTK3	48485271	48513935	lemur tyrosine kinas...	no	no	no	no
ENSG00000142303	1180.8	1.052	0.224	4.691	2.7e-06	4.3e-05	up	19	ADAMTS10	8580240	8610735	ADAM metallopeptidas...	no	no	no	no
ENSG00000142396	196.476	0.603	0.115	5.24	1.6e-07	3.3e-06	up	19	ERVK3-1	58305374	58316812	endogenous retroviru...	no	no	no	no
ENSG00000142444	421.948	0.35	0.093	3.765	0.00017	0.002	up	19	TIMM29	10928811	10933535	translocase of inner...	no	no	no	no
ENSG00000142611	54.84	3.171	0.587	5.398	6.7e-08	1.5e-06	up	1	PRDM16	3069168	3438621	PR/SET domain 16 [So...	no	no	no	no
ENSG00000142621	99.473	-1.785	0.305	-5.845	5.1e-09	1.4e-07	down	1	FHAD1	15236521	15400283	forkhead associated ...	no	no	no	no
ENSG00000142657	4459.57	-0.656	0.196	-3.347	0.00082	0.006	down	1	PGD	10398592	10420511	phosphogluconate deh...	no	no	no	no
ENSG00000142910	547.247	-2.412	0.481	-5.013	5.3e-07	1e-05	down	1	TINAGL1	31576485	31587686	tubulointerstitial n...	no	no	no	no
ENSG00000143127	573.203	1.068	0.252	4.241	2.2e-05	0.00027	up	1	ITGA10	145891208	145910111	integrin subunit alp...	no	no	no	no
ENSG00000143153	1933.6	-0.621	0.193	-3.216	0.001	0.009	down	1	ATP1B1	169105697	169310992	ATPase Na+/K+ transp...	no	no	no	no
ENSG00000143162	961.6	-0.759	0.206	-3.686	0.00023	0.002	down	1	CREG1	167529117	167553805	cellular repressor o...	no	no	no	no
ENSG00000143190	481.864	0.471	0.132	3.555	0.00038	0.003	up	1	POU2F1	167220876	167427345	POU class 2 homeobox...	no	no	no	no
ENSG00000143337	3044.56	-0.437	0.116	-3.76	0.00017	0.002	down	1	TOR1AIP1	179882042	179920077	torsin 1A interactin...	no	no	no	no
ENSG00000143387	15175.1	-1.361	0.262	-5.205	1.9e-07	4e-06	down	1	CTSK	150794880	150809577	cathepsin K [Source:...	no	no	no	no
ENSG00000143429	349.006	0.8	0.176	4.545	5.5e-06	8e-05	up	2	LSP1P4	91636684	91659961	LSP1 pseudogene 4 [S...	no	no	no	no
ENSG00000143479	1401.47	-0.465	0.145	-3.205	0.001	0.009	down	1	DYRK3	206635536	206684419	dual specificity tyr...	no	no	no	no
ENSG00000143507	1183.62	-0.891	0.114	-7.829	4.9e-15	3.6e-13	down	1	DUSP10	221701424	221742089	dual specificity pho...	no	no	no	no
ENSG00000143554	534.222	-0.807	0.167	-4.828	1.4e-06	2.3e-05	down	1	SLC27A3	153774354	153780157	solute carrier famil...	no	no	no	no
ENSG00000143702	4563.6	-0.804	0.197	-4.09	4.3e-05	0.00049	down	1	CEP170	243124428	243255348	centrosomal protein ...	no	no	no	no
ENSG00000143753	7930.02	-0.334	0.099	-3.375	0.00074	0.006	down	1	DEGS1	224175756	224193441	delta 4-desaturase, ...	no	no	no	no
ENSG00000143772	239.436	-0.516	0.149	-3.46	0.00054	0.004	down	1	ITPKB	226631690	226739323	inositol-trisphospha...	no	no	no	no
ENSG00000143801	248.922	-0.854	0.233	-3.666	0.00025	0.002	down	1	PSEN2	226870184	226927726	presenilin 2 [Source...	no	no	no	no
ENSG00000143819	1420.11	-1.213	0.272	-4.455	8.4e-06	0.00012	down	1	EPHX1	225810124	225845563	epoxide hydrolase 1 ...	no	no	no	no
ENSG00000143842	409.833	-0.555	0.156	-3.56	0.00037	0.003	down	1	SOX13	204073115	204127743	SRY-box transcriptio...	no	no	no	no
ENSG00000143845	63.989	1.573	0.409	3.843	0.00012	0.001	up	1	ETNK2	204131062	204152044	ethanolamine kinase ...	no	no	no	no
ENSG00000143847	1507.4	0.836	0.216	3.874	0.00011	0.001	up	1	PPFIA4	203026491	203078740	PTPRF interacting pr...	no	no	no	no
ENSG00000143850	194.156	3.54	0.548	6.456	1.1e-10	4.2e-09	up	1	PLEKHA6	204218853	204377665	pleckstrin homology ...	no	no	no	no
ENSG00000143867	558.385	-1.145	0.208	-5.519	3.4e-08	8.1e-07	down	2	OSR1	19351485	19358623	odd-skipped related ...	no	no	no	no
ENSG00000143878	8140.73	0.754	0.236	3.196	0.001	0.01	up	2	RHOB	20447074	20449440	ras homolog family m...	no	no	no	no
ENSG00000144026	946.536	0.503	0.138	3.656	0.00026	0.002	up	2	ZNF514	95122087	95165668	zinc finger protein ...	no	no	no	no
ENSG00000144057	282.827	5.548	0.978	5.675	1.4e-08	3.6e-07	up	2	ST6GAL2	106801600	106887108	ST6 beta-galactoside...	no	no	no	no
ENSG00000144063	406.795	1.14	0.336	3.394	0.00069	0.005	up	2	MALL	110083870	110116022	mal, T cell differen...	no	no	no	no
ENSG00000144199	98.164	1.04	0.264	3.943	8.1e-05	0.00086	up	2	FAHD2B	97083583	97094882	fumarylacetoacetate ...	no	no	no	no
ENSG00000144369	914.4	-0.47	0.147	-3.202	0.001	0.01	down	2	FAM171B	186694060	186765959	family with sequence...	no	no	no	no
ENSG00000144401	312.119	0.764	0.213	3.588	0.00033	0.003	up	2	METTL21A	207580631	207625928	methyltransferase 21...	no	no	no	no
ENSG00000144476	769.671	3.225	0.503	6.414	1.4e-10	5.5e-09	up	2	ACKR3	236567787	236582354	atypical chemokine r...	no	no	no	no
ENSG00000144596	41.057	-1.564	0.448	-3.488	0.00049	0.004	down	3	GRIP2	14489107	14556075	glutamate receptor i...	no	no	no	no
ENSG00000144655	921.494	0.764	0.201	3.794	0.00015	0.001	up	3	CSRNP1	39141855	39154562	cysteine and serine ...	no	no	no	no
ENSG00000144668	47.952	-1.578	0.274	-5.749	9e-09	2.4e-07	down	3	ITGA9	37452115	37823507	integrin subunit alp...	no	no	no	no
ENSG00000144677	1641.1	-0.652	0.15	-4.332	1.5e-05	0.00019	down	3	CTDSPL	37861880	37984469	CTD small phosphatas...	no	no	no	no
ENSG00000144746	5410.18	-0.602	0.097	-6.194	5.9e-10	2e-08	down	3	ARL6IP5	69084937	69106092	ADP ribosylation fac...	no	no	no	no
ENSG00000144802	988.961	0.964	0.165	5.824	5.7e-09	1.6e-07	up	3	NFKBIZ	101827991	101861022	NFKB inhibitor zeta ...	no	no	no	no
ENSG00000144815	2170.61	-0.356	0.104	-3.414	0.00064	0.005	down	3	NXPE3	101779177	101843743	neurexophilin and PC...	no	no	no	no
ENSG00000144959	1347.32	-1.031	0.2	-5.159	2.5e-07	5e-06	down	3	NCEH1	172630249	172711218	neutral cholesterol ...	no	no	no	no
ENSG00000145040	112.835	1.911	0.36	5.315	1.1e-07	2.3e-06	up	3	UCN2	48561718	48563781	urocortin 2 [Source:...	no	no	no	no
ENSG00000145246	2325.34	-0.324	0.098	-3.295	0.00099	0.007	down	4	ATP10D	47485275	47593486	ATPase phospholipid ...	no	no	no	no
ENSG00000145247	246.034	1.147	0.118	9.734	2.2e-22	4.4e-20	up	4	OCIAD2	48885019	48906937	OCIA domain containi...	no	no	no	no
ENSG00000145391	7116.33	-0.406	0.096	-4.247	2.2e-05	0.00026	down	4	SETD7	139495941	139606699	SET domain containin...	no	no	no	no
ENSG00000145423	4762.38	3.953	0.815	4.851	1.2e-06	2.1e-05	up	4	SFRP2	153780591	153789083	secreted frizzled re...	no	no	no	no
ENSG00000145476	996.172	-0.888	0.146	-6.075	1.2e-09	3.9e-08	down	4	CYP4V2	186191567	186213463	cytochrome P450 fami...	no	no	no	no
ENSG00000145506	15.464	7	1.651	4.24	2.2e-05	0.00027	up	5	NKD2	1008802	1038943	NKD inhibitor of WNT...	no	no	no	no
ENSG00000145536	34.983	4.745	1.353	3.508	0.00045	0.004	up	5	ADAMTS16	5140330	5320304	ADAM metallopeptidas...	no	no	no	no
ENSG00000145604	1535.33	-1.162	0.204	-5.681	1.3e-08	3.5e-07	down	5	SKP2	36151989	36196849	S-phase kinase assoc...	no	no	no	no
ENSG00000145623	7161.31	0.693	0.136	5.08	3.8e-07	7.3e-06	up	5	OSMR	38845858	38945596	oncostatin M recepto...	no	no	no	no
ENSG00000145632	3028.61	0.912	0.06	15.256	1.5e-52	2.2e-49	up	5	PLK2	58453982	58460139	polo like kinase 2 [...	no	no	no	no
ENSG00000145736	230.241	-0.94	0.199	-4.735	2.2e-06	3.5e-05	down	5	GTF2H2	71035016	71067689	general transcriptio...	no	no	no	no
ENSG00000145779	711.239	-1.193	0.263	-4.535	5.8e-06	8.4e-05	down	5	TNFAIP8	119268692	119399688	TNF alpha induced pr...	no	no	no	no
ENSG00000145824	116.27	3.155	0.49	6.442	1.2e-10	4.6e-09	up	5	CXCL14	135570679	135579279	C-X-C motif chemokin...	no	no	no	no
ENSG00000145861	87.658	-1.182	0.224	-5.285	1.3e-07	2.6e-06	down	5	C1QTNF2	160347754	160370641	C1q and TNF related ...	no	no	no	no
ENSG00000145901	4205.52	0.611	0.117	5.243	1.6e-07	3.3e-06	up	5	TNIP1	151029945	151093577	TNFAIP3 interacting ...	no	no	no	no
ENSG00000145936	248.283	4.368	1.304	3.349	0.00081	0.006	up	5	KCNMB1	170374671	170389634	potassium calcium-ac...	no	no	no	no
ENSG00000145982	469.606	-0.552	0.172	-3.21	0.001	0.009	down	6	FARS2	5261044	5829192	phenylalanyl-tRNA sy...	no	no	no	no
ENSG00000146054	68.208	-1.086	0.166	-6.541	6.1e-11	2.5e-09	down	5	TRIM7	181193924	181205293	tripartite motif con...	no	no	no	no
ENSG00000146281	241.032	1.437	0.126	11.39	4.7e-30	1.7e-27	up	6	PM20D2	89146055	89165565	peptidase M20 domain...	no	no	no	no
ENSG00000146376	1531.31	-1.418	0.2	-7.104	1.2e-12	6.5e-11	down	6	ARHGAP18	129576132	129710177	Rho GTPase activatin...	no	no	no	no
ENSG00000146592	268.689	1.88	0.54	3.48	0.0005	0.004	up	7	CREB5	28299321	28825894	cAMP responsive elem...	no	no	no	no
ENSG00000146674	227053	0.833	0.251	3.32	0.0009	0.007	up	7	IGFBP3	45912245	45921874	insulin like growth ...	no	no	no	no
ENSG00000146833	1405.36	-0.415	0.122	-3.413	0.00064	0.005	down	7	TRIM4	99876958	99919531	tripartite motif con...	no	no	no	no
ENSG00000146966	154.862	2.698	0.478	5.642	1.7e-08	4.2e-07	up	7	DENND2A	140518420	140673993	DENN domain containi...	no	no	no	no
ENSG00000147027	7953.47	-0.96	0.169	-5.688	1.3e-08	3.4e-07	down	X	TMEM47	34627075	34657285	transmembrane protei...	no	no	no	no
ENSG00000147041	19.761	3.695	1.089	3.393	0.00069	0.005	up	X	SYTL5	38006553	38128819	synaptotagmin like 5...	no	no	no	yes
ENSG00000147166	55.524	2.07	0.367	5.637	1.7e-08	4.4e-07	up	X	ITGB1BP2	71301750	71305371	integrin subunit bet...	no	no	no	yes
ENSG00000147180	161.622	2.797	0.651	4.297	1.7e-05	0.00022	up	X	ZNF711	85243991	85273362	zinc finger protein ...	no	no	yes	no
ENSG00000147231	118.59	-1.594	0.238	-6.709	2e-11	8.7e-10	down	X	RADX	106611930	106679439	RPA1 related single ...	no	no	no	yes
ENSG00000147234	95.664	-0.909	0.249	-3.644	0.00027	0.002	down	X	FRMPD3	107449652	107605255	FERM and PDZ domain ...	no	no	yes	no
ENSG00000147408	149.943	0.707	0.183	3.87	0.00011	0.001	up	8	CSGALNACT1	19404161	19758029	chondroitin sulfate ...	no	no	no	no
ENSG00000147526	6114.95	-0.292	0.083	-3.509	0.00045	0.004	down	8	TACC1	38728186	38853028	transforming acidic ...	no	no	no	no
ENSG00000147573	324.868	6.454	1.083	5.962	2.5e-09	7.5e-08	up	8	TRIM55	66126896	66175485	tripartite motif con...	no	no	no	no
ENSG00000147852	736.69	0.973	0.229	4.252	2.1e-05	0.00026	up	9	VLDLR	2621182	2660056	very low density lip...	no	no	no	no
ENSG00000147874	1454.17	-0.611	0.175	-3.489	0.00048	0.004	down	9	HAUS6	19053141	19102904	HAUS augmin like com...	no	no	no	no
ENSG00000147883	1163.63	1.087	0.327	3.327	0.00088	0.007	up	9	CDKN2B	22002903	22009305	cyclin dependent kin...	no	no	no	no
ENSG00000147889	380.998	1.857	0.121	15.305	7.1e-53	1.2e-49	up	9	CDKN2A	21967752	21995301	cyclin dependent kin...	no	no	no	no
ENSG00000147955	3524.13	-0.512	0.148	-3.458	0.00054	0.004	down	9	SIGMAR1	34634722	34637844	sigma non-opioid int...	no	no	no	no
ENSG00000148053	567.042	2.852	0.797	3.578	0.00035	0.003	up	9	NTRK2	84668375	85095751	neurotrophic recepto...	no	no	no	no
ENSG00000148110	3176.59	-0.605	0.126	-4.809	1.5e-06	2.5e-05	down	9	MFSD14B	94374569	94461042	major facilitator su...	no	no	no	no
ENSG00000148175	5915.88	-0.556	0.115	-4.837	1.3e-06	2.2e-05	down	9	STOM	121338987	121370304	stomatin [Source:HGN...	no	no	no	no
ENSG00000148344	631.746	-1.142	0.209	-5.475	4.4e-08	1e-06	down	9	PTGES	129738331	129753042	prostaglandin E synt...	no	no	no	no
ENSG00000148484	10219.5	-0.362	0.062	-5.855	4.8e-09	1.4e-07	down	10	RSU1	16590611	16817463	Ras suppressor prote...	no	no	no	no
ENSG00000148541	154.176	1.755	0.19	9.232	2.7e-20	4e-18	up	10	FAM13C	59246130	59363181	family with sequence...	no	no	no	no
ENSG00000148737	1630.21	-0.84	0.226	-3.718	0.0002	0.002	down	10	TCF7L2	112950247	113167678	transcription factor...	no	no	no	no
ENSG00000148842	421.52	0.63	0.167	3.782	0.00016	0.002	up	10	CNNM2	102918294	103090222	cyclin and CBS domai...	no	no	no	no
ENSG00000148848	14276.5	1.115	0.135	8.277	1.3e-16	1.1e-14	up	10	ADAM12	126012381	126388477	ADAM metallopeptidas...	no	no	no	no
ENSG00000148908	793.391	0.426	0.122	3.483	0.0005	0.004	up	10	RGS10	119499817	119542719	regulator of G prote...	no	no	no	no
ENSG00000148926	10632.8	-0.904	0.282	-3.209	0.001	0.009	down	11	ADM	10305073	10307397	adrenomedullin [Sour...	no	no	no	no
ENSG00000149084	1603.94	-0.794	0.092	-8.673	4.2e-18	4.8e-16	down	11	HSD17B12	43680680	43856617	hydroxysteroid 17-be...	no	no	no	no
ENSG00000149090	3142.1	0.933	0.274	3.4	0.00067	0.005	up	11	PAMR1	35431823	35530300	peptidase domain con...	no	no	no	no
ENSG00000149131	4227.9	1.297	0.284	4.574	4.8e-06	7.1e-05	up	11	SERPING1	57597387	57619171	serpin family G memb...	no	no	no	no
ENSG00000149201	190.53	2.392	0.513	4.666	3.1e-06	4.7e-05	up	11	CCDC81	86374736	86423109	coiled-coil domain c...	no	no	no	no
ENSG00000149218	2347.87	-0.72	0.114	-6.299	3e-10	1.1e-08	down	11	ENDOD1	95089846	95132645	endonuclease domain ...	no	no	no	no
ENSG00000149289	653.168	-0.491	0.142	-3.447	0.00057	0.005	down	11	ZC3H12C	110093392	110171841	zinc finger CCCH-typ...	no	no	no	no
ENSG00000149292	150.872	3.36	0.931	3.609	0.00031	0.003	up	11	TTC12	113314579	113383544	tetratricopeptide re...	no	no	no	no
ENSG00000149483	1068.37	-0.51	0.11	-4.62	3.8e-06	5.8e-05	down	11	TMEM138	61361964	61377890	transmembrane protei...	no	no	no	no
ENSG00000149527	40.444	2.225	0.523	4.253	2.1e-05	0.00026	up	1	PLCH2	2425980	2505532	phospholipase C eta ...	no	no	no	no
ENSG00000149531	414.093	0.403	0.12	3.366	0.00076	0.006	up	20	FRG1BP	30377372	30399257	FSHD region gene 1 f...	no	no	no	no
ENSG00000149548	139.658	-0.857	0.259	-3.308	0.00094	0.007	down	11	CCDC15	124954121	125041489	coiled-coil domain c...	no	no	no	no
ENSG00000149557	1285.84	-0.546	0.105	-5.187	2.1e-07	4.3e-06	down	11	FEZ1	125442881	125592568	fasciculation and el...	no	no	no	no
ENSG00000149599	39.011	6.505	1.336	4.871	1.1e-06	1.9e-05	up	20	DUSP15	31847637	31870664	dual specificity pho...	no	no	no	no
ENSG00000149633	281.248	1.734	0.352	4.925	8.4e-07	1.5e-05	up	20	KIAA1755	38210503	38260772	KIAA1755 [Source:HGN...	no	no	no	no
ENSG00000149948	1683.44	0.983	0.26	3.788	0.00015	0.001	up	12	HMGA2	65824460	65966291	high mobility group ...	no	no	no	no
ENSG00000150051	866.37	1.8	0.518	3.477	0.00051	0.004	up	10	MKX	27672874	27746060	mohawk homeobox [Sou...	no	no	no	no
ENSG00000150054	50.5	0.952	0.292	3.256	0.001	0.008	up	10	MPP7	28050993	28334486	MAGUK p55 scaffold p...	no	no	no	no
ENSG00000150281	413.404	0.609	0.15	4.068	4.8e-05	0.00053	up	16	CTF1	30896614	30903547	cardiotrophin 1 [Sou...	no	no	no	no
ENSG00000150556	384.691	-2.191	0.255	-8.578	9.7e-18	1e-15	down	2	LYPD6B	149038107	149215262	LY6/PLAUR domain con...	no	no	no	no
ENSG00000150594	1327.21	-1.636	0.265	-6.168	6.9e-10	2.3e-08	down	10	ADRA2A	111077029	111080907	adrenoceptor alpha 2...	no	no	no	no
ENSG00000150627	54.086	1.477	0.313	4.725	2.3e-06	3.7e-05	up	4	WDR17	176065841	176182818	WD repeat domain 17 ...	no	no	no	no
ENSG00000150782	18.792	-2.624	0.759	-3.455	0.00055	0.004	down	11	IL18	112143253	112164096	interleukin 18 [Sour...	no	no	no	no
ENSG00000150938	32356.9	-0.563	0.13	-4.334	1.5e-05	0.00019	down	2	CRIM1	36355778	36551135	cysteine rich transm...	no	no	no	no
ENSG00000151276	2819.96	-1.297	0.214	-6.071	1.3e-09	4e-08	down	3	MAGI1	65353525	66038918	membrane associated ...	no	no	no	no
ENSG00000151320	1186.3	2.796	0.213	13.151	1.7e-39	1e-36	up	14	AKAP6	32329298	32837684	A-kinase anchoring p...	no	no	no	no
ENSG00000151388	3245.11	-0.728	0.204	-3.578	0.00035	0.003	down	5	ADAMTS12	33523535	33892019	ADAM metallopeptidas...	no	no	no	no
ENSG00000151575	64.363	-0.895	0.197	-4.551	5.3e-06	7.8e-05	down	15	TEX9	56243971	56445997	testis expressed 9 [...	no	no	no	no
ENSG00000151576	771.115	-0.536	0.161	-3.327	0.00088	0.007	down	3	QTRT2	114005833	114088422	queuine tRNA-ribosyl...	no	no	no	no
ENSG00000151612	1909.43	0.466	0.077	6.073	1.3e-09	4e-08	up	4	ZNF827	145757627	145938823	zinc finger protein ...	no	no	no	no
ENSG00000151623	61.356	-4.527	0.47	-9.637	5.6e-22	1.1e-19	down	4	NR3C2	148078762	148444698	nuclear receptor sub...	no	no	no	no
ENSG00000151692	127.201	2.052	0.607	3.379	0.00073	0.006	up	2	RNF144A	6917412	7068286	ring finger protein ...	no	no	no	no
ENSG00000151693	1886.04	-0.442	0.098	-4.507	6.6e-06	9.4e-05	down	2	ASAP2	9206765	9405683	ArfGAP with SH3 doma...	no	no	no	no
ENSG00000151726	1396.03	-0.791	0.179	-4.422	9.8e-06	0.00013	down	4	ACSL1	184755595	184826818	acyl-CoA synthetase ...	no	no	no	no
ENSG00000151892	1657.67	2.769	0.51	5.426	5.8e-08	1.3e-06	up	10	GFRA1	116056925	116276803	GDNF family receptor...	no	no	no	no
ENSG00000152256	2068.55	0.995	0.16	6.232	4.6e-10	1.6e-08	up	2	PDK1	172555373	172608669	pyruvate dehydrogena...	no	no	no	no
ENSG00000152291	16504.1	-0.479	0.065	-7.331	2.3e-13	1.3e-11	down	2	TGOLN2	85318027	85328251	trans-golgi network ...	no	no	no	no
ENSG00000152402	125.133	1.895	0.364	5.213	1.9e-07	3.8e-06	up	11	GUCY1A2	106674019	107018476	guanylate cyclase 1 ...	no	no	no	no
ENSG00000152495	140.995	-0.866	0.202	-4.282	1.9e-05	0.00023	down	5	CAMK4	111223653	111494886	calcium/calmodulin d...	no	no	no	no
ENSG00000152642	328.966	-0.55	0.076	-7.261	3.8e-13	2.2e-11	down	3	GPD1L	32105689	32168709	glycerol-3-phosphate...	no	no	no	no
ENSG00000152661	10640.7	0.958	0.244	3.928	8.6e-05	0.0009	up	6	GJA1	121435595	121449727	gap junction protein...	no	no	no	no
ENSG00000152689	86.325	-1.099	0.169	-6.492	8.4e-11	3.4e-09	down	2	RASGRP3	33436324	33564750	RAS guanyl releasing...	no	no	no	no
ENSG00000152818	7479.5	-0.442	0.131	-3.385	0.00071	0.006	down	6	UTRN	144285335	144853034	utrophin [Source:HGN...	no	no	no	no
ENSG00000152952	15631.6	0.772	0.226	3.419	0.00063	0.005	up	3	PLOD2	146035139	146163725	procollagen-lysine,2...	no	no	no	no
ENSG00000153029	1513.51	-0.991	0.169	-5.856	4.7e-09	1.3e-07	down	1	MR1	181033374	181061938	major histocompatibi...	no	no	no	no
ENSG00000153064	64.239	-1.247	0.328	-3.805	0.00014	0.001	down	4	BANK1	101411286	102074812	B cell scaffold prot...	no	no	no	no
ENSG00000153113	11038.8	-0.432	0.087	-4.936	8e-07	1.4e-05	down	5	CAST	96525267	96779595	calpastatin [Source:...	no	no	no	no
ENSG00000153132	309.806	3.333	0.759	4.391	1.1e-05	0.00015	up	4	CLGN	140388453	140427661	calmegin [Source:HGN...	no	no	no	no
ENSG00000153234	142.633	0.732	0.211	3.478	0.00051	0.004	up	2	NR4A2	156324437	156342348	nuclear receptor sub...	no	no	no	no
ENSG00000153246	1192.71	-0.57	0.174	-3.278	0.001	0.008	down	2	PLA2R1	159932006	160062615	phospholipase A2 rec...	no	no	no	no
ENSG00000153404	228.039	1.478	0.309	4.787	1.7e-06	2.8e-05	up	5	PLEKHG4B	92168	189972	pleckstrin homology ...	no	no	no	no
ENSG00000153904	9013.87	-1.021	0.131	-7.77	7.8e-15	5.5e-13	down	1	DDAH1	85318481	85578363	dimethylarginine dim...	no	no	no	no
ENSG00000153944	959.43	1.045	0.188	5.555	2.8e-08	6.7e-07	up	17	MSI2	57255851	57684689	musashi RNA binding ...	no	no	no	no
ENSG00000153956	1952.98	-0.671	0.142	-4.732	2.2e-06	3.6e-05	down	7	CACNA2D1	81946444	82443956	calcium voltage-gate...	no	no	no	no
ENSG00000153993	1067.34	-0.928	0.273	-3.398	0.00068	0.005	down	7	SEMA3D	84995553	85187056	semaphorin 3D [Sourc...	no	no	no	no
ENSG00000154096	30695.2	-0.637	0.137	-4.655	3.2e-06	5e-05	down	11	THY1	119415476	119424985	Thy-1 cell surface a...	no	no	no	no
ENSG00000154175	2912.97	-1.477	0.208	-7.099	1.3e-12	6.7e-11	down	3	ABI3BP	100749156	100993515	ABI family member 3 ...	no	no	no	no
ENSG00000154188	1702.53	-1.31	0.18	-7.288	3.2e-13	1.8e-11	down	8	ANGPT1	107249482	107498055	angiopoietin 1 [Sour...	no	no	no	no
ENSG00000154217	482.65	-0.766	0.232	-3.3	0.00097	0.007	down	17	PITPNC1	67377281	67697256	phosphatidylinositol...	no	no	no	no
ENSG00000154229	5793.16	0.367	0.115	3.2	0.001	0.01	up	17	PRKCA	66302613	66810743	protein kinase C alp...	no	no	no	no
ENSG00000154237	1567.91	-0.49	0.128	-3.817	0.00014	0.001	down	15	LRRK1	100919327	101078257	leucine rich repeat ...	no	no	no	no
ENSG00000154277	5619.73	1.035	0.279	3.707	0.00021	0.002	up	4	UCHL1	41256413	41268455	ubiquitin C-terminal...	no	no	no	no
ENSG00000154358	253.817	0.917	0.195	4.711	2.5e-06	3.9e-05	up	1	OBSCN	228208044	228378876	obscurin, cytoskelet...	no	no	no	no
ENSG00000154529	295.054	25.77	2.778	9.277	1.7e-20	2.7e-18	up	9	CNTNAP3B	41890314	42129510	contactin associated...	no	no	no	no
ENSG00000154608	46.873	-1.114	0.229	-4.854	1.2e-06	2.1e-05	down	4	CEP170P1	118467590	118554100	centrosomal protein ...	no	no	no	no
ENSG00000154678	2056.01	-0.819	0.196	-4.179	2.9e-05	0.00034	down	7	PDE1C	31751179	32428131	phosphodiesterase 1C...	no	no	no	no
ENSG00000154734	11388	-0.782	0.173	-4.522	6.1e-06	8.8e-05	down	21	ADAMTS1	26835755	26845409	ADAM metallopeptidas...	no	no	no	no
ENSG00000154736	2457.1	-0.699	0.178	-3.918	8.9e-05	0.00093	down	21	ADAMTS5	26917922	26967088	ADAM metallopeptidas...	no	no	no	no
ENSG00000154803	1765.84	-0.986	0.253	-3.904	9.4e-05	0.00098	down	17	FLCN	17212212	17237188	folliculin [Source:H...	no	no	no	no
ENSG00000154856	491.327	2.815	0.33	8.518	1.6e-17	1.7e-15	up	18	APCDD1	10454635	10489949	APC down-regulated 1...	no	no	no	no
ENSG00000154874	303.398	-2.099	0.265	-7.913	2.5e-15	1.9e-13	down	17	CCDC144BP	18542155	18625447	coiled-coil domain c...	no	no	no	no
ENSG00000154930	351.414	-0.865	0.232	-3.724	0.0002	0.002	down	20	ACSS1	25006230	25058980	acyl-CoA synthetase ...	no	no	no	no
ENSG00000155016	852.252	-1.324	0.191	-6.944	3.8e-12	1.9e-10	down	4	CYP2U1	107931549	107953461	cytochrome P450 fami...	no	no	no	no
ENSG00000155099	720.45	-0.481	0.141	-3.401	0.00067	0.005	down	8	PIP4P2	90993802	91040872	phosphatidylinositol...	no	no	no	no
ENSG00000155254	8467.83	-0.273	0.043	-6.388	1.7e-10	6.4e-09	down	10	MARVELD1	97713173	97718150	MARVEL domain contai...	no	no	no	no
ENSG00000155324	2415.6	-1.292	0.147	-8.769	1.8e-18	2.2e-16	down	5	GRAMD2B	126360132	126496494	GRAM domain containi...	no	no	no	no
ENSG00000155363	2602.35	0.658	0.146	4.516	6.3e-06	9e-05	up	1	MOV10	112673141	112700756	Mov10 RISC complex R...	no	no	no	no
ENSG00000155592	339.694	0.396	0.112	3.526	0.00042	0.004	up	16	ZKSCAN2	25236001	25257845	zinc finger with KRA...	no	no	no	no
ENSG00000155657	354.972	0.725	0.204	3.563	0.00037	0.003	up	2	TTN	178525989	178830802	titin [Source:HGNC S...	no	no	no	no
ENSG00000155754	68.044	-0.982	0.19	-5.163	2.4e-07	4.9e-06	down	2	C2CD6	201487421	201619178	C2 calcium dependent...	no	no	no	no
ENSG00000155792	348.633	-2.594	0.306	-8.489	2.1e-17	2.2e-15	down	8	DEPTOR	119873717	120050918	DEP domain containin...	no	no	no	no
ENSG00000155816	4634.93	-0.482	0.138	-3.48	0.0005	0.004	down	1	FMN2	240014348	240475187	formin 2 [Source:HGN...	no	no	no	no
ENSG00000155846	45.03	-2.72	0.49	-5.548	2.9e-08	6.9e-07	down	5	PPARGC1B	149730298	149855022	PPARG coactivator 1 ...	no	no	no	no
ENSG00000155893	452.828	1.346	0.181	7.453	9.1e-14	5.7e-12	up	3	PXYLP1	141228726	141367753	2-phosphoxylose phos...	no	no	no	no
ENSG00000155962	61.947	1.798	0.537	3.351	0.00081	0.006	up	X	CLIC2	155276211	155334657	chloride intracellul...	no	no	no	yes
ENSG00000155980	130.85	0.857	0.172	4.992	6e-07	1.1e-05	up	12	KIF5A	57546026	57586633	kinesin family membe...	no	no	no	no
ENSG00000156011	4206.94	0.661	0.138	4.784	1.7e-06	2.8e-05	up	8	PSD3	18527303	19084730	pleckstrin and Sec7 ...	no	no	no	no
ENSG00000156030	1676.69	0.361	0.097	3.728	0.00019	0.002	up	14	MIDEAS	73715122	73790285	mitotic deacetylase ...	no	no	no	no
ENSG00000156136	1230.99	-0.74	0.214	-3.458	0.00054	0.004	down	4	DCK	70992538	71030914	deoxycytidine kinase...	no	no	no	no
ENSG00000156140	58.751	1.162	0.266	4.361	1.3e-05	0.00017	up	4	ADAMTS3	72280969	72569221	ADAM metallopeptidas...	no	no	no	no
ENSG00000156265	600.879	1.497	0.131	11.399	4.2e-30	1.5e-27	up	21	MAP3K7CL	29077471	29175889	MAP3K7 C-terminal li...	no	no	no	no
ENSG00000156273	2415.49	0.908	0.216	4.2	2.7e-05	0.00032	up	21	BACH1	29194071	29630751	BTB domain and CNC h...	no	no	no	no
ENSG00000156381	549.527	-0.562	0.171	-3.285	0.001	0.007	down	14	ANKRD9	102501767	102509799	ankyrin repeat domai...	no	no	no	no
ENSG00000156414	135.166	-3.769	0.444	-8.496	2e-17	2e-15	down	14	TDRD9	103928456	104052667	tudor domain contain...	no	no	no	no
ENSG00000156453	342.731	3.857	0.401	9.609	7.3e-22	1.4e-19	up	5	PCDH1	141853090	141879246	protocadherin 1 [Sou...	no	no	no	no
ENSG00000156463	83.052	1.19	0.245	4.857	1.2e-06	2.1e-05	up	5	SH3RF2	145936578	146081791	SH3 domain containin...	no	no	no	no
ENSG00000156515	9540.95	-0.411	0.103	-3.989	6.6e-05	0.00072	down	10	HK1	69269984	69401884	hexokinase 1 [Source...	no	no	no	no
ENSG00000156802	1985.22	-0.699	0.204	-3.428	0.00061	0.005	down	8	ATAD2	123319850	123416350	ATPase family AAA do...	no	no	no	no
ENSG00000156876	319.525	-0.572	0.163	-3.501	0.00046	0.004	down	1	SASS6	100083563	100132955	SAS-6 centriolar ass...	no	no	no	no
ENSG00000157064	228.538	-0.999	0.182	-5.476	4.4e-08	1e-06	down	1	NMNAT2	183248237	183418380	nicotinamide nucleot...	no	no	no	no
ENSG00000157111	335.952	-1.023	0.18	-5.679	1.4e-08	3.5e-07	down	5	TMEM171	73120569	73131809	transmembrane protei...	no	no	no	no
ENSG00000157193	443.036	-0.785	0.206	-3.81	0.00014	0.001	down	1	LRP8	53242364	53328469	LDL receptor related...	no	no	no	no
ENSG00000157227	52042.4	-0.46	0.106	-4.347	1.4e-05	0.00018	down	14	MMP14	22836560	22849041	matrix metallopeptid...	no	no	no	no
ENSG00000157483	6492.25	-0.43	0.124	-3.458	0.00054	0.004	down	15	MYO1E	59132434	59372871	myosin IE [Source:HG...	no	no	no	no
ENSG00000157510	410.19	0.546	0.153	3.559	0.00037	0.003	up	5	AFAP1L1	149271859	149343637	actin filament assoc...	no	no	no	no
ENSG00000157551	155.649	1.244	0.285	4.361	1.3e-05	0.00017	up	21	KCNJ15	38155549	38307357	potassium inwardly r...	no	no	no	no
ENSG00000157554	84.642	-3.2	0.304	-10.531	6.2e-26	1.7e-23	down	21	ERG	38380027	38661780	ETS transcription fa...	no	no	no	no
ENSG00000157601	996.297	2.245	0.517	4.339	1.4e-05	0.00019	up	21	MX1	41420020	41470071	MX dynamin like GTPa...	no	no	no	no
ENSG00000157617	1880.65	-0.525	0.136	-3.869	0.00011	0.001	down	21	C2CD2	41885112	41954018	C2 calcium dependent...	no	no	no	no
ENSG00000157680	712.633	0.77	0.22	3.493	0.00048	0.004	up	7	DGKI	137381037	137847092	diacylglycerol kinas...	no	no	no	no
ENSG00000157782	35.832	6.349	0.781	8.126	4.4e-16	3.7e-14	up	12	CABP1	120640626	120667324	calcium binding prot...	no	no	no	no
ENSG00000157833	401.348	2.156	0.598	3.608	0.00031	0.003	up	2	GAREM2	26173088	26189663	GRB2 associated regu...	no	no	no	no
ENSG00000157873	519.623	-0.959	0.2	-4.794	1.6e-06	2.7e-05	down	1	TNFRSF14	2555639	2565382	TNF receptor superfa...	no	no	no	no
ENSG00000158050	177.849	1.466	0.369	3.969	7.2e-05	0.00078	up	2	DUSP2	96143169	96145440	dual specificity pho...	no	no	no	no
ENSG00000158089	40.403	3.289	0.501	6.56	5.4e-11	2.2e-09	up	2	GALNT14	30910467	31155202	polypeptide N-acetyl...	no	no	no	no
ENSG00000158122	904.001	-0.814	0.226	-3.596	0.00032	0.003	down	9	PRXL2C	96639577	96655317	peroxiredoxin like 2...	no	no	no	no
ENSG00000158201	179.677	-0.686	0.15	-4.564	5e-06	7.4e-05	down	18	ABHD3	21650901	21704780	abhydrolase domain c...	no	no	no	no
ENSG00000158270	2973.51	1.298	0.265	4.888	1e-06	1.8e-05	up	18	COLEC12	316737	500722	collectin subfamily ...	no	no	no	no
ENSG00000158296	107.443	-0.966	0.27	-3.575	0.00035	0.003	down	20	SLC13A3	46557823	46684467	solute carrier famil...	no	no	no	no
ENSG00000158555	858.151	-0.629	0.182	-3.468	0.00053	0.004	down	11	GDPD5	75434640	75525941	glycerophosphodieste...	no	no	no	no
ENSG00000158560	81.772	-2.166	0.393	-5.508	3.6e-08	8.5e-07	down	7	DYNC1I1	95772506	96110322	dynein cytoplasmic 1...	no	no	no	no
ENSG00000158716	331.722	-0.453	0.135	-3.352	0.0008	0.006	down	1	DUSP23	159780932	159782543	dual specificity pho...	no	no	no	no
ENSG00000158717	371.036	0.409	0.102	4.017	5.9e-05	0.00065	up	16	RNF166	88696499	88706408	ring finger protein ...	no	no	no	no
ENSG00000158805	650.814	0.401	0.118	3.413	0.00064	0.005	up	16	ZNF276	89720400	89740925	zinc finger protein ...	no	no	no	no
ENSG00000158882	390.986	-0.418	0.114	-3.647	0.00026	0.002	down	1	TOMM40L	161225939	161230746	translocase of outer...	no	no	no	no
ENSG00000159023	430.678	1.505	0.174	8.675	4.1e-18	4.7e-16	up	1	EPB41	28887091	29120046	erythrocyte membrane...	no	no	no	no
ENSG00000159082	910.893	-0.607	0.133	-4.552	5.3e-06	7.8e-05	down	21	SYNJ1	32628759	32728040	synaptojanin 1 [Sour...	no	no	no	no
ENSG00000159164	1358.95	0.563	0.119	4.711	2.5e-06	3.9e-05	up	1	SV2A	149903318	149917844	synaptic vesicle gly...	no	no	no	no
ENSG00000159167	1354.08	1.776	0.351	5.058	4.2e-07	8.1e-06	up	8	STC1	23841929	23854806	stanniocalcin 1 [Sou...	no	no	no	no
ENSG00000159217	1537.06	1.391	0.244	5.689	1.3e-08	3.3e-07	up	17	IGF2BP1	48997385	49056145	insulin like growth ...	no	no	no	no
ENSG00000159228	1639.78	-0.363	0.098	-3.715	0.0002	0.002	down	21	CBR1	36069941	36073166	carbonyl reductase 1...	no	no	no	no
ENSG00000159251	20545.5	-2.551	0.504	-5.064	4.1e-07	7.9e-06	down	15	ACTC1	34790230	34795549	actin alpha cardiac ...	no	no	no	no
ENSG00000159263	312.315	10.923	1.667	6.555	5.6e-11	2.3e-09	up	21	SIM2	36699115	36749917	SIM bHLH transcripti...	no	no	no	no
ENSG00000159348	1391.15	-0.76	0.163	-4.667	3.1e-06	4.7e-05	down	1	CYB5R1	202961873	202967275	cytochrome b5 reduct...	no	no	no	no
ENSG00000159363	1446.8	-0.625	0.171	-3.653	0.00026	0.002	down	1	ATP13A2	16985958	17011928	ATPase cation transp...	no	no	no	no
ENSG00000159674	2476.05	1.422	0.28	5.084	3.7e-07	7.2e-06	up	4	SPON2	1166932	1208962	spondin 2 [Source:HG...	no	no	no	no
ENSG00000159884	292.497	-0.986	0.247	-3.989	6.6e-05	0.00072	down	9	CCDC107	35658290	35661511	coiled-coil domain c...	no	no	no	no
ENSG00000160087	1790.66	0.251	0.069	3.623	0.00029	0.003	up	1	UBE2J2	1253909	1273864	ubiquitin conjugatin...	no	no	no	no
ENSG00000160097	62.954	0.862	0.236	3.654	0.00026	0.002	up	1	FNDC5	32862268	32872482	fibronectin type III...	no	no	no	no
ENSG00000160161	28.72	-1.863	0.388	-4.807	1.5e-06	2.6e-05	down	19	CILP2	19538248	19546659	cartilage intermedia...	no	no	no	no
ENSG00000160200	403.522	0.859	0.255	3.364	0.00077	0.006	up	21	CBS	43053191	43076943	cystathionine beta-s...	no	no	no	no
ENSG00000160201	167.607	-1.1	0.284	-3.871	0.00011	0.001	down	21	U2AF1	43092956	43107570	U2 small nuclear RNA...	no	no	no	no
ENSG00000160219	48.071	-1.102	0.213	-5.186	2.1e-07	4.4e-06	down	X	GAB3	154675249	154751583	GRB2 associated bind...	no	no	no	yes
ENSG00000160221	157.81	1.72	0.247	6.958	3.5e-12	1.7e-10	up	21	GATD3	44133610	44210114	glutamine amidotrans...	no	no	no	no
ENSG00000160255	312.588	-2.909	0.314	-9.261	2e-20	3.1e-18	down	21	ITGB2	44885953	44931989	integrin subunit bet...	no	no	no	no
ENSG00000160469	375.203	1.382	0.162	8.526	1.5e-17	1.6e-15	up	19	BRSK1	55282072	55312562	BR serine/threonine ...	no	no	no	no
ENSG00000160613	2477.76	-0.672	0.195	-3.448	0.00056	0.005	down	11	PCSK7	117204337	117232525	proprotein convertas...	no	no	no	no
ENSG00000160818	1194.81	-0.5	0.138	-3.608	0.00031	0.003	down	1	GPATCH4	156594301	156601496	G-patch domain conta...	no	no	no	no
ENSG00000160886	262.186	2.145	0.283	7.567	3.8e-14	2.5e-12	up	8	LY6K	142700111	142705127	lymphocyte antigen 6...	no	no	no	no
ENSG00000160953	2472.98	0.267	0.075	3.554	0.00038	0.003	up	19	PWWP3A	1354711	1378431	PWWP domain containi...	no	no	no	no
ENSG00000161048	359.934	-0.3	0.088	-3.404	0.00066	0.005	down	7	NAPEPLD	103099776	103149560	N-acyl phosphatidyle...	no	no	no	no
ENSG00000161217	4545.24	-0.275	0.069	-3.982	6.8e-05	0.00074	down	3	PCYT1A	196214222	196287957	phosphate cytidylylt...	no	no	no	no
ENSG00000161249	186.945	2.531	0.303	8.351	6.8e-17	6.5e-15	up	19	DMKN	35497220	35513658	dermokine [Source:HG...	no	no	no	no
ENSG00000161281	408.883	-1.312	0.275	-4.776	1.8e-06	2.9e-05	down	19	COX7A1	36150922	36152449	cytochrome c oxidase...	no	no	no	no
ENSG00000161618	490.637	-0.418	0.129	-3.246	0.001	0.008	down	19	ALDH16A1	49453225	49471050	aldehyde dehydrogena...	no	no	no	no
ENSG00000161981	522.549	0.487	0.12	4.059	4.9e-05	0.00055	up	16	SNRNP25	53828	57669	small nuclear ribonu...	no	no	no	no
ENSG00000162066	644.155	-1.302	0.256	-5.091	3.6e-07	6.9e-06	down	16	AMDHD2	2520357	2531422	amidohydrolase domai...	no	no	no	no
ENSG00000162105	43.324	-1.24	0.369	-3.36	0.00078	0.006	down	11	SHANK2	70467854	71252577	SH3 and multiple ank...	no	no	no	no
ENSG00000162144	1136.08	-0.606	0.136	-4.456	8.3e-06	0.00012	down	11	CYB561A3	61348754	61362283	cytochrome b561 fami...	no	no	no	no
ENSG00000162377	964.307	-0.411	0.113	-3.637	0.00028	0.002	down	1	COA7	52684449	52698347	cytochrome c oxidase...	no	no	no	no
ENSG00000162383	286.698	-2.649	0.3	-8.817	1.2e-18	1.5e-16	down	1	SLC1A7	53087179	53142638	solute carrier famil...	no	no	no	no
ENSG00000162390	211.891	-1.03	0.221	-4.658	3.2e-06	4.9e-05	down	1	ACOT11	54542257	54639192	acyl-CoA thioesteras...	no	no	no	no
ENSG00000162413	2688.2	-0.641	0.198	-3.236	0.001	0.009	down	1	KLHL21	6590724	6614607	kelch like family me...	no	no	no	no
ENSG00000162433	2560.26	1.07	0.291	3.677	0.00024	0.002	up	1	AK4	65147549	65232145	adenylate kinase 4 [...	no	no	no	no
ENSG00000162542	760.457	-0.455	0.101	-4.502	6.7e-06	9.5e-05	down	1	TMCO4	19682240	19799945	transmembrane and co...	no	no	no	no
ENSG00000162551	190.457	5.499	1.156	4.758	2e-06	3.2e-05	up	1	ALPL	21509397	21578410	alkaline phosphatase...	no	no	no	no
ENSG00000162552	37.556	-1.781	0.288	-6.19	6e-10	2e-08	down	1	WNT4	22117313	22143969	Wnt family member 4 ...	no	no	no	no
ENSG00000162576	30162.9	-0.563	0.157	-3.585	0.00034	0.003	down	1	MXRA8	1352689	1361777	matrix remodeling as...	no	no	no	no
ENSG00000162595	156.413	2.516	0.687	3.664	0.00025	0.002	up	1	DIRAS3	68045886	68051717	DIRAS family GTPase ...	no	no	no	no
ENSG00000162618	840.358	-1.398	0.146	-9.553	1.3e-21	2.3e-19	down	1	ADGRL4	78889764	79282124	adhesion G protein-c...	no	no	no	no
ENSG00000162624	36.956	-5.935	1.349	-4.4	1.1e-05	0.00015	down	1	LHX8	75128434	75161533	LIM homeobox 8 [Sour...	no	no	no	no
ENSG00000162631	1281.89	-0.853	0.225	-3.785	0.00015	0.002	down	1	NTNG1	107140007	107484923	netrin G1 [Source:HG...	no	no	no	no
ENSG00000162643	83.681	-0.671	0.203	-3.308	0.00094	0.007	down	1	DNAI3	84999147	85133138	dynein axonemal inte...	no	no	no	no
ENSG00000162650	282.052	0.418	0.131	3.189	0.001	0.01	up	1	ATXN7L2	109483479	109492804	ataxin 7 like 2 [Sou...	no	no	no	no
ENSG00000162654	43.49	3.149	0.569	5.537	3.1e-08	7.4e-07	up	1	GBP4	89181144	89198942	guanylate binding pr...	no	no	no	no
ENSG00000162687	63.806	2.047	0.325	6.293	3.1e-10	1.1e-08	up	1	KCNT2	196225779	196609225	potassium sodium-act...	no	no	no	no
ENSG00000162692	85.42	4.47	0.941	4.751	2e-06	3.3e-05	up	1	VCAM1	100719742	100739045	vascular cell adhesi...	no	no	no	no
ENSG00000162722	28.991	5.772	1.233	4.683	2.8e-06	4.4e-05	up	1	TRIM58	247857187	247880138	tripartite motif con...	no	no	no	no
ENSG00000162733	16805.6	0.289	0.079	3.644	0.00027	0.002	up	1	DDR2	162631373	162787405	discoidin domain rec...	no	no	no	no
ENSG00000162734	23238.4	-0.372	0.082	-4.551	5.3e-06	7.8e-05	down	1	PEA15	160205380	160215376	proliferation and ap...	no	no	no	no
ENSG00000162738	134.024	4.644	0.94	4.942	7.7e-07	1.4e-05	up	1	VANGL2	160400564	160428670	VANGL planar cell po...	no	no	no	no
ENSG00000162772	312.804	2.466	0.347	7.11	1.2e-12	6.2e-11	up	1	ATF3	212565334	212620777	activating transcrip...	no	no	no	no
ENSG00000162849	1289.69	1.503	0.312	4.815	1.5e-06	2.5e-05	up	1	KIF26B	245154985	245709432	kinesin family membe...	no	no	no	no
ENSG00000162882	121.961	0.569	0.175	3.261	0.001	0.008	up	2	HAAO	42767089	42792593	3-hydroxyanthranilat...	no	no	no	no
ENSG00000162894	74.825	1.218	0.349	3.489	0.00049	0.004	up	1	FCMR	206903317	206923247	Fc mu receptor [Sour...	no	no	no	no
ENSG00000162909	26921.5	-0.473	0.077	-6.111	9.9e-10	3.2e-08	down	1	CAPN2	223701593	223776018	calpain 2 [Source:HG...	no	no	no	no
ENSG00000162976	1029.62	-0.585	0.139	-4.214	2.5e-05	0.0003	down	2	SLC66A3	11155198	11178870	solute carrier famil...	no	no	no	no
ENSG00000163013	120.255	1.519	0.256	5.928	3.1e-09	9.1e-08	up	2	FBXO41	73254682	73284478	F-box protein 41 [So...	no	no	no	no
ENSG00000163017	3817.97	9.406	1.691	5.563	2.7e-08	6.4e-07	up	2	ACTG2	73892314	73919865	actin gamma 2, smoot...	no	no	no	no
ENSG00000163032	68.549	2.819	0.718	3.928	8.6e-05	0.0009	up	2	VSNL1	17539126	17657018	visinin like 1 [Sour...	no	no	no	no
ENSG00000163083	312.564	2.88	0.623	4.627	3.7e-06	5.7e-05	up	2	INHBB	120346136	120351803	inhibin subunit beta...	no	no	no	no
ENSG00000163131	87.926	-0.997	0.302	-3.306	0.00095	0.007	down	1	CTSS	150730079	150765957	cathepsin S [Source:...	no	no	no	no
ENSG00000163171	19267.7	0.652	0.138	4.734	2.2e-06	3.6e-05	up	2	CDC42EP3	37641882	37738468	CDC42 effector prote...	no	no	no	no
ENSG00000163251	68.355	-1.829	0.249	-7.332	2.3e-13	1.3e-11	down	2	FZD5	207762598	207769906	frizzled class recep...	no	no	no	no
ENSG00000163297	4268.31	-0.5	0.108	-4.638	3.5e-06	5.4e-05	down	4	ANTXR2	79901146	80125454	ANTXR cell adhesion ...	no	no	no	no
ENSG00000163359	355426	0.727	0.132	5.525	3.3e-08	7.8e-07	up	2	COL6A3	237324003	237414328	collagen type VI alp...	no	no	no	no
ENSG00000163389	811.432	-0.478	0.095	-5.004	5.6e-07	1e-05	down	3	POGLUT1	119468963	119494708	protein O-glucosyltr...	no	no	no	no
ENSG00000163393	483.748	-0.935	0.223	-4.187	2.8e-05	0.00033	down	1	SLC22A15	115976513	116070054	solute carrier famil...	no	no	no	no
ENSG00000163399	8463.75	-0.22	0.063	-3.507	0.00045	0.004	down	1	ATP1A1	116372668	116410261	ATPase Na+/K+ transp...	no	no	no	no
ENSG00000163527	9143.22	-0.545	0.169	-3.225	0.001	0.009	down	3	STT3B	31532638	31637616	STT3 oligosaccharylt...	no	no	no	no
ENSG00000163584	1897.82	0.607	0.155	3.917	9e-05	0.00094	up	3	RPL22L1	170864875	170870208	ribosomal protein L2...	no	no	no	no
ENSG00000163618	379.992	-2.773	0.318	-8.709	3.1e-18	3.6e-16	down	3	CADPS	62398346	62875416	calcium dependent se...	no	no	no	no
ENSG00000163686	259.74	-0.419	0.096	-4.349	1.4e-05	0.00018	down	3	ABHD6	58237532	58295693	abhydrolase domain c...	no	no	no	no
ENSG00000163687	26.37	-25.43	3.249	-7.826	5e-15	3.6e-13	down	3	DNASE1L3	58192257	58214697	deoxyribonuclease 1 ...	no	no	no	no
ENSG00000163694	80.338	-1.429	0.359	-3.983	6.8e-05	0.00074	down	4	RBM47	40423267	40630875	RNA binding motif pr...	no	no	no	no
ENSG00000163701	344.678	-1.155	0.235	-4.912	9e-07	1.6e-05	down	3	IL17RE	9902612	9916402	interleukin 17 recep...	no	no	no	no
ENSG00000163704	192.389	-0.498	0.148	-3.364	0.00077	0.006	down	3	PRRT3	9939450	9952408	proline rich transme...	no	no	no	no
ENSG00000163710	1062.64	-1.779	0.245	-7.263	3.8e-13	2.2e-11	down	3	PCOLCE2	142815922	142889206	procollagen C-endope...	no	no	no	no
ENSG00000163739	77.105	2.847	0.629	4.527	6e-06	8.6e-05	up	4	CXCL1	73869393	73871308	C-X-C motif chemokin...	no	no	no	no
ENSG00000163754	2096.04	-0.391	0.065	-5.997	2e-09	6.1e-08	down	3	GYG1	148991408	149031775	glycogenin 1 [Source...	no	no	no	no
ENSG00000163815	245.187	-1.556	0.252	-6.162	7.2e-10	2.4e-08	down	3	CLEC3B	45001548	45036071	C-type lectin domain...	no	no	no	no
ENSG00000163827	633.212	-1.566	0.166	-9.431	4.1e-21	7.2e-19	down	3	LRRC2	46515385	46606948	leucine rich repeat ...	no	no	no	no
ENSG00000163874	414.878	0.68	0.168	4.049	5.1e-05	0.00057	up	1	ZC3H12A	37474580	37484377	zinc finger CCCH-typ...	no	no	no	no
ENSG00000163879	142.61	3.392	0.409	8.285	1.2e-16	1.1e-14	up	1	DNALI1	37556919	37566857	dynein axonemal ligh...	no	no	no	no
ENSG00000163932	1018.16	-0.52	0.144	-3.605	0.00031	0.003	down	3	PRKCD	53156009	53192717	protein kinase C del...	no	no	no	no
ENSG00000163935	145.858	-0.651	0.14	-4.652	3.3e-06	5e-05	down	3	SFMBT1	52903572	53046750	Scm like with four m...	no	no	no	no
ENSG00000164023	1586.81	-0.734	0.224	-3.279	0.001	0.008	down	4	SGMS2	107824563	107915047	sphingomyelin syntha...	no	no	no	no
ENSG00000164048	359.668	-0.707	0.114	-6.224	4.8e-10	1.7e-08	down	3	ZNF589	48241100	48299253	zinc finger protein ...	no	no	no	no
ENSG00000164050	1195.99	-0.847	0.235	-3.603	0.00031	0.003	down	3	PLXNB1	48403854	48430086	plexin B1 [Source:HG...	no	no	no	no
ENSG00000164078	36.957	-2.658	0.354	-7.507	6e-14	3.9e-12	down	3	MST1R	49887002	49903873	macrophage stimulati...	no	no	no	no
ENSG00000164114	843.35	0.73	0.205	3.553	0.00038	0.003	up	4	MAP9	155342658	155376970	microtubule associat...	no	no	no	no
ENSG00000164125	1289.73	-1.403	0.317	-4.428	9.5e-06	0.00013	down	4	GASK1B	158124474	158173318	golgi associated kin...	no	no	no	no
ENSG00000164136	130.892	0.809	0.191	4.244	2.2e-05	0.00027	up	4	IL15	141636583	141733987	interleukin 15 [Sour...	no	no	no	no
ENSG00000164144	1762.5	-0.333	0.066	-5.029	4.9e-07	9.3e-06	down	4	ARFIP1	152779937	152918463	ADP ribosylation fac...	no	no	no	no
ENSG00000164187	1049.14	-0.401	0.081	-4.951	7.4e-07	1.3e-05	down	5	LMBRD2	36098407	36151887	LMBR1 domain contain...	no	no	no	no
ENSG00000164197	77.247	-1.4	0.327	-4.288	1.8e-05	0.00022	down	5	RNF180	64165843	64372869	ring finger protein ...	no	no	no	no
ENSG00000164237	996.601	-0.525	0.128	-4.116	3.9e-05	0.00044	down	5	CMBL	10275875	10307902	carboxymethylenebute...	no	no	no	no
ENSG00000164241	117.916	-0.75	0.158	-4.746	2.1e-06	3.4e-05	down	5	C5orf63	127045235	127073506	chromosome 5 open re...	no	no	no	no
ENSG00000164251	291.395	3.841	0.284	13.547	8.2e-42	7.2e-39	up	5	F2RL1	76818933	76835315	F2R like trypsin rec...	no	no	no	no
ENSG00000164291	551.595	-0.535	0.121	-4.407	1e-05	0.00014	down	5	ARSK	95555101	95605102	arylsulfatase family...	no	no	no	no
ENSG00000164342	166.19	-1.066	0.291	-3.663	0.00025	0.002	down	4	TLR3	186068911	186088073	toll like receptor 3...	no	no	no	no
ENSG00000164440	27.486	3.261	0.718	4.541	5.6e-06	8.1e-05	up	6	TXLNB	139240061	139291998	taxilin beta [Source...	no	no	no	no
ENSG00000164484	2358.02	-1.982	0.167	-11.849	2.2e-32	1e-29	down	6	TMEM200A	130366017	130443067	transmembrane protei...	no	no	no	no
ENSG00000164506	3494.2	-0.605	0.114	-5.311	1.1e-07	2.3e-06	down	6	STXBP5	147204180	147391010	syntaxin binding pro...	no	no	no	no
ENSG00000164509	50.834	2.656	0.589	4.511	6.5e-06	9.3e-05	up	5	IL31RA	55851357	55922854	interleukin 31 recep...	no	no	no	no
ENSG00000164530	310.982	-1.895	0.525	-3.608	0.00031	0.003	down	6	PI16	36948263	36964837	peptidase inhibitor ...	no	no	no	no
ENSG00000164619	2361.94	0.624	0.124	5.012	5.4e-07	1e-05	up	7	BMPER	33904308	34156427	BMP binding endothel...	no	no	no	no
ENSG00000164683	115.482	1.313	0.305	4.31	1.6e-05	0.00021	up	8	HEY1	79762371	79767857	hes related family b...	no	no	no	no
ENSG00000164713	5960.81	-0.632	0.19	-3.322	0.00089	0.007	down	7	BRI3	98252379	98310441	brain protein I3 [So...	no	no	no	no
ENSG00000164742	56.175	1.48	0.377	3.921	8.8e-05	0.00092	up	7	ADCY1	45574140	45723116	adenylate cyclase 1 ...	no	no	no	no
ENSG00000164916	2430.75	0.437	0.115	3.783	0.00015	0.002	up	7	FOXK1	4682295	4771442	forkhead box K1 [Sou...	no	no	no	no
ENSG00000164920	582.673	1.843	0.319	5.775	7.7e-09	2.1e-07	up	8	OSR2	98944403	98952104	odd-skipped related ...	no	no	no	no
ENSG00000164929	1490.41	0.906	0.187	4.842	1.3e-06	2.2e-05	up	8	BAALC	103140713	103230305	BAALC binder of MAP3...	no	no	no	no
ENSG00000164930	3468.29	-0.504	0.156	-3.239	0.001	0.009	down	8	FZD6	103298433	103332866	frizzled class recep...	no	no	no	no
ENSG00000164976	135.055	-0.578	0.143	-4.03	5.6e-05	0.00062	down	9	MYORG	34366666	34376898	myogenesis regulatin...	no	no	no	no
ENSG00000164978	642.126	0.482	0.088	5.468	4.5e-08	1e-06	up	9	NUDT2	34329506	34343711	nudix hydrolase 2 [S...	no	no	no	no
ENSG00000165072	104.488	-1.961	0.308	-6.374	1.8e-10	6.9e-09	down	9	MAMDC2	70043848	70226972	MAM domain containin...	no	no	no	no
ENSG00000165092	65.59	-4.05	0.53	-7.639	2.2e-14	1.5e-12	down	9	ALDH1A1	72900671	73080442	aldehyde dehydrogena...	no	no	no	no
ENSG00000165156	2061.19	-0.567	0.094	-6.026	1.7e-09	5.2e-08	down	8	ZHX1	123248451	123275541	zinc fingers and hom...	no	no	no	no
ENSG00000165244	433.28	-1.212	0.224	-5.403	6.6e-08	1.5e-06	down	9	ZNF367	96385941	96418370	zinc finger protein ...	no	no	no	no
ENSG00000165246	1645.07	1.178	0.154	7.63	2.3e-14	1.6e-12	up	Y	NLGN4Y	14522573	14845654	neuroligin 4 Y-linke...	no	no	no	no
ENSG00000165288	855.958	0.471	0.089	5.275	1.3e-07	2.8e-06	up	X	BRWD3	80669503	80809877	bromodomain and WD r...	no	no	no	yes
ENSG00000165323	209.381	-1.461	0.255	-5.736	9.7e-09	2.6e-07	down	11	FAT3	92224818	92896473	FAT atypical cadheri...	no	no	no	no
ENSG00000165338	1188.42	0.4	0.118	3.386	0.00071	0.006	up	10	HECTD2	91409280	91514829	HECT domain E3 ubiqu...	no	no	no	no
ENSG00000165449	21.553	-2.623	0.508	-5.165	2.4e-07	4.8e-06	down	10	SLC16A9	59650764	59736002	solute carrier famil...	no	no	no	no
ENSG00000165475	271.858	-0.59	0.139	-4.231	2.3e-05	0.00028	down	13	CRYL1	20403666	20525873	crystallin lambda 1 ...	no	no	no	no
ENSG00000165521	63.343	4.491	1.039	4.321	1.6e-05	0.0002	up	14	EML5	88612431	88792953	EMAP like 5 [Source:...	no	no	no	no
ENSG00000165572	566.873	-0.561	0.164	-3.412	0.00064	0.005	down	13	KBTBD6	41127569	41132802	kelch repeat and BTB...	no	no	no	no
ENSG00000165617	2163	1.164	0.182	6.388	1.7e-10	6.4e-09	up	14	DACT1	58633967	58648321	dishevelled binding ...	no	no	no	no
ENSG00000165655	2257.29	-0.694	0.217	-3.204	0.001	0.009	down	10	ZNF503	75397830	75401764	zinc finger protein ...	no	no	no	no
ENSG00000165792	1194.46	0.232	0.056	4.173	3e-05	0.00035	up	14	METTL17	20989973	20997035	methyltransferase li...	no	no	no	no
ENSG00000165795	59.264	2.207	0.383	5.769	8e-09	2.2e-07	up	14	NDRG2	21016763	21070872	NDRG family member 2...	no	no	no	no
ENSG00000165821	190.609	2.255	0.223	10.106	5.2e-24	1.2e-21	up	14	SALL2	21521080	21537216	spalt like transcrip...	no	no	no	no
ENSG00000165912	692.72	1.456	0.123	11.846	2.2e-32	1e-29	up	11	PACSIN3	47177522	47186443	protein kinase C and...	no	no	no	no
ENSG00000165949	164.091	2.468	0.421	5.861	4.6e-09	1.3e-07	up	14	IFI27	94104836	94116695	interferon alpha ind...	no	no	no	no
ENSG00000166166	703.291	-0.459	0.131	-3.512	0.00045	0.004	down	14	TRMT61A	103529196	103537073	tRNA methyltransfera...	no	no	no	no
ENSG00000166206	82.319	9	0.814	11.052	2.1e-28	6.9e-26	up	15	GABRB3	26543552	26939539	gamma-aminobutyric a...	no	no	no	no
ENSG00000166311	7114.89	-0.598	0.134	-4.448	8.7e-06	0.00012	down	11	SMPD1	6390440	6394998	sphingomyelin phosph...	no	no	no	no
ENSG00000166321	113.394	0.658	0.202	3.255	0.001	0.008	up	10	NUDT13	73110375	73131828	nudix hydrolase 13 [...	no	no	no	no
ENSG00000166340	5835.14	-0.699	0.214	-3.275	0.001	0.008	down	11	TPP1	6612768	6619448	tripeptidyl peptidas...	no	no	no	no
ENSG00000166341	2589.87	1.531	0.194	7.891	3e-15	2.2e-13	up	11	DCHS1	6621330	6655809	dachsous cadherin-re...	no	no	no	no
ENSG00000166347	910.586	-0.885	0.205	-4.317	1.6e-05	0.0002	down	18	CYB5A	74250846	74291973	cytochrome b5 type A...	no	no	no	no
ENSG00000166401	1304.26	-0.386	0.114	-3.379	0.00073	0.006	down	18	SERPINB8	63970029	64019779	serpin family B memb...	no	no	no	no
ENSG00000166432	68.618	-1.148	0.267	-4.294	1.8e-05	0.00022	down	X	ZMAT1	101882288	101932031	zinc finger matrin-t...	no	no	yes	no
ENSG00000166436	727.908	0.685	0.136	5.049	4.4e-07	8.4e-06	up	11	TRIM66	8612037	8682694	tripartite motif con...	no	no	no	no
ENSG00000166446	715.924	-0.644	0.12	-5.37	7.9e-08	1.7e-06	down	16	CDYL2	80597907	80804598	chromodomain Y like ...	no	no	no	no
ENSG00000166448	178.513	-2.094	0.283	-7.399	1.4e-13	8.4e-12	down	7	TMEM130	98846488	98870771	transmembrane protei...	no	no	no	no
ENSG00000166479	5658.63	-0.512	0.081	-6.286	3.2e-10	1.2e-08	down	18	TMX3	68673688	68715108	thioredoxin related ...	no	no	no	no
ENSG00000166548	1305.13	-0.554	0.11	-5.042	4.6e-07	8.7e-06	down	16	TK2	66508003	66552544	thymidine kinase 2 [...	no	no	no	no
ENSG00000166670	51.758	3.511	0.705	4.981	6.3e-07	1.2e-05	up	11	MMP10	102770502	102780628	matrix metallopeptid...	no	no	no	no
ENSG00000166750	7706.83	0.342	0.093	3.694	0.00022	0.002	up	17	SLFN5	35243071	35273655	schlafen family memb...	no	no	no	no
ENSG00000166897	129.753	3.63	0.553	6.569	5.1e-11	2.1e-09	up	22	ELFN2	37367960	37427479	extracellular leucin...	no	no	no	no
ENSG00000166922	534.261	-1.481	0.304	-4.879	1.1e-06	1.9e-05	down	15	SCG5	32641676	32697098	secretogranin V [Sou...	no	no	no	no
ENSG00000167034	242.209	-0.768	0.187	-4.119	3.8e-05	0.00044	down	8	NKX3-1	23678697	23682938	NK3 homeobox 1 [Sour...	no	no	no	no
ENSG00000167100	332.547	2.217	0.236	9.412	4.9e-21	8.3e-19	up	17	SAMD14	50110040	50130160	sterile alpha motif ...	no	no	no	no
ENSG00000167107	679.776	-0.481	0.143	-3.372	0.00075	0.006	down	17	ACSF2	50426158	50474845	acyl-CoA synthetase ...	no	no	no	no
ENSG00000167114	1463.06	-0.506	0.152	-3.324	0.00089	0.007	down	9	SLC27A4	128340527	128361470	solute carrier famil...	no	no	no	no
ENSG00000167371	413.735	1.107	0.144	7.709	1.3e-14	8.8e-13	up	16	PRRT2	29811382	29815892	proline rich transme...	no	no	no	no
ENSG00000167393	668.051	0.709	0.126	5.65	1.6e-08	4.1e-07	up	X	PPP2R3B	333933	386955	protein phosphatase ...	PAR1	no	no	no
ENSG00000167470	3701.49	1.17	0.091	12.796	1.7e-37	9.9e-35	up	19	MIDN	1248553	1259143	midnolin [Source:HGN...	no	no	no	no
ENSG00000167487	198.198	-0.883	0.232	-3.807	0.00014	0.001	down	19	KLHL26	18637025	18671721	kelch like family me...	no	no	no	no
ENSG00000167703	145.061	-0.853	0.223	-3.832	0.00013	0.001	down	17	SLC43A2	1569268	1628886	solute carrier famil...	no	no	no	no
ENSG00000167767	151.334	1.414	0.252	5.616	2e-08	4.8e-07	up	12	KRT80	52168996	52192014	keratin 80 [Source:H...	no	no	no	no
ENSG00000167771	201.545	0.917	0.247	3.714	0.0002	0.002	up	11	RCOR2	63911230	63917164	REST corepressor 2 [...	no	no	no	no
ENSG00000167772	383.89	-1.291	0.328	-3.931	8.5e-05	0.00089	down	19	ANGPTL4	8363289	8374370	angiopoietin like 4 ...	no	no	no	no
ENSG00000167889	61.796	1.896	0.37	5.123	3e-07	5.9e-06	up	17	MGAT5B	76868404	76950393	alpha-1,6-mannosylgl...	no	no	no	no
ENSG00000167925	588.401	-0.612	0.172	-3.559	0.00037	0.003	down	17	GHDC	42188799	42194532	GH3 domain containin...	no	no	no	no
ENSG00000167972	53.876	1.143	0.297	3.846	0.00012	0.001	up	16	ABCA3	2275881	2340746	ATP binding cassette...	no	no	no	no
ENSG00000167996	32529.9	-1.109	0.265	-4.188	2.8e-05	0.00033	down	11	FTH1	61959718	61967634	ferritin heavy chain...	no	no	no	no
ENSG00000168038	168.809	-0.656	0.155	-4.238	2.3e-05	0.00027	down	3	ULK4	41246599	41962130	unc-51 like kinase 4...	no	no	no	no
ENSG00000168140	4912.15	-0.933	0.175	-5.331	9.8e-08	2.1e-06	down	16	VASN	4371848	4383538	vasorin [Source:HGNC...	no	no	no	no
ENSG00000168152	126.22	0.567	0.106	5.345	9.1e-08	2e-06	up	4	THAP9	82900684	82919969	THAP domain containi...	no	no	no	no
ENSG00000168159	3980.11	0.39	0.116	3.352	0.0008	0.006	up	1	RNF187	228487382	228499899	ring finger protein ...	no	no	no	no
ENSG00000168234	696.198	-0.666	0.176	-3.776	0.00016	0.002	down	18	TTC39C	23992773	24135610	tetratricopeptide re...	no	no	no	no
ENSG00000168255	123.135	0.862	0.143	6.027	1.7e-09	5.2e-08	up	7	POLR2J3	102537918	102572653	RNA polymerase II su...	no	no	no	no
ENSG00000168386	3701.85	0.559	0.128	4.363	1.3e-05	0.00017	up	3	FILIP1L	99828811	100114513	filamin A interactin...	no	no	no	no
ENSG00000168398	582.705	1.157	0.233	4.962	7e-07	1.3e-05	up	14	BDKRB2	96204679	96244166	bradykinin receptor ...	no	no	no	no
ENSG00000168461	7091.19	-0.422	0.127	-3.328	0.00088	0.007	down	18	RAB31	9708275	9862551	RAB31, member RAS on...	no	no	no	no
ENSG00000168477	2425.74	-0.904	0.258	-3.51	0.00045	0.004	down	6	TNXB	32041153	32115334	tenascin XB [Source:...	no	no	no	no
ENSG00000168497	324.419	-1.717	0.324	-5.298	1.2e-07	2.5e-06	down	2	CAVIN2	191834310	191847088	caveolae associated ...	no	no	no	no
ENSG00000168505	155.962	7.998	2.172	3.683	0.00023	0.002	up	2	GBX2	236165236	236168386	gastrulation brain h...	no	no	no	no
ENSG00000168528	1023.93	-2.103	0.369	-5.704	1.2e-08	3.1e-07	down	1	SERINC2	31409565	31434680	serine incorporator ...	no	no	no	no
ENSG00000168542	342795	0.739	0.21	3.525	0.00042	0.004	up	2	COL3A1	188974373	189012746	collagen type III al...	no	no	no	no
ENSG00000168575	2911.83	-0.915	0.203	-4.509	6.5e-06	9.3e-05	down	8	SLC20A2	42416475	42541926	solute carrier famil...	no	no	no	no
ENSG00000168661	129.307	-0.63	0.178	-3.534	0.00041	0.004	down	19	ZNF30	34926903	34945170	zinc finger protein ...	no	no	no	no
ENSG00000168679	307.095	1.185	0.128	9.277	1.7e-20	2.7e-18	up	1	SLC16A4	110362851	110391082	solute carrier famil...	no	no	no	no
ENSG00000168685	2769.98	-2.017	0.295	-6.843	7.7e-12	3.7e-10	down	5	IL7R	35852695	35879603	interleukin 7 recept...	no	no	no	no
ENSG00000168734	1830.57	1.166	0.166	7.015	2.3e-12	1.2e-10	up	20	PKIG	44531785	44624247	cAMP-dependent prote...	no	no	no	no
ENSG00000168758	1179.56	0.674	0.163	4.129	3.7e-05	0.00042	up	2	SEMA4C	96859718	96870757	semaphorin 4C [Sourc...	no	no	no	no
ENSG00000168792	405.515	-0.528	0.135	-3.913	9.1e-05	0.00095	down	17	ABHD15	29560547	29567037	abhydrolase domain c...	no	no	no	no
ENSG00000168906	10097.7	-0.163	0.051	-3.19	0.001	0.01	down	2	MAT2A	85539168	85545281	methionine adenosylt...	no	no	no	no
ENSG00000168916	406.51	2.398	0.272	8.815	1.2e-18	1.5e-16	up	5	ZNF608	124636913	124748807	zinc finger protein ...	no	no	no	no
ENSG00000168938	2464.42	-0.469	0.132	-3.557	0.00037	0.003	down	5	PPIC	123023250	123036725	peptidylprolyl isome...	no	no	no	no
ENSG00000169019	686.65	-0.37	0.111	-3.332	0.00086	0.006	down	4	COMMD8	47450787	47463702	COMM domain containi...	no	no	no	no
ENSG00000169084	896.582	0.621	0.179	3.46	0.00054	0.004	up	X	DHRSX	2219506	2502805	dehydrogenase/reduct...	PAR1	no	no	no
ENSG00000169093	1413.91	0.763	0.134	5.709	1.1e-08	3e-07	up	X	ASMTL	1403139	1453762	acetylserotonin O-me...	PAR1	no	no	no
ENSG00000169129	65.661	4.667	1.103	4.232	2.3e-05	0.00028	up	10	AFAP1L2	114294824	114404756	actin filament assoc...	no	no	no	no
ENSG00000169203	37.659	-1.272	0.342	-3.719	0.0002	0.002	down	16	NPIPB12	29483534	29506408	nuclear pore complex...	no	no	no	no
ENSG00000169220	123.722	-0.873	0.254	-3.43	0.0006	0.005	down	5	RGS14	177357924	177372596	regulator of G prote...	no	no	no	no
ENSG00000169247	101.092	-0.752	0.208	-3.612	0.0003	0.003	down	5	SH3TC2	148923639	149063163	SH3 domain and tetra...	no	no	no	no
ENSG00000169255	791.66	-0.582	0.114	-5.124	3e-07	5.9e-06	down	3	B3GALNT1	161083883	161105411	beta-1,3-N-acetylgal...	no	no	no	no
ENSG00000169258	256.459	-0.721	0.203	-3.56	0.00037	0.003	down	5	GPRIN1	176595802	176610156	G protein regulated ...	no	no	no	no
ENSG00000169379	718.087	-0.677	0.124	-5.452	5e-08	1.1e-06	down	3	ARL13B	93980139	94055678	ADP ribosylation fac...	no	no	no	no
ENSG00000169429	84.295	3.939	0.878	4.485	7.3e-06	0.0001	up	4	CXCL8	73740519	73743716	C-X-C motif chemokin...	no	no	no	no
ENSG00000169432	468.031	2.016	0.292	6.902	5.1e-12	2.5e-10	up	2	SCN9A	166195185	166376001	sodium voltage-gated...	no	no	no	no
ENSG00000169499	1822.85	0.663	0.121	5.494	3.9e-08	9.2e-07	up	8	PLEKHA2	38901235	38973912	pleckstrin homology ...	no	no	no	no
ENSG00000169507	18.365	-3.959	0.826	-4.793	1.6e-06	2.7e-05	down	2	SLC38A11	164894354	164955525	solute carrier famil...	no	no	no	no
ENSG00000169515	1594.87	1.102	0.142	7.759	8.6e-15	6e-13	up	19	CCDC8	46410329	46413564	coiled-coil domain c...	no	no	no	no
ENSG00000169583	346.011	-1.169	0.278	-4.202	2.6e-05	0.00031	down	9	CLIC3	136994608	136996568	chloride intracellul...	no	no	no	no
ENSG00000169760	714.644	-0.926	0.179	-5.187	2.1e-07	4.3e-06	down	3	NLGN1	173396284	174294372	neuroligin 1 [Source...	no	no	no	no
ENSG00000169764	8157.89	-0.737	0.184	-4.009	6.1e-05	0.00067	down	2	UGP2	63840952	63891562	UDP-glucose pyrophos...	no	no	no	no
ENSG00000169851	382.333	-4.786	0.363	-13.17	1.3e-39	8.6e-37	down	4	PCDH7	30720369	31146805	protocadherin 7 [Sou...	no	no	no	no
ENSG00000169862	32.481	5.354	1.15	4.657	3.2e-06	4.9e-05	up	5	CTNND2	10971836	11904446	catenin delta 2 [Sou...	no	no	no	no
ENSG00000170049	100.968	0.819	0.187	4.375	1.2e-05	0.00016	up	17	KCNAB3	7921859	7929856	potassium voltage-ga...	no	no	no	no
ENSG00000170088	862.651	-0.614	0.189	-3.25	0.001	0.008	down	4	TMEM192	165070608	165208549	transmembrane protei...	no	no	no	no
ENSG00000170160	395.481	-1.658	0.424	-3.908	9.3e-05	0.00097	down	17	CCDC144A	16689537	16777881	coiled-coil domain c...	no	no	no	no
ENSG00000170175	121.466	0.573	0.163	3.516	0.00044	0.004	up	17	CHRNB1	7445061	7457710	cholinergic receptor...	no	no	no	no
ENSG00000170214	168.834	-1.241	0.251	-4.944	7.7e-07	1.4e-05	down	5	ADRA1B	159865080	159973012	adrenoceptor alpha 1...	no	no	no	no
ENSG00000170275	12763.5	-0.326	0.08	-4.061	4.9e-05	0.00055	down	3	CRTAP	33114014	33147773	cartilage associated...	no	no	no	no
ENSG00000170348	13688	-0.4	0.071	-5.611	2e-08	5e-07	down	14	TMED10	75131469	75176612	transmembrane p24 tr...	no	no	no	no
ENSG00000170379	145.221	1.185	0.206	5.743	9.3e-09	2.5e-07	up	7	TCAF2	143620952	143730410	TRPM8 channel associ...	no	no	no	no
ENSG00000170385	2362.11	-0.629	0.103	-6.133	8.7e-10	2.9e-08	down	1	SLC30A1	211571568	211579161	solute carrier famil...	no	no	no	no
ENSG00000170396	36.512	3.383	0.58	5.828	5.6e-09	1.6e-07	up	2	ZNF804A	184598529	184939492	zinc finger protein ...	no	no	no	no
ENSG00000170412	48.743	5.928	1.605	3.694	0.00022	0.002	up	17	GPRC5C	74424851	74451653	G protein-coupled re...	no	no	no	no
ENSG00000170421	134.819	1.201	0.267	4.491	7.1e-06	0.0001	up	12	KRT8	52897187	52949954	keratin 8 [Source:HG...	no	no	no	no
ENSG00000170456	997.542	-0.64	0.177	-3.618	0.0003	0.003	down	12	DENND5B	31382226	31591136	DENN domain containi...	no	no	no	no
ENSG00000170477	5.028	4.474	1.168	3.829	0.00013	0.001	up	12	KRT4	52806549	52814116	keratin 4 [Source:HG...	no	no	no	no
ENSG00000170485	615.367	-1.123	0.183	-6.147	7.9e-10	2.6e-08	down	2	NPAS2	100820139	100996829	neuronal PAS domain ...	no	no	no	no
ENSG00000170502	891.729	-0.293	0.082	-3.551	0.00038	0.003	down	4	NUDT9	87422573	87459455	nudix hydrolase 9 [S...	no	no	no	no
ENSG00000170549	213.209	4.528	0.509	8.902	5.5e-19	7.1e-17	up	5	IRX1	3595832	3601403	iroquois homeobox 1 ...	no	no	no	no
ENSG00000170561	1014.74	1.318	0.159	8.297	1.1e-16	9.9e-15	up	5	IRX2	2745845	2751677	iroquois homeobox 2 ...	no	no	no	no
ENSG00000170624	10245.3	-0.708	0.183	-3.87	0.00011	0.001	down	5	SGCD	155870344	156767788	sarcoglycan delta [S...	no	no	no	no
ENSG00000170689	245.737	6.917	0.852	8.119	4.7e-16	3.9e-14	up	17	HOXB9	48621156	48626358	homeobox B9 [Source:...	no	no	no	no
ENSG00000170734	2675.66	-0.729	0.099	-7.369	1.7e-13	1e-11	down	6	POLH	43576185	43620523	DNA polymerase eta [...	no	no	no	no
ENSG00000170775	66.823	9.111	1.209	7.539	4.7e-14	3.1e-12	up	7	GPR37	124743885	124765792	G protein-coupled re...	no	no	no	no
ENSG00000170776	3148.7	0.46	0.119	3.871	0.00011	0.001	up	15	AKAP13	85380571	85749358	A-kinase anchoring p...	no	no	no	no
ENSG00000170801	1123.39	1.221	0.177	6.884	5.8e-12	2.8e-10	up	4	HTRA3	8269754	8307098	HtrA serine peptidas...	no	no	no	no
ENSG00000170921	3602.91	0.477	0.141	3.37	0.00075	0.006	up	17	TANC2	62966235	63427703	tetratricopeptide re...	no	no	no	no
ENSG00000170961	5232.52	-0.688	0.183	-3.755	0.00017	0.002	down	8	HAS2	121612116	121641440	hyaluronan synthase ...	no	no	no	no
ENSG00000171084	89.74	0.937	0.2	4.695	2.7e-06	4.2e-05	up	3	FAM86JP	125916624	125928595	family with sequence...	no	no	no	no
ENSG00000171208	724.639	1.049	0.241	4.361	1.3e-05	0.00017	up	16	NETO2	47077703	47143945	neuropilin and tollo...	no	no	no	no
ENSG00000171223	2161.51	1.08	0.19	5.676	1.4e-08	3.6e-07	up	19	JUNB	12791486	12793315	JunB proto-oncogene,...	no	no	no	no
ENSG00000171246	112.485	1.52	0.463	3.28	0.001	0.008	up	17	NPTX1	80466834	80477843	neuronal pentraxin 1...	no	no	no	no
ENSG00000171298	2905.69	-0.934	0.229	-4.08	4.5e-05	0.00051	down	17	GAA	80101556	80119881	alpha glucosidase [S...	no	no	no	no
ENSG00000171310	688.266	-1.825	0.175	-10.412	2.2e-25	5.3e-23	down	12	CHST11	104455295	104762014	carbohydrate sulfotr...	no	no	no	no
ENSG00000171320	311.839	-0.906	0.271	-3.338	0.00084	0.006	down	8	ESCO2	27771949	27812640	establishment of sis...	no	no	no	no
ENSG00000171345	876.765	1.648	0.228	7.227	4.9e-13	2.7e-11	up	17	KRT19	41523617	41528308	keratin 19 [Source:H...	no	no	no	no
ENSG00000171365	548.458	-0.581	0.166	-3.508	0.00045	0.004	down	X	CLCN5	49922596	50099235	chloride voltage-gat...	no	no	no	yes
ENSG00000171385	555.125	-2.914	0.313	-9.296	1.5e-20	2.4e-18	down	1	KCND3	111770662	111989668	potassium voltage-ga...	no	no	no	no
ENSG00000171388	195.612	1.414	0.375	3.766	0.00017	0.002	up	X	APLN	129645259	129654956	apelin [Source:HGNC ...	no	no	no	yes
ENSG00000171408	733.974	2.032	0.25	8.116	4.8e-16	3.9e-14	up	6	PDE7B	135851701	136195574	phosphodiesterase 7B...	no	no	no	no
ENSG00000171444	570.596	-0.49	0.12	-4.064	4.8e-05	0.00054	down	5	MCC	113022106	113488823	MCC regulator of WNT...	no	no	no	no
ENSG00000171658	28.811	-1.757	0.315	-5.573	2.5e-08	6.1e-07	down	3	NMRAL2P	185960039	185979837	NmrA like redox sens...	no	no	no	no
ENSG00000171680	738.82	1.147	0.212	5.401	6.6e-08	1.5e-06	up	1	PLEKHG5	6467122	6520074	pleckstrin homology ...	no	no	no	no
ENSG00000171798	46.498	3.411	0.436	7.822	5.2e-15	3.7e-13	up	10	KNDC1	133160219	133226412	kinase non-catalytic...	no	no	no	no
ENSG00000171867	9016.08	-0.512	0.134	-3.819	0.00013	0.001	down	20	PRNP	4686350	4701590	prion protein [Sourc...	no	no	no	no
ENSG00000171951	178.534	-1.394	0.306	-4.554	5.3e-06	7.7e-05	down	2	SCG2	223596940	223602361	secretogranin II [So...	no	no	no	no
ENSG00000171992	1800.55	0.812	0.187	4.349	1.4e-05	0.00018	up	5	SYNPO	150601080	150659207	synaptopodin [Source...	no	no	no	no
ENSG00000172183	163.624	-1.284	0.384	-3.349	0.00081	0.006	down	15	ISG20	88635670	88656483	interferon stimulate...	no	no	no	no
ENSG00000172197	312.277	-0.585	0.167	-3.508	0.00045	0.004	down	6	MBOAT1	20099684	20212469	membrane bound O-acy...	no	no	no	no
ENSG00000172292	959.592	-0.681	0.16	-4.248	2.2e-05	0.00026	down	2	CERS6	168456249	168775134	ceramide synthase 6 ...	no	no	no	no
ENSG00000172346	565.75	2.247	0.216	10.425	1.9e-25	4.8e-23	up	22	CSDC2	41561010	41577741	cold shock domain co...	no	no	no	no
ENSG00000172379	1847.43	0.783	0.207	3.778	0.00016	0.002	up	15	ARNT2	80404350	80597933	aryl hydrocarbon rec...	no	no	no	no
ENSG00000172432	3667.25	0.771	0.233	3.316	0.00091	0.007	up	6	GTPBP2	43605316	43629264	GTP binding protein ...	no	no	no	no
ENSG00000172465	605.168	-0.568	0.175	-3.243	0.001	0.008	down	X	TCEAL1	103628704	103630953	transcription elonga...	no	no	no	yes
ENSG00000172469	975.679	-0.517	0.109	-4.747	2.1e-06	3.3e-05	down	6	MANEA	95577485	95609470	mannosidase endo-alp...	no	no	no	no
ENSG00000172548	82.201	4.485	0.429	10.458	1.3e-25	3.5e-23	up	5	NIPAL4	157460213	157474722	NIPA like domain con...	no	no	no	no
ENSG00000172575	244.369	3.763	0.472	7.968	1.6e-15	1.2e-13	up	15	RASGRP1	38488103	38565575	RAS guanyl releasing...	no	no	no	no
ENSG00000172803	79.999	1.308	0.238	5.485	4.1e-08	9.6e-07	up	11	SNX32	65833834	65856896	sorting nexin 32 [So...	no	no	no	no
ENSG00000172817	179.114	1.721	0.38	4.533	5.8e-06	8.4e-05	up	8	CYP7B1	64587763	64798737	cytochrome P450 fami...	no	no	no	no
ENSG00000172954	1041.59	-0.476	0.111	-4.293	1.8e-05	0.00022	down	2	LCLAT1	30447226	30644225	lysocardiolipin acyl...	no	no	no	no
ENSG00000172986	547.572	0.693	0.199	3.478	0.00051	0.004	up	3	GXYLT2	72888046	72998138	glucoside xylosyltra...	no	no	no	no
ENSG00000173166	1008.43	-0.52	0.115	-4.532	5.8e-06	8.4e-05	down	2	RAPH1	203394345	203535335	Ras association (Ral...	no	no	no	no
ENSG00000173218	1731.54	-0.502	0.13	-3.864	0.00011	0.001	down	1	VANGL1	115641970	115698224	VANGL planar cell po...	no	no	no	no
ENSG00000173267	56.91	1.077	0.273	3.939	8.2e-05	0.00087	up	10	SNCG	86958599	86963258	synuclein gamma [Sou...	no	no	no	no
ENSG00000173281	705.721	-0.745	0.2	-3.733	0.00019	0.002	down	8	PPP1R3B	9136255	9151574	protein phosphatase ...	no	no	no	no
ENSG00000173295	101.84	-0.817	0.211	-3.881	0.0001	0.001	down	8	FAM86B3P	8228605	8237275	family with sequence...	no	no	no	no
ENSG00000173334	257.54	1.405	0.167	8.431	3.4e-17	3.4e-15	up	8	TRIB1	125430358	125438403	tribbles pseudokinas...	no	no	no	no
ENSG00000173376	1659.13	-1.394	0.387	-3.606	0.00031	0.003	down	4	NDNF	121035613	121073021	neuron derived neuro...	no	no	no	no
ENSG00000173535	71.615	-1.605	0.272	-5.908	3.5e-09	1e-07	down	8	TNFRSF10C	23102921	23117445	TNF receptor superfa...	no	no	no	no
ENSG00000173597	62.103	8.124	1.394	5.828	5.6e-09	1.6e-07	up	4	SULT1B1	69721167	69787961	sulfotransferase fam...	no	no	no	no
ENSG00000173599	621.667	-0.568	0.164	-3.454	0.00055	0.004	down	11	PC	66848417	66958386	pyruvate carboxylase...	no	no	no	no
ENSG00000173641	5234.08	-1.07	0.146	-7.348	2e-13	1.2e-11	down	1	HSPB7	16014028	16019594	heat shock protein f...	no	no	no	no
ENSG00000173706	16545.3	0.53	0.07	7.52	5.5e-14	3.5e-12	up	3	HEG1	124965710	125055997	heart development pr...	no	no	no	no
ENSG00000173801	224.459	2.728	0.274	9.949	2.6e-23	5.3e-21	up	17	JUP	41754604	41786931	junction plakoglobin...	no	no	no	no
ENSG00000173914	780.285	0.254	0.073	3.502	0.00046	0.004	up	11	RBM4B	66664998	66677887	RNA binding motif pr...	no	no	no	no
ENSG00000173926	94.854	-0.847	0.243	-3.49	0.00048	0.004	down	5	MARCHF3	126867714	127030558	membrane associated ...	no	no	no	no
ENSG00000174028	154.986	-0.74	0.222	-3.342	0.00083	0.006	down	X	FAM3C2P	23075758	23076767	family with sequence...	no	no	no	no
ENSG00000174032	903.784	-1.149	0.159	-7.23	4.8e-13	2.7e-11	down	13	SLC25A30	45393316	45418455	solute carrier famil...	no	no	no	no
[truncated: 568 more rows]

## Sheet: iPSCs-FDR0.05 LogFC0.58
Supplemental Data S4: List of DEGs From RNAseq Analysis of 47,XXY vs 46,XY iPSCs FDR<0.05 LogFC>|0.58|
[truncated: 1,793 more rows]

[truncated: 4 more sheets: iPSCs-FDR0.01, NSCs-FDR0.01, NSCs-FDR0.05 LogFC0.58, Legend]
