# Supplementary material for: An iPSC-based model of 47,XYY Jacobs syndrome reveals a DNA methylation-independent transcriptional dysregulation shared with male X aneuploid cells
Source: Genome Res. 2025 Jul;35(7):1503–17. doi: 10.1101/gr.279716.124 (PMC12212075; doi:10.1101/gr.279716.124)
Supplement: Supplement 6 [file Supplemental_Data_S5_R3.xlsx]

## Sheet: iPSCs
Supplemental Data S5: Bootstrap analysis in iPSCs. We looped over the patients and randomly sampled a clone for each patient.
Ensembl_id	DEG_count	DEG_percent	chromosome_name	hgnc_symbol	start_position	end_position	description	isPAR	escape_Tukianien	variable_Tukianien	inactive_Tukianien
ENSG00000003436	50	100	2	TFPI	187464230	187565760	tissue factor pathway inhibitor [Source:HGNC Symbol;Acc:HGNC:11760]	no	no	no	no
ENSG00000005001	50	100	16	PRSS22	2852730	2858170	serine protease 22 [Source:HGNC Symbol;Acc:HGNC:14368]	no	no	no	no
ENSG00000005844	50	100	16	ITGAL	30472658	30523567	integrin subunit alpha L [Source:HGNC Symbol;Acc:HGNC:6148]	no	no	no	no
ENSG00000006611	50	100	11	USH1C	17493895	17544416	USH1 protein network component harmonin [Source:HGNC Symbol;Acc:HGNC:12597]	no	no	no	no
ENSG00000008710	50	100	16	PKD1	2088708	2135898	polycystin 1, transient receptor potential channel interacting [Source:HGNC Symbol;Acc:HGNC:9008]	no	no	no	no
ENSG00000009694	50	100	X	TENM1	124375903	125204312	teneurin transmembrane protein 1 [Source:HGNC Symbol;Acc:HGNC:8117]	no	no	no	yes
ENSG00000009724	50	100	1	MASP2	11022009	11047239	MBL associated serine protease 2 [Source:HGNC Symbol;Acc:HGNC:6902]	no	no	no	no
ENSG00000012817	50	100	Y	KDM5D	19703865	19744939	lysine demethylase 5D [Source:HGNC Symbol;Acc:HGNC:11115]	no	no	no	no
ENSG00000013503	50	100	12	POLR3B	106357748	106510198	RNA polymerase III subunit B [Source:HGNC Symbol;Acc:HGNC:30348]	no	no	no	no
ENSG00000037897	50	100	12	METTL1	57768471	57772119	methyltransferase 1, tRNA methylguanosine [Source:HGNC Symbol;Acc:HGNC:7030]	no	no	no	no
ENSG00000040633	50	100	17	PHF23	7235029	7239722	PHD finger protein 23 [Source:HGNC Symbol;Acc:HGNC:28428]	no	no	no	no
ENSG00000042980	50	100	8	ADAM28	24294069	24359014	ADAM metallopeptidase domain 28 [Source:HGNC Symbol;Acc:HGNC:206]	no	no	no	no
ENSG00000050030	50	100	X	NEXMIF	74732856	74925472	neurite extension and migration factor [Source:HGNC Symbol;Acc:HGNC:29433]	no	no	no	yes
ENSG00000054179	50	100	9	ENTPD2	137048107	137054061	ectonucleoside triphosphate diphosphohydrolase 2 [Source:HGNC Symbol;Acc:HGNC:3364]	no	no	no	no
ENSG00000054654	50	100	14	SYNE2	63761899	64226433	spectrin repeat containing nuclear envelope protein 2 [Source:HGNC Symbol;Acc:HGNC:17084]	no	no	no	no
ENSG00000063127	50	100	19	SLC6A16	49289638	49325215	solute carrier family 6 member 16 [Source:HGNC Symbol;Acc:HGNC:13622]	no	no	no	no
ENSG00000063180	50	100	19	CA11	48637946	48646187	carbonic anhydrase 11 [Source:HGNC Symbol;Acc:HGNC:1370]	no	no	no	no
ENSG00000064270	50	100	16	ATP2C2	84368527	84464187	ATPase secretory pathway Ca2+ transporting 2 [Source:HGNC Symbol;Acc:HGNC:29103]	no	no	no	no
ENSG00000064989	50	100	2	CALCRL	187341964	187448460	calcitonin receptor like receptor [Source:HGNC Symbol;Acc:HGNC:16709]	no	no	no	no
ENSG00000067048	50	100	Y	DDX3Y	12904108	12920478	DEAD-box helicase 3 Y-linked [Source:HGNC Symbol;Acc:HGNC:2699]	no	no	no	no
ENSG00000072657	50	100	12	TRHDE	72087266	72670758	thyrotropin releasing hormone degrading enzyme [Source:HGNC Symbol;Acc:HGNC:30748]	no	no	no	no
ENSG00000073417	50	100	15	PDE8A	84980440	85139145	phosphodiesterase 8A [Source:HGNC Symbol;Acc:HGNC:8793]	no	no	no	no
ENSG00000073969	50	100	17	NSF	46590669	46757679	N-ethylmaleimide sensitive factor, vesicle fusing ATPase [Source:HGNC Symbol;Acc:HGNC:8016]	no	no	no	no
ENSG00000074211	50	100	4	PPP2R2C	6320578	6563600	protein phosphatase 2 regulatory subunit Bgamma [Source:HGNC Symbol;Acc:HGNC:9306]	no	no	no	no
ENSG00000076662	50	100	19	ICAM3	10333776	10339661	intercellular adhesion molecule 3 [Source:HGNC Symbol;Acc:HGNC:5346]	no	no	no	no
ENSG00000080823	50	100	14	MOK	102224500	102305190	MOK protein kinase [Source:HGNC Symbol;Acc:HGNC:9833]	no	no	no	no
ENSG00000080947	50	100	1	CROCCP3	16474396	16491307	CROCC pseudogene 3 [Source:HGNC Symbol;Acc:HGNC:29405]	no	no	no	no
ENSG00000081052	50	100	2	COL4A4	227002714	227164453	collagen type IV alpha 4 chain [Source:HGNC Symbol;Acc:HGNC:2206]	no	no	no	no
ENSG00000081818	50	100	5	PCDHB4	141121818	141125623	protocadherin beta 4 [Source:HGNC Symbol;Acc:HGNC:8689]	no	no	no	no
ENSG00000085465	50	100	1	OVGP1	111414319	111427735	oviductal glycoprotein 1 [Source:HGNC Symbol;Acc:HGNC:8524]	no	no	no	no
ENSG00000085514	50	100	7	PILRA	100367530	100400096	paired immunoglobin like type 2 receptor alpha [Source:HGNC Symbol;Acc:HGNC:20396]	no	no	no	no
ENSG00000086061	50	100	9	DNAJA1	33025273	33039907	DnaJ heat shock protein family (Hsp40) member A1 [Source:HGNC Symbol;Acc:HGNC:5229]	no	no	no	no
ENSG00000086570	50	100	5	FAT2	151504092	151591331	FAT atypical cadherin 2 [Source:HGNC Symbol;Acc:HGNC:3596]	no	no	no	no
ENSG00000087266	50	100	4	SH3BP2	2793071	2841098	SH3 domain binding protein 2 [Source:HGNC Symbol;Acc:HGNC:10825]	no	no	no	no
ENSG00000088538	50	100	3	DOCK3	50674927	51384198	dedicator of cytokinesis 3 [Source:HGNC Symbol;Acc:HGNC:2989]	no	no	no	no
ENSG00000088766	50	100	20	CRLS1	6006093	6040053	cardiolipin synthase 1 [Source:HGNC Symbol;Acc:HGNC:16148]	no	no	no	no
ENSG00000092295	50	100	14	TGM1	24249114	24264432	transglutaminase 1 [Source:HGNC Symbol;Acc:HGNC:11777]	no	no	no	no
ENSG00000092969	50	100	1	TGFB2	218345336	218444619	transforming growth factor beta 2 [Source:HGNC Symbol;Acc:HGNC:11768]	no	no	no	no
ENSG00000099284	50	100	10	MACROH2A2	70052544	70112282	macroH2A.2 histone [Source:HGNC Symbol;Acc:HGNC:14453]	no	no	no	no
ENSG00000099715	50	100	Y	PCDH11Y	5000226	5742224	protocadherin 11 Y-linked [Source:HGNC Symbol;Acc:HGNC:15813]	no	no	no	no
ENSG00000099725	50	100	Y	PRKY	7273972	7381548	protein kinase Y-linked (pseudogene) [Source:HGNC Symbol;Acc:HGNC:9444]	no	no	no	no
ENSG00000099834	50	100	11	CDHR5	616577	626078	cadherin related family member 5 [Source:HGNC Symbol;Acc:HGNC:7521]	no	no	no	no
ENSG00000099864	50	100	19	PALM	708935	748329	paralemmin [Source:HGNC Symbol;Acc:HGNC:8594]	no	no	no	no
ENSG00000099994	50	100	22	SUSD2	24181487	24189106	sushi domain containing 2 [Source:HGNC Symbol;Acc:HGNC:30667]	no	no	no	no
ENSG00000100354	50	100	22	TNRC6B	40044817	40335808	trinucleotide repeat containing adaptor 6B [Source:HGNC Symbol;Acc:HGNC:29190]	no	no	no	no
ENSG00000100784	50	100	14	RPS6KA5	90847861	91060641	ribosomal protein S6 kinase A5 [Source:HGNC Symbol;Acc:HGNC:10434]	no	no	no	no
ENSG00000101049	50	100	20	SGK2	43558968	43588237	serum/glucocorticoid regulated kinase 2 [Source:HGNC Symbol;Acc:HGNC:13900]	no	no	no	no
ENSG00000101098	50	100	20	RIMS4	44751808	44810546	regulating synaptic membrane exocytosis 4 [Source:HGNC Symbol;Acc:HGNC:16183]	no	no	no	no
ENSG00000101180	50	100	20	HRH3	62214960	62220278	histamine receptor H3 [Source:HGNC Symbol;Acc:HGNC:5184]	no	no	no	no
ENSG00000101331	50	100	20	CCM2L	32010438	32032180	CCM2 like scaffold protein [Source:HGNC Symbol;Acc:HGNC:16153]	no	no	no	no
ENSG00000101448	50	100	20	EPPIN	45540626	45547752	epididymal peptidase inhibitor [Source:HGNC Symbol;Acc:HGNC:15932]	no	no	no	no
ENSG00000101605	50	100	18	MYOM1	3066807	3219968	myomesin 1 [Source:HGNC Symbol;Acc:HGNC:7613]	no	no	no	no
ENSG00000102195	50	100	X	GPR50	151176584	151181465	G protein-coupled receptor 50 [Source:HGNC Symbol;Acc:HGNC:4506]	no	no	no	no
ENSG00000102383	50	100	X	ZDHHC15	75368427	75523502	zinc finger DHHC-type palmitoyltransferase 15 [Source:HGNC Symbol;Acc:HGNC:20342]	no	no	no	yes
ENSG00000102780	50	100	13	DGKH	42040036	42256578	diacylglycerol kinase eta [Source:HGNC Symbol;Acc:HGNC:2854]	no	no	no	no
ENSG00000102908	50	100	16	NFAT5	69565094	69704666	nuclear factor of activated T cells 5 [Source:HGNC Symbol;Acc:HGNC:7774]	no	no	no	no
ENSG00000103044	50	100	16	HAS3	69105653	69118719	hyaluronan synthase 3 [Source:HGNC Symbol;Acc:HGNC:4820]	no	no	no	no
ENSG00000103047	50	100	16	TANGO6	68843531	69085182	transport and golgi organization 6 homolog [Source:HGNC Symbol;Acc:HGNC:25749]	no	no	no	no
ENSG00000104093	50	100	15	DMXL2	51447711	51622833	Dmx like 2 [Source:HGNC Symbol;Acc:HGNC:2938]	no	no	no	no
ENSG00000104435	50	100	8	STMN2	79611117	79666158	stathmin 2 [Source:HGNC Symbol;Acc:HGNC:10577]	no	no	no	no
ENSG00000104728	50	100	8	ARHGEF10	1823926	1958641	Rho guanine nucleotide exchange factor 10 [Source:HGNC Symbol;Acc:HGNC:14103]	no	no	no	no
ENSG00000104856	50	100	19	RELB	45001461	45038192	RELB proto-oncogene, NF-kB subunit [Source:HGNC Symbol;Acc:HGNC:9956]	no	no	no	no
ENSG00000105339	50	100	8	DENND3	141117278	141195808	DENN domain containing 3 [Source:HGNC Symbol;Acc:HGNC:29134]	no	no	no	no
ENSG00000105877	50	100	7	DNAH11	21543039	21901839	dynein axonemal heavy chain 11 [Source:HGNC Symbol;Acc:HGNC:2942]	no	no	no	no
ENSG00000106089	50	100	7	STX1A	73699206	73719672	syntaxin 1A [Source:HGNC Symbol;Acc:HGNC:11433]	no	no	no	no
ENSG00000106128	50	100	7	GHRHR	30938669	30993254	growth hormone releasing hormone receptor [Source:HGNC Symbol;Acc:HGNC:4266]	no	no	no	no
ENSG00000106341	50	100	7	PPP1R17	31687215	31708455	protein phosphatase 1 regulatory subunit 17 [Source:HGNC Symbol;Acc:HGNC:16973]	no	no	no	no
ENSG00000107562	50	100	10	CXCL12	44370165	44386493	C-X-C motif chemokine ligand 12 [Source:HGNC Symbol;Acc:HGNC:10672]	no	no	no	no
ENSG00000108306	50	100	17	FBXL20	39252663	39402523	F-box and leucine rich repeat protein 20 [Source:HGNC Symbol;Acc:HGNC:24679]	no	no	no	no
ENSG00000108312	50	100	17	UBTF	44205033	44221626	upstream binding transcription factor [Source:HGNC Symbol;Acc:HGNC:12511]	no	no	no	no
ENSG00000108950	50	100	17	FAM20A	68535113	68601367	FAM20A golgi associated secretory pathway pseudokinase [Source:HGNC Symbol;Acc:HGNC:23015]	no	no	no	no
ENSG00000109771	50	100	4	LRP2BP	185363872	185395924	LRP2 binding protein [Source:HGNC Symbol;Acc:HGNC:25434]	no	no	no	no
ENSG00000109971	50	100	11	HSPA8	123057489	123063230	heat shock protein family A (Hsp70) member 8 [Source:HGNC Symbol;Acc:HGNC:5241]	no	no	no	no
ENSG00000109991	50	100	11	P2RX3	57338352	57372396	purinergic receptor P2X 3 [Source:HGNC Symbol;Acc:HGNC:8534]	no	no	no	no
ENSG00000110723	50	100	11	EXPH5	108505435	108593768	exophilin 5 [Source:HGNC Symbol;Acc:HGNC:30578]	no	no	no	no
ENSG00000110888	50	100	12	CAPRIN2	30709552	30823302	caprin family member 2 [Source:HGNC Symbol;Acc:HGNC:21259]	no	no	no	no
ENSG00000111799	50	100	6	COL12A1	75084326	75206267	collagen type XII alpha 1 chain [Source:HGNC Symbol;Acc:HGNC:2188]	no	no	no	no
ENSG00000111801	50	100	6	BTN3A3	26440472	26453415	butyrophilin subfamily 3 member A3 [Source:HGNC Symbol;Acc:HGNC:1140]	no	no	no	no
ENSG00000111981	50	100	6	ULBP1	149963943	149973715	UL16 binding protein 1 [Source:HGNC Symbol;Acc:HGNC:14893]	no	no	no	no
ENSG00000112619	50	100	6	PRPH2	42696598	42722597	peripherin 2 [Source:HGNC Symbol;Acc:HGNC:9942]	no	no	no	no
ENSG00000113205	50	100	5	PCDHB3	141100473	141103827	protocadherin beta 3 [Source:HGNC Symbol;Acc:HGNC:8688]	no	no	no	no
ENSG00000114374	50	100	Y	USP9Y	12537650	12860839	ubiquitin specific peptidase 9 Y-linked [Source:HGNC Symbol;Acc:HGNC:12633]	no	no	no	no
ENSG00000114473	50	100	3	IQCG	197889077	197960142	IQ motif containing G [Source:HGNC Symbol;Acc:HGNC:25251]	no	no	no	no
ENSG00000114670	50	100	3	NEK11	131026850	131350465	NIMA related kinase 11 [Source:HGNC Symbol;Acc:HGNC:18593]	no	no	no	no
ENSG00000114698	50	100	3	PLSCR4	146192335	146251179	phospholipid scramblase 4 [Source:HGNC Symbol;Acc:HGNC:16497]	no	no	no	no
ENSG00000114857	50	100	3	NKTR	42600655	42648735	natural killer cell triggering receptor [Source:HGNC Symbol;Acc:HGNC:7833]	no	no	no	no
ENSG00000115507	50	100	2	OTX1	63050057	63057836	orthodenticle homeobox 1 [Source:HGNC Symbol;Acc:HGNC:8521]	no	no	no	no
ENSG00000115705	50	100	2	TPO	1374066	1543711	thyroid peroxidase [Source:HGNC Symbol;Acc:HGNC:12015]	no	no	no	no
ENSG00000116014	50	100	19	KISS1R	917287	921005	KISS1 receptor [Source:HGNC Symbol;Acc:HGNC:4510]	no	no	no	no
ENSG00000116396	50	100	1	KCNC4	110210314	110283100	potassium voltage-gated channel subfamily C member 4 [Source:HGNC Symbol;Acc:HGNC:6236]	no	no	no	no
ENSG00000118058	50	100	11	KMT2A	118436456	118526832	lysine methyltransferase 2A [Source:HGNC Symbol;Acc:HGNC:7132]	no	no	no	no
ENSG00000118231	50	100	2	CRYGD	208121607	208124524	crystallin gamma D [Source:HGNC Symbol;Acc:HGNC:2411]	no	no	no	no
ENSG00000118946	50	100	13	PCDH17	57631744	57729311	protocadherin 17 [Source:HGNC Symbol;Acc:HGNC:14267]	no	no	no	no
ENSG00000119125	50	100	9	GDA	72114595	72257193	guanine deaminase [Source:HGNC Symbol;Acc:HGNC:4212]	no	no	no	no
ENSG00000119139	50	100	9	TJP2	69121264	69274615	tight junction protein 2 [Source:HGNC Symbol;Acc:HGNC:11828]	no	no	no	no
ENSG00000119547	50	100	18	ONECUT2	57435374	57491298	one cut homeobox 2 [Source:HGNC Symbol;Acc:HGNC:8139]	no	no	no	no
ENSG00000120256	50	100	6	LRP11	149818757	149864359	LDL receptor related protein 11 [Source:HGNC Symbol;Acc:HGNC:16936]	no	no	no	no
ENSG00000121297	50	100	19	TSHZ3	31149979	31349436	teashirt zinc finger homeobox 3 [Source:HGNC Symbol;Acc:HGNC:30700]	no	no	no	no
ENSG00000121390	50	100	13	PSPC1	19674752	19783019	paraspeckle component 1 [Source:HGNC Symbol;Acc:HGNC:20320]	no	no	no	no
ENSG00000122025	50	100	13	FLT3	28003274	28100592	fms related receptor tyrosine kinase 3 [Source:HGNC Symbol;Acc:HGNC:3765]	no	no	no	no
ENSG00000123095	50	100	12	BHLHE41	26120030	26125037	basic helix-loop-helix family member e41 [Source:HGNC Symbol;Acc:HGNC:16617]	no	no	no	no
ENSG00000123360	50	100	12	PDE1B	54549601	54579239	phosphodiesterase 1B [Source:HGNC Symbol;Acc:HGNC:8775]	no	no	no	no
ENSG00000124602	50	100	6	UNC5CL	41026895	41039221	unc-5 family C-terminal like [Source:HGNC Symbol;Acc:HGNC:21203]	no	no	no	no
ENSG00000124780	50	100	6	KCNK17	39299001	39314461	potassium two pore domain channel subfamily K member 17 [Source:HGNC Symbol;Acc:HGNC:14465]	no	no	no	no
ENSG00000124813	50	100	6	RUNX2	45328157	45664349	RUNX family transcription factor 2 [Source:HGNC Symbol;Acc:HGNC:10472]	no	no	no	no
ENSG00000124839	50	100	2	RAB17	237574322	237601614	RAB17, member RAS oncogene family [Source:HGNC Symbol;Acc:HGNC:16523]	no	no	no	no
ENSG00000125337	50	100	6	KIF25	167996241	168045091	kinesin family member 25 [Source:HGNC Symbol;Acc:HGNC:6390]	no	no	no	no
ENSG00000126010	50	100	X	GRPR	16123565	16153518	gastrin releasing peptide receptor [Source:HGNC Symbol;Acc:HGNC:4609]	no	no	yes	no
ENSG00000126091	50	100	1	ST3GAL3	43705824	43931165	ST3 beta-galactoside alpha-2,3-sialyltransferase 3 [Source:HGNC Symbol;Acc:HGNC:10866]	no	no	no	no
ENSG00000127364	50	100	7	TAS2R4	141776674	141781691	taste 2 receptor member 4 [Source:HGNC Symbol;Acc:HGNC:14911]	no	no	no	no
ENSG00000127366	50	100	7	TAS2R5	141790217	141791367	taste 2 receptor member 5 [Source:HGNC Symbol;Acc:HGNC:14912]	no	no	no	no
ENSG00000127481	50	100	1	UBR4	19074510	19210266	ubiquitin protein ligase E3 component n-recognin 4 [Source:HGNC Symbol;Acc:HGNC:30313]	no	no	no	no
ENSG00000127603	50	100	1	MACF1	39081316	39487177	microtubule actin crosslinking factor 1 [Source:HGNC Symbol;Acc:HGNC:13664]	no	no	no	no
ENSG00000127914	50	100	7	AKAP9	91940840	92110673	A-kinase anchoring protein 9 [Source:HGNC Symbol;Acc:HGNC:379]	no	no	no	no
ENSG00000128617	50	100	7	OPN1SW	128772485	128775794	opsin 1, short wave sensitive [Source:HGNC Symbol;Acc:HGNC:1012]	no	no	no	no
ENSG00000129048	50	100	3	ACKR4	132597270	132618967	atypical chemokine receptor 4 [Source:HGNC Symbol;Acc:HGNC:1611]	no	no	no	no
ENSG00000129204	50	100	17	USP6	5116032	5175034	ubiquitin specific peptidase 6 [Source:HGNC Symbol;Acc:HGNC:12629]	no	no	no	no
ENSG00000129437	50	100	19	KLK14	51077495	51084245	kallikrein related peptidase 14 [Source:HGNC Symbol;Acc:HGNC:6362]	no	no	no	no
ENSG00000129824	50	100	Y	RPS4Y1	2841602	2932000	ribosomal protein S4 Y-linked 1 [Source:HGNC Symbol;Acc:HGNC:10425]	no	no	no	no
ENSG00000130222	50	100	9	GADD45G	89605012	89606555	growth arrest and DNA damage inducible gamma [Source:HGNC Symbol;Acc:HGNC:4097]	no	no	no	no
ENSG00000130287	50	100	19	NCAN	19211958	19252233	neurocan [Source:HGNC Symbol;Acc:HGNC:2465]	no	no	no	no
ENSG00000130653	50	100	9	PNPLA7	137459952	137550402	patatin like phospholipase domain containing 7 [Source:HGNC Symbol;Acc:HGNC:24768]	no	no	no	no
ENSG00000130702	50	100	20	LAMA5	62307955	62367312	laminin subunit alpha 5 [Source:HGNC Symbol;Acc:HGNC:6485]	no	no	no	no
ENSG00000130856	50	100	18	ZNF236	76822557	76972901	zinc finger protein 236 [Source:HGNC Symbol;Acc:HGNC:13028]	no	no	no	no
ENSG00000131002	50	100	Y	TXLNGY	19567382	19604120	taxilin gamma pseudogene, Y-linked [Source:HGNC Symbol;Acc:HGNC:18473]	no	no	no	no
ENSG00000131080	50	100	X	EDA2R	66595637	66639298	ectodysplasin A2 receptor [Source:HGNC Symbol;Acc:HGNC:17756]	no	no	no	yes
ENSG00000131471	50	100	17	AOC3	42851184	42858130	amine oxidase copper containing 3 [Source:HGNC Symbol;Acc:HGNC:550]	no	no	no	no
ENSG00000131771	50	100	17	PPP1R1B	39626740	39636626	protein phosphatase 1 regulatory inhibitor subunit 1B [Source:HGNC Symbol;Acc:HGNC:9287]	no	no	no	no
ENSG00000132321	50	100	2	IQCA1	236324147	236507535	IQ motif containing with AAA domain 1 [Source:HGNC Symbol;Acc:HGNC:26195]	no	no	no	no
ENSG00000133519	50	100	22	ZDHHC8BP	23397938	23402157	ZDHHC8B, pseudogene [Source:HGNC Symbol;Acc:HGNC:26461]	no	no	no	no
ENSG00000133636	50	100	12	NTS	85874295	85882992	neurotensin [Source:HGNC Symbol;Acc:HGNC:8038]	no	no	no	no
ENSG00000134363	50	100	5	FST	53480626	53487134	follistatin [Source:HGNC Symbol;Acc:HGNC:3971]	no	no	no	no
ENSG00000134575	50	100	11	ACP2	47239302	47248906	acid phosphatase 2, lysosomal [Source:HGNC Symbol;Acc:HGNC:123]	no	no	no	no
ENSG00000134955	50	100	11	SLC37A2	125063302	125090516	solute carrier family 37 member 2 [Source:HGNC Symbol;Acc:HGNC:20644]	no	no	no	no
ENSG00000135976	50	100	2	ANKRD36	97113153	97264521	ankyrin repeat domain 36 [Source:HGNC Symbol;Acc:HGNC:24079]	no	no	no	no
ENSG00000136167	50	100	13	LCP1	46125920	46211871	lymphocyte cytosolic protein 1 [Source:HGNC Symbol;Acc:HGNC:6528]	no	no	no	no
ENSG00000136305	50	100	14	CIDEB	24305187	24311430	cell death inducing DFFA like effector b [Source:HGNC Symbol;Acc:HGNC:1977]	no	no	no	no
ENSG00000136449	50	100	17	MYCBPAP	50508425	50531501	MYCBP associated protein [Source:HGNC Symbol;Acc:HGNC:19677]	no	no	no	no
ENSG00000137462	50	100	4	TLR2	153684070	153706260	toll like receptor 2 [Source:HGNC Symbol;Acc:HGNC:11848]	no	no	no	no
ENSG00000137558	50	100	8	PI15	74824534	74855029	peptidase inhibitor 15 [Source:HGNC Symbol;Acc:HGNC:8946]	no	no	no	no
ENSG00000137726	50	100	11	FXYD6	117836976	117877486	FXYD domain containing ion transport regulator 6 [Source:HGNC Symbol;Acc:HGNC:4030]	no	no	no	no
ENSG00000137857	50	100	15	DUOX1	45129933	45165576	dual oxidase 1 [Source:HGNC Symbol;Acc:HGNC:3062]	no	no	no	no
ENSG00000137968	50	100	1	SLC44A5	75202129	75611114	solute carrier family 44 member 5 [Source:HGNC Symbol;Acc:HGNC:28524]	no	no	no	no
ENSG00000138100	50	100	2	TRIM54	27282429	27307439	tripartite motif containing 54 [Source:HGNC Symbol;Acc:HGNC:16008]	no	no	no	no
ENSG00000138496	50	100	3	PARP9	122527924	122564577	poly(ADP-ribose) polymerase family member 9 [Source:HGNC Symbol;Acc:HGNC:24118]	no	no	no	no
ENSG00000138688	50	100	4	BLTP1	122152331	122364167	bridge-like lipid transfer protein family member 1 [Source:HGNC Symbol;Acc:HGNC:26953]	no	no	no	no
ENSG00000138759	50	100	4	FRAS1	78057323	78544269	Fraser extracellular matrix complex subunit 1 [Source:HGNC Symbol;Acc:HGNC:19185]	no	no	no	no
ENSG00000139192	50	100	12	TAPBPL	6451690	6466517	TAP binding protein like [Source:HGNC Symbol;Acc:HGNC:30683]	no	no	no	no
ENSG00000139531	50	100	12	SUOX	55997180	56006641	sulfite oxidase [Source:HGNC Symbol;Acc:HGNC:11460]	no	no	no	no
ENSG00000139547	50	100	12	RDH16	56951431	56959374	retinol dehydrogenase 16 [Source:HGNC Symbol;Acc:HGNC:29674]	no	no	no	no
ENSG00000140090	50	100	14	SLC24A4	92322581	92501481	solute carrier family 24 member 4 [Source:HGNC Symbol;Acc:HGNC:10978]	no	no	no	no
ENSG00000140543	50	100	15	DET1	88494440	88546681	DET1 partner of COP1 E3 ubiquitin ligase [Source:HGNC Symbol;Acc:HGNC:25477]	no	no	no	no
ENSG00000141076	50	100	16	UTP4	69131291	69231130	UTP4 small subunit processome component [Source:HGNC Symbol;Acc:HGNC:1983]	no	no	no	no
ENSG00000141431	50	100	18	ASXL3	33578219	33751195	ASXL transcriptional regulator 3 [Source:HGNC Symbol;Acc:HGNC:29357]	no	no	no	no
ENSG00000142178	50	100	21	SIK1	43414483	43427131	salt inducible kinase 1 [Source:HGNC Symbol;Acc:HGNC:11142]	no	no	no	no
ENSG00000142233	50	100	19	NTN5	48661407	48673081	netrin 5 [Source:HGNC Symbol;Acc:HGNC:25208]	no	no	no	no
ENSG00000142303	50	100	19	ADAMTS10	8580240	8610735	ADAM metallopeptidase with thrombospondin type 1 motif 10 [Source:HGNC Symbol;Acc:HGNC:13201]	no	no	no	no
ENSG00000142684	50	100	1	ZNF593	26169908	26170873	zinc finger protein 593 [Source:HGNC Symbol;Acc:HGNC:30943]	no	no	no	no
ENSG00000142694	50	100	1	EVA1B	36322030	36324154	eva-1 homolog B [Source:HGNC Symbol;Acc:HGNC:25558]	no	no	no	no
ENSG00000142798	50	100	1	HSPG2	21822244	21937310	heparan sulfate proteoglycan 2 [Source:HGNC Symbol;Acc:HGNC:5273]	no	no	no	no
ENSG00000143107	50	100	1	FNDC7	108712908	108742749	fibronectin type III domain containing 7 [Source:HGNC Symbol;Acc:HGNC:26668]	no	no	no	no
ENSG00000143195	50	100	1	ILDR2	166895711	166975540	immunoglobulin like domain containing receptor 2 [Source:HGNC Symbol;Acc:HGNC:18131]	no	no	no	no
ENSG00000143341	50	100	1	HMCN1	185734391	186190949	hemicentin 1 [Source:HGNC Symbol;Acc:HGNC:19194]	no	no	no	no
ENSG00000143816	50	100	1	WNT9A	227918656	227947932	Wnt family member 9A [Source:HGNC Symbol;Acc:HGNC:12778]	no	no	no	no
ENSG00000143858	50	100	1	SYT2	202590596	202710454	synaptotagmin 2 [Source:HGNC Symbol;Acc:HGNC:11510]	no	no	no	no
ENSG00000144026	50	100	2	ZNF514	95122087	95165668	zinc finger protein 514 [Source:HGNC Symbol;Acc:HGNC:25894]	no	no	no	no
ENSG00000145113	50	100	3	MUC4	195746765	195811973	mucin 4, cell surface associated [Source:HGNC Symbol;Acc:HGNC:7514]	no	no	no	no
ENSG00000145391	50	100	4	SETD7	139495941	139606699	SET domain containing 7, histone lysine methyltransferase [Source:HGNC Symbol;Acc:HGNC:30412]	no	no	no	no
ENSG00000145416	50	100	4	MARCHF1	163524298	164384050	membrane associated ring-CH-type finger 1 [Source:HGNC Symbol;Acc:HGNC:26077]	no	no	no	no
ENSG00000145506	50	100	5	NKD2	1008802	1038943	NKD inhibitor of WNT signaling pathway 2 [Source:HGNC Symbol;Acc:HGNC:17046]	no	no	no	no
ENSG00000145632	50	100	5	PLK2	58453982	58460139	polo like kinase 2 [Source:HGNC Symbol;Acc:HGNC:19699]	no	no	no	no
ENSG00000145934	50	100	5	TENM2	166979029	168264157	teneurin transmembrane protein 2 [Source:HGNC Symbol;Acc:HGNC:29943]	no	no	no	no
ENSG00000145990	50	100	6	GFOD1	13357830	13487662	glucose-fructose oxidoreductase domain containing 1 [Source:HGNC Symbol;Acc:HGNC:21096]	no	no	no	no
ENSG00000147166	50	100	X	ITGB1BP2	71301750	71305371	integrin subunit beta 1 binding protein 2 [Source:HGNC Symbol;Acc:HGNC:6154]	no	no	no	yes
ENSG00000147246	50	100	X	HTR2C	114584078	114910061	5-hydroxytryptamine receptor 2C [Source:HGNC Symbol;Acc:HGNC:5295]	no	yes	no	no
ENSG00000147364	50	100	8	FBXO25	406428	477967	F-box protein 25 [Source:HGNC Symbol;Acc:HGNC:13596]	no	no	no	no
ENSG00000147421	50	100	8	HMBOX1	28890395	29064764	homeobox containing 1 [Source:HGNC Symbol;Acc:HGNC:26137]	no	no	no	no
ENSG00000147437	50	100	8	GNRH1	25419258	25424654	gonadotropin releasing hormone 1 [Source:HGNC Symbol;Acc:HGNC:4419]	no	no	no	no
ENSG00000148600	50	100	10	CDHR1	84194537	84219621	cadherin related family member 1 [Source:HGNC Symbol;Acc:HGNC:14550]	no	no	no	no
ENSG00000148773	50	100	10	MKI67	128096659	128126423	marker of proliferation Ki-67 [Source:HGNC Symbol;Acc:HGNC:7107]	no	no	no	no
ENSG00000148926	50	100	11	ADM	10305073	10307397	adrenomedullin [Source:HGNC Symbol;Acc:HGNC:259]	no	no	no	no
ENSG00000150594	50	100	10	ADRA2A	111077029	111080907	adrenoceptor alpha 2A [Source:HGNC Symbol;Acc:HGNC:281]	no	no	no	no
ENSG00000150627	50	100	4	WDR17	176065841	176182818	WD repeat domain 17 [Source:HGNC Symbol;Acc:HGNC:16661]	no	no	no	no
ENSG00000150672	50	100	11	DLG2	83455012	85628335	discs large MAGUK scaffold protein 2 [Source:HGNC Symbol;Acc:HGNC:2901]	no	no	no	no
ENSG00000150722	50	100	2	PPP1R1C	181954241	182131398	protein phosphatase 1 regulatory inhibitor subunit 1C [Source:HGNC Symbol;Acc:HGNC:14940]	no	no	no	no
ENSG00000150995	50	100	3	ITPR1	4493345	4847506	inositol 1,4,5-trisphosphate receptor type 1 [Source:HGNC Symbol;Acc:HGNC:6180]	no	no	no	no
ENSG00000151914	50	100	6	DST	56457987	56954830	dystonin [Source:HGNC Symbol;Acc:HGNC:1090]	no	no	no	no
ENSG00000151948	50	100	12	GLT1D1	128853427	128984968	glycosyltransferase 1 domain containing 1 [Source:HGNC Symbol;Acc:HGNC:26483]	no	no	no	no
ENSG00000151952	50	100	12	TMEM132D	129071725	129904025	transmembrane protein 132D [Source:HGNC Symbol;Acc:HGNC:29411]	no	no	no	no
ENSG00000152092	50	100	1	ASTN1	176857302	177164973	astrotactin 1 [Source:HGNC Symbol;Acc:HGNC:773]	no	no	no	no
ENSG00000152527	50	100	2	PLEKHH2	43637260	43767987	pleckstrin homology, MyTH4 and FERM domain containing H2 [Source:HGNC Symbol;Acc:HGNC:30506]	no	no	no	no
ENSG00000153093	50	100	2	ACOXL	110732539	111118548	acyl-CoA oxidase like [Source:HGNC Symbol;Acc:HGNC:25621]	no	no	no	no
ENSG00000153898	50	100	1	MCOLN2	84925583	84997113	mucolipin TRP cation channel 2 [Source:HGNC Symbol;Acc:HGNC:13357]	no	no	no	no
ENSG00000154358	50	100	1	OBSCN	228208044	228378876	obscurin, cytoskeletal calmodulin and titin-interacting RhoGEF [Source:HGNC Symbol;Acc:HGNC:15719]	no	no	no	no
ENSG00000154898	50	100	17	CCDC144CP	20321150	20403557	coiled-coil domain containing 144C, pseudogene [Source:HGNC Symbol;Acc:HGNC:29073]	no	no	no	no
ENSG00000155269	50	100	4	GPR78	8558725	8619761	G protein-coupled receptor 78 [Source:HGNC Symbol;Acc:HGNC:4528]	no	no	no	no
ENSG00000155657	50	100	2	TTN	178525989	178830802	titin [Source:HGNC Symbol;Acc:HGNC:12403]	no	no	no	no
ENSG00000157388	50	100	3	CACNA1D	53328963	53813733	calcium voltage-gated channel subunit alpha1 D [Source:HGNC Symbol;Acc:HGNC:1391]	no	no	no	no
ENSG00000157542	50	100	21	KCNJ6	37607373	38121345	potassium inwardly rectifying channel subfamily J member 6 [Source:HGNC Symbol;Acc:HGNC:6267]	no	no	no	no
ENSG00000157554	50	100	21	ERG	38380027	38661780	ETS transcription factor ERG [Source:HGNC Symbol;Acc:HGNC:3446]	no	no	no	no
ENSG00000158125	50	100	2	XDH	31334321	31414742	xanthine dehydrogenase [Source:HGNC Symbol;Acc:HGNC:12805]	no	no	no	no
ENSG00000158163	50	100	3	DZIP1L	138061990	138115818	DAZ interacting zinc finger protein 1 like [Source:HGNC Symbol;Acc:HGNC:26551]	no	no	no	no
ENSG00000158711	50	100	1	ELK4	205597556	205632011	ETS transcription factor ELK4 [Source:HGNC Symbol;Acc:HGNC:3326]	no	no	no	no
ENSG00000158764	50	100	1	ITLN2	160945025	160954809	intelectin 2 [Source:HGNC Symbol;Acc:HGNC:20599]	no	no	no	no
ENSG00000159433	50	100	15	STARD9	42575606	42720998	StAR related lipid transfer domain containing 9 [Source:HGNC Symbol;Acc:HGNC:19162]	no	no	no	no
ENSG00000159445	50	100	1	THEM4	151870866	151909637	thioesterase superfamily member 4 [Source:HGNC Symbol;Acc:HGNC:17947]	no	no	no	no
ENSG00000159712	50	100	9	ANKRD18CP	97156570	97221235	ankyrin repeat domain 18C, pseudogene [Source:HGNC Symbol;Acc:HGNC:43601]	no	no	no	no
ENSG00000159733	50	100	4	ZFYVE28	2269582	2418651	zinc finger FYVE-type containing 28 [Source:HGNC Symbol;Acc:HGNC:29334]	no	no	no	no
ENSG00000159958	50	100	22	TNFRSF13C	41922032	41926806	TNF receptor superfamily member 13C [Source:HGNC Symbol;Acc:HGNC:17755]	no	no	no	no
ENSG00000160223	50	100	21	ICOSLG	44215382	44241446	inducible T cell costimulator ligand [Source:HGNC Symbol;Acc:HGNC:17087]	no	no	no	no
ENSG00000160282	50	100	21	FTCD	46136160	46155579	formimidoyltransferase cyclodeaminase [Source:HGNC Symbol;Acc:HGNC:3974]	no	no	no	no
ENSG00000160305	50	100	21	DIP2A	46458891	46570015	disco interacting protein 2 homolog A [Source:HGNC Symbol;Acc:HGNC:17217]	no	no	no	no
ENSG00000160606	50	100	17	TLCD1	28724348	28727935	TLC domain containing 1 [Source:HGNC Symbol;Acc:HGNC:25177]	no	no	no	no
ENSG00000160961	50	100	19	ZNF333	14689801	14733746	zinc finger protein 333 [Source:HGNC Symbol;Acc:HGNC:15624]	no	no	no	no
ENSG00000161940	50	100	17	BCL6B	7023050	7030290	BCL6B transcription repressor [Source:HGNC Symbol;Acc:HGNC:1002]	no	no	no	no
ENSG00000162433	50	100	1	AK4	65147549	65232145	adenylate kinase 4 [Source:HGNC Symbol;Acc:HGNC:363]	no	no	no	no
ENSG00000162706	50	100	1	CADM3	159171609	159203313	cell adhesion molecule 3 [Source:HGNC Symbol;Acc:HGNC:17601]	no	no	no	no
ENSG00000162981	50	100	2	LRATD1	14632700	14650814	LRAT domain containing 1 [Source:HGNC Symbol;Acc:HGNC:20743]	no	no	no	no
ENSG00000163644	50	100	4	PPM1K	88257620	88284769	protein phosphatase, Mg2+/Mn2+ dependent 1K [Source:HGNC Symbol;Acc:HGNC:25415]	no	no	no	no
ENSG00000163704	50	100	3	PRRT3	9939450	9952408	proline rich transmembrane protein 3 [Source:HGNC Symbol;Acc:HGNC:26591]	no	no	no	no
ENSG00000163945	50	100	4	UVSSA	1345691	1395989	UV stimulated scaffold protein A [Source:HGNC Symbol;Acc:HGNC:29304]	no	no	no	no
ENSG00000164049	50	100	3	FBXW12	48372219	48401259	F-box and WD repeat domain containing 12 [Source:HGNC Symbol;Acc:HGNC:20729]	no	no	no	no
ENSG00000164199	50	100	5	ADGRV1	90529344	91164437	adhesion G protein-coupled receptor V1 [Source:HGNC Symbol;Acc:HGNC:17416]	no	no	no	no
ENSG00000164708	50	100	7	PGAM2	44062727	44065567	phosphoglycerate mutase 2 [Source:HGNC Symbol;Acc:HGNC:8889]	no	no	no	no
ENSG00000165092	50	100	9	ALDH1A1	72900671	73080442	aldehyde dehydrogenase 1 family member A1 [Source:HGNC Symbol;Acc:HGNC:402]	no	no	no	no
ENSG00000165140	50	100	9	FBP1	94603133	94640249	fructose-bisphosphatase 1 [Source:HGNC Symbol;Acc:HGNC:3606]	no	no	no	no
ENSG00000165215	50	100	7	CLDN3	73768997	73770270	claudin 3 [Source:HGNC Symbol;Acc:HGNC:2045]	no	no	no	no
ENSG00000165246	50	100	Y	NLGN4Y	14522573	14845654	neuroligin 4 Y-linked [Source:HGNC Symbol;Acc:HGNC:15529]	no	no	no	no
ENSG00000165588	50	100	14	OTX2	56799905	56816693	orthodenticle homeobox 2 [Source:HGNC Symbol;Acc:HGNC:8522]	no	no	no	no
ENSG00000166343	50	100	10	MSS51	73423579	73433561	MSS51 mitochondrial translational activator [Source:HGNC Symbol;Acc:HGNC:21000]	no	no	no	no
ENSG00000166426	50	100	15	CRABP1	78340353	78348225	cellular retinoic acid binding protein 1 [Source:HGNC Symbol;Acc:HGNC:2338]	no	no	no	no
ENSG00000166436	50	100	11	TRIM66	8612037	8682694	tripartite motif containing 66 [Source:HGNC Symbol;Acc:HGNC:29005]	no	no	no	no
ENSG00000166573	50	100	18	GALR1	77249848	77277900	galanin receptor 1 [Source:HGNC Symbol;Acc:HGNC:4132]	no	no	no	no
ENSG00000166750	50	100	17	SLFN5	35243071	35273655	schlafen family member 5 [Source:HGNC Symbol;Acc:HGNC:28286]	no	no	no	no
ENSG00000166796	50	100	11	LDHC	18412318	18452063	lactate dehydrogenase C [Source:HGNC Symbol;Acc:HGNC:6544]	no	no	no	no
ENSG00000166839	50	100	15	ANKDD1A	64911902	64958691	ankyrin repeat and death domain containing 1A [Source:HGNC Symbol;Acc:HGNC:28002]	no	no	no	no
ENSG00000166997	50	100	7	CNPY4	100119634	100125508	canopy FGF signaling regulator 4 [Source:HGNC Symbol;Acc:HGNC:28631]	no	no	no	no
ENSG00000167393	50	100	X	PPP2R3B	333933	386955	protein phosphatase 2 regulatory subunit B''beta [Source:HGNC Symbol;Acc:HGNC:13417]	PAR1	no	no	no
ENSG00000167524	50	100	17	RSKR	28455752	28614197	ribosomal protein S6 kinase related [Source:HGNC Symbol;Acc:HGNC:26314]	no	no	no	no
ENSG00000167548	50	100	12	KMT2D	49018975	49060794	lysine methyltransferase 2D [Source:HGNC Symbol;Acc:HGNC:7133]	no	no	no	no
ENSG00000167755	50	100	19	KLK6	50958631	50969673	kallikrein related peptidase 6 [Source:HGNC Symbol;Acc:HGNC:6367]	no	no	no	no
ENSG00000167880	50	100	17	EVPL	76004502	76027306	envoplakin [Source:HGNC Symbol;Acc:HGNC:3503]	no	no	no	no
ENSG00000167895	50	100	17	TMC8	78130770	78142968	transmembrane channel like 8 [Source:HGNC Symbol;Acc:HGNC:20474]	no	no	no	no
ENSG00000168038	50	100	3	ULK4	41246599	41962130	unc-51 like kinase 4 [Source:HGNC Symbol;Acc:HGNC:15784]	no	no	no	no
ENSG00000168306	50	100	3	ACOX2	58505136	58537283	acyl-CoA oxidase 2 [Source:HGNC Symbol;Acc:HGNC:120]	no	no	no	no
ENSG00000168421	50	100	4	RHOH	40191011	40246967	ras homolog family member H [Source:HGNC Symbol;Acc:HGNC:686]	no	no	no	no
ENSG00000168679	50	100	1	SLC16A4	110362851	110391082	solute carrier family 16 member 4 [Source:HGNC Symbol;Acc:HGNC:10925]	no	no	no	no
ENSG00000168772	50	100	4	CXXC4	104468308	104494901	CXXC finger protein 4 [Source:HGNC Symbol;Acc:HGNC:24593]	no	no	no	no
ENSG00000168961	50	100	17	LGALS9	27629798	27649560	galectin 9 [Source:HGNC Symbol;Acc:HGNC:6570]	no	no	no	no
ENSG00000169174	50	100	1	PCSK9	55039447	55064852	proprotein convertase subtilisin/kexin type 9 [Source:HGNC Symbol;Acc:HGNC:20001]	no	no	no	no
ENSG00000169288	50	100	4	MRPL1	77862830	77952785	mitochondrial ribosomal protein L1 [Source:HGNC Symbol;Acc:HGNC:14275]	no	no	no	no
ENSG00000169856	50	100	15	ONECUT1	52755053	52791078	one cut homeobox 1 [Source:HGNC Symbol;Acc:HGNC:8138]	no	no	no	no
ENSG00000169894	50	100	7	MUC3A	100949534	100968347	mucin 3A, cell surface associated [Source:HGNC Symbol;Acc:HGNC:7513]	no	no	no	no
ENSG00000169955	50	100	16	ZNF747	30530367	30535347	zinc finger protein 747 [Source:HGNC Symbol;Acc:HGNC:28350]	no	no	no	no
ENSG00000170160	50	100	17	CCDC144A	16689537	16777881	coiled-coil domain containing 144A [Source:HGNC Symbol;Acc:HGNC:29072]	no	no	no	no
ENSG00000170500	50	100	2	LONRF2	100271875	100322501	LON peptidase N-terminal domain and ring finger 2 [Source:HGNC Symbol;Acc:HGNC:24788]	no	no	no	no
ENSG00000170525	50	100	10	PFKFB3	6144934	6254644	6-phosphofructo-2-kinase/fructose-2,6-biphosphatase 3 [Source:HGNC Symbol;Acc:HGNC:8874]	no	no	no	no
ENSG00000170667	50	100	7	RASA4B	102479976	102517777	RAS p21 protein activator 4B [Source:HGNC Symbol;Acc:HGNC:35202]	no	no	no	no
ENSG00000170961	50	100	8	HAS2	121612116	121641440	hyaluronan synthase 2 [Source:HGNC Symbol;Acc:HGNC:4819]	no	no	no	no
ENSG00000171044	50	100	8	XKR6	10896045	11201833	XK related 6 [Source:HGNC Symbol;Acc:HGNC:27806]	no	no	no	no
ENSG00000171208	50	100	16	NETO2	47077703	47143945	neuropilin and tolloid like 2 [Source:HGNC Symbol;Acc:HGNC:14644]	no	no	no	no
ENSG00000171246	50	100	17	NPTX1	80466834	80477843	neuronal pentraxin 1 [Source:HGNC Symbol;Acc:HGNC:7952]	no	no	no	no
ENSG00000171551	50	100	2	ECEL1	232479827	232487834	endothelin converting enzyme like 1 [Source:HGNC Symbol;Acc:HGNC:3147]	no	no	no	no
ENSG00000171724	50	100	16	VAT1L	77788564	77980107	vesicle amine transport 1 like [Source:HGNC Symbol;Acc:HGNC:29315]	no	no	no	no
ENSG00000171794	50	100	10	UTF1	133230217	133231558	undifferentiated embryonic cell transcription factor 1 [Source:HGNC Symbol;Acc:HGNC:12634]	no	no	no	no
ENSG00000172137	50	100	16	CALB2	71358713	71390436	calbindin 2 [Source:HGNC Symbol;Acc:HGNC:1435]	no	no	no	no
ENSG00000172339	50	100	1	ALG14	94974405	95072951	ALG14 UDP-N-acetylglucosaminyltransferase subunit [Source:HGNC Symbol;Acc:HGNC:28287]	no	no	no	no
ENSG00000172461	50	100	6	FUT9	96015974	96215612	fucosyltransferase 9 [Source:HGNC Symbol;Acc:HGNC:4020]	no	no	no	no
ENSG00000172716	50	100	17	SLFN11	35350305	35373701	schlafen family member 11 [Source:HGNC Symbol;Acc:HGNC:26633]	no	no	no	no
ENSG00000173064	50	100	12	HECTD4	112160188	112382439	HECT domain E3 ubiquitin protein ligase 4 [Source:HGNC Symbol;Acc:HGNC:26611]	no	no	no	no
ENSG00000173295	50	100	8	FAM86B3P	8228605	8237275	family with sequence similarity 86 member B3, pseudogene [Source:HGNC Symbol;Acc:HGNC:44371]	no	no	no	no
ENSG00000173349	50	100	2	SFT2D3	127701497	127705242	SFT2 domain containing 3 [Source:HGNC Symbol;Acc:HGNC:28767]	no	no	no	no
ENSG00000173401	50	100	12	GLIPR1L1	75334670	75370560	GLIPR1 like 1 [Source:HGNC Symbol;Acc:HGNC:28392]	no	no	no	no
ENSG00000173404	50	100	20	INSM1	20368104	20370949	INSM transcriptional repressor 1 [Source:HGNC Symbol;Acc:HGNC:6090]	no	no	no	no
ENSG00000173559	50	100	2	NABP1	191678068	191741097	nucleic acid binding protein 1 [Source:HGNC Symbol;Acc:HGNC:26232]	no	no	no	no
ENSG00000173611	50	100	9	SCAI	124942608	125143528	suppressor of cancer cell invasion [Source:HGNC Symbol;Acc:HGNC:26709]	no	no	no	no
ENSG00000173705	50	100	3	SUSD5	33150043	33218810	sushi domain containing 5 [Source:HGNC Symbol;Acc:HGNC:29061]	no	no	no	no
ENSG00000173821	50	100	17	RNF213	80260852	80398794	ring finger protein 213 [Source:HGNC Symbol;Acc:HGNC:14539]	no	no	no	no
ENSG00000173889	50	100	3	PHC3	170086732	170181749	polyhomeotic homolog 3 [Source:HGNC Symbol;Acc:HGNC:15682]	no	no	no	no
ENSG00000174004	50	100	3	NRROS	196639694	196662004	negative regulator of reactive oxygen species [Source:HGNC Symbol;Acc:HGNC:24613]	no	no	no	no
ENSG00000174501	50	100	2	ANKRD36C	95836919	95991831	ankyrin repeat domain 36C [Source:HGNC Symbol;Acc:HGNC:32946]	no	no	no	no
ENSG00000174516	50	100	11	PELI3	66466327	66477337	pellino E3 ubiquitin protein ligase family member 3 [Source:HGNC Symbol;Acc:HGNC:30010]	no	no	no	no
ENSG00000175344	50	100	15	CHRNA7	31923438	32173018	cholinergic receptor nicotinic alpha 7 subunit [Source:HGNC Symbol;Acc:HGNC:1960]	no	no	no	no
ENSG00000175538	50	100	11	KCNE3	74454841	74467729	potassium voltage-gated channel subfamily E regulatory subunit 3 [Source:HGNC Symbol;Acc:HGNC:6243]	no	no	no	no
ENSG00000175894	50	100	21	TSPEAR	44497893	44711572	thrombospondin type laminin G domain and EAR repeats [Source:HGNC Symbol;Acc:HGNC:1268]	no	no	no	no
ENSG00000176410	50	100	7	DNAJC30	73680918	73683453	DnaJ heat shock protein family (Hsp40) member C30 [Source:HGNC Symbol;Acc:HGNC:16410]	no	no	no	no
ENSG00000176531	50	100	19	PHLDB3	43474954	43504935	pleckstrin homology like domain family B member 3 [Source:HGNC Symbol;Acc:HGNC:30499]	no	no	no	no
ENSG00000176641	50	100	18	RNF152	61808067	61894247	ring finger protein 152 [Source:HGNC Symbol;Acc:HGNC:26811]	no	no	no	no
ENSG00000176728	50	100	Y	TTTY14	18772706	19077416	testis-specific transcript, Y-linked 14 [Source:HGNC Symbol;Acc:HGNC:18495]	no	no	no	no
ENSG00000176912	50	100	18	TYMSOS	630886	658350	TYMS opposite strand RNA [Source:HGNC Symbol;Acc:HGNC:29553]	no	no	no	no
ENSG00000177483	50	100	2	RBM44	237798389	237842808	RNA binding motif protein 44 [Source:HGNC Symbol;Acc:HGNC:24756]	no	no	no	no
ENSG00000177551	50	100	1	NHLH2	115836377	115843917	nescient helix-loop-helix 2 [Source:HGNC Symbol;Acc:HGNC:7818]	no	no	no	no
ENSG00000178127	50	100	18	NDUFV2	9102630	9134345	NADH:ubiquinone oxidoreductase core subunit V2 [Source:HGNC Symbol;Acc:HGNC:7717]	no	no	no	no
ENSG00000178233	50	100	6	TMEM151B	44270450	44307506	transmembrane protein 151B [Source:HGNC Symbol;Acc:HGNC:21315]	no	no	no	no
ENSG00000178502	50	100	17	KLHL11	41848518	41865423	kelch like family member 11 [Source:HGNC Symbol;Acc:HGNC:19008]	no	no	no	no
ENSG00000178605	50	100	X	GTPBP6	304529	318796	GTP binding protein 6 (putative) [Source:HGNC Symbol;Acc:HGNC:30189]	PAR1	no	no	no
ENSG00000178852	50	100	17	EFCAB13	47323290	47441312	EF-hand calcium binding domain 13 [Source:HGNC Symbol;Acc:HGNC:26864]	no	no	no	no
ENSG00000178922	50	100	1	HYI	43450989	43453989	hydroxypyruvate isomerase (putative) [Source:HGNC Symbol;Acc:HGNC:26948]	no	no	no	no
ENSG00000179532	50	100	11	DNHD1	6497260	6593758	dynein heavy chain domain 1 [Source:HGNC Symbol;Acc:HGNC:26532]	no	no	no	no
ENSG00000180071	50	100	9	ANKRD18A	38540567	38620596	ankyrin repeat domain 18A [Source:HGNC Symbol;Acc:HGNC:23643]	no	no	no	no
ENSG00000180178	50	100	2	FAR2P1	130028309	130040560	fatty acyl-CoA reductase 2 pseudogene 1 [Source:HGNC Symbol;Acc:HGNC:49284]	no	no	no	no
ENSG00000180767	50	100	3	CHST13	126524155	126543291	carbohydrate sulfotransferase 13 [Source:HGNC Symbol;Acc:HGNC:21755]	no	no	no	no
ENSG00000180921	50	100	8	FAM83H	143723933	143738234	family with sequence similarity 83 member H [Source:HGNC Symbol;Acc:HGNC:24797]	no	no	no	no
ENSG00000180953	50	100	15	ST20	79898840	79923702	suppressor of tumorigenicity 20 [Source:HGNC Symbol;Acc:HGNC:33520]	no	no	no	no
ENSG00000181097	50	100	8	LINC02878	143696154	143698413	long intergenic non-protein coding RNA 2878 [Source:HGNC Symbol;Acc:HGNC:54524]	no	no	no	no
ENSG00000181381	50	100	4	DDX60L	168356735	168537786	DExD/H-box 60 like [Source:HGNC Symbol;Acc:HGNC:26429]	no	no	no	no
ENSG00000181472	50	100	6	ZBTB2	151364115	151391559	zinc finger and BTB domain containing 2 [Source:HGNC Symbol;Acc:HGNC:20868]	no	no	no	no
ENSG00000182264	50	100	19	IZUMO1	48740852	48746909	izumo sperm-egg fusion 1 [Source:HGNC Symbol;Acc:HGNC:28539]	no	no	no	no
ENSG00000182378	50	100	X	PLCXD1	276322	303356	phosphatidylinositol specific phospholipase C X domain containing 1 [Source:HGNC Symbol;Acc:HGNC:23148]	PAR1	no	no	no
ENSG00000182752	50	100	9	PAPPA	116153791	116402321	pappalysin 1 [Source:HGNC Symbol;Acc:HGNC:8602]	no	no	no	no
ENSG00000182759	50	100	8	MAFA	143419182	143430732	MAF bZIP transcription factor A [Source:HGNC Symbol;Acc:HGNC:23145]	no	no	no	no
ENSG00000182795	50	100	1	C1orf116	207018522	207032756	chromosome 1 open reading frame 116 [Source:HGNC Symbol;Acc:HGNC:28667]	no	no	no	no
ENSG00000183091	50	100	2	NEB	151485336	151734487	nebulin [Source:HGNC Symbol;Acc:HGNC:7720]	no	no	no	no
ENSG00000183092	50	100	14	BEGAIN	100537147	100587417	brain enriched guanylate kinase associated [Source:HGNC Symbol;Acc:HGNC:24163]	no	no	no	no
ENSG00000183458	50	100	16	PKD1P3	14911551	14935708	polycystin 1, transient receptor potential channel interacting pseudogene 3 [Source:HGNC Symbol;Acc:HGNC:30067]	no	no	no	no
ENSG00000183615	50	100	1	FAM167B	32247222	32248856	family with sequence similarity 167 member B [Source:HGNC Symbol;Acc:HGNC:28133]	no	no	no	no
ENSG00000183666	50	100	5	GUSBP1	21459560	21501826	GUSB pseudogene 1 [Source:HGNC Symbol;Acc:HGNC:13670]	no	no	no	no
ENSG00000183878	50	100	Y	UTY	13234577	13480673	ubiquitously transcribed tetratricopeptide repeat containing, Y-linked [Source:HGNC Symbol;Acc:HGNC:12638]	no	no	no	no
ENSG00000183889	50	100	16	ENSG00000183889	16317444	16350590	nuclear pore complex interacting protein family, member A9 [Source:NCBI gene (formerly Entrezgene);Acc:105376752]	no	no	no	no
ENSG00000184163	50	100	1	C1QTNF12	1242446	1246722	C1q and TNF related 12 [Source:HGNC Symbol;Acc:HGNC:32308]	no	no	no	no
ENSG00000184227	50	100	14	ACOT1	73537143	73543796	acyl-CoA thioesterase 1 [Source:HGNC Symbol;Acc:HGNC:33128]	no	no	no	no
ENSG00000184465	50	100	6	WDR27	169457212	169702067	WD repeat domain 27 [Source:HGNC Symbol;Acc:HGNC:21248]	no	no	no	no
ENSG00000185010	50	100	X	F8	154835788	155026940	coagulation factor VIII [Source:HGNC Symbol;Acc:HGNC:3546]	no	no	no	yes
ENSG00000185052	50	100	20	SLC24A3	19212642	19722926	solute carrier family 24 member 3 [Source:HGNC Symbol;Acc:HGNC:10977]	no	no	no	no
ENSG00000185215	50	100	14	TNFAIP2	103121476	103137439	TNF alpha induced protein 2 [Source:HGNC Symbol;Acc:HGNC:11895]	no	no	no	no
ENSG00000185278	50	100	1	ZBTB37	173868082	173903547	zinc finger and BTB domain containing 37 [Source:HGNC Symbol;Acc:HGNC:28365]	no	no	no	no
ENSG00000185291	50	100	X	IL3RA	1336616	1382689	interleukin 3 receptor subunit alpha [Source:HGNC Symbol;Acc:HGNC:6012]	PAR1	no	no	no
ENSG00000185404	50	100	2	SP140L	230327184	230403732	SP140 nuclear body protein like [Source:HGNC Symbol;Acc:HGNC:25105]	no	no	no	no
ENSG00000185495	50	100	1	SEPTIN7P13	223995895	224003654	septin 7 pseudogene 13 [Source:HGNC Symbol;Acc:HGNC:55092]	no	no	no	no
ENSG00000185513	50	100	20	L3MBTL1	43489442	43550954	L3MBTL histone methyl-lysine binding protein 1 [Source:HGNC Symbol;Acc:HGNC:15905]	no	no	no	no
ENSG00000185745	50	100	10	IFIT1	89392546	89406487	interferon induced protein with tetratricopeptide repeats 1 [Source:HGNC Symbol;Acc:HGNC:5407]	no	no	no	no
ENSG00000185864	50	100	16	NPIPB4	21834569	21880827	nuclear pore complex interacting protein family member B4 [Source:HGNC Symbol;Acc:HGNC:41985]	no	no	no	no
ENSG00000186141	50	100	1	POLR3C	145824053	145844402	RNA polymerase III subunit C [Source:HGNC Symbol;Acc:HGNC:30076]	no	no	no	no
ENSG00000186439	50	100	6	TRDN	123216339	123637093	triadin [Source:HGNC Symbol;Acc:HGNC:12261]	no	no	no	no
ENSG00000186994	50	100	19	KANK3	8322584	8343262	KN motif and ankyrin repeat domains 3 [Source:HGNC Symbol;Acc:HGNC:24796]	no	no	no	no
ENSG00000187105	50	100	14	HEATR4	73478484	73558947	HEAT repeat containing 4 [Source:HGNC Symbol;Acc:HGNC:16761]	no	no	no	no
ENSG00000187122	50	100	10	SLIT1	96998038	97185959	slit guidance ligand 1 [Source:HGNC Symbol;Acc:HGNC:11085]	no	no	no	no
ENSG00000187187	50	100	19	ZNF546	39984134	40021038	zinc finger protein 546 [Source:HGNC Symbol;Acc:HGNC:28671]	no	no	no	no
ENSG00000187554	50	100	1	TLR5	223109404	223143248	toll like receptor 5 [Source:HGNC Symbol;Acc:HGNC:11851]	no	no	no	no
ENSG00000187699	50	100	2	C2orf88	189879609	190203484	chromosome 2 open reading frame 88 [Source:HGNC Symbol;Acc:HGNC:28191]	no	no	no	no
ENSG00000187800	50	100	1	PEAR1	156893698	156916429	platelet endothelial aggregation receptor 1 [Source:HGNC Symbol;Acc:HGNC:33631]	no	no	no	no
ENSG00000187957	50	100	2	DNER	229357629	229714555	delta/notch like EGF repeat containing [Source:HGNC Symbol;Acc:HGNC:24456]	no	no	no	no
ENSG00000188211	50	100	11	NCR3LG1	17351800	17377341	natural killer cell cytotoxicity receptor 3 ligand 1 [Source:HGNC Symbol;Acc:HGNC:42400]	no	no	no	no
ENSG00000188219	50	100	2	POTEE	131209536	131265278	POTE ankyrin domain family member E [Source:HGNC Symbol;Acc:HGNC:33895]	no	no	no	no
ENSG00000188487	50	100	11	INSC	15112424	15247208	INSC spindle orientation adaptor protein [Source:HGNC Symbol;Acc:HGNC:33116]	no	no	no	no
ENSG00000188738	50	100	2	FSIP2	185738804	185833290	fibrous sheath interacting protein 2 [Source:HGNC Symbol;Acc:HGNC:21675]	no	no	no	no
ENSG00000188801	50	100	9	ZNF322P1	97198303	97199511	zinc finger protein 322 pseudogene 1 [Source:HGNC Symbol;Acc:HGNC:14003]	no	no	no	no
ENSG00000188933	50	100	17	USP32P1	16796043	16802427	ubiquitin specific peptidase 32 pseudogene 1 [Source:HGNC Symbol;Acc:HGNC:43570]	no	no	no	no
ENSG00000189190	50	100	19	ZNF600	52749942	52786807	zinc finger protein 600 [Source:HGNC Symbol;Acc:HGNC:30951]	no	no	no	no
ENSG00000189409	50	100	1	MMP23B	1632163	1635263	matrix metallopeptidase 23B [Source:HGNC Symbol;Acc:HGNC:7171]	no	no	no	no
ENSG00000189423	50	100	17	USP32P3	20424589	20431008	ubiquitin specific peptidase 32 pseudogene 3 [Source:HGNC Symbol;Acc:HGNC:43576]	no	no	no	no
ENSG00000196132	50	100	20	MYT1	64102394	64242253	myelin transcription factor 1 [Source:HGNC Symbol;Acc:HGNC:7622]	no	no	no	no
ENSG00000196159	50	100	4	FAT4	125314918	125492932	FAT atypical cadherin 4 [Source:HGNC Symbol;Acc:HGNC:23109]	no	no	no	no
ENSG00000196361	50	100	19	ELAVL3	11451326	11481046	ELAV like RNA binding protein 3 [Source:HGNC Symbol;Acc:HGNC:3314]	no	no	no	no
ENSG00000196604	50	100	2	POTEF	130073535	130129222	POTE ankyrin domain family member F [Source:HGNC Symbol;Acc:HGNC:33905]	no	no	no	no
ENSG00000196655	50	100	11	TRAPPC4	119018763	119025454	trafficking protein particle complex subunit 4 [Source:HGNC Symbol;Acc:HGNC:19943]	no	no	no	no
ENSG00000196659	50	100	2	TTC30B	177548998	177552796	tetratricopeptide repeat domain 30B [Source:HGNC Symbol;Acc:HGNC:26425]	no	no	no	no
ENSG00000196756	50	100	20	SNHG17	38419638	38435409	small nucleolar RNA host gene 17 [Source:HGNC Symbol;Acc:HGNC:48600]	no	no	no	no
ENSG00000196810	50	100	4	CTBP1-DT	1249300	1288291	CTBP1 divergent transcript [Source:HGNC Symbol;Acc:HGNC:28307]	no	no	no	no
ENSG00000196912	50	100	2	ANKRD36B	97492663	97589877	ankyrin repeat domain 36B [Source:HGNC Symbol;Acc:HGNC:29333]	no	no	no	no
ENSG00000196922	50	100	8	ZNF252P	144976190	144999723	zinc finger protein 252, pseudogene [Source:HGNC Symbol;Acc:HGNC:13046]	no	no	no	no
ENSG00000197168	50	100	13	NEK5	52033611	52129092	NIMA related kinase 5 [Source:HGNC Symbol;Acc:HGNC:7748]	no	no	no	no
ENSG00000197291	50	100	17	RAMP2-AS1	42753914	42761257	RAMP2 antisense RNA 1 [Source:HGNC Symbol;Acc:HGNC:44358]	no	no	no	no
ENSG00000197375	50	100	5	SLC22A5	132369710	132395613	solute carrier family 22 member 5 [Source:HGNC Symbol;Acc:HGNC:10969]	no	no	no	no
ENSG00000197410	50	100	4	DCHS2	154231742	154491799	dachsous cadherin-related 2 [Source:HGNC Symbol;Acc:HGNC:23111]	no	no	no	no
ENSG00000197557	50	100	2	TTC30A	177612999	177618742	tetratricopeptide repeat domain 30A [Source:HGNC Symbol;Acc:HGNC:25853]	no	no	no	no
ENSG00000197558	50	100	7	SSPOP	149776042	149833979	SCO-spondin, pseudogene [Source:HGNC Symbol;Acc:HGNC:21998]	no	no	no	no
ENSG00000197705	50	100	18	KLHL14	32672673	32773023	kelch like family member 14 [Source:HGNC Symbol;Acc:HGNC:29266]	no	no	no	no
ENSG00000197714	50	100	19	ZNF460	57280051	57294069	zinc finger protein 460 [Source:HGNC Symbol;Acc:HGNC:21628]	no	no	no	no
ENSG00000197961	50	100	19	ZNF121	9560329	9584504	zinc finger protein 121 [Source:HGNC Symbol;Acc:HGNC:12904]	no	no	no	no
ENSG00000197978	50	100	15	GOLGA6L9	82429816	82439153	golgin A6 family like 9 [Source:HGNC Symbol;Acc:HGNC:37229]	no	no	no	no
ENSG00000198223	50	100	X	CSF2RA	1268800	1310381	colony stimulating factor 2 receptor subunit alpha [Source:HGNC Symbol;Acc:HGNC:2435]	PAR1	no	no	no
ENSG00000198590	50	100	3	APRG1	37381062	37440186	APRG1 tumor suppressor candidate [Source:HGNC Symbol;Acc:HGNC:24082]	no	no	no	no
ENSG00000198633	50	100	19	ZNF534	52429148	52452315	zinc finger protein 534 [Source:HGNC Symbol;Acc:HGNC:26337]	no	no	no	no
ENSG00000198732	50	100	14	SMOC1	69854131	70032366	SPARC related modular calcium binding 1 [Source:HGNC Symbol;Acc:HGNC:20318]	no	no	no	no
ENSG00000198797	50	100	1	BRINP2	177170958	177282422	BMP/retinoic acid inducible neural specific 2 [Source:HGNC Symbol;Acc:HGNC:13746]	no	no	no	no
ENSG00000198822	50	100	7	GRM3	86643909	86864879	glutamate metabotropic receptor 3 [Source:HGNC Symbol;Acc:HGNC:4595]	no	no	no	no
ENSG00000198846	50	100	8	TOX	58805412	59119147	thymocyte selection associated high mobility group box [Source:HGNC Symbol;Acc:HGNC:18988]	no	no	no	no
ENSG00000198857	50	100	1	HSD3BP5	119601340	119609250	hydroxy-delta-5-steroid dehydrogenase, 3 beta, pseudogene 5 [Source:HGNC Symbol;Acc:HGNC:5223]	no	no	no	no
ENSG00000198885	50	100	2	ITPRIPL1	96325317	96330517	ITPRIP like 1 [Source:HGNC Symbol;Acc:HGNC:29371]	no	no	no	no
ENSG00000203392	50	100	15	ENSG00000203392	75678548	75680752	novel transcript, antisense to CSPG4	no	no	no	no
ENSG00000203930	50	100	X	LINC00632	140709562	140793215	long intergenic non-protein coding RNA 632 [Source:HGNC Symbol;Acc:HGNC:27865]	no	no	no	no
ENSG00000204065	50	100	X	TCEAL5	103273691	103276750	transcription elongation factor A like 5 [Source:HGNC Symbol;Acc:HGNC:22282]	no	no	no	no
ENSG00000204131	50	100	X	NHSL2	71910845	72161750	NHS like 2 [Source:HGNC Symbol;Acc:HGNC:33737]	no	no	yes	no
ENSG00000204172	50	100	10	AGAP9	47501854	47523638	ArfGAP with GTPase domain, ankyrin repeat and PH domain 9 [Source:HGNC Symbol;Acc:HGNC:23463]	no	no	no	no
ENSG00000204305	50	100	6	AGER	32180968	32184322	advanced glycosylation end-product specific receptor [Source:HGNC Symbol;Acc:HGNC:320]	no	no	no	no
ENSG00000204410	50	100	6	MSH5	31739677	31762676	mutS homolog 5 [Source:HGNC Symbol;Acc:HGNC:7328]	no	no	no	no
ENSG00000204520	50	100	6	MICA	31399784	31415315	MHC class I polypeptide-related sequence A [Source:HGNC Symbol;Acc:HGNC:7090]	no	no	no	no
ENSG00000204525	50	100	6	HLA-C	31268749	31272130	major histocompatibility complex, class I, C [Source:HGNC Symbol;Acc:HGNC:4933]	no	no	no	no
ENSG00000204644	50	100	6	ZFP57	29672483	29681155	ZFP57 zinc finger protein [Source:HGNC Symbol;Acc:HGNC:18791]	no	no	no	no
ENSG00000204677	50	100	5	FAM153CP	178006348	178086529	family with sequence similarity 153 member C, pseudogene [Source:HGNC Symbol;Acc:HGNC:33936]	no	no	no	no
ENSG00000204860	50	100	9	FAM201A	38620474	38624990	family with sequence similarity 201 member A [Source:HGNC Symbol;Acc:HGNC:27239]	no	no	no	no
ENSG00000204961	50	100	5	PCDHA9	140847772	141012347	protocadherin alpha 9 [Source:HGNC Symbol;Acc:HGNC:8675]	no	no	no	no
ENSG00000204965	50	100	5	PCDHA5	140821604	141012347	protocadherin alpha 5 [Source:HGNC Symbol;Acc:HGNC:8671]	no	no	no	no
ENSG00000205041	50	100	19	ENSG00000205041	40273489	40275479	novel transcript, sense intronic to AKT2	no	no	no	no
ENSG00000205277	50	100	7	MUC12	100969565	101018939	mucin 12, cell surface associated [Source:HGNC Symbol;Acc:HGNC:7510]	no	no	no	no
ENSG00000205959	50	100	4	ENSG00000205959	8482270	8516759	novel transcript	no	no	no	no
ENSG00000210107	50	100	MT	MT-TQ	4329	4400	mitochondrially encoded tRNA-Gln (CAA/G) [Source:HGNC Symbol;Acc:HGNC:7495]	no	no	no	no
ENSG00000210195	50	100	MT	MT-TT	15888	15953	mitochondrially encoded tRNA-Thr (ACN) [Source:HGNC Symbol;Acc:HGNC:7499]	no	no	no	no
ENSG00000212807	50	100	7	OR2A42	144228244	144239605	olfactory receptor family 2 subfamily A member 42 [Source:HGNC Symbol;Acc:HGNC:31230]	no	no	no	no
ENSG00000212993	50	100	8	POU5F1B	127322183	127420066	POU class 5 homeobox 1B [Source:HGNC Symbol;Acc:HGNC:9223]	no	no	no	no
ENSG00000213047	50	100	1	DENND1B	197504748	197775696	DENN domain containing 1B [Source:HGNC Symbol;Acc:HGNC:28404]	no	no	no	no
ENSG00000213139	50	100	3	CRYGS	186538441	186546702	crystallin gamma S [Source:HGNC Symbol;Acc:HGNC:2417]	no	no	no	no
ENSG00000213214	50	100	7	ARHGEF35	144186083	144195879	Rho guanine nucleotide exchange factor 35 [Source:HGNC Symbol;Acc:HGNC:33846]	no	no	no	no
ENSG00000213888	50	100	22	LINC01521	31346777	31348719	long intergenic non-protein coding RNA 1521 [Source:HGNC Symbol;Acc:HGNC:26029]	no	no	no	no
ENSG00000214132	50	100	5	ENSG00000214132	20304045	20305448	nucleoporin 50kDa (NUP50) pseudogene	no	no	no	no
ENSG00000214279	50	100	10	SCART1	133453928	133523558	scavenger receptor family member expressed on T cells 1 [Source:HGNC Symbol;Acc:HGNC:32411]	no	no	no	no
ENSG00000214455	50	100	13	RCN1P2	45390353	45391267	reticulocalbin 1 pseudogene 2 [Source:HGNC Symbol;Acc:HGNC:39204]	no	no	no	no
ENSG00000214688	50	100	10	C10orf105	71711701	71737824	chromosome 10 open reading frame 105 [Source:HGNC Symbol;Acc:HGNC:20304]	no	no	no	no
ENSG00000214837	50	100	1	LINC01347	243087710	243097299	long intergenic non-protein coding RNA 1347 [Source:HGNC Symbol;Acc:HGNC:50566]	no	no	no	no
ENSG00000214944	50	100	5	ARHGEF28	73626158	73941993	Rho guanine nucleotide exchange factor 28 [Source:HGNC Symbol;Acc:HGNC:30322]	no	no	no	no
ENSG00000215045	50	100	7	GRID2IP	6496778	6551461	Grid2 interacting protein [Source:HGNC Symbol;Acc:HGNC:18464]	no	no	no	no
ENSG00000215156	50	100	5	ENSG00000215156	34190056	34193653	POM121-like protein 1 pseudogene	no	no	no	no
ENSG00000215158	50	100	5	GUSBP18	34175822	34218343	GUSB pseudogene 18 [Source:HGNC Symbol;Acc:HGNC:55770]	no	no	no	no
ENSG00000215580	50	100	Y	BCORP1	19456585	19484884	BCL6 corepressor pseudogene 1 [Source:HGNC Symbol;Acc:HGNC:23953]	no	no	no	no
ENSG00000215859	50	100	1	PDZK1P1	147994301	148009592	PDZ domain containing 1 pseudogene 1 [Source:HGNC Symbol;Acc:HGNC:31974]	no	no	no	no
ENSG00000215908	50	100	1	CROCCP2	16618969	16657232	CROCC pseudogene 2 [Source:HGNC Symbol;Acc:HGNC:28170]	no	no	no	no
ENSG00000220583	50	100	6	RPL35P2	34263311	34263673	ribosomal protein L35 pseudogene 2 [Source:HGNC Symbol;Acc:HGNC:35789]	no	no	no	no
ENSG00000221970	50	100	7	OR2A1	144312419	144322737	olfactory receptor family 2 subfamily A member 1 [Source:HGNC Symbol;Acc:HGNC:8229]	no	no	no	no
ENSG00000223509	50	100	15	WHAMMP1	32519848	32536926	WHAMM pseudogene 1 [Source:HGNC Symbol;Acc:HGNC:32361]	no	no	no	no
ENSG00000223572	50	100	15	CKMT1A	43692886	43699222	creatine kinase, mitochondrial 1A [Source:HGNC Symbol;Acc:HGNC:31736]	no	no	no	no
ENSG00000223751	50	100	2	ENSG00000223751	740885	749423	novel transcript	no	no	no	no
ENSG00000223760	50	100	2	MED15P9	130135978	130137759	mediator complex subunit 15 pseudogene 9 [Source:HGNC Symbol;Acc:HGNC:44130]	no	no	no	no
ENSG00000223773	50	100	X	CD99P1	2609415	2623453	CD99 molecule pseudogene 1 [Source:HGNC Symbol;Acc:HGNC:7083]	PAR1	no	no	no
ENSG00000224699	50	100	1	LAMTOR5-AS1	110347116	110443817	LAMTOR5 antisense RNA 1 [Source:HGNC Symbol;Acc:HGNC:40823]	no	no	no	no
ENSG00000224717	50	100	1	LEMD1-DT	205455929	205469024	LEMD1 divergent transcript [Source:HGNC Symbol;Acc:HGNC:27631]	no	no	no	no
ENSG00000225125	50	100	X	RANP4	136807223	136807877	RAN pseudogene 4 [Source:HGNC Symbol;Acc:HGNC:39859]	no	no	no	no
ENSG00000225366	50	100	X	TDGF1P3	110520896	110523021	teratocarcinoma-derived growth factor 1 pseudogene 3 [Source:HGNC Symbol;Acc:HGNC:11703]	no	no	no	no
ENSG00000225420	50	100	2	ENSG00000225420	88538720	88575610	novel transcript	no	no	no	no
ENSG00000225470	50	100	X	JPX	73944182	74070408	JPX transcript, XIST activator [Source:HGNC Symbol;Acc:HGNC:37191]	no	yes	no	no
ENSG00000225828	50	100	1	FAM229A	32361270	32364278	family with sequence similarity 229 member A [Source:HGNC Symbol;Acc:HGNC:44652]	no	no	no	no
ENSG00000225855	50	100	1	RUSC1-AS1	155316863	155324176	RUSC1 antisense RNA 1 [Source:HGNC Symbol;Acc:HGNC:26680]	no	no	no	no
ENSG00000225912	50	100	X	RPL26P36	92676519	92676954	ribosomal protein L26 pseudogene 36 [Source:HGNC Symbol;Acc:HGNC:36685]	no	no	no	no
ENSG00000226239	50	100	20	ENSG00000226239	32005671	32031591	novel transcript	no	no	no	no
ENSG00000226318	50	100	10	RPS3AP38	67960702	67961464	RPS3A pseudogene 38 [Source:HGNC Symbol;Acc:HGNC:36145]	no	no	no	no
ENSG00000226383	50	100	2	LINC01876	156011530	156254950	long intergenic non-protein coding RNA 1876 [Source:HGNC Symbol;Acc:HGNC:52695]	no	no	no	no
ENSG00000226549	50	100	17	SCDP1	20784645	20785725	stearoyl-CoA desaturase pseudogene 1 [Source:HGNC Symbol;Acc:HGNC:10572]	no	no	no	no
ENSG00000226744	50	100	7	ENSG00000226744	97870167	97870289	pseudogene similar to asparagine synthetase ASNS	no	no	no	no
ENSG00000226792	50	100	13	C13orf42	51082119	51200252	chromosome 13 open reading frame 42 [Source:HGNC Symbol;Acc:HGNC:42693]	no	no	no	no
ENSG00000226824	50	100	7	ENSG00000226824	66654513	66685692	novel transcript	no	no	no	no
ENSG00000226856	50	100	2	THORLNC	118132128	118222250	testis associated oncogenic lncRNA [Source:HGNC Symbol;Acc:HGNC:53788]	no	no	no	no
ENSG00000226942	50	100	16	IL9RP3	29336	38321	interleukin 9 receptor pseudogene 3 [Source:HGNC Symbol;Acc:HGNC:6033]	no	no	no	no
ENSG00000227232	50	100	1	WASH7P	14404	29570	WASP family homolog 7, pseudogene [Source:HGNC Symbol;Acc:HGNC:38034]	no	no	no	no
ENSG00000227392	50	100	19	HPN-AS1	35042902	35106307	HPN antisense RNA 1 [Source:HGNC Symbol;Acc:HGNC:47041]	no	no	no	no
ENSG00000227543	50	100	17	SPAG5-AS1	28598790	28617377	SPAG5 antisense RNA 1 [Source:HGNC Symbol;Acc:HGNC:41140]	no	no	no	no
ENSG00000227719	50	100	7	ENSG00000227719	8114025	8116561	novel transcript	no	no	no	no
ENSG00000227825	50	100	12	SLC9A7P1	98453835	98457145	solute carrier family 9 member 7 pseudogene 1 [Source:HGNC Symbol;Acc:HGNC:32679]	no	no	no	no
ENSG00000228252	50	100	3	COL6A4P2	130212823	130273806	collagen type VI alpha 4 pseudogene 2 [Source:HGNC Symbol;Acc:HGNC:38501]	no	no	no	no
ENSG00000228526	50	100	1	MIR34AHG	9148011	9198906	MIR34A host gene [Source:HGNC Symbol;Acc:HGNC:51913]	no	no	no	no
ENSG00000228623	50	100	9	ZNF883	112988129	113012192	zinc finger protein 883 [Source:HGNC Symbol;Acc:HGNC:27271]	no	no	no	no
ENSG00000228624	50	100	6	HDAC2-AS2	113969701	114471705	HDAC2 and HS3ST5 antisense RNA 2 [Source:HGNC Symbol;Acc:HGNC:43590]	no	no	no	no
ENSG00000228960	50	100	7	OR2A9P	144299373	144300305	olfactory receptor family 2 subfamily A member 9 pseudogene [Source:HGNC Symbol;Acc:HGNC:8236]	no	no	no	no
ENSG00000229754	50	100	2	CXCR2P1	218060339	218061412	C-X-C motif chemokine receptor 2 pseudogene 1 [Source:HGNC Symbol;Acc:HGNC:6028]	no	no	no	no
ENSG00000229891	50	100	22	LINC01315	42364387	42369290	long intergenic non-protein coding RNA 1315 [Source:HGNC Symbol;Acc:HGNC:50513]	no	no	no	no
ENSG00000229955	50	100	22	ENSG00000229955	38387918	38388857	novel transcript, sense intronic to CSNK1E	no	no	no	no
ENSG00000230002	50	100	2	ALMS1-IT1	73456764	73459482	ALMS1 intronic transcript 1 [Source:HGNC Symbol;Acc:HGNC:41305]	no	no	no	no
ENSG00000230006	50	100	2	ANKRD36BP2	88782712	88805403	ankyrin repeat domain 36B pseudogene 2 [Source:HGNC Symbol;Acc:HGNC:33607]	no	no	no	no
ENSG00000230076	50	100	2	RPL10P6	214847128	214847445	ribosomal protein L10 pseudogene 6 [Source:HGNC Symbol;Acc:HGNC:52343]	no	no	no	no
ENSG00000230084	50	100	3	ZBTB47-AS1	42601961	42654388	ZBTB47 and NKTR antisense RNA 1 [Source:HGNC Symbol;Acc:HGNC:41174]	no	no	no	no
ENSG00000230131	50	100	10	LINC02641	123356450	123537767	long intergenic non-protein coding RNA 2641 [Source:HGNC Symbol;Acc:HGNC:54125]	no	no	no	no
ENSG00000230313	50	100	6	HCG24	33144783	33147767	HLA complex group 24 [Source:HGNC Symbol;Acc:HGNC:23500]	no	no	no	no
ENSG00000230432	50	100	2	ENSG00000230432	219299002	219304130	novel transcript	no	no	no	no
ENSG00000230438	50	100	6	SERPINB9P1	2851230	2881407	serpin family B member 9 pseudogene 1 [Source:HGNC Symbol;Acc:HGNC:28590]	no	no	no	no
ENSG00000230715	50	100	7	ENSG00000230715	128652841	128653243	novel pseudogene	no	no	no	no
ENSG00000230724	50	100	11	LINC01001	127204	139612	long intergenic non-protein coding RNA 1001 [Source:HGNC Symbol;Acc:HGNC:38540]	no	no	no	no
ENSG00000230922	50	100	22	ENSG00000230922	45000565	45003619	novel transcript	no	no	no	no
ENSG00000231240	50	100	2	KLF2P1	130036958	130038422	Kruppel like factor 2 pseudogene 1 [Source:HGNC Symbol;Acc:HGNC:49280]	no	no	no	no
ENSG00000231365	50	100	1	WARS2-AS1	119140391	119275973	WARS2 antisense RNA 1 [Source:HGNC Symbol;Acc:HGNC:40612]	no	no	no	no
ENSG00000231443	50	100	3	ENSG00000231443	195937243	195938739	protein phosphatase 4, regulatory subunit 2 (PPP4R2) pseudogene	no	no	no	no
ENSG00000231587	50	100	9	SNORD62B	131490486	131490571	small nucleolar RNA, C/D box 62B [Source:HGNC Symbol;Acc:HGNC:23031]	no	no	no	no
ENSG00000231742	50	100	20	LINC01273	50171809	50176676	long intergenic non-protein coding RNA 1273 [Source:HGNC Symbol;Acc:HGNC:50329]	no	no	no	no
ENSG00000231752	50	100	1	EMBP1	121519345	121568791	embigin pseudogene 1 [Source:HGNC Symbol;Acc:HGNC:38661]	no	no	no	no
ENSG00000232573	50	100	14	RPL3P4	98972879	98973301	ribosomal protein L3 pseudogene 4 [Source:HGNC Symbol;Acc:HGNC:19805]	no	no	no	no
ENSG00000232593	50	100	X	KANTR	53094142	53170914	KANTR integral membrane protein [Source:HGNC Symbol;Acc:HGNC:49510]	no	no	no	yes
ENSG00000232611	50	100	X	ENSG00000232611	136840931	136847797	novel transcript	no	no	no	no
ENSG00000232712	50	100	20	KIZ-AS1	21154023	21218289	KIZ antisense RNA 1 [Source:HGNC Symbol;Acc:HGNC:51231]	no	no	no	no
ENSG00000232859	50	100	17	LYRM9	27878314	27894752	LYR motif containing 9 [Source:HGNC Symbol;Acc:HGNC:27314]	no	no	no	no
ENSG00000232871	50	100	19	SEC1P	48638071	48682245	secretory blood group 1, pseudogene [Source:HGNC Symbol;Acc:HGNC:44149]	no	no	no	no
ENSG00000233006	50	100	5	MIR3936HG	132311285	132370170	MIR3936 host gene [Source:HGNC Symbol;Acc:HGNC:40538]	no	no	no	no
ENSG00000233237	50	100	6	LINC00472	71343427	71420745	long intergenic non-protein coding RNA 472 [Source:HGNC Symbol;Acc:HGNC:21380]	no	no	no	no
ENSG00000233913	50	100	5	RPL10P9	168616352	168616996	ribosomal protein L10 pseudogene 9 [Source:HGNC Symbol;Acc:HGNC:35579]	no	no	no	no
ENSG00000233967	50	100	6	ENSG00000233967	80441295	80466674	novel transcript	no	no	no	no
ENSG00000233974	50	100	5	ENSG00000233974	21481327	21484011	POM121 membrane glycoprotein (POM121) pseudogene	no	no	no	no
ENSG00000234418	50	100	7	ENSG00000234418	122144405	122225246	novel transcript	no	no	no	no
ENSG00000234678	50	100	1	ELF3-AS1	201995696	202010463	ELF3 antisense RNA 1 [Source:HGNC Symbol;Acc:HGNC:40211]	no	no	no	no
ENSG00000234684	50	100	20	SDCBP2-AS1	1325400	1378735	SDCBP2 antisense RNA 1 [Source:HGNC Symbol;Acc:HGNC:44314]	no	no	no	no
ENSG00000234745	50	100	6	HLA-B	31353872	31367067	major histocompatibility complex, class I, B [Source:HGNC Symbol;Acc:HGNC:4932]	no	no	no	no
ENSG00000234825	50	100	X	XRCC6P2	150231075	150232896	X-ray repair cross complementing 6 pseudogene 2 [Source:HGNC Symbol;Acc:HGNC:45184]	no	no	no	no
ENSG00000234851	50	100	3	RPL23AP42	161429127	161429597	ribosomal protein L23a pseudogene 42 [Source:HGNC Symbol;Acc:HGNC:35942]	no	no	no	no
ENSG00000234911	50	100	14	TEX21P	64341673	64387986	testis expressed 21, pseudogene [Source:HGNC Symbol;Acc:HGNC:35455]	no	no	no	no
ENSG00000235245	50	100
ENSG00000235652	50	100	6	EPM2A-DT	145799409	145887430	EPM2A divergent transcript [Source:HGNC Symbol;Acc:HGNC:48990]	no	no	no	no
ENSG00000235703	50	100	X	EOLA2-DT	149938613	150224580	EOLA2 divergent transcript [Source:HGNC Symbol;Acc:HGNC:48579]	no	no	no	yes
ENSG00000236017	50	100	X	ASMTL-AS1	1401769	1414028	ASMTL antisense RNA 1 [Source:HGNC Symbol;Acc:HGNC:25811]	PAR1	no	no	no
ENSG00000236255	50	100	2	ENSG00000236255	117833937	117841658	novel transcript	no	no	no	no
ENSG00000236333	50	100	12	TRHDE-AS1	72249964	72276954	TRHDE antisense RNA 1 [Source:HGNC Symbol;Acc:HGNC:27471]	no	no	no	no
ENSG00000236372	50	100	1	ENSG00000236372	232174932	232180113	novel transcript	no	no	no	no
ENSG00000236438	50	100	3	FAM157A	198180755	198190365	family with sequence similarity 157 member A [Source:HGNC Symbol;Acc:HGNC:34079]	no	no	no	no
ENSG00000236871	50	100	X	LINC00106	1396427	1399402	long intergenic non-protein coding RNA 106 [Source:HGNC Symbol;Acc:HGNC:31843]	PAR1	no	no	no
ENSG00000236969	50	100	2	GGT8P	91775944	91781169	gamma-glutamyltransferase 8 pseudogene [Source:HGNC Symbol;Acc:HGNC:33438]	no	no	no	no
ENSG00000237594	50	100	21	TIAM1-AS1	31559245	31560487	TIAM1 antisense RNA 1 [Source:HGNC Symbol;Acc:HGNC:54361]	no	no	no	no
ENSG00000237753	50	100	2	SLC20A1-DT	112641832	112645720	SLC20A1 divergent transcript [Source:HGNC Symbol;Acc:HGNC:55651]	no	no	no	no
ENSG00000237872	50	100	1	POU5F1P4	155433178	155434262	POU class 5 homeobox 1 pseudogene 4 [Source:HGNC Symbol;Acc:HGNC:33310]	no	no	no	no
ENSG00000237940	50	100	2	LINC01238	241970683	241977276	long intergenic non-protein coding RNA 1238 [Source:HGNC Symbol;Acc:HGNC:49795]	no	no	no	no
ENSG00000237973	50	100	1	MTCO1P12	631074	632616	MT-CO1 pseudogene 12 [Source:HGNC Symbol;Acc:HGNC:52014]	no	no	no	no
ENSG00000237976	50	100	1	RFX5-AS1	151346938	151348027	RFX5 antisense RNA 1 [Source:HGNC Symbol;Acc:HGNC:40503]	no	no	no	no
ENSG00000238178	50	100	X	ENSG00000238178	16152941	16170869	novel transcript, antisense to MAGEB17	no	no	no	no
ENSG00000238197	50	100	21	PAXBP1-AS1	32728094	32747065	PAXBP1 antisense RNA 1 [Source:HGNC Symbol;Acc:HGNC:39603]	no	no	no	no
ENSG00000239218	50	100	8	RPS20P22	38434347	38435664	ribosomal protein S20 pseudogene 22 [Source:HGNC Symbol;Acc:HGNC:36379]	no	no	no	no
ENSG00000239653	50	100	3	PSMD6-AS2	64004022	64012148	PSMD6 antisense RNA 2 [Source:HGNC Symbol;Acc:HGNC:44125]	no	no	no	no
ENSG00000239665	50	100
ENSG00000240036	50	100	11	ENSG00000240036	27581680	27582055	novel pseudogene	no	no	no	no
ENSG00000240086	50	100	3	ENSG00000240086	135138469	135439888	novel transcript, antisense to EPHB1	no	no	no	no
ENSG00000240972	50	100	22	MIF	23894383	23895227	macrophage migration inhibitory factor [Source:HGNC Symbol;Acc:HGNC:7097]	no	no	no	no
ENSG00000241163	50	100	3	LINC00877	71943592	72279503	long intergenic non-protein coding RNA 877 [Source:HGNC Symbol;Acc:HGNC:27706]	no	no	no	no
ENSG00000241336	50	100	3	LINC01487	155240919	155258766	long intergenic non-protein coding RNA 1487 [Source:HGNC Symbol;Acc:HGNC:51139]	no	no	no	no
ENSG00000241549	50	100	6	GUSBP2	26878572	26889198	GUSB pseudogene 2 [Source:HGNC Symbol;Acc:HGNC:18792]	no	no	no	no
ENSG00000241644	50	100	7	INMT	30697985	30757602	indolethylamine N-methyltransferase [Source:HGNC Symbol;Acc:HGNC:6069]	no	no	no	no
ENSG00000241743	50	100	X	XACT	113616300	114059289	X active specific transcript [Source:HGNC Symbol;Acc:HGNC:45056]	no	no	no	no
ENSG00000241859	50	100	Y	ANOS2P	13751656	13915824	anosmin 2, pseudogene [Source:HGNC Symbol;Acc:HGNC:6214]	no	no	no	no
ENSG00000242242	50	100	3	NECTIN3-AS1	110888384	111071553	NECTIN3 antisense RNA 1 [Source:HGNC Symbol;Acc:HGNC:40813]	no	no	no	no
ENSG00000242375	50	100	9	ENSG00000242375	97195351	97197687	novel transcript	no	no	no	no
ENSG00000242516	50	100	3	LINC00960	75672251	75742048	long intergenic non-protein coding RNA 960 [Source:HGNC Symbol;Acc:HGNC:48710]	no	no	no	no
ENSG00000242588	50	100	7	ENSG00000242588	128531707	128663479	novel transcript	no	no	no	no
ENSG00000242686	50	100	4	PDE6B-AS1	652850	656213	PDE6B antisense RNA 1 [Source:HGNC Symbol;Acc:HGNC:40438]	no	no	no	no
ENSG00000242759	50	100	3	LINC00882	106630469	107240671	long intergenic non-protein coding RNA 882 [Source:HGNC Symbol;Acc:HGNC:48568]	no	no	no	no
ENSG00000243660	50	100	10	ZNF487	43436841	43483181	zinc finger protein 487 [Source:HGNC Symbol;Acc:HGNC:23488]	no	no	no	no
ENSG00000243679	50	100	7	ENSG00000243679	128653969	128654722	novel pseudogene	no	no	no	no
ENSG00000243896	50	100	7	OR2A7	144257663	144264792	olfactory receptor family 2 subfamily A member 7 [Source:HGNC Symbol;Acc:HGNC:8234]	no	no	no	no
ENSG00000244055	50	100	7	ENSG00000244055	92457564	92495601	novel transcript, antisense to ERVW-1 and PEX1	no	no	no	no
ENSG00000244124	50	100	3	ATP1B3-AS1	141918252	141919021	ATP1B3 antisense RNA 1 [Source:HGNC Symbol;Acc:HGNC:40088]	no	no	no	no
ENSG00000244161	50	100	3	FLNB-AS1	58162547	58170636	FLNB antisense RNA 1 [Source:HGNC Symbol;Acc:HGNC:40239]	no	no	no	no
ENSG00000244198	50	100	7	ARHGEF35-AS1	144194858	144280547	ARHGEF35 antisense RNA 1 [Source:HGNC Symbol;Acc:HGNC:41292]	no	no	no	no
ENSG00000244479	50	100	7	OR2A1-AS1	144300395	144356181	OR2A1 antisense RNA 1 [Source:HGNC Symbol;Acc:HGNC:49168]	no	no	no	no
ENSG00000244627	50	100	22	TPTEP2	38361381	38384096	TPTE pseudogene 2 [Source:HGNC Symbol;Acc:HGNC:53828]	no	no	no	no
ENSG00000244694	50	100	6	PTCHD4	47856673	48111197	patched domain containing 4 [Source:HGNC Symbol;Acc:HGNC:21345]	no	no	no	no
ENSG00000244879	50	100	15	GABPB1-AS1	50354944	50372202	GABPB1 antisense RNA 1 [Source:HGNC Symbol;Acc:HGNC:44157]	no	no	no	no
ENSG00000245275	50	100	5	SAP30L-AS1	154325568	154445850	SAP30L antisense RNA 1 (head to head) [Source:HGNC Symbol;Acc:HGNC:26760]	no	no	no	no
ENSG00000246250	50	100	11	ENSG00000246250	43827517	43880726	novel transcript	no	no	no	no
ENSG00000246477	50	100	8	ENSG00000246477	11315859	11325429	novel transcript, antisense to MTMR9	no	no	no	no
ENSG00000248019	50	100	4	FAM13A-AS1	88709298	88730103	FAM13A antisense RNA 1 [Source:HGNC Symbol;Acc:HGNC:19370]	no	no	no	no
ENSG00000248367	50	100	5	ENSG00000248367	180292178	180295256	novel transcript	no	no	no	no
ENSG00000248587	50	100	5	GDNF-AS1	37811589	37953827	GDNF antisense RNA 1 [Source:HGNC Symbol;Acc:HGNC:43592]	no	no	no	no
ENSG00000248994	50	100	5	ENSG00000248994	1931064	2119926	novel transcript	no	no	no	no
ENSG00000249395	50	100	8	CASC9	75120409	75352327	cancer susceptibility 9 [Source:HGNC Symbol;Acc:HGNC:48906]	no	no	no	no
ENSG00000249406	50	100	17	ENSG00000249406	50199876	50215922	novel transcript	no	no	no	no
ENSG00000249550	50	100	12	LINC01234	113583886	113773726	long intergenic non-protein coding RNA 1234 [Source:HGNC Symbol;Acc:HGNC:49757]	no	no	no	no
ENSG00000249855	50	100	5	EEF1A1P19	43495073	43496454	eukaryotic translation elongation factor 1 alpha 1 pseudogene 19 [Source:HGNC Symbol;Acc:HGNC:37892]	no	no	no	no
ENSG00000250033	50	100	4	SLC7A11-AS1	138057464	138178177	SLC7A11 antisense RNA 1 [Source:HGNC Symbol;Acc:HGNC:44064]	no	no	no	no
ENSG00000250138	50	100	5	ENSG00000250138	69631963	69636399	POM121 membrane glycoprotein-like 1 (POM121L1) pseudogene	no	no	no	no
ENSG00000250241	50	100	4	PCDH10-DT	133075311	133149147	PCDH10 divergent transcript [Source:HGNC Symbol;Acc:HGNC:53036]	no	no	no	no
ENSG00000250251	50	100	16	PKD1P6	15125242	15154564	polycystin 1, transient receptor potential channel interacting pseudogene 6 [Source:HGNC Symbol;Acc:HGNC:30070]	no	no	no	no
ENSG00000250305	50	100	8	TRMT9B	12945642	13031503	tRNA methyltransferase 9B (putative) [Source:HGNC Symbol;Acc:HGNC:26725]	no	no	no	no
ENSG00000250309	50	100	5	MYOZ3-AS1	150670658	150672390	MYOZ3 antisense RNA 1 [Source:HGNC Symbol;Acc:HGNC:40846]	no	no	no	no
ENSG00000250337	50	100	5	PURPL	27217714	27497871	p53 upregulated regulator of p53 levels [Source:HGNC Symbol;Acc:HGNC:48995]	no	no	no	no
ENSG00000251095	50	100	4	ENSG00000251095	89410960	89726752	novel transcript	no	no	no	no
ENSG00000251188	50	100	4	ENSG00000251188	268982	269531	novel zinc finger protein pseudogene	no	no	no	no
ENSG00000251364	50	100	11	SYT9-AS1	7418826	7513665	SYT9 antisense RNA 1 [Source:HGNC Symbol;Acc:HGNC:56173]	no	no	no	no
ENSG00000253570	50	100	8	RNF5P1	38600661	38601200	ring finger protein 5 pseudogene 1 [Source:HGNC Symbol;Acc:HGNC:31053]	no	no	no	no
ENSG00000253731	50	100	5	PCDHGA6	141373891	141512975	protocadherin gamma subfamily A, 6 [Source:HGNC Symbol;Acc:HGNC:8704]	no	no	no	no
ENSG00000253854	50	100	8	ENSG00000253854	93719574	93721167	novel transcript	no	no	no	no
ENSG00000253931	50	100	8	LINC02990	143412749	143417054	long intergenic non-protein coding RNA 2990 [Source:HGNC Symbol;Acc:HGNC:56101]	no	no	no	no
ENSG00000253981	50	100	8	ALG1L13P	8238174	8241411	ALG1 like 13, pseudogene [Source:HGNC Symbol;Acc:HGNC:44382]	no	no	no	no
ENSG00000254206	50	100	16	NPIPB11	29381310	29406711	nuclear pore complex interacting protein family member B11 [Source:HGNC Symbol;Acc:HGNC:37453]	no	no	no	no
ENSG00000254595	50	100	11	ENSG00000254595	6488186	6489377	voltage-dependent anion channel 1(VDAC1) pseudogene	no	no	no	no
ENSG00000254936	50	100	8	ENSG00000254936	11123381	11126064	novel transcript	no	no	no	no
ENSG00000254995	50	100	20	STX16-NPEPL1	58651434	58715410	STX16-NPEPL1 readthrough (NMD candidate) [Source:HGNC Symbol;Acc:HGNC:41993]	no	no	no	no
ENSG00000255150	50	100	12	EID3	104303739	104305205	EP300 interacting inhibitor of differentiation 3 [Source:HGNC Symbol;Acc:HGNC:32961]	no	no	no	no
ENSG00000255192	50	100	15	NANOGP8	35083410	35085295	Nanog homeobox retrogene P8 [Source:HGNC Symbol;Acc:HGNC:23106]	no	no	no	no
ENSG00000255389	50	100	6	ENSG00000255389	111599875	111602295	chromosome 6 open reading frame 3	no	no	no	no
ENSG00000255455	50	100	11	ENSG00000255455	130866254	130870247	novel transcript	no	no	no	no
ENSG00000255545	50	100	11	B3GAT1-DT	134412284	134505665	B3GAT1 divergent transcript [Source:HGNC Symbol;Acc:HGNC:27449]	no	no	no	no
ENSG00000255585	50	100	9	ENSG00000255585	137776539	137789235	forkhead box H1 (FOXH1) pseudogene	no	no	no	no
ENSG00000255920	50	100	12	CCND2-AS1	4247981	4276252	CCND2 antisense RNA 1 [Source:HGNC Symbol;Acc:HGNC:49398]	no	no	no	no
ENSG00000256453	50	100	5	DND1	140670794	140673576	DND microRNA-mediated repression inhibitor 1 [Source:HGNC Symbol;Acc:HGNC:23799]	no	no	no	no
ENSG00000258056	50	100	12	CD63-AS1	55729094	55730857	CD63 antisense RNA 1 [Source:HGNC Symbol;Acc:HGNC:55455]	no	no	no	no
ENSG00000258592	50	100	14	ENSG00000258592	57066260	57112660	novel transcript	no	no	no	no
ENSG00000259033	50	100	14	ENSG00000259033	70255629	70343388	novel transcript	no	no	no	no
ENSG00000259291	50	100	15	ZNF710-AS1	90074512	90082207	ZNF710 antisense RNA 1 [Source:HGNC Symbol;Acc:HGNC:53141]	no	no	no	no
ENSG00000259343	50	100	15	TMC3-AS1	81324338	81518200	TMC3 antisense RNA 1 [Source:HGNC Symbol;Acc:HGNC:51424]	no	no	no	no
ENSG00000259366	50	100	8	ENSG00000259366	29055929	29057395	novel transcript, sense intronic to HMBOX1	no	no	no	no
ENSG00000259429	50	100	15	UBE2Q2P2	82391844	82420075	UBE2Q2 pseudogene 2 [Source:HGNC Symbol;Acc:HGNC:37440]	no	no	no	no
ENSG00000259556	50	100	15	ENSG00000259556	51919073	51930627	Leo1, Paf1/RNA polymerase II complex component, homolog (S. cerevisiae) (LEO1) pseudogene	no	no	no	no
ENSG00000259692	50	100	15	ENSG00000259692	81633426	82013579	novel transcript	no	no	no	no
ENSG00000259905	50	100	15	PWRN1	24101827	24823365	Prader-Willi region non-protein coding RNA 1 [Source:HGNC Symbol;Acc:HGNC:33235]	no	no	no	no
ENSG00000259953	50	100	9	LINC02977	112028570	112039143	long intergenic non-protein coding RNA 2977 [Source:HGNC Symbol;Acc:HGNC:56036]	no	no	no	no
ENSG00000260257	50	100	20	ENSG00000260257	32856621	32858751	novel transcript	no	no	no	no
ENSG00000260261	50	100	3	ENSG00000260261	195953349	195954485	programmed cell death 6 (PDCD6) pseudogene	no	no	no	no
ENSG00000260279	50	100	16	ENSG00000260279	89296128	89298317	novel transcript, antisense to ANKRD11	no	no	no	no
ENSG00000260296	50	100	4	ENSG00000260296	40166675	40167831	novel transcript, overlapping N4BP2	no	no	no	no
ENSG00000260404	50	100	4	ENSG00000260404	118595912	118596049	general transcription factor IIi (GTF2I) pseudogene	no	no	no	no
ENSG00000260528	50	100	16	FAM157C	90102261	90178344	family with sequence similarity 157 member C [Source:HGNC Symbol;Acc:HGNC:34081]	no	no	no	no
ENSG00000260645	50	100	6	ENSG00000260645	80466958	80469080	novel transcript	no	no	no	no
ENSG00000260903	50	100	20	XKR7	31968151	32003387	XK related 7 [Source:HGNC Symbol;Acc:HGNC:23062]	no	no	no	no
ENSG00000260941	50	100	1	LINC00622	119597702	119599271	long intergenic non-protein coding RNA 622 [Source:HGNC Symbol;Acc:HGNC:44251]	no	no	no	no
ENSG00000260948	50	100	1	ENSG00000260948	111431046	111433068	novel transcript, sense overlapping WDR77 & OVGP1	no	no	no	no
ENSG00000261087	50	100	8	ZNNT1	101166805	101169629	ZNF706 neighboring transcript 1 [Source:HGNC Symbol;Acc:HGNC:54438]	no	no	no	no
ENSG00000261172	50	100	16	ENSG00000261172	90110574	90168225	novel transcript	no	no	no	no
ENSG00000261326	50	100	1	LINC01355	23281307	23287488	long intergenic non-protein coding RNA 1355 [Source:HGNC Symbol;Acc:HGNC:50584]	no	no	no	no
ENSG00000261409	50	100
ENSG00000261556	50	100	16	SMG1P7	70219870	70246610	SMG1 pseudogene 7 [Source:HGNC Symbol;Acc:HGNC:49864]	no	no	no	no
ENSG00000261609	50	100	16	GAN	81314944	81390809	gigaxonin [Source:HGNC Symbol;Acc:HGNC:4137]	no	no	no	no
ENSG00000261787	50	100	8	TCF24	66946501	66962591	transcription factor 24 [Source:HGNC Symbol;Acc:HGNC:32275]	no	no	no	no
ENSG00000261963	50	100
ENSG00000262155	50	100	16	LINC02175	25066937	25088618	long intergenic non-protein coding RNA 2175 [Source:HGNC Symbol;Acc:HGNC:27550]	no	no	no	no
ENSG00000262160	50	100	16	ENSG00000262160	68225969	68229145	novel transcript, antisense to NFATC3	no	no	no	no
ENSG00000262580	50	100	17	ENSG00000262580	80200673	80205949	novel transcript, antisense to CARD14	no	no	no	no
ENSG00000262663	50	100	17	ENSG00000262663	82918282	82918785	novel transcript, sense intronic TBCD	no	no	no	no
ENSG00000262714	50	100	16	ENSG00000262714	53386944	53389085	novel transcript	no	no	no	no
ENSG00000262902	50	100	17	MTCO1P40	53105734	53106358	MT-CO1 pseudogene 40 [Source:HGNC Symbol;Acc:HGNC:52105]	no	no	no	no
ENSG00000263069	50	100	17	RNF213-AS1	80351828	80415168	RNF213 antisense RNA 1 [Source:HGNC Symbol;Acc:HGNC:54402]	no	no	no	no
ENSG00000263826	50	100	3	ENSG00000263826	186781780	186784179	novel transcript, antisense to eukaryotic translation initiation factor 4A, isoform 2 EIF4A2	no	no	no	no
ENSG00000264112	50	100	17	ENSG00000264112	57989039	57994850	novel transcript	no	no	no	no
ENSG00000266173	50	100	17	STRADA	63682336	63741986	STE20 related adaptor alpha [Source:HGNC Symbol;Acc:HGNC:30172]	no	no	no	no
ENSG00000266338	50	100	1	NBPF15	144421390	144461676	NBPF member 15 [Source:HGNC Symbol;Acc:HGNC:28791]	no	no	no	no
ENSG00000266962	50	100	17	HSD17B1-AS1	42552431	42554841	HSD17B1 antisense RNA 1 [Source:HGNC Symbol;Acc:HGNC:55314]	no	no	no	no
ENSG00000266970	50	100	17	SOCS3-DT	78360376	78373911	SOCS3 divergent transcript [Source:HGNC Symbol;Acc:HGNC:52799]	no	no	no	no
ENSG00000267199	50	100	18	ENSG00000267199	12438890	12448205	novel transcript, antisense SPIRE1	no	no	no	no
ENSG00000267260	50	100	19	ENSG00000267260	36773100	36777078	novel transcript	no	no	no	no
ENSG00000267270	50	100	18	PARD6G-AS1	80147908	80179839	PARD6G antisense RNA 1 [Source:HGNC Symbol;Acc:HGNC:44109]	no	no	no	no
ENSG00000267284	50	100	18	ENSG00000267284	55589904	55839184	novel transcript	no	no	no	no
ENSG00000267313	50	100	18	ENSG00000267313	41465783	41632185	keratoconus gene 6 [Source:NCBI gene (formerly Entrezgene);Acc:641516]	no	no	no	no
ENSG00000267327	50	100	18	ENSG00000267327	55893038	56026082	novel transcript	no	no	no	no
ENSG00000267719	50	100	17	LINC02078	79707266	79712317	long intergenic non-protein coding RNA 2078 [Source:HGNC Symbol;Acc:HGNC:52926]	no	no	no	no
ENSG00000267742	50	100	18	SINHCAFP2	60016778	60017441	SINHCAF pseudogene 2 [Source:HGNC Symbol;Acc:HGNC:31737]	no	no	no	no
ENSG00000267793	50	100	Y	ENSG00000267793	19598188	19598757	ADAM metallopeptidase domain (ADAM) pseudogene	no	no	no	no
ENSG00000267904	50	100	19	ENSG00000267904	16639967	16640668	novel transcript, sense intronic C19orf42	no	no	no	no
ENSG00000267909	50	100	14	CCDC177	69569799	69574871	coiled-coil domain containing 177 [Source:HGNC Symbol;Acc:HGNC:23243]	no	no	no	no
ENSG00000268119	50	100	19	ENSG00000268119	21444241	21463908	novel transcript	no	no	no	no
ENSG00000268205	50	100	19	ENSG00000268205	57304305	57308562	novel transcript	no	no	no	no
ENSG00000268658	50	100	19	LINC00664	21483374	21503238	long intergenic non-protein coding RNA 664 [Source:HGNC Symbol;Acc:HGNC:44319]	no	no	no	no
ENSG00000268869	50	100	1	ESPNP	16692280	16720157	espin pseudogene [Source:HGNC Symbol;Acc:HGNC:23285]	no	no	no	no
ENSG00000269821	50	100	11	KCNQ1OT1	2608328	2699994	KCNQ1 opposite strand/antisense transcript 1 [Source:HGNC Symbol;Acc:HGNC:6295]	no	no	no	no
ENSG00000269896	50	100	1	ENSG00000269896	2350414	2352820	small nuclear ribonucleoprotein N (SNRPN) pseudogene	no	no	no	no
ENSG00000269968	50	100	12	ENSG00000269968	6537794	6538370	novel transcript, antisense to GAPDH	no	no	no	no
ENSG00000269994	50	100	9	LINC02893	87008440	87042419	long intergenic non-protein coding RNA 2893 [Source:HGNC Symbol;Acc:HGNC:55359]	no	no	no	no
ENSG00000270231	50	100	1	NBPF8	120415035	120469676	NBPF member 8 [Source:HGNC Symbol;Acc:HGNC:31990]	no	no	no	no
ENSG00000270580	50	100	16	ENSG00000270580	15104723	15131601	PKD1P6-NPIPP1 readthrough [Source:NCBI gene (formerly Entrezgene);Acc:105369154]	no	no	no	no
ENSG00000270629	50	100	1	NBPF14	148531385	148679742	NBPF member 14 [Source:HGNC Symbol;Acc:HGNC:25232]	no	no	no	no
ENSG00000271833	50	100	9	ENSG00000271833	127366770	127367397	novel transcript	no	no	no	no
ENSG00000271971	50	100	8	ENSG00000271971	93715378	93716113	novel transcript, antisense to FAM92A1	no	no	no	no
ENSG00000272054	50	100	2	ENSG00000272054	37208875	37212677	novel transcript	no	no	no	no
ENSG00000272079	50	100	16	ENSG00000272079	3006120	3007388	novel transcript	no	no	no	no
ENSG00000272578	50	100	22	ENSG00000272578	23659869	23717295	glucuronidase, beta (GUSB) pseudogene	no	no	no	no
ENSG00000272688	50	100	18	ENSG00000272688	3245288	3247433	novel transcript	no	no	no	no
ENSG00000273033	50	100	3	LINC02035	122886941	122892416	long intergenic non-protein coding RNA 2035 [Source:HGNC Symbol;Acc:HGNC:52875]	no	no	no	no
ENSG00000273149	50	100	13	ENSG00000273149	45340039	45341183	novel transcript, antisense to TPT1	no	no	no	no
ENSG00000273210	50	100	21	ENSG00000273210	37365477	37365932	novel transcript, antisense to DYRK1A	no	no	no	no
ENSG00000273373	50	100	1	SLC16A4-AS1	110370154	110373003	SLC16A4 antisense RNA 1 [Source:HGNC Symbol;Acc:HGNC:56051]	no	no	no	no
ENSG00000273449	50	100	4	ENSG00000273449	163529771	163530697	novel transcript	no	no	no	no
ENSG00000273759	50	100	20	ENSG00000273759	62928621	62929297	novel transcript	no	no	no	no
ENSG00000274265	50	100	1	ENSG00000274265	149175748	149259987	novel transcript	no	no	no	no
ENSG00000274276	50	100	21	ENSG00000274276	6444869	6467513	cystathionine-beta-synthase like	no	no	no	no
ENSG00000274471	50	100	15	ENSG00000274471	23309607	23313276	hect domain and RLD 2 (HERC2) pseudogene	no	no	no	no
ENSG00000274588	50	100	X	DGKK	50365409	50470825	diacylglycerol kinase kappa [Source:HGNC Symbol;Acc:HGNC:32395]	no	no	no	no
ENSG00000274652	50	100	13	ENSG00000274652	51180178	51180967	novel transcript	no	no	no	no
ENSG00000275131	50	100	1	PDE4DIPP2	120489860	120701289	PDE4DIP pseudogene 2 [Source:HGNC Symbol;Acc:HGNC:55081]	no	no	no	no
ENSG00000275464	50	100	21	ENSG00000275464	5130871	5154658	novel protein, similar to PWP2 periodic tryptophan protein homolog (yeast) PWP2	no	no	no	no
ENSG00000275557	50	100	1	ENSG00000275557	149607765	149612402	novel transcript	no	no	no	no
ENSG00000276248	50	100	13	ENSG00000276248	113527260	113530621	novel transcript, sense intronic to TMCO3	no	no	no	no
ENSG00000276345	50	100	KI270721.1	ENSG00000276345	2585	11802		no	no	no	no
ENSG00000276449	50	100	19	ENSG00000276449	57449689	57453011	novel transcript	no	no	no	no
ENSG00000276672	50	100	13	ENSG00000276672	33846190	33850825	novel transcript, sense intronic to RFC3	no	no	no	no
ENSG00000276791	50	100	16	ENSG00000276791	2777319	2780568	novel transcript	no	no	no	no
ENSG00000277103	50	100	9	ENSG00000277103	97151894	97152694	sorting nexin 18 (SNX18) pseudogene	no	no	no	no
ENSG00000278467	50	100	1	ENSG00000278467	223994262	223995196	novel transcript	no	no	no	no
ENSG00000278662	50	100	15	GOLGA6L10	82339993	82349475	golgin A6 family like 10 [Source:HGNC Symbol;Acc:HGNC:37228]	no	no	no	no
ENSG00000278875	50	100	19	ENSG00000278875	31364297	31366098	TEC	no	no	no	no
ENSG00000279039	50	100	19	ENSG00000279039	20207192	20209789	TEC	no	no	no	no
ENSG00000279041	50	100	8	ENSG00000279041	30552345	30553766	TEC	no	no	no	no
ENSG00000279069	50	100	17	ENSG00000279069	58006652	58009596	novel transcript	no	no	no	no
ENSG00000279089	50	100	17	ENSG00000279089	51183191	51186403	TEC	no	no	no	no
ENSG00000279159	50	100	22	ENSG00000279159	29978950	30028236	novel transcript, antisense to MTMR3	no	no	no	no
ENSG00000279249	50	100	16	ENSG00000279249	49282021	49350504	novel transcript, antisense to CBLN1	no	no	no	no
ENSG00000279347	50	100	8	ENSG00000279347	119838736	119840385	TEC	no	no	no	no
ENSG00000279400	50	100
ENSG00000279457	50	100	1	WASH9P	185217	195411	WAS protein family homolog 9, pseudogene [Source:HGNC Symbol;Acc:HGNC:53981]	no	no	no	no
ENSG00000279531	50	100	5	ENSG00000279531	25425412	25425599	TEC	no	no	no	no
ENSG00000279726	50	100	5	ENSG00000279726	140785698	140828549	novel transcript, antisense to PCDHA5, PCDHA4, PCDHA3, PCDHA2 and PCDHA1	no	no	no	no
ENSG00000279759	50	100	19	ENSG00000279759	40355842	40360606	TEC	no	no	no	no
ENSG00000279821	50	100	5	ENSG00000279821	177476631	177479656	TEC	no	no	no	no
ENSG00000279852	50	100	8	ENSG00000279852	486117	488512	TEC	no	no	no	no
ENSG00000280056	50	100	4	ENSG00000280056	92260367	92260751	tec	no	no	no	no
ENSG00000280071	50	100	21	ENSG00000280071	5116341	5128369	novel protein, similar to chromosome 21 open reading frame 33 C21orf33	no	no	no	no
ENSG00000280119	50	100	2	ENSG00000280119	242001209	242006013	TEC	no	no	no	no
ENSG00000280142	50	100	X	ENSG00000280142	122242008	122242616	TEC	no	no	no	no
ENSG00000280187	50	100	5	ENSG00000280187	69186359	69189511	TEC	no	no	no	no
ENSG00000280322	50	100
ENSG00000280347	50	100	7	ENSG00000280347	127359785	127364759	TEC	no	no	no	no
ENSG00000280355	50	100	10	ENSG00000280355	79681973	79684094	novel transcript	no	no	no	no
ENSG00000280587	50	100	1	LINC01348	235064927	235074220	long intergenic non-protein coding RNA 1348 [Source:HGNC Symbol;Acc:HGNC:50567]	no	no	no	no
ENSG00000280780	50	100	5	JAKMIP2-AS1	147559994	147694827	JAKMIP2 antisense RNA 1 [Source:HGNC Symbol;Acc:HGNC:27203]	no	no	no	no
ENSG00000280987	50	100	5	ENSG00000280987	139273752	139331671	matrin 3 [Source:NCBI gene (formerly Entrezgene);Acc:9782]	no	no	no	no
ENSG00000281026	50	100	13	N4BP2L2-IT2	32504506	32509395	N4BPL2 intronic transcript 2 [Source:HGNC Symbol;Acc:HGNC:25038]	no	no	no	no
ENSG00000281183	50	100	15	NPTN-IT1	73567012	73569294	NPTN intronic transcript 1 [Source:HGNC Symbol;Acc:HGNC:45091]	no	no	no	no
ENSG00000281207	50	100	1	SLFNL1-AS1	41014590	41043890	SLFNL1 antisense RNA 1 [Source:HGNC Symbol;Acc:HGNC:44126]	no	no	no	no
ENSG00000281344	50	100	12	HELLPAR	102197585	102402596	HELLP associated long non-coding RNA [Source:HGNC Symbol;Acc:HGNC:43984]	no	no	no	no
ENSG00000282012	50	100	22	ENSG00000282012	24691122	24696019	novel transcript	no	no	no	no
ENSG00000282508	50	100	19	LINC01002	198264	246544	long intergenic non-protein coding RNA 1002 [Source:HGNC Symbol;Acc:HGNC:38538]	no	no	no	no
ENSG00000282718	50	100	1	ENSG00000282718	212916787	212917577	novel transcript	no	no	no	no
ENSG00000283312	50	100	2	ENSG00000283312	231493708	231495299	GTF2I repeat domain containing 2(GTF2IRD2) pseudogene	no	no	no	no
ENSG00000283674	50	100	8	ENSG00000283674	12467693	12665588	novel transcript	no	no	no	no
ENSG00000283709	50	100	10	FAM238C	26931276	26934516	family with sequence similarity 238 member C [Source:HGNC Symbol;Acc:HGNC:24672]	no	no	no	no
ENSG00000283945	50	100	9	LINC00032	27245680	27278503	long intergenic non-protein coding RNA 32 [Source:HGNC Symbol;Acc:HGNC:16506]	no	no	no	no
ENSG00000283982	50	100	9	ENSG00000283982	23500691	23672387	novel transcript	no	no	no	no
ENSG00000284194	50	100	22	SCO2	50523568	50526461	synthesis of cytochrome C oxidase 2 [Source:HGNC Symbol;Acc:HGNC:10604]	no	no	no	no
ENSG00000285103	50	100	9	ENSG00000285103	27529085	27543902	novel transcript	no	no	no	no
ENSG00000285689	50	100	5	ENSG00000285689	7272792	7276923	novel transcript	no	no	no	no
ENSG00000286207	50	100	2	ENSG00000286207	152635268	152641275	novel transcript, antisense to FMNL2	no	no	no	no
ENSG00000286214	50	100	7	COPG2IT1	130538954	130546900	COPG2 imprinted transcript 1 [Source:HGNC Symbol;Acc:HGNC:2238]	no	no	no	no
ENSG00000286379	50	100	1	ENSG00000286379	36329630	36335406	novel transcript	no	no	no	no
ENSG00000286588	50	100	2	ENSG00000286588	241326334	241327039	novel transcript, antisense to SEPT2	no	no	no	no
ENSG00000286757	50	100	13	ENSG00000286757	99841879	99957659	novel transcript, antisense to CLYBL	no	no	no	no
ENSG00000286797	50	100	2	ENSG00000286797	185425063	185505608	novel transcript	no	no	no	no
ENSG00000286811	50	100	6	ENSG00000286811	48069213	48111078	novel transcript	no	no	no	no
ENSG00000287315	50	100	1	ENSG00000287315	228357012	228368554	novel transcript, antisense to OBSCN	no	no	no	no
ENSG00000287430	50	100	20	ENSG00000287430	19208652	19212164	novel transcript	no	no	no	no
ENSG00000287560	50	100	10	ENSG00000287560	3042535	3047083	novel transcript	no	no	no	no
ENSG00000287562	50	100	6	ENSG00000287562	44090787	44095585	novel transcript	no	no	no	no
ENSG00000287725	50	100	11	ENSG00000287725	69072915	69162440	novel protein, TPCN2 - SMIM38 readthrough	no	no	no	no
ENSG00000288597	50	100	X	ENSG00000288597	103707034	103919047	novel transcript	no	no	no	no
ENSG00000042062	49	98	20	RIPOR3	50586108	50691542	RIPOR family member 3 [Source:HGNC Symbol;Acc:HGNC:16168]	no	no	no	no
ENSG00000091656	49	98	8	ZFHX4	76681239	76867281	zinc finger homeobox 4 [Source:HGNC Symbol;Acc:HGNC:30939]	no	no	no	no
ENSG00000100146	49	98	22	SOX10	37970686	37987422	SRY-box transcription factor 10 [Source:HGNC Symbol;Acc:HGNC:11190]	no	no	no	no
ENSG00000100478	49	98	14	AP4S1	31025106	31130996	adaptor related protein complex 4 subunit sigma 1 [Source:HGNC Symbol;Acc:HGNC:575]	no	no	no	no
ENSG00000107262	49	98	9	BAG1	33247820	33264720	BAG cochaperone 1 [Source:HGNC Symbol;Acc:HGNC:937]	no	no	no	no
ENSG00000112159	49	98	6	MDN1	89642498	89819794	midasin AAA ATPase 1 [Source:HGNC Symbol;Acc:HGNC:18302]	no	no	no	no
ENSG00000112394	49	98	6	SLC16A10	111087503	111231194	solute carrier family 16 member 10 [Source:HGNC Symbol;Acc:HGNC:17027]	no	no	no	no
ENSG00000128340	49	98	22	RAC2	37225270	37259594	Rac family small GTPase 2 [Source:HGNC Symbol;Acc:HGNC:9802]	no	no	no	no
ENSG00000128872	49	98	15	TMOD2	51751597	51816363	tropomodulin 2 [Source:HGNC Symbol;Acc:HGNC:11872]	no	no	no	no
ENSG00000130303	49	98	19	BST2	17402939	17405630	bone marrow stromal cell antigen 2 [Source:HGNC Symbol;Acc:HGNC:1119]	no	no	no	no
ENSG00000132141	49	98	17	CCT6B	34927859	34981078	chaperonin containing TCP1 subunit 6B [Source:HGNC Symbol;Acc:HGNC:1621]	no	no	no	no
ENSG00000132773	49	98	1	TOE1	45340052	45343973	target of EGR1, exonuclease [Source:HGNC Symbol;Acc:HGNC:15954]	no	no	no	no
ENSG00000138080	49	98	2	EMILIN1	27078615	27086403	elastin microfibril interfacer 1 [Source:HGNC Symbol;Acc:HGNC:19880]	no	no	no	no
ENSG00000138316	49	98	10	ADAMTS14	70672506	70762441	ADAM metallopeptidase with thrombospondin type 1 motif 14 [Source:HGNC Symbol;Acc:HGNC:14899]	no	no	no	no
ENSG00000138400	49	98	2	MDH1B	206737763	206765328	malate dehydrogenase 1B [Source:HGNC Symbol;Acc:HGNC:17836]	no	no	no	no
ENSG00000145012	49	98	3	LPP	188153284	188890671	LIM domain containing preferred translocation partner in lipoma [Source:HGNC Symbol;Acc:HGNC:6679]	no	no	no	no
ENSG00000146592	49	98	7	CREB5	28299321	28825894	cAMP responsive element binding protein 5 [Source:HGNC Symbol;Acc:HGNC:16844]	no	no	no	no
ENSG00000152518	49	98	2	ZFP36L2	43222402	43226606	ZFP36 ring finger protein like 2 [Source:HGNC Symbol;Acc:HGNC:1108]	no	no	no	no
ENSG00000153446	49	98	16	C16orf89	5044122	5066110	chromosome 16 open reading frame 89 [Source:HGNC Symbol;Acc:HGNC:28687]	no	no	no	no
ENSG00000153993	49	98	7	SEMA3D	84995553	85187056	semaphorin 3D [Source:HGNC Symbol;Acc:HGNC:10726]	no	no	no	no
ENSG00000157214	49	98	7	STEAP2	90167590	90238137	STEAP2 metalloreductase [Source:HGNC Symbol;Acc:HGNC:17885]	no	no	no	no
ENSG00000162241	49	98	11	SLC25A45	65375192	65383701	solute carrier family 25 member 45 [Source:HGNC Symbol;Acc:HGNC:27442]	no	no	no	no
ENSG00000162543	49	98	1	UBXN10	20186096	20196050	UBX domain protein 10 [Source:HGNC Symbol;Acc:HGNC:26354]	no	no	no	no
ENSG00000162639	49	98	1	HENMT1	108648290	108661526	HEN methyltransferase 1 [Source:HGNC Symbol;Acc:HGNC:26400]	no	no	no	no
ENSG00000163467	49	98	1	TSACC	156337314	156346995	TSSK6 activating cochaperone [Source:HGNC Symbol;Acc:HGNC:30636]	no	no	no	no
ENSG00000163958	49	98	3	ZDHHC19	196197452	196211437	zinc finger DHHC-type palmitoyltransferase 19 [Source:HGNC Symbol;Acc:HGNC:20713]	no	no	no	no
ENSG00000164309	49	98	5	CMYA5	79689836	79800240	cardiomyopathy associated 5 [Source:HGNC Symbol;Acc:HGNC:14305]	no	no	no	no
ENSG00000164989	49	98	9	CCDC171	15553043	16061663	coiled-coil domain containing 171 [Source:HGNC Symbol;Acc:HGNC:29828]	no	no	no	no
ENSG00000168309	49	98	3	FAM107A	58564117	58627610	family with sequence similarity 107 member A [Source:HGNC Symbol;Acc:HGNC:30827]	no	no	no	no
ENSG00000168806	49	98	15	LCMT2	43323649	43330582	leucine carboxyl methyltransferase 2 [Source:HGNC Symbol;Acc:HGNC:17558]	no	no	no	no
ENSG00000169851	49	98	4	PCDH7	30720369	31146805	protocadherin 7 [Source:HGNC Symbol;Acc:HGNC:8659]	no	no	no	no
ENSG00000170619	49	98	8	COMMD5	144841042	144853736	COMM domain containing 5 [Source:HGNC Symbol;Acc:HGNC:17902]	no	no	no	no
ENSG00000171533	49	98	11	MAP6	75586918	75669038	microtubule associated protein 6 [Source:HGNC Symbol;Acc:HGNC:6868]	no	no	no	no
ENSG00000174628	49	98	16	IQCK	19716456	19858467	IQ motif containing K [Source:HGNC Symbol;Acc:HGNC:28556]	no	no	no	no
ENSG00000175283	49	98	9	DOLK	128945530	128947603	dolichol kinase [Source:HGNC Symbol;Acc:HGNC:23406]	no	no	no	no
ENSG00000176024	49	98	19	ZNF613	51927147	51948759	zinc finger protein 613 [Source:HGNC Symbol;Acc:HGNC:25827]	no	no	no	no
ENSG00000176884	49	98	9	GRIN1	137138346	137168756	glutamate ionotropic receptor NMDA type subunit 1 [Source:HGNC Symbol;Acc:HGNC:4584]	no	no	no	no
ENSG00000177946	49	98	16	CENPBD1P	89969791	89972534	CENPB DNA-binding domain containing 1, pseudogene [Source:HGNC Symbol;Acc:HGNC:28272]	no	no	no	no
ENSG00000182473	49	98	17	EXOC7	76081016	76121576	exocyst complex component 7 [Source:HGNC Symbol;Acc:HGNC:23214]	no	no	no	no
ENSG00000183978	49	98	17	COA3	42795147	42798704	cytochrome c oxidase assembly factor 3 [Source:HGNC Symbol;Acc:HGNC:24990]	no	no	no	no
ENSG00000188191	49	98	7	PRKAR1B	549197	727650	protein kinase cAMP-dependent type I regulatory subunit beta [Source:HGNC Symbol;Acc:HGNC:9390]	no	no	no	no
ENSG00000196104	49	98	4	SPOCK3	166733384	167234796	SPARC (osteonectin), cwcv and kazal like domains proteoglycan 3 [Source:HGNC Symbol;Acc:HGNC:13565]	no	no	no	no
ENSG00000198883	49	98	X	PNMA5	152988824	152994116	PNMA family member 5 [Source:HGNC Symbol;Acc:HGNC:18743]	no	no	yes	no
ENSG00000203721	49	98	1	LINC00862	200253419	200400705	long intergenic non-protein coding RNA 862 [Source:HGNC Symbol;Acc:HGNC:21901]	no	no	no	no
ENSG00000203875	49	98	6	SNHG5	85650491	85678932	small nucleolar RNA host gene 5 [Source:HGNC Symbol;Acc:HGNC:21026]	no	no	no	no
ENSG00000213671	49	98	17	OLA1P2	20775642	20776905	OLA1 pseudogene 2 [Source:HGNC Symbol;Acc:HGNC:45277]	no	no	no	no
ENSG00000214872	49	98	11	SMTNL1	57537595	57550272	smoothelin like 1 [Source:HGNC Symbol;Acc:HGNC:32394]	no	no	no	no
ENSG00000228038	49	98	9	VN1R51P	97093694	97094638	vomeronasal 1 receptor 51 pseudogene [Source:HGNC Symbol;Acc:HGNC:37371]	no	no	no	no
ENSG00000228192	49	98	1	ZNF691-DT	42832522	42846427	ZNF691 divergent transcript [Source:HGNC Symbol;Acc:HGNC:55800]	no	no	no	no
ENSG00000228506	49	98	6	PNISR-AS1	99424911	99432326	PNISR antisense RNA 1 [Source:HGNC Symbol;Acc:HGNC:40958]	no	no	no	no
ENSG00000229036	49	98	6	VDAC1P8	143490424	143506406	voltage dependent anion channel 1 pseudogene 8 [Source:HGNC Symbol;Acc:HGNC:37483]	no	no	no	no
ENSG00000235106	49	98	9	BRD3OS	134025481	134034666	BRD3 opposite strand [Source:HGNC Symbol;Acc:HGNC:24742]	no	no	no	no
ENSG00000235257	49	98	3	ITGA9-AS1	37693655	37861802	ITGA9 antisense RNA 1 [Source:HGNC Symbol;Acc:HGNC:49668]	no	no	no	no
ENSG00000235859	49	98	7	ENSG00000235859	30371508	30372741	proteasome (prosome, macropain) 26S subunit, ATPase, 5 (PSMC5) pseudogene	no	no	no	no
ENSG00000237491	49	98	1	LINC01409	778747	810065	long intergenic non-protein coding RNA 1409 [Source:HGNC Symbol;Acc:HGNC:50701]	no	no	no	no
ENSG00000237945	49	98	21	LINC00649	33915534	33977703	long intergenic non-protein coding RNA 649 [Source:HGNC Symbol;Acc:HGNC:44305]	no	no	no	no
ENSG00000242028	49	98	15	HYPK	43796142	43804427	huntingtin interacting protein K [Source:HGNC Symbol;Acc:HGNC:18418]	no	no	no	no
ENSG00000246582	49	98	8	TNFRSF10A-DT	23224471	23230926	TNFRSF10A divergent transcript [Source:HGNC Symbol;Acc:HGNC:52647]	no	no	no	no
ENSG00000256673	49	98	12	ENSG00000256673	9398355	9414851	ovostatin (OVOS) pseudogene	no	no	no	no
ENSG00000260230	49	98	9	FRRS1L	109130293	109167249	ferric chelate reductase 1 like [Source:HGNC Symbol;Acc:HGNC:1362]	no	no	no	no
ENSG00000260719	49	98	16	ENSG00000260719	29745247	29748299	novel transcript, antisense to C16orf54	no	no	no	no
ENSG00000267530	49	98	19	LINC01836	782755	786092	long intergenic non-protein coding RNA 1836 [Source:HGNC Symbol;Acc:HGNC:52652]	no	no	no	no
ENSG00000268903	49	98	1	ENSG00000268903	135141	135895	novel pseudogene	no	no	no	no
ENSG00000272711	49	98	2	HK2-DT	74832655	74833987	HK2 divergent transcript [Source:HGNC Symbol;Acc:HGNC:55204]	no	no	no	no
ENSG00000273654	49	98	19	ENSG00000273654	18022403	18032099	citrate synthase (CS) pseudogene	no	no	no	no
ENSG00000276476	49	98	13	ENSG00000276476	22040972	22276526	long intergenic non-protein coding RNA 540 [Source:NCBI gene (formerly Entrezgene);Acc:100506622]	no	no	no	no
ENSG00000278864	49	98	17	ENSG00000278864	17181504	17183257	novel transcript	no	no	no	no
ENSG00000279968	49	98	6	CCDC28A-AS1	138725211	138773652	CCDC28A antisense RNA 1 [Source:HGNC Symbol;Acc:HGNC:51715]	no	no	no	no
ENSG00000280099	49	98	1	ENSG00000280099	85152487	85154203	TEC	no	no	no	no
ENSG00000076067	48	96	12	RBMS2	56521820	56596193	RNA binding motif single stranded interacting protein 2 [Source:HGNC Symbol;Acc:HGNC:9909]	no	no	no	no
ENSG00000076356	48	96	1	PLXNA2	208022242	208244384	plexin A2 [Source:HGNC Symbol;Acc:HGNC:9100]	no	no	no	no
ENSG00000084453	48	96	12	SLCO1A2	21264600	21419594	solute carrier organic anion transporter family member 1A2 [Source:HGNC Symbol;Acc:HGNC:10956]	no	no	no	no
ENSG00000100242	48	96	22	SUN2	38733290	38794143	Sad1 and UNC84 domain containing 2 [Source:HGNC Symbol;Acc:HGNC:14210]	no	no	no	no
ENSG00000100298	48	96	22	APOBEC3H	39097224	39104067	apolipoprotein B mRNA editing enzyme catalytic subunit 3H [Source:HGNC Symbol;Acc:HGNC:24100]	no	no	no	no
ENSG00000103042	48	96	16	SLC38A7	58665109	58684770	solute carrier family 38 member 7 [Source:HGNC Symbol;Acc:HGNC:25582]	no	no	no	no
ENSG00000104267	48	96	8	CA2	85463968	85481493	carbonic anhydrase 2 [Source:HGNC Symbol;Acc:HGNC:1373]	no	no	no	no
ENSG00000109625	48	96	4	CPZ	8592660	8619759	carboxypeptidase Z [Source:HGNC Symbol;Acc:HGNC:2333]	no	no	no	no
ENSG00000110442	48	96	11	COMMD9	36269284	36289449	COMM domain containing 9 [Source:HGNC Symbol;Acc:HGNC:25014]	no	no	no	no
ENSG00000113916	48	96	3	BCL6	187721377	187745725	BCL6 transcription repressor [Source:HGNC Symbol;Acc:HGNC:1001]	no	no	no	no
ENSG00000118855	48	96	3	MFSD1	158732198	158829719	major facilitator superfamily domain containing 1 [Source:HGNC Symbol;Acc:HGNC:25874]	no	no	no	no
ENSG00000123612	48	96	2	ACVR1C	157526767	157628864	activin A receptor type 1C [Source:HGNC Symbol;Acc:HGNC:18123]	no	no	no	no
ENSG00000124092	48	96	20	CTCFL	57495966	57525652	CCCTC-binding factor like [Source:HGNC Symbol;Acc:HGNC:16234]	no	no	no	no
ENSG00000124217	48	96	20	MOCS3	50958818	50963929	molybdenum cofactor synthesis 3 [Source:HGNC Symbol;Acc:HGNC:15765]	no	no	no	no
ENSG00000129003	48	96	15	VPS13C	61852389	62060473	vacuolar protein sorting 13 homolog C [Source:HGNC Symbol;Acc:HGNC:23594]	no	no	no	no
ENSG00000147050	48	96	X	KDM6A	44873188	45112779	lysine demethylase 6A [Source:HGNC Symbol;Acc:HGNC:12637]	no	yes	no	no
ENSG00000155066	48	96	2	PROM2	95274449	95291308	prominin 2 [Source:HGNC Symbol;Acc:HGNC:20685]	no	no	no	no
ENSG00000160221	48	96	21	GATD3	44133610	44210114	glutamine amidotransferase class 1 domain containing 3 [Source:HGNC Symbol;Acc:HGNC:1273]	no	no	no	no
ENSG00000161547	48	96	17	SRSF2	76734115	76737333	serine and arginine rich splicing factor 2 [Source:HGNC Symbol;Acc:HGNC:10783]	no	no	no	no
ENSG00000165985	48	96	10	C1QL3	16513734	16521879	complement C1q like 3 [Source:HGNC Symbol;Acc:HGNC:19359]	no	no	no	no
ENSG00000166856	48	96	12	GPR182	56994492	56998447	G protein-coupled receptor 182 [Source:HGNC Symbol;Acc:HGNC:13708]	no	no	no	no
ENSG00000167112	48	96	9	TRUB2	128305159	128322447	TruB pseudouridine synthase family member 2 [Source:HGNC Symbol;Acc:HGNC:17170]	no	no	no	no
ENSG00000167759	48	96	19	KLK13	51055626	51065114	kallikrein related peptidase 13 [Source:HGNC Symbol;Acc:HGNC:6361]	no	no	no	no
ENSG00000168675	48	96	18	LDLRAD4	13217498	13652755	low density lipoprotein receptor class A domain containing 4 [Source:HGNC Symbol;Acc:HGNC:1224]	no	no	no	no
ENSG00000170775	48	96	7	GPR37	124743885	124765792	G protein-coupled receptor 37 [Source:HGNC Symbol;Acc:HGNC:4494]	no	no	no	no
ENSG00000182057	48	96	22	OGFRP1	42269703	42279534	opioid growth factor receptor pseudogene 1 [Source:HGNC Symbol;Acc:HGNC:50511]	no	no	no	no
ENSG00000185567	48	96	14	AHNAK2	104937244	104978374	AHNAK nucleoprotein 2 [Source:HGNC Symbol;Acc:HGNC:20125]	no	no	no	no
ENSG00000196865	48	96	10	NHLRC2	113854661	113917194	NHL repeat containing 2 [Source:HGNC Symbol;Acc:HGNC:24731]	no	no	no	no
ENSG00000198795	48	96	18	ZNF521	25061924	25352190	zinc finger protein 521 [Source:HGNC Symbol;Acc:HGNC:24605]	no	no	no	no
ENSG00000204947	48	96	7	ZNF425	149102784	149126324	zinc finger protein 425 [Source:HGNC Symbol;Acc:HGNC:20690]	no	no	no	no
ENSG00000226419	48	96	1	SLC16A1-AS1	112956415	113047055	SLC16A1 antisense RNA 1 [Source:HGNC Symbol;Acc:HGNC:49445]	no	no	no	no
ENSG00000226673	48	96	6	LINC01108	14280127	14285454	long intergenic non-protein coding RNA 1108 [Source:HGNC Symbol;Acc:HGNC:49234]	no	no	no	no
ENSG00000230882	48	96	7	ENSG00000230882	76071469	76074963	hypothetical protein LOC285908 (LOC285908) pseudogene	no	no	no	no
ENSG00000230937	48	96	1	MIR205HG	209428817	209432848	MIR205 host gene [Source:HGNC Symbol;Acc:HGNC:43562]	no	no	no	no
ENSG00000231154	48	96	X	MORF4L2-AS1	103687284	103691772	MORF4L2 antisense RNA 1 [Source:HGNC Symbol;Acc:HGNC:27991]	no	no	yes	no
ENSG00000232656	48	96	10	IDI2-AS1	1022618	1045425	IDI2 antisense RNA 1 [Source:HGNC Symbol;Acc:HGNC:30885]	no	no	no	no
ENSG00000243701	48	96	3	DUBR	107220744	107348464	DPPA2 upstream binding RNA [Source:HGNC Symbol;Acc:HGNC:48569]	no	no	no	no
ENSG00000247903	48	96	12	ENSG00000247903	26971586	26979582	novel transcript, antisense to TM7SF3	no	no	no	no
ENSG00000251602	48	96	14	MTA1-DT	105416884	105419739	MTA1 divergent transcript [Source:HGNC Symbol;Acc:HGNC:56032]	no	no	no	no
ENSG00000253816	48	96	5	GUSBP14	70219918	70258930	GUSB pseudogene 14 [Source:HGNC Symbol;Acc:HGNC:54496]	no	no	no	no
ENSG00000260807	48	96	16	CEROX1	975761	981596	cytoplasmic endogenous regulator of oxidative phosphorylation 1 [Source:HGNC Symbol;Acc:HGNC:53928]	no	no	no	no
ENSG00000269837	48	96	19	IPO5P1	23255053	23257939	importin 5 pseudogene 1 [Source:HGNC Symbol;Acc:HGNC:49687]	no	no	no	no
ENSG00000271425	48	96	1	NBPF10	146064711	146229000	NBPF member 10 [Source:HGNC Symbol;Acc:HGNC:31992]	no	no	no	no
ENSG00000278558	48	96	22	TMEM191B	18527802	18530573	transmembrane protein 191B [Source:HGNC Symbol;Acc:HGNC:33600]	no	no	no	no
ENSG00000279481	48	96	4	ENSG00000279481	145830456	145832980	TEC	no	no	no	no
ENSG00000283491	48	96	2	ENSG00000283491	231497090	231507256	nucleolin (NCL) pseudogene	no	no	no	no
ENSG00000286449	48	96	19	ENSG00000286449	37304451	37309641	novel transcript	no	no	no	no
ENSG00000286699	48	96
ENSG00000178075	48	96	3	GRAMD1C	113828182	113947174	GRAM domain containing 1C [Source:HGNC Symbol;Acc:HGNC:25252]	no	no	no	no
ENSG00000026950	47	94	6	BTN3A1	26402237	26415208	butyrophilin subfamily 3 member A1 [Source:HGNC Symbol;Acc:HGNC:1138]	no	no	no	no
ENSG00000069020	47	94	5	MAST4	66596380	67169593	microtubule associated serine/threonine kinase family member 4 [Source:HGNC Symbol;Acc:HGNC:19037]	no	no	no	no
ENSG00000070669	47	94	7	ASNS	97851677	97872542	asparagine synthetase (glutamine-hydrolyzing) [Source:HGNC Symbol;Acc:HGNC:753]	no	no	no	no
ENSG00000077522	47	94	1	ACTN2	236664141	236764631	actinin alpha 2 [Source:HGNC Symbol;Acc:HGNC:164]	no	no	no	no
ENSG00000084073	47	94	1	ZMPSTE24	40258041	40294180	zinc metallopeptidase STE24 [Source:HGNC Symbol;Acc:HGNC:12877]	no	no	no	no
ENSG00000092377	47	94	Y	TBL1Y	6910686	7101970	transducin beta like 1 Y-linked [Source:HGNC Symbol;Acc:HGNC:18502]	no	no	no	no
ENSG00000112149	47	94	6	CD83	14117256	14136918	CD83 molecule [Source:HGNC Symbol;Acc:HGNC:1703]	no	no	no	no
ENSG00000113430	47	94	5	IRX4	1877413	1887236	iroquois homeobox 4 [Source:HGNC Symbol;Acc:HGNC:6129]	no	no	no	no
ENSG00000114315	47	94	3	HES1	194136148	194138732	hes family bHLH transcription factor 1 [Source:HGNC Symbol;Acc:HGNC:5192]	no	no	no	no
ENSG00000117724	47	94	1	CENPF	214603185	214664574	centromere protein F [Source:HGNC Symbol;Acc:HGNC:1857]	no	no	no	no
ENSG00000118971	47	94	12	CCND2	4269771	4305353	cyclin D2 [Source:HGNC Symbol;Acc:HGNC:1583]	no	no	no	no
ENSG00000124160	47	94	20	NCOA5	46060991	46089962	nuclear receptor coactivator 5 [Source:HGNC Symbol;Acc:HGNC:15909]	no	no	no	no
ENSG00000127540	47	94	19	UQCR11	1597169	1605473	ubiquinol-cytochrome c reductase, complex III subunit XI [Source:HGNC Symbol;Acc:HGNC:30862]	no	no	no	no
ENSG00000130600	47	94	11	H19	1995166	2001470	H19 imprinted maternally expressed transcript [Source:HGNC Symbol;Acc:HGNC:4713]	no	no	no	no
ENSG00000138650	47	94	4	PCDH10	133149294	133208606	protocadherin 10 [Source:HGNC Symbol;Acc:HGNC:13404]	no	no	no	no
ENSG00000138670	47	94	4	RASGEF1B	81426393	82044244	RasGEF domain family member 1B [Source:HGNC Symbol;Acc:HGNC:24881]	no	no	no	no
ENSG00000138829	47	94	5	FBN2	128257909	128659185	fibrillin 2 [Source:HGNC Symbol;Acc:HGNC:3604]	no	no	no	no
ENSG00000140563	47	94	15	MCTP2	94231538	94483952	multiple C2 and transmembrane domain containing 2 [Source:HGNC Symbol;Acc:HGNC:25636]	no	no	no	no
ENSG00000143178	47	94	1	TBX19	168280877	168314426	T-box transcription factor 19 [Source:HGNC Symbol;Acc:HGNC:11596]	no	no	no	no
ENSG00000158683	47	94	7	PKD1L1	47740202	47948466	polycystin 1 like 1, transient receptor potential channel interacting [Source:HGNC Symbol;Acc:HGNC:18053]	no	no	no	no
ENSG00000164764	47	94	8	SBSPON	73064543	73124088	somatomedin B and thrombospondin type 1 domain containing [Source:HGNC Symbol;Acc:HGNC:30362]	no	no	no	no
ENSG00000164879	47	94	8	CA3	85373436	85449040	carbonic anhydrase 3 [Source:HGNC Symbol;Acc:HGNC:1374]	no	no	no	no
ENSG00000166825	47	94	15	ANPEP	89784895	89815401	alanyl aminopeptidase, membrane [Source:HGNC Symbol;Acc:HGNC:500]	no	no	no	no
ENSG00000166897	47	94	22	ELFN2	37367960	37427479	extracellular leucine rich repeat and fibronectin type III domain containing 2 [Source:HGNC Symbol;Acc:HGNC:29396]	no	no	no	no
ENSG00000174007	47	94	3	CEP19	196706277	196712250	centrosomal protein 19 [Source:HGNC Symbol;Acc:HGNC:28209]	no	no	no	no
ENSG00000178409	47	94	6	BEND3	107065182	107115515	BEN domain containing 3 [Source:HGNC Symbol;Acc:HGNC:23040]	no	no	no	no
ENSG00000180353	47	94	3	HCLS1	121631399	121660927	hematopoietic cell-specific Lyn substrate 1 [Source:HGNC Symbol;Acc:HGNC:4844]	no	no	no	no
ENSG00000182263	47	94	2	FIGN	163593396	163736012	fidgetin, microtubule severing factor [Source:HGNC Symbol;Acc:HGNC:13285]	no	no	no	no
ENSG00000183287	47	94	18	CCBE1	59430939	59697662	collagen and calcium binding EGF domains 1 [Source:HGNC Symbol;Acc:HGNC:29426]	no	no	no	no
ENSG00000185070	47	94	14	FLRT2	85530144	85654428	fibronectin leucine rich transmembrane protein 2 [Source:HGNC Symbol;Acc:HGNC:3761]	no	no	no	no
ENSG00000185085	47	94	11	INTS5	62646848	62653302	integrator complex subunit 5 [Source:HGNC Symbol;Acc:HGNC:29352]	no	no	no	no
ENSG00000188647	47	94	9	PTAR1	69709522	69760011	protein prenyltransferase alpha subunit repeat containing 1 [Source:HGNC Symbol;Acc:HGNC:30449]	no	no	no	no
ENSG00000196295	47	94	7	GARS1-DT	30516309	30595286	GARS1 divergent transcript [Source:HGNC Symbol;Acc:HGNC:48951]	no	no	no	no
ENSG00000204839	47	94	8	MROH6	143566192	143572772	maestro heat like repeat family member 6 [Source:HGNC Symbol;Acc:HGNC:27814]	no	no	no	no
ENSG00000206561	47	94	3	COLQ	15450133	15521751	collagen like tail subunit of asymmetric acetylcholinesterase [Source:HGNC Symbol;Acc:HGNC:2226]	no	no	no	no
ENSG00000213058	47	94	1	ENSG00000213058	178411616	178411972	ribosomal protein S14 (RPS14) pseudogene	no	no	no	no
ENSG00000220804	47	94	2	LINC01881	242094894	242130807	long intergenic non-protein coding RNA 1881 [Source:HGNC Symbol;Acc:HGNC:52700]	no	no	no	no
ENSG00000226476	47	94	1	LINC01748	60515716	60640507	long intergenic non-protein coding RNA 1748 [Source:HGNC Symbol;Acc:HGNC:52535]	no	no	no	no
ENSG00000236924	47	94	9	ENSG00000236924	6645812	6694715	novel transcript	no	no	no	no
ENSG00000240006	47	94	3	LINC02004	134313498	134327944	long intergenic non-protein coding RNA 2004 [Source:HGNC Symbol;Acc:HGNC:52838]	no	no	no	no
ENSG00000247828	47	94	5	TMEM161B-DT	88268864	88439337	TMEM161B divergent transcript [Source:HGNC Symbol;Acc:HGNC:43839]	no	no	no	no
ENSG00000249803	47	94	5	ENSG00000249803	136466645	136521432	novel transcript	no	no	no	no
ENSG00000251432	47	94	4	LINC02615	128292751	128519398	long intergenic non-protein coding RNA 2615 [Source:HGNC Symbol;Acc:HGNC:53402]	no	no	no	no
ENSG00000260362	47	94	16	ENSG00000260362	9666885	9676843	novel transcript	no	no	no	no
ENSG00000269404	47	94	19	SPIB	50418938	50431314	Spi-B transcription factor [Source:HGNC Symbol;Acc:HGNC:11242]	no	no	no	no
ENSG00000270441	47	94	3	LAMB2P1	49140086	49160851	laminin subunit beta 2 pseudogene 1 [Source:HGNC Symbol;Acc:HGNC:6488]	no	no	no	no
ENSG00000272316	47	94	6	ENSG00000272316	57908560	57913911	novel transcript	no	no	no	no
ENSG00000272734	47	94	10	ADIRF-AS1	86965345	86971311	ADIRF antisense RNA 1 [Source:HGNC Symbol;Acc:HGNC:45127]	no	no	no	no
ENSG00000272841	47	94	6	MAP3K4-AS1	160990318	160992342	MAP3K4 antisense RNA 1 [Source:HGNC Symbol;Acc:HGNC:55048]	no	no	no	no
ENSG00000279170	47	94	6	TSTD3	99520976	99589899	thiosulfate sulfurtransferase like domain containing 3 [Source:HGNC Symbol;Acc:HGNC:40910]	no	no	no	no
ENSG00000285077	47	94	15	ARHGAP11B	30624494	30649529	Rho GTPase activating protein 11B [Source:HGNC Symbol;Acc:HGNC:15782]	no	no	no	no
ENSG00000198863	47	94	17	RUNDC1	42980565	42995142	RUN domain containing 1 [Source:HGNC Symbol;Acc:HGNC:25418]	no	no	no	no
ENSG00000006128	46	92	7	TAC1	97732084	97740472	tachykinin precursor 1 [Source:HGNC Symbol;Acc:HGNC:11517]	no	no	no	no
ENSG00000039068	46	92	16	CDH1	68737292	68835537	cadherin 1 [Source:HGNC Symbol;Acc:HGNC:1748]	no	no	no	no
ENSG00000064042	46	92	4	LIMCH1	41359607	41700044	LIM and calponin homology domains 1 [Source:HGNC Symbol;Acc:HGNC:29191]	no	no	no	no
ENSG00000070182	46	92	14	SPTB	64746283	64879907	spectrin beta, erythrocytic [Source:HGNC Symbol;Acc:HGNC:11274]	no	no	no	no
ENSG00000101463	46	92	20	SYNDIG1	24469629	24666616	synapse differentiation inducing 1 [Source:HGNC Symbol;Acc:HGNC:15885]	no	no	no	no
ENSG00000103056	46	92	16	SMPD3	68358327	68448508	sphingomyelin phosphodiesterase 3 [Source:HGNC Symbol;Acc:HGNC:14240]	no	no	no	no
ENSG00000110148	46	92	11	CCKBR	6259806	6272127	cholecystokinin B receptor [Source:HGNC Symbol;Acc:HGNC:1571]	no	no	no	no
ENSG00000121310	46	92	1	ECHDC2	52895910	52927212	enoyl-CoA hydratase domain containing 2 [Source:HGNC Symbol;Acc:HGNC:23408]	no	no	no	no
ENSG00000129295	46	92	8	DNAAF11	132570416	132675592	dynein axonemal assembly factor 11 [Source:HGNC Symbol;Acc:HGNC:16725]	no	no	no	no
ENSG00000129646	46	92	17	QRICH2	76274049	76308276	glutamine rich 2 [Source:HGNC Symbol;Acc:HGNC:25326]	no	no	no	no
ENSG00000132204	46	92	18	LINC00470	1254383	1408344	long intergenic non-protein coding RNA 470 [Source:HGNC Symbol;Acc:HGNC:1225]	no	no	no	no
ENSG00000135245	46	92	7	HILPDA	128455849	128458418	hypoxia inducible lipid droplet associated [Source:HGNC Symbol;Acc:HGNC:28859]	no	no	no	no
ENSG00000136895	46	92	9	GARNL3	127224265	127393660	GTPase activating Rap/RanGAP domain like 3 [Source:HGNC Symbol;Acc:HGNC:25425]	no	no	no	no
ENSG00000140859	46	92	16	KIFC3	57758217	57863053	kinesin family member C3 [Source:HGNC Symbol;Acc:HGNC:6326]	no	no	no	no
ENSG00000153933	46	92	17	DGKE	56834107	56869567	diacylglycerol kinase epsilon [Source:HGNC Symbol;Acc:HGNC:2852]	no	no	no	no
ENSG00000155542	46	92	5	SETD9	56909260	56925532	SET domain containing 9 [Source:HGNC Symbol;Acc:HGNC:28508]	no	no	no	no
ENSG00000164651	46	92	7	SP8	20782279	20786886	Sp8 transcription factor [Source:HGNC Symbol;Acc:HGNC:19196]	no	no	no	no
ENSG00000165156	46	92	8	ZHX1	123248451	123275541	zinc fingers and homeoboxes 1 [Source:HGNC Symbol;Acc:HGNC:12871]	no	no	no	no
ENSG00000168071	46	92	11	CCDC88B	64340204	64357534	coiled-coil domain containing 88B [Source:HGNC Symbol;Acc:HGNC:26757]	no	no	no	no
ENSG00000174307	46	92	1	PHLDA3	201464278	201469237	pleckstrin homology like domain family A member 3 [Source:HGNC Symbol;Acc:HGNC:8934]	no	no	no	no
ENSG00000185633	46	92	12	NDUFA4L2	57234903	57240715	NDUFA4 mitochondrial complex associated like 2 [Source:HGNC Symbol;Acc:HGNC:29836]	no	no	no	no
ENSG00000198010	46	92	8	DLGAP2	737628	1708476	DLG associated protein 2 [Source:HGNC Symbol;Acc:HGNC:2906]	no	no	no	no
ENSG00000205746	46	92	16	PKD1P4	18334400	18352476	polycystin 1, transient receptor potential channel interacting pseudogene 4 [Source:HGNC Symbol;Acc:HGNC:30068]	no	no	no	no
ENSG00000213199	46	92	7	ASIC3	151048292	151052756	acid sensing ion channel subunit 3 [Source:HGNC Symbol;Acc:HGNC:101]	no	no	no	no
ENSG00000214106	46	92	7	PAXIP1-AS2	154928460	154952188	PAXIP1 antisense RNA 2 [Source:HGNC Symbol;Acc:HGNC:48958]	no	no	no	no
ENSG00000228613	46	92	2	ENSG00000228613	1546665	1620113	novel transcript	no	no	no	no
ENSG00000235961	46	92	X	PNMA6A	153072454	153075019	PNMA family member 6A [Source:HGNC Symbol;Acc:HGNC:28248]	no	no	no	no
ENSG00000241945	46	92	21	PWP2	44107373	44131181	PWP2 small subunit processome component [Source:HGNC Symbol;Acc:HGNC:9711]	no	no	no	no
ENSG00000244486	46	92	22	SCARF2	20424584	20437826	scavenger receptor class F member 2 [Source:HGNC Symbol;Acc:HGNC:19869]	no	no	no	no
ENSG00000249898	46	92	8	MCPH1-AS1	6617310	6708224	MCPH1 antisense RNA 1 [Source:HGNC Symbol;Acc:HGNC:51655]	no	no	no	no
ENSG00000258636	46	92	14	LRFN5-DT	41583657	41604988	LRFN5 divergent transcript [Source:HGNC Symbol;Acc:HGNC:55444]	no	no	no	no
ENSG00000259972	46	92	16	ENSG00000259972	74305127	74335346	novel transcript, antisense to PSMD7	no	no	no	no
ENSG00000265194	46	92	9	ENSG00000265194	21858910	21861926	novel transcript, antisense MTAP	no	no	no	no
ENSG00000269981	46	92	1	ENSG00000269981	137682	137965	novel pseudogene	no	no	no	no
ENSG00000279348	46	92	2	ENSG00000279348	216211404	216213519	TEC	no	no	no	no
ENSG00000280303	46	92	8	ERICD	140636281	140638283	E2F1-regulated inhibitor of cell death [Source:HGNC Symbol;Acc:HGNC:49404]	no	no	no	no
ENSG00000287901	46	92	10	ENSG00000287901	44296805	44310237	novel transcript	no	no	no	no
ENSG00000049239	46	92	1	H6PD	9234774	9271337	hexose-6-phosphate dehydrogenase/glucose 1-dehydrogenase [Source:HGNC Symbol;Acc:HGNC:4795]	no	no	no	no
ENSG00000080224	46	92	3	EPHA6	96814581	97761532	EPH receptor A6 [Source:HGNC Symbol;Acc:HGNC:19296]	no	no	no	no
ENSG00000095932	45	90	19	SMIM24	3473986	3480525	small integral membrane protein 24 [Source:HGNC Symbol;Acc:HGNC:37244]	no	no	no	no
ENSG00000100473	45	90	14	COCH	30874514	30895065	cochlin [Source:HGNC Symbol;Acc:HGNC:2180]	no	no	no	no
ENSG00000105327	45	90	19	BBC3	47220822	47232766	BCL2 binding component 3 [Source:HGNC Symbol;Acc:HGNC:17868]	no	no	no	no
ENSG00000113273	45	90	5	ARSB	78777209	78986087	arylsulfatase B [Source:HGNC Symbol;Acc:HGNC:714]	no	no	no	no
ENSG00000123358	45	90	12	NR4A1	52022832	52059507	nuclear receptor subfamily 4 group A member 1 [Source:HGNC Symbol;Acc:HGNC:7980]	no	no	no	no
ENSG00000123384	45	90	12	LRP1	57128483	57213361	LDL receptor related protein 1 [Source:HGNC Symbol;Acc:HGNC:6692]	no	no	no	no
ENSG00000123552	45	90	6	USP45	99432325	99521728	ubiquitin specific peptidase 45 [Source:HGNC Symbol;Acc:HGNC:20080]	no	no	no	no
ENSG00000124302	45	90	19	CHST8	33621953	33773509	carbohydrate sulfotransferase 8 [Source:HGNC Symbol;Acc:HGNC:15993]	no	no	no	no
ENSG00000129566	45	90	14	TEP1	20365667	20413501	telomerase associated protein 1 [Source:HGNC Symbol;Acc:HGNC:11726]	no	no	no	no
ENSG00000130052	45	90	X	STARD8	68647666	68725842	StAR related lipid transfer domain containing 8 [Source:HGNC Symbol;Acc:HGNC:19161]	no	no	no	yes
ENSG00000134107	45	90	3	BHLHE40	4979437	4985323	basic helix-loop-helix family member e40 [Source:HGNC Symbol;Acc:HGNC:1046]	no	no	no	no
ENSG00000134595	45	90	X	SOX3	140502985	140505069	SRY-box transcription factor 3 [Source:HGNC Symbol;Acc:HGNC:11199]	no	no	no	no
ENSG00000135480	45	90	12	KRT7	52232520	52252186	keratin 7 [Source:HGNC Symbol;Acc:HGNC:6445]	no	no	no	no
ENSG00000139219	45	90	12	COL2A1	47972967	48004554	collagen type II alpha 1 chain [Source:HGNC Symbol;Acc:HGNC:2200]	no	no	no	no
ENSG00000151651	45	90	10	ADAM8	133262420	133276868	ADAM metallopeptidase domain 8 [Source:HGNC Symbol;Acc:HGNC:215]	no	no	no	no
ENSG00000151882	45	90	5	CCL28	43376645	43412391	C-C motif chemokine ligand 28 [Source:HGNC Symbol;Acc:HGNC:17700]	no	no	no	no
ENSG00000160588	45	90	11	MPZL3	118226690	118252365	myelin protein zero like 3 [Source:HGNC Symbol;Acc:HGNC:27279]	no	no	no	no
ENSG00000162576	45	90	1	MXRA8	1352689	1361777	matrix remodeling associated 8 [Source:HGNC Symbol;Acc:HGNC:7542]	no	no	no	no
ENSG00000165028	45	90	9	NIPSNAP3B	104764129	104777764	nipsnap homolog 3B [Source:HGNC Symbol;Acc:HGNC:23641]	no	no	no	no
ENSG00000165300	45	90	13	SLITRK5	87671371	87696272	SLIT and NTRK like family member 5 [Source:HGNC Symbol;Acc:HGNC:20295]	no	no	no	no
ENSG00000165879	45	90	10	FRAT1	97319271	97321915	FRAT regulator of WNT signaling pathway 1 [Source:HGNC Symbol;Acc:HGNC:3944]	no	no	no	no
ENSG00000166349	45	90	11	RAG1	36510372	36593156	recombination activating 1 [Source:HGNC Symbol;Acc:HGNC:9831]	no	no	no	no
ENSG00000168748	45	90	16	CA7	66844414	66854153	carbonic anhydrase 7 [Source:HGNC Symbol;Acc:HGNC:1381]	no	no	no	no
ENSG00000170074	45	90	5	FAM153A	177707981	177784435	family with sequence similarity 153 member A [Source:HGNC Symbol;Acc:HGNC:29940]	no	no	no	no
ENSG00000183379	45	90	14	SYNDIG1L	74405894	74426210	synapse differentiation inducing 1 like [Source:HGNC Symbol;Acc:HGNC:32388]	no	no	no	no
ENSG00000196557	45	90	16	CACNA1H	1153106	1221771	calcium voltage-gated channel subunit alpha1 H [Source:HGNC Symbol;Acc:HGNC:1395]	no	no	no	no
ENSG00000196776	45	90	3	CD47	108043091	108091862	CD47 molecule [Source:HGNC Symbol;Acc:HGNC:1682]	no	no	no	no
ENSG00000197467	45	90	10	COL13A1	69801880	69964275	collagen type XIII alpha 1 chain [Source:HGNC Symbol;Acc:HGNC:2190]	no	no	no	no
ENSG00000198221	45	90	6	AFDN-DT	167822103	167826833	AFDN divergent transcript [Source:HGNC Symbol;Acc:HGNC:21236]	no	no	no	no
ENSG00000198692	45	90	Y	EIF1AY	20575776	20593154	eukaryotic translation initiation factor 1A Y-linked [Source:HGNC Symbol;Acc:HGNC:3252]	no	no	no	no
ENSG00000227388	45	90	9	ENSG00000227388	35772163	35790432	novel transcript	no	no	no	no
ENSG00000230551	45	90	5	ENSG00000230551	149494314	149504670	novel transcript	no	no	no	no
ENSG00000244687	45	90	20	UBE2V1	50081124	50115959	ubiquitin conjugating enzyme E2 V1 [Source:HGNC Symbol;Acc:HGNC:12494]	no	no	no	no
ENSG00000246263	45	90	8	UBR5-DT	102239386	102253750	UBR5 divergent transcript [Source:HGNC Symbol;Acc:HGNC:51661]	no	no	no	no
ENSG00000249790	45	90	12	LINC02972	8788253	8795789	long intergenic non-protein coding RNA 2972 [Source:HGNC Symbol;Acc:HGNC:56013]	no	no	no	no
ENSG00000254277	45	90	8	ENSG00000254277	71675300	71756667	novel transcript	no	no	no	no
ENSG00000259479	45	90	15	SORD2P	44827060	44861850	sorbitol dehydrogenase 2, pseudogene [Source:HGNC Symbol;Acc:HGNC:49919]	no	no	no	no
ENSG00000278129	45	90	19	ZNF8	58278955	58302791	zinc finger protein 8 [Source:HGNC Symbol;Acc:HGNC:13154]	no	no	no	no
ENSG00000278616	45	90	10	BEND3P3	79682997	79685436	BEN domain containing 3 pseudogene 3 [Source:HGNC Symbol;Acc:HGNC:45016]	no	no	no	no
ENSG00000279342	45	90	11	ENSG00000279342	124789240	124792818	novel transcript, sense intronic to MSANTD2	no	no	no	no
ENSG00000279369	45	90	17	ENSG00000279369	63700847	63702670	TEC	no	no	no	no
ENSG00000279530	45	90	12	ENSG00000279530	70321542	70324274	TEC	no	no	no	no
ENSG00000196436	45	90	16	NPIPB15	74376306	74392115	nuclear pore complex interacting protein family member B15 [Source:HGNC Symbol;Acc:HGNC:34409]	no	no	no	no
ENSG00000286619	45	90	1	ENSG00000286619	205813322	205896082	novel transcript, antisense to PM20D1	no	no	no	no
ENSG00000002587	44	88	4	HS3ST1	11393150	11429564	heparan sulfate-glucosamine 3-sulfotransferase 1 [Source:HGNC Symbol;Acc:HGNC:5194]	no	no	no	no
ENSG00000018625	44	88	1	ATP1A2	160115759	160143591	ATPase Na+/K+ transporting subunit alpha 2 [Source:HGNC Symbol;Acc:HGNC:800]	no	no	no	no
ENSG00000033122	44	88	1	LRRC7	69567922	70151945	leucine rich repeat containing 7 [Source:HGNC Symbol;Acc:HGNC:18531]	no	no	no	no
ENSG00000039987	44	88	19	BEST2	12751702	12758458	bestrophin 2 [Source:HGNC Symbol;Acc:HGNC:17107]	no	no	no	no
ENSG00000066739	44	88	14	ATG2B	96279195	96363341	autophagy related 2B [Source:HGNC Symbol;Acc:HGNC:20187]	no	no	no	no
ENSG00000075388	44	88	11	FGF4	69771022	69775341	fibroblast growth factor 4 [Source:HGNC Symbol;Acc:HGNC:3682]	no	no	no	no
ENSG00000081803	44	88	7	CADPS2	122318411	122886759	calcium dependent secretion activator 2 [Source:HGNC Symbol;Acc:HGNC:16018]	no	no	no	no
ENSG00000088854	44	88	20	DNAAF9	3249306	3407669	dynein axonemal assembly factor 9 [Source:HGNC Symbol;Acc:HGNC:17721]	no	no	no	no
ENSG00000107242	44	88	9	PIP5K1B	68705240	69009176	phosphatidylinositol-4-phosphate 5-kinase type 1 beta [Source:HGNC Symbol;Acc:HGNC:8995]	no	no	no	no
ENSG00000112599	44	88	6	GUCA1B	42183284	42194956	guanylate cyclase activator 1B [Source:HGNC Symbol;Acc:HGNC:4679]	no	no	no	no
ENSG00000124942	44	88	11	AHNAK	62433542	62556235	AHNAK nucleoprotein [Source:HGNC Symbol;Acc:HGNC:347]	no	no	no	no
ENSG00000131467	44	88	17	PSME3	42824385	42843760	proteasome activator subunit 3 [Source:HGNC Symbol;Acc:HGNC:9570]	no	no	no	no
ENSG00000136235	44	88	7	GPNMB	23235967	23275108	glycoprotein nmb [Source:HGNC Symbol;Acc:HGNC:4462]	no	no	no	no
ENSG00000136279	44	88	7	DBNL	44044640	44069456	drebrin like [Source:HGNC Symbol;Acc:HGNC:2696]	no	no	no	no
ENSG00000138193	44	88	10	PLCE1	93993931	94332823	phospholipase C epsilon 1 [Source:HGNC Symbol;Acc:HGNC:17175]	no	no	no	no
ENSG00000141510	44	88	17	TP53	7661779	7687538	tumor protein p53 [Source:HGNC Symbol;Acc:HGNC:11998]	no	no	no	no
ENSG00000147119	44	88	X	CHST7	46573765	46598496	carbohydrate sulfotransferase 7 [Source:HGNC Symbol;Acc:HGNC:13817]	no	no	no	yes
ENSG00000148488	44	88	10	ST8SIA6	17315421	17454595	ST8 alpha-N-acetyl-neuraminide alpha-2,8-sialyltransferase 6 [Source:HGNC Symbol;Acc:HGNC:23317]	no	no	no	no
ENSG00000152128	44	88	2	TMEM163	134455759	134719000	transmembrane protein 163 [Source:HGNC Symbol;Acc:HGNC:25380]	no	no	no	no
ENSG00000153558	44	88	3	FBXL2	33277025	33403662	F-box and leucine rich repeat protein 2 [Source:HGNC Symbol;Acc:HGNC:13598]	no	no	no	no
ENSG00000153902	44	88	19	LGI4	35124513	35142451	leucine rich repeat LGI family member 4 [Source:HGNC Symbol;Acc:HGNC:18712]	no	no	no	no
ENSG00000157601	44	88	21	MX1	41420020	41470071	MX dynamin like GTPase 1 [Source:HGNC Symbol;Acc:HGNC:7532]	no	no	no	no
ENSG00000161960	44	88	17	EIF4A1	7572824	7579006	eukaryotic translation initiation factor 4A1 [Source:HGNC Symbol;Acc:HGNC:3282]	no	no	no	no
ENSG00000163531	44	88	1	NFASC	204828651	205022822	neurofascin [Source:HGNC Symbol;Acc:HGNC:29866]	no	no	no	no
ENSG00000164938	44	88	8	TP53INP1	94925972	94949378	tumor protein p53 inducible nuclear protein 1 [Source:HGNC Symbol;Acc:HGNC:18022]	no	no	no	no
ENSG00000167220	44	88	18	HDHD2	47107408	47150500	haloacid dehalogenase like hydrolase domain containing 2 [Source:HGNC Symbol;Acc:HGNC:25364]	no	no	no	no
ENSG00000167912	44	88	8	TOX-DT	59119040	59123478	TOX divergent transcript [Source:HGNC Symbol;Acc:HGNC:55935]	no	no	no	no
ENSG00000180229	44	88	15	HERC2P3	20431093	20505462	HERC2 pseudogene 3 [Source:HGNC Symbol;Acc:HGNC:4871]	no	no	no	no
ENSG00000180264	44	88	9	ADGRD2	124450451	124478589	adhesion G protein-coupled receptor D2 [Source:HGNC Symbol;Acc:HGNC:18651]	no	no	no	no
ENSG00000180447	44	88	9	GAS1	86944362	86947506	growth arrest specific 1 [Source:HGNC Symbol;Acc:HGNC:4165]	no	no	no	no
ENSG00000182600	44	88	2	SNORC	232857270	232878708	secondary ossification center associated regulator of chondrocyte maturation [Source:HGNC Symbol;Acc:HGNC:33763]	no	no	no	no
ENSG00000203362	44	88	6	POLH-AS1	43588230	43591362	POLH antisense RNA 1 [Source:HGNC Symbol;Acc:HGNC:40459]	no	no	no	no
ENSG00000204366	44	88	6	ZBTB12	31899613	31902086	zinc finger and BTB domain containing 12 [Source:HGNC Symbol;Acc:HGNC:19066]	no	no	no	no
ENSG00000229116	44	88	10	ENSG00000229116	44282489	44293998	novel transcript	no	no	no	no
ENSG00000249853	44	88	6	HS3ST5	114055596	114343023	heparan sulfate-glucosamine 3-sulfotransferase 5 [Source:HGNC Symbol;Acc:HGNC:19419]	no	no	no	no
ENSG00000263956	44	88	1	NBPF11	148102047	148152322	NBPF member 11 [Source:HGNC Symbol;Acc:HGNC:31993]	no	no	no	no
ENSG00000274422	44	88	22	ENSG00000274422	22283928	22287220	novel transcript	no	no	no	no
ENSG00000277196	44	88	KI270734.1	PRODH	138082	161852	proline dehydrogenase 1 [Source:HGNC Symbol;Acc:HGNC:9453]	no	no	no	no
ENSG00000286058	44	88	2	ENSG00000286058	130026845	130051131	novel transcript	no	no	no	no
ENSG00000132669	44	88	20	RIN2	19757606	20002457	Ras and Rab interactor 2 [Source:HGNC Symbol;Acc:HGNC:18750]	no	no	no	no
ENSG00000162231	44	88	11	NXF1	62792123	62806302	nuclear RNA export factor 1 [Source:HGNC Symbol;Acc:HGNC:8071]	no	no	no	no
ENSG00000164683	44	88	8	HEY1	79762371	79767857	hes related family bHLH transcription factor with YRPW motif 1 [Source:HGNC Symbol;Acc:HGNC:4880]	no	no	no	no
ENSG00000167178	44	88	15	ISLR2	74100311	74138540	immunoglobulin superfamily containing leucine rich repeat 2 [Source:HGNC Symbol;Acc:HGNC:29286]	no	no	no	no
ENSG00000188162	44	88	11	OTOG	17547259	17647150	otogelin [Source:HGNC Symbol;Acc:HGNC:8516]	no	no	no	no
ENSG00000189350	44	88	2	TOGARAM2	28956611	29052230	TOG array regulator of axonemal microtubules 2 [Source:HGNC Symbol;Acc:HGNC:33715]	no	no	no	no
ENSG00000204118	44	88	X	NAP1L6P	73126037	73128080	nucleosome assembly protein 1 like 6, pseudogene [Source:HGNC Symbol;Acc:HGNC:31706]	no	no	no	no
ENSG00000246465	44	88	16	ENSG00000246465	28284885	28292064	novel transcript LOC100506705	no	no	no	no
ENSG00000263513	44	88	1	FAM72C	143955287	143971986	family with sequence similarity 72 member C [Source:HGNC Symbol;Acc:HGNC:30602]	no	no	no	no
ENSG00000268460	44	88	19	ENSG00000268460	46201552	46214838	novel transcript	no	no	no	no
ENSG00000278987	44	88	16	ENSG00000278987	1688355	1690536	TEC	no	no	no	no
ENSG00000013293	43	86	3	SLC7A14	170459548	170586075	solute carrier family 7 member 14 [Source:HGNC Symbol;Acc:HGNC:29326]	no	no	no	no
ENSG00000047634	43	86	X	SCML1	17737449	17754988	Scm polycomb group protein like 1 [Source:HGNC Symbol;Acc:HGNC:10580]	no	no	no	yes
ENSG00000055609	43	86	7	KMT2C	152134922	152436644	lysine methyltransferase 2C [Source:HGNC Symbol;Acc:HGNC:13726]	no	no	no	no
ENSG00000059804	43	86	12	SLC2A3	7919230	7936187	solute carrier family 2 member 3 [Source:HGNC Symbol;Acc:HGNC:11007]	no	no	no	no
ENSG00000069493	43	86	12	CLEC2D	9664969	9699553	C-type lectin domain family 2 member D [Source:HGNC Symbol;Acc:HGNC:14351]	no	no	no	no
ENSG00000075275	43	86	22	CELSR1	46360834	46537620	cadherin EGF LAG seven-pass G-type receptor 1 [Source:HGNC Symbol;Acc:HGNC:1850]	no	no	no	no
ENSG00000090932	43	86	19	DLL3	39498895	39508481	delta like canonical Notch ligand 3 [Source:HGNC Symbol;Acc:HGNC:2909]	no	no	no	no
ENSG00000100296	43	86	22	THOC5	29505879	29555216	THO complex subunit 5 [Source:HGNC Symbol;Acc:HGNC:19074]	no	no	no	no
ENSG00000101850	43	86	X	GPR143	9725346	9786297	G protein-coupled receptor 143 [Source:HGNC Symbol;Acc:HGNC:20145]	no	no	yes	no
ENSG00000116984	43	86	1	MTR	236795260	236921278	5-methyltetrahydrofolate-homocysteine methyltransferase [Source:HGNC Symbol;Acc:HGNC:7468]	no	no	no	no
ENSG00000124762	43	86	6	CDKN1A	36676460	36687337	cyclin dependent kinase inhibitor 1A [Source:HGNC Symbol;Acc:HGNC:1784]	no	no	no	no
ENSG00000130045	43	86	9	NXNL2	88534033	88584274	nucleoredoxin like 2 [Source:HGNC Symbol;Acc:HGNC:30482]	no	no	no	no
ENSG00000133488	43	86	22	SEC14L4	30488902	30505711	SEC14 like lipid binding 4 [Source:HGNC Symbol;Acc:HGNC:20627]	no	no	no	no
ENSG00000137501	43	86	11	SYTL2	85694224	85811159	synaptotagmin like 2 [Source:HGNC Symbol;Acc:HGNC:15585]	no	no	no	no
ENSG00000138468	43	86	3	SENP7	101324205	101513241	SUMO specific peptidase 7 [Source:HGNC Symbol;Acc:HGNC:30402]	no	no	no	no
ENSG00000143369	43	86	1	ECM1	150508062	150513789	extracellular matrix protein 1 [Source:HGNC Symbol;Acc:HGNC:3153]	no	no	no	no
ENSG00000150551	43	86	2	LYPD1	132643286	132671579	LY6/PLAUR domain containing 1 [Source:HGNC Symbol;Acc:HGNC:28431]	no	no	no	no
ENSG00000152332	43	86	1	UHMK1	162497251	162529631	U2AF homology motif kinase 1 [Source:HGNC Symbol;Acc:HGNC:19683]	no	no	no	no
ENSG00000152818	43	86	6	UTRN	144285335	144853034	utrophin [Source:HGNC Symbol;Acc:HGNC:12635]	no	no	no	no
ENSG00000158023	43	86	12	CFAP251	121918592	122003927	cilia and flagella associated protein 251 [Source:HGNC Symbol;Acc:HGNC:28506]	no	no	no	no
ENSG00000159884	43	86	9	CCDC107	35658290	35661511	coiled-coil domain containing 107 [Source:HGNC Symbol;Acc:HGNC:28465]	no	no	no	no
ENSG00000166183	43	86	14	ASPG	104085686	104115582	asparaginase [Source:HGNC Symbol;Acc:HGNC:20123]	no	no	no	no
ENSG00000171435	43	86	12	KSR2	117453012	117968990	kinase suppressor of ras 2 [Source:HGNC Symbol;Acc:HGNC:18610]	no	no	no	no
ENSG00000175106	43	86	17	TVP23C	15502264	15563595	trans-golgi network vesicle protein 23 homolog C [Source:HGNC Symbol;Acc:HGNC:30453]	no	no	no	no
ENSG00000196668	43	86	12	LINC00173	116533422	116536518	long intergenic non-protein coding RNA 173 [Source:HGNC Symbol;Acc:HGNC:33791]	no	no	no	no
ENSG00000198625	43	86	1	MDM4	204516379	204558120	MDM4 regulator of p53 [Source:HGNC Symbol;Acc:HGNC:6974]	no	no	no	no
ENSG00000204632	43	86	6	HLA-G	29826967	29831125	major histocompatibility complex, class I, G [Source:HGNC Symbol;Acc:HGNC:4964]	no	no	no	no
ENSG00000226816	43	86	7	ENSG00000226816	23205787	23208045	novel transcript	no	no	no	no
ENSG00000232931	43	86	2	LINC00342	95807052	95835003	long intergenic non-protein coding RNA 342 [Source:HGNC Symbol;Acc:HGNC:42470]	no	no	no	no
ENSG00000236682	43	86	2	MAP3K2-DT	127388173	127406228	MAP3K2 divergent transcript [Source:HGNC Symbol;Acc:HGNC:54088]	no	no	no	no
ENSG00000246695	43	86	12	RASSF8-AS1	25936683	25959765	RASSF8 antisense RNA 1 [Source:HGNC Symbol;Acc:HGNC:48637]	no	no	no	no
ENSG00000267432	43	86	17	DNAH17-AS1	78484882	78503056	DNAH17 antisense RNA 1 [Source:HGNC Symbol;Acc:HGNC:48594]	no	no	no	no
ENSG00000272462	43	86	6	LINC02980	25992641	26001775	long intergenic non-protein coding RNA 2980 [Source:HGNC Symbol;Acc:HGNC:56046]	no	no	no	no
ENSG00000275481	43	86	12	ENSG00000275481	46388856	46392126	novel transcript	no	no	no	no
ENSG00000285813	43	86	11	ENSG00000285813	105995185	105999213	novel transcript, antisense to MSANTD4	no	no	no	no
ENSG00000286067	43	86	12	ENSG00000286067	120218070	120222668	novel transcript, antisense to PXN	no	no	no	no
ENSG00000286279	43	86	12	ENSG00000286279	59322745	59436874	novel transcript	no	no	no	no
ENSG00000287830	43	86	16	ENSG00000287830	9808856	9810726	novel transcript, antisense to GRIN2A	no	no	no	no
ENSG00000157303	43	86	9	SUSD3	93058688	93085133	sushi domain containing 3 [Source:HGNC Symbol;Acc:HGNC:28391]	no	no	no	no
ENSG00000197753	43	86	6	LHFPL5	35797206	35845397	LHFPL tetraspan subfamily member 5 [Source:HGNC Symbol;Acc:HGNC:21253]	no	no	no	no
ENSG00000048707	42	84	1	VPS13D	12230030	12512047	vacuolar protein sorting 13 homolog D [Source:HGNC Symbol;Acc:HGNC:23595]	no	no	no	no
ENSG00000073910	42	84	13	FRY	31846713	32299125	FRY microtubule binding protein [Source:HGNC Symbol;Acc:HGNC:20367]	no	no	no	no
ENSG00000082482	42	84	1	KCNK2	215005775	215237090	potassium two pore domain channel subfamily K member 2 [Source:HGNC Symbol;Acc:HGNC:6277]	no	no	no	no
ENSG00000093072	42	84	22	ADA2	17178790	17258235	adenosine deaminase 2 [Source:HGNC Symbol;Acc:HGNC:1839]	no	no	no	no
ENSG00000104177	42	84	15	MYEF2	48134632	48178353	myelin expression factor 2 [Source:HGNC Symbol;Acc:HGNC:17940]	no	no	no	no
ENSG00000108256	42	84	17	NUFIP2	29255839	29294148	nuclear FMR1 interacting protein 2 [Source:HGNC Symbol;Acc:HGNC:17634]	no	no	no	no
ENSG00000116539	42	84	1	ASH1L	155335268	155563162	ASH1 like histone lysine methyltransferase [Source:HGNC Symbol;Acc:HGNC:19088]	no	no	no	no
ENSG00000126217	42	84	13	MCF2L	112894378	113099742	MCF.2 cell line derived transforming sequence like [Source:HGNC Symbol;Acc:HGNC:14576]	no	no	no	no
ENSG00000130829	42	84	X	DUSP9	153642492	153651326	dual specificity phosphatase 9 [Source:HGNC Symbol;Acc:HGNC:3076]	no	no	no	yes
ENSG00000133710	42	84	5	SPINK5	148025683	148137382	serine peptidase inhibitor Kazal type 5 [Source:HGNC Symbol;Acc:HGNC:15464]	no	no	no	no
ENSG00000143545	42	84	1	RAB13	153981617	153986358	RAB13, member RAS oncogene family [Source:HGNC Symbol;Acc:HGNC:9762]	no	no	no	no
ENSG00000144893	42	84	3	MED12L	151085286	151437072	mediator complex subunit 12L [Source:HGNC Symbol;Acc:HGNC:16050]	no	no	no	no
ENSG00000156395	42	84	10	SORCS3	104641290	105265242	sortilin related VPS10 domain containing receptor 3 [Source:HGNC Symbol;Acc:HGNC:16699]	no	no	no	no
ENSG00000159720	42	84	16	ATP6V0D1	67438014	67481181	ATPase H+ transporting V0 subunit d1 [Source:HGNC Symbol;Acc:HGNC:13724]	no	no	no	no
ENSG00000164430	42	84	6	CGAS	73413515	73452297	cyclic GMP-AMP synthase [Source:HGNC Symbol;Acc:HGNC:21367]	no	no	no	no
ENSG00000166167	42	84	10	BTRC	101354033	101557321	beta-transducin repeat containing E3 ubiquitin protein ligase [Source:HGNC Symbol;Acc:HGNC:1144]	no	no	no	no
ENSG00000167754	42	84	19	KLK5	50943303	50953093	kallikrein related peptidase 5 [Source:HGNC Symbol;Acc:HGNC:6366]	no	no	no	no
ENSG00000182132	42	84	5	KCNIP1	170353487	170736632	potassium voltage-gated channel interacting protein 1 [Source:HGNC Symbol;Acc:HGNC:15521]	no	no	no	no
ENSG00000188770	42	84	1	OPTC	203494153	203508949	opticin [Source:HGNC Symbol;Acc:HGNC:8158]	no	no	no	no
ENSG00000189334	42	84	1	S100A14	153614255	153616986	S100 calcium binding protein A14 [Source:HGNC Symbol;Acc:HGNC:18901]	no	no	no	no
ENSG00000196932	42	84	10	TMEM26	61406642	61453381	transmembrane protein 26 [Source:HGNC Symbol;Acc:HGNC:28550]	no	no	no	no
ENSG00000198890	42	84	1	PRMT6	107056674	107067636	protein arginine methyltransferase 6 [Source:HGNC Symbol;Acc:HGNC:18241]	no	no	no	no
ENSG00000203499	42	84	8	IQANK1	143734139	143790645	IQ motif and ankyrin repeat containing 1 [Source:HGNC Symbol;Acc:HGNC:49576]	no	no	no	no
ENSG00000203999	42	84	20	LINC01270	50292709	50315488	long intergenic non-protein coding RNA 1270 [Source:HGNC Symbol;Acc:HGNC:27658]	no	no	no	no
ENSG00000204054	42	84	9	LINC00963	129476946	129513687	long intergenic non-protein coding RNA 963 [Source:HGNC Symbol;Acc:HGNC:48716]	no	no	no	no
ENSG00000205730	42	84	16	ITPRIPL2	19113932	19121629	ITPRIP like 2 [Source:HGNC Symbol;Acc:HGNC:27257]	no	no	no	no
ENSG00000225465	42	84	22	RFPL1S	29436534	29478868	RFPL1 antisense RNA 1 [Source:HGNC Symbol;Acc:HGNC:9978]	no	no	no	no
ENSG00000233175	42	84	17	FMNL1-AS1	45238028	45241734	FMNL1 antisense RNA 1 [Source:HGNC Symbol;Acc:HGNC:55717]	no	no	no	no
ENSG00000243302	42	84	7	ENSG00000243302	128651185	128652334	novel pseudogene	no	no	no	no
ENSG00000256417	42	84	12	ENSG00000256417	5290480	5383653	novel transcript	no	no	no	no
ENSG00000257474	42	84	12	ENSG00000257474	79540203	79550535	novel transcript	no	no	no	no
ENSG00000258545	42	84	X	RHOXF1-AS1	120036236	120146855	RHOXF1 antisense RNA 1 [Source:HGNC Symbol;Acc:HGNC:51582]	no	no	no	no
ENSG00000263968	42	84	16	RN7SL381P	85659378	85659675	RNA, 7SL, cytoplasmic 381, pseudogene [Source:HGNC Symbol;Acc:HGNC:46397]	no	no	no	no
ENSG00000266714	42	84	17	MYO15B	75587800	75626849	myosin XVB [Source:HGNC Symbol;Acc:HGNC:14083]	no	no	no	no
ENSG00000273314	42	84	7	ENSG00000273314	148696467	148698664	novel transcript, antisense to CUL1	no	no	no	no
ENSG00000280287	42	84	12	ENSG00000280287	132550729	132554947	novel transcript	no	no	no	no
ENSG00000286360	42	84	2	ENSG00000286360	61878940	61881353	novel transcript, antisense to CCT4	no	no	no	no
ENSG00000287202	42	84	12	ENSG00000287202	108532074	108539738	novel transcript, antisense to SART3	no	no	no	no
ENSG00000110090	42	84	11	CPT1A	68754620	68844410	carnitine palmitoyltransferase 1A [Source:HGNC Symbol;Acc:HGNC:2328]	no	no	no	no
ENSG00000100523	41	82	14	DDHD1	53036745	53153323	DDHD domain containing 1 [Source:HGNC Symbol;Acc:HGNC:19714]	no	no	no	no
ENSG00000101194	41	82	20	SLC17A9	62952707	62969585	solute carrier family 17 member 9 [Source:HGNC Symbol;Acc:HGNC:16192]	no	no	no	no
ENSG00000118596	41	82	12	SLC16A7	59596029	59789855	solute carrier family 16 member 7 [Source:HGNC Symbol;Acc:HGNC:10928]	no	no	no	no
ENSG00000124370	41	82	2	MCEE	71109684	71130239	methylmalonyl-CoA epimerase [Source:HGNC Symbol;Acc:HGNC:16732]	no	no	no	no
ENSG00000125843	41	82	20	AP5S1	3820524	3828838	adaptor related protein complex 5 subunit sigma 1 [Source:HGNC Symbol;Acc:HGNC:15875]	no	no	no	no
ENSG00000128242	41	82	22	GAL3ST1	30554635	30574665	galactose-3-O-sulfotransferase 1 [Source:HGNC Symbol;Acc:HGNC:24240]	no	no	no	no
ENSG00000137496	41	82	11	IL18BP	71998613	72007315	interleukin 18 binding protein [Source:HGNC Symbol;Acc:HGNC:5987]	no	no	no	no
ENSG00000141736	41	82	17	ERBB2	39687914	39730426	erb-b2 receptor tyrosine kinase 2 [Source:HGNC Symbol;Acc:HGNC:3430]	no	no	no	no
ENSG00000149451	41	82	20	ADAM33	3667965	3682246	ADAM metallopeptidase domain 33 [Source:HGNC Symbol;Acc:HGNC:15478]	no	no	no	no
ENSG00000151690	41	82	2	MFSD6	190408355	190509205	major facilitator superfamily domain containing 6 [Source:HGNC Symbol;Acc:HGNC:24711]	no	no	no	no
ENSG00000152256	41	82	2	PDK1	172555373	172608669	pyruvate dehydrogenase kinase 1 [Source:HGNC Symbol;Acc:HGNC:8809]	no	no	no	no
ENSG00000158234	41	82	3	FAIM	138608606	138633376	Fas apoptotic inhibitory molecule [Source:HGNC Symbol;Acc:HGNC:18703]	no	no	no	no
ENSG00000163162	41	82	2	RNF149	101271219	101308701	ring finger protein 149 [Source:HGNC Symbol;Acc:HGNC:23137]	no	no	no	no
ENSG00000163840	41	82	3	DTX3L	122564338	122575203	deltex E3 ubiquitin ligase 3L [Source:HGNC Symbol;Acc:HGNC:30323]	no	no	no	no
ENSG00000165272	41	82	9	AQP3	33441156	33447596	aquaporin 3 (Gill blood group) [Source:HGNC Symbol;Acc:HGNC:636]	no	no	no	no
ENSG00000165868	41	82	10	HSPA12A	116671192	116850251	heat shock protein family A (Hsp70) member 12A [Source:HGNC Symbol;Acc:HGNC:19022]	no	no	no	no
ENSG00000165995	41	82	10	CACNB2	18140424	18543557	calcium voltage-gated channel auxiliary subunit beta 2 [Source:HGNC Symbol;Acc:HGNC:1402]	no	no	no	no
ENSG00000166333	41	82	11	ILK	6603708	6610874	integrin linked kinase [Source:HGNC Symbol;Acc:HGNC:6040]	no	no	no	no
ENSG00000166963	41	82	15	MAP1A	43510958	43531620	microtubule associated protein 1A [Source:HGNC Symbol;Acc:HGNC:6835]	no	no	no	no
ENSG00000168477	41	82	6	TNXB	32041153	32115334	tenascin XB [Source:HGNC Symbol;Acc:HGNC:11976]	no	no	no	no
ENSG00000170734	41	82	6	POLH	43576185	43620523	DNA polymerase eta [Source:HGNC Symbol;Acc:HGNC:9181]	no	no	no	no
ENSG00000170955	41	82	11	CAVIN3	6318946	6320532	caveolae associated protein 3 [Source:HGNC Symbol;Acc:HGNC:9400]	no	no	no	no
ENSG00000171121	41	82	3	KCNMB3	179236691	179267002	potassium calcium-activated channel subfamily M regulatory beta subunit 3 [Source:HGNC Symbol;Acc:HGNC:6287]	no	no	no	no
ENSG00000171956	41	82	15	FOXB1	60004234	60061730	forkhead box B1 [Source:HGNC Symbol;Acc:HGNC:3799]	no	no	no	no
ENSG00000172987	41	82	10	HPSE2	98457077	99235862	heparanase 2 (inactive) [Source:HGNC Symbol;Acc:HGNC:18374]	no	no	no	no
ENSG00000177628	41	82	1	GBA1	155234452	155244699	glucosylceramidase beta 1 [Source:HGNC Symbol;Acc:HGNC:4177]	no	no	no	no
ENSG00000178607	41	82	17	ERN1	64039080	64130819	endoplasmic reticulum to nucleus signaling 1 [Source:HGNC Symbol;Acc:HGNC:3449]	no	no	no	no
ENSG00000180628	41	82	10	PCGF5	91163012	91284337	polycomb group ring finger 5 [Source:HGNC Symbol;Acc:HGNC:28264]	no	no	no	no
ENSG00000182179	41	82	3	UBA7	49805209	49813953	ubiquitin like modifier activating enzyme 7 [Source:HGNC Symbol;Acc:HGNC:12471]	no	no	no	no
ENSG00000182324	41	82	19	KCNJ14	48455574	48466980	potassium inwardly rectifying channel subfamily J member 14 [Source:HGNC Symbol;Acc:HGNC:6260]	no	no	no	no
ENSG00000182484	41	82	X	WASH6P	156020826	156025710	WASP family homolog 6, pseudogene [Source:HGNC Symbol;Acc:HGNC:31685]	PAR2	no	no	no
ENSG00000183506	41	82	22	PI4KAP2	21473000	21517533	phosphatidylinositol 4-kinase alpha pseudogene 2 [Source:HGNC Symbol;Acc:HGNC:33577]	no	no	no	no
ENSG00000184302	41	82	14	SIX6	60509146	60512850	SIX homeobox 6 [Source:HGNC Symbol;Acc:HGNC:10892]	no	no	no	no
ENSG00000184731	41	82	2	FAM110C	38814	46870	family with sequence similarity 110 member C [Source:HGNC Symbol;Acc:HGNC:33340]	no	no	no	no
ENSG00000185477	41	82	4	GPRIN3	89236383	89307800	GPRIN family member 3 [Source:HGNC Symbol;Acc:HGNC:27733]	no	no	no	no
ENSG00000186409	41	82	1	CCDC30	42463221	42657190	coiled-coil domain containing 30 [Source:HGNC Symbol;Acc:HGNC:26103]	no	no	no	no
ENSG00000188897	41	82	16	ENSG00000188897	11359845	11527247	novel lipoprotein amino terminal region containing protein	no	no	no	no
ENSG00000197102	41	82	14	DYNC1H1	101964573	102056443	dynein cytoplasmic 1 heavy chain 1 [Source:HGNC Symbol;Acc:HGNC:2961]	no	no	no	no
ENSG00000197444	41	82	10	OGDHL	49734641	49762379	oxoglutarate dehydrogenase L [Source:HGNC Symbol;Acc:HGNC:25590]	no	no	no	no
ENSG00000204538	41	82	6	PSORS1C2	31137534	31139066	psoriasis susceptibility 1 candidate 2 [Source:HGNC Symbol;Acc:HGNC:17199]	no	no	no	no
ENSG00000204815	41	82	17	ODAD4	41930617	41966503	outer dynein arm docking complex subunit 4 [Source:HGNC Symbol;Acc:HGNC:25280]	no	no	no	no
ENSG00000214021	41	82	3	TTLL3	9808086	9855138	tubulin tyrosine ligase like 3 [Source:HGNC Symbol;Acc:HGNC:24483]	no	no	no	no
ENSG00000224664	41	82	X	RPL36AP53	114589620	114589935	ribosomal protein L36a pseudogene 53 [Source:HGNC Symbol;Acc:HGNC:36517]	no	no	no	no
ENSG00000231312	41	82	2	MAP4K3-DT	39436530	39665343	MAP4K3 divergent transcript [Source:HGNC Symbol;Acc:HGNC:54056]	no	no	no	no
ENSG00000238035	41	82	5	ENSG00000238035	181306502	181324685	novel transcript	no	no	no	no
ENSG00000248866	41	82	4	USP46-DT	52659406	52661668	USP46 divergent transcript [Source:HGNC Symbol;Acc:HGNC:43991]	no	no	no	no
ENSG00000250920	41	82	4	ENSG00000250920	103550586	103559277	novel transcript	no	no	no	no
ENSG00000255666	41	82	11	LINC02700	94638045	94652884	long intergenic non-protein coding RNA 2700 [Source:HGNC Symbol;Acc:HGNC:54214]	no	no	no	no
ENSG00000275895	41	82	21	ENSG00000275895	6484623	6499248	U2 small nuclear RNA auxiliary factor 1-like 5	no	no	no	no
ENSG00000286595	41	82	14	ENSG00000286595	48194174	48228216	novel transcript	no	no	no	no
ENSG00000124143	41	82	20	ARHGAP40	38601809	38651035	Rho GTPase activating protein 40 [Source:HGNC Symbol;Acc:HGNC:16226]	no	no	no	no
ENSG00000146530	41	82	7	VWDE	12330885	12403941	von Willebrand factor D and EGF domains [Source:HGNC Symbol;Acc:HGNC:21897]	no	no	no	no
ENSG00000160818	41	82	1	GPATCH4	156594301	156601496	G-patch domain containing 4 (gene/pseudogene) [Source:HGNC Symbol;Acc:HGNC:25982]	no	no	no	no
ENSG00000164398	41	82	5	ACSL6	131949973	132012243	acyl-CoA synthetase long chain family member 6 [Source:HGNC Symbol;Acc:HGNC:16496]	no	no	no	no
ENSG00000168255	41	82	7	POLR2J3	102537918	102572653	RNA polymerase II subunit J3 [Source:HGNC Symbol;Acc:HGNC:33853]	no	no	no	no
ENSG00000231793	41	82	11	DOC2GP	67612651	67616257	double C2 domain gamma, pseudogene [Source:HGNC Symbol;Acc:HGNC:37962]	no	no	no	no
ENSG00000251209	41	82	15	LINC00923	97572185	97875650	long intergenic non-protein coding RNA 923 [Source:HGNC Symbol;Acc:HGNC:28088]	no	no	no	no
ENSG00000008517	40	80	16	IL32	3065297	3082192	interleukin 32 [Source:HGNC Symbol;Acc:HGNC:16830]	no	no	no	no
ENSG00000043143	40	80	5	JADE2	134524312	134583230	jade family PHD finger 2 [Source:HGNC Symbol;Acc:HGNC:22984]	no	no	no	no
ENSG00000056487	40	80	22	PHF21B	44881162	45010005	PHD finger protein 21B [Source:HGNC Symbol;Acc:HGNC:25161]	no	no	no	no
ENSG00000065618	40	80	10	COL17A1	104031286	104085880	collagen type XVII alpha 1 chain [Source:HGNC Symbol;Acc:HGNC:2194]	no	no	no	no
ENSG00000100060	40	80	22	MFNG	37469063	37486393	MFNG O-fucosylpeptide 3-beta-N-acetylglucosaminyltransferase [Source:HGNC Symbol;Acc:HGNC:7038]	no	no	no	no
ENSG00000101846	40	80	X	STS	7147237	7804358	steroid sulfatase [Source:HGNC Symbol;Acc:HGNC:11425]	no	yes	no	no
ENSG00000104691	40	80	8	UBXN8	30729131	30767006	UBX domain protein 8 [Source:HGNC Symbol;Acc:HGNC:30307]	no	no	no	no
ENSG00000120332	40	80	1	TNN	175067833	175148075	tenascin N [Source:HGNC Symbol;Acc:HGNC:22942]	no	no	no	no
ENSG00000135070	40	80	9	ISCA1	86264546	86283102	iron-sulfur cluster assembly 1 [Source:HGNC Symbol;Acc:HGNC:28660]	no	no	no	no
ENSG00000140284	40	80	15	SLC27A2	50182196	50236385	solute carrier family 27 member 2 [Source:HGNC Symbol;Acc:HGNC:10996]	no	no	no	no
ENSG00000140835	40	80	16	CHST4	71525233	71538748	carbohydrate sulfotransferase 4 [Source:HGNC Symbol;Acc:HGNC:1972]	no	no	no	no
ENSG00000152779	40	80	10	SLC16A12	89430299	89556641	solute carrier family 16 member 12 [Source:HGNC Symbol;Acc:HGNC:23094]	no	no	no	no
ENSG00000153246	40	80	2	PLA2R1	159932006	160062615	phospholipase A2 receptor 1 [Source:HGNC Symbol;Acc:HGNC:9042]	no	no	no	no
ENSG00000167840	40	80	17	ZNF232	5105269	5123162	zinc finger protein 232 [Source:HGNC Symbol;Acc:HGNC:13026]	no	no	no	no
ENSG00000168062	40	80	11	BATF2	64987945	64997018	basic leucine zipper ATF-like transcription factor 2 [Source:HGNC Symbol;Acc:HGNC:25163]	no	no	no	no
ENSG00000169100	40	80	X	SLC25A6	1386152	1392113	solute carrier family 25 member 6 [Source:HGNC Symbol;Acc:HGNC:10992]	PAR1	no	no	no
ENSG00000169871	40	80	7	TRIM56	101085481	101097967	tripartite motif containing 56 [Source:HGNC Symbol;Acc:HGNC:19028]	no	no	no	no
ENSG00000176769	40	80	10	TCERG1L	131092391	131311721	transcription elongation regulator 1 like [Source:HGNC Symbol;Acc:HGNC:23533]	no	no	no	no
ENSG00000178038	40	80	3	ALS2CL	46668995	46693704	ALS2 C-terminal like [Source:HGNC Symbol;Acc:HGNC:20605]	no	no	no	no
ENSG00000187987	40	80	6	ZSCAN23	28431930	28443502	zinc finger and SCAN domain containing 23 [Source:HGNC Symbol;Acc:HGNC:21193]	no	no	no	no
ENSG00000197976	40	80	X	AKAP17A	1591604	1602520	A-kinase anchoring protein 17A [Source:HGNC Symbol;Acc:HGNC:18783]	PAR1	no	no	no
ENSG00000198198	40	80	1	SZT2	43389882	43454247	SZT2 subunit of KICSTOR complex [Source:HGNC Symbol;Acc:HGNC:29040]	no	no	no	no
ENSG00000213398	40	80	16	LCAT	67939750	67944131	lecithin-cholesterol acyltransferase [Source:HGNC Symbol;Acc:HGNC:6522]	no	no	no	no
ENSG00000215808	40	80	1	LINC01139	238476542	238486060	long intergenic non-protein coding RNA 1139 [Source:HGNC Symbol;Acc:HGNC:27924]	no	no	no	no
ENSG00000226648	40	80	20	PLCG1-AS1	41098019	41138003	PLCG1 antisense RNA 1 [Source:HGNC Symbol;Acc:HGNC:40450]	no	no	no	no
ENSG00000229692	40	80	2	SOS1-IT1	38992279	38993857	SOS1 intronic transcript 1 [Source:HGNC Symbol;Acc:HGNC:41385]	no	no	no	no
ENSG00000232442	40	80	20	MHENCR	63627179	63628824	melanoma highly expressed competing endogenous lncRNA for miR-425 and miR-489 [Source:HGNC Symbol;Acc:HGNC:53110]	no	no	no	no
ENSG00000239264	40	80	6	TXNDC5	7881517	7910788	thioredoxin domain containing 5 [Source:HGNC Symbol;Acc:HGNC:21073]	no	no	no	no
ENSG00000254275	40	80	8	LINC00824	128405269	128564679	long intergenic non-protein coding RNA 824 [Source:HGNC Symbol;Acc:HGNC:50281]	no	no	no	no
ENSG00000260563	40	80	17	ENSG00000260563	82293716	82294910	novel transcript	no	no	no	no
ENSG00000270184	40	80	16	ENSG00000270184	85784382	85787617	novel transcript, antisense to COX4NB	no	no	no	no
ENSG00000107021	40	80	9	TBC1D13	128787253	128810430	TBC1 domain family member 13 [Source:HGNC Symbol;Acc:HGNC:25571]	no	no	no	no
ENSG00000175395	40	80	10	ZNF25	37949573	37976647	zinc finger protein 25 [Source:HGNC Symbol;Acc:HGNC:13043]	no	no	no	no
ENSG00000186510	40	80	1	CLCNKA	16018875	16034050	chloride voltage-gated channel Ka [Source:HGNC Symbol;Acc:HGNC:2026]	no	no	no	no
ENSG00000225689	40	80	X	ENSG00000225689	128027322	129326707	novel transcript	no	no	no	no
ENSG00000278530	40	80	X	CHMP1B2P	80228489	80335364	charged multivesicular body protein 1B2, pseudogene [Source:HGNC Symbol;Acc:HGNC:49380]	no	no	no	no
ENSG00000081479	39	78	2	LRP2	169127109	169362534	LDL receptor related protein 2 [Source:HGNC Symbol;Acc:HGNC:6694]	no	no	no	no
ENSG00000083844	39	78	19	ZNF264	57191500	57222846	zinc finger protein 264 [Source:HGNC Symbol;Acc:HGNC:13057]	no	no	no	no
ENSG00000090530	39	78	3	P3H2	189956728	190122437	prolyl 3-hydroxylase 2 [Source:HGNC Symbol;Acc:HGNC:19317]	no	no	no	no
ENSG00000090615	39	78	12	GOLGA3	132768902	132829143	golgin A3 [Source:HGNC Symbol;Acc:HGNC:4426]	no	no	no	no
ENSG00000100985	39	78	20	MMP9	46008908	46016561	matrix metallopeptidase 9 [Source:HGNC Symbol;Acc:HGNC:7176]	no	no	no	no
ENSG00000102886	39	78	16	GDPD3	30104810	30113537	glycerophosphodiester phosphodiesterase domain containing 3 [Source:HGNC Symbol;Acc:HGNC:28638]	no	no	no	no
ENSG00000106261	39	78	7	ZKSCAN1	100015572	100041689	zinc finger with KRAB and SCAN domains 1 [Source:HGNC Symbol;Acc:HGNC:13101]	no	no	no	no
ENSG00000114805	39	78	3	PLCH1	155375580	155745071	phospholipase C eta 1 [Source:HGNC Symbol;Acc:HGNC:29185]	no	no	no	no
ENSG00000118007	39	78	3	STAG1	136336236	136752403	stromal antigen 1 [Source:HGNC Symbol;Acc:HGNC:11354]	no	no	no	no
ENSG00000118276	39	78	18	B4GALT6	31622246	31685836	beta-1,4-galactosyltransferase 6 [Source:HGNC Symbol;Acc:HGNC:929]	no	no	no	no
ENSG00000124019	39	78	2	FAM124B	224378698	224402107	family with sequence similarity 124 member B [Source:HGNC Symbol;Acc:HGNC:26224]	no	no	no	no
ENSG00000134574	39	78	11	DDB2	47214465	47239217	damage specific DNA binding protein 2 [Source:HGNC Symbol;Acc:HGNC:2718]	no	no	no	no
ENSG00000137776	39	78	15	SLTM	58879050	58933679	SAFB like transcription modulator [Source:HGNC Symbol;Acc:HGNC:20709]	no	no	no	no
ENSG00000146802	39	78	7	TMEM168	112762377	112790423	transmembrane protein 168 [Source:HGNC Symbol;Acc:HGNC:25826]	no	no	no	no
ENSG00000151131	39	78	12	NOPCHAP1	104986316	105074197	NOP protein chaperone 1 [Source:HGNC Symbol;Acc:HGNC:28628]	no	no	no	no
ENSG00000153291	39	78	6	SLC25A27	46652915	46678190	solute carrier family 25 member 27 [Source:HGNC Symbol;Acc:HGNC:21065]	no	no	no	no
ENSG00000163421	39	78	3	PROK2	71771655	71785206	prokineticin 2 [Source:HGNC Symbol;Acc:HGNC:18455]	no	no	no	no
ENSG00000163661	39	78	3	PTX3	157436850	157443633	pentraxin 3 [Source:HGNC Symbol;Acc:HGNC:9692]	no	no	no	no
ENSG00000164669	39	78	7	INTS4P1	65141241	65212794	integrator complex subunit 4 pseudogene 1 [Source:HGNC Symbol;Acc:HGNC:21925]	no	no	no	no
ENSG00000164741	39	78	8	DLC1	13083361	13604610	DLC1 Rho GTPase activating protein [Source:HGNC Symbol;Acc:HGNC:2897]	no	no	no	no
ENSG00000166033	39	78	10	HTRA1	122458551	122514907	HtrA serine peptidase 1 [Source:HGNC Symbol;Acc:HGNC:9476]	no	no	no	no
ENSG00000170381	39	78	7	SEMA3E	83363238	83649139	semaphorin 3E [Source:HGNC Symbol;Acc:HGNC:10727]	no	no	no	no
ENSG00000174740	39	78	X	PABPC5	91434595	91438584	poly(A) binding protein cytoplasmic 5 [Source:HGNC Symbol;Acc:HGNC:13629]	no	no	no	no
ENSG00000196696	39	78	16	ENSG00000196696	69976297	70065948	PDXDC2P-NPIPB14P readthrough [Source:NCBI gene (formerly Entrezgene);Acc:283970]	no	no	no	no
ENSG00000196712	39	78	17	NF1	31094927	31382116	neurofibromin 1 [Source:HGNC Symbol;Acc:HGNC:7765]	no	no	no	no
ENSG00000198482	39	78	19	ZNF808	52527652	52564464	zinc finger protein 808 [Source:HGNC Symbol;Acc:HGNC:33230]	no	no	no	no
ENSG00000198753	39	78	X	PLXNB3	153764196	153779346	plexin B3 [Source:HGNC Symbol;Acc:HGNC:9105]	no	yes	no	no
ENSG00000205212	39	78	17	CCDC144NL	20893392	20896020	CCDC144A N-terminal pseudogene [Source:HGNC Symbol;Acc:HGNC:33735]	no	no	no	no
ENSG00000241860	39	78	1	ENSG00000241860	141474	173862	novel transcript	no	no	no	no
ENSG00000245532	39	78	11	NEAT1	65422774	65445540	nuclear paraspeckle assembly transcript 1 [Source:HGNC Symbol;Acc:HGNC:30815]	no	no	no	no
ENSG00000257027	39	78	12	ENSG00000257027	9658567	9662085	novel transcript	no	no	no	no
ENSG00000261456	39	78	10	TUBB8	46888	74163	tubulin beta 8 class VIII [Source:HGNC Symbol;Acc:HGNC:20773]	no	no	no	no
ENSG00000263786	39	78	17	ENSG00000263786	75145261	75146546	novel transcript, sense intronic to HN1	no	no	no	no
ENSG00000035664	39	78	15	DAPK2	63907036	64072033	death associated protein kinase 2 [Source:HGNC Symbol;Acc:HGNC:2675]	no	no	no	no
ENSG00000103888	39	78	15	CEMIP	80779343	80951776	cell migration inducing hyaluronidase 1 [Source:HGNC Symbol;Acc:HGNC:29213]	no	no	no	no
ENSG00000125814	39	78	20	NAPB	23374519	23421519	NSF attachment protein beta [Source:HGNC Symbol;Acc:HGNC:15751]	no	no	no	no
ENSG00000135248	39	78	7	GARIN1B	128709061	128731743	golgi associated RAB2 interactor 1B [Source:HGNC Symbol;Acc:HGNC:30704]	no	no	no	no
ENSG00000153303	39	78	6	FRMD1	168053095	168101511	FERM domain containing 1 [Source:HGNC Symbol;Acc:HGNC:21240]	no	no	no	no
ENSG00000183935	39	78	12	HTR7P1	13000420	13004830	5-hydroxytryptamine receptor 7 pseudogene 1 [Source:HGNC Symbol;Acc:HGNC:30411]	no	no	no	no
ENSG00000196767	39	78	X	POU3F4	83508290	83512127	POU class 3 homeobox 4 [Source:HGNC Symbol;Acc:HGNC:9217]	no	no	no	no
ENSG00000057935	38	76	2	MTA3	42494569	42756947	metastasis associated 1 family member 3 [Source:HGNC Symbol;Acc:HGNC:23784]	no	no	no	no
ENSG00000078687	38	76	17	TNRC6C	77958703	78108822	trinucleotide repeat containing adaptor 6C [Source:HGNC Symbol;Acc:HGNC:29318]	no	no	no	no
ENSG00000090612	38	76	12	ZNF268	133181409	133214832	zinc finger protein 268 [Source:HGNC Symbol;Acc:HGNC:13061]	no	no	no	no
ENSG00000104447	38	76	8	TRPS1	115408496	115809673	transcriptional repressor GATA binding 1 [Source:HGNC Symbol;Acc:HGNC:12340]	no	no	no	no
ENSG00000104524	38	76	8	PYCR3	143603210	143609773	pyrroline-5-carboxylate reductase 3 [Source:HGNC Symbol;Acc:HGNC:25846]	no	no	no	no
ENSG00000105499	38	76	19	PLA2G4C	48047843	48110817	phospholipase A2 group IVC [Source:HGNC Symbol;Acc:HGNC:9037]	no	no	no	no
ENSG00000110237	38	76	11	ARHGEF17	73308276	73369388	Rho guanine nucleotide exchange factor 17 [Source:HGNC Symbol;Acc:HGNC:21726]	no	no	no	no
ENSG00000112539	38	76	6	C6orf118	165279664	165309605	chromosome 6 open reading frame 118 [Source:HGNC Symbol;Acc:HGNC:21233]	no	no	no	no
ENSG00000114656	38	76	3	CFAP92	128909866	129002690	cilia and flagella associated protein 92 (putative) [Source:HGNC Symbol;Acc:HGNC:29231]	no	no	no	no
ENSG00000125285	38	76	13	SOX21	94709622	94712545	SRY-box transcription factor 21 [Source:HGNC Symbol;Acc:HGNC:11197]	no	no	no	no
ENSG00000127720	38	76	12	METTL25	82358528	82479239	methyltransferase like 25 [Source:HGNC Symbol;Acc:HGNC:26228]	no	no	no	no
ENSG00000129451	38	76	19	KLK10	51012739	51020175	kallikrein related peptidase 10 [Source:HGNC Symbol;Acc:HGNC:6358]	no	no	no	no
ENSG00000134202	38	76	1	GSTM3	109733932	109741038	glutathione S-transferase mu 3 [Source:HGNC Symbol;Acc:HGNC:4635]	no	no	no	no
ENSG00000134324	38	76	2	LPIN1	11677595	11827409	lipin 1 [Source:HGNC Symbol;Acc:HGNC:13345]	no	no	no	no
ENSG00000135423	38	76	12	GLS2	56470944	56488414	glutaminase 2 [Source:HGNC Symbol;Acc:HGNC:29570]	no	no	no	no
ENSG00000140470	38	76	15	ADAMTS17	99971437	100342005	ADAM metallopeptidase with thrombospondin type 1 motif 17 [Source:HGNC Symbol;Acc:HGNC:17109]	no	no	no	no
ENSG00000164362	38	76	5	TERT	1253147	1295068	telomerase reverse transcriptase [Source:HGNC Symbol;Acc:HGNC:11730]	no	no	no	no
ENSG00000169291	38	76	1	SHE	154469772	154502412	Src homology 2 domain containing E [Source:HGNC Symbol;Acc:HGNC:27004]	no	no	no	no
ENSG00000170373	38	76	20	CST1	23747562	23751268	cystatin SN [Source:HGNC Symbol;Acc:HGNC:2473]	no	no	no	no
ENSG00000170919	38	76	13	TPT1-AS1	45341345	45417975	TPT1 antisense RNA 1 [Source:HGNC Symbol;Acc:HGNC:43686]	no	no	no	no
ENSG00000171174	38	76	2	RBKS	27781379	27890681	ribokinase [Source:HGNC Symbol;Acc:HGNC:30325]	no	no	no	no
ENSG00000174136	38	76	5	RGMB	98768650	98798643	repulsive guidance molecule BMP co-receptor b [Source:HGNC Symbol;Acc:HGNC:26896]	no	no	no	no
ENSG00000176809	38	76	17	LRRC37A3	64854130	64919480	leucine rich repeat containing 37 member A3 [Source:HGNC Symbol;Acc:HGNC:32427]	no	no	no	no
ENSG00000180938	38	76	8	ZNF572	124973295	124979389	zinc finger protein 572 [Source:HGNC Symbol;Acc:HGNC:26758]	no	no	no	no
ENSG00000181938	38	76	16	GINS3	58295080	58406147	GINS complex subunit 3 [Source:HGNC Symbol;Acc:HGNC:25851]	no	no	no	no
ENSG00000182601	38	76	16	HS3ST4	25691959	26137685	heparan sulfate-glucosamine 3-sulfotransferase 4 [Source:HGNC Symbol;Acc:HGNC:5200]	no	no	no	no
ENSG00000187079	38	76	11	TEAD1	12674421	12944737	TEA domain transcription factor 1 [Source:HGNC Symbol;Acc:HGNC:11714]	no	no	no	no
ENSG00000223703	38	76	2	IGSF3P2	91736726	91767439	IGSF3 pseudogene 2 [Source:HGNC Symbol;Acc:HGNC:55896]	no	no	no	no
ENSG00000231689	38	76	2	LINC01090	187712816	188384365	long intergenic non-protein coding RNA 1090 [Source:HGNC Symbol;Acc:HGNC:49201]	no	no	no	no
ENSG00000233937	38	76	5	ENSG00000233937	181246466	181272167	uncharacterized LOC101928649 [Source:NCBI gene (formerly Entrezgene);Acc:101928649]	no	no	no	no
ENSG00000234284	38	76	5	ZNF879	179023804	179035064	zinc finger protein 879 [Source:HGNC Symbol;Acc:HGNC:37273]	no	no	no	no
ENSG00000239857	38	76	7	GET4	876554	896436	guided entry of tail-anchored proteins factor 4 [Source:HGNC Symbol;Acc:HGNC:21690]	no	no	no	no
ENSG00000242136	38	76	2	ENSG00000242136	9103440	9105114	novel transcript	no	no	no	no
ENSG00000280063	38	76	16	ENSG00000280063	4346694	4348648	tec	no	no	no	no
ENSG00000280604	38	76	21	ENSG00000280604	45914296	45919483	PCBP3 overlapping transcript 1	no	no	no	no
ENSG00000095752	38	76	19	IL11	55364382	55370463	interleukin 11 [Source:HGNC Symbol;Acc:HGNC:5966]	no	no	no	no
ENSG00000121766	38	76	1	ZCCHC17	31296982	31364953	zinc finger CCHC-type containing 17 [Source:HGNC Symbol;Acc:HGNC:30246]	no	no	no	no
ENSG00000179085	38	76	1	DPM3	155139891	155140595	dolichyl-phosphate mannosyltransferase subunit 3, regulatory [Source:HGNC Symbol;Acc:HGNC:3007]	no	no	no	no
ENSG00000251363	38	76	14	LINC02315	40954693	41149309	long intergenic non-protein coding RNA 2315 [Source:HGNC Symbol;Acc:HGNC:53234]	no	no	no	no
ENSG00000095627	37	74	10	TDRD1	114179270	114232666	tudor domain containing 1 [Source:HGNC Symbol;Acc:HGNC:11712]	no	no	no	no
ENSG00000101115	37	74	20	SALL4	51782331	51802521	spalt like transcription factor 4 [Source:HGNC Symbol;Acc:HGNC:15924]	no	no	no	no
ENSG00000103184	37	74	16	SEC14L5	4958330	5019157	SEC14 like lipid binding 5 [Source:HGNC Symbol;Acc:HGNC:29032]	no	no	no	no
ENSG00000106868	37	74	9	SUSD1	112040783	112175297	sushi domain containing 1 [Source:HGNC Symbol;Acc:HGNC:25413]	no	no	no	no
ENSG00000108379	37	74	17	WNT3	46762506	46833154	Wnt family member 3 [Source:HGNC Symbol;Acc:HGNC:12782]	no	no	no	no
ENSG00000124920	37	74	11	MYRF	61752636	61788518	myelin regulatory factor [Source:HGNC Symbol;Acc:HGNC:1181]	no	no	no	no
ENSG00000125462	37	74	1	MIR9-1HG	156404250	156456763	MIR9-1 host gene [Source:HGNC Symbol;Acc:HGNC:30780]	no	no	no	no
ENSG00000126945	37	74	X	HNRNPH2	101408222	101414133	heterogeneous nuclear ribonucleoprotein H2 [Source:HGNC Symbol;Acc:HGNC:5042]	no	no	no	yes
ENSG00000130768	37	74	1	SMPDL3B	27935000	27959157	sphingomyelin phosphodiesterase acid like 3B [Source:HGNC Symbol;Acc:HGNC:21416]	no	no	no	no
ENSG00000148396	37	74	9	SEC16A	136440096	136483759	SEC16 homolog A, endoplasmic reticulum export factor [Source:HGNC Symbol;Acc:HGNC:29006]	no	no	no	no
ENSG00000148400	37	74	9	NOTCH1	136494433	136546048	notch receptor 1 [Source:HGNC Symbol;Acc:HGNC:7881]	no	no	no	no
ENSG00000149311	37	74	11	ATM	108223044	108369102	ATM serine/threonine kinase [Source:HGNC Symbol;Acc:HGNC:795]	no	no	no	no
ENSG00000155093	37	74	7	PTPRN2	157539056	158587823	protein tyrosine phosphatase receptor type N2 [Source:HGNC Symbol;Acc:HGNC:9677]	no	no	no	no
ENSG00000157106	37	74	16	SMG1	18804860	18926408	SMG1 nonsense mediated mRNA decay associated PI3K related kinase [Source:HGNC Symbol;Acc:HGNC:30045]	no	no	no	no
ENSG00000157851	37	74	2	DPYSL5	26847747	26950351	dihydropyrimidinase like 5 [Source:HGNC Symbol;Acc:HGNC:20637]	no	no	no	no
ENSG00000158286	37	74	1	RNF207	6205475	6221299	ring finger protein 207 [Source:HGNC Symbol;Acc:HGNC:32947]	no	no	no	no
ENSG00000160216	37	74	21	AGPAT3	43865223	43987592	1-acylglycerol-3-phosphate O-acyltransferase 3 [Source:HGNC Symbol;Acc:HGNC:326]	no	no	no	no
ENSG00000160796	37	74	3	NBEAL2	46979666	47009704	neurobeachin like 2 [Source:HGNC Symbol;Acc:HGNC:31928]	no	no	no	no
ENSG00000170549	37	74	5	IRX1	3595832	3601403	iroquois homeobox 1 [Source:HGNC Symbol;Acc:HGNC:14358]	no	no	no	no
ENSG00000177692	37	74	21	DNAJC28	33485530	33491716	DnaJ heat shock protein family (Hsp40) member C28 [Source:HGNC Symbol;Acc:HGNC:1297]	no	no	no	no
ENSG00000178381	37	74	7	ZFAND2A	1152071	1160759	zinc finger AN1-type containing 2A [Source:HGNC Symbol;Acc:HGNC:28073]	no	no	no	no
ENSG00000196109	37	74	19	ZNF676	22179089	22215801	zinc finger protein 676 [Source:HGNC Symbol;Acc:HGNC:20429]	no	no	no	no
ENSG00000200087	37	74	1	SNORA73B	28508559	28508762	small nucleolar RNA, H/ACA box 73B [Source:HGNC Symbol;Acc:HGNC:10116]	no	no	no	no
ENSG00000204385	37	74	6	SLC44A4	31863192	31879046	solute carrier family 44 member 4 [Source:HGNC Symbol;Acc:HGNC:13941]	no	no	no	no
ENSG00000213062	37	74	1	ENSG00000213062	169486076	169500182	novel transcript	no	no	no	no
ENSG00000214776	37	74	12	ENSG00000214776	9480608	9575695	alpha-2-macroglobulin like 1 pseudogene	no	no	no	no
ENSG00000224506	37	74	6	LINC02523	125674353	125720218	long intergenic non-protein coding RNA 2523 [Source:HGNC Symbol;Acc:HGNC:53542]	no	no	no	no
ENSG00000226506	37	74	2	ENSG00000226506	7886767	7899725	novel transcript	no	no	no	no
ENSG00000231731	37	74	2	ENSG00000231731	127455394	127514623	novel transcript, antisense to IWS1	no	no	no	no
ENSG00000241472	37	74	3	PTPRG-AS1	62221249	62369406	PTPRG antisense RNA 1 [Source:HGNC Symbol;Acc:HGNC:44638]	no	no	no	no
ENSG00000250994	37	74	5	ENSG00000250994	134436686	134492750	novel transcript	no	no	no	no
ENSG00000251027	37	74	5	LINC01950	106815197	107011052	long intergenic non-protein coding RNA 1950 [Source:HGNC Symbol;Acc:HGNC:52773]	no	no	no	no
ENSG00000253636	37	74	8	ENSG00000253636	73052178	73063061	novel transcript	no	no	no	no
ENSG00000255310	37	74	8	ENSG00000255310	11107788	11109726	novel transcript	no	no	no	no
ENSG00000265241	37	74	1	RBM8A	145921556	145927678	RNA binding motif protein 8A [Source:HGNC Symbol;Acc:HGNC:9905]	no	no	no	no
ENSG00000280294	37	74	8	ENSG00000280294	10856085	10859436	TEC	no	no	no	no
ENSG00000101844	37	74	X	ATG4A	108091668	108154671	autophagy related 4A cysteine peptidase [Source:HGNC Symbol;Acc:HGNC:16489]	no	no	no	yes
ENSG00000111199	37	74	12	TRPV4	109783087	109833406	transient receptor potential cation channel subfamily V member 4 [Source:HGNC Symbol;Acc:HGNC:18083]	no	no	no	no
ENSG00000121716	37	74	7	PILRB	100352176	100367831	paired immunoglobin like type 2 receptor beta [Source:HGNC Symbol;Acc:HGNC:18297]	no	no	no	no
ENSG00000128591	37	74	7	FLNC	128830406	128859274	filamin C [Source:HGNC Symbol;Acc:HGNC:3756]	no	no	no	no
ENSG00000130270	37	74	19	ATP8B3	1782075	1812276	ATPase phospholipid transporting 8B3 [Source:HGNC Symbol;Acc:HGNC:13535]	no	no	no	no
ENSG00000163694	37	74	4	RBM47	40423267	40630875	RNA binding motif protein 47 [Source:HGNC Symbol;Acc:HGNC:30358]	no	no	no	no
ENSG00000163873	37	74	1	GRIK3	36795527	37034515	glutamate ionotropic receptor kainate type subunit 3 [Source:HGNC Symbol;Acc:HGNC:4581]	no	no	no	no
ENSG00000167554	37	74	19	ZNF610	52336243	52367778	zinc finger protein 610 [Source:HGNC Symbol;Acc:HGNC:26687]	no	no	no	no
ENSG00000180667	37	74	1	YOD1	207043849	207052980	YOD1 deubiquitinase [Source:HGNC Symbol;Acc:HGNC:25035]	no	no	no	no
ENSG00000183508	37	74	1	TENT5C	117606048	117628389	terminal nucleotidyltransferase 5C [Source:HGNC Symbol;Acc:HGNC:24712]	no	no	no	no
ENSG00000204524	37	74	19	ZNF805	57240632	57262728	zinc finger protein 805 [Source:HGNC Symbol;Acc:HGNC:23272]	no	no	no	no
ENSG00000272086	37	74	5	GOLPH3-DT	32173960	32175273	GOLPH3 divergent transcript [Source:HGNC Symbol;Acc:HGNC:55231]	no	no	no	no
ENSG00000286388	37	74	5	ENSG00000286388	1345197	1350786	novel transcript	no	no	no	no
ENSG00000009709	36	72	1	PAX7	18630846	18748866	paired box 7 [Source:HGNC Symbol;Acc:HGNC:8621]	no	no	no	no
ENSG00000011332	36	72	19	DPF1	38211006	38229714	double PHD fingers 1 [Source:HGNC Symbol;Acc:HGNC:20225]	no	no	no	no
ENSG00000035141	36	72	2	FAM136A	70295976	70302067	family with sequence similarity 136 member A [Source:HGNC Symbol;Acc:HGNC:25911]	no	no	no	no
ENSG00000053524	36	72	3	MCF2L2	183178041	183428778	MCF.2 cell line derived transforming sequence-like 2 [Source:HGNC Symbol;Acc:HGNC:30319]	no	no	no	no
ENSG00000094841	36	72	X	UPRT	75156388	75304885	uracil phosphoribosyltransferase homolog [Source:HGNC Symbol;Acc:HGNC:28334]	no	no	no	yes
ENSG00000103274	36	72	16	NUBP1	10743786	10769351	NUBP iron-sulfur cluster assembly factor 1, cytosolic [Source:HGNC Symbol;Acc:HGNC:8041]	no	no	no	no
ENSG00000122733	36	72	9	PHF24	34957608	34982544	PHD finger protein 24 [Source:HGNC Symbol;Acc:HGNC:29180]	no	no	no	no
ENSG00000132359	36	72	17	RAP1GAP2	2755705	3037741	RAP1 GTPase activating protein 2 [Source:HGNC Symbol;Acc:HGNC:29176]	no	no	no	no
ENSG00000133101	36	72	13	CCNA1	36431520	36442870	cyclin A1 [Source:HGNC Symbol;Acc:HGNC:1577]	no	no	no	no
ENSG00000134030	36	72	18	CTIF	48539031	48863217	cap binding complex dependent translation initiation factor [Source:HGNC Symbol;Acc:HGNC:23925]	no	no	no	no
ENSG00000137872	36	72	15	SEMA6D	47184101	47774228	semaphorin 6D [Source:HGNC Symbol;Acc:HGNC:16770]	no	no	no	no
ENSG00000142279	36	72	19	WTIP	34481758	34512304	WT1 interacting protein [Source:HGNC Symbol;Acc:HGNC:20964]	no	no	no	no
ENSG00000143569	36	72	1	UBAP2L	154220179	154271510	ubiquitin associated protein 2 like [Source:HGNC Symbol;Acc:HGNC:29877]	no	no	no	no
ENSG00000156103	36	72	8	MMP16	88032011	88328025	matrix metallopeptidase 16 [Source:HGNC Symbol;Acc:HGNC:7162]	no	no	no	no
ENSG00000158352	36	72	X	SHROOM4	50586796	50814302	shroom family member 4 [Source:HGNC Symbol;Acc:HGNC:29215]	no	no	no	yes
ENSG00000163820	36	72	3	FYCO1	45917903	45995824	FYVE and coiled-coil domain autophagy adaptor 1 [Source:HGNC Symbol;Acc:HGNC:14673]	no	no	no	no
ENSG00000164128	36	72	4	NPY1R	163323962	163344832	neuropeptide Y receptor Y1 [Source:HGNC Symbol;Acc:HGNC:7956]	no	no	no	no
ENSG00000164171	36	72	5	ITGA2	52989340	53094779	integrin subunit alpha 2 [Source:HGNC Symbol;Acc:HGNC:6137]	no	no	no	no
ENSG00000165379	36	72	14	LRFN5	41606876	41904549	leucine rich repeat and fibronectin type III domain containing 5 [Source:HGNC Symbol;Acc:HGNC:20360]	no	no	no	no
ENSG00000170049	36	72	17	KCNAB3	7921859	7929856	potassium voltage-gated channel subfamily A regulatory beta subunit 3 [Source:HGNC Symbol;Acc:HGNC:6230]	no	no	no	no
ENSG00000183495	36	72	12	EP400	131949942	132080460	E1A binding protein p400 [Source:HGNC Symbol;Acc:HGNC:11958]	no	no	no	no
ENSG00000185905	36	72	16	C16orf54	29742463	29745990	chromosome 16 open reading frame 54 [Source:HGNC Symbol;Acc:HGNC:26649]	no	no	no	no
ENSG00000188177	36	72	2	ZC3H6	112275597	112340063	zinc finger CCCH-type containing 6 [Source:HGNC Symbol;Acc:HGNC:24762]	no	no	no	no
ENSG00000196923	36	72	5	PDLIM7	177483394	177497606	PDZ and LIM domain 7 [Source:HGNC Symbol;Acc:HGNC:22958]	no	no	no	no
ENSG00000197721	36	72	1	CR1L	207645113	207738416	complement C3b/C4b receptor 1 like [Source:HGNC Symbol;Acc:HGNC:2335]	no	no	no	no
ENSG00000204959	36	72	7	ARHGEF34P	144272445	144286966	Rho guanine nucleotide exchange factor 34, pseudogene [Source:HGNC Symbol;Acc:HGNC:38086]	no	no	no	no
ENSG00000224114	36	72	1	ENSG00000224114	206695837	206696269	ribosomal protein S14 (RPS14) pseudogene	no	no	no	no
ENSG00000224975	36	72	X	INE1	47204921	47205865	inactivation escape 1 [Source:HGNC Symbol;Acc:HGNC:6060]	no	no	no	no
ENSG00000229152	36	72	13	ANKRD10-IT1	110894639	110899172	ANKRD10 intronic transcript 1 [Source:HGNC Symbol;Acc:HGNC:39891]	no	no	no	no
ENSG00000230269	36	72	6	LINC02525	3182626	3195784	long intergenic non-protein coding RNA 2525 [Source:HGNC Symbol;Acc:HGNC:53545]	no	no	no	no
ENSG00000231431	36	72	2	FAR2P4	131296843	131309068	fatty acyl-CoA reductase 2 pseudogene 4 [Source:HGNC Symbol;Acc:HGNC:49286]	no	no	no	no
ENSG00000239559	36	72	11	RPL37P2	67682772	67683058	ribosomal protein L37 pseudogene 2 [Source:HGNC Symbol;Acc:HGNC:17092]	no	no	no	no
ENSG00000246982	36	72	6	BRPF3-AS1	36146698	36197205	BRPF3 antisense RNA 1 [Source:HGNC Symbol;Acc:HGNC:55591]	no	no	no	no
ENSG00000251562	36	72	11	MALAT1	65497688	65506516	metastasis associated lung adenocarcinoma transcript 1 [Source:HGNC Symbol;Acc:HGNC:29665]	no	no	no	no
ENSG00000253170	36	72	4	ENSG00000253170	97120701	97135059	novel transcript	no	no	no	no
ENSG00000255618	36	72	12	LINC02440	118773031	118775137	long intergenic non-protein coding RNA 2440 [Source:HGNC Symbol;Acc:HGNC:53372]	no	no	no	no
ENSG00000274090	36	72	13	ENSG00000274090	55535697	55583524	novel transcript	no	no	no	no
ENSG00000277687	36	72	10	ENSG00000277687	118692361	118693535	novel transcript, sense intronic to CACUL1	no	no	no	no
ENSG00000278811	36	72	1	LINC00624	147258885	147517875	long intergenic non-protein coding RNA 624 [Source:HGNC Symbol;Acc:HGNC:44254]	no	no	no	no
ENSG00000279207	36	72	17	ENSG00000279207	58095672	58101479	novel transcript	no	no	no	no
ENSG00000279789	36	72	16	ENSG00000279789	29913144	29915337	novel transcript, sense intronic to KCTD13	no	no	no	no
ENSG00000288398	36	72	1	ENSG00000288398	16228674	16231335	novel transcript	no	no	no	no
ENSG00000102271	36	72	X	KLHL4	87517409	87670050	kelch like family member 4 [Source:HGNC Symbol;Acc:HGNC:6355]	no	no	no	yes
ENSG00000132434	36	72	7	LANCL2	55365337	55433737	LanC like glutathione S-transferase 2 [Source:HGNC Symbol;Acc:HGNC:6509]	no	no	no	no
ENSG00000139211	36	72	12	AMIGO2	47075707	47079959	adhesion molecule with Ig like domain 2 [Source:HGNC Symbol;Acc:HGNC:24073]	no	no	no	no
ENSG00000159399	36	72	2	HK2	74834127	74893359	hexokinase 2 [Source:HGNC Symbol;Acc:HGNC:4923]	no	no	no	no
ENSG00000175793	36	72	1	SFN	26863149	26864456	stratifin [Source:HGNC Symbol;Acc:HGNC:10773]	no	no	no	no
ENSG00000180611	36	72	3	MB21D2	192796815	192917856	Mab-21 domain containing 2 [Source:HGNC Symbol;Acc:HGNC:30438]	no	no	no	no
ENSG00000180787	36	72	17	ZFP3	5078467	5096374	ZFP3 zinc finger protein [Source:HGNC Symbol;Acc:HGNC:12861]	no	no	no	no
ENSG00000233290	36	72	1	ENSG00000233290	82212413	82848205	novel transcript	no	no	no	no
ENSG00000080007	36	72	6	DDX43	73394828	73417566	DEAD-box helicase 43 [Source:HGNC Symbol;Acc:HGNC:18677]	no	no	no	no
ENSG00000276846	36	72	19	ENSG00000276846	37314868	37315620	novel transcript, antisense to HKR1	no	no	no	no
ENSG00000106772	36	72	9	PRUNE2	76611376	76906114	prune homolog 2 with BCH domain [Source:HGNC Symbol;Acc:HGNC:25209]	no	no	no	no
ENSG00000005471	35	70	7	ABCB4	87401696	87480435	ATP binding cassette subfamily B member 4 [Source:HGNC Symbol;Acc:HGNC:45]	no	no	no	no
ENSG00000055130	35	70	7	CUL1	148697914	148801110	cullin 1 [Source:HGNC Symbol;Acc:HGNC:2551]	no	no	no	no
ENSG00000068489	35	70	17	PRR11	59155732	59206709	proline rich 11 [Source:HGNC Symbol;Acc:HGNC:25619]	no	no	no	no
ENSG00000092345	35	70	3	DAZL	16586792	16670306	deleted in azoospermia like [Source:HGNC Symbol;Acc:HGNC:2685]	no	no	no	no
ENSG00000112320	35	70	6	SOBP	107490106	107661306	sine oculis binding protein homolog [Source:HGNC Symbol;Acc:HGNC:29256]	no	no	no	no
ENSG00000116717	35	70	1	GADD45A	67685201	67688334	growth arrest and DNA damage inducible alpha [Source:HGNC Symbol;Acc:HGNC:4095]	no	no	no	no
ENSG00000117569	35	70	1	PTBP2	96721665	96823738	polypyrimidine tract binding protein 2 [Source:HGNC Symbol;Acc:HGNC:17662]	no	no	no	no
ENSG00000119328	35	70	9	ABITRAM	108934400	108950744	actin binding transcription modulator [Source:HGNC Symbol;Acc:HGNC:1364]	no	no	no	no
ENSG00000123405	35	70	12	NFE2	54292111	54301015	nuclear factor, erythroid 2 [Source:HGNC Symbol;Acc:HGNC:7780]	no	no	no	no
ENSG00000130055	35	70	X	GDPD2	70423031	70433390	glycerophosphodiester phosphodiesterase domain containing 2 [Source:HGNC Symbol;Acc:HGNC:25974]	no	no	no	no
ENSG00000130714	35	70	9	POMT1	131502789	131523806	protein O-mannosyltransferase 1 [Source:HGNC Symbol;Acc:HGNC:9202]	no	no	no	no
ENSG00000133134	35	70	X	BEX2	103309346	103311007	brain expressed X-linked 2 [Source:HGNC Symbol;Acc:HGNC:30933]	no	no	no	yes
ENSG00000139372	35	70	12	TDG	103965822	103988874	thymine DNA glycosylase [Source:HGNC Symbol;Acc:HGNC:11700]	no	no	no	no
ENSG00000146476	35	70	6	ARMT1	151452258	151470101	acidic residue methyltransferase 1 [Source:HGNC Symbol;Acc:HGNC:17872]	no	no	no	no
ENSG00000147526	35	70	8	TACC1	38728186	38853028	transforming acidic coiled-coil containing protein 1 [Source:HGNC Symbol;Acc:HGNC:11522]	no	no	no	no
ENSG00000147601	35	70	8	TERF1	73008856	73048123	telomeric repeat binding factor 1 [Source:HGNC Symbol;Acc:HGNC:11728]	no	no	no	no
ENSG00000148291	35	70	9	SURF2	133356550	133361158	surfeit 2 [Source:HGNC Symbol;Acc:HGNC:11475]	no	no	no	no
ENSG00000151364	35	70	11	KCTD14	78015715	78046191	potassium channel tetramerization domain containing 14 [Source:HGNC Symbol;Acc:HGNC:23295]	no	no	no	no
ENSG00000154122	35	70	5	ANKH	14704800	14871778	ANKH inorganic pyrophosphate transport regulator [Source:HGNC Symbol;Acc:HGNC:15492]	no	no	no	no
ENSG00000156398	35	70	10	SFXN2	102714538	102743492	sideroflexin 2 [Source:HGNC Symbol;Acc:HGNC:16086]	no	no	no	no
ENSG00000157036	35	70	3	EXOG	38496127	38542161	exo/endonuclease G [Source:HGNC Symbol;Acc:HGNC:3347]	no	no	no	no
ENSG00000162374	35	70	1	ELAVL4	50024029	50203772	ELAV like RNA binding protein 4 [Source:HGNC Symbol;Acc:HGNC:3315]	no	no	no	no
ENSG00000162572	35	70	1	SCNN1D	1280436	1292029	sodium channel epithelial 1 subunit delta [Source:HGNC Symbol;Acc:HGNC:10601]	no	no	no	no
ENSG00000166321	35	70	10	NUDT13	73110375	73131828	nudix hydrolase 13 [Source:HGNC Symbol;Acc:HGNC:18827]	no	no	no	no
ENSG00000171126	35	70	2	KCNG3	42442017	42493982	potassium voltage-gated channel modifier subfamily G member 3 [Source:HGNC Symbol;Acc:HGNC:18306]	no	no	no	no
ENSG00000172667	35	70	3	ZMAT3	178960121	179072215	zinc finger matrin-type 3 [Source:HGNC Symbol;Acc:HGNC:29983]	no	no	no	no
ENSG00000175322	35	70	18	ZNF519	14057457	14132490	zinc finger protein 519 [Source:HGNC Symbol;Acc:HGNC:30574]	no	no	no	no
ENSG00000175591	35	70	11	P2RY2	73218281	73242427	purinergic receptor P2Y2 [Source:HGNC Symbol;Acc:HGNC:8541]	no	no	no	no
ENSG00000178201	35	70	19	VN1R1	57454790	57457140	vomeronasal 1 receptor 1 [Source:HGNC Symbol;Acc:HGNC:13548]	no	no	no	no
ENSG00000180730	35	70	13	SHISA2	26044597	26052016	shisa family member 2 [Source:HGNC Symbol;Acc:HGNC:20366]	no	no	no	no
ENSG00000182253	35	70	15	SYNM	99098217	99135593	synemin [Source:HGNC Symbol;Acc:HGNC:24466]	no	no	no	no
ENSG00000184408	35	70	7	KCND2	120273175	120750337	potassium voltage-gated channel subfamily D member 2 [Source:HGNC Symbol;Acc:HGNC:6238]	no	no	no	no
ENSG00000186007	35	70	1	LEMD1	205381378	205455954	LEM domain containing 1 [Source:HGNC Symbol;Acc:HGNC:18725]	no	no	no	no
ENSG00000188517	35	70	4	COL25A1	108808725	109302752	collagen type XXV alpha 1 chain [Source:HGNC Symbol;Acc:HGNC:18603]	no	no	no	no
ENSG00000198720	35	70	17	ANKRD13B	29589769	29614761	ankyrin repeat domain 13B [Source:HGNC Symbol;Acc:HGNC:26363]	no	no	no	no
ENSG00000204121	35	70	2	ECEL1P1	232415818	232419816	endothelin converting enzyme like 1 pseudogene 1 [Source:HGNC Symbol;Acc:HGNC:14017]	no	no	no	no
ENSG00000204257	35	70	6	HLA-DMA	32948613	32969094	major histocompatibility complex, class II, DM alpha [Source:HGNC Symbol;Acc:HGNC:4934]	no	no	no	no
ENSG00000204936	35	70	19	CD177	43353686	43363172	CD177 molecule [Source:HGNC Symbol;Acc:HGNC:30072]	no	no	no	no
ENSG00000217801	35	70	1	ENSG00000217801	1063079	1069355	protein tyrosine phosphatase family pseudogene	no	no	no	no
ENSG00000223804	35	70	1	ENSG00000223804	120340756	120341839	Poly [ADP-ribose] polymerase 8 (PARP8) pseudogene	no	no	no	no
ENSG00000234444	35	70	7	ZNF736	64307459	64356634	zinc finger protein 736 [Source:HGNC Symbol;Acc:HGNC:32467]	no	no	no	no
ENSG00000234537	35	70	9	ENSG00000234537	92132398	92138629	protein tyrosine phosphatase (similar to rodent ESP) pseudogene	no	no	no	no
ENSG00000271860	35	70	6	ENSG00000271860	97283303	98400869	novel transcript	no	no	no	no
ENSG00000278175	35	70	9	GLIDR	39709535	39810128	glioblastoma down-regulated RNA [Source:HGNC Symbol;Acc:HGNC:48823]	no	no	no	no
ENSG00000286909	35	70	3	ENSG00000286909	197649303	197651482	novel transcript	no	no	no	no
ENSG00000120937	35	70	1	NPPB	11857464	11858945	natriuretic peptide B [Source:HGNC Symbol;Acc:HGNC:7940]	no	no	no	no
ENSG00000126733	35	70	X	DACH2	86148451	86832604	dachshund family transcription factor 2 [Source:HGNC Symbol;Acc:HGNC:16814]	no	no	yes	no
ENSG00000172086	35	70	2	KRCC1	88027205	88064252	lysine rich coiled-coil 1 [Source:HGNC Symbol;Acc:HGNC:28039]	no	no	no	no
ENSG00000261373	35	70	16	VPS9D1-AS1	89711856	89718165	VPS9D1 antisense RNA 1 [Source:HGNC Symbol;Acc:HGNC:48915]	no	no	no	no
ENSG00000265688	35	70	17	MILIP	81927829	81930753	MYC inducible lncRNA inactivating p53 [Source:HGNC Symbol;Acc:HGNC:43649]	no	no	no	no
ENSG00000095303	35	70	9	PTGS1	122370530	122395703	prostaglandin-endoperoxide synthase 1 [Source:HGNC Symbol;Acc:HGNC:9604]	no	no	no	no
ENSG00000005961	34	68	17	ITGA2B	44372180	44389649	integrin subunit alpha 2b [Source:HGNC Symbol;Acc:HGNC:6138]	no	no	no	no
ENSG00000069535	34	68	X	MAOB	43766610	43882450	monoamine oxidase B [Source:HGNC Symbol;Acc:HGNC:6834]	no	no	no	yes
ENSG00000101460	34	68	20	MAP1LC3A	34546854	34560345	microtubule associated protein 1 light chain 3 alpha [Source:HGNC Symbol;Acc:HGNC:6838]	no	no	no	no
ENSG00000111254	34	68	12	AKAP3	4615508	4649051	A-kinase anchoring protein 3 [Source:HGNC Symbol;Acc:HGNC:373]	no	no	no	no
ENSG00000113971	34	68	3	NPHP3	132680609	132722432	nephrocystin 3 [Source:HGNC Symbol;Acc:HGNC:7907]	no	no	no	no
ENSG00000114023	34	68	3	FAM162A	122384161	122412334	family with sequence similarity 162 member A [Source:HGNC Symbol;Acc:HGNC:17865]	no	no	no	no
ENSG00000142698	34	68	1	C1orf94	34166883	34219131	chromosome 1 open reading frame 94 [Source:HGNC Symbol;Acc:HGNC:28250]	no	no	no	no
ENSG00000144395	34	68	2	CCDC150	196639554	196763490	coiled-coil domain containing 150 [Source:HGNC Symbol;Acc:HGNC:26834]	no	no	no	no
ENSG00000149600	34	68	20	COMMD7	32702699	32743467	COMM domain containing 7 [Source:HGNC Symbol;Acc:HGNC:16223]	no	no	no	no
ENSG00000165259	34	68	X	HDX	84317874	84502479	highly divergent homeobox [Source:HGNC Symbol;Acc:HGNC:26411]	no	no	no	yes
ENSG00000167377	34	68	16	ZNF23	71447597	71463095	zinc finger protein 23 [Source:HGNC Symbol;Acc:HGNC:13023]	no	no	no	no
ENSG00000168137	34	68	3	SETD5	9397615	9479240	SET domain containing 5 [Source:HGNC Symbol;Acc:HGNC:25566]	no	no	no	no
ENSG00000169914	34	68	1	OTUD3	19882395	19912945	OTU deubiquitinase 3 [Source:HGNC Symbol;Acc:HGNC:29038]	no	no	no	no
ENSG00000177595	34	68	11	PIDD1	799179	809753	p53-induced death domain protein 1 [Source:HGNC Symbol;Acc:HGNC:16491]	no	no	no	no
ENSG00000182534	34	68	17	MXRA7	76672551	76711004	matrix remodeling associated 7 [Source:HGNC Symbol;Acc:HGNC:7541]	no	no	no	no
ENSG00000183908	34	68	11	LRRC55	57181747	57191717	leucine rich repeat containing 55 [Source:HGNC Symbol;Acc:HGNC:32324]	no	no	no	no
ENSG00000184557	34	68	17	SOCS3	78356778	78360077	suppressor of cytokine signaling 3 [Source:HGNC Symbol;Acc:HGNC:19391]	no	no	no	no
ENSG00000196547	34	68	15	MAN2A2	90902218	90922584	mannosidase alpha class 2A member 2 [Source:HGNC Symbol;Acc:HGNC:6825]	no	no	no	no
ENSG00000206535	34	68	3	LNP1	100401532	100456319	leukemia NUP98 fusion partner 1 [Source:HGNC Symbol;Acc:HGNC:28014]	no	no	no	no
ENSG00000243753	34	68	6	HLA-L	30259625	30261703	major histocompatibility complex, class I, L (pseudogene) [Source:HGNC Symbol;Acc:HGNC:4970]	no	no	no	no
ENSG00000248131	34	68	5	LINC01194	12574830	12804363	long intergenic non-protein coding RNA 1194 [Source:HGNC Symbol;Acc:HGNC:37171]	no	no	no	no
ENSG00000258559	34	68	14	ENSG00000258559	74289127	74294425	novel transcript, sense overlapping ABCD4	no	no	no	no
ENSG00000259562	34	68	15	ENSG00000259562	78290527	78291221	zinc finger CCHC-type and RNA binding motif 1 (ZCRB1) pseudogene	no	no	no	no
ENSG00000273340	34	68	6	MICE	29741731	29748969	MHC class I polypeptide-related sequence E (pseudogene) [Source:HGNC Symbol;Acc:HGNC:7094]	no	no	no	no
ENSG00000278367	34	68	20	ENSG00000278367	35174355	35174919	novel transcript, antisense to PROCR	no	no	no	no
ENSG00000280120	34	68	12	ENSG00000280120	123152324	123153377	novel transcript	no	no	no	no
ENSG00000078725	34	68	9	BRINP1	119153458	119369435	BMP/retinoic acid inducible neural specific 1 [Source:HGNC Symbol;Acc:HGNC:2687]	no	no	no	no
ENSG00000100028	34	68	22	SNRPD3	24555958	24582052	small nuclear ribonucleoprotein D3 polypeptide [Source:HGNC Symbol;Acc:HGNC:11160]	no	no	no	no
ENSG00000101825	34	68	X	MXRA5	3308565	3346652	matrix remodeling associated 5 [Source:HGNC Symbol;Acc:HGNC:7539]	no	yes	no	no
ENSG00000105643	34	68	19	ARRDC2	18001132	18014102	arrestin domain containing 2 [Source:HGNC Symbol;Acc:HGNC:25225]	no	no	no	no
ENSG00000116183	34	68	1	PAPPA2	176463171	176845601	pappalysin 2 [Source:HGNC Symbol;Acc:HGNC:14615]	no	no	no	no
ENSG00000162415	34	68	1	ZSWIM5	45016399	45306209	zinc finger SWIM-type containing 5 [Source:HGNC Symbol;Acc:HGNC:29299]	no	no	no	no
ENSG00000167799	34	68	11	NUDT8	67627938	67629937	nudix hydrolase 8 [Source:HGNC Symbol;Acc:HGNC:8055]	no	no	no	no
ENSG00000172985	34	68	2	SH3RF3	109129205	109504634	SH3 domain containing ring finger 3 [Source:HGNC Symbol;Acc:HGNC:24699]	no	no	no	no
ENSG00000197044	34	68	19	ZNF441	11767000	11784078	zinc finger protein 441 [Source:HGNC Symbol;Acc:HGNC:20875]	no	no	no	no
ENSG00000260007	34	68	15	ENSG00000260007	68184032	68229718	novel protein	no	no	no	no
ENSG00000260231	34	68	7	KDM7A-DT	140177184	140179640	KDM7A divergent transcript [Source:HGNC Symbol;Acc:HGNC:48959]	no	no	no	no
ENSG00000184261	34	68	2	KCNK12	47509290	47570985	potassium two pore domain channel subfamily K member 12 [Source:HGNC Symbol;Acc:HGNC:6274]	no	no	no	no
ENSG00000258743	34	68	14	LINC02301	82642600	82746664	long intergenic non-protein coding RNA 2301 [Source:HGNC Symbol;Acc:HGNC:53220]	no	no	no	no
ENSG00000000003	33	66	X	TSPAN6	100627108	100639991	tetraspanin 6 [Source:HGNC Symbol;Acc:HGNC:11858]	no	no	yes	no
ENSG00000050628	33	66	1	PTGER3	70852353	71047816	prostaglandin E receptor 3 [Source:HGNC Symbol;Acc:HGNC:9595]	no	no	no	no
ENSG00000070476	33	66	3	ZXDC	126437601	126475891	ZXD family zinc finger C [Source:HGNC Symbol;Acc:HGNC:28160]	no	no	no	no
ENSG00000115129	33	66	2	TP53I3	24077433	24085861	tumor protein p53 inducible protein 3 [Source:HGNC Symbol;Acc:HGNC:19373]	no	no	no	no
ENSG00000115828	33	66	2	QPCT	37342827	37373322	glutaminyl-peptide cyclotransferase [Source:HGNC Symbol;Acc:HGNC:9753]	no	no	no	no
ENSG00000132297	33	66	8	HHLA1	132061480	132111159	HERV-H LTR-associating 1 [Source:HGNC Symbol;Acc:HGNC:4904]	no	no	no	no
ENSG00000139687	33	66	13	RB1	48303744	48599436	RB transcriptional corepressor 1 [Source:HGNC Symbol;Acc:HGNC:9884]	no	no	no	no
ENSG00000139719	33	66	12	VPS33A	122229564	122266494	VPS33A core subunit of CORVET and HOPS complexes [Source:HGNC Symbol;Acc:HGNC:18179]	no	no	no	no
ENSG00000140093	33	66	14	SERPINA10	94280460	94293268	serpin family A member 10 [Source:HGNC Symbol;Acc:HGNC:15996]	no	no	no	no
ENSG00000140557	33	66	15	ST8SIA2	92393881	92468728	ST8 alpha-N-acetyl-neuraminide alpha-2,8-sialyltransferase 2 [Source:HGNC Symbol;Acc:HGNC:10870]	no	no	no	no
ENSG00000148942	33	66	11	SLC5A12	26667020	26723427	solute carrier family 5 member 12 [Source:HGNC Symbol;Acc:HGNC:28750]	no	no	no	no
ENSG00000165591	33	66	X	FAAH2	57286706	57489193	fatty acid amide hydrolase 2 [Source:HGNC Symbol;Acc:HGNC:26440]	no	no	no	yes
ENSG00000166439	33	66	11	RNF169	74748849	74842413	ring finger protein 169 [Source:HGNC Symbol;Acc:HGNC:26961]	no	no	no	no
ENSG00000173950	33	66	3	XXYLT1	195068284	195271159	xyloside xylosyltransferase 1 [Source:HGNC Symbol;Acc:HGNC:26639]	no	no	no	no
ENSG00000177181	33	66	1	RIMKLA	42380792	42424232	ribosomal modification protein rimK like family member A [Source:HGNC Symbol;Acc:HGNC:28725]	no	no	no	no
ENSG00000230805	33	66	14	ENSG00000230805	101071978	101077910	novel transcript	no	no	no	no
ENSG00000233718	33	66	2	MYCNOS	15918350	15942249	MYCN opposite strand [Source:HGNC Symbol;Acc:HGNC:16911]	no	no	no	no
ENSG00000234546	33	66	1	LNCTAM34A	9182004	9196284	long non coding transcriptional activator of miR34a [Source:HGNC Symbol;Acc:HGNC:52548]	no	no	no	no
ENSG00000253230	33	66	8	MIR124-1HG	9899871	9919233	MIR124-1 host gene [Source:HGNC Symbol;Acc:HGNC:27231]	no	no	no	no
ENSG00000261804	33	66	16	ENSG00000261804	53373479	53385142	novel transcript	no	no	no	no
ENSG00000105808	33	66	7	RASA4	102579646	102616756	RAS p21 protein activator 4 [Source:HGNC Symbol;Acc:HGNC:23181]	no	no	no	no
ENSG00000132801	33	66	20	ZSWIM3	45857614	45879122	zinc finger SWIM-type containing 3 [Source:HGNC Symbol;Acc:HGNC:16157]	no	no	no	no
ENSG00000136888	33	66	9	ATP6V1G1	114587706	114598915	ATPase H+ transporting V1 subunit G1 [Source:HGNC Symbol;Acc:HGNC:864]	no	no	no	no
ENSG00000145675	33	66	5	PIK3R1	68215740	68301821	phosphoinositide-3-kinase regulatory subunit 1 [Source:HGNC Symbol;Acc:HGNC:8979]	no	no	no	no
ENSG00000164659	33	66	7	ELAPOR2	86876906	87059654	endosome-lysosome associated apoptosis and autophagy regulator family member 2 [Source:HGNC Symbol;Acc:HGNC:21945]	no	no	no	no
ENSG00000168487	33	66	8	BMP1	22165140	22212326	bone morphogenetic protein 1 [Source:HGNC Symbol;Acc:HGNC:1067]	no	no	no	no
ENSG00000175701	33	66	2	MTLN	110211529	110245420	mitoregulin [Source:HGNC Symbol;Acc:HGNC:27339]	no	no	no	no
ENSG00000176022	33	66	1	B3GALT6	1232237	1235041	beta-1,3-galactosyltransferase 6 [Source:HGNC Symbol;Acc:HGNC:17978]	no	no	no	no
ENSG00000180209	33	66	16	MYL11	30370934	30377991	myosin light chain 11 [Source:HGNC Symbol;Acc:HGNC:29824]	no	no	no	no
ENSG00000197165	33	66	16	SULT1A2	28591943	28597050	sulfotransferase family 1A member 2 [Source:HGNC Symbol;Acc:HGNC:11454]	no	no	no	no
ENSG00000260615	33	66	13	RPL23AP97	114346167	114346637	ribosomal protein L23a pseudogene 97 [Source:HGNC Symbol;Acc:HGNC:51632]	no	no	no	no
ENSG00000287527	33	66	5	ENSG00000287527	141822076	141825488	novel transcript	no	no	no	no
ENSG00000287630	33	66	5	ENSG00000287630	147725551	147728464	novel transcript, antisense to JAKMIP2	no	no	no	no
ENSG00000160766	33	66	1	GBAP1	155214368	155218874	glucosylceramidase beta pseudogene 1 [Source:HGNC Symbol;Acc:HGNC:4178]	no	no	no	no
ENSG00000005810	32	64	13	MYCBP2	77042474	77327094	MYC binding protein 2 [Source:HGNC Symbol;Acc:HGNC:23386]	no	no	no	no
ENSG00000006025	32	64	17	OSBPL7	47807372	47821834	oxysterol binding protein like 7 [Source:HGNC Symbol;Acc:HGNC:16387]	no	no	no	no
ENSG00000079257	32	64	3	LXN	158645822	158672648	latexin [Source:HGNC Symbol;Acc:HGNC:13347]	no	no	no	no
ENSG00000106631	32	64	7	MYL7	44138864	44141332	myosin light chain 7 [Source:HGNC Symbol;Acc:HGNC:21719]	no	no	no	no
ENSG00000119280	32	64	1	C1orf198	230837119	230869589	chromosome 1 open reading frame 198 [Source:HGNC Symbol;Acc:HGNC:25900]	no	no	no	no
ENSG00000142606	32	64	1	MMEL1	2590639	2633016	membrane metalloendopeptidase like 1 [Source:HGNC Symbol;Acc:HGNC:14668]	no	no	no	no
ENSG00000168952	32	64	14	STXBP6	24809454	25050147	syntaxin binding protein 6 [Source:HGNC Symbol;Acc:HGNC:19666]	no	no	no	no
ENSG00000171943	32	64	1	SRGAP2C	121184811	121392874	SLIT-ROBO Rho GTPase activating protein 2C [Source:HGNC Symbol;Acc:HGNC:30584]	no	no	no	no
ENSG00000176402	32	64	7	GJC3	99923266	99929620	gap junction protein gamma 3 [Source:HGNC Symbol;Acc:HGNC:17495]	no	no	no	no
ENSG00000177352	32	64	3	CCDC71	49162535	49166331	coiled-coil domain containing 71 [Source:HGNC Symbol;Acc:HGNC:25760]	no	no	no	no
ENSG00000179314	32	64	17	WSCD1	6057807	6124427	WSC domain containing 1 [Source:HGNC Symbol;Acc:HGNC:29060]	no	no	no	no
ENSG00000186567	32	64	19	CEACAM19	44662278	44684359	CEA cell adhesion molecule 19 [Source:HGNC Symbol;Acc:HGNC:31951]	no	no	no	no
ENSG00000197608	32	64	19	ZNF841	52064465	52095765	zinc finger protein 841 [Source:HGNC Symbol;Acc:HGNC:27611]	no	no	no	no
ENSG00000228784	32	64	2	LINC00954	19868860	19885047	long intergenic non-protein coding RNA 954 [Source:HGNC Symbol;Acc:HGNC:48668]	no	no	no	no
ENSG00000230091	32	64	10	TMEM254-AS1	80046860	80078912	TMEM254 antisense RNA 1 [Source:HGNC Symbol;Acc:HGNC:27340]	no	no	no	no
ENSG00000250986	32	64	4	LINC02600	3758748	3763390	long intergenic non-protein coding RNA 2600 [Source:HGNC Symbol;Acc:HGNC:53177]	no	no	no	no
ENSG00000260266	32	64	15	PPIAP46	74350768	74364620	peptidylprolyl isomerase A pseudogene 46 [Source:HGNC Symbol;Acc:HGNC:53670]	no	no	no	no
ENSG00000263146	32	64	18	LINC01896	78976555	78979074	long intergenic non-protein coding RNA 1896 [Source:HGNC Symbol;Acc:HGNC:52715]	no	no	no	no
ENSG00000267374	32	64	18	MIR924HG	39206917	39800322	MIR924 host gene [Source:HGNC Symbol;Acc:HGNC:44332]	no	no	no	no
ENSG00000269713	32	64	1	NBPF9	149052186	149103561	NBPF member 9 [Source:HGNC Symbol;Acc:HGNC:31991]	no	no	no	no
ENSG00000273270	32	64	7	ENSG00000273270	128524016	128531069	novel transcript	no	no	no	no
ENSG00000282458	32	64	19	WASH5P	60951	71626	WASP family homolog 5, pseudogene [Source:HGNC Symbol;Acc:HGNC:33884]	no	no	no	no
ENSG00000283236	32	64	19	ENSG00000283236	51860242	51863236	novel zinc finger protein pseudogene	no	no	no	no
ENSG00000106100	32	64	7	NOD1	30424527	30478784	nucleotide binding oligomerization domain containing 1 [Source:HGNC Symbol;Acc:HGNC:16390]	no	no	no	no
ENSG00000106701	32	64	9	FSD1L	105447796	105552433	fibronectin type III and SPRY domain containing 1 like [Source:HGNC Symbol;Acc:HGNC:13753]	no	no	no	no
ENSG00000128594	32	64	7	LRRC4	128027071	128032107	leucine rich repeat containing 4 [Source:HGNC Symbol;Acc:HGNC:15586]	no	no	no	no
ENSG00000136450	32	64	17	SRSF1	58000919	58007346	serine and arginine rich splicing factor 1 [Source:HGNC Symbol;Acc:HGNC:10780]	no	no	no	no
ENSG00000177707	32	64	3	NECTIN3	111070071	111275563	nectin cell adhesion molecule 3 [Source:HGNC Symbol;Acc:HGNC:17664]	no	no	no	no
ENSG00000184208	32	64	22	C22orf46	41688877	41698136	chromosome 22 putative open reading frame 46 [Source:HGNC Symbol;Acc:HGNC:26294]	no	no	no	no
ENSG00000186792	32	64	3	HYAL3	50292831	50299405	hyaluronidase 3 [Source:HGNC Symbol;Acc:HGNC:5322]	no	no	no	no
ENSG00000273674	32	64	15	ENSG00000273674	50839875	50908603	novel transcript	no	no	no	no
ENSG00000283567	32	64	19	C19orf85	55463001	55464751	chromosome 19 open reading frame 85 [Source:HGNC Symbol;Acc:HGNC:53653]	no	no	no	no
ENSG00000183337	32	64	X	BCOR	40049815	40177329	BCL6 corepressor [Source:HGNC Symbol;Acc:HGNC:20893]	no	no	no	yes
ENSG00000253537	32	64	5	PCDHGA7	141382739	141512975	protocadherin gamma subfamily A, 7 [Source:HGNC Symbol;Acc:HGNC:8705]	no	no	no	no
ENSG00000095794	31	62	10	CREM	35126791	35212958	cAMP responsive element modulator [Source:HGNC Symbol;Acc:HGNC:2352]	no	no	no	no
ENSG00000116752	31	62	1	BCAS2	114567557	114581629	BCAS2 pre-mRNA processing factor [Source:HGNC Symbol;Acc:HGNC:975]	no	no	no	no
ENSG00000118194	31	62	1	TNNT2	201359008	201377764	troponin T2, cardiac type [Source:HGNC Symbol;Acc:HGNC:11949]	no	no	no	no
ENSG00000122481	31	62	1	RWDD3	95234210	95247225	RWD domain containing 3 [Source:HGNC Symbol;Acc:HGNC:21393]	no	no	no	no
ENSG00000126218	31	62	13	F10	113122799	113149529	coagulation factor X [Source:HGNC Symbol;Acc:HGNC:3528]	no	no	no	no
ENSG00000130700	31	62	20	GATA5	62463497	62475995	GATA binding protein 5 [Source:HGNC Symbol;Acc:HGNC:15802]	no	no	no	no
ENSG00000130830	31	62	X	MPP1	154778684	154821007	MAGUK p55 scaffold protein 1 [Source:HGNC Symbol;Acc:HGNC:7219]	no	no	no	yes
ENSG00000132872	31	62	18	SYT4	43267892	43277535	synaptotagmin 4 [Source:HGNC Symbol;Acc:HGNC:11512]	no	no	no	no
ENSG00000137877	31	62	15	SPTBN5	41848146	41894053	spectrin beta, non-erythrocytic 5 [Source:HGNC Symbol;Acc:HGNC:15680]	no	no	no	no
ENSG00000142627	31	62	1	EPHA2	16124337	16156069	EPH receptor A2 [Source:HGNC Symbol;Acc:HGNC:3386]	no	no	no	no
ENSG00000147010	31	62	X	SH3KBP1	19533977	19887600	SH3 domain containing kinase binding protein 1 [Source:HGNC Symbol;Acc:HGNC:13867]	no	no	no	yes
ENSG00000161057	31	62	7	PSMC2	103328570	103370346	proteasome 26S subunit, ATPase 2 [Source:HGNC Symbol;Acc:HGNC:9548]	no	no	no	no
ENSG00000162614	31	62	1	NEXN	77888513	77943895	nexilin F-actin binding protein [Source:HGNC Symbol;Acc:HGNC:29557]	no	no	no	no
ENSG00000166704	31	62	19	ZNF606	57977076	58003349	zinc finger protein 606 [Source:HGNC Symbol;Acc:HGNC:25879]	no	no	no	no
ENSG00000166863	31	62	12	TAC3	57010000	57028883	tachykinin precursor 3 [Source:HGNC Symbol;Acc:HGNC:11521]	no	no	no	no
ENSG00000167874	31	62	17	TMEM88	7855066	7856099	transmembrane protein 88 [Source:HGNC Symbol;Acc:HGNC:32371]	no	no	no	no
ENSG00000176654	31	62	12	NANOGP1	7892576	7898903	Nanog homeobox pseudogene 1 [Source:HGNC Symbol;Acc:HGNC:23099]	no	no	no	no
ENSG00000178538	31	62	8	CA8	60185412	60281400	carbonic anhydrase 8 [Source:HGNC Symbol;Acc:HGNC:1382]	no	no	no	no
ENSG00000186603	31	62	1	HPDL	45326895	45328710	4-hydroxyphenylpyruvate dioxygenase like [Source:HGNC Symbol;Acc:HGNC:28242]	no	no	no	no
ENSG00000187566	31	62	6	NHLRC1	18120440	18122677	NHL repeat containing E3 ubiquitin protein ligase 1 [Source:HGNC Symbol;Acc:HGNC:21576]	no	no	no	no
ENSG00000199024	31	62	20	MIR103A2	3917494	3917571	microRNA 103a-2 [Source:HGNC Symbol;Acc:HGNC:31491]	no	no	no	no
ENSG00000213347	31	62	5	MXD3	177301461	177312757	MAX dimerization protein 3 [Source:HGNC Symbol;Acc:HGNC:14008]	no	no	no	no
ENSG00000215440	31	62	20	NPEPL1	58689131	58719238	aminopeptidase like 1 [Source:HGNC Symbol;Acc:HGNC:16244]	no	no	no	no
ENSG00000225032	31	62	9	ENSG00000225032	127816066	127822520	novel transcript	no	no	no	no
ENSG00000226688	31	62	10	ENTPD1-AS1	95732976	96090250	ENTPD1 antisense RNA 1 [Source:HGNC Symbol;Acc:HGNC:45203]	no	no	no	no
ENSG00000229321	31	62	2	ENSG00000229321	206798325	206926876	novel transcript	no	no	no	no
ENSG00000237238	31	62	9	BMS1P10	63372803	63380011	BMS1 pseudogene 10 [Source:HGNC Symbol;Acc:HGNC:49154]	no	no	no	no
ENSG00000245694	31	62	16	CRNDE	54845189	54929189	colorectal neoplasia differentially expressed [Source:HGNC Symbol;Acc:HGNC:37078]	no	no	no	no
ENSG00000250420	31	62	5	AACSP1	178767204	178797611	acetoacetyl-CoA synthetase pseudogene 1 [Source:HGNC Symbol;Acc:HGNC:18226]	no	no	no	no
ENSG00000259959	31	62	4	ENSG00000259959	47840122	47844339	novel transcript	no	no	no	no
ENSG00000263711	31	62	18	LINC02864	73151241	73264480	long intergenic non-protein coding RNA 2864 [Source:HGNC Symbol;Acc:HGNC:54480]	no	no	no	no
ENSG00000269918	31	62	8	ENSG00000269918	11104691	11106704	novel transcript	no	no	no	no
ENSG00000273079	31	62	12	GRIN2B	13437942	13982002	glutamate ionotropic receptor NMDA type subunit 2B [Source:HGNC Symbol;Acc:HGNC:4586]	no	no	no	no
ENSG00000275180	31	62	12	ENSG00000275180	62603366	62604408	novel transcript	no	no	no	no
ENSG00000277883	31	62	X	NLRP3P1	107974078	107985008	NLR family pyrin domain containing 3 pseudogene 1 [Source:HGNC Symbol;Acc:HGNC:29886]	no	no	no	no
ENSG00000279278	31	62	22	ENSG00000279278	22264601	22273020	novel transcript	no	no	no	no
ENSG00000105419	31	62	19	MEIS3	47403124	47419527	Meis homeobox 3 [Source:HGNC Symbol;Acc:HGNC:29537]	no	no	no	no
ENSG00000106012	31	62	7	IQCE	2558972	2614733	IQ motif containing E [Source:HGNC Symbol;Acc:HGNC:29171]	no	no	no	no
ENSG00000118292	31	62	1	C1orf54	150268200	150280916	chromosome 1 open reading frame 54 [Source:HGNC Symbol;Acc:HGNC:26258]	no	no	no	no
ENSG00000140015	31	62	14	KCNH5	62699464	63102037	potassium voltage-gated channel subfamily H member 5 [Source:HGNC Symbol;Acc:HGNC:6254]	no	no	no	no
ENSG00000143748	31	62	1	NVL	224227334	224330189	nuclear VCP like [Source:HGNC Symbol;Acc:HGNC:8070]	no	no	no	no
ENSG00000146955	31	62	7	RAB19	140404058	140427974	RAB19, member RAS oncogene family [Source:HGNC Symbol;Acc:HGNC:19982]	no	no	no	no
ENSG00000149926	31	62	16	TLCD3B	30024427	30052978	TLC domain containing 3B [Source:HGNC Symbol;Acc:HGNC:25295]	no	no	no	no
ENSG00000164603	31	62	7	BMT2	112819147	112939875	base methyltransferase of 25S rRNA 2 homolog [Source:HGNC Symbol;Acc:HGNC:26475]	no	no	no	no
ENSG00000167513	31	62	16	CDT1	88803789	88809258	chromatin licensing and DNA replication factor 1 [Source:HGNC Symbol;Acc:HGNC:24576]	no	no	no	no
ENSG00000244045	31	62	17	TMEM199	28357642	28363683	transmembrane protein 199 [Source:HGNC Symbol;Acc:HGNC:18085]	no	no	no	no
ENSG00000095370	31	62	9	SH2D3C	127738317	127778710	SH2 domain containing 3C [Source:HGNC Symbol;Acc:HGNC:16884]	no	no	no	no
ENSG00000006712	30	60	19	PAF1	39385629	39391154	PAF1 homolog, Paf1/RNA polymerase II complex component [Source:HGNC Symbol;Acc:HGNC:25459]	no	no	no	no
ENSG00000095777	30	60	10	MYO3A	25934229	26212532	myosin IIIA [Source:HGNC Symbol;Acc:HGNC:7601]	no	no	no	no
ENSG00000104356	30	60	8	POP1	98117293	98159835	POP1 homolog, ribonuclease P/MRP subunit [Source:HGNC Symbol;Acc:HGNC:30129]	no	no	no	no
ENSG00000112081	30	60	6	SRSF3	36594353	36605600	serine and arginine rich splicing factor 3 [Source:HGNC Symbol;Acc:HGNC:10785]	no	no	no	no
ENSG00000112378	30	60	6	PERP	138088505	138107419	p53 apoptosis effector related to PMP22 [Source:HGNC Symbol;Acc:HGNC:17637]	no	no	no	no
ENSG00000127241	30	60	3	MASP1	187217282	187291980	MBL associated serine protease 1 [Source:HGNC Symbol;Acc:HGNC:6901]	no	no	no	no
ENSG00000137691	30	60	11	CFAP300	102047437	102084554	cilia and flagella associated protein 300 [Source:HGNC Symbol;Acc:HGNC:28188]	no	no	no	no
ENSG00000137821	30	60	15	LRRC49	70853239	71053658	leucine rich repeat containing 49 [Source:HGNC Symbol;Acc:HGNC:25965]	no	no	no	no
ENSG00000139174	30	60	12	PRICKLE1	42456757	42590355	prickle planar cell polarity protein 1 [Source:HGNC Symbol;Acc:HGNC:17019]	no	no	no	no
ENSG00000145354	30	60	4	CISD2	102868974	102892807	CDGSH iron sulfur domain 2 [Source:HGNC Symbol;Acc:HGNC:24212]	no	no	no	no
ENSG00000154240	30	60	17	CEP112	65635537	66192133	centrosomal protein 112 [Source:HGNC Symbol;Acc:HGNC:28514]	no	no	no	no
ENSG00000165675	30	60	X	ENOX2	130622325	130903234	ecto-NOX disulfide-thiol exchanger 2 [Source:HGNC Symbol;Acc:HGNC:2259]	no	no	no	yes
ENSG00000166387	30	60	11	PPFIBP2	7513298	7657127	PPFIA binding protein 2 [Source:HGNC Symbol;Acc:HGNC:9250]	no	no	no	no
ENSG00000167634	30	60	19	NLRP7	54923509	54966312	NLR family pyrin domain containing 7 [Source:HGNC Symbol;Acc:HGNC:22947]	no	no	no	no
ENSG00000168505	30	60	2	GBX2	236165236	236168386	gastrulation brain homeobox 2 [Source:HGNC Symbol;Acc:HGNC:4186]	no	no	no	no
ENSG00000198707	30	60	12	CEP290	88049016	88142099	centrosomal protein 290 [Source:HGNC Symbol;Acc:HGNC:29021]	no	no	no	no
ENSG00000214826	30	60	12	DDX12P	9418673	9448229	DEAD/H-box helicase 12, pseudogene [Source:HGNC Symbol;Acc:HGNC:2737]	no	no	no	no
ENSG00000230798	30	60	1	FOXD3-AS1	63320878	63324441	FOXD3 antisense RNA 1 [Source:HGNC Symbol;Acc:HGNC:40241]	no	no	no	no
ENSG00000264164	30	60	17	ENSG00000264164	32083179	32097065	bromodomain PHD finger transcription factor (BPTF) pseudogene	no	no	no	no
ENSG00000266967	30	60	17	AARSD1	42950526	42964498	alanyl-tRNA synthetase domain containing 1 [Source:HGNC Symbol;Acc:HGNC:28417]	no	no	no	no
ENSG00000267547	30	60	17	ENSG00000267547	35403837	35404373	novel transcript	no	no	no	no
ENSG00000279393	30	60	13	ENSG00000279393	28495468	28497267	TEC	no	no	no	no
ENSG00000010327	30	60	3	STAB1	52495338	52524495	stabilin 1 [Source:HGNC Symbol;Acc:HGNC:18628]	no	no	no	no
ENSG00000104894	30	60	19	CD37	49335171	49343335	CD37 molecule [Source:HGNC Symbol;Acc:HGNC:1666]	no	no	no	no
ENSG00000118515	30	60	6	SGK1	134169248	134318112	serum/glucocorticoid regulated kinase 1 [Source:HGNC Symbol;Acc:HGNC:10810]	no	no	no	no
ENSG00000123106	30	60	12	CCDC91	28133249	28581511	coiled-coil domain containing 91 [Source:HGNC Symbol;Acc:HGNC:24855]	no	no	no	no
ENSG00000141639	30	60	18	MAPK4	50560087	50731826	mitogen-activated protein kinase 4 [Source:HGNC Symbol;Acc:HGNC:6878]	no	no	no	no
ENSG00000163975	30	60	3	MELTF	196980590	197029835	melanotransferrin [Source:HGNC Symbol;Acc:HGNC:7037]	no	no	no	no
ENSG00000169093	30	60	X	ASMTL	1403139	1453762	acetylserotonin O-methyltransferase like [Source:HGNC Symbol;Acc:HGNC:751]	PAR1	no	no	no
ENSG00000205090	30	60	1	TMEM240	1534778	1540624	transmembrane protein 240 [Source:HGNC Symbol;Acc:HGNC:25186]	no	no	no	no
ENSG00000215483	30	60	13	LINC00598	40079106	40535807	long intergenic non-protein coding RNA 598 [Source:HGNC Symbol;Acc:HGNC:42770]	no	no	no	no
ENSG00000253706	30	60	8	ENSG00000253706	74798784	74866939	novel transcript, antisense to PI15	no	no	no	no
ENSG00000079337	29	58	12	RAPGEF3	47734363	47771040	Rap guanine nucleotide exchange factor 3 [Source:HGNC Symbol;Acc:HGNC:16629]	no	no	no	no
ENSG00000088756	29	58	18	ARHGAP28	6729716	6915716	Rho GTPase activating protein 28 [Source:HGNC Symbol;Acc:HGNC:25509]	no	no	no	no
ENSG00000099860	29	58	19	GADD45B	2476122	2478259	growth arrest and DNA damage inducible beta [Source:HGNC Symbol;Acc:HGNC:4096]	no	no	no	no
ENSG00000101246	29	58	20	ARFRP1	63698642	63708025	ADP ribosylation factor related protein 1 [Source:HGNC Symbol;Acc:HGNC:662]	no	no	no	no
ENSG00000102317	29	58	X	RBM3	48574449	48581162	RNA binding motif protein 3 [Source:HGNC Symbol;Acc:HGNC:9900]	no	no	yes	no
ENSG00000132906	29	58	1	CASP9	15490832	15526534	caspase 9 [Source:HGNC Symbol;Acc:HGNC:1511]	no	no	no	no
ENSG00000142611	29	58	1	PRDM16	3069168	3438621	PR/SET domain 16 [Source:HGNC Symbol;Acc:HGNC:14000]	no	no	no	no
ENSG00000145982	29	58	6	FARS2	5261044	5829192	phenylalanyl-tRNA synthetase 2, mitochondrial [Source:HGNC Symbol;Acc:HGNC:21062]	no	no	no	no
ENSG00000159202	29	58	17	UBE2Z	48908407	48929056	ubiquitin conjugating enzyme E2 Z [Source:HGNC Symbol;Acc:HGNC:25847]	no	no	no	no
ENSG00000164292	29	58	5	RHOBTB3	95713522	95824383	Rho related BTB domain containing 3 [Source:HGNC Symbol;Acc:HGNC:18757]	no	no	no	no
ENSG00000165449	29	58	10	SLC16A9	59650764	59736002	solute carrier family 16 member 9 [Source:HGNC Symbol;Acc:HGNC:23520]	no	no	no	no
ENSG00000171574	29	58	19	ZNF584	58401504	58431736	zinc finger protein 584 [Source:HGNC Symbol;Acc:HGNC:27318]	no	no	no	no
ENSG00000183145	29	58	21	RIPPLY3	37006150	37019662	ripply transcriptional repressor 3 [Source:HGNC Symbol;Acc:HGNC:3047]	no	no	no	no
ENSG00000187097	29	58	14	ENTPD5	73958010	74019399	ectonucleoside triphosphate diphosphohydrolase 5 (inactive) [Source:HGNC Symbol;Acc:HGNC:3367]	no	no	no	no
ENSG00000196296	29	58	16	ATP2A1	28878405	28904466	ATPase sarcoplasmic/endoplasmic reticulum Ca2+ transporting 1 [Source:HGNC Symbol;Acc:HGNC:811]	no	no	no	no
ENSG00000197462	29	58	7	ENSG00000197462	125917871	125933832	novel transcript	no	no	no	no
ENSG00000224945	29	58	9	ENSG00000224945	89088604	89109934	novel transcript	no	no	no	no
ENSG00000227827	29	58	16	PKD1P2	16356224	16377507	polycystin 1, transient receptor potential channel interacting pseudogene 2 [Source:HGNC Symbol;Acc:HGNC:30066]	no	no	no	no
ENSG00000237398	29	58	6	HLA-DPA3	33131216	33143325	major histocompatibility complex, class II, DP alpha 3 (pseudogene) [Source:HGNC Symbol;Acc:HGNC:19393]	no	no	no	no
ENSG00000248538	29	58	8	PPP1R3B-DT	9151695	9425524	PPP1R3B divergent transcript [Source:HGNC Symbol;Acc:HGNC:56150]	no	no	no	no
ENSG00000248605	29	58	5	ENSG00000248605	25404733	25445925	novel transcript	no	no	no	no
ENSG00000261175	29	58	16	LINC02188	86710122	86742083	long intergenic non-protein coding RNA 2188 [Source:HGNC Symbol;Acc:HGNC:53050]	no	no	no	no
ENSG00000013364	29	58	16	MVP	29820394	29848039	major vault protein [Source:HGNC Symbol;Acc:HGNC:7531]	no	no	no	no
ENSG00000056277	29	58	X	ZNF280C	130202707	130268899	zinc finger protein 280C [Source:HGNC Symbol;Acc:HGNC:25955]	no	no	yes	no
ENSG00000110107	29	58	11	PRPF19	60890547	60906585	pre-mRNA processing factor 19 [Source:HGNC Symbol;Acc:HGNC:17896]	no	no	no	no
ENSG00000121281	29	58	16	ADCY7	50246137	50318135	adenylate cyclase 7 [Source:HGNC Symbol;Acc:HGNC:238]	no	no	no	no
ENSG00000123700	29	58	17	KCNJ2	70168673	70180044	potassium inwardly rectifying channel subfamily J member 2 [Source:HGNC Symbol;Acc:HGNC:6263]	no	no	no	no
ENSG00000132386	29	58	17	SERPINF1	1762029	1777565	serpin family F member 1 [Source:HGNC Symbol;Acc:HGNC:8824]	no	no	no	no
ENSG00000136522	29	58	3	MRPL47	179588285	179604649	mitochondrial ribosomal protein L47 [Source:HGNC Symbol;Acc:HGNC:16652]	no	no	no	no
ENSG00000136928	29	58	9	GABBR2	98288109	98708935	gamma-aminobutyric acid type B receptor subunit 2 [Source:HGNC Symbol;Acc:HGNC:4507]	no	no	no	no
ENSG00000137720	29	58	11	C11orf1	111878935	111885975	chromosome 11 open reading frame 1 [Source:HGNC Symbol;Acc:HGNC:1163]	no	no	no	no
ENSG00000159063	29	58	11	ALG8	78095244	78139660	ALG8 alpha-1,3-glucosyltransferase [Source:HGNC Symbol;Acc:HGNC:23161]	no	no	no	no
ENSG00000174327	29	58	17	SLC16A13	7036015	7040117	solute carrier family 16 member 13 [Source:HGNC Symbol;Acc:HGNC:31037]	no	no	no	no
ENSG00000177359	29	58	12	ENSG00000177359	31112236	31201235	ovostatin 2	no	no	no	no
ENSG00000188010	29	58	2	MORN2	38875976	38929072	MORN repeat containing 2 [Source:HGNC Symbol;Acc:HGNC:30166]	no	no	no	no
ENSG00000197360	29	58	19	ZNF98	22391019	22532485	zinc finger protein 98 [Source:HGNC Symbol;Acc:HGNC:13174]	no	no	no	no
ENSG00000237638	29	58	2	LINC02245	64901840	65056226	long intergenic non-protein coding RNA 2245 [Source:HGNC Symbol;Acc:HGNC:53134]	no	no	no	no
ENSG00000251129	29	58	4	LINC02506	31997376	32228543	long intergenic non-protein coding RNA 2506 [Source:HGNC Symbol;Acc:HGNC:53495]	no	no	no	no
ENSG00000273142	29	58	7	LINC02604	66902857	66906297	long intergenic non-protein coding RNA 2604 [Source:HGNC Symbol;Acc:HGNC:53972]	no	no	no	no
ENSG00000279145	29	58	15	ENSG00000279145	55171378	55176739	TEC	no	no	no	no
ENSG00000287222	29	58	8	ENSG00000287222	143829518	143832861	novel transcript, antisense to PUF60	no	no	no	no
ENSG00000174021	29	58	1	GNG5	84498323	84506581	G protein subunit gamma 5 [Source:HGNC Symbol;Acc:HGNC:4408]	no	no	no	no
ENSG00000091129	29	58	7	NRCAM	108147623	108456717	neuronal cell adhesion molecule [Source:HGNC Symbol;Acc:HGNC:7994]	no	no	no	no
ENSG00000143878	29	58	2	RHOB	20447074	20449440	ras homolog family member B [Source:HGNC Symbol;Acc:HGNC:668]	no	no	no	no
ENSG00000250131	29	58	4	AGA-DT	177442519	177681381	AGA divergent transcript [Source:HGNC Symbol;Acc:HGNC:27730]	no	no	no	no
ENSG00000254536	29	58	10	ENSG00000254536	133380017	133420271	novel protein	no	no	no	no
ENSG00000101977	28	56	X	MCF2	139581770	139708216	MCF.2 cell line derived transforming sequence [Source:HGNC Symbol;Acc:HGNC:6940]	no	no	no	yes
ENSG00000102445	28	56	13	RUBCNL	46334681	46438190	rubicon like autophagy enhancer [Source:HGNC Symbol;Acc:HGNC:20420]	no	no	no	no
ENSG00000102678	28	56	13	FGF9	21671073	21704498	fibroblast growth factor 9 [Source:HGNC Symbol;Acc:HGNC:3687]	no	no	no	no
ENSG00000105792	28	56	7	CFAP69	90245174	90311063	cilia and flagella associated protein 69 [Source:HGNC Symbol;Acc:HGNC:26107]	no	no	no	no
ENSG00000115758	28	56	2	ODC1	10439968	10448327	ornithine decarboxylase 1 [Source:HGNC Symbol;Acc:HGNC:8109]	no	no	no	no
ENSG00000120784	28	56	19	ZFP30	37613749	37692337	ZFP30 zinc finger protein [Source:HGNC Symbol;Acc:HGNC:29555]	no	no	no	no
ENSG00000130182	28	56	16	ZSCAN10	3088890	3099295	zinc finger and SCAN domain containing 10 [Source:HGNC Symbol;Acc:HGNC:12997]	no	no	no	no
ENSG00000131203	28	56	8	IDO1	39902275	39928790	indoleamine 2,3-dioxygenase 1 [Source:HGNC Symbol;Acc:HGNC:6059]	no	no	no	no
ENSG00000132164	28	56	3	SLC6A11	10816201	10940714	solute carrier family 6 member 11 [Source:HGNC Symbol;Acc:HGNC:11044]	no	no	no	no
ENSG00000151689	28	56	2	INPP1	190343570	190371665	inositol polyphosphate-1-phosphatase [Source:HGNC Symbol;Acc:HGNC:6071]	no	no	no	no
ENSG00000162344	28	56	11	FGF19	69698238	69704022	fibroblast growth factor 19 [Source:HGNC Symbol;Acc:HGNC:3675]	no	no	no	no
ENSG00000162687	28	56	1	KCNT2	196225779	196609225	potassium sodium-activated channel subfamily T member 2 [Source:HGNC Symbol;Acc:HGNC:18866]	no	no	no	no
ENSG00000162944	28	56	2	RFTN2	197568224	197676045	raftlin family member 2 [Source:HGNC Symbol;Acc:HGNC:26402]	no	no	no	no
ENSG00000171951	28	56	2	SCG2	223596940	223602361	secretogranin II [Source:HGNC Symbol;Acc:HGNC:10575]	no	no	no	no
ENSG00000175893	28	56	9	ZDHHC21	14611071	14693432	zinc finger DHHC-type palmitoyltransferase 21 [Source:HGNC Symbol;Acc:HGNC:20750]	no	no	no	no
ENSG00000178752	28	56	2	ERFE	238158970	238168900	erythroferrone [Source:HGNC Symbol;Acc:HGNC:26727]	no	no	no	no
ENSG00000185304	28	56	2	RGPD2	87755960	87825796	RANBP2 like and GRIP domain containing 2 [Source:HGNC Symbol;Acc:HGNC:32415]	no	no	no	no
ENSG00000188185	28	56	7	LINC00265	39733430	39793092	long intergenic non-protein coding RNA 265 [Source:HGNC Symbol;Acc:HGNC:28019]	no	no	no	no
ENSG00000188385	28	56	10	JAKMIP3	132036336	132184858	Janus kinase and microtubule interacting protein 3 [Source:HGNC Symbol;Acc:HGNC:23523]	no	no	no	no
ENSG00000215458	28	56	21	AATBC	43805758	43812567	apoptosis associated transcript in bladder cancer [Source:HGNC Symbol;Acc:HGNC:51526]	no	no	no	no
ENSG00000230590	28	56	X	FTX	73940435	74293574	FTX transcript, XIST regulator [Source:HGNC Symbol;Acc:HGNC:37190]	no	no	no	yes
ENSG00000247679	28	56	5	ENSG00000247679	177611240	177619754	novel transcript	no	no	no	no
ENSG00000260078	28	56	16	MPHOSPH10P1	53364982	53373083	MPHOSPH10 pseudogene 1 [Source:HGNC Symbol;Acc:HGNC:55687]	no	no	no	no
ENSG00000263874	28	56	17	LINC00672	38925168	38929384	long intergenic non-protein coding RNA 672 [Source:HGNC Symbol;Acc:HGNC:44353]	no	no	no	no
ENSG00000269044	28	56	19	ENSG00000269044	16633797	16635269	novel transcript, sense intronic C19orf42	no	no	no	no
ENSG00000273044	28	56	22	ENSG00000273044	35526932	35527415	novel transcript	no	no	no	no
ENSG00000099783	28	56	19	HNRNPM	8444767	8489114	heterogeneous nuclear ribonucleoprotein M [Source:HGNC Symbol;Acc:HGNC:5046]	no	no	no	no
ENSG00000103260	28	56	16	METRN	715118	719655	meteorin, glial cell differentiation regulator [Source:HGNC Symbol;Acc:HGNC:14151]	no	no	no	no
ENSG00000113356	28	56	5	POLR3G	90471748	90514557	RNA polymerase III subunit G [Source:HGNC Symbol;Acc:HGNC:30075]	no	no	no	no
ENSG00000123739	28	56	4	PLA2G12A	109709989	109730070	phospholipase A2 group XIIA [Source:HGNC Symbol;Acc:HGNC:18554]	no	no	no	no
ENSG00000124233	28	56	20	SEMG1	45207033	45209768	semenogelin 1 [Source:HGNC Symbol;Acc:HGNC:10742]	no	no	no	no
ENSG00000131263	28	56	X	RLIM	74582976	74614624	ring finger protein, LIM domain interacting [Source:HGNC Symbol;Acc:HGNC:13429]	no	no	no	yes
ENSG00000138814	28	56	4	PPP3CA	101023409	101348278	protein phosphatase 3 catalytic subunit alpha [Source:HGNC Symbol;Acc:HGNC:9314]	no	no	no	no
ENSG00000166450	28	56	15	PRTG	55611544	55743152	protogenin [Source:HGNC Symbol;Acc:HGNC:26373]	no	no	no	no
ENSG00000183166	28	56	7	CALN1	71779491	72447151	calneuron 1 [Source:HGNC Symbol;Acc:HGNC:13248]	no	no	no	no
ENSG00000186470	28	56	6	BTN3A2	26365159	26378320	butyrophilin subfamily 3 member A2 [Source:HGNC Symbol;Acc:HGNC:1139]	no	no	no	no
ENSG00000188730	28	56	7	VWC2	49773638	49921950	von Willebrand factor C domain containing 2 [Source:HGNC Symbol;Acc:HGNC:30200]	no	no	no	no
ENSG00000232301	28	56	7	LNCPRESS1	101299558	101301346	lncRNA p53 regulated and ESC associated 1 [Source:HGNC Symbol;Acc:HGNC:52746]	no	no	no	no
ENSG00000265107	28	56	1	GJA5	147756199	147773362	gap junction protein alpha 5 [Source:HGNC Symbol;Acc:HGNC:4279]	no	no	no	no
ENSG00000268696	28	56	19	ZNF723	22832291	22858667	zinc finger protein 723 [Source:HGNC Symbol;Acc:HGNC:32286]	no	no	no	no
ENSG00000188921	28	56	9	HACD4	20999509	21031640	3-hydroxyacyl-CoA dehydratase 4 [Source:HGNC Symbol;Acc:HGNC:20920]	no	no	no	no
ENSG00000189195	28	56	1	BTBD8	92080305	92184725	BTB domain containing 8 [Source:HGNC Symbol;Acc:HGNC:21019]	no	no	no	no
ENSG00000004777	28	56	19	ARHGAP33	35774532	35788822	Rho GTPase activating protein 33 [Source:HGNC Symbol;Acc:HGNC:23085]	no	no	no	no
ENSG00000155511	28	56	5	GRIA1	153489615	153813869	glutamate ionotropic receptor AMPA type subunit 1 [Source:HGNC Symbol;Acc:HGNC:4571]	no	no	no	no
ENSG00000183605	28	56	10	SFXN4	119140767	119165714	sideroflexin 4 [Source:HGNC Symbol;Acc:HGNC:16088]	no	no	no	no
ENSG00000100307	28	56	22	CBX7	39120167	39152680	chromobox 7 [Source:HGNC Symbol;Acc:HGNC:1557]	no	no	no	no
ENSG00000154928	28	56	3	EPHB1	134795260	135260467	EPH receptor B1 [Source:HGNC Symbol;Acc:HGNC:3392]	no	no	no	no
ENSG00000006071	27	54	11	ABCC8	17392498	17476894	ATP binding cassette subfamily C member 8 [Source:HGNC Symbol;Acc:HGNC:59]	no	no	no	no
ENSG00000063015	27	54	17	SEZ6	28954901	29006440	seizure related 6 homolog [Source:HGNC Symbol;Acc:HGNC:15955]	no	no	no	no
ENSG00000068079	27	54	17	IFI35	43006740	43014456	interferon induced protein 35 [Source:HGNC Symbol;Acc:HGNC:5399]	no	no	no	no
ENSG00000101144	27	54	20	BMP7	57168753	57266641	bone morphogenetic protein 7 [Source:HGNC Symbol;Acc:HGNC:1074]	no	no	no	no
ENSG00000129682	27	54	X	FGF13	138614727	139222777	fibroblast growth factor 13 [Source:HGNC Symbol;Acc:HGNC:3670]	no	no	yes	no
ENSG00000139793	27	54	13	MBNL2	97221434	97394120	muscleblind like splicing regulator 2 [Source:HGNC Symbol;Acc:HGNC:16746]	no	no	no	no
ENSG00000139998	27	54	14	RAB15	64945814	64973226	RAB15, member RAS oncogene family [Source:HGNC Symbol;Acc:HGNC:20150]	no	no	no	no
ENSG00000140398	27	54	15	NEIL1	75346955	75357115	nei like DNA glycosylase 1 [Source:HGNC Symbol;Acc:HGNC:18448]	no	no	no	no
ENSG00000145358	27	54	4	DDIT4L	100185870	100190782	DNA damage inducible transcript 4 like [Source:HGNC Symbol;Acc:HGNC:30555]	no	no	no	no
ENSG00000158019	27	54	2	BABAM2	27889941	28338901	BRISC and BRCA1 A complex member 2 [Source:HGNC Symbol;Acc:HGNC:1106]	no	no	no	no
ENSG00000167615	27	54	19	LENG8	54448887	54462016	leukocyte receptor cluster member 8 [Source:HGNC Symbol;Acc:HGNC:15500]	no	no	no	no
ENSG00000179630	27	54	13	LACC1	43879284	43893932	laccase domain containing 1 [Source:HGNC Symbol;Acc:HGNC:26789]	no	no	no	no
ENSG00000183718	27	54	5	TRIM52	181254077	181261150	tripartite motif containing 52 [Source:HGNC Symbol;Acc:HGNC:19024]	no	no	no	no
ENSG00000183850	27	54	19	ZNF730	23075210	23147221	zinc finger protein 730 [Source:HGNC Symbol;Acc:HGNC:32470]	no	no	no	no
ENSG00000185386	27	54	22	MAPK11	50263713	50270767	mitogen-activated protein kinase 11 [Source:HGNC Symbol;Acc:HGNC:6873]	no	no	no	no
ENSG00000198440	27	54	19	ZNF583	56397966	56436035	zinc finger protein 583 [Source:HGNC Symbol;Acc:HGNC:26427]	no	no	no	no
ENSG00000227124	27	54	3	ZNF717	75678660	75785583	zinc finger protein 717 [Source:HGNC Symbol;Acc:HGNC:29448]	no	no	no	no
ENSG00000237094	27	54	1	ENSG00000237094	485026	485208	pseudogene similar to part of septin 14 SEPT14	no	no	no	no
ENSG00000261490	27	54
ENSG00000271533	27	54	X	ENSG00000271533	74209976	74213660	novel transcript, sense intronic FTX	no	no	no	yes
ENSG00000274114	27	54	17	ALOX15P1	6657214	6661413	arachidonate 15-lipoxygenase pseudogene 1 [Source:HGNC Symbol;Acc:HGNC:13742]	no	no	no	no
ENSG00000277287	27	54	20	ENSG00000277287	3239705	3245382	novel transcript	no	no	no	no
ENSG00000287735	27	54	14	ENSG00000287735	20317949	20319707	novel transcript, antisense to CCNB1IP1	no	no	no	no
ENSG00000033011	27	54	16	ALG1	5033702	5087379	ALG1 chitobiosyldiphosphodolichol beta-mannosyltransferase [Source:HGNC Symbol;Acc:HGNC:18294]	no	no	no	no
ENSG00000087087	27	54	7	SRRT	100875103	100888664	serrate, RNA effector molecule [Source:HGNC Symbol;Acc:HGNC:24101]	no	no	no	no
ENSG00000144476	27	54	2	ACKR3	236567787	236582354	atypical chemokine receptor 3 [Source:HGNC Symbol;Acc:HGNC:23692]	no	no	no	no
ENSG00000175264	27	54	11	CHST1	45647689	45665622	carbohydrate sulfotransferase 1 [Source:HGNC Symbol;Acc:HGNC:1969]	no	no	no	no
ENSG00000185201	27	54	11	IFITM2	303655	309397	interferon induced transmembrane protein 2 [Source:HGNC Symbol;Acc:HGNC:5413]	no	no	no	no
ENSG00000185621	27	54	3	LMLN	197960200	198043720	leishmanolysin like peptidase [Source:HGNC Symbol;Acc:HGNC:15991]	no	no	no	no
ENSG00000189007	27	54	6	ADAT2	143422832	143450695	adenosine deaminase tRNA specific 2 [Source:HGNC Symbol;Acc:HGNC:21172]	no	no	no	no
ENSG00000189136	27	54	15	UBE2Q2P1	84526781	84570700	UBE2Q2 pseudogene 1 [Source:HGNC Symbol;Acc:HGNC:37439]	no	no	no	no
ENSG00000210144	27	54	MT	MT-TY	5826	5891	mitochondrially encoded tRNA-Tyr (UAU/C) [Source:HGNC Symbol;Acc:HGNC:7502]	no	no	no	no
ENSG00000267886	27	54	19	ENSG00000267886	23075201	23100361	novel transcript	no	no	no	no
ENSG00000276564	27	54	16	ENSG00000276564	14150833	14153235	novel transcript	no	no	no	no
ENSG00000264577	27	54	17	ENSG00000264577	28721487	28722877	novel transcript, antisense to RPL23A	no	no	no	no
ENSG00000197461	27	54	7	PDGFA	497258	520296	platelet derived growth factor subunit A [Source:HGNC Symbol;Acc:HGNC:8799]	no	no	no	no
ENSG00000011347	27	54	11	SYT7	61513714	61581148	synaptotagmin 7 [Source:HGNC Symbol;Acc:HGNC:11514]	no	no	no	no
ENSG00000111845	27	54	6	PAK1IP1	10694972	10709782	PAK1 interacting protein 1 [Source:HGNC Symbol;Acc:HGNC:20882]	no	no	no	no
ENSG00000075035	26	52	12	WSCD2	108129288	108250537	WSC domain containing 2 [Source:HGNC Symbol;Acc:HGNC:29117]	no	no	no	no
ENSG00000099256	26	52	10	PRTFDC1	24848614	24952606	phosphoribosyl transferase domain containing 1 [Source:HGNC Symbol;Acc:HGNC:23333]	no	no	no	no
ENSG00000102452	26	52	13	NALCN	101053776	101416508	sodium leak channel, non-selective [Source:HGNC Symbol;Acc:HGNC:19082]	no	no	no	no
ENSG00000112559	26	52	6	MDFI	41636882	41654244	MyoD family inhibitor [Source:HGNC Symbol;Acc:HGNC:6967]	no	no	no	no
ENSG00000122674	26	52	7	CCZ1	5898725	5926550	CCZ1 homolog, vacuolar protein trafficking and biogenesis associated [Source:HGNC Symbol;Acc:HGNC:21691]	no	no	no	no
ENSG00000123609	26	52	2	NMI	151270470	151289894	N-myc and STAT interactor [Source:HGNC Symbol;Acc:HGNC:7854]	no	no	no	no
ENSG00000128342	26	52	22	LIF	30240453	30246759	LIF interleukin 6 family cytokine [Source:HGNC Symbol;Acc:HGNC:6596]	no	no	no	no
ENSG00000129991	26	52	19	TNNI3	55151767	55157773	troponin I3, cardiac type [Source:HGNC Symbol;Acc:HGNC:11947]	no	no	no	no
ENSG00000135835	26	52	1	KIAA1614	180912897	180951614	KIAA1614 [Source:HGNC Symbol;Acc:HGNC:29327]	no	no	no	no
ENSG00000136153	26	52	13	LMO7	75620434	75859870	LIM domain 7 [Source:HGNC Symbol;Acc:HGNC:6646]	no	no	no	no
ENSG00000151650	26	52	10	VENTX	133237855	133241928	VENT homeobox [Source:HGNC Symbol;Acc:HGNC:13639]	no	no	no	no
ENSG00000155115	26	52	6	GTF3C6	110958706	110967890	general transcription factor IIIC subunit 6 [Source:HGNC Symbol;Acc:HGNC:20872]	no	no	no	no
ENSG00000162148	26	52	11	PPP1R32	61481120	61490931	protein phosphatase 1 regulatory subunit 32 [Source:HGNC Symbol;Acc:HGNC:28869]	no	no	no	no
ENSG00000164265	26	52	5	SCGB3A2	147870682	147882191	secretoglobin family 3A member 2 [Source:HGNC Symbol;Acc:HGNC:18391]	no	no	no	no
ENSG00000167695	26	52	17	TLCD3A	732412	742968	TLC domain containing 3A [Source:HGNC Symbol;Acc:HGNC:29646]	no	no	no	no
ENSG00000167711	26	52	17	SERPINF2	1742836	1755265	serpin family F member 2 [Source:HGNC Symbol;Acc:HGNC:9075]	no	no	no	no
ENSG00000175104	26	52	11	TRAF6	36483769	36510272	TNF receptor associated factor 6 [Source:HGNC Symbol;Acc:HGNC:12036]	no	no	no	no
ENSG00000197870	26	52	12	PRB3	11265914	11269707	proline rich protein BstNI subfamily 3 [Source:HGNC Symbol;Acc:HGNC:9339]	no	no	no	no
ENSG00000212719	26	52	17	LINC02693	21428263	21574517	long intergenic non-protein coding RNA 2693 [Source:HGNC Symbol;Acc:HGNC:27904]	no	no	no	no
ENSG00000214029	26	52	12	ZNF891	133104779	133130274	zinc finger protein 891 [Source:HGNC Symbol;Acc:HGNC:38709]	no	no	no	no
ENSG00000238105	26	52	12	GOLGA2P5	100156621	100173159	GOLGA2 pseudogene 5 [Source:HGNC Symbol;Acc:HGNC:25315]	no	no	no	no
ENSG00000249715	26	52	2	FER1L5	96642737	96704887	fer-1 like family member 5 [Source:HGNC Symbol;Acc:HGNC:19044]	no	no	no	no
ENSG00000251450	26	52	5	RASGRF2-AS1	80947694	80960907	RASGRF2 antisense RNA 1 [Source:HGNC Symbol;Acc:HGNC:40499]	no	no	no	no
ENSG00000256232	26	52	12	LINC02387	31363481	31369301	long intergenic non-protein coding RNA 2387 [Source:HGNC Symbol;Acc:HGNC:53313]	no	no	no	no
ENSG00000280058	26	52
ENSG00000067365	26	52	16	METTL22	8621683	8649654	methyltransferase 22, Kin17 lysine [Source:HGNC Symbol;Acc:HGNC:28368]	no	no	no	no
ENSG00000100554	26	52	14	ATP6V1D	67294371	67360265	ATPase H+ transporting V1 subunit D [Source:HGNC Symbol;Acc:HGNC:13527]	no	no	no	no
ENSG00000116785	26	52	1	CFHR3	196774813	196795407	complement factor H related 3 [Source:HGNC Symbol;Acc:HGNC:16980]	no	no	no	no
ENSG00000126583	26	52	19	PRKCG	53879190	53907652	protein kinase C gamma [Source:HGNC Symbol;Acc:HGNC:9402]	no	no	no	no
ENSG00000130589	26	52	20	HELZ2	63558086	63574239	helicase with zinc finger 2 [Source:HGNC Symbol;Acc:HGNC:30021]	no	no	no	no
ENSG00000138190	26	52	10	EXOC6	92826831	93059493	exocyst complex component 6 [Source:HGNC Symbol;Acc:HGNC:23196]	no	no	no	no
ENSG00000143297	26	52	1	FCRL5	157513377	157552515	Fc receptor like 5 [Source:HGNC Symbol;Acc:HGNC:18508]	no	no	no	no
ENSG00000156697	26	52	X	UTP14A	129906121	129929761	UTP14A small subunit processome component [Source:HGNC Symbol;Acc:HGNC:10665]	no	no	no	yes
ENSG00000176396	26	52	19	EID2	39538707	39540161	EP300 interacting inhibitor of differentiation 2 [Source:HGNC Symbol;Acc:HGNC:28292]	no	no	no	no
ENSG00000177963	26	52	11	RIC8A	207708	215113	RIC8 guanine nucleotide exchange factor A [Source:HGNC Symbol;Acc:HGNC:29550]	no	no	no	no
ENSG00000188611	26	52	10	ASAH2	50182778	50279720	N-acylsphingosine amidohydrolase 2 [Source:HGNC Symbol;Acc:HGNC:18860]	no	no	no	no
ENSG00000196502	26	52	16	SULT1A1	28605196	28614279	sulfotransferase family 1A member 1 [Source:HGNC Symbol;Acc:HGNC:11453]	no	no	no	no
ENSG00000205771	26	52	15	CATSPER2P1	43727181	43745165	cation channel sperm associated 2 pseudogene 1 [Source:HGNC Symbol;Acc:HGNC:31054]	no	no	no	no
ENSG00000225972	26	52	1	MTND1P23	629062	629433	MT-ND1 pseudogene 23 [Source:HGNC Symbol;Acc:HGNC:42092]	no	no	no	no
ENSG00000230530	26	52	3	LIMD1-AS1	45676369	45689200	LIMD1 antisense RNA 1 [Source:HGNC Symbol;Acc:HGNC:44107]	no	no	no	no
ENSG00000258484	26	52	15	SPESP1	68818221	68946811	sperm equatorial segment protein 1 [Source:HGNC Symbol;Acc:HGNC:15570]	no	no	no	no
ENSG00000277117	26	52	21	ENSG00000277117	5022531	5036771	novel protein, similar to inducible T-cell co-stimulator ligand ICOSLG	no	no	no	no
ENSG00000231806	26	52	9	PCAT7	94555054	94603990	prostate cancer associated transcript 7 [Source:HGNC Symbol;Acc:HGNC:48824]	no	no	no	no
ENSG00000020577	26	52	14	SAMD4A	54566117	54793315	sterile alpha motif domain containing 4A [Source:HGNC Symbol;Acc:HGNC:23023]	no	no	no	no
ENSG00000110583	26	52	11	NAA40	63938959	63957319	N-alpha-acetyltransferase 40, NatD catalytic subunit [Source:HGNC Symbol;Acc:HGNC:25845]	no	no	no	no
ENSG00000151892	26	52	10	GFRA1	116056925	116276803	GDNF family receptor alpha 1 [Source:HGNC Symbol;Acc:HGNC:4243]	no	no	no	no
ENSG00000183018	26	52	17	SPNS2	4498881	4539035	sphingolipid transporter 2 [Source:HGNC Symbol;Acc:HGNC:26992]	no	no	no	no
ENSG00000187068	26	52	3	C3orf70	185076838	185153060	chromosome 3 open reading frame 70 [Source:HGNC Symbol;Acc:HGNC:33731]	no	no	no	no
ENSG00000119865	26	52	2	CNRIP1	68284171	68320051	cannabinoid receptor interacting protein 1 [Source:HGNC Symbol;Acc:HGNC:24546]	no	no	no	no
ENSG00000176049	26	52	5	JAKMIP2	147585438	147782775	janus kinase and microtubule interacting protein 2 [Source:HGNC Symbol;Acc:HGNC:29067]	no	no	no	no
ENSG00000018236	25	50	12	CNTN1	40692439	41072415	contactin 1 [Source:HGNC Symbol;Acc:HGNC:2171]	no	no	no	no
ENSG00000026103	25	50	10	FAS	88953813	89029605	Fas cell surface death receptor [Source:HGNC Symbol;Acc:HGNC:11920]	no	no	no	no
ENSG00000112280	25	50	6	COL9A1	70216040	70303084	collagen type IX alpha 1 chain [Source:HGNC Symbol;Acc:HGNC:2217]	no	no	no	no
ENSG00000115414	25	50	2	FN1	215360440	215436073	fibronectin 1 [Source:HGNC Symbol;Acc:HGNC:3778]	no	no	no	no
ENSG00000118523	25	50	6	CCN2	131948176	131951372	cellular communication network factor 2 [Source:HGNC Symbol;Acc:HGNC:2500]	no	no	no	no
ENSG00000132394	25	50	3	EEFSEC	128153481	128408646	eukaryotic elongation factor, selenocysteine-tRNA specific [Source:HGNC Symbol;Acc:HGNC:24614]	no	no	no	no
ENSG00000169282	25	50	3	KCNAB1	156037701	156539138	potassium voltage-gated channel subfamily A regulatory beta subunit 1 [Source:HGNC Symbol;Acc:HGNC:6228]	no	no	no	no
ENSG00000174529	25	50	1	TMEM81	205083129	205084460	transmembrane protein 81 [Source:HGNC Symbol;Acc:HGNC:32349]	no	no	no	no
ENSG00000178882	25	50	12	RFLNA	123973241	124316024	refilin A [Source:HGNC Symbol;Acc:HGNC:27051]	no	no	no	no
ENSG00000181798	25	50	2	LINC00471	231508420	231514396	long intergenic non-protein coding RNA 471 [Source:HGNC Symbol;Acc:HGNC:28668]	no	no	no	no
ENSG00000187650	25	50	19	VMAC	5904872	5910853	vimentin type intermediate filament associated coiled-coil protein [Source:HGNC Symbol;Acc:HGNC:33803]	no	no	no	no
ENSG00000188153	25	50	X	COL4A5	108439838	108697545	collagen type IV alpha 5 chain [Source:HGNC Symbol;Acc:HGNC:2207]	no	no	no	yes
ENSG00000203739	25	50	1	PRDX6-AS1	173417793	173489407	PRDX6 antisense RNA 1 [Source:HGNC Symbol;Acc:HGNC:54870]	no	no	no	no
ENSG00000213073	25	50	6	CHP1P2	160093423	160093993	CHP1 pseudogene 2 [Source:HGNC Symbol;Acc:HGNC:54896]	no	no	no	no
ENSG00000213612	25	50	9	FAM220CP	97121659	97122489	family with sequence similarity 220 member C, pseudogene [Source:HGNC Symbol;Acc:HGNC:43640]	no	no	no	no
ENSG00000248329	25	50	4	APELA	164877178	164898965	apelin receptor early endogenous ligand [Source:HGNC Symbol;Acc:HGNC:48925]	no	no	no	no
ENSG00000258417	25	50	8	ENSG00000258417	132024238	132085655	novel protein	no	no	no	no
ENSG00000074219	25	50	19	TEAD2	49340595	49362457	TEA domain transcription factor 2 [Source:HGNC Symbol;Acc:HGNC:11715]	no	no	no	no
ENSG00000100300	25	50	22	TSPO	43151547	43163242	translocator protein [Source:HGNC Symbol;Acc:HGNC:1158]	no	no	no	no
ENSG00000100664	25	50	14	EIF5	103333544	103345025	eukaryotic translation initiation factor 5 [Source:HGNC Symbol;Acc:HGNC:3299]	no	no	no	no
ENSG00000101493	25	50	18	ZNF516	76357682	76495242	zinc finger protein 516 [Source:HGNC Symbol;Acc:HGNC:28990]	no	no	no	no
ENSG00000111684	25	50	12	LPCAT3	6976185	7018477	lysophosphatidylcholine acyltransferase 3 [Source:HGNC Symbol;Acc:HGNC:30244]	no	no	no	no
ENSG00000146352	25	50	6	CLVS2	122996235	123072925	clavesin 2 [Source:HGNC Symbol;Acc:HGNC:23046]	no	no	no	no
ENSG00000155085	25	50	6	AK9	109492855	109691217	adenylate kinase 9 [Source:HGNC Symbol;Acc:HGNC:33814]	no	no	no	no
ENSG00000158104	25	50	12	HPD	121839527	121863596	4-hydroxyphenylpyruvate dioxygenase [Source:HGNC Symbol;Acc:HGNC:5147]	no	no	no	no
ENSG00000164961	25	50	8	WASHC5	125024260	125091819	WASH complex subunit 5 [Source:HGNC Symbol;Acc:HGNC:28984]	no	no	no	no
ENSG00000196972	25	50	X	SMIM10L2B	135094985	135098712	small integral membrane protein 10 like 2B [Source:HGNC Symbol;Acc:HGNC:34500]	no	no	no	no
ENSG00000221867	25	50	X	MAGEA3	152698767	152702347	MAGE family member A3 [Source:HGNC Symbol;Acc:HGNC:6801]	no	no	no	no
ENSG00000233098	25	50	17	CCDC144NL-AS1	20868433	21002276	CCDC144NL antisense RNA 1 [Source:HGNC Symbol;Acc:HGNC:51340]	no	no	no	no
ENSG00000251533	25	50	14	LINC00605	103187221	103189028	long intergenic non-protein coding RNA 605 [Source:HGNC Symbol;Acc:HGNC:43928]	no	no	no	no
ENSG00000253368	25	50	1	TRNP1	26993692	27000886	TMF1 regulated nuclear protein 1 [Source:HGNC Symbol;Acc:HGNC:34348]	no	no	no	no
ENSG00000276547	25	50	5	PCDHGB5	141397947	141512975	protocadherin gamma subfamily B, 5 [Source:HGNC Symbol;Acc:HGNC:8712]	no	no	no	no
ENSG00000198300	25	50	19	PEG3	56810077	56840728	paternally expressed 3 [Source:HGNC Symbol;Acc:HGNC:8826]	no	no	no	no
ENSG00000136014	25	50	12	USP44	95516560	95551476	ubiquitin specific peptidase 44 [Source:HGNC Symbol;Acc:HGNC:20064]	no	no	no	no
ENSG00000137760	25	50	11	ALKBH8	107502727	107565742	alkB homolog 8, tRNA methyltransferase [Source:HGNC Symbol;Acc:HGNC:25189]	no	no	no	no
ENSG00000168356	25	50	3	SCN11A	38845764	39052157	sodium voltage-gated channel alpha subunit 11 [Source:HGNC Symbol;Acc:HGNC:10583]	no	no	no	no
ENSG00000130935	25	50	17	NOL11	67717931	67744531	nucleolar protein 11 [Source:HGNC Symbol;Acc:HGNC:24557]	no	no	no	no
ENSG00000142871	25	50	1	CCN1	85580761	85584589	cellular communication network factor 1 [Source:HGNC Symbol;Acc:HGNC:2654]	no	no	no	no
ENSG00000143401	25	50	1	ANP32E	150218417	150236156	acidic nuclear phosphoprotein 32 family member E [Source:HGNC Symbol;Acc:HGNC:16673]	no	no	no	no
ENSG00000226067	25	50	1	LINC00623	120913184	121009291	long intergenic non-protein coding RNA 623 [Source:HGNC Symbol;Acc:HGNC:44252]	no	no	no	no
ENSG00000068137	24	48	17	PLEKHH3	42667914	42676994	pleckstrin homology, MyTH4 and FERM domain containing H3 [Source:HGNC Symbol;Acc:HGNC:26105]	no	no	no	no
ENSG00000106976	24	48	9	DNM1	128191655	128255248	dynamin 1 [Source:HGNC Symbol;Acc:HGNC:2972]	no	no	no	no
ENSG00000110680	24	48	11	CALCA	14966622	14972354	calcitonin related polypeptide alpha [Source:HGNC Symbol;Acc:HGNC:1437]	no	no	no	no
ENSG00000115461	24	48	2	IGFBP5	216672105	216695549	insulin like growth factor binding protein 5 [Source:HGNC Symbol;Acc:HGNC:5474]	no	no	no	no
ENSG00000118557	24	48	16	PMFBP1	72112157	72176878	polyamine modulated factor 1 binding protein 1 [Source:HGNC Symbol;Acc:HGNC:17728]	no	no	no	no
ENSG00000131480	24	48	17	AOC2	42844580	42850707	amine oxidase copper containing 2 [Source:HGNC Symbol;Acc:HGNC:549]	no	no	no	no
ENSG00000134250	24	48	1	NOTCH2	119911553	120100779	notch receptor 2 [Source:HGNC Symbol;Acc:HGNC:7882]	no	no	no	no
ENSG00000138587	24	48	15	MNS1	56421544	56465137	meiosis specific nuclear structural 1 [Source:HGNC Symbol;Acc:HGNC:29636]	no	no	no	no
ENSG00000143190	24	48	1	POU2F1	167220876	167427345	POU class 2 homeobox 1 [Source:HGNC Symbol;Acc:HGNC:9212]	no	no	no	no
ENSG00000144426	24	48	2	NBEAL1	203014608	203226378	neurobeachin like 1 [Source:HGNC Symbol;Acc:HGNC:20681]	no	no	no	no
ENSG00000154734	24	48	21	ADAMTS1	26835755	26845409	ADAM metallopeptidase with thrombospondin type 1 motif 1 [Source:HGNC Symbol;Acc:HGNC:217]	no	no	no	no
ENSG00000169442	24	48	1	CD52	26317958	26320523	CD52 molecule [Source:HGNC Symbol;Acc:HGNC:1804]	no	no	no	no
ENSG00000184441	24	48	21	ENSG00000184441	44331234	44335851	novel transcript, antisense to C21orf2	no	no	no	no
ENSG00000185596	24	48	15	WASH3P	101966075	101976266	WASP family homolog 3, pseudogene [Source:HGNC Symbol;Acc:HGNC:24362]	no	no	no	no
ENSG00000198406	24	48	3	BZW1P2	116645902	116646727	basic leucine zipper and W2 domains 1 pseudogene 2 [Source:HGNC Symbol;Acc:HGNC:33954]	no	no	no	no
ENSG00000203872	24	48	6	C6orf163	87344813	87365463	chromosome 6 open reading frame 163 [Source:HGNC Symbol;Acc:HGNC:21403]	no	no	no	no
ENSG00000204149	24	48	10	AGAP6	49982190	50011654	ArfGAP with GTPase domain, ankyrin repeat and PH domain 6 [Source:HGNC Symbol;Acc:HGNC:23466]	no	no	no	no
ENSG00000223705	24	48	7	NSUN5P1	75410368	75416597	NSUN5 pseudogene 1 [Source:HGNC Symbol;Acc:HGNC:19146]	no	no	no	no
ENSG00000233337	24	48	1	UBE2FP3	111437514	111438037	UBE2F pseudogene 3 [Source:HGNC Symbol;Acc:HGNC:44537]	no	no	no	no
ENSG00000240291	24	48	10	ENSG00000240291	18513115	18545651	novel transcript, antisense to CACNB2	no	no	no	no
ENSG00000253348	24	48	5	ENSG00000253348	170747047	170788650	novel transcript	no	no	no	no
ENSG00000254535	24	48	4	PABPC4L	134196333	134201789	poly(A) binding protein cytoplasmic 4 like [Source:HGNC Symbol;Acc:HGNC:31955]	no	no	no	no
ENSG00000254860	24	48	11	TMEM9B-AS1	8964502	8977527	TMEM9B antisense RNA 1 [Source:HGNC Symbol;Acc:HGNC:19230]	no	no	no	no
ENSG00000260469	24	48	15	INSYN1-AS1	73752317	73770613	INSYN1 antisense RNA 1 [Source:HGNC Symbol;Acc:HGNC:51422]	no	no	no	no
ENSG00000262943	24	48	17	ALOX12P2	6893782	6900032	arachidonate 12-lipoxygenase pseudogene 2 [Source:HGNC Symbol;Acc:HGNC:432]	no	no	no	no
ENSG00000269958	24	48	14	ENSG00000269958	103696353	103697163	novel transcript, sense intronic to KLC1	no	no	no	no
ENSG00000288596	24	48	8	C8orf44	66667615	66685564	chromosome 8 putative open reading frame 44 [Source:HGNC Symbol;Acc:HGNC:25646]	no	no	no	no
ENSG00000101096	24	48	20	NFATC2	51386957	51562831	nuclear factor of activated T cells 2 [Source:HGNC Symbol;Acc:HGNC:7776]	no	no	no	no
ENSG00000101842	24	48	X	VSIG1	108044970	108079184	V-set and immunoglobulin domain containing 1 [Source:HGNC Symbol;Acc:HGNC:28675]	no	no	no	no
ENSG00000132470	24	48	17	ITGB4	75721328	75757818	integrin subunit beta 4 [Source:HGNC Symbol;Acc:HGNC:6158]	no	no	no	no
ENSG00000136052	24	48	12	SLC41A2	104801801	104958744	solute carrier family 41 member 2 [Source:HGNC Symbol;Acc:HGNC:31045]	no	no	no	no
ENSG00000143318	24	48	1	CASQ1	160190575	160201886	calsequestrin 1 [Source:HGNC Symbol;Acc:HGNC:1512]	no	no	no	no
ENSG00000150779	24	48	11	TIMM8B	112084800	112086798	translocase of inner mitochondrial membrane 8 homolog B [Source:HGNC Symbol;Acc:HGNC:11818]	no	no	no	no
ENSG00000183783	24	48	4	KCTD8	44173903	44448809	potassium channel tetramerization domain containing 8 [Source:HGNC Symbol;Acc:HGNC:22394]	no	no	no	no
ENSG00000185900	24	48	8	POMK	43093498	43131180	protein O-mannose kinase [Source:HGNC Symbol;Acc:HGNC:26267]	no	no	no	no
ENSG00000187134	24	48	10	AKR1C1	4963253	4983283	aldo-keto reductase family 1 member C1 [Source:HGNC Symbol;Acc:HGNC:384]	no	no	no	no
ENSG00000203799	24	48	6	CCDC162P	109165831	109355063	coiled-coil domain containing 162, pseudogene [Source:HGNC Symbol;Acc:HGNC:21565]	no	no	no	no
ENSG00000213973	24	48	19	ZNF99	22752183	22784151	zinc finger protein 99 [Source:HGNC Symbol;Acc:HGNC:13175]	no	no	no	no
ENSG00000240563	24	48	1	L1TD1	62194849	62212328	LINE1 type transposase domain containing 1 [Source:HGNC Symbol;Acc:HGNC:25595]	no	no	no	no
ENSG00000245614	24	48	12	DDX11-AS1	31019434	31073847	DDX11 antisense RNA 1 [Source:HGNC Symbol;Acc:HGNC:44176]	no	no	no	no
ENSG00000243836	24	48	7	WDR86-AS1	151409161	151413354	WDR86 antisense RNA 1 [Source:HGNC Symbol;Acc:HGNC:41186]	no	no	no	no
ENSG00000161513	24	48	17	FDXR	74862497	74873031	ferredoxin reductase [Source:HGNC Symbol;Acc:HGNC:3642]	no	no	no	no
ENSG00000106588	24	48	7	PSMA2	42916828	42932185	proteasome 20S subunit alpha 2 [Source:HGNC Symbol;Acc:HGNC:9531]	no	no	no	no
ENSG00000108559	24	48	17	NUP88	5359668	5420164	nucleoporin 88 [Source:HGNC Symbol;Acc:HGNC:8067]	no	no	no	no
ENSG00000110696	24	48	11	C11orf58	16613132	16758340	chromosome 11 open reading frame 58 [Source:HGNC Symbol;Acc:HGNC:16990]	no	no	no	no
ENSG00000167992	24	48	11	VWCE	61258286	61295316	von Willebrand factor C and EGF domains [Source:HGNC Symbol;Acc:HGNC:26487]	no	no	no	no
ENSG00000213639	24	48	2	PPP1CB	28751640	28802940	protein phosphatase 1 catalytic subunit beta [Source:HGNC Symbol;Acc:HGNC:9282]	no	no	no	no
ENSG00000196741	24	48	X	LINC01560	47483571	47484823	long intergenic non-protein coding RNA 1560 [Source:HGNC Symbol;Acc:HGNC:27333]	no	no	no	yes
ENSG00000016402	23	46	6	IL20RA	136999971	137045180	interleukin 20 receptor subunit alpha [Source:HGNC Symbol;Acc:HGNC:6003]	no	no	no	no
ENSG00000066279	23	46	1	ASPM	197084121	197146694	assembly factor for spindle microtubules [Source:HGNC Symbol;Acc:HGNC:19048]	no	no	no	no
ENSG00000076685	23	46	10	NT5C2	103087185	103277605	5'-nucleotidase, cytosolic II [Source:HGNC Symbol;Acc:HGNC:8022]	no	no	no	no
ENSG00000077157	23	46	1	PPP1R12B	202348699	202592706	protein phosphatase 1 regulatory subunit 12B [Source:HGNC Symbol;Acc:HGNC:7619]	no	no	no	no
ENSG00000103657	23	46	15	HERC1	63608618	63833948	HECT and RLD domain containing E3 ubiquitin protein ligase family member 1 [Source:HGNC Symbol;Acc:HGNC:4867]	no	no	no	no
ENSG00000111846	23	46	6	GCNT2	10492223	10629368	glucosaminyl (N-acetyl) transferase 2 (I blood group) [Source:HGNC Symbol;Acc:HGNC:4204]	no	no	no	no
ENSG00000124067	23	46	16	SLC12A4	67943474	67969601	solute carrier family 12 member 4 [Source:HGNC Symbol;Acc:HGNC:10913]	no	no	no	no
ENSG00000126070	23	46	1	AGO3	35930718	36072500	argonaute RISC catalytic component 3 [Source:HGNC Symbol;Acc:HGNC:18421]	no	no	no	no
ENSG00000130821	23	46	X	SLC6A8	153687926	153696588	solute carrier family 6 member 8 [Source:HGNC Symbol;Acc:HGNC:11055]	no	no	no	no
ENSG00000152104	23	46	1	PTPN14	214348700	214552449	protein tyrosine phosphatase non-receptor type 14 [Source:HGNC Symbol;Acc:HGNC:9647]	no	no	no	no
ENSG00000166454	23	46	16	ATMIN	81035842	81047350	ATM interactor [Source:HGNC Symbol;Acc:HGNC:29034]	no	no	no	no
ENSG00000169083	23	46	X	AR	67544021	67730619	androgen receptor [Source:HGNC Symbol;Acc:HGNC:644]	no	no	no	yes
ENSG00000177519	23	46	2	RPRM	153477338	153478762	reprimo, TP53 dependent G2 arrest mediator homolog [Source:HGNC Symbol;Acc:HGNC:24201]	no	no	no	no
ENSG00000184863	23	46	7	RBM33	155644451	155781485	RNA binding motif protein 33 [Source:HGNC Symbol;Acc:HGNC:27223]	no	no	no	no
ENSG00000204764	23	46	5	RANBP17	170861870	171300015	RAN binding protein 17 [Source:HGNC Symbol;Acc:HGNC:14428]	no	no	no	no
ENSG00000222041	23	46	2	CYTOR	87454781	87636740	cytoskeleton regulator RNA [Source:HGNC Symbol;Acc:HGNC:28717]	no	no	no	no
ENSG00000249378	23	46	4	LINC01060	188400736	188681051	long intergenic non-protein coding RNA 1060 [Source:HGNC Symbol;Acc:HGNC:49081]	no	no	no	no
ENSG00000279495	23	46	14	ENSG00000279495	105370418	105372918	novel transcript	no	no	no	no
ENSG00000287625	23	46	2	ENSG00000287625	84926019	84966685	novel transcript	no	no	no	no
ENSG00000058453	23	46	1	CROCC	16740273	16972964	ciliary rootlet coiled-coil, rootletin [Source:HGNC Symbol;Acc:HGNC:21299]	no	no	no	no
ENSG00000101199	23	46	20	ARFGAP1	63272785	63289790	ADP ribosylation factor GTPase activating protein 1 [Source:HGNC Symbol;Acc:HGNC:15852]	no	no	no	no
ENSG00000114268	23	46	3	PFKFB4	48517684	48562015	6-phosphofructo-2-kinase/fructose-2,6-biphosphatase 4 [Source:HGNC Symbol;Acc:HGNC:8875]	no	no	no	no
ENSG00000116793	23	46	1	PHTF1	113696831	113759489	putative homeodomain transcription factor 1 [Source:HGNC Symbol;Acc:HGNC:8939]	no	no	no	no
ENSG00000118363	23	46	11	SPCS2	74949261	74979033	signal peptidase complex subunit 2 [Source:HGNC Symbol;Acc:HGNC:28962]	no	no	no	no
ENSG00000166762	23	46	15	CATSPER2	43628503	43668118	cation channel sperm associated 2 [Source:HGNC Symbol;Acc:HGNC:18810]	no	no	no	no
ENSG00000172164	23	46	8	SNTB1	120535745	120813273	syntrophin beta 1 [Source:HGNC Symbol;Acc:HGNC:11168]	no	no	no	no
ENSG00000182575	23	46	17	NXPH3	49575871	49583827	neurexophilin 3 [Source:HGNC Symbol;Acc:HGNC:8077]	no	no	no	no
ENSG00000259485	23	46	15	LINC02253	97215812	97432094	long intergenic non-protein coding RNA 2253 [Source:HGNC Symbol;Acc:HGNC:53151]	no	no	no	no
ENSG00000106633	23	46	7	GCK	44143213	44198170	glucokinase [Source:HGNC Symbol;Acc:HGNC:4195]	no	no	no	no
ENSG00000159753	23	46	16	CARMIL2	67644988	67657569	capping protein regulator and myosin 1 linker 2 [Source:HGNC Symbol;Acc:HGNC:27089]	no	no	no	no
ENSG00000198146	23	46	15	ZNF770	34978341	34988287	zinc finger protein 770 [Source:HGNC Symbol;Acc:HGNC:26061]	no	no	no	no
ENSG00000242715	23	46	13	CCDC169	36222008	36297840	coiled-coil domain containing 169 [Source:HGNC Symbol;Acc:HGNC:34361]	no	no	no	no
ENSG00000286381	23	46	22	NHIP	49047484	49052549	neuronal hypoxia inducible, placenta associated [Source:HGNC Symbol;Acc:HGNC:55561]	no	no	no	no
ENSG00000164951	23	46	8	PDP1	93857807	93926068	pyruvate dehydrogenase phosphatase catalytic subunit 1 [Source:HGNC Symbol;Acc:HGNC:9279]	no	no	no	no
ENSG00000075223	22	44	7	SEMA3C	80742538	80922359	semaphorin 3C [Source:HGNC Symbol;Acc:HGNC:10725]	no	no	no	no
ENSG00000125966	22	44	20	MMP24	35226690	35276998	matrix metallopeptidase 24 [Source:HGNC Symbol;Acc:HGNC:7172]	no	no	no	no
ENSG00000128596	22	44	7	CCDC136	128790757	128822132	coiled-coil domain containing 136 [Source:HGNC Symbol;Acc:HGNC:22225]	no	no	no	no
ENSG00000146278	22	44	6	PNRC1	89080751	89085160	proline rich nuclear receptor coactivator 1 [Source:HGNC Symbol;Acc:HGNC:17278]	no	no	no	no
ENSG00000172247	22	44	11	C1QTNF4	47589667	47594411	C1q and TNF related 4 [Source:HGNC Symbol;Acc:HGNC:14346]	no	no	no	no
ENSG00000179832	22	44	8	MROH1	144148016	144261927	maestro heat like repeat family member 1 [Source:HGNC Symbol;Acc:HGNC:26958]	no	no	no	no
ENSG00000185697	22	44	8	MYBL1	66562175	66614247	MYB proto-oncogene like 1 [Source:HGNC Symbol;Acc:HGNC:7547]	no	no	no	no
ENSG00000196581	22	44	1	AJAP1	4654609	4792534	adherens junctions associated protein 1 [Source:HGNC Symbol;Acc:HGNC:30801]	no	no	no	no
ENSG00000223969	22	44	7	ENSG00000223969	90590619	90597398	novel transcript	no	no	no	no
ENSG00000240891	22	44	3	PLCXD2	111674676	111846447	phosphatidylinositol specific phospholipase C X domain containing 2 [Source:HGNC Symbol;Acc:HGNC:26462]	no	no	no	no
ENSG00000254876	22	44	9	SUGT1P4-STRA6LP	97238449	97297314	SUGT1P4-STRA6LP readthrough [Source:HGNC Symbol;Acc:HGNC:53834]	no	no	no	no
ENSG00000255026	22	44	11	ENSG00000255026	287305	288987	novel transcript	no	no	no	no
ENSG00000104142	22	44	15	VPS18	40894450	40903975	VPS18 core subunit of CORVET and HOPS complexes [Source:HGNC Symbol;Acc:HGNC:15972]	no	no	no	no
ENSG00000119943	22	44	10	PYROXD2	98383565	98415182	pyridine nucleotide-disulphide oxidoreductase domain 2 [Source:HGNC Symbol;Acc:HGNC:23517]	no	no	no	no
ENSG00000130363	22	44	6	RSPH3	158972871	159000202	radial spoke head 3 [Source:HGNC Symbol;Acc:HGNC:21054]	no	no	no	no
ENSG00000160298	22	44	21	C21orf58	46300181	46323875	chromosome 21 open reading frame 58 [Source:HGNC Symbol;Acc:HGNC:1300]	no	no	no	no
ENSG00000160439	22	44	19	RDH13	55039108	55071291	retinol dehydrogenase 13 [Source:HGNC Symbol;Acc:HGNC:19978]	no	no	no	no
ENSG00000161544	22	44	17	CYGB	76527356	76551175	cytoglobin [Source:HGNC Symbol;Acc:HGNC:16505]	no	no	no	no
ENSG00000165238	22	44	9	WNK2	93184122	93320572	WNK lysine deficient protein kinase 2 [Source:HGNC Symbol;Acc:HGNC:14542]	no	no	no	no
ENSG00000168807	22	44	16	SNTB2	69187147	69309052	syntrophin beta 2 [Source:HGNC Symbol;Acc:HGNC:11169]	no	no	no	no
ENSG00000170439	22	44	12	METTL7B	55681736	55684611	methyltransferase like 7B [Source:HGNC Symbol;Acc:HGNC:28276]	no	no	no	no
ENSG00000180694	22	44	8	TMEM64	90621995	90791632	transmembrane protein 64 [Source:HGNC Symbol;Acc:HGNC:25441]	no	no	no	no
ENSG00000184916	22	44	14	JAG2	105140982	105168824	jagged canonical Notch ligand 2 [Source:HGNC Symbol;Acc:HGNC:6189]	no	no	no	no
ENSG00000189229	22	44	3	ENSG00000189229	6490460	6736750	novel transcript	no	no	no	no
ENSG00000197798	22	44	11	FAM118B	126211724	126262984	family with sequence similarity 118 member B [Source:HGNC Symbol;Acc:HGNC:26110]	no	no	no	no
ENSG00000234062	22	44	X	TM9SF5P	136958883	137021479	transmembrane 9 superfamily member 5, pseudogene [Source:HGNC Symbol;Acc:HGNC:55623]	no	no	no	no
ENSG00000243449	22	44	4	C4orf48	2041995	2043964	chromosome 4 open reading frame 48 [Source:HGNC Symbol;Acc:HGNC:34437]	no	no	no	no
ENSG00000261780	22	44	18	LINC02582	73324941	73349879	long intergenic non-protein coding RNA 2582 [Source:HGNC Symbol;Acc:HGNC:53792]	no	no	no	no
ENSG00000271122	22	44	7	HERPUD2-AS1	35695214	35699413	HERPUD2 antisense RNA 1 [Source:HGNC Symbol;Acc:HGNC:55258]	no	no	no	no
ENSG00000280707	22	44	6	ENSG00000280707	167228200	167237517	human pluripotency-associated transcript 5 [Source:NCBI gene (formerly Entrezgene);Acc:112590798]	no	no	no	no
ENSG00000143590	22	44	1	EFNA3	155078837	155087538	ephrin A3 [Source:HGNC Symbol;Acc:HGNC:3223]	no	no	no	no
ENSG00000198205	22	44	X	ZXDA	57905430	57910458	zinc finger X-linked duplicated A [Source:HGNC Symbol;Acc:HGNC:13198]	no	no	no	no
ENSG00000104953	22	44	19	TLE6	2977538	2995179	TLE family member 6, subcortical maternal complex member [Source:HGNC Symbol;Acc:HGNC:30788]	no	no	no	no
ENSG00000039523	22	44	16	RIPOR1	67518418	67546788	RHO family interacting cell polarization regulator 1 [Source:HGNC Symbol;Acc:HGNC:25836]	no	no	no	no
ENSG00000069399	22	44	19	BCL3	44747705	44760044	BCL3 transcription coactivator [Source:HGNC Symbol;Acc:HGNC:998]	no	no	no	no
ENSG00000102935	22	44	16	ZNF423	49487524	49857919	zinc finger protein 423 [Source:HGNC Symbol;Acc:HGNC:16762]	no	no	no	no
ENSG00000105926	22	44	7	PALS2	24573268	24694193	protein associated with LIN7 2, MAGUK p55 family member [Source:HGNC Symbol;Acc:HGNC:18167]	no	no	no	no
ENSG00000108590	22	44	17	MED31	6643311	6651634	mediator complex subunit 31 [Source:HGNC Symbol;Acc:HGNC:24260]	no	no	no	no
ENSG00000120694	22	44	13	HSPH1	31134973	31162388	heat shock protein family H (Hsp110) member 1 [Source:HGNC Symbol;Acc:HGNC:16969]	no	no	no	no
ENSG00000125731	22	44	19	SH2D3A	6752160	6767463	SH2 domain containing 3A [Source:HGNC Symbol;Acc:HGNC:16885]	no	no	no	no
ENSG00000135046	22	44	9	ANXA1	73151865	73170393	annexin A1 [Source:HGNC Symbol;Acc:HGNC:533]	no	no	no	no
ENSG00000135829	22	44	1	DHX9	182839347	182887982	DExH-box helicase 9 [Source:HGNC Symbol;Acc:HGNC:2750]	no	no	no	no
ENSG00000142875	22	44	1	PRKACB	84078062	84238498	protein kinase cAMP-activated catalytic subunit beta [Source:HGNC Symbol;Acc:HGNC:9381]	no	no	no	no
ENSG00000165338	22	44	10	HECTD2	91409280	91514829	HECT domain E3 ubiquitin protein ligase 2 [Source:HGNC Symbol;Acc:HGNC:26736]	no	no	no	no
ENSG00000166352	22	44	11	IFTAP	36594369	36675695	intraflagellar transport associated protein [Source:HGNC Symbol;Acc:HGNC:25142]	no	no	no	no
ENSG00000168060	22	44	11	NAALADL1	65044818	65058553	N-acetylated alpha-linked acidic dipeptidase like 1 [Source:HGNC Symbol;Acc:HGNC:23536]	no	no	no	no
ENSG00000172661	22	44	10	WASHC2C	45727200	45792964	WASH complex subunit 2C [Source:HGNC Symbol;Acc:HGNC:23414]	no	no	no	no
ENSG00000185515	22	44	X	BRCC3	155071420	155123077	BRCA1/BRCA2-containing complex subunit 3 [Source:HGNC Symbol;Acc:HGNC:24185]	no	no	no	yes
ENSG00000273151	22	44	7	ENSG00000273151	879790	886547	novel transcript, antisense to GET4	no	no	no	no
ENSG00000204619	22	44	6	PPP1R11	30066709	30070333	protein phosphatase 1 regulatory inhibitor subunit 11 [Source:HGNC Symbol;Acc:HGNC:9285]	no	no	no	no
ENSG00000182379	22	44	12	NXPH4	57216794	57226449	neurexophilin 4 [Source:HGNC Symbol;Acc:HGNC:8078]	no	no	no	no
ENSG00000268858	22	44	20	ENSG00000268858	63861212	63864293	novel transcript, antisense to ABHD16B	no	no	no	no
ENSG00000105329	21	42	19	TGFB1	41301587	41353922	transforming growth factor beta 1 [Source:HGNC Symbol;Acc:HGNC:11766]	no	no	no	no
ENSG00000110455	21	42	11	ACCS	44065925	44084237	1-aminocyclopropane-1-carboxylate synthase homolog (inactive) [Source:HGNC Symbol;Acc:HGNC:23989]	no	no	no	no
ENSG00000134245	21	42	1	WNT2B	112466541	112530165	Wnt family member 2B [Source:HGNC Symbol;Acc:HGNC:12781]	no	no	no	no
ENSG00000151773	21	42	13	CCDC122	43823909	43879740	coiled-coil domain containing 122 [Source:HGNC Symbol;Acc:HGNC:26478]	no	no	no	no
ENSG00000156925	21	42	X	ZIC3	137566127	137577691	Zic family member 3 [Source:HGNC Symbol;Acc:HGNC:12874]	no	no	no	no
ENSG00000159403	21	42	12	C1R	7080214	7092540	complement C1r [Source:HGNC Symbol;Acc:HGNC:1246]	no	no	no	no
ENSG00000163319	21	42	4	MRPS18C	83455932	83469735	mitochondrial ribosomal protein S18C [Source:HGNC Symbol;Acc:HGNC:16633]	no	no	no	no
ENSG00000164663	21	42	6	USP49	41789896	41895375	ubiquitin specific peptidase 49 [Source:HGNC Symbol;Acc:HGNC:20078]	no	no	no	no
ENSG00000173846	21	42	1	PLK3	44800377	44805990	polo like kinase 3 [Source:HGNC Symbol;Acc:HGNC:2154]	no	no	no	no
ENSG00000183439	21	42	4	TRIM61	164954446	164977668	tripartite motif containing 61 [Source:HGNC Symbol;Acc:HGNC:24339]	no	no	no	no
ENSG00000184012	21	42	21	TMPRSS2	41464300	41531116	transmembrane serine protease 2 [Source:HGNC Symbol;Acc:HGNC:11876]	no	no	no	no
ENSG00000225178	21	42
ENSG00000228327	21	42	1	ENSG00000228327	764723	774280	general transcription factor IIi (GTF2I) pseudogene	no	no	no	no
ENSG00000275764	21	42	12	ENSG00000275764	27037100	27038960	novel transcript	no	no	no	no
ENSG00000278041	21	42	20	ENSG00000278041	21499261	21502934	novel transcript	no	no	no	no
ENSG00000279233	21	42	12	ENSG00000279233	125138245	125141711	novel transcript	no	no	no	no
ENSG00000284610	21	42	8	ENSG00000284610	12014831	12015049	RNA binding protein, fox-1 homolog (C. elegans) 1 (RBFOX1) pseudogene	no	no	no	no
ENSG00000013275	21	42	19	PSMC4	39971165	39981764	proteasome 26S subunit, ATPase 4 [Source:HGNC Symbol;Acc:HGNC:9551]	no	no	no	no
ENSG00000020181	21	42	8	ADGRA2	37784191	37844896	adhesion G protein-coupled receptor A2 [Source:HGNC Symbol;Acc:HGNC:17849]	no	no	no	no
ENSG00000059588	21	42	1	TARBP1	234391313	234479179	TAR (HIV-1) RNA binding protein 1 [Source:HGNC Symbol;Acc:HGNC:11568]	no	no	no	no
ENSG00000067177	21	42	X	PHKA1	72578814	72714319	phosphorylase kinase regulatory subunit alpha 1 [Source:HGNC Symbol;Acc:HGNC:8925]	no	no	no	yes
ENSG00000120659	21	42	13	TNFSF11	42562736	42608013	TNF superfamily member 11 [Source:HGNC Symbol;Acc:HGNC:11926]	no	no	no	no
ENSG00000155629	21	42	10	PIK3AP1	96593315	96720514	phosphoinositide-3-kinase adaptor protein 1 [Source:HGNC Symbol;Acc:HGNC:30034]	no	no	no	no
ENSG00000162377	21	42	1	COA7	52684449	52698347	cytochrome c oxidase assembly factor 7 [Source:HGNC Symbol;Acc:HGNC:25716]	no	no	no	no
ENSG00000197172	21	42	X	MAGEA6	152766136	152769716	MAGE family member A6 [Source:HGNC Symbol;Acc:HGNC:6804]	no	no	no	no
ENSG00000270871	21	42	17	ENSG00000270871	35816717	35830293	novel transcript, antisense TAF15	no	no	no	no
ENSG00000154736	21	42	21	ADAMTS5	26917922	26967088	ADAM metallopeptidase with thrombospondin type 1 motif 5 [Source:HGNC Symbol;Acc:HGNC:221]	no	no	no	no
ENSG00000132623	21	42	20	ANKEF1	9986126	10058303	ankyrin repeat and EF-hand domain containing 1 [Source:HGNC Symbol;Acc:HGNC:15803]	no	no	no	no
ENSG00000280173	21	42	3	ENSG00000280173	47346950	47349073	TEC	no	no	no	no
[truncated: 1,964 more rows]

## Sheet: NSCs
Supplemental Data S5: Bootstrap analysis in NSCs. We looped over the patients and randomly sampled a clone for each patient.
Ensembl_id	DEG_count	DEG_percent	chromosome_name	hgnc_symbol	start_position	end_position	description	isPAR	escape_Tukianien	variable_Tukianien	inactive_Tukianien
ENSG00000000005	50	100	X	TNMD	100584936	100599885	tenomodulin [Source:HGNC Symbol;Acc:HGNC:17757]	no	no	no	no
ENSG00000001461	50	100	1	NIPAL3	24415802	24472976	NIPA like domain containing 3 [Source:HGNC Symbol;Acc:HGNC:25233]	no	no	no	no
ENSG00000003096	50	100	X	KLHL13	117897813	118117340	kelch like family member 13 [Source:HGNC Symbol;Acc:HGNC:22931]	no	no	no	yes
ENSG00000003137	50	100	2	CYP26B1	72129238	72147862	cytochrome P450 family 26 subfamily B member 1 [Source:HGNC Symbol;Acc:HGNC:20581]	no	no	no	no
ENSG00000003989	50	100	8	SLC7A2	17497088	17570573	solute carrier family 7 member 2 [Source:HGNC Symbol;Acc:HGNC:11060]	no	no	no	no
ENSG00000004399	50	100	3	PLXND1	129555214	129606676	plexin D1 [Source:HGNC Symbol;Acc:HGNC:9107]	no	no	no	no
ENSG00000004478	50	100	12	FKBP4	2794970	2805423	FKBP prolyl isomerase 4 [Source:HGNC Symbol;Acc:HGNC:3720]	no	no	no	no
ENSG00000004846	50	100	7	ABCB5	20615667	20777038	ATP binding cassette subfamily B member 5 [Source:HGNC Symbol;Acc:HGNC:46]	no	no	no	no
ENSG00000005102	50	100	17	MEOX1	43640389	43661922	mesenchyme homeobox 1 [Source:HGNC Symbol;Acc:HGNC:7013]	no	no	no	no
ENSG00000005108	50	100	7	THSD7A	11370365	11832198	thrombospondin type 1 domain containing 7A [Source:HGNC Symbol;Acc:HGNC:22207]	no	no	no	no
ENSG00000005238	50	100	9	ATOSB	35104112	35116341	atos homolog B [Source:HGNC Symbol;Acc:HGNC:25666]	no	no	no	no
ENSG00000005379	50	100	17	TSPOAP1	58301228	58328795	TSPO associated protein 1 [Source:HGNC Symbol;Acc:HGNC:16831]	no	no	no	no
ENSG00000005471	50	100	7	ABCB4	87401696	87480435	ATP binding cassette subfamily B member 4 [Source:HGNC Symbol;Acc:HGNC:45]	no	no	no	no
ENSG00000005882	50	100	17	PDK2	50094737	50112152	pyruvate dehydrogenase kinase 2 [Source:HGNC Symbol;Acc:HGNC:8810]	no	no	no	no
ENSG00000005884	50	100	17	ITGA3	50055968	50090481	integrin subunit alpha 3 [Source:HGNC Symbol;Acc:HGNC:6139]	no	no	no	no
ENSG00000006071	50	100	11	ABCC8	17392498	17476894	ATP binding cassette subfamily C member 8 [Source:HGNC Symbol;Acc:HGNC:59]	no	no	no	no
ENSG00000006625	50	100	7	GGCT	30496621	30504841	gamma-glutamylcyclotransferase [Source:HGNC Symbol;Acc:HGNC:21705]	no	no	no	no
ENSG00000006634	50	100	7	DBF4	87876216	87909553	DBF4 zinc finger [Source:HGNC Symbol;Acc:HGNC:17364]	no	no	no	no
ENSG00000006740	50	100	17	ARHGAP44	12789498	12991643	Rho GTPase activating protein 44 [Source:HGNC Symbol;Acc:HGNC:29096]	no	no	no	no
ENSG00000006756	50	100	X	ARSD	2903972	2929349	arylsulfatase D [Source:HGNC Symbol;Acc:HGNC:717]	no	yes	no	no
ENSG00000007080	50	100	19	CCDC124	17933015	17943991	coiled-coil domain containing 124 [Source:HGNC Symbol;Acc:HGNC:25171]	no	no	no	no
ENSG00000007314	50	100	17	SCN4A	63938554	63972918	sodium voltage-gated channel alpha subunit 4 [Source:HGNC Symbol;Acc:HGNC:10591]	no	no	no	no
ENSG00000007350	50	100	X	TKTL1	154295795	154330350	transketolase like 1 [Source:HGNC Symbol;Acc:HGNC:11835]	no	no	no	yes
ENSG00000007372	50	100	11	PAX6	31784779	31817961	paired box 6 [Source:HGNC Symbol;Acc:HGNC:8620]	no	no	no	no
ENSG00000007944	50	100	6	MYLIP	16129086	16148248	myosin regulatory light chain interacting protein [Source:HGNC Symbol;Acc:HGNC:21155]	no	no	no	no
ENSG00000007968	50	100	1	E2F2	23506438	23531233	E2F transcription factor 2 [Source:HGNC Symbol;Acc:HGNC:3114]	no	no	no	no
ENSG00000008056	50	100	X	SYN1	47571901	47619857	synapsin I [Source:HGNC Symbol;Acc:HGNC:11494]	no	no	no	yes
ENSG00000008226	50	100	3	DLEC1	38039205	38124025	DLEC1 cilia and flagella associated protein [Source:HGNC Symbol;Acc:HGNC:2899]	no	no	no	no
ENSG00000008300	50	100	3	CELSR3	48636463	48662886	cadherin EGF LAG seven-pass G-type receptor 3 [Source:HGNC Symbol;Acc:HGNC:3230]	no	no	no	no
ENSG00000008394	50	100	12	MGST1	16347142	16609259	microsomal glutathione S-transferase 1 [Source:HGNC Symbol;Acc:HGNC:7061]	no	no	no	no
ENSG00000010292	50	100	12	NCAPD2	6493356	6531955	non-SMC condensin I complex subunit D2 [Source:HGNC Symbol;Acc:HGNC:24305]	no	no	no	no
ENSG00000010626	50	100	12	LRRC23	6873569	6914241	leucine rich repeat containing 23 [Source:HGNC Symbol;Acc:HGNC:19138]	no	no	no	no
ENSG00000010704	50	100	6	HFE	26087281	26098343	homeostatic iron regulator [Source:HGNC Symbol;Acc:HGNC:4886]	no	no	no	no
ENSG00000010932	50	100	1	FMO1	171248471	171285978	flavin containing dimethylaniline monoxygenase 1 [Source:HGNC Symbol;Acc:HGNC:3769]	no	no	no	no
ENSG00000011260	50	100	17	UTP18	51260546	51297936	UTP18 small subunit processome component [Source:HGNC Symbol;Acc:HGNC:24274]	no	no	no	no
ENSG00000011426	50	100	7	ANLN	36389821	36453791	anillin, actin binding protein [Source:HGNC Symbol;Acc:HGNC:14082]	no	no	no	no
ENSG00000012171	50	100	3	SEMA3B	50267558	50277546	semaphorin 3B [Source:HGNC Symbol;Acc:HGNC:10724]	no	no	no	no
ENSG00000012817	50	100	Y	KDM5D	19703865	19744939	lysine demethylase 5D [Source:HGNC Symbol;Acc:HGNC:11115]	no	no	no	no
ENSG00000012822	50	100	12	CALCOCO1	53708517	53727745	calcium binding and coiled-coil domain 1 [Source:HGNC Symbol;Acc:HGNC:29306]	no	no	no	no
ENSG00000013288	50	100	4	MAN2B2	6575189	6623362	mannosidase alpha class 2B member 2 [Source:HGNC Symbol;Acc:HGNC:29623]	no	no	no	no
ENSG00000013297	50	100	3	CLDN11	170418868	170454733	claudin 11 [Source:HGNC Symbol;Acc:HGNC:8514]	no	no	no	no
ENSG00000013619	50	100	X	MAMLD1	150361422	150514178	mastermind like domain containing 1 [Source:HGNC Symbol;Acc:HGNC:2568]	no	no	no	yes
ENSG00000013810	50	100	4	TACC3	1712858	1745171	transforming acidic coiled-coil containing protein 3 [Source:HGNC Symbol;Acc:HGNC:11524]	no	no	no	no
ENSG00000014138	50	100	11	POLA2	65261913	65305959	DNA polymerase alpha 2, accessory subunit [Source:HGNC Symbol;Acc:HGNC:30073]	no	no	no	no
ENSG00000015592	50	100	8	STMN4	27235308	27258420	stathmin 4 [Source:HGNC Symbol;Acc:HGNC:16078]	no	no	no	no
ENSG00000017483	50	100	X	SLC38A5	48458537	48470260	solute carrier family 38 member 5 [Source:HGNC Symbol;Acc:HGNC:18070]	no	no	no	yes
ENSG00000019485	50	100	11	PRDM11	45095806	45235110	PR/SET domain 11 [Source:HGNC Symbol;Acc:HGNC:13996]	no	no	no	no
ENSG00000020181	50	100	8	ADGRA2	37784191	37844896	adhesion G protein-coupled receptor A2 [Source:HGNC Symbol;Acc:HGNC:17849]	no	no	no	no
ENSG00000021645	50	100	14	NRXN3	78170373	79868291	neurexin 3 [Source:HGNC Symbol;Acc:HGNC:8010]	no	no	no	no
ENSG00000022556	50	100	19	NLRP2	54953130	55001142	NLR family pyrin domain containing 2 [Source:HGNC Symbol;Acc:HGNC:22948]	no	no	no	no
ENSG00000024526	50	100	1	DEPDC1	68474152	68497221	DEP domain containing 1 [Source:HGNC Symbol;Acc:HGNC:22949]	no	no	no	no
ENSG00000029153	50	100	12	BMAL2	27332836	27425289	basic helix-loop-helix ARNT like 2 [Source:HGNC Symbol;Acc:HGNC:18984]	no	no	no	no
ENSG00000029534	50	100	8	ANK1	41653220	41896741	ankyrin 1 [Source:HGNC Symbol;Acc:HGNC:492]	no	no	no	no
ENSG00000031003	50	100	5	FAM13B	137937960	138051961	family with sequence similarity 13 member B [Source:HGNC Symbol;Acc:HGNC:1335]	no	no	no	no
ENSG00000031081	50	100	3	ARHGAP31	119294383	119420714	Rho GTPase activating protein 31 [Source:HGNC Symbol;Acc:HGNC:29216]	no	no	no	no
ENSG00000031691	50	100	6	CENPQ	49463370	49493107	centromere protein Q [Source:HGNC Symbol;Acc:HGNC:21347]	no	no	no	no
ENSG00000031698	50	100	1	SARS1	109213918	109238182	seryl-tRNA synthetase 1 [Source:HGNC Symbol;Acc:HGNC:10537]	no	no	no	no
ENSG00000033122	50	100	1	LRRC7	69567922	70151945	leucine rich repeat containing 7 [Source:HGNC Symbol;Acc:HGNC:18531]	no	no	no	no
ENSG00000035499	50	100	5	DEPDC1B	60596912	60700190	DEP domain containing 1B [Source:HGNC Symbol;Acc:HGNC:24902]	no	no	no	no
ENSG00000035862	50	100	17	TIMP2	78852977	78925387	TIMP metallopeptidase inhibitor 2 [Source:HGNC Symbol;Acc:HGNC:11821]	no	no	no	no
ENSG00000036530	50	100	14	CYP46A1	99684298	99727301	cytochrome P450 family 46 subfamily A member 1 [Source:HGNC Symbol;Acc:HGNC:2641]	no	no	no	no
ENSG00000037280	50	100	5	FLT4	180601506	180649624	fms related receptor tyrosine kinase 4 [Source:HGNC Symbol;Acc:HGNC:3767]	no	no	no	no
ENSG00000038295	50	100	4	TLL1	165873237	166104457	tolloid like 1 [Source:HGNC Symbol;Acc:HGNC:11843]	no	no	no	no
ENSG00000039537	50	100	5	C6	41142116	41261438	complement C6 [Source:HGNC Symbol;Acc:HGNC:1339]	no	no	no	no
ENSG00000040731	50	100	5	CDH10	24487100	24644978	cadherin 10 [Source:HGNC Symbol;Acc:HGNC:1749]	no	no	no	no
ENSG00000042286	50	100	10	AIFM2	70098223	70132934	apoptosis inducing factor mitochondria associated 2 [Source:HGNC Symbol;Acc:HGNC:21411]	no	no	no	no
ENSG00000042493	50	100	2	CAPG	85394753	85418432	capping actin protein, gelsolin like [Source:HGNC Symbol;Acc:HGNC:1474]	no	no	no	no
ENSG00000044524	50	100	3	EPHA3	89107621	89482134	EPH receptor A3 [Source:HGNC Symbol;Acc:HGNC:3387]	no	no	no	no
ENSG00000047346	50	100	15	ATOSA	52581317	52709817	atos homolog A [Source:HGNC Symbol;Acc:HGNC:25609]	no	no	no	no
ENSG00000047617	50	100	12	ANO2	5531869	5946232	anoctamin 2 [Source:HGNC Symbol;Acc:HGNC:1183]	no	no	no	no
ENSG00000047648	50	100	X	ARHGAP6	11117651	11665920	Rho GTPase activating protein 6 [Source:HGNC Symbol;Acc:HGNC:676]	no	no	no	yes
ENSG00000049089	50	100	1	COL9A2	40300489	40317813	collagen type IX alpha 2 chain [Source:HGNC Symbol;Acc:HGNC:2218]	no	no	no	no
ENSG00000049130	50	100	12	KITLG	88492793	88580851	KIT ligand [Source:HGNC Symbol;Acc:HGNC:6343]	no	no	no	no
ENSG00000049323	50	100	2	LTBP1	32946953	33399509	latent transforming growth factor beta binding protein 1 [Source:HGNC Symbol;Acc:HGNC:6714]	no	no	no	no
ENSG00000049540	50	100	7	ELN	74027789	74069907	elastin [Source:HGNC Symbol;Acc:HGNC:3327]	no	no	no	no
ENSG00000050327	50	100	7	ARHGEF5	144355288	144380632	Rho guanine nucleotide exchange factor 5 [Source:HGNC Symbol;Acc:HGNC:13209]	no	no	no	no
ENSG00000051009	50	100	11	FHIP1B	6211345	6234711	FHF complex subunit HOOK interacting protein 1B [Source:HGNC Symbol;Acc:HGNC:25378]	no	no	no	no
ENSG00000051180	50	100	15	RAD51	40694774	40732340	RAD51 recombinase [Source:HGNC Symbol;Acc:HGNC:9817]	no	no	no	no
ENSG00000051596	50	100	5	THOC3	175917873	176034680	THO complex subunit 3 [Source:HGNC Symbol;Acc:HGNC:19072]	no	no	no	no
ENSG00000052841	50	100	11	TTC17	43358920	43494933	tetratricopeptide repeat domain 17 [Source:HGNC Symbol;Acc:HGNC:25596]	no	no	no	no
ENSG00000054356	50	100	2	PTPRN	219289623	219309648	protein tyrosine phosphatase receptor type N [Source:HGNC Symbol;Acc:HGNC:9676]	no	no	no	no
ENSG00000054793	50	100	20	ATP9A	51596514	51768390	ATPase phospholipid transporting 9A (putative) [Source:HGNC Symbol;Acc:HGNC:13540]	no	no	no	no
ENSG00000054967	50	100	11	RELT	73376399	73397474	RELT TNF receptor [Source:HGNC Symbol;Acc:HGNC:13764]	no	no	no	no
ENSG00000056487	50	100	22	PHF21B	44881162	45010005	PHD finger protein 21B [Source:HGNC Symbol;Acc:HGNC:25161]	no	no	no	no
ENSG00000057468	50	100	1	MSH4	75796882	75913242	mutS homolog 4 [Source:HGNC Symbol;Acc:HGNC:7327]	no	no	no	no
ENSG00000057657	50	100	6	PRDM1	105993463	106109939	PR/SET domain 1 [Source:HGNC Symbol;Acc:HGNC:9346]	no	no	no	no
ENSG00000058668	50	100	1	ATP2B4	203626832	203744081	ATPase plasma membrane Ca2+ transporting 4 [Source:HGNC Symbol;Acc:HGNC:817]	no	no	no	no
ENSG00000059804	50	100	12	SLC2A3	7919230	7936187	solute carrier family 2 member 3 [Source:HGNC Symbol;Acc:HGNC:11007]	no	no	no	no
ENSG00000060982	50	100	12	BCAT1	24810024	24949101	branched chain amino acid transaminase 1 [Source:HGNC Symbol;Acc:HGNC:976]	no	no	no	no
ENSG00000061918	50	100	4	GUCY1B1	155758992	155807811	guanylate cyclase 1 soluble subunit beta 1 [Source:HGNC Symbol;Acc:HGNC:4687]	no	no	no	no
ENSG00000062282	50	100	11	DGAT2	75759512	75801535	diacylglycerol O-acyltransferase 2 [Source:HGNC Symbol;Acc:HGNC:16940]	no	no	no	no
ENSG00000062822	50	100	19	POLD1	50384204	50418018	DNA polymerase delta 1, catalytic subunit [Source:HGNC Symbol;Acc:HGNC:9175]	no	no	no	no
ENSG00000063127	50	100	19	SLC6A16	49289638	49325215	solute carrier family 6 member 16 [Source:HGNC Symbol;Acc:HGNC:13622]	no	no	no	no
ENSG00000063180	50	100	19	CA11	48637946	48646187	carbonic anhydrase 11 [Source:HGNC Symbol;Acc:HGNC:1370]	no	no	no	no
ENSG00000064115	50	100	12	TM7SF3	26971579	27014434	transmembrane 7 superfamily member 3 [Source:HGNC Symbol;Acc:HGNC:23049]	no	no	no	no
ENSG00000064300	50	100	17	NGFR	49495293	49515008	nerve growth factor receptor [Source:HGNC Symbol;Acc:HGNC:7809]	no	no	no	no
ENSG00000064601	50	100	20	CTSA	45890144	45898949	cathepsin A [Source:HGNC Symbol;Acc:HGNC:9251]	no	no	no	no
ENSG00000064692	50	100	5	SNCAIP	122311354	122464219	synuclein alpha interacting protein [Source:HGNC Symbol;Acc:HGNC:11139]	no	no	no	no
ENSG00000065057	50	100	16	NTHL1	2039815	2047866	nth like DNA glycosylase 1 [Source:HGNC Symbol;Acc:HGNC:8028]	no	no	no	no
ENSG00000065060	50	100	6	BLTP3A	34792083	34877514	bridge-like lipid transfer protein family member 3A [Source:HGNC Symbol;Acc:HGNC:21216]	no	no	no	no
ENSG00000065268	50	100	19	WDR18	984332	998438	WD repeat domain 18 [Source:HGNC Symbol;Acc:HGNC:17956]	no	no	no	no
ENSG00000065320	50	100	17	NTN1	9021510	9244000	netrin 1 [Source:HGNC Symbol;Acc:HGNC:8029]	no	no	no	no
ENSG00000065328	50	100	10	MCM10	13161558	13211110	minichromosome maintenance 10 replication initiation factor [Source:HGNC Symbol;Acc:HGNC:18043]	no	no	no	no
ENSG00000065609	50	100	6	SNAP91	83552880	83709691	synaptosome associated protein 91 [Source:HGNC Symbol;Acc:HGNC:14986]	no	no	no	no
ENSG00000065618	50	100	10	COL17A1	104031286	104085880	collagen type XVII alpha 1 chain [Source:HGNC Symbol;Acc:HGNC:2194]	no	no	no	no
ENSG00000065911	50	100	2	MTHFD2	74186172	74217565	methylenetetrahydrofolate dehydrogenase (NADP+ dependent) 2, methenyltetrahydrofolate cyclohydrolase [Source:HGNC Symbol;Acc:HGNC:7434]	no	no	no	no
ENSG00000065923	50	100	X	SLC9A7	46599251	46759118	solute carrier family 9 member A7 [Source:HGNC Symbol;Acc:HGNC:17123]	no	no	no	yes
ENSG00000066405	50	100	3	CLDN18	137998735	138033655	claudin 18 [Source:HGNC Symbol;Acc:HGNC:2039]	no	no	no	no
ENSG00000066468	50	100	10	FGFR2	121478332	121598458	fibroblast growth factor receptor 2 [Source:HGNC Symbol;Acc:HGNC:3689]	no	no	no	no
ENSG00000066583	50	100	5	ISOC1	129094749	129114028	isochorismatase domain containing 1 [Source:HGNC Symbol;Acc:HGNC:24254]	no	no	no	no
ENSG00000066735	50	100	14	KIF26A	104136454	104180894	kinesin family member 26A [Source:HGNC Symbol;Acc:HGNC:20226]	no	no	no	no
ENSG00000067048	50	100	Y	DDX3Y	12904108	12920478	DEAD-box helicase 3 Y-linked [Source:HGNC Symbol;Acc:HGNC:2699]	no	no	no	no
ENSG00000067225	50	100	15	PKM	72199029	72231819	pyruvate kinase M1/2 [Source:HGNC Symbol;Acc:HGNC:9021]	no	no	no	no
ENSG00000067601	50	100	7	PMS2P4	67295608	67299424	PMS1 homolog 2, mismatch repair system component pseudogene 4 [Source:HGNC Symbol;Acc:HGNC:9129]	no	no	no	no
ENSG00000067606	50	100	1	PRKCZ	2050411	2185395	protein kinase C zeta [Source:HGNC Symbol;Acc:HGNC:9412]	no	no	no	no
ENSG00000067646	50	100	Y	ZFY	2935281	2982506	zinc finger protein Y-linked [Source:HGNC Symbol;Acc:HGNC:12870]	no	no	no	no
ENSG00000067955	50	100	16	CBFB	67028984	67101058	core-binding factor subunit beta [Source:HGNC Symbol;Acc:HGNC:1539]	no	no	no	no
ENSG00000067992	50	100	X	PDK3	24465244	24550466	pyruvate dehydrogenase kinase 3 [Source:HGNC Symbol;Acc:HGNC:8811]	no	no	no	yes
ENSG00000068489	50	100	17	PRR11	59155732	59206709	proline rich 11 [Source:HGNC Symbol;Acc:HGNC:25619]	no	no	no	no
ENSG00000068615	50	100	2	REEP1	86213993	86338083	receptor accessory protein 1 [Source:HGNC Symbol;Acc:HGNC:25786]	no	no	no	no
ENSG00000069869	50	100	15	NEDD4	55826922	55993660	NEDD4 E3 ubiquitin protein ligase [Source:HGNC Symbol;Acc:HGNC:7727]	no	no	no	no
ENSG00000070182	50	100	14	SPTB	64746283	64879907	spectrin beta, erythrocytic [Source:HGNC Symbol;Acc:HGNC:11274]	no	no	no	no
ENSG00000070269	50	100	14	TMEM260	56488354	56650606	transmembrane protein 260 [Source:HGNC Symbol;Acc:HGNC:20185]	no	no	no	no
ENSG00000070423	50	100	19	RNF126	647526	663233	ring finger protein 126 [Source:HGNC Symbol;Acc:HGNC:21151]	no	no	no	no
ENSG00000070669	50	100	7	ASNS	97851677	97872542	asparagine synthetase (glutamine-hydrolyzing) [Source:HGNC Symbol;Acc:HGNC:753]	no	no	no	no
ENSG00000070814	50	100	5	TCOF1	150357629	150400308	treacle ribosome biogenesis factor 1 [Source:HGNC Symbol;Acc:HGNC:11654]	no	no	no	no
ENSG00000070882	50	100	7	OSBPL3	24796540	24981634	oxysterol binding protein like 3 [Source:HGNC Symbol;Acc:HGNC:16370]	no	no	no	no
ENSG00000071205	50	100	4	ARHGAP10	147732063	148072776	Rho GTPase activating protein 10 [Source:HGNC Symbol;Acc:HGNC:26099]	no	no	no	no
ENSG00000071242	50	100	6	RPS6KA2	166409364	166906451	ribosomal protein S6 kinase A2 [Source:HGNC Symbol;Acc:HGNC:10431]	no	no	no	no
ENSG00000071539	50	100	5	TRIP13	892884	919357	thyroid hormone receptor interactor 13 [Source:HGNC Symbol;Acc:HGNC:12307]	no	no	no	no
ENSG00000072163	50	100	2	LIMS2	127638381	127681786	LIM zinc finger domain containing 2 [Source:HGNC Symbol;Acc:HGNC:16084]	no	no	no	no
ENSG00000072182	50	100	2	ASIC4	219514170	219538772	acid sensing ion channel subunit family member 4 [Source:HGNC Symbol;Acc:HGNC:21263]	no	no	no	no
ENSG00000072195	50	100	2	SPEG	219434843	219493629	striated muscle enriched protein kinase [Source:HGNC Symbol;Acc:HGNC:16901]	no	no	no	no
ENSG00000072310	50	100	17	SREBF1	17810399	17837002	sterol regulatory element binding transcription factor 1 [Source:HGNC Symbol;Acc:HGNC:11289]	no	no	no	no
ENSG00000072571	50	100	5	HMMR	163460203	163491941	hyaluronan mediated motility receptor [Source:HGNC Symbol;Acc:HGNC:5012]	no	no	no	no
ENSG00000072657	50	100	12	TRHDE	72087266	72670758	thyrotropin releasing hormone degrading enzyme [Source:HGNC Symbol;Acc:HGNC:30748]	no	no	no	no
ENSG00000072954	50	100	19	TMEM38A	16661139	16690023	transmembrane protein 38A [Source:HGNC Symbol;Acc:HGNC:28462]	no	no	no	no
ENSG00000073111	50	100	3	MCM2	127598410	127622436	minichromosome maintenance complex component 2 [Source:HGNC Symbol;Acc:HGNC:6944]	no	no	no	no
ENSG00000073417	50	100	15	PDE8A	84980440	85139145	phosphodiesterase 8A [Source:HGNC Symbol;Acc:HGNC:8793]	no	no	no	no
ENSG00000073464	50	100	X	CLCN4	10156975	10237660	chloride voltage-gated channel 4 [Source:HGNC Symbol;Acc:HGNC:2022]	no	no	no	yes
ENSG00000073910	50	100	13	FRY	31846713	32299125	FRY microtubule binding protein [Source:HGNC Symbol;Acc:HGNC:20367]	no	no	no	no
ENSG00000074071	50	100	16	MRPS34	1771890	1773150	mitochondrial ribosomal protein S34 [Source:HGNC Symbol;Acc:HGNC:16618]	no	no	no	no
ENSG00000074410	50	100	15	CA12	63321378	63381846	carbonic anhydrase 12 [Source:HGNC Symbol;Acc:HGNC:1371]	no	no	no	no
ENSG00000074800	50	100	1	ENO1	8861000	8879190	enolase 1 [Source:HGNC Symbol;Acc:HGNC:3350]	no	no	no	no
ENSG00000075035	50	100	12	WSCD2	108129288	108250537	WSC domain containing 2 [Source:HGNC Symbol;Acc:HGNC:29117]	no	no	no	no
ENSG00000075043	50	100	20	KCNQ2	63400208	63472677	potassium voltage-gated channel subfamily Q member 2 [Source:HGNC Symbol;Acc:HGNC:6296]	no	no	no	no
ENSG00000075131	50	100	15	TIPIN	66336191	66386746	TIMELESS interacting protein [Source:HGNC Symbol;Acc:HGNC:30750]	no	no	no	no
ENSG00000075218	50	100	22	GTSE1	46296870	46330810	G2 and S-phase expressed 1 [Source:HGNC Symbol;Acc:HGNC:13698]	no	no	no	no
ENSG00000075340	50	100	2	ADD2	70607618	70768225	adducin 2 [Source:HGNC Symbol;Acc:HGNC:244]	no	no	no	no
ENSG00000075391	50	100	1	RASAL2	178094104	178484147	RAS protein activator like 2 [Source:HGNC Symbol;Acc:HGNC:9874]	no	no	no	no
ENSG00000075426	50	100	2	FOSL2	28392448	28417317	FOS like 2, AP-1 transcription factor subunit [Source:HGNC Symbol;Acc:HGNC:3798]	no	no	no	no
ENSG00000075702	50	100	19	WDR62	36054649	36105108	WD repeat domain 62 [Source:HGNC Symbol;Acc:HGNC:24502]	no	no	no	no
ENSG00000075826	50	100	10	SEC31B	100486646	100519864	SEC31 homolog B, COPII coat complex component [Source:HGNC Symbol;Acc:HGNC:23197]	no	no	no	no
ENSG00000076003	50	100	2	MCM6	135839626	135876443	minichromosome maintenance complex component 6 [Source:HGNC Symbol;Acc:HGNC:6949]	no	no	no	no
ENSG00000076258	50	100	1	FMO4	171314183	171342084	flavin containing dimethylaniline monoxygenase 4 [Source:HGNC Symbol;Acc:HGNC:3772]	no	no	no	no
ENSG00000076344	50	100	16	RGS11	268301	275980	regulator of G protein signaling 11 [Source:HGNC Symbol;Acc:HGNC:9993]	no	no	no	no
ENSG00000076554	50	100	8	TPD52	80034745	80231232	tumor protein D52 [Source:HGNC Symbol;Acc:HGNC:12005]	no	no	no	no
ENSG00000076662	50	100	19	ICAM3	10333776	10339661	intercellular adhesion molecule 3 [Source:HGNC Symbol;Acc:HGNC:5346]	no	no	no	no
ENSG00000076770	50	100	X	MBNL3	132369320	132489968	muscleblind like splicing regulator 3 [Source:HGNC Symbol;Acc:HGNC:20564]	no	no	no	yes
ENSG00000076864	50	100	1	RAP1GAP	21596221	21669357	RAP1 GTPase activating protein [Source:HGNC Symbol;Acc:HGNC:9858]	no	no	no	no
ENSG00000077152	50	100	1	UBE2T	202331544	202341984	ubiquitin conjugating enzyme E2 T [Source:HGNC Symbol;Acc:HGNC:25009]	no	no	no	no
ENSG00000077274	50	100	X	CAPN6	111245099	111270483	calpain 6 [Source:HGNC Symbol;Acc:HGNC:1483]	no	no	no	yes
ENSG00000077312	50	100	19	SNRPA	40750637	40765389	small nuclear ribonucleoprotein polypeptide A [Source:HGNC Symbol;Acc:HGNC:11151]	no	no	no	no
ENSG00000077327	50	100	10	SPAG6	22345445	22454224	sperm associated antigen 6 [Source:HGNC Symbol;Acc:HGNC:11215]	no	no	no	no
ENSG00000077348	50	100	19	EXOSC5	41386371	41397362	exosome component 5 [Source:HGNC Symbol;Acc:HGNC:24662]	no	no	no	no
ENSG00000077498	50	100	11	TYR	89177875	89295759	tyrosinase [Source:HGNC Symbol;Acc:HGNC:12442]	no	no	no	no
ENSG00000077514	50	100	11	POLD3	74493851	74669117	DNA polymerase delta 3, accessory subunit [Source:HGNC Symbol;Acc:HGNC:20932]	no	no	no	no
ENSG00000077522	50	100	1	ACTN2	236664141	236764631	actinin alpha 2 [Source:HGNC Symbol;Acc:HGNC:164]	no	no	no	no
ENSG00000077585	50	100	1	GPR137B	236142505	236221865	G protein-coupled receptor 137B [Source:HGNC Symbol;Acc:HGNC:11862]	no	no	no	no
ENSG00000078053	50	100	7	AMPH	38383704	38631420	amphiphysin [Source:HGNC Symbol;Acc:HGNC:471]	no	no	no	no
ENSG00000078596	50	100	X	ITM2A	79360384	79367667	integral membrane protein 2A [Source:HGNC Symbol;Acc:HGNC:6173]	no	no	no	yes
ENSG00000078804	50	100	20	TP53INP2	34704339	34713439	tumor protein p53 inducible nuclear protein 2 [Source:HGNC Symbol;Acc:HGNC:16104]	no	no	no	no
ENSG00000079101	50	100	18	CLUL1	596988	650334	clusterin like 1 [Source:HGNC Symbol;Acc:HGNC:2096]	no	no	no	no
ENSG00000079150	50	100	2	FKBP7	178463664	178478600	FKBP prolyl isomerase 7 [Source:HGNC Symbol;Acc:HGNC:3723]	no	no	no	no
ENSG00000079156	50	100	2	OSBPL6	178194481	178402893	oxysterol binding protein like 6 [Source:HGNC Symbol;Acc:HGNC:16388]	no	no	no	no
ENSG00000079459	50	100	8	FDFT1	11795573	11839304	farnesyl-diphosphate farnesyltransferase 1 [Source:HGNC Symbol;Acc:HGNC:3629]	no	no	no	no
ENSG00000079616	50	100	16	KIF22	29790727	29805385	kinesin family member 22 [Source:HGNC Symbol;Acc:HGNC:6391]	no	no	no	no
ENSG00000080166	50	100	13	DCT	94436811	94479682	dopachrome tautomerase [Source:HGNC Symbol;Acc:HGNC:2709]	no	no	no	no
ENSG00000080200	50	100	3	CRYBG3	97822011	97944984	crystallin beta-gamma domain containing 3 [Source:HGNC Symbol;Acc:HGNC:34427]	no	no	no	no
ENSG00000080493	50	100	4	SLC4A4	71062667	71572087	solute carrier family 4 member 4 [Source:HGNC Symbol;Acc:HGNC:11030]	no	no	no	no
ENSG00000080561	50	100	X	MID2	107825755	107931637	midline 2 [Source:HGNC Symbol;Acc:HGNC:7096]	no	no	yes	no
ENSG00000080573	50	100	19	COL5A3	9959561	10010504	collagen type V alpha 3 chain [Source:HGNC Symbol;Acc:HGNC:14864]	no	no	no	no
ENSG00000080644	50	100	15	CHRNA3	78593052	78621295	cholinergic receptor nicotinic alpha 3 subunit [Source:HGNC Symbol;Acc:HGNC:1957]	no	no	no	no
ENSG00000080709	50	100	5	KCNN2	114055926	114496500	potassium calcium-activated channel subfamily N member 2 [Source:HGNC Symbol;Acc:HGNC:6291]	no	no	no	no
ENSG00000080823	50	100	14	MOK	102224500	102305190	MOK protein kinase [Source:HGNC Symbol;Acc:HGNC:9833]	no	no	no	no
ENSG00000080824	50	100	14	HSP90AA1	102080742	102139699	heat shock protein 90 alpha family class A member 1 [Source:HGNC Symbol;Acc:HGNC:5253]	no	no	no	no
ENSG00000080854	50	100	11	IGSF9B	133896438	133956968	immunoglobulin superfamily member 9B [Source:HGNC Symbol;Acc:HGNC:32326]	no	no	no	no
ENSG00000081041	50	100	4	CXCL2	74097040	74099196	C-X-C motif chemokine ligand 2 [Source:HGNC Symbol;Acc:HGNC:4603]	no	no	no	no
ENSG00000081138	50	100	18	CDH7	65750252	65890337	cadherin 7 [Source:HGNC Symbol;Acc:HGNC:1766]	no	no	no	no
ENSG00000081148	50	100	3	IMPG2	101222546	101320575	interphotoreceptor matrix proteoglycan 2 [Source:HGNC Symbol;Acc:HGNC:18362]	no	no	no	no
ENSG00000081803	50	100	7	CADPS2	122318411	122886759	calcium dependent secretion activator 2 [Source:HGNC Symbol;Acc:HGNC:16018]	no	no	no	no
ENSG00000082014	50	100	7	SMARCD3	151238764	151277896	SWI/SNF related, matrix associated, actin dependent regulator of chromatin, subfamily d, member 3 [Source:HGNC Symbol;Acc:HGNC:11108]	no	no	no	no
ENSG00000082212	50	100	18	ME2	50879080	50954257	malic enzyme 2 [Source:HGNC Symbol;Acc:HGNC:6984]	no	no	no	no
ENSG00000083067	50	100	9	TRPM3	70529060	71446904	transient receptor potential cation channel subfamily M member 3 [Source:HGNC Symbol;Acc:HGNC:17992]	no	no	no	no
ENSG00000083097	50	100	6	DOP1A	83067666	83171350	DOP1 leucine zipper like protein A [Source:HGNC Symbol;Acc:HGNC:21194]	no	no	no	no
ENSG00000083750	50	100	X	RRAGB	55717749	55758774	Ras related GTP binding B [Source:HGNC Symbol;Acc:HGNC:19901]	no	no	no	yes
ENSG00000083838	50	100	19	ZNF446	58474017	58481230	zinc finger protein 446 [Source:HGNC Symbol;Acc:HGNC:21036]	no	no	no	no
ENSG00000084628	50	100	1	NKAIN1	31179745	31239887	sodium/potassium transporting ATPase interacting 1 [Source:HGNC Symbol;Acc:HGNC:25743]	no	no	no	no
ENSG00000084676	50	100	2	NCOA1	24491254	24770702	nuclear receptor coactivator 1 [Source:HGNC Symbol;Acc:HGNC:7668]	no	no	no	no
ENSG00000084764	50	100	2	MAPRE3	26970637	27027219	microtubule associated protein RP/EB family member 3 [Source:HGNC Symbol;Acc:HGNC:6892]	no	no	no	no
ENSG00000085117	50	100	11	CD82	44564427	44620358	CD82 molecule [Source:HGNC Symbol;Acc:HGNC:6210]	no	no	no	no
ENSG00000085415	50	100	18	SEH1L	12947133	12987536	SEH1 like nucleoporin [Source:HGNC Symbol;Acc:HGNC:30379]	no	no	no	no
ENSG00000085465	50	100	1	OVGP1	111414319	111427735	oviductal glycoprotein 1 [Source:HGNC Symbol;Acc:HGNC:8524]	no	no	no	no
ENSG00000085514	50	100	7	PILRA	100367530	100400096	paired immunoglobin like type 2 receptor alpha [Source:HGNC Symbol;Acc:HGNC:20396]	no	no	no	no
ENSG00000085662	50	100	7	AKR1B1	134442356	134459284	aldo-keto reductase family 1 member B [Source:HGNC Symbol;Acc:HGNC:381]	no	no	no	no
ENSG00000085741	50	100	11	WNT11	76186325	76210736	Wnt family member 11 [Source:HGNC Symbol;Acc:HGNC:12776]	no	no	no	no
ENSG00000085840	50	100	1	ORC1	52372829	52404423	origin recognition complex subunit 1 [Source:HGNC Symbol;Acc:HGNC:8487]	no	no	no	no
ENSG00000086200	50	100	5	IPO11	62403972	62628582	importin 11 [Source:HGNC Symbol;Acc:HGNC:20628]	no	no	no	no
ENSG00000086619	50	100	1	ERO1B	236214681	236282019	endoplasmic reticulum oxidoreductase 1 beta [Source:HGNC Symbol;Acc:HGNC:14355]	no	no	no	no
ENSG00000087245	50	100	16	MMP2	55389700	55506691	matrix metallopeptidase 2 [Source:HGNC Symbol;Acc:HGNC:7166]	no	no	no	no
ENSG00000087258	50	100	16	GNAO1	56191390	56357444	G protein subunit alpha o1 [Source:HGNC Symbol;Acc:HGNC:4389]	no	no	no	no
ENSG00000087303	50	100	14	NID2	52004809	52069059	nidogen 2 [Source:HGNC Symbol;Acc:HGNC:13389]	no	no	no	no
ENSG00000087586	50	100	20	AURKA	56369389	56392337	aurora kinase A [Source:HGNC Symbol;Acc:HGNC:11393]	no	no	no	no
ENSG00000087842	50	100	X	PIR	15384799	15493564	pirin [Source:HGNC Symbol;Acc:HGNC:30048]	no	no	yes	no
ENSG00000088325	50	100	20	TPX2	31739271	31801805	TPX2 microtubule nucleation factor [Source:HGNC Symbol;Acc:HGNC:1249]	no	no	no	no
ENSG00000088682	50	100	16	COQ9	57447425	57461270	coenzyme Q9 [Source:HGNC Symbol;Acc:HGNC:25302]	no	no	no	no
ENSG00000088766	50	100	20	CRLS1	6006093	6040053	cardiolipin synthase 1 [Source:HGNC Symbol;Acc:HGNC:16148]	no	no	no	no
ENSG00000088992	50	100	12	TESC	117038923	117099479	tescalcin [Source:HGNC Symbol;Acc:HGNC:26065]	no	no	no	no
ENSG00000089041	50	100	12	P2RX7	121132819	121188032	purinergic receptor P2X 7 [Source:HGNC Symbol;Acc:HGNC:8537]	no	no	no	no
ENSG00000089101	50	100	20	CFAP61	20052514	20360703	cilia and flagella associated protein 61 [Source:HGNC Symbol;Acc:HGNC:15872]	no	no	no	no
ENSG00000089472	50	100	X	HEPH	66162671	66268867	hephaestin [Source:HGNC Symbol;Acc:HGNC:4866]	no	no	no	yes
ENSG00000089486	50	100	16	CDIP1	4510669	4538828	cell death inducing p53 target 1 [Source:HGNC Symbol;Acc:HGNC:13234]	no	no	no	no
ENSG00000089682	50	100	X	RBM41	107061885	107118823	RNA binding motif protein 41 [Source:HGNC Symbol;Acc:HGNC:25617]	no	no	no	yes
ENSG00000089685	50	100	17	BIRC5	78214186	78225636	baculoviral IAP repeat containing 5 [Source:HGNC Symbol;Acc:HGNC:593]	no	no	no	no
ENSG00000090097	50	100	3	PCBP4	51957454	51974016	poly(rC) binding protein 4 [Source:HGNC Symbol;Acc:HGNC:8652]	no	no	no	no
ENSG00000090447	50	100	16	TFAP4	4257186	4273075	transcription factor AP-4 [Source:HGNC Symbol;Acc:HGNC:11745]	no	no	no	no
ENSG00000090861	50	100	16	AARS1	70251983	70289707	alanyl-tRNA synthetase 1 [Source:HGNC Symbol;Acc:HGNC:20]	no	no	no	no
ENSG00000091073	50	100	7	DTX2	76461676	76505995	deltex E3 ubiquitin ligase 2 [Source:HGNC Symbol;Acc:HGNC:15973]	no	no	no	no
ENSG00000091128	50	100	7	LAMB4	108023548	108130361	laminin subunit beta 4 [Source:HGNC Symbol;Acc:HGNC:6491]	no	no	no	no
ENSG00000091129	50	100	7	NRCAM	108147623	108456717	neuronal cell adhesion molecule [Source:HGNC Symbol;Acc:HGNC:7994]	no	no	no	no
ENSG00000091262	50	100	16	ABCC6	16149565	16223522	ATP binding cassette subfamily C member 6 [Source:HGNC Symbol;Acc:HGNC:57]	no	no	no	no
ENSG00000091656	50	100	8	ZFHX4	76681239	76867281	zinc finger homeobox 4 [Source:HGNC Symbol;Acc:HGNC:30939]	no	no	no	no
ENSG00000091879	50	100	8	ANGPT2	6499632	6563409	angiopoietin 2 [Source:HGNC Symbol;Acc:HGNC:485]	no	no	no	no
ENSG00000092051	50	100	14	JPH4	23568038	23578790	junctophilin 4 [Source:HGNC Symbol;Acc:HGNC:20156]	no	no	no	no
ENSG00000092068	50	100	14	SLC7A8	23125295	23183674	solute carrier family 7 member 8 [Source:HGNC Symbol;Acc:HGNC:11066]	no	no	no	no
ENSG00000092208	50	100	14	GEMIN2	39114285	39136973	gem nuclear organelle associated protein 2 [Source:HGNC Symbol;Acc:HGNC:10884]	no	no	no	no
ENSG00000092421	50	100	5	SEMA6A	116443555	116574823	semaphorin 6A [Source:HGNC Symbol;Acc:HGNC:10738]	no	no	no	no
ENSG00000092529	50	100	15	CAPN3	42359498	42412949	calpain 3 [Source:HGNC Symbol;Acc:HGNC:1480]	no	no	no	no
ENSG00000092607	50	100	1	TBX15	118883046	118989556	T-box transcription factor 15 [Source:HGNC Symbol;Acc:HGNC:11594]	no	no	no	no
ENSG00000092621	50	100	1	PHGDH	119648411	119744218	phosphoglycerate dehydrogenase [Source:HGNC Symbol;Acc:HGNC:8923]	no	no	no	no
ENSG00000092853	50	100	1	CLSPN	35720218	35769978	claspin [Source:HGNC Symbol;Acc:HGNC:19715]	no	no	no	no
ENSG00000092964	50	100	8	DPYSL2	26514031	26658178	dihydropyrimidinase like 2 [Source:HGNC Symbol;Acc:HGNC:3014]	no	no	no	no
ENSG00000093009	50	100	22	CDC45	19479457	19520612	cell division cycle 45 [Source:HGNC Symbol;Acc:HGNC:1739]	no	no	no	no
ENSG00000094804	50	100	17	CDC6	40287879	40304657	cell division cycle 6 [Source:HGNC Symbol;Acc:HGNC:1744]	no	no	no	no
ENSG00000095397	50	100	9	WHRN	114402080	114505473	whirlin [Source:HGNC Symbol;Acc:HGNC:16361]	no	no	no	no
ENSG00000095739	50	100	10	BAMBI	28677510	28682932	BMP and activin membrane bound inhibitor [Source:HGNC Symbol;Acc:HGNC:30251]	no	no	no	no
ENSG00000096060	50	100	6	FKBP5	35573585	35728583	FKBP prolyl isomerase 5 [Source:HGNC Symbol;Acc:HGNC:3721]	no	no	no	no
ENSG00000096968	50	100	9	JAK2	4984390	5129948	Janus kinase 2 [Source:HGNC Symbol;Acc:HGNC:6192]	no	no	no	no
ENSG00000097021	50	100	1	ACOT7	6264269	6393767	acyl-CoA thioesterase 7 [Source:HGNC Symbol;Acc:HGNC:24157]	no	no	no	no
ENSG00000097046	50	100	1	CDC7	91500851	91525764	cell division cycle 7 [Source:HGNC Symbol;Acc:HGNC:1745]	no	no	no	no
ENSG00000099194	50	100	10	SCD	100347233	100364826	stearoyl-CoA desaturase [Source:HGNC Symbol;Acc:HGNC:10571]	no	no	no	no
ENSG00000099282	50	100	10	TSPAN15	69451465	69507666	tetraspanin 15 [Source:HGNC Symbol;Acc:HGNC:23298]	no	no	no	no
ENSG00000099625	50	100	19	CBARP	1228287	1238027	CACN subunit beta associated regulatory protein [Source:HGNC Symbol;Acc:HGNC:28617]	no	no	no	no
ENSG00000099840	50	100	19	IZUMO4	2096429	2099593	IZUMO family member 4 [Source:HGNC Symbol;Acc:HGNC:26950]	no	no	no	no
ENSG00000099901	50	100	22	RANBP1	20115938	20127355	RAN binding protein 1 [Source:HGNC Symbol;Acc:HGNC:9847]	no	no	no	no
ENSG00000100065	50	100	22	CARD10	37490362	37519542	caspase recruitment domain family member 10 [Source:HGNC Symbol;Acc:HGNC:16422]	no	no	no	no
ENSG00000100077	50	100	22	GRK3	25564675	25729294	G protein-coupled receptor kinase 3 [Source:HGNC Symbol;Acc:HGNC:290]	no	no	no	no
ENSG00000100078	50	100	22	PLA2G3	31134807	31140508	phospholipase A2 group III [Source:HGNC Symbol;Acc:HGNC:17934]	no	no	no	no
ENSG00000100092	50	100	22	SH3BP1	37634654	37656117	SH3 domain binding protein 1 [Source:HGNC Symbol;Acc:HGNC:10824]	no	no	no	no
ENSG00000100122	50	100	22	CRYBB1	26599278	26618027	crystallin beta B1 [Source:HGNC Symbol;Acc:HGNC:2397]	no	no	no	no
ENSG00000100154	50	100	22	TTC28	27978014	28679840	tetratricopeptide repeat domain 28 [Source:HGNC Symbol;Acc:HGNC:29179]	no	no	no	no
ENSG00000100162	50	100	22	CENPM	41938737	41947152	centromere protein M [Source:HGNC Symbol;Acc:HGNC:18352]	no	no	no	no
ENSG00000100167	50	100	22	SEPTIN3	41969443	41998221	septin 3 [Source:HGNC Symbol;Acc:HGNC:10750]	no	no	no	no
ENSG00000100206	50	100	22	DMC1	38518948	38570204	DNA meiotic recombinase 1 [Source:HGNC Symbol;Acc:HGNC:2927]	no	no	no	no
ENSG00000100219	50	100	22	XBP1	28794555	28800597	X-box binding protein 1 [Source:HGNC Symbol;Acc:HGNC:12801]	no	no	no	no
ENSG00000100228	50	100	22	RAB36	23145366	23165663	RAB36, member RAS oncogene family [Source:HGNC Symbol;Acc:HGNC:9775]	no	no	no	no
ENSG00000100285	50	100	22	NEFH	29480218	29491390	neurofilament heavy chain [Source:HGNC Symbol;Acc:HGNC:7737]	no	no	no	no
ENSG00000100304	50	100	22	TTLL12	43166622	43187134	tubulin tyrosine ligase like 12 [Source:HGNC Symbol;Acc:HGNC:28974]	no	no	no	no
ENSG00000100314	50	100	22	CABP7	29720003	29731833	calcium binding protein 7 [Source:HGNC Symbol;Acc:HGNC:20834]	no	no	no	no
ENSG00000100330	50	100	22	MTMR3	29883169	30030868	myotubularin related protein 3 [Source:HGNC Symbol;Acc:HGNC:7451]	no	no	no	no
ENSG00000100344	50	100	22	PNPLA3	43923792	43964488	patatin like phospholipase domain containing 3 [Source:HGNC Symbol;Acc:HGNC:18590]	no	no	no	no
ENSG00000100360	50	100	22	IFT27	36758202	36776256	intraflagellar transport 27 [Source:HGNC Symbol;Acc:HGNC:18626]	no	no	no	no
ENSG00000100410	50	100	22	PHF5A	41459717	41468692	PHD finger protein 5A [Source:HGNC Symbol;Acc:HGNC:18000]	no	no	no	no
ENSG00000100445	50	100	14	SDR39U1	24439766	24442905	short chain dehydrogenase/reductase family 39U member 1 [Source:HGNC Symbol;Acc:HGNC:20275]	no	no	no	no
ENSG00000100473	50	100	14	COCH	30874514	30895065	cochlin [Source:HGNC Symbol;Acc:HGNC:2180]	no	no	no	no
ENSG00000100526	50	100	14	CDKN3	54396849	54420218	cyclin dependent kinase inhibitor 3 [Source:HGNC Symbol;Acc:HGNC:1791]	no	no	no	no
ENSG00000100583	50	100	14	SAMD15	77376689	77392163	sterile alpha motif domain containing 15 [Source:HGNC Symbol;Acc:HGNC:18631]	no	no	no	no
ENSG00000100596	50	100	14	SPTLC2	77505997	77616637	serine palmitoyltransferase long chain base subunit 2 [Source:HGNC Symbol;Acc:HGNC:11278]	no	no	no	no
ENSG00000100599	50	100	14	RIN3	92513781	92688994	Ras and Rab interactor 3 [Source:HGNC Symbol;Acc:HGNC:18751]	no	no	no	no
ENSG00000100605	50	100	14	ITPK1	92936914	93116320	inositol-tetrakisphosphate 1-kinase [Source:HGNC Symbol;Acc:HGNC:6177]	no	no	no	no
ENSG00000100626	50	100	14	GALNT16	69259277	69357033	polypeptide N-acetylgalactosaminyltransferase 16 [Source:HGNC Symbol;Acc:HGNC:23233]	no	no	no	no
ENSG00000100628	50	100	14	ASB2	93934166	93976739	ankyrin repeat and SOCS box containing 2 [Source:HGNC Symbol;Acc:HGNC:16012]	no	no	no	no
ENSG00000100678	50	100	14	SLC8A3	70044215	70189480	solute carrier family 8 member A3 [Source:HGNC Symbol;Acc:HGNC:11070]	no	no	no	no
ENSG00000100749	50	100	14	VRK1	96797304	96954846	VRK serine/threonine kinase 1 [Source:HGNC Symbol;Acc:HGNC:12718]	no	no	no	no
ENSG00000100889	50	100	14	PCK2	24094053	24110598	phosphoenolpyruvate carboxykinase 2, mitochondrial [Source:HGNC Symbol;Acc:HGNC:8725]	no	no	no	no
ENSG00000100890	50	100	14	PRORP	35121846	35277622	protein only RNase P catalytic subunit [Source:HGNC Symbol;Acc:HGNC:19958]	no	no	no	no
ENSG00000101003	50	100	20	GINS1	25391008	25452700	GINS complex subunit 1 [Source:HGNC Symbol;Acc:HGNC:28980]	no	no	no	no
ENSG00000101017	50	100	20	CD40	46118271	46129863	CD40 molecule [Source:HGNC Symbol;Acc:HGNC:11919]	no	no	no	no
ENSG00000101057	50	100	20	MYBL2	43667019	43716495	MYB proto-oncogene like 2 [Source:HGNC Symbol;Acc:HGNC:7548]	no	no	no	no
ENSG00000101096	50	100	20	NFATC2	51386957	51562831	nuclear factor of activated T cells 2 [Source:HGNC Symbol;Acc:HGNC:7776]	no	no	no	no
ENSG00000101115	50	100	20	SALL4	51782331	51802521	spalt like transcription factor 4 [Source:HGNC Symbol;Acc:HGNC:15924]	no	no	no	no
ENSG00000101134	50	100	20	DOK5	54475593	54651169	docking protein 5 [Source:HGNC Symbol;Acc:HGNC:16173]	no	no	no	no
ENSG00000101187	50	100	20	SLCO4A1	62642503	62685785	solute carrier organic anion transporter family member 4A1 [Source:HGNC Symbol;Acc:HGNC:10953]	no	no	no	no
ENSG00000101230	50	100	20	ISM1	13221274	13300651	isthmin 1 [Source:HGNC Symbol;Acc:HGNC:16213]	no	no	no	no
ENSG00000101236	50	100	20	RNF24	3927309	4015558	ring finger protein 24 [Source:HGNC Symbol;Acc:HGNC:13779]	no	no	no	no
ENSG00000101255	50	100	20	TRIB3	362835	397559	tribbles pseudokinase 3 [Source:HGNC Symbol;Acc:HGNC:16228]	no	no	no	no
ENSG00000101400	50	100	20	SNTA1	33407957	33443763	syntrophin alpha 1 [Source:HGNC Symbol;Acc:HGNC:11167]	no	no	no	no
ENSG00000101412	50	100	20	E2F1	33675477	33686385	E2F transcription factor 1 [Source:HGNC Symbol;Acc:HGNC:3113]	no	no	no	no
ENSG00000101445	50	100	20	PPP1R16B	38805697	38923024	protein phosphatase 1 regulatory subunit 16B [Source:HGNC Symbol;Acc:HGNC:15850]	no	no	no	no
ENSG00000101447	50	100	20	FAM83D	38926312	38953106	family with sequence similarity 83 member D [Source:HGNC Symbol;Acc:HGNC:16122]	no	no	no	no
ENSG00000101460	50	100	20	MAP1LC3A	34546854	34560345	microtubule associated protein 1 light chain 3 alpha [Source:HGNC Symbol;Acc:HGNC:6838]	no	no	no	no
ENSG00000101605	50	100	18	MYOM1	3066807	3219968	myomesin 1 [Source:HGNC Symbol;Acc:HGNC:7613]	no	no	no	no
ENSG00000101665	50	100	18	SMAD7	48919853	48950965	SMAD family member 7 [Source:HGNC Symbol;Acc:HGNC:6773]	no	no	no	no
ENSG00000101773	50	100	18	RBBP8	22798261	23026488	RB binding protein 8, endonuclease [Source:HGNC Symbol;Acc:HGNC:9891]	no	no	no	no
ENSG00000101868	50	100	X	POLA1	24693873	24996986	DNA polymerase alpha 1, catalytic subunit [Source:HGNC Symbol;Acc:HGNC:9173]	no	no	no	yes
ENSG00000101871	50	100	X	MID1	10445310	10833654	midline 1 [Source:HGNC Symbol;Acc:HGNC:7095]	no	no	no	yes
ENSG00000101911	50	100	X	PRPS2	12791355	12824222	phosphoribosyl pyrophosphate synthetase 2 [Source:HGNC Symbol;Acc:HGNC:9465]	no	no	no	yes
ENSG00000101938	50	100	X	CHRDL1	110673856	110795819	chordin like 1 [Source:HGNC Symbol;Acc:HGNC:29861]	no	no	no	yes
ENSG00000101945	50	100	X	SUV39H1	48695554	48709016	SUV39H1 histone lysine methyltransferase [Source:HGNC Symbol;Acc:HGNC:11479]	no	no	no	yes
ENSG00000101974	50	100	X	ATP11C	139726346	139945276	ATPase phospholipid transporting 11C [Source:HGNC Symbol;Acc:HGNC:13554]	no	no	no	yes
ENSG00000101977	50	100	X	MCF2	139581770	139708216	MCF.2 cell line derived transforming sequence [Source:HGNC Symbol;Acc:HGNC:6940]	no	no	no	yes
ENSG00000102098	50	100	X	SCML2	18239313	18354688	Scm polycomb group protein like 2 [Source:HGNC Symbol;Acc:HGNC:10581]	no	no	no	yes
ENSG00000102109	50	100	X	PCSK1N	48831096	48835610	proprotein convertase subtilisin/kexin type 1 inhibitor [Source:HGNC Symbol;Acc:HGNC:17301]	no	no	no	no
ENSG00000102144	50	100	X	PGK1	77910739	78129295	phosphoglycerate kinase 1 [Source:HGNC Symbol;Acc:HGNC:8896]	no	no	no	yes
ENSG00000102172	50	100	X	SMS	21940709	21994837	spermine synthase [Source:HGNC Symbol;Acc:HGNC:11123]	no	no	no	yes
ENSG00000102178	50	100	X	UBL4A	154483717	154486615	ubiquitin like 4A [Source:HGNC Symbol;Acc:HGNC:12505]	no	no	no	yes
ENSG00000102271	50	100	X	KLHL4	87517409	87670050	kelch like family member 4 [Source:HGNC Symbol;Acc:HGNC:6355]	no	no	no	yes
ENSG00000102290	50	100	X	PCDH11X	91779261	92623230	protocadherin 11 X-linked [Source:HGNC Symbol;Acc:HGNC:8656]	no	no	yes	no
ENSG00000102349	50	100	X	KLF8	56232356	56291531	KLF transcription factor 8 [Source:HGNC Symbol;Acc:HGNC:6351]	no	no	no	yes
ENSG00000102362	50	100	X	SYTL4	100671783	100732123	synaptotagmin like 4 [Source:HGNC Symbol;Acc:HGNC:15588]	no	yes	no	no
ENSG00000102384	50	100	X	CENPI	101098188	101166126	centromere protein I [Source:HGNC Symbol;Acc:HGNC:3968]	no	no	no	yes
ENSG00000102387	50	100	X	TAF7L	101268253	101293057	TATA-box binding protein associated factor 7 like [Source:HGNC Symbol;Acc:HGNC:11548]	no	yes	no	no
ENSG00000102445	50	100	13	RUBCNL	46334681	46438190	rubicon like autophagy enhancer [Source:HGNC Symbol;Acc:HGNC:20420]	no	no	no	no
ENSG00000102452	50	100	13	NALCN	101053776	101416508	sodium leak channel, non-selective [Source:HGNC Symbol;Acc:HGNC:19082]	no	no	no	no
ENSG00000102468	50	100	13	HTR2A	46831546	46897076	5-hydroxytryptamine receptor 2A [Source:HGNC Symbol;Acc:HGNC:5293]	no	no	no	no
ENSG00000102575	50	100	19	ACP5	11574653	11579993	acid phosphatase 5, tartrate resistant [Source:HGNC Symbol;Acc:HGNC:124]	no	no	no	no
ENSG00000102805	50	100	13	CLN5	76990660	77019143	CLN5 intracellular trafficking protein [Source:HGNC Symbol;Acc:HGNC:2076]	no	no	no	no
ENSG00000102871	50	100	16	TRADD	67154185	67159909	TNFRSF1A associated via death domain [Source:HGNC Symbol;Acc:HGNC:12030]	no	no	no	no
ENSG00000102900	50	100	16	NUP93	56730118	56850286	nucleoporin 93 [Source:HGNC Symbol;Acc:HGNC:28958]	no	no	no	no
ENSG00000102904	50	100	16	TSNAXIP1	67806765	67832148	translin associated factor X interacting protein 1 [Source:HGNC Symbol;Acc:HGNC:18586]	no	no	no	no
ENSG00000102924	50	100	16	CBLN1	49277917	49281838	cerebellin 1 precursor [Source:HGNC Symbol;Acc:HGNC:1543]	no	no	no	no
ENSG00000103257	50	100	16	SLC7A5	87830023	87869507	solute carrier family 7 member 5 [Source:HGNC Symbol;Acc:HGNC:11063]	no	no	no	no
ENSG00000103316	50	100	16	CRYM	21238874	21303083	crystallin mu [Source:HGNC Symbol;Acc:HGNC:2418]	no	no	no	no
ENSG00000103449	50	100	16	SALL1	51135982	51152334	spalt like transcription factor 1 [Source:HGNC Symbol;Acc:HGNC:10524]	no	no	no	no
ENSG00000103460	50	100	16	TOX3	52436417	52547802	TOX high mobility group box family member 3 [Source:HGNC Symbol;Acc:HGNC:11972]	no	no	no	no
ENSG00000103653	50	100	15	CSK	74782080	74803197	C-terminal Src kinase [Source:HGNC Symbol;Acc:HGNC:2444]	no	no	no	no
ENSG00000103710	50	100	15	RASL12	65053337	65076690	RAS like family 12 [Source:HGNC Symbol;Acc:HGNC:30289]	no	no	no	no
ENSG00000103888	50	100	15	CEMIP	80779343	80951776	cell migration inducing hyaluronidase 1 [Source:HGNC Symbol;Acc:HGNC:29213]	no	no	no	no
ENSG00000104044	50	100	15	OCA2	27754875	28099315	OCA2 melanosomal transmembrane protein [Source:HGNC Symbol;Acc:HGNC:8101]	no	no	no	no
ENSG00000104081	50	100	15	BMF	40087890	40108892	Bcl2 modifying factor [Source:HGNC Symbol;Acc:HGNC:24132]	no	no	no	no
ENSG00000104112	50	100	15	SCG3	51681492	51721026	secretogranin III [Source:HGNC Symbol;Acc:HGNC:13707]	no	no	no	no
ENSG00000104213	50	100	8	PDGFRL	17576433	17644071	platelet derived growth factor receptor like [Source:HGNC Symbol;Acc:HGNC:8805]	no	no	no	no
ENSG00000104219	50	100	8	ZDHHC2	17156482	17224799	zinc finger DHHC-type palmitoyltransferase 2 [Source:HGNC Symbol;Acc:HGNC:18469]	no	no	no	no
ENSG00000104324	50	100	8	CPQ	96645242	97149654	carboxypeptidase Q [Source:HGNC Symbol;Acc:HGNC:16910]	no	no	no	no
ENSG00000104325	50	100	8	DECR1	90001405	90053633	2,4-dienoyl-CoA reductase 1 [Source:HGNC Symbol;Acc:HGNC:2753]	no	no	no	no
ENSG00000104361	50	100	8	NIPAL2	98189826	98294393	NIPA like domain containing 2 [Source:HGNC Symbol;Acc:HGNC:25854]	no	no	no	no
ENSG00000104450	50	100	8	SPAG1	100157906	100259278	sperm associated antigen 1 [Source:HGNC Symbol;Acc:HGNC:11212]	no	no	no	no
ENSG00000104490	50	100	8	NCALD	101686542	102124907	neurocalcin delta [Source:HGNC Symbol;Acc:HGNC:7655]	no	no	no	no
ENSG00000104635	50	100	8	SLC39A14	22367278	22434129	solute carrier family 39 member 14 [Source:HGNC Symbol;Acc:HGNC:20858]	no	no	no	no
ENSG00000104689	50	100	8	TNFRSF10A	23190452	23225102	TNF receptor superfamily member 10a [Source:HGNC Symbol;Acc:HGNC:11904]	no	no	no	no
ENSG00000104722	50	100	8	NEFM	24913758	24919098	neurofilament medium chain [Source:HGNC Symbol;Acc:HGNC:7734]	no	no	no	no
ENSG00000104738	50	100	8	MCM4	47960185	47978160	minichromosome maintenance complex component 4 [Source:HGNC Symbol;Acc:HGNC:6947]	no	no	no	no
ENSG00000104756	50	100	8	KCTD9	25427847	25458476	potassium channel tetramerization domain containing 9 [Source:HGNC Symbol;Acc:HGNC:22401]	no	no	no	no
ENSG00000104894	50	100	19	CD37	49335171	49343335	CD37 molecule [Source:HGNC Symbol;Acc:HGNC:1666]	no	no	no	no
ENSG00000104904	50	100	19	OAZ1	2269509	2273490	ornithine decarboxylase antizyme 1 [Source:HGNC Symbol;Acc:HGNC:8095]	no	no	no	no
ENSG00000105011	50	100	19	ASF1B	14119512	14136613	anti-silencing function 1B histone chaperone [Source:HGNC Symbol;Acc:HGNC:20996]	no	no	no	no
ENSG00000105143	50	100	19	SLC1A6	14950033	15022990	solute carrier family 1 member 6 [Source:HGNC Symbol;Acc:HGNC:10944]	no	no	no	no
ENSG00000105173	50	100	19	CCNE1	29811991	29824312	cyclin E1 [Source:HGNC Symbol;Acc:HGNC:1589]	no	no	no	no
ENSG00000105202	50	100	19	FBL	39834458	39846379	fibrillarin [Source:HGNC Symbol;Acc:HGNC:3599]	no	no	no	no
ENSG00000105258	50	100	19	POLR2I	36113709	36115213	RNA polymerase II subunit I [Source:HGNC Symbol;Acc:HGNC:9196]	no	no	no	no
ENSG00000105281	50	100	19	SLC1A5	46774883	46788594	solute carrier family 1 member 5 [Source:HGNC Symbol;Acc:HGNC:10943]	no	no	no	no
ENSG00000105409	50	100	19	ATP1A3	41966582	41997497	ATPase Na+/K+ transporting subunit alpha 3 [Source:HGNC Symbol;Acc:HGNC:801]	no	no	no	no
ENSG00000105519	50	100	19	CAPS	5912339	5916211	calcyphosine [Source:HGNC Symbol;Acc:HGNC:1487]	no	no	no	no
ENSG00000105649	50	100	19	RAB3A	18196784	18204042	RAB3A, member RAS oncogene family [Source:HGNC Symbol;Acc:HGNC:9777]	no	no	no	no
ENSG00000105792	50	100	7	CFAP69	90245174	90311063	cilia and flagella associated protein 69 [Source:HGNC Symbol;Acc:HGNC:26107]	no	no	no	no
ENSG00000105808	50	100	7	RASA4	102579646	102616756	RAS p21 protein activator 4 [Source:HGNC Symbol;Acc:HGNC:23181]	no	no	no	no
ENSG00000105825	50	100	7	TFPI2	93885396	93890753	tissue factor pathway inhibitor 2 [Source:HGNC Symbol;Acc:HGNC:11761]	no	no	no	no
ENSG00000105889	50	100	7	STEAP1B	22419444	22727613	STEAP family member 1B [Source:HGNC Symbol;Acc:HGNC:41907]	no	no	no	no
ENSG00000105939	50	100	7	ZC3HAV1	139043515	139132122	zinc finger CCCH-type containing, antiviral 1 [Source:HGNC Symbol;Acc:HGNC:23721]	no	no	no	no
ENSG00000106003	50	100	7	LFNG	2512529	2529177	LFNG O-fucosylpeptide 3-beta-N-acetylglucosaminyltransferase [Source:HGNC Symbol;Acc:HGNC:6560]	no	no	no	no
ENSG00000106012	50	100	7	IQCE	2558972	2614733	IQ motif containing E [Source:HGNC Symbol;Acc:HGNC:29171]	no	no	no	no
ENSG00000106105	50	100	7	GARS1	30580533	30634033	glycyl-tRNA synthetase 1 [Source:HGNC Symbol;Acc:HGNC:4162]	no	no	no	no
ENSG00000106236	50	100	7	NPTX2	98617285	98629869	neuronal pentraxin 2 [Source:HGNC Symbol;Acc:HGNC:7953]	no	no	no	no
ENSG00000106268	50	100	7	NUDT1	2242226	2251146	nudix hydrolase 1 [Source:HGNC Symbol;Acc:HGNC:8048]	no	no	no	no
ENSG00000106278	50	100	7	PTPRZ1	121873089	122062036	protein tyrosine phosphatase receptor type Z1 [Source:HGNC Symbol;Acc:HGNC:9685]	no	no	no	no
ENSG00000106399	50	100	7	RPA3	7636518	7718607	replication protein A3 [Source:HGNC Symbol;Acc:HGNC:10291]	no	no	no	no
ENSG00000106460	50	100	7	TMEM106B	12211270	12243367	transmembrane protein 106B [Source:HGNC Symbol;Acc:HGNC:22407]	no	no	no	no
ENSG00000106479	50	100	7	ZNF862	149838375	149867479	zinc finger protein 862 [Source:HGNC Symbol;Acc:HGNC:34519]	no	no	no	no
ENSG00000106483	50	100	7	SFRP4	37905932	38025695	secreted frizzled related protein 4 [Source:HGNC Symbol;Acc:HGNC:10778]	no	no	no	no
ENSG00000106633	50	100	7	GCK	44143213	44198170	glucokinase [Source:HGNC Symbol;Acc:HGNC:4195]	no	no	no	no
ENSG00000106733	50	100	9	NMRK1	75060573	75088217	nicotinamide riboside kinase 1 [Source:HGNC Symbol;Acc:HGNC:26057]	no	no	no	no
ENSG00000106785	50	100	9	TRIM14	98069275	98119222	tripartite motif containing 14 [Source:HGNC Symbol;Acc:HGNC:16283]	no	no	no	no
ENSG00000106823	50	100	9	ECM2	92493554	92536655	extracellular matrix protein 2 [Source:HGNC Symbol;Acc:HGNC:3154]	no	no	no	no
ENSG00000107165	50	100	9	TYRP1	12685439	12710285	tyrosinase related protein 1 [Source:HGNC Symbol;Acc:HGNC:12450]	no	no	no	no
ENSG00000107249	50	100	9	GLIS3	3824127	4348392	GLIS family zinc finger 3 [Source:HGNC Symbol;Acc:HGNC:28510]	no	no	no	no
ENSG00000107282	50	100	9	APBA1	69427532	69672371	amyloid beta precursor protein binding family A member 1 [Source:HGNC Symbol;Acc:HGNC:578]	no	no	no	no
ENSG00000107338	50	100	9	SHB	37915898	38069227	SH2 domain containing adaptor protein B [Source:HGNC Symbol;Acc:HGNC:10838]	no	no	no	no
ENSG00000107742	50	100	10	SPOCK2	72059034	72089032	SPARC (osteonectin), cwcv and kazal like domains proteoglycan 2 [Source:HGNC Symbol;Acc:HGNC:13564]	no	no	no	no
ENSG00000107798	50	100	10	LIPA	89213569	89414557	lipase A, lysosomal acid type [Source:HGNC Symbol;Acc:HGNC:6617]	no	no	no	no
ENSG00000107819	50	100	10	SFXN3	101031234	101041241	sideroflexin 3 [Source:HGNC Symbol;Acc:HGNC:16087]	no	no	no	no
ENSG00000108106	50	100	19	UBE2S	55399745	55407788	ubiquitin conjugating enzyme E2 S [Source:HGNC Symbol;Acc:HGNC:17895]	no	no	no	no
ENSG00000108187	50	100	10	PBLD	68282660	68333049	phenazine biosynthesis like protein domain containing [Source:HGNC Symbol;Acc:HGNC:23301]	no	no	no	no
ENSG00000108375	50	100	17	RNF43	58353676	58417595	ring finger protein 43 [Source:HGNC Symbol;Acc:HGNC:18505]	no	no	no	no
ENSG00000108384	50	100	17	RAD51C	58692573	58735611	RAD51 paralog C [Source:HGNC Symbol;Acc:HGNC:9820]	no	no	no	no
ENSG00000109099	50	100	17	PMP22	15229773	15272292	peripheral myelin protein 22 [Source:HGNC Symbol;Acc:HGNC:9118]	no	no	no	no
ENSG00000109107	50	100	17	ALDOC	28573115	28576948	aldolase, fructose-bisphosphate C [Source:HGNC Symbol;Acc:HGNC:418]	no	no	no	no
ENSG00000109323	50	100	4	MANBA	102630770	102760994	mannosidase beta [Source:HGNC Symbol;Acc:HGNC:6831]	no	no	no	no
ENSG00000109436	50	100	4	TBC1D9	140620782	140756385	TBC1 domain family member 9 [Source:HGNC Symbol;Acc:HGNC:21710]	no	no	no	no
ENSG00000109610	50	100	4	SOD3	24789912	24800842	superoxide dismutase 3 [Source:HGNC Symbol;Acc:HGNC:11181]	no	no	no	no
ENSG00000109674	50	100	4	NEIL3	177309874	177362936	nei like DNA glycosylase 3 [Source:HGNC Symbol;Acc:HGNC:24573]	no	no	no	no
ENSG00000109743	50	100	4	BST1	15703065	15738313	bone marrow stromal cell antigen 1 [Source:HGNC Symbol;Acc:HGNC:1118]	no	no	no	no
ENSG00000109771	50	100	4	LRP2BP	185363872	185395924	LRP2 binding protein [Source:HGNC Symbol;Acc:HGNC:25434]	no	no	no	no
ENSG00000109805	50	100	4	NCAPG	17810979	17844865	non-SMC condensin I complex subunit G [Source:HGNC Symbol;Acc:HGNC:24304]	no	no	no	no
ENSG00000109846	50	100	11	CRYAB	111908564	111923722	crystallin alpha B [Source:HGNC Symbol;Acc:HGNC:2389]	no	no	no	no
ENSG00000109944	50	100	11	JHY	122882683	122963862	junctional cadherin complex regulator [Source:HGNC Symbol;Acc:HGNC:26288]	no	no	no	no
ENSG00000109956	50	100	11	B3GAT1	134378504	134412242	beta-1,3-glucuronyltransferase 1 [Source:HGNC Symbol;Acc:HGNC:921]	no	no	no	no
ENSG00000110013	50	100	11	SIAE	124633113	124695707	sialic acid acetylesterase [Source:HGNC Symbol;Acc:HGNC:18187]	no	no	no	no
ENSG00000110042	50	100	11	DTX4	59171430	59208588	deltex E3 ubiquitin ligase 4 [Source:HGNC Symbol;Acc:HGNC:29151]	no	no	no	no
ENSG00000110077	50	100	11	MS4A6A	60172015	60184666	membrane spanning 4-domains A6A [Source:HGNC Symbol;Acc:HGNC:13375]	no	no	no	no
ENSG00000110104	50	100	11	CCDC86	60842113	60851081	coiled-coil domain containing 86 [Source:HGNC Symbol;Acc:HGNC:28359]	no	no	no	no
ENSG00000110107	50	100	11	PRPF19	60890547	60906585	pre-mRNA processing factor 19 [Source:HGNC Symbol;Acc:HGNC:17896]	no	no	no	no
ENSG00000110328	50	100	11	GALNT18	11270877	11622005	polypeptide N-acetylgalactosaminyltransferase 18 [Source:HGNC Symbol;Acc:HGNC:30488]	no	no	no	no
ENSG00000110400	50	100	11	NECTIN1	119623408	119729200	nectin cell adhesion molecule 1 [Source:HGNC Symbol;Acc:HGNC:9706]	no	no	no	no
ENSG00000110427	50	100	11	KIAA1549L	33376108	33674102	KIAA1549 like [Source:HGNC Symbol;Acc:HGNC:24836]	no	no	no	no
ENSG00000110446	50	100	11	SLC15A3	60937060	60952653	solute carrier family 15 member 3 [Source:HGNC Symbol;Acc:HGNC:18068]	no	no	no	no
ENSG00000110619	50	100	11	CARS1	3000922	3057613	cysteinyl-tRNA synthetase 1 [Source:HGNC Symbol;Acc:HGNC:1493]	no	no	no	no
ENSG00000110675	50	100	11	ELMOD1	107591091	107666779	ELMO domain containing 1 [Source:HGNC Symbol;Acc:HGNC:25334]	no	no	no	no
ENSG00000110693	50	100	11	SOX6	15966449	16739591	SRY-box transcription factor 6 [Source:HGNC Symbol;Acc:HGNC:16421]	no	no	no	no
ENSG00000110876	50	100	12	SELPLG	108621895	108633894	selectin P ligand [Source:HGNC Symbol;Acc:HGNC:10722]	no	no	no	no
ENSG00000110888	50	100	12	CAPRIN2	30709552	30823302	caprin family member 2 [Source:HGNC Symbol;Acc:HGNC:21259]	no	no	no	no
ENSG00000110958	50	100	12	PTGES3	56663341	56688408	prostaglandin E synthase 3 [Source:HGNC Symbol;Acc:HGNC:16049]	no	no	no	no
ENSG00000110975	50	100	12	SYT10	33374238	33439819	synaptotagmin 10 [Source:HGNC Symbol;Acc:HGNC:19266]	no	no	no	no
ENSG00000110987	50	100	12	BCL7A	122019422	122062044	BAF chromatin remodeling complex subunit BCL7A [Source:HGNC Symbol;Acc:HGNC:1004]	no	no	no	no
ENSG00000111110	50	100	12	PPM1H	62643994	62935150	protein phosphatase, Mg2+/Mn2+ dependent 1H [Source:HGNC Symbol;Acc:HGNC:18583]	no	no	no	no
ENSG00000111206	50	100	12	FOXM1	2857680	2877174	forkhead box M1 [Source:HGNC Symbol;Acc:HGNC:3818]	no	no	no	no
ENSG00000111218	50	100	12	PRMT8	3381349	3593973	protein arginine methyltransferase 8 [Source:HGNC Symbol;Acc:HGNC:5188]	no	no	no	no
ENSG00000111247	50	100	12	RAD51AP1	4538798	4560047	RAD51 associated protein 1 [Source:HGNC Symbol;Acc:HGNC:16956]	no	no	no	no
ENSG00000111261	50	100	12	MANSC1	12326056	12350242	MANSC domain containing 1 [Source:HGNC Symbol;Acc:HGNC:25505]	no	no	no	no
ENSG00000111371	50	100	12	SLC38A1	46183063	46270017	solute carrier family 38 member 1 [Source:HGNC Symbol;Acc:HGNC:13447]	no	no	no	no
ENSG00000111554	50	100	12	MDM1	68272443	68332381	Mdm1 nuclear protein [Source:HGNC Symbol;Acc:HGNC:29917]	no	no	no	no
ENSG00000111665	50	100	12	CDCA3	6844793	6851292	cell division cycle associated 3 [Source:HGNC Symbol;Acc:HGNC:14624]	no	no	no	no
ENSG00000111669	50	100	12	TPI1	6867119	6870948	triosephosphate isomerase 1 [Source:HGNC Symbol;Acc:HGNC:12009]	no	no	no	no
ENSG00000111674	50	100	12	ENO2	6913745	6923698	enolase 2 [Source:HGNC Symbol;Acc:HGNC:3353]	no	no	no	no
ENSG00000111728	50	100	12	ST8SIA1	22063773	22437041	ST8 alpha-N-acetyl-neuraminide alpha-2,8-sialyltransferase 1 [Source:HGNC Symbol;Acc:HGNC:10869]	no	no	no	no
ENSG00000111788	50	100	12	ENSG00000111788	9277235	9313241	DEAD/H (Asp-Glu-Ala-Asp/His) box polypeptide like pseudogene	no	no	no	no
ENSG00000111834	50	100	6	RSPH4A	116616479	116632985	radial spoke head component 4A [Source:HGNC Symbol;Acc:HGNC:21558]	no	no	no	no
ENSG00000111907	50	100	6	TPD52L1	125119049	125264407	TPD52 like 1 [Source:HGNC Symbol;Acc:HGNC:12006]	no	no	no	no
ENSG00000111913	50	100	6	RIPOR2	24804282	25042170	RHO family interacting cell polarization regulator 2 [Source:HGNC Symbol;Acc:HGNC:13872]	no	no	no	no
ENSG00000111981	50	100	6	ULBP1	149963943	149973715	UL16 binding protein 1 [Source:HGNC Symbol;Acc:HGNC:14893]	no	no	no	no
ENSG00000112118	50	100	6	MCM3	52264014	52284881	minichromosome maintenance complex component 3 [Source:HGNC Symbol;Acc:HGNC:6945]	no	no	no	no
ENSG00000112139	50	100	6	MDGA1	37630679	37699306	MAM domain containing glycosylphosphatidylinositol anchor 1 [Source:HGNC Symbol;Acc:HGNC:19267]	no	no	no	no
ENSG00000112149	50	100	6	CD83	14117256	14136918	CD83 molecule [Source:HGNC Symbol;Acc:HGNC:1703]	no	no	no	no
ENSG00000112208	50	100	6	BAG2	57172326	57189833	BAG cochaperone 2 [Source:HGNC Symbol;Acc:HGNC:938]	no	no	no	no
ENSG00000112238	50	100	6	PRDM13	99606774	99615578	PR/SET domain 13 [Source:HGNC Symbol;Acc:HGNC:13998]	no	no	no	no
ENSG00000112276	50	100	6	BVES	105096822	105137157	blood vessel epicardial substance [Source:HGNC Symbol;Acc:HGNC:1152]	no	no	no	no
ENSG00000112312	50	100	6	GMNN	24774931	24786099	geminin DNA replication inhibitor [Source:HGNC Symbol;Acc:HGNC:17493]	no	no	no	no
ENSG00000112378	50	100	6	PERP	138088505	138107419	p53 apoptosis effector related to PMP22 [Source:HGNC Symbol;Acc:HGNC:17637]	no	no	no	no
ENSG00000112379	50	100	6	ARFGEF3	138161939	138344663	ARFGEF family member 3 [Source:HGNC Symbol;Acc:HGNC:21213]	no	no	no	no
ENSG00000112414	50	100	6	ADGRG6	142301854	142446266	adhesion G protein-coupled receptor G6 [Source:HGNC Symbol;Acc:HGNC:13841]	no	no	no	no
ENSG00000112541	50	100	6	PDE10A	165327287	165988117	phosphodiesterase 10A [Source:HGNC Symbol;Acc:HGNC:8772]	no	no	no	no
ENSG00000112562	50	100	6	SMOC2	168441151	168673445	SPARC related modular calcium binding 2 [Source:HGNC Symbol;Acc:HGNC:20323]	no	no	no	no
ENSG00000112715	50	100	6	VEGFA	43770184	43786487	vascular endothelial growth factor A [Source:HGNC Symbol;Acc:HGNC:12680]	no	no	no	no
ENSG00000112742	50	100	6	TTK	80003887	80042527	TTK protein kinase [Source:HGNC Symbol;Acc:HGNC:12401]	no	no	no	no
ENSG00000112759	50	100	6	SLC29A1	44219553	44234142	solute carrier family 29 member 1 (Augustine blood group) [Source:HGNC Symbol;Acc:HGNC:11003]	no	no	no	no
ENSG00000112773	50	100	6	TENT5A	81491439	81752774	terminal nucleotidyltransferase 5A [Source:HGNC Symbol;Acc:HGNC:18345]	no	no	no	no
ENSG00000112852	50	100	5	PCDHB2	141094606	141098703	protocadherin beta 2 [Source:HGNC Symbol;Acc:HGNC:8687]	no	no	no	no
ENSG00000112902	50	100	5	SEMA5A	9035033	9546075	semaphorin 5A [Source:HGNC Symbol;Acc:HGNC:10736]	no	no	no	no
ENSG00000112964	50	100	5	GHR	42423439	42721878	growth hormone receptor [Source:HGNC Symbol;Acc:HGNC:4263]	no	no	no	no
ENSG00000112981	50	100	5	NME5	138115175	138139443	NME/NM23 family member 5 [Source:HGNC Symbol;Acc:HGNC:7853]	no	no	no	no
ENSG00000112984	50	100	5	KIF20A	138178719	138187723	kinesin family member 20A [Source:HGNC Symbol;Acc:HGNC:9787]	no	no	no	no
ENSG00000112992	50	100	5	NNT	43602692	43707405	nicotinamide nucleotide transhydrogenase [Source:HGNC Symbol;Acc:HGNC:7863]	no	no	no	no
ENSG00000113108	50	100	5	APBB3	140558268	140564781	amyloid beta precursor protein binding family B member 3 [Source:HGNC Symbol;Acc:HGNC:20708]	no	no	no	no
ENSG00000113140	50	100	5	SPARC	151661096	151686975	secreted protein acidic and cysteine rich [Source:HGNC Symbol;Acc:HGNC:11219]	no	no	no	no
ENSG00000113205	50	100	5	PCDHB3	141100473	141103827	protocadherin beta 3 [Source:HGNC Symbol;Acc:HGNC:8688]	no	no	no	no
ENSG00000113240	50	100	5	CLK4	178602664	178630615	CDC like kinase 4 [Source:HGNC Symbol;Acc:HGNC:13659]	no	no	no	no
ENSG00000113368	50	100	5	LMNB1	126776623	126837020	lamin B1 [Source:HGNC Symbol;Acc:HGNC:6637]	no	no	no	no
ENSG00000113460	50	100	5	BRIX1	34915677	34925996	biogenesis of ribosomes BRX1 [Source:HGNC Symbol;Acc:HGNC:24170]	no	no	no	no
ENSG00000113532	50	100	5	ST8SIA4	100806933	100903282	ST8 alpha-N-acetyl-neuraminide alpha-2,8-sialyltransferase 4 [Source:HGNC Symbol;Acc:HGNC:10871]	no	no	no	no
ENSG00000113552	50	100	5	GNPDA1	141991749	142013041	glucosamine-6-phosphate deaminase 1 [Source:HGNC Symbol;Acc:HGNC:4417]	no	no	no	no
ENSG00000113569	50	100	5	NUP155	37288137	37371106	nucleoporin 155 [Source:HGNC Symbol;Acc:HGNC:8063]	no	no	no	no
ENSG00000113580	50	100	5	NR3C1	143277931	143435512	nuclear receptor subfamily 3 group C member 1 [Source:HGNC Symbol;Acc:HGNC:7978]	no	no	no	no
ENSG00000113657	50	100	5	DPYSL3	147390808	147510068	dihydropyrimidinase like 3 [Source:HGNC Symbol;Acc:HGNC:3015]	no	no	no	no
ENSG00000113721	50	100	5	PDGFRB	150113839	150155872	platelet derived growth factor receptor beta [Source:HGNC Symbol;Acc:HGNC:8804]	no	no	no	no
ENSG00000113739	50	100	5	STC2	173314723	173328447	stanniocalcin 2 [Source:HGNC Symbol;Acc:HGNC:11374]	no	no	no	no
ENSG00000113810	50	100	3	SMC4	160399274	160434954	structural maintenance of chromosomes 4 [Source:HGNC Symbol;Acc:HGNC:14013]	no	no	no	no
ENSG00000113971	50	100	3	NPHP3	132680609	132722432	nephrocystin 3 [Source:HGNC Symbol;Acc:HGNC:7907]	no	no	no	no
ENSG00000114268	50	100	3	PFKFB4	48517684	48562015	6-phosphofructo-2-kinase/fructose-2,6-biphosphatase 4 [Source:HGNC Symbol;Acc:HGNC:8875]	no	no	no	no
ENSG00000114346	50	100	3	ECT2	172750682	172821474	epithelial cell transforming 2 [Source:HGNC Symbol;Acc:HGNC:3155]	no	no	no	no
ENSG00000114374	50	100	Y	USP9Y	12537650	12860839	ubiquitin specific peptidase 9 Y-linked [Source:HGNC Symbol;Acc:HGNC:12633]	no	no	no	no
ENSG00000114626	50	100	3	ABTB1	127672935	127680926	ankyrin repeat and BTB domain containing 1 [Source:HGNC Symbol;Acc:HGNC:18275]	no	no	no	no
ENSG00000114841	50	100	3	DNAH1	52316319	52400492	dynein axonemal heavy chain 1 [Source:HGNC Symbol;Acc:HGNC:2940]	no	no	no	no
ENSG00000114861	50	100	3	FOXP1	70954693	71583978	forkhead box P1 [Source:HGNC Symbol;Acc:HGNC:3823]	no	no	no	no
ENSG00000114923	50	100	2	SLC4A3	219627394	219641980	solute carrier family 4 member 3 [Source:HGNC Symbol;Acc:HGNC:11029]	no	no	no	no
ENSG00000115008	50	100	2	IL1A	112773925	112784493	interleukin 1 alpha [Source:HGNC Symbol;Acc:HGNC:5991]	no	no	no	no
ENSG00000115107	50	100	2	STEAP3	119223831	119265652	STEAP3 metalloreductase [Source:HGNC Symbol;Acc:HGNC:24592]	no	no	no	no
ENSG00000115163	50	100	2	CENPA	26764289	26801067	centromere protein A [Source:HGNC Symbol;Acc:HGNC:1851]	no	no	no	no
ENSG00000115414	50	100	2	FN1	215360440	215436073	fibronectin 1 [Source:HGNC Symbol;Acc:HGNC:3778]	no	no	no	no
ENSG00000115423	50	100	2	DNAH6	84516455	84819589	dynein axonemal heavy chain 6 [Source:HGNC Symbol;Acc:HGNC:2951]	no	no	no	no
ENSG00000115525	50	100	2	ST3GAL5	85837120	85905199	ST3 beta-galactoside alpha-2,3-sialyltransferase 5 [Source:HGNC Symbol;Acc:HGNC:10872]	no	no	no	no
ENSG00000115541	50	100	2	HSPE1	197500140	197503449	heat shock protein family E (Hsp10) member 1 [Source:HGNC Symbol;Acc:HGNC:5269]	no	no	no	no
ENSG00000115594	50	100	2	IL1R1	102064544	102179874	interleukin 1 receptor type 1 [Source:HGNC Symbol;Acc:HGNC:5993]	no	no	no	no
ENSG00000115604	50	100	2	IL18R1	102311529	102398777	interleukin 18 receptor 1 [Source:HGNC Symbol;Acc:HGNC:5988]	no	no	no	no
ENSG00000115705	50	100	2	TPO	1374066	1543711	thyroid peroxidase [Source:HGNC Symbol;Acc:HGNC:12015]	no	no	no	no
ENSG00000115884	50	100	2	SDC1	20200797	20225433	syndecan 1 [Source:HGNC Symbol;Acc:HGNC:10658]	no	no	no	no
ENSG00000115935	50	100	2	WIPF1	174559572	174682916	WAS/WASL interacting protein family member 1 [Source:HGNC Symbol;Acc:HGNC:12736]	no	no	no	no
ENSG00000115977	50	100	2	AAK1	69457997	69674349	AP2 associated kinase 1 [Source:HGNC Symbol;Acc:HGNC:19679]	no	no	no	no
ENSG00000116017	50	100	19	ARID3A	925781	975939	AT-rich interaction domain 3A [Source:HGNC Symbol;Acc:HGNC:3031]	no	no	no	no
ENSG00000116161	50	100	1	CACYBP	174999163	175012027	calcyclin binding protein [Source:HGNC Symbol;Acc:HGNC:30423]	no	no	no	no
ENSG00000116285	50	100	1	ERRFI1	8004404	8026309	ERBB receptor feedback inhibitor 1 [Source:HGNC Symbol;Acc:HGNC:18185]	no	no	no	no
ENSG00000116329	50	100	1	OPRD1	28812170	28871267	opioid receptor delta 1 [Source:HGNC Symbol;Acc:HGNC:8153]	no	no	no	no
ENSG00000116525	50	100	1	TRIM62	33145399	33182059	tripartite motif containing 62 [Source:HGNC Symbol;Acc:HGNC:25574]	no	no	no	no
ENSG00000116661	50	100	1	FBXO2	11637018	11655785	F-box protein 2 [Source:HGNC Symbol;Acc:HGNC:13581]	no	no	no	no
ENSG00000116729	50	100	1	WLS	68098473	68233120	Wnt ligand secretion mediator [Source:HGNC Symbol;Acc:HGNC:30238]	no	no	no	no
ENSG00000116741	50	100	1	RGS2	192809039	192812275	regulator of G protein signaling 2 [Source:HGNC Symbol;Acc:HGNC:9998]	no	no	no	no
ENSG00000116750	50	100	1	UCHL5	193012250	193060080	ubiquitin C-terminal hydrolase L5 [Source:HGNC Symbol;Acc:HGNC:19678]	no	no	no	no
ENSG00000116761	50	100	1	CTH	70411218	70439851	cystathionine gamma-lyase [Source:HGNC Symbol;Acc:HGNC:2501]	no	no	no	no
ENSG00000116830	50	100	1	TTF2	117060326	117107453	transcription termination factor 2 [Source:HGNC Symbol;Acc:HGNC:12398]	no	no	no	no
ENSG00000116874	50	100	1	WARS2	119031216	119140654	tryptophanyl tRNA synthetase 2, mitochondrial [Source:HGNC Symbol;Acc:HGNC:12730]	no	no	no	no
ENSG00000116983	50	100	1	HPCAL4	39678648	39691485	hippocalcin like 4 [Source:HGNC Symbol;Acc:HGNC:18212]	no	no	no	no
ENSG00000116984	50	100	1	MTR	236795260	236921278	5-methyltetrahydrofolate-homocysteine methyltransferase [Source:HGNC Symbol;Acc:HGNC:7468]	no	no	no	no
ENSG00000116990	50	100	1	MYCL	39895426	39902256	MYCL proto-oncogene, bHLH transcription factor [Source:HGNC Symbol;Acc:HGNC:7555]	no	no	no	no
ENSG00000117013	50	100	1	KCNQ4	40783787	40840452	potassium voltage-gated channel subfamily Q member 4 [Source:HGNC Symbol;Acc:HGNC:6298]	no	no	no	no
ENSG00000117016	50	100	1	RIMS3	40620680	40665682	regulating synaptic membrane exocytosis 3 [Source:HGNC Symbol;Acc:HGNC:21292]	no	no	no	no
ENSG00000117152	50	100	1	RGS4	163068775	163076802	regulator of G protein signaling 4 [Source:HGNC Symbol;Acc:HGNC:10000]	no	no	no	no
ENSG00000117228	50	100	1	GBP1	89051882	89065360	guanylate binding protein 1 [Source:HGNC Symbol;Acc:HGNC:4182]	no	no	no	no
ENSG00000117242	50	100	1	PINK1-AS	20642657	20652193	PINK1 antisense RNA [Source:HGNC Symbol;Acc:HGNC:38872]	no	no	no	no
ENSG00000117266	50	100	1	CDK18	205504596	205532793	cyclin dependent kinase 18 [Source:HGNC Symbol;Acc:HGNC:8751]	no	no	no	no
ENSG00000117394	50	100	1	SLC2A1	42925353	42958893	solute carrier family 2 member 1 [Source:HGNC Symbol;Acc:HGNC:11005]	no	no	no	no
ENSG00000117399	50	100	1	CDC20	43358981	43363203	cell division cycle 20 [Source:HGNC Symbol;Acc:HGNC:1723]	no	no	no	no
ENSG00000117411	50	100	1	B4GALT2	43978943	43991170	beta-1,4-galactosyltransferase 2 [Source:HGNC Symbol;Acc:HGNC:925]	no	no	no	no
ENSG00000117480	50	100	1	FAAH	46394317	46413848	fatty acid amide hydrolase [Source:HGNC Symbol;Acc:HGNC:3553]	no	no	no	no
ENSG00000117616	50	100	1	RSRP1	25242249	25338213	arginine and serine rich protein 1 [Source:HGNC Symbol;Acc:HGNC:25234]	no	no	no	no
ENSG00000117650	50	100	1	NEK2	211658657	211675630	NIMA related kinase 2 [Source:HGNC Symbol;Acc:HGNC:7745]	no	no	no	no
ENSG00000117791	50	100	1	MTARC2	220748225	220784815	mitochondrial amidoxime reducing component 2 [Source:HGNC Symbol;Acc:HGNC:26064]	no	no	no	no
ENSG00000117877	50	100	19	POLR1G	45406644	45410737	RNA polymerase I subunit G [Source:HGNC Symbol;Acc:HGNC:24219]	no	no	no	no
ENSG00000117971	50	100	15	CHRNB4	78624111	78727754	cholinergic receptor nicotinic beta 4 subunit [Source:HGNC Symbol;Acc:HGNC:1964]	no	no	no	no
ENSG00000118193	50	100	1	KIF14	200551497	200620751	kinesin family member 14 [Source:HGNC Symbol;Acc:HGNC:19181]	no	no	no	no
ENSG00000118271	50	100	18	TTR	31557009	31598833	transthyretin [Source:HGNC Symbol;Acc:HGNC:12405]	no	no	no	no
ENSG00000118473	50	100	1	SGIP1	66533267	66751139	SH3GL interacting endocytic adaptor 1 [Source:HGNC Symbol;Acc:HGNC:25412]	no	no	no	no
ENSG00000118640	50	100	2	VAMP8	85561562	85582031	vesicle associated membrane protein 8 [Source:HGNC Symbol;Acc:HGNC:12647]	no	no	no	no
ENSG00000118777	50	100	4	ABCG2	88090150	88231628	ATP binding cassette subfamily G member 2 (Junior blood group) [Source:HGNC Symbol;Acc:HGNC:74]	no	no	no	no
ENSG00000118785	50	100	4	SPP1	87975667	87983532	secreted phosphoprotein 1 [Source:HGNC Symbol;Acc:HGNC:11255]	no	no	no	no
ENSG00000118855	50	100	3	MFSD1	158732198	158829719	major facilitator superfamily domain containing 1 [Source:HGNC Symbol;Acc:HGNC:25874]	no	no	no	no
ENSG00000118898	50	100	16	PPL	4882507	4960741	periplakin [Source:HGNC Symbol;Acc:HGNC:9273]	no	no	no	no
ENSG00000118922	50	100	13	KLF12	73686089	74134404	KLF transcription factor 12 [Source:HGNC Symbol;Acc:HGNC:6346]	no	no	no	no
ENSG00000118997	50	100	2	DNAH7	195737703	196068837	dynein axonemal heavy chain 7 [Source:HGNC Symbol;Acc:HGNC:18661]	no	no	no	no
ENSG00000119138	50	100	9	KLF9	70384604	70414657	KLF transcription factor 9 [Source:HGNC Symbol;Acc:HGNC:1123]	no	no	no	no
ENSG00000119147	50	100	2	ECRG4	106063246	106078155	ECRG4 augurin precursor [Source:HGNC Symbol;Acc:HGNC:24642]	no	no	no	no
ENSG00000119403	50	100	9	PHF19	120855651	120894896	PHD finger protein 19 [Source:HGNC Symbol;Acc:HGNC:24566]	no	no	no	no
ENSG00000119547	50	100	18	ONECUT2	57435374	57491298	one cut homeobox 2 [Source:HGNC Symbol;Acc:HGNC:8139]	no	no	no	no
ENSG00000119630	50	100	14	PGF	74941834	74955626	placental growth factor [Source:HGNC Symbol;Acc:HGNC:8893]	no	no	no	no
ENSG00000119636	50	100	14	BBOF1	74019349	74082863	basal body orientation factor 1 [Source:HGNC Symbol;Acc:HGNC:19855]	no	no	no	no
ENSG00000119699	50	100	14	TGFB3	75958097	75983011	transforming growth factor beta 3 [Source:HGNC Symbol;Acc:HGNC:11769]	no	no	no	no
ENSG00000119723	50	100	14	COQ6	73949926	73963670	coenzyme Q6, monooxygenase [Source:HGNC Symbol;Acc:HGNC:20233]	no	no	no	no
ENSG00000119866	50	100	2	BCL11A	60450520	60554467	BAF chromatin remodeling complex subunit BCL11A [Source:HGNC Symbol;Acc:HGNC:13221]	no	no	no	no
ENSG00000119917	50	100	10	IFIT3	89327307	89377473	interferon induced protein with tetratricopeptide repeats 3 [Source:HGNC Symbol;Acc:HGNC:5411]	no	no	no	no
ENSG00000119922	50	100	10	IFIT2	89283694	89309271	interferon induced protein with tetratricopeptide repeats 2 [Source:HGNC Symbol;Acc:HGNC:5409]	no	no	no	no
ENSG00000119938	50	100	10	PPP1R3C	91628442	91633071	protein phosphatase 1 regulatory subunit 3C [Source:HGNC Symbol;Acc:HGNC:9293]	no	no	no	no
ENSG00000120053	50	100	10	GOT1	99396870	99430624	glutamic-oxaloacetic transaminase 1 [Source:HGNC Symbol;Acc:HGNC:4432]	no	no	no	no
ENSG00000120149	50	100	5	MSX2	174724582	174730896	msh homeobox 2 [Source:HGNC Symbol;Acc:HGNC:7392]	no	no	no	no
ENSG00000120215	50	100	9	MLANA	5890889	5910606	melan-A [Source:HGNC Symbol;Acc:HGNC:7124]	no	no	no	no
ENSG00000120251	50	100	4	GRIA2	157204182	157387146	glutamate ionotropic receptor AMPA type subunit 2 [Source:HGNC Symbol;Acc:HGNC:4572]	no	no	no	no
ENSG00000120254	50	100	6	MTHFD1L	150865679	151101887	methylenetetrahydrofolate dehydrogenase (NADP+ dependent) 1 like [Source:HGNC Symbol;Acc:HGNC:21055]	no	no	no	no
ENSG00000120324	50	100	5	PCDHB10	141192353	141195647	protocadherin beta 10 [Source:HGNC Symbol;Acc:HGNC:8681]	no	no	no	no
ENSG00000120327	50	100	5	PCDHB14	141223343	141227759	protocadherin beta 14 [Source:HGNC Symbol;Acc:HGNC:8685]	no	no	no	no
ENSG00000120437	50	100	6	ACAT2	159762045	159779112	acetyl-CoA acetyltransferase 2 [Source:HGNC Symbol;Acc:HGNC:94]	no	no	no	no
ENSG00000120539	50	100	10	MASTL	27154824	27187953	microtubule associated serine/threonine kinase like [Source:HGNC Symbol;Acc:HGNC:19042]	no	no	no	no
ENSG00000120594	50	100	10	PLXDC2	19816239	20289856	plexin domain containing 2 [Source:HGNC Symbol;Acc:HGNC:21013]	no	no	no	no
ENSG00000120693	50	100	13	SMAD9	36844831	36920765	SMAD family member 9 [Source:HGNC Symbol;Acc:HGNC:6774]	no	no	no	no
ENSG00000120738	50	100	5	EGR1	138465479	138469303	early growth response 1 [Source:HGNC Symbol;Acc:HGNC:3238]	no	no	no	no
ENSG00000120756	50	100	3	PLS1	142596393	142713664	plastin 1 [Source:HGNC Symbol;Acc:HGNC:9090]	no	no	no	no
ENSG00000120832	50	100	12	MTERF2	106977277	106987160	mitochondrial transcription termination factor 2 [Source:HGNC Symbol;Acc:HGNC:30779]	no	no	no	no
ENSG00000120875	50	100	8	DUSP4	29333064	29350684	dual specificity phosphatase 4 [Source:HGNC Symbol;Acc:HGNC:3070]	no	no	no	no
ENSG00000120915	50	100	8	EPHX2	27490781	27545564	epoxide hydrolase 2 [Source:HGNC Symbol;Acc:HGNC:3402]	no	no	no	no
ENSG00000121039	50	100	8	RDH10	73294602	73325281	retinol dehydrogenase 10 [Source:HGNC Symbol;Acc:HGNC:19975]	no	no	no	no
ENSG00000121057	50	100	17	AKAP1	57085092	57121346	A-kinase anchoring protein 1 [Source:HGNC Symbol;Acc:HGNC:367]	no	no	no	no
ENSG00000121104	50	100	17	FAM117A	49710332	49789180	family with sequence similarity 117 member A [Source:HGNC Symbol;Acc:HGNC:24179]	no	no	no	no
ENSG00000121152	50	100	2	NCAPH	96335766	96377091	non-SMC condensin I complex subunit H [Source:HGNC Symbol;Acc:HGNC:1112]	no	no	no	no
ENSG00000121316	50	100	12	PLBD1	14503661	14567883	phospholipase B domain containing 1 [Source:HGNC Symbol;Acc:HGNC:26215]	no	no	no	no
ENSG00000121579	50	100	3	NAA50	113716458	113746300	N-alpha-acetyltransferase 50, NatE catalytic subunit [Source:HGNC Symbol;Acc:HGNC:29533]	no	no	no	no
ENSG00000121904	50	100	1	CSMD2	33513998	34165842	CUB and Sushi multiple domains 2 [Source:HGNC Symbol;Acc:HGNC:19290]	no	no	no	no
ENSG00000121905	50	100	1	HPCA	32885994	32898441	hippocalcin [Source:HGNC Symbol;Acc:HGNC:5144]	no	no	no	no
ENSG00000121966	50	100	2	CXCR4	136114349	136119177	C-X-C motif chemokine receptor 4 [Source:HGNC Symbol;Acc:HGNC:2561]	no	no	no	no
ENSG00000122477	50	100	1	LRRC39	100148448	100178273	leucine rich repeat containing 39 [Source:HGNC Symbol;Acc:HGNC:28228]	no	no	no	no
ENSG00000122481	50	100	1	RWDD3	95234210	95247225	RWD domain containing 3 [Source:HGNC Symbol;Acc:HGNC:21393]	no	no	no	no
ENSG00000122641	50	100	7	INHBA	41667168	41705834	inhibin subunit beta A [Source:HGNC Symbol;Acc:HGNC:6066]	no	no	no	no
ENSG00000122644	50	100	7	ARL4A	12686856	12690958	ADP ribosylation factor like GTPase 4A [Source:HGNC Symbol;Acc:HGNC:695]	no	no	no	no
ENSG00000122691	50	100	7	TWIST1	19020991	19117636	twist family bHLH transcription factor 1 [Source:HGNC Symbol;Acc:HGNC:12428]	no	no	no	no
ENSG00000122735	50	100	9	DNAI1	34457414	34520988	dynein axonemal intermediate chain 1 [Source:HGNC Symbol;Acc:HGNC:2954]	no	no	no	no
ENSG00000122779	50	100	7	TRIM24	138460259	138589996	tripartite motif containing 24 [Source:HGNC Symbol;Acc:HGNC:11812]	no	no	no	no
ENSG00000122952	50	100	10	ZWINT	56357227	56361273	ZW10 interacting kinetochore protein [Source:HGNC Symbol;Acc:HGNC:13195]	no	no	no	no
ENSG00000122966	50	100	12	CIT	119685791	119877320	citron rho-interacting serine/threonine kinase [Source:HGNC Symbol;Acc:HGNC:1985]	no	no	no	no
ENSG00000123095	50	100	12	BHLHE41	26120030	26125037	basic helix-loop-helix family member e41 [Source:HGNC Symbol;Acc:HGNC:16617]	no	no	no	no
ENSG00000123240	50	100	10	OPTN	13099449	13138308	optineurin [Source:HGNC Symbol;Acc:HGNC:17142]	no	no	no	no
ENSG00000123358	50	100	12	NR4A1	52022832	52059507	nuclear receptor subfamily 4 group A member 1 [Source:HGNC Symbol;Acc:HGNC:7980]	no	no	no	no
ENSG00000123360	50	100	12	PDE1B	54549601	54579239	phosphodiesterase 1B [Source:HGNC Symbol;Acc:HGNC:8775]	no	no	no	no
ENSG00000123416	50	100	12	TUBA1B	49127782	49131397	tubulin alpha 1b [Source:HGNC Symbol;Acc:HGNC:18809]	no	no	no	no
ENSG00000123473	50	100	1	STIL	47250139	47314892	STIL centriolar assembly protein [Source:HGNC Symbol;Acc:HGNC:10879]	no	no	no	no
ENSG00000123485	50	100	2	HJURP	233833416	233854566	Holliday junction recognition protein [Source:HGNC Symbol;Acc:HGNC:25444]	no	no	no	no
ENSG00000123570	50	100	X	RAB9B	103822327	103832257	RAB9B, member RAS oncogene family [Source:HGNC Symbol;Acc:HGNC:14090]	no	no	no	yes
ENSG00000123612	50	100	2	ACVR1C	157526767	157628864	activin A receptor type 1C [Source:HGNC Symbol;Acc:HGNC:18123]	no	no	no	no
ENSG00000123684	50	100	1	LPGAT1	211743457	211830763	lysophosphatidylglycerol acyltransferase 1 [Source:HGNC Symbol;Acc:HGNC:28985]	no	no	no	no
ENSG00000123739	50	100	4	PLA2G12A	109709989	109730070	phospholipase A2 group XIIA [Source:HGNC Symbol;Acc:HGNC:18554]	no	no	no	no
ENSG00000123836	50	100	1	PFKFB2	207034366	207081024	6-phosphofructo-2-kinase/fructose-2,6-biphosphatase 2 [Source:HGNC Symbol;Acc:HGNC:8873]	no	no	no	no
ENSG00000123975	50	100	9	CKS2	89311195	89316703	CDC28 protein kinase regulatory subunit 2 [Source:HGNC Symbol;Acc:HGNC:2000]	no	no	no	no
ENSG00000123989	50	100	2	CHPF	219538954	219543809	chondroitin polymerizing factor [Source:HGNC Symbol;Acc:HGNC:24291]	no	no	no	no
ENSG00000124067	50	100	16	SLC12A4	67943474	67969601	solute carrier family 12 member 4 [Source:HGNC Symbol;Acc:HGNC:10913]	no	no	no	no
ENSG00000124126	50	100	20	PREX1	48624252	48827999	phosphatidylinositol-3,4,5-trisphosphate dependent Rac exchange factor 1 [Source:HGNC Symbol;Acc:HGNC:32594]	no	no	no	no
ENSG00000124207	50	100	20	CSE1L	49046246	49096960	chromosome segregation 1 like [Source:HGNC Symbol;Acc:HGNC:2431]	no	no	no	no
ENSG00000124313	50	100	X	IQSEC2	53225828	53321350	IQ motif and Sec7 domain ArfGEF 2 [Source:HGNC Symbol;Acc:HGNC:29059]	no	yes	no	no
ENSG00000124357	50	100	2	NAGK	71064344	71079808	N-acetylglucosamine kinase [Source:HGNC Symbol;Acc:HGNC:17174]	no	no	no	no
ENSG00000124374	50	100	2	PAIP2B	71182738	71227103	poly(A) binding protein interacting protein 2B [Source:HGNC Symbol;Acc:HGNC:29200]	no	no	no	no
ENSG00000124491	50	100	6	F13A1	6144084	6321013	coagulation factor XIII A chain [Source:HGNC Symbol;Acc:HGNC:3531]	no	no	no	no
ENSG00000124570	50	100	6	SERPINB6	2948159	2972165	serpin family B member 6 [Source:HGNC Symbol;Acc:HGNC:8950]	no	no	no	no
ENSG00000124785	50	100	6	NRN1	5997999	6007605	neuritin 1 [Source:HGNC Symbol;Acc:HGNC:17972]	no	no	no	no
ENSG00000124788	50	100	6	ATXN1	16299112	16761491	ataxin 1 [Source:HGNC Symbol;Acc:HGNC:10548]	no	no	no	no
ENSG00000124942	50	100	11	AHNAK	62433542	62556235	AHNAK nucleoprotein [Source:HGNC Symbol;Acc:HGNC:347]	no	no	no	no
ENSG00000125046	50	100	3	SSUH2	8619386	8745040	ssu-2 homolog [Source:HGNC Symbol;Acc:HGNC:24809]	no	no	no	no
ENSG00000125148	50	100	16	MT2A	56608584	56609497	metallothionein 2A [Source:HGNC Symbol;Acc:HGNC:7406]	no	no	no	no
ENSG00000125266	50	100	13	EFNB2	106489745	106535662	ephrin B2 [Source:HGNC Symbol;Acc:HGNC:3227]	no	no	no	no
ENSG00000125285	50	100	13	SOX21	94709622	94712545	SRY-box transcription factor 21 [Source:HGNC Symbol;Acc:HGNC:11197]	no	no	no	no
ENSG00000125430	50	100	17	HS3ST3B1	14301081	14349404	heparan sulfate-glucosamine 3-sulfotransferase 3B1 [Source:HGNC Symbol;Acc:HGNC:5198]	no	no	no	no
ENSG00000125775	50	100	20	SDCBP2	1309909	1329139	syndecan binding protein 2 [Source:HGNC Symbol;Acc:HGNC:15756]	no	no	no	no
ENSG00000125835	50	100	20	SNRPB	2461634	2470853	small nuclear ribonucleoprotein polypeptides B and B1 [Source:HGNC Symbol;Acc:HGNC:11153]	no	no	no	no
ENSG00000125851	50	100	20	PCSK2	17226107	17484578	proprotein convertase subtilisin/kexin type 2 [Source:HGNC Symbol;Acc:HGNC:8744]	no	no	no	no
ENSG00000125869	50	100	20	LAMP5	9514358	9530524	lysosomal associated membrane protein family member 5 [Source:HGNC Symbol;Acc:HGNC:16097]	no	no	no	no
ENSG00000125878	50	100	20	TCF15	604257	610309	transcription factor 15 [Source:HGNC Symbol;Acc:HGNC:11627]	no	no	no	no
ENSG00000125885	50	100	20	MCM8	5950652	5998977	minichromosome maintenance 8 homologous recombination repair factor [Source:HGNC Symbol;Acc:HGNC:16147]	no	no	no	no
ENSG00000125895	50	100	20	TMEM74B	1180561	1185415	transmembrane protein 74B [Source:HGNC Symbol;Acc:HGNC:15893]	no	no	no	no
ENSG00000125898	50	100	20	FAM110A	833715	857463	family with sequence similarity 110 member A [Source:HGNC Symbol;Acc:HGNC:16188]	no	no	no	no
ENSG00000125965	50	100	20	GDF5	35433347	35454746	growth differentiation factor 5 [Source:HGNC Symbol;Acc:HGNC:4220]	no	no	no	no
ENSG00000125966	50	100	20	MMP24	35226690	35276998	matrix metallopeptidase 24 [Source:HGNC Symbol;Acc:HGNC:7172]	no	no	no	no
ENSG00000125968	50	100	20	ID1	31605283	31606515	inhibitor of DNA binding 1 [Source:HGNC Symbol;Acc:HGNC:5360]	no	no	no	no
ENSG00000126453	50	100	19	BCL2L12	49665142	49673916	BCL2 like 12 [Source:HGNC Symbol;Acc:HGNC:13787]	no	no	no	no
ENSG00000126749	50	100	12	EMG1	6970913	6979936	EMG1 N1-specific pseudouridine methyltransferase [Source:HGNC Symbol;Acc:HGNC:16912]	no	no	no	no
ENSG00000126787	50	100	14	DLGAP5	55148112	55191608	DLG associated protein 5 [Source:HGNC Symbol;Acc:HGNC:16864]	no	no	no	no
ENSG00000126790	50	100	14	L3HYPDH	59460363	59484408	trans-L-3-hydroxyproline dehydratase [Source:HGNC Symbol;Acc:HGNC:20488]	no	no	no	no
ENSG00000126803	50	100	14	HSPA2	64535905	64546173	heat shock protein family A (Hsp70) member 2 [Source:HGNC Symbol;Acc:HGNC:5235]	no	no	no	no
ENSG00000126822	50	100	14	PLEKHG3	64704102	64750249	pleckstrin homology and RhoGEF domain containing G3 [Source:HGNC Symbol;Acc:HGNC:20364]	no	no	no	no
ENSG00000126953	50	100	X	TIMM8A	101345661	101348742	translocase of inner mitochondrial membrane 8A [Source:HGNC Symbol;Acc:HGNC:11817]	no	no	no	yes
ENSG00000127191	50	100	9	TRAF2	136881912	136926607	TNF receptor associated factor 2 [Source:HGNC Symbol;Acc:HGNC:12032]	no	no	no	no
ENSG00000127364	50	100	7	TAS2R4	141776674	141781691	taste 2 receptor member 4 [Source:HGNC Symbol;Acc:HGNC:14911]	no	no	no	no
ENSG00000127399	50	100	7	LRRC61	150323263	150338156	leucine rich repeat containing 61 [Source:HGNC Symbol;Acc:HGNC:21704]	no	no	no	no
ENSG00000127418	50	100	4	FGFRL1	1009936	1026898	fibroblast growth factor receptor like 1 [Source:HGNC Symbol;Acc:HGNC:3693]	no	no	no	no
ENSG00000127423	50	100	1	AUNIP	25831913	25859458	aurora kinase A and ninein interacting protein [Source:HGNC Symbol;Acc:HGNC:28363]	no	no	no	no
ENSG00000127564	50	100	16	PKMYT1	2968024	2980479	protein kinase, membrane associated tyrosine/threonine 1 [Source:HGNC Symbol;Acc:HGNC:29650]	no	no	no	no
ENSG00000127720	50	100	12	METTL25	82358528	82479239	methyltransferase like 25 [Source:HGNC Symbol;Acc:HGNC:26228]	no	no	no	no
ENSG00000127914	50	100	7	AKAP9	91940840	92110673	A-kinase anchoring protein 9 [Source:HGNC Symbol;Acc:HGNC:379]	no	no	no	no
ENSG00000128011	50	100	19	LRFN1	39306566	39320863	leucine rich repeat and fibronectin type III domain containing 1 [Source:HGNC Symbol;Acc:HGNC:29290]	no	no	no	no
ENSG00000128059	50	100	4	PPAT	56393362	56435615	phosphoribosyl pyrophosphate amidotransferase [Source:HGNC Symbol;Acc:HGNC:9238]	no	no	no	no
ENSG00000128165	50	100	22	ADM2	50481543	50486440	adrenomedullin 2 [Source:HGNC Symbol;Acc:HGNC:28898]	no	no	no	no
ENSG00000128228	50	100	22	SDF2L1	21642302	21644299	stromal cell derived factor 2 like 1 [Source:HGNC Symbol;Acc:HGNC:10676]	no	no	no	no
ENSG00000128245	50	100	22	YWHAH	31944522	31957603	tyrosine 3-monooxygenase/tryptophan 5-monooxygenase activation protein eta [Source:HGNC Symbol;Acc:HGNC:12853]	no	no	no	no
ENSG00000128254	50	100	22	YWHAH-AS1	31925519	31945518	YWHAH antisense RNA 1 [Source:HGNC Symbol;Acc:HGNC:23051]	no	no	no	no
ENSG00000128309	50	100	22	MPST	37019635	37029821	mercaptopyruvate sulfurtransferase [Source:HGNC Symbol;Acc:HGNC:7223]	no	no	no	no
ENSG00000128510	50	100	7	CPA4	130293134	130324180	carboxypeptidase A4 [Source:HGNC Symbol;Acc:HGNC:15740]	no	no	no	no
ENSG00000128564	50	100	7	VGF	101162509	101165569	VGF nerve growth factor inducible [Source:HGNC Symbol;Acc:HGNC:12684]	no	no	no	no
ENSG00000128567	50	100	7	PODXL	131500262	131558217	podocalyxin like [Source:HGNC Symbol;Acc:HGNC:9171]	no	no	no	no
ENSG00000128573	50	100	7	FOXP2	114086327	114693772	forkhead box P2 [Source:HGNC Symbol;Acc:HGNC:13875]	no	no	no	no
ENSG00000128594	50	100	7	LRRC4	128027071	128032107	leucine rich repeat containing 4 [Source:HGNC Symbol;Acc:HGNC:15586]	no	no	no	no
ENSG00000128606	50	100	7	LRRC17	102913000	102945111	leucine rich repeat containing 17 [Source:HGNC Symbol;Acc:HGNC:16895]	no	no	no	no
ENSG00000128655	50	100	2	PDE11A	177623244	178108339	phosphodiesterase 11A [Source:HGNC Symbol;Acc:HGNC:8773]	no	no	no	no
ENSG00000128805	50	100	10	ARHGAP22	48446036	48656265	Rho GTPase activating protein 22 [Source:HGNC Symbol;Acc:HGNC:30320]	no	no	no	no
ENSG00000128944	50	100	15	KNSTRN	40382721	40394288	kinetochore localized astrin (SPAG5) binding protein [Source:HGNC Symbol;Acc:HGNC:30767]	no	no	no	no
ENSG00000128965	50	100	15	CHAC1	40952962	40956512	ChaC glutathione specific gamma-glutamylcyclotransferase 1 [Source:HGNC Symbol;Acc:HGNC:28680]	no	no	no	no
ENSG00000129007	50	100	15	CALML4	68190705	68206079	calmodulin like 4 [Source:HGNC Symbol;Acc:HGNC:18445]	no	no	no	no
ENSG00000129028	50	100	15	THAP10	70881342	70892433	THAP domain containing 10 [Source:HGNC Symbol;Acc:HGNC:23193]	no	no	no	no
ENSG00000129151	50	100	11	BBOX1	27040725	27127809	gamma-butyrobetaine hydroxylase 1 [Source:HGNC Symbol;Acc:HGNC:964]	no	no	no	no
ENSG00000129195	50	100	17	PIMREG	6444441	6451469	PICALM interacting mitotic regulator [Source:HGNC Symbol;Acc:HGNC:25483]	no	no	no	no
ENSG00000129204	50	100	17	USP6	5116032	5175034	ubiquitin specific peptidase 6 [Source:HGNC Symbol;Acc:HGNC:12629]	no	no	no	no
ENSG00000129295	50	100	8	DNAAF11	132570416	132675592	dynein axonemal assembly factor 11 [Source:HGNC Symbol;Acc:HGNC:16725]	no	no	no	no
ENSG00000129422	50	100	8	MTUS1	17643795	17801094	microtubule associated scaffold protein 1 [Source:HGNC Symbol;Acc:HGNC:29789]	no	no	no	no
ENSG00000129595	50	100	5	EPB41L4A	112142441	112419313	erythrocyte membrane protein band 4.1 like 4A [Source:HGNC Symbol;Acc:HGNC:13278]	no	no	no	no
ENSG00000129810	50	100	3	SGO1	20160593	20186206	shugoshin 1 [Source:HGNC Symbol;Acc:HGNC:25088]	no	no	no	no
ENSG00000129824	50	100	Y	RPS4Y1	2841602	2932000	ribosomal protein S4 Y-linked 1 [Source:HGNC Symbol;Acc:HGNC:10425]	no	no	no	no
ENSG00000130005	50	100	19	GAMT	1397026	1401570	guanidinoacetate N-methyltransferase [Source:HGNC Symbol;Acc:HGNC:4136]	no	no	no	no
ENSG00000130038	50	100	12	CRACR2A	3606633	3764819	calcium release activated channel regulator 2A [Source:HGNC Symbol;Acc:HGNC:28657]	no	no	no	no
ENSG00000130054	50	100	X	NALF2	69504326	69532508	NALCN channel auxiliary factor 2 [Source:HGNC Symbol;Acc:HGNC:30701]	no	no	no	no
ENSG00000130193	50	100	8	THEM6	142727223	142736927	thioesterase superfamily member 6 [Source:HGNC Symbol;Acc:HGNC:29656]	no	no	no	no
ENSG00000130222	50	100	9	GADD45G	89605012	89606555	growth arrest and DNA damage inducible gamma [Source:HGNC Symbol;Acc:HGNC:4097]	no	no	no	no
ENSG00000130332	50	100	19	LSM7	2321520	2328611	LSM7 homolog, U6 small nuclear RNA and mRNA degradation associated [Source:HGNC Symbol;Acc:HGNC:20470]	no	no	no	no
ENSG00000130347	50	100	6	RTN4IP1	106570771	106629498	reticulon 4 interacting protein 1 [Source:HGNC Symbol;Acc:HGNC:18647]	no	no	no	no
ENSG00000130363	50	100	6	RSPH3	158972871	159000202	radial spoke head 3 [Source:HGNC Symbol;Acc:HGNC:21054]	no	no	no	no
ENSG00000130413	50	100	11	STK33	8391868	8594289	serine/threonine kinase 33 [Source:HGNC Symbol;Acc:HGNC:14568]	no	no	no	no
ENSG00000130477	50	100	19	UNC13A	17601336	17688365	unc-13 homolog A [Source:HGNC Symbol;Acc:HGNC:23150]	no	no	no	no
ENSG00000130517	50	100	19	PGPEP1	18340598	18369950	pyroglutamyl-peptidase I [Source:HGNC Symbol;Acc:HGNC:13568]	no	no	no	no
ENSG00000130518	50	100	19	IQCN	18257098	18274500	IQ motif containing N [Source:HGNC Symbol;Acc:HGNC:29350]	no	no	no	no
ENSG00000130558	50	100	9	OLFM1	135075422	135121180	olfactomedin 1 [Source:HGNC Symbol;Acc:HGNC:17187]	no	no	no	no
ENSG00000130653	50	100	9	PNPLA7	137459952	137550402	patatin like phospholipase domain containing 7 [Source:HGNC Symbol;Acc:HGNC:24768]	no	no	no	no
ENSG00000130702	50	100	20	LAMA5	62307955	62367312	laminin subunit alpha 5 [Source:HGNC Symbol;Acc:HGNC:6485]	no	no	no	no
ENSG00000130766	50	100	1	SESN2	28259518	28282491	sestrin 2 [Source:HGNC Symbol;Acc:HGNC:20746]	no	no	no	no
ENSG00000130816	50	100	19	DNMT1	10133342	10231286	DNA methyltransferase 1 [Source:HGNC Symbol;Acc:HGNC:2976]	no	no	no	no
ENSG00000130830	50	100	X	MPP1	154778684	154821007	MAGUK p55 scaffold protein 1 [Source:HGNC Symbol;Acc:HGNC:7219]	no	no	no	yes
ENSG00000130881	50	100	19	LRP3	33177603	33208864	LDL receptor related protein 3 [Source:HGNC Symbol;Acc:HGNC:6695]	no	no	no	no
ENSG00000131002	50	100	Y	TXLNGY	19567382	19604120	taxilin gamma pseudogene, Y-linked [Source:HGNC Symbol;Acc:HGNC:18473]	no	no	no	no
ENSG00000131018	50	100	6	SYNE1	152121687	152637801	spectrin repeat containing nuclear envelope protein 1 [Source:HGNC Symbol;Acc:HGNC:17089]	no	no	no	no
ENSG00000131351	50	100	19	HAUS8	17049729	17075625	HAUS augmin like complex subunit 8 [Source:HGNC Symbol;Acc:HGNC:30532]	no	no	no	no
ENSG00000131370	50	100	3	SH3BP5	15254353	15341368	SH3 domain binding protein 5 [Source:HGNC Symbol;Acc:HGNC:10827]	no	no	no	no
ENSG00000131389	50	100	3	SLC6A6	14402576	14489349	solute carrier family 6 member 6 [Source:HGNC Symbol;Acc:HGNC:11052]	no	no	no	no
ENSG00000131462	50	100	17	TUBG1	42609641	42615238	tubulin gamma 1 [Source:HGNC Symbol;Acc:HGNC:12417]	no	no	no	no
ENSG00000131591	50	100	1	C1orf159	1081818	1116361	chromosome 1 open reading frame 159 [Source:HGNC Symbol;Acc:HGNC:26062]	no	no	no	no
ENSG00000131634	50	100	16	TMEM204	1528688	1555580	transmembrane protein 204 [Source:HGNC Symbol;Acc:HGNC:14158]	no	no	no	no
ENSG00000131724	50	100	X	IL13RA1	118727133	118794535	interleukin 13 receptor subunit alpha 1 [Source:HGNC Symbol;Acc:HGNC:5974]	no	no	no	yes
ENSG00000131747	50	100	17	TOP2A	40388525	40417896	DNA topoisomerase II alpha [Source:HGNC Symbol;Acc:HGNC:11989]	no	no	no	no
ENSG00000131914	50	100	1	LIN28A	26410817	26429728	lin-28 homolog A [Source:HGNC Symbol;Acc:HGNC:15986]	no	no	no	no
ENSG00000131941	50	100	19	RHPN2	32978592	33064888	rhophilin Rho GTPase binding protein 2 [Source:HGNC Symbol;Acc:HGNC:19974]	no	no	no	no
ENSG00000132031	50	100	2	MATN3	19992052	20012668	matrilin 3 [Source:HGNC Symbol;Acc:HGNC:6909]	no	no	no	no
ENSG00000132204	50	100	18	LINC00470	1254383	1408344	long intergenic non-protein coding RNA 470 [Source:HGNC Symbol;Acc:HGNC:1225]	no	no	no	no
ENSG00000132334	50	100	10	PTPRE	127907103	128085855	protein tyrosine phosphatase receptor type E [Source:HGNC Symbol;Acc:HGNC:9669]	no	no	no	no
ENSG00000132386	50	100	17	SERPINF1	1762029	1777565	serpin family F member 1 [Source:HGNC Symbol;Acc:HGNC:8824]	no	no	no	no
ENSG00000132423	50	100	6	COQ3	99369401	99394195	coenzyme Q3, methyltransferase [Source:HGNC Symbol;Acc:HGNC:18175]	no	no	no	no
ENSG00000132541	50	100	8	RIDA	98102344	98117171	reactive intermediate imine deaminase A homolog [Source:HGNC Symbol;Acc:HGNC:16897]	no	no	no	no
ENSG00000132561	50	100	8	MATN2	97868840	98036724	matrilin 2 [Source:HGNC Symbol;Acc:HGNC:6908]	no	no	no	no
ENSG00000132570	50	100	5	PCBD2	134905120	135007959	pterin-4 alpha-carbinolamine dehydratase 2 [Source:HGNC Symbol;Acc:HGNC:24474]	no	no	no	no
ENSG00000132639	50	100	20	SNAP25	10172395	10308258	synaptosome associated protein 25 [Source:HGNC Symbol;Acc:HGNC:11132]	no	no	no	no
ENSG00000132646	50	100	20	PCNA	5114953	5126626	proliferating cell nuclear antigen [Source:HGNC Symbol;Acc:HGNC:8729]	no	no	no	no
ENSG00000132669	50	100	20	RIN2	19757606	20002457	Ras and Rab interactor 2 [Source:HGNC Symbol;Acc:HGNC:18750]	no	no	no	no
ENSG00000132773	50	100	1	TOE1	45340052	45343973	target of EGR1, exonuclease [Source:HGNC Symbol;Acc:HGNC:15954]	no	no	no	no
ENSG00000132849	50	100	1	PATJ	61742477	62178675	PATJ crumbs cell polarity complex component [Source:HGNC Symbol;Acc:HGNC:28881]	no	no	no	no
ENSG00000132879	50	100	1	FBXO44	11654375	11663327	F-box protein 44 [Source:HGNC Symbol;Acc:HGNC:24847]	no	no	no	no
ENSG00000132938	50	100	13	MTUS2	28820339	29505947	microtubule associated scaffold protein 2 [Source:HGNC Symbol;Acc:HGNC:20595]	no	no	no	no
ENSG00000132967	50	100	3	HMGB1P5	22381720	22382929	high mobility group box 1 pseudogene 5 [Source:HGNC Symbol;Acc:HGNC:4997]	no	no	no	no
ENSG00000133119	50	100	13	RFC3	33818069	33966558	replication factor C subunit 3 [Source:HGNC Symbol;Acc:HGNC:9971]	no	no	no	no
ENSG00000133131	50	100	X	MORC4	106813871	107000212	MORC family CW-type zinc finger 4 [Source:HGNC Symbol;Acc:HGNC:23485]	no	no	no	yes
ENSG00000133256	50	100	4	PDE6B	625573	670782	phosphodiesterase 6B [Source:HGNC Symbol;Acc:HGNC:8786]	no	no	no	no
ENSG00000133315	50	100	11	MACROD1	63998558	64166113	mono-ADP ribosylhydrolase 1 [Source:HGNC Symbol;Acc:HGNC:29598]	no	no	no	no
ENSG00000133519	50	100	22	ZDHHC8BP	23397938	23402157	ZDHHC8B, pseudogene [Source:HGNC Symbol;Acc:HGNC:26461]	no	no	no	no
ENSG00000133640	50	100	12	LRRIQ1	85036314	85264457	leucine rich repeats and IQ motif containing 1 [Source:HGNC Symbol;Acc:HGNC:25708]	no	no	no	no
ENSG00000133687	50	100	12	TMTC1	29500840	29784759	transmembrane O-mannosyltransferase targeting cadherins 1 [Source:HGNC Symbol;Acc:HGNC:24099]	no	no	no	no
ENSG00000133739	50	100	8	LRRCC1	85107215	85146080	leucine rich repeat and coiled-coil centrosomal protein 1 [Source:HGNC Symbol;Acc:HGNC:29373]	no	no	no	no
ENSG00000133863	50	100	8	TEX15	30831544	30913008	testis expressed 15, meiosis and synapsis associated [Source:HGNC Symbol;Acc:HGNC:11738]	no	no	no	no
ENSG00000133943	50	100	14	DGLUCY	91060333	91225632	D-glutamate cyclase [Source:HGNC Symbol;Acc:HGNC:20498]	no	no	no	no
ENSG00000133980	50	100	14	VRTN	74303069	74360008	vertebrae development associated [Source:HGNC Symbol;Acc:HGNC:20223]	no	no	no	no
ENSG00000134030	50	100	18	CTIF	48539031	48863217	cap binding complex dependent translation initiation factor [Source:HGNC Symbol;Acc:HGNC:23925]	no	no	no	no
ENSG00000134057	50	100	5	CCNB1	69167135	69178245	cyclin B1 [Source:HGNC Symbol;Acc:HGNC:1579]	no	no	no	no
ENSG00000134160	50	100	15	TRPM1	31001065	31161160	transient receptor potential cation channel subfamily M member 1 [Source:HGNC Symbol;Acc:HGNC:7146]	no	no	no	no
ENSG00000134201	50	100	1	GSTM5	109711780	109775428	glutathione S-transferase mu 5 [Source:HGNC Symbol;Acc:HGNC:4637]	no	no	no	no
ENSG00000134207	50	100	1	SYT6	114089291	114153880	synaptotagmin 6 [Source:HGNC Symbol;Acc:HGNC:18638]	no	no	no	no
ENSG00000134222	50	100	1	PSRC1	109279556	109283186	proline and serine rich coiled-coil 1 [Source:HGNC Symbol;Acc:HGNC:24472]	no	no	no	no
ENSG00000134245	50	100	1	WNT2B	112466541	112530165	Wnt family member 2B [Source:HGNC Symbol;Acc:HGNC:12781]	no	no	no	no
ENSG00000134253	50	100	1	TRIM45	117111060	117122587	tripartite motif containing 45 [Source:HGNC Symbol;Acc:HGNC:19018]	no	no	no	no
ENSG00000134323	50	100	2	MYCN	15940550	15947007	MYCN proto-oncogene, bHLH transcription factor [Source:HGNC Symbol;Acc:HGNC:7559]	no	no	no	no
ENSG00000134333	50	100	11	LDHA	18394560	18408425	lactate dehydrogenase A [Source:HGNC Symbol;Acc:HGNC:6535]	no	no	no	no
ENSG00000134363	50	100	5	FST	53480626	53487134	follistatin [Source:HGNC Symbol;Acc:HGNC:3971]	no	no	no	no
ENSG00000134376	50	100	1	CRB1	197268204	197478455	crumbs cell polarity complex component 1 [Source:HGNC Symbol;Acc:HGNC:2343]	no	no	no	no
ENSG00000134508	50	100	18	CABLES1	23134564	23260470	Cdk5 and Abl enzyme substrate 1 [Source:HGNC Symbol;Acc:HGNC:25097]	no	no	no	no
ENSG00000134594	50	100	X	RAB33A	130171962	130184870	RAB33A, member RAS oncogene family [Source:HGNC Symbol;Acc:HGNC:9773]	no	no	no	yes
ENSG00000134684	50	100	1	YARS1	32775237	32818031	tyrosyl-tRNA synthetase 1 [Source:HGNC Symbol;Acc:HGNC:12840]	no	no	no	no
ENSG00000134690	50	100	1	CDCA8	37692481	37709719	cell division cycle associated 8 [Source:HGNC Symbol;Acc:HGNC:14629]	no	no	no	no
ENSG00000134775	50	100	18	FHOD3	36297713	36780220	formin homology 2 domain containing 3 [Source:HGNC Symbol;Acc:HGNC:26178]	no	no	no	no
ENSG00000134802	50	100	11	SLC43A3	57406954	57427580	solute carrier family 43 member 3 [Source:HGNC Symbol;Acc:HGNC:17466]	no	no	no	no
ENSG00000134809	50	100	11	TIMM10	57528464	57530803	translocase of inner mitochondrial membrane 10 [Source:HGNC Symbol;Acc:HGNC:11814]	no	no	no	no
ENSG00000134817	50	100	11	APLNR	57233577	57237250	apelin receptor [Source:HGNC Symbol;Acc:HGNC:339]	no	no	no	no
ENSG00000134986	50	100	5	NREP	111662621	111997464	neuronal regeneration related protein [Source:HGNC Symbol;Acc:HGNC:16834]	no	no	no	no
ENSG00000135045	50	100	9	C9orf40	74946583	74952912	chromosome 9 open reading frame 40 [Source:HGNC Symbol;Acc:HGNC:23433]	no	no	no	no
ENSG00000135069	50	100	9	PSAT1	78297125	78330093	phosphoserine aminotransferase 1 [Source:HGNC Symbol;Acc:HGNC:19129]	no	no	no	no
ENSG00000135090	50	100	12	TAOK3	118149801	118372907	TAO kinase 3 [Source:HGNC Symbol;Acc:HGNC:18133]	no	no	no	no
ENSG00000135253	50	100	7	KCP	128862042	128910719	kielin cysteine rich BMP regulator [Source:HGNC Symbol;Acc:HGNC:17585]	no	no	no	no
ENSG00000135272	50	100	7	MDFIC	114922094	115019917	MyoD family inhibitor domain containing [Source:HGNC Symbol;Acc:HGNC:28870]	no	no	no	no
ENSG00000135298	50	100	6	ADGRB3	68635282	69390571	adhesion G protein-coupled receptor B3 [Source:HGNC Symbol;Acc:HGNC:945]	no	no	no	no
ENSG00000135312	50	100	6	HTR1B	77460924	77463491	5-hydroxytryptamine receptor 1B [Source:HGNC Symbol;Acc:HGNC:5287]	no	no	no	no
ENSG00000135314	50	100	6	KHDC1	73241314	73310365	KH domain containing 1 [Source:HGNC Symbol;Acc:HGNC:21366]	no	no	no	no
ENSG00000135407	50	100	12	AVIL	57797376	57818734	advillin [Source:HGNC Symbol;Acc:HGNC:14188]	no	no	no	no
ENSG00000135447	50	100	12	PPP1R1A	54575387	54588659	protein phosphatase 1 regulatory inhibitor subunit 1A [Source:HGNC Symbol;Acc:HGNC:9286]	no	no	no	no
ENSG00000135476	50	100	12	ESPL1	53268299	53293638	extra spindle pole bodies like 1, separase [Source:HGNC Symbol;Acc:HGNC:16856]	no	no	no	no
ENSG00000135525	50	100	6	MAP7	136342281	136550819	microtubule associated protein 7 [Source:HGNC Symbol;Acc:HGNC:6869]	no	no	no	no
ENSG00000135643	50	100	12	KCNMB4	70366290	70434292	potassium calcium-activated channel subfamily M regulatory beta subunit 4 [Source:HGNC Symbol;Acc:HGNC:6289]	no	no	no	no
ENSG00000135763	50	100	1	URB2	229626247	229660200	URB2 ribosome biogenesis homolog [Source:HGNC Symbol;Acc:HGNC:28967]	no	no	no	no
ENSG00000135842	50	100	1	NIBAN1	184790724	184974508	niban apoptosis regulator 1 [Source:HGNC Symbol;Acc:HGNC:16784]	no	no	no	no
ENSG00000135899	50	100	2	SP110	230165186	230225729	SP110 nuclear body protein [Source:HGNC Symbol;Acc:HGNC:5401]	no	no	no	no
ENSG00000135903	50	100	2	PAX3	222199887	222298998	paired box 3 [Source:HGNC Symbol;Acc:HGNC:8617]	no	no	no	no
ENSG00000135919	50	100	2	SERPINE2	223975045	224039318	serpin family E member 2 [Source:HGNC Symbol;Acc:HGNC:8951]	no	no	no	no
ENSG00000135926	50	100	2	TMBIM1	218274197	218292586	transmembrane BAX inhibitor motif containing 1 [Source:HGNC Symbol;Acc:HGNC:23410]	no	no	no	no
ENSG00000135931	50	100	2	ARMC9	231198546	231376848	armadillo repeat containing 9 [Source:HGNC Symbol;Acc:HGNC:20730]	no	no	no	no
ENSG00000135951	50	100	2	TSGA10	98997261	99154964	testis specific 10 [Source:HGNC Symbol;Acc:HGNC:14927]	no	no	no	no
ENSG00000135976	50	100	2	ANKRD36	97113153	97264521	ankyrin repeat domain 36 [Source:HGNC Symbol;Acc:HGNC:24079]	no	no	no	no
ENSG00000136010	50	100	12	ALDH1L2	105019784	105107643	aldehyde dehydrogenase 1 family member L2 [Source:HGNC Symbol;Acc:HGNC:26777]	no	no	no	no
ENSG00000136014	50	100	12	USP44	95516560	95551476	ubiquitin specific peptidase 44 [Source:HGNC Symbol;Acc:HGNC:20064]	no	no	no	no
ENSG00000136048	50	100	12	DRAM1	101877580	102012130	DNA damage regulated autophagy modulator 1 [Source:HGNC Symbol;Acc:HGNC:25645]	no	no	no	no
ENSG00000136068	50	100	3	FLNB	58008398	58172251	filamin B [Source:HGNC Symbol;Acc:HGNC:3755]	no	no	no	no
ENSG00000136158	50	100	13	SPRY2	80335976	80341126	sprouty RTK signaling antagonist 2 [Source:HGNC Symbol;Acc:HGNC:11270]	no	no	no	no
ENSG00000136159	50	100	13	NUDT15	48037726	48047221	nudix hydrolase 15 [Source:HGNC Symbol;Acc:HGNC:23063]	no	no	no	no
ENSG00000136235	50	100	7	GPNMB	23235967	23275108	glycoprotein nmb [Source:HGNC Symbol;Acc:HGNC:4462]	no	no	no	no
ENSG00000136383	50	100	15	ALPK3	84817356	84873479	alpha kinase 3 [Source:HGNC Symbol;Acc:HGNC:17574]	no	no	no	no
ENSG00000136425	50	100	15	CIB2	78104606	78131535	calcium and integrin binding family member 2 [Source:HGNC Symbol;Acc:HGNC:24579]	no	no	no	no
ENSG00000136490	50	100	17	LIMD2	63695888	63701172	LIM domain containing 2 [Source:HGNC Symbol;Acc:HGNC:28142]	no	no	no	no
ENSG00000136531	50	100	2	SCN2A	165194993	165392310	sodium voltage-gated channel alpha subunit 2 [Source:HGNC Symbol;Acc:HGNC:10588]	no	no	no	no
ENSG00000136603	50	100	3	SKIL	170357342	170396835	SKI like proto-oncogene [Source:HGNC Symbol;Acc:HGNC:10897]	no	no	no	no
ENSG00000136854	50	100	9	STXBP1	127579370	127696027	syntaxin binding protein 1 [Source:HGNC Symbol;Acc:HGNC:11444]	no	no	no	no
ENSG00000136859	50	100	9	ANGPTL2	127087348	127122635	angiopoietin like 2 [Source:HGNC Symbol;Acc:HGNC:490]	no	no	no	no
ENSG00000136869	50	100	9	TLR4	117704175	117724735	toll like receptor 4 [Source:HGNC Symbol;Acc:HGNC:11850]	no	no	no	no
ENSG00000136881	50	100	9	BAAT	101354182	101385400	bile acid-CoA:amino acid N-acyltransferase [Source:HGNC Symbol;Acc:HGNC:932]	no	no	no	no
ENSG00000136895	50	100	9	GARNL3	127224265	127393660	GTPase activating Rap/RanGAP domain like 3 [Source:HGNC Symbol;Acc:HGNC:25425]	no	no	no	no
ENSG00000136918	50	100	9	WDR38	124853417	124857890	WD repeat domain 38 [Source:HGNC Symbol;Acc:HGNC:23745]	no	no	no	no
ENSG00000136943	50	100	9	CTSV	97029677	97156556	cathepsin V [Source:HGNC Symbol;Acc:HGNC:2538]	no	no	no	no
ENSG00000136960	50	100	8	ENPP2	119557086	119673453	ectonucleotide pyrophosphatase/phosphodiesterase 2 [Source:HGNC Symbol;Acc:HGNC:3357]	no	no	no	no
ENSG00000136982	50	100	8	DSCC1	119833976	119855894	DNA replication and sister chromatid cohesion 1 [Source:HGNC Symbol;Acc:HGNC:24453]	no	no	no	no
ENSG00000137070	50	100	9	IL11RA	34652162	34661902	interleukin 11 receptor subunit alpha [Source:HGNC Symbol;Acc:HGNC:5967]	no	no	no	no
ENSG00000137094	50	100	9	DNAJB5	34989641	34998900	DnaJ heat shock protein family (Hsp40) member B5 [Source:HGNC Symbol;Acc:HGNC:14887]	no	no	no	no
ENSG00000137135	50	100	9	ARHGEF39	35658875	35675866	Rho guanine nucleotide exchange factor 39 [Source:HGNC Symbol;Acc:HGNC:25909]	no	no	no	no
ENSG00000137142	50	100	9	IGFBPL1	38406528	38424454	insulin like growth factor binding protein like 1 [Source:HGNC Symbol;Acc:HGNC:20081]	no	no	no	no
ENSG00000137193	50	100	6	PIM1	37170152	37175428	Pim-1 proto-oncogene, serine/threonine kinase [Source:HGNC Symbol;Acc:HGNC:8986]	no	no	no	no
ENSG00000137218	50	100	6	FRS3	41770176	41786542	fibroblast growth factor receptor substrate 3 [Source:HGNC Symbol;Acc:HGNC:16970]	no	no	no	no
ENSG00000137252	50	100	6	HCRTR2	55106460	55282617	hypocretin receptor 2 [Source:HGNC Symbol;Acc:HGNC:4849]	no	no	no	no
ENSG00000137265	50	100	6	IRF4	391739	411443	interferon regulatory factor 4 [Source:HGNC Symbol;Acc:HGNC:6119]	no	no	no	no
ENSG00000137267	50	100	6	TUBB2A	3153497	3157544	tubulin beta 2A class IIa [Source:HGNC Symbol;Acc:HGNC:12412]	no	no	no	no
ENSG00000137285	50	100	6	TUBB2B	3223324	3231730	tubulin beta 2B class IIb [Source:HGNC Symbol;Acc:HGNC:30829]	no	no	no	no
ENSG00000137309	50	100	6	HMGA1	34236873	34246231	high mobility group AT-hook 1 [Source:HGNC Symbol;Acc:HGNC:5010]	no	no	no	no
ENSG00000137449	50	100	4	CPEB2	15002481	15070153	cytoplasmic polyadenylation element binding protein 2 [Source:HGNC Symbol;Acc:HGNC:21745]	no	no	no	no
ENSG00000137486	50	100	11	ARRB1	75260122	75351705	arrestin beta 1 [Source:HGNC Symbol;Acc:HGNC:711]	no	no	no	no
ENSG00000137501	50	100	11	SYTL2	85694224	85811159	synaptotagmin like 2 [Source:HGNC Symbol;Acc:HGNC:15585]	no	no	no	no
ENSG00000137507	50	100	11	LRRC32	76657524	76670747	leucine rich repeat containing 32 [Source:HGNC Symbol;Acc:HGNC:4161]	no	no	no	no
ENSG00000137509	50	100	11	PRCP	82822936	82970584	prolylcarboxypeptidase [Source:HGNC Symbol;Acc:HGNC:9344]	no	no	no	no
ENSG00000137558	50	100	8	PI15	74824534	74855029	peptidase inhibitor 15 [Source:HGNC Symbol;Acc:HGNC:8946]	no	no	no	no
ENSG00000137573	50	100	8	SULF1	69466624	69660915	sulfatase 1 [Source:HGNC Symbol;Acc:HGNC:20391]	no	no	no	no
ENSG00000137691	50	100	11	CFAP300	102047437	102084554	cilia and flagella associated protein 300 [Source:HGNC Symbol;Acc:HGNC:28188]	no	no	no	no
ENSG00000137809	50	100	15	ITGA11	68296532	68432163	integrin subunit alpha 11 [Source:HGNC Symbol;Acc:HGNC:6136]	no	no	no	no
ENSG00000137812	50	100	15	KNL1	40594020	40664342	kinetochore scaffold 1 [Source:HGNC Symbol;Acc:HGNC:24054]	no	no	no	no
ENSG00000137817	50	100	15	PARP6	72241181	72272999	poly(ADP-ribose) polymerase family member 6 [Source:HGNC Symbol;Acc:HGNC:26921]	no	no	no	no
ENSG00000137819	50	100	15	PAQR5	69298912	69407780	progestin and adipoQ receptor family member 5 [Source:HGNC Symbol;Acc:HGNC:29645]	no	no	no	no
ENSG00000137877	50	100	15	SPTBN5	41848146	41894053	spectrin beta, non-erythrocytic 5 [Source:HGNC Symbol;Acc:HGNC:15680]	no	no	no	no
ENSG00000137941	50	100	1	TTLL7	83865024	83999150	tubulin tyrosine ligase like 7 [Source:HGNC Symbol;Acc:HGNC:26242]	no	no	no	no
ENSG00000137959	50	100	1	IFI44L	78619902	78646145	interferon induced protein 44 like [Source:HGNC Symbol;Acc:HGNC:17817]	no	no	no	no
ENSG00000137965	50	100	1	IFI44	78649796	78664078	interferon induced protein 44 [Source:HGNC Symbol;Acc:HGNC:16938]	no	no	no	no
ENSG00000137968	50	100	1	SLC44A5	75202129	75611114	solute carrier family 44 member 5 [Source:HGNC Symbol;Acc:HGNC:28524]	no	no	no	no
ENSG00000138092	50	100	2	CENPO	24793136	24822376	centromere protein O [Source:HGNC Symbol;Acc:HGNC:28152]	no	no	no	no
ENSG00000138101	50	100	2	DTNB	25377198	25673647	dystrobrevin beta [Source:HGNC Symbol;Acc:HGNC:3058]	no	no	no	no
ENSG00000138136	50	100	10	LBX1	101226994	101229463	ladybird homeobox 1 [Source:HGNC Symbol;Acc:HGNC:16960]	no	no	no	no
ENSG00000138160	50	100	10	KIF11	92574105	92655395	kinesin family member 11 [Source:HGNC Symbol;Acc:HGNC:6388]	no	no	no	no
ENSG00000138180	50	100	10	CEP55	93496612	93529092	centrosomal protein 55 [Source:HGNC Symbol;Acc:HGNC:1161]	no	no	no	no
ENSG00000138182	50	100	10	KIF20B	89701590	89774939	kinesin family member 20B [Source:HGNC Symbol;Acc:HGNC:7212]	no	no	no	no
ENSG00000138193	50	100	10	PLCE1	93993931	94332823	phospholipase C epsilon 1 [Source:HGNC Symbol;Acc:HGNC:17175]	no	no	no	no
ENSG00000138346	50	100	10	DNA2	68414064	68472121	DNA replication helicase/nuclease 2 [Source:HGNC Symbol;Acc:HGNC:2939]	no	no	no	no
ENSG00000138395	50	100	2	CDK15	201790461	201895550	cyclin dependent kinase 15 [Source:HGNC Symbol;Acc:HGNC:14434]	no	no	no	no
ENSG00000138400	50	100	2	MDH1B	206737763	206765328	malate dehydrogenase 1B [Source:HGNC Symbol;Acc:HGNC:17836]	no	no	no	no
ENSG00000138468	50	100	3	SENP7	101324205	101513241	SUMO specific peptidase 7 [Source:HGNC Symbol;Acc:HGNC:30402]	no	no	no	no
ENSG00000138623	50	100	15	SEMA7A	74409289	74433958	semaphorin 7A (John Milton Hagen blood group) [Source:HGNC Symbol;Acc:HGNC:10741]	no	no	no	no
ENSG00000138639	50	100	4	ARHGAP24	85475150	86002668	Rho GTPase activating protein 24 [Source:HGNC Symbol;Acc:HGNC:25361]	no	no	no	no
ENSG00000138653	50	100	4	NDST4	114827763	115113876	N-deacetylase and N-sulfotransferase 4 [Source:HGNC Symbol;Acc:HGNC:20779]	no	no	no	no
ENSG00000138688	50	100	4	BLTP1	122152331	122364167	bridge-like lipid transfer protein family member 1 [Source:HGNC Symbol;Acc:HGNC:26953]	no	no	no	no
ENSG00000138738	50	100	4	PRDM5	120684919	120922870	PR/SET domain 5 [Source:HGNC Symbol;Acc:HGNC:9349]	no	no	no	no
ENSG00000138769	50	100	4	CDKL2	75576496	75630716	cyclin dependent kinase like 2 [Source:HGNC Symbol;Acc:HGNC:1782]	no	no	no	no
ENSG00000138778	50	100	4	CENPE	103105349	103198445	centromere protein E [Source:HGNC Symbol;Acc:HGNC:1856]	no	no	no	no
ENSG00000138795	50	100	4	LEF1	108047545	108168956	lymphoid enhancer binding factor 1 [Source:HGNC Symbol;Acc:HGNC:6551]	no	no	no	no
ENSG00000138798	50	100	4	EGF	109912883	110013766	epidermal growth factor [Source:HGNC Symbol;Acc:HGNC:3229]	no	no	no	no
ENSG00000138944	50	100	22	SHISAL1	44243665	44312951	shisa like 1 [Source:HGNC Symbol;Acc:HGNC:29335]	no	no	no	no
ENSG00000139044	50	100	12	B4GALNT3	459939	563509	beta-1,4-N-acetyl-galactosaminyltransferase 3 [Source:HGNC Symbol;Acc:HGNC:24137]	no	no	no	no
ENSG00000139117	50	100	12	CPNE8	38646822	38907430	copine 8 [Source:HGNC Symbol;Acc:HGNC:23498]	no	no	no	no
ENSG00000139146	50	100	12	SINHCAF	31280584	31327058	SIN3-HDAC complex associated factor [Source:HGNC Symbol;Acc:HGNC:30702]	no	no	no	no
ENSG00000139173	50	100	12	TMEM117	43835967	44389762	transmembrane protein 117 [Source:HGNC Symbol;Acc:HGNC:25308]	no	no	no	no
ENSG00000139174	50	100	12	PRICKLE1	42456757	42590355	prickle planar cell polarity protein 1 [Source:HGNC Symbol;Acc:HGNC:17019]	no	no	no	no
ENSG00000139178	50	100	12	C1RL	7089587	7109238	complement C1r subcomponent like [Source:HGNC Symbol;Acc:HGNC:21265]	no	no	no	no
ENSG00000139219	50	100	12	COL2A1	47972967	48004554	collagen type II alpha 1 chain [Source:HGNC Symbol;Acc:HGNC:2200]	no	no	no	no
ENSG00000139269	50	100	12	INHBE	57452323	57459280	inhibin subunit beta E [Source:HGNC Symbol;Acc:HGNC:24029]	no	no	no	no
ENSG00000139318	50	100	12	DUSP6	89347235	89352501	dual specificity phosphatase 6 [Source:HGNC Symbol;Acc:HGNC:3072]	no	no	no	no
ENSG00000139323	50	100	12	POC1B	89419718	89526047	POC1 centriolar protein B [Source:HGNC Symbol;Acc:HGNC:30836]	no	no	no	no
ENSG00000139343	50	100	12	SNRPF	95858952	95903828	small nuclear ribonucleoprotein polypeptide F [Source:HGNC Symbol;Acc:HGNC:11162]	no	no	no	no
ENSG00000139352	50	100	12	ASCL1	102957674	102960513	achaete-scute family bHLH transcription factor 1 [Source:HGNC Symbol;Acc:HGNC:738]	no	no	no	no
ENSG00000139514	50	100	13	SLC7A1	29509414	29595688	solute carrier family 7 member 1 [Source:HGNC Symbol;Acc:HGNC:11057]	no	no	no	no
ENSG00000139537	50	100	12	CCDC65	48904110	48931840	coiled-coil domain containing 65 [Source:HGNC Symbol;Acc:HGNC:29937]	no	no	no	no
ENSG00000139618	50	100	13	BRCA2	32315086	32400268	BRCA2 DNA repair associated [Source:HGNC Symbol;Acc:HGNC:1101]	no	no	no	no
ENSG00000139631	50	100	12	CSAD	53157663	53180925	cysteine sulfinic acid decarboxylase [Source:HGNC Symbol;Acc:HGNC:18966]	no	no	no	no
ENSG00000139687	50	100	13	RB1	48303744	48599436	RB transcriptional corepressor 1 [Source:HGNC Symbol;Acc:HGNC:9884]	no	no	no	no
ENSG00000139722	50	100	12	VPS37B	122865330	122896127	VPS37B subunit of ESCRT-I [Source:HGNC Symbol;Acc:HGNC:25754]	no	no	no	no
ENSG00000139767	50	100	12	SRRM4	118981541	119163051	serine/arginine repetitive matrix 4 [Source:HGNC Symbol;Acc:HGNC:29389]	no	no	no	no
ENSG00000139874	50	100	14	SSTR1	38207904	38213067	somatostatin receptor 1 [Source:HGNC Symbol;Acc:HGNC:11330]	no	no	no	no
ENSG00000139890	50	100	14	REM2	22883222	22887678	RRAD and GEM like GTPase 2 [Source:HGNC Symbol;Acc:HGNC:20248]	no	no	no	no
ENSG00000139946	50	100	14	PELI2	56117814	56301524	pellino E3 ubiquitin protein ligase family member 2 [Source:HGNC Symbol;Acc:HGNC:8828]	no	no	no	no
ENSG00000139971	50	100	14	ARMH4	57999735	58298139	armadillo like helical domain containing 4 [Source:HGNC Symbol;Acc:HGNC:19846]	no	no	no	no
ENSG00000139973	50	100	14	SYT16	61811974	62112550	synaptotagmin 16 [Source:HGNC Symbol;Acc:HGNC:23142]	no	no	no	no
ENSG00000139974	50	100	14	SLC38A6	60981114	61114316	solute carrier family 38 member 6 [Source:HGNC Symbol;Acc:HGNC:19863]	no	no	no	no
ENSG00000140044	50	100	14	JDP2	75427716	75474111	Jun dimerization protein 2 [Source:HGNC Symbol;Acc:HGNC:17546]	no	no	no	no
ENSG00000140057	50	100	14	AK7	96392128	96489427	adenylate kinase 7 [Source:HGNC Symbol;Acc:HGNC:20091]	no	no	no	no
ENSG00000140104	50	100	14	CLBA1	104985775	105010482	clathrin binding box of aftiphilin containing 1 [Source:HGNC Symbol;Acc:HGNC:20126]	no	no	no	no
ENSG00000140280	50	100	15	LYSMD2	51723011	51751585	LysM domain containing 2 [Source:HGNC Symbol;Acc:HGNC:28571]	no	no	no	no
ENSG00000140368	50	100	15	PSTPIP1	76993359	77037475	proline-serine-threonine phosphatase interacting protein 1 [Source:HGNC Symbol;Acc:HGNC:9580]	no	no	no	no
ENSG00000140403	50	100	15	DNAJA4	78264086	78282196	DnaJ heat shock protein family (Hsp40) member A4 [Source:HGNC Symbol;Acc:HGNC:14885]	no	no	no	no
ENSG00000140465	50	100	15	CYP1A1	74719542	74725536	cytochrome P450 family 1 subfamily A member 1 [Source:HGNC Symbol;Acc:HGNC:2595]	no	no	no	no
ENSG00000140525	50	100	15	FANCI	89243945	89317261	FA complementation group I [Source:HGNC Symbol;Acc:HGNC:25568]	no	no	no	no
ENSG00000140548	50	100	15	ZNF710	90001324	90082206	zinc finger protein 710 [Source:HGNC Symbol;Acc:HGNC:25352]	no	no	no	no
ENSG00000140682	50	100	16	TGFB1I1	31471585	31477960	transforming growth factor beta 1 induced transcript 1 [Source:HGNC Symbol;Acc:HGNC:11767]	no	no	no	no
ENSG00000140795	50	100	16	MYLK3	46702282	46790407	myosin light chain kinase 3 [Source:HGNC Symbol;Acc:HGNC:29826]	no	no	no	no
ENSG00000140832	50	100	16	MARVELD3	71626161	71642114	MARVEL domain containing 3 [Source:HGNC Symbol;Acc:HGNC:30525]	no	no	no	no
ENSG00000140835	50	100	16	CHST4	71525233	71538748	carbohydrate sulfotransferase 4 [Source:HGNC Symbol;Acc:HGNC:1972]	no	no	no	no
ENSG00000140854	50	100	16	KATNB1	57735739	57757244	katanin regulatory subunit B1 [Source:HGNC Symbol;Acc:HGNC:6217]	no	no	no	no
ENSG00000140937	50	100	16	CDH11	64943753	65126112	cadherin 11 [Source:HGNC Symbol;Acc:HGNC:1750]	no	no	no	no
ENSG00000141179	50	100	17	PCTP	55751051	55842830	phosphatidylcholine transfer protein [Source:HGNC Symbol;Acc:HGNC:8752]	no	no	no	no
ENSG00000141298	50	100	17	SSH2	29625938	29930276	slingshot protein phosphatase 2 [Source:HGNC Symbol;Acc:HGNC:30580]	no	no	no	no
ENSG00000141404	50	100	18	GNAL	11689264	11885685	G protein subunit alpha L [Source:HGNC Symbol;Acc:HGNC:4388]	no	no	no	no
ENSG00000141433	50	100	18	ADCYAP1	904871	912172	adenylate cyclase activating polypeptide 1 [Source:HGNC Symbol;Acc:HGNC:241]	no	no	no	no
ENSG00000141449	50	100	18	GREB1L	21242232	21526112	GREB1 like retinoic acid receptor coactivator [Source:HGNC Symbol;Acc:HGNC:31042]	no	no	no	no
ENSG00000141480	50	100	17	ARRB2	4710596	4721499	arrestin beta 2 [Source:HGNC Symbol;Acc:HGNC:712]	no	no	no	no
ENSG00000141504	50	100	17	SAT2	7626234	7627876	spermidine/spermine N1-acetyltransferase family member 2 [Source:HGNC Symbol;Acc:HGNC:23160]	no	no	no	no
ENSG00000141519	50	100	17	CCDC40	80036632	80100613	coiled-coil domain containing 40 [Source:HGNC Symbol;Acc:HGNC:26090]	no	no	no	no
ENSG00000141526	50	100	17	SLC16A3	82217934	82261129	solute carrier family 16 member 3 [Source:HGNC Symbol;Acc:HGNC:10924]	no	no	no	no
ENSG00000141552	50	100	17	ANAPC11	81890790	81900991	anaphase promoting complex subunit 11 [Source:HGNC Symbol;Acc:HGNC:14452]	no	no	no	no
ENSG00000141569	50	100	17	TRIM65	75880335	75896951	tripartite motif containing 65 [Source:HGNC Symbol;Acc:HGNC:27316]	no	no	no	no
ENSG00000141576	50	100	17	RNF157	76142465	76240493	ring finger protein 157 [Source:HGNC Symbol;Acc:HGNC:29402]	no	no	no	no
ENSG00000141622	50	100	18	RNF165	46326809	46463140	ring finger protein 165 [Source:HGNC Symbol;Acc:HGNC:31696]	no	no	no	no
ENSG00000141639	50	100	18	MAPK4	50560087	50731826	mitogen-activated protein kinase 4 [Source:HGNC Symbol;Acc:HGNC:6878]	no	no	no	no
ENSG00000141837	50	100	19	CACNA1A	13206442	13633025	calcium voltage-gated channel subunit alpha1 A [Source:HGNC Symbol;Acc:HGNC:1388]	no	no	no	no
ENSG00000141985	50	100	19	SH3GL1	4360370	4400547	SH3 domain containing GRB2 like 1, endophilin A2 [Source:HGNC Symbol;Acc:HGNC:10830]	no	no	no	no
ENSG00000142149	50	100	21	HUNK	31873020	32044633	hormonally up-regulated Neu-associated kinase [Source:HGNC Symbol;Acc:HGNC:13326]	no	no	no	no
ENSG00000142173	50	100	21	COL6A2	46098112	46132848	collagen type VI alpha 2 chain [Source:HGNC Symbol;Acc:HGNC:2212]	no	no	no	no
ENSG00000142178	50	100	21	SIK1	43414483	43427131	salt inducible kinase 1 [Source:HGNC Symbol;Acc:HGNC:11142]	no	no	no	no
ENSG00000142549	50	100	19	IGLON5	51311644	51330891	IgLON family member 5 [Source:HGNC Symbol;Acc:HGNC:34550]	no	no	no	no
ENSG00000142583	50	100	1	SLC2A5	9035106	9088478	solute carrier family 2 member 5 [Source:HGNC Symbol;Acc:HGNC:11010]	no	no	no	no
ENSG00000142609	50	100	1	CFAP74	1921951	2003837	cilia and flagella associated protein 74 [Source:HGNC Symbol;Acc:HGNC:29368]	no	no	no	no
ENSG00000142611	50	100	1	PRDM16	3069168	3438621	PR/SET domain 16 [Source:HGNC Symbol;Acc:HGNC:14000]	no	no	no	no
ENSG00000142684	50	100	1	ZNF593	26169908	26170873	zinc finger protein 593 [Source:HGNC Symbol;Acc:HGNC:30943]	no	no	no	no
ENSG00000142694	50	100	1	EVA1B	36322030	36324154	eva-1 homolog B [Source:HGNC Symbol;Acc:HGNC:25558]	no	no	no	no
ENSG00000142731	50	100	4	PLK4	127880893	127899224	polo like kinase 4 [Source:HGNC Symbol;Acc:HGNC:11397]	no	no	no	no
ENSG00000142910	50	100	1	TINAGL1	31576485	31587686	tubulointerstitial nephritis antigen like 1 [Source:HGNC Symbol;Acc:HGNC:19168]	no	no	no	no
ENSG00000142920	50	100	1	AZIN2	33081104	33123492	antizyme inhibitor 2 [Source:HGNC Symbol;Acc:HGNC:29957]	no	no	no	no
ENSG00000142945	50	100	1	KIF2C	44739818	44767767	kinesin family member 2C [Source:HGNC Symbol;Acc:HGNC:6393]	no	no	no	no
ENSG00000143256	50	100	1	PFDN2	161100556	161118055	prefoldin subunit 2 [Source:HGNC Symbol;Acc:HGNC:8867]	no	no	no	no
ENSG00000143476	50	100	1	DTL	212035553	212107400	denticleless E3 ubiquitin protein ligase homolog [Source:HGNC Symbol;Acc:HGNC:30288]	no	no	no	no
ENSG00000143498	50	100	1	TAF1A	222557902	222589933	TATA-box binding protein associated factor, RNA polymerase I subunit A [Source:HGNC Symbol;Acc:HGNC:11532]	no	no	no	no
ENSG00000143507	50	100	1	DUSP10	221701424	221742089	dual specificity phosphatase 10 [Source:HGNC Symbol;Acc:HGNC:3065]	no	no	no	no
ENSG00000143669	50	100	1	LYST	235661041	235883724	lysosomal trafficking regulator [Source:HGNC Symbol;Acc:HGNC:1968]	no	no	no	no
ENSG00000143674	50	100	1	MAP3K21	233327724	233385148	mitogen-activated protein kinase kinase kinase 21 [Source:HGNC Symbol;Acc:HGNC:29798]	no	no	no	no
ENSG00000143819	50	100	1	EPHX1	225810124	225845563	epoxide hydrolase 1 [Source:HGNC Symbol;Acc:HGNC:3401]	no	no	no	no
ENSG00000143847	50	100	1	PPFIA4	203026491	203078740	PTPRF interacting protein alpha 4 [Source:HGNC Symbol;Acc:HGNC:9248]	no	no	no	no
ENSG00000143850	50	100	1	PLEKHA6	204218853	204377665	pleckstrin homology domain containing A6 [Source:HGNC Symbol;Acc:HGNC:17053]	no	no	no	no
ENSG00000143867	50	100	2	OSR1	19351485	19358623	odd-skipped related transcription factor 1 [Source:HGNC Symbol;Acc:HGNC:8111]	no	no	no	no
ENSG00000143942	50	100	2	CHAC2	53767804	53775196	ChaC glutathione specific gamma-glutamylcyclotransferase 2 [Source:HGNC Symbol;Acc:HGNC:32363]	no	no	no	no
ENSG00000143977	50	100	2	SNRPG	70281362	70293740	small nuclear ribonucleoprotein polypeptide G [Source:HGNC Symbol;Acc:HGNC:11163]	no	no	no	no
ENSG00000144115	50	100	2	THNSL2	88170295	88186636	threonine synthase like 2 [Source:HGNC Symbol;Acc:HGNC:25602]	no	no	no	no
ENSG00000144152	50	100	2	FBLN7	112138385	112188218	fibulin 7 [Source:HGNC Symbol;Acc:HGNC:26740]	no	no	no	no
ENSG00000144285	50	100	2	SCN1A	165984641	166149214	sodium voltage-gated channel alpha subunit 1 [Source:HGNC Symbol;Acc:HGNC:10585]	no	no	no	no
ENSG00000144354	50	100	2	CDCA7	173354820	173368997	cell division cycle associated 7 [Source:HGNC Symbol;Acc:HGNC:14628]	no	no	no	no
ENSG00000144362	50	100	2	PHOSPHO2	169694454	169701708	phosphatase, orphan 2 [Source:HGNC Symbol;Acc:HGNC:28316]	no	no	no	no
ENSG00000144406	50	100	2	UNC80	209771832	209999300	unc-80 homolog, NALCN channel complex subunit [Source:HGNC Symbol;Acc:HGNC:26582]	no	no	no	no
ENSG00000144554	50	100	3	FANCD2	10026370	10101932	FA complementation group D2 [Source:HGNC Symbol;Acc:HGNC:3585]	no	no	no	no
ENSG00000144668	50	100	3	ITGA9	37452115	37823507	integrin subunit alpha 9 [Source:HGNC Symbol;Acc:HGNC:6145]	no	no	no	no
ENSG00000144724	50	100	3	PTPRG	61561569	62297609	protein tyrosine phosphatase receptor type G [Source:HGNC Symbol;Acc:HGNC:9671]	no	no	no	no
ENSG00000144730	50	100	3	IL17RD	57089982	57170306	interleukin 17 receptor D [Source:HGNC Symbol;Acc:HGNC:17616]	no	no	no	no
ENSG00000144749	50	100	3	LRIG1	66378797	66501263	leucine rich repeats and immunoglobulin like domains 1 [Source:HGNC Symbol;Acc:HGNC:17360]	no	no	no	no
ENSG00000144810	50	100	3	COL8A1	99638475	99799226	collagen type VIII alpha 1 chain [Source:HGNC Symbol;Acc:HGNC:2215]	no	no	no	no
ENSG00000144868	50	100	3	TMEM108	133038391	133397775	transmembrane protein 108 [Source:HGNC Symbol;Acc:HGNC:28451]	no	no	no	no
ENSG00000145147	50	100	4	SLIT2	20251905	20620561	slit guidance ligand 2 [Source:HGNC Symbol;Acc:HGNC:11086]	no	no	no	no
ENSG00000145220	50	100	4	LYAR	4267701	4290154	Ly1 antibody reactive [Source:HGNC Symbol;Acc:HGNC:26021]	no	no	no	no
ENSG00000145242	50	100	4	EPHA5	65319563	65670495	EPH receptor A5 [Source:HGNC Symbol;Acc:HGNC:3389]	no	no	no	no
ENSG00000145246	50	100	4	ATP10D	47485275	47593486	ATPase phospholipid transporting 10D (putative) [Source:HGNC Symbol;Acc:HGNC:13549]	no	no	no	no
ENSG00000145386	50	100	4	CCNA2	121816444	121823883	cyclin A2 [Source:HGNC Symbol;Acc:HGNC:1578]	no	no	no	no
ENSG00000145423	50	100	4	SFRP2	153780591	153789083	secreted frizzled related protein 2 [Source:HGNC Symbol;Acc:HGNC:10777]	no	no	no	no
ENSG00000145526	50	100	5	CDH18	19471296	20575873	cadherin 18 [Source:HGNC Symbol;Acc:HGNC:1757]	no	no	no	no
ENSG00000145675	50	100	5	PIK3R1	68215740	68301821	phosphoinositide-3-kinase regulatory subunit 1 [Source:HGNC Symbol;Acc:HGNC:8979]	no	no	no	no
ENSG00000146166	50	100	6	LGSN	63275951	63319983	lengsin, lens protein with glutamine synthetase domain [Source:HGNC Symbol;Acc:HGNC:21016]	no	no	no	no
ENSG00000146216	50	100	6	TTBK1	43243481	43288258	tau tubulin kinase 1 [Source:HGNC Symbol;Acc:HGNC:19140]	no	no	no	no
ENSG00000146233	50	100	6	CYP39A1	46549580	46652830	cytochrome P450 family 39 subfamily A member 1 [Source:HGNC Symbol;Acc:HGNC:17449]	no	no	no	no
ENSG00000146386	50	100	6	ABRACL	139028745	139043302	ABRA C-terminal like [Source:HGNC Symbol;Acc:HGNC:21230]	no	no	no	no
ENSG00000146409	50	100	6	SLC18B1	132769370	132813339	solute carrier family 18 member B1 [Source:HGNC Symbol;Acc:HGNC:21573]	no	no	no	no
ENSG00000146410	50	100	6	MTFR2	136231024	136250335	mitochondrial fission regulator 2 [Source:HGNC Symbol;Acc:HGNC:21115]	no	no	no	no
ENSG00000146416	50	100	6	AIG1	143060496	143341058	androgen induced 1 [Source:HGNC Symbol;Acc:HGNC:21607]	no	no	no	no
ENSG00000146540	50	100	7	C7orf50	996986	1138260	chromosome 7 open reading frame 50 [Source:HGNC Symbol;Acc:HGNC:22421]	no	no	no	no
ENSG00000146592	50	100	7	CREB5	28299321	28825894	cAMP responsive element binding protein 5 [Source:HGNC Symbol;Acc:HGNC:16844]	no	no	no	no
ENSG00000146670	50	100	11	CDCA5	65066300	65084164	cell division cycle associated 5 [Source:HGNC Symbol;Acc:HGNC:14626]	no	no	no	no
ENSG00000146733	50	100	7	PSPH	56011051	56051604	phosphoserine phosphatase [Source:HGNC Symbol;Acc:HGNC:9577]	no	no	no	no
ENSG00000146858	50	100	7	ZC3HAV1L	139025706	139036042	zinc finger CCCH-type containing, antiviral 1 like [Source:HGNC Symbol;Acc:HGNC:22423]	no	no	no	no
ENSG00000146918	50	100	7	NCAPG2	158631169	158704804	non-SMC condensin II complex subunit G2 [Source:HGNC Symbol;Acc:HGNC:21904]	no	no	no	no
ENSG00000146938	50	100	X	NLGN4X	5840637	6228867	neuroligin 4 X-linked [Source:HGNC Symbol;Acc:HGNC:14287]	no	no	yes	no
ENSG00000147027	50	100	X	TMEM47	34627075	34657285	transmembrane protein 47 [Source:HGNC Symbol;Acc:HGNC:18515]	no	no	no	no
ENSG00000147041	50	100	X	SYTL5	38006553	38128819	synaptotagmin like 5 [Source:HGNC Symbol;Acc:HGNC:15589]	no	no	no	yes
ENSG00000147100	50	100	X	SLC16A2	74421493	74533917	solute carrier family 16 member 2 [Source:HGNC Symbol;Acc:HGNC:10923]	no	no	no	yes
ENSG00000147180	50	100	X	ZNF711	85243991	85273362	zinc finger protein 711 [Source:HGNC Symbol;Acc:HGNC:13128]	no	no	yes	no
ENSG00000147202	50	100	X	DIAPH2	96684712	97604997	diaphanous related formin 2 [Source:HGNC Symbol;Acc:HGNC:2877]	no	no	no	yes
ENSG00000147255	50	100	X	IGSF1	131273506	131578899	immunoglobulin superfamily member 1 [Source:HGNC Symbol;Acc:HGNC:5948]	no	no	no	yes
ENSG00000147364	50	100	8	FBXO25	406428	477967	F-box protein 25 [Source:HGNC Symbol;Acc:HGNC:13596]	no	no	no	no
ENSG00000147481	50	100	8	SNTG1	49909789	50796692	syntrophin gamma 1 [Source:HGNC Symbol;Acc:HGNC:13740]	no	no	no	no
ENSG00000147509	50	100	8	RGS20	53851795	53959303	regulator of G protein signaling 20 [Source:HGNC Symbol;Acc:HGNC:14600]	no	no	no	no
ENSG00000147526	50	100	8	TACC1	38728186	38853028	transforming acidic coiled-coil containing protein 1 [Source:HGNC Symbol;Acc:HGNC:11522]	no	no	no	no
ENSG00000147536	50	100	8	GINS4	41529218	41545030	GINS complex subunit 4 [Source:HGNC Symbol;Acc:HGNC:28226]	no	no	no	no
ENSG00000147642	50	100	8	SYBU	109573978	109691791	syntabulin [Source:HGNC Symbol;Acc:HGNC:26011]	no	no	no	no
ENSG00000147804	50	100	8	SLC39A4	144409742	144416844	solute carrier family 39 member 4 [Source:HGNC Symbol;Acc:HGNC:17129]	no	no	no	no
ENSG00000147872	50	100	9	PLIN2	19108375	19149290	perilipin 2 [Source:HGNC Symbol;Acc:HGNC:248]	no	no	no	no
ENSG00000147874	50	100	9	HAUS6	19053141	19102904	HAUS augmin like complex subunit 6 [Source:HGNC Symbol;Acc:HGNC:25948]	no	no	no	no
ENSG00000147883	50	100	9	CDKN2B	22002903	22009305	cyclin dependent kinase inhibitor 2B [Source:HGNC Symbol;Acc:HGNC:1788]	no	no	no	no
ENSG00000148200	50	100	9	NR6A1	124517275	124771311	nuclear receptor subfamily 6 group A member 1 [Source:HGNC Symbol;Acc:HGNC:7985]	no	no	no	no
ENSG00000148225	50	100	9	WDR31	113313222	113340298	WD repeat domain 31 [Source:HGNC Symbol;Acc:HGNC:21421]	no	no	no	no
ENSG00000148400	50	100	9	NOTCH1	136494433	136546048	notch receptor 1 [Source:HGNC Symbol;Acc:HGNC:7881]	no	no	no	no
ENSG00000148600	50	100	10	CDHR1	84194537	84219621	cadherin related family member 1 [Source:HGNC Symbol;Acc:HGNC:14550]	no	no	no	no
ENSG00000148798	50	100	10	INA	103277138	103290346	internexin neuronal intermediate filament protein alpha [Source:HGNC Symbol;Acc:HGNC:6057]	no	no	no	no
ENSG00000148814	50	100	10	LRRC27	132332154	132381508	leucine rich repeat containing 27 [Source:HGNC Symbol;Acc:HGNC:29346]	no	no	no	no
ENSG00000148835	50	100	10	TAF5	103367966	103389065	TATA-box binding protein associated factor 5 [Source:HGNC Symbol;Acc:HGNC:11539]	no	no	no	no
ENSG00000148848	50	100	10	ADAM12	126012381	126388477	ADAM metallopeptidase domain 12 [Source:HGNC Symbol;Acc:HGNC:190]	no	no	no	no
ENSG00000148908	50	100	10	RGS10	119499817	119542719	regulator of G protein signaling 10 [Source:HGNC Symbol;Acc:HGNC:9992]	no	no	no	no
ENSG00000148948	50	100	11	LRRC4C	40114203	41459773	leucine rich repeat containing 4C [Source:HGNC Symbol;Acc:HGNC:29317]	no	no	no	no
ENSG00000149054	50	100	11	ZNF215	6926404	7001004	zinc finger protein 215 [Source:HGNC Symbol;Acc:HGNC:13007]	no	no	no	no
ENSG00000149201	50	100	11	CCDC81	86374736	86423109	coiled-coil domain containing 81 [Source:HGNC Symbol;Acc:HGNC:26281]	no	no	no	no
ENSG00000149295	50	100	11	DRD2	113409605	113475691	dopamine receptor D2 [Source:HGNC Symbol;Acc:HGNC:3023]	no	no	no	no
ENSG00000149328	50	100	11	GLB1L2	134331874	134378341	galactosidase beta 1 like 2 [Source:HGNC Symbol;Acc:HGNC:25129]	no	no	no	no
ENSG00000149451	50	100	20	ADAM33	3667965	3682246	ADAM metallopeptidase domain 33 [Source:HGNC Symbol;Acc:HGNC:15478]	no	no	no	no
ENSG00000149485	50	100	11	FADS1	61799627	61829318	fatty acid desaturase 1 [Source:HGNC Symbol;Acc:HGNC:3574]	no	no	no	no
ENSG00000149503	50	100	11	INCENP	62123998	62153169	inner centromere protein [Source:HGNC Symbol;Acc:HGNC:6058]	no	no	no	no
ENSG00000149548	50	100	11	CCDC15	124954121	125041489	coiled-coil domain containing 15 [Source:HGNC Symbol;Acc:HGNC:25798]	no	no	no	no
ENSG00000149571	50	100	11	KIRREL3	126423358	127003460	kirre like nephrin family adhesion molecule 3 [Source:HGNC Symbol;Acc:HGNC:23204]	no	no	no	no
ENSG00000149926	50	100	16	TLCD3B	30024427	30052978	TLC domain containing 3B [Source:HGNC Symbol;Acc:HGNC:25295]	no	no	no	no
ENSG00000149948	50	100	12	HMGA2	65824460	65966291	high mobility group AT-hook 2 [Source:HGNC Symbol;Acc:HGNC:5009]	no	no	no	no
ENSG00000149970	50	100	X	CNKSR2	21372801	21654695	connector enhancer of kinase suppressor of Ras 2 [Source:HGNC Symbol;Acc:HGNC:19701]	no	no	yes	no
ENSG00000150347	50	100	10	ARID5B	61901684	62096944	AT-rich interaction domain 5B [Source:HGNC Symbol;Acc:HGNC:17362]	no	no	no	no
ENSG00000150630	50	100	4	VEGFC	176683538	176792922	vascular endothelial growth factor C [Source:HGNC Symbol;Acc:HGNC:12682]	no	no	no	no
ENSG00000150637	50	100	18	CD226	69831158	69961803	CD226 molecule [Source:HGNC Symbol;Acc:HGNC:16961]	no	no	no	no
ENSG00000150687	50	100	11	PRSS23	86791059	86952910	serine protease 23 [Source:HGNC Symbol;Acc:HGNC:14370]	no	no	no	no
ENSG00000150722	50	100	2	PPP1R1C	181954241	182131398	protein phosphatase 1 regulatory inhibitor subunit 1C [Source:HGNC Symbol;Acc:HGNC:14940]	no	no	no	no
ENSG00000150773	50	100	11	PIH1D2	112063218	112074274	PIH1 domain containing 2 [Source:HGNC Symbol;Acc:HGNC:25210]	no	no	no	no
ENSG00000151012	50	100	4	SLC7A11	138164097	138242349	solute carrier family 7 member 11 [Source:HGNC Symbol;Acc:HGNC:11059]	no	no	no	no
ENSG00000151023	50	100	10	ENKUR	24981979	25062279	enkurin, TRPC channel interacting protein [Source:HGNC Symbol;Acc:HGNC:28388]	no	no	no	no
ENSG00000151067	50	100	12	CACNA1C	1970772	2697950	calcium voltage-gated channel subunit alpha1 C [Source:HGNC Symbol;Acc:HGNC:1390]	no	no	no	no
ENSG00000151079	50	100	12	KCNA6	4809334	4813318	potassium voltage-gated channel subfamily A member 6 [Source:HGNC Symbol;Acc:HGNC:6225]	no	no	no	no
ENSG00000151503	50	100	11	NCAPD3	134150113	134225504	non-SMC condensin II complex subunit D3 [Source:HGNC Symbol;Acc:HGNC:28952]	no	no	no	no
ENSG00000151572	50	100	12	ANO4	100717526	101128641	anoctamin 4 [Source:HGNC Symbol;Acc:HGNC:23837]	no	no	no	no
ENSG00000151575	50	100	15	TEX9	56243971	56445997	testis expressed 9 [Source:HGNC Symbol;Acc:HGNC:29585]	no	no	no	no
ENSG00000151651	50	100	10	ADAM8	133262420	133276868	ADAM metallopeptidase domain 8 [Source:HGNC Symbol;Acc:HGNC:215]	no	no	no	no
ENSG00000151693	50	100	2	ASAP2	9206765	9405683	ArfGAP with SH3 domain, ankyrin repeat and PH domain 2 [Source:HGNC Symbol;Acc:HGNC:2721]	no	no	no	no
ENSG00000151726	50	100	4	ACSL1	184755595	184826818	acyl-CoA synthetase long chain family member 1 [Source:HGNC Symbol;Acc:HGNC:3569]	no	no	no	no
ENSG00000151948	50	100	12	GLT1D1	128853427	128984968	glycosyltransferase 1 domain containing 1 [Source:HGNC Symbol;Acc:HGNC:26483]	no	no	no	no
ENSG00000152056	50	100	2	AP1S3	223667680	223838027	adaptor related protein complex 1 subunit sigma 3 [Source:HGNC Symbol;Acc:HGNC:18971]	no	no	no	no
ENSG00000152076	50	100	2	CCDC74B	130139287	130145134	coiled-coil domain containing 74B [Source:HGNC Symbol;Acc:HGNC:25267]	no	no	no	no
ENSG00000152154	50	100	2	TMEM178A	39664982	39717963	transmembrane protein 178A [Source:HGNC Symbol;Acc:HGNC:28517]	no	no	no	no
ENSG00000152192	50	100	13	POU4F1	78598362	78603552	POU class 4 homeobox 1 [Source:HGNC Symbol;Acc:HGNC:9218]	no	no	no	no
ENSG00000152253	50	100	2	SPC25	168834132	168913371	SPC25 component of NDC80 kinetochore complex [Source:HGNC Symbol;Acc:HGNC:24031]	no	no	no	no
ENSG00000152256	50	100	2	PDK1	172555373	172608669	pyruvate dehydrogenase kinase 1 [Source:HGNC Symbol;Acc:HGNC:8809]	no	no	no	no
ENSG00000152377	50	100	5	SPOCK1	136975298	137598379	SPARC (osteonectin), cwcv and kazal like domains proteoglycan 1 [Source:HGNC Symbol;Acc:HGNC:11251]	no	no	no	no
ENSG00000152409	50	100	5	JMY	79236131	79327211	junction mediating and regulatory protein, p53 cofactor [Source:HGNC Symbol;Acc:HGNC:28916]	no	no	no	no
ENSG00000152582	50	100	5	SPEF2	35617844	35814611	sperm flagellar 2 [Source:HGNC Symbol;Acc:HGNC:26293]	no	no	no	no
ENSG00000152583	50	100	4	SPARCL1	87473335	87531061	SPARC like 1 [Source:HGNC Symbol;Acc:HGNC:11220]	no	no	no	no
ENSG00000152763	50	100	1	DNAI4	66812885	66924856	dynein axonemal intermediate chain 4 [Source:HGNC Symbol;Acc:HGNC:26252]	no	no	no	no
ENSG00000152953	50	100	4	STK32B	5051480	5500994	serine/threonine kinase 32B [Source:HGNC Symbol;Acc:HGNC:14217]	no	no	no	no
ENSG00000153012	50	100	4	LGI2	24998847	25030946	leucine rich repeat LGI family member 2 [Source:HGNC Symbol;Acc:HGNC:18710]	no	no	no	no
ENSG00000153044	50	100	5	CENPH	69189574	69210357	centromere protein H [Source:HGNC Symbol;Acc:HGNC:17268]	no	no	no	no
ENSG00000153071	50	100	5	DAB2	39371675	39462300	DAB adaptor protein 2 [Source:HGNC Symbol;Acc:HGNC:2662]	no	no	no	no
ENSG00000153094	50	100	2	BCL2L11	111119378	111168445	BCL2 like 11 [Source:HGNC Symbol;Acc:HGNC:994]	no	no	no	no
ENSG00000153157	50	100	6	SYCP2L	10886831	10979320	synaptonemal complex protein 2 like [Source:HGNC Symbol;Acc:HGNC:21537]	no	no	no	no
ENSG00000153237	50	100	2	CCDC148	158171073	158456753	coiled-coil domain containing 148 [Source:HGNC Symbol;Acc:HGNC:25191]	no	no	no	no
ENSG00000153246	50	100	2	PLA2R1	159932006	160062615	phospholipase A2 receptor 1 [Source:HGNC Symbol;Acc:HGNC:9042]	no	no	no	no
ENSG00000153291	50	100	6	SLC25A27	46652915	46678190	solute carrier family 25 member 27 [Source:HGNC Symbol;Acc:HGNC:21065]	no	no	no	no
ENSG00000153303	50	100	6	FRMD1	168053095	168101511	FERM domain containing 1 [Source:HGNC Symbol;Acc:HGNC:21240]	no	no	no	no
ENSG00000153404	50	100	5	PLEKHG4B	92168	189972	pleckstrin homology and RhoGEF domain containing G4B [Source:HGNC Symbol;Acc:HGNC:29399]	no	no	no	no
ENSG00000153551	50	100	3	CMTM7	32391698	32483067	CKLF like MARVEL transmembrane domain containing 7 [Source:HGNC Symbol;Acc:HGNC:19178]	no	no	no	no
ENSG00000153558	50	100	3	FBXL2	33277025	33403662	F-box and leucine rich repeat protein 2 [Source:HGNC Symbol;Acc:HGNC:13598]	no	no	no	no
ENSG00000153814	50	100	7	JAZF1	27830573	28180795	JAZF zinc finger 1 [Source:HGNC Symbol;Acc:HGNC:28917]	no	no	no	no
ENSG00000153879	50	100	19	CEBPG	33373685	33382686	CCAAT enhancer binding protein gamma [Source:HGNC Symbol;Acc:HGNC:1837]	no	no	no	no
ENSG00000153976	50	100	17	HS3ST3A1	13494032	13601929	heparan sulfate-glucosamine 3-sulfotransferase 3A1 [Source:HGNC Symbol;Acc:HGNC:5196]	no	no	no	no
ENSG00000154027	50	100	1	AK5	77282019	77559966	adenylate kinase 5 [Source:HGNC Symbol;Acc:HGNC:365]	no	no	no	no
ENSG00000154040	50	100	18	CABYR	24138987	24161600	calcium binding tyrosine phosphorylation regulated [Source:HGNC Symbol;Acc:HGNC:15569]	no	no	no	no
ENSG00000154127	50	100	11	UBASH3B	122655722	122814473	ubiquitin associated and SH3 domain containing B [Source:HGNC Symbol;Acc:HGNC:29884]	no	no	no	no
ENSG00000154310	50	100	3	TNIK	171058414	171460408	TRAF2 and NCK interacting kinase [Source:HGNC Symbol;Acc:HGNC:30765]	no	no	no	no
ENSG00000154359	50	100	8	LONRF1	12721906	12756073	LON peptidase N-terminal domain and ring finger 1 [Source:HGNC Symbol;Acc:HGNC:26302]	no	no	no	no
ENSG00000154447	50	100	4	SH3RF1	169094259	169270956	SH3 domain containing ring finger 1 [Source:HGNC Symbol;Acc:HGNC:17650]	no	no	no	no
ENSG00000154719	50	100	21	MRPL39	25585656	25607517	mitochondrial ribosomal protein L39 [Source:HGNC Symbol;Acc:HGNC:14027]	no	no	no	no
ENSG00000154783	50	100	3	FGD5	14810853	14934571	FYVE, RhoGEF and PH domain containing 5 [Source:HGNC Symbol;Acc:HGNC:19117]	no	no	no	no
ENSG00000154822	50	100	3	PLCL2	16802651	17090604	phospholipase C like 2 [Source:HGNC Symbol;Acc:HGNC:9064]	no	no	no	no
ENSG00000154839	50	100	18	SKA1	50375040	50394168	spindle and kinetochore associated complex subunit 1 [Source:HGNC Symbol;Acc:HGNC:28109]	no	no	no	no
ENSG00000154864	50	100	18	PIEZO2	10666483	11149569	piezo type mechanosensitive ion channel component 2 [Source:HGNC Symbol;Acc:HGNC:26270]	no	no	no	no
ENSG00000154898	50	100	17	CCDC144CP	20321150	20403557	coiled-coil domain containing 144C, pseudogene [Source:HGNC Symbol;Acc:HGNC:29073]	no	no	no	no
ENSG00000154914	50	100	17	USP43	9644698	9729687	ubiquitin specific peptidase 43 [Source:HGNC Symbol;Acc:HGNC:20072]	no	no	no	no
ENSG00000154917	50	100	3	RAB6B	133824235	133895882	RAB6B, member RAS oncogene family [Source:HGNC Symbol;Acc:HGNC:14902]	no	no	no	no
ENSG00000154920	50	100	17	EME1	50373220	50381483	essential meiotic structure-specific endonuclease 1 [Source:HGNC Symbol;Acc:HGNC:24965]	no	no	no	no
ENSG00000154930	50	100	20	ACSS1	25006230	25058980	acyl-CoA synthetase short chain family member 1 [Source:HGNC Symbol;Acc:HGNC:16091]	no	no	no	no
ENSG00000154945	50	100	17	ANKRD40	50693198	50707914	ankyrin repeat domain 40 [Source:HGNC Symbol;Acc:HGNC:28233]	no	no	no	no
ENSG00000154975	50	100	17	CA10	51630313	52160017	carbonic anhydrase 10 [Source:HGNC Symbol;Acc:HGNC:1369]	no	no	no	no
ENSG00000155011	50	100	4	DKK2	106921802	107283806	dickkopf WNT signaling pathway inhibitor 2 [Source:HGNC Symbol;Acc:HGNC:2892]	no	no	no	no
ENSG00000155093	50	100	7	PTPRN2	157539056	158587823	protein tyrosine phosphatase receptor type N2 [Source:HGNC Symbol;Acc:HGNC:9677]	no	no	no	no
ENSG00000155324	50	100	5	GRAMD2B	126360132	126496494	GRAM domain containing 2B [Source:HGNC Symbol;Acc:HGNC:24911]	no	no	no	no
ENSG00000155530	50	100	7	LRGUK	134127299	134264595	leucine rich repeats and guanylate kinase domain containing [Source:HGNC Symbol;Acc:HGNC:21964]	no	no	no	no
ENSG00000155657	50	100	2	TTN	178525989	178830802	titin [Source:HGNC Symbol;Acc:HGNC:12403]	no	no	no	no
ENSG00000155760	50	100	2	FZD7	202033855	202038441	frizzled class receptor 7 [Source:HGNC Symbol;Acc:HGNC:4045]	no	no	no	no
ENSG00000155761	50	100	1	SPAG17	117953590	118185228	sperm associated antigen 17 [Source:HGNC Symbol;Acc:HGNC:26620]	no	no	no	no
ENSG00000155846	50	100	5	PPARGC1B	149730298	149855022	PPARG coactivator 1 beta [Source:HGNC Symbol;Acc:HGNC:30022]	no	no	no	no
ENSG00000155850	50	100	5	SLC26A2	149960758	149993455	solute carrier family 26 member 2 [Source:HGNC Symbol;Acc:HGNC:10994]	no	no	no	no
ENSG00000156042	50	100	10	CFAP70	73253762	73358864	cilia and flagella associated protein 70 [Source:HGNC Symbol;Acc:HGNC:30726]	no	no	no	no
ENSG00000156050	50	100	14	FAM161B	73931501	73950414	FAM161 centrosomal protein B [Source:HGNC Symbol;Acc:HGNC:19854]	no	no	no	no
ENSG00000156299	50	100	21	TIAM1	31118416	31559977	TIAM Rac1 associated GEF 1 [Source:HGNC Symbol;Acc:HGNC:11805]	no	no	no	no
ENSG00000156345	50	100	9	CDK20	87966441	87974753	cyclin dependent kinase 20 [Source:HGNC Symbol;Acc:HGNC:21420]	no	no	no	no
ENSG00000156381	50	100	14	ANKRD9	102501767	102509799	ankyrin repeat domain 9 [Source:HGNC Symbol;Acc:HGNC:20096]	no	no	no	no
ENSG00000156463	50	100	5	SH3RF2	145936578	146081791	SH3 domain containing ring finger 2 [Source:HGNC Symbol;Acc:HGNC:26299]	no	no	no	no
ENSG00000156475	50	100	5	PPP2R2B	146580742	147084784	protein phosphatase 2 regulatory subunit Bbeta [Source:HGNC Symbol;Acc:HGNC:9305]	no	no	no	no
ENSG00000156509	50	100	8	FBXO43	100133351	100145817	F-box protein 43 [Source:HGNC Symbol;Acc:HGNC:28521]	no	no	no	no
ENSG00000156687	50	100	8	UNC5D	35235475	35796550	unc-5 netrin receptor D [Source:HGNC Symbol;Acc:HGNC:18634]	no	no	no	no
ENSG00000156689	50	100	11	GLYATL2	58834065	58904215	glycine-N-acyltransferase like 2 [Source:HGNC Symbol;Acc:HGNC:24178]	no	no	no	no
ENSG00000156787	50	100	8	TBC1D31	123041968	123152153	TBC1 domain family member 31 [Source:HGNC Symbol;Acc:HGNC:30888]	no	no	no	no
ENSG00000156802	50	100	8	ATAD2	123319850	123416350	ATPase family AAA domain containing 2 [Source:HGNC Symbol;Acc:HGNC:30123]	no	no	no	no
ENSG00000156970	50	100	15	BUB1B	40161023	40221123	BUB1 mitotic checkpoint serine/threonine kinase B [Source:HGNC Symbol;Acc:HGNC:1149]	no	no	no	no
ENSG00000157005	50	100	3	SST	187668912	187670394	somatostatin [Source:HGNC Symbol;Acc:HGNC:11329]	no	no	no	no
ENSG00000157168	50	100	8	NRG1	31639222	32855666	neuregulin 1 [Source:HGNC Symbol;Acc:HGNC:7997]	no	no	no	no
ENSG00000157214	50	100	7	STEAP2	90167590	90238137	STEAP2 metalloreductase [Source:HGNC Symbol;Acc:HGNC:17885]	no	no	no	no
ENSG00000157399	50	100	X	ARSL	2934045	2968475	arylsulfatase L [Source:HGNC Symbol;Acc:HGNC:719]	no	yes	no	no
ENSG00000157423	50	100	16	HYDIN	70802084	71230722	HYDIN axonemal central pair apparatus protein [Source:HGNC Symbol;Acc:HGNC:19368]	no	no	no	no
ENSG00000157445	50	100	3	CACNA2D3	54122547	55074557	calcium voltage-gated channel auxiliary subunit alpha2delta 3 [Source:HGNC Symbol;Acc:HGNC:15460]	no	no	no	no
ENSG00000157456	50	100	15	CCNB2	59105126	59125045	cyclin B2 [Source:HGNC Symbol;Acc:HGNC:1580]	no	no	no	no
ENSG00000157470	50	100	15	FAM81A	59372693	59523555	family with sequence similarity 81 member A [Source:HGNC Symbol;Acc:HGNC:28379]	no	no	no	no
ENSG00000157502	50	100	X	PWWP3B	106168305	106208956	PWWP domain containing 3B [Source:HGNC Symbol;Acc:HGNC:26583]	no	no	no	yes
ENSG00000157542	50	100	21	KCNJ6	37607373	38121345	potassium inwardly rectifying channel subfamily J member 6 [Source:HGNC Symbol;Acc:HGNC:6267]	no	no	no	no
ENSG00000157570	50	100	11	TSPAN18	44726465	44932423	tetraspanin 18 [Source:HGNC Symbol;Acc:HGNC:20660]	no	no	no	no
ENSG00000157734	50	100	15	SNX22	64151715	64157481	sorting nexin 22 [Source:HGNC Symbol;Acc:HGNC:16315]	no	no	no	no
ENSG00000157765	50	100	4	SLC34A2	25648011	25678748	solute carrier family 34 member 2 [Source:HGNC Symbol;Acc:HGNC:11020]	no	no	no	no
ENSG00000157992	50	100	2	KRTCAP3	27442366	27446481	keratinocyte associated protein 3 [Source:HGNC Symbol;Acc:HGNC:28943]	no	no	no	no
ENSG00000158008	50	100	1	EXTL1	26019884	26036464	exostosin like glycosyltransferase 1 [Source:HGNC Symbol;Acc:HGNC:3515]	no	no	no	no
ENSG00000158022	50	100	1	TRIM63	26051301	26068436	tripartite motif containing 63 [Source:HGNC Symbol;Acc:HGNC:16007]	no	no	no	no
ENSG00000158023	50	100	12	CFAP251	121918592	122003927	cilia and flagella associated protein 251 [Source:HGNC Symbol;Acc:HGNC:28506]	no	no	no	no
ENSG00000158055	50	100	1	GRHL3	24199558	24364482	grainyhead like transcription factor 3 [Source:HGNC Symbol;Acc:HGNC:25839]	no	no	no	no
ENSG00000158125	50	100	2	XDH	31334321	31414742	xanthine dehydrogenase [Source:HGNC Symbol;Acc:HGNC:12805]	no	no	no	no
ENSG00000158163	50	100	3	DZIP1L	138061990	138115818	DAZ interacting zinc finger protein 1 like [Source:HGNC Symbol;Acc:HGNC:26551]	no	no	no	no
ENSG00000158164	50	100	X	TMSB15A	102513682	102516739	thymosin beta 15A [Source:HGNC Symbol;Acc:HGNC:30744]	no	no	no	yes
ENSG00000158186	50	100	3	MRAS	138347648	138405534	muscle RAS oncogene homolog [Source:HGNC Symbol;Acc:HGNC:7227]	no	no	no	no
ENSG00000158201	50	100	18	ABHD3	21650901	21704780	abhydrolase domain containing 3, phospholipase [Source:HGNC Symbol;Acc:HGNC:18718]	no	no	no	no
ENSG00000158220	50	100	3	ESYT3	138434586	138481686	extended synaptotagmin 3 [Source:HGNC Symbol;Acc:HGNC:24295]	no	no	no	no
ENSG00000158286	50	100	1	RNF207	6205475	6221299	ring finger protein 207 [Source:HGNC Symbol;Acc:HGNC:32947]	no	no	no	no
ENSG00000158373	50	100	6	H2BC5	26158122	26171349	H2B clustered histone 5 [Source:HGNC Symbol;Acc:HGNC:4747]	no	no	no	no
ENSG00000158402	50	100	5	CDC25C	138285269	138338355	cell division cycle 25C [Source:HGNC Symbol;Acc:HGNC:1727]	no	no	no	no
ENSG00000158406	50	100	6	H4C8	26277609	26285638	H4 clustered histone 8 [Source:HGNC Symbol;Acc:HGNC:4788]	no	no	no	no
ENSG00000158467	50	100	7	AHCYL2	129225030	129430211	adenosylhomocysteinase like 2 [Source:HGNC Symbol;Acc:HGNC:22204]	no	no	no	no
ENSG00000158555	50	100	11	GDPD5	75434640	75525941	glycerophosphodiester phosphodiesterase domain containing 5 [Source:HGNC Symbol;Acc:HGNC:28804]	no	no	no	no
ENSG00000158769	50	100	1	F11R	160995211	161021343	F11 receptor [Source:HGNC Symbol;Acc:HGNC:14685]	no	no	no	no
ENSG00000159023	50	100	1	EPB41	28887091	29120046	erythrocyte membrane protein band 4.1 [Source:HGNC Symbol;Acc:HGNC:3377]	no	no	no	no
ENSG00000159055	50	100	21	MIS18A	32268228	32279049	MIS18 kinetochore protein A [Source:HGNC Symbol;Acc:HGNC:1286]	no	no	no	no
ENSG00000159164	50	100	1	SV2A	149903318	149917844	synaptic vesicle glycoprotein 2A [Source:HGNC Symbol;Acc:HGNC:20566]	no	no	no	no
ENSG00000159200	50	100	21	RCAN1	34513142	34615113	regulator of calcineurin 1 [Source:HGNC Symbol;Acc:HGNC:3040]	no	no	no	no
[truncated: 5,885 more rows]

## Sheet: Legend
Supplemental Data S5: Bootstrap analysis in iPSCs and NSCs. To obtain a good threshold to filter DEGs, and ensure the DEA results stem from the differences in karyotype and not due to clone variance we looped over the patients and randomly sampled a clone for each of the patients. To perform the analysis, we performed 50 iterations.
