# Supplementary material for: An iPSC-based model of 47,XYY Jacobs syndrome reveals a DNA methylation-independent transcriptional dysregulation shared with male X aneuploid cells
Source: Genome Res. 2025 Jul;35(7):1503–17. doi: 10.1101/gr.279716.124 (PMC12212075; doi:10.1101/gr.279716.124)
Supplement: Supplement 7 [file Supplemental_Data_S6_R3.xlsx]

## Sheet: Sheet1
Supplemental Data S6: Pearson correlation analysis in iPSCs. List of genes sensitive to Y chromosome number.
Gene	cor	pval	FDR	chromosome_name	hgnc_symbol	start_position	end_position	description	isPAR
ENSG00000000003	-0.634	3.5e-10	8.9e-09	X	TSPAN6	100627108	100639991	tetraspanin 6 [Source:HGNC Symbol;Acc:HGNC:11858]	no
ENSG00000000419	-0.307	0.006	0.015	20	DPM1	50934867	50959140	dolichyl-phosphate mannosyltransferase subunit 1, catalytic [Source:HGNC Symbol;Acc:HGNC:3005]	no
ENSG00000000457	0.044	0.703	0.771	1	SCYL3	169849631	169894267	SCY1 like pseudokinase 3 [Source:HGNC Symbol;Acc:HGNC:19285]	no
ENSG00000000460	0.018	0.872	0.905	1	C1orf112	169662007	169854080	chromosome 1 open reading frame 112 [Source:HGNC Symbol;Acc:HGNC:25565]	no
ENSG00000001036	-0.131	0.25	0.343	6	FUCA2	143494812	143511720	alpha-L-fucosidase 2 [Source:HGNC Symbol;Acc:HGNC:4008]	no
ENSG00000001084	-0.478	8.5e-06	5.3e-05	6	GCLC	53497341	53616970	glutamate-cysteine ligase catalytic subunit [Source:HGNC Symbol;Acc:HGNC:4311]	no
ENSG00000001167	0.126	0.268	0.363	6	NFYA	41072974	41102403	nuclear transcription factor Y subunit alpha [Source:HGNC Symbol;Acc:HGNC:7804]	no
ENSG00000001460	0.124	0.276	0.372	1	STPG1	24356999	24416934	sperm tail PG-rich repeat containing 1 [Source:HGNC Symbol;Acc:HGNC:28070]	no
ENSG00000001461	0.31	0.005	0.014	1	NIPAL3	24415802	24472976	NIPA like domain containing 3 [Source:HGNC Symbol;Acc:HGNC:25233]	no
ENSG00000001497	0.274	0.015	0.032	X	LAS1L	65438549	65534810	LAS1 like ribosome biogenesis factor [Source:HGNC Symbol;Acc:HGNC:25726]	no
ENSG00000001561	-0.126	0.27	0.366	6	ENPP4	46129989	46146688	ectonucleotide pyrophosphatase/phosphodiesterase 4 [Source:HGNC Symbol;Acc:HGNC:3359]	no
ENSG00000221970	0.88	1.2e-26	1.2e-23	7	OR2A1	144312419	144322737	olfactory receptor family 2 subfamily A member 1 [Source:HGNC Symbol;Acc:HGNC:8229]	no
ENSG00000001629	-0.093	0.413	0.513	7	ANKIB1	92245974	92401383	ankyrin repeat and IBR domain containing 1 [Source:HGNC Symbol;Acc:HGNC:22215]	no
ENSG00000001630	0.248	0.028	0.055	7	CYP51A1	92084987	92134803	cytochrome P450 family 51 subfamily A member 1 [Source:HGNC Symbol;Acc:HGNC:2649]	no
ENSG00000001631	-0.251	0.026	0.051	7	KRIT1	92197498	92246166	KRIT1 ankyrin repeat containing [Source:HGNC Symbol;Acc:HGNC:1573]	no
ENSG00000002016	0.137	0.229	0.32	12	RAD52	911736	990053	RAD52 homolog, DNA repair protein [Source:HGNC Symbol;Acc:HGNC:9824]	no
ENSG00000002330	0.02	0.859	0.894	11	BAD	64269830	64284704	BCL2 associated agonist of cell death [Source:HGNC Symbol;Acc:HGNC:936]	no
ENSG00000002549	-0.519	9.6e-07	8e-06	4	LAP3	17577198	17607972	leucine aminopeptidase 3 [Source:HGNC Symbol;Acc:HGNC:18449]	no
ENSG00000002586	0.691	1.8e-12	9e-11	X	CD99	2691187	2741309	CD99 molecule (Xg blood group) [Source:HGNC Symbol;Acc:HGNC:7082]	PAR1
ENSG00000002587	0.197	0.082	0.136	4	HS3ST1	11393150	11429564	heparan sulfate-glucosamine 3-sulfotransferase 1 [Source:HGNC Symbol;Acc:HGNC:5194]	no
ENSG00000002746	0.195	0.085	0.141	7	HECW1	43112629	43566001	HECT, C2 and WW domain containing E3 ubiquitin protein ligase 1 [Source:HGNC Symbol;Acc:HGNC:22195]	no
ENSG00000002834	-0.154	0.176	0.257	17	LASP1	38869859	38921770	LIM and SH3 protein 1 [Source:HGNC Symbol;Acc:HGNC:6513]	no
ENSG00000002919	0.202	0.074	0.125	17	SNX11	48103357	48123601	sorting nexin 11 [Source:HGNC Symbol;Acc:HGNC:14975]	no
ENSG00000003056	-0.106	0.354	0.454	12	M6PR	8940361	8949761	mannose-6-phosphate receptor, cation dependent [Source:HGNC Symbol;Acc:HGNC:6752]	no
ENSG00000003096	-0.213	0.059	0.103	X	KLHL13	117897813	118117340	kelch like family member 13 [Source:HGNC Symbol;Acc:HGNC:22931]	no
ENSG00000003147	0.203	0.073	0.124	7	ICA1	8113184	8262687	islet cell autoantigen 1 [Source:HGNC Symbol;Acc:HGNC:5343]	no
ENSG00000003249	0.017	0.885	0.914	16	DBNDD1	90004871	90019890	dysbindin domain containing 1 [Source:HGNC Symbol;Acc:HGNC:28455]	no
ENSG00000003393	-0.04	0.727	0.791	2	ALS2	201700267	201782112	alsin Rho guanine nucleotide exchange factor ALS2 [Source:HGNC Symbol;Acc:HGNC:443]	no
ENSG00000003400	-0.234	0.038	0.071	2	CASP10	201182872	201229428	caspase 10 [Source:HGNC Symbol;Acc:HGNC:1500]	no
ENSG00000003402	-0.403	0.00023	0.00091	2	CFLAR	201116154	201176687	CASP8 and FADD like apoptosis regulator [Source:HGNC Symbol;Acc:HGNC:1876]	no
ENSG00000140093	0.865	9.3e-25	8e-22	14	SERPINA10	94280460	94293268	serpin family A member 10 [Source:HGNC Symbol;Acc:HGNC:15996]	no
ENSG00000003509	-0.361	0.001	0.003	2	NDUFAF7	37231631	37253403	NADH:ubiquinone oxidoreductase complex assembly factor 7 [Source:HGNC Symbol;Acc:HGNC:28816]	no
ENSG00000003756	0.152	0.18	0.262	3	RBM5	50088919	50119021	RNA binding motif protein 5 [Source:HGNC Symbol;Acc:HGNC:9902]	no
ENSG00000003987	-0.028	0.807	0.854	8	MTMR7	17296794	17413528	myotubularin related protein 7 [Source:HGNC Symbol;Acc:HGNC:7454]	no
ENSG00000003989	0.117	0.304	0.402	8	SLC7A2	17497088	17570573	solute carrier family 7 member 2 [Source:HGNC Symbol;Acc:HGNC:11060]	no
ENSG00000004059	0.018	0.878	0.909	7	ARF5	127588386	127591700	ADP ribosylation factor 5 [Source:HGNC Symbol;Acc:HGNC:658]	no
ENSG00000004139	-0.089	0.434	0.532	17	SARM1	28364356	28404049	sterile alpha and TIR motif containing 1 [Source:HGNC Symbol;Acc:HGNC:17074]	no
ENSG00000004142	-0.358	0.001	0.004	17	POLDIP2	28346633	28357527	DNA polymerase delta interacting protein 2 [Source:HGNC Symbol;Acc:HGNC:23781]	no
ENSG00000187122	0.858	5.1e-24	3.9e-21	10	SLIT1	96998038	97185959	slit guidance ligand 1 [Source:HGNC Symbol;Acc:HGNC:11085]	no
ENSG00000004455	-0.39	0.00038	0.001	1	AK2	33007986	33080996	adenylate kinase 2 [Source:HGNC Symbol;Acc:HGNC:362]	no
ENSG00000004478	0.205	0.07	0.12	12	FKBP4	2794970	2805423	FKBP prolyl isomerase 4 [Source:HGNC Symbol;Acc:HGNC:3720]	no
ENSG00000004487	-0.391	0.00037	0.001	1	KDM1A	23019443	23083689	lysine demethylase 1A [Source:HGNC Symbol;Acc:HGNC:29079]	no
ENSG00000004534	0.105	0.356	0.456	3	RBM6	49940007	50100045	RNA binding motif protein 6 [Source:HGNC Symbol;Acc:HGNC:9903]	no
ENSG00000004660	0.41	0.00018	0.00072	17	CAMKK1	3860315	3894891	calcium/calmodulin dependent protein kinase kinase 1 [Source:HGNC Symbol;Acc:HGNC:1469]	no
ENSG00000004700	-0.279	0.013	0.029	12	RECQL	21468910	21501669	RecQ like helicase [Source:HGNC Symbol;Acc:HGNC:9948]	no
ENSG00000004766	-0.475	9.7e-06	5.9e-05	7	VPS50	93232340	93361123	VPS50 subunit of EARP/GARPII complex [Source:HGNC Symbol;Acc:HGNC:25956]	no
ENSG00000231443	0.851	2.9e-23	2.1e-20	3	ENSG00000231443	195937243	195938739	protein phosphatase 4, regulatory subunit 2 (PPP4R2) pseudogene	no
ENSG00000004779	-0.098	0.391	0.492	16	NDUFAB1	23581014	23596316	NADH:ubiquinone oxidoreductase subunit AB1 [Source:HGNC Symbol;Acc:HGNC:7694]	no
ENSG00000004864	0.05	0.665	0.739	7	SLC25A13	96120220	96322147	solute carrier family 25 member 13 [Source:HGNC Symbol;Acc:HGNC:10983]	no
ENSG00000004866	-0.205	0.07	0.12	7	ST7	116953238	117230176	suppression of tumorigenicity 7 [Source:HGNC Symbol;Acc:HGNC:11351]	no
ENSG00000004897	-0.157	0.167	0.246	17	CDC27	47117703	47189422	cell division cycle 27 [Source:HGNC Symbol;Acc:HGNC:1728]	no
ENSG00000004948	0.331	0.003	0.008	7	CALCR	93424486	93574730	calcitonin receptor [Source:HGNC Symbol;Acc:HGNC:1440]	no
ENSG00000004961	-0.126	0.267	0.363	X	HCCS	11111301	11123086	holocytochrome c synthase [Source:HGNC Symbol;Acc:HGNC:4837]	no
ENSG00000004975	-0.133	0.243	0.335	17	DVL2	7225342	7234517	dishevelled segment polarity protein 2 [Source:HGNC Symbol;Acc:HGNC:3086]	no
ENSG00000005007	-0.029	0.801	0.851	19	UPF1	18831959	18868230	UPF1 RNA helicase and ATPase [Source:HGNC Symbol;Acc:HGNC:9962]	no
ENSG00000005020	0.059	0.608	0.691	7	SKAP2	26667068	26995239	src kinase associated phosphoprotein 2 [Source:HGNC Symbol;Acc:HGNC:15687]	no
ENSG00000005022	-0.229	0.043	0.079	X	SLC25A5	119468422	119471396	solute carrier family 25 member 5 [Source:HGNC Symbol;Acc:HGNC:10991]	no
ENSG00000005059	-0.049	0.669	0.742	4	MCUB	109560209	109688719	mitochondrial calcium uniporter dominant negative subunit beta [Source:HGNC Symbol;Acc:HGNC:26076]	no
ENSG00000005075	0.136	0.232	0.324	7	POLR2J	102473128	102478922	RNA polymerase II subunit J [Source:HGNC Symbol;Acc:HGNC:9197]	no
ENSG00000005100	-0.073	0.524	0.617	17	DHX33	5440917	5468982	DEAH-box helicase 33 [Source:HGNC Symbol;Acc:HGNC:16718]	no
ENSG00000005156	-0.211	0.062	0.108	17	LIG3	34980512	35009743	DNA ligase 3 [Source:HGNC Symbol;Acc:HGNC:6600]	no
ENSG00000005175	-0.199	0.079	0.132	12	RPAP3	47661249	47706030	RNA polymerase II associated protein 3 [Source:HGNC Symbol;Acc:HGNC:26151]	no
ENSG00000005187	0.234	0.038	0.071	16	ACSM3	20610243	20797581	acyl-CoA synthetase medium chain family member 3 [Source:HGNC Symbol;Acc:HGNC:10522]	no
ENSG00000005189	-0.297	0.008	0.019	16	REXO5	20806429	20849665	RNA exonuclease 5 [Source:HGNC Symbol;Acc:HGNC:24661]	no
ENSG00000005194	-0.255	0.023	0.047	16	CIAPIN1	57428187	57447420	cytokine induced apoptosis inhibitor 1 [Source:HGNC Symbol;Acc:HGNC:28050]	no
ENSG00000005206	0.234	0.038	0.072	19	SPPL2B	2328615	2355095	signal peptide peptidase like 2B [Source:HGNC Symbol;Acc:HGNC:30627]	no
ENSG00000005238	0.294	0.009	0.02	9	ATOSB	35104112	35116341	atos homolog B [Source:HGNC Symbol;Acc:HGNC:25666]	no
ENSG00000005249	-0.005	0.963	0.972	7	PRKAR2B	107044705	107161811	protein kinase cAMP-dependent type II regulatory subunit beta [Source:HGNC Symbol;Acc:HGNC:9392]	no
ENSG00000005302	0.278	0.013	0.029	X	MSL3	11758159	11775772	MSL complex subunit 3 [Source:HGNC Symbol;Acc:HGNC:7370]	no
ENSG00000005339	0.029	0.802	0.851	16	CREBBP	3725054	3880713	CREB binding protein [Source:HGNC Symbol;Acc:HGNC:2348]	no
ENSG00000005379	0.204	0.071	0.121	17	TSPOAP1	58301228	58328795	TSPO associated protein 1 [Source:HGNC Symbol;Acc:HGNC:16831]	no
ENSG00000005436	-0.073	0.522	0.614	2	GCFC2	75652000	75710985	GC-rich sequence DNA-binding factor 2 [Source:HGNC Symbol;Acc:HGNC:1317]	no
ENSG00000005448	-0.39	0.00038	0.001	2	WDR54	74421678	74425755	WD repeat domain 54 [Source:HGNC Symbol;Acc:HGNC:25770]	no
ENSG00000005469	0.317	0.004	0.011	7	CROT	87345664	87399794	carnitine O-octanoyltransferase [Source:HGNC Symbol;Acc:HGNC:2366]	no
ENSG00000005483	-0.537	3.3e-07	3.3e-06	7	KMT2E	104940943	105115019	lysine methyltransferase 2E (inactive) [Source:HGNC Symbol;Acc:HGNC:18541]	no
ENSG00000005486	-0.426	9.2e-05	0.00041	7	RHBDD2	75842602	75888926	rhomboid domain containing 2 [Source:HGNC Symbol;Acc:HGNC:23082]	no
ENSG00000005513	0.323	0.004	0.01	16	SOX8	981770	986979	SRY-box transcription factor 8 [Source:HGNC Symbol;Acc:HGNC:11203]	no
ENSG00000005700	-0.114	0.316	0.415	6	IBTK	82169986	82247754	inhibitor of Bruton tyrosine kinase [Source:HGNC Symbol;Acc:HGNC:17853]	no
ENSG00000005801	-0.109	0.339	0.439	11	ZNF195	3339261	3379222	zinc finger protein 195 [Source:HGNC Symbol;Acc:HGNC:12986]	no
ENSG00000279278	0.848	6.2e-23	4.3e-20	22	ENSG00000279278	22264601	22273020	novel transcript	no
ENSG00000005812	-0.451	3.1e-05	0.00016	13	FBXL3	76992598	77027195	F-box and leucine rich repeat protein 3 [Source:HGNC Symbol;Acc:HGNC:13599]	no
ENSG00000005882	-0.386	0.00044	0.002	17	PDK2	50094737	50112152	pyruvate dehydrogenase kinase 2 [Source:HGNC Symbol;Acc:HGNC:8810]	no
ENSG00000005884	0.198	0.08	0.134	17	ITGA3	50055968	50090481	integrin subunit alpha 3 [Source:HGNC Symbol;Acc:HGNC:6139]	no
ENSG00000005889	-0.679	6.2e-12	2.7e-10	X	ZFX	24149173	24216255	zinc finger protein X-linked [Source:HGNC Symbol;Acc:HGNC:12869]	no
ENSG00000005893	-0.256	0.023	0.046	X	LAMP2	120426148	120469365	lysosomal associated membrane protein 2 [Source:HGNC Symbol;Acc:HGNC:6501]	no
ENSG00000005961	0.237	0.035	0.067	17	ITGA2B	44372180	44389649	integrin subunit alpha 2b [Source:HGNC Symbol;Acc:HGNC:6138]	no
ENSG00000006007	-0.604	3.7e-09	6.8e-08	16	GDE1	19501693	19522123	glycerophosphodiester phosphodiesterase 1 [Source:HGNC Symbol;Acc:HGNC:29644]	no
ENSG00000006015	-0.015	0.893	0.921	19	REX1BD	18588685	18592337	required for excision 1-B domain containing [Source:HGNC Symbol;Acc:HGNC:26098]	no
ENSG00000006016	0.006	0.955	0.966	19	CRLF1	18572220	18607741	cytokine receptor like factor 1 [Source:HGNC Symbol;Acc:HGNC:2364]	no
ENSG00000218226	0.839	4.4e-22	2.7e-19	6	TATDN2P2	158609706	158621636	TatD DNase domain containing 2 pseudogene 2 [Source:HGNC Symbol;Acc:HGNC:39255]	no
ENSG00000006042	-0.243	0.031	0.061	17	TMEM98	32927910	32945106	transmembrane protein 98 [Source:HGNC Symbol;Acc:HGNC:24529]	no
ENSG00000006047	-0.1	0.38	0.481	17	YBX2	7288263	7294639	Y-box binding protein 2 [Source:HGNC Symbol;Acc:HGNC:17948]	no
ENSG00000006062	-0.051	0.658	0.734	17	MAP3K14	45263119	45317029	mitogen-activated protein kinase kinase kinase 14 [Source:HGNC Symbol;Acc:HGNC:6853]	no
ENSG00000006071	0.181	0.111	0.175	11	ABCC8	17392498	17476894	ATP binding cassette subfamily C member 8 [Source:HGNC Symbol;Acc:HGNC:59]	no
ENSG00000006118	0.195	0.084	0.14	11	TMEM132A	60924460	60937159	transmembrane protein 132A [Source:HGNC Symbol;Acc:HGNC:31092]	no
ENSG00000006125	-0.519	9.6e-07	7.9e-06	17	AP2B1	35578046	35726413	adaptor related protein complex 2 subunit beta 1 [Source:HGNC Symbol;Acc:HGNC:563]	no
ENSG00000006194	-0.262	0.02	0.041	16	ZNF263	3283283	3301401	zinc finger protein 263 [Source:HGNC Symbol;Acc:HGNC:13056]	no
ENSG00000185905	0.838	6.4e-22	3.7e-19	16	C16orf54	29742463	29745990	chromosome 16 open reading frame 54 [Source:HGNC Symbol;Acc:HGNC:26649]	no
ENSG00000006282	0.042	0.716	0.782	17	SPATA20	50543058	50555852	spermatogenesis associated 20 [Source:HGNC Symbol;Acc:HGNC:26125]	no
ENSG00000006283	0.173	0.127	0.196	17	CACNA1G	50560715	50627474	calcium voltage-gated channel subunit alpha1 G [Source:HGNC Symbol;Acc:HGNC:1394]	no
ENSG00000006327	-0.309	0.006	0.014	16	TNFRSF12A	3018445	3022383	TNF receptor superfamily member 12A [Source:HGNC Symbol;Acc:HGNC:18152]	no
ENSG00000006432	0.034	0.763	0.821	14	MAP3K9	70722526	70809534	mitogen-activated protein kinase kinase kinase 9 [Source:HGNC Symbol;Acc:HGNC:6861]	no
ENSG00000006451	-0.638	2.5e-10	6.5e-09	7	RALA	39623565	39708120	RAS like proto-oncogene A [Source:HGNC Symbol;Acc:HGNC:9839]	no
ENSG00000006453	0.127	0.263	0.358	7	BAIAP2L1	98291650	98401090	BAR/IMD domain containing adaptor protein 2 like 1 [Source:HGNC Symbol;Acc:HGNC:21649]	no
ENSG00000006459	-0.097	0.395	0.495	7	KDM7A	140084746	140176983	lysine demethylase 7A [Source:HGNC Symbol;Acc:HGNC:22224]	no
ENSG00000006468	-0.437	5.6e-05	0.00027	7	ETV1	13891229	13991425	ETS variant transcription factor 1 [Source:HGNC Symbol;Acc:HGNC:3490]	no
ENSG00000006530	-0.233	0.038	0.072	7	AGK	141551278	141655244	acylglycerol kinase [Source:HGNC Symbol;Acc:HGNC:21869]	no
ENSG00000006576	-0.224	0.048	0.086	7	PHTF2	77798773	77957503	putative homeodomain transcription factor 2 [Source:HGNC Symbol;Acc:HGNC:13411]	no
ENSG00000006606	0.044	0.7	0.768	7	CCL26	75769533	75789896	C-C motif chemokine ligand 26 [Source:HGNC Symbol;Acc:HGNC:10625]	no
ENSG00000006607	0.335	0.003	0.007	2	FARP2	241356285	241494841	FERM, ARH/RhoGEF and pleckstrin domain protein 2 [Source:HGNC Symbol;Acc:HGNC:16460]	no
ENSG00000270231	0.838	6.1e-22	3.6e-19	1	NBPF8	120415035	120469676	NBPF member 8 [Source:HGNC Symbol;Acc:HGNC:31990]	no
ENSG00000006625	-0.346	0.002	0.005	7	GGCT	30496621	30504841	gamma-glutamylcyclotransferase [Source:HGNC Symbol;Acc:HGNC:21705]	no
ENSG00000006634	-0.347	0.002	0.005	7	DBF4	87876216	87909553	DBF4 zinc finger [Source:HGNC Symbol;Acc:HGNC:17364]	no
ENSG00000006652	-0.206	0.068	0.117	7	IFRD1	112422887	112481017	interferon related developmental regulator 1 [Source:HGNC Symbol;Acc:HGNC:5456]	no
ENSG00000006695	-0.298	0.008	0.018	17	COX10	14069490	14231736	cytochrome c oxidase assembly factor heme A:farnesyltransferase COX10 [Source:HGNC Symbol;Acc:HGNC:2260]	no
ENSG00000006704	-0.084	0.463	0.559	7	GTF2IRD1	74453790	74602605	GTF2I repeat domain containing 1 [Source:HGNC Symbol;Acc:HGNC:4661]	no
ENSG00000006712	-0.266	0.018	0.038	19	PAF1	39385629	39391154	PAF1 homolog, Paf1/RNA polymerase II complex component [Source:HGNC Symbol;Acc:HGNC:25459]	no
ENSG00000006715	-0.293	0.009	0.021	7	VPS41	38722974	38932394	VPS41 subunit of HOPS complex [Source:HGNC Symbol;Acc:HGNC:12713]	no
ENSG00000006740	0.226	0.045	0.083	17	ARHGAP44	12789498	12991643	Rho GTPase activating protein 44 [Source:HGNC Symbol;Acc:HGNC:29096]	no
ENSG00000006744	0.037	0.747	0.808	17	ELAC2	12991612	13018065	elaC ribonuclease Z 2 [Source:HGNC Symbol;Acc:HGNC:14198]	no
ENSG00000006747	-0.175	0.123	0.191	7	SCIN	12570577	12660182	scinderin [Source:HGNC Symbol;Acc:HGNC:21695]	no
ENSG00000006756	-0.106	0.352	0.452	X	ARSD	2903972	2929349	arylsulfatase D [Source:HGNC Symbol;Acc:HGNC:717]	no
ENSG00000006757	-0.674	1e-11	4.1e-10	X	PNPLA4	7898247	7927739	patatin like phospholipase domain containing 4 [Source:HGNC Symbol;Acc:HGNC:24887]	no
ENSG00000006831	-0.548	1.7e-07	1.9e-06	12	ADIPOR2	1688574	1788674	adiponectin receptor 2 [Source:HGNC Symbol;Acc:HGNC:24041]	no
ENSG00000007047	0.135	0.235	0.328	19	MARK4	45079288	45305284	microtubule affinity regulating kinase 4 [Source:HGNC Symbol;Acc:HGNC:13538]	no
ENSG00000007062	-0.221	0.05	0.09	4	PROM1	15963076	16084378	prominin 1 [Source:HGNC Symbol;Acc:HGNC:9454]	no
ENSG00000183889	0.837	6.9e-22	3.8e-19	16	ENSG00000183889	16317444	16350590	nuclear pore complex interacting protein family, member A9 [Source:NCBI gene (formerly Entrezgene);Acc:105376752]	no
ENSG00000007168	-0.508	1.8e-06	1.3e-05	17	PAFAH1B1	2593210	2685615	platelet activating factor acetylhydrolase 1b regulatory subunit 1 [Source:HGNC Symbol;Acc:HGNC:8574]	no
ENSG00000166770	0.831	2.9e-21	1.3e-18	19	ZNF667-AS1	56477250	56504362	ZNF667 antisense RNA 1 (head to head) [Source:HGNC Symbol;Acc:HGNC:44321]	no
ENSG00000238278	0.821	2e-20	7.7e-18	3	ALG1L6P	75415070	75422143	ALG1 like 6, pseudogene [Source:HGNC Symbol;Acc:HGNC:44375]	no
ENSG00000007237	-0.047	0.682	0.754	17	GAS7	9910606	10198606	growth arrest specific 7 [Source:HGNC Symbol;Acc:HGNC:4169]	no
ENSG00000007255	-0.055	0.632	0.711	19	TRAPPC6A	45162928	45178237	trafficking protein particle complex subunit 6A [Source:HGNC Symbol;Acc:HGNC:23069]	no
ENSG00000007264	-0.018	0.874	0.906	19	MATK	3777970	3802129	megakaryocyte-associated tyrosine kinase [Source:HGNC Symbol;Acc:HGNC:6906]	no
ENSG00000007314	0.373	0.00071	0.002	17	SCN4A	63938554	63972918	sodium voltage-gated channel alpha subunit 4 [Source:HGNC Symbol;Acc:HGNC:10591]	no
ENSG00000007341	-0.217	0.055	0.097	1	ST7L	112523514	112620825	suppression of tumorigenicity 7 like [Source:HGNC Symbol;Acc:HGNC:18441]	no
ENSG00000007376	0.141	0.215	0.304	16	RPUSD1	784974	788397	RNA pseudouridine synthase domain containing 1 [Source:HGNC Symbol;Acc:HGNC:14173]	no
ENSG00000007384	0.384	0.00048	0.002	16	RHBDF1	58059	76355	rhomboid 5 homolog 1 [Source:HGNC Symbol;Acc:HGNC:20561]	no
ENSG00000007392	0.089	0.438	0.535	16	LUC7L	188969	229463	LUC7 like [Source:HGNC Symbol;Acc:HGNC:6723]	no
ENSG00000007402	-0.132	0.246	0.339	3	CACNA2D2	50362613	50504244	calcium voltage-gated channel auxiliary subunit alpha2delta 2 [Source:HGNC Symbol;Acc:HGNC:1400]	no
ENSG00000007516	-0.009	0.937	0.954	16	BAIAP3	1333638	1349441	BAI1 associated protein 3 [Source:HGNC Symbol;Acc:HGNC:948]	no
ENSG00000007520	0.014	0.899	0.925	16	TSR3	1349240	1351878	TSR3 ribosome maturation factor [Source:HGNC Symbol;Acc:HGNC:14175]	no
ENSG00000007541	0.098	0.388	0.489	16	PIGQ	566995	584109	phosphatidylinositol glycan anchor biosynthesis class Q [Source:HGNC Symbol;Acc:HGNC:14135]	no
ENSG00000007545	0.393	0.00034	0.001	16	CRAMP1	1612337	1677908	cramped chromatin regulator homolog 1 [Source:HGNC Symbol;Acc:HGNC:14122]	no
ENSG00000007866	-0.104	0.361	0.461	6	TEAD3	35473597	35497079	TEA domain transcription factor 3 [Source:HGNC Symbol;Acc:HGNC:11716]	no
ENSG00000007923	0.336	0.002	0.007	1	DNAJC11	6634168	6701924	DnaJ heat shock protein family (Hsp40) member C11 [Source:HGNC Symbol;Acc:HGNC:25570]	no
ENSG00000007944	0.047	0.679	0.751	6	MYLIP	16129086	16148248	myosin regulatory light chain interacting protein [Source:HGNC Symbol;Acc:HGNC:21155]	no
ENSG00000007968	0.131	0.249	0.343	1	E2F2	23506438	23531233	E2F transcription factor 2 [Source:HGNC Symbol;Acc:HGNC:3114]	no
ENSG00000008018	-0.205	0.07	0.119	6	PSMB1	170535120	170553307	proteasome 20S subunit beta 1 [Source:HGNC Symbol;Acc:HGNC:9537]	no
ENSG00000008056	0.179	0.115	0.181	X	SYN1	47571901	47619857	synapsin I [Source:HGNC Symbol;Acc:HGNC:11494]	no
ENSG00000008083	-0.501	2.6e-06	1.8e-05	6	JARID2	15246069	15522042	jumonji and AT-rich interaction domain containing 2 [Source:HGNC Symbol;Acc:HGNC:6196]	no
ENSG00000008086	-0.285	0.011	0.025	X	CDKL5	18425583	18653629	cyclin dependent kinase like 5 [Source:HGNC Symbol;Acc:HGNC:11411]	no
ENSG00000008130	0.387	0.00043	0.002	1	NADK	1751232	1780457	NAD kinase [Source:HGNC Symbol;Acc:HGNC:29831]	no
ENSG00000008256	0.131	0.249	0.343	7	CYTH3	6161776	6272644	cytohesin 3 [Source:HGNC Symbol;Acc:HGNC:9504]	no
ENSG00000008277	0.263	0.019	0.04	7	ADAM22	87934143	88202889	ADAM metallopeptidase domain 22 [Source:HGNC Symbol;Acc:HGNC:201]	no
ENSG00000008282	-0.39	0.00038	0.001	7	SYPL1	106090505	106112589	synaptophysin like 1 [Source:HGNC Symbol;Acc:HGNC:11507]	no
ENSG00000008283	0.157	0.167	0.247	17	CYB561	63432304	63446354	cytochrome b561 [Source:HGNC Symbol;Acc:HGNC:2571]	no
ENSG00000008294	-0.051	0.658	0.734	17	SPAG9	50962174	51120868	sperm associated antigen 9 [Source:HGNC Symbol;Acc:HGNC:14524]	no
ENSG00000008300	0.148	0.192	0.277	3	CELSR3	48636463	48662886	cadherin EGF LAG seven-pass G-type receptor 3 [Source:HGNC Symbol;Acc:HGNC:3230]	no
ENSG00000008311	0.2	0.077	0.13	7	AASS	122064583	122144308	aminoadipate-semialdehyde synthase [Source:HGNC Symbol;Acc:HGNC:17366]	no
ENSG00000008323	0.172	0.129	0.199	12	PLEKHG6	6310436	6328506	pleckstrin homology and RhoGEF domain containing G6 [Source:HGNC Symbol;Acc:HGNC:25562]	no
ENSG00000008324	0.089	0.436	0.534	3	SS18L2	42581840	42596934	SS18 like 2 [Source:HGNC Symbol;Acc:HGNC:15593]	no
ENSG00000008382	0.399	0.00027	0.001	19	MPND	4343527	4360086	MPN domain containing [Source:HGNC Symbol;Acc:HGNC:25934]	no
ENSG00000008394	-0.225	0.046	0.085	12	MGST1	16347142	16609259	microsomal glutathione S-transferase 1 [Source:HGNC Symbol;Acc:HGNC:7061]	no
ENSG00000008405	-0.193	0.088	0.144	12	CRY1	106991364	107093549	cryptochrome circadian regulator 1 [Source:HGNC Symbol;Acc:HGNC:2384]	no
ENSG00000008441	0.017	0.88	0.911	19	NFIX	12995475	13098796	nuclear factor I X [Source:HGNC Symbol;Acc:HGNC:7788]	no
ENSG00000008513	0.435	6.3e-05	0.0003	8	ST3GAL1	133454848	133571940	ST3 beta-galactoside alpha-2,3-sialyltransferase 1 [Source:HGNC Symbol;Acc:HGNC:10862]	no
ENSG00000008516	0.057	0.619	0.7	16	MMP25	3046062	3060726	matrix metallopeptidase 25 [Source:HGNC Symbol;Acc:HGNC:14246]	no
ENSG00000008517	0.175	0.122	0.19	16	IL32	3065297	3082192	interleukin 32 [Source:HGNC Symbol;Acc:HGNC:16830]	no
ENSG00000144834	0.818	3.3e-20	1.3e-17	3	TAGLN3	111998739	112013887	transgelin 3 [Source:HGNC Symbol;Acc:HGNC:29868]	no
ENSG00000008838	0.006	0.959	0.969	17	MED24	40019097	40061215	mediator complex subunit 24 [Source:HGNC Symbol;Acc:HGNC:22963]	no
ENSG00000008853	-0.091	0.424	0.523	8	RHOBTB2	22987417	23020509	Rho related BTB domain containing 2 [Source:HGNC Symbol;Acc:HGNC:18756]	no
ENSG00000008869	-0.315	0.005	0.012	2	HEATR5B	36968383	37084372	HEAT repeat containing 5B [Source:HGNC Symbol;Acc:HGNC:29273]	no
ENSG00000008952	-0.533	4.2e-07	3.9e-06	3	SEC62	169966635	169998373	SEC62 homolog, preprotein translocation factor [Source:HGNC Symbol;Acc:HGNC:11846]	no
ENSG00000008988	-0.411	0.00017	0.0007	8	RPS20	56067254	56074510	ribosomal protein S20 [Source:HGNC Symbol;Acc:HGNC:10405]	no
ENSG00000009307	-0.27	0.016	0.035	1	CSDE1	114716913	114758676	cold shock domain containing E1 [Source:HGNC Symbol;Acc:HGNC:29905]	no
ENSG00000009335	-0.23	0.041	0.077	7	UBE3C	157138916	157269370	ubiquitin protein ligase E3C [Source:HGNC Symbol;Acc:HGNC:16803]	no
ENSG00000009413	0.101	0.375	0.476	6	REV3L	111299028	111483715	REV3 like, DNA directed polymerase zeta catalytic subunit [Source:HGNC Symbol;Acc:HGNC:9968]	no
ENSG00000009694	0.233	0.039	0.073	X	TENM1	124375903	125204312	teneurin transmembrane protein 1 [Source:HGNC Symbol;Acc:HGNC:8117]	no
ENSG00000009709	0.201	0.075	0.127	1	PAX7	18630846	18748866	paired box 7 [Source:HGNC Symbol;Acc:HGNC:8621]	no
ENSG00000009780	-0.547	1.9e-07	2e-06	1	FAM76A	27725961	27763116	family with sequence similarity 76 member A [Source:HGNC Symbol;Acc:HGNC:28530]	no
ENSG00000009830	0.158	0.163	0.241	14	POMT2	77274956	77320883	protein O-mannosyltransferase 2 [Source:HGNC Symbol;Acc:HGNC:19743]	no
ENSG00000009844	-0.553	1.2e-07	1.4e-06	6	VTA1	142147162	142224685	vesicle trafficking 1 [Source:HGNC Symbol;Acc:HGNC:20954]	no
ENSG00000009950	0.465	1.6e-05	9e-05	7	MLXIPL	73593194	73624543	MLX interacting protein like [Source:HGNC Symbol;Acc:HGNC:12744]	no
ENSG00000009954	-0.355	0.001	0.004	7	BAZ1B	73440406	73522293	bromodomain adjacent to zinc finger domain 1B [Source:HGNC Symbol;Acc:HGNC:961]	no
ENSG00000010017	-0.493	3.9e-06	2.7e-05	6	RANBP9	13621498	13711835	RAN binding protein 9 [Source:HGNC Symbol;Acc:HGNC:13727]	no
ENSG00000010072	-0.104	0.36	0.46	1	SPRTN	231337104	231355023	SprT-like N-terminal domain [Source:HGNC Symbol;Acc:HGNC:25356]	no
ENSG00000010165	-0.07	0.538	0.63	1	METTL13	171781660	171814023	methyltransferase 13, eEF1A lysine and N-terminal methyltransferase [Source:HGNC Symbol;Acc:HGNC:24248]	no
ENSG00000010219	0.462	1.8e-05	9.9e-05	12	DYRK4	4562208	4615302	dual specificity tyrosine phosphorylation regulated kinase 4 [Source:HGNC Symbol;Acc:HGNC:3095]	no
ENSG00000010244	0.014	0.905	0.928	17	ZNF207	32350132	32381885	zinc finger protein 207 [Source:HGNC Symbol;Acc:HGNC:12998]	no
ENSG00000010256	0.075	0.508	0.602	3	UQCRC1	48599002	48610976	ubiquinol-cytochrome c reductase core protein 1 [Source:HGNC Symbol;Acc:HGNC:12585]	no
ENSG00000010270	-0.421	0.00011	0.00048	7	STARD3NL	38178245	38230670	STARD3 N-terminal like [Source:HGNC Symbol;Acc:HGNC:19169]	no
ENSG00000010278	-0.42	0.00012	0.00051	12	CD9	6199715	6238271	CD9 molecule [Source:HGNC Symbol;Acc:HGNC:1709]	no
ENSG00000010292	0.193	0.088	0.145	12	NCAPD2	6493356	6531955	non-SMC condensin I complex subunit D2 [Source:HGNC Symbol;Acc:HGNC:24305]	no
ENSG00000010295	0.197	0.082	0.136	12	IFFO1	6538961	6556073	intermediate filament family orphan 1 [Source:HGNC Symbol;Acc:HGNC:24970]	no
ENSG00000244932	0.817	4.6e-20	1.7e-17	3	ENSG00000244932	129381298	129394149	pseudogene similar to intraflagellar transport 122 homolog	no
ENSG00000010319	-0.291	0.009	0.021	3	SEMA3G	52433035	52445103	semaphorin 3G [Source:HGNC Symbol;Acc:HGNC:30400]	no
ENSG00000010322	-0.247	0.028	0.056	3	NISCH	52455118	52493068	nischarin [Source:HGNC Symbol;Acc:HGNC:18006]	no
ENSG00000010327	0.443	4.4e-05	0.00022	3	STAB1	52495338	52524495	stabilin 1 [Source:HGNC Symbol;Acc:HGNC:18628]	no
ENSG00000010361	0.423	0.0001	0.00044	19	FUZ	49806866	49817376	fuzzy planar cell polarity protein [Source:HGNC Symbol;Acc:HGNC:26219]	no
ENSG00000010404	0.009	0.939	0.955	X	IDS	149476988	149521096	iduronate 2-sulfatase [Source:HGNC Symbol;Acc:HGNC:5389]	no
ENSG00000010539	0.205	0.069	0.118	16	ZNF200	3222325	3236221	zinc finger protein 200 [Source:HGNC Symbol;Acc:HGNC:12993]	no
ENSG00000010610	0.23	0.042	0.077	12	CD4	6786858	6820799	CD4 molecule [Source:HGNC Symbol;Acc:HGNC:1678]	no
ENSG00000010626	-0.191	0.092	0.15	12	LRRC23	6873569	6914241	leucine rich repeat containing 23 [Source:HGNC Symbol;Acc:HGNC:19138]	no
ENSG00000010704	0.415	0.00014	0.0006	6	HFE	26087281	26098343	homeostatic iron regulator [Source:HGNC Symbol;Acc:HGNC:4886]	no
ENSG00000160200	0.815	5.9e-20	2.1e-17	21	CBS	43053191	43076943	cystathionine beta-synthase [Source:HGNC Symbol;Acc:HGNC:1550]	no
ENSG00000010810	-0.135	0.235	0.328	6	FYN	111660332	111873452	FYN proto-oncogene, Src family tyrosine kinase [Source:HGNC Symbol;Acc:HGNC:4037]	no
ENSG00000010818	0.409	0.00018	0.00074	6	HIVEP2	142751469	142956698	HIVEP zinc finger 2 [Source:HGNC Symbol;Acc:HGNC:4921]	no
ENSG00000011007	0.018	0.872	0.905	1	ELOA	23743448	23762059	elongin A [Source:HGNC Symbol;Acc:HGNC:11620]	no
ENSG00000011009	0.354	0.001	0.004	1	LYPLA2	23791145	23795539	lysophospholipase 2 [Source:HGNC Symbol;Acc:HGNC:6738]	no
ENSG00000011021	0.17	0.134	0.205	1	CLCN6	11806096	11848079	chloride voltage-gated channel 6 [Source:HGNC Symbol;Acc:HGNC:2024]	no
ENSG00000011028	0.143	0.208	0.295	17	MRC2	62627670	62693597	mannose receptor C type 2 [Source:HGNC Symbol;Acc:HGNC:16875]	no
ENSG00000011105	0.173	0.126	0.196	12	TSPAN9	3077355	3286564	tetraspanin 9 [Source:HGNC Symbol;Acc:HGNC:21640]	no
ENSG00000011114	0.119	0.298	0.396	14	BTBD7	93237550	93333092	BTB domain containing 7 [Source:HGNC Symbol;Acc:HGNC:18269]	no
ENSG00000011132	0.412	0.00016	0.00067	19	APBA3	3750772	3761692	amyloid beta precursor protein binding family A member 3 [Source:HGNC Symbol;Acc:HGNC:580]	no
ENSG00000011143	-0.187	0.098	0.158	17	MKS1	58205441	58219605	MKS transition zone complex subunit 1 [Source:HGNC Symbol;Acc:HGNC:7121]	no
ENSG00000011198	-0.271	0.016	0.034	3	ABHD5	43690108	43734371	abhydrolase domain containing 5, lysophosphatidic acid acyltransferase [Source:HGNC Symbol;Acc:HGNC:21396]	no
ENSG00000011201	-0.444	4.2e-05	0.0002	X	ANOS1	8528874	8732137	anosmin 1 [Source:HGNC Symbol;Acc:HGNC:6211]	no
ENSG00000011243	0.208	0.066	0.114	19	AKAP8L	15380050	15419141	A-kinase anchoring protein 8 like [Source:HGNC Symbol;Acc:HGNC:29857]	no
ENSG00000011258	-0.235	0.037	0.071	17	MBTD1	51177425	51260163	mbt domain containing 1 [Source:HGNC Symbol;Acc:HGNC:19866]	no
ENSG00000011260	-0.542	2.5e-07	2.6e-06	17	UTP18	51260546	51297936	UTP18 small subunit processome component [Source:HGNC Symbol;Acc:HGNC:24274]	no
ENSG00000011275	-0.108	0.344	0.444	7	RNF216	5620047	5781696	ring finger protein 216 [Source:HGNC Symbol;Acc:HGNC:21698]	no
ENSG00000011295	-0.542	2.5e-07	2.5e-06	17	TTC19	15999784	16045015	tetratricopeptide repeat domain 19 [Source:HGNC Symbol;Acc:HGNC:26006]	no
ENSG00000011304	0.11	0.336	0.436	19	PTBP1	797075	812327	polypyrimidine tract binding protein 1 [Source:HGNC Symbol;Acc:HGNC:9583]	no
ENSG00000011332	0.004	0.971	0.978	19	DPF1	38211006	38229714	double PHD fingers 1 [Source:HGNC Symbol;Acc:HGNC:20225]	no
ENSG00000011347	0.169	0.137	0.208	11	SYT7	61513714	61581148	synaptotagmin 7 [Source:HGNC Symbol;Acc:HGNC:11514]	no
ENSG00000011376	0.134	0.238	0.331	3	LARS2	45388561	45554726	leucyl-tRNA synthetase 2, mitochondrial [Source:HGNC Symbol;Acc:HGNC:17095]	no
ENSG00000011405	-0.071	0.536	0.628	11	PIK3C2A	17077730	17207986	phosphatidylinositol-4-phosphate 3-kinase catalytic subunit type 2 alpha [Source:HGNC Symbol;Acc:HGNC:8971]	no
ENSG00000011422	0.162	0.155	0.231	19	PLAUR	43646095	43670547	plasminogen activator, urokinase receptor [Source:HGNC Symbol;Acc:HGNC:9053]	no
ENSG00000011426	-0.311	0.005	0.013	7	ANLN	36389821	36453791	anillin, actin binding protein [Source:HGNC Symbol;Acc:HGNC:14082]	no
ENSG00000011451	0.365	0.00095	0.003	19	WIZ	15419978	15449956	WIZ zinc finger [Source:HGNC Symbol;Acc:HGNC:30917]	no
ENSG00000011454	-0.195	0.085	0.141	9	RABGAP1	122940833	123104866	RAB GTPase activating protein 1 [Source:HGNC Symbol;Acc:HGNC:17155]	no
ENSG00000288596	0.813	9.3e-20	3.2e-17	8	C8orf44	66667615	66685564	chromosome 8 putative open reading frame 44 [Source:HGNC Symbol;Acc:HGNC:25646]	no
ENSG00000011485	0.396	0.00031	0.001	19	PPP5C	46347087	46392981	protein phosphatase 5 catalytic subunit [Source:HGNC Symbol;Acc:HGNC:9322]	no
ENSG00000011523	-0.283	0.012	0.026	2	CEP68	65056354	65087004	centrosomal protein 68 [Source:HGNC Symbol;Acc:HGNC:29076]	no
ENSG00000011566	-0.153	0.179	0.26	2	MAP4K3	39249266	39437301	mitogen-activated protein kinase kinase kinase kinase 3 [Source:HGNC Symbol;Acc:HGNC:6865]	no
ENSG00000011638	-0.096	0.4	0.5	16	LDAF1	21158377	21180616	lipid droplet assembly factor 1 [Source:HGNC Symbol;Acc:HGNC:30136]	no
ENSG00000011677	-0.268	0.017	0.036	X	GABRA3	152166234	152451315	gamma-aminobutyric acid type A receptor subunit alpha3 [Source:HGNC Symbol;Acc:HGNC:4077]	no
ENSG00000012048	-0.024	0.832	0.874	17	BRCA1	43044295	43170245	BRCA1 DNA repair associated [Source:HGNC Symbol;Acc:HGNC:1100]	no
ENSG00000012061	0.303	0.007	0.016	19	ERCC1	45407334	45478828	ERCC excision repair 1, endonuclease non-catalytic subunit [Source:HGNC Symbol;Acc:HGNC:3433]	no
ENSG00000012171	0.067	0.56	0.65	3	SEMA3B	50267558	50277546	semaphorin 3B [Source:HGNC Symbol;Acc:HGNC:10724]	no
ENSG00000012174	-0.151	0.185	0.268	X	MBTPS2	21839617	21885423	membrane bound transcription factor peptidase, site 2 [Source:HGNC Symbol;Acc:HGNC:15455]	no
ENSG00000012211	0.645	1.4e-10	4.1e-09	X	PRICKLE3	49174802	49186528	prickle planar cell polarity protein 3 [Source:HGNC Symbol;Acc:HGNC:6645]	no
ENSG00000012232	-0.148	0.192	0.277	8	EXTL3	28600469	28756561	exostosin like glycosyltransferase 3 [Source:HGNC Symbol;Acc:HGNC:3518]	no
ENSG00000012660	-0.22	0.051	0.091	6	ELOVL5	53267398	53349179	ELOVL fatty acid elongase 5 [Source:HGNC Symbol;Acc:HGNC:21308]	no
ENSG00000012817	0.933	5.2e-36	6.5e-33	Y	KDM5D	19703865	19744939	lysine demethylase 5D [Source:HGNC Symbol;Acc:HGNC:11115]	no
ENSG00000012822	-0.083	0.467	0.563	12	CALCOCO1	53708517	53727745	calcium binding and coiled-coil domain 1 [Source:HGNC Symbol;Acc:HGNC:29306]	no
ENSG00000012963	-0.329	0.003	0.008	14	UBR7	93207241	93229215	ubiquitin protein ligase E3 component n-recognin 7 [Source:HGNC Symbol;Acc:HGNC:20344]	no
ENSG00000012983	-0.257	0.022	0.045	14	MAP4K5	50418501	50561126	mitogen-activated protein kinase kinase kinase kinase 5 [Source:HGNC Symbol;Acc:HGNC:6867]	no
ENSG00000013016	0.348	0.002	0.005	2	EHD3	31234152	31269451	EH domain containing 3 [Source:HGNC Symbol;Acc:HGNC:3244]	no
ENSG00000013275	-0.192	0.09	0.147	19	PSMC4	39971165	39981764	proteasome 26S subunit, ATPase 4 [Source:HGNC Symbol;Acc:HGNC:9551]	no
ENSG00000013288	0.329	0.003	0.008	4	MAN2B2	6575189	6623362	mannosidase alpha class 2B member 2 [Source:HGNC Symbol;Acc:HGNC:29623]	no
ENSG00000013293	0.442	4.5e-05	0.00022	3	SLC7A14	170459548	170586075	solute carrier family 7 member 14 [Source:HGNC Symbol;Acc:HGNC:29326]	no
ENSG00000013297	0.096	0.402	0.502	3	CLDN11	170418868	170454733	claudin 11 [Source:HGNC Symbol;Acc:HGNC:8514]	no
ENSG00000013306	0.169	0.136	0.208	17	SLC25A39	44319625	44324870	solute carrier family 25 member 39 [Source:HGNC Symbol;Acc:HGNC:24279]	no
ENSG00000013364	0.023	0.843	0.882	16	MVP	29820394	29848039	major vault protein [Source:HGNC Symbol;Acc:HGNC:7531]	no
ENSG00000013374	-0.493	3.9e-06	2.7e-05	7	NUB1	151341772	151378449	negative regulator of ubiquitin like proteins 1 [Source:HGNC Symbol;Acc:HGNC:17623]	no
ENSG00000013375	-0.121	0.288	0.385	6	PGM3	83147324	83193936	phosphoglucomutase 3 [Source:HGNC Symbol;Acc:HGNC:8907]	no
ENSG00000013392	-0.244	0.03	0.059	6	RWDD2A	83193357	83198935	RWD domain containing 2A [Source:HGNC Symbol;Acc:HGNC:21385]	no
ENSG00000013441	-0.627	6.4e-10	1.5e-08	2	CLK1	200853009	200864691	CDC like kinase 1 [Source:HGNC Symbol;Acc:HGNC:2068]	no
ENSG00000013503	-0.5	2.7e-06	2e-05	12	POLR3B	106357748	106510198	RNA polymerase III subunit B [Source:HGNC Symbol;Acc:HGNC:30348]	no
ENSG00000013523	0.345	0.002	0.005	14	ANGEL1	76786009	76826246	angel homolog 1 [Source:HGNC Symbol;Acc:HGNC:19961]	no
ENSG00000013561	-0.293	0.009	0.021	5	RNF14	141958328	141990292	ring finger protein 14 [Source:HGNC Symbol;Acc:HGNC:10058]	no
ENSG00000013563	-0.202	0.074	0.126	X	DNASE1L1	154401236	154412112	deoxyribonuclease 1 like 1 [Source:HGNC Symbol;Acc:HGNC:2957]	no
ENSG00000013573	0.459	2.1e-05	0.00011	12	DDX11	31073860	31104799	DEAD/H-box helicase 11 [Source:HGNC Symbol;Acc:HGNC:2736]	no
ENSG00000013583	-0.352	0.001	0.004	12	HEBP1	12974870	13000265	heme binding protein 1 [Source:HGNC Symbol;Acc:HGNC:17176]	no
ENSG00000013810	0.127	0.266	0.361	4	TACC3	1712858	1745171	transforming acidic coiled-coil containing protein 3 [Source:HGNC Symbol;Acc:HGNC:11524]	no
ENSG00000014123	-0.141	0.217	0.306	6	UFL1	96521595	96555276	UFM1 specific ligase 1 [Source:HGNC Symbol;Acc:HGNC:23039]	no
ENSG00000014138	0.139	0.221	0.312	11	POLA2	65261913	65305959	DNA polymerase alpha 2, accessory subunit [Source:HGNC Symbol;Acc:HGNC:30073]	no
ENSG00000014164	0.035	0.756	0.816	8	ZC3H3	143437659	143541447	zinc finger CCCH-type containing 3 [Source:HGNC Symbol;Acc:HGNC:28972]	no
ENSG00000014216	0.26	0.02	0.042	11	CAPN1	65180566	65212006	calpain 1 [Source:HGNC Symbol;Acc:HGNC:1476]	no
ENSG00000014641	-0.029	0.8	0.85	2	MDH1	63588609	63607197	malate dehydrogenase 1 [Source:HGNC Symbol;Acc:HGNC:6970]	no
ENSG00000014824	-0.477	8.7e-06	5.4e-05	4	SLC30A9	41990502	42090461	solute carrier family 30 member 9 [Source:HGNC Symbol;Acc:HGNC:1329]	no
ENSG00000014914	-0.202	0.075	0.126	1	MTMR11	149928651	149936879	myotubularin related protein 11 [Source:HGNC Symbol;Acc:HGNC:24307]	no
ENSG00000014919	-0.199	0.079	0.132	10	COX15	99710868	99732127	cytochrome c oxidase assembly homolog COX15 [Source:HGNC Symbol;Acc:HGNC:2263]	no
ENSG00000137968	0.812	1e-19	3.3e-17	1	SLC44A5	75202129	75611114	solute carrier family 44 member 5 [Source:HGNC Symbol;Acc:HGNC:28524]	no
ENSG00000015171	-0.526	6.4e-07	5.6e-06	10	ZMYND11	130088	254637	zinc finger MYND-type containing 11 [Source:HGNC Symbol;Acc:HGNC:16966]	no
ENSG00000015413	0.135	0.237	0.329	16	DPEP1	89613308	89638456	dipeptidase 1 [Source:HGNC Symbol;Acc:HGNC:3002]	no
ENSG00000015475	-0.25	0.026	0.052	22	BID	17734138	17774770	BH3 interacting domain death agonist [Source:HGNC Symbol;Acc:HGNC:1050]	no
ENSG00000015479	-0.428	8.3e-05	0.00038	5	MATR3	139293674	139331677	matrin 3 [Source:HGNC Symbol;Acc:HGNC:6912]	no
ENSG00000086570	0.808	2.3e-19	7.1e-17	5	FAT2	151504092	151591331	FAT atypical cadherin 2 [Source:HGNC Symbol;Acc:HGNC:3596]	no
ENSG00000015676	-0.314	0.005	0.012	7	NUDCD3	44379119	44490658	NudC domain containing 3 [Source:HGNC Symbol;Acc:HGNC:22208]	no
ENSG00000016391	0.183	0.106	0.169	3	CHDH	53812335	53846419	choline dehydrogenase [Source:HGNC Symbol;Acc:HGNC:24288]	no
ENSG00000016864	-0.556	1e-07	1.2e-06	3	GLT8D1	52694486	52706032	glycosyltransferase 8 domain containing 1 [Source:HGNC Symbol;Acc:HGNC:24870]	no
ENSG00000017260	-0.493	4e-06	2.7e-05	3	ATP2C1	130850595	131016712	ATPase secretory pathway Ca2+ transporting 1 [Source:HGNC Symbol;Acc:HGNC:13211]	no
ENSG00000017483	0.306	0.006	0.015	X	SLC38A5	48458537	48470260	solute carrier family 38 member 5 [Source:HGNC Symbol;Acc:HGNC:18070]	no
ENSG00000017797	-0.046	0.69	0.76	18	RALBP1	9475009	9538114	ralA binding protein 1 [Source:HGNC Symbol;Acc:HGNC:9841]	no
ENSG00000018189	-0.527	6.2e-07	5.5e-06	4	RUFY3	70704204	70808619	RUN and FYVE domain containing 3 [Source:HGNC Symbol;Acc:HGNC:30285]	no
ENSG00000018236	-0.389	0.0004	0.001	12	CNTN1	40692439	41072415	contactin 1 [Source:HGNC Symbol;Acc:HGNC:2171]	no
ENSG00000018408	-0.303	0.007	0.016	3	WWTR1	149517235	149736714	WW domain containing transcription regulator 1 [Source:HGNC Symbol;Acc:HGNC:24042]	no
ENSG00000018510	-0.526	6.5e-07	5.7e-06	2	AGPS	177392746	177567024	alkylglycerone phosphate synthase [Source:HGNC Symbol;Acc:HGNC:327]	no
ENSG00000018610	-0.624	8.2e-10	1.8e-08	X	STEEP1	119538149	119565409	STING1 ER exit protein 1 [Source:HGNC Symbol;Acc:HGNC:26239]	no
ENSG00000018625	0.13	0.252	0.346	1	ATP1A2	160115759	160143591	ATPase Na+/K+ transporting subunit alpha 2 [Source:HGNC Symbol;Acc:HGNC:800]	no
ENSG00000018699	-0.39	0.00038	0.001	2	TTC27	32628032	32821051	tetratricopeptide repeat domain 27 [Source:HGNC Symbol;Acc:HGNC:25986]	no
ENSG00000018869	-0.445	4e-05	0.0002	19	ZNF582	56375846	56393538	zinc finger protein 582 [Source:HGNC Symbol;Acc:HGNC:26421]	no
ENSG00000019144	0.345	0.002	0.005	11	PHLDB1	118606440	118658031	pleckstrin homology like domain family B member 1 [Source:HGNC Symbol;Acc:HGNC:23697]	no
ENSG00000019485	-0.307	0.006	0.015	11	PRDM11	45095806	45235110	PR/SET domain 11 [Source:HGNC Symbol;Acc:HGNC:13996]	no
ENSG00000019505	-0.384	0.00048	0.002	11	SYT13	45240302	45286341	synaptotagmin 13 [Source:HGNC Symbol;Acc:HGNC:14962]	no
ENSG00000019582	-0.169	0.137	0.209	5	CD74	150401637	150412969	CD74 molecule [Source:HGNC Symbol;Acc:HGNC:1697]	no
ENSG00000019995	-0.579	2.3e-08	3.3e-07	10	ZRANB1	124942123	124988189	zinc finger RANBP2-type containing 1 [Source:HGNC Symbol;Acc:HGNC:18224]	no
ENSG00000020129	-0.192	0.089	0.146	1	NCDN	35557473	35567274	neurochondrin [Source:HGNC Symbol;Acc:HGNC:17597]	no
ENSG00000020181	0.093	0.417	0.516	8	ADGRA2	37784191	37844896	adhesion G protein-coupled receptor A2 [Source:HGNC Symbol;Acc:HGNC:17849]	no
ENSG00000020256	0.228	0.043	0.08	20	ZFP64	52051663	52204308	ZFP64 zinc finger protein [Source:HGNC Symbol;Acc:HGNC:15940]	no
ENSG00000020426	-0.515	1.2e-06	9.8e-06	14	MNAT1	60734742	60969965	MNAT1 component of CDK activating kinase [Source:HGNC Symbol;Acc:HGNC:7181]	no
ENSG00000020577	0.157	0.166	0.245	14	SAMD4A	54566117	54793315	sterile alpha motif domain containing 4A [Source:HGNC Symbol;Acc:HGNC:23023]	no
ENSG00000020922	0.216	0.056	0.099	11	MRE11	94415570	94493885	MRE11 homolog, double strand break repair nuclease [Source:HGNC Symbol;Acc:HGNC:7230]	no
ENSG00000021300	-0.018	0.875	0.907	11	PLEKHB1	73646178	73662819	pleckstrin homology domain containing B1 [Source:HGNC Symbol;Acc:HGNC:19079]	no
ENSG00000021355	-0.081	0.478	0.574	6	SERPINB1	2832332	2841959	serpin family B member 1 [Source:HGNC Symbol;Acc:HGNC:3311]	no
ENSG00000021574	-0.598	6e-09	1e-07	2	SPAST	32063556	32157637	spastin [Source:HGNC Symbol;Acc:HGNC:11233]	no
ENSG00000021645	-0.276	0.014	0.03	14	NRXN3	78170373	79868291	neurexin 3 [Source:HGNC Symbol;Acc:HGNC:8010]	no
ENSG00000227719	0.804	5e-19	1.4e-16	7	ENSG00000227719	8114025	8116561	novel transcript	no
ENSG00000021776	-0.637	2.7e-10	7e-09	15	AQR	34851782	34969742	aquarius intron-binding spliceosomal factor [Source:HGNC Symbol;Acc:HGNC:29513]	no
ENSG00000021826	-0.638	2.5e-10	6.6e-09	2	CPS1	210477682	210679107	carbamoyl-phosphate synthase 1 [Source:HGNC Symbol;Acc:HGNC:2323]	no
ENSG00000022267	-0.427	8.7e-05	0.00039	X	FHL1	136146702	136211359	four and a half LIM domains 1 [Source:HGNC Symbol;Acc:HGNC:3702]	no
ENSG00000022277	-0.577	2.7e-08	3.8e-07	20	RTF2	56468585	56519449	replication termination factor 2 [Source:HGNC Symbol;Acc:HGNC:15890]	no
ENSG00000022556	0.117	0.303	0.401	19	NLRP2	54953130	55001142	NLR family pyrin domain containing 2 [Source:HGNC Symbol;Acc:HGNC:22948]	no
ENSG00000022567	0.03	0.793	0.844	8	SLC45A4	141207166	141308305	solute carrier family 45 member 4 [Source:HGNC Symbol;Acc:HGNC:29196]	no
ENSG00000022840	-0.053	0.643	0.721	12	RNF10	120533480	120577588	ring finger protein 10 [Source:HGNC Symbol;Acc:HGNC:10055]	no
ENSG00000022976	0.069	0.546	0.638	14	ZNF839	102317377	102342702	zinc finger protein 839 [Source:HGNC Symbol;Acc:HGNC:20345]	no
ENSG00000023041	-0.644	1.5e-10	4.1e-09	10	ZDHHC6	112424428	112447572	zinc finger DHHC-type palmitoyltransferase 6 [Source:HGNC Symbol;Acc:HGNC:19160]	no
ENSG00000023171	0.29	0.01	0.022	11	GRAMD1B	123358428	123627774	GRAM domain containing 1B [Source:HGNC Symbol;Acc:HGNC:29214]	no
ENSG00000023191	0.138	0.227	0.318	11	RNH1	494512	507300	ribonuclease/angiogenin inhibitor 1 [Source:HGNC Symbol;Acc:HGNC:10074]	no
ENSG00000023228	-0.16	0.158	0.235	2	NDUFS1	206114817	206159509	NADH:ubiquinone oxidoreductase core subunit S1 [Source:HGNC Symbol;Acc:HGNC:7707]	no
ENSG00000023287	-0.163	0.151	0.226	8	RB1CC1	52622458	52745843	RB1 inducible coiled-coil 1 [Source:HGNC Symbol;Acc:HGNC:15574]	no
ENSG00000023318	-0.401	0.00025	0.00097	9	ERP44	99979185	100099052	endoplasmic reticulum protein 44 [Source:HGNC Symbol;Acc:HGNC:18311]	no
ENSG00000023330	-0.229	0.042	0.078	3	ALAS1	52198086	52214327	5'-aminolevulinate synthase 1 [Source:HGNC Symbol;Acc:HGNC:396]	no
ENSG00000023516	0.146	0.2	0.286	13	AKAP11	42272152	42323261	A-kinase anchoring protein 11 [Source:HGNC Symbol;Acc:HGNC:369]	no
ENSG00000023572	-0.058	0.611	0.694	1	GLRX2	193090866	193106114	glutaredoxin 2 [Source:HGNC Symbol;Acc:HGNC:16065]	no
ENSG00000023608	-0.199	0.078	0.131	14	SNAPC1	61762420	61796428	small nuclear RNA activating complex polypeptide 1 [Source:HGNC Symbol;Acc:HGNC:11134]	no
ENSG00000023697	-0.278	0.013	0.029	12	DERA	15911302	16037381	deoxyribose-phosphate aldolase [Source:HGNC Symbol;Acc:HGNC:24269]	no
ENSG00000023734	-0.371	0.00076	0.003	12	STRAP	15882387	15903478	serine/threonine kinase receptor associated protein [Source:HGNC Symbol;Acc:HGNC:30796]	no
ENSG00000023892	0.408	0.00019	0.00077	6	DEF6	35297818	35321771	DEF6 guanine nucleotide exchange factor [Source:HGNC Symbol;Acc:HGNC:2760]	no
ENSG00000023902	-0.155	0.173	0.253	1	PLEKHO1	150149183	150164720	pleckstrin homology domain containing O1 [Source:HGNC Symbol;Acc:HGNC:24310]	no
ENSG00000023909	-0.233	0.039	0.073	1	GCLM	93885199	93909456	glutamate-cysteine ligase modifier subunit [Source:HGNC Symbol;Acc:HGNC:4312]	no
ENSG00000024048	0.081	0.48	0.575	6	UBR2	42564029	42693505	ubiquitin protein ligase E3 component n-recognin 2 [Source:HGNC Symbol;Acc:HGNC:21289]	no
ENSG00000024422	-0.3	0.007	0.017	19	EHD2	47713422	47743134	EH domain containing 2 [Source:HGNC Symbol;Acc:HGNC:3243]	no
ENSG00000024526	-0.261	0.02	0.041	1	DEPDC1	68474152	68497221	DEP domain containing 1 [Source:HGNC Symbol;Acc:HGNC:22949]	no
ENSG00000024862	-0.266	0.018	0.038	6	CCDC28A	138773769	138793319	coiled-coil domain containing 28A [Source:HGNC Symbol;Acc:HGNC:21098]	no
ENSG00000025039	-0.129	0.256	0.351	6	RRAGD	89364616	89412273	Ras related GTP binding D [Source:HGNC Symbol;Acc:HGNC:19903]	no
ENSG00000025156	-0.061	0.594	0.68	6	HSF2	122399551	122433119	heat shock transcription factor 2 [Source:HGNC Symbol;Acc:HGNC:5225]	no
ENSG00000025293	-0.386	0.00044	0.002	20	PHF20	35771974	35950370	PHD finger protein 20 [Source:HGNC Symbol;Acc:HGNC:16098]	no
ENSG00000148773	0.802	6.4e-19	1.7e-16	10	MKI67	128096659	128126423	marker of proliferation Ki-67 [Source:HGNC Symbol;Acc:HGNC:7107]	no
ENSG00000025770	0.211	0.062	0.108	22	NCAPH2	50508224	50524780	non-SMC condensin II complex subunit H2 [Source:HGNC Symbol;Acc:HGNC:25071]	no
ENSG00000025772	-0.123	0.28	0.376	20	TOMM34	44942130	44960397	translocase of outer mitochondrial membrane 34 [Source:HGNC Symbol;Acc:HGNC:15746]	no
ENSG00000025796	-0.088	0.441	0.538	6	SEC63	107867756	107958208	SEC63 homolog, protein translocation regulator [Source:HGNC Symbol;Acc:HGNC:21082]	no
ENSG00000025800	0.075	0.511	0.605	1	KPNA6	32108056	32176563	karyopherin subunit alpha 6 [Source:HGNC Symbol;Acc:HGNC:6399]	no
ENSG00000026025	0.119	0.297	0.395	10	VIM	17228241	17237593	vimentin [Source:HGNC Symbol;Acc:HGNC:12692]	no
ENSG00000198198	0.802	6e-19	1.7e-16	1	SZT2	43389882	43454247	SZT2 subunit of KICSTOR complex [Source:HGNC Symbol;Acc:HGNC:29040]	no
ENSG00000026103	-0.309	0.006	0.014	10	FAS	88953813	89029605	Fas cell surface death receptor [Source:HGNC Symbol;Acc:HGNC:11920]	no
ENSG00000026297	0.377	0.00062	0.002	6	RNASET2	166922113	166957191	ribonuclease T2 [Source:HGNC Symbol;Acc:HGNC:21686]	no
ENSG00000026508	-0.322	0.004	0.01	11	CD44	35138882	35232402	CD44 molecule (Indian blood group) [Source:HGNC Symbol;Acc:HGNC:1681]	no
ENSG00000278635	0.798	1.4e-18	3.6e-16	12	ENSG00000278635	9415641	9416718	WAS protein family homolog 1 (WASH1) pseudogene	no
ENSG00000026652	0.35	0.002	0.005	6	AGPAT4	161129967	161274061	1-acylglycerol-3-phosphate O-acyltransferase 4 [Source:HGNC Symbol;Acc:HGNC:20885]	no
ENSG00000026950	0.262	0.02	0.041	6	BTN3A1	26402237	26415208	butyrophilin subfamily 3 member A1 [Source:HGNC Symbol;Acc:HGNC:1138]	no
ENSG00000027001	-0.086	0.452	0.549	13	MIPEP	23730189	23889400	mitochondrial intermediate peptidase [Source:HGNC Symbol;Acc:HGNC:7104]	no
ENSG00000027075	0.364	0.00097	0.003	14	PRKCH	61187559	61550976	protein kinase C eta [Source:HGNC Symbol;Acc:HGNC:9403]	no
ENSG00000027697	-0.406	0.00021	0.00083	6	IFNGR1	137197483	137219449	interferon gamma receptor 1 [Source:HGNC Symbol;Acc:HGNC:5439]	no
ENSG00000027847	-0.001	0.99	0.992	5	B4GALT7	177600132	177610330	beta-1,4-galactosyltransferase 7 [Source:HGNC Symbol;Acc:HGNC:930]	no
ENSG00000188002	0.797	1.5e-18	3.8e-16	5	PDCD6P1	1598920	1633984	PDCD6 pseudogene 1 [Source:HGNC Symbol;Acc:HGNC:55763]	no
ENSG00000028116	-0.59	1.1e-08	1.7e-07	2	VRK2	57907629	58159920	VRK serine/threonine kinase 2 [Source:HGNC Symbol;Acc:HGNC:12719]	no
ENSG00000263847	0.797	1.6e-18	3.9e-16	18	ENSG00000263847	9112404	9115877	novel transcript, antisense to NDUFV2	no
ENSG00000028203	-0.396	0.0003	0.001	12	VEZT	95217746	95302799	vezatin, adherens junctions transmembrane protein [Source:HGNC Symbol;Acc:HGNC:18258]	no
ENSG00000028277	0.429	8e-05	0.00036	19	POU2F2	42086110	42196585	POU class 2 homeobox 2 [Source:HGNC Symbol;Acc:HGNC:9213]	no
ENSG00000028310	0.464	1.7e-05	9.3e-05	5	BRD9	850291	892801	bromodomain containing 9 [Source:HGNC Symbol;Acc:HGNC:25818]	no
ENSG00000028528	0.144	0.205	0.293	15	SNX1	64094123	64146090	sorting nexin 1 [Source:HGNC Symbol;Acc:HGNC:11172]	no
ENSG00000028839	-0.603	4.1e-09	7.3e-08	6	TBPL1	133952170	133990432	TATA-box binding protein like 1 [Source:HGNC Symbol;Acc:HGNC:11589]	no
ENSG00000029153	0.013	0.913	0.934	12	BMAL2	27332836	27425289	basic helix-loop-helix ARNT like 2 [Source:HGNC Symbol;Acc:HGNC:18984]	no
ENSG00000029363	-0.264	0.019	0.039	6	BCLAF1	136256627	136289851	BCL2 associated transcription factor 1 [Source:HGNC Symbol;Acc:HGNC:16863]	no
ENSG00000029364	-0.085	0.456	0.552	14	SLC39A9	69398015	69462390	solute carrier family 39 member 9 [Source:HGNC Symbol;Acc:HGNC:20182]	no
ENSG00000029534	0.26	0.021	0.042	8	ANK1	41653220	41896741	ankyrin 1 [Source:HGNC Symbol;Acc:HGNC:492]	no
ENSG00000029639	0.019	0.867	0.901	6	TFB1M	155256134	155314493	transcription factor B1, mitochondrial [Source:HGNC Symbol;Acc:HGNC:17037]	no
ENSG00000029725	-0.493	3.8e-06	2.6e-05	17	RABEP1	5282265	5386340	rabaptin, RAB GTPase binding effector protein 1 [Source:HGNC Symbol;Acc:HGNC:17677]	no
ENSG00000029993	-0.407	0.0002	0.00079	X	HMGB3	150980509	150990771	high mobility group box 3 [Source:HGNC Symbol;Acc:HGNC:5004]	no
ENSG00000030066	-0.088	0.442	0.54	11	NUP160	47778087	47848555	nucleoporin 160 [Source:HGNC Symbol;Acc:HGNC:18017]	no
ENSG00000030110	-0.215	0.057	0.101	6	BAK1	33572547	33580293	BCL2 antagonist/killer 1 [Source:HGNC Symbol;Acc:HGNC:949]	no
ENSG00000030419	-0.058	0.614	0.696	2	IKZF2	212999691	213152427	IKAROS family zinc finger 2 [Source:HGNC Symbol;Acc:HGNC:13177]	no
ENSG00000030582	0.157	0.167	0.246	17	GRN	44345246	44353106	granulin precursor [Source:HGNC Symbol;Acc:HGNC:4601]	no
ENSG00000031003	0.009	0.94	0.956	5	FAM13B	137937960	138051961	family with sequence similarity 13 member B [Source:HGNC Symbol;Acc:HGNC:1335]	no
ENSG00000031081	0.457	2.3e-05	0.00012	3	ARHGAP31	119294383	119420714	Rho GTPase activating protein 31 [Source:HGNC Symbol;Acc:HGNC:29216]	no
ENSG00000031691	-0.66	3.8e-11	1.3e-09	6	CENPQ	49463370	49493107	centromere protein Q [Source:HGNC Symbol;Acc:HGNC:21347]	no
ENSG00000031698	-0.151	0.185	0.268	1	SARS1	109213918	109238182	seryl-tRNA synthetase 1 [Source:HGNC Symbol;Acc:HGNC:10537]	no
ENSG00000031823	-0.015	0.896	0.922	19	RANBP3	5916139	5978142	RAN binding protein 3 [Source:HGNC Symbol;Acc:HGNC:9850]	no
ENSG00000032219	-0.33	0.003	0.008	14	ARID4A	58298504	58373887	AT-rich interaction domain 4A [Source:HGNC Symbol;Acc:HGNC:9885]	no
ENSG00000032389	-0.028	0.807	0.854	2	EIPR1	3188925	3377830	EARP complex and GARP complex interacting protein 1 [Source:HGNC Symbol;Acc:HGNC:12383]	no
ENSG00000032444	0.278	0.013	0.029	19	PNPLA6	7534004	7561764	patatin like phospholipase domain containing 6 [Source:HGNC Symbol;Acc:HGNC:16268]	no
ENSG00000032742	-0.054	0.634	0.713	13	IFT88	20567138	20691444	intraflagellar transport 88 [Source:HGNC Symbol;Acc:HGNC:20606]	no
ENSG00000033011	-0.104	0.362	0.462	16	ALG1	5033702	5087379	ALG1 chitobiosyldiphosphodolichol beta-mannosyltransferase [Source:HGNC Symbol;Acc:HGNC:18294]	no
ENSG00000033030	-0.291	0.009	0.021	12	ZCCHC8	122471599	122501073	zinc finger CCHC-type containing 8 [Source:HGNC Symbol;Acc:HGNC:25265]	no
ENSG00000033050	-0.157	0.168	0.248	7	ABCF2	151211484	151227205	ATP binding cassette subfamily F member 2 [Source:HGNC Symbol;Acc:HGNC:71]	no
ENSG00000033100	-0.117	0.304	0.402	7	CHPF2	151232483	151240979	chondroitin polymerizing factor 2 [Source:HGNC Symbol;Acc:HGNC:29270]	no
ENSG00000033170	-0.559	8.4e-08	1e-06	14	FUT8	65410592	65744121	fucosyltransferase 8 [Source:HGNC Symbol;Acc:HGNC:4019]	no
ENSG00000033178	-0.088	0.439	0.537	4	UBA6	67612652	67701155	ubiquitin like modifier activating enzyme 6 [Source:HGNC Symbol;Acc:HGNC:25581]	no
ENSG00000033327	0.028	0.808	0.855	11	GAB2	78215293	78418348	GRB2 associated binding protein 2 [Source:HGNC Symbol;Acc:HGNC:14458]	no
ENSG00000033627	-0.029	0.8	0.85	17	ATP6V0A1	42458844	42522582	ATPase H+ transporting V0 subunit a1 [Source:HGNC Symbol;Acc:HGNC:865]	no
ENSG00000033800	-0.201	0.076	0.127	15	PIAS1	68054309	68198603	protein inhibitor of activated STAT 1 [Source:HGNC Symbol;Acc:HGNC:2752]	no
ENSG00000033867	-0.27	0.016	0.034	3	SLC4A7	27372721	27484420	solute carrier family 4 member 7 [Source:HGNC Symbol;Acc:HGNC:11033]	no
ENSG00000034053	0.077	0.499	0.593	15	APBA2	28884483	29118315	amyloid beta precursor protein binding family A member 2 [Source:HGNC Symbol;Acc:HGNC:579]	no
ENSG00000034152	0.196	0.083	0.138	17	MAP2K3	21284672	21315232	mitogen-activated protein kinase kinase 3 [Source:HGNC Symbol;Acc:HGNC:6843]	no
ENSG00000034510	-0.034	0.765	0.822	2	TMSB10	84905656	84906671	thymosin beta 10 [Source:HGNC Symbol;Acc:HGNC:11879]	no
ENSG00000034533	0.101	0.376	0.476	3	ASTE1	131013875	131027649	asteroid homolog 1 [Source:HGNC Symbol;Acc:HGNC:25021]	no
ENSG00000034677	0.055	0.629	0.709	8	RNF19A	100257060	100336218	ring finger protein 19A, RBR E3 ubiquitin protein ligase [Source:HGNC Symbol;Acc:HGNC:13432]	no
ENSG00000034693	0.007	0.95	0.963	6	PEX3	143450805	143490616	peroxisomal biogenesis factor 3 [Source:HGNC Symbol;Acc:HGNC:8858]	no
ENSG00000034713	-0.419	0.00012	0.00052	16	GABARAPL2	75566375	75577881	GABA type A receptor associated protein like 2 [Source:HGNC Symbol;Acc:HGNC:13291]	no
ENSG00000035115	-0.578	2.4e-08	3.5e-07	2	SH3YL1	217730	266398	SH3 and SYLF domain containing 1 [Source:HGNC Symbol;Acc:HGNC:29546]	no
ENSG00000035141	-0.52	8.9e-07	7.5e-06	2	FAM136A	70295976	70302067	family with sequence similarity 136 member A [Source:HGNC Symbol;Acc:HGNC:25911]	no
ENSG00000035403	-0.08	0.483	0.578	10	VCL	73995193	74121363	vinculin [Source:HGNC Symbol;Acc:HGNC:12665]	no
ENSG00000035499	-0.48	7.7e-06	4.9e-05	5	DEPDC1B	60596912	60700190	DEP domain containing 1B [Source:HGNC Symbol;Acc:HGNC:24902]	no
ENSG00000035664	0.466	1.5e-05	8.6e-05	15	DAPK2	63907036	64072033	death associated protein kinase 2 [Source:HGNC Symbol;Acc:HGNC:2675]	no
ENSG00000035681	-0.492	4e-06	2.7e-05	8	NSMAF	58583508	58659853	neutral sphingomyelinase activation associated factor [Source:HGNC Symbol;Acc:HGNC:8017]	no
ENSG00000035687	0.003	0.979	0.983	1	ADSS2	244408494	244451909	adenylosuccinate synthase 2 [Source:HGNC Symbol;Acc:HGNC:292]	no
ENSG00000035862	0.19	0.094	0.153	17	TIMP2	78852977	78925387	TIMP metallopeptidase inhibitor 2 [Source:HGNC Symbol;Acc:HGNC:11821]	no
ENSG00000035928	-0.282	0.012	0.026	4	RFC1	39287456	39366375	replication factor C subunit 1 [Source:HGNC Symbol;Acc:HGNC:9969]	no
ENSG00000036054	-0.239	0.034	0.064	3	TBC1D23	100260992	100325251	TBC1 domain family member 23 [Source:HGNC Symbol;Acc:HGNC:25622]	no
ENSG00000036257	-0.478	8.5e-06	5.3e-05	2	CUL3	224470150	224585397	cullin 3 [Source:HGNC Symbol;Acc:HGNC:2553]	no
ENSG00000036549	-0.463	1.7e-05	9.5e-05	1	ZZZ3	77562416	77683419	zinc finger ZZ-type containing 3 [Source:HGNC Symbol;Acc:HGNC:24523]	no
ENSG00000270871	0.796	1.9e-18	4.6e-16	17	ENSG00000270871	35816717	35830293	novel transcript, antisense TAF15	no
ENSG00000135917	0.795	2.2e-18	5.2e-16	2	SLC19A3	227683763	227718028	solute carrier family 19 member 3 [Source:HGNC Symbol;Acc:HGNC:16266]	no
ENSG00000037241	0.129	0.257	0.352	5	RPL26L1	172958729	172969771	ribosomal protein L26 like 1 [Source:HGNC Symbol;Acc:HGNC:17050]	no
ENSG00000100346	0.794	2.5e-18	5.9e-16	22	CACNA1I	39570753	39689735	calcium voltage-gated channel subunit alpha1 I [Source:HGNC Symbol;Acc:HGNC:1396]	no
ENSG00000037474	0.288	0.01	0.023	5	NSUN2	6599239	6633291	NOP2/Sun RNA methyltransferase 2 [Source:HGNC Symbol;Acc:HGNC:25994]	no
ENSG00000037637	-0.336	0.002	0.007	1	FBXO42	16246840	16352480	F-box protein 42 [Source:HGNC Symbol;Acc:HGNC:29249]	no
ENSG00000037749	-0.021	0.854	0.891	5	MFAP3	154038959	154220478	microfibril associated protein 3 [Source:HGNC Symbol;Acc:HGNC:7034]	no
ENSG00000134285	0.794	2.8e-18	6.3e-16	12	FKBP11	48921518	48926474	FKBP prolyl isomerase 11 [Source:HGNC Symbol;Acc:HGNC:18624]	no
ENSG00000037897	-0.303	0.007	0.016	12	METTL1	57768471	57772119	methyltransferase 1, tRNA methylguanosine [Source:HGNC Symbol;Acc:HGNC:7030]	no
ENSG00000286595	0.794	2.6e-18	5.9e-16	14	ENSG00000286595	48194174	48228216	novel transcript	no
ENSG00000038210	-0.322	0.004	0.01	4	PI4K2B	25160663	25279204	phosphatidylinositol 4-kinase type 2 beta [Source:HGNC Symbol;Acc:HGNC:18215]	no
ENSG00000038219	0.382	0.00051	0.002	4	BOD1L1	13568738	13627725	biorientation of chromosomes in cell division 1 like 1 [Source:HGNC Symbol;Acc:HGNC:31792]	no
ENSG00000038274	-0.2	0.076	0.129	5	MAT2B	163503114	163519558	methionine adenosyltransferase 2B [Source:HGNC Symbol;Acc:HGNC:6905]	no
ENSG00000038358	-0.024	0.83	0.873	16	EDC4	67873052	67884499	enhancer of mRNA decapping 4 [Source:HGNC Symbol;Acc:HGNC:17157]	no
ENSG00000038382	0.445	3.9e-05	0.00019	5	TRIO	14143342	14532128	trio Rho guanine nucleotide exchange factor [Source:HGNC Symbol;Acc:HGNC:12303]	no
ENSG00000038427	-0.076	0.505	0.599	5	VCAN	83471618	83582303	versican [Source:HGNC Symbol;Acc:HGNC:2464]	no
ENSG00000038532	0.293	0.009	0.021	16	CLEC16A	10944539	11182186	C-type lectin domain containing 16A [Source:HGNC Symbol;Acc:HGNC:29013]	no
ENSG00000039068	-0.673	1.1e-11	4.5e-10	16	CDH1	68737292	68835537	cadherin 1 [Source:HGNC Symbol;Acc:HGNC:1748]	no
ENSG00000039123	-0.535	3.8e-07	3.6e-06	5	MTREX	55307989	55425579	Mtr4 exosome RNA helicase [Source:HGNC Symbol;Acc:HGNC:18734]	no
ENSG00000039139	-0.428	8.2e-05	0.00037	5	DNAH5	13690328	14011818	dynein axonemal heavy chain 5 [Source:HGNC Symbol;Acc:HGNC:2950]	no
ENSG00000039319	-0.036	0.754	0.814	5	ZFYVE16	80408013	80483379	zinc finger FYVE-type containing 16 [Source:HGNC Symbol;Acc:HGNC:20756]	no
ENSG00000039523	0.202	0.075	0.126	16	RIPOR1	67518418	67546788	RHO family interacting cell polarization regulator 1 [Source:HGNC Symbol;Acc:HGNC:25836]	no
ENSG00000039560	0.029	0.798	0.848	5	RAI14	34656328	34832612	retinoic acid induced 14 [Source:HGNC Symbol;Acc:HGNC:14873]	no
ENSG00000039650	0.223	0.048	0.086	19	PNKP	49859882	49878351	polynucleotide kinase 3'-phosphatase [Source:HGNC Symbol;Acc:HGNC:9154]	no
ENSG00000039987	-0.328	0.003	0.009	19	BEST2	12751702	12758458	bestrophin 2 [Source:HGNC Symbol;Acc:HGNC:17107]	no
ENSG00000040199	0.127	0.265	0.361	16	PHLPP2	71637835	71724701	PH domain and leucine rich repeat protein phosphatase 2 [Source:HGNC Symbol;Acc:HGNC:29149]	no
ENSG00000040275	-0.133	0.244	0.337	5	SPDL1	169583636	169604778	spindle apparatus coiled-coil protein 1 [Source:HGNC Symbol;Acc:HGNC:26010]	no
ENSG00000040341	-0.448	3.5e-05	0.00018	8	STAU2	73420369	73747708	staufen double-stranded RNA binding protein 2 [Source:HGNC Symbol;Acc:HGNC:11371]	no
ENSG00000040487	-0.046	0.685	0.756	1	SLC66A1	19312326	19329300	solute carrier family 66 member 1 [Source:HGNC Symbol;Acc:HGNC:26001]	no
ENSG00000040531	0.074	0.516	0.609	17	CTNS	3636459	3663103	cystinosin, lysosomal cystine transporter [Source:HGNC Symbol;Acc:HGNC:2518]	no
ENSG00000040608	0.352	0.001	0.004	22	RTN4R	20241415	20283246	reticulon 4 receptor [Source:HGNC Symbol;Acc:HGNC:18601]	no
ENSG00000040633	-0.225	0.046	0.084	17	PHF23	7235029	7239722	PHD finger protein 23 [Source:HGNC Symbol;Acc:HGNC:28428]	no
ENSG00000040933	0.35	0.002	0.005	2	INPP4A	98444854	98594392	inositol polyphosphate-4-phosphatase type I A [Source:HGNC Symbol;Acc:HGNC:6074]	no
ENSG00000041357	0.017	0.885	0.914	15	PSMA4	78540405	78552417	proteasome 20S subunit alpha 4 [Source:HGNC Symbol;Acc:HGNC:9533]	no
ENSG00000041802	-0.18	0.113	0.178	3	LSG1	194640791	194672463	large 60S subunit nuclear export GTPase 1 [Source:HGNC Symbol;Acc:HGNC:25652]	no
ENSG00000041982	0.028	0.809	0.856	9	TNC	115019575	115118207	tenascin C [Source:HGNC Symbol;Acc:HGNC:5318]	no
ENSG00000041988	0.354	0.001	0.004	1	THAP3	6624868	6635586	THAP domain containing 3 [Source:HGNC Symbol;Acc:HGNC:20855]	no
ENSG00000144026	0.793	3e-18	6.7e-16	2	ZNF514	95122087	95165668	zinc finger protein 514 [Source:HGNC Symbol;Acc:HGNC:25894]	no
ENSG00000042088	0.242	0.031	0.061	14	TDP1	89954939	90044764	tyrosyl-DNA phosphodiesterase 1 [Source:HGNC Symbol;Acc:HGNC:18884]	no
ENSG00000042286	-0.266	0.018	0.038	10	AIFM2	70098223	70132934	apoptosis inducing factor mitochondria associated 2 [Source:HGNC Symbol;Acc:HGNC:21411]	no
ENSG00000042317	-0.242	0.032	0.062	14	SPATA7	88384924	88470350	spermatogenesis associated 7 [Source:HGNC Symbol;Acc:HGNC:20423]	no
ENSG00000042429	0.201	0.075	0.127	11	MED17	93784227	93814963	mediator complex subunit 17 [Source:HGNC Symbol;Acc:HGNC:2375]	no
ENSG00000042445	0.453	2.7e-05	0.00014	2	RETSAT	85341955	85354531	retinol saturase [Source:HGNC Symbol;Acc:HGNC:25991]	no
ENSG00000042493	-0.046	0.689	0.76	2	CAPG	85394753	85418432	capping actin protein, gelsolin like [Source:HGNC Symbol;Acc:HGNC:1474]	no
ENSG00000042753	0.038	0.74	0.801	19	AP2S1	46838136	46850846	adaptor related protein complex 2 subunit sigma 1 [Source:HGNC Symbol;Acc:HGNC:565]	no
ENSG00000043093	-0.375	0.00067	0.002	3	DCUN1D1	182938074	182985953	defective in cullin neddylation 1 domain containing 1 [Source:HGNC Symbol;Acc:HGNC:18184]	no
ENSG00000043143	-0.309	0.006	0.014	5	JADE2	134524312	134583230	jade family PHD finger 2 [Source:HGNC Symbol;Acc:HGNC:22984]	no
ENSG00000043355	-0.664	2.5e-11	9e-10	13	ZIC2	99981784	99986765	Zic family member 2 [Source:HGNC Symbol;Acc:HGNC:12873]	no
ENSG00000251364	0.793	3.2e-18	6.8e-16	11	SYT9-AS1	7418826	7513665	SYT9 antisense RNA 1 [Source:HGNC Symbol;Acc:HGNC:56173]	no
ENSG00000044090	-0.041	0.72	0.786	6	CUL7	43037617	43053943	cullin 7 [Source:HGNC Symbol;Acc:HGNC:21024]	no
ENSG00000044115	-0.833	1.7e-21	8.6e-19	5	CTNNA1	138610967	138935034	catenin alpha 1 [Source:HGNC Symbol;Acc:HGNC:2509]	no
ENSG00000044446	0.079	0.49	0.586	X	PHKA2	18892298	18984114	phosphorylase kinase regulatory subunit alpha 2 [Source:HGNC Symbol;Acc:HGNC:8926]	no
ENSG00000044459	-0.475	9.9e-06	6e-05	9	CNTLN	17134982	17503923	centlein [Source:HGNC Symbol;Acc:HGNC:23432]	no
ENSG00000044524	0.03	0.796	0.846	3	EPHA3	89107621	89482134	EPH receptor A3 [Source:HGNC Symbol;Acc:HGNC:3387]	no
ENSG00000044574	0.239	0.034	0.065	9	HSPA5	125234853	125241382	heat shock protein family A (Hsp70) member 5 [Source:HGNC Symbol;Acc:HGNC:5238]	no
ENSG00000046604	-0.343	0.002	0.006	18	DSG2	31498177	31549008	desmoglein 2 [Source:HGNC Symbol;Acc:HGNC:3049]	no
ENSG00000046647	0.276	0.014	0.03	X	GEMIN8	14006726	14029893	gem nuclear organelle associated protein 8 [Source:HGNC Symbol;Acc:HGNC:26044]	no
ENSG00000046651	-0.24	0.033	0.063	X	OFD1	13734743	13777955	OFD1 centriole and centriolar satellite protein [Source:HGNC Symbol;Acc:HGNC:2567]	no
ENSG00000046653	-0.477	9e-06	5.5e-05	X	GPM6B	13770939	13938638	glycoprotein M6B [Source:HGNC Symbol;Acc:HGNC:4461]	no
ENSG00000046889	-0.512	1.4e-06	1.1e-05	8	PREX2	67952046	68237032	phosphatidylinositol-3,4,5-trisphosphate dependent Rac exchange factor 2 [Source:HGNC Symbol;Acc:HGNC:22950]	no
ENSG00000047056	-0.124	0.278	0.375	10	WDR37	1049538	1160991	WD repeat domain 37 [Source:HGNC Symbol;Acc:HGNC:31406]	no
ENSG00000047188	0.353	0.001	0.004	5	YTHDC2	113513694	113595285	YTH domain containing 2 [Source:HGNC Symbol;Acc:HGNC:24721]	no
ENSG00000047230	-0.689	2.3e-12	1.1e-10	X	CTPS2	16587999	16712936	CTP synthase 2 [Source:HGNC Symbol;Acc:HGNC:2520]	no
ENSG00000047249	-0.418	0.00013	0.00055	8	ATP6V1H	53715543	53843558	ATPase H+ transporting V1 subunit H [Source:HGNC Symbol;Acc:HGNC:18303]	no
ENSG00000047315	-0.348	0.002	0.005	4	POLR2B	56977722	57031158	RNA polymerase II subunit B [Source:HGNC Symbol;Acc:HGNC:9188]	no
ENSG00000047346	0.073	0.522	0.615	15	ATOSA	52581317	52709817	atos homolog A [Source:HGNC Symbol;Acc:HGNC:25609]	no
ENSG00000047365	-0.038	0.743	0.804	4	ARAP2	35948221	36244514	ArfGAP with RhoGAP domain, ankyrin repeat and PH domain 2 [Source:HGNC Symbol;Acc:HGNC:16924]	no
ENSG00000047410	0.173	0.127	0.196	1	TPR	186311652	186375693	translocated promoter region, nuclear basket protein [Source:HGNC Symbol;Acc:HGNC:12017]	no
ENSG00000047578	-0.2	0.077	0.129	16	KATNIP	27550133	27780344	katanin interacting protein [Source:HGNC Symbol;Acc:HGNC:29068]	no
ENSG00000047579	0.238	0.035	0.066	6	DTNBP1	15522807	15663058	dystrobrevin binding protein 1 [Source:HGNC Symbol;Acc:HGNC:17328]	no
ENSG00000047597	-0.525	6.9e-07	6e-06	X	XK	37685791	37732130	X-linked Kx blood group antigen, Kell and VPS13A binding protein [Source:HGNC Symbol;Acc:HGNC:12811]	no
ENSG00000047617	-0.204	0.071	0.121	12	ANO2	5531869	5946232	anoctamin 2 [Source:HGNC Symbol;Acc:HGNC:1183]	no
ENSG00000047621	0.147	0.195	0.281	12	C12orf4	4487735	4538508	chromosome 12 open reading frame 4 [Source:HGNC Symbol;Acc:HGNC:1184]	no
ENSG00000047634	0.516	1.1e-06	9.1e-06	X	SCML1	17737449	17754988	Scm polycomb group protein like 1 [Source:HGNC Symbol;Acc:HGNC:10580]	no
ENSG00000047644	0.112	0.325	0.424	X	WWC3	10015254	10144474	WWC family member 3 [Source:HGNC Symbol;Acc:HGNC:29237]	no
ENSG00000047849	-0.014	0.904	0.928	3	MAP4	47850690	48089272	microtubule associated protein 4 [Source:HGNC Symbol;Acc:HGNC:6862]	no
ENSG00000047932	-0.217	0.054	0.096	6	GOPC	117560269	117602542	golgi associated PDZ and coiled-coil motif containing [Source:HGNC Symbol;Acc:HGNC:17643]	no
ENSG00000048028	-0.171	0.132	0.203	11	USP28	113797874	113875572	ubiquitin specific peptidase 28 [Source:HGNC Symbol;Acc:HGNC:12625]	no
ENSG00000048052	-0.279	0.013	0.028	7	HDAC9	18086949	19002416	histone deacetylase 9 [Source:HGNC Symbol;Acc:HGNC:14065]	no
ENSG00000048140	0.081	0.477	0.572	5	TSPAN17	176647387	176659054	tetraspanin 17 [Source:HGNC Symbol;Acc:HGNC:13594]	no
ENSG00000048162	0.274	0.015	0.032	5	NOP16	176383946	176388927	NOP16 nucleolar protein [Source:HGNC Symbol;Acc:HGNC:26934]	no
ENSG00000048342	-0.542	2.5e-07	2.6e-06	4	CC2D2A	15469865	15601552	coiled-coil and C2 domain containing 2A [Source:HGNC Symbol;Acc:HGNC:29253]	no
ENSG00000048392	-0.265	0.018	0.038	8	RRM2B	102204502	102238961	ribonucleotide reductase regulatory TP53 inducible subunit M2B [Source:HGNC Symbol;Acc:HGNC:17296]	no
ENSG00000048405	-0.051	0.657	0.733	7	ZNF800	127346790	127431924	zinc finger protein 800 [Source:HGNC Symbol;Acc:HGNC:27267]	no
ENSG00000048471	-0.35	0.002	0.005	16	SNX29	11976734	12574287	sorting nexin 29 [Source:HGNC Symbol;Acc:HGNC:30542]	no
ENSG00000048540	-0.293	0.009	0.021	12	LMO3	16548372	16610594	LIM domain only 3 [Source:HGNC Symbol;Acc:HGNC:6643]	no
ENSG00000048544	-0.647	1.2e-10	3.5e-09	6	MRPS10	42206807	42217861	mitochondrial ribosomal protein S10 [Source:HGNC Symbol;Acc:HGNC:14502]	no
ENSG00000048649	-0.587	1.3e-08	2e-07	11	RSF1	77660009	77820869	remodeling and spacing factor 1 [Source:HGNC Symbol;Acc:HGNC:18118]	no
ENSG00000272849	0.793	3.2e-18	6.9e-16	12	ENSG00000272849	121797511	121801972	novel transcript	no
ENSG00000048740	-0.231	0.04	0.075	10	CELF2	10798397	11336675	CUGBP Elav-like family member 2 [Source:HGNC Symbol;Acc:HGNC:2550]	no
ENSG00000048828	0.073	0.521	0.614	9	FAM120A	93451685	93566112	family with sequence similarity 120A [Source:HGNC Symbol;Acc:HGNC:13247]	no
ENSG00000048991	-0.116	0.31	0.408	2	R3HDM1	135531455	135725270	R3H domain containing 1 [Source:HGNC Symbol;Acc:HGNC:9757]	no
ENSG00000049089	0.161	0.157	0.234	1	COL9A2	40300489	40317813	collagen type IX alpha 2 chain [Source:HGNC Symbol;Acc:HGNC:2218]	no
ENSG00000049130	-0.182	0.108	0.172	12	KITLG	88492793	88580851	KIT ligand [Source:HGNC Symbol;Acc:HGNC:6343]	no
ENSG00000049167	-0.16	0.158	0.235	5	ERCC8	60866454	60945073	ERCC excision repair 8, CSA ubiquitin ligase complex subunit [Source:HGNC Symbol;Acc:HGNC:3439]	no
ENSG00000049192	-0.093	0.416	0.516	5	ADAMTS6	65148738	65481920	ADAM metallopeptidase with thrombospondin type 1 motif 6 [Source:HGNC Symbol;Acc:HGNC:222]	no
ENSG00000184787	0.792	3.4e-18	7e-16	21	UBE2G2	44768580	44801826	ubiquitin conjugating enzyme E2 G2 [Source:HGNC Symbol;Acc:HGNC:12483]	no
ENSG00000049245	-0.658	4.6e-11	1.5e-09	1	VAMP3	7771296	7781432	vesicle associated membrane protein 3 [Source:HGNC Symbol;Acc:HGNC:12644]	no
ENSG00000049246	-0.191	0.092	0.15	1	PER3	7784291	7845177	period circadian regulator 3 [Source:HGNC Symbol;Acc:HGNC:8847]	no
ENSG00000178038	0.789	5.6e-18	1.1e-15	3	ALS2CL	46668995	46693704	ALS2 C-terminal like [Source:HGNC Symbol;Acc:HGNC:20605]	no
ENSG00000049323	-0.247	0.028	0.056	2	LTBP1	32946953	33399509	latent transforming growth factor beta binding protein 1 [Source:HGNC Symbol;Acc:HGNC:6714]	no
ENSG00000049449	-0.443	4.3e-05	0.00021	11	RCN1	32091074	32105722	reticulocalbin 1 [Source:HGNC Symbol;Acc:HGNC:9934]	no
ENSG00000049540	-0.069	0.544	0.635	7	ELN	74027789	74069907	elastin [Source:HGNC Symbol;Acc:HGNC:3327]	no
ENSG00000049541	-0.18	0.112	0.176	7	RFC2	74231499	74254458	replication factor C subunit 2 [Source:HGNC Symbol;Acc:HGNC:9970]	no
ENSG00000049618	-0.562	7.3e-08	8.8e-07	6	ARID1B	156776020	157210779	AT-rich interaction domain 1B [Source:HGNC Symbol;Acc:HGNC:18040]	no
ENSG00000049656	0.313	0.005	0.013	5	CLPTM1L	1317752	1345099	CLPTM1 like [Source:HGNC Symbol;Acc:HGNC:24308]	no
ENSG00000049759	-0.127	0.263	0.358	18	NEDD4L	58044226	58401540	NEDD4 like E3 ubiquitin protein ligase [Source:HGNC Symbol;Acc:HGNC:7728]	no
ENSG00000049769	-0.2	0.077	0.129	X	PPP1R3F	49269793	49301461	protein phosphatase 1 regulatory subunit 3F [Source:HGNC Symbol;Acc:HGNC:14944]	no
ENSG00000049860	-0.374	0.00068	0.002	5	HEXB	74640023	74722647	hexosaminidase subunit beta [Source:HGNC Symbol;Acc:HGNC:4879]	no
ENSG00000049883	0.026	0.818	0.863	5	PTCD2	72320367	72368395	pentatricopeptide repeat domain 2 [Source:HGNC Symbol;Acc:HGNC:25734]	no
ENSG00000050130	0.033	0.77	0.826	14	JKAMP	59484443	59505410	JNK1/MAPK8 associated membrane protein [Source:HGNC Symbol;Acc:HGNC:20184]	no
ENSG00000050165	0.333	0.003	0.007	11	DKK3	11956207	12009769	dickkopf WNT signaling pathway inhibitor 3 [Source:HGNC Symbol;Acc:HGNC:2893]	no
ENSG00000050327	0.178	0.118	0.184	7	ARHGEF5	144355288	144380632	Rho guanine nucleotide exchange factor 5 [Source:HGNC Symbol;Acc:HGNC:13209]	no
ENSG00000050344	-0.699	8.2e-13	4.6e-11	7	NFE2L3	26152198	26187137	NFE2 like bZIP transcription factor 3 [Source:HGNC Symbol;Acc:HGNC:7783]	no
ENSG00000050393	-0.651	8.2e-11	2.5e-09	6	MCUR1	13786557	13814568	mitochondrial calcium uniporter regulator 1 [Source:HGNC Symbol;Acc:HGNC:21097]	no
ENSG00000050405	0.374	0.00068	0.002	12	LIMA1	50175788	50283520	LIM domain and actin binding 1 [Source:HGNC Symbol;Acc:HGNC:24636]	no
ENSG00000274652	0.788	7e-18	1.4e-15	13	ENSG00000274652	51180178	51180967	novel transcript	no
ENSG00000050438	0.157	0.166	0.245	12	SLC4A8	51391317	51515763	solute carrier family 4 member 8 [Source:HGNC Symbol;Acc:HGNC:11034]	no
ENSG00000050555	0.164	0.149	0.224	9	LAMC3	131009174	131094473	laminin subunit gamma 3 [Source:HGNC Symbol;Acc:HGNC:6494]	no
ENSG00000050748	-0.422	0.00011	0.00046	5	MAPK9	180233143	180292099	mitogen-activated protein kinase 9 [Source:HGNC Symbol;Acc:HGNC:6886]	no
ENSG00000050767	-0.088	0.442	0.539	5	COL23A1	178237476	178590393	collagen type XXIII alpha 1 chain [Source:HGNC Symbol;Acc:HGNC:22990]	no
ENSG00000050820	0.271	0.016	0.034	16	BCAR1	75228181	75268053	BCAR1 scaffold protein, Cas family member [Source:HGNC Symbol;Acc:HGNC:971]	no
ENSG00000051009	0.097	0.396	0.497	11	FHIP1B	6211345	6234711	FHF complex subunit HOOK interacting protein 1B [Source:HGNC Symbol;Acc:HGNC:25378]	no
ENSG00000051108	-0.089	0.437	0.535	16	HERPUD1	56932142	56944864	homocysteine inducible ER protein with ubiquitin like domain 1 [Source:HGNC Symbol;Acc:HGNC:13744]	no
ENSG00000051128	-0.015	0.895	0.922	19	HOMER3	18929201	18941261	homer scaffold protein 3 [Source:HGNC Symbol;Acc:HGNC:17514]	no
ENSG00000051180	-0.379	0.00057	0.002	15	RAD51	40694774	40732340	RAD51 recombinase [Source:HGNC Symbol;Acc:HGNC:9817]	no
ENSG00000051341	-0.012	0.915	0.936	3	POLQ	121431431	121545988	DNA polymerase theta [Source:HGNC Symbol;Acc:HGNC:9186]	no
ENSG00000051382	-0.383	0.0005	0.002	3	PIK3CB	138652698	138834928	phosphatidylinositol-4,5-bisphosphate 3-kinase catalytic subunit beta [Source:HGNC Symbol;Acc:HGNC:8976]	no
ENSG00000051523	0.231	0.041	0.076	16	CYBA	88643275	88651083	cytochrome b-245 alpha chain [Source:HGNC Symbol;Acc:HGNC:2577]	no
ENSG00000051596	-0.639	2.3e-10	6.2e-09	5	THOC3	175917873	176034680	THO complex subunit 3 [Source:HGNC Symbol;Acc:HGNC:19072]	no
ENSG00000051620	-0.258	0.021	0.044	6	HEBP2	138403531	138422197	heme binding protein 2 [Source:HGNC Symbol;Acc:HGNC:15716]	no
ENSG00000051825	0.22	0.051	0.092	12	MPHOSPH9	123152320	123244014	M-phase phosphoprotein 9 [Source:HGNC Symbol;Acc:HGNC:7215]	no
ENSG00000052126	-0.503	2.3e-06	1.7e-05	12	PLEKHA5	19129669	19376400	pleckstrin homology domain containing A5 [Source:HGNC Symbol;Acc:HGNC:30036]	no
ENSG00000052344	0.266	0.018	0.037	16	PRSS8	31131433	31135727	serine protease 8 [Source:HGNC Symbol;Acc:HGNC:9491]	no
ENSG00000052723	-0.383	0.0005	0.002	1	SIKE1	114769479	114780685	suppressor of IKBKE 1 [Source:HGNC Symbol;Acc:HGNC:26119]	no
ENSG00000052749	-0.062	0.586	0.672	10	RRP12	97356358	97426076	ribosomal RNA processing 12 homolog [Source:HGNC Symbol;Acc:HGNC:29100]	no
ENSG00000052795	-0.404	0.00022	0.00089	4	FNIP2	158769026	158908050	folliculin interacting protein 2 [Source:HGNC Symbol;Acc:HGNC:29280]	no
ENSG00000052802	-0.211	0.062	0.107	4	MSMO1	165327667	165343164	methylsterol monooxygenase 1 [Source:HGNC Symbol;Acc:HGNC:10545]	no
ENSG00000052841	0.155	0.172	0.253	11	TTC17	43358920	43494933	tetratricopeptide repeat domain 17 [Source:HGNC Symbol;Acc:HGNC:25596]	no
ENSG00000053108	0.184	0.104	0.167	5	FSTL4	133196455	133612541	follistatin like 4 [Source:HGNC Symbol;Acc:HGNC:21389]	no
ENSG00000053254	-0.208	0.066	0.113	14	FOXN3	89124871	89619149	forkhead box N3 [Source:HGNC Symbol;Acc:HGNC:1928]	no
ENSG00000053371	-0.107	0.346	0.446	1	AKR7A2	19303965	19312144	aldo-keto reductase family 7 member A2 [Source:HGNC Symbol;Acc:HGNC:389]	no
ENSG00000053372	-0.057	0.616	0.697	1	MRTO4	19251805	19260128	MRT4 homolog, ribosome maturation factor [Source:HGNC Symbol;Acc:HGNC:18477]	no
ENSG00000053438	-0.316	0.005	0.012	20	NNAT	37521206	37523690	neuronatin [Source:HGNC Symbol;Acc:HGNC:7860]	no
ENSG00000053501	-0.449	3.4e-05	0.00017	19	USE1	17215346	17219829	unconventional SNARE in the ER 1 [Source:HGNC Symbol;Acc:HGNC:30882]	no
ENSG00000053524	0.282	0.012	0.026	3	MCF2L2	183178041	183428778	MCF.2 cell line derived transforming sequence-like 2 [Source:HGNC Symbol;Acc:HGNC:30319]	no
ENSG00000053770	-0.264	0.019	0.039	14	AP5M1	57268924	57298742	adaptor related protein complex 5 subunit mu 1 [Source:HGNC Symbol;Acc:HGNC:20192]	no
ENSG00000053900	-0.031	0.786	0.838	4	ANAPC4	25377263	25418498	anaphase promoting complex subunit 4 [Source:HGNC Symbol;Acc:HGNC:19990]	no
ENSG00000053918	-0.325	0.003	0.009	11	KCNQ1	2444684	2849105	potassium voltage-gated channel subfamily Q member 1 [Source:HGNC Symbol;Acc:HGNC:6294]	no
ENSG00000054116	0.463	1.7e-05	9.5e-05	1	TRAPPC3	36136570	36156053	trafficking protein particle complex subunit 3 [Source:HGNC Symbol;Acc:HGNC:19942]	no
ENSG00000054118	-0.13	0.254	0.348	1	THRAP3	36224432	36305357	thyroid hormone receptor associated protein 3 [Source:HGNC Symbol;Acc:HGNC:22964]	no
ENSG00000054148	-0.325	0.003	0.009	9	PHPT1	136848724	136851027	phosphohistidine phosphatase 1 [Source:HGNC Symbol;Acc:HGNC:30033]	no
ENSG00000106610	0.786	9.3e-18	1.8e-15	7	STAG3L4	67305987	67309715	stromal antigen 3-like 4 (pseudogene) [Source:HGNC Symbol;Acc:HGNC:33887]	no
ENSG00000054219	0.313	0.005	0.013	2	LY75	159803355	159904756	lymphocyte antigen 75 [Source:HGNC Symbol;Acc:HGNC:6729]	no
ENSG00000054267	-0.362	0.001	0.003	1	ARID4B	235131634	235328219	AT-rich interaction domain 4B [Source:HGNC Symbol;Acc:HGNC:15550]	no
ENSG00000231731	0.786	9.9e-18	1.9e-15	2	ENSG00000231731	127455394	127514623	novel transcript, antisense to IWS1	no
ENSG00000054282	0.328	0.003	0.009	1	SDCCAG8	243256034	243500091	SHH signaling and ciliogenesis regulator SDCCAG8 [Source:HGNC Symbol;Acc:HGNC:10671]	no
ENSG00000054356	-0.086	0.452	0.549	2	PTPRN	219289623	219309648	protein tyrosine phosphatase receptor type N [Source:HGNC Symbol;Acc:HGNC:9676]	no
ENSG00000054523	0.197	0.082	0.136	1	KIF1B	10210570	10381603	kinesin family member 1B [Source:HGNC Symbol;Acc:HGNC:16636]	no
ENSG00000054598	-0.035	0.761	0.819	6	FOXC1	1609915	1613897	forkhead box C1 [Source:HGNC Symbol;Acc:HGNC:3800]	no
ENSG00000054611	-0.654	6.1e-11	1.9e-09	22	TBC1D22A	46762617	47175699	TBC1 domain family member 22A [Source:HGNC Symbol;Acc:HGNC:1309]	no
ENSG00000054654	0.39	0.00038	0.001	14	SYNE2	63761899	64226433	spectrin repeat containing nuclear envelope protein 2 [Source:HGNC Symbol;Acc:HGNC:17084]	no
ENSG00000054690	0.146	0.198	0.284	14	PLEKHH1	67533290	67589612	pleckstrin homology, MyTH4 and FERM domain containing H1 [Source:HGNC Symbol;Acc:HGNC:17733]	no
ENSG00000054793	0.076	0.507	0.601	20	ATP9A	51596514	51768390	ATPase phospholipid transporting 9A (putative) [Source:HGNC Symbol;Acc:HGNC:13540]	no
ENSG00000054965	0.052	0.651	0.728	11	FAM168A	73400487	73598189	family with sequence similarity 168 member A [Source:HGNC Symbol;Acc:HGNC:28999]	no
ENSG00000054967	0.308	0.006	0.014	11	RELT	73376399	73397474	RELT TNF receptor [Source:HGNC Symbol;Acc:HGNC:13764]	no
ENSG00000054983	-0.301	0.007	0.017	14	GALC	87837820	87993665	galactosylceramidase [Source:HGNC Symbol;Acc:HGNC:4115]	no
ENSG00000055044	-0.32	0.004	0.011	2	NOP58	202265736	202303661	NOP58 ribonucleoprotein [Source:HGNC Symbol;Acc:HGNC:29926]	no
ENSG00000055070	0.107	0.348	0.448	1	SZRD1	16352575	16398145	SUZ RNA binding domain containing 1 [Source:HGNC Symbol;Acc:HGNC:30232]	no
ENSG00000055118	0.205	0.07	0.12	7	KCNH2	150944961	150978321	potassium voltage-gated channel subfamily H member 2 [Source:HGNC Symbol;Acc:HGNC:6251]	no
ENSG00000055130	-0.502	2.4e-06	1.8e-05	7	CUL1	148697914	148801110	cullin 1 [Source:HGNC Symbol;Acc:HGNC:2551]	no
ENSG00000055147	-0.537	3.4e-07	3.3e-06	5	FAM114A2	153990148	154038936	family with sequence similarity 114 member A2 [Source:HGNC Symbol;Acc:HGNC:1333]	no
ENSG00000055163	-0.321	0.004	0.01	5	CYFIP2	157266079	157395595	cytoplasmic FMR1 interacting protein 2 [Source:HGNC Symbol;Acc:HGNC:13760]	no
ENSG00000055208	-0.355	0.001	0.004	6	TAB2	149218641	149411613	TGF-beta activated kinase 1 (MAP3K7) binding protein 2 [Source:HGNC Symbol;Acc:HGNC:17075]	no
ENSG00000055211	-0.061	0.593	0.678	6	GINM1	149566294	149591748	glycosylated integral membrane protein 1 [Source:HGNC Symbol;Acc:HGNC:21074]	no
ENSG00000055332	-0.235	0.037	0.07	2	EIF2AK2	37099210	37157522	eukaryotic translation initiation factor 2 alpha kinase 2 [Source:HGNC Symbol;Acc:HGNC:9437]	no
ENSG00000055483	0.283	0.012	0.026	17	USP36	78787381	78841441	ubiquitin specific peptidase 36 [Source:HGNC Symbol;Acc:HGNC:20062]	no
ENSG00000055609	0.313	0.005	0.013	7	KMT2C	152134922	152436644	lysine methyltransferase 2C [Source:HGNC Symbol;Acc:HGNC:13726]	no
ENSG00000055732	-0.183	0.106	0.169	1	MCOLN3	85018082	85048500	mucolipin TRP cation channel 3 [Source:HGNC Symbol;Acc:HGNC:13358]	no
ENSG00000055917	-0.549	1.6e-07	1.8e-06	2	PUM2	20248691	20352234	pumilio RNA binding family member 2 [Source:HGNC Symbol;Acc:HGNC:14958]	no
ENSG00000055950	0.481	7.3e-06	4.6e-05	10	MRPL43	100969458	100987515	mitochondrial ribosomal protein L43 [Source:HGNC Symbol;Acc:HGNC:14517]	no
ENSG00000056050	-0.401	0.00025	0.00097	4	HPF1	169729470	169757944	histone PARylation factor 1 [Source:HGNC Symbol;Acc:HGNC:26051]	no
ENSG00000056097	-0.528	5.6e-07	5.1e-06	5	ZFR	32354350	32444740	zinc finger RNA binding protein [Source:HGNC Symbol;Acc:HGNC:17277]	no
ENSG00000056277	0.131	0.252	0.345	X	ZNF280C	130202707	130268899	zinc finger protein 280C [Source:HGNC Symbol;Acc:HGNC:25955]	no
ENSG00000056291	-0.055	0.628	0.709	4	NPFFR2	72031902	72148305	neuropeptide FF receptor 2 [Source:HGNC Symbol;Acc:HGNC:4525]	no
ENSG00000056487	0.221	0.05	0.09	22	PHF21B	44881162	45010005	PHD finger protein 21B [Source:HGNC Symbol;Acc:HGNC:25161]	no
ENSG00000056558	0.084	0.46	0.556	9	TRAF1	120902393	120929173	TNF receptor associated factor 1 [Source:HGNC Symbol;Acc:HGNC:12031]	no
ENSG00000056586	-0.291	0.009	0.022	9	RC3H2	122844556	122905359	ring finger and CCCH-type domains 2 [Source:HGNC Symbol;Acc:HGNC:21461]	no
ENSG00000056736	0.403	0.00023	0.00091	3	IL17RB	53846568	53865794	interleukin 17 receptor B [Source:HGNC Symbol;Acc:HGNC:18015]	no
ENSG00000056972	0.387	0.00043	0.002	6	TRAF3IP2	111555381	111606906	TRAF3 interacting protein 2 [Source:HGNC Symbol;Acc:HGNC:1343]	no
ENSG00000056998	-0.724	4.5e-14	3.8e-12	X	GYG2	2828822	2882820	glycogenin 2 [Source:HGNC Symbol;Acc:HGNC:4700]	no
ENSG00000057019	-0.078	0.495	0.59	3	DCBLD2	98795941	98901695	discoidin, CUB and LCCL domain containing 2 [Source:HGNC Symbol;Acc:HGNC:24627]	no
ENSG00000057252	0.264	0.019	0.039	1	SOAT1	179293714	179358680	sterol O-acyltransferase 1 [Source:HGNC Symbol;Acc:HGNC:11177]	no
ENSG00000057294	-0.246	0.029	0.056	12	PKP2	32790745	32896777	plakophilin 2 [Source:HGNC Symbol;Acc:HGNC:9024]	no
ENSG00000057608	-0.461	1.9e-05	0.00011	10	GDI2	5765223	5842132	GDP dissociation inhibitor 2 [Source:HGNC Symbol;Acc:HGNC:4227]	no
ENSG00000057663	-0.489	4.7e-06	3.1e-05	6	ATG5	106045423	106325791	autophagy related 5 [Source:HGNC Symbol;Acc:HGNC:589]	no
ENSG00000057704	0.321	0.004	0.01	12	TMCC3	94567122	94650557	transmembrane and coiled-coil domain family 3 [Source:HGNC Symbol;Acc:HGNC:29199]	no
ENSG00000057757	-0.418	0.00013	0.00054	1	PITHD1	23778418	23788232	PITH domain containing 1 [Source:HGNC Symbol;Acc:HGNC:25022]	no
ENSG00000057935	-0.665	2.4e-11	8.6e-10	2	MTA3	42494569	42756947	metastasis associated 1 family member 3 [Source:HGNC Symbol;Acc:HGNC:23784]	no
ENSG00000058056	-0.434	6.4e-05	0.0003	3	USP13	179653032	179804366	ubiquitin specific peptidase 13 [Source:HGNC Symbol;Acc:HGNC:12611]	no
ENSG00000058063	0.095	0.405	0.505	3	ATP11B	182793503	182921629	ATPase phospholipid transporting 11B (putative) [Source:HGNC Symbol;Acc:HGNC:13553]	no
ENSG00000058085	-0.391	0.00037	0.001	1	LAMC2	183186238	183245127	laminin subunit gamma 2 [Source:HGNC Symbol;Acc:HGNC:6493]	no
ENSG00000058091	-0.219	0.053	0.094	7	CDK14	90466424	91210590	cyclin dependent kinase 14 [Source:HGNC Symbol;Acc:HGNC:8883]	no
ENSG00000058262	-0.034	0.768	0.824	3	SEC61A1	128051641	128071705	SEC61 translocon subunit alpha 1 [Source:HGNC Symbol;Acc:HGNC:18276]	no
ENSG00000058272	-0.404	0.00023	0.00089	12	PPP1R12A	79773563	79935460	protein phosphatase 1 regulatory subunit 12A [Source:HGNC Symbol;Acc:HGNC:7618]	no
ENSG00000058453	0.489	4.7e-06	3.2e-05	1	CROCC	16740273	16972964	ciliary rootlet coiled-coil, rootletin [Source:HGNC Symbol;Acc:HGNC:21299]	no
ENSG00000155093	0.784	1.3e-17	2.4e-15	7	PTPRN2	157539056	158587823	protein tyrosine phosphatase receptor type N2 [Source:HGNC Symbol;Acc:HGNC:9677]	no
ENSG00000174500	0.784	1.3e-17	2.4e-15	3	GCSAM	112120839	112133270	germinal center associated signaling and motility [Source:HGNC Symbol;Acc:HGNC:20253]	no
ENSG00000058729	-0.291	0.009	0.022	5	RIOK2	97160867	97183247	RIO kinase 2 [Source:HGNC Symbol;Acc:HGNC:18999]	no
ENSG00000058799	-0.654	6.4e-11	2e-09	1	YIPF1	53851719	53889798	Yip1 domain family member 1 [Source:HGNC Symbol;Acc:HGNC:25231]	no
ENSG00000058804	-0.523	7.8e-07	6.7e-06	1	NDC1	53765478	53838463	NDC1 transmembrane nucleoporin [Source:HGNC Symbol;Acc:HGNC:25525]	no
ENSG00000059122	0.029	0.801	0.851	16	FLYWCH1	2911931	2951208	FLYWCH-type zinc finger 1 [Source:HGNC Symbol;Acc:HGNC:25404]	no
ENSG00000059145	-0.014	0.903	0.927	16	UNKL	1363205	1414751	unk like zinc finger [Source:HGNC Symbol;Acc:HGNC:14184]	no
ENSG00000059378	0.046	0.689	0.76	7	PARP12	140023749	140062951	poly(ADP-ribose) polymerase family member 12 [Source:HGNC Symbol;Acc:HGNC:21919]	no
ENSG00000059573	0.19	0.094	0.153	10	ALDH18A1	95605941	95656711	aldehyde dehydrogenase 18 family member A1 [Source:HGNC Symbol;Acc:HGNC:9722]	no
ENSG00000059588	0.254	0.024	0.048	1	TARBP1	234391313	234479179	TAR (HIV-1) RNA binding protein 1 [Source:HGNC Symbol;Acc:HGNC:11568]	no
ENSG00000059691	-0.134	0.238	0.331	4	GATB	151670504	151761007	glutamyl-tRNA amidotransferase subunit B [Source:HGNC Symbol;Acc:HGNC:8849]	no
ENSG00000059728	-0.302	0.007	0.017	2	MXD1	69897688	69942945	MAX dimerization protein 1 [Source:HGNC Symbol;Acc:HGNC:6761]	no
ENSG00000059758	-0.497	3.2e-06	2.3e-05	12	CDK17	96278261	96400480	cyclin dependent kinase 17 [Source:HGNC Symbol;Acc:HGNC:8750]	no
ENSG00000059769	-0.502	2.5e-06	1.8e-05	9	DNAJC25	111631334	111654351	DnaJ heat shock protein family (Hsp40) member C25 [Source:HGNC Symbol;Acc:HGNC:34187]	no
ENSG00000059804	-0.609	2.7e-09	5e-08	12	SLC2A3	7919230	7936187	solute carrier family 2 member 3 [Source:HGNC Symbol;Acc:HGNC:11007]	no
ENSG00000059915	0.434	6.5e-05	0.0003	10	PSD	102402617	102421539	pleckstrin and Sec7 domain containing [Source:HGNC Symbol;Acc:HGNC:9507]	no
ENSG00000060069	0.222	0.049	0.089	18	CTDP1	79679803	79754503	CTD phosphatase subunit 1 [Source:HGNC Symbol;Acc:HGNC:2498]	no
ENSG00000060138	-0.233	0.039	0.073	12	YBX3	10699089	10723323	Y-box binding protein 3 [Source:HGNC Symbol;Acc:HGNC:2428]	no
ENSG00000060237	0.22	0.051	0.092	12	WNK1	752579	911452	WNK lysine deficient protein kinase 1 [Source:HGNC Symbol;Acc:HGNC:14540]	no
ENSG00000060339	-0.261	0.02	0.042	10	CCAR1	68721012	68792377	cell division cycle and apoptosis regulator 1 [Source:HGNC Symbol;Acc:HGNC:24236]	no
ENSG00000060491	0.409	0.00018	0.00074	20	OGFR	62804835	62814000	opioid growth factor receptor [Source:HGNC Symbol;Acc:HGNC:15768]	no
ENSG00000060642	0.296	0.008	0.019	1	PIGV	26787054	26800659	phosphatidylinositol glycan anchor biosynthesis class V [Source:HGNC Symbol;Acc:HGNC:26031]	no
ENSG00000060656	0.297	0.008	0.019	1	PTPRU	29236516	29326813	protein tyrosine phosphatase receptor type U [Source:HGNC Symbol;Acc:HGNC:9683]	no
ENSG00000060688	-0.565	5.7e-08	7.2e-07	1	SNRNP40	31259568	31296788	small nuclear ribonucleoprotein U5 subunit 40 [Source:HGNC Symbol;Acc:HGNC:30857]	no
ENSG00000060718	0.448	3.5e-05	0.00018	1	COL11A1	102876467	103108872	collagen type XI alpha 1 chain [Source:HGNC Symbol;Acc:HGNC:2186]	no
ENSG00000060749	-0.046	0.69	0.76	11	QSER1	32892811	32993316	glutamine and serine rich 1 [Source:HGNC Symbol;Acc:HGNC:26154]	no
ENSG00000060762	-0.199	0.079	0.132	6	MPC1	166364919	166383013	mitochondrial pyruvate carrier 1 [Source:HGNC Symbol;Acc:HGNC:21606]	no
ENSG00000060971	0.254	0.024	0.048	3	ACAA1	38103129	38137242	acetyl-CoA acyltransferase 1 [Source:HGNC Symbol;Acc:HGNC:82]	no
ENSG00000060982	-0.279	0.013	0.028	12	BCAT1	24810024	24949101	branched chain amino acid transaminase 1 [Source:HGNC Symbol;Acc:HGNC:976]	no
ENSG00000061273	0.229	0.042	0.078	12	HDAC7	47782722	47833132	histone deacetylase 7 [Source:HGNC Symbol;Acc:HGNC:14067]	no
ENSG00000061337	-0.085	0.459	0.555	8	LZTS1	20246165	20303963	leucine zipper tumor suppressor 1 [Source:HGNC Symbol;Acc:HGNC:13861]	no
ENSG00000061656	-0.143	0.208	0.296	20	SPAG4	35615829	35621094	sperm associated antigen 4 [Source:HGNC Symbol;Acc:HGNC:11214]	no
ENSG00000061676	-0.191	0.092	0.151	2	NCKAP1	182909115	183038858	NCK associated protein 1 [Source:HGNC Symbol;Acc:HGNC:7666]	no
ENSG00000061794	-0.32	0.004	0.011	12	MRPS35	27710822	27756295	mitochondrial ribosomal protein S35 [Source:HGNC Symbol;Acc:HGNC:16635]	no
ENSG00000061918	-0.2	0.078	0.13	4	GUCY1B1	155758992	155807811	guanylate cyclase 1 soluble subunit beta 1 [Source:HGNC Symbol;Acc:HGNC:4687]	no
ENSG00000188385	0.784	1.3e-17	2.4e-15	10	JAKMIP3	132036336	132184858	Janus kinase and microtubule interacting protein 3 [Source:HGNC Symbol;Acc:HGNC:23523]	no
ENSG00000203362	0.784	1.3e-17	2.4e-15	6	POLH-AS1	43588230	43591362	POLH antisense RNA 1 [Source:HGNC Symbol;Acc:HGNC:40459]	no
ENSG00000061987	-0.042	0.714	0.781	12	MON2	62466817	62600476	MON2 homolog, regulator of endosome-to-Golgi trafficking [Source:HGNC Symbol;Acc:HGNC:29177]	no
ENSG00000062038	-0.436	5.9e-05	0.00028	16	CDH3	68636189	68727468	cadherin 3 [Source:HGNC Symbol;Acc:HGNC:1762]	no
ENSG00000062194	-0.538	3.2e-07	3.1e-06	5	GPBP1	57173948	57264679	GC-rich promoter binding protein 1 [Source:HGNC Symbol;Acc:HGNC:29520]	no
ENSG00000062282	0.272	0.015	0.033	11	DGAT2	75759512	75801535	diacylglycerol O-acyltransferase 2 [Source:HGNC Symbol;Acc:HGNC:16940]	no
ENSG00000062370	-0.039	0.735	0.797	19	ZNF112	44326555	44367217	zinc finger protein 112 [Source:HGNC Symbol;Acc:HGNC:12892]	no
ENSG00000062485	-0.209	0.064	0.111	12	CS	56271699	56300391	citrate synthase [Source:HGNC Symbol;Acc:HGNC:2422]	no
ENSG00000062598	0.39	0.00039	0.001	20	ELMO2	46366050	46432985	engulfment and cell motility 2 [Source:HGNC Symbol;Acc:HGNC:17233]	no
ENSG00000062650	-0.476	9.2e-06	5.6e-05	10	WAPL	86435256	86521792	WAPL cohesin release factor [Source:HGNC Symbol;Acc:HGNC:23293]	no
ENSG00000062716	-0.64	2.1e-10	5.8e-09	17	VMP1	59707192	59842255	vacuole membrane protein 1 [Source:HGNC Symbol;Acc:HGNC:29559]	no
ENSG00000062725	-0.256	0.023	0.046	17	APPBP2	60443158	60526242	amyloid beta precursor protein binding protein 2 [Source:HGNC Symbol;Acc:HGNC:622]	no
ENSG00000062822	0.372	0.00075	0.002	19	POLD1	50384204	50418018	DNA polymerase delta 1, catalytic subunit [Source:HGNC Symbol;Acc:HGNC:9175]	no
ENSG00000063015	0.153	0.178	0.26	17	SEZ6	28954901	29006440	seizure related 6 homolog [Source:HGNC Symbol;Acc:HGNC:15955]	no
ENSG00000063046	-0.32	0.004	0.011	12	EIF4B	53006282	53042215	eukaryotic translation initiation factor 4B [Source:HGNC Symbol;Acc:HGNC:3285]	no
ENSG00000272578	0.783	1.6e-17	2.7e-15	22	ENSG00000272578	23659869	23717295	glucuronidase, beta (GUSB) pseudogene	no
ENSG00000063169	0.219	0.053	0.094	19	BICRA	47608196	47703277	BRD4 interacting chromatin remodeling complex associated protein [Source:HGNC Symbol;Acc:HGNC:4332]	no
ENSG00000063176	-0.069	0.549	0.64	19	SPHK2	48619291	48630717	sphingosine kinase 2 [Source:HGNC Symbol;Acc:HGNC:18859]	no
ENSG00000063177	0.133	0.242	0.334	19	RPL18	48615328	48619184	ribosomal protein L18 [Source:HGNC Symbol;Acc:HGNC:10310]	no
ENSG00000063180	-0.287	0.01	0.024	19	CA11	48637946	48646187	carbonic anhydrase 11 [Source:HGNC Symbol;Acc:HGNC:1370]	no
ENSG00000063241	0.006	0.955	0.966	19	ISOC2	55452985	55462343	isochorismatase domain containing 2 [Source:HGNC Symbol;Acc:HGNC:26278]	no
ENSG00000063244	0.383	0.00049	0.002	19	U2AF2	55654146	55674716	U2 small nuclear RNA auxiliary factor 2 [Source:HGNC Symbol;Acc:HGNC:23156]	no
ENSG00000063245	0.268	0.017	0.036	19	EPN1	55675226	55709858	epsin 1 [Source:HGNC Symbol;Acc:HGNC:21604]	no
ENSG00000063322	-0.327	0.003	0.009	19	MED29	39391303	39400641	mediator complex subunit 29 [Source:HGNC Symbol;Acc:HGNC:23074]	no
ENSG00000063587	0.241	0.033	0.063	X	ZNF275	153334147	153360110	zinc finger protein 275 [Source:HGNC Symbol;Acc:HGNC:13069]	no
ENSG00000063601	-0.471	1.2e-05	7e-05	X	MTMR1	150692971	150765108	myotubularin related protein 1 [Source:HGNC Symbol;Acc:HGNC:7449]	no
ENSG00000063660	0.193	0.088	0.144	2	GPC1	240435663	240468076	glypican 1 [Source:HGNC Symbol;Acc:HGNC:4449]	no
ENSG00000165757	0.78	2.5e-17	4.2e-15	10	JCAD	30012803	30115494	junctional cadherin 5 associated [Source:HGNC Symbol;Acc:HGNC:29283]	no
ENSG00000063854	0.2	0.077	0.13	16	HAGH	1795620	1827157	hydroxyacylglutathione hydrolase [Source:HGNC Symbol;Acc:HGNC:4805]	no
ENSG00000063978	-0.134	0.24	0.332	4	RNF4	2462220	2515857	ring finger protein 4 [Source:HGNC Symbol;Acc:HGNC:10067]	no
ENSG00000064012	-0.252	0.025	0.05	2	CASP8	201233443	201361836	caspase 8 [Source:HGNC Symbol;Acc:HGNC:1509]	no
ENSG00000064042	0.4	0.00026	0.001	4	LIMCH1	41359607	41700044	LIM and calponin homology domains 1 [Source:HGNC Symbol;Acc:HGNC:29191]	no
ENSG00000064102	0.156	0.169	0.249	12	INTS13	26905181	26938326	integrator complex subunit 13 [Source:HGNC Symbol;Acc:HGNC:20174]	no
ENSG00000064115	-0.371	0.00077	0.003	12	TM7SF3	26971579	27014434	transmembrane 7 superfamily member 3 [Source:HGNC Symbol;Acc:HGNC:23049]	no
ENSG00000064199	-0.39	0.00038	0.001	11	SPA17	124673844	124697518	sperm autoantigenic protein 17 [Source:HGNC Symbol;Acc:HGNC:11210]	no
ENSG00000064225	0.126	0.269	0.364	3	ST3GAL6	98732236	98821201	ST3 beta-galactoside alpha-2,3-sialyltransferase 6 [Source:HGNC Symbol;Acc:HGNC:18080]	no
ENSG00000287392	0.78	2.4e-17	4.1e-15	4	ENSG00000287392	92183235	92265316	novel transcript	no
ENSG00000064300	-0.19	0.094	0.153	17	NGFR	49495293	49515008	nerve growth factor receptor [Source:HGNC Symbol;Acc:HGNC:7809]	no
ENSG00000064309	0.251	0.026	0.051	11	CDON	125955796	126063335	cell adhesion associated, oncogene regulated [Source:HGNC Symbol;Acc:HGNC:17104]	no
ENSG00000064313	-0.476	9.5e-06	5.8e-05	8	TAF2	119730774	119832863	TATA-box binding protein associated factor 2 [Source:HGNC Symbol;Acc:HGNC:11536]	no
ENSG00000064393	-0.086	0.45	0.547	7	HIPK2	139561570	139777998	homeodomain interacting protein kinase 2 [Source:HGNC Symbol;Acc:HGNC:14402]	no
ENSG00000064419	-0.495	3.5e-06	2.4e-05	7	TNPO3	128954180	129055173	transportin 3 [Source:HGNC Symbol;Acc:HGNC:17103]	no
ENSG00000064490	-0.189	0.094	0.153	19	RFXANK	19192229	19201869	regulatory factor X associated ankyrin containing protein [Source:HGNC Symbol;Acc:HGNC:9987]	no
ENSG00000064545	0.291	0.009	0.022	19	TMEM161A	19119169	19138513	transmembrane protein 161A [Source:HGNC Symbol;Acc:HGNC:26020]	no
ENSG00000064547	-0.031	0.788	0.84	19	LPAR2	19623655	19628930	lysophosphatidic acid receptor 2 [Source:HGNC Symbol;Acc:HGNC:3168]	no
ENSG00000064601	-0.153	0.178	0.26	20	CTSA	45890144	45898949	cathepsin A [Source:HGNC Symbol;Acc:HGNC:9251]	no
ENSG00000064607	0.474	1e-05	6.2e-05	19	SUGP2	18990888	19034023	SURP and G-patch domain containing 2 [Source:HGNC Symbol;Acc:HGNC:18641]	no
ENSG00000064651	-0.015	0.895	0.922	5	SLC12A2	128083766	128189677	solute carrier family 12 member 2 [Source:HGNC Symbol;Acc:HGNC:10911]	no
ENSG00000064652	-0.623	8.6e-10	1.9e-08	5	SNX24	122843439	123029354	sorting nexin 24 [Source:HGNC Symbol;Acc:HGNC:21533]	no
ENSG00000064666	0.257	0.022	0.045	19	CNN2	1026586	1039068	calponin 2 [Source:HGNC Symbol;Acc:HGNC:2156]	no
ENSG00000197467	0.774	6.2e-17	1e-14	10	COL13A1	69801880	69964275	collagen type XIII alpha 1 chain [Source:HGNC Symbol;Acc:HGNC:2190]	no
ENSG00000064692	0.246	0.029	0.056	5	SNCAIP	122311354	122464219	synuclein alpha interacting protein [Source:HGNC Symbol;Acc:HGNC:11139]	no
ENSG00000064703	-0.632	4.2e-10	1e-08	1	DDX20	111754832	111775602	DEAD-box helicase 20 [Source:HGNC Symbol;Acc:HGNC:2743]	no
ENSG00000064726	-0.548	1.7e-07	1.8e-06	15	BTBD1	83016423	83067252	BTB domain containing 1 [Source:HGNC Symbol;Acc:HGNC:1120]	no
ENSG00000064763	-0.317	0.004	0.011	12	FAR2	29149016	29341121	fatty acyl-CoA reductase 2 [Source:HGNC Symbol;Acc:HGNC:25531]	no
ENSG00000064932	0.256	0.023	0.046	19	SBNO2	1107637	1174268	strawberry notch homolog 2 [Source:HGNC Symbol;Acc:HGNC:29158]	no
ENSG00000064933	-0.301	0.007	0.017	2	PMS1	189784085	189877629	PMS1 homolog 1, mismatch repair system component [Source:HGNC Symbol;Acc:HGNC:9121]	no
ENSG00000064961	0.21	0.063	0.109	19	HMG20B	3572777	3579088	high mobility group 20B [Source:HGNC Symbol;Acc:HGNC:5002]	no
ENSG00000064989	0.478	8.4e-06	5.2e-05	2	CALCRL	187341964	187448460	calcitonin receptor like receptor [Source:HGNC Symbol;Acc:HGNC:16709]	no
ENSG00000064995	-0.02	0.863	0.898	6	TAF11	34877462	34889192	TATA-box binding protein associated factor 11 [Source:HGNC Symbol;Acc:HGNC:11544]	no
ENSG00000064999	-0.286	0.011	0.024	6	ANKS1A	34889255	35091406	ankyrin repeat and sterile alpha motif domain containing 1A [Source:HGNC Symbol;Acc:HGNC:20961]	no
ENSG00000065000	0.093	0.415	0.515	19	AP3D1	2100988	2164468	adaptor related protein complex 3 subunit delta 1 [Source:HGNC Symbol;Acc:HGNC:568]	no
ENSG00000065029	-0.145	0.203	0.29	6	ZNF76	35258909	35295985	zinc finger protein 76 [Source:HGNC Symbol;Acc:HGNC:13149]	no
ENSG00000065054	0.477	9e-06	5.5e-05	16	SLC9A3R2	2025356	2039026	SLC9A3 regulator 2 [Source:HGNC Symbol;Acc:HGNC:11076]	no
ENSG00000065057	0.358	0.001	0.004	16	NTHL1	2039815	2047866	nth like DNA glycosylase 1 [Source:HGNC Symbol;Acc:HGNC:8028]	no
ENSG00000065060	-0.178	0.117	0.183	6	BLTP3A	34792083	34877514	bridge-like lipid transfer protein family member 3A [Source:HGNC Symbol;Acc:HGNC:21216]	no
ENSG00000065135	-0.67	1.5e-11	5.7e-10	1	GNAI3	109548615	109600195	G protein subunit alpha i3 [Source:HGNC Symbol;Acc:HGNC:4387]	no
ENSG00000065150	-0.141	0.217	0.306	13	IPO5	97953658	98024296	importin 5 [Source:HGNC Symbol;Acc:HGNC:6402]	no
ENSG00000065154	0.163	0.15	0.225	10	OAT	124397303	124418976	ornithine aminotransferase [Source:HGNC Symbol;Acc:HGNC:8091]	no
ENSG00000065183	-0.601	4.7e-09	8.3e-08	1	WDR3	117929720	117966543	WD repeat domain 3 [Source:HGNC Symbol;Acc:HGNC:12755]	no
ENSG00000065243	-0.173	0.126	0.195	1	PKN2	88684222	88836255	protein kinase N2 [Source:HGNC Symbol;Acc:HGNC:9406]	no
ENSG00000065268	0.184	0.105	0.168	19	WDR18	984332	998438	WD repeat domain 18 [Source:HGNC Symbol;Acc:HGNC:17956]	no
ENSG00000065308	0.143	0.207	0.295	6	TRAM2	52497408	52577060	translocation associated membrane protein 2 [Source:HGNC Symbol;Acc:HGNC:16855]	no
ENSG00000065320	-0.032	0.778	0.832	17	NTN1	9021510	9244000	netrin 1 [Source:HGNC Symbol;Acc:HGNC:8029]	no
ENSG00000065328	-0.175	0.123	0.192	10	MCM10	13161558	13211110	minichromosome maintenance 10 replication initiation factor [Source:HGNC Symbol;Acc:HGNC:18043]	no
ENSG00000065357	-0.142	0.212	0.3	12	DGKA	55927319	55954027	diacylglycerol kinase alpha [Source:HGNC Symbol;Acc:HGNC:2849]	no
ENSG00000065361	0.01	0.93	0.947	12	ERBB3	56076799	56103505	erb-b2 receptor tyrosine kinase 3 [Source:HGNC Symbol;Acc:HGNC:3431]	no
ENSG00000065427	0.132	0.247	0.34	16	KARS1	75627474	75648643	lysyl-tRNA synthetase 1 [Source:HGNC Symbol;Acc:HGNC:6215]	no
ENSG00000065457	-0.19	0.093	0.151	16	ADAT1	75596868	75623300	adenosine deaminase tRNA specific 1 [Source:HGNC Symbol;Acc:HGNC:228]	no
ENSG00000065485	0.251	0.026	0.052	3	PDIA5	123067025	123225227	protein disulfide isomerase family A member 5 [Source:HGNC Symbol;Acc:HGNC:24811]	no
ENSG00000065491	-0.557	9.7e-08	1.1e-06	6	TBC1D22B	37257772	37332970	TBC1 domain family member 22B [Source:HGNC Symbol;Acc:HGNC:21602]	no
ENSG00000065518	0.002	0.986	0.989	3	NDUFB4	120596328	120602507	NADH:ubiquinone oxidoreductase subunit B4 [Source:HGNC Symbol;Acc:HGNC:7699]	no
ENSG00000065526	0.096	0.402	0.502	1	SPEN	15836095	15940456	spen family transcriptional repressor [Source:HGNC Symbol;Acc:HGNC:17575]	no
ENSG00000065534	0.413	0.00015	0.00063	3	MYLK	123610049	123884332	myosin light chain kinase [Source:HGNC Symbol;Acc:HGNC:7590]	no
ENSG00000065548	-0.504	2.2e-06	1.6e-05	2	ZC3H15	186486253	186509361	zinc finger CCCH-type containing 15 [Source:HGNC Symbol;Acc:HGNC:29528]	no
ENSG00000065559	-0.488	5e-06	3.3e-05	17	MAP2K4	12020829	12143830	mitogen-activated protein kinase kinase 4 [Source:HGNC Symbol;Acc:HGNC:6844]	no
ENSG00000065600	0.092	0.422	0.522	1	PACC1	212363928	212414901	proton activated chloride channel 1 [Source:HGNC Symbol;Acc:HGNC:25593]	no
ENSG00000065613	-0.501	2.6e-06	1.9e-05	10	SLK	103967140	104029233	STE20 like kinase [Source:HGNC Symbol;Acc:HGNC:11088]	no
ENSG00000065615	0.021	0.851	0.888	6	CYB5R4	83859656	83967423	cytochrome b5 reductase 4 [Source:HGNC Symbol;Acc:HGNC:20147]	no
ENSG00000065621	-0.667	1.9e-11	7e-10	10	GSTO2	104268873	104304950	glutathione S-transferase omega 2 [Source:HGNC Symbol;Acc:HGNC:23064]	no
ENSG00000246250	0.774	6.4e-17	1e-14	11	ENSG00000246250	43827517	43880726	novel transcript	no
ENSG00000065675	0.179	0.115	0.181	10	PRKCQ	6427143	6580301	protein kinase C theta [Source:HGNC Symbol;Acc:HGNC:9410]	no
ENSG00000065717	0.243	0.031	0.06	19	TLE2	2997639	3047635	TLE family member 2, transcriptional corepressor [Source:HGNC Symbol;Acc:HGNC:11838]	no
ENSG00000065802	0.145	0.201	0.288	2	ASB1	238426742	238452250	ankyrin repeat and SOCS box containing 1 [Source:HGNC Symbol;Acc:HGNC:16011]	no
ENSG00000065809	-0.13	0.255	0.349	10	FAM107B	14518557	14774897	family with sequence similarity 107 member B [Source:HGNC Symbol;Acc:HGNC:23726]	no
ENSG00000065833	0.099	0.385	0.486	6	ME1	83210402	83431051	malic enzyme 1 [Source:HGNC Symbol;Acc:HGNC:6983]	no
ENSG00000065882	-0.291	0.009	0.022	4	TBC1D1	37891084	38139175	TBC1 domain family member 1 [Source:HGNC Symbol;Acc:HGNC:11578]	no
ENSG00000065883	-0.636	3.1e-10	8e-09	7	CDK13	39950121	40099580	cyclin dependent kinase 13 [Source:HGNC Symbol;Acc:HGNC:1733]	no
ENSG00000065911	0.101	0.375	0.476	2	MTHFD2	74186172	74217565	methylenetetrahydrofolate dehydrogenase (NADP+ dependent) 2, methenyltetrahydrofolate cyclohydrolase [Source:HGNC Symbol;Acc:HGNC:7434]	no
ENSG00000065923	-0.394	0.00033	0.001	X	SLC9A7	46599251	46759118	solute carrier family 9 member A7 [Source:HGNC Symbol;Acc:HGNC:17123]	no
ENSG00000065970	-0.205	0.071	0.12	12	FOXJ2	8032716	8055517	forkhead box J2 [Source:HGNC Symbol;Acc:HGNC:24818]	no
ENSG00000065978	-0.116	0.31	0.408	1	YBX1	42682418	42703805	Y-box binding protein 1 [Source:HGNC Symbol;Acc:HGNC:8014]	no
ENSG00000065989	0.061	0.591	0.677	19	PDE4A	10416773	10469630	phosphodiesterase 4A [Source:HGNC Symbol;Acc:HGNC:8780]	no
ENSG00000066027	-0.189	0.096	0.155	1	PPP2R5A	212285410	212361853	protein phosphatase 2 regulatory subunit B'alpha [Source:HGNC Symbol;Acc:HGNC:9309]	no
ENSG00000066032	-0.421	0.00011	0.00049	2	CTNNA2	79185231	80648861	catenin alpha 2 [Source:HGNC Symbol;Acc:HGNC:2510]	no
ENSG00000066044	-0.119	0.297	0.395	19	ELAVL1	7958573	8005659	ELAV like RNA binding protein 1 [Source:HGNC Symbol;Acc:HGNC:3312]	no
ENSG00000066056	0.313	0.005	0.013	1	TIE1	43300982	43323108	tyrosine kinase with immunoglobulin like and EGF like domains 1 [Source:HGNC Symbol;Acc:HGNC:11809]	no
ENSG00000066084	-0.434	6.5e-05	0.0003	12	DIP2B	50504985	50748657	disco interacting protein 2 homolog B [Source:HGNC Symbol;Acc:HGNC:29284]	no
ENSG00000066117	-0.343	0.002	0.006	12	SMARCD1	50085200	50100707	SWI/SNF related, matrix associated, actin dependent regulator of chromatin, subfamily d, member 1 [Source:HGNC Symbol;Acc:HGNC:11106]	no
ENSG00000066135	-0.582	1.9e-08	2.8e-07	1	KDM4A	43650149	43705518	lysine demethylase 4A [Source:HGNC Symbol;Acc:HGNC:22978]	no
ENSG00000066136	-0.332	0.003	0.008	1	NFYC	40691648	40771603	nuclear transcription factor Y subunit gamma [Source:HGNC Symbol;Acc:HGNC:7806]	no
ENSG00000066248	0.325	0.003	0.009	2	NGEF	232878701	233013256	neuronal guanine nucleotide exchange factor [Source:HGNC Symbol;Acc:HGNC:7807]	no
ENSG00000066279	0.207	0.067	0.115	1	ASPM	197084121	197146694	assembly factor for spindle microtubules [Source:HGNC Symbol;Acc:HGNC:19048]	no
ENSG00000204520	0.771	9.9e-17	1.5e-14	6	MICA	31399784	31415315	MHC class I polypeptide-related sequence A [Source:HGNC Symbol;Acc:HGNC:7090]	no
ENSG00000066379	-0.353	0.001	0.004	6	POLR1H	30058899	30064909	RNA polymerase I subunit H [Source:HGNC Symbol;Acc:HGNC:13182]	no
ENSG00000066382	0.23	0.042	0.077	11	MPPED2	30384493	30586872	metallophosphoesterase domain containing 2 [Source:HGNC Symbol;Acc:HGNC:1180]	no
ENSG00000066422	-0.385	0.00045	0.002	3	ZBTB11	101648889	101677135	zinc finger and BTB domain containing 11 [Source:HGNC Symbol;Acc:HGNC:16740]	no
ENSG00000066427	0.048	0.675	0.747	14	ATXN3	92044496	92106621	ataxin 3 [Source:HGNC Symbol;Acc:HGNC:7106]	no
ENSG00000066455	-0.192	0.09	0.147	14	GOLGA5	92794305	92839947	golgin A5 [Source:HGNC Symbol;Acc:HGNC:4428]	no
ENSG00000066468	-0.195	0.085	0.141	10	FGFR2	121478332	121598458	fibroblast growth factor receptor 2 [Source:HGNC Symbol;Acc:HGNC:3689]	no
ENSG00000066557	-0.545	2.1e-07	2.2e-06	1	LRRC40	70144805	70205579	leucine rich repeat containing 40 [Source:HGNC Symbol;Acc:HGNC:26004]	no
ENSG00000066583	-0.047	0.678	0.75	5	ISOC1	129094749	129114028	isochorismatase domain containing 1 [Source:HGNC Symbol;Acc:HGNC:24254]	no
ENSG00000066629	-0.081	0.48	0.575	14	EML1	99737693	99942060	EMAP like 1 [Source:HGNC Symbol;Acc:HGNC:3330]	no
ENSG00000066651	-0.179	0.115	0.181	6	TRMT11	125986479	126203817	tRNA methyltransferase 11 homolog [Source:HGNC Symbol;Acc:HGNC:21080]	no
ENSG00000066654	-0.406	0.0002	0.00081	16	THUMPD1	20702816	20742084	THUMP domain containing 1 [Source:HGNC Symbol;Acc:HGNC:23807]	no
ENSG00000066697	-0.051	0.658	0.734	9	MSANTD3	100427143	100451734	Myb/SANT DNA binding domain containing 3 [Source:HGNC Symbol;Acc:HGNC:23370]	no
ENSG00000066735	0.362	0.001	0.003	14	KIF26A	104136454	104180894	kinesin family member 26A [Source:HGNC Symbol;Acc:HGNC:20226]	no
ENSG00000139908	0.769	1.3e-16	2e-14	14	TSSK4	24205696	24208362	testis specific serine kinase 4 [Source:HGNC Symbol;Acc:HGNC:19825]	no
ENSG00000066777	-0.039	0.73	0.793	8	ARFGEF1	67173511	67343781	ADP ribosylation factor guanine nucleotide exchange factor 1 [Source:HGNC Symbol;Acc:HGNC:15772]	no
ENSG00000066827	-0.001	0.992	0.994	8	ZFAT	134477788	134713049	zinc finger and AT-hook domain containing [Source:HGNC Symbol;Acc:HGNC:19899]	no
ENSG00000066855	-0.257	0.022	0.045	8	MTFR1	65644734	65771261	mitochondrial fission regulator 1 [Source:HGNC Symbol;Acc:HGNC:29510]	no
ENSG00000066923	-0.22	0.052	0.092	7	STAG3	100177563	100221488	stromal antigen 3 [Source:HGNC Symbol;Acc:HGNC:11356]	no
ENSG00000066926	-0.41	0.00017	0.00071	18	FECH	57544377	57586732	ferrochelatase [Source:HGNC Symbol;Acc:HGNC:3647]	no
ENSG00000182636	0.769	1.4e-16	2e-14	15	NDN	23685400	23687305	necdin, MAGE family member [Source:HGNC Symbol;Acc:HGNC:7675]	no
ENSG00000067048	0.979	5.7e-55	3.9e-51	Y	DDX3Y	12904108	12920478	DEAD-box helicase 3 Y-linked [Source:HGNC Symbol;Acc:HGNC:2699]	no
ENSG00000067057	-0.425	9.5e-05	0.00042	10	PFKP	3066333	3137718	phosphofructokinase, platelet [Source:HGNC Symbol;Acc:HGNC:8878]	no
ENSG00000067064	-0.279	0.013	0.028	10	IDI1	1039152	1049119	isopentenyl-diphosphate delta isomerase 1 [Source:HGNC Symbol;Acc:HGNC:5387]	no
ENSG00000067082	-0.03	0.795	0.846	10	KLF6	3775996	3785281	KLF transcription factor 6 [Source:HGNC Symbol;Acc:HGNC:2235]	no
ENSG00000067113	-0.434	6.4e-05	0.0003	5	PLPP1	55424854	55534969	phospholipid phosphatase 1 [Source:HGNC Symbol;Acc:HGNC:9228]	no
ENSG00000067141	-0.512	1.4e-06	1.1e-05	15	NEO1	73051710	73305205	neogenin 1 [Source:HGNC Symbol;Acc:HGNC:7754]	no
ENSG00000067167	-0.572	3.7e-08	4.9e-07	8	TRAM1	70573218	70608416	translocation associated membrane protein 1 [Source:HGNC Symbol;Acc:HGNC:20568]	no
ENSG00000067177	0.432	7e-05	0.00033	X	PHKA1	72578814	72714319	phosphorylase kinase regulatory subunit alpha 1 [Source:HGNC Symbol;Acc:HGNC:8925]	no
ENSG00000067182	-0.007	0.952	0.964	12	TNFRSF1A	6328757	6342114	TNF receptor superfamily member 1A [Source:HGNC Symbol;Acc:HGNC:11916]	no
ENSG00000153303	0.768	1.5e-16	2.2e-14	6	FRMD1	168053095	168101511	FERM domain containing 1 [Source:HGNC Symbol;Acc:HGNC:21240]	no
ENSG00000067208	-0.025	0.825	0.869	1	EVI5	92508696	92792404	ecotropic viral integration site 5 [Source:HGNC Symbol;Acc:HGNC:3501]	no
ENSG00000067221	0.269	0.016	0.035	15	STOML1	73978926	73994622	stomatin like 1 [Source:HGNC Symbol;Acc:HGNC:14560]	no
ENSG00000067225	-0.235	0.037	0.071	15	PKM	72199029	72231819	pyruvate kinase M1/2 [Source:HGNC Symbol;Acc:HGNC:9021]	no
ENSG00000067248	-0.164	0.149	0.224	5	DHX29	55256055	55307694	DExH-box helicase 29 [Source:HGNC Symbol;Acc:HGNC:15815]	no
ENSG00000067334	-0.459	2.1e-05	0.00011	1	DNTTIP2	93866284	93879918	deoxynucleotidyltransferase terminal interacting protein 2 [Source:HGNC Symbol;Acc:HGNC:24013]	no
ENSG00000067365	0.37	0.00079	0.003	16	METTL22	8621683	8649654	methyltransferase 22, Kin17 lysine [Source:HGNC Symbol;Acc:HGNC:28368]	no
ENSG00000067369	-0.283	0.011	0.026	15	TP53BP1	43403061	43510728	tumor protein p53 binding protein 1 [Source:HGNC Symbol;Acc:HGNC:11999]	no
ENSG00000067445	-0.306	0.006	0.015	X	TRO	54920462	54931431	trophinin [Source:HGNC Symbol;Acc:HGNC:12326]	no
ENSG00000067533	-0.368	0.00085	0.003	1	RRP15	218285293	218337983	ribosomal RNA processing 15 homolog [Source:HGNC Symbol;Acc:HGNC:24255]	no
ENSG00000067560	-0.564	6.2e-08	7.7e-07	3	RHOA	49359139	49412998	ras homolog family member A [Source:HGNC Symbol;Acc:HGNC:667]	no
ENSG00000067596	-0.454	2.7e-05	0.00014	17	DHX8	43483865	43610338	DEAH-box helicase 8 [Source:HGNC Symbol;Acc:HGNC:2749]	no
ENSG00000067606	-0.109	0.341	0.441	1	PRKCZ	2050411	2185395	protein kinase C zeta [Source:HGNC Symbol;Acc:HGNC:9412]	no
ENSG00000067646	0.889	8.7e-28	9.2e-25	Y	ZFY	2935281	2982506	zinc finger protein Y-linked [Source:HGNC Symbol;Acc:HGNC:12870]	no
ENSG00000067704	-0.00085	0.994	0.995	1	IARS2	220094132	220148041	isoleucyl-tRNA synthetase 2, mitochondrial [Source:HGNC Symbol;Acc:HGNC:29685]	no
ENSG00000067715	-0.384	0.00047	0.002	12	SYT1	78863993	79452008	synaptotagmin 1 [Source:HGNC Symbol;Acc:HGNC:11509]	no
ENSG00000067798	0.37	0.00078	0.003	12	NAV3	77324641	78213010	neuron navigator 3 [Source:HGNC Symbol;Acc:HGNC:15998]	no
ENSG00000067829	0.044	0.703	0.771	X	IDH3G	153785766	153794512	isocitrate dehydrogenase (NAD(+)) 3 non-catalytic subunit gamma [Source:HGNC Symbol;Acc:HGNC:5386]	no
ENSG00000067836	0.19	0.093	0.151	16	ROGDI	4796968	4802880	rogdi atypical leucine zipper [Source:HGNC Symbol;Acc:HGNC:29478]	no
ENSG00000067840	0.016	0.888	0.916	X	PDZD4	153802166	153830565	PDZ domain containing 4 [Source:HGNC Symbol;Acc:HGNC:21167]	no
ENSG00000067900	-0.242	0.032	0.061	18	ROCK1	20946906	21111813	Rho associated coiled-coil containing protein kinase 1 [Source:HGNC Symbol;Acc:HGNC:10251]	no
ENSG00000067955	-0.626	6.9e-10	1.6e-08	16	CBFB	67028984	67101058	core-binding factor subunit beta [Source:HGNC Symbol;Acc:HGNC:1539]	no
ENSG00000067992	-0.231	0.04	0.075	X	PDK3	24465244	24550466	pyruvate dehydrogenase kinase 3 [Source:HGNC Symbol;Acc:HGNC:8811]	no
ENSG00000068001	-0.124	0.278	0.375	3	HYAL2	50317790	50322782	hyaluronidase 2 [Source:HGNC Symbol;Acc:HGNC:5321]	no
ENSG00000068024	0.245	0.029	0.057	2	HDAC4	239048168	239401654	histone deacetylase 4 [Source:HGNC Symbol;Acc:HGNC:14063]	no
ENSG00000068028	0.153	0.179	0.26	3	RASSF1	50329782	50340980	Ras association domain family member 1 [Source:HGNC Symbol;Acc:HGNC:9882]	no
ENSG00000068078	0.316	0.004	0.012	4	FGFR3	1793293	1808872	fibroblast growth factor receptor 3 [Source:HGNC Symbol;Acc:HGNC:3690]	no
ENSG00000068097	-0.428	8.2e-05	0.00037	17	HEATR6	60041008	60078922	HEAT repeat containing 6 [Source:HGNC Symbol;Acc:HGNC:24076]	no
ENSG00000068120	0.375	0.00067	0.002	17	COASY	42561467	42566277	Coenzyme A synthase [Source:HGNC Symbol;Acc:HGNC:29932]	no
ENSG00000068137	0.142	0.213	0.301	17	PLEKHH3	42667914	42676994	pleckstrin homology, MyTH4 and FERM domain containing H3 [Source:HGNC Symbol;Acc:HGNC:26105]	no
ENSG00000068305	-0.369	0.00083	0.003	15	MEF2A	99565417	99716488	myocyte enhancer factor 2A [Source:HGNC Symbol;Acc:HGNC:6993]	no
ENSG00000068308	-0.26	0.02	0.042	X	OTUD5	48922024	48958386	OTU deubiquitinase 5 [Source:HGNC Symbol;Acc:HGNC:25402]	no
ENSG00000068323	-0.226	0.045	0.083	X	TFE3	49028726	49043410	transcription factor binding to IGHM enhancer 3 [Source:HGNC Symbol;Acc:HGNC:11752]	no
ENSG00000068354	0.052	0.651	0.727	X	TBC1D25	48539714	48562609	TBC1 domain family member 25 [Source:HGNC Symbol;Acc:HGNC:8092]	no
ENSG00000068366	-0.227	0.044	0.081	X	ACSL4	109624244	109733403	acyl-CoA synthetase long chain family member 4 [Source:HGNC Symbol;Acc:HGNC:3571]	no
ENSG00000068383	-0.258	0.022	0.044	10	INPP5A	132537787	132783480	inositol polyphosphate-5-phosphatase A [Source:HGNC Symbol;Acc:HGNC:6076]	no
ENSG00000068394	-0.041	0.722	0.787	X	GPKOW	49113407	49123735	G-patch domain and KOW motifs [Source:HGNC Symbol;Acc:HGNC:30677]	no
ENSG00000068400	0.367	0.00089	0.003	X	GRIPAP1	48973720	49002265	GRIP1 associated protein 1 [Source:HGNC Symbol;Acc:HGNC:18706]	no
ENSG00000068438	0.15	0.186	0.269	X	FTSJ1	48476021	48486364	FtsJ RNA 2'-O-methyltransferase 1 [Source:HGNC Symbol;Acc:HGNC:13254]	no
ENSG00000068489	0.138	0.225	0.316	17	PRR11	59155732	59206709	proline rich 11 [Source:HGNC Symbol;Acc:HGNC:25619]	no
ENSG00000068650	-0.302	0.007	0.017	13	ATP11A	112690038	112887168	ATPase phospholipid transporting 11A [Source:HGNC Symbol;Acc:HGNC:13552]	no
ENSG00000068654	0.095	0.405	0.505	2	POLR1A	86020216	86106155	RNA polymerase I subunit A [Source:HGNC Symbol;Acc:HGNC:17264]	no
ENSG00000068697	-0.421	0.00011	0.00049	2	LAPTM4A	20032650	20051628	lysosomal protein transmembrane 4 alpha [Source:HGNC Symbol;Acc:HGNC:6924]	no
ENSG00000068724	0.341	0.002	0.006	2	TTC7A	46915869	47076137	tetratricopeptide repeat domain 7A [Source:HGNC Symbol;Acc:HGNC:19750]	no
ENSG00000068745	-0.078	0.492	0.587	3	IP6K2	48688003	48740353	inositol hexakisphosphate kinase 2 [Source:HGNC Symbol;Acc:HGNC:17313]	no
ENSG00000068784	-0.543	2.4e-07	2.5e-06	2	SRBD1	45388680	45612165	S1 RNA binding domain 1 [Source:HGNC Symbol;Acc:HGNC:25521]	no
ENSG00000068796	-0.264	0.019	0.039	5	KIF2A	62306162	62391025	kinesin family member 2A [Source:HGNC Symbol;Acc:HGNC:6318]	no
ENSG00000068831	0.025	0.829	0.872	11	RASGRP2	64726911	64745456	RAS guanyl releasing protein 2 [Source:HGNC Symbol;Acc:HGNC:9879]	no
ENSG00000068878	0.217	0.055	0.098	2	PSME4	53864069	53970993	proteasome activator subunit 4 [Source:HGNC Symbol;Acc:HGNC:20635]	no
ENSG00000068885	-0.55	1.5e-07	1.7e-06	3	IFT80	160256986	160399880	intraflagellar transport 80 [Source:HGNC Symbol;Acc:HGNC:29262]	no
ENSG00000068903	-0.246	0.029	0.057	19	SIRT2	38878555	38899862	sirtuin 2 [Source:HGNC Symbol;Acc:HGNC:10886]	no
ENSG00000068912	-0.416	0.00014	0.00057	2	ERLEC1	53787009	53833038	endoplasmic reticulum lectin 1 [Source:HGNC Symbol;Acc:HGNC:25222]	no
ENSG00000068971	0.432	7.1e-05	0.00033	11	PPP2R5B	64917553	64934475	protein phosphatase 2 regulatory subunit B'beta [Source:HGNC Symbol;Acc:HGNC:9310]	no
ENSG00000068976	-0.363	0.001	0.003	11	PYGM	64746389	64759974	glycogen phosphorylase, muscle associated [Source:HGNC Symbol;Acc:HGNC:9726]	no
ENSG00000069020	0.306	0.006	0.015	5	MAST4	66596380	67169593	microtubule associated serine/threonine kinase family member 4 [Source:HGNC Symbol;Acc:HGNC:19037]	no
ENSG00000069188	0.394	0.00033	0.001	17	SDK2	73334384	73644445	sidekick cell adhesion molecule 2 [Source:HGNC Symbol;Acc:HGNC:19308]	no
ENSG00000069248	-0.311	0.005	0.013	1	NUP133	229440259	229508341	nucleoporin 133 [Source:HGNC Symbol;Acc:HGNC:18016]	no
ENSG00000069275	-0.291	0.009	0.022	1	NUCKS1	205712822	205750182	nuclear casein kinase and cyclin dependent kinase substrate 1 [Source:HGNC Symbol;Acc:HGNC:29923]	no
ENSG00000069329	-0.499	2.9e-06	2.1e-05	16	VPS35	46656132	46689518	VPS35 retromer complex component [Source:HGNC Symbol;Acc:HGNC:13487]	no
ENSG00000069345	-0.61	2.3e-09	4.5e-08	16	DNAJA2	46955362	46973674	DnaJ heat shock protein family (Hsp40) member A2 [Source:HGNC Symbol;Acc:HGNC:14884]	no
ENSG00000069399	0.432	6.9e-05	0.00032	19	BCL3	44747705	44760044	BCL3 transcription coactivator [Source:HGNC Symbol;Acc:HGNC:998]	no
ENSG00000127481	0.764	2.7e-16	3.8e-14	1	UBR4	19074510	19210266	ubiquitin protein ligase E3 component n-recognin 4 [Source:HGNC Symbol;Acc:HGNC:30313]	no
ENSG00000069482	-0.399	0.00027	0.001	11	GAL	68683779	68691175	galanin and GMAP prepropeptide [Source:HGNC Symbol;Acc:HGNC:4114]	no
ENSG00000247903	0.763	3.2e-16	4.4e-14	12	ENSG00000247903	26971586	26979582	novel transcript, antisense to TM7SF3	no
ENSG00000069509	-0.446	3.9e-05	0.00019	X	FUNDC1	44523639	44542859	FUN14 domain containing 1 [Source:HGNC Symbol;Acc:HGNC:28746]	no
ENSG00000069535	-0.476	9.3e-06	5.7e-05	X	MAOB	43766610	43882450	monoamine oxidase B [Source:HGNC Symbol;Acc:HGNC:6834]	no
ENSG00000069667	-0.108	0.346	0.446	15	RORA	60488284	61229302	RAR related orphan receptor A [Source:HGNC Symbol;Acc:HGNC:10258]	no
ENSG00000069702	-0.087	0.446	0.543	1	TGFBR3	91680343	91906335	transforming growth factor beta receptor 3 [Source:HGNC Symbol;Acc:HGNC:11774]	no
ENSG00000069812	-0.011	0.92	0.94	1	HES2	6412418	6424670	hes family bHLH transcription factor 2 [Source:HGNC Symbol;Acc:HGNC:16005]	no
ENSG00000069849	-0.109	0.339	0.439	3	ATP1B3	141876124	141926549	ATPase Na+/K+ transporting subunit beta 3 [Source:HGNC Symbol;Acc:HGNC:806]	no
ENSG00000069869	0.158	0.164	0.242	15	NEDD4	55826922	55993660	NEDD4 E3 ubiquitin protein ligase [Source:HGNC Symbol;Acc:HGNC:7727]	no
ENSG00000069943	0.079	0.49	0.585	15	PIGB	55318960	55355648	phosphatidylinositol glycan anchor biosynthesis class B [Source:HGNC Symbol;Acc:HGNC:8959]	no
ENSG00000069956	-0.498	3e-06	2.1e-05	15	MAPK6	51952106	52067375	mitogen-activated protein kinase 6 [Source:HGNC Symbol;Acc:HGNC:6879]	no
ENSG00000069966	-0.242	0.032	0.062	15	GNB5	52115100	52191392	G protein subunit beta 5 [Source:HGNC Symbol;Acc:HGNC:4401]	no
ENSG00000069974	0.192	0.089	0.146	15	RAB27A	55202966	55319113	RAB27A, member RAS oncogene family [Source:HGNC Symbol;Acc:HGNC:9766]	no
ENSG00000069998	-0.07	0.541	0.633	22	HDHD5	17137511	17165287	haloacid dehalogenase like hydrolase domain containing 5 [Source:HGNC Symbol;Acc:HGNC:1843]	no
ENSG00000070010	0.199	0.079	0.133	22	UFD1	19449911	19479202	ubiquitin recognition factor in ER associated degradation 1 [Source:HGNC Symbol;Acc:HGNC:12520]	no
ENSG00000070018	-0.01	0.932	0.949	12	LRP6	12116025	12267044	LDL receptor related protein 6 [Source:HGNC Symbol;Acc:HGNC:6698]	no
ENSG00000070019	-0.314	0.005	0.012	12	GUCY2C	14612632	14696599	guanylate cyclase 2C [Source:HGNC Symbol;Acc:HGNC:4688]	no
ENSG00000070047	0.371	0.00076	0.003	11	PHRF1	576470	612222	PHD and ring finger domains 1 [Source:HGNC Symbol;Acc:HGNC:24351]	no
ENSG00000070061	-0.02	0.859	0.895	9	ELP1	108866898	108934328	elongator acetyltransferase complex subunit 1 [Source:HGNC Symbol;Acc:HGNC:5959]	no
ENSG00000070081	-0.074	0.517	0.61	11	NUCB2	17208153	17349980	nucleobindin 2 [Source:HGNC Symbol;Acc:HGNC:8044]	no
ENSG00000070087	-0.51	1.6e-06	1.2e-05	3	PFN2	149964904	150050788	profilin 2 [Source:HGNC Symbol;Acc:HGNC:8882]	no
ENSG00000070159	0.441	4.7e-05	0.00023	9	PTPN3	109375466	109498313	protein tyrosine phosphatase non-receptor type 3 [Source:HGNC Symbol;Acc:HGNC:9655]	no
ENSG00000070182	0.36	0.001	0.003	14	SPTB	64746283	64879907	spectrin beta, erythrocytic [Source:HGNC Symbol;Acc:HGNC:11274]	no
ENSG00000070214	-0.464	1.7e-05	9.4e-05	9	SLC44A1	105244622	105439171	solute carrier family 44 member 1 [Source:HGNC Symbol;Acc:HGNC:18798]	no
ENSG00000070269	0.426	9e-05	0.0004	14	TMEM260	56488354	56650606	transmembrane protein 260 [Source:HGNC Symbol;Acc:HGNC:20185]	no
ENSG00000070366	-0.227	0.045	0.082	17	SMG6	2059839	2303785	SMG6 nonsense mediated mRNA decay factor [Source:HGNC Symbol;Acc:HGNC:17809]	no
ENSG00000070367	-0.417	0.00013	0.00057	14	EXOC5	57200507	57268905	exocyst complex component 5 [Source:HGNC Symbol;Acc:HGNC:10696]	no
ENSG00000070371	0.24	0.033	0.063	22	CLTCL1	19179473	19291719	clathrin heavy chain like 1 [Source:HGNC Symbol;Acc:HGNC:2093]	no
ENSG00000070404	-0.316	0.005	0.012	19	FSTL3	676392	683392	follistatin like 3 [Source:HGNC Symbol;Acc:HGNC:3973]	no
ENSG00000070413	0.115	0.314	0.412	22	DGCR2	19036282	19122454	DiGeorge syndrome critical region gene 2 [Source:HGNC Symbol;Acc:HGNC:2845]	no
ENSG00000070423	0.47	1.2e-05	7.1e-05	19	RNF126	647526	663233	ring finger protein 126 [Source:HGNC Symbol;Acc:HGNC:21151]	no
ENSG00000070444	0.067	0.557	0.648	17	MNT	2384073	2401104	MAX network transcriptional repressor [Source:HGNC Symbol;Acc:HGNC:7188]	no
ENSG00000285979	0.762	3.6e-16	4.9e-14	16	ENSG00000285979	57177349	57181390	novel transcript, antisense to FAM192A	no
ENSG00000070495	-0.233	0.039	0.073	17	JMJD6	76712832	76726799	jumonji domain containing 6, arginine demethylase and lysine hydroxylase [Source:HGNC Symbol;Acc:HGNC:19355]	no
ENSG00000070501	-0.319	0.004	0.011	8	POLB	42338454	42371808	DNA polymerase beta [Source:HGNC Symbol;Acc:HGNC:9174]	no
ENSG00000070540	0.094	0.409	0.509	17	WIPI1	68420948	68457513	WD repeat domain, phosphoinositide interacting 1 [Source:HGNC Symbol;Acc:HGNC:25471]	no
ENSG00000070610	0.299	0.007	0.018	9	GBA2	35736866	35749228	glucosylceramidase beta 2 [Source:HGNC Symbol;Acc:HGNC:18986]	no
ENSG00000070614	-0.031	0.787	0.839	5	NDST1	150485818	150558211	N-deacetylase and N-sulfotransferase 1 [Source:HGNC Symbol;Acc:HGNC:7680]	no
ENSG00000070669	0.258	0.022	0.044	7	ASNS	97851677	97872542	asparagine synthetase (glutamine-hydrolyzing) [Source:HGNC Symbol;Acc:HGNC:753]	no
ENSG00000070718	0.213	0.06	0.104	8	AP3M2	42152946	42171673	adaptor related protein complex 3 subunit mu 2 [Source:HGNC Symbol;Acc:HGNC:570]	no
ENSG00000070756	-0.294	0.009	0.02	8	PABPC1	100685816	100722809	poly(A) binding protein cytoplasmic 1 [Source:HGNC Symbol;Acc:HGNC:8554]	no
ENSG00000070759	0.233	0.039	0.072	1	TESK2	45343883	45491163	testis associated actin remodelling kinase 2 [Source:HGNC Symbol;Acc:HGNC:11732]	no
ENSG00000070761	0.2	0.078	0.13	16	CFAP20	58113592	58129381	cilia and flagella associated protein 20 [Source:HGNC Symbol;Acc:HGNC:29523]	no
ENSG00000070770	0.013	0.908	0.931	16	CSNK2A2	58157907	58198106	casein kinase 2 alpha 2 [Source:HGNC Symbol;Acc:HGNC:2459]	no
ENSG00000070778	0.147	0.196	0.282	14	PTPN21	88465778	88555007	protein tyrosine phosphatase non-receptor type 21 [Source:HGNC Symbol;Acc:HGNC:9651]	no
ENSG00000070785	-0.575	2.9e-08	4e-07	1	EIF2B3	44850522	44986722	eukaryotic translation initiation factor 2B subunit gamma [Source:HGNC Symbol;Acc:HGNC:3259]	no
ENSG00000135636	0.761	4.1e-16	5.5e-14	2	DYSF	71453561	71686763	dysferlin [Source:HGNC Symbol;Acc:HGNC:3097]	no
ENSG00000070831	-0.358	0.001	0.004	1	CDC42	22052627	22101360	cell division cycle 42 [Source:HGNC Symbol;Acc:HGNC:1736]	no
ENSG00000070882	-0.29	0.009	0.022	7	OSBPL3	24796540	24981634	oxysterol binding protein like 3 [Source:HGNC Symbol;Acc:HGNC:16370]	no
ENSG00000070886	0.408	0.00019	0.00077	1	EPHA8	22563489	22603595	EPH receptor A8 [Source:HGNC Symbol;Acc:HGNC:3391]	no
ENSG00000070950	-0.252	0.025	0.051	3	RAD18	8775402	8963773	RAD18 E3 ubiquitin protein ligase [Source:HGNC Symbol;Acc:HGNC:18278]	no
ENSG00000070961	-0.418	0.00013	0.00054	12	ATP2B1	89588049	89709366	ATPase plasma membrane Ca2+ transporting 1 [Source:HGNC Symbol;Acc:HGNC:814]	no
ENSG00000071051	0.311	0.005	0.013	2	NCK2	105744912	105894274	NCK adaptor protein 2 [Source:HGNC Symbol;Acc:HGNC:7665]	no
ENSG00000071054	-0.181	0.111	0.175	2	MAP4K4	101696850	101894690	mitogen-activated protein kinase kinase kinase kinase 4 [Source:HGNC Symbol;Acc:HGNC:6866]	no
ENSG00000071073	-0.094	0.41	0.509	2	MGAT4A	98619106	98731132	alpha-1,3-mannosyl-glycoprotein 4-beta-N-acetylglucosaminyltransferase A [Source:HGNC Symbol;Acc:HGNC:7047]	no
ENSG00000071082	-0.533	4.3e-07	4e-06	2	RPL31	101002229	101024032	ribosomal protein L31 [Source:HGNC Symbol;Acc:HGNC:10334]	no
ENSG00000071127	-0.342	0.002	0.006	4	WDR1	10068089	10116972	WD repeat domain 1 [Source:HGNC Symbol;Acc:HGNC:12754]	no
ENSG00000071189	-0.324	0.004	0.01	7	SNX13	17790761	17940501	sorting nexin 13 [Source:HGNC Symbol;Acc:HGNC:21335]	no
ENSG00000071205	-0.19	0.094	0.153	4	ARHGAP10	147732063	148072776	Rho GTPase activating protein 10 [Source:HGNC Symbol;Acc:HGNC:26099]	no
ENSG00000071242	0.284	0.011	0.025	6	RPS6KA2	166409364	166906451	ribosomal protein S6 kinase A2 [Source:HGNC Symbol;Acc:HGNC:10431]	no
ENSG00000071243	0.018	0.877	0.909	7	ING3	120950763	120977216	inhibitor of growth family member 3 [Source:HGNC Symbol;Acc:HGNC:14587]	no
ENSG00000071246	0.302	0.007	0.017	14	VASH1	76761468	76783015	vasohibin 1 [Source:HGNC Symbol;Acc:HGNC:19964]	no
ENSG00000071282	0.012	0.916	0.937	3	LMCD1	8501807	8574668	LIM and cysteine rich domains 1 [Source:HGNC Symbol;Acc:HGNC:6633]	no
ENSG00000071462	-0.068	0.551	0.642	7	BUD23	73683597	73698212	BUD23 rRNA methyltransferase and ribosome maturation factor [Source:HGNC Symbol;Acc:HGNC:16405]	no
ENSG00000071537	-0.02	0.863	0.898	14	SEL1L	81471547	81533853	SEL1L adaptor subunit of ERAD E3 ubiquitin ligase [Source:HGNC Symbol;Acc:HGNC:10717]	no
ENSG00000071539	-0.426	9.2e-05	0.00041	5	TRIP13	892884	919357	thyroid hormone receptor interactor 13 [Source:HGNC Symbol;Acc:HGNC:12307]	no
ENSG00000071553	-0.103	0.365	0.465	X	ATP6AP1	154428633	154436516	ATPase H+ transporting accessory protein 1 [Source:HGNC Symbol;Acc:HGNC:868]	no
ENSG00000071564	0.024	0.836	0.877	19	TCF3	1609291	1652615	transcription factor 3 [Source:HGNC Symbol;Acc:HGNC:11633]	no
ENSG00000071575	-0.157	0.168	0.248	2	TRIB2	12716910	12742734	tribbles pseudokinase 2 [Source:HGNC Symbol;Acc:HGNC:30809]	no
ENSG00000071626	0.105	0.356	0.456	19	DAZAP1	1407569	1435687	DAZ associated protein 1 [Source:HGNC Symbol;Acc:HGNC:2683]	no
ENSG00000071655	0.05	0.66	0.736	19	MBD3	1573596	1592865	methyl-CpG binding domain protein 3 [Source:HGNC Symbol;Acc:HGNC:6918]	no
ENSG00000071794	-0.346	0.002	0.005	3	HLTF	149030127	149086554	helicase like transcription factor [Source:HGNC Symbol;Acc:HGNC:11099]	no
ENSG00000071859	-0.302	0.007	0.017	X	FAM50A	154444141	154450654	family with sequence similarity 50 member A [Source:HGNC Symbol;Acc:HGNC:18786]	no
ENSG00000071889	0.366	0.00091	0.003	X	FAM3A	154506159	154516242	FAM3 metabolism regulating signaling molecule A [Source:HGNC Symbol;Acc:HGNC:13749]	no
ENSG00000071894	0.033	0.771	0.827	8	CPSF1	144393229	144409335	cleavage and polyadenylation specific factor 1 [Source:HGNC Symbol;Acc:HGNC:2324]	no
ENSG00000071967	-0.217	0.055	0.098	2	CYBRD1	171522247	171558129	cytochrome b reductase 1 [Source:HGNC Symbol;Acc:HGNC:20797]	no
ENSG00000071994	0.116	0.307	0.405	6	PDCD2	170575295	170584692	programmed cell death 2 [Source:HGNC Symbol;Acc:HGNC:8762]	no
ENSG00000072041	-0.014	0.901	0.926	12	SLC6A15	84859491	84913629	solute carrier family 6 member 15 [Source:HGNC Symbol;Acc:HGNC:13621]	no
ENSG00000072042	0.066	0.566	0.655	14	RDH11	67676800	67695793	retinol dehydrogenase 11 [Source:HGNC Symbol;Acc:HGNC:17964]	no
ENSG00000072062	-0.263	0.019	0.04	19	PRKACA	14091688	14118084	protein kinase cAMP-activated catalytic subunit alpha [Source:HGNC Symbol;Acc:HGNC:9380]	no
ENSG00000072071	0.23	0.041	0.076	19	ADGRL1	14147743	14206187	adhesion G protein-coupled receptor L1 [Source:HGNC Symbol;Acc:HGNC:20973]	no
ENSG00000072110	-0.287	0.01	0.024	14	ACTN1	68874128	68979440	actinin alpha 1 [Source:HGNC Symbol;Acc:HGNC:163]	no
ENSG00000072121	0.136	0.232	0.324	14	ZFYVE26	67727374	67816590	zinc finger FYVE-type containing 26 [Source:HGNC Symbol;Acc:HGNC:20761]	no
ENSG00000072133	0.068	0.551	0.642	X	RPS6KA6	84058346	84206356	ribosomal protein S6 kinase A6 [Source:HGNC Symbol;Acc:HGNC:10435]	no
ENSG00000072134	-0.219	0.053	0.094	17	EPN2	19215615	19336715	epsin 2 [Source:HGNC Symbol;Acc:HGNC:18639]	no
ENSG00000072135	0.307	0.006	0.015	2	PTPN18	130356045	130375405	protein tyrosine phosphatase non-receptor type 18 [Source:HGNC Symbol;Acc:HGNC:9649]	no
ENSG00000072163	0.181	0.11	0.174	2	LIMS2	127638381	127681786	LIM zinc finger domain containing 2 [Source:HGNC Symbol;Acc:HGNC:16084]	no
ENSG00000072195	0.286	0.011	0.024	2	SPEG	219434843	219493629	striated muscle enriched protein kinase [Source:HGNC Symbol;Acc:HGNC:16901]	no
ENSG00000072201	-0.62	1.1e-09	2.3e-08	4	LNX1	53459301	53701405	ligand of numb-protein X 1 [Source:HGNC Symbol;Acc:HGNC:6657]	no
ENSG00000072210	-0.357	0.001	0.004	17	ALDH3A2	19648136	19685760	aldehyde dehydrogenase 3 family member A2 [Source:HGNC Symbol;Acc:HGNC:403]	no
ENSG00000176769	0.758	6.2e-16	8.2e-14	10	TCERG1L	131092391	131311721	transcription elongation regulator 1 like [Source:HGNC Symbol;Acc:HGNC:23533]	no
ENSG00000072310	-0.149	0.191	0.276	17	SREBF1	17810399	17837002	sterol regulatory element binding transcription factor 1 [Source:HGNC Symbol;Acc:HGNC:11289]	no
ENSG00000072364	-0.119	0.295	0.393	5	AFF4	132875395	132963634	ALF transcription elongation factor 4 [Source:HGNC Symbol;Acc:HGNC:17869]	no
ENSG00000072401	-0.466	1.5e-05	8.5e-05	10	UBE2D1	58334979	58370751	ubiquitin conjugating enzyme E2 D1 [Source:HGNC Symbol;Acc:HGNC:12474]	no
ENSG00000072415	-0.382	0.00051	0.002	14	PALS1	67240713	67336061	protein associated with LIN7 1, MAGUK p55 family member [Source:HGNC Symbol;Acc:HGNC:18669]	no
ENSG00000072422	-0.481	7.2e-06	4.6e-05	10	RHOBTB1	60869438	61001440	Rho related BTB domain containing 1 [Source:HGNC Symbol;Acc:HGNC:18738]	no
ENSG00000072501	0.135	0.234	0.326	X	SMC1A	53374149	53422728	structural maintenance of chromosomes 1A [Source:HGNC Symbol;Acc:HGNC:11111]	no
ENSG00000072506	0.256	0.023	0.046	X	HSD17B10	53431258	53434370	hydroxysteroid 17-beta dehydrogenase 10 [Source:HGNC Symbol;Acc:HGNC:4800]	no
ENSG00000072518	0.236	0.036	0.068	11	MARK2	63838928	63911020	microtubule affinity regulating kinase 2 [Source:HGNC Symbol;Acc:HGNC:3332]	no
ENSG00000072571	0.094	0.409	0.509	5	HMMR	163460203	163491941	hyaluronan mediated motility receptor [Source:HGNC Symbol;Acc:HGNC:5012]	no
ENSG00000072609	0.121	0.288	0.385	12	CHFR	132822187	132956304	checkpoint with forkhead and ring finger domains [Source:HGNC Symbol;Acc:HGNC:20455]	no
ENSG00000072657	-0.039	0.73	0.793	12	TRHDE	72087266	72670758	thyrotropin releasing hormone degrading enzyme [Source:HGNC Symbol;Acc:HGNC:30748]	no
ENSG00000072682	-0.266	0.018	0.037	5	P4HA2	132190147	132295315	prolyl 4-hydroxylase subunit alpha 2 [Source:HGNC Symbol;Acc:HGNC:8547]	no
ENSG00000072736	0.213	0.06	0.104	16	NFATC3	68084751	68229259	nuclear factor of activated T cells 3 [Source:HGNC Symbol;Acc:HGNC:7777]	no
ENSG00000072756	0.038	0.741	0.803	3	TRNT1	3126933	3153435	tRNA nucleotidyl transferase 1 [Source:HGNC Symbol;Acc:HGNC:17341]	no
ENSG00000072778	-0.072	0.527	0.62	17	ACADVL	7217125	7225266	acyl-CoA dehydrogenase very long chain [Source:HGNC Symbol;Acc:HGNC:92]	no
ENSG00000117724	0.757	7.4e-16	9.6e-14	1	CENPF	214603185	214664574	centromere protein F [Source:HGNC Symbol;Acc:HGNC:1857]	no
ENSG00000072803	-0.386	0.00044	0.002	5	FBXW11	171861549	172006873	F-box and WD repeat domain containing 11 [Source:HGNC Symbol;Acc:HGNC:13607]	no
ENSG00000072818	0.008	0.946	0.96	17	ACAP1	7336529	7351477	ArfGAP with coiled-coil, ankyrin repeat and PH domains 1 [Source:HGNC Symbol;Acc:HGNC:16467]	no
ENSG00000198496	0.756	7.9e-16	1e-13	17	NBR2	43125551	43153671	neighbor of BRCA1 lncRNA 2 [Source:HGNC Symbol;Acc:HGNC:20691]	no
ENSG00000285813	0.755	8.8e-16	1.1e-13	11	ENSG00000285813	105995185	105999213	novel transcript, antisense to MSANTD4	no
ENSG00000072849	-0.602	4.5e-09	7.9e-08	17	DERL2	5471254	5486811	derlin 2 [Source:HGNC Symbol;Acc:HGNC:17943]	no
ENSG00000072864	-0.497	3.2e-06	2.2e-05	16	NDE1	15643267	15734691	nudE neurodevelopment protein 1 [Source:HGNC Symbol;Acc:HGNC:17619]	no
ENSG00000072952	0.2	0.077	0.13	11	IRAG1	10573091	10693988	inositol 1,4,5-triphosphate receptor associated 1 [Source:HGNC Symbol;Acc:HGNC:7237]	no
ENSG00000072954	-0.508	1.8e-06	1.4e-05	19	TMEM38A	16661139	16690023	transmembrane protein 38A [Source:HGNC Symbol;Acc:HGNC:28462]	no
ENSG00000072958	-0.169	0.136	0.207	19	AP1M1	16197854	16245906	adaptor related protein complex 1 subunit mu 1 [Source:HGNC Symbol;Acc:HGNC:13667]	no
ENSG00000073008	0.178	0.116	0.182	19	PVR	44643798	44666162	PVR cell adhesion molecule [Source:HGNC Symbol;Acc:HGNC:9705]	no
ENSG00000073050	0.135	0.237	0.329	19	XRCC1	43543311	43580473	X-ray repair cross complementing 1 [Source:HGNC Symbol;Acc:HGNC:12828]	no
ENSG00000005810	0.752	1.4e-15	1.7e-13	13	MYCBP2	77042474	77327094	MYC binding protein 2 [Source:HGNC Symbol;Acc:HGNC:23386]	no
ENSG00000073111	0.051	0.658	0.734	3	MCM2	127598410	127622436	minichromosome maintenance complex component 2 [Source:HGNC Symbol;Acc:HGNC:6944]	no
ENSG00000073150	0.074	0.515	0.609	22	PANX2	50170731	50180295	pannexin 2 [Source:HGNC Symbol;Acc:HGNC:8600]	no
ENSG00000073169	0.386	0.00043	0.002	22	SELENOO	50201011	50217616	selenoprotein O [Source:HGNC Symbol;Acc:HGNC:30395]	no
ENSG00000073350	0.344	0.002	0.006	17	LLGL2	75525080	75575209	LLGL scribble cell polarity complex component 2 [Source:HGNC Symbol;Acc:HGNC:6629]	no
ENSG00000183495	0.752	1.3e-15	1.6e-13	12	EP400	131949942	132080460	E1A binding protein p400 [Source:HGNC Symbol;Acc:HGNC:11958]	no
ENSG00000073464	0.551	1.4e-07	1.5e-06	X	CLCN4	10156975	10237660	chloride voltage-gated channel 4 [Source:HGNC Symbol;Acc:HGNC:2022]	no
ENSG00000073536	0.419	0.00012	0.00051	17	NLE1	35128730	35142304	notchless homolog 1 [Source:HGNC Symbol;Acc:HGNC:19889]	no
ENSG00000073578	-0.324	0.004	0.01	5	SDHA	218303	257082	succinate dehydrogenase complex flavoprotein subunit A [Source:HGNC Symbol;Acc:HGNC:10680]	no
ENSG00000073584	-0.041	0.721	0.786	17	SMARCE1	40624962	40648654	SWI/SNF related, matrix associated, actin dependent regulator of chromatin, subfamily e, member 1 [Source:HGNC Symbol;Acc:HGNC:11109]	no
ENSG00000073605	0.164	0.148	0.223	17	GSDMB	39904595	39919854	gasdermin B [Source:HGNC Symbol;Acc:HGNC:23690]	no
ENSG00000073614	0.183	0.106	0.169	12	KDM5A	280057	389320	lysine demethylase 5A [Source:HGNC Symbol;Acc:HGNC:9886]	no
ENSG00000073670	-0.181	0.111	0.175	17	ADAM11	44758988	44781846	ADAM metallopeptidase domain 11 [Source:HGNC Symbol;Acc:HGNC:189]	no
ENSG00000073711	-0.193	0.089	0.145	3	PPP2R3A	135965728	136147894	protein phosphatase 2 regulatory subunit B''alpha [Source:HGNC Symbol;Acc:HGNC:9307]	no
ENSG00000073712	-0.511	1.5e-06	1.2e-05	14	FERMT2	52857268	52952435	FERM domain containing kindlin 2 [Source:HGNC Symbol;Acc:HGNC:15767]	no
ENSG00000073792	-0.257	0.022	0.045	3	IGF2BP2	185643130	185825042	insulin like growth factor 2 mRNA binding protein 2 [Source:HGNC Symbol;Acc:HGNC:28867]	no
ENSG00000073803	-0.232	0.04	0.074	3	MAP3K13	185282941	185489094	mitogen-activated protein kinase kinase kinase 13 [Source:HGNC Symbol;Acc:HGNC:6852]	no
ENSG00000073849	-0.325	0.003	0.009	3	ST6GAL1	186930325	187078553	ST6 beta-galactoside alpha-2,6-sialyltransferase 1 [Source:HGNC Symbol;Acc:HGNC:10860]	no
ENSG00000073910	0.422	0.00011	0.00046	13	FRY	31846713	32299125	FRY microtubule binding protein [Source:HGNC Symbol;Acc:HGNC:20367]	no
ENSG00000073921	-0.167	0.141	0.213	11	PICALM	85957175	86069882	phosphatidylinositol binding clathrin assembly protein [Source:HGNC Symbol;Acc:HGNC:15514]	no
ENSG00000073969	-0.451	3e-05	0.00016	17	NSF	46590669	46757679	N-ethylmaleimide sensitive factor, vesicle fusing ATPase [Source:HGNC Symbol;Acc:HGNC:8016]	no
ENSG00000074047	-0.048	0.677	0.749	2	GLI2	120735623	120992653	GLI family zinc finger 2 [Source:HGNC Symbol;Acc:HGNC:4318]	no
ENSG00000074054	-0.395	0.00032	0.001	2	CLASP1	121337776	121649476	cytoplasmic linker associated protein 1 [Source:HGNC Symbol;Acc:HGNC:17088]	no
ENSG00000074071	0.384	0.00048	0.002	16	MRPS34	1771890	1773150	mitochondrial ribosomal protein S34 [Source:HGNC Symbol;Acc:HGNC:16618]	no
ENSG00000074181	0.144	0.205	0.293	19	NOTCH3	15159038	15200995	notch receptor 3 [Source:HGNC Symbol;Acc:HGNC:7883]	no
ENSG00000074201	-0.158	0.163	0.242	11	CLNS1A	77514936	77637794	chloride nucleotide-sensitive channel 1A [Source:HGNC Symbol;Acc:HGNC:2080]	no
ENSG00000169871	0.751	1.6e-15	2e-13	7	TRIM56	101085481	101097967	tripartite motif containing 56 [Source:HGNC Symbol;Acc:HGNC:19028]	no
ENSG00000074219	-0.157	0.166	0.245	19	TEAD2	49340595	49362457	TEA domain transcription factor 2 [Source:HGNC Symbol;Acc:HGNC:11715]	no
ENSG00000074266	0.103	0.364	0.464	11	EED	86201212	86278813	embryonic ectoderm development [Source:HGNC Symbol;Acc:HGNC:3188]	no
ENSG00000074317	-0.243	0.031	0.06	5	SNCB	176620082	176630556	synuclein beta [Source:HGNC Symbol;Acc:HGNC:11140]	no
ENSG00000074319	-0.106	0.353	0.453	11	TSG101	18468336	18526951	tumor susceptibility 101 [Source:HGNC Symbol;Acc:HGNC:15971]	no
ENSG00000074356	-0.019	0.865	0.899	17	NCBP3	3802158	3846246	nuclear cap binding subunit 3 [Source:HGNC Symbol;Acc:HGNC:24612]	no
ENSG00000074370	0.169	0.137	0.208	17	ATP2A3	3923870	3964464	ATPase sarcoplasmic/endoplasmic reticulum Ca2+ transporting 3 [Source:HGNC Symbol;Acc:HGNC:813]	no
ENSG00000074410	0.189	0.096	0.155	15	CA12	63321378	63381846	carbonic anhydrase 12 [Source:HGNC Symbol;Acc:HGNC:1371]	no
ENSG00000074582	0.182	0.109	0.172	2	BCS1L	218658764	218663443	BCS1 homolog, ubiquinol-cytochrome c reductase complex chaperone [Source:HGNC Symbol;Acc:HGNC:1020]	no
ENSG00000074590	0.005	0.964	0.973	12	NUAK1	106063345	106138954	NUAK family kinase 1 [Source:HGNC Symbol;Acc:HGNC:14311]	no
ENSG00000074603	0.00028	0.998	0.998	15	DPP8	65442463	65517704	dipeptidyl peptidase 8 [Source:HGNC Symbol;Acc:HGNC:16490]	no
ENSG00000074621	-0.498	3e-06	2.1e-05	15	SLC24A1	65611366	65660995	solute carrier family 24 member 1 [Source:HGNC Symbol;Acc:HGNC:10975]	no
ENSG00000074657	-0.621	1e-09	2.2e-08	18	ZNF532	58862600	58986480	zinc finger protein 532 [Source:HGNC Symbol;Acc:HGNC:30940]	no
ENSG00000074695	-0.086	0.452	0.549	18	LMAN1	59327823	59359265	lectin, mannose binding 1 [Source:HGNC Symbol;Acc:HGNC:6631]	no
ENSG00000074696	-0.578	2.4e-08	3.4e-07	15	HACD3	65530418	65578349	3-hydroxyacyl-CoA dehydratase 3 [Source:HGNC Symbol;Acc:HGNC:24175]	no
ENSG00000074755	0.459	2.1e-05	0.00011	17	ZZEF1	4004445	4143030	zinc finger ZZ-type and EF-hand domain containing 1 [Source:HGNC Symbol;Acc:HGNC:29027]	no
ENSG00000074800	-0.433	6.7e-05	0.00031	1	ENO1	8861000	8879190	enolase 1 [Source:HGNC Symbol;Acc:HGNC:3350]	no
ENSG00000074842	0.216	0.056	0.099	19	MYDGF	4641374	4670362	myeloid derived growth factor [Source:HGNC Symbol;Acc:HGNC:16948]	no
ENSG00000074855	0.264	0.019	0.039	19	ANO8	17323223	17334855	anoctamin 8 [Source:HGNC Symbol;Acc:HGNC:29329]	no
ENSG00000074935	-0.096	0.402	0.502	6	TUBE1	112070663	112087529	tubulin epsilon 1 [Source:HGNC Symbol;Acc:HGNC:20775]	no
ENSG00000074964	-0.005	0.967	0.975	1	ARHGEF10L	17539698	17697874	Rho guanine nucleotide exchange factor 10 like [Source:HGNC Symbol;Acc:HGNC:25540]	no
ENSG00000075043	0.126	0.269	0.364	20	KCNQ2	63400208	63472677	potassium voltage-gated channel subfamily Q member 2 [Source:HGNC Symbol;Acc:HGNC:6296]	no
ENSG00000075089	-0.354	0.001	0.004	12	ACTR6	100199122	100241865	actin related protein 6 [Source:HGNC Symbol;Acc:HGNC:24025]	no
ENSG00000075131	0.131	0.251	0.345	15	TIPIN	66336191	66386746	TIMELESS interacting protein [Source:HGNC Symbol;Acc:HGNC:30750]	no
ENSG00000075142	-0.038	0.742	0.804	7	SRI	88205115	88226993	sorcin [Source:HGNC Symbol;Acc:HGNC:11292]	no
ENSG00000075151	-0.423	0.0001	0.00046	1	EIF4G3	20806292	21177285	eukaryotic translation initiation factor 4 gamma 3 [Source:HGNC Symbol;Acc:HGNC:3298]	no
ENSG00000075188	-0.272	0.015	0.033	12	NUP37	102073103	102120120	nucleoporin 37 [Source:HGNC Symbol;Acc:HGNC:29929]	no
ENSG00000075213	0.092	0.421	0.52	7	SEMA3A	83955777	84492724	semaphorin 3A [Source:HGNC Symbol;Acc:HGNC:10723]	no
ENSG00000075218	0.285	0.011	0.025	22	GTSE1	46296870	46330810	G2 and S-phase expressed 1 [Source:HGNC Symbol;Acc:HGNC:13698]	no
ENSG00000075223	-0.147	0.197	0.284	7	SEMA3C	80742538	80922359	semaphorin 3C [Source:HGNC Symbol;Acc:HGNC:10725]	no
ENSG00000075234	-0.058	0.61	0.694	22	TTC38	46267961	46294008	tetratricopeptide repeat domain 38 [Source:HGNC Symbol;Acc:HGNC:26082]	no
ENSG00000154122	0.749	2.1e-15	2.5e-13	5	ANKH	14704800	14871778	ANKH inorganic pyrophosphate transport regulator [Source:HGNC Symbol;Acc:HGNC:15492]	no
ENSG00000075240	0.1	0.379	0.48	22	GRAMD4	46576012	46679790	GRAM domain containing 4 [Source:HGNC Symbol;Acc:HGNC:29113]	no
ENSG00000165548	0.748	2.3e-15	2.7e-13	14	TMEM63C	77116568	77259495	transmembrane protein 63C [Source:HGNC Symbol;Acc:HGNC:23787]	no
ENSG00000075292	-0.46	2e-05	0.00011	2	ZNF638	71276561	71435069	zinc finger protein 638 [Source:HGNC Symbol;Acc:HGNC:17894]	no
ENSG00000075303	-0.426	8.9e-05	0.0004	7	SLC25A40	87833568	87876360	solute carrier family 25 member 40 [Source:HGNC Symbol;Acc:HGNC:29680]	no
ENSG00000075336	-0.086	0.452	0.549	18	TIMM21	74148523	74160531	translocase of inner mitochondrial membrane 21 [Source:HGNC Symbol;Acc:HGNC:25010]	no
ENSG00000075340	-0.116	0.308	0.406	2	ADD2	70607618	70768225	adducin 2 [Source:HGNC Symbol;Acc:HGNC:244]	no
ENSG00000075388	-0.066	0.565	0.655	11	FGF4	69771022	69775341	fibroblast growth factor 4 [Source:HGNC Symbol;Acc:HGNC:3682]	no
ENSG00000075391	0.097	0.394	0.495	1	RASAL2	178094104	178484147	RAS protein activator like 2 [Source:HGNC Symbol;Acc:HGNC:9874]	no
ENSG00000075399	-0.209	0.065	0.112	16	VPS9D1	89707134	89720898	VPS9 domain containing 1 [Source:HGNC Symbol;Acc:HGNC:13526]	no
ENSG00000075407	0.373	0.00071	0.002	10	ZNF37A	38094334	38150293	zinc finger protein 37A [Source:HGNC Symbol;Acc:HGNC:13102]	no
ENSG00000075413	-0.579	2.2e-08	3.2e-07	14	MARK3	103385377	103503831	microtubule affinity regulating kinase 3 [Source:HGNC Symbol;Acc:HGNC:6897]	no
ENSG00000075415	0.259	0.021	0.043	12	SLC25A3	98593591	98606379	solute carrier family 25 member 3 [Source:HGNC Symbol;Acc:HGNC:10989]	no
ENSG00000075420	-0.364	0.00099	0.003	3	FNDC3B	172039578	172401669	fibronectin type III domain containing 3B [Source:HGNC Symbol;Acc:HGNC:24670]	no
ENSG00000075426	-0.125	0.274	0.37	2	FOSL2	28392448	28417317	FOS like 2, AP-1 transcription factor subunit [Source:HGNC Symbol;Acc:HGNC:3798]	no
ENSG00000096433	0.746	2.9e-15	3.3e-13	6	ITPR3	33620365	33696574	inositol 1,4,5-trisphosphate receptor type 3 [Source:HGNC Symbol;Acc:HGNC:6182]	no
ENSG00000075461	0.207	0.067	0.115	17	CACNG4	66964707	67033398	calcium voltage-gated channel auxiliary subunit gamma 4 [Source:HGNC Symbol;Acc:HGNC:1408]	no
ENSG00000075539	0.476	9.3e-06	5.7e-05	4	FRYL	48497357	48780322	FRY like transcription coactivator [Source:HGNC Symbol;Acc:HGNC:29127]	no
ENSG00000075568	-0.289	0.01	0.023	2	TMEM131	97756333	97995948	transmembrane protein 131 [Source:HGNC Symbol;Acc:HGNC:30366]	no
ENSG00000075618	0.226	0.046	0.083	7	FSCN1	5592816	5606655	fascin actin-bundling protein 1 [Source:HGNC Symbol;Acc:HGNC:11148]	no
ENSG00000075624	-0.172	0.131	0.201	7	ACTB	5526409	5563902	actin beta [Source:HGNC Symbol;Acc:HGNC:132]	no
ENSG00000075643	0.118	0.301	0.399	18	MOCOS	36187497	36272157	molybdenum cofactor sulfurase [Source:HGNC Symbol;Acc:HGNC:18234]	no
ENSG00000075651	0.4	0.00026	0.001	3	PLD1	171600404	171810950	phospholipase D1 [Source:HGNC Symbol;Acc:HGNC:9067]	no
ENSG00000075673	-0.207	0.067	0.116	13	ATP12A	24680408	24712472	ATPase H+/K+ transporting non-gastric alpha2 subunit [Source:HGNC Symbol;Acc:HGNC:13816]	no
ENSG00000075702	0.171	0.132	0.203	19	WDR62	36054649	36105108	WD repeat domain 62 [Source:HGNC Symbol;Acc:HGNC:24502]	no
ENSG00000075711	-0.609	2.6e-09	5e-08	3	DLG1	197042560	197299330	discs large MAGUK scaffold protein 1 [Source:HGNC Symbol;Acc:HGNC:2900]	no
ENSG00000075785	-0.128	0.259	0.354	3	RAB7A	128693669	128825942	RAB7A, member RAS oncogene family [Source:HGNC Symbol;Acc:HGNC:9788]	no
ENSG00000075826	0.368	0.00085	0.003	10	SEC31B	100486646	100519864	SEC31 homolog B, COPII coat complex component [Source:HGNC Symbol;Acc:HGNC:23197]	no
ENSG00000075856	-0.241	0.032	0.062	12	SART3	108522214	108561400	spliceosome associated factor 3, U4/U6 recycling protein [Source:HGNC Symbol;Acc:HGNC:16860]	no
ENSG00000075914	-0.124	0.275	0.371	3	EXOSC7	44975241	45036066	exosome component 7 [Source:HGNC Symbol;Acc:HGNC:28112]	no
ENSG00000075945	-0.541	2.7e-07	2.7e-06	1	KIFAP3	169921326	170085208	kinesin associated protein 3 [Source:HGNC Symbol;Acc:HGNC:17060]	no
ENSG00000075975	-0.201	0.075	0.127	3	MKRN2	12557057	12586208	makorin ring finger protein 2 [Source:HGNC Symbol;Acc:HGNC:7113]	no
ENSG00000076003	-0.034	0.764	0.821	2	MCM6	135839626	135876443	minichromosome maintenance complex component 6 [Source:HGNC Symbol;Acc:HGNC:6949]	no
ENSG00000076043	-0.173	0.128	0.197	11	REXO2	114439435	114450279	RNA exonuclease 2 [Source:HGNC Symbol;Acc:HGNC:17851]	no
ENSG00000076053	-0.608	2.7e-09	5.1e-08	11	RBM7	114400030	114414203	RNA binding motif protein 7 [Source:HGNC Symbol;Acc:HGNC:9904]	no
ENSG00000076067	0.194	0.087	0.144	12	RBMS2	56521820	56596193	RNA binding motif single stranded interacting protein 2 [Source:HGNC Symbol;Acc:HGNC:9909]	no
ENSG00000076108	0.456	2.4e-05	0.00013	12	BAZ2A	56595596	56636816	bromodomain adjacent to zinc finger domain 2A [Source:HGNC Symbol;Acc:HGNC:962]	no
ENSG00000076201	0.388	0.00042	0.002	3	PTPN23	47381011	47413435	protein tyrosine phosphatase non-receptor type 23 [Source:HGNC Symbol;Acc:HGNC:14406]	no
ENSG00000076242	0.082	0.47	0.566	3	MLH1	36993350	37050846	mutL homolog 1 [Source:HGNC Symbol;Acc:HGNC:7127]	no
ENSG00000076248	-0.339	0.002	0.006	12	UNG	109097597	109126725	uracil DNA glycosylase [Source:HGNC Symbol;Acc:HGNC:12572]	no
ENSG00000076321	-0.518	1e-06	8.2e-06	1	KLHL20	173714941	173786692	kelch like family member 20 [Source:HGNC Symbol;Acc:HGNC:25056]	no
ENSG00000076351	-0.166	0.145	0.219	17	SLC46A1	28394642	28407197	solute carrier family 46 member 1 [Source:HGNC Symbol;Acc:HGNC:30521]	no
ENSG00000102699	0.746	3e-15	3.4e-13	13	PARP4	24420931	24512778	poly(ADP-ribose) polymerase family member 4 [Source:HGNC Symbol;Acc:HGNC:271]	no
ENSG00000076382	-0.087	0.448	0.545	17	SPAG5	28577565	28599025	sperm associated antigen 5 [Source:HGNC Symbol;Acc:HGNC:13452]	no
ENSG00000076513	0.15	0.186	0.269	12	ANKRD13A	109999186	110039763	ankyrin repeat domain 13A [Source:HGNC Symbol;Acc:HGNC:21268]	no
ENSG00000076554	-0.459	2.1e-05	0.00011	8	TPD52	80034745	80231232	tumor protein D52 [Source:HGNC Symbol;Acc:HGNC:12005]	no
ENSG00000197102	0.74	6.4e-15	7e-13	14	DYNC1H1	101964573	102056443	dynein cytoplasmic 1 heavy chain 1 [Source:HGNC Symbol;Acc:HGNC:2961]	no
ENSG00000076604	0.082	0.474	0.57	17	TRAF4	28744011	28750956	TNF receptor associated factor 4 [Source:HGNC Symbol;Acc:HGNC:12034]	no
ENSG00000076650	-0.504	2.1e-06	1.6e-05	19	GPATCH1	33080899	33130542	G-patch domain containing 1 [Source:HGNC Symbol;Acc:HGNC:24658]	no
ENSG00000261655	0.74	7e-15	7.6e-13	8	ENSG00000261655	141353403	141355365	novel transcript, overlapping to GPR20	no
ENSG00000076685	0.012	0.915	0.936	10	NT5C2	103087185	103277605	5'-nucleotidase, cytosolic II [Source:HGNC Symbol;Acc:HGNC:8022]	no
ENSG00000076706	0.303	0.007	0.016	11	MCAM	119308529	119321521	melanoma cell adhesion molecule [Source:HGNC Symbol;Acc:HGNC:6934]	no
ENSG00000076716	-0.263	0.019	0.04	X	GPC4	133300103	133415489	glypican 4 [Source:HGNC Symbol;Acc:HGNC:4452]	no
ENSG00000076770	-0.262	0.019	0.04	X	MBNL3	132369320	132489968	muscleblind like splicing regulator 3 [Source:HGNC Symbol;Acc:HGNC:20564]	no
ENSG00000076826	0.119	0.296	0.394	19	CAMSAP3	7595863	7618304	calmodulin regulated spectrin associated protein family member 3 [Source:HGNC Symbol;Acc:HGNC:29307]	no
ENSG00000076864	0.464	1.7e-05	9.4e-05	1	RAP1GAP	21596221	21669357	RAP1 GTPase activating protein [Source:HGNC Symbol;Acc:HGNC:9858]	no
ENSG00000076924	0.009	0.934	0.951	19	XAB2	7619525	7629545	XPA binding protein 2 [Source:HGNC Symbol;Acc:HGNC:14089]	no
ENSG00000076928	0.345	0.002	0.005	19	ARHGEF1	41883173	41930150	Rho guanine nucleotide exchange factor 1 [Source:HGNC Symbol;Acc:HGNC:681]	no
ENSG00000076944	0.082	0.473	0.569	19	STXBP2	7636772	7647873	syntaxin binding protein 2 [Source:HGNC Symbol;Acc:HGNC:11445]	no
ENSG00000076984	0.002	0.989	0.992	19	MAP2K7	7903843	7914478	mitogen-activated protein kinase kinase 7 [Source:HGNC Symbol;Acc:HGNC:6847]	no
ENSG00000077009	0.004	0.973	0.979	19	NMRK2	3933069	3942416	nicotinamide riboside kinase 2 [Source:HGNC Symbol;Acc:HGNC:17871]	no
ENSG00000198720	0.739	7.7e-15	8.2e-13	17	ANKRD13B	29589769	29614761	ankyrin repeat domain 13B [Source:HGNC Symbol;Acc:HGNC:26363]	no
ENSG00000077063	-0.008	0.942	0.957	7	CTTNBP2	117710651	117874139	cortactin binding protein 2 [Source:HGNC Symbol;Acc:HGNC:15679]	no
ENSG00000077097	0.077	0.501	0.596	3	TOP2B	25597978	25664909	DNA topoisomerase II beta [Source:HGNC Symbol;Acc:HGNC:11990]	no
ENSG00000077147	-0.412	0.00016	0.00066	10	TM9SF3	96518110	96587452	transmembrane 9 superfamily member 3 [Source:HGNC Symbol;Acc:HGNC:21529]	no
ENSG00000077150	-0.069	0.548	0.64	10	NFKB2	102394110	102402524	nuclear factor kappa B subunit 2 [Source:HGNC Symbol;Acc:HGNC:7795]	no
ENSG00000077152	-0.482	6.8e-06	4.3e-05	1	UBE2T	202331544	202341984	ubiquitin conjugating enzyme E2 T [Source:HGNC Symbol;Acc:HGNC:25009]	no
ENSG00000077157	0.137	0.229	0.32	1	PPP1R12B	202348699	202592706	protein phosphatase 1 regulatory subunit 12B [Source:HGNC Symbol;Acc:HGNC:7619]	no
ENSG00000077232	-0.371	0.00077	0.003	2	DNAJC10	182716255	182794464	DnaJ heat shock protein family (Hsp40) member C10 [Source:HGNC Symbol;Acc:HGNC:24637]	no
ENSG00000077235	0.289	0.01	0.023	16	GTF3C1	27459555	27549913	general transcription factor IIIC subunit 1 [Source:HGNC Symbol;Acc:HGNC:4664]	no
ENSG00000077238	0.106	0.352	0.452	16	IL4R	27313668	27364778	interleukin 4 receptor [Source:HGNC Symbol;Acc:HGNC:6015]	no
ENSG00000077254	-0.515	1.2e-06	9.5e-06	1	USP33	77695987	77759852	ubiquitin specific peptidase 33 [Source:HGNC Symbol;Acc:HGNC:20059]	no
ENSG00000077264	0.121	0.289	0.386	X	PAK3	110944285	111227361	p21 (RAC1) activated kinase 3 [Source:HGNC Symbol;Acc:HGNC:8592]	no
ENSG00000077274	-0.45	3.2e-05	0.00016	X	CAPN6	111245099	111270483	calpain 6 [Source:HGNC Symbol;Acc:HGNC:1483]	no
ENSG00000077279	0.516	1.1e-06	9.1e-06	X	DCX	111293779	111412429	doublecortin [Source:HGNC Symbol;Acc:HGNC:2714]	no
ENSG00000077312	0.16	0.16	0.237	19	SNRPA	40750637	40765389	small nuclear ribonucleoprotein polypeptide A [Source:HGNC Symbol;Acc:HGNC:11151]	no
ENSG00000077348	0.369	0.00081	0.003	19	EXOSC5	41386371	41397362	exosome component 5 [Source:HGNC Symbol;Acc:HGNC:24662]	no
ENSG00000077380	-0.119	0.297	0.394	2	DYNC1I2	171687409	171750158	dynein cytoplasmic 1 intermediate chain 2 [Source:HGNC Symbol;Acc:HGNC:2964]	no
ENSG00000077454	0.261	0.02	0.042	7	LRCH4	100574011	100586129	leucine rich repeats and calponin homology domain containing 4 [Source:HGNC Symbol;Acc:HGNC:6691]	no
ENSG00000077458	-0.184	0.105	0.168	11	FAM76B	95768953	95790409	family with sequence similarity 76 member B [Source:HGNC Symbol;Acc:HGNC:28492]	no
ENSG00000077463	0.22	0.051	0.091	19	SIRT6	4174109	4182566	sirtuin 6 [Source:HGNC Symbol;Acc:HGNC:14934]	no
ENSG00000077514	-0.39	0.00038	0.001	11	POLD3	74493851	74669117	DNA polymerase delta 3, accessory subunit [Source:HGNC Symbol;Acc:HGNC:20932]	no
ENSG00000072840	0.737	9.1e-15	9.6e-13	4	EVC	5711201	5814305	EvC ciliary complex subunit 1 [Source:HGNC Symbol;Acc:HGNC:3497]	no
ENSG00000077549	-0.269	0.016	0.035	1	CAPZB	19338775	19485539	capping actin protein of muscle Z-line subunit beta [Source:HGNC Symbol;Acc:HGNC:1491]	no
ENSG00000077585	-0.236	0.036	0.069	1	GPR137B	236142505	236221865	G protein-coupled receptor 137B [Source:HGNC Symbol;Acc:HGNC:11862]	no
ENSG00000077616	0.235	0.037	0.07	11	NAALAD2	90131515	90192894	N-acetylated alpha-linked acidic dipeptidase 2 [Source:HGNC Symbol;Acc:HGNC:14526]	no
ENSG00000077684	-0.334	0.003	0.007	4	JADE1	128809700	128875224	jade family PHD finger 1 [Source:HGNC Symbol;Acc:HGNC:30027]	no
ENSG00000077713	-0.118	0.298	0.396	X	SLC25A43	119399336	119454478	solute carrier family 25 member 43 [Source:HGNC Symbol;Acc:HGNC:30557]	no
ENSG00000077721	-0.401	0.00025	0.00097	X	UBE2A	119474802	119591083	ubiquitin conjugating enzyme E2 A [Source:HGNC Symbol;Acc:HGNC:12472]	no
ENSG00000077782	-0.353	0.001	0.004	8	FGFR1	38400215	38468834	fibroblast growth factor receptor 1 [Source:HGNC Symbol;Acc:HGNC:3688]	no
ENSG00000077942	-0.096	0.402	0.502	22	FBLN1	45502238	45601135	fibulin 1 [Source:HGNC Symbol;Acc:HGNC:3600]	no
ENSG00000078018	-0.13	0.254	0.348	2	MAP2	209424047	209734147	microtubule associated protein 2 [Source:HGNC Symbol;Acc:HGNC:6839]	no
ENSG00000078043	-0.215	0.057	0.1	18	PIAS2	46803218	46920160	protein inhibitor of activated STAT 2 [Source:HGNC Symbol;Acc:HGNC:17311]	no
ENSG00000078053	0.209	0.065	0.112	7	AMPH	38383704	38631420	amphiphysin [Source:HGNC Symbol;Acc:HGNC:471]	no
ENSG00000078061	0.265	0.018	0.038	X	ARAF	47561205	47571908	A-Raf proto-oncogene, serine/threonine kinase [Source:HGNC Symbol;Acc:HGNC:646]	no
ENSG00000078070	0.349	0.002	0.005	3	MCCC1	183015218	183116075	methylcrotonyl-CoA carboxylase subunit 1 [Source:HGNC Symbol;Acc:HGNC:6936]	no
ENSG00000078114	-0.135	0.234	0.326	10	NEBL	20779973	21293011	nebulette [Source:HGNC Symbol;Acc:HGNC:16932]	no
ENSG00000078124	-0.071	0.536	0.628	11	ACER3	76860859	77026797	alkaline ceramidase 3 [Source:HGNC Symbol;Acc:HGNC:16066]	no
ENSG00000078140	-0.425	9.3e-05	0.00041	4	UBE2K	39698109	39782792	ubiquitin conjugating enzyme E2 K [Source:HGNC Symbol;Acc:HGNC:4914]	no
ENSG00000078142	-0.354	0.001	0.004	18	PIK3C3	41955234	42087830	phosphatidylinositol 3-kinase catalytic subunit type 3 [Source:HGNC Symbol;Acc:HGNC:8974]	no
ENSG00000078177	-0.072	0.529	0.622	4	N4BP2	40056797	40158252	NEDD4 binding protein 2 [Source:HGNC Symbol;Acc:HGNC:29851]	no
ENSG00000078237	0.003	0.98	0.984	12	TIGAR	4307763	4360028	TP53 induced glycolysis regulatory phosphatase [Source:HGNC Symbol;Acc:HGNC:1185]	no
ENSG00000078246	-0.283	0.012	0.026	12	TULP3	2877223	2941138	TUB like protein 3 [Source:HGNC Symbol;Acc:HGNC:12425]	no
ENSG00000078269	-0.024	0.837	0.877	6	SYNJ2	157981863	158099176	synaptojanin 2 [Source:HGNC Symbol;Acc:HGNC:11504]	no
ENSG00000078295	-0.468	1.3e-05	7.7e-05	5	ADCY2	7396138	7830081	adenylate cyclase 2 [Source:HGNC Symbol;Acc:HGNC:233]	no
ENSG00000078304	-0.437	5.8e-05	0.00027	14	PPP2R5C	101761709	101927989	protein phosphatase 2 regulatory subunit B'gamma [Source:HGNC Symbol;Acc:HGNC:9311]	no
ENSG00000078319	-0.55	1.5e-07	1.7e-06	7	PMS2P1	100328836	100335860	PMS1 homolog 2, mismatch repair system component pseudogene 1 [Source:HGNC Symbol;Acc:HGNC:9123]	no
ENSG00000078369	-0.246	0.029	0.056	1	GNB1	1785285	1892292	G protein subunit beta 1 [Source:HGNC Symbol;Acc:HGNC:4396]	no
ENSG00000078401	0.075	0.509	0.603	6	EDN1	12290361	12297194	endothelin 1 [Source:HGNC Symbol;Acc:HGNC:3176]	no
ENSG00000078403	-0.248	0.028	0.055	10	MLLT10	21524646	21743630	MLLT10 histone lysine methyltransferase DOT1L cofactor [Source:HGNC Symbol;Acc:HGNC:16063]	no
ENSG00000078549	-0.118	0.301	0.398	7	ADCYAP1R1	31052308	31111474	ADCYAP receptor type I [Source:HGNC Symbol;Acc:HGNC:242]	no
ENSG00000078596	-0.268	0.017	0.036	X	ITM2A	79360384	79367667	integral membrane protein 2A [Source:HGNC Symbol;Acc:HGNC:6173]	no
ENSG00000078618	-0.035	0.761	0.819	1	NRDC	51789191	51878805	nardilysin convertase [Source:HGNC Symbol;Acc:HGNC:7995]	no
ENSG00000078668	0.075	0.513	0.607	8	VDAC3	42391624	42405937	voltage dependent anion channel 3 [Source:HGNC Symbol;Acc:HGNC:12674]	no
ENSG00000078674	-0.602	4.3e-09	7.6e-08	8	PCM1	17922842	18029948	pericentriolar material 1 [Source:HGNC Symbol;Acc:HGNC:8727]	no
ENSG00000078687	0.257	0.022	0.045	17	TNRC6C	77958703	78108822	trinucleotide repeat containing adaptor 6C [Source:HGNC Symbol;Acc:HGNC:29318]	no
ENSG00000078699	0.028	0.803	0.852	20	CBFA2T2	33490075	33650036	CBFA2/RUNX1 partner transcriptional co-repressor 2 [Source:HGNC Symbol;Acc:HGNC:1536]	no
ENSG00000078725	-0.195	0.085	0.14	9	BRINP1	119153458	119369435	BMP/retinoic acid inducible neural specific 1 [Source:HGNC Symbol;Acc:HGNC:2687]	no
ENSG00000078747	-0.432	7e-05	0.00033	20	ITCH	34363235	34511773	itchy E3 ubiquitin protein ligase [Source:HGNC Symbol;Acc:HGNC:13890]	no
ENSG00000166750	0.737	1e-14	1e-12	17	SLFN5	35243071	35273655	schlafen family member 5 [Source:HGNC Symbol;Acc:HGNC:28286]	no
ENSG00000078808	0.132	0.245	0.338	1	SDF4	1216931	1232031	stromal cell derived factor 4 [Source:HGNC Symbol;Acc:HGNC:24188]	no
ENSG00000078900	0.105	0.357	0.457	1	TP73	3652516	3736201	tumor protein p73 [Source:HGNC Symbol;Acc:HGNC:12003]	no
ENSG00000078902	-0.264	0.019	0.039	11	TOLLIP	1274371	1309654	toll interacting protein [Source:HGNC Symbol;Acc:HGNC:16476]	no
ENSG00000078967	-0.498	2.9e-06	2.1e-05	7	UBE2D4	43926436	43956136	ubiquitin conjugating enzyme E2 D4 (putative) [Source:HGNC Symbol;Acc:HGNC:21647]	no
ENSG00000079102	-0.191	0.091	0.149	8	RUNX1T1	91954972	92103286	RUNX1 partner transcriptional co-repressor 1 [Source:HGNC Symbol;Acc:HGNC:1535]	no
ENSG00000079134	-0.059	0.607	0.691	18	THOC1	214520	268050	THO complex subunit 1 [Source:HGNC Symbol;Acc:HGNC:19070]	no
ENSG00000079150	0.028	0.807	0.854	2	FKBP7	178463664	178478600	FKBP prolyl isomerase 7 [Source:HGNC Symbol;Acc:HGNC:3723]	no
ENSG00000079156	0.049	0.671	0.744	2	OSBPL6	178194481	178402893	oxysterol binding protein like 6 [Source:HGNC Symbol;Acc:HGNC:16388]	no
ENSG00000079215	0.01	0.93	0.948	5	SLC1A3	36596588	36688334	solute carrier family 1 member 3 [Source:HGNC Symbol;Acc:HGNC:10941]	no
ENSG00000079246	-0.345	0.002	0.005	2	XRCC5	216107464	216206303	X-ray repair cross complementing 5 [Source:HGNC Symbol;Acc:HGNC:12833]	no
ENSG00000079257	-0.399	0.00027	0.001	3	LXN	158645822	158672648	latexin [Source:HGNC Symbol;Acc:HGNC:13347]	no
ENSG00000270325	0.737	9.6e-15	9.9e-13	19	BNIP3P9	19856975	19857527	BCL2 interacting protein 3 pseudogene 9 [Source:HGNC Symbol;Acc:HGNC:49689]	no
ENSG00000198732	0.736	1.1e-14	1.1e-12	14	SMOC1	69854131	70032366	SPARC related modular calcium binding 1 [Source:HGNC Symbol;Acc:HGNC:20318]	no
ENSG00000079313	0.401	0.00025	0.00096	19	REXO1	1815248	1848483	RNA exonuclease 1 homolog [Source:HGNC Symbol;Acc:HGNC:24616]	no
ENSG00000079332	-0.367	0.00087	0.003	10	SAR1A	70147289	70170523	secretion associated Ras related GTPase 1A [Source:HGNC Symbol;Acc:HGNC:10534]	no
ENSG00000079335	-0.404	0.00023	0.00089	1	CDC14A	100345001	100520277	cell division cycle 14A [Source:HGNC Symbol;Acc:HGNC:1718]	no
ENSG00000232442	0.735	1.2e-14	1.2e-12	20	MHENCR	63627179	63628824	melanoma highly expressed competing endogenous lncRNA for miR-425 and miR-489 [Source:HGNC Symbol;Acc:HGNC:53110]	no
ENSG00000079385	0.117	0.305	0.403	19	CEACAM1	42507304	42561234	CEA cell adhesion molecule 1 [Source:HGNC Symbol;Acc:HGNC:1814]	no
ENSG00000079387	-0.616	1.6e-09	3.2e-08	12	SENP1	48042897	48106079	SUMO specific peptidase 1 [Source:HGNC Symbol;Acc:HGNC:17927]	no
ENSG00000079432	0.147	0.195	0.281	19	CIC	42268537	42295797	capicua transcriptional repressor [Source:HGNC Symbol;Acc:HGNC:14214]	no
ENSG00000079435	0.058	0.613	0.695	19	LIPE	42401514	42427388	lipase E, hormone sensitive type [Source:HGNC Symbol;Acc:HGNC:6621]	no
ENSG00000079459	-0.017	0.882	0.912	8	FDFT1	11795573	11839304	farnesyl-diphosphate farnesyltransferase 1 [Source:HGNC Symbol;Acc:HGNC:3629]	no
ENSG00000079462	0.26	0.021	0.042	19	PAFAH1B3	42297033	42303546	platelet activating factor acetylhydrolase 1b catalytic subunit 3 [Source:HGNC Symbol;Acc:HGNC:8576]	no
ENSG00000079482	0.094	0.409	0.508	X	OPHN1	67949349	68433913	oligophrenin 1 [Source:HGNC Symbol;Acc:HGNC:8148]	no
ENSG00000079616	-0.283	0.012	0.026	16	KIF22	29790727	29805385	kinesin family member 22 [Source:HGNC Symbol;Acc:HGNC:6391]	no
ENSG00000079691	-0.306	0.006	0.015	6	CARMIL1	25279078	25620530	capping protein regulator and myosin 1 linker 1 [Source:HGNC Symbol;Acc:HGNC:21581]	no
ENSG00000079739	-0.388	0.00041	0.001	1	PGM1	63593411	63660245	phosphoglucomutase 1 [Source:HGNC Symbol;Acc:HGNC:8905]	no
ENSG00000079785	-0.231	0.041	0.076	2	DDX1	15591178	15634346	DEAD-box helicase 1 [Source:HGNC Symbol;Acc:HGNC:2734]	no
ENSG00000079805	0.14	0.219	0.308	19	DNM2	10718055	10833488	dynamin 2 [Source:HGNC Symbol;Acc:HGNC:2974]	no
ENSG00000079819	-0.519	9.4e-07	7.8e-06	6	EPB41L2	130839347	131063322	erythrocyte membrane protein band 4.1 like 2 [Source:HGNC Symbol;Acc:HGNC:3379]	no
ENSG00000079931	-0.623	9e-10	2e-08	6	MOXD1	132296055	132401475	monooxygenase DBH like 1 [Source:HGNC Symbol;Acc:HGNC:21063]	no
ENSG00000079950	-0.266	0.018	0.038	6	STX7	132445867	132513198	syntaxin 7 [Source:HGNC Symbol;Acc:HGNC:11442]	no
ENSG00000166436	0.733	1.6e-14	1.6e-12	11	TRIM66	8612037	8682694	tripartite motif containing 66 [Source:HGNC Symbol;Acc:HGNC:29005]	no
ENSG00000079999	-0.202	0.074	0.126	19	KEAP1	10486125	10503558	kelch like ECH associated protein 1 [Source:HGNC Symbol;Acc:HGNC:23177]	no
ENSG00000080189	0.32	0.004	0.011	20	SLC35C2	46345980	46364458	solute carrier family 35 member C2 [Source:HGNC Symbol;Acc:HGNC:17117]	no
ENSG00000080200	-0.027	0.812	0.858	3	CRYBG3	97822011	97944984	crystallin beta-gamma domain containing 3 [Source:HGNC Symbol;Acc:HGNC:34427]	no
ENSG00000080298	-0.182	0.109	0.172	9	RFX3	3218297	3526004	regulatory factor X3 [Source:HGNC Symbol;Acc:HGNC:9984]	no
ENSG00000080345	0.08	0.482	0.578	2	RIF1	151409883	151508013	replication timing regulatory factor 1 [Source:HGNC Symbol;Acc:HGNC:23207]	no
ENSG00000080371	-0.635	3.3e-10	8.4e-09	12	RAB21	71754863	71800286	RAB21, member RAS oncogene family [Source:HGNC Symbol;Acc:HGNC:18263]	no
ENSG00000080503	0.046	0.688	0.759	9	SMARCA2	1980290	2193624	SWI/SNF related, matrix associated, actin dependent regulator of chromatin, subfamily a, member 2 [Source:HGNC Symbol;Acc:HGNC:11098]	no
ENSG00000080546	-0.247	0.028	0.055	6	SESN1	108984309	109094846	sestrin 1 [Source:HGNC Symbol;Acc:HGNC:21595]	no
ENSG00000080561	0.128	0.26	0.355	X	MID2	107825755	107931637	midline 2 [Source:HGNC Symbol;Acc:HGNC:7096]	no
ENSG00000080573	-0.09	0.429	0.527	19	COL5A3	9959561	10010504	collagen type V alpha 3 chain [Source:HGNC Symbol;Acc:HGNC:14864]	no
ENSG00000196535	0.732	1.7e-14	1.7e-12	17	MYO18A	29071122	29180398	myosin XVIIIA [Source:HGNC Symbol;Acc:HGNC:31104]	no
ENSG00000080608	-0.152	0.182	0.265	9	PUM3	2720469	2844095	pumilio RNA binding family member 3 [Source:HGNC Symbol;Acc:HGNC:29676]	no
ENSG00000080644	0.081	0.477	0.573	15	CHRNA3	78593052	78621295	cholinergic receptor nicotinic alpha 3 subunit [Source:HGNC Symbol;Acc:HGNC:1957]	no
ENSG00000080709	-0.264	0.019	0.039	5	KCNN2	114055926	114496500	potassium calcium-activated channel subfamily N member 2 [Source:HGNC Symbol;Acc:HGNC:6291]	no
ENSG00000080802	-0.437	5.6e-05	0.00027	7	CNOT4	135361795	135510145	CCR4-NOT transcription complex subunit 4 [Source:HGNC Symbol;Acc:HGNC:7880]	no
ENSG00000080815	-0.582	1.8e-08	2.7e-07	14	PSEN1	73136418	73223691	presenilin 1 [Source:HGNC Symbol;Acc:HGNC:9508]	no
ENSG00000080819	-0.276	0.014	0.03	3	CPOX	98579446	98593648	coproporphyrinogen oxidase [Source:HGNC Symbol;Acc:HGNC:2321]	no
ENSG00000080822	-0.32	0.004	0.011	3	CLDND1	98497912	98523066	claudin domain containing 1 [Source:HGNC Symbol;Acc:HGNC:1322]	no
ENSG00000080823	-0.675	8.6e-12	3.6e-10	14	MOK	102224500	102305190	MOK protein kinase [Source:HGNC Symbol;Acc:HGNC:9833]	no
ENSG00000080824	-0.108	0.343	0.443	14	HSP90AA1	102080742	102139699	heat shock protein 90 alpha family class A member 1 [Source:HGNC Symbol;Acc:HGNC:5253]	no
ENSG00000080839	0.033	0.771	0.827	20	RBL1	36996349	37095997	RB transcriptional corepressor like 1 [Source:HGNC Symbol;Acc:HGNC:9893]	no
ENSG00000080845	0.12	0.292	0.389	20	DLGAP4	36306336	36528637	DLG associated protein 4 [Source:HGNC Symbol;Acc:HGNC:24476]	no
ENSG00000253729	0.73	2.3e-14	2.2e-12	8	PRKDC	47773111	47960178	protein kinase, DNA-activated, catalytic subunit [Source:HGNC Symbol;Acc:HGNC:9413]	no
ENSG00000080947	0.471	1.2e-05	7e-05	1	CROCCP3	16474396	16491307	CROCC pseudogene 3 [Source:HGNC Symbol;Acc:HGNC:29405]	no
ENSG00000080986	-0.381	0.00052	0.002	18	NDC80	2571557	2616635	NDC80 kinetochore complex component [Source:HGNC Symbol;Acc:HGNC:16909]	no
ENSG00000081014	-0.148	0.192	0.277	15	AP4E1	50908672	51005895	adaptor related protein complex 4 subunit epsilon 1 [Source:HGNC Symbol;Acc:HGNC:573]	no
ENSG00000081019	-0.561	7.7e-08	9.2e-07	1	RSBN1	113761832	113812476	round spermatid basic protein 1 [Source:HGNC Symbol;Acc:HGNC:25642]	no
ENSG00000081026	-0.103	0.364	0.465	1	MAGI3	113390515	113685923	membrane associated guanylate kinase, WW and PDZ domain containing 3 [Source:HGNC Symbol;Acc:HGNC:29647]	no
ENSG00000081051	0.211	0.062	0.108	4	AFP	73431138	73456174	alpha fetoprotein [Source:HGNC Symbol;Acc:HGNC:317]	no
ENSG00000081052	0.078	0.494	0.589	2	COL4A4	227002714	227164453	collagen type IV alpha 4 chain [Source:HGNC Symbol;Acc:HGNC:2206]	no
ENSG00000081059	-0.331	0.003	0.008	5	TCF7	134114681	134151865	transcription factor 7 [Source:HGNC Symbol;Acc:HGNC:11639]	no
ENSG00000081087	-0.435	6.2e-05	0.00029	6	OSTM1	108029245	108165854	osteoclastogenesis associated transmembrane protein 1 [Source:HGNC Symbol;Acc:HGNC:21652]	no
ENSG00000081154	-0.479	7.8e-06	4.9e-05	3	PCNP	101574180	101594465	PEST proteolytic signal containing nuclear protein [Source:HGNC Symbol;Acc:HGNC:30023]	no
ENSG00000081177	-0.219	0.052	0.093	14	EXD2	69191498	69244020	exonuclease 3'-5' domain containing 2 [Source:HGNC Symbol;Acc:HGNC:20217]	no
ENSG00000081181	0.243	0.031	0.06	14	ARG2	67619920	67651708	arginase 2 [Source:HGNC Symbol;Acc:HGNC:664]	no
ENSG00000081277	0.44	5e-05	0.00024	1	PKP1	201283452	201332993	plakophilin 1 [Source:HGNC Symbol;Acc:HGNC:9023]	no
ENSG00000081307	-0.332	0.003	0.008	3	UBA5	132654446	132679794	ubiquitin like modifier activating enzyme 5 [Source:HGNC Symbol;Acc:HGNC:23230]	no
ENSG00000081320	-0.271	0.016	0.034	2	STK17B	196133583	196176503	serine/threonine kinase 17b [Source:HGNC Symbol;Acc:HGNC:11396]	no
ENSG00000081377	-0.634	3.7e-10	9.3e-09	9	CDC14B	96490241	96619843	cell division cycle 14B [Source:HGNC Symbol;Acc:HGNC:1719]	no
ENSG00000081386	-0.343	0.002	0.006	9	ZNF510	96754553	96778129	zinc finger protein 510 [Source:HGNC Symbol;Acc:HGNC:29161]	no
ENSG00000081479	0.443	4.4e-05	0.00022	2	LRP2	169127109	169362534	LDL receptor related protein 2 [Source:HGNC Symbol;Acc:HGNC:6694]	no
ENSG00000081665	-0.216	0.056	0.098	19	ZNF506	19785839	19821751	zinc finger protein 506 [Source:HGNC Symbol;Acc:HGNC:23780]	no
ENSG00000081692	-0.113	0.32	0.418	1	JMJD4	227730425	227735411	jumonji domain containing 4 [Source:HGNC Symbol;Acc:HGNC:25724]	no
ENSG00000081721	-0.333	0.003	0.007	1	DUSP12	161749758	161757238	dual specificity phosphatase 12 [Source:HGNC Symbol;Acc:HGNC:3067]	no
ENSG00000081760	0.1	0.383	0.484	12	AACS	125065434	125143333	acetoacetyl-CoA synthetase [Source:HGNC Symbol;Acc:HGNC:21298]	no
ENSG00000081791	0.206	0.069	0.118	5	DELE1	141923855	141942047	DAP3 binding cell death enhancer 1 [Source:HGNC Symbol;Acc:HGNC:28969]	no
ENSG00000081803	-0.414	0.00015	0.00062	7	CADPS2	122318411	122886759	calcium dependent secretion activator 2 [Source:HGNC Symbol;Acc:HGNC:16018]	no
ENSG00000081842	-0.136	0.232	0.324	5	PCDHA6	140827958	141012347	protocadherin alpha 6 [Source:HGNC Symbol;Acc:HGNC:8672]	no
ENSG00000081870	-0.277	0.013	0.03	1	HSPB11	53916574	53945699	heat shock protein family B (small) member 11 [Source:HGNC Symbol;Acc:HGNC:25019]	no
ENSG00000081913	-0.211	0.062	0.108	18	PHLPP1	62715541	62980433	PH domain and leucine rich repeat protein phosphatase 1 [Source:HGNC Symbol;Acc:HGNC:20610]	no
ENSG00000081923	-0.329	0.003	0.008	18	ATP8B1	57646426	57803315	ATPase phospholipid transporting 8B1 [Source:HGNC Symbol;Acc:HGNC:3706]	no
ENSG00000082014	0.275	0.014	0.031	7	SMARCD3	151238764	151277896	SWI/SNF related, matrix associated, actin dependent regulator of chromatin, subfamily d, member 3 [Source:HGNC Symbol;Acc:HGNC:11108]	no
ENSG00000082068	-0.544	2.2e-07	2.3e-06	5	WDR70	37379285	37753435	WD repeat domain 70 [Source:HGNC Symbol;Acc:HGNC:25495]	no
ENSG00000082146	-0.093	0.416	0.515	2	STRADB	201387858	201480846	STE20 related adaptor beta [Source:HGNC Symbol;Acc:HGNC:13205]	no
ENSG00000082153	-0.117	0.306	0.404	2	BZW1	200810594	200827338	basic leucine zipper and W2 domains 1 [Source:HGNC Symbol;Acc:HGNC:18380]	no
ENSG00000082212	-0.415	0.00014	0.00059	18	ME2	50879080	50954257	malic enzyme 2 [Source:HGNC Symbol;Acc:HGNC:6984]	no
ENSG00000082213	-0.249	0.027	0.053	5	C5orf22	31532287	31555053	chromosome 5 open reading frame 22 [Source:HGNC Symbol;Acc:HGNC:25639]	no
ENSG00000082258	-0.551	1.4e-07	1.6e-06	2	CCNT2	134918235	134959342	cyclin T2 [Source:HGNC Symbol;Acc:HGNC:1600]	no
ENSG00000082269	-0.351	0.001	0.004	6	FAM135A	70412941	70561174	family with sequence similarity 135 member A [Source:HGNC Symbol;Acc:HGNC:21084]	no
ENSG00000082397	-0.21	0.063	0.109	18	EPB41L3	5392381	5630700	erythrocyte membrane protein band 4.1 like 3 [Source:HGNC Symbol;Acc:HGNC:3380]	no
ENSG00000082438	-0.254	0.024	0.048	2	COBLL1	164653624	164843679	cordon-bleu WH2 repeat protein like 1 [Source:HGNC Symbol;Acc:HGNC:23571]	no
ENSG00000082458	-0.125	0.273	0.369	X	DLG3	70444835	70505490	discs large MAGUK scaffold protein 3 [Source:HGNC Symbol;Acc:HGNC:2902]	no
ENSG00000082497	-0.292	0.009	0.021	1	SERTAD4	210232796	210246631	SERTA domain containing 4 [Source:HGNC Symbol;Acc:HGNC:25236]	no
ENSG00000082512	0.038	0.741	0.803	1	TRAF5	211326615	211374946	TNF receptor associated factor 5 [Source:HGNC Symbol;Acc:HGNC:12035]	no
ENSG00000082515	-0.347	0.002	0.005	5	MRPL22	154941073	154969411	mitochondrial ribosomal protein L22 [Source:HGNC Symbol;Acc:HGNC:14480]	no
ENSG00000082516	-0.236	0.036	0.069	5	GEMIN5	154887411	154938211	gem nuclear organelle associated protein 5 [Source:HGNC Symbol;Acc:HGNC:20043]	no
ENSG00000082641	0.202	0.074	0.125	17	NFE2L1	48048329	48061545	NFE2 like bZIP transcription factor 1 [Source:HGNC Symbol;Acc:HGNC:7781]	no
ENSG00000082684	0.019	0.87	0.904	3	SEMA5B	122909082	123028605	semaphorin 5B [Source:HGNC Symbol;Acc:HGNC:10737]	no
ENSG00000082701	-0.375	0.00066	0.002	3	GSK3B	119821321	120094994	glycogen synthase kinase 3 beta [Source:HGNC Symbol;Acc:HGNC:4617]	no
ENSG00000082781	-0.149	0.191	0.276	3	ITGB5	124761948	124901418	integrin subunit beta 5 [Source:HGNC Symbol;Acc:HGNC:6160]	no
ENSG00000082805	-0.434	6.4e-05	0.0003	12	ERC1	990509	1495933	ELKS/RAB6-interacting/CAST family member 1 [Source:HGNC Symbol;Acc:HGNC:17072]	no
ENSG00000082898	-0.488	5e-06	3.3e-05	2	XPO1	61476032	61538741	exportin 1 [Source:HGNC Symbol;Acc:HGNC:12825]	no
ENSG00000082996	-0.463	1.7e-05	9.4e-05	3	RNF13	149812770	149962139	ring finger protein 13 [Source:HGNC Symbol;Acc:HGNC:10057]	no
ENSG00000083067	0.181	0.11	0.174	9	TRPM3	70529060	71446904	transient receptor potential cation channel subfamily M member 3 [Source:HGNC Symbol;Acc:HGNC:17992]	no
ENSG00000083093	-0.542	2.4e-07	2.5e-06	16	PALB2	23603160	23641321	partner and localizer of BRCA2 [Source:HGNC Symbol;Acc:HGNC:26144]	no
ENSG00000083097	0.131	0.251	0.345	6	DOP1A	83067666	83171350	DOP1 leucine zipper like protein A [Source:HGNC Symbol;Acc:HGNC:21194]	no
ENSG00000083099	-0.111	0.329	0.428	6	LYRM2	89568144	89638749	LYR motif containing 2 [Source:HGNC Symbol;Acc:HGNC:25229]	no
ENSG00000083123	-0.705	4.2e-13	2.5e-11	6	BCKDHB	80106647	80346270	branched chain keto acid dehydrogenase E1 subunit beta [Source:HGNC Symbol;Acc:HGNC:987]	no
ENSG00000083168	0.145	0.203	0.29	8	KAT6A	41929479	42051994	lysine acetyltransferase 6A [Source:HGNC Symbol;Acc:HGNC:13013]	no
ENSG00000083223	0.06	0.601	0.686	9	TUT7	86287733	86354454	terminal uridylyl transferase 7 [Source:HGNC Symbol;Acc:HGNC:25817]	no
ENSG00000083290	0.274	0.015	0.032	17	ULK2	19770829	19867936	unc-51 like autophagy activating kinase 2 [Source:HGNC Symbol;Acc:HGNC:13480]	no
ENSG00000083307	-0.284	0.011	0.026	8	GRHL2	101492439	101669726	grainyhead like transcription factor 2 [Source:HGNC Symbol;Acc:HGNC:2799]	no
ENSG00000083312	-0.454	2.7e-05	0.00014	5	TNPO1	72816312	72916733	transportin 1 [Source:HGNC Symbol;Acc:HGNC:6401]	no
ENSG00000083444	-0.217	0.055	0.098	1	PLOD1	11934205	11975538	procollagen-lysine,2-oxoglutarate 5-dioxygenase 1 [Source:HGNC Symbol;Acc:HGNC:9081]	no
ENSG00000266970	0.73	2.3e-14	2.2e-12	17	SOCS3-DT	78360376	78373911	SOCS3 divergent transcript [Source:HGNC Symbol;Acc:HGNC:52799]	no
ENSG00000083457	-0.387	0.00043	0.002	17	ITGAE	3714628	3801188	integrin subunit alpha E [Source:HGNC Symbol;Acc:HGNC:6147]	no
ENSG00000083520	-0.394	0.00032	0.001	13	DIS3	72752169	72782096	DIS3 homolog, exosome endoribonuclease and 3'-5' exoribonuclease [Source:HGNC Symbol;Acc:HGNC:20604]	no
ENSG00000083535	-0.692	1.6e-12	8.1e-11	13	PIBF1	72782133	73016461	progesterone immunomodulatory binding factor 1 [Source:HGNC Symbol;Acc:HGNC:23352]	no
ENSG00000083544	-0.071	0.534	0.626	13	TDRD3	60396457	60573878	tudor domain containing 3 [Source:HGNC Symbol;Acc:HGNC:20612]	no
ENSG00000083635	-0.06	0.6	0.685	13	NUFIP1	44939249	44989471	nuclear FMR1 interacting protein 1 [Source:HGNC Symbol;Acc:HGNC:8057]	no
ENSG00000083642	-0.473	1.1e-05	6.4e-05	13	PDS5B	32586452	32778019	PDS5 cohesin associated factor B [Source:HGNC Symbol;Acc:HGNC:20418]	no
ENSG00000083720	-0.215	0.057	0.1	5	OXCT1	41730065	41870425	3-oxoacid CoA-transferase 1 [Source:HGNC Symbol;Acc:HGNC:8527]	no
ENSG00000083750	-0.008	0.943	0.957	X	RRAGB	55717749	55758774	Ras related GTP binding B [Source:HGNC Symbol;Acc:HGNC:19901]	no
ENSG00000083799	-0.188	0.098	0.158	16	CYLD	50742050	50801935	CYLD lysine 63 deubiquitinase [Source:HGNC Symbol;Acc:HGNC:2584]	no
ENSG00000286588	0.729	2.5e-14	2.4e-12	2	ENSG00000286588	241326334	241327039	novel transcript, antisense to SEPT2	no
ENSG00000083812	0.055	0.633	0.712	19	ZNF324	58467056	58475436	zinc finger protein 324 [Source:HGNC Symbol;Acc:HGNC:14096]	no
ENSG00000083814	-0.201	0.076	0.128	19	ZNF671	57719751	57727624	zinc finger protein 671 [Source:HGNC Symbol;Acc:HGNC:26279]	no
ENSG00000083817	-0.166	0.143	0.217	19	ZNF416	57571566	57578911	zinc finger protein 416 [Source:HGNC Symbol;Acc:HGNC:20645]	no
ENSG00000083828	-0.028	0.805	0.853	19	ZNF586	57769655	57819939	zinc finger protein 586 [Source:HGNC Symbol;Acc:HGNC:25949]	no
ENSG00000083838	0.118	0.302	0.4	19	ZNF446	58474017	58481230	zinc finger protein 446 [Source:HGNC Symbol;Acc:HGNC:21036]	no
ENSG00000083844	0.177	0.119	0.185	19	ZNF264	57191500	57222846	zinc finger protein 264 [Source:HGNC Symbol;Acc:HGNC:13057]	no
ENSG00000083845	0.167	0.142	0.215	19	RPS5	58386400	58394806	ribosomal protein S5 [Source:HGNC Symbol;Acc:HGNC:10426]	no
ENSG00000129048	0.728	3.1e-14	2.8e-12	3	ACKR4	132597270	132618967	atypical chemokine receptor 4 [Source:HGNC Symbol;Acc:HGNC:1611]	no
ENSG00000083896	0.287	0.01	0.023	4	YTHDC1	68310387	68350090	YTH domain containing 1 [Source:HGNC Symbol;Acc:HGNC:30626]	no
ENSG00000083937	-0.437	5.6e-05	0.00027	3	CHMP2B	87227271	87255556	charged multivesicular body protein 2B [Source:HGNC Symbol;Acc:HGNC:24537]	no
ENSG00000084070	-0.005	0.963	0.973	1	SMAP2	40344850	40423326	small ArfGAP2 [Source:HGNC Symbol;Acc:HGNC:25082]	no
ENSG00000084072	0.031	0.786	0.839	1	PPIE	39692182	39763914	peptidylprolyl isomerase E [Source:HGNC Symbol;Acc:HGNC:9258]	no
ENSG00000084073	-0.449	3.4e-05	0.00017	1	ZMPSTE24	40258041	40294180	zinc metallopeptidase STE24 [Source:HGNC Symbol;Acc:HGNC:12877]	no
ENSG00000084090	-0.125	0.274	0.37	2	STARD7	96184859	96208827	StAR related lipid transfer domain containing 7 [Source:HGNC Symbol;Acc:HGNC:18063]	no
ENSG00000084092	0.095	0.403	0.503	4	NOA1	56963350	56977606	nitric oxide associated 1 [Source:HGNC Symbol;Acc:HGNC:28473]	no
ENSG00000084093	-0.547	1.8e-07	2e-06	4	REST	56907876	56966808	RE1 silencing transcription factor [Source:HGNC Symbol;Acc:HGNC:9966]	no
ENSG00000163958	0.727	3.5e-14	3.1e-12	3	ZDHHC19	196197452	196211437	zinc finger DHHC-type palmitoyltransferase 19 [Source:HGNC Symbol;Acc:HGNC:20713]	no
ENSG00000084207	0.078	0.494	0.589	11	GSTP1	67583742	67586656	glutathione S-transferase pi 1 [Source:HGNC Symbol;Acc:HGNC:4638]	no
ENSG00000084234	-0.383	0.00049	0.002	11	APLP2	130068147	130144811	amyloid beta precursor like protein 2 [Source:HGNC Symbol;Acc:HGNC:598]	no
ENSG00000084444	-0.108	0.344	0.444	12	FAM234B	13044381	13142521	family with sequence similarity 234 member B [Source:HGNC Symbol;Acc:HGNC:29288]	no
ENSG00000084453	0.124	0.276	0.372	12	SLCO1A2	21264600	21419594	solute carrier organic anion transporter family member 1A2 [Source:HGNC Symbol;Acc:HGNC:10956]	no
ENSG00000084463	-0.191	0.092	0.15	12	WBP11	14784582	14803486	WW domain binding protein 11 [Source:HGNC Symbol;Acc:HGNC:16461]	no
ENSG00000084623	-0.12	0.292	0.39	1	EIF3I	32221077	32245397	eukaryotic translation initiation factor 3 subunit I [Source:HGNC Symbol;Acc:HGNC:3272]	no
ENSG00000084628	-0.105	0.359	0.459	1	NKAIN1	31179745	31239887	sodium/potassium transporting ATPase interacting 1 [Source:HGNC Symbol;Acc:HGNC:25743]	no
ENSG00000084636	0.193	0.088	0.144	1	COL16A1	31652263	31704319	collagen type XVI alpha 1 chain [Source:HGNC Symbol;Acc:HGNC:2193]	no
ENSG00000084652	0.478	8.5e-06	5.3e-05	1	TXLNA	32179675	32198285	taxilin alpha [Source:HGNC Symbol;Acc:HGNC:30685]	no
ENSG00000084676	-0.338	0.002	0.007	2	NCOA1	24491254	24770702	nuclear receptor coactivator 1 [Source:HGNC Symbol;Acc:HGNC:7668]	no
ENSG00000084693	-0.48	7.7e-06	4.9e-05	2	AGBL5	27042364	27070622	AGBL carboxypeptidase 5 [Source:HGNC Symbol;Acc:HGNC:26147]	no
ENSG00000084710	0.485	6e-06	3.9e-05	2	EFR3B	25042076	25159135	EFR3 homolog B [Source:HGNC Symbol;Acc:HGNC:29155]	no
ENSG00000084731	-0.322	0.004	0.01	2	KIF3C	25926598	25982749	kinesin family member 3C [Source:HGNC Symbol;Acc:HGNC:6321]	no
ENSG00000084733	-0.654	6.3e-11	2e-09	2	RAB10	26034084	26137454	RAB10, member RAS oncogene family [Source:HGNC Symbol;Acc:HGNC:9759]	no
ENSG00000084754	-0.496	3.4e-06	2.4e-05	2	HADHA	26190635	26244672	hydroxyacyl-CoA dehydrogenase trifunctional multienzyme complex subunit alpha [Source:HGNC Symbol;Acc:HGNC:4801]	no
ENSG00000084764	0.413	0.00015	0.00063	2	MAPRE3	26970637	27027219	microtubule associated protein RP/EB family member 3 [Source:HGNC Symbol;Acc:HGNC:6892]	no
ENSG00000286360	0.727	3.4e-14	3.1e-12	2	ENSG00000286360	61878940	61881353	novel transcript, antisense to CCT4	no
ENSG00000085063	0.191	0.092	0.15	11	CD59	33703010	33736479	CD59 molecule (CD59 blood group) [Source:HGNC Symbol;Acc:HGNC:1689]	no
ENSG00000085117	-0.213	0.06	0.104	11	CD82	44564427	44620358	CD82 molecule [Source:HGNC Symbol;Acc:HGNC:6210]	no
ENSG00000085185	0.036	0.751	0.81	X	BCORL1	129981107	130058071	BCL6 corepressor like 1 [Source:HGNC Symbol;Acc:HGNC:25657]	no
ENSG00000085224	0.167	0.14	0.213	X	ATRX	77504880	77786233	ATRX chromatin remodeler [Source:HGNC Symbol;Acc:HGNC:886]	no
ENSG00000085231	-0.285	0.011	0.025	5	AK6	69350984	69370013	adenylate kinase 6 [Source:HGNC Symbol;Acc:HGNC:49151]	no
ENSG00000085274	-0.588	1.3e-08	2e-07	3	MYNN	169773396	169789716	myoneurin [Source:HGNC Symbol;Acc:HGNC:14955]	no
ENSG00000085276	-0.108	0.341	0.442	3	MECOM	169083499	169663775	MDS1 and EVI1 complex locus [Source:HGNC Symbol;Acc:HGNC:3498]	no
ENSG00000085365	-0.544	2.2e-07	2.3e-06	5	SCAMP1	78360611	78480739	secretory carrier membrane protein 1 [Source:HGNC Symbol;Acc:HGNC:10563]	no
ENSG00000085377	-0.23	0.041	0.076	6	PREP	105273218	105454062	prolyl endopeptidase [Source:HGNC Symbol;Acc:HGNC:9358]	no
ENSG00000085382	-0.553	1.3e-07	1.4e-06	6	HACE1	104728094	104859919	HECT domain and ankyrin repeat containing E3 ubiquitin protein ligase 1 [Source:HGNC Symbol;Acc:HGNC:21033]	no
ENSG00000085415	-0.472	1.1e-05	6.6e-05	18	SEH1L	12947133	12987536	SEH1 like nucleoporin [Source:HGNC Symbol;Acc:HGNC:30379]	no
ENSG00000085433	-0.139	0.223	0.314	1	WDR47	108970214	109042113	WD repeat domain 47 [Source:HGNC Symbol;Acc:HGNC:29141]	no
ENSG00000085449	-0.496	3.3e-06	2.3e-05	2	WDFY1	223855716	223945357	WD repeat and FYVE domain containing 1 [Source:HGNC Symbol;Acc:HGNC:20451]	no
ENSG00000085465	0.357	0.001	0.004	1	OVGP1	111414319	111427735	oviductal glycoprotein 1 [Source:HGNC Symbol;Acc:HGNC:8524]	no
ENSG00000085491	0.09	0.429	0.527	1	SLC25A24	108134043	108200849	solute carrier family 25 member 24 [Source:HGNC Symbol;Acc:HGNC:20662]	no
ENSG00000085511	-0.118	0.301	0.399	6	MAP3K4	160991727	161117385	mitogen-activated protein kinase kinase kinase 4 [Source:HGNC Symbol;Acc:HGNC:6856]	no
ENSG00000085514	0.458	2.2e-05	0.00012	7	PILRA	100367530	100400096	paired immunoglobin like type 2 receptor alpha [Source:HGNC Symbol;Acc:HGNC:20396]	no
ENSG00000085552	0.071	0.534	0.626	1	IGSF9	159927039	159945613	immunoglobulin superfamily member 9 [Source:HGNC Symbol;Acc:HGNC:18132]	no
ENSG00000085644	0.435	6.2e-05	0.00029	16	ZNF213	3129777	3142804	zinc finger protein 213 [Source:HGNC Symbol;Acc:HGNC:13005]	no
ENSG00000085662	-0.187	0.1	0.16	7	AKR1B1	134442356	134459284	aldo-keto reductase family 1 member B [Source:HGNC Symbol;Acc:HGNC:381]	no
ENSG00000085719	-0.159	0.162	0.24	8	CPNE3	86514435	86561498	copine 3 [Source:HGNC Symbol;Acc:HGNC:2316]	no
ENSG00000085721	-0.192	0.091	0.148	16	RRN3	15060033	15094311	RRN3 homolog, RNA polymerase I transcription factor [Source:HGNC Symbol;Acc:HGNC:30346]	no
ENSG00000085733	0.037	0.748	0.808	11	CTTN	70398404	70436584	cortactin [Source:HGNC Symbol;Acc:HGNC:3338]	no
ENSG00000085760	-0.27	0.016	0.034	2	MTIF2	55236595	55269347	mitochondrial translational initiation factor 2 [Source:HGNC Symbol;Acc:HGNC:7441]	no
ENSG00000085788	-0.159	0.162	0.24	8	DDHD2	38225218	38275558	DDHD domain containing 2 [Source:HGNC Symbol;Acc:HGNC:29106]	no
ENSG00000085831	-0.4	0.00026	0.00099	1	TTC39A	51287258	51345116	tetratricopeptide repeat domain 39A [Source:HGNC Symbol;Acc:HGNC:18657]	no
ENSG00000085832	-0.373	0.00072	0.002	1	EPS15	51354263	51519328	epidermal growth factor receptor pathway substrate 15 [Source:HGNC Symbol;Acc:HGNC:3419]	no
ENSG00000085840	-0.237	0.036	0.068	1	ORC1	52372829	52404423	origin recognition complex subunit 1 [Source:HGNC Symbol;Acc:HGNC:8487]	no
ENSG00000182534	0.726	3.5e-14	3.1e-12	17	MXRA7	76672551	76711004	matrix remodeling associated 7 [Source:HGNC Symbol;Acc:HGNC:7541]	no
ENSG00000085872	0.327	0.003	0.009	19	CHERP	16517894	16542437	calcium homeostasis endoplasmic reticulum protein [Source:HGNC Symbol;Acc:HGNC:16930]	no
ENSG00000085978	-0.341	0.002	0.006	2	ATG16L1	233210051	233295674	autophagy related 16 like 1 [Source:HGNC Symbol;Acc:HGNC:21498]	no
ENSG00000085982	0.398	0.00028	0.001	2	USP40	233475526	233566782	ubiquitin specific peptidase 40 [Source:HGNC Symbol;Acc:HGNC:20069]	no
ENSG00000085998	0.152	0.18	0.262	1	POMGNT1	46188683	46220305	protein O-linked mannose N-acetylglucosaminyltransferase 1 (beta 1,2-) [Source:HGNC Symbol;Acc:HGNC:19139]	no
ENSG00000085999	0.194	0.086	0.142	1	RAD54L	46246461	46278480	RAD54 like [Source:HGNC Symbol;Acc:HGNC:9826]	no
ENSG00000086015	-0.184	0.105	0.168	1	MAST2	45786987	46036122	microtubule associated serine/threonine kinase 2 [Source:HGNC Symbol;Acc:HGNC:19035]	no
ENSG00000086061	-0.573	3.4e-08	4.6e-07	9	DNAJA1	33025273	33039907	DnaJ heat shock protein family (Hsp40) member A1 [Source:HGNC Symbol;Acc:HGNC:5229]	no
ENSG00000086062	0.098	0.389	0.49	9	B4GALT1	33104082	33167356	beta-1,4-galactosyltransferase 1 [Source:HGNC Symbol;Acc:HGNC:924]	no
ENSG00000086065	-0.363	0.001	0.003	9	CHMP5	33264879	33282070	charged multivesicular body protein 5 [Source:HGNC Symbol;Acc:HGNC:26942]	no
ENSG00000086102	-0.197	0.082	0.137	9	NFX1	33290512	33371157	nuclear transcription factor, X-box binding 1 [Source:HGNC Symbol;Acc:HGNC:7803]	no
ENSG00000086189	-0.384	0.00047	0.002	5	DIMT1	62347284	62403943	DIM1 rRNA methyltransferase and ribosome maturation factor [Source:HGNC Symbol;Acc:HGNC:30217]	no
ENSG00000086200	-0.501	2.6e-06	1.9e-05	5	IPO11	62403972	62628582	importin 11 [Source:HGNC Symbol;Acc:HGNC:20628]	no
ENSG00000086232	-0.498	3e-06	2.2e-05	7	EIF2AK1	6022247	6059175	eukaryotic translation initiation factor 2 alpha kinase 1 [Source:HGNC Symbol;Acc:HGNC:24921]	no
ENSG00000086289	-0.179	0.114	0.179	7	EPDR1	37920640	37951936	ependymin related 1 [Source:HGNC Symbol;Acc:HGNC:17572]	no
ENSG00000086300	-0.396	0.0003	0.001	7	SNX10	26291862	26374383	sorting nexin 10 [Source:HGNC Symbol;Acc:HGNC:14974]	no
ENSG00000086475	-0.197	0.082	0.136	10	SEPHS1	13317428	13348298	selenophosphate synthetase 1 [Source:HGNC Symbol;Acc:HGNC:19685]	no
ENSG00000086504	0.063	0.579	0.666	16	MRPL28	366969	371289	mitochondrial ribosomal protein L28 [Source:HGNC Symbol;Acc:HGNC:14484]	no
ENSG00000086544	-0.053	0.644	0.722	19	ITPKC	40717112	40740860	inositol-trisphosphate 3-kinase C [Source:HGNC Symbol;Acc:HGNC:14897]	no
ENSG00000262580	0.726	3.6e-14	3.2e-12	17	ENSG00000262580	80200673	80205949	novel transcript, antisense to CARD14	no
ENSG00000086589	-0.44	4.9e-05	0.00024	5	RBM22	150690792	150701077	RNA binding motif protein 22 [Source:HGNC Symbol;Acc:HGNC:25503]	no
ENSG00000086598	-0.249	0.027	0.053	12	TMED2	123584533	123598582	transmembrane p24 trafficking protein 2 [Source:HGNC Symbol;Acc:HGNC:16996]	no
ENSG00000086619	-0.266	0.018	0.037	1	ERO1B	236214681	236282019	endoplasmic reticulum oxidoreductase 1 beta [Source:HGNC Symbol;Acc:HGNC:14355]	no
ENSG00000086666	-0.496	3.3e-06	2.3e-05	15	ZFAND6	80059568	80138393	zinc finger AN1-type containing 6 [Source:HGNC Symbol;Acc:HGNC:30164]	no
ENSG00000086712	-0.47	1.2e-05	7.1e-05	X	TXLNG	16786432	16844519	taxilin gamma [Source:HGNC Symbol;Acc:HGNC:18578]	no
ENSG00000086758	0.688	2.4e-12	1.2e-10	X	HUWE1	53532096	53686752	HECT, UBA and WWE domain containing E3 ubiquitin protein ligase 1 [Source:HGNC Symbol;Acc:HGNC:30892]	no
ENSG00000086827	-0.391	0.00036	0.001	11	ZW10	113733187	113773735	zw10 kinetochore protein [Source:HGNC Symbol;Acc:HGNC:13194]	no
ENSG00000086848	-0.179	0.114	0.18	11	ALG9	111782195	111871581	ALG9 alpha-1,2-mannosyltransferase [Source:HGNC Symbol;Acc:HGNC:15672]	no
ENSG00000086967	0.146	0.2	0.286	19	MYBPC2	50432892	50466321	myosin binding protein C2 [Source:HGNC Symbol;Acc:HGNC:7550]	no
ENSG00000087008	-0.213	0.059	0.104	4	ACOX3	8366282	8440723	acyl-CoA oxidase 3, pristanoyl [Source:HGNC Symbol;Acc:HGNC:121]	no
ENSG00000087053	-0.594	7.9e-09	1.3e-07	11	MTMR2	95821766	95925315	myotubularin related protein 2 [Source:HGNC Symbol;Acc:HGNC:7450]	no
ENSG00000087074	-0.136	0.232	0.324	19	PPP1R15A	48872212	48876059	protein phosphatase 1 regulatory subunit 15A [Source:HGNC Symbol;Acc:HGNC:14375]	no
ENSG00000087076	-0.069	0.547	0.639	19	HSD17B14	48813018	48836510	hydroxysteroid 17-beta dehydrogenase 14 [Source:HGNC Symbol;Acc:HGNC:23238]	no
ENSG00000087077	0.183	0.106	0.169	7	TRIP6	100867387	100873454	thyroid hormone receptor interactor 6 [Source:HGNC Symbol;Acc:HGNC:12311]	no
ENSG00000087085	0.061	0.595	0.68	7	ACHE	100889994	100896974	acetylcholinesterase (Cartwright blood group) [Source:HGNC Symbol;Acc:HGNC:108]	no
ENSG00000087086	0.163	0.152	0.228	19	FTL	48965309	48966879	ferritin light chain [Source:HGNC Symbol;Acc:HGNC:3999]	no
ENSG00000087087	-0.364	0.00098	0.003	7	SRRT	100875103	100888664	serrate, RNA effector molecule [Source:HGNC Symbol;Acc:HGNC:24101]	no
ENSG00000087088	0.126	0.267	0.362	19	BAX	48954815	48961798	BCL2 associated X, apoptosis regulator [Source:HGNC Symbol;Acc:HGNC:959]	no
ENSG00000087095	-0.515	1.2e-06	9.5e-06	17	NLK	28041737	28196381	nemo like kinase [Source:HGNC Symbol;Acc:HGNC:29858]	no
ENSG00000087111	0.394	0.00033	0.001	17	PIGS	28553383	28571794	phosphatidylinositol glycan anchor biosynthesis class S [Source:HGNC Symbol;Acc:HGNC:14937]	no
ENSG00000087116	0.234	0.038	0.072	5	ADAMTS2	179110853	179345461	ADAM metallopeptidase with thrombospondin type 1 motif 2 [Source:HGNC Symbol;Acc:HGNC:218]	no
ENSG00000087128	-0.12	0.292	0.389	4	TMPRSS11E	68447463	68497604	transmembrane serine protease 11E [Source:HGNC Symbol;Acc:HGNC:24465]	no
ENSG00000087152	-0.286	0.011	0.024	17	ATXN7L3	44191805	44200113	ataxin 7 like 3 [Source:HGNC Symbol;Acc:HGNC:25416]	no
ENSG00000087157	0.124	0.277	0.373	17	PGS1	78378649	78425114	phosphatidylglycerophosphate synthase 1 [Source:HGNC Symbol;Acc:HGNC:30029]	no
ENSG00000087191	0.065	0.572	0.66	17	PSMC5	63827152	63832026	proteasome 26S subunit, ATPase 5 [Source:HGNC Symbol;Acc:HGNC:9552]	no
ENSG00000087206	0.349	0.002	0.005	5	UIMC1	176905005	177022633	ubiquitin interaction motif containing 1 [Source:HGNC Symbol;Acc:HGNC:30298]	no
ENSG00000087245	0.246	0.029	0.057	16	MMP2	55389700	55506691	matrix metallopeptidase 2 [Source:HGNC Symbol;Acc:HGNC:7166]	no
ENSG00000087253	0.431	7.4e-05	0.00034	16	LPCAT2	55509072	55586666	lysophosphatidylcholine acyltransferase 2 [Source:HGNC Symbol;Acc:HGNC:26032]	no
ENSG00000172247	0.725	4.2e-14	3.6e-12	11	C1QTNF4	47589667	47594411	C1q and TNF related 4 [Source:HGNC Symbol;Acc:HGNC:14346]	no
ENSG00000087263	-0.467	1.5e-05	8.3e-05	16	OGFOD1	56451521	56479104	2-oxoglutarate and iron dependent oxygenase domain containing 1 [Source:HGNC Symbol;Acc:HGNC:25585]	no
ENSG00000223705	0.725	4.2e-14	3.6e-12	7	NSUN5P1	75410368	75416597	NSUN5 pseudogene 1 [Source:HGNC Symbol;Acc:HGNC:19146]	no
ENSG00000087269	-0.344	0.002	0.006	4	NOP14	2937933	2963406	NOP14 nucleolar protein [Source:HGNC Symbol;Acc:HGNC:16821]	no
ENSG00000087274	-0.165	0.146	0.22	4	ADD1	2843844	2930076	adducin 1 [Source:HGNC Symbol;Acc:HGNC:243]	no
ENSG00000087299	-0.178	0.116	0.182	14	L2HGDH	50237563	50312229	L-2-hydroxyglutarate dehydrogenase [Source:HGNC Symbol;Acc:HGNC:20499]	no
ENSG00000087301	0.001	0.99	0.992	14	TXNDC16	52430596	52552522	thioredoxin domain containing 16 [Source:HGNC Symbol;Acc:HGNC:19965]	no
ENSG00000087302	-0.256	0.023	0.046	14	RTRAF	51989514	52010694	RNA transcription, translation and transport factor [Source:HGNC Symbol;Acc:HGNC:23169]	no
ENSG00000087303	-0.137	0.227	0.318	14	NID2	52004809	52069059	nidogen 2 [Source:HGNC Symbol;Acc:HGNC:13389]	no
ENSG00000087338	-0.505	2e-06	1.5e-05	2	GMCL1	69829660	69881384	germ cell-less 1, spermatogenesis associated [Source:HGNC Symbol;Acc:HGNC:23843]	no
ENSG00000087365	0.189	0.096	0.155	11	SF3B2	66050729	66069308	splicing factor 3b subunit 2 [Source:HGNC Symbol;Acc:HGNC:10769]	no
ENSG00000087448	-0.559	8.4e-08	1e-06	12	KLHL42	27780048	27803040	kelch like family member 42 [Source:HGNC Symbol;Acc:HGNC:29252]	no
ENSG00000087460	-0.475	9.6e-06	5.8e-05	20	GNAS	58839718	58911192	GNAS complex locus [Source:HGNC Symbol;Acc:HGNC:4392]	no
ENSG00000087470	-0.199	0.078	0.131	12	DNM1L	32679200	32745650	dynamin 1 like [Source:HGNC Symbol;Acc:HGNC:2973]	no
ENSG00000087502	-0.386	0.00044	0.002	12	ERGIC2	29337352	29381189	ERGIC and golgi 2 [Source:HGNC Symbol;Acc:HGNC:30208]	no
ENSG00000087510	-0.126	0.27	0.366	20	TFAP2C	56629306	56639283	transcription factor AP-2 gamma [Source:HGNC Symbol;Acc:HGNC:11744]	no
ENSG00000087586	-0.162	0.155	0.231	20	AURKA	56369389	56392337	aurora kinase A [Source:HGNC Symbol;Acc:HGNC:11393]	no
ENSG00000087842	0.146	0.199	0.285	X	PIR	15384799	15493564	pirin [Source:HGNC Symbol;Acc:HGNC:30048]	no
ENSG00000087884	0.123	0.279	0.376	11	AAMDC	77821109	77918432	adipogenesis associated Mth938 domain containing [Source:HGNC Symbol;Acc:HGNC:30205]	no
ENSG00000087903	-0.087	0.446	0.543	19	RFX2	5993164	6199572	regulatory factor X2 [Source:HGNC Symbol;Acc:HGNC:9983]	no
ENSG00000087995	-0.044	0.698	0.767	17	METTL2A	62423875	62453385	methyltransferase 2A, methylcytidine [Source:HGNC Symbol;Acc:HGNC:25755]	no
ENSG00000088035	-0.54	2.7e-07	2.7e-06	1	ALG6	63367575	63438553	ALG6 alpha-1,3-glucosyltransferase [Source:HGNC Symbol;Acc:HGNC:23157]	no
ENSG00000088038	0.144	0.205	0.293	19	CNOT3	54137749	54155681	CCR4-NOT transcription complex subunit 3 [Source:HGNC Symbol;Acc:HGNC:7879]	no
ENSG00000088179	-0.152	0.182	0.264	2	PTPN4	119759922	119984899	protein tyrosine phosphatase non-receptor type 4 [Source:HGNC Symbol;Acc:HGNC:9656]	no
ENSG00000088205	-0.3	0.007	0.017	2	DDX18	117814691	117832377	DEAD-box helicase 18 [Source:HGNC Symbol;Acc:HGNC:2741]	no
ENSG00000088247	0.1	0.382	0.483	19	KHSRP	6413102	6424811	KH-type splicing regulatory protein [Source:HGNC Symbol;Acc:HGNC:6316]	no
ENSG00000088256	0.22	0.051	0.092	19	GNA11	3094362	3123999	G protein subunit alpha 11 [Source:HGNC Symbol;Acc:HGNC:4379]	no
ENSG00000088280	0.148	0.192	0.277	1	ASAP3	23428563	23484568	ArfGAP with SH3 domain, ankyrin repeat and PH domain 3 [Source:HGNC Symbol;Acc:HGNC:14987]	no
ENSG00000088298	0.474	1e-05	6.1e-05	20	EDEM2	35115364	35147336	ER degradation enhancing alpha-mannosidase like protein 2 [Source:HGNC Symbol;Acc:HGNC:15877]	no
ENSG00000088305	-0.243	0.031	0.06	20	DNMT3B	32762385	32809359	DNA methyltransferase 3 beta [Source:HGNC Symbol;Acc:HGNC:2979]	no
ENSG00000088325	-0.266	0.018	0.037	20	TPX2	31739271	31801805	TPX2 microtubule nucleation factor [Source:HGNC Symbol;Acc:HGNC:1249]	no
ENSG00000088340	0.167	0.141	0.214	20	FER1L4	35558737	35607562	fer-1 like family member 4 (pseudogene) [Source:HGNC Symbol;Acc:HGNC:15801]	no
ENSG00000088356	-0.088	0.442	0.54	20	PDRG1	31944337	31952046	p53 and DNA damage regulated 1 [Source:HGNC Symbol;Acc:HGNC:16119]	no
ENSG00000088367	-0.182	0.108	0.172	20	EPB41L1	36091504	36232799	erythrocyte membrane protein band 4.1 like 1 [Source:HGNC Symbol;Acc:HGNC:3378]	no
ENSG00000088386	0.36	0.001	0.004	13	SLC15A1	98683801	98752672	solute carrier family 15 member 1 [Source:HGNC Symbol;Acc:HGNC:10920]	no
ENSG00000088387	0.277	0.013	0.029	13	DOCK9	98793429	99086625	dedicator of cytokinesis 9 [Source:HGNC Symbol;Acc:HGNC:14132]	no
ENSG00000088448	0.297	0.008	0.019	13	ANKRD10	110878540	110915069	ankyrin repeat domain 10 [Source:HGNC Symbol;Acc:HGNC:20265]	no
ENSG00000088451	-0.611	2.2e-09	4.2e-08	13	TGDS	94574054	94596242	TDP-glucose 4,6-dehydratase [Source:HGNC Symbol;Acc:HGNC:20324]	no
ENSG00000225507	0.725	4.3e-14	3.7e-12	7	ENSG00000225507	47956793	47957318	pseudogene similar to part of TTK protein kinase TTK	no
ENSG00000088543	0.279	0.013	0.028	3	C3orf18	50558025	50571027	chromosome 3 open reading frame 18 [Source:HGNC Symbol;Acc:HGNC:24837]	no
ENSG00000088682	-0.243	0.031	0.06	16	COQ9	57447425	57461270	coenzyme Q9 [Source:HGNC Symbol;Acc:HGNC:25302]	no
ENSG00000088727	0.038	0.741	0.803	3	KIF9	47227998	47283451	kinesin family member 9 [Source:HGNC Symbol;Acc:HGNC:16666]	no
ENSG00000088756	-0.322	0.004	0.01	18	ARHGAP28	6729716	6915716	Rho GTPase activating protein 28 [Source:HGNC Symbol;Acc:HGNC:25509]	no
ENSG00000088808	0.213	0.059	0.104	14	PPP1R13B	103733195	103847575	protein phosphatase 1 regulatory subunit 13B [Source:HGNC Symbol;Acc:HGNC:14950]	no
ENSG00000088812	0.049	0.671	0.744	20	ATRN	3471018	3651118	attractin [Source:HGNC Symbol;Acc:HGNC:885]	no
ENSG00000088826	0.135	0.237	0.329	20	SMOX	4120980	4187747	spermine oxidase [Source:HGNC Symbol;Acc:HGNC:15862]	no
ENSG00000088832	-0.109	0.338	0.438	20	FKBP1A	1368977	1393164	FKBP prolyl isomerase 1A [Source:HGNC Symbol;Acc:HGNC:3711]	no
ENSG00000088833	-0.127	0.263	0.358	20	NSFL1C	1442162	1473842	NSFL1 cofactor [Source:HGNC Symbol;Acc:HGNC:15912]	no
ENSG00000088836	0.116	0.31	0.408	20	SLC4A11	3227417	3239559	solute carrier family 4 member 11 [Source:HGNC Symbol;Acc:HGNC:16438]	no
ENSG00000088854	0.417	0.00013	0.00056	20	DNAAF9	3249306	3407669	dynein axonemal assembly factor 9 [Source:HGNC Symbol;Acc:HGNC:17721]	no
ENSG00000088876	0.022	0.845	0.884	20	ZNF343	2481817	2524702	zinc finger protein 343 [Source:HGNC Symbol;Acc:HGNC:16017]	no
ENSG00000088882	0.061	0.595	0.68	20	CPXM1	2794074	2800627	carboxypeptidase X, M14 family member 1 [Source:HGNC Symbol;Acc:HGNC:15771]	no
ENSG00000212807	0.724	5e-14	4.1e-12	7	OR2A42	144228244	144239605	olfactory receptor family 2 subfamily A member 42 [Source:HGNC Symbol;Acc:HGNC:31230]	no
ENSG00000088899	-0.041	0.72	0.785	20	LZTS3	3162617	3173549	leucine zipper tumor suppressor family member 3 [Source:HGNC Symbol;Acc:HGNC:30139]	no
ENSG00000088930	-0.228	0.044	0.08	20	XRN2	21303331	21389825	5'-3' exoribonuclease 2 [Source:HGNC Symbol;Acc:HGNC:12836]	no
ENSG00000088970	0.421	0.00011	0.00048	20	KIZ	21125983	21246622	kizuna centrosomal protein [Source:HGNC Symbol;Acc:HGNC:15865]	no
ENSG00000088986	-0.319	0.004	0.011	12	DYNLL1	120469850	120498493	dynein light chain LC8-type 1 [Source:HGNC Symbol;Acc:HGNC:15476]	no
ENSG00000088992	-0.25	0.026	0.052	12	TESC	117038923	117099479	tescalcin [Source:HGNC Symbol;Acc:HGNC:26065]	no
ENSG00000089006	0.164	0.148	0.223	20	SNX5	17941597	17968980	sorting nexin 5 [Source:HGNC Symbol;Acc:HGNC:14969]	no
ENSG00000089009	-0.361	0.001	0.003	12	RPL6	112405189	112418838	ribosomal protein L6 [Source:HGNC Symbol;Acc:HGNC:10362]	no
ENSG00000089022	-0.59	1e-08	1.6e-07	12	MAPKAPK5	111842228	111902222	MAPK activated protein kinase 5 [Source:HGNC Symbol;Acc:HGNC:6889]	no
ENSG00000089048	-0.52	8.9e-07	7.5e-06	20	ESF1	13714322	13784919	ESF1 nucleolar pre-rRNA processing protein homolog [Source:HGNC Symbol;Acc:HGNC:15898]	no
ENSG00000089050	-0.418	0.00013	0.00055	20	RBBP9	18486540	18497225	RB binding protein 9, serine hydrolase [Source:HGNC Symbol;Acc:HGNC:9892]	no
ENSG00000089053	0.209	0.064	0.111	12	ANAPC5	121308245	121399896	anaphase promoting complex subunit 5 [Source:HGNC Symbol;Acc:HGNC:15713]	no
ENSG00000089057	0.257	0.022	0.045	20	SLC23A2	4852356	5010293	solute carrier family 23 member 2 [Source:HGNC Symbol;Acc:HGNC:10973]	no
ENSG00000089060	0.291	0.009	0.022	12	SLC8B1	113298759	113359493	solute carrier family 8 member B1 [Source:HGNC Symbol;Acc:HGNC:26175]	no
ENSG00000089063	-0.408	0.00019	0.00076	20	TMEM230	5068232	5113103	transmembrane protein 230 [Source:HGNC Symbol;Acc:HGNC:15876]	no
ENSG00000089091	0.159	0.162	0.24	20	DZANK1	18383367	18467281	double zinc ribbon and ankyrin repeat domains 1 [Source:HGNC Symbol;Acc:HGNC:15858]	no
ENSG00000089094	-0.358	0.001	0.004	12	KDM2B	121429096	121581023	lysine demethylase 2B [Source:HGNC Symbol;Acc:HGNC:13610]	no
ENSG00000089123	-0.527	6.2e-07	5.5e-06	20	TASP1	13389392	13638932	taspase 1 [Source:HGNC Symbol;Acc:HGNC:15859]	no
ENSG00000089154	0.361	0.001	0.003	12	GCN1	120127202	120194715	GCN1 activator of EIF2AK4 [Source:HGNC Symbol;Acc:HGNC:4199]	no
ENSG00000089157	-0.004	0.972	0.978	12	RPLP0	120196699	120201235	ribosomal protein lateral stalk subunit P0 [Source:HGNC Symbol;Acc:HGNC:10371]	no
ENSG00000089159	0.295	0.008	0.02	12	PXN	120210439	120265771	paxillin [Source:HGNC Symbol;Acc:HGNC:9718]	no
ENSG00000087266	0.723	5.2e-14	4.3e-12	4	SH3BP2	2793071	2841098	SH3 domain binding protein 2 [Source:HGNC Symbol;Acc:HGNC:10825]	no
ENSG00000089177	-0.645	1.4e-10	4e-09	20	KIF16B	16272104	16573448	kinesin family member 16B [Source:HGNC Symbol;Acc:HGNC:15869]	no
ENSG00000089195	0.1	0.38	0.48	20	TRMT6	5937228	5950558	tRNA methyltransferase 6 non-catalytic subunit [Source:HGNC Symbol;Acc:HGNC:20900]	no
ENSG00000089199	0.349	0.002	0.005	20	CHGB	5911510	5925353	chromogranin B [Source:HGNC Symbol;Acc:HGNC:1930]	no
ENSG00000089220	-0.305	0.006	0.015	12	PEBP1	118136124	118145584	phosphatidylethanolamine binding protein 1 [Source:HGNC Symbol;Acc:HGNC:8630]	no
ENSG00000089234	-0.563	6.8e-08	8.3e-07	12	BRAP	111642146	111685956	BRCA1 associated protein [Source:HGNC Symbol;Acc:HGNC:1099]	no
ENSG00000089248	0.292	0.009	0.021	12	ERP29	112013348	112023449	endoplasmic reticulum protein 29 [Source:HGNC Symbol;Acc:HGNC:13799]	no
ENSG00000089250	0.11	0.333	0.433	12	NOS1	117208142	117452170	nitric oxide synthase 1 [Source:HGNC Symbol;Acc:HGNC:7872]	no
ENSG00000089280	0.097	0.397	0.497	16	FUS	31180138	31191605	FUS RNA binding protein [Source:HGNC Symbol;Acc:HGNC:4010]	no
ENSG00000089289	-0.492	4.1e-06	2.8e-05	X	IGBP1	70133447	70166324	immunoglobulin binding protein 1 [Source:HGNC Symbol;Acc:HGNC:5461]	no
ENSG00000089327	0.122	0.283	0.379	19	FXYD5	35154730	35169881	FXYD domain containing ion transport regulator 5 [Source:HGNC Symbol;Acc:HGNC:4029]	no
ENSG00000089335	0.057	0.616	0.698	19	ZNF302	34677639	34686397	zinc finger protein 302 [Source:HGNC Symbol;Acc:HGNC:13848]	no
ENSG00000089351	0.373	0.0007	0.002	19	GRAMD1A	34994784	35026471	GRAM domain containing 1A [Source:HGNC Symbol;Acc:HGNC:29305]	no
ENSG00000089472	-0.446	3.7e-05	0.00019	X	HEPH	66162671	66268867	hephaestin [Source:HGNC Symbol;Acc:HGNC:4866]	no
ENSG00000089486	-0.261	0.02	0.042	16	CDIP1	4510669	4538828	cell death inducing p53 target 1 [Source:HGNC Symbol;Acc:HGNC:13234]	no
ENSG00000089597	-0.284	0.011	0.026	11	GANAB	62624826	62646726	glucosidase II alpha subunit [Source:HGNC Symbol;Acc:HGNC:4138]	no
ENSG00000089639	-0.002	0.985	0.988	19	GMIP	19629476	19643657	GEM interacting protein [Source:HGNC Symbol;Acc:HGNC:24852]	no
ENSG00000089682	0.499	2.9e-06	2.1e-05	X	RBM41	107061885	107118823	RNA binding motif protein 41 [Source:HGNC Symbol;Acc:HGNC:25617]	no
ENSG00000089685	0.048	0.677	0.749	17	BIRC5	78214186	78225636	baculoviral IAP repeat containing 5 [Source:HGNC Symbol;Acc:HGNC:593]	no
ENSG00000089692	-0.151	0.183	0.265	12	LAG3	6772512	6778455	lymphocyte activating 3 [Source:HGNC Symbol;Acc:HGNC:6476]	no
ENSG00000089693	0.245	0.03	0.058	12	MLF2	6747996	6767475	myeloid leukemia factor 2 [Source:HGNC Symbol;Acc:HGNC:7126]	no
ENSG00000089723	-0.303	0.007	0.016	14	OTUB2	94026340	94048930	OTU deubiquitinase, ubiquitin aldehyde binding 2 [Source:HGNC Symbol;Acc:HGNC:20351]	no
ENSG00000089737	0.043	0.706	0.773	14	DDX24	94048287	94081202	DEAD-box helicase 24 [Source:HGNC Symbol;Acc:HGNC:13266]	no
ENSG00000089775	0.108	0.343	0.443	14	ZBTB25	64449106	64505213	zinc finger and BTB domain containing 25 [Source:HGNC Symbol;Acc:HGNC:13112]	no
ENSG00000089818	0.065	0.571	0.659	12	NECAP1	8076939	8097881	NECAP endocytosis associated 1 [Source:HGNC Symbol;Acc:HGNC:24539]	no
ENSG00000089820	0.177	0.119	0.187	X	ARHGAP4	153907367	153934999	Rho GTPase activating protein 4 [Source:HGNC Symbol;Acc:HGNC:674]	no
ENSG00000089847	0.103	0.368	0.469	19	ANKRD24	4182689	4224814	ankyrin repeat domain 24 [Source:HGNC Symbol;Acc:HGNC:29424]	no
ENSG00000089876	0.047	0.68	0.752	10	DHX32	125836337	125896436	DEAH-box helicase 32 (putative) [Source:HGNC Symbol;Acc:HGNC:16717]	no
ENSG00000089902	-0.602	4.4e-09	7.8e-08	14	RCOR1	102592649	102730561	REST corepressor 1 [Source:HGNC Symbol;Acc:HGNC:17441]	no
ENSG00000089916	0.188	0.097	0.157	14	GPATCH2L	76151916	76254342	G-patch domain containing 2 like [Source:HGNC Symbol;Acc:HGNC:20210]	no
ENSG00000090006	0.213	0.059	0.104	19	LTBP4	40592883	40629818	latent transforming growth factor beta binding protein 4 [Source:HGNC Symbol;Acc:HGNC:6717]	no
ENSG00000090013	-0.402	0.00024	0.00094	19	BLVRB	40447765	40465764	biliverdin reductase B [Source:HGNC Symbol;Acc:HGNC:1063]	no
ENSG00000090020	0.091	0.427	0.525	1	SLC9A1	27098809	27166981	solute carrier family 9 member A1 [Source:HGNC Symbol;Acc:HGNC:11071]	no
ENSG00000090054	-0.106	0.351	0.451	9	SPTLC1	92000087	92115413	serine palmitoyltransferase long chain base subunit 1 [Source:HGNC Symbol;Acc:HGNC:11277]	no
ENSG00000090060	-0.025	0.828	0.87	14	PAPOLA	96501433	96567116	poly(A) polymerase alpha [Source:HGNC Symbol;Acc:HGNC:14981]	no
ENSG00000090061	0.398	0.00028	0.001	14	CCNK	99481169	99535044	cyclin K [Source:HGNC Symbol;Acc:HGNC:1596]	no
ENSG00000090097	-0.066	0.562	0.652	3	PCBP4	51957454	51974016	poly(rC) binding protein 4 [Source:HGNC Symbol;Acc:HGNC:8652]	no
ENSG00000090238	0.274	0.014	0.031	16	YPEL3	30092314	30096915	yippee like 3 [Source:HGNC Symbol;Acc:HGNC:18327]	no
ENSG00000090263	0.169	0.136	0.208	7	MRPS33	141002610	141015228	mitochondrial ribosomal protein S33 [Source:HGNC Symbol;Acc:HGNC:16634]	no
ENSG00000090266	0.125	0.274	0.37	7	NDUFB2	140690777	140722790	NADH:ubiquinone oxidoreductase subunit B2 [Source:HGNC Symbol;Acc:HGNC:7697]	no
ENSG00000090273	0.247	0.028	0.055	1	NUDC	26900238	26946871	nuclear distribution C, dynein complex regulator [Source:HGNC Symbol;Acc:HGNC:8045]	no
ENSG00000090316	-0.143	0.207	0.295	4	MAEA	1289887	1340147	macrophage erythroblast attacher, E3 ubiquitin ligase [Source:HGNC Symbol;Acc:HGNC:13731]	no
ENSG00000090339	-0.045	0.693	0.763	19	ICAM1	10271093	10286615	intercellular adhesion molecule 1 [Source:HGNC Symbol;Acc:HGNC:5344]	no
ENSG00000090372	0.089	0.437	0.535	19	STRN4	46719511	46746994	striatin 4 [Source:HGNC Symbol;Acc:HGNC:15721]	no
ENSG00000090432	-0.177	0.118	0.185	1	MUL1	20499448	20508151	mitochondrial E3 ubiquitin protein ligase 1 [Source:HGNC Symbol;Acc:HGNC:25762]	no
ENSG00000090447	-0.086	0.453	0.55	16	TFAP4	4257186	4273075	transcription factor AP-4 [Source:HGNC Symbol;Acc:HGNC:11745]	no
ENSG00000090470	-0.485	6e-06	3.9e-05	15	PDCD7	65117379	65133808	programmed cell death 7 [Source:HGNC Symbol;Acc:HGNC:8767]	no
ENSG00000090487	-0.095	0.405	0.505	15	SPG21	64963022	64990310	SPG21 abhydrolase domain containing, maspardin [Source:HGNC Symbol;Acc:HGNC:20373]	no
ENSG00000090520	-0.376	0.00064	0.002	3	DNAJB11	186567403	186585800	DnaJ heat shock protein family (Hsp40) member B11 [Source:HGNC Symbol;Acc:HGNC:14889]	no
ENSG00000090530	-0.28	0.012	0.027	3	P3H2	189956728	190122437	prolyl 3-hydroxylase 2 [Source:HGNC Symbol;Acc:HGNC:19317]	no
ENSG00000090565	0.279	0.013	0.028	16	RAB11FIP3	425649	523011	RAB11 family interacting protein 3 [Source:HGNC Symbol;Acc:HGNC:17224]	no
ENSG00000090581	-0.235	0.037	0.07	16	GNPTG	1351931	1365737	N-acetylglucosamine-1-phosphate transferase subunit gamma [Source:HGNC Symbol;Acc:HGNC:23026]	no
ENSG00000090612	-0.389	0.0004	0.001	12	ZNF268	133181409	133214832	zinc finger protein 268 [Source:HGNC Symbol;Acc:HGNC:13061]	no
ENSG00000090615	0.353	0.001	0.004	12	GOLGA3	132768902	132829143	golgin A3 [Source:HGNC Symbol;Acc:HGNC:4426]	no
ENSG00000090621	-0.034	0.769	0.825	1	PABPC4	39560709	39576790	poly(A) binding protein cytoplasmic 4 [Source:HGNC Symbol;Acc:HGNC:8557]	no
ENSG00000090661	-0.24	0.033	0.063	19	CERS4	8206736	8262421	ceramide synthase 4 [Source:HGNC Symbol;Acc:HGNC:23747]	no
ENSG00000090674	-0.024	0.836	0.877	19	MCOLN1	7522624	7534009	mucolipin TRP cation channel 1 [Source:HGNC Symbol;Acc:HGNC:13356]	no
ENSG00000090686	-0.207	0.068	0.116	1	USP48	21678298	21783606	ubiquitin specific peptidase 48 [Source:HGNC Symbol;Acc:HGNC:18533]	no
ENSG00000090776	-0.059	0.606	0.69	X	EFNB1	68829021	68842160	ephrin B1 [Source:HGNC Symbol;Acc:HGNC:3226]	no
ENSG00000090857	-0.352	0.001	0.004	16	PDPR	70114332	70162537	pyruvate dehydrogenase phosphatase regulatory subunit [Source:HGNC Symbol;Acc:HGNC:30264]	no
ENSG00000090861	0.102	0.371	0.472	16	AARS1	70251983	70289707	alanyl-tRNA synthetase 1 [Source:HGNC Symbol;Acc:HGNC:20]	no
ENSG00000090863	-0.094	0.41	0.51	16	GLG1	74447427	74607144	golgi glycoprotein 1 [Source:HGNC Symbol;Acc:HGNC:4316]	no
ENSG00000090889	-0.643	1.7e-10	4.6e-09	X	KIF4A	70290104	70420886	kinesin family member 4A [Source:HGNC Symbol;Acc:HGNC:13339]	no
ENSG00000090905	0.242	0.032	0.061	16	TNRC6A	24610209	24827632	trinucleotide repeat containing adaptor 6A [Source:HGNC Symbol;Acc:HGNC:11969]	no
ENSG00000090924	-0.062	0.589	0.675	19	PLEKHG2	39412669	39428415	pleckstrin homology and RhoGEF domain containing G2 [Source:HGNC Symbol;Acc:HGNC:29515]	no
ENSG00000090932	-0.116	0.307	0.405	19	DLL3	39498895	39508481	delta like canonical Notch ligand 3 [Source:HGNC Symbol;Acc:HGNC:2909]	no
ENSG00000090971	0.436	6e-05	0.00028	19	NAT14	55485188	55487568	N-acetyltransferase 14 (putative) [Source:HGNC Symbol;Acc:HGNC:28918]	no
ENSG00000090975	0.325	0.004	0.009	12	PITPNM2	122983480	123151090	phosphatidylinositol transfer protein membrane associated 2 [Source:HGNC Symbol;Acc:HGNC:21044]	no
ENSG00000090989	0.375	0.00066	0.002	4	EXOC1	55853648	55905086	exocyst complex component 1 [Source:HGNC Symbol;Acc:HGNC:30380]	no
ENSG00000091009	-0.498	3.1e-06	2.2e-05	5	RBM27	146203605	146289223	RNA binding motif protein 27 [Source:HGNC Symbol;Acc:HGNC:29243]	no
ENSG00000091039	-0.417	0.00013	0.00056	12	OSBPL8	76351797	76559809	oxysterol binding protein like 8 [Source:HGNC Symbol;Acc:HGNC:16396]	no
ENSG00000091073	0.25	0.026	0.052	7	DTX2	76461676	76505995	deltex E3 ubiquitin ligase 2 [Source:HGNC Symbol;Acc:HGNC:15973]	no
ENSG00000091127	-0.086	0.452	0.549	7	PUS7	105439661	105522271	pseudouridine synthase 7 [Source:HGNC Symbol;Acc:HGNC:26033]	no
ENSG00000091129	0.102	0.373	0.474	7	NRCAM	108147623	108456717	neuronal cell adhesion molecule [Source:HGNC Symbol;Acc:HGNC:7994]	no
ENSG00000091136	-0.55	1.5e-07	1.7e-06	7	LAMB1	107923799	108003213	laminin subunit beta 1 [Source:HGNC Symbol;Acc:HGNC:6486]	no
ENSG00000091140	-0.637	2.7e-10	7.1e-09	7	DLD	107891162	107931730	dihydrolipoamide dehydrogenase [Source:HGNC Symbol;Acc:HGNC:2898]	no
ENSG00000091157	-0.703	5.2e-13	3.1e-11	18	WDR7	56651343	57029811	WD repeat domain 7 [Source:HGNC Symbol;Acc:HGNC:13490]	no
ENSG00000091164	-0.4	0.00026	0.00099	18	TXNL1	56597209	56651600	thioredoxin like 1 [Source:HGNC Symbol;Acc:HGNC:12436]	no
ENSG00000091317	-0.292	0.009	0.021	3	CMTM6	32481312	32502852	CKLF like MARVEL transmembrane domain containing 6 [Source:HGNC Symbol;Acc:HGNC:19177]	no
ENSG00000091409	-0.419	0.00012	0.00051	2	ITGA6	172427354	172506459	integrin subunit alpha 6 [Source:HGNC Symbol;Acc:HGNC:6142]	no
ENSG00000091428	0.206	0.068	0.117	2	RAPGEF4	172735274	173052893	Rap guanine nucleotide exchange factor 4 [Source:HGNC Symbol;Acc:HGNC:16626]	no
ENSG00000091436	-0.163	0.152	0.228	2	MAP3K20	173075435	173268015	mitogen-activated protein kinase kinase kinase 20 [Source:HGNC Symbol;Acc:HGNC:17797]	no
ENSG00000091483	-0.016	0.886	0.915	1	FH	241497511	241519799	fumarate hydratase [Source:HGNC Symbol;Acc:HGNC:3700]	no
ENSG00000091490	-0.09	0.43	0.528	4	SEL1L3	25747433	25863760	SEL1L family member 3 [Source:HGNC Symbol;Acc:HGNC:29108]	no
ENSG00000091527	-0.39	0.00038	0.001	3	CDV3	133573686	133590261	CDV3 homolog [Source:HGNC Symbol;Acc:HGNC:26928]	no
ENSG00000091536	0.13	0.253	0.347	17	MYO15A	18108756	18179802	myosin XVA [Source:HGNC Symbol;Acc:HGNC:7594]	no
ENSG00000091542	-0.062	0.585	0.672	17	ALKBH5	18183078	18209954	alkB homolog 5, RNA demethylase [Source:HGNC Symbol;Acc:HGNC:25996]	no
ENSG00000091592	0.031	0.788	0.84	17	NLRP1	5499415	5619424	NLR family pyrin domain containing 1 [Source:HGNC Symbol;Acc:HGNC:14374]	no
ENSG00000091622	0.232	0.04	0.074	17	PITPNM3	6451263	6556555	PITPNM family member 3 [Source:HGNC Symbol;Acc:HGNC:21043]	no
ENSG00000091640	0.315	0.005	0.012	17	SPAG7	4959226	4967817	sperm associated antigen 7 [Source:HGNC Symbol;Acc:HGNC:11216]	no
ENSG00000091651	0.329	0.003	0.008	16	ORC6	46689643	46698394	origin recognition complex subunit 6 [Source:HGNC Symbol;Acc:HGNC:17151]	no
ENSG00000241336	0.723	5.4e-14	4.4e-12	3	LINC01487	155240919	155258766	long intergenic non-protein coding RNA 1487 [Source:HGNC Symbol;Acc:HGNC:51139]	no
ENSG00000091732	-0.353	0.001	0.004	7	ZC3HC1	130018287	130051451	zinc finger C3HC-type containing 1 [Source:HGNC Symbol;Acc:HGNC:29913]	no
ENSG00000091844	-0.146	0.2	0.286	6	RGS17	153004459	153131282	regulator of G protein signaling 17 [Source:HGNC Symbol;Acc:HGNC:14088]	no
ENSG00000091947	0.083	0.467	0.563	17	TMEM101	44011188	44023946	transmembrane protein 101 [Source:HGNC Symbol;Acc:HGNC:28653]	no
ENSG00000091972	-0.124	0.278	0.374	3	CD200	112332347	112362812	CD200 molecule [Source:HGNC Symbol;Acc:HGNC:7203]	no
ENSG00000091986	-0.029	0.798	0.848	3	CCDC80	112596797	112649530	coiled-coil domain containing 80 [Source:HGNC Symbol;Acc:HGNC:30649]	no
ENSG00000092010	-0.77	1.1e-16	1.7e-14	14	PSME1	24136163	24138967	proteasome activator subunit 1 [Source:HGNC Symbol;Acc:HGNC:9568]	no
ENSG00000092020	-0.501	2.6e-06	1.9e-05	14	PPP2R3C	35085467	35122517	protein phosphatase 2 regulatory subunit B''gamma [Source:HGNC Symbol;Acc:HGNC:17485]	no
ENSG00000092036	0.352	0.001	0.004	14	HAUS4	22946228	22957161	HAUS augmin like complex subunit 4 [Source:HGNC Symbol;Acc:HGNC:20163]	no
ENSG00000092051	-0.121	0.287	0.384	14	JPH4	23568038	23578790	junctophilin 4 [Source:HGNC Symbol;Acc:HGNC:20156]	no
ENSG00000092068	-0.306	0.006	0.015	14	SLC7A8	23125295	23183674	solute carrier family 7 member 8 [Source:HGNC Symbol;Acc:HGNC:11066]	no
ENSG00000092094	-0.031	0.788	0.84	14	OSGEP	20446401	20455089	O-sialoglycoprotein endopeptidase [Source:HGNC Symbol;Acc:HGNC:18028]	no
ENSG00000092096	0.026	0.82	0.864	14	SLC22A17	23346314	23352912	solute carrier family 22 member 17 [Source:HGNC Symbol;Acc:HGNC:23095]	no
ENSG00000092108	-0.577	2.6e-08	3.7e-07	14	SCFD1	30622291	30737694	sec1 family domain containing 1 [Source:HGNC Symbol;Acc:HGNC:20726]	no
ENSG00000092140	-0.304	0.007	0.016	14	G2E3	30559158	30620064	G2/M-phase specific E3 ubiquitin protein ligase [Source:HGNC Symbol;Acc:HGNC:20338]	no
ENSG00000092148	-0.196	0.083	0.137	14	HECTD1	31100117	31207804	HECT domain E3 ubiquitin protein ligase 1 [Source:HGNC Symbol;Acc:HGNC:20157]	no
ENSG00000092199	-0.546	2e-07	2.1e-06	14	HNRNPC	21209136	21269494	heterogeneous nuclear ribonucleoprotein C [Source:HGNC Symbol;Acc:HGNC:5035]	no
ENSG00000092201	-0.346	0.002	0.005	14	SUPT16H	21351476	21384019	SPT16 homolog, facilitates chromatin remodeling subunit [Source:HGNC Symbol;Acc:HGNC:11465]	no
ENSG00000092203	-0.212	0.061	0.106	14	TOX4	21476597	21499175	TOX high mobility group box family member 4 [Source:HGNC Symbol;Acc:HGNC:20161]	no
ENSG00000092208	-0.703	5.1e-13	3.1e-11	14	GEMIN2	39114285	39136973	gem nuclear organelle associated protein 2 [Source:HGNC Symbol;Acc:HGNC:10884]	no
ENSG00000092330	-0.468	1.4e-05	7.8e-05	14	TINF2	24238286	24242663	TERF1 interacting nuclear factor 2 [Source:HGNC Symbol;Acc:HGNC:11824]	no
ENSG00000092345	-0.007	0.95	0.963	3	DAZL	16586792	16670306	deleted in azoospermia like [Source:HGNC Symbol;Acc:HGNC:2685]	no
ENSG00000092377	0.912	1.3e-31	1.5e-28	Y	TBL1Y	6910686	7101970	transducin beta like 1 Y-linked [Source:HGNC Symbol;Acc:HGNC:18502]	no
ENSG00000092421	-0.59	1e-08	1.7e-07	5	SEMA6A	116443555	116574823	semaphorin 6A [Source:HGNC Symbol;Acc:HGNC:10738]	no
ENSG00000092439	-0.269	0.016	0.035	15	TRPM7	50552473	50686797	transient receptor potential cation channel subfamily M member 7 [Source:HGNC Symbol;Acc:HGNC:17994]	no
ENSG00000092445	0.224	0.047	0.086	15	TYRO3	41557675	41583589	TYRO3 protein tyrosine kinase [Source:HGNC Symbol;Acc:HGNC:12446]	no
ENSG00000092470	-0.022	0.849	0.886	15	WDR76	43826980	43868412	WD repeat domain 76 [Source:HGNC Symbol;Acc:HGNC:25773]	no
ENSG00000092531	-0.206	0.068	0.117	15	SNAP23	42491233	42545356	synaptosome associated protein 23 [Source:HGNC Symbol;Acc:HGNC:11131]	no
ENSG00000092621	0.458	2.2e-05	0.00012	1	PHGDH	119648411	119744218	phosphoglycerate dehydrogenase [Source:HGNC Symbol;Acc:HGNC:8923]	no
ENSG00000092758	0.21	0.063	0.109	20	COL9A3	62816244	62841159	collagen type IX alpha 3 chain [Source:HGNC Symbol;Acc:HGNC:2219]	no
ENSG00000092820	-0.326	0.003	0.009	6	EZR	158765741	158819368	ezrin [Source:HGNC Symbol;Acc:HGNC:12691]	no
ENSG00000092841	0.126	0.267	0.362	12	MYL6	56158346	56163496	myosin light chain 6 [Source:HGNC Symbol;Acc:HGNC:7587]	no
ENSG00000092847	-0.176	0.122	0.19	1	AGO1	35869808	35930532	argonaute RISC component 1 [Source:HGNC Symbol;Acc:HGNC:3262]	no
ENSG00000092853	0.113	0.322	0.422	1	CLSPN	35720218	35769978	claspin [Source:HGNC Symbol;Acc:HGNC:19715]	no
ENSG00000092871	-0.24	0.033	0.063	17	RFFL	35005990	35089319	ring finger and FYVE like domain containing E3 ubiquitin protein ligase [Source:HGNC Symbol;Acc:HGNC:24821]	no
ENSG00000092929	0.355	0.001	0.004	17	UNC13D	75827225	75844785	unc-13 homolog D [Source:HGNC Symbol;Acc:HGNC:23147]	no
ENSG00000092931	-0.555	1.1e-07	1.3e-06	17	MFSD11	76735865	76781449	major facilitator superfamily domain containing 11 [Source:HGNC Symbol;Acc:HGNC:25458]	no
ENSG00000092964	-0.226	0.045	0.082	8	DPYSL2	26514031	26658178	dihydropyrimidinase like 2 [Source:HGNC Symbol;Acc:HGNC:3014]	no
ENSG00000092969	-0.318	0.004	0.011	1	TGFB2	218345336	218444619	transforming growth factor beta 2 [Source:HGNC Symbol;Acc:HGNC:11768]	no
ENSG00000092978	-0.526	6.5e-07	5.8e-06	1	GPATCH2	217426992	217631090	G-patch domain containing 2 [Source:HGNC Symbol;Acc:HGNC:25499]	no
ENSG00000093000	-0.189	0.096	0.155	22	NUP50	45163925	45188017	nucleoporin 50 [Source:HGNC Symbol;Acc:HGNC:8065]	no
ENSG00000093009	0.303	0.007	0.016	22	CDC45	19479457	19520612	cell division cycle 45 [Source:HGNC Symbol;Acc:HGNC:1739]	no
ENSG00000093010	0.268	0.017	0.036	22	COMT	19941371	19969975	catechol-O-methyltransferase [Source:HGNC Symbol;Acc:HGNC:2228]	no
ENSG00000093072	-0.808	2.4e-19	7.3e-17	22	ADA2	17178790	17258235	adenosine deaminase 2 [Source:HGNC Symbol;Acc:HGNC:1839]	no
ENSG00000093144	-0.219	0.053	0.094	6	ECHDC1	127288712	127343609	ethylmalonyl-CoA decarboxylase 1 [Source:HGNC Symbol;Acc:HGNC:21489]	no
ENSG00000093167	-0.266	0.018	0.038	3	LRRFIP2	37052626	37183689	LRR binding FLII interacting protein 2 [Source:HGNC Symbol;Acc:HGNC:6703]	no
ENSG00000093183	0.21	0.063	0.109	3	SEC22C	42547969	42601080	SEC22 homolog C, vesicle trafficking protein [Source:HGNC Symbol;Acc:HGNC:16828]	no
ENSG00000093217	-0.031	0.788	0.84	3	XYLB	38346760	38421348	xylulokinase [Source:HGNC Symbol;Acc:HGNC:12839]	no
ENSG00000094631	0.13	0.254	0.348	X	HDAC6	48801377	48824982	histone deacetylase 6 [Source:HGNC Symbol;Acc:HGNC:14064]	no
ENSG00000094755	-0.123	0.28	0.376	5	GABRP	170763350	170814047	gamma-aminobutyric acid type A receptor subunit pi [Source:HGNC Symbol;Acc:HGNC:4089]	no
ENSG00000094804	-0.251	0.025	0.051	17	CDC6	40287879	40304657	cell division cycle 6 [Source:HGNC Symbol;Acc:HGNC:1744]	no
ENSG00000094841	0.18	0.112	0.177	X	UPRT	75156388	75304885	uracil phosphoribosyltransferase homolog [Source:HGNC Symbol;Acc:HGNC:28334]	no
ENSG00000094880	-0.452	2.8e-05	0.00015	5	CDC23	138187650	138213343	cell division cycle 23 [Source:HGNC Symbol;Acc:HGNC:1724]	no
ENSG00000094914	-0.07	0.538	0.63	12	AAAS	53307456	53324864	aladin WD repeat nucleoporin [Source:HGNC Symbol;Acc:HGNC:13666]	no
ENSG00000094916	0.123	0.279	0.376	12	CBX5	54230942	54280133	chromobox 5 [Source:HGNC Symbol;Acc:HGNC:1555]	no
ENSG00000094975	-0.466	1.5e-05	8.7e-05	1	SUCO	172532349	172611833	SUN domain containing ossification factor [Source:HGNC Symbol;Acc:HGNC:1240]	no
ENSG00000095002	-0.527	6.1e-07	5.5e-06	2	MSH2	47403067	47663146	mutS homolog 2 [Source:HGNC Symbol;Acc:HGNC:7325]	no
ENSG00000095015	-0.449	3.3e-05	0.00017	5	MAP3K1	56815549	56896152	mitogen-activated protein kinase kinase kinase 1 [Source:HGNC Symbol;Acc:HGNC:6848]	no
ENSG00000095059	-0.098	0.39	0.491	19	DHPS	12675717	12681880	deoxyhypusine synthase [Source:HGNC Symbol;Acc:HGNC:2869]	no
ENSG00000095066	0.308	0.006	0.014	19	HOOK2	12763003	12872740	hook microtubule tethering protein 2 [Source:HGNC Symbol;Acc:HGNC:19885]	no
ENSG00000095139	-0.058	0.613	0.695	11	ARCN1	118572390	118603033	archain 1 [Source:HGNC Symbol;Acc:HGNC:649]	no
ENSG00000095203	-0.227	0.044	0.081	9	EPB41L4B	109171974	109321059	erythrocyte membrane protein band 4.1 like 4B [Source:HGNC Symbol;Acc:HGNC:19818]	no
ENSG00000095209	-0.491	4.4e-06	3e-05	9	TMEM38B	105694541	105776629	transmembrane protein 38B [Source:HGNC Symbol;Acc:HGNC:25535]	no
ENSG00000095261	-0.326	0.003	0.009	9	PSMD5	120815496	120842951	proteasome 26S subunit, non-ATPase 5 [Source:HGNC Symbol;Acc:HGNC:9563]	no
ENSG00000269713	0.723	5e-14	4.2e-12	1	NBPF9	149052186	149103561	NBPF member 9 [Source:HGNC Symbol;Acc:HGNC:31991]	no
ENSG00000095319	0.057	0.62	0.701	9	NUP188	128947699	129007096	nucleoporin 188 [Source:HGNC Symbol;Acc:HGNC:17859]	no
ENSG00000095321	0.179	0.114	0.18	9	CRAT	129094142	129111189	carnitine O-acetyltransferase [Source:HGNC Symbol;Acc:HGNC:2342]	no
ENSG00000095370	0.406	0.00021	0.00083	9	SH2D3C	127738317	127778710	SH2 domain containing 3C [Source:HGNC Symbol;Acc:HGNC:16884]	no
ENSG00000095380	-0.1	0.38	0.481	9	NANS	98056732	98083077	N-acetylneuraminate synthase [Source:HGNC Symbol;Acc:HGNC:19237]	no
ENSG00000095383	0.191	0.091	0.149	9	TBC1D2	98199011	98255649	TBC1 domain family member 2 [Source:HGNC Symbol;Acc:HGNC:18026]	no
ENSG00000095397	0.429	7.9e-05	0.00036	9	WHRN	114402080	114505473	whirlin [Source:HGNC Symbol;Acc:HGNC:16361]	no
ENSG00000095485	-0.591	9.6e-09	1.6e-07	10	CWF19L1	100232298	100267680	CWF19 like cell cycle control factor 1 [Source:HGNC Symbol;Acc:HGNC:25613]	no
ENSG00000095539	0.384	0.00047	0.002	10	SEMA4G	100969504	100985871	semaphorin 4G [Source:HGNC Symbol;Acc:HGNC:10735]	no
ENSG00000095564	-0.118	0.299	0.396	10	BTAF1	91923770	92031437	B-TFIID TATA-box binding protein associated factor 1 [Source:HGNC Symbol;Acc:HGNC:17307]	no
ENSG00000095574	-0.164	0.15	0.225	10	IKZF5	122990807	123008812	IKAROS family zinc finger 5 [Source:HGNC Symbol;Acc:HGNC:14283]	no
ENSG00000095587	-0.167	0.141	0.213	10	TLL2	96364608	96513926	tolloid like 2 [Source:HGNC Symbol;Acc:HGNC:11844]	no
ENSG00000095596	-0.058	0.609	0.692	10	CYP26A1	93073475	93077885	cytochrome P450 family 26 subfamily A member 1 [Source:HGNC Symbol;Acc:HGNC:2603]	no
ENSG00000095637	-0.098	0.391	0.492	10	SORBS1	95311771	95561414	sorbin and SH3 domain containing 1 [Source:HGNC Symbol;Acc:HGNC:14565]	no
ENSG00000095739	-0.308	0.006	0.014	10	BAMBI	28677510	28682932	BMP and activin membrane bound inhibitor [Source:HGNC Symbol;Acc:HGNC:30251]	no
ENSG00000095752	0.224	0.048	0.086	19	IL11	55364382	55370463	interleukin 11 [Source:HGNC Symbol;Acc:HGNC:5966]	no
ENSG00000095777	-0.644	1.6e-10	4.4e-09	10	MYO3A	25934229	26212532	myosin IIIA [Source:HGNC Symbol;Acc:HGNC:7601]	no
ENSG00000095787	-0.603	4e-09	7.2e-08	10	WAC	28532493	28623112	WW domain containing adaptor with coiled-coil [Source:HGNC Symbol;Acc:HGNC:17327]	no
ENSG00000095794	-0.529	5.3e-07	4.8e-06	10	CREM	35126791	35212958	cAMP responsive element modulator [Source:HGNC Symbol;Acc:HGNC:2352]	no
ENSG00000095906	0.287	0.01	0.023	16	NUBP2	1782932	1789186	NUBP iron-sulfur cluster assembly factor 2, cytosolic [Source:HGNC Symbol;Acc:HGNC:8042]	no
ENSG00000095932	-0.371	0.00077	0.003	19	SMIM24	3473986	3480525	small integral membrane protein 24 [Source:HGNC Symbol;Acc:HGNC:37244]	no
ENSG00000095951	-0.192	0.09	0.147	6	HIVEP1	12008762	12164999	HIVEP zinc finger 1 [Source:HGNC Symbol;Acc:HGNC:4920]	no
ENSG00000096060	-0.143	0.21	0.298	6	FKBP5	35573585	35728583	FKBP prolyl isomerase 5 [Source:HGNC Symbol;Acc:HGNC:3721]	no
ENSG00000096063	-0.359	0.001	0.004	6	SRPK1	35832966	35921342	SRSF protein kinase 1 [Source:HGNC Symbol;Acc:HGNC:11305]	no
ENSG00000096070	-0.591	1e-08	1.6e-07	6	BRPF3	36196744	36232790	bromodomain and PHD finger containing 3 [Source:HGNC Symbol;Acc:HGNC:14256]	no
ENSG00000096080	-0.628	5.9e-10	1.4e-08	6	MRPS18A	43671202	43687791	mitochondrial ribosomal protein S18A [Source:HGNC Symbol;Acc:HGNC:14515]	no
ENSG00000096092	-0.364	0.00098	0.003	6	TMEM14A	52671113	52686588	transmembrane protein 14A [Source:HGNC Symbol;Acc:HGNC:21076]	no
ENSG00000096093	-0.242	0.032	0.062	6	EFHC1	52362123	52529886	EF-hand domain containing 1 [Source:HGNC Symbol;Acc:HGNC:16406]	no
ENSG00000096384	-0.286	0.011	0.024	6	HSP90AB1	44246166	44253888	heat shock protein 90 alpha family class B member 1 [Source:HGNC Symbol;Acc:HGNC:5258]	no
ENSG00000096401	-0.462	1.8e-05	0.0001	6	CDC5L	44387706	44450425	cell division cycle 5 like [Source:HGNC Symbol;Acc:HGNC:1743]	no
ENSG00000123384	0.722	6.3e-14	5e-12	12	LRP1	57128483	57213361	LDL receptor related protein 1 [Source:HGNC Symbol;Acc:HGNC:6692]	no
ENSG00000096654	-0.049	0.668	0.742	6	ZNF184	27450743	27473118	zinc finger protein 184 [Source:HGNC Symbol;Acc:HGNC:12975]	no
ENSG00000096696	-0.173	0.127	0.196	6	DSP	7541617	7586714	desmoplakin [Source:HGNC Symbol;Acc:HGNC:3052]	no
ENSG00000096717	-0.682	4.4e-12	2e-10	10	SIRT1	67884656	67918390	sirtuin 1 [Source:HGNC Symbol;Acc:HGNC:14929]	no
ENSG00000096746	-0.228	0.044	0.08	10	HNRNPH3	68331174	68343193	heterogeneous nuclear ribonucleoprotein H3 [Source:HGNC Symbol;Acc:HGNC:5043]	no
ENSG00000096872	-0.272	0.015	0.033	9	IFT74	26947039	27066134	intraflagellar transport 74 [Source:HGNC Symbol;Acc:HGNC:21424]	no
ENSG00000096968	-0.177	0.119	0.186	9	JAK2	4984390	5129948	Janus kinase 2 [Source:HGNC Symbol;Acc:HGNC:6192]	no
ENSG00000097007	-0.184	0.104	0.166	9	ABL1	130713043	130887675	ABL proto-oncogene 1, non-receptor tyrosine kinase [Source:HGNC Symbol;Acc:HGNC:76]	no
ENSG00000097021	0.206	0.069	0.118	1	ACOT7	6264269	6393767	acyl-CoA thioesterase 7 [Source:HGNC Symbol;Acc:HGNC:24157]	no
ENSG00000097033	-0.174	0.126	0.195	1	SH3GLB1	86704570	86748184	SH3 domain containing GRB2 like, endophilin B1 [Source:HGNC Symbol;Acc:HGNC:10833]	no
ENSG00000097046	-0.356	0.001	0.004	1	CDC7	91500851	91525764	cell division cycle 7 [Source:HGNC Symbol;Acc:HGNC:1745]	no
ENSG00000097096	0.072	0.528	0.62	1	SYDE2	85156889	85201724	synapse defective Rho GTPase homolog 2 [Source:HGNC Symbol;Acc:HGNC:25841]	no
ENSG00000099139	-0.202	0.074	0.125	9	PCSK5	75890644	76362975	proprotein convertase subtilisin/kexin type 5 [Source:HGNC Symbol;Acc:HGNC:8747]	no
ENSG00000099194	0.135	0.235	0.327	10	SCD	100347233	100364826	stearoyl-CoA desaturase [Source:HGNC Symbol;Acc:HGNC:10571]	no
ENSG00000099203	-0.15	0.186	0.269	19	TMED1	10832067	10836318	transmembrane p24 trafficking protein 1 [Source:HGNC Symbol;Acc:HGNC:17291]	no
ENSG00000099204	-0.304	0.007	0.016	10	ABLIM1	114431112	114768061	actin binding LIM protein 1 [Source:HGNC Symbol;Acc:HGNC:78]	no
ENSG00000099219	-0.157	0.166	0.245	9	ERMP1	5749832	5879537	endoplasmic reticulum metallopeptidase 1 [Source:HGNC Symbol;Acc:HGNC:23703]	no
ENSG00000099246	-0.391	0.00036	0.001	10	RAB18	27504174	27543207	RAB18, member RAS oncogene family [Source:HGNC Symbol;Acc:HGNC:14244]	no
ENSG00000099251	-0.069	0.547	0.638	10	HSD17B7P2	38356455	38378107	hydroxysteroid 17-beta dehydrogenase 7 pseudogene 2 [Source:HGNC Symbol;Acc:HGNC:28120]	no
ENSG00000099256	-0.021	0.854	0.891	10	PRTFDC1	24848614	24952606	phosphoribosyl transferase domain containing 1 [Source:HGNC Symbol;Acc:HGNC:23333]	no
ENSG00000099282	-0.069	0.544	0.636	10	TSPAN15	69451465	69507666	tetraspanin 15 [Source:HGNC Symbol;Acc:HGNC:23298]	no
ENSG00000099284	-0.559	8.6e-08	1e-06	10	MACROH2A2	70052544	70112282	macroH2A.2 histone [Source:HGNC Symbol;Acc:HGNC:14453]	no
ENSG00000099290	-0.383	0.00049	0.002	10	WASHC2A	50067888	50133509	WASH complex subunit 2A [Source:HGNC Symbol;Acc:HGNC:23416]	no
ENSG00000099308	0.163	0.152	0.228	19	MAST3	18097778	18151692	microtubule associated serine/threonine kinase 3 [Source:HGNC Symbol;Acc:HGNC:19036]	no
ENSG00000099326	0.336	0.002	0.007	19	MZF1	58561931	58573575	myeloid zinc finger 1 [Source:HGNC Symbol;Acc:HGNC:13108]	no
ENSG00000099330	0.088	0.443	0.54	19	OCEL1	17226213	17229219	occludin/ELL domain containing 1 [Source:HGNC Symbol;Acc:HGNC:26221]	no
ENSG00000099331	-0.202	0.075	0.126	19	MYO9B	17075777	17214537	myosin IXB [Source:HGNC Symbol;Acc:HGNC:7609]	no
ENSG00000099337	0.445	4e-05	0.0002	19	KCNK6	38319845	38332076	potassium two pore domain channel subfamily K member 6 [Source:HGNC Symbol;Acc:HGNC:6281]	no
ENSG00000099338	-0.062	0.585	0.672	19	CATSPERG	38335775	38370943	cation channel sperm associated auxiliary subunit gamma [Source:HGNC Symbol;Acc:HGNC:25243]	no
ENSG00000099341	0.183	0.107	0.17	19	PSMD8	38374563	38383850	proteasome 26S subunit, non-ATPase 8 [Source:HGNC Symbol;Acc:HGNC:9566]	no
ENSG00000099364	-0.048	0.678	0.75	16	FBXL19	30923055	30948783	F-box and leucine rich repeat protein 19 [Source:HGNC Symbol;Acc:HGNC:25300]	no
ENSG00000099365	-0.118	0.3	0.398	16	STX1B	30989256	31010638	syntaxin 1B [Source:HGNC Symbol;Acc:HGNC:18539]	no
ENSG00000099377	-0.408	0.00019	0.00076	16	HSD3B7	30985207	30989147	hydroxy-delta-5-steroid dehydrogenase, 3 beta- and steroid delta-isomerase 7 [Source:HGNC Symbol;Acc:HGNC:18324]	no
ENSG00000099381	0.245	0.03	0.058	16	SETD1A	30957754	30984664	SET domain containing 1A, histone lysine methyltransferase [Source:HGNC Symbol;Acc:HGNC:29010]	no
ENSG00000099385	0.138	0.225	0.316	16	BCL7C	30833626	30894302	BAF chromatin remodeling complex subunit BCL7C [Source:HGNC Symbol;Acc:HGNC:1006]	no
ENSG00000099617	-0.081	0.476	0.572	19	EFNA2	1285873	1301431	ephrin A2 [Source:HGNC Symbol;Acc:HGNC:3222]	no
ENSG00000099622	0.081	0.479	0.575	19	CIRBP	1259384	1274880	cold inducible RNA binding protein [Source:HGNC Symbol;Acc:HGNC:1982]	no
ENSG00000099624	0.327	0.003	0.009	19	ATP5F1D	1241746	1244825	ATP synthase F1 subunit delta [Source:HGNC Symbol;Acc:HGNC:837]	no
ENSG00000099625	-0.13	0.255	0.349	19	CBARP	1228287	1238027	CACN subunit beta associated regulatory protein [Source:HGNC Symbol;Acc:HGNC:28617]	no
ENSG00000099715	0.808	2.4e-19	7.3e-17	Y	PCDH11Y	5000226	5742224	protocadherin 11 Y-linked [Source:HGNC Symbol;Acc:HGNC:15813]	no
ENSG00000099725	0.94	1e-37	1.5e-34	Y	PRKY	7273972	7381548	protein kinase Y-linked (pseudogene) [Source:HGNC Symbol;Acc:HGNC:9444]	no
ENSG00000099783	0.233	0.038	0.072	19	HNRNPM	8444767	8489114	heterogeneous nuclear ribonucleoprotein M [Source:HGNC Symbol;Acc:HGNC:5046]	no
ENSG00000099785	0.232	0.039	0.073	19	MARCHF2	8413270	8439017	membrane associated ring-CH-type finger 2 [Source:HGNC Symbol;Acc:HGNC:28038]	no
ENSG00000099795	0.27	0.016	0.034	19	NDUFB7	14566078	14572066	NADH:ubiquinone oxidoreductase subunit B7 [Source:HGNC Symbol;Acc:HGNC:7702]	no
ENSG00000099797	-0.032	0.782	0.835	19	TECR	14517085	14565980	trans-2,3-enoyl-CoA reductase [Source:HGNC Symbol;Acc:HGNC:4551]	no
ENSG00000099800	0.361	0.001	0.003	19	TIMM13	2425625	2427586	translocase of inner mitochondrial membrane 13 [Source:HGNC Symbol;Acc:HGNC:11816]	no
ENSG00000099804	0.041	0.718	0.784	19	CDC34	531760	542092	cell division cycle 34, ubiqiutin conjugating enzyme [Source:HGNC Symbol;Acc:HGNC:1734]	no
ENSG00000099810	-0.028	0.806	0.853	9	MTAP	21802636	21937651	methylthioadenosine phosphorylase [Source:HGNC Symbol;Acc:HGNC:7413]	no
ENSG00000099814	0.36	0.001	0.004	14	CEP170B	104865268	104896747	centrosomal protein 170B [Source:HGNC Symbol;Acc:HGNC:20362]	no
ENSG00000099817	0.291	0.009	0.022	19	POLR2E	1086574	1095380	RNA polymerase II, I and III subunit E [Source:HGNC Symbol;Acc:HGNC:9192]	no
ENSG00000099821	0.38	0.00056	0.002	19	POLRMT	617221	633537	RNA polymerase mitochondrial [Source:HGNC Symbol;Acc:HGNC:9200]	no
ENSG00000099822	0.24	0.033	0.064	19	HCN2	589881	617159	hyperpolarization activated cyclic nucleotide gated potassium and sodium channel 2 [Source:HGNC Symbol;Acc:HGNC:4846]	no
ENSG00000248367	0.722	6.3e-14	4.9e-12	5	ENSG00000248367	180292178	180295256	novel transcript	no
ENSG00000099849	-0.062	0.584	0.671	11	RASSF7	560404	564025	Ras association domain family member 7 [Source:HGNC Symbol;Acc:HGNC:1166]	no
ENSG00000099860	-0.04	0.724	0.788	19	GADD45B	2476122	2478259	growth arrest and DNA damage inducible beta [Source:HGNC Symbol;Acc:HGNC:4096]	no
ENSG00000099864	0.465	1.6e-05	8.8e-05	19	PALM	708935	748329	paralemmin [Source:HGNC Symbol;Acc:HGNC:8594]	no
ENSG00000099875	-0.056	0.623	0.704	19	MKNK2	2037465	2051244	MAPK interacting serine/threonine kinase 2 [Source:HGNC Symbol;Acc:HGNC:7111]	no
ENSG00000099889	0.422	0.00011	0.00046	22	ARVCF	19969896	20016823	ARVCF delta catenin family member [Source:HGNC Symbol;Acc:HGNC:728]	no
ENSG00000099899	0.238	0.035	0.066	22	TRMT2A	20111875	20117392	tRNA methyltransferase 2 homolog A [Source:HGNC Symbol;Acc:HGNC:24974]	no
ENSG00000099901	0.035	0.757	0.816	22	RANBP1	20115938	20127355	RAN binding protein 1 [Source:HGNC Symbol;Acc:HGNC:9847]	no
ENSG00000099904	0.051	0.658	0.733	22	ZDHHC8	20129456	20148007	zinc finger DHHC-type palmitoyltransferase 8 [Source:HGNC Symbol;Acc:HGNC:18474]	no
ENSG00000270605	0.722	6.1e-14	4.9e-12	1	ENSG00000270605	28239509	28241453	novel transcript	no
ENSG00000099917	0.215	0.058	0.101	22	MED15	20495913	20587632	mediator complex subunit 15 [Source:HGNC Symbol;Acc:HGNC:14248]	no
ENSG00000099940	0.075	0.509	0.603	22	SNAP29	20859007	20891214	synaptosome associated protein 29 [Source:HGNC Symbol;Acc:HGNC:11133]	no
ENSG00000099942	-0.091	0.427	0.526	22	CRKL	20917407	20953747	CRK like proto-oncogene, adaptor protein [Source:HGNC Symbol;Acc:HGNC:2363]	no
ENSG00000099949	-0.29	0.01	0.022	22	LZTR1	20982269	20999032	leucine zipper like transcription regulator 1 [Source:HGNC Symbol;Acc:HGNC:6742]	no
ENSG00000099953	0.166	0.143	0.216	22	MMP11	23768226	23784316	matrix metallopeptidase 11 [Source:HGNC Symbol;Acc:HGNC:7157]	no
ENSG00000099954	-0.067	0.555	0.646	22	CECR2	17359949	17558151	CECR2 histone acetyl-lysine reader [Source:HGNC Symbol;Acc:HGNC:1840]	no
ENSG00000099956	-0.014	0.905	0.929	22	SMARCB1	23786931	23838009	SWI/SNF related, matrix associated, actin dependent regulator of chromatin, subfamily b, member 1 [Source:HGNC Symbol;Acc:HGNC:11103]	no
ENSG00000099958	0.4	0.00026	0.00099	22	DERL3	23834503	23839128	derlin 3 [Source:HGNC Symbol;Acc:HGNC:14236]	no
ENSG00000099968	0.123	0.28	0.376	22	BCL2L13	17628855	17730855	BCL2 like 13 [Source:HGNC Symbol;Acc:HGNC:17164]	no
ENSG00000099991	0.389	0.0004	0.001	22	CABIN1	24011192	24178628	calcineurin binding protein 1 [Source:HGNC Symbol;Acc:HGNC:24187]	no
ENSG00000099992	0.46	2e-05	0.00011	22	TBC1D10A	30291990	30326947	TBC1 domain family member 10A [Source:HGNC Symbol;Acc:HGNC:23609]	no
ENSG00000099994	0.476	9.1e-06	5.6e-05	22	SUSD2	24181487	24189106	sushi domain containing 2 [Source:HGNC Symbol;Acc:HGNC:30667]	no
ENSG00000099995	0.165	0.145	0.219	22	SF3A1	30331988	30356919	splicing factor 3a subunit 1 [Source:HGNC Symbol;Acc:HGNC:10765]	no
ENSG00000099999	-0.03	0.794	0.845	22	RNF215	30368811	30421771	ring finger protein 215 [Source:HGNC Symbol;Acc:HGNC:33434]	no
ENSG00000100014	-0.396	0.00031	0.001	22	SPECC1L	24270817	24417739	sperm antigen with calponin homology and coiled-coil domains 1 like [Source:HGNC Symbol;Acc:HGNC:29022]	no
ENSG00000100023	0.302	0.007	0.017	22	PPIL2	21666000	21700015	peptidylprolyl isomerase like 2 [Source:HGNC Symbol;Acc:HGNC:9261]	no
ENSG00000100027	0.044	0.699	0.768	22	YPEL1	21697536	21735794	yippee like 1 [Source:HGNC Symbol;Acc:HGNC:12845]	no
ENSG00000100028	-0.394	0.00033	0.001	22	SNRPD3	24555958	24582052	small nuclear ribonucleoprotein D3 polypeptide [Source:HGNC Symbol;Acc:HGNC:11160]	no
ENSG00000100029	0.143	0.208	0.296	22	PES1	30576625	30607083	pescadillo ribosomal biogenesis factor 1 [Source:HGNC Symbol;Acc:HGNC:8848]	no
ENSG00000100030	-0.489	4.8e-06	3.2e-05	22	MAPK1	21759657	21867680	mitogen-activated protein kinase 1 [Source:HGNC Symbol;Acc:HGNC:6871]	no
ENSG00000100034	0.141	0.216	0.305	22	PPM1F	21919425	21952848	protein phosphatase, Mg2+/Mn2+ dependent 1F [Source:HGNC Symbol;Acc:HGNC:19388]	no
ENSG00000165272	0.721	7.1e-14	5.4e-12	9	AQP3	33441156	33447596	aquaporin 3 (Gill blood group) [Source:HGNC Symbol;Acc:HGNC:636]	no
ENSG00000100038	0.27	0.016	0.035	22	TOP3B	21957025	21982813	DNA topoisomerase III beta [Source:HGNC Symbol;Acc:HGNC:11993]	no
ENSG00000100056	0.242	0.031	0.061	22	ESS2	19130279	19144684	ess-2 splicing factor homolog [Source:HGNC Symbol;Acc:HGNC:16817]	no
ENSG00000100058	-0.161	0.156	0.232	22	CRYBB2P1	25455712	25459681	crystallin beta B2 pseudogene 1 [Source:HGNC Symbol;Acc:HGNC:2399]	no
ENSG00000100060	-0.134	0.238	0.33	22	MFNG	37469063	37486393	MFNG O-fucosylpeptide 3-beta-N-acetylglucosaminyltransferase [Source:HGNC Symbol;Acc:HGNC:7038]	no
ENSG00000185513	0.721	6.8e-14	5.3e-12	20	L3MBTL1	43489442	43550954	L3MBTL histone methyl-lysine binding protein 1 [Source:HGNC Symbol;Acc:HGNC:15905]	no
ENSG00000100068	-0.201	0.076	0.128	22	LRP5L	25351612	25405274	LDL receptor related protein 5 like (pseudogene) [Source:HGNC Symbol;Acc:HGNC:25323]	no
ENSG00000100075	-0.119	0.298	0.396	22	SLC25A1	19175581	19178739	solute carrier family 25 member 1 [Source:HGNC Symbol;Acc:HGNC:10979]	no
ENSG00000100077	0.327	0.003	0.009	22	GRK3	25564675	25729294	G protein-coupled receptor kinase 3 [Source:HGNC Symbol;Acc:HGNC:290]	no
ENSG00000100078	0.082	0.472	0.568	22	PLA2G3	31134807	31140508	phospholipase A2 group III [Source:HGNC Symbol;Acc:HGNC:17934]	no
ENSG00000100083	0.278	0.013	0.029	22	GGA1	37608725	37633564	golgi associated, gamma adaptin ear containing, ARF binding protein 1 [Source:HGNC Symbol;Acc:HGNC:17842]	no
ENSG00000100084	-0.044	0.703	0.771	22	HIRA	19330698	19447450	histone cell cycle regulator [Source:HGNC Symbol;Acc:HGNC:4916]	no
ENSG00000100092	0.477	8.6e-06	5.3e-05	22	SH3BP1	37634654	37656117	SH3 domain binding protein 1 [Source:HGNC Symbol;Acc:HGNC:10824]	no
ENSG00000100097	0.153	0.178	0.26	22	LGALS1	37675636	37679802	galectin 1 [Source:HGNC Symbol;Acc:HGNC:6561]	no
ENSG00000100099	0.403	0.00023	0.0009	22	HPS4	26443107	26483931	HPS4 biogenesis of lysosomal organelles complex 3 subunit 2 [Source:HGNC Symbol;Acc:HGNC:15844]	no
ENSG00000100100	-0.088	0.44	0.537	22	PIK3IP1	31281594	31292534	phosphoinositide-3-kinase interacting protein 1 [Source:HGNC Symbol;Acc:HGNC:24942]	no
ENSG00000100104	-0.559	8.5e-08	1e-06	22	SRRD	26483877	26494658	SRR1 domain containing [Source:HGNC Symbol;Acc:HGNC:33910]	no
ENSG00000100105	-0.495	3.5e-06	2.4e-05	22	PATZ1	31325804	31346346	POZ/BTB and AT hook containing zinc finger 1 [Source:HGNC Symbol;Acc:HGNC:13071]	no
ENSG00000100106	0.151	0.185	0.268	22	TRIOBP	37697048	37776556	TRIO and F-actin binding protein [Source:HGNC Symbol;Acc:HGNC:17009]	no
ENSG00000100109	-0.177	0.119	0.186	22	TFIP11	26491225	26512505	tuftelin interacting protein 11 [Source:HGNC Symbol;Acc:HGNC:17165]	no
ENSG00000100116	-0.017	0.882	0.912	22	GCAT	37807905	37817176	glycine C-acetyltransferase [Source:HGNC Symbol;Acc:HGNC:4188]	no
ENSG00000100124	0.409	0.00018	0.00074	22	ANKRD54	37830855	37849327	ankyrin repeat domain 54 [Source:HGNC Symbol;Acc:HGNC:25185]	no
ENSG00000100129	-0.561	7.6e-08	9.2e-07	22	EIF3L	37848868	37889407	eukaryotic translation initiation factor 3 subunit L [Source:HGNC Symbol;Acc:HGNC:18138]	no
ENSG00000100138	-0.523	7.5e-07	6.5e-06	22	SNU13	41673933	41690504	small nuclear ribonucleoprotein 13 [Source:HGNC Symbol;Acc:HGNC:7819]	no
ENSG00000100139	0.07	0.539	0.631	22	MICALL1	37905657	37942822	MICAL like 1 [Source:HGNC Symbol;Acc:HGNC:29804]	no
ENSG00000100142	0.257	0.022	0.045	22	POLR2F	37952607	38041915	RNA polymerase II, I and III subunit F [Source:HGNC Symbol;Acc:HGNC:9193]	no
ENSG00000100146	0.309	0.006	0.014	22	SOX10	37970686	37987422	SRY-box transcription factor 10 [Source:HGNC Symbol;Acc:HGNC:11190]	no
ENSG00000100147	-0.172	0.13	0.2	22	CCDC134	41800679	41832164	coiled-coil domain containing 134 [Source:HGNC Symbol;Acc:HGNC:26185]	no
ENSG00000100150	-0.267	0.018	0.037	22	DEPDC5	31753867	31908033	DEP domain containing 5, GATOR1 subcomplex subunit [Source:HGNC Symbol;Acc:HGNC:18423]	no
ENSG00000100151	0.054	0.636	0.715	22	PICK1	38056311	38075701	protein interacting with PRKCA 1 [Source:HGNC Symbol;Acc:HGNC:9394]	no
ENSG00000100154	-0.253	0.024	0.049	22	TTC28	27978014	28679840	tetratricopeptide repeat domain 28 [Source:HGNC Symbol;Acc:HGNC:29179]	no
ENSG00000100162	0.176	0.121	0.189	22	CENPM	41938737	41947152	centromere protein M [Source:HGNC Symbol;Acc:HGNC:18352]	no
ENSG00000100167	-0.507	1.8e-06	1.4e-05	22	SEPTIN3	41969443	41998221	septin 3 [Source:HGNC Symbol;Acc:HGNC:10750]	no
ENSG00000100196	-0.052	0.649	0.726	22	KDELR3	38468078	38483447	KDEL endoplasmic reticulum protein retention receptor 3 [Source:HGNC Symbol;Acc:HGNC:6306]	no
ENSG00000100201	-0.142	0.213	0.302	22	DDX17	38483438	38507660	DEAD-box helicase 17 [Source:HGNC Symbol;Acc:HGNC:2740]	no
ENSG00000100206	-0.242	0.031	0.061	22	DMC1	38518948	38570204	DNA meiotic recombinase 1 [Source:HGNC Symbol;Acc:HGNC:2927]	no
ENSG00000100207	0.114	0.315	0.413	22	TCF20	42160013	42343616	transcription factor 20 [Source:HGNC Symbol;Acc:HGNC:11631]	no
ENSG00000100209	-0.248	0.027	0.054	22	HSCB	28742039	28757515	HscB mitochondrial iron-sulfur cluster cochaperone [Source:HGNC Symbol;Acc:HGNC:28913]	no
ENSG00000100211	-0.187	0.099	0.159	22	CBY1	38656636	38673854	chibby family member 1, beta catenin antagonist [Source:HGNC Symbol;Acc:HGNC:1307]	no
ENSG00000100216	0.118	0.3	0.398	22	TOMM22	38681957	38685421	translocase of outer mitochondrial membrane 22 [Source:HGNC Symbol;Acc:HGNC:18002]	no
ENSG00000100219	-0.275	0.014	0.031	22	XBP1	28794555	28800597	X-box binding protein 1 [Source:HGNC Symbol;Acc:HGNC:12801]	no
ENSG00000100220	-0.497	3.1e-06	2.2e-05	22	RTCB	32387582	32412248	RNA 2',3'-cyclic phosphate and 5'-OH ligase [Source:HGNC Symbol;Acc:HGNC:26935]	no
ENSG00000244627	0.721	7e-14	5.4e-12	22	TPTEP2	38361381	38384096	TPTE pseudogene 2 [Source:HGNC Symbol;Acc:HGNC:53828]	no
ENSG00000100225	-0.514	1.3e-06	1e-05	22	FBXO7	32474676	32498829	F-box protein 7 [Source:HGNC Symbol;Acc:HGNC:13586]	no
ENSG00000100226	0.032	0.779	0.833	22	GTPBP1	38705742	38738299	GTP binding protein 1 [Source:HGNC Symbol;Acc:HGNC:4669]	no
ENSG00000100227	-0.345	0.002	0.005	22	POLDIP3	42583721	42614962	DNA polymerase delta interacting protein 3 [Source:HGNC Symbol;Acc:HGNC:23782]	no
ENSG00000100228	0.441	4.8e-05	0.00023	22	RAB36	23145366	23165663	RAB36, member RAS oncogene family [Source:HGNC Symbol;Acc:HGNC:9775]	no
ENSG00000100234	0.211	0.061	0.107	22	TIMP3	32801705	32863041	TIMP metallopeptidase inhibitor 3 [Source:HGNC Symbol;Acc:HGNC:11822]	no
ENSG00000100239	0.441	4.8e-05	0.00023	22	PPP6R2	50343304	50445090	protein phosphatase 6 regulatory subunit 2 [Source:HGNC Symbol;Acc:HGNC:19253]	no
ENSG00000100241	0.368	0.00086	0.003	22	SBF1	50443219	50483923	SET binding factor 1 [Source:HGNC Symbol;Acc:HGNC:10542]	no
ENSG00000100242	0.489	4.9e-06	3.3e-05	22	SUN2	38733290	38794143	Sad1 and UNC84 domain containing 2 [Source:HGNC Symbol;Acc:HGNC:14210]	no
ENSG00000100243	0.228	0.043	0.08	22	CYB5R3	42615730	42720870	cytochrome b5 reductase 3 [Source:HGNC Symbol;Acc:HGNC:2873]	no
ENSG00000100246	0.168	0.139	0.212	22	DNAL4	38778508	38794198	dynein axonemal light chain 4 [Source:HGNC Symbol;Acc:HGNC:2955]	no
ENSG00000100258	0.344	0.002	0.006	22	LMF2	50502949	50507702	lipase maturation factor 2 [Source:HGNC Symbol;Acc:HGNC:25096]	no
ENSG00000100263	-0.176	0.122	0.19	22	RHBDD3	29259872	29268209	rhomboid domain containing 3 [Source:HGNC Symbol;Acc:HGNC:1308]	no
ENSG00000100266	-0.128	0.262	0.357	22	PACSIN2	42835412	43015149	protein kinase C and casein kinase substrate in neurons 2 [Source:HGNC Symbol;Acc:HGNC:8571]	no
ENSG00000100271	-0.495	3.5e-06	2.4e-05	22	TTLL1	43039516	43089419	TTL family tubulin polyglutamylase complex subunit L1 [Source:HGNC Symbol;Acc:HGNC:1312]	no
ENSG00000100280	0.107	0.349	0.45	22	AP1B1	29327680	29388583	adaptor related protein complex 1 subunit beta 1 [Source:HGNC Symbol;Acc:HGNC:554]	no
ENSG00000100281	-0.274	0.015	0.032	22	HMGXB4	35257452	35295807	HMG-box containing 4 [Source:HGNC Symbol;Acc:HGNC:5003]	no
ENSG00000100284	-0.044	0.701	0.769	22	TOM1	35299275	35347992	target of myb1 membrane trafficking protein [Source:HGNC Symbol;Acc:HGNC:11982]	no
ENSG00000274993	0.721	7e-14	5.4e-12	7	ENSG00000274993	100963828	100968124	novel transcript	no
ENSG00000100292	-0.02	0.86	0.896	22	HMOX1	35380361	35394214	heme oxygenase 1 [Source:HGNC Symbol;Acc:HGNC:5013]	no
ENSG00000100294	-0.268	0.017	0.036	22	MCAT	43132209	43143398	malonyl-CoA-acyl carrier protein transacylase [Source:HGNC Symbol;Acc:HGNC:29622]	no
ENSG00000100296	-0.459	2.1e-05	0.00011	22	THOC5	29505879	29555216	THO complex subunit 5 [Source:HGNC Symbol;Acc:HGNC:19074]	no
ENSG00000100297	0.104	0.363	0.463	22	MCM5	35400134	35425431	minichromosome maintenance complex component 5 [Source:HGNC Symbol;Acc:HGNC:6948]	no
ENSG00000100298	-0.196	0.083	0.138	22	APOBEC3H	39097224	39104067	apolipoprotein B mRNA editing enzyme catalytic subunit 3H [Source:HGNC Symbol;Acc:HGNC:24100]	no
ENSG00000100299	0.311	0.005	0.013	22	ARSA	50622754	50628173	arylsulfatase A [Source:HGNC Symbol;Acc:HGNC:713]	no
ENSG00000100300	0.379	0.00058	0.002	22	TSPO	43151547	43163242	translocator protein [Source:HGNC Symbol;Acc:HGNC:1158]	no
ENSG00000100302	0.425	9.6e-05	0.00042	22	RASD2	35540831	35553999	RASD family member 2 [Source:HGNC Symbol;Acc:HGNC:18229]	no
ENSG00000100304	-0.033	0.775	0.83	22	TTLL12	43166622	43187134	tubulin tyrosine ligase like 12 [Source:HGNC Symbol;Acc:HGNC:28974]	no
ENSG00000100307	0.377	0.00061	0.002	22	CBX7	39120167	39152680	chromobox 7 [Source:HGNC Symbol;Acc:HGNC:1557]	no
ENSG00000100311	-0.102	0.373	0.474	22	PDGFB	39223359	39244982	platelet derived growth factor subunit B [Source:HGNC Symbol;Acc:HGNC:8800]	no
ENSG00000100316	0.008	0.943	0.958	22	RPL3	39312882	39320389	ribosomal protein L3 [Source:HGNC Symbol;Acc:HGNC:10332]	no
ENSG00000100319	0.106	0.354	0.454	22	ZMAT5	29730956	29767011	zinc finger matrin-type 5 [Source:HGNC Symbol;Acc:HGNC:28046]	no
ENSG00000100320	-0.115	0.312	0.41	22	RBFOX2	35738736	36028824	RNA binding fox-1 homolog 2 [Source:HGNC Symbol;Acc:HGNC:9906]	no
ENSG00000100321	0.259	0.021	0.044	22	SYNGR1	39349925	39385575	synaptogyrin 1 [Source:HGNC Symbol;Acc:HGNC:11498]	no
ENSG00000100324	0.347	0.002	0.005	22	TAB1	39399778	39437060	TGF-beta activated kinase 1 (MAP3K7) binding protein 1 [Source:HGNC Symbol;Acc:HGNC:18157]	no
ENSG00000100325	-0.27	0.016	0.035	22	ASCC2	29788609	29838304	activating signal cointegrator 1 complex subunit 2 [Source:HGNC Symbol;Acc:HGNC:24103]	no
ENSG00000100330	0.231	0.041	0.076	22	MTMR3	29883169	30030868	myotubularin related protein 3 [Source:HGNC Symbol;Acc:HGNC:7451]	no
ENSG00000100335	0.213	0.06	0.105	22	MIEF1	39499432	39518132	mitochondrial elongation factor 1 [Source:HGNC Symbol;Acc:HGNC:25979]	no
ENSG00000100341	0.463	1.7e-05	9.6e-05	22	PNPLA5	43879678	43892013	patatin like phospholipase domain containing 5 [Source:HGNC Symbol;Acc:HGNC:24888]	no
ENSG00000100344	0.183	0.107	0.171	22	PNPLA3	43923792	43964488	patatin like phospholipase domain containing 3 [Source:HGNC Symbol;Acc:HGNC:18590]	no
ENSG00000100345	0.151	0.185	0.269	22	MYH9	36281280	36388010	myosin heavy chain 9 [Source:HGNC Symbol;Acc:HGNC:7579]	no
ENSG00000135976	0.72	7.2e-14	5.5e-12	2	ANKRD36	97113153	97264521	ankyrin repeat domain 36 [Source:HGNC Symbol;Acc:HGNC:24079]	no
ENSG00000100347	-0.373	0.00072	0.002	22	SAMM50	43955442	44010531	SAMM50 sorting and assembly machinery component [Source:HGNC Symbol;Acc:HGNC:24276]	no
ENSG00000100348	0.022	0.846	0.884	22	TXN2	36467046	36481640	thioredoxin 2 [Source:HGNC Symbol;Acc:HGNC:17772]	no
ENSG00000100350	-0.335	0.003	0.007	22	FOXRED2	36487190	36507221	FAD dependent oxidoreductase domain containing 2 [Source:HGNC Symbol;Acc:HGNC:26264]	no
ENSG00000100353	0.154	0.176	0.257	22	EIF3D	36510855	36529184	eukaryotic translation initiation factor 3 subunit D [Source:HGNC Symbol;Acc:HGNC:3278]	no
ENSG00000100354	0.354	0.001	0.004	22	TNRC6B	40044817	40335808	trinucleotide repeat containing adaptor 6B [Source:HGNC Symbol;Acc:HGNC:29190]	no
ENSG00000100359	0.254	0.024	0.049	22	SGSM3	40370591	40410289	small G protein signaling modulator 3 [Source:HGNC Symbol;Acc:HGNC:25228]	no
ENSG00000100360	-0.049	0.669	0.743	22	IFT27	36758202	36776256	intraflagellar transport 27 [Source:HGNC Symbol;Acc:HGNC:18626]	no
ENSG00000100362	0.05	0.664	0.738	22	PVALB	36800684	36819479	parvalbumin [Source:HGNC Symbol;Acc:HGNC:9704]	no
ENSG00000100364	0.269	0.017	0.035	22	KIAA0930	45192244	45240894	KIAA0930 [Source:HGNC Symbol;Acc:HGNC:1314]	no
ENSG00000100372	-0.382	0.00052	0.002	22	SLC25A17	40769630	40819399	solute carrier family 25 member 17 [Source:HGNC Symbol;Acc:HGNC:10987]	no
ENSG00000100376	0.147	0.197	0.282	22	FAM118A	45308968	45341955	family with sequence similarity 118 member A [Source:HGNC Symbol;Acc:HGNC:1313]	no
ENSG00000100379	0.029	0.798	0.848	22	KCTD17	37051739	37063390	potassium channel tetramerization domain containing 17 [Source:HGNC Symbol;Acc:HGNC:25705]	no
ENSG00000100380	-0.697	9.8e-13	5.3e-11	22	ST13	40824535	40856639	ST13 Hsp70 interacting protein [Source:HGNC Symbol;Acc:HGNC:11343]	no
ENSG00000100387	-0.339	0.002	0.006	22	RBX1	40951347	40973309	ring-box 1 [Source:HGNC Symbol;Acc:HGNC:9928]	no
ENSG00000100393	0.481	7.1e-06	4.5e-05	22	EP300	41092592	41180077	E1A binding protein p300 [Source:HGNC Symbol;Acc:HGNC:3373]	no
ENSG00000100395	-0.277	0.013	0.029	22	L3MBTL2	41205282	41231271	L3MBTL histone methyl-lysine binding protein 2 [Source:HGNC Symbol;Acc:HGNC:18594]	no
ENSG00000100401	0.168	0.139	0.211	22	RANGAP1	41244779	41286187	Ran GTPase activating protein 1 [Source:HGNC Symbol;Acc:HGNC:9854]	no
ENSG00000100403	0.235	0.037	0.07	22	ZC3H7B	41301525	41360147	zinc finger CCCH-type containing 7B [Source:HGNC Symbol;Acc:HGNC:30869]	no
ENSG00000100410	-0.159	0.161	0.239	22	PHF5A	41459717	41468692	PHD finger protein 5A [Source:HGNC Symbol;Acc:HGNC:18000]	no
ENSG00000100412	0.067	0.556	0.647	22	ACO2	41447830	41529273	aconitase 2 [Source:HGNC Symbol;Acc:HGNC:118]	no
ENSG00000100413	0.282	0.012	0.027	22	POLR3H	41525799	41544606	RNA polymerase III subunit H [Source:HGNC Symbol;Acc:HGNC:30349]	no
ENSG00000100416	0.193	0.088	0.144	22	TRMU	46330875	46357340	tRNA mitochondrial 2-thiouridylase [Source:HGNC Symbol;Acc:HGNC:25481]	no
ENSG00000100417	0.403	0.00023	0.00089	22	PMM1	41576900	41589871	phosphomannomutase 1 [Source:HGNC Symbol;Acc:HGNC:9114]	no
ENSG00000100418	0.424	0.0001	0.00044	22	DESI1	41598028	41621043	desumoylating isopeptidase 1 [Source:HGNC Symbol;Acc:HGNC:24577]	no
ENSG00000100422	-0.035	0.759	0.817	22	CERK	46684410	46738252	ceramide kinase [Source:HGNC Symbol;Acc:HGNC:19256]	no
ENSG00000100425	-0.146	0.198	0.284	22	BRD1	49773283	49827873	bromodomain containing 1 [Source:HGNC Symbol;Acc:HGNC:1102]	no
ENSG00000100426	0.235	0.037	0.071	22	ZBED4	49853844	49890080	zinc finger BED-type containing 4 [Source:HGNC Symbol;Acc:HGNC:20721]	no
ENSG00000100439	-0.402	0.00024	0.00093	14	ABHD4	22598290	22612963	abhydrolase domain containing 4, N-acyl phospholipase B [Source:HGNC Symbol;Acc:HGNC:20154]	no
ENSG00000100441	0.196	0.083	0.138	14	KHNYN	24429286	24441843	KH and NYN domain containing [Source:HGNC Symbol;Acc:HGNC:20166]	no
ENSG00000100442	-0.317	0.004	0.011	14	FKBP3	45115599	45135319	FKBP prolyl isomerase 3 [Source:HGNC Symbol;Acc:HGNC:3719]	no
ENSG00000100445	0.406	0.00021	0.00083	14	SDR39U1	24439766	24442905	short chain dehydrogenase/reductase family 39U member 1 [Source:HGNC Symbol;Acc:HGNC:20275]	no
ENSG00000100461	-0.647	1.2e-10	3.5e-09	14	RBM23	22893204	22919182	RNA binding motif protein 23 [Source:HGNC Symbol;Acc:HGNC:20155]	no
ENSG00000100462	-0.187	0.098	0.159	14	PRMT5	22920525	22929408	protein arginine methyltransferase 5 [Source:HGNC Symbol;Acc:HGNC:10894]	no
ENSG00000100473	0.371	0.00076	0.003	14	COCH	30874514	30895065	cochlin [Source:HGNC Symbol;Acc:HGNC:2180]	no
ENSG00000100478	-0.554	1.2e-07	1.3e-06	14	AP4S1	31025106	31130996	adaptor related protein complex 4 subunit sigma 1 [Source:HGNC Symbol;Acc:HGNC:575]	no
ENSG00000100479	-0.07	0.54	0.632	14	POLE2	49643555	49688422	DNA polymerase epsilon 2, accessory subunit [Source:HGNC Symbol;Acc:HGNC:9178]	no
ENSG00000100483	0.017	0.883	0.913	14	VCPKMT	50108632	50116600	valosin containing protein lysine methyltransferase [Source:HGNC Symbol;Acc:HGNC:20352]	no
ENSG00000100485	-0.392	0.00036	0.001	14	SOS2	50117130	50231578	SOS Ras/Rho guanine nucleotide exchange factor 2 [Source:HGNC Symbol;Acc:HGNC:11188]	no
ENSG00000100503	0.078	0.492	0.588	14	NIN	50719763	50831162	ninein [Source:HGNC Symbol;Acc:HGNC:14906]	no
ENSG00000100504	-0.065	0.569	0.658	14	PYGL	50857891	50944483	glycogen phosphorylase L [Source:HGNC Symbol;Acc:HGNC:9725]	no
ENSG00000100505	0.442	4.5e-05	0.00022	14	TRIM9	50975262	51096061	tripartite motif containing 9 [Source:HGNC Symbol;Acc:HGNC:16288]	no
ENSG00000100519	-0.246	0.029	0.056	14	PSMC6	52707178	52728590	proteasome 26S subunit, ATPase 6 [Source:HGNC Symbol;Acc:HGNC:9553]	no
ENSG00000100522	-0.078	0.492	0.588	14	GNPNAT1	52775193	52791668	glucosamine-phosphate N-acetyltransferase 1 [Source:HGNC Symbol;Acc:HGNC:19980]	no
ENSG00000100523	0.474	1e-05	6.2e-05	14	DDHD1	53036745	53153323	DDHD domain containing 1 [Source:HGNC Symbol;Acc:HGNC:19714]	no
ENSG00000100526	-0.352	0.001	0.004	14	CDKN3	54396849	54420218	cyclin dependent kinase inhibitor 3 [Source:HGNC Symbol;Acc:HGNC:1791]	no
ENSG00000100528	-0.213	0.06	0.104	14	CNIH1	54423561	54441391	cornichon family AMPA receptor auxiliary protein 1 [Source:HGNC Symbol;Acc:HGNC:19431]	no
ENSG00000100532	-0.421	0.00011	0.00049	14	CGRRF1	54509812	54539292	cell growth regulator with ring finger domain 1 [Source:HGNC Symbol;Acc:HGNC:15528]	no
ENSG00000100554	-0.385	0.00047	0.002	14	ATP6V1D	67294371	67360265	ATPase H+ transporting V1 subunit D [Source:HGNC Symbol;Acc:HGNC:13527]	no
ENSG00000100564	-0.055	0.629	0.709	14	PIGH	67581955	67600286	phosphatidylinositol glycan anchor biosynthesis class H [Source:HGNC Symbol;Acc:HGNC:8964]	no
ENSG00000100567	0.009	0.94	0.956	14	PSMA3	58244843	58272012	proteasome 20S subunit alpha 3 [Source:HGNC Symbol;Acc:HGNC:9532]	no
ENSG00000100568	-0.455	2.5e-05	0.00013	14	VTI1B	67647085	67674820	vesicle transport through interaction with t-SNAREs 1B [Source:HGNC Symbol;Acc:HGNC:17793]	no
ENSG00000100575	0.151	0.183	0.266	14	TIMM9	58408495	58427531	translocase of inner mitochondrial membrane 9 [Source:HGNC Symbol;Acc:HGNC:11819]	no
ENSG00000100577	0.093	0.415	0.515	14	GSTZ1	77320996	77331597	glutathione S-transferase zeta 1 [Source:HGNC Symbol;Acc:HGNC:4643]	no
ENSG00000100578	-0.167	0.14	0.213	14	KIAA0586	58427385	58551297	KIAA0586 [Source:HGNC Symbol;Acc:HGNC:19960]	no
ENSG00000100580	0.272	0.015	0.033	14	TMED8	77335029	77377094	transmembrane p24 trafficking protein family member 8 [Source:HGNC Symbol;Acc:HGNC:18633]	no
ENSG00000100591	0.457	2.3e-05	0.00012	14	AHSA1	77457870	77469472	activator of HSP90 ATPase activity 1 [Source:HGNC Symbol;Acc:HGNC:1189]	no
ENSG00000100592	-0.282	0.012	0.026	14	DAAM1	59188646	59371405	dishevelled associated activator of morphogenesis 1 [Source:HGNC Symbol;Acc:HGNC:18142]	no
ENSG00000100596	-0.059	0.605	0.689	14	SPTLC2	77505997	77616637	serine palmitoyltransferase long chain base subunit 2 [Source:HGNC Symbol;Acc:HGNC:11278]	no
ENSG00000100599	0.212	0.061	0.106	14	RIN3	92513781	92688994	Ras and Rab interactor 3 [Source:HGNC Symbol;Acc:HGNC:18751]	no
ENSG00000100600	-0.405	0.00021	0.00084	14	LGMN	92703807	92748679	legumain [Source:HGNC Symbol;Acc:HGNC:9472]	no
ENSG00000100601	-0.597	6.4e-09	1.1e-07	14	ALKBH1	77672404	77708023	alkB homolog 1, histone H2A dioxygenase [Source:HGNC Symbol;Acc:HGNC:17911]	no
ENSG00000100603	-0.431	7.4e-05	0.00034	14	SNW1	77717599	77761207	SNW domain containing 1 [Source:HGNC Symbol;Acc:HGNC:16696]	no
ENSG00000100604	-0.159	0.163	0.241	14	CHGA	92923150	92935285	chromogranin A [Source:HGNC Symbol;Acc:HGNC:1929]	no
ENSG00000100605	0.016	0.887	0.916	14	ITPK1	92936914	93116320	inositol-tetrakisphosphate 1-kinase [Source:HGNC Symbol;Acc:HGNC:6177]	no
ENSG00000100612	-0.204	0.071	0.121	14	DHRS7	60144119	60169856	dehydrogenase/reductase 7 [Source:HGNC Symbol;Acc:HGNC:21524]	no
ENSG00000100614	-0.142	0.212	0.3	14	PPM1A	60245752	60299087	protein phosphatase, Mg2+/Mn2+ dependent 1A [Source:HGNC Symbol;Acc:HGNC:9275]	no
ENSG00000100625	-0.283	0.012	0.026	14	SIX4	60709539	60724351	SIX homeobox 4 [Source:HGNC Symbol;Acc:HGNC:10890]	no
ENSG00000100626	0.435	6.1e-05	0.00029	14	GALNT16	69259277	69357033	polypeptide N-acetylgalactosaminyltransferase 16 [Source:HGNC Symbol;Acc:HGNC:23233]	no
ENSG00000100629	-0.546	2e-07	2.1e-06	14	CEP128	80476983	80959517	centrosomal protein 128 [Source:HGNC Symbol;Acc:HGNC:20359]	no
ENSG00000100632	-0.09	0.431	0.529	14	ERH	69380128	69398299	ERH mRNA splicing and mitosis factor [Source:HGNC Symbol;Acc:HGNC:3447]	no
ENSG00000100644	-0.535	3.7e-07	3.6e-06	14	HIF1A	61695513	61748259	hypoxia inducible factor 1 subunit alpha [Source:HGNC Symbol;Acc:HGNC:4910]	no
ENSG00000101194	0.719	8.1e-14	6.1e-12	20	SLC17A9	62952707	62969585	solute carrier family 17 member 9 [Source:HGNC Symbol;Acc:HGNC:16192]	no
ENSG00000100650	-0.333	0.003	0.007	14	SRSF5	69726900	69772005	serine and arginine rich splicing factor 5 [Source:HGNC Symbol;Acc:HGNC:10787]	no
ENSG00000100664	-0.093	0.413	0.513	14	EIF5	103333544	103345025	eukaryotic translation initiation factor 5 [Source:HGNC Symbol;Acc:HGNC:3299]	no
ENSG00000100678	0.326	0.003	0.009	14	SLC8A3	70044215	70189480	solute carrier family 8 member A3 [Source:HGNC Symbol;Acc:HGNC:11070]	no
ENSG00000100697	0.146	0.199	0.285	14	DICER1	95086228	95158010	dicer 1, ribonuclease III [Source:HGNC Symbol;Acc:HGNC:17098]	no
ENSG00000100711	-0.134	0.239	0.332	14	ZFYVE21	103715730	103733668	zinc finger FYVE-type containing 21 [Source:HGNC Symbol;Acc:HGNC:20760]	no
ENSG00000100714	-0.065	0.569	0.657	14	MTHFD1	64388031	64463457	methylenetetrahydrofolate dehydrogenase, cyclohydrolase and formyltetrahydrofolate synthetase 1 [Source:HGNC Symbol;Acc:HGNC:7432]	no
ENSG00000100721	0.182	0.107	0.171	14	TCL1A	95709947	95714196	TCL1 family AKT coactivator A [Source:HGNC Symbol;Acc:HGNC:11648]	no
ENSG00000100722	-0.48	7.6e-06	4.8e-05	14	ZC3H14	88562970	88627596	zinc finger CCCH-type containing 14 [Source:HGNC Symbol;Acc:HGNC:20509]	no
ENSG00000100726	0.094	0.409	0.508	16	TELO2	1493344	1510457	telomere maintenance 2 [Source:HGNC Symbol;Acc:HGNC:29099]	no
ENSG00000100731	0.373	0.0007	0.002	14	PCNX1	70907405	71115382	pecanex 1 [Source:HGNC Symbol;Acc:HGNC:19740]	no
ENSG00000100744	-0.163	0.151	0.226	14	GSKIP	96363452	96387288	GSK3B interacting protein [Source:HGNC Symbol;Acc:HGNC:20343]	no
ENSG00000100749	-0.4	0.00026	0.001	14	VRK1	96797304	96954846	VRK serine/threonine kinase 1 [Source:HGNC Symbol;Acc:HGNC:12718]	no
ENSG00000100764	-0.021	0.855	0.891	14	PSMC1	90256527	90275429	proteasome 26S subunit, ATPase 1 [Source:HGNC Symbol;Acc:HGNC:9547]	no
ENSG00000197694	0.718	9.9e-14	7.3e-12	9	SPTAN1	128552558	128633662	spectrin alpha, non-erythrocytic 1 [Source:HGNC Symbol;Acc:HGNC:11273]	no
ENSG00000100784	0.357	0.001	0.004	14	RPS6KA5	90847861	91060641	ribosomal protein S6 kinase A5 [Source:HGNC Symbol;Acc:HGNC:10434]	no
ENSG00000100796	-0.36	0.001	0.004	14	PPP4R3A	91457508	91510554	protein phosphatase 4 regulatory subunit 3A [Source:HGNC Symbol;Acc:HGNC:20219]	no
ENSG00000100802	0.102	0.373	0.473	14	C14orf93	22985894	23010166	chromosome 14 open reading frame 93 [Source:HGNC Symbol;Acc:HGNC:20162]	no
ENSG00000100804	0.347	0.002	0.005	14	PSMB5	23016543	23035230	proteasome 20S subunit beta 5 [Source:HGNC Symbol;Acc:HGNC:9542]	no
ENSG00000100811	-0.491	4.4e-06	3e-05	14	YY1	100238298	100282788	YY1 transcription factor [Source:HGNC Symbol;Acc:HGNC:12856]	no
ENSG00000100813	0.063	0.582	0.669	14	ACIN1	23058564	23095614	apoptotic chromatin condensation inducer 1 [Source:HGNC Symbol;Acc:HGNC:17066]	no
ENSG00000100814	-0.348	0.002	0.005	14	CCNB1IP1	20311368	20333312	cyclin B1 interacting protein 1 [Source:HGNC Symbol;Acc:HGNC:19437]	no
ENSG00000100815	-0.07	0.541	0.633	14	TRIP11	91965991	92040896	thyroid hormone receptor interactor 11 [Source:HGNC Symbol;Acc:HGNC:12305]	no
ENSG00000100823	0.009	0.936	0.953	14	APEX1	20455191	20457772	apurinic/apyrimidinic endodeoxyribonuclease 1 [Source:HGNC Symbol;Acc:HGNC:587]	no
ENSG00000100836	0.281	0.012	0.027	14	PABPN1	23321457	23326163	poly(A) binding protein nuclear 1 [Source:HGNC Symbol;Acc:HGNC:8565]	no
ENSG00000100842	-0.117	0.304	0.402	14	EFS	23356403	23365752	embryonal Fyn-associated substrate [Source:HGNC Symbol;Acc:HGNC:16898]	no
ENSG00000100852	-0.389	0.00039	0.001	14	ARHGAP5	32076114	32159728	Rho GTPase activating protein 5 [Source:HGNC Symbol;Acc:HGNC:675]	no
ENSG00000100865	0.192	0.09	0.147	14	CINP	102341102	102362916	cyclin dependent kinase 2 interacting protein [Source:HGNC Symbol;Acc:HGNC:23789]	no
ENSG00000100883	-0.335	0.003	0.007	14	SRP54	34981957	35029686	signal recognition particle 54 [Source:HGNC Symbol;Acc:HGNC:11301]	no
ENSG00000100888	0.14	0.218	0.308	14	CHD8	21385194	21456126	chromodomain helicase DNA binding protein 8 [Source:HGNC Symbol;Acc:HGNC:20153]	no
ENSG00000100889	0.276	0.014	0.03	14	PCK2	24094053	24110598	phosphoenolpyruvate carboxykinase 2, mitochondrial [Source:HGNC Symbol;Acc:HGNC:8725]	no
ENSG00000100890	-0.251	0.026	0.051	14	PRORP	35121846	35277622	protein only RNase P catalytic subunit [Source:HGNC Symbol;Acc:HGNC:19958]	no
ENSG00000100897	-0.211	0.062	0.107	14	DCAF11	24114195	24125242	DDB1 and CUL4 associated factor 11 [Source:HGNC Symbol;Acc:HGNC:20258]	no
ENSG00000100902	0.108	0.345	0.445	14	PSMA6	35278633	35317493	proteasome 20S subunit alpha 6 [Source:HGNC Symbol;Acc:HGNC:9535]	no
ENSG00000100906	-0.08	0.486	0.582	14	NFKBIA	35401079	35404749	NFKB inhibitor alpha [Source:HGNC Symbol;Acc:HGNC:7797]	no
ENSG00000100908	-0.228	0.044	0.08	14	EMC9	24138959	24141591	ER membrane protein complex subunit 9 [Source:HGNC Symbol;Acc:HGNC:20273]	no
ENSG00000100911	-0.346	0.002	0.005	14	PSME2	24143362	24147570	proteasome activator subunit 2 [Source:HGNC Symbol;Acc:HGNC:9569]	no
ENSG00000100916	-0.554	1.2e-07	1.3e-06	14	BRMS1L	35826338	35932325	BRMS1 like transcriptional repressor [Source:HGNC Symbol;Acc:HGNC:20512]	no
ENSG00000100918	-0.177	0.119	0.186	14	REC8	24171853	24180257	REC8 meiotic recombination protein [Source:HGNC Symbol;Acc:HGNC:16879]	no
ENSG00000100934	-0.266	0.018	0.038	14	SEC23A	39031919	39109646	SEC23 homolog A, COPII coat complex component [Source:HGNC Symbol;Acc:HGNC:10701]	no
ENSG00000100938	-0.417	0.00013	0.00055	14	GMPR2	24232422	24239242	guanosine monophosphate reductase 2 [Source:HGNC Symbol;Acc:HGNC:4377]	no
ENSG00000100941	0.067	0.556	0.647	14	PNN	39175183	39183220	pinin, desmosome associated protein [Source:HGNC Symbol;Acc:HGNC:9162]	no
ENSG00000100949	-0.161	0.157	0.234	14	RABGGTA	24265538	24271611	Rab geranylgeranyltransferase subunit alpha [Source:HGNC Symbol;Acc:HGNC:9795]	no
ENSG00000100968	-0.075	0.511	0.604	14	NFATC4	24365673	24379604	nuclear factor of activated T cells 4 [Source:HGNC Symbol;Acc:HGNC:7778]	no
ENSG00000100979	-0.398	0.00028	0.001	20	PLTP	45898621	45912155	phospholipid transfer protein [Source:HGNC Symbol;Acc:HGNC:9093]	no
ENSG00000100982	0.095	0.407	0.506	20	PCIF1	45934683	45948023	phosphorylated CTD interacting factor 1 [Source:HGNC Symbol;Acc:HGNC:16200]	no
ENSG00000100983	-0.39	0.00039	0.001	20	GSS	34928432	34956027	glutathione synthetase [Source:HGNC Symbol;Acc:HGNC:4624]	no
ENSG00000100985	0.268	0.017	0.036	20	MMP9	46008908	46016561	matrix metallopeptidase 9 [Source:HGNC Symbol;Acc:HGNC:7176]	no
ENSG00000100991	0.054	0.636	0.715	20	TRPC4AP	35002404	35092807	transient receptor potential cation channel subfamily C member 4 associated protein [Source:HGNC Symbol;Acc:HGNC:16181]	no
ENSG00000100994	-0.092	0.422	0.522	20	PYGB	25248085	25298012	glycogen phosphorylase B [Source:HGNC Symbol;Acc:HGNC:9723]	no
ENSG00000100997	-0.359	0.001	0.004	20	ABHD12	25294742	25390835	abhydrolase domain containing 12, lysophospholipase [Source:HGNC Symbol;Acc:HGNC:15868]	no
ENSG00000101000	-0.059	0.604	0.689	20	PROCR	35172072	35216240	protein C receptor [Source:HGNC Symbol;Acc:HGNC:9452]	no
ENSG00000101003	-0.487	5.4e-06	3.5e-05	20	GINS1	25391008	25452700	GINS complex subunit 1 [Source:HGNC Symbol;Acc:HGNC:28980]	no
ENSG00000101004	0.263	0.019	0.04	20	NINL	25451594	25585531	ninein like [Source:HGNC Symbol;Acc:HGNC:29163]	no
ENSG00000101017	0.153	0.179	0.261	20	CD40	46118271	46129863	CD40 molecule [Source:HGNC Symbol;Acc:HGNC:11919]	no
ENSG00000101019	-0.096	0.402	0.503	20	UQCC1	35302566	35412031	ubiquinol-cytochrome c reductase complex assembly factor 1 [Source:HGNC Symbol;Acc:HGNC:15891]	no
ENSG00000101040	-0.23	0.041	0.077	20	ZMYND8	47209214	47356889	zinc finger MYND-type containing 8 [Source:HGNC Symbol;Acc:HGNC:9397]	no
ENSG00000101052	0.356	0.001	0.004	20	IFT52	43590937	43647299	intraflagellar transport 52 [Source:HGNC Symbol;Acc:HGNC:15901]	no
ENSG00000101057	0.266	0.018	0.037	20	MYBL2	43667019	43716495	MYB proto-oncogene like 2 [Source:HGNC Symbol;Acc:HGNC:7548]	no
ENSG00000101079	0.206	0.068	0.117	20	NDRG3	36651766	36746090	NDRG family member 3 [Source:HGNC Symbol;Acc:HGNC:14462]	no
ENSG00000101096	0.128	0.261	0.356	20	NFATC2	51386957	51562831	nuclear factor of activated T cells 2 [Source:HGNC Symbol;Acc:HGNC:7776]	no
ENSG00000101098	-0.269	0.017	0.036	20	RIMS4	44751808	44810546	regulating synaptic membrane exocytosis 4 [Source:HGNC Symbol;Acc:HGNC:16183]	no
ENSG00000230922	0.717	1.1e-13	8e-12	22	ENSG00000230922	45000565	45003619	novel transcript	no
ENSG00000101109	-0.28	0.013	0.028	20	STK4	44966494	45080021	serine/threonine kinase 4 [Source:HGNC Symbol;Acc:HGNC:11408]	no
ENSG00000101115	-0.224	0.047	0.086	20	SALL4	51782331	51802521	spalt like transcription factor 4 [Source:HGNC Symbol;Acc:HGNC:15924]	no
ENSG00000101126	-0.243	0.031	0.06	20	ADNP	50888916	50931437	activity dependent neuroprotector homeobox [Source:HGNC Symbol;Acc:HGNC:15766]	no
ENSG00000101132	0.112	0.325	0.424	20	PFDN4	54208087	54228052	prefoldin subunit 4 [Source:HGNC Symbol;Acc:HGNC:8868]	no
ENSG00000101134	-0.152	0.18	0.263	20	DOK5	54475593	54651169	docking protein 5 [Source:HGNC Symbol;Acc:HGNC:16173]	no
ENSG00000101138	-0.143	0.209	0.297	20	CSTF1	56392371	56406362	cleavage stimulation factor subunit 1 [Source:HGNC Symbol;Acc:HGNC:2483]	no
ENSG00000101144	-0.101	0.374	0.475	20	BMP7	57168753	57266641	bone morphogenetic protein 7 [Source:HGNC Symbol;Acc:HGNC:1074]	no
ENSG00000101146	-0.224	0.047	0.086	20	RAE1	57351223	57379211	ribonucleic acid export 1 [Source:HGNC Symbol;Acc:HGNC:9828]	no
ENSG00000101150	-0.297	0.008	0.019	20	TPD52L2	63865228	63891545	TPD52 like 2 [Source:HGNC Symbol;Acc:HGNC:12007]	no
ENSG00000101152	-0.108	0.346	0.446	20	DNAJC5	63895126	63936031	DnaJ heat shock protein family (Hsp40) member C5 [Source:HGNC Symbol;Acc:HGNC:16235]	no
ENSG00000267321	0.717	1e-13	7.7e-12	17	SNHG30	35568050	35574900	small nucleolar RNA host gene 30 [Source:HGNC Symbol;Acc:HGNC:52836]	no
ENSG00000101160	0.046	0.689	0.76	20	CTSZ	58985686	59008238	cathepsin Z [Source:HGNC Symbol;Acc:HGNC:2547]	no
ENSG00000101161	-0.308	0.006	0.014	20	PRPF6	63981132	64033100	pre-mRNA processing factor 6 [Source:HGNC Symbol;Acc:HGNC:15860]	no
ENSG00000101166	-0.407	0.00019	0.00079	20	PRELID3B	59033145	59042809	PRELI domain containing 3B [Source:HGNC Symbol;Acc:HGNC:15892]	no
ENSG00000244198	0.714	1.5e-13	1.1e-11	7	ARHGEF35-AS1	144194858	144280547	ARHGEF35 antisense RNA 1 [Source:HGNC Symbol;Acc:HGNC:41292]	no
ENSG00000101181	0.22	0.051	0.092	20	MTG2	62183028	62203568	mitochondrial ribosome associated GTPase 2 [Source:HGNC Symbol;Acc:HGNC:16239]	no
ENSG00000101182	0.076	0.508	0.602	20	PSMA7	62136733	62143440	proteasome 20S subunit alpha 7 [Source:HGNC Symbol;Acc:HGNC:9536]	no
ENSG00000101187	0.482	6.9e-06	4.4e-05	20	SLCO4A1	62642503	62685785	solute carrier organic anion transporter family member 4A1 [Source:HGNC Symbol;Acc:HGNC:10953]	no
ENSG00000278662	0.712	2e-13	1.4e-11	15	GOLGA6L10	82339993	82349475	golgin A6 family like 10 [Source:HGNC Symbol;Acc:HGNC:37228]	no
ENSG00000101189	-0.109	0.34	0.44	20	MRGBP	62796473	62801729	MRG domain binding protein [Source:HGNC Symbol;Acc:HGNC:15866]	no
ENSG00000101190	-0.363	0.001	0.003	20	TCFL5	62841005	62861822	transcription factor like 5 [Source:HGNC Symbol;Acc:HGNC:11646]	no
ENSG00000101191	0.14	0.218	0.308	20	DIDO1	62877738	62937952	death inducer-obliterator 1 [Source:HGNC Symbol;Acc:HGNC:2680]	no
ENSG00000101193	-0.529	5.5e-07	5e-06	20	GID8	62938147	62948475	GID complex subunit 8 homolog [Source:HGNC Symbol;Acc:HGNC:15857]	no
ENSG00000169918	0.711	2.1e-13	1.4e-11	15	OTUD7A	31475398	31870789	OTU deubiquitinase 7A [Source:HGNC Symbol;Acc:HGNC:20718]	no
ENSG00000101198	-0.253	0.024	0.049	20	NKAIN4	63240784	63272694	sodium/potassium transporting ATPase interacting 4 [Source:HGNC Symbol;Acc:HGNC:16191]	no
ENSG00000101199	0.324	0.004	0.01	20	ARFGAP1	63272785	63289790	ADP ribosylation factor GTPase activating protein 1 [Source:HGNC Symbol;Acc:HGNC:15852]	no
ENSG00000183666	0.711	2.1e-13	1.4e-11	5	GUSBP1	21459560	21501826	GUSB pseudogene 1 [Source:HGNC Symbol;Acc:HGNC:13670]	no
ENSG00000101210	-0.428	8.4e-05	0.00038	20	EEF1A2	63488013	63499239	eukaryotic translation elongation factor 1 alpha 2 [Source:HGNC Symbol;Acc:HGNC:3192]	no
ENSG00000215156	0.71	2.5e-13	1.7e-11	5	ENSG00000215156	34190056	34193653	POM121-like protein 1 pseudogene	no
ENSG00000101220	0.186	0.101	0.162	20	C20orf27	3753508	3767781	chromosome 20 open reading frame 27 [Source:HGNC Symbol;Acc:HGNC:15873]	no
ENSG00000101224	0.318	0.004	0.011	20	CDC25B	3786772	3806121	cell division cycle 25B [Source:HGNC Symbol;Acc:HGNC:1726]	no
ENSG00000217165	0.71	2.4e-13	1.6e-11	6	ANKRD18EP	39110321	39112952	ankyrin repeat domain 18E, pseudogene [Source:HGNC Symbol;Acc:HGNC:43609]	no
ENSG00000101246	-0.347	0.002	0.005	20	ARFRP1	63698642	63708025	ADP ribosylation factor related protein 1 [Source:HGNC Symbol;Acc:HGNC:662]	no
ENSG00000101247	0.244	0.03	0.059	20	NDUFAF5	13785007	13821580	NADH:ubiquinone oxidoreductase complex assembly factor 5 [Source:HGNC Symbol;Acc:HGNC:15899]	no
ENSG00000101255	0.185	0.103	0.165	20	TRIB3	362835	397559	tribbles pseudokinase 3 [Source:HGNC Symbol;Acc:HGNC:16228]	no
ENSG00000244124	0.71	2.5e-13	1.6e-11	3	ATP1B3-AS1	141918252	141919021	ATP1B3 antisense RNA 1 [Source:HGNC Symbol;Acc:HGNC:40088]	no
ENSG00000101266	-0.255	0.023	0.047	20	CSNK2A1	472498	543835	casein kinase 2 alpha 1 [Source:HGNC Symbol;Acc:HGNC:2457]	no
ENSG00000185567	0.709	2.7e-13	1.8e-11	14	AHNAK2	104937244	104978374	AHNAK nucleoprotein 2 [Source:HGNC Symbol;Acc:HGNC:20125]	no
ENSG00000101280	-0.231	0.04	0.075	20	ANGPT4	869900	916334	angiopoietin 4 [Source:HGNC Symbol;Acc:HGNC:487]	no
ENSG00000101282	-0.219	0.052	0.093	20	RSPO4	958452	1002311	R-spondin 4 [Source:HGNC Symbol;Acc:HGNC:16175]	no
ENSG00000101290	-0.395	0.00032	0.001	20	CDS2	5126879	5197887	CDP-diacylglycerol synthase 2 [Source:HGNC Symbol;Acc:HGNC:1801]	no
ENSG00000101294	0.09	0.43	0.528	20	HM13	31514410	31577923	histocompatibility minor 13 [Source:HGNC Symbol;Acc:HGNC:16435]	no
ENSG00000266338	0.709	2.5e-13	1.7e-11	1	NBPF15	144421390	144461676	NBPF member 15 [Source:HGNC Symbol;Acc:HGNC:28791]	no
ENSG00000101310	-0.685	3.3e-12	1.6e-10	20	SEC23B	18507520	18561415	SEC23 homolog B, COPII coat complex component [Source:HGNC Symbol;Acc:HGNC:10702]	no
ENSG00000101311	-0.325	0.003	0.009	20	FERMT1	6074845	6123214	FERM domain containing kindlin 1 [Source:HGNC Symbol;Acc:HGNC:15889]	no
ENSG00000101331	-0.207	0.068	0.116	20	CCM2L	32010438	32032180	CCM2 like scaffold protein [Source:HGNC Symbol;Acc:HGNC:16153]	no
[truncated: 11,773 more rows]

## Sheet: Legend
Supplemental Data S6: Pearson correlation analysis in iPSCs. List of genes sensitive to Y Chromosome number.
