# Supplementary material for: An iPSC-based model of 47,XYY Jacobs syndrome reveals a DNA methylation-independent transcriptional dysregulation shared with male X aneuploid cells
Source: Genome Res. 2025 Jul;35(7):1503–17. doi: 10.1101/gr.279716.124 (PMC12212075; doi:10.1101/gr.279716.124)
Supplement: Supplement 8 [file Supplemental_Data_S7_R3.xlsx]

## Sheet: Fibroblasts
Supplemental Data S7: List of DMRs identified in the contrast 47,XYY vs 46,XY in fibroblasts
Ensembl_id	SYMBOL	chr	start	end	Contrast	length	nCG	areaStat	annotation	Direction	Description	gene.Location	annotation.clean	Cell_type	isPAR	Type	baseMean	log2FoldChange	lfcSE	stat	pvalue	padj	Direction_Rnaseq
ENSG00000001460	STPG1	1	24391860	24391940	Fibroblast.47XYY-Fibroblast.46XY	81	4	15.5809	Promoter (<=1kb)	Hyper	sperm tail PG-rich repeat containing 1	ENSG00000001460.Promoter	Promoter	Fibroblast	no		591.918	-0.237565	0.107019	-2.21985	0.0264288	0.104427	not sig
ENSG00000002822	MAD1L1	7	2082432	2082530	Fibroblast.47XYY-Fibroblast.46XY	99	10	-49.3659	Promoter (2-3kb)	Hypo	mitotic arrest deficient 1 like 1	ENSG00000002822.Promoter	Promoter	Fibroblast	no
ENSG00000002822	MAD1L1	7	1920157	1920324	Fibroblast.47XYY-Fibroblast.46XY	168	25	-171.493	Intron (ENST00000265854/ENSG00000002822, intron 15 of 16)	Hypo	mitotic arrest deficient 1 like 1	ENSG00000002822.GeneBody	GeneBody	Fibroblast	no
ENSG00000002822	MAD1L1	7	1953260	1953370	Fibroblast.47XYY-Fibroblast.46XY	111	4	-19.1182	Intron (ENST00000265854/ENSG00000002822, intron 14 of 16)	Hypo	mitotic arrest deficient 1 like 1	ENSG00000002822.GeneBody	GeneBody	Fibroblast	no
ENSG00000002822	MAD1L1	7	1914310	1914437	Fibroblast.47XYY-Fibroblast.46XY	128	20	92.7914	Intron (ENST00000265854/ENSG00000002822, intron 15 of 16)	Hyper	mitotic arrest deficient 1 like 1	ENSG00000002822.GeneBody	GeneBody	Fibroblast	no
ENSG00000003987	MTMR7	8	17413464	17413542	Fibroblast.47XYY-Fibroblast.46XY	79	26	-110.436	Promoter (<=1kb)	Hypo	myotubularin related protein 7	ENSG00000003987.Promoter	Promoter	Fibroblast	no
ENSG00000003987	MTMR7	8	17413168	17413317	Fibroblast.47XYY-Fibroblast.46XY	150	14	-68.8104	Promoter (<=1kb)	Hypo	myotubularin related protein 7	ENSG00000003987.Promoter	Promoter	Fibroblast	no
ENSG00000004399	PLXND1	3	129611985	129612228	Fibroblast.47XYY-Fibroblast.46XY	244	24	125.483	Distal Intergenic	Hyper	plexin D1	ENSG00000004399.Intergenic	Intergenic	Fibroblast	no		11084.7	-1.04829	0.184261	-5.68915	1.27675e-08	3.61127e-07	down
ENSG00000004468	CD38	4	15835537	15835673	Fibroblast.47XYY-Fibroblast.46XY	137	6	34.5712	Intron (ENST00000502843/ENSG00000004468, intron 3 of 6)	Hyper	CD38 molecule	ENSG00000004468.GeneBody	GeneBody	Fibroblast	no
ENSG00000005007	UPF1	19	18813476	18813682	Fibroblast.47XYY-Fibroblast.46XY	207	4	-22.4288	Distal Intergenic	Hypo	UPF1 RNA helicase and ATPase	ENSG00000005007.Intergenic	Intergenic	Fibroblast	no		4577.45	-0.210738	0.119039	-1.77033	0.0766727	0.227617	not sig
ENSG00000005206	SPPL2B	19	2341404	2341513	Fibroblast.47XYY-Fibroblast.46XY	110	9	40.3137	Promoter (1-2kb)	Hyper	signal peptide peptidase like 2B	ENSG00000005206.Promoter	Promoter	Fibroblast	no		1636.25	0.0772772	0.172083	0.44907	0.653381	0.818058	not sig
ENSG00000005302	MSL3	X	11792983	11793105	Fibroblast.47XYY-Fibroblast.46XY	123	8	38.9545	Distal Intergenic	Hyper	MSL complex subunit 3	ENSG00000005302.Intergenic	Intergenic	Fibroblast	no	escape	1438.68	0.0792199	0.172976	0.457981	0.646966	0.813693	not sig
ENSG00000005379	TSPOAP1	17	58327779	58327946	Fibroblast.47XYY-Fibroblast.46XY	168	8	54.6824	Promoter (<=1kb)	Hyper	TSPO associated protein 1	ENSG00000005379.Promoter	Promoter	Fibroblast	no		649.21	1.47346	0.198253	7.43222	1.0679e-13	7.34683e-12	up
ENSG00000005379	TSPOAP1	17	58309195	58309273	Fibroblast.47XYY-Fibroblast.46XY	79	4	18.513	Promoter (<=1kb)	Hyper	TSPO associated protein 1	ENSG00000005379.Promoter	Promoter	Fibroblast	no		649.21	1.47346	0.198253	7.43222	1.0679e-13	7.34683e-12	up
ENSG00000005379	TSPOAP1	17	58305186	58305404	Fibroblast.47XYY-Fibroblast.46XY	219	13	77.0109	Promoter (<=1kb)	Hyper	TSPO associated protein 1	ENSG00000005379.Promoter	Promoter	Fibroblast	no		649.21	1.47346	0.198253	7.43222	1.0679e-13	7.34683e-12	up
ENSG00000005471	ABCB4	7	87457145	87457266	Fibroblast.47XYY-Fibroblast.46XY	122	6	30.2539	Intron (ENST00000649586/ENSG00000005471, intron 4 of 27)	Hyper	ATP binding cassette subfamily B member 4	ENSG00000005471.GeneBody	GeneBody	Fibroblast	no		143.23	2.57107	0.398202	6.4567	1.07009e-10	4.61922e-09	up
ENSG00000005486	RHBDD2	7	75890186	75890315	Fibroblast.47XYY-Fibroblast.46XY	130	7	40.7011	Distal Intergenic	Hyper	rhomboid domain containing 2	ENSG00000005486.Intergenic	Intergenic	Fibroblast	no		1491.41	-0.410101	0.145809	-2.81259	0.00491442	0.0285339	not sig
ENSG00000005961	ITGA2B	17	44375910	44376022	Fibroblast.47XYY-Fibroblast.46XY	113	4	-22.9342	Promoter (<=1kb)	Hypo	integrin subunit alpha 2b	ENSG00000005961.Promoter	Promoter	Fibroblast	no
ENSG00000007168	PAFAH1B1	17	2631526	2631703	Fibroblast.47XYY-Fibroblast.46XY	178	9	62.5775	Intron (ENST00000576586/ENSG00000007168, intron 1 of 4)	Hyper	platelet activating factor acetylhydrolase 1b regulatory subunit 1	ENSG00000007168.GeneBody	GeneBody	Fibroblast	no		9015.79	-0.110601	0.104556	-1.05782	0.290139	0.530076	not sig
ENSG00000007174	DNAH9	17	11574137	11574255	Fibroblast.47XYY-Fibroblast.46XY	119	4	19.4888	Distal Intergenic	Hyper	dynein axonemal heavy chain 9	ENSG00000007174.Intergenic	Intergenic	Fibroblast	no
ENSG00000007174	DNAH9	17	11689018	11689081	Fibroblast.47XYY-Fibroblast.46XY	64	7	38.2926	Intron (ENST00000262442/ENSG00000007174, intron 19 of 68)	Hyper	dynein axonemal heavy chain 9	ENSG00000007174.GeneBody	GeneBody	Fibroblast	no
ENSG00000007402	CACNA2D2	3	50473959	50474090	Fibroblast.47XYY-Fibroblast.46XY	132	6	38.286	Intron (ENST00000423994/ENSG00000007402, intron 2 of 38)	Hyper	calcium voltage-gated channel auxiliary subunit alpha2delta 2	ENSG00000007402.GeneBody	GeneBody	Fibroblast	no
ENSG00000007923	DNAJC11	1	6703881	6703943	Fibroblast.47XYY-Fibroblast.46XY	63	6	27.0792	Promoter (1-2kb)	Hyper	DnaJ heat shock protein family (Hsp40) member C11	ENSG00000007923.Promoter	Promoter	Fibroblast	no		1832.38	-0.1403	0.149474	-0.938621	0.347925	0.587886	not sig
ENSG00000008256	CYTH3	7	6166394	6166512	Fibroblast.47XYY-Fibroblast.46XY	119	8	-45.605	Intron (ENST00000396741/ENSG00000008256, intron 9 of 12)	Hypo	cytohesin 3	ENSG00000008256.GeneBody	GeneBody	Fibroblast	no		7976.36	-0.45666	0.223859	-2.03994	0.0413559	0.145788	not sig
ENSG00000008256	CYTH3	7	6256186	6256249	Fibroblast.47XYY-Fibroblast.46XY	64	6	38.1811	Intron (ENST00000396741/ENSG00000008256, intron 1 of 12)	Hyper	cytohesin 3	ENSG00000008256.GeneBody	GeneBody	Fibroblast	no		7976.36	-0.45666	0.223859	-2.03994	0.0413559	0.145788	not sig
ENSG00000008277	ADAM22	7	88184964	88185052	Fibroblast.47XYY-Fibroblast.46XY	89	6	25.1612	Promoter (2-3kb)	Hyper	ADAM metallopeptidase domain 22	ENSG00000008277.Promoter	Promoter	Fibroblast	no
ENSG00000008294	SPAG9	17	50980455	50980525	Fibroblast.47XYY-Fibroblast.46XY	71	5	25.3885	Promoter (2-3kb)	Hyper	sperm associated antigen 9	ENSG00000008294.Promoter	Promoter	Fibroblast	no		9141.58	-0.448352	0.198538	-2.25827	0.0239291	0.097076	not sig
ENSG00000008323	PLEKHG6	12	6310113	6310200	Fibroblast.47XYY-Fibroblast.46XY	88	4	-19.8718	Promoter (<=1kb)	Hypo	pleckstrin homology and RhoGEF domain containing G6	ENSG00000008323.Promoter	Promoter	Fibroblast	no
ENSG00000008438	PGLYRP1	19	46022788	46022915	Fibroblast.47XYY-Fibroblast.46XY	128	19	113.736	Promoter (<=1kb)	Hyper	peptidoglycan recognition protein 1	ENSG00000008438.Promoter	Promoter	Fibroblast	no
ENSG00000008438	PGLYRP1	19	46022369	46022489	Fibroblast.47XYY-Fibroblast.46XY	121	13	56.7748	Promoter (<=1kb)	Hyper	peptidoglycan recognition protein 1	ENSG00000008438.Promoter	Promoter	Fibroblast	no
ENSG00000008441	NFIX	19	13070510	13070606	Fibroblast.47XYY-Fibroblast.46XY	97	4	24.0656	Promoter (<=1kb)	Hyper	nuclear factor I X	ENSG00000008441.Promoter	Promoter	Fibroblast	no		16314.6	0.0906054	0.192891	0.469723	0.638553	0.808323	not sig
ENSG00000009335	UBE3C	7	157229474	157229612	Fibroblast.47XYY-Fibroblast.46XY	139	4	21.4141	Intron (ENST00000348165/ENSG00000009335, intron 17 of 22)	Hyper	ubiquitin protein ligase E3C	ENSG00000009335.GeneBody	GeneBody	Fibroblast	no		6665.2	-0.270297	0.17359	-1.5571	0.119446	0.305117	not sig
ENSG00000009709	PAX7	1	18731283	18731408	Fibroblast.47XYY-Fibroblast.46XY	126	5	20.6592	Intron (ENST00000420770/ENSG00000009709, intron 7 of 8)	Hyper	paired box 7	ENSG00000009709.GeneBody	GeneBody	Fibroblast	no
ENSG00000010295	IFFO1	12	6556340	6556400	Fibroblast.47XYY-Fibroblast.46XY	61	12	53.703	Promoter (<=1kb)	Hyper	intermediate filament family orphan 1	ENSG00000010295.Promoter	Promoter	Fibroblast	no		2111.29	-0.411781	0.163518	-2.51827	0.0117933	0.0566465	not sig
ENSG00000011105	TSPAN9	12	3237561	3237632	Fibroblast.47XYY-Fibroblast.46XY	72	4	-20.1349	Intron (ENST00000537971/ENSG00000011105, intron 2 of 7)	Hypo	tetraspanin 9	ENSG00000011105.GeneBody	GeneBody	Fibroblast	no		1272.45	0.196713	0.196675	1.00019	0.317218	0.558238	not sig
ENSG00000014164	ZC3H3	8	143481605	143481685	Fibroblast.47XYY-Fibroblast.46XY	81	8	-36.0641	Intron (ENST00000262577/ENSG00000014164, intron 4 of 11)	Hypo	zinc finger CCCH-type containing 3	ENSG00000014164.GeneBody	GeneBody	Fibroblast	no		725.295	-0.125286	0.184247	-0.679988	0.496512	0.712175	not sig
ENSG00000014216	CAPN1	11	65182723	65182889	Fibroblast.47XYY-Fibroblast.46XY	167	12	68.5035	Promoter (<=1kb)	Hyper	calpain 1	ENSG00000014216.Promoter	Promoter	Fibroblast	no		7673.55	-0.223687	0.146125	-1.5308	0.12582	0.314347	not sig
ENSG00000016864	GLT8D1	3	52704179	52704287	Fibroblast.47XYY-Fibroblast.46XY	109	11	59.4059	Promoter (<=1kb)	Hyper	glycosyltransferase 8 domain containing 1	ENSG00000016864.Promoter	Promoter	Fibroblast	no		3892.99	0.0389481	0.122165	0.318815	0.749867	0.874227	not sig
ENSG00000019485	PRDM11	11	45155172	45155416	Fibroblast.47XYY-Fibroblast.46XY	245	10	62.822	Intron (ENST00000530656/ENSG00000019485, intron 1 of 6)	Hyper	PR/SET domain 11	ENSG00000019485.GeneBody	GeneBody	Fibroblast	no		302.618	0.459936	0.269876	1.70425	0.0883343	0.249959	not sig
ENSG00000023171	GRAMD1B	11	123577339	123577396	Fibroblast.47XYY-Fibroblast.46XY	58	5	24.5816	5' UTR	Hyper	GRAM domain containing 1B	ENSG00000023171.GeneBody	GeneBody	Fibroblast	no		1365.99	-0.761641	0.185047	-4.11593	3.85615e-05	0.000472891	down
ENSG00000025796	SEC63	6	107952478	107952614	Fibroblast.47XYY-Fibroblast.46XY	137	4	25.187	Intron (ENST00000369002/ENSG00000025796, intron 1 of 20)	Hyper	SEC63 homolog, protein translocation regulator	ENSG00000025796.GeneBody	GeneBody	Fibroblast	no		6638.17	-0.281622	0.196183	-1.43551	0.151143	0.354734	not sig
ENSG00000027075	PRKCH	14	61130634	61130854	Fibroblast.47XYY-Fibroblast.46XY	221	10	49.8696	Distal Intergenic	Hyper	protein kinase C eta	ENSG00000027075.Intergenic	Intergenic	Fibroblast	no
ENSG00000030110	BAK1	6	33573775	33573961	Fibroblast.47XYY-Fibroblast.46XY	187	9	50.5917	3' UTR	Hyper	BCL2 antagonist/killer 1	ENSG00000030110.GeneBody	GeneBody	Fibroblast	no		937.704	-0.0215215	0.205096	-0.104934	0.916428	0.95958	not sig
ENSG00000033627	ATP6V0A1	17	42458286	42458430	Fibroblast.47XYY-Fibroblast.46XY	145	17	94.3309	Promoter (<=1kb)	Hyper	ATPase H+ transporting V0 subunit a1	ENSG00000033627.Promoter	Promoter	Fibroblast	no		1647.59	-0.391435	0.189754	-2.06285	0.0391266	0.13983	not sig
ENSG00000033800	PIAS1	15	68075873	68075991	Fibroblast.47XYY-Fibroblast.46XY	119	4	19.9739	Intron (ENST00000564915/ENSG00000033800, intron 1 of 4)	Hyper	protein inhibitor of activated STAT 1	ENSG00000033800.GeneBody	GeneBody	Fibroblast	no		1249.37	-0.110852	0.112134	-0.988569	0.322874	0.562496	not sig
ENSG00000034053	APBA2	15	28993822	28993907	Fibroblast.47XYY-Fibroblast.46XY	86	4	23.2956	Intron (ENST00000561069/ENSG00000034053, intron 2 of 14)	Hyper	amyloid beta precursor protein binding family A member 2	ENSG00000034053.GeneBody	GeneBody	Fibroblast	no		169.828	6.29667	0.497663	12.6525	1.08412e-36	7.16007e-34	up
ENSG00000034053	APBA2	15	29108179	29108258	Fibroblast.47XYY-Fibroblast.46XY	80	5	25.6569	Intron (ENST00000561069/ENSG00000034053, intron 12 of 14)	Hyper	amyloid beta precursor protein binding family A member 2	ENSG00000034053.GeneBody	GeneBody	Fibroblast	no		169.828	6.29667	0.497663	12.6525	1.08412e-36	7.16007e-34	up
ENSG00000034053	APBA2	15	29020526	29020734	Fibroblast.47XYY-Fibroblast.46XY	209	12	65.9142	Intron (ENST00000561069/ENSG00000034053, intron 3 of 14)	Hyper	amyloid beta precursor protein binding family A member 2	ENSG00000034053.GeneBody	GeneBody	Fibroblast	no		169.828	6.29667	0.497663	12.6525	1.08412e-36	7.16007e-34	up
ENSG00000034053	APBA2	15	29030186	29030318	Fibroblast.47XYY-Fibroblast.46XY	133	12	57.7914	Intron (ENST00000561069/ENSG00000034053, intron 3 of 14)	Hyper	amyloid beta precursor protein binding family A member 2	ENSG00000034053.GeneBody	GeneBody	Fibroblast	no		169.828	6.29667	0.497663	12.6525	1.08412e-36	7.16007e-34	up
ENSG00000034053	APBA2	15	28901075	28903108	Fibroblast.47XYY-Fibroblast.46XY	2034	13	67.4635	Intron (ENST00000561069/ENSG00000034053, intron 1 of 14)	Hyper	amyloid beta precursor protein binding family A member 2	ENSG00000034053.GeneBody	GeneBody	Fibroblast	no		169.828	6.29667	0.497663	12.6525	1.08412e-36	7.16007e-34	up
ENSG00000034053	APBA2	15	28940500	28940699	Fibroblast.47XYY-Fibroblast.46XY	200	9	44.7042	Intron (ENST00000561069/ENSG00000034053, intron 2 of 14)	Hyper	amyloid beta precursor protein binding family A member 2	ENSG00000034053.GeneBody	GeneBody	Fibroblast	no		169.828	6.29667	0.497663	12.6525	1.08412e-36	7.16007e-34	up
ENSG00000034053	APBA2	15	29107024	29107172	Fibroblast.47XYY-Fibroblast.46XY	149	6	40.163	Intron (ENST00000561069/ENSG00000034053, intron 12 of 14)	Hyper	amyloid beta precursor protein binding family A member 2	ENSG00000034053.GeneBody	GeneBody	Fibroblast	no		169.828	6.29667	0.497663	12.6525	1.08412e-36	7.16007e-34	up
ENSG00000034053	APBA2	15	29010417	29010553	Fibroblast.47XYY-Fibroblast.46XY	137	16	103.644	Intron (ENST00000561069/ENSG00000034053, intron 3 of 14)	Hyper	amyloid beta precursor protein binding family A member 2	ENSG00000034053.GeneBody	GeneBody	Fibroblast	no		169.828	6.29667	0.497663	12.6525	1.08412e-36	7.16007e-34	up
ENSG00000034053	APBA2	15	29017529	29017666	Fibroblast.47XYY-Fibroblast.46XY	138	6	48.8605	Intron (ENST00000561069/ENSG00000034053, intron 3 of 14)	Hyper	amyloid beta precursor protein binding family A member 2	ENSG00000034053.GeneBody	GeneBody	Fibroblast	no		169.828	6.29667	0.497663	12.6525	1.08412e-36	7.16007e-34	up
ENSG00000035141	FAM136A	2	70302329	70302501	Fibroblast.47XYY-Fibroblast.46XY	173	15	87.6322	Promoter (<=1kb)	Hyper	family with sequence similarity 136 member A	ENSG00000035141.Promoter	Promoter	Fibroblast	no		1212.8	-0.171076	0.131561	-1.30035	0.193479	0.414545	not sig
ENSG00000035862	TIMP2	17	78926734	78926872	Fibroblast.47XYY-Fibroblast.46XY	139	14	77.2397	Promoter (1-2kb)	Hyper	TIMP metallopeptidase inhibitor 2	ENSG00000035862.Promoter	Promoter	Fibroblast	no		70554.6	-0.442218	0.1375	-3.21613	0.00129932	0.00967458	not sig
ENSG00000035862	TIMP2	17	78913060	78913177	Fibroblast.47XYY-Fibroblast.46XY	118	6	28.918	Intron (ENST00000536189/ENSG00000035862, intron 1 of 4)	Hyper	TIMP metallopeptidase inhibitor 2	ENSG00000035862.GeneBody	GeneBody	Fibroblast	no		70554.6	-0.442218	0.1375	-3.21613	0.00129932	0.00967458	not sig
ENSG00000035862	TIMP2	17	78922538	78922675	Fibroblast.47XYY-Fibroblast.46XY	138	14	70.7207	Promoter (<=1kb)	Hyper	TIMP metallopeptidase inhibitor 2	ENSG00000035862.Promoter	Promoter	Fibroblast	no		70554.6	-0.442218	0.1375	-3.21613	0.00129932	0.00967458	not sig
ENSG00000036257	CUL3	2	224624553	224624658	Fibroblast.47XYY-Fibroblast.46XY	106	6	40.6111	Distal Intergenic	Hyper	cullin 3	ENSG00000036257.Intergenic	Intergenic	Fibroblast	no		2857.51	-0.102833	0.203633	-0.504992	0.613565	0.792201	not sig
ENSG00000036448	MYOM2	8	2047734	2047877	Fibroblast.47XYY-Fibroblast.46XY	144	4	23.3406	Promoter (2-3kb)	Hyper	myomesin 2	ENSG00000036448.Promoter	Promoter	Fibroblast	no		56.4293	1.50484	0.221277	6.8007	1.04113e-11	5.41428e-10	up
ENSG00000036549	ZZZ3	1	77688014	77688149	Fibroblast.47XYY-Fibroblast.46XY	136	20	130.847	Distal Intergenic	Hyper	zinc finger ZZ-type containing 3	ENSG00000036549.Intergenic	Intergenic	Fibroblast	no		2444.93	0.00288171	0.15576	0.0185009	0.985239	0.992528	not sig
ENSG00000039068	CDH1	16	68762629	68762765	Fibroblast.47XYY-Fibroblast.46XY	137	8	60.2517	Promoter (<=1kb)	Hyper	cadherin 1	ENSG00000039068.Promoter	Promoter	Fibroblast	no		34.368	-1.90698	0.448161	-4.25511	2.08944e-05	0.000275443	down
ENSG00000039139	DNAH5	5	13794693	13794823	Fibroblast.47XYY-Fibroblast.46XY	131	11	45.8812	Intron (ENST00000265104/ENSG00000039139, intron 47 of 78)	Hyper	dynein axonemal heavy chain 5	ENSG00000039139.GeneBody	GeneBody	Fibroblast	no		75.0769	-0.673406	0.150856	-4.46389	8.04832e-06	0.000119182	down
ENSG00000040608	RTN4R	22	20230011	20230188	Fibroblast.47XYY-Fibroblast.46XY	178	15	85.9324	Distal Intergenic	Hyper	reticulon 4 receptor	ENSG00000040608.Intergenic	Intergenic	Fibroblast	no
ENSG00000040608	RTN4R	22	20230379	20230464	Fibroblast.47XYY-Fibroblast.46XY	86	6	26.6189	Distal Intergenic	Hyper	reticulon 4 receptor	ENSG00000040608.Intergenic	Intergenic	Fibroblast	no
ENSG00000046889	PREX2	8	67964949	67965042	Fibroblast.47XYY-Fibroblast.46XY	94	4	18.9118	Intron (ENST00000288368/ENSG00000046889, intron 1 of 39)	Hyper	phosphatidylinositol-3,4,5-trisphosphate dependent Rac exchange factor 2	ENSG00000046889.GeneBody	GeneBody	Fibroblast	no		20.3901	1.80954	0.971072	1.86345	0.0623993	0.196059	not sig
ENSG00000048545	GUCA1A	6	42166227	42166318	Fibroblast.47XYY-Fibroblast.46XY	92	13	53.8594	Intron (ENST00000418175/ENSG00000287363, intron 2 of 3)	Hyper	guanylate cyclase activator 1A	ENSG00000048545.GeneBody	GeneBody	Fibroblast	no
ENSG00000049323	LTBP1	2	33277989	33278127	Fibroblast.47XYY-Fibroblast.46XY	139	9	48.5135	Promoter (2-3kb)	Hyper	latent transforming growth factor beta binding protein 1	ENSG00000049323.Promoter	Promoter	Fibroblast	no		15836.2	0.682758	0.210446	3.24434	0.00117722	0.00893162	up
ENSG00000049540	ELN	7	74043369	74043480	Fibroblast.47XYY-Fibroblast.46XY	112	12	-67.9169	Promoter (<=1kb)	Hypo	elastin	ENSG00000049540.Promoter	Promoter	Fibroblast	no		38300.1	-2.37385	0.278471	-8.52457	1.53378e-17	1.77717e-15	down
ENSG00000049540	ELN	7	74010615	74010678	Fibroblast.47XYY-Fibroblast.46XY	64	10	-44.2522	Distal Intergenic	Hypo	elastin	ENSG00000049540.Intergenic	Intergenic	Fibroblast	no		38300.1	-2.37385	0.278471	-8.52457	1.53378e-17	1.77717e-15	down
ENSG00000050767	COL23A1	5	178530565	178530696	Fibroblast.47XYY-Fibroblast.46XY	132	5	23.3827	Intron (ENST00000390654/ENSG00000050767, intron 2 of 28)	Hyper	collagen type XXIII alpha 1 chain	ENSG00000050767.GeneBody	GeneBody	Fibroblast	no		218.775	7.4175	2.11441	3.50807	0.000451375	0.00399345	up
ENSG00000050767	COL23A1	5	178541358	178541416	Fibroblast.47XYY-Fibroblast.46XY	59	5	22.0361	Intron (ENST00000390654/ENSG00000050767, intron 2 of 28)	Hyper	collagen type XXIII alpha 1 chain	ENSG00000050767.GeneBody	GeneBody	Fibroblast	no		218.775	7.4175	2.11441	3.50807	0.000451375	0.00399345	up
ENSG00000050767	COL23A1	5	178286541	178286676	Fibroblast.47XYY-Fibroblast.46XY	136	13	57.985	Intron (ENST00000390654/ENSG00000050767, intron 5 of 28)	Hyper	collagen type XXIII alpha 1 chain	ENSG00000050767.GeneBody	GeneBody	Fibroblast	no		218.775	7.4175	2.11441	3.50807	0.000451375	0.00399345	up
ENSG00000052850	ALX4	11	44319021	44319164	Fibroblast.47XYY-Fibroblast.46XY	144	7	34.9906	Distal Intergenic	Hyper	ALX homeobox 4	ENSG00000052850.Intergenic	Intergenic	Fibroblast	no		93.4443	0.84272	1.16	0.726485	0.467541	0.689128	not sig
ENSG00000053900	ANAPC4	4	25376357	25376410	Fibroblast.47XYY-Fibroblast.46XY	54	12	54.3198	Promoter (<=1kb)	Hyper	anaphase promoting complex subunit 4	ENSG00000053900.Promoter	Promoter	Fibroblast	no		1264.8	-0.13396	0.118509	-1.13038	0.258317	0.49408	not sig
ENSG00000053900	ANAPC4	4	25376215	25376305	Fibroblast.47XYY-Fibroblast.46XY	91	5	22.9864	Promoter (<=1kb)	Hyper	anaphase promoting complex subunit 4	ENSG00000053900.Promoter	Promoter	Fibroblast	no		1264.8	-0.13396	0.118509	-1.13038	0.258317	0.49408	not sig
ENSG00000053918	KCNQ1	11	2529307	2529394	Fibroblast.47XYY-Fibroblast.46XY	88	8	30.8118	Intron (ENST00000496887/ENSG00000053918, intron 3 of 6)	Hyper	potassium voltage-gated channel subfamily Q member 1	ENSG00000053918.GeneBody	GeneBody	Fibroblast	no
ENSG00000053918	KCNQ1	11	2791298	2791473	Fibroblast.47XYY-Fibroblast.46XY	176	15	93.6211	Intron (ENST00000155840/ENSG00000053918, intron 15 of 15)	Hyper	potassium voltage-gated channel subfamily Q member 1	ENSG00000053918.GeneBody	GeneBody	Fibroblast	no
ENSG00000053918	KCNQ1	11	2535864	2536003	Fibroblast.47XYY-Fibroblast.46XY	140	6	28.9987	Intron (ENST00000496887/ENSG00000053918, intron 3 of 6)	Hyper	potassium voltage-gated channel subfamily Q member 1	ENSG00000053918.GeneBody	GeneBody	Fibroblast	no
ENSG00000054219	LY75	2	159921941	159922015	Fibroblast.47XYY-Fibroblast.46XY	75	11	46.5466	Distal Intergenic	Hyper	lymphocyte antigen 75	ENSG00000054219.Intergenic	Intergenic	Fibroblast	no
ENSG00000054611	TBC1D22A	22	46816155	46816305	Fibroblast.47XYY-Fibroblast.46XY	151	6	43.1055	Intron (ENST00000380995/ENSG00000054611, intron 5 of 13)	Hyper	TBC1 domain family member 22A	ENSG00000054611.GeneBody	GeneBody	Fibroblast	no		1182.66	0.00120052	0.153444	0.00782386	0.993758	0.996945	not sig
ENSG00000054803	CBLN4	20	55930672	55930841	Fibroblast.47XYY-Fibroblast.46XY	170	10	52.3324	Distal Intergenic	Hyper	cerebellin 4 precursor	ENSG00000054803.Intergenic	Intergenic	Fibroblast	no
ENSG00000055118	KCNH2	7	150946489	150946579	Fibroblast.47XYY-Fibroblast.46XY	91	14	64.3483	Intron (ENST00000330883/ENSG00000055118, intron 10 of 10)	Hyper	potassium voltage-gated channel subfamily H member 2	ENSG00000055118.GeneBody	GeneBody	Fibroblast	no
ENSG00000055118	KCNH2	7	150976003	150976104	Fibroblast.47XYY-Fibroblast.46XY	102	4	22.1912	Promoter (2-3kb)	Hyper	potassium voltage-gated channel subfamily H member 2	ENSG00000055118.Promoter	Promoter	Fibroblast	no
ENSG00000055483	USP36	17	78798696	78798771	Fibroblast.47XYY-Fibroblast.46XY	76	10	46.1508	Promoter (<=1kb)	Hyper	ubiquitin specific peptidase 36	ENSG00000055483.Promoter	Promoter	Fibroblast	no		2234.37	-0.0507194	0.194623	-0.260604	0.794398	0.898237	not sig
ENSG00000055483	USP36	17	78806168	78806248	Fibroblast.47XYY-Fibroblast.46XY	81	9	31.5429	Exon (ENST00000589225/ENSG00000055483, exon 15 of 21)	Hyper	ubiquitin specific peptidase 36	ENSG00000055483.GeneBody	GeneBody	Fibroblast	no		2234.37	-0.0507194	0.194623	-0.260604	0.794398	0.898237	not sig
ENSG00000057468	MSH4	1	75842673	75842788	Fibroblast.47XYY-Fibroblast.46XY	116	12	59.853	Intron (ENST00000263187/ENSG00000057468, intron 7 of 19)	Hyper	mutS homolog 4	ENSG00000057468.GeneBody	GeneBody	Fibroblast	no
ENSG00000057593	F7	13	113105128	113105277	Fibroblast.47XYY-Fibroblast.46XY	150	6	31.2587	Promoter (<=1kb)	Hyper	coagulation factor VII	ENSG00000057593.Promoter	Promoter	Fibroblast	no
ENSG00000058085	LAMC2	1	183215301	183215395	Fibroblast.47XYY-Fibroblast.46XY	95	9	-34.4291	Intron (ENST00000493293/ENSG00000058085, intron 2 of 21)	Hypo	laminin subunit gamma 2	ENSG00000058085.GeneBody	GeneBody	Fibroblast	no		211.334	-0.194553	0.143222	-1.3584	0.174336	0.388988	not sig
ENSG00000058668	ATP2B4	1	203625044	203625183	Fibroblast.47XYY-Fibroblast.46XY	140	14	90.0823	Promoter (1-2kb)	Hyper	ATPase plasma membrane Ca2+ transporting 4	ENSG00000058668.Promoter	Promoter	Fibroblast	no		26130.4	0.267158	0.129535	2.06243	0.0391665	0.1399	not sig
ENSG00000059122	FLYWCH1	16	2906331	2906466	Fibroblast.47XYY-Fibroblast.46XY	136	8	67.2332	Distal Intergenic	Hyper	FLYWCH-type zinc finger 1	ENSG00000059122.Intergenic	Intergenic	Fibroblast	no		1639.23	-0.133719	0.165807	-0.80647	0.419972	0.653945	not sig
ENSG00000059573	ALDH18A1	10	95606742	95606904	Fibroblast.47XYY-Fibroblast.46XY	163	6	43.4793	3' UTR	Hyper	aldehyde dehydrogenase 18 family member A1	ENSG00000059573.GeneBody	GeneBody	Fibroblast	no		5669.8	0.0418749	0.12039	0.347827	0.72797	0.860454	not sig
ENSG00000059728	MXD1	2	69946300	69946425	Fibroblast.47XYY-Fibroblast.46XY	126	8	48.7711	Distal Intergenic	Hyper	MAX dimerization protein 1	ENSG00000059728.Intergenic	Intergenic	Fibroblast	no		348.7	-0.152218	0.114888	-1.32492	0.185196	0.403473	not sig
ENSG00000060656	PTPRU	1	29311559	29311665	Fibroblast.47XYY-Fibroblast.46XY	107	10	54.8962	Promoter (<=1kb)	Hyper	protein tyrosine phosphatase receptor type U	ENSG00000060656.Promoter	Promoter	Fibroblast	no		1112.1	0.763112	0.277338	2.75156	0.00593121	0.0332113	up
ENSG00000061987	MON2	12	62468196	62468331	Fibroblast.47XYY-Fibroblast.46XY	136	14	109.64	Promoter (1-2kb)	Hyper	MON2 homolog, regulator of endosome-to-Golgi trafficking	ENSG00000061987.Promoter	Promoter	Fibroblast	no		3599.39	-0.0615792	0.166794	-0.369194	0.711983	0.851049	not sig
ENSG00000062194	GPBP1	5	57179690	57179892	Fibroblast.47XYY-Fibroblast.46XY	203	10	60.5937	Intron (ENST00000424459/ENSG00000062194, intron 2 of 12)	Hyper	GC-rich promoter binding protein 1	ENSG00000062194.GeneBody	GeneBody	Fibroblast	no		2154.33	0.0293993	0.181425	0.162046	0.871269	0.936343	not sig
ENSG00000063438	AHRR	5	369481	369534	Fibroblast.47XYY-Fibroblast.46XY	54	8	-34.6022	3' UTR	Hypo	aryl hydrocarbon receptor repressor	ENSG00000063438.GeneBody	GeneBody	Fibroblast	no		144.89	0.275383	0.207022	1.33021	0.183448	0.401071	not sig
ENSG00000064270	ATP2C2	16	84430215	84430307	Fibroblast.47XYY-Fibroblast.46XY	93	12	66.083	Intron (ENST00000416219/ENSG00000064270, intron 11 of 27)	Hyper	ATPase secretory pathway Ca2+ transporting 2	ENSG00000064270.GeneBody	GeneBody	Fibroblast	no
ENSG00000064490	RFXANK	19	19197657	19197718	Fibroblast.47XYY-Fibroblast.46XY	62	4	20.1884	Promoter (<=1kb)	Hyper	regulatory factor X associated ankyrin containing protein	ENSG00000064490.Promoter	Promoter	Fibroblast	no		780.446	0.0454394	0.0818772	0.554971	0.578915	0.769459	not sig
ENSG00000064547	LPAR2	19	19629081	19629217	Fibroblast.47XYY-Fibroblast.46XY	137	19	-107.698	Promoter (<=1kb)	Hypo	lysophosphatidic acid receptor 2	ENSG00000064547.Promoter	Promoter	Fibroblast	no		98.4456	-0.243588	0.303961	-0.801381	0.422911	0.656509	not sig
ENSG00000064655	EYA2	20	46989367	46989562	Fibroblast.47XYY-Fibroblast.46XY	196	19	94.2328	Promoter (<=1kb)	Hyper	EYA transcriptional coactivator and phosphatase 2	ENSG00000064655.Promoter	Promoter	Fibroblast	no		133.246	-0.993336	0.601588	-1.65119	0.0986996	0.270202	not sig
ENSG00000064687	ABCA7	19	1041762	1042187	Fibroblast.47XYY-Fibroblast.46XY	426	34	213.897	Promoter (<=1kb)	Hyper	ATP binding cassette subfamily A member 7	ENSG00000064687.Promoter	Promoter	Fibroblast	no		181.689	-1.73834	0.265719	-6.54201	6.06956e-11	2.74565e-09	down
ENSG00000064932	SBNO2	19	1154628	1154762	Fibroblast.47XYY-Fibroblast.46XY	135	9	54.072	Promoter (<=1kb)	Hyper	strawberry notch homolog 2	ENSG00000064932.Promoter	Promoter	Fibroblast	no		2553.67	0.21126	0.172274	1.2263	0.220087	0.449393	not sig
ENSG00000065000	AP3D1	19	2131031	2131164	Fibroblast.47XYY-Fibroblast.46XY	134	5	24.0156	Promoter (<=1kb)	Hyper	adaptor related protein complex 3 subunit delta 1	ENSG00000065000.Promoter	Promoter	Fibroblast	no		9546.14	-0.201705	0.173006	-1.16589	0.24366	0.476957	not sig
ENSG00000065154	OAT	10	124417376	124417575	Fibroblast.47XYY-Fibroblast.46XY	200	12	60.2911	Promoter (<=1kb)	Hyper	ornithine aminotransferase	ENSG00000065154.Promoter	Promoter	Fibroblast	no		6926.44	-0.209945	0.0504331	-4.16285	3.14298e-05	0.000392977	not sig
ENSG00000065154	OAT	10	124379698	124379847	Fibroblast.47XYY-Fibroblast.46XY	150	10	54.2546	Distal Intergenic	Hyper	ornithine aminotransferase	ENSG00000065154.Intergenic	Intergenic	Fibroblast	no		6926.44	-0.209945	0.0504331	-4.16285	3.14298e-05	0.000392977	not sig
ENSG00000065320	NTN1	17	9048748	9048869	Fibroblast.47XYY-Fibroblast.46XY	122	4	22.6843	Intron (ENST00000173229/ENSG00000065320, intron 2 of 6)	Hyper	netrin 1	ENSG00000065320.GeneBody	GeneBody	Fibroblast	no		182.9	3.4444	0.551919	6.24076	4.35439e-10	1.66716e-08	up
ENSG00000065320	NTN1	17	9170273	9170449	Fibroblast.47XYY-Fibroblast.46XY	177	7	46.6102	Intron (ENST00000173229/ENSG00000065320, intron 3 of 6)	Hyper	netrin 1	ENSG00000065320.GeneBody	GeneBody	Fibroblast	no		182.9	3.4444	0.551919	6.24076	4.35439e-10	1.66716e-08	up
ENSG00000065357	DGKA	12	55936049	55936119	Fibroblast.47XYY-Fibroblast.46XY	71	5	-24.7563	Promoter (<=1kb)	Hypo	diacylglycerol kinase alpha	ENSG00000065357.Promoter	Promoter	Fibroblast	no		2598.36	0.0725978	0.0998738	0.726895	0.46729	0.689128	not sig
ENSG00000065457	ADAT1	16	75589740	75589844	Fibroblast.47XYY-Fibroblast.46XY	105	12	56.7896	Intron (ENST00000564489/ENSG00000259992, intron 3 of 7)	Hyper	adenosine deaminase tRNA specific 1	ENSG00000065457.GeneBody	GeneBody	Fibroblast	no		876.394	-0.434394	0.190157	-2.28439	0.0223485	0.0923371	not sig
ENSG00000065675	PRKCQ	10	6562391	6562466	Fibroblast.47XYY-Fibroblast.46XY	76	7	31.8412	Intron (ENST00000397176/ENSG00000065675, intron 1 of 16)	Hyper	protein kinase C theta	ENSG00000065675.GeneBody	GeneBody	Fibroblast	no
ENSG00000065717	TLE2	19	3022385	3022482	Fibroblast.47XYY-Fibroblast.46XY	98	4	27.1868	Promoter (1-2kb)	Hyper	TLE family member 2, transcriptional corepressor	ENSG00000065717.Promoter	Promoter	Fibroblast	no		176.344	-0.541202	0.41512	-1.30372	0.192328	0.412948	not sig
ENSG00000065809	FAM107B	10	14581085	14581230	Fibroblast.47XYY-Fibroblast.46XY	146	17	-61.2875	Intron (ENST00000181796/ENSG00000065809, intron 2 of 4)	Hypo	family with sequence similarity 107 member B	ENSG00000065809.GeneBody	GeneBody	Fibroblast	no		671.337	-0.0340082	0.183302	-0.185531	0.852813	0.927478	not sig
ENSG00000066032	CTNNA2	2	80412768	80412882	Fibroblast.47XYY-Fibroblast.46XY	115	5	23.8847	Intron (ENST00000466387/ENSG00000066032, intron 12 of 21)	Hyper	catenin alpha 2	ENSG00000066032.GeneBody	GeneBody	Fibroblast	no
ENSG00000066248	NGEF	2	232902721	232902863	Fibroblast.47XYY-Fibroblast.46XY	143	10	52.4216	Promoter (1-2kb)	Hyper	neuronal guanine nucleotide exchange factor	ENSG00000066248.Promoter	Promoter	Fibroblast	no
ENSG00000066248	NGEF	2	232885683	232885771	Fibroblast.47XYY-Fibroblast.46XY	89	7	36.2636	Promoter (<=1kb)	Hyper	neuronal guanine nucleotide exchange factor	ENSG00000066248.Promoter	Promoter	Fibroblast	no
ENSG00000066248	NGEF	2	232899304	232899436	Fibroblast.47XYY-Fibroblast.46XY	133	6	27.8596	Promoter (2-3kb)	Hyper	neuronal guanine nucleotide exchange factor	ENSG00000066248.Promoter	Promoter	Fibroblast	no
ENSG00000066427	ATXN3	14	92107049	92107184	Fibroblast.47XYY-Fibroblast.46XY	136	16	78.044	Promoter (<=1kb)	Hyper	ataxin 3	ENSG00000066427.Promoter	Promoter	Fibroblast	no		1044.43	0.126697	0.170425	0.743419	0.457228	0.681507	not sig
ENSG00000066468	FGFR2	10	121531926	121532033	Fibroblast.47XYY-Fibroblast.46XY	108	6	31.1409	Promoter (<=1kb)	Hyper	fibroblast growth factor receptor 2	ENSG00000066468.Promoter	Promoter	Fibroblast	no		339.668	-0.410512	0.304886	-1.34645	0.178158	0.394252	not sig
ENSG00000066629	EML1	14	99745307	99745359	Fibroblast.47XYY-Fibroblast.46XY	53	5	-25.2115	Intron (ENST00000554479/ENSG00000066629, intron 1 of 10)	Hypo	EMAP like 1	ENSG00000066629.GeneBody	GeneBody	Fibroblast	no		2214.13	0.711499	0.215244	3.30554	0.00094792	0.00744416	up
ENSG00000066735	KIF26A	14	104176421	104176524	Fibroblast.47XYY-Fibroblast.46XY	104	11	53.6521	Exon (ENST00000423312/ENSG00000066735, exon 12 of 15)	Hyper	kinesin family member 26A	ENSG00000066735.GeneBody	GeneBody	Fibroblast	no		25.5393	5.33956	1.90859	2.79764	0.00514774	0.0294995	up
ENSG00000066813	ACSM2B	16	20543051	20543204	Fibroblast.47XYY-Fibroblast.46XY	154	8	43.8906	Promoter (1-2kb)	Hyper	acyl-CoA synthetase medium chain family member 2B	ENSG00000066813.Promoter	Promoter	Fibroblast	no
ENSG00000066933	MYO9A	15	72050329	72050389	Fibroblast.47XYY-Fibroblast.46XY	61	5	23.2782	Intron (ENST00000356056/ENSG00000066933, intron 1 of 41)	Hyper	myosin IXA	ENSG00000066933.GeneBody	GeneBody	Fibroblast	no		2752.88	-0.232234	0.128138	-1.81238	0.0699275	0.213122	not sig
ENSG00000067208	EVI5	1	92785942	92786140	Fibroblast.47XYY-Fibroblast.46XY	199	21	129.718	Promoter (<=1kb)	Hyper	ecotropic viral integration site 5	ENSG00000067208.Promoter	Promoter	Fibroblast	no		1224.27	0.207189	0.15061	1.37566	0.168926	0.381557	not sig
ENSG00000067840	PDZD4	X	153828655	153828746	Fibroblast.47XYY-Fibroblast.46XY	92	8	-37.427	Promoter (<=1kb)	Hypo	PDZ domain containing 4	ENSG00000067840.Promoter	Promoter	Fibroblast	no	inactive
ENSG00000067842	ATP2B3	X	153532637	153532776	Fibroblast.47XYY-Fibroblast.46XY	140	6	33.3362	Promoter (<=1kb)	Hyper	ATPase plasma membrane Ca2+ transporting 3	ENSG00000067842.Promoter	Promoter	Fibroblast	no	inactive
ENSG00000067842	ATP2B3	X	153543978	153545125	Fibroblast.47XYY-Fibroblast.46XY	1148	7	41.6327	Intron (ENST00000349466/ENSG00000067842, intron 6 of 20)	Hyper	ATPase plasma membrane Ca2+ transporting 3	ENSG00000067842.GeneBody	GeneBody	Fibroblast	no	inactive
ENSG00000067955	CBFB	16	67053618	67053757	Fibroblast.47XYY-Fibroblast.46XY	140	4	25.6805	Intron (ENST00000651988/ENSG00000067955, intron 3 of 5)	Hyper	core-binding factor subunit beta	ENSG00000067955.GeneBody	GeneBody	Fibroblast	no		2870.94	-0.610788	0.189706	-3.21965	0.00128348	0.0095891	down
ENSG00000068024	HDAC4	2	239156624	239156684	Fibroblast.47XYY-Fibroblast.46XY	61	4	-17.2267	Promoter (1-2kb)	Hypo	histone deacetylase 4	ENSG00000068024.Promoter	Promoter	Fibroblast	no		725.148	-0.218215	0.184576	-1.18225	0.237108	0.469137	not sig
ENSG00000068024	HDAC4	2	239081953	239082012	Fibroblast.47XYY-Fibroblast.46XY	60	6	-23.4728	Promoter (<=1kb)	Hypo	histone deacetylase 4	ENSG00000068024.Promoter	Promoter	Fibroblast	no		725.148	-0.218215	0.184576	-1.18225	0.237108	0.469137	not sig
ENSG00000068323	TFE3	X	49041092	49041226	Fibroblast.47XYY-Fibroblast.46XY	135	14	87.6403	Promoter (1-2kb)	Hyper	transcription factor binding to IGHM enhancer 3	ENSG00000068323.Promoter	Promoter	Fibroblast	no	inactive	5828.31	-0.202523	0.11098	-1.82485	0.068023	0.2092	not sig
ENSG00000068383	INPP5A	10	132575068	132575196	Fibroblast.47XYY-Fibroblast.46XY	129	8	-44.3843	Intron (ENST00000368594/ENSG00000068383, intron 1 of 15)	Hypo	inositol polyphosphate-5-phosphatase A	ENSG00000068383.GeneBody	GeneBody	Fibroblast	no		1145.38	0.153745	0.138475	1.11027	0.266882	0.503676	not sig
ENSG00000068654	POLR1A	2	85984428	85984631	Fibroblast.47XYY-Fibroblast.46XY	204	27	137.89	Distal Intergenic	Hyper	RNA polymerase I subunit A	ENSG00000068654.Intergenic	Intergenic	Fibroblast	no		2923.82	-0.345039	0.145124	-2.37755	0.0174282	0.0763041	not sig
ENSG00000068654	POLR1A	2	86000430	86000584	Fibroblast.47XYY-Fibroblast.46XY	155	7	28.5473	Distal Intergenic	Hyper	RNA polymerase I subunit A	ENSG00000068654.Intergenic	Intergenic	Fibroblast	no		2923.82	-0.345039	0.145124	-2.37755	0.0174282	0.0763041	not sig
ENSG00000068745	IP6K2	3	48709054	48709256	Fibroblast.47XYY-Fibroblast.46XY	203	4	17.8975	Intron (ENST00000328631/ENSG00000068745, intron 1 of 5)	Hyper	inositol hexakisphosphate kinase 2	ENSG00000068745.GeneBody	GeneBody	Fibroblast	no		1884.67	0.0393038	0.100478	0.391168	0.695673	0.841805	not sig
ENSG00000069020	MAST4	5	66883588	66883722	Fibroblast.47XYY-Fibroblast.46XY	135	10	49.3116	Intron (ENST00000403625/ENSG00000069020, intron 3 of 28)	Hyper	microtubule associated serine/threonine kinase family member 4	ENSG00000069020.GeneBody	GeneBody	Fibroblast	no		613.96	-0.253641	0.132604	-1.91277	0.0557778	0.181158	not sig
ENSG00000069188	SDK2	17	73642970	73643055	Fibroblast.47XYY-Fibroblast.46XY	86	17	-72.5619	Promoter (1-2kb)	Hypo	sidekick cell adhesion molecule 2	ENSG00000069188.Promoter	Promoter	Fibroblast	no
ENSG00000069424	KCNAB2	1	6097933	6098003	Fibroblast.47XYY-Fibroblast.46XY	71	9	-40.7366	3' UTR	Hypo	potassium voltage-gated channel subfamily A regulatory beta subunit 2	ENSG00000069424.GeneBody	GeneBody	Fibroblast	no		331.92	-0.163429	0.165011	-0.990413	0.321972	0.561988	not sig
ENSG00000069424	KCNAB2	1	6084541	6084672	Fibroblast.47XYY-Fibroblast.46XY	132	15	62.2672	Promoter (2-3kb)	Hyper	potassium voltage-gated channel subfamily A regulatory beta subunit 2	ENSG00000069424.Promoter	Promoter	Fibroblast	no		331.92	-0.163429	0.165011	-0.990413	0.321972	0.561988	not sig
ENSG00000069482	GAL	11	68681085	68681161	Fibroblast.47XYY-Fibroblast.46XY	77	6	26.7774	Promoter (2-3kb)	Hyper	galanin and GMAP prepropeptide	ENSG00000069482.Promoter	Promoter	Fibroblast	no		37.6205	4.13835	0.620425	6.67019	2.5548e-11	1.24067e-09	up
ENSG00000069956	MAPK6	15	52022831	52023031	Fibroblast.47XYY-Fibroblast.46XY	201	14	70.255	Promoter (1-2kb)	Hyper	mitogen-activated protein kinase 6	ENSG00000069956.Promoter	Promoter	Fibroblast	no		4335.17	0.0408973	0.192513	0.21244	0.831764	0.915259	not sig
ENSG00000070182	SPTB	14	64760318	64760429	Fibroblast.47XYY-Fibroblast.46XY	112	6	27.623	Promoter (2-3kb)	Hyper	spectrin beta, erythrocytic	ENSG00000070182.Promoter	Promoter	Fibroblast	no
ENSG00000070404	FSTL3	19	684613	684905	Fibroblast.47XYY-Fibroblast.46XY	293	25	139.447	Distal Intergenic	Hyper	follistatin like 3	ENSG00000070404.Intergenic	Intergenic	Fibroblast	no		3136.12	-0.387548	0.264305	-1.46629	0.14257	0.341448	not sig
ENSG00000070423	RNF126	19	659114	659357	Fibroblast.47XYY-Fibroblast.46XY	244	28	230.15	Promoter (2-3kb)	Hyper	ring finger protein 126	ENSG00000070423.Promoter	Promoter	Fibroblast	no		1107.8	-0.234269	0.168022	-1.39427	0.163235	0.373408	not sig
ENSG00000070423	RNF126	19	661888	662040	Fibroblast.47XYY-Fibroblast.46XY	153	24	113.557	Promoter (<=1kb)	Hyper	ring finger protein 126	ENSG00000070423.Promoter	Promoter	Fibroblast	no		1107.8	-0.234269	0.168022	-1.39427	0.163235	0.373408	not sig
ENSG00000070444	MNT	17	2404094	2405009	Fibroblast.47XYY-Fibroblast.46XY	916	15	95.0157	Promoter (2-3kb)	Hyper	MAX network transcriptional repressor	ENSG00000070444.Promoter	Promoter	Fibroblast	no		1461.17	0.224332	0.227028	0.988125	0.323091	0.562761	not sig
ENSG00000070495	JMJD6	17	76716698	76716811	Fibroblast.47XYY-Fibroblast.46XY	114	4	37.5901	3' UTR	Hyper	jumonji domain containing 6, arginine demethylase and lysine hydroxylase	ENSG00000070495.GeneBody	GeneBody	Fibroblast	no		1520.93	0.191194	0.140789	1.35802	0.174459	0.389195	not sig
ENSG00000070601	FRMPD1	9	37698898	37699034	Fibroblast.47XYY-Fibroblast.46XY	137	8	37.9896	Intron (ENST00000377765/ENSG00000070601, intron 2 of 15)	Hyper	FERM and PDZ domain containing 1	ENSG00000070601.GeneBody	GeneBody	Fibroblast	no
ENSG00000070614	NDST1	5	150564455	150564562	Fibroblast.47XYY-Fibroblast.46XY	108	6	29.1999	Distal Intergenic	Hyper	N-deacetylase and N-sulfotransferase 1	ENSG00000070614.Intergenic	Intergenic	Fibroblast	no		18273.4	-0.659056	0.214928	-3.06641	0.00216649	0.0147587	down
ENSG00000070886	EPHA8	1	22573950	22574071	Fibroblast.47XYY-Fibroblast.46XY	122	10	67.914	Intron (ENST00000166244/ENSG00000070886, intron 2 of 16)	Hyper	EPH receptor A8	ENSG00000070886.GeneBody	GeneBody	Fibroblast	no
ENSG00000071054	MAP4K4	2	101806598	101806673	Fibroblast.47XYY-Fibroblast.46XY	76	11	53.4342	Intron (ENST00000427603/ENSG00000071054, intron 4 of 4)	Hyper	mitogen-activated protein kinase kinase kinase kinase 4	ENSG00000071054.GeneBody	GeneBody	Fibroblast	no		18319.3	-0.0488273	0.177331	-0.275346	0.78305	0.892525	not sig
ENSG00000071127	WDR1	4	10096875	10097091	Fibroblast.47XYY-Fibroblast.46XY	217	8	56.724	Promoter (<=1kb)	Hyper	WD repeat domain 1	ENSG00000071127.Promoter	Promoter	Fibroblast	no		33082.5	-0.187177	0.157874	-1.18562	0.235774	0.468181	not sig
ENSG00000071242	RPS6KA2	6	166557314	166557386	Fibroblast.47XYY-Fibroblast.46XY	73	8	-36.0182	Intron (ENST00000265678/ENSG00000071242, intron 1 of 20)	Hypo	ribosomal protein S6 kinase A2	ENSG00000071242.GeneBody	GeneBody	Fibroblast	no		5040.1	-0.0444254	0.249621	-0.177972	0.858745	0.93076	not sig
ENSG00000071564	TCF3	19	1657844	1657939	Fibroblast.47XYY-Fibroblast.46XY	96	8	41.7166	Distal Intergenic	Hyper	transcription factor 3	ENSG00000071564.Intergenic	Intergenic	Fibroblast	no		3579.8	0.189265	0.122398	1.54631	0.122031	0.308826	not sig
ENSG00000071564	TCF3	19	1653615	1653712	Fibroblast.47XYY-Fibroblast.46XY	98	13	63.8956	Promoter (<=1kb)	Hyper	transcription factor 3	ENSG00000071564.Promoter	Promoter	Fibroblast	no		3579.8	0.189265	0.122398	1.54631	0.122031	0.308826	not sig
ENSG00000071626	DAZAP1	19	1411573	1411747	Fibroblast.47XYY-Fibroblast.46XY	175	11	52.4716	Promoter (1-2kb)	Hyper	DAZ associated protein 1	ENSG00000071626.Promoter	Promoter	Fibroblast	no		4931.87	-0.00679165	0.11974	-0.0567199	0.954768	0.979422	not sig
ENSG00000071626	DAZAP1	19	1411183	1411327	Fibroblast.47XYY-Fibroblast.46XY	145	8	46.0509	Promoter (1-2kb)	Hyper	DAZ associated protein 1	ENSG00000071626.Promoter	Promoter	Fibroblast	no		4931.87	-0.00679165	0.11974	-0.0567199	0.954768	0.979422	not sig
ENSG00000071991	CDH19	18	66545138	66545272	Fibroblast.47XYY-Fibroblast.46XY	135	10	56.0714	Intron (ENST00000262150/ENSG00000071991, intron 5 of 11)	Hyper	cadherin 19	ENSG00000071991.GeneBody	GeneBody	Fibroblast	no
ENSG00000072135	PTPN18	2	130387474	130387697	Fibroblast.47XYY-Fibroblast.46XY	224	6	34.0938	Distal Intergenic	Hyper	protein tyrosine phosphatase non-receptor type 18	ENSG00000072135.Intergenic	Intergenic	Fibroblast	no		1533.37	-0.273009	0.119816	-2.27856	0.0226932	0.0933813	not sig
ENSG00000072163	LIMS2	2	127681370	127681483	Fibroblast.47XYY-Fibroblast.46XY	114	15	66.7875	Promoter (<=1kb)	Hyper	LIM zinc finger domain containing 2	ENSG00000072163.Promoter	Promoter	Fibroblast	no		2753.51	-0.248279	0.317103	-0.782961	0.43365	0.663587	not sig
ENSG00000072182	ASIC4	2	219514715	219514770	Fibroblast.47XYY-Fibroblast.46XY	56	6	26.4349	Promoter (<=1kb)	Hyper	acid sensing ion channel subunit family member 4	ENSG00000072182.Promoter	Promoter	Fibroblast	no
ENSG00000072518	MARK2	11	63869432	63869545	Fibroblast.47XYY-Fibroblast.46XY	114	5	-27.6081	Promoter (<=1kb)	Hypo	microtubule affinity regulating kinase 2	ENSG00000072518.Promoter	Promoter	Fibroblast	no		1441.43	-0.00972831	0.155879	-0.0624093	0.950237	0.976939	not sig
ENSG00000072571	HMMR	5	163469135	163469220	Fibroblast.47XYY-Fibroblast.46XY	86	5	-26.2667	Intron (ENST00000520345/ENSG00000072571, intron 3 of 5)	Hypo	hyaluronan mediated motility receptor	ENSG00000072571.GeneBody	GeneBody	Fibroblast	no		796.688	0.0103933	0.295729	0.0351447	0.971964	0.987743	not sig
ENSG00000072657	TRHDE	12	72131262	72131367	Fibroblast.47XYY-Fibroblast.46XY	106	14	61.1443	Intron (ENST00000550403/ENSG00000139287, intron 4 of 5)	Hyper	thyrotropin releasing hormone degrading enzyme	ENSG00000072657.GeneBody	GeneBody	Fibroblast	no		1352.42	13.0367	0.786746	16.5704	1.13998e-61	3.76448e-58	up
ENSG00000072778	ACADVL	17	7225839	7225923	Fibroblast.47XYY-Fibroblast.46XY	85	5	24.5729	Promoter (1-2kb)	Hyper	acyl-CoA dehydrogenase very long chain	ENSG00000072778.Promoter	Promoter	Fibroblast	no		13347.8	0.0912042	0.128133	0.711795	0.476592	0.696768	not sig
ENSG00000072786	STK10	5	172174724	172174789	Fibroblast.47XYY-Fibroblast.46XY	66	4	-18.6671	Intron (ENST00000176763/ENSG00000072786, intron 1 of 18)	Hypo	serine/threonine kinase 10	ENSG00000072786.GeneBody	GeneBody	Fibroblast	no		3089.22	-0.153741	0.136476	-1.1265	0.259952	0.495843	not sig
ENSG00000072818	ACAP1	17	7342936	7343019	Fibroblast.47XYY-Fibroblast.46XY	84	4	19.2089	Promoter (<=1kb)	Hyper	ArfGAP with coiled-coil, ankyrin repeat and PH domains 1	ENSG00000072818.Promoter	Promoter	Fibroblast	no		95.701	0.555957	0.246207	2.25809	0.0239403	0.0970918	not sig
ENSG00000072858	SIDT1	3	113578203	113578323	Fibroblast.47XYY-Fibroblast.46XY	121	15	62.4345	Intron (ENST00000491730/ENSG00000072858, intron 4 of 5)	Hyper	SID1 transmembrane family member 1	ENSG00000072858.GeneBody	GeneBody	Fibroblast	no
ENSG00000072958	AP1M1	19	16237289	16237428	Fibroblast.47XYY-Fibroblast.46XY	140	7	38.3747	3' UTR	Hyper	adaptor related protein complex 1 subunit mu 1	ENSG00000072958.GeneBody	GeneBody	Fibroblast	no		3395.13	-0.128672	0.125835	-1.02254	0.306524	0.547896	not sig
ENSG00000073050	XRCC1	19	43562995	43563050	Fibroblast.47XYY-Fibroblast.46XY	56	6	24.0021	Promoter (2-3kb)	Hyper	X-ray repair cross complementing 1	ENSG00000073050.Promoter	Promoter	Fibroblast	no		720.847	0.0261971	0.173161	0.151287	0.879749	0.941474	not sig
ENSG00000073060	SCARB1	12	124774157	124774247	Fibroblast.47XYY-Fibroblast.46XY	91	4	19.8526	Distal Intergenic	Hyper	scavenger receptor class B member 1	ENSG00000073060.Intergenic	Intergenic	Fibroblast	no		391.828	0.453671	0.198402	2.28663	0.0222177	0.0919404	not sig
ENSG00000073111	MCM2	3	127601519	127601661	Fibroblast.47XYY-Fibroblast.46XY	143	9	60.7197	Promoter (2-3kb)	Hyper	minichromosome maintenance complex component 2	ENSG00000073111.Promoter	Promoter	Fibroblast	no		1079.11	-0.678431	0.219991	-3.08391	0.00204302	0.0140278	down
ENSG00000073146	MOV10L1	22	50121373	50121495	Fibroblast.47XYY-Fibroblast.46XY	123	6	27.6813	Intron (ENST00000545383/ENSG00000073146, intron 11 of 27)	Hyper	Mov10 like RISC complex RNA helicase 1	ENSG00000073146.GeneBody	GeneBody	Fibroblast	no		61.8714	2.86674	0.5759	4.97784	6.42964e-07	1.25635e-05	up
ENSG00000073464	CLCN4	X	10111387	10111521	Fibroblast.47XYY-Fibroblast.46XY	135	11	-64.2471	Intron (ENST00000380861/ENSG00000047644, intron 9 of 22)	Hypo	chloride voltage-gated channel 4	ENSG00000073464.GeneBody	GeneBody	Fibroblast	no	inactive	116.619	0.934074	0.267694	3.48933	0.000484227	0.00423936	up
ENSG00000073464	CLCN4	X	10111728	10111856	Fibroblast.47XYY-Fibroblast.46XY	129	9	-43.3301	Intron (ENST00000380861/ENSG00000047644, intron 9 of 22)	Hypo	chloride voltage-gated channel 4	ENSG00000073464.GeneBody	GeneBody	Fibroblast	no	inactive	116.619	0.934074	0.267694	3.48933	0.000484227	0.00423936	up
ENSG00000073578	SDHA	5	220972	221108	Fibroblast.47XYY-Fibroblast.46XY	137	14	74.6507	Promoter (2-3kb)	Hyper	succinate dehydrogenase complex flavoprotein subunit A	ENSG00000073578.Promoter	Promoter	Fibroblast	no		309.159	-0.246171	0.14509	-1.69667	0.0897583	0.252581	not sig
ENSG00000073849	ST6GAL1	3	187085771	187085907	Fibroblast.47XYY-Fibroblast.46XY	137	4	22.5128	Distal Intergenic	Hyper	ST6 beta-galactoside alpha-2,6-sialyltransferase 1	ENSG00000073849.Intergenic	Intergenic	Fibroblast	no
ENSG00000073849	ST6GAL1	3	187020019	187021631	Fibroblast.47XYY-Fibroblast.46XY	1613	11	54.4463	Promoter (<=1kb)	Hyper	ST6 beta-galactoside alpha-2,6-sialyltransferase 1	ENSG00000073849.Promoter	Promoter	Fibroblast	no
ENSG00000074047	GLI2	2	120751045	120751163	Fibroblast.47XYY-Fibroblast.46XY	119	4	-20.0042	Intron (ENST00000482119/ENSG00000074047, intron 1 of 3)	Hypo	GLI family zinc finger 2	ENSG00000074047.GeneBody	GeneBody	Fibroblast	no		2408.2	-0.175217	0.223766	-0.783035	0.433607	0.663587	not sig
ENSG00000074047	GLI2	2	120741983	120742206	Fibroblast.47XYY-Fibroblast.46XY	224	20	-111.848	Intron (ENST00000482119/ENSG00000074047, intron 1 of 3)	Hypo	GLI family zinc finger 2	ENSG00000074047.GeneBody	GeneBody	Fibroblast	no		2408.2	-0.175217	0.223766	-0.783035	0.433607	0.663587	not sig
ENSG00000074370	ATP2A3	17	3966978	3967113	Fibroblast.47XYY-Fibroblast.46XY	136	6	28.3138	Promoter (2-3kb)	Hyper	ATPase sarcoplasmic/endoplasmic reticulum Ca2+ transporting 3	ENSG00000074370.Promoter	Promoter	Fibroblast	no		82.2828	0.0687617	0.347024	0.198147	0.84293	0.922928	not sig
ENSG00000074370	ATP2A3	17	3955700	3955782	Fibroblast.47XYY-Fibroblast.46XY	83	7	36.016	Intron (ENST00000309890/ENSG00000074370, intron 1 of 21)	Hyper	ATPase sarcoplasmic/endoplasmic reticulum Ca2+ transporting 3	ENSG00000074370.GeneBody	GeneBody	Fibroblast	no		82.2828	0.0687617	0.347024	0.198147	0.84293	0.922928	not sig
ENSG00000074416	MGLL	3	127791923	127792098	Fibroblast.47XYY-Fibroblast.46XY	176	11	-64.9888	Promoter (<=1kb)	Hypo	monoglyceride lipase	ENSG00000074416.Promoter	Promoter	Fibroblast	no		7057.72	-0.435869	0.0896501	-4.86189	1.16268e-06	2.12419e-05	not sig
ENSG00000074621	SLC24A1	15	65611722	65611805	Fibroblast.47XYY-Fibroblast.46XY	84	7	34.1842	Promoter (<=1kb)	Hyper	solute carrier family 24 member 1	ENSG00000074621.Promoter	Promoter	Fibroblast	no		630.926	-0.0320861	0.110521	-0.290317	0.771574	0.887071	not sig
ENSG00000074706	IPCEF1	6	154168848	154168958	Fibroblast.47XYY-Fibroblast.46XY	111	4	16.9192	Intron (ENST00000524150/ENSG00000112038, intron 2 of 2)	Hyper	interaction protein for cytohesin exchange factors 1	ENSG00000074706.GeneBody	GeneBody	Fibroblast	no
ENSG00000075043	KCNQ2	20	63456705	63456809	Fibroblast.47XYY-Fibroblast.46XY	105	9	45.8317	Promoter (2-3kb)	Hyper	potassium voltage-gated channel subfamily Q member 2	ENSG00000075043.Promoter	Promoter	Fibroblast	no
ENSG00000075239	ACAT1	11	108123107	108123159	Fibroblast.47XYY-Fibroblast.46XY	53	4	19.6092	Promoter (<=1kb)	Hyper	acetyl-CoA acetyltransferase 1	ENSG00000075239.Promoter	Promoter	Fibroblast	no		1740.38	-0.313954	0.105267	-2.98245	0.00285953	0.0185247	not sig
ENSG00000075275	CELSR1	22	46363640	46363813	Fibroblast.47XYY-Fibroblast.46XY	174	9	42.9321	Promoter (2-3kb)	Hyper	cadherin EGF LAG seven-pass G-type receptor 1	ENSG00000075275.Promoter	Promoter	Fibroblast	no		112.565	3.62317	0.520369	6.96268	3.33851e-12	1.86069e-10	up
ENSG00000075275	CELSR1	22	46362217	46362297	Fibroblast.47XYY-Fibroblast.46XY	81	7	35.0825	3' UTR	Hyper	cadherin EGF LAG seven-pass G-type receptor 1	ENSG00000075275.GeneBody	GeneBody	Fibroblast	no		112.565	3.62317	0.520369	6.96268	3.33851e-12	1.86069e-10	up
ENSG00000075275	CELSR1	22	46369548	46369664	Fibroblast.47XYY-Fibroblast.46XY	117	6	27.9549	Promoter (2-3kb)	Hyper	cadherin EGF LAG seven-pass G-type receptor 1	ENSG00000075275.Promoter	Promoter	Fibroblast	no		112.565	3.62317	0.520369	6.96268	3.33851e-12	1.86069e-10	up
ENSG00000075340	ADD2	2	70676670	70676796	Fibroblast.47XYY-Fibroblast.46XY	127	9	53.9954	3' UTR	Hyper	adducin 2	ENSG00000075340.GeneBody	GeneBody	Fibroblast	no		1044.06	2.01526	0.839818	2.39964	0.0164112	0.0728346	not sig
ENSG00000075340	ADD2	2	70667710	70667845	Fibroblast.47XYY-Fibroblast.46XY	136	8	44.6888	Intron (ENST00000403045/ENSG00000075340, intron 15 of 20)	Hyper	adducin 2	ENSG00000075340.GeneBody	GeneBody	Fibroblast	no		1044.06	2.01526	0.839818	2.39964	0.0164112	0.0728346	not sig
ENSG00000075420	FNDC3B	3	172068654	172068713	Fibroblast.47XYY-Fibroblast.46XY	60	5	20.7911	Intron (ENST00000415807/ENSG00000075420, intron 1 of 25)	Hyper	fibronectin type III domain containing 3B	ENSG00000075420.GeneBody	GeneBody	Fibroblast	no		10187.6	-0.0210745	0.114816	-0.183551	0.854366	0.928451	not sig
ENSG00000075426	FOSL2	2	28368943	28368993	Fibroblast.47XYY-Fibroblast.46XY	51	6	27.7842	Distal Intergenic	Hyper	FOS like 2, AP-1 transcription factor subunit	ENSG00000075426.Intergenic	Intergenic	Fibroblast	no		7715.51	0.11232	0.186929	0.600869	0.547928	0.748618	not sig
ENSG00000075618	FSCN1	7	5599115	5599237	Fibroblast.47XYY-Fibroblast.46XY	123	11	-58.6921	Intron (ENST00000382361/ENSG00000075618, intron 1 of 4)	Hypo	fascin actin-bundling protein 1	ENSG00000075618.GeneBody	GeneBody	Fibroblast	no		15471.4	0.0797141	0.12188	0.654037	0.513088	0.725241	not sig
ENSG00000076248	UNG	12	109102333	109102391	Fibroblast.47XYY-Fibroblast.46XY	59	5	27.5896	Intron (ENST00000242576/ENSG00000076248, intron 4 of 6)	Hyper	uracil DNA glycosylase	ENSG00000076248.GeneBody	GeneBody	Fibroblast	no		1116.65	-0.671776	0.173995	-3.86089	0.000112975	0.00121919	down
ENSG00000076555	ACACB	12	109169744	109169909	Fibroblast.47XYY-Fibroblast.46XY	166	9	46.2541	Intron (ENST00000338432/ENSG00000076555, intron 4 of 52)	Hyper	acetyl-CoA carboxylase beta	ENSG00000076555.GeneBody	GeneBody	Fibroblast	no		300.411	-0.158541	0.20515	-0.772804	0.439638	0.667942	not sig
ENSG00000076826	CAMSAP3	19	7615655	7615761	Fibroblast.47XYY-Fibroblast.46XY	107	16	101.984	Promoter (<=1kb)	Hyper	calmodulin regulated spectrin associated protein family member 3	ENSG00000076826.Promoter	Promoter	Fibroblast	no
ENSG00000076826	CAMSAP3	19	7611676	7611818	Fibroblast.47XYY-Fibroblast.46XY	143	13	76.8828	Promoter (2-3kb)	Hyper	calmodulin regulated spectrin associated protein family member 3	ENSG00000076826.Promoter	Promoter	Fibroblast	no
ENSG00000076826	CAMSAP3	19	7608296	7608390	Fibroblast.47XYY-Fibroblast.46XY	95	8	47.7039	Intron (ENST00000160298/ENSG00000076826, intron 5 of 16)	Hyper	calmodulin regulated spectrin associated protein family member 3	ENSG00000076826.GeneBody	GeneBody	Fibroblast	no
ENSG00000076944	STXBP2	19	7642479	7642547	Fibroblast.47XYY-Fibroblast.46XY	69	11	46.6223	Promoter (<=1kb)	Hyper	syntaxin binding protein 2	ENSG00000076944.Promoter	Promoter	Fibroblast	no		64.6043	-0.896916	0.371823	-2.41221	0.0158561	0.0711668	not sig
ENSG00000077044	DGKD	2	233403731	233403855	Fibroblast.47XYY-Fibroblast.46XY	125	6	30.1554	Intron (ENST00000264057/ENSG00000077044, intron 3 of 29)	Hyper	diacylglycerol kinase delta	ENSG00000077044.GeneBody	GeneBody	Fibroblast	no		692.866	0.182838	0.141375	1.29329	0.195912	0.417791	not sig
ENSG00000077238	IL4R	16	27367567	27367661	Fibroblast.47XYY-Fibroblast.46XY	95	15	71.698	Distal Intergenic	Hyper	interleukin 4 receptor	ENSG00000077238.Intergenic	Intergenic	Fibroblast	no		2799.7	-0.308909	0.171632	-1.79983	0.0718876	0.216766	not sig
ENSG00000077942	FBLN1	22	45548517	45548638	Fibroblast.47XYY-Fibroblast.46XY	122	12	54.5112	Exon (ENST00000402984/ENSG00000077942, exon 14 of 16)	Hyper	fibulin 1	ENSG00000077942.GeneBody	GeneBody	Fibroblast	no		15079.9	0.872869	0.263831	3.30844	0.000938181	0.00738084	up
ENSG00000077942	FBLN1	22	45544328	45544382	Fibroblast.47XYY-Fibroblast.46XY	55	12	57.5042	Intron (ENST00000402984/ENSG00000077942, intron 12 of 15)	Hyper	fibulin 1	ENSG00000077942.GeneBody	GeneBody	Fibroblast	no		15079.9	0.872869	0.263831	3.30844	0.000938181	0.00738084	up
ENSG00000077984	CST7	20	24951194	24951271	Fibroblast.47XYY-Fibroblast.46XY	78	7	38.9557	Promoter (1-2kb)	Hyper	cystatin F	ENSG00000077984.Promoter	Promoter	Fibroblast	no
ENSG00000078269	SYNJ2	6	157990644	157990741	Fibroblast.47XYY-Fibroblast.46XY	98	6	-28.473	Intron (ENST00000355585/ENSG00000078269, intron 1 of 26)	Hypo	synaptojanin 2	ENSG00000078269.GeneBody	GeneBody	Fibroblast	no		7394.3	0.472596	0.20823	2.26958	0.0232329	0.0950986	not sig
ENSG00000078295	ADCY2	5	7785339	7785549	Fibroblast.47XYY-Fibroblast.46XY	211	6	31.0542	Intron (ENST00000338316/ENSG00000078295, intron 19 of 24)	Hyper	adenylate cyclase 2	ENSG00000078295.GeneBody	GeneBody	Fibroblast	no
ENSG00000078295	ADCY2	5	7395387	7395512	Fibroblast.47XYY-Fibroblast.46XY	126	12	-63.0141	Promoter (<=1kb)	Hypo	adenylate cyclase 2	ENSG00000078295.Promoter	Promoter	Fibroblast	no
ENSG00000078328	RBFOX1	16	5981763	5981901	Fibroblast.47XYY-Fibroblast.46XY	139	15	77.033	Intron (ENST00000569895/ENSG00000078328, intron 4 of 6)	Hyper	RNA binding fox-1 homolog 1	ENSG00000078328.GeneBody	GeneBody	Fibroblast	no
ENSG00000078328	RBFOX1	16	7552842	7552978	Fibroblast.47XYY-Fibroblast.46XY	137	8	36.8269	Intron (ENST00000641259/ENSG00000078328, intron 8 of 19)	Hyper	RNA binding fox-1 homolog 1	ENSG00000078328.GeneBody	GeneBody	Fibroblast	no
ENSG00000078900	TP73	1	3701488	3701597	Fibroblast.47XYY-Fibroblast.46XY	110	9	42.8443	Intron (ENST00000378295/ENSG00000078900, intron 3 of 13)	Hyper	tumor protein p73	ENSG00000078900.GeneBody	GeneBody	Fibroblast	no
ENSG00000078900	TP73	1	3731643	3731767	Fibroblast.47XYY-Fibroblast.46XY	125	13	66.2343	Intron (ENST00000378295/ENSG00000078900, intron 13 of 13)	Hyper	tumor protein p73	ENSG00000078900.GeneBody	GeneBody	Fibroblast	no
ENSG00000079313	REXO1	19	1837395	1837517	Fibroblast.47XYY-Fibroblast.46XY	123	7	34.209	Intron (ENST00000170168/ENSG00000079313, intron 1 of 15)	Hyper	RNA exonuclease 1 homolog	ENSG00000079313.GeneBody	GeneBody	Fibroblast	no		1192.58	0.158881	0.151722	1.04718	0.295016	0.534368	not sig
ENSG00000079459	FDFT1	8	11795891	11795982	Fibroblast.47XYY-Fibroblast.46XY	92	12	-71.4559	Promoter (<=1kb)	Hypo	farnesyl-diphosphate farnesyltransferase 1	ENSG00000079459.Promoter	Promoter	Fibroblast	no		3465.53	0.215633	0.145508	1.48194	0.138357	0.335664	not sig
ENSG00000079999	KEAP1	19	10480000	10480132	Fibroblast.47XYY-Fibroblast.46XY	133	13	69.0496	Distal Intergenic	Hyper	kelch like ECH associated protein 1	ENSG00000079999.Intergenic	Intergenic	Fibroblast	no		2189.1	0.00590882	0.0848581	0.0696317	0.944487	0.973816	not sig
ENSG00000080031	PTPRH	19	55195184	55195249	Fibroblast.47XYY-Fibroblast.46XY	66	8	37.5754	Intron (ENST00000376350/ENSG00000080031, intron 10 of 19)	Hyper	protein tyrosine phosphatase receptor type H	ENSG00000080031.GeneBody	GeneBody	Fibroblast	no
ENSG00000080345	RIF1	2	151402201	151402338	Fibroblast.47XYY-Fibroblast.46XY	138	6	28.8147	Distal Intergenic	Hyper	replication timing regulatory factor 1	ENSG00000080345.Intergenic	Intergenic	Fibroblast	no		2905.07	-0.182852	0.152252	-1.20098	0.229758	0.461368	not sig
ENSG00000080644	CHRNA3	15	78618736	78618846	Fibroblast.47XYY-Fibroblast.46XY	111	10	49.6987	Promoter (<=1kb)	Hyper	cholinergic receptor nicotinic alpha 3 subunit	ENSG00000080644.Promoter	Promoter	Fibroblast	no
ENSG00000080819	CPOX	3	98594195	98594327	Fibroblast.47XYY-Fibroblast.46XY	133	12	67.1878	Promoter (<=1kb)	Hyper	coproporphyrinogen oxidase	ENSG00000080819.Promoter	Promoter	Fibroblast	no		926.778	-0.328994	0.174515	-1.88519	0.0594046	0.189485	not sig
ENSG00000080845	DLGAP4	20	36475355	36475504	Fibroblast.47XYY-Fibroblast.46XY	150	12	56.1549	Promoter (2-3kb)	Hyper	DLG associated protein 4	ENSG00000080845.Promoter	Promoter	Fibroblast	no		7577.78	-0.0539488	0.200243	-0.269417	0.787609	0.894732	not sig
ENSG00000080845	DLGAP4	20	36312741	36312906	Fibroblast.47XYY-Fibroblast.46XY	166	8	45.9223	Intron (ENST00000373913/ENSG00000080845, intron 1 of 12)	Hyper	DLG associated protein 4	ENSG00000080845.GeneBody	GeneBody	Fibroblast	no		7577.78	-0.0539488	0.200243	-0.269417	0.787609	0.894732	not sig
ENSG00000080854	IGSF9B	11	133928263	133928396	Fibroblast.47XYY-Fibroblast.46XY	134	12	-83.1899	Intron (ENST00000533871/ENSG00000080854, intron 12 of 19)	Hypo	immunoglobulin superfamily member 9B	ENSG00000080854.GeneBody	GeneBody	Fibroblast	no		62.9867	4.93457	0.855655	5.76701	8.06923e-09	2.37386e-07	up
ENSG00000081479	LRP2	2	169326484	169326608	Fibroblast.47XYY-Fibroblast.46XY	125	6	34.7307	Intron (ENST00000649046/ENSG00000081479, intron 1 of 78)	Hyper	LDL receptor related protein 2	ENSG00000081479.GeneBody	GeneBody	Fibroblast	no
ENSG00000081803	CADPS2	7	122929380	122929515	Fibroblast.47XYY-Fibroblast.46XY	136	16	107.788	Distal Intergenic	Hyper	calcium dependent secretion activator 2	ENSG00000081803.Intergenic	Intergenic	Fibroblast	no
ENSG00000082397	EPB41L3	18	5519321	5519393	Fibroblast.47XYY-Fibroblast.46XY	73	4	19.5397	Promoter (2-3kb)	Hyper	erythrocyte membrane protein band 4.1 like 3	ENSG00000082397.Promoter	Promoter	Fibroblast	no		3133.16	-0.791256	0.348908	-2.26781	0.0233408	0.0953701	not sig
ENSG00000082458	DLG3	X	70445918	70446020	Fibroblast.47XYY-Fibroblast.46XY	103	4	28.189	Promoter (<=1kb)	Hyper	discs large MAGUK scaffold protein 3	ENSG00000082458.Promoter	Promoter	Fibroblast	no	inactive	532.197	0.274033	0.198154	1.38293	0.166687	0.378377	not sig
ENSG00000082497	SERTAD4	1	210251884	210252008	Fibroblast.47XYY-Fibroblast.46XY	125	17	-78.7974	Distal Intergenic	Hypo	SERTA domain containing 4	ENSG00000082497.Intergenic	Intergenic	Fibroblast	no		241.073	1.29026	0.323067	3.9938	6.50228e-05	0.000744915	up
ENSG00000083067	TRPM3	9	71437723	71437842	Fibroblast.47XYY-Fibroblast.46XY	120	5	23.4116	Intron (ENST00000357533/ENSG00000083067, intron 1 of 24)	Hyper	transient receptor potential cation channel subfamily M member 3	ENSG00000083067.GeneBody	GeneBody	Fibroblast	no
ENSG00000083067	TRPM3	9	71407850	71407964	Fibroblast.47XYY-Fibroblast.46XY	115	4	18.1883	Intron (ENST00000357533/ENSG00000083067, intron 1 of 24)	Hyper	transient receptor potential cation channel subfamily M member 3	ENSG00000083067.GeneBody	GeneBody	Fibroblast	no
ENSG00000084090	STARD7	2	96204409	96204554	Fibroblast.47XYY-Fibroblast.46XY	146	10	51.0595	Intron (ENST00000337288/ENSG00000084090, intron 1 of 7)	Hyper	StAR related lipid transfer domain containing 7	ENSG00000084090.GeneBody	GeneBody	Fibroblast	no		4290.83	-0.410818	0.177975	-2.30829	0.020983	0.0880483	not sig
ENSG00000084731	KIF3C	2	25923602	25923710	Fibroblast.47XYY-Fibroblast.46XY	109	8	31.8025	Distal Intergenic	Hyper	kinesin family member 3C	ENSG00000084731.Intergenic	Intergenic	Fibroblast	no		1547.8	0.103914	0.11023	0.942699	0.345835	0.585676	not sig
ENSG00000085741	WNT11	11	76200430	76200487	Fibroblast.47XYY-Fibroblast.46XY	58	5	-28.6664	Intron (ENST00000322563/ENSG00000085741, intron 1 of 4)	Hypo	Wnt family member 11	ENSG00000085741.GeneBody	GeneBody	Fibroblast	no
ENSG00000086666	ZFAND6	15	80060844	80060930	Fibroblast.47XYY-Fibroblast.46XY	87	12	54.3357	Promoter (<=1kb)	Hyper	zinc finger AN1-type containing 6	ENSG00000086666.Promoter	Promoter	Fibroblast	no		1934.34	0.114948	0.146516	0.784547	0.432719	0.662546	not sig
ENSG00000086696	HSD17B2	16	82059720	82059822	Fibroblast.47XYY-Fibroblast.46XY	103	6	37.1578	Intron (ENST00000563491/ENSG00000086696, intron 1 of 2)	Hyper	hydroxysteroid 17-beta dehydrogenase 2	ENSG00000086696.GeneBody	GeneBody	Fibroblast	no
ENSG00000087116	ADAMTS2	5	179285512	179285640	Fibroblast.47XYY-Fibroblast.46XY	129	6	32.135	Intron (ENST00000251582/ENSG00000087116, intron 2 of 21)	Hyper	ADAM metallopeptidase with thrombospondin type 1 motif 2	ENSG00000087116.GeneBody	GeneBody	Fibroblast	no		23243	-0.354738	0.211234	-1.67936	0.093081	0.259062	not sig
ENSG00000087116	ADAMTS2	5	179346250	179346364	Fibroblast.47XYY-Fibroblast.46XY	115	4	-28.9871	Promoter (<=1kb)	Hypo	ADAM metallopeptidase with thrombospondin type 1 motif 2	ENSG00000087116.Promoter	Promoter	Fibroblast	no		23243	-0.354738	0.211234	-1.67936	0.093081	0.259062	not sig
ENSG00000087116	ADAMTS2	5	179301905	179302007	Fibroblast.47XYY-Fibroblast.46XY	103	7	31.6151	Intron (ENST00000251582/ENSG00000087116, intron 2 of 21)	Hyper	ADAM metallopeptidase with thrombospondin type 1 motif 2	ENSG00000087116.GeneBody	GeneBody	Fibroblast	no		23243	-0.354738	0.211234	-1.67936	0.093081	0.259062	not sig
ENSG00000087301	TXNDC16	14	52472430	52472491	Fibroblast.47XYY-Fibroblast.46XY	62	9	42.0442	Promoter (1-2kb)	Hyper	thioredoxin domain containing 16	ENSG00000087301.Promoter	Promoter	Fibroblast	no		284.86	0.158553	0.0994832	1.59377	0.110988	0.291797	not sig
ENSG00000087494	PTHLH	12	27974419	27974524	Fibroblast.47XYY-Fibroblast.46XY	106	11	-55.0402	Promoter (1-2kb)	Hypo	parathyroid hormone like hormone	ENSG00000087494.Promoter	Promoter	Fibroblast	no		66.3611	0.563375	0.537146	1.04883	0.294256	0.533754	not sig
ENSG00000087495	PHACTR3	20	59584710	59584827	Fibroblast.47XYY-Fibroblast.46XY	118	12	70.9719	Intron (ENST00000359926/ENSG00000087495, intron 1 of 12)	Hyper	phosphatase and actin regulator 3	ENSG00000087495.GeneBody	GeneBody	Fibroblast	no		175.814	3.08013	1.44194	2.13611	0.0326707	0.122286	not sig
ENSG00000087495	PHACTR3	20	59719324	59719458	Fibroblast.47XYY-Fibroblast.46XY	135	6	28.9836	Promoter (1-2kb)	Hyper	phosphatase and actin regulator 3	ENSG00000087495.Promoter	Promoter	Fibroblast	no		175.814	3.08013	1.44194	2.13611	0.0326707	0.122286	not sig
ENSG00000087510	TFAP2C	20	56631566	56631659	Fibroblast.47XYY-Fibroblast.46XY	94	21	-71.8908	Promoter (1-2kb)	Hypo	transcription factor AP-2 gamma	ENSG00000087510.Promoter	Promoter	Fibroblast	no		763.198	0.705698	0.184906	3.81653	0.000135341	0.00142334	up
ENSG00000087510	TFAP2C	20	56631174	56631434	Fibroblast.47XYY-Fibroblast.46XY	261	34	-150.482	Promoter (<=1kb)	Hypo	transcription factor AP-2 gamma	ENSG00000087510.Promoter	Promoter	Fibroblast	no		763.198	0.705698	0.184906	3.81653	0.000135341	0.00142334	up
ENSG00000088002	SULT2B1	19	48557643	48557744	Fibroblast.47XYY-Fibroblast.46XY	102	11	41.0629	Intron (ENST00000201586/ENSG00000088002, intron 1 of 6)	Hyper	sulfotransferase family 2B member 1	ENSG00000088002.GeneBody	GeneBody	Fibroblast	no
ENSG00000088298	EDEM2	20	35153144	35153275	Fibroblast.47XYY-Fibroblast.46XY	132	8	82.6387	Distal Intergenic	Hyper	ER degradation enhancing alpha-mannosidase like protein 2	ENSG00000088298.Intergenic	Intergenic	Fibroblast	no		1130.28	-0.236463	0.0996201	-2.37365	0.0176133	0.0769494	not sig
ENSG00000088305	DNMT3B	20	32765512	32765715	Fibroblast.47XYY-Fibroblast.46XY	204	18	90.7761	Promoter (2-3kb)	Hyper	DNA methyltransferase 3 beta	ENSG00000088305.Promoter	Promoter	Fibroblast	no		291.431	0.0724422	0.245064	0.295606	0.767531	0.88493	not sig
ENSG00000088827	SIGLEC1	20	3705088	3705242	Fibroblast.47XYY-Fibroblast.46XY	155	6	32.0513	Promoter (1-2kb)	Hyper	sialic acid binding Ig like lectin 1	ENSG00000088827.Promoter	Promoter	Fibroblast	no
ENSG00000088899	LZTS3	20	3164933	3164992	Fibroblast.47XYY-Fibroblast.46XY	60	7	-26.8729	Exon (ENST00000329152/ENSG00000088899, exon 3 of 3)	Hypo	leucine zipper tumor suppressor family member 3	ENSG00000088899.GeneBody	GeneBody	Fibroblast	no		284.676	0.199812	0.205822	0.970798	0.331649	0.571675	not sig
ENSG00000088992	TESC	12	117051584	117051635	Fibroblast.47XYY-Fibroblast.46XY	52	7	38.2855	Promoter (2-3kb)	Hyper	tescalcin	ENSG00000088992.Promoter	Promoter	Fibroblast	no
ENSG00000089057	SLC23A2	20	4949913	4950024	Fibroblast.47XYY-Fibroblast.46XY	112	7	34.4412	Intron (ENST00000379333/ENSG00000089057, intron 2 of 16)	Hyper	solute carrier family 23 member 2	ENSG00000089057.GeneBody	GeneBody	Fibroblast	no		1462.82	-0.562134	0.120436	-4.6675	3.04882e-06	5.02143e-05	not sig
ENSG00000089116	LHX5	12	113609614	113609758	Fibroblast.47XYY-Fibroblast.46XY	145	5	20.7337	Intron (ENST00000661760/ENSG00000249550, intron 3 of 3)	Hyper	LIM homeobox 5	ENSG00000089116.GeneBody	GeneBody	Fibroblast	no
ENSG00000089159	PXN	12	120233493	120233601	Fibroblast.47XYY-Fibroblast.46XY	109	7	38.2479	Intron (ENST00000267257/ENSG00000089159, intron 1 of 10)	Hyper	paxillin	ENSG00000089159.GeneBody	GeneBody	Fibroblast	no		6458.66	0.00413775	0.184247	0.0224577	0.982083	0.991516	not sig
ENSG00000089169	RPH3A	12	112818050	112818156	Fibroblast.47XYY-Fibroblast.46XY	107	7	29.6464	Intron (ENST00000549736/ENSG00000089169, intron 4 of 6)	Hyper	rabphilin 3A	ENSG00000089169.GeneBody	GeneBody	Fibroblast	no
ENSG00000089225	TBX5	12	114402939	114402995	Fibroblast.47XYY-Fibroblast.46XY	57	5	-27.5222	Promoter (<=1kb)	Hypo	T-box transcription factor 5	ENSG00000089225.Promoter	Promoter	Fibroblast	no		646.467	0.960265	0.63097	1.52189	0.128037	0.318382	not sig
ENSG00000089225	TBX5	12	114403049	114403396	Fibroblast.47XYY-Fibroblast.46XY	348	54	-263.434	Promoter (<=1kb)	Hypo	T-box transcription factor 5	ENSG00000089225.Promoter	Promoter	Fibroblast	no		646.467	0.960265	0.63097	1.52189	0.128037	0.318382	not sig
ENSG00000089351	GRAMD1A	19	34980039	34980109	Fibroblast.47XYY-Fibroblast.46XY	71	4	21.4301	Distal Intergenic	Hyper	GRAM domain containing 1A	ENSG00000089351.Intergenic	Intergenic	Fibroblast	no		1887.23	0.151335	0.139917	1.08161	0.279427	0.518246	not sig
ENSG00000089737	DDX24	14	94079136	94079332	Fibroblast.47XYY-Fibroblast.46XY	197	4	23.1276	Promoter (1-2kb)	Hyper	DEAD-box helicase 24	ENSG00000089737.Promoter	Promoter	Fibroblast	no		4876.12	-0.304181	0.111036	-2.73949	0.0061535	0.0341519	not sig
ENSG00000089847	ANKRD24	19	4191513	4191574	Fibroblast.47XYY-Fibroblast.46XY	62	7	29.9436	Intron (ENST00000600132/ENSG00000089847, intron 2 of 21)	Hyper	ankyrin repeat domain 24	ENSG00000089847.GeneBody	GeneBody	Fibroblast	no
ENSG00000090020	SLC9A1	1	27101755	27101854	Fibroblast.47XYY-Fibroblast.46XY	100	10	-42.7474	Promoter (<=1kb)	Hypo	solute carrier family 9 member A1	ENSG00000090020.Promoter	Promoter	Fibroblast	no		2443.86	-0.0431079	0.139438	-0.309155	0.757203	0.878794	not sig
ENSG00000090554	FLT3LG	19	49476867	49477073	Fibroblast.47XYY-Fibroblast.46XY	207	10	63.6682	Promoter (<=1kb)	Hyper	fms related receptor tyrosine kinase 3 ligand	ENSG00000090554.Promoter	Promoter	Fibroblast	no
ENSG00000090565	RAB11FIP3	16	490498	490573	Fibroblast.47XYY-Fibroblast.46XY	76	6	23.093	Promoter (1-2kb)	Hyper	RAB11 family interacting protein 3	ENSG00000090565.Promoter	Promoter	Fibroblast	no		2016.81	-0.264694	0.198061	-1.33642	0.181411	0.398578	not sig
ENSG00000090686	USP48	1	21780930	21781035	Fibroblast.47XYY-Fibroblast.46XY	106	7	32.2116	Promoter (<=1kb)	Hyper	ubiquitin specific peptidase 48	ENSG00000090686.Promoter	Promoter	Fibroblast	no		3587.32	0.0372648	0.142002	0.262424	0.792995	0.897569	not sig
ENSG00000090776	EFNB1	X	68912313	68912366	Fibroblast.47XYY-Fibroblast.46XY	54	15	-42.9476	Distal Intergenic	Hypo	ephrin B1	ENSG00000090776.Intergenic	Intergenic	Fibroblast	no	inactive	947.233	-0.215698	0.210514	-1.02463	0.30554	0.546719	not sig
ENSG00000090776	EFNB1	X	68912519	68912604	Fibroblast.47XYY-Fibroblast.46XY	86	4	-23.089	Distal Intergenic	Hypo	ephrin B1	ENSG00000090776.Intergenic	Intergenic	Fibroblast	no	inactive	947.233	-0.215698	0.210514	-1.02463	0.30554	0.546719	not sig
ENSG00000091140	DLD	7	107880399	107880603	Fibroblast.47XYY-Fibroblast.46XY	205	8	38.4418	Distal Intergenic	Hyper	dihydrolipoamide dehydrogenase	ENSG00000091140.Intergenic	Intergenic	Fibroblast	no		3109	-0.247193	0.181248	-1.36384	0.172619	0.386639	not sig
ENSG00000091490	SEL1L3	4	25843693	25843950	Fibroblast.47XYY-Fibroblast.46XY	258	28	157.021	Intron (ENST00000399878/ENSG00000091490, intron 2 of 23)	Hyper	SEL1L family member 3	ENSG00000091490.GeneBody	GeneBody	Fibroblast	no		3398.16	-0.529593	0.165276	-3.20429	0.00135398	0.0100111	not sig
ENSG00000091490	SEL1L3	4	25863502	25863825	Fibroblast.47XYY-Fibroblast.46XY	324	26	-149.499	Promoter (<=1kb)	Hypo	SEL1L family member 3	ENSG00000091490.Promoter	Promoter	Fibroblast	no		3398.16	-0.529593	0.165276	-3.20429	0.00135398	0.0100111	not sig
ENSG00000091622	PITPNM3	17	6489873	6489928	Fibroblast.47XYY-Fibroblast.46XY	56	7	33.1623	Intron (ENST00000262483/ENSG00000091622, intron 4 of 19)	Hyper	PITPNM family member 3	ENSG00000091622.GeneBody	GeneBody	Fibroblast	no		761.84	2.46309	0.385375	6.39141	1.64367e-10	6.8297e-09	up
ENSG00000091879	ANGPT2	8	6550344	6550459	Fibroblast.47XYY-Fibroblast.46XY	116	15	61.6835	Intron (ENST00000344683/ENSG00000147316, intron 12 of 13)	Hyper	angiopoietin 2	ENSG00000091879.GeneBody	GeneBody	Fibroblast	no
ENSG00000092199	HNRNPC	14	21231165	21231227	Fibroblast.47XYY-Fibroblast.46XY	63	4	21.6563	Promoter (<=1kb)	Hyper	heterogeneous nuclear ribonucleoprotein C	ENSG00000092199.Promoter	Promoter	Fibroblast	no		15273.1	0.0609882	0.188812	0.323009	0.746688	0.87206	not sig
ENSG00000092208	GEMIN2	14	39121872	39122016	Fibroblast.47XYY-Fibroblast.46XY	145	10	76.5436	3' UTR	Hyper	gem nuclear organelle associated protein 2	ENSG00000092208.GeneBody	GeneBody	Fibroblast	no		257.612	-0.15094	0.178216	-0.846949	0.397024	0.634047	not sig
ENSG00000092421	SEMA6A	5	116572462	116572566	Fibroblast.47XYY-Fibroblast.46XY	105	13	-52.1979	Promoter (1-2kb)	Hypo	semaphorin 6A	ENSG00000092421.Promoter	Promoter	Fibroblast	no
ENSG00000092621	PHGDH	1	119676024	119676620	Fibroblast.47XYY-Fibroblast.46XY	597	15	86.6214	Intron (ENST00000641597/ENSG00000092621, intron 3 of 14)	Hyper	phosphoglycerate dehydrogenase	ENSG00000092621.GeneBody	GeneBody	Fibroblast	no		7671.64	0.446996	0.28486	1.56918	0.116606	0.300772	not sig
ENSG00000095066	HOOK2	19	12780743	12780834	Fibroblast.47XYY-Fibroblast.46XY	92	9	46.5336	Promoter (2-3kb)	Hyper	hook microtubule tethering protein 2	ENSG00000095066.Promoter	Promoter	Fibroblast	no		757.304	0.213652	0.171624	1.24489	0.213173	0.440786	not sig
ENSG00000095203	EPB41L4B	9	109318995	109319257	Fibroblast.47XYY-Fibroblast.46XY	263	29	-141.582	Promoter (1-2kb)	Hypo	erythrocyte membrane protein band 4.1 like 4B	ENSG00000095203.Promoter	Promoter	Fibroblast	no		82.4383	-1.70852	0.292465	-5.84179	5.16431e-09	1.5864e-07	down
ENSG00000095906	NUBP2	16	1785328	1785440	Fibroblast.47XYY-Fibroblast.46XY	113	6	39.2461	Promoter (<=1kb)	Hyper	NUBP iron-sulfur cluster assembly factor 2, cytosolic	ENSG00000095906.Promoter	Promoter	Fibroblast	no		945.801	-0.097524	0.177253	-0.550195	0.582185	0.771632	not sig
ENSG00000095932	SMIM24	19	3466500	3466579	Fibroblast.47XYY-Fibroblast.46XY	80	5	21.9974	3' UTR	Hyper	small integral membrane protein 24	ENSG00000095932.GeneBody	GeneBody	Fibroblast	no
ENSG00000097007	ABL1	9	130841341	130841533	Fibroblast.47XYY-Fibroblast.46XY	193	15	78.625	Intron (ENST00000372348/ENSG00000097007, intron 1 of 10)	Hyper	ABL proto-oncogene 1, non-receptor tyrosine kinase	ENSG00000097007.GeneBody	GeneBody	Fibroblast	no		6606.8	0.382917	0.147501	2.59603	0.00943073	0.0477281	not sig
ENSG00000099331	MYO9B	19	17121842	17121910	Fibroblast.47XYY-Fibroblast.46XY	69	4	18.8845	Intron (ENST00000595618/ENSG00000099331, intron 2 of 39)	Hyper	myosin IXB	ENSG00000099331.GeneBody	GeneBody	Fibroblast	no		7877.92	-0.335741	0.152301	-2.20446	0.027492	0.107502	not sig
ENSG00000099331	MYO9B	19	17117416	17117482	Fibroblast.47XYY-Fibroblast.46XY	67	5	28.3029	Intron (ENST00000595618/ENSG00000099331, intron 2 of 39)	Hyper	myosin IXB	ENSG00000099331.GeneBody	GeneBody	Fibroblast	no		7877.92	-0.335741	0.152301	-2.20446	0.027492	0.107502	not sig
ENSG00000099338	CATSPERG	19	38364525	38364669	Fibroblast.47XYY-Fibroblast.46XY	145	12	59.6246	Promoter (<=1kb)	Hyper	cation channel sperm associated auxiliary subunit gamma	ENSG00000099338.Promoter	Promoter	Fibroblast	no
ENSG00000099385	BCL7C	16	30831773	30831831	Fibroblast.47XYY-Fibroblast.46XY	59	4	17.1264	Distal Intergenic	Hyper	BAF chromatin remodeling complex subunit BCL7C	ENSG00000099385.Intergenic	Intergenic	Fibroblast	no		1298.37	0.271682	0.129091	2.10458	0.0353276	0.129156	not sig
ENSG00000099617	EFNA2	19	1292490	1292609	Fibroblast.47XYY-Fibroblast.46XY	120	5	26.9007	Intron (ENST00000215368/ENSG00000099617, intron 1 of 3)	Hyper	ephrin A2	ENSG00000099617.GeneBody	GeneBody	Fibroblast	no
ENSG00000099624	ATP5F1D	19	1242717	1242848	Fibroblast.47XYY-Fibroblast.46XY	132	8	38.0848	Promoter (<=1kb)	Hyper	ATP synthase F1 subunit delta	ENSG00000099624.Promoter	Promoter	Fibroblast	no		1655.85	-0.0687563	0.167145	-0.411357	0.680811	0.832824	not sig
ENSG00000099795	NDUFB7	19	14570494	14570632	Fibroblast.47XYY-Fibroblast.46XY	139	6	33.3449	Promoter (1-2kb)	Hyper	NADH:ubiquinone oxidoreductase subunit B7	ENSG00000099795.Promoter	Promoter	Fibroblast	no		1478.91	-0.24442	0.18547	-1.31784	0.187557	0.407073	not sig
ENSG00000099864	PALM	19	733964	734129	Fibroblast.47XYY-Fibroblast.46XY	166	10	50.5945	Promoter (<=1kb)	Hyper	paralemmin	ENSG00000099864.Promoter	Promoter	Fibroblast	no		185.539	4.29659	0.56787	7.56616	3.84432e-14	2.74484e-12	up
ENSG00000099864	PALM	19	722937	723059	Fibroblast.47XYY-Fibroblast.46XY	123	10	49.4491	Promoter (<=1kb)	Hyper	paralemmin	ENSG00000099864.Promoter	Promoter	Fibroblast	no		185.539	4.29659	0.56787	7.56616	3.84432e-14	2.74484e-12	up
ENSG00000099889	ARVCF	22	19995456	19996204	Fibroblast.47XYY-Fibroblast.46XY	749	16	98.2697	Intron (ENST00000263207/ENSG00000099889, intron 2 of 19)	Hyper	ARVCF delta catenin family member	ENSG00000099889.GeneBody	GeneBody	Fibroblast	no		275.369	-3.16441	0.282469	-11.2027	3.9566e-29	1.58372e-26	down
ENSG00000099917	MED15	22	20496998	20497059	Fibroblast.47XYY-Fibroblast.46XY	62	11	67.2853	Promoter (1-2kb)	Hyper	mediator complex subunit 15	ENSG00000099917.Promoter	Promoter	Fibroblast	no		4880.69	-0.172092	0.174766	-0.9847	0.324771	0.56461	not sig
ENSG00000099954	CECR2	22	17461952	17462126	Fibroblast.47XYY-Fibroblast.46XY	175	10	56.8917	Intron (ENST00000400585/ENSG00000099954, intron 1 of 18)	Hyper	CECR2 histone acetyl-lysine reader	ENSG00000099954.GeneBody	GeneBody	Fibroblast	no
ENSG00000099954	CECR2	22	17488072	17488178	Fibroblast.47XYY-Fibroblast.46XY	107	7	38.4686	Intron (ENST00000400585/ENSG00000099954, intron 2 of 18)	Hyper	CECR2 histone acetyl-lysine reader	ENSG00000099954.GeneBody	GeneBody	Fibroblast	no
ENSG00000100027	YPEL1	22	21703711	21703985	Fibroblast.47XYY-Fibroblast.46XY	275	27	171.551	Exon (ENST00000339468/ENSG00000100027, exon 3 of 5)	Hyper	yippee like 1	ENSG00000100027.GeneBody	GeneBody	Fibroblast	no
ENSG00000100056	ESS2	22	19141794	19141938	Fibroblast.47XYY-Fibroblast.46XY	145	6	27.5786	Promoter (2-3kb)	Hyper	ess-2 splicing factor homolog	ENSG00000100056.Promoter	Promoter	Fibroblast	no		786.728	-0.427243	0.161176	-2.65079	0.0080303	0.0419922	not sig
ENSG00000100075	SLC25A1	22	19176420	19176646	Fibroblast.47XYY-Fibroblast.46XY	227	13	-62.295	Promoter (1-2kb)	Hypo	solute carrier family 25 member 1	ENSG00000100075.Promoter	Promoter	Fibroblast	no		2876.53	-0.0648028	0.161648	-0.400889	0.688502	0.837655	not sig
ENSG00000100079	LGALS2	22	37581653	37581765	Fibroblast.47XYY-Fibroblast.46XY	113	6	30.5217	Promoter (<=1kb)	Hyper	galectin 2	ENSG00000100079.Promoter	Promoter	Fibroblast	no
ENSG00000100095	SEZ6L	22	26299012	26299188	Fibroblast.47XYY-Fibroblast.46XY	177	8	47.621	Exon (ENST00000248933/ENSG00000100095, exon 5 of 17)	Hyper	seizure related 6 homolog like	ENSG00000100095.GeneBody	GeneBody	Fibroblast	no
ENSG00000100121	GGTLC2	22	22652245	22652304	Fibroblast.47XYY-Fibroblast.46XY	60	4	19.9034	Distal Intergenic	Hyper	gamma-glutamyltransferase light chain 2	ENSG00000100121.Intergenic	Intergenic	Fibroblast	no
ENSG00000100142	POLR2F	22	37951975	37952091	Fibroblast.47XYY-Fibroblast.46XY	117	4	23.4224	Promoter (<=1kb)	Hyper	RNA polymerase II, I and III subunit F	ENSG00000100142.Promoter	Promoter	Fibroblast	no		976.459	0.0921223	0.0842373	1.0936	0.274128	0.512231	not sig
ENSG00000100154	TTC28	22	28101519	28101620	Fibroblast.47XYY-Fibroblast.46XY	102	4	19.0195	Intron (ENST00000612946/ENSG00000100154, intron 6 of 20)	Hyper	tetratricopeptide repeat domain 28	ENSG00000100154.GeneBody	GeneBody	Fibroblast	no		2566.42	0.0966977	0.199538	0.484608	0.627954	0.802967	not sig
ENSG00000100156	SLC16A8	22	38086142	38086246	Fibroblast.47XYY-Fibroblast.46XY	105	10	-46.2051	Promoter (2-3kb)	Hypo	solute carrier family 16 member 8	ENSG00000100156.Promoter	Promoter	Fibroblast	no
ENSG00000100191	SLC5A4	22	32254532	32254660	Fibroblast.47XYY-Fibroblast.46XY	129	12	50.3937	Promoter (<=1kb)	Hyper	solute carrier family 5 member 4	ENSG00000100191.Promoter	Promoter	Fibroblast	no
ENSG00000100207	TCF20	22	42328914	42328980	Fibroblast.47XYY-Fibroblast.46XY	67	6	26.6887	Intron (ENST00000515426/ENSG00000100207, intron 1 of 1)	Hyper	transcription factor 20	ENSG00000100207.GeneBody	GeneBody	Fibroblast	no		956.744	0.113385	0.119774	0.946656	0.343814	0.583746	not sig
ENSG00000100207	TCF20	22	42353877	42354883	Fibroblast.47XYY-Fibroblast.46XY	1007	12	65.7133	Distal Intergenic	Hyper	transcription factor 20	ENSG00000100207.Intergenic	Intergenic	Fibroblast	no		956.744	0.113385	0.119774	0.946656	0.343814	0.583746	not sig
ENSG00000100219	XBP1	22	28798468	28798597	Fibroblast.47XYY-Fibroblast.46XY	130	6	42.5987	Promoter (1-2kb)	Hyper	X-box binding protein 1	ENSG00000100219.Promoter	Promoter	Fibroblast	no		5941.92	0.109346	0.210261	0.52005	0.603028	0.785165	not sig
ENSG00000100221	JOSD1	22	38702099	38702176	Fibroblast.47XYY-Fibroblast.46XY	78	9	40.5454	Promoter (<=1kb)	Hyper	Josephin domain containing 1	ENSG00000100221.Promoter	Promoter	Fibroblast	no		3215.21	0.0688814	0.147029	0.468488	0.639435	0.808799	not sig
ENSG00000100242	SUN2	22	38764465	38764570	Fibroblast.47XYY-Fibroblast.46XY	106	6	27.8095	Intron (ENST00000406622/ENSG00000100242, intron 2 of 18)	Hyper	Sad1 and UNC84 domain containing 2	ENSG00000100242.GeneBody	GeneBody	Fibroblast	no		4616.88	-0.0588766	0.14764	-0.398785	0.690051	0.838536	not sig
ENSG00000100284	TOM1	22	35352545	35352707	Fibroblast.47XYY-Fibroblast.46XY	163	10	51.7142	Distal Intergenic	Hyper	target of myb1 membrane trafficking protein	ENSG00000100284.Intergenic	Intergenic	Fibroblast	no		2487.18	-0.68591	0.242569	-2.82769	0.00468846	0.0274878	down
ENSG00000100299	ARSA	22	50642844	50642965	Fibroblast.47XYY-Fibroblast.46XY	122	15	67.6881	Distal Intergenic	Hyper	arylsulfatase A	ENSG00000100299.Intergenic	Intergenic	Fibroblast	no		2267.76	-0.247982	0.199326	-1.2441	0.213461	0.441047	not sig
ENSG00000100304	TTLL12	22	43197595	43197686	Fibroblast.47XYY-Fibroblast.46XY	92	5	-20.8911	3' UTR	Hypo	tubulin tyrosine ligase like 12	ENSG00000100304.GeneBody	GeneBody	Fibroblast	no		1453.95	-0.269788	0.142902	-1.88792	0.0590366	0.188742	not sig
ENSG00000100346	CACNA1I	22	39625032	39625205	Fibroblast.47XYY-Fibroblast.46XY	174	14	69.2415	Intron (ENST00000407673/ENSG00000100346, intron 4 of 34)	Hyper	calcium voltage-gated channel subunit alpha1 I	ENSG00000100346.GeneBody	GeneBody	Fibroblast	no
ENSG00000100346	CACNA1I	22	39630444	39630552	Fibroblast.47XYY-Fibroblast.46XY	109	11	53.7346	Intron (ENST00000407673/ENSG00000100346, intron 4 of 34)	Hyper	calcium voltage-gated channel subunit alpha1 I	ENSG00000100346.GeneBody	GeneBody	Fibroblast	no
ENSG00000100346	CACNA1I	22	39664040	39664201	Fibroblast.47XYY-Fibroblast.46XY	162	18	102.649	Exon (ENST00000407673/ENSG00000100346, exon 19 of 35)	Hyper	calcium voltage-gated channel subunit alpha1 I	ENSG00000100346.GeneBody	GeneBody	Fibroblast	no
ENSG00000100354	TNRC6B	22	40176226	40176422	Fibroblast.47XYY-Fibroblast.46XY	197	15	69.9739	Promoter (1-2kb)	Hyper	trinucleotide repeat containing adaptor 6B	ENSG00000100354.Promoter	Promoter	Fibroblast	no		1330.08	0.105393	0.18856	0.558936	0.576205	0.767506	not sig
ENSG00000100364	KIAA0930	22	45216829	45216888	Fibroblast.47XYY-Fibroblast.46XY	60	4	-18.1428	Intron (ENST00000336156/ENSG00000100364, intron 1 of 9)	Hypo	KIAA0930	ENSG00000100364.GeneBody	GeneBody	Fibroblast	no		3186.57	-0.282146	0.144663	-1.95036	0.051133	0.170344	not sig
ENSG00000100372	SLC25A17	22	40735760	40735885	Fibroblast.47XYY-Fibroblast.46XY	126	8	78.4067	Distal Intergenic	Hyper	solute carrier family 25 member 17	ENSG00000100372.Intergenic	Intergenic	Fibroblast	no		863.95	-0.119184	0.176885	-0.673793	0.500443	0.715049	not sig
ENSG00000100427	MLC1	22	50080301	50080410	Fibroblast.47XYY-Fibroblast.46XY	110	8	48.6373	Exon (ENST00000395876/ENSG00000100427, exon 4 of 12)	Hyper	modulator of VRAC current 1	ENSG00000100427.GeneBody	GeneBody	Fibroblast	no
ENSG00000100441	KHNYN	14	24432276	24432352	Fibroblast.47XYY-Fibroblast.46XY	77	6	27.6978	Promoter (<=1kb)	Hyper	KH and NYN domain containing	ENSG00000100441.Promoter	Promoter	Fibroblast	no		2900.33	0.116363	0.205164	0.567171	0.570598	0.76372	not sig
ENSG00000100461	RBM23	14	22918115	22918192	Fibroblast.47XYY-Fibroblast.46XY	78	13	69.3162	Promoter (<=1kb)	Hyper	RNA binding motif protein 23	ENSG00000100461.Promoter	Promoter	Fibroblast	no		2013.02	-0.0478767	0.139789	-0.342494	0.731979	0.862929	not sig
ENSG00000100505	TRIM9	14	51093448	51093585	Fibroblast.47XYY-Fibroblast.46XY	138	22	-110.349	Promoter (1-2kb)	Hypo	tripartite motif containing 9	ENSG00000100505.Promoter	Promoter	Fibroblast	no
ENSG00000100526	CDKN3	14	54219512	54219607	Fibroblast.47XYY-Fibroblast.46XY	96	11	-48.3128	Distal Intergenic	Hypo	cyclin dependent kinase inhibitor 3	ENSG00000100526.Intergenic	Intergenic	Fibroblast	no		570.312	-0.0929091	0.261974	-0.35465	0.722852	0.85749	not sig
ENSG00000100532	CGRRF1	14	54548942	54549078	Fibroblast.47XYY-Fibroblast.46XY	137	7	29.024	Distal Intergenic	Hyper	cell growth regulator with ring finger domain 1	ENSG00000100532.Intergenic	Intergenic	Fibroblast	no		386.444	-0.0783167	0.190995	-0.410045	0.681773	0.83313	not sig
ENSG00000100591	AHSA1	14	77474250	77474371	Fibroblast.47XYY-Fibroblast.46XY	122	6	35.309	Distal Intergenic	Hyper	activator of HSP90 ATPase activity 1	ENSG00000100591.Intergenic	Intergenic	Fibroblast	no		3299.69	-0.0194804	0.131887	-0.147706	0.882575	0.943417	not sig
ENSG00000100604	CHGA	14	92959310	92959903	Fibroblast.47XYY-Fibroblast.46XY	594	9	-44.3976	Intron (ENST00000354313/ENSG00000100605, intron 7 of 10)	Hypo	chromogranin A	ENSG00000100604.GeneBody	GeneBody	Fibroblast	no
ENSG00000100605	ITPK1	14	93118777	93118917	Fibroblast.47XYY-Fibroblast.46XY	141	13	54.5954	Promoter (2-3kb)	Hyper	inositol-tetrakisphosphate 1-kinase	ENSG00000100605.Promoter	Promoter	Fibroblast	no		1175.8	-0.692091	0.0860264	-8.04511	8.61703e-16	7.6907e-14	down
ENSG00000100614	PPM1A	14	60279160	60279279	Fibroblast.47XYY-Fibroblast.46XY	120	4	22.1821	Intron (ENST00000325642/ENSG00000100614, intron 1 of 5)	Hyper	protein phosphatase, Mg2+/Mn2+ dependent 1A	ENSG00000100614.GeneBody	GeneBody	Fibroblast	no		2067.74	0.0152829	0.11567	0.132126	0.894885	0.949441	not sig
ENSG00000100647	SUSD6	14	69673666	69673790	Fibroblast.47XYY-Fibroblast.46XY	125	6	28.6122	Intron (ENST00000342745/ENSG00000100647, intron 2 of 5)	Hyper	sushi domain containing 6	ENSG00000100647.GeneBody	GeneBody	Fibroblast	no		1361.89	-0.195811	0.0795438	-2.46167	0.013829	0.0639592	not sig
ENSG00000100664	EIF5	14	103346047	103346104	Fibroblast.47XYY-Fibroblast.46XY	58	8	32.7687	Distal Intergenic	Hyper	eukaryotic translation initiation factor 5	ENSG00000100664.Intergenic	Intergenic	Fibroblast	no		9789.97	0.0286601	0.151823	0.188773	0.850271	0.926287	not sig
ENSG00000101084	RAB5IF	20	36604976	36605193	Fibroblast.47XYY-Fibroblast.46XY	218	23	130.525	Promoter (<=1kb)	Hyper	RAB5 interacting factor	ENSG00000101084.Promoter	Promoter	Fibroblast	no		147.176	-0.308509	0.254875	-1.21043	0.226112	0.456684	not sig
ENSG00000101098	RIMS4	20	44809335	44809446	Fibroblast.47XYY-Fibroblast.46XY	112	9	-59.33	Promoter (<=1kb)	Hypo	regulating synaptic membrane exocytosis 4	ENSG00000101098.Promoter	Promoter	Fibroblast	no
ENSG00000101144	BMP7	20	57169916	57170052	Fibroblast.47XYY-Fibroblast.46XY	137	6	32.4278	3' UTR	Hyper	bone morphogenetic protein 7	ENSG00000101144.GeneBody	GeneBody	Fibroblast	no
ENSG00000101188	NTSR1	20	62761412	62761670	Fibroblast.47XYY-Fibroblast.46XY	259	9	40.111	3' UTR	Hyper	neurotensin receptor 1	ENSG00000101188.GeneBody	GeneBody	Fibroblast	no
ENSG00000101194	SLC17A9	20	62973406	62973568	Fibroblast.47XYY-Fibroblast.46XY	163	14	100.879	Distal Intergenic	Hyper	solute carrier family 17 member 9	ENSG00000101194.Intergenic	Intergenic	Fibroblast	no		3513.13	-0.328205	0.179578	-1.82764	0.0676034	0.208201	not sig
ENSG00000101199	ARFGAP1	20	63277708	63277816	Fibroblast.47XYY-Fibroblast.46XY	109	10	46.7708	Intron (ENST00000519273/ENSG00000101199, intron 4 of 11)	Hyper	ADP ribosylation factor GTPase activating protein 1	ENSG00000101199.GeneBody	GeneBody	Fibroblast	no		6718.91	0.22546	0.179056	1.25916	0.207974	0.433438	not sig
ENSG00000101203	COL20A1	20	63290407	63290601	Fibroblast.47XYY-Fibroblast.46XY	195	16	85.4159	Promoter (2-3kb)	Hyper	collagen type XX alpha 1 chain	ENSG00000101203.Promoter	Promoter	Fibroblast	no
ENSG00000101294	HM13	20	31549367	31549542	Fibroblast.47XYY-Fibroblast.46XY	176	8	44.9182	Promoter (<=1kb)	Hyper	histocompatibility minor 13	ENSG00000101294.Promoter	Promoter	Fibroblast	no		8801.22	-0.198016	0.172721	-1.14645	0.251609	0.486176	not sig
ENSG00000101306	MYLK2	20	31823531	31823629	Fibroblast.47XYY-Fibroblast.46XY	99	6	29.5246	Exon (ENST00000375994/ENSG00000101306, exon 4 of 12)	Hyper	myosin light chain kinase 2	ENSG00000101306.GeneBody	GeneBody	Fibroblast	no
ENSG00000101335	MYL9	20	36539086	36539253	Fibroblast.47XYY-Fibroblast.46XY	168	13	70.6124	Promoter (2-3kb)	Hyper	myosin light chain 9	ENSG00000101335.Promoter	Promoter	Fibroblast	no		56003.7	-0.375599	0.245836	-1.52784	0.126552	0.315719	not sig
ENSG00000101336	HCK	20	32058899	32058981	Fibroblast.47XYY-Fibroblast.46XY	83	5	27.8166	Intron (ENST00000375862/ENSG00000101336, intron 1 of 12)	Hyper	HCK proto-oncogene, Src family tyrosine kinase	ENSG00000101336.GeneBody	GeneBody	Fibroblast	no
ENSG00000101346	POFUT1	20	32228282	32228381	Fibroblast.47XYY-Fibroblast.46XY	100	6	25.3891	Exon (ENST00000375749/ENSG00000101346, exon 5 of 7)	Hyper	protein O-fucosyltransferase 1	ENSG00000101346.GeneBody	GeneBody	Fibroblast	no		4741.22	-0.228614	0.102226	-2.23636	0.0253279	0.100983	not sig
ENSG00000101367	MAPRE1	20	32811481	32811600	Fibroblast.47XYY-Fibroblast.46XY	120	6	27.2229	Distal Intergenic	Hyper	microtubule associated protein RP/EB family member 1	ENSG00000101367.Intergenic	Intergenic	Fibroblast	no		6494.12	-0.120465	0.223916	-0.537991	0.590583	0.777231	not sig
ENSG00000101400	SNTA1	20	33453498	33453634	Fibroblast.47XYY-Fibroblast.46XY	137	10	51.8927	Distal Intergenic	Hyper	syntrophin alpha 1	ENSG00000101400.Intergenic	Intergenic	Fibroblast	no		1337.56	-0.318348	0.127591	-2.49506	0.0125935	0.0595161	not sig
ENSG00000101440	ASIP	20	34203883	34204019	Fibroblast.47XYY-Fibroblast.46XY	137	8	65.2832	Intron (ENST00000568305/ENSG00000101440, intron 1 of 3)	Hyper	agouti signaling protein	ENSG00000101440.GeneBody	GeneBody	Fibroblast	no
ENSG00000101447	FAM83D	20	38925856	38925948	Fibroblast.47XYY-Fibroblast.46XY	93	9	38.4997	Promoter (<=1kb)	Hyper	family with sequence similarity 83 member D	ENSG00000101447.Promoter	Promoter	Fibroblast	no		803.862	-0.220531	0.297374	-0.741595	0.458333	0.682308	not sig
ENSG00000101605	MYOM1	18	3155369	3155519	Fibroblast.47XYY-Fibroblast.46XY	151	15	87.4573	Intron (ENST00000356443/ENSG00000101605, intron 10 of 37)	Hyper	myomesin 1	ENSG00000101605.GeneBody	GeneBody	Fibroblast	no		53.9484	1.47029	0.390472	3.76542	0.000166271	0.00169074	up
ENSG00000101605	MYOM1	18	3199558	3199623	Fibroblast.47XYY-Fibroblast.46XY	66	5	32.886	Intron (ENST00000580139/ENSG00000265399, intron 2 of 4)	Hyper	myomesin 1	ENSG00000101605.GeneBody	GeneBody	Fibroblast	no		53.9484	1.47029	0.390472	3.76542	0.000166271	0.00169074	up
ENSG00000101654	RNMT	18	13780860	13780995	Fibroblast.47XYY-Fibroblast.46XY	136	10	62.4065	Distal Intergenic	Hyper	RNA guanine-7 methyltransferase	ENSG00000101654.Intergenic	Intergenic	Fibroblast	no		1995.54	0.142364	0.0654175	2.17624	0.0295376	0.113617	not sig
ENSG00000101745	ANKRD12	18	9138310	9138381	Fibroblast.47XYY-Fibroblast.46XY	72	7	30.1581	Promoter (<=1kb)	Hyper	ankyrin repeat domain 12	ENSG00000101745.Promoter	Promoter	Fibroblast	no		2388.82	-0.298044	0.187457	-1.58993	0.111851	0.293027	not sig
ENSG00000101751	POLI	18	54258155	54258231	Fibroblast.47XYY-Fibroblast.46XY	77	4	22.309	Distal Intergenic	Hyper	DNA polymerase iota	ENSG00000101751.Intergenic	Intergenic	Fibroblast	no		1202	0.0395899	0.162473	0.24367	0.807487	0.903821	not sig
ENSG00000101974	ATP11C	X	139824422	139824543	Fibroblast.47XYY-Fibroblast.46XY	122	8	47.7284	Intron (ENST00000370557/ENSG00000101974, intron 2 of 28)	Hyper	ATPase phospholipid transporting 11C	ENSG00000101974.GeneBody	GeneBody	Fibroblast	no	inactive	3242.62	-0.274785	0.224799	-1.22236	0.221571	0.451308	not sig
ENSG00000102172	SMS	X	21942971	21943141	Fibroblast.47XYY-Fibroblast.46XY	171	14	96.5749	Promoter (1-2kb)	Hyper	spermine synthase	ENSG00000102172.Promoter	Promoter	Fibroblast	no	inactive	6164.08	0.247895	0.195583	1.26747	0.204987	0.429786	not sig
ENSG00000102313	ITIH6	X	54778354	54778490	Fibroblast.47XYY-Fibroblast.46XY	137	4	23.2597	Intron (ENST00000218436/ENSG00000102313, intron 5 of 12)	Hyper	inter-alpha-trypsin inhibitor heavy chain family member 6	ENSG00000102313.GeneBody	GeneBody	Fibroblast	no
ENSG00000102531	FNDC3A	13	48878233	48878369	Fibroblast.47XYY-Fibroblast.46XY	137	8	75.9808	Distal Intergenic	Hyper	fibronectin type III domain containing 3A	ENSG00000102531.Intergenic	Intergenic	Fibroblast	no		3331.47	-0.152363	0.166026	-0.917707	0.358772	0.598135	not sig
ENSG00000102572	STK24	13	98565945	98566068	Fibroblast.47XYY-Fibroblast.46XY	124	8	54.4465	Intron (ENST00000539966/ENSG00000102572, intron 1 of 10)	Hyper	serine/threonine kinase 24	ENSG00000102572.GeneBody	GeneBody	Fibroblast	no		3033.4	0.109178	0.183411	0.595264	0.551667	0.751024	not sig
ENSG00000102606	ARHGEF7	13	111272329	111272424	Fibroblast.47XYY-Fibroblast.46XY	96	6	47.0082	Intron (ENST00000317133/ENSG00000102606, intron 9 of 18)	Hyper	Rho guanine nucleotide exchange factor 7	ENSG00000102606.GeneBody	GeneBody	Fibroblast	no		2724.01	0.234014	0.163744	1.42915	0.152962	0.357169	not sig
ENSG00000102678	FGF9	13	21653726	21653863	Fibroblast.47XYY-Fibroblast.46XY	138	16	79.8448	Distal Intergenic	Hyper	fibroblast growth factor 9	ENSG00000102678.Intergenic	Intergenic	Fibroblast	no
ENSG00000102755	FLT1	13	28368430	28369920	Fibroblast.47XYY-Fibroblast.46XY	1491	4	19.8553	3' UTR	Hyper	fms related receptor tyrosine kinase 1	ENSG00000102755.GeneBody	GeneBody	Fibroblast	no		866.216	3.41235	0.570686	5.97939	2.23981e-09	7.50904e-08	up
ENSG00000102802	MEDAG	13	30907386	30907524	Fibroblast.47XYY-Fibroblast.46XY	139	4	22.3293	Promoter (<=1kb)	Hyper	mesenteric estrogen dependent adipogenesis	ENSG00000102802.Promoter	Promoter	Fibroblast	no		1180.48	0.743896	0.147003	5.06042	4.1833e-07	8.43621e-06	up
ENSG00000102804	TSC22D1	13	44483382	44483488	Fibroblast.47XYY-Fibroblast.46XY	107	13	74.163	Intron (ENST00000458659/ENSG00000102804, intron 1 of 2)	Hyper	TSC22 domain family member 1	ENSG00000102804.GeneBody	GeneBody	Fibroblast	no		4052.14	-0.499249	0.227454	-2.19494	0.0281677	0.109496	not sig
ENSG00000102878	HSF4	16	67165082	67165211	Fibroblast.47XYY-Fibroblast.46XY	130	12	-54.4478	Promoter (<=1kb)	Hypo	heat shock transcription factor 4	ENSG00000102878.Promoter	Promoter	Fibroblast	no		228.15	-0.832818	0.250904	-3.31927	0.000902537	0.00714297	down
ENSG00000102878	HSF4	16	67165688	67165752	Fibroblast.47XYY-Fibroblast.46XY	65	13	-57.851	Promoter (<=1kb)	Hypo	heat shock transcription factor 4	ENSG00000102878.Promoter	Promoter	Fibroblast	no		228.15	-0.832818	0.250904	-3.31927	0.000902537	0.00714297	down
ENSG00000102882	MAPK3	16	30121916	30122017	Fibroblast.47XYY-Fibroblast.46XY	102	18	114.874	Promoter (<=1kb)	Hyper	mitogen-activated protein kinase 3	ENSG00000102882.Promoter	Promoter	Fibroblast	no		2871.78	-0.573127	0.178369	-3.21314	0.00131291	0.00975377	not sig
ENSG00000102970	CCL17	16	57394561	57394672	Fibroblast.47XYY-Fibroblast.46XY	112	4	21.6397	Distal Intergenic	Hyper	C-C motif chemokine ligand 17	ENSG00000102970.Intergenic	Intergenic	Fibroblast	no
ENSG00000103056	SMPD3	16	68366721	68366864	Fibroblast.47XYY-Fibroblast.46XY	144	5	23.468	Intron (ENST00000219334/ENSG00000103056, intron 3 of 8)	Hyper	sphingomyelin phosphodiesterase 3	ENSG00000103056.GeneBody	GeneBody	Fibroblast	no
ENSG00000103174	NAGPA	16	5027984	5028040	Fibroblast.47XYY-Fibroblast.46XY	57	4	21.0584	Promoter (<=1kb)	Hyper	N-acetylglucosamine-1-phosphodiester alpha-N-acetylglucosaminidase	ENSG00000103174.Promoter	Promoter	Fibroblast	no		842.56	-0.394237	0.183322	-2.15052	0.0315142	0.119447	not sig
ENSG00000103197	TSC2	16	2085985	2086036	Fibroblast.47XYY-Fibroblast.46XY	52	4	17.8019	Promoter (<=1kb)	Hyper	TSC complex subunit 2	ENSG00000103197.Promoter	Promoter	Fibroblast	no		4265.23	-0.199294	0.193494	-1.02998	0.303022	0.543057	not sig
ENSG00000103200		7	140425446	140425580	Fibroblast.47XYY-Fibroblast.46XY	135	8	47.2512	Intron (ENST00000537763/ENSG00000146955, intron 3 of 3)	Hyper		ENSG00000103200.GeneBody	GeneBody	Fibroblast	no
ENSG00000103245	CIAO3	16	737646	737739	Fibroblast.47XYY-Fibroblast.46XY	94	4	-27.0474	Promoter (<=1kb)	Hypo	cytosolic iron-sulfur assembly component 3	ENSG00000103245.Promoter	Promoter	Fibroblast	no		530.612	-0.266869	0.162439	-1.64289	0.100406	0.273231	not sig
ENSG00000103319	EEF2K	16	22209324	22209417	Fibroblast.47XYY-Fibroblast.46XY	94	5	24.9993	Promoter (2-3kb)	Hyper	eukaryotic elongation factor 2 kinase	ENSG00000103319.Promoter	Promoter	Fibroblast	no		1837.3	-0.0346911	0.175991	-0.197118	0.843735	0.923355	not sig
ENSG00000103335	PIEZO1	16	88719148	88719249	Fibroblast.47XYY-Fibroblast.46XY	102	7	32.8421	Promoter (<=1kb)	Hyper	piezo type mechanosensitive ion channel component 1	ENSG00000103335.Promoter	Promoter	Fibroblast	no		13296.4	-0.592201	0.194663	-3.04219	0.00234867	0.0157816	down
ENSG00000103335	PIEZO1	16	88788769	88788839	Fibroblast.47XYY-Fibroblast.46XY	71	4	18.0914	Distal Intergenic	Hyper	piezo type mechanosensitive ion channel component 1	ENSG00000103335.Intergenic	Intergenic	Fibroblast	no		13296.4	-0.592201	0.194663	-3.04219	0.00234867	0.0157816	down
ENSG00000103460	TOX3	16	52505022	52505129	Fibroblast.47XYY-Fibroblast.46XY	108	7	38.088	Intron (ENST00000219746/ENSG00000103460, intron 1 of 6)	Hyper	TOX high mobility group box family member 3	ENSG00000103460.GeneBody	GeneBody	Fibroblast	no
ENSG00000103510	KAT8	16	31129799	31129946	Fibroblast.47XYY-Fibroblast.46XY	148	17	83.4835	Promoter (<=1kb)	Hyper	lysine acetyltransferase 8	ENSG00000103510.Promoter	Promoter	Fibroblast	no		920.791	0.206808	0.133104	1.55373	0.120248	0.306143	not sig
ENSG00000103647	CORO2B	15	68577489	68577539	Fibroblast.47XYY-Fibroblast.46XY	51	9	-39.7086	Promoter (1-2kb)	Hypo	coronin 2B	ENSG00000103647.Promoter	Promoter	Fibroblast	no		561.546	-0.0681143	0.195034	-0.349244	0.726906	0.85993	not sig
ENSG00000103647	CORO2B	15	68560962	68561085	Fibroblast.47XYY-Fibroblast.46XY	124	6	-29.6902	Distal Intergenic	Hypo	coronin 2B	ENSG00000103647.Intergenic	Intergenic	Fibroblast	no		561.546	-0.0681143	0.195034	-0.349244	0.726906	0.85993	not sig
ENSG00000103647	CORO2B	15	68673401	68673559	Fibroblast.47XYY-Fibroblast.46XY	159	4	26.7012	Intron (ENST00000261861/ENSG00000103647, intron 2 of 11)	Hyper	coronin 2B	ENSG00000103647.GeneBody	GeneBody	Fibroblast	no		561.546	-0.0681143	0.195034	-0.349244	0.726906	0.85993	not sig
ENSG00000103994	ZNF106	15	42489756	42489892	Fibroblast.47XYY-Fibroblast.46XY	137	6	34.6881	Promoter (<=1kb)	Hyper	zinc finger protein 106	ENSG00000103994.Promoter	Promoter	Fibroblast	no		4069.08	-0.37842	0.108552	-3.48606	0.000490191	0.00428175	not sig
ENSG00000104044	OCA2	15	28055774	28055891	Fibroblast.47XYY-Fibroblast.46XY	118	4	19.4067	Intron (ENST00000353809/ENSG00000104044, intron 2 of 22)	Hyper	OCA2 melanosomal transmembrane protein	ENSG00000104044.GeneBody	GeneBody	Fibroblast	no
ENSG00000104059	ENTREP2	15	29203151	29203262	Fibroblast.47XYY-Fibroblast.46XY	112	15	70.712	Intron (ENST00000261275/ENSG00000104059, intron 3 of 10)	Hyper	endosomal transmembrane epsin interactor 2	ENSG00000104059.GeneBody	GeneBody	Fibroblast	no
ENSG00000104067	TJP1	15	29977018	29977079	Fibroblast.47XYY-Fibroblast.46XY	62	9	41.3434	Distal Intergenic	Hyper	tight junction protein 1	ENSG00000104067.Intergenic	Intergenic	Fibroblast	no		4176.71	-0.0522931	0.14891	-0.351173	0.725459	0.858731	not sig
ENSG00000104299	INTS9	8	28778500	28778592	Fibroblast.47XYY-Fibroblast.46XY	93	10	-50.8957	Promoter (2-3kb)	Hypo	integrator complex subunit 9	ENSG00000104299.Promoter	Promoter	Fibroblast	no		509.814	-0.128391	0.0874259	-1.46857	0.14195	0.341098	not sig
ENSG00000104321	TRPA1	8	72005179	72005292	Fibroblast.47XYY-Fibroblast.46XY	114	12	-64.3302	Intron (ENST00000522519/ENSG00000235531, intron 4 of 4)	Hypo	transient receptor potential cation channel subfamily A member 1	ENSG00000104321.GeneBody	GeneBody	Fibroblast	no
ENSG00000104325	DECR1	8	90012371	90012448	Fibroblast.47XYY-Fibroblast.46XY	78	7	39.4639	Intron (ENST00000519328/ENSG00000104325, intron 1 of 7)	Hyper	2,4-dienoyl-CoA reductase 1	ENSG00000104325.GeneBody	GeneBody	Fibroblast	no		2049.02	0.34915	0.112919	3.09203	0.00198792	0.0137341	not sig
ENSG00000104356	POP1	8	98118585	98120941	Fibroblast.47XYY-Fibroblast.46XY	2357	14	79.5591	Promoter (<=1kb)	Hyper	POP1 homolog, ribonuclease P/MRP subunit	ENSG00000104356.Promoter	Promoter	Fibroblast	no		694.66	-0.63815	0.228333	-2.79482	0.00519284	0.0296807	down
ENSG00000104375	STK3	8	98382702	98382814	Fibroblast.47XYY-Fibroblast.46XY	113	11	52.3931	Intron (ENST00000649151/ENSG00000104375, intron 4 of 5)	Hyper	serine/threonine kinase 3	ENSG00000104375.GeneBody	GeneBody	Fibroblast	no		922.943	-0.0655943	0.147369	-0.445101	0.656247	0.819833	not sig
ENSG00000104415	CCN4	8	133192827	133192894	Fibroblast.47XYY-Fibroblast.46XY	68	4	17.2206	Promoter (1-2kb)	Hyper	cellular communication network factor 4	ENSG00000104415.Promoter	Promoter	Fibroblast	no		3259.69	1.0855	0.508645	2.1341	0.0328344	0.122655	not sig
ENSG00000104518	GSDMD	8	143552184	143552310	Fibroblast.47XYY-Fibroblast.46XY	127	4	23.6548	Promoter (<=1kb)	Hyper	gasdermin D	ENSG00000104518.Promoter	Promoter	Fibroblast	no		1282.95	-0.0693211	0.176941	-0.391774	0.695225	0.841726	not sig
ENSG00000104728	ARHGEF10	8	1856773	1856832	Fibroblast.47XYY-Fibroblast.46XY	60	5	22.2807	Promoter (1-2kb)	Hyper	Rho guanine nucleotide exchange factor 10	ENSG00000104728.Promoter	Promoter	Fibroblast	no		59.9172	-0.446241	0.238145	-1.87382	0.0609554	0.192714	not sig
ENSG00000104853	CLPTM1	19	44985595	44985675	Fibroblast.47XYY-Fibroblast.46XY	81	4	19.9576	Promoter (1-2kb)	Hyper	CLPTM1 regulator of GABA type A receptor forward trafficking	ENSG00000104853.Promoter	Promoter	Fibroblast	no		5036.59	-0.217357	0.138558	-1.5687	0.116717	0.30088	not sig
ENSG00000104853	CLPTM1	19	44988363	44988471	Fibroblast.47XYY-Fibroblast.46XY	109	4	25.6869	Promoter (1-2kb)	Hyper	CLPTM1 regulator of GABA type A receptor forward trafficking	ENSG00000104853.Promoter	Promoter	Fibroblast	no		5036.59	-0.217357	0.138558	-1.5687	0.116717	0.30088	not sig
ENSG00000104883	PEX11G	19	7478478	7478842	Fibroblast.47XYY-Fibroblast.46XY	365	23	130.888	Intron (ENST00000221480/ENSG00000104883, intron 3 of 4)	Hyper	peroxisomal biogenesis factor 11 gamma	ENSG00000104883.GeneBody	GeneBody	Fibroblast	no
ENSG00000104897	SF3A2	19	2240994	2241130	Fibroblast.47XYY-Fibroblast.46XY	137	13	64.3521	Promoter (2-3kb)	Hyper	splicing factor 3a subunit 2	ENSG00000104897.Promoter	Promoter	Fibroblast	no		2246.97	-0.0276991	0.129744	-0.21349	0.830945	0.915025	not sig
ENSG00000104904	OAZ1	19	2274693	2274798	Fibroblast.47XYY-Fibroblast.46XY	106	10	46.3323	Promoter (2-3kb)	Hyper	ornithine decarboxylase antizyme 1	ENSG00000104904.Promoter	Promoter	Fibroblast	no		17931.6	-0.190805	0.120684	-1.58103	0.11387	0.296027	not sig
ENSG00000104953	TLE6	19	2975805	2976101	Fibroblast.47XYY-Fibroblast.46XY	297	21	148.667	Promoter (1-2kb)	Hyper	TLE family member 6, subcortical maternal complex member	ENSG00000104953.Promoter	Promoter	Fibroblast	no
ENSG00000104969	SGTA	19	2768805	2768935	Fibroblast.47XYY-Fibroblast.46XY	131	11	56.3431	Promoter (1-2kb)	Hyper	small glutamine rich tetratricopeptide repeat co-chaperone alpha	ENSG00000104969.Promoter	Promoter	Fibroblast	no		2569.82	0.0455944	0.102515	0.44476	0.656493	0.819833	not sig
ENSG00000104969	SGTA	19	2770962	2771017	Fibroblast.47XYY-Fibroblast.46XY	56	10	-41.7288	Promoter (<=1kb)	Hypo	small glutamine rich tetratricopeptide repeat co-chaperone alpha	ENSG00000104969.Promoter	Promoter	Fibroblast	no		2569.82	0.0455944	0.102515	0.44476	0.656493	0.819833	not sig
ENSG00000104969	SGTA	19	2759242	2759337	Fibroblast.47XYY-Fibroblast.46XY	96	5	-27.1212	Promoter (<=1kb)	Hypo	small glutamine rich tetratricopeptide repeat co-chaperone alpha	ENSG00000104969.Promoter	Promoter	Fibroblast	no		2569.82	0.0455944	0.102515	0.44476	0.656493	0.819833	not sig
ENSG00000105053	VRK3	19	49988131	49988190	Fibroblast.47XYY-Fibroblast.46XY	60	4	18.8012	3' UTR	Hyper	VRK serine/threonine kinase 3	ENSG00000105053.GeneBody	GeneBody	Fibroblast	no		1006.58	-0.117715	0.149385	-0.788	0.430697	0.661313	not sig
ENSG00000105063	PPP6R1	19	55261168	55261302	Fibroblast.47XYY-Fibroblast.46XY	135	4	24.5298	Promoter (2-3kb)	Hyper	protein phosphatase 6 regulatory subunit 1	ENSG00000105063.Promoter	Promoter	Fibroblast	no		3705.64	-0.151434	0.136459	-1.10974	0.267109	0.503819	not sig
ENSG00000105088	OLFM2	19	9881363	9881518	Fibroblast.47XYY-Fibroblast.46XY	156	5	27.5221	Intron (ENST00000264833/ENSG00000105088, intron 1 of 5)	Hyper	olfactomedin 2	ENSG00000105088.GeneBody	GeneBody	Fibroblast	no		2034.41	1.39018	0.499055	2.78563	0.00534245	0.0304568	up
ENSG00000105088	OLFM2	19	9869160	9869285	Fibroblast.47XYY-Fibroblast.46XY	126	5	27.8922	Intron (ENST00000264833/ENSG00000105088, intron 1 of 5)	Hyper	olfactomedin 2	ENSG00000105088.GeneBody	GeneBody	Fibroblast	no		2034.41	1.39018	0.499055	2.78563	0.00534245	0.0304568	up
ENSG00000105088	OLFM2	19	9932324	9932378	Fibroblast.47XYY-Fibroblast.46XY	55	7	31.6177	Intron (ENST00000264833/ENSG00000105088, intron 1 of 5)	Hyper	olfactomedin 2	ENSG00000105088.GeneBody	GeneBody	Fibroblast	no		2034.41	1.39018	0.499055	2.78563	0.00534245	0.0304568	up
ENSG00000105088	OLFM2	19	9919326	9919462	Fibroblast.47XYY-Fibroblast.46XY	137	8	36.0143	Intron (ENST00000264833/ENSG00000105088, intron 1 of 5)	Hyper	olfactomedin 2	ENSG00000105088.GeneBody	GeneBody	Fibroblast	no		2034.41	1.39018	0.499055	2.78563	0.00534245	0.0304568	up
ENSG00000105122	RASAL3	19	15463842	15463961	Fibroblast.47XYY-Fibroblast.46XY	120	4	20.131	Promoter (<=1kb)	Hyper	RAS protein activator like 3	ENSG00000105122.Promoter	Promoter	Fibroblast	no
ENSG00000105143	SLC1A6	19	14970481	14970567	Fibroblast.47XYY-Fibroblast.46XY	87	11	50.2549	Promoter (2-3kb)	Hyper	solute carrier family 1 member 6	ENSG00000105143.Promoter	Promoter	Fibroblast	no
ENSG00000105202	FBL	19	39850088	39850195	Fibroblast.47XYY-Fibroblast.46XY	108	4	18.6606	Distal Intergenic	Hyper	fibrillarin	ENSG00000105202.Intergenic	Intergenic	Fibroblast	no		2827.02	0.216461	0.162007	1.33612	0.18151	0.398729	not sig
ENSG00000105219	CCNP	19	40221740	40221911	Fibroblast.47XYY-Fibroblast.46XY	172	15	75.0332	Promoter (1-2kb)	Hyper	cyclin P	ENSG00000105219.Promoter	Promoter	Fibroblast	no
ENSG00000105251	SHD	19	4263983	4264078	Fibroblast.47XYY-Fibroblast.46XY	96	13	61.752	Intron (ENST00000262962/ENSG00000105248, intron 6 of 7)	Hyper	Src homology 2 domain containing transforming protein D	ENSG00000105251.GeneBody	GeneBody	Fibroblast	no
ENSG00000105278	ZFR2	19	3833297	3833402	Fibroblast.47XYY-Fibroblast.46XY	106	12	57.0727	Intron (ENST00000262961/ENSG00000105278, intron 3 of 18)	Hyper	zinc finger RNA binding protein 2	ENSG00000105278.GeneBody	GeneBody	Fibroblast	no
ENSG00000105278	ZFR2	19	3855638	3855691	Fibroblast.47XYY-Fibroblast.46XY	54	7	27.3365	Promoter (<=1kb)	Hyper	zinc finger RNA binding protein 2	ENSG00000105278.Promoter	Promoter	Fibroblast	no
ENSG00000105321	CCDC9	19	47258549	47258652	Fibroblast.47XYY-Fibroblast.46XY	104	10	55.0496	Promoter (<=1kb)	Hyper	coiled-coil domain containing 9	ENSG00000105321.Promoter	Promoter	Fibroblast	no		1436.91	0.163982	0.171407	0.956682	0.338728	0.579116	not sig
ENSG00000105339	DENND3	8	141206415	141206531	Fibroblast.47XYY-Fibroblast.46XY	117	10	34.0162	Distal Intergenic	Hyper	DENN domain containing 3	ENSG00000105339.Intergenic	Intergenic	Fibroblast	no		626.708	-1.27502	0.202788	-6.28747	3.22689e-10	1.27236e-08	down
ENSG00000105339	DENND3	8	141154067	141154199	Fibroblast.47XYY-Fibroblast.46XY	133	8	54.5913	Promoter (1-2kb)	Hyper	DENN domain containing 3	ENSG00000105339.Promoter	Promoter	Fibroblast	no		626.708	-1.27502	0.202788	-6.28747	3.22689e-10	1.27236e-08	down
ENSG00000105355	PLIN3	19	4865816	4866178	Fibroblast.47XYY-Fibroblast.46XY	363	38	286.445	Promoter (<=1kb)	Hyper	perilipin 3	ENSG00000105355.Promoter	Promoter	Fibroblast	no		9318.51	-0.16684	0.164097	-1.01672	0.309288	0.550221	not sig
ENSG00000105357	MYH14	19	50290861	50290949	Fibroblast.47XYY-Fibroblast.46XY	89	10	43.5338	3' UTR	Hyper	myosin heavy chain 14	ENSG00000105357.GeneBody	GeneBody	Fibroblast	no
ENSG00000105402	NAPA	19	47521880	47522065	Fibroblast.47XYY-Fibroblast.46XY	186	12	94.2422	Exon (ENST00000391901/ENSG00000118156, exon 13 of 15)	Hyper	NSF attachment protein alpha	ENSG00000105402.GeneBody	GeneBody	Fibroblast	no		2168.36	-0.51324	0.203262	-2.52502	0.0115691	0.0558538	not sig
ENSG00000105426	PTPRS	19	5206616	5206717	Fibroblast.47XYY-Fibroblast.46XY	102	12	44.7654	3' UTR	Hyper	protein tyrosine phosphatase receptor type S	ENSG00000105426.GeneBody	GeneBody	Fibroblast	no		2804.57	-0.197534	0.169895	-1.16269	0.244956	0.478855	not sig
ENSG00000105509	HAS1	19	51736063	51736185	Fibroblast.47XYY-Fibroblast.46XY	123	4	26.8209	Distal Intergenic	Hyper	hyaluronan synthase 1	ENSG00000105509.Intergenic	Intergenic	Fibroblast	no		39.5663	-0.63628	0.62373	-1.02012	0.307671	0.548868	not sig
ENSG00000105520	PLPPR2	19	11365722	11365795	Fibroblast.47XYY-Fibroblast.46XY	74	7	36.7833	Downstream (<=300bp)	Hyper	phospholipid phosphatase related 2	ENSG00000105520.Intergenic	Intergenic	Fibroblast	no		2788.45	-0.112653	0.146741	-0.767698	0.442667	0.670087	not sig
ENSG00000105538	RASIP1	19	48739547	48739654	Fibroblast.47XYY-Fibroblast.46XY	108	30	-118.999	Promoter (<=1kb)	Hypo	Ras interacting protein 1	ENSG00000105538.Promoter	Promoter	Fibroblast	no
ENSG00000105552	BCAT2	19	48796125	48796215	Fibroblast.47XYY-Fibroblast.46XY	91	5	25.303	Promoter (1-2kb)	Hyper	branched chain amino acid transaminase 2	ENSG00000105552.Promoter	Promoter	Fibroblast	no		856.732	-0.20771	0.110121	-1.8862	0.0592684	0.189192	not sig
ENSG00000105556	MIER2	19	343465	343623	Fibroblast.47XYY-Fibroblast.46XY	159	17	78.7031	Promoter (1-2kb)	Hyper	MIER family member 2	ENSG00000105556.Promoter	Promoter	Fibroblast	no		976.329	-0.0719955	0.195192	-0.368844	0.712244	0.851097	not sig
ENSG00000105576	TNPO2	19	12710068	12710142	Fibroblast.47XYY-Fibroblast.46XY	75	5	23.0746	Intron (ENST00000425528/ENSG00000105576, intron 13 of 25)	Hyper	transportin 2	ENSG00000105576.GeneBody	GeneBody	Fibroblast	no		4375.77	-0.137774	0.116866	-1.1789	0.238437	0.471032	not sig
ENSG00000105605	CACNG7	19	53904552	53904716	Fibroblast.47XYY-Fibroblast.46XY	165	8	45.0113	Exon (ENST00000263431/ENSG00000126583, exon 16 of 18)	Hyper	calcium voltage-gated channel auxiliary subunit gamma 7	ENSG00000105605.GeneBody	GeneBody	Fibroblast	no		27.6971	4.49305	1.25473	3.58089	0.00034243	0.00314545	up
ENSG00000105640	RPL18A	19	17861484	17861613	Fibroblast.47XYY-Fibroblast.46XY	130	16	72.8035	Promoter (<=1kb)	Hyper	ribosomal protein L18a	ENSG00000105640.Promoter	Promoter	Fibroblast	no		14773.7	0.0280739	0.165394	0.16974	0.865215	0.933668	not sig
ENSG00000105642	KCNN1	19	17963172	17963255	Fibroblast.47XYY-Fibroblast.46XY	84	11	59.4833	Intron (ENST00000222249/ENSG00000105642, intron 2 of 10)	Hyper	potassium calcium-activated channel subfamily N member 1	ENSG00000105642.GeneBody	GeneBody	Fibroblast	no
ENSG00000105656	ELL	19	18511877	18512011	Fibroblast.47XYY-Fibroblast.46XY	135	9	46.3043	Intron (ENST00000262809/ENSG00000105656, intron 1 of 11)	Hyper	elongation factor for RNA polymerase II	ENSG00000105656.GeneBody	GeneBody	Fibroblast	no		685.85	0.0975811	0.183126	0.532863	0.594128	0.779174	not sig
ENSG00000105662	CRTC1	19	18762314	18762411	Fibroblast.47XYY-Fibroblast.46XY	98	8	-38.3054	Intron (ENST00000338797/ENSG00000105662, intron 9 of 14)	Hypo	CREB regulated transcription coactivator 1	ENSG00000105662.GeneBody	GeneBody	Fibroblast	no		750.817	-0.345403	0.192936	-1.79024	0.0734146	0.220444	not sig
ENSG00000105694		19	2522500	2522608	Fibroblast.47XYY-Fibroblast.46XY	109	16	64.7966	Intron (ENST00000382159/ENSG00000176533, intron 3 of 4)	Hyper		ENSG00000105694.GeneBody	GeneBody	Fibroblast	no
ENSG00000105694		19	2547942	2547998	Fibroblast.47XYY-Fibroblast.46XY	57	5	23.6892	Intron (ENST00000382159/ENSG00000176533, intron 3 of 4)	Hyper		ENSG00000105694.GeneBody	GeneBody	Fibroblast	no
ENSG00000105700	KXD1	19	18560302	18560458	Fibroblast.47XYY-Fibroblast.46XY	157	6	31.4576	Promoter (1-2kb)	Hyper	KxDL motif containing 1	ENSG00000105700.Promoter	Promoter	Fibroblast	no		1794.62	0.0730033	0.0833431	0.875937	0.381064	0.617971	not sig
ENSG00000105737	GRIK5	19	42005793	42007282	Fibroblast.47XYY-Fibroblast.46XY	1490	6	28.4787	Promoter (2-3kb)	Hyper	glutamate ionotropic receptor kainate type subunit 5	ENSG00000105737.Promoter	Promoter	Fibroblast	no
ENSG00000105738	SIPA1L3	19	37932856	37932909	Fibroblast.47XYY-Fibroblast.46XY	54	4	-17.6882	Promoter (<=1kb)	Hypo	signal induced proliferation associated 1 like 3	ENSG00000105738.Promoter	Promoter	Fibroblast	no		1385.3	-0.278512	0.222004	-1.25453	0.209648	0.435826	not sig
ENSG00000105738	SIPA1L3	19	38173581	38173698	Fibroblast.47XYY-Fibroblast.46XY	118	6	26.5538	Promoter (<=1kb)	Hyper	signal induced proliferation associated 1 like 3	ENSG00000105738.Promoter	Promoter	Fibroblast	no		1385.3	-0.278512	0.222004	-1.25453	0.209648	0.435826	not sig
ENSG00000105771	SMG9	19	43727487	43729076	Fibroblast.47XYY-Fibroblast.46XY	1590	7	22.0877	3' UTR	Hyper	SMG9 nonsense mediated mRNA decay factor	ENSG00000105771.GeneBody	GeneBody	Fibroblast	no		1830.7	-0.0615474	0.132431	-0.46475	0.642111	0.810774	not sig
ENSG00000105835	NAMPT	7	106299315	106299369	Fibroblast.47XYY-Fibroblast.46XY	55	5	26.757	Distal Intergenic	Hyper	nicotinamide phosphoribosyltransferase	ENSG00000105835.Intergenic	Intergenic	Fibroblast	no		1849.56	0.0382049	0.199559	0.191447	0.848176	0.925577	not sig
ENSG00000105855	ITGB8	7	20336165	20336300	Fibroblast.47XYY-Fibroblast.46XY	136	14	76.1927	Intron (ENST00000537992/ENSG00000105855, intron 2 of 14)	Hyper	integrin subunit beta 8	ENSG00000105855.GeneBody	GeneBody	Fibroblast	no		360.927	1.29833	0.441867	2.93828	0.00330044	0.0206487	up
ENSG00000105877	DNAH11	7	21734892	21735026	Fibroblast.47XYY-Fibroblast.46XY	135	8	42.3451	Promoter (<=1kb)	Hyper	dynein axonemal heavy chain 11	ENSG00000105877.Promoter	Promoter	Fibroblast	no
ENSG00000105887	MTPN	7	135981854	135981989	Fibroblast.47XYY-Fibroblast.46XY	136	8	44.731	Distal Intergenic	Hyper	myotrophin	ENSG00000105887.Intergenic	Intergenic	Fibroblast	no		11903.4	-0.226014	0.185326	-1.21955	0.222636	0.452215	not sig
ENSG00000105929	ATP6V0A4	7	138833122	138838013	Fibroblast.47XYY-Fibroblast.46XY	4892	10	48.2943	3' UTR	Hyper	ATPase H+ transporting V0 subunit a4	ENSG00000105929.GeneBody	GeneBody	Fibroblast	no
ENSG00000105963	ADAP1	7	920700	920832	Fibroblast.47XYY-Fibroblast.46XY	133	12	63.6933	Promoter (<=1kb)	Hyper	ArfGAP with dual PH domains 1	ENSG00000105963.Promoter	Promoter	Fibroblast	no
ENSG00000105982	RNF32	7	156639922	156639995	Fibroblast.47XYY-Fibroblast.46XY	74	17	69.4336	Promoter (<=1kb)	Hyper	ring finger protein 32	ENSG00000105982.Promoter	Promoter	Fibroblast	no
ENSG00000106003	LFNG	7	2503159	2503235	Fibroblast.47XYY-Fibroblast.46XY	77	8	34.7464	Distal Intergenic	Hyper	LFNG O-fucosylpeptide 3-beta-N-acetylglucosaminyltransferase	ENSG00000106003.Intergenic	Intergenic	Fibroblast	no		588.994	-1.75078	0.290637	-6.02393	1.70233e-09	5.81035e-08	down
ENSG00000106089	STX1A	7	73704728	73706096	Fibroblast.47XYY-Fibroblast.46XY	1369	18	-92.2338	Promoter (<=1kb)	Hypo	syntaxin 1A	ENSG00000106089.Promoter	Promoter	Fibroblast	no		542.638	0.769027	0.203363	3.78154	0.000155861	0.00160091	up
ENSG00000106089	STX1A	7	73716125	73716244	Fibroblast.47XYY-Fibroblast.46XY	120	12	-53.358	Intron (ENST00000395156/ENSG00000106089, intron 1 of 9)	Hypo	syntaxin 1A	ENSG00000106089.GeneBody	GeneBody	Fibroblast	no		542.638	0.769027	0.203363	3.78154	0.000155861	0.00160091	up
ENSG00000106128	GHRHR	7	30998296	30998421	Fibroblast.47XYY-Fibroblast.46XY	126	6	33.9215	Distal Intergenic	Hyper	growth hormone releasing hormone receptor	ENSG00000106128.Intergenic	Intergenic	Fibroblast	no
ENSG00000106236	NPTX2	7	98675052	98675120	Fibroblast.47XYY-Fibroblast.46XY	69	6	28.1451	Distal Intergenic	Hyper	neuronal pentraxin 2	ENSG00000106236.Intergenic	Intergenic	Fibroblast	no		33.4262	3.2032	0.39248	8.16144	3.31063e-16	3.28797e-14	up
ENSG00000106263	EIF3B	7	2356333	2356458	Fibroblast.47XYY-Fibroblast.46XY	126	14	70.3737	Promoter (1-2kb)	Hyper	eukaryotic translation initiation factor 3 subunit B	ENSG00000106263.Promoter	Promoter	Fibroblast	no		8719.59	-0.160258	0.171886	-0.932351	0.351155	0.590729	not sig
ENSG00000106346	USP42	7	6103861	6104016	Fibroblast.47XYY-Fibroblast.46XY	156	17	81.9704	Promoter (<=1kb)	Hyper	ubiquitin specific peptidase 42	ENSG00000106346.Promoter	Promoter	Fibroblast	no		696.689	0.14443	0.178311	0.809989	0.417946	0.652405	not sig
ENSG00000106346	USP42	7	6092802	6094116	Fibroblast.47XYY-Fibroblast.46XY	1315	5	24.0821	Exon (ENST00000435547/ENSG00000231704, exon 4 of 4)	Hyper	ubiquitin specific peptidase 42	ENSG00000106346.GeneBody	GeneBody	Fibroblast	no		696.689	0.14443	0.178311	0.809989	0.417946	0.652405	not sig
ENSG00000106366	SERPINE1	7	101139292	101139457	Fibroblast.47XYY-Fibroblast.46XY	166	6	29.2258	Downstream (<=300bp)	Hyper	serpin family E member 1	ENSG00000106366.Intergenic	Intergenic	Fibroblast	no		90648.6	-0.235554	0.197402	-1.19327	0.232763	0.465069	not sig
ENSG00000106436	MYL10	7	101644946	101645160	Fibroblast.47XYY-Fibroblast.46XY	215	25	139.703	Distal Intergenic	Hyper	myosin light chain 10	ENSG00000106436.Intergenic	Intergenic	Fibroblast	no
ENSG00000106571	GLI3	7	42357523	42357658	Fibroblast.47XYY-Fibroblast.46XY	136	12	58.5366	Distal Intergenic	Hyper	GLI family zinc finger 3	ENSG00000106571.Intergenic	Intergenic	Fibroblast	no		2549.07	-0.360818	0.196238	-1.83868	0.0659628	0.204126	not sig
ENSG00000106610	STAG3L4	7	67357211	67357286	Fibroblast.47XYY-Fibroblast.46XY	76	11	51.8083	Intron (ENST00000647855/ENSG00000106610, intron 9 of 9)	Hyper	stromal antigen 3-like 4 (pseudogene)	ENSG00000106610.GeneBody	GeneBody	Fibroblast	no		393.735	0.323646	0.127474	2.53893	0.0111193	0.0541774	not sig
ENSG00000106648	GALNTL5	7	151963968	151964059	Fibroblast.47XYY-Fibroblast.46XY	92	5	25.3971	Intron (ENST00000431418/ENSG00000106648, intron 2 of 9)	Hyper	polypeptide N-acetylgalactosaminyltransferase like 5	ENSG00000106648.GeneBody	GeneBody	Fibroblast	no
ENSG00000106665	CLIP2	7	74417699	74417806	Fibroblast.47XYY-Fibroblast.46XY	108	4	25.3068	Distal Intergenic	Hyper	CAP-Gly domain containing linker protein 2	ENSG00000106665.Intergenic	Intergenic	Fibroblast	no		3233.87	-0.198033	0.14923	-1.32703	0.184498	0.402683	not sig
ENSG00000106688	SLC1A1	9	4549181	4549314	Fibroblast.47XYY-Fibroblast.46XY	134	6	-40.257	Intron (ENST00000262352/ENSG00000106688, intron 2 of 11)	Hypo	solute carrier family 1 member 1	ENSG00000106688.GeneBody	GeneBody	Fibroblast	no		1005.34	-0.107115	0.2678	-0.399981	0.68917	0.837979	not sig
ENSG00000106689	LHX2	9	124012559	124013214	Fibroblast.47XYY-Fibroblast.46XY	656	55	-309.566	Promoter (<=1kb)	Hypo	LIM homeobox 2	ENSG00000106689.Promoter	Promoter	Fibroblast	no
ENSG00000106714	CNTNAP3	9	39058433	39058636	Fibroblast.47XYY-Fibroblast.46XY	204	16	77.7674	Distal Intergenic	Hyper	contactin associated protein family member 3	ENSG00000106714.Intergenic	Intergenic	Fibroblast	no		32.0346	22.6601	2.63979	8.58406	9.15813e-18	1.15209e-15	up
ENSG00000106772	PRUNE2	9	76666127	76666213	Fibroblast.47XYY-Fibroblast.46XY	87	10	43.6912	Intron (ENST00000376717/ENSG00000106772, intron 1 of 10)	Hyper	prune homolog 2 with BCH domain	ENSG00000106772.GeneBody	GeneBody	Fibroblast	no		2079.37	2.10529	0.324694	6.48392	8.93721e-11	3.93505e-09	up
ENSG00000106809	OGN	9	92394640	92394697	Fibroblast.47XYY-Fibroblast.46XY	58	6	30.769	Promoter (1-2kb)	Hyper	osteoglycin	ENSG00000106809.Promoter	Promoter	Fibroblast	no		141.687	-0.370352	1.08941	-0.339955	0.73389	0.864374	not sig
ENSG00000107130	NCS1	9	130175429	130175483	Fibroblast.47XYY-Fibroblast.46XY	55	4	-18.2728	Intron (ENST00000372398/ENSG00000107130, intron 1 of 7)	Hypo	neuronal calcium sensor 1	ENSG00000107130.GeneBody	GeneBody	Fibroblast	no		3958.65	-0.142396	0.132171	-1.07736	0.281319	0.519957	not sig
ENSG00000107147	KCNT1	9	135797090	135797271	Fibroblast.47XYY-Fibroblast.46XY	182	19	118.048	Distal Intergenic	Hyper	potassium sodium-activated channel subfamily T member 1	ENSG00000107147.Intergenic	Intergenic	Fibroblast	no
ENSG00000107518	ATRNL1	10	115881317	115881413	Fibroblast.47XYY-Fibroblast.46XY	97	6	33.7788	Intron (ENST00000355044/ENSG00000107518, intron 28 of 28)	Hyper	attractin like 1	ENSG00000107518.GeneBody	GeneBody	Fibroblast	no
ENSG00000107771	CCSER2	10	84327138	84327274	Fibroblast.47XYY-Fibroblast.46XY	137	6	34.4617	Promoter (1-2kb)	Hyper	coiled-coil serine rich protein 2	ENSG00000107771.Promoter	Promoter	Fibroblast	no		3039.29	-0.185159	0.123327	-1.50136	0.133262	0.326822	not sig
ENSG00000107859	PITX3	10	102240630	102240797	Fibroblast.47XYY-Fibroblast.46XY	168	27	-165.636	Promoter (<=1kb)	Hypo	paired like homeodomain 3	ENSG00000107859.Promoter	Promoter	Fibroblast	no
ENSG00000108001	EBF3	10	129943110	129943207	Fibroblast.47XYY-Fibroblast.46XY	98	4	21.278	Intron (ENST00000440978/ENSG00000108001, intron 6 of 16)	Hyper	EBF transcription factor 3	ENSG00000108001.GeneBody	GeneBody	Fibroblast	no		198.894	1.73068	0.456368	3.7923	0.000149261	0.00154635	up
ENSG00000108175	ZMIZ1	10	79299584	79299676	Fibroblast.47XYY-Fibroblast.46XY	93	4	22.148	Intron (ENST00000334512/ENSG00000108175, intron 16 of 24)	Hyper	zinc finger MIZ-type containing 1	ENSG00000108175.GeneBody	GeneBody	Fibroblast	no		10792	-0.124483	0.186224	-0.668459	0.50384	0.717777	not sig
ENSG00000108175	ZMIZ1	10	79134077	79134165	Fibroblast.47XYY-Fibroblast.46XY	89	4	-19.3186	Intron (ENST00000334512/ENSG00000108175, intron 2 of 24)	Hypo	zinc finger MIZ-type containing 1	ENSG00000108175.GeneBody	GeneBody	Fibroblast	no		10792	-0.124483	0.186224	-0.668459	0.50384	0.717777	not sig
ENSG00000108175	ZMIZ1	10	79094241	79094338	Fibroblast.47XYY-Fibroblast.46XY	98	12	61.6556	Intron (ENST00000334512/ENSG00000108175, intron 1 of 24)	Hyper	zinc finger MIZ-type containing 1	ENSG00000108175.GeneBody	GeneBody	Fibroblast	no		10792	-0.124483	0.186224	-0.668459	0.50384	0.717777	not sig
ENSG00000108175	ZMIZ1	10	79265068	79265149	Fibroblast.47XYY-Fibroblast.46XY	82	7	28.5179	Intron (ENST00000334512/ENSG00000108175, intron 7 of 24)	Hyper	zinc finger MIZ-type containing 1	ENSG00000108175.GeneBody	GeneBody	Fibroblast	no		10792	-0.124483	0.186224	-0.668459	0.50384	0.717777	not sig
ENSG00000108175	ZMIZ1	10	79266517	79266623	Fibroblast.47XYY-Fibroblast.46XY	107	7	34.6175	Intron (ENST00000334512/ENSG00000108175, intron 7 of 24)	Hyper	zinc finger MIZ-type containing 1	ENSG00000108175.GeneBody	GeneBody	Fibroblast	no		10792	-0.124483	0.186224	-0.668459	0.50384	0.717777	not sig
ENSG00000108349	CASC3	17	40139620	40139758	Fibroblast.47XYY-Fibroblast.46XY	139	9	41.8119	Promoter (<=1kb)	Hyper	CASC3 exon junction complex subunit	ENSG00000108349.Promoter	Promoter	Fibroblast	no		4604.33	0.0412974	0.153551	0.268949	0.787969	0.894827	not sig
ENSG00000108370	RGS9	17	65080789	65080923	Fibroblast.47XYY-Fibroblast.46XY	135	14	66.2613	Distal Intergenic	Hyper	regulator of G protein signaling 9	ENSG00000108370.Intergenic	Intergenic	Fibroblast	no		58.8238	1.16836	0.375133	3.11453	0.00184237	0.0129309	up
ENSG00000108395	TRIM37	17	58995089	58995181	Fibroblast.47XYY-Fibroblast.46XY	93	4	23.004	Intron (ENST00000585287/ENSG00000108395, intron 4 of 4)	Hyper	tripartite motif containing 37	ENSG00000108395.GeneBody	GeneBody	Fibroblast	no		1602.23	-0.121514	0.118297	-1.02719	0.304333	0.54478	not sig
ENSG00000108511	HOXB6	17	48602997	48604021	Fibroblast.47XYY-Fibroblast.46XY	1025	19	-121.94	Promoter (<=1kb)	Hypo	homeobox B6	ENSG00000108511.Promoter	Promoter	Fibroblast	no		433.605	0.767668	0.348656	2.20179	0.02768	0.108045	not sig
ENSG00000108556	CHRNE	17	4935335	4935441	Fibroblast.47XYY-Fibroblast.46XY	107	5	40.0464	Promoter (<=1kb)	Hyper	cholinergic receptor nicotinic epsilon subunit	ENSG00000108556.Promoter	Promoter	Fibroblast	no		40.5484	-2.26918	0.359844	-6.30601	2.86325e-10	1.14262e-08	down
ENSG00000108557	RAI1	17	17793071	17793232	Fibroblast.47XYY-Fibroblast.46XY	162	24	-115.695	Promoter (<=1kb)	Hypo	retinoic acid induced 1	ENSG00000108557.Promoter	Promoter	Fibroblast	no		2394.8	-0.1876	0.151994	-1.23426	0.217106	0.445441	not sig
ENSG00000108651	UTP6	17	31895693	31895829	Fibroblast.47XYY-Fibroblast.46XY	137	8	43.5661	Intron (ENST00000261708/ENSG00000108651, intron 2 of 18)	Hyper	UTP6 small subunit processome component	ENSG00000108651.GeneBody	GeneBody	Fibroblast	no		1919.83	-0.0885869	0.153526	-0.577014	0.56393	0.759864	not sig
ENSG00000108669	CYTH1	17	78757652	78757739	Fibroblast.47XYY-Fibroblast.46XY	88	4	18.2057	Intron (ENST00000591455/ENSG00000108669, intron 1 of 12)	Hyper	cytohesin 1	ENSG00000108669.GeneBody	GeneBody	Fibroblast	no		1156.86	-0.31647	0.179342	-1.76462	0.0776274	0.229597	not sig
ENSG00000108679	LGALS3BP	17	78981610	78981662	Fibroblast.47XYY-Fibroblast.46XY	53	7	-39.1674	Promoter (1-2kb)	Hypo	galectin 3 binding protein	ENSG00000108679.Promoter	Promoter	Fibroblast	no		3868.98	-0.829687	0.304425	-2.72542	0.00642188	0.0352563	down
ENSG00000108684	ASIC2	17	33290547	33290640	Fibroblast.47XYY-Fibroblast.46XY	94	6	-33.4716	Promoter (<=1kb)	Hypo	acid sensing ion channel subunit 2	ENSG00000108684.Promoter	Promoter	Fibroblast	no
ENSG00000108785		17	42548337	42548586	Fibroblast.47XYY-Fibroblast.46XY	250	45	-222.024	Promoter (1-2kb)	Hypo		ENSG00000108785.Promoter	Promoter	Fibroblast	no
ENSG00000108840	HDAC5	17	44097602	44097703	Fibroblast.47XYY-Fibroblast.46XY	102	8	40.2576	Intron (ENST00000225983/ENSG00000108840, intron 3 of 26)	Hyper	histone deacetylase 5	ENSG00000108840.GeneBody	GeneBody	Fibroblast	no		4669.53	-0.315859	0.15983	-1.97622	0.0481304	0.163349	not sig
ENSG00000108947	EFNB3	17	7705885	7705979	Fibroblast.47XYY-Fibroblast.46XY	95	6	-32.1918	Promoter (<=1kb)	Hypo	ephrin B3	ENSG00000108947.Promoter	Promoter	Fibroblast	no		263.453	0.182402	0.207424	0.879369	0.379201	0.616394	not sig
ENSG00000109101	FOXN1	17	28506359	28506411	Fibroblast.47XYY-Fibroblast.46XY	53	9	48.3761	Promoter (<=1kb)	Hyper	forkhead box N1	ENSG00000109101.Promoter	Promoter	Fibroblast	no
ENSG00000109265	CRACD	4	56160023	56160076	Fibroblast.47XYY-Fibroblast.46XY	54	8	36.6942	Intron (ENST00000629263/ENSG00000109265, intron 1 of 4)	Hyper	capping protein inhibiting regulator of actin dynamics	ENSG00000109265.GeneBody	GeneBody	Fibroblast	no
ENSG00000109265	CRACD	4	56070233	56070368	Fibroblast.47XYY-Fibroblast.46XY	136	7	33.7786	Intron (ENST00000629263/ENSG00000109265, intron 1 of 4)	Hyper	capping protein inhibiting regulator of actin dynamics	ENSG00000109265.GeneBody	GeneBody	Fibroblast	no
ENSG00000109332	UBE2D3	4	102868229	102868363	Fibroblast.47XYY-Fibroblast.46XY	135	18	88.5136	Promoter (<=1kb)	Hyper	ubiquitin conjugating enzyme E2 D3	ENSG00000109332.Promoter	Promoter	Fibroblast	no		10013	-0.186759	0.181454	-1.02924	0.303368	0.543436	not sig
ENSG00000109618	SEPSECS	4	25095963	25096071	Fibroblast.47XYY-Fibroblast.46XY	109	12	56.0042	Distal Intergenic	Hyper	Sep (O-phosphoserine) tRNA:Sec (selenocysteine) tRNA synthase	ENSG00000109618.Intergenic	Intergenic	Fibroblast	no		392.711	-0.142106	0.199306	-0.713006	0.475842	0.696212	not sig
ENSG00000109625	CPZ	4	8588363	8588482	Fibroblast.47XYY-Fibroblast.46XY	120	4	20.6622	3' UTR	Hyper	carboxypeptidase Z	ENSG00000109625.GeneBody	GeneBody	Fibroblast	no
ENSG00000109684	CLNK	4	10562624	10562699	Fibroblast.47XYY-Fibroblast.46XY	76	7	37.1336	Intron (ENST00000226951/ENSG00000109684, intron 7 of 18)	Hyper	cytokine dependent hematopoietic cell linker	ENSG00000109684.GeneBody	GeneBody	Fibroblast	no
ENSG00000109689	STIM2	4	26858668	26858781	Fibroblast.47XYY-Fibroblast.46XY	114	4	-18.3587	Promoter (<=1kb)	Hypo	stromal interaction molecule 2	ENSG00000109689.Promoter	Promoter	Fibroblast	no		818.35	-0.151714	0.16152	-0.93929	0.347582	0.587487	not sig
ENSG00000110047	EHD1	11	64864165	64864386	Fibroblast.47XYY-Fibroblast.46XY	222	13	73.1055	Intron (ENST00000320631/ENSG00000110047, intron 2 of 4)	Hyper	EH domain containing 1	ENSG00000110047.GeneBody	GeneBody	Fibroblast	no		4931	-0.389852	0.201793	-1.93194	0.0533667	0.175834	not sig
ENSG00000110047	EHD1	11	64856603	64856752	Fibroblast.47XYY-Fibroblast.46XY	150	7	37.7114	Promoter (<=1kb)	Hyper	EH domain containing 1	ENSG00000110047.Promoter	Promoter	Fibroblast	no		4931	-0.389852	0.201793	-1.93194	0.0533667	0.175834	not sig
ENSG00000110066	KMT5B	11	68214729	68214825	Fibroblast.47XYY-Fibroblast.46XY	97	9	41.8592	Promoter (<=1kb)	Hyper	lysine methyltransferase 5B	ENSG00000110066.Promoter	Promoter	Fibroblast	no		1672.95	0.322756	0.200081	1.61313	0.106717	0.284463	not sig
ENSG00000110066	KMT5B	11	68167925	68168033	Fibroblast.47XYY-Fibroblast.46XY	109	5	25.057	Intron (ENST00000304363/ENSG00000110066, intron 9 of 10)	Hyper	lysine methyltransferase 5B	ENSG00000110066.GeneBody	GeneBody	Fibroblast	no		1672.95	0.322756	0.200081	1.61313	0.106717	0.284463	not sig
ENSG00000110076	NRXN2	11	64636311	64636436	Fibroblast.47XYY-Fibroblast.46XY	126	5	-25.6416	Promoter (1-2kb)	Hypo	neurexin 2	ENSG00000110076.Promoter	Promoter	Fibroblast	no		341.187	-1.9386	0.355882	-5.44732	5.11343e-08	1.28166e-06	down
ENSG00000110076	NRXN2	11	64660779	64660875	Fibroblast.47XYY-Fibroblast.46XY	97	14	87.8374	Promoter (<=1kb)	Hyper	neurexin 2	ENSG00000110076.Promoter	Promoter	Fibroblast	no		341.187	-1.9386	0.355882	-5.44732	5.11343e-08	1.28166e-06	down
ENSG00000110079	MS4A4A	11	60310200	60310307	Fibroblast.47XYY-Fibroblast.46XY	108	20	89.0998	Intron (ENST00000649552/ENSG00000110079, intron 7 of 7)	Hyper	membrane spanning 4-domains A4A	ENSG00000110079.GeneBody	GeneBody	Fibroblast	no
ENSG00000110080	ST3GAL4	11	126362419	126362496	Fibroblast.47XYY-Fibroblast.46XY	78	7	29.992	Intron (ENST00000534733/ENSG00000110080, intron 2 of 4)	Hyper	ST3 beta-galactoside alpha-2,3-sialyltransferase 4	ENSG00000110080.GeneBody	GeneBody	Fibroblast	no		1157.33	-0.503242	0.144681	-3.4783	0.000504605	0.00438797	not sig
ENSG00000110324	IL10RA	11	117966371	117966462	Fibroblast.47XYY-Fibroblast.46XY	92	4	17.2168	Distal Intergenic	Hyper	interleukin 10 receptor subunit alpha	ENSG00000110324.Intergenic	Intergenic	Fibroblast	no
ENSG00000110497	AMBRA1	11	46590766	46590837	Fibroblast.47XYY-Fibroblast.46XY	72	6	27.5418	Promoter (<=1kb)	Hyper	autophagy and beclin 1 regulator 1	ENSG00000110497.Promoter	Promoter	Fibroblast	no		1122.66	-0.112985	0.112473	-1.00455	0.315112	0.555801	not sig
ENSG00000110841	PPFIBP1	12	27537425	27537569	Fibroblast.47XYY-Fibroblast.46XY	145	4	23.2561	Promoter (<=1kb)	Hyper	PPFIA binding protein 1	ENSG00000110841.Promoter	Promoter	Fibroblast	no		7047.89	0.43564	0.126847	3.43437	0.000593924	0.00505503	not sig
ENSG00000110958	PTGES3	12	56700808	56700861	Fibroblast.47XYY-Fibroblast.46XY	54	9	47.6112	Distal Intergenic	Hyper	prostaglandin E synthase 3	ENSG00000110958.Intergenic	Intergenic	Fibroblast	no		8719.12	-0.0644862	0.171864	-0.375217	0.707499	0.848317	not sig
ENSG00000111046	MYF6	12	80708479	80708737	Fibroblast.47XYY-Fibroblast.46XY	259	36	-213.994	Promoter (<=1kb)	Hypo	myogenic factor 6	ENSG00000111046.Promoter	Promoter	Fibroblast	no
ENSG00000111186	WNT5B	12	1576960	1577102	Fibroblast.47XYY-Fibroblast.46XY	143	9	52.7238	Promoter (2-3kb)	Hyper	Wnt family member 5B	ENSG00000111186.Promoter	Promoter	Fibroblast	no		4685.26	-0.227254	0.128613	-1.76696	0.077235	0.228787	not sig
ENSG00000111218	PRMT8	12	3415879	3415982	Fibroblast.47XYY-Fibroblast.46XY	104	4	25.2876	Intron (ENST00000452611/ENSG00000111218, intron 1 of 9)	Hyper	protein arginine methyltransferase 8	ENSG00000111218.GeneBody	GeneBody	Fibroblast	no
ENSG00000111218	PRMT8	12	3421493	3421557	Fibroblast.47XYY-Fibroblast.46XY	65	6	29.5744	Intron (ENST00000452611/ENSG00000111218, intron 1 of 9)	Hyper	protein arginine methyltransferase 8	ENSG00000111218.GeneBody	GeneBody	Fibroblast	no
ENSG00000111252	SH2B3	12	111409321	111409489	Fibroblast.47XYY-Fibroblast.46XY	169	18	100.246	Intron (ENST00000341259/ENSG00000111252, intron 1 of 7)	Hyper	SH2B adaptor protein 3	ENSG00000111252.GeneBody	GeneBody	Fibroblast	no		4197.08	-0.488528	0.147255	-3.31756	0.000908073	0.00717388	not sig
ENSG00000111252	SH2B3	12	111430879	111431013	Fibroblast.47XYY-Fibroblast.46XY	135	8	40.4744	Intron (ENST00000341259/ENSG00000111252, intron 2 of 7)	Hyper	SH2B adaptor protein 3	ENSG00000111252.GeneBody	GeneBody	Fibroblast	no		4197.08	-0.488528	0.147255	-3.31756	0.000908073	0.00717388	not sig
ENSG00000111271	ACAD10	12	111686639	111686752	Fibroblast.47XYY-Fibroblast.46XY	114	13	43.369	Promoter (<=1kb)	Hyper	acyl-CoA dehydrogenase family member 10	ENSG00000111271.Promoter	Promoter	Fibroblast	no		890.04	-0.170386	0.208963	-0.815388	0.41485	0.6498	not sig
ENSG00000111321	LTBR	12	6384893	6385054	Fibroblast.47XYY-Fibroblast.46XY	162	13	70.6174	Promoter (<=1kb)	Hyper	lymphotoxin beta receptor	ENSG00000111321.Promoter	Promoter	Fibroblast	no		6200.38	-0.413231	0.124385	-3.3222	0.000893114	0.00708112	not sig
ENSG00000111371	SLC38A1	12	46269694	46269911	Fibroblast.47XYY-Fibroblast.46XY	218	19	-96.6289	Promoter (<=1kb)	Hypo	solute carrier family 38 member 1	ENSG00000111371.Promoter	Promoter	Fibroblast	no		6369.24	0.523038	0.271382	1.92731	0.0539411	0.177196	not sig
ENSG00000111676	ATN1	12	6926632	6926818	Fibroblast.47XYY-Fibroblast.46XY	187	16	75.5176	Promoter (1-2kb)	Hyper	atrophin 1	ENSG00000111676.Promoter	Promoter	Fibroblast	no		9293.47	-0.118041	0.127642	-0.924777	0.355082	0.59393	not sig
ENSG00000111817	DSE	6	116278878	116279003	Fibroblast.47XYY-Fibroblast.46XY	126	6	43.7759	Promoter (<=1kb)	Hyper	dermatan sulfate epimerase	ENSG00000111817.Promoter	Promoter	Fibroblast	no		5766.92	-0.257888	0.205561	-1.25456	0.209639	0.435826	not sig
ENSG00000111961	SASH1	6	148519977	148520095	Fibroblast.47XYY-Fibroblast.46XY	119	11	81.3939	Exon (ENST00000636279/ENSG00000111961, exon 2 of 4)	Hyper	SAM and SH3 domain containing 1	ENSG00000111961.GeneBody	GeneBody	Fibroblast	no		8024.14	0.141997	0.0827591	1.71579	0.0862009	0.245606	not sig
ENSG00000111961	SASH1	6	148512086	148512228	Fibroblast.47XYY-Fibroblast.46XY	143	14	89.6024	Promoter (1-2kb)	Hyper	SAM and SH3 domain containing 1	ENSG00000111961.Promoter	Promoter	Fibroblast	no		8024.14	0.141997	0.0827591	1.71579	0.0862009	0.245606	not sig
ENSG00000112118	MCM3	6	52308493	52308620	Fibroblast.47XYY-Fibroblast.46XY	128	8	41.9228	Distal Intergenic	Hyper	minichromosome maintenance complex component 3	ENSG00000112118.Intergenic	Intergenic	Fibroblast	no		2535.44	-0.509795	0.230973	-2.20716	0.0273025	0.107046	not sig
ENSG00000112118	MCM3	6	52304414	52304468	Fibroblast.47XYY-Fibroblast.46XY	55	8	45.6692	Distal Intergenic	Hyper	minichromosome maintenance complex component 3	ENSG00000112118.Intergenic	Intergenic	Fibroblast	no		2535.44	-0.509795	0.230973	-2.20716	0.0273025	0.107046	not sig
ENSG00000112130	RNF8	6	37341128	37341241	Fibroblast.47XYY-Fibroblast.46XY	114	8	34.9554	Distal Intergenic	Hyper	ring finger protein 8	ENSG00000112130.Intergenic	Intergenic	Fibroblast	no		813.192	-0.170231	0.18212	-0.93472	0.349933	0.589424	not sig
ENSG00000112200	ZNF451	6	57086127	57086268	Fibroblast.47XYY-Fibroblast.46XY	142	8	45.8945	Promoter (<=1kb)	Hyper	zinc finger protein 451	ENSG00000112200.Promoter	Promoter	Fibroblast	no		1480.76	-0.0685251	0.13769	-0.497675	0.618713	0.795617	not sig
ENSG00000112246	SIM1	6	100464036	100464088	Fibroblast.47XYY-Fibroblast.46XY	53	9	36.3859	Promoter (<=1kb)	Hyper	SIM bHLH transcription factor 1	ENSG00000112246.Promoter	Promoter	Fibroblast	no		460.086	-0.57535	0.150938	-3.81182	0.000137947	0.00144615	not sig
ENSG00000112511	PHF1	6	33416020	33416136	Fibroblast.47XYY-Fibroblast.46XY	117	6	45.1363	Promoter (<=1kb)	Hyper	PHD finger protein 1	ENSG00000112511.Promoter	Promoter	Fibroblast	no		2022.79	0.0733065	0.154324	0.475017	0.634775	0.806428	not sig
ENSG00000112541	PDE10A	6	165577995	165578095	Fibroblast.47XYY-Fibroblast.46XY	101	6	26.9445	Intron (ENST00000647989/ENSG00000112541, intron 1 of 22)	Hyper	phosphodiesterase 10A	ENSG00000112541.GeneBody	GeneBody	Fibroblast	no
ENSG00000112541	PDE10A	6	165485684	165485740	Fibroblast.47XYY-Fibroblast.46XY	57	4	18.3584	Intron (ENST00000647989/ENSG00000112541, intron 3 of 22)	Hyper	phosphodiesterase 10A	ENSG00000112541.GeneBody	GeneBody	Fibroblast	no
ENSG00000112699	GMDS	6	1624083	1624163	Fibroblast.47XYY-Fibroblast.46XY	81	11	-53.3124	Promoter (<=1kb)	Hypo	GDP-mannose 4,6-dehydratase	ENSG00000112699.Promoter	Promoter	Fibroblast	no		458.641	-0.00868943	0.180033	-0.0482659	0.961504	0.983216	not sig
ENSG00000112941	TENT4A	5	6745141	6745256	Fibroblast.47XYY-Fibroblast.46XY	116	4	23.8384	Promoter (<=1kb)	Hyper	terminal nucleotidyltransferase 4A	ENSG00000112941.Promoter	Promoter	Fibroblast	no		1986.65	-0.0163391	0.156407	-0.104466	0.9168	0.959893	not sig
ENSG00000113240	CLK4	5	178645666	178645801	Fibroblast.47XYY-Fibroblast.46XY	136	8	44.7099	Distal Intergenic	Hyper	CDC like kinase 4	ENSG00000113240.Intergenic	Intergenic	Fibroblast	no		811.911	0.120847	0.169323	0.713705	0.475409	0.695964	not sig
ENSG00000113282	CLINT1	5	157864761	157864899	Fibroblast.47XYY-Fibroblast.46XY	139	14	76.0347	Distal Intergenic	Hyper	clathrin interactor 1	ENSG00000113282.Intergenic	Intergenic	Fibroblast	no		4753.9	-0.117393	0.0687437	-1.70769	0.0876931	0.24857	not sig
ENSG00000113327	GABRG2	5	162149151	162149272	Fibroblast.47XYY-Fibroblast.46XY	122	6	29.1744	3' UTR	Hyper	gamma-aminobutyric acid type A receptor subunit gamma2	ENSG00000113327.GeneBody	GeneBody	Fibroblast	no
ENSG00000113368	LMNB1	5	126819650	126819783	Fibroblast.47XYY-Fibroblast.46XY	134	7	31.5389	Intron (ENST00000460265/ENSG00000113368, intron 7 of 11)	Hyper	lamin B1	ENSG00000113368.GeneBody	GeneBody	Fibroblast	no		2020.74	-0.0890928	0.263172	-0.338535	0.73496	0.864805	not sig
ENSG00000113448	PDE4D	5	60193391	60193496	Fibroblast.47XYY-Fibroblast.46XY	106	8	37.0902	Intron (ENST00000502484/ENSG00000113448, intron 1 of 16)	Hyper	phosphodiesterase 4D	ENSG00000113448.GeneBody	GeneBody	Fibroblast	no		253.144	1.35479	0.212121	6.38689	1.69292e-10	6.98805e-09	up
ENSG00000113448	PDE4D	5	59736399	59736535	Fibroblast.47XYY-Fibroblast.46XY	137	7	32.6645	Intron (ENST00000340635/ENSG00000113448, intron 1 of 14)	Hyper	phosphodiesterase 4D	ENSG00000113448.GeneBody	GeneBody	Fibroblast	no		253.144	1.35479	0.212121	6.38689	1.69292e-10	6.98805e-09	up
ENSG00000113448	PDE4D	5	60524179	60524271	Fibroblast.47XYY-Fibroblast.46XY	93	14	63.3759	Promoter (2-3kb)	Hyper	phosphodiesterase 4D	ENSG00000113448.Promoter	Promoter	Fibroblast	no		253.144	1.35479	0.212121	6.38689	1.69292e-10	6.98805e-09	up
ENSG00000113504	SLC12A7	5	1132704	1132826	Fibroblast.47XYY-Fibroblast.46XY	123	8	53.4163	Distal Intergenic	Hyper	solute carrier family 12 member 7	ENSG00000113504.Intergenic	Intergenic	Fibroblast	no		172.618	0.297532	0.260017	1.14428	0.252508	0.487201	not sig
ENSG00000113504	SLC12A7	5	1140608	1140826	Fibroblast.47XYY-Fibroblast.46XY	219	21	97.1468	Distal Intergenic	Hyper	solute carrier family 12 member 7	ENSG00000113504.Intergenic	Intergenic	Fibroblast	no		172.618	0.297532	0.260017	1.14428	0.252508	0.487201	not sig
ENSG00000113719	ERGIC1	5	172930474	172930638	Fibroblast.47XYY-Fibroblast.46XY	165	6	33.0623	Promoter (<=1kb)	Hyper	endoplasmic reticulum-golgi intermediate compartment 1	ENSG00000113719.Promoter	Promoter	Fibroblast	no		11705.4	-0.32342	0.145239	-2.22682	0.0259595	0.103128	not sig
ENSG00000113763	UNC5A	5	176834310	176835424	Fibroblast.47XYY-Fibroblast.46XY	1115	7	33.207	Intron (ENST00000509580/ENSG00000113763, intron 1 of 15)	Hyper	unc-5 netrin receptor A	ENSG00000113763.GeneBody	GeneBody	Fibroblast	no
ENSG00000113790	EHHADH	3	185210919	185211035	Fibroblast.47XYY-Fibroblast.46XY	117	4	-21.7944	Intron (ENST00000231887/ENSG00000113790, intron 5 of 6)	Hypo	enoyl-CoA hydratase and 3-hydroxyacyl CoA dehydrogenase	ENSG00000113790.GeneBody	GeneBody	Fibroblast	no		448.192	-0.55196	0.0927311	-5.95226	2.64458e-09	8.79904e-08	not sig
ENSG00000114026	OGG1	3	9757462	9757524	Fibroblast.47XYY-Fibroblast.46XY	63	4	18.3862	Promoter (<=1kb)	Hyper	8-oxoguanine DNA glycosylase	ENSG00000114026.Promoter	Promoter	Fibroblast	no		833.281	-0.136895	0.150536	-0.909382	0.363148	0.602844	not sig
ENSG00000114268	PFKFB4	3	48556091	48556297	Fibroblast.47XYY-Fibroblast.46XY	207	4	-9.52307	Promoter (<=1kb)	Hypo	6-phosphofructo-2-kinase/fructose-2,6-biphosphatase 4	ENSG00000114268.Promoter	Promoter	Fibroblast	no		818.562	1.40476	0.241697	5.81208	6.16999e-09	1.86072e-07	up
ENSG00000114841	DNAH1	3	52392599	52392720	Fibroblast.47XYY-Fibroblast.46XY	122	5	21.9997	Promoter (1-2kb)	Hyper	dynein axonemal heavy chain 1	ENSG00000114841.Promoter	Promoter	Fibroblast	no		639.496	-0.468227	0.21899	-2.13812	0.0325073	0.121847	not sig
ENSG00000114867	EIF4G1	3	184321375	184321547	Fibroblast.47XYY-Fibroblast.46XY	173	13	61.9639	Promoter (<=1kb)	Hyper	eukaryotic translation initiation factor 4 gamma 1	ENSG00000114867.Promoter	Promoter	Fibroblast	no		30222.8	-0.137212	0.118339	-1.15948	0.246262	0.47997	not sig
ENSG00000115041	KCNIP3	2	95320482	95320548	Fibroblast.47XYY-Fibroblast.46XY	67	5	21.1087	Intron (ENST00000295225/ENSG00000115041, intron 2 of 8)	Hyper	potassium voltage-gated channel interacting protein 3	ENSG00000115041.GeneBody	GeneBody	Fibroblast	no		483.586	1.18541	0.307118	3.85979	0.000113484	0.0012207	up
ENSG00000115107	STEAP3	2	119223344	119223520	Fibroblast.47XYY-Fibroblast.46XY	177	16	-81.4207	Promoter (<=1kb)	Hypo	STEAP3 metalloreductase	ENSG00000115107.Promoter	Promoter	Fibroblast	no		3403.17	-0.285293	0.0970564	-2.93946	0.00328785	0.0206021	not sig
ENSG00000115112	TFCP2L1	2	121273919	121274007	Fibroblast.47XYY-Fibroblast.46XY	89	8	32.5725	Intron (ENST00000263707/ENSG00000115112, intron 2 of 14)	Hyper	transcription factor CP2 like 1	ENSG00000115112.GeneBody	GeneBody	Fibroblast	no
ENSG00000115128	SF3B6	2	24074849	24074946	Fibroblast.47XYY-Fibroblast.46XY	98	7	33.4984	Promoter (1-2kb)	Hyper	splicing factor 3b subunit 6	ENSG00000115128.Promoter	Promoter	Fibroblast	no		2091.39	0.0794597	0.164672	0.482533	0.629428	0.804072	not sig
ENSG00000115129	TP53I3	2	24101883	24101977	Fibroblast.47XYY-Fibroblast.46XY	95	7	33.5954	Intron (ENST00000613899/ENSG00000219626, intron 3 of 10)	Hyper	tumor protein p53 inducible protein 3	ENSG00000115129.GeneBody	GeneBody	Fibroblast	no		1849.17	-0.269581	0.1053	-2.56013	0.0104633	0.0518807	not sig
ENSG00000115165	CYTIP	2	157430440	157430558	Fibroblast.47XYY-Fibroblast.46XY	119	7	-32.4838	Intron (ENST00000264192/ENSG00000115165, intron 5 of 7)	Hypo	cytohesin 1 interacting protein	ENSG00000115165.GeneBody	GeneBody	Fibroblast	no
ENSG00000115183	TANC1	2	158955305	158955381	Fibroblast.47XYY-Fibroblast.46XY	77	6	32.4214	Distal Intergenic	Hyper	tetratricopeptide repeat, ankyrin repeat and coiled-coil containing 1	ENSG00000115183.Intergenic	Intergenic	Fibroblast	no		2785.93	-0.329602	0.123957	-2.65901	0.00783712	0.0412268	not sig
ENSG00000115255	REEP6	19	1497731	1497854	Fibroblast.47XYY-Fibroblast.46XY	124	13	63.4184	Promoter (2-3kb)	Hyper	receptor accessory protein 6	ENSG00000115255.Promoter	Promoter	Fibroblast	no		56.6608	-0.703563	0.236776	-2.97143	0.00296421	0.0189977	down
ENSG00000115257	PCSK4	19	1483103	1483153	Fibroblast.47XYY-Fibroblast.46XY	51	11	49.0646	Promoter (<=1kb)	Hyper	proprotein convertase subtilisin/kexin type 4	ENSG00000115257.Promoter	Promoter	Fibroblast	no		60.4984	0.402097	0.258703	1.55428	0.120117	0.306122	not sig
ENSG00000115306	SPTBN1	2	54558657	54558758	Fibroblast.47XYY-Fibroblast.46XY	102	17	-115.659	Promoter (<=1kb)	Hypo	spectrin beta, non-erythrocytic 1	ENSG00000115306.Promoter	Promoter	Fibroblast	no		20171	-0.493889	0.156306	-3.15975	0.00157902	0.0113478	not sig
ENSG00000115353	TACR1	2	75217240	75217296	Fibroblast.47XYY-Fibroblast.46XY	57	4	19.4162	Distal Intergenic	Hyper	tachykinin receptor 1	ENSG00000115353.Intergenic	Intergenic	Fibroblast	no		28.1737	1.42007	1.10103	1.28976	0.197132	0.419327	not sig
ENSG00000115355	CCDC88A	2	55385573	55385650	Fibroblast.47XYY-Fibroblast.46XY	78	13	83.362	Intron (ENST00000336838/ENSG00000115355, intron 3 of 32)	Hyper	coiled-coil domain containing 88A	ENSG00000115355.GeneBody	GeneBody	Fibroblast	no		3627.6	-0.224695	0.153213	-1.46655	0.1425	0.341448	not sig
ENSG00000115414	FN1	2	215392865	215393010	Fibroblast.47XYY-Fibroblast.46XY	146	12	64.9079	Promoter (<=1kb)	Hyper	fibronectin 1	ENSG00000115414.Promoter	Promoter	Fibroblast	no		1.75791e+06	0.814819	0.133544	6.1015	1.05076e-09	3.76138e-08	up
ENSG00000115523	GNLY	2	85711512	85711648	Fibroblast.47XYY-Fibroblast.46XY	137	6	28.5335	Distal Intergenic	Hyper	granulysin	ENSG00000115523.Intergenic	Intergenic	Fibroblast	no
ENSG00000115590	IL1R2	2	102006747	102006797	Fibroblast.47XYY-Fibroblast.46XY	51	5	23.2165	Promoter (1-2kb)	Hyper	interleukin 1 receptor type 2	ENSG00000115590.Promoter	Promoter	Fibroblast	no
ENSG00000115705	TPO	2	1435093	1435228	Fibroblast.47XYY-Fibroblast.46XY	136	12	54.9784	Promoter (1-2kb)	Hyper	thyroid peroxidase	ENSG00000115705.Promoter	Promoter	Fibroblast	no
ENSG00000115705	TPO	2	1500687	1500793	Fibroblast.47XYY-Fibroblast.46XY	107	7	35.0847	Promoter (2-3kb)	Hyper	thyroid peroxidase	ENSG00000115705.Promoter	Promoter	Fibroblast	no
ENSG00000115806	GORASP2	2	170974151	170974411	Fibroblast.47XYY-Fibroblast.46XY	261	21	103.664	Distal Intergenic	Hyper	golgi reassembly stacking protein 2	ENSG00000115806.Intergenic	Intergenic	Fibroblast	no		6056.26	0.00938389	0.0636874	0.147343	0.882861	0.943417	not sig
ENSG00000116032	GRIN3B	19	1005604	1005721	Fibroblast.47XYY-Fibroblast.46XY	118	6	39.2011	Promoter (1-2kb)	Hyper	glutamate ionotropic receptor NMDA type subunit 3B	ENSG00000116032.Promoter	Promoter	Fibroblast	no
ENSG00000116128	BCL9	1	147545220	147545356	Fibroblast.47XYY-Fibroblast.46XY	137	8	39.2638	Intron (ENST00000234739/ENSG00000116128, intron 1 of 9)	Hyper	BCL9 transcription coactivator	ENSG00000116128.GeneBody	GeneBody	Fibroblast	no		752.616	0.430824	0.206507	2.08625	0.0369562	0.133778	not sig
ENSG00000116147	TNR	1	175666570	175666643	Fibroblast.47XYY-Fibroblast.46XY	74	10	44.3112	Intron (ENST00000367674/ENSG00000116147, intron 1 of 22)	Hyper	tenascin R	ENSG00000116147.GeneBody	GeneBody	Fibroblast	no
ENSG00000116183	PAPPA2	1	176760945	176761116	Fibroblast.47XYY-Fibroblast.46XY	172	19	89.0483	Intron (ENST00000367662/ENSG00000116183, intron 14 of 22)	Hyper	pappalysin 2	ENSG00000116183.GeneBody	GeneBody	Fibroblast	no		226.655	0.61645	0.420461	1.46613	0.142613	0.341448	not sig
ENSG00000116191	RALGPS2	1	178946444	178946603	Fibroblast.47XYY-Fibroblast.46XY	160	11	64.7031	Distal Intergenic	Hyper	Ral GEF with PH domain and SH3 binding motif 2	ENSG00000116191.Intergenic	Intergenic	Fibroblast	no		2765.7	0.0316574	0.153062	0.206827	0.836145	0.918015	not sig
ENSG00000116191	RALGPS2	1	178941799	178941989	Fibroblast.47XYY-Fibroblast.46XY	191	17	87.2746	Distal Intergenic	Hyper	Ral GEF with PH domain and SH3 binding motif 2	ENSG00000116191.Intergenic	Intergenic	Fibroblast	no		2765.7	0.0316574	0.153062	0.206827	0.836145	0.918015	not sig
ENSG00000116254	CHD5	1	6170928	6171029	Fibroblast.47XYY-Fibroblast.46XY	102	13	56.6895	Intron (ENST00000262450/ENSG00000116254, intron 1 of 41)	Hyper	chromodomain helicase DNA binding protein 5	ENSG00000116254.GeneBody	GeneBody	Fibroblast	no
ENSG00000116254	CHD5	1	6160970	6161061	Fibroblast.47XYY-Fibroblast.46XY	92	8	51.4989	Intron (ENST00000262450/ENSG00000116254, intron 2 of 41)	Hyper	chromodomain helicase DNA binding protein 5	ENSG00000116254.GeneBody	GeneBody	Fibroblast	no
ENSG00000116260	QSOX1	1	180194804	180194977	Fibroblast.47XYY-Fibroblast.46XY	174	13	-60.7361	Promoter (1-2kb)	Hypo	quiescin sulfhydryl oxidase 1	ENSG00000116260.Promoter	Promoter	Fibroblast	no		19267.3	0.227186	0.20153	1.1273	0.259614	0.495542	not sig
ENSG00000116497	S100PBP	1	32815070	32815206	Fibroblast.47XYY-Fibroblast.46XY	137	10	54.1276	Promoter (1-2kb)	Hyper	S100P binding protein	ENSG00000116497.Promoter	Promoter	Fibroblast	no		1545.66	0.134349	0.137669	0.975885	0.329122	0.569027	not sig
ENSG00000116514	RNF19B	1	32963436	32963513	Fibroblast.47XYY-Fibroblast.46XY	78	9	46.8875	Promoter (1-2kb)	Hyper	ring finger protein 19B	ENSG00000116514.Promoter	Promoter	Fibroblast	no		454.642	-0.0547159	0.1517	-0.360685	0.718335	0.855281	not sig
ENSG00000116584	ARHGEF2	1	155989013	155989174	Fibroblast.47XYY-Fibroblast.46XY	162	10	47.0045	Promoter (<=1kb)	Hyper	Rho/Rac guanine nucleotide exchange factor 2	ENSG00000116584.Promoter	Promoter	Fibroblast	no		6782.15	0.472994	0.261747	1.80707	0.0707521	0.214585	not sig
ENSG00000116977	LGALS8	1	236523277	236523349	Fibroblast.47XYY-Fibroblast.46XY	73	11	54.1588	Promoter (<=1kb)	Hyper	galectin 8	ENSG00000116977.Promoter	Promoter	Fibroblast	no		1808.33	0.0630134	0.124773	0.505023	0.613543	0.792201	not sig
ENSG00000117152	RGS4	1	163107013	163107165	Fibroblast.47XYY-Fibroblast.46XY	153	9	42.8599	Distal Intergenic	Hyper	regulator of G protein signaling 4	ENSG00000117152.Intergenic	Intergenic	Fibroblast	no		4790.45	0.335426	0.319214	1.05079	0.293356	0.533078	not sig
ENSG00000117245	KIF17	1	20686647	20686774	Fibroblast.47XYY-Fibroblast.46XY	128	4	19.7727	Promoter (<=1kb)	Hyper	kinesin family member 17	ENSG00000117245.Promoter	Promoter	Fibroblast	no		79.0397	-0.264505	0.280105	-0.944307	0.345013	0.585091	not sig
ENSG00000117245	KIF17	1	20675168	20675222	Fibroblast.47XYY-Fibroblast.46XY	55	6	28.2377	Promoter (2-3kb)	Hyper	kinesin family member 17	ENSG00000117245.Promoter	Promoter	Fibroblast	no		79.0397	-0.264505	0.280105	-0.944307	0.345013	0.585091	not sig
ENSG00000117266	CDK18	1	205484795	205484929	Fibroblast.47XYY-Fibroblast.46XY	135	8	46.9322	Distal Intergenic	Hyper	cyclin dependent kinase 18	ENSG00000117266.Intergenic	Intergenic	Fibroblast	no		94.1471	3.35678	0.425831	7.88288	3.19912e-15	2.64107e-13	up
ENSG00000117298	ECE1	1	21324173	21324297	Fibroblast.47XYY-Fibroblast.46XY	125	6	28.5319	Intron (ENST00000415912/ENSG00000117298, intron 1 of 18)	Hyper	endothelin converting enzyme 1	ENSG00000117298.GeneBody	GeneBody	Fibroblast	no		7596.66	-0.394586	0.165116	-2.38975	0.0168598	0.0745071	not sig
ENSG00000117616	RSRP1	1	25245910	25246047	Fibroblast.47XYY-Fibroblast.46XY	138	16	83.8056	Promoter (<=1kb)	Hyper	arginine and serine rich protein 1	ENSG00000117616.Promoter	Promoter	Fibroblast	no		4068.31	0.0839704	0.234014	0.358826	0.719725	0.855856	not sig
ENSG00000117676	RPS6KA1	1	26571498	26571602	Fibroblast.47XYY-Fibroblast.46XY	105	8	39.4038	Promoter (<=1kb)	Hyper	ribosomal protein S6 kinase A1	ENSG00000117676.Promoter	Promoter	Fibroblast	no		60.3204	-0.100395	0.298345	-0.336508	0.736488	0.865965	not sig
ENSG00000117859	OSBPL9	1	51729931	51730034	Fibroblast.47XYY-Fibroblast.46XY	104	10	-50.8303	Promoter (<=1kb)	Hypo	oxysterol binding protein like 9	ENSG00000117859.Promoter	Promoter	Fibroblast	no		3288.86	0.489549	0.237036	2.06529	0.0388957	0.139248	not sig
ENSG00000117983	MUC5B	11	1227900	1228054	Fibroblast.47XYY-Fibroblast.46XY	155	18	91.4786	Promoter (<=1kb)	Hyper	mucin 5B, oligomeric mucus/gel-forming	ENSG00000117983.Promoter	Promoter	Fibroblast	no
ENSG00000118046	STK11	19	1176796	1176931	Fibroblast.47XYY-Fibroblast.46XY	136	23	246.8	Promoter (<=1kb)	Hyper	serine/threonine kinase 11	ENSG00000118046.Promoter	Promoter	Fibroblast	no		2070.82	0.140296	0.11298	1.24177	0.21432	0.441953	not sig
ENSG00000118271	TTR	18	31598490	31598591	Fibroblast.47XYY-Fibroblast.46XY	102	8	45.1731	Exon (ENST00000610404/ENSG00000118271, exon 4 of 4)	Hyper	transthyretin	ENSG00000118271.GeneBody	GeneBody	Fibroblast	no
ENSG00000118432	CNR1	6	88146314	88146401	Fibroblast.47XYY-Fibroblast.46XY	88	4	18.0759	Promoter (<=1kb)	Hyper	cannabinoid receptor 1	ENSG00000118432.Promoter	Promoter	Fibroblast	no
ENSG00000118473	SGIP1	1	66615008	66615116	Fibroblast.47XYY-Fibroblast.46XY	109	7	32.2553	Promoter (<=1kb)	Hyper	SH3GL interacting endocytic adaptor 1	ENSG00000118473.Promoter	Promoter	Fibroblast	no		1275.22	0.4586	0.217726	2.10631	0.035177	0.128677	not sig
ENSG00000118515	SGK1	6	134176302	134176358	Fibroblast.47XYY-Fibroblast.46XY	57	4	-20.055	Promoter (<=1kb)	Hypo	serum/glucocorticoid regulated kinase 1	ENSG00000118515.Promoter	Promoter	Fibroblast	no		3328.64	-0.176043	0.220563	-0.798152	0.424783	0.657841	not sig
ENSG00000118526	TCF21	6	133889115	133889169	Fibroblast.47XYY-Fibroblast.46XY	55	8	-30.9245	Promoter (<=1kb)	Hypo	transcription factor 21	ENSG00000118526.Promoter	Promoter	Fibroblast	no		93.352	7.1708	0.804418	8.91427	4.91043e-19	7.63081e-17	up
ENSG00000118707	TGIF2	20	36575126	36575327	Fibroblast.47XYY-Fibroblast.46XY	202	22	-99.4892	Promoter (<=1kb)	Hypo	TGFB induced factor homeobox 2	ENSG00000118707.Promoter	Promoter	Fibroblast	no		487.067	0.479044	0.258858	1.85061	0.064226	0.20018	not sig
ENSG00000118733	OLFM3	1	102157927	102157997	Fibroblast.47XYY-Fibroblast.46XY	71	9	39.1149	Distal Intergenic	Hyper	olfactomedin 3	ENSG00000118733.Intergenic	Intergenic	Fibroblast	no
ENSG00000118898	PPL	16	4892354	4892565	Fibroblast.47XYY-Fibroblast.46XY	212	23	-117.624	Promoter (<=1kb)	Hypo	periplakin	ENSG00000118898.Promoter	Promoter	Fibroblast	no		301.068	0.643955	0.654795	0.983445	0.325388	0.56495	not sig
ENSG00000118898	PPL	16	4934303	4935755	Fibroblast.47XYY-Fibroblast.46XY	1453	18	83.2886	Promoter (1-2kb)	Hyper	periplakin	ENSG00000118898.Promoter	Promoter	Fibroblast	no		301.068	0.643955	0.654795	0.983445	0.325388	0.56495	not sig
ENSG00000118900	UBN1	16	4848821	4848957	Fibroblast.47XYY-Fibroblast.46XY	137	11	83.1678	Promoter (<=1kb)	Hyper	ubinuclein 1	ENSG00000118900.Promoter	Promoter	Fibroblast	no		2862.66	-0.173328	0.101849	-1.70181	0.0887916	0.250716	not sig
ENSG00000118946	PCDH17	13	57772709	57772798	Fibroblast.47XYY-Fibroblast.46XY	90	13	55.5588	Distal Intergenic	Hyper	protocadherin 17	ENSG00000118946.Intergenic	Intergenic	Fibroblast	no
ENSG00000119042	SATB2	2	199455875	199455940	Fibroblast.47XYY-Fibroblast.46XY	66	14	-75.7415	Promoter (<=1kb)	Hypo	SATB homeobox 2	ENSG00000119042.Promoter	Promoter	Fibroblast	no		961.103	-0.0863255	0.105752	-0.816302	0.414327	0.649336	not sig
ENSG00000119042	SATB2	2	199456247	199456545	Fibroblast.47XYY-Fibroblast.46XY	299	40	-295.509	Promoter (<=1kb)	Hypo	SATB homeobox 2	ENSG00000119042.Promoter	Promoter	Fibroblast	no		961.103	-0.0863255	0.105752	-0.816302	0.414327	0.649336	not sig
ENSG00000119042	SATB2	2	199455995	199456068	Fibroblast.47XYY-Fibroblast.46XY	74	17	-78.8087	Promoter (<=1kb)	Hypo	SATB homeobox 2	ENSG00000119042.Promoter	Promoter	Fibroblast	no		961.103	-0.0863255	0.105752	-0.816302	0.414327	0.649336	not sig
ENSG00000119147	ECRG4	2	106073498	106073570	Fibroblast.47XYY-Fibroblast.46XY	73	4	17.4731	Promoter (<=1kb)	Hyper	ECRG4 augurin precursor	ENSG00000119147.Promoter	Promoter	Fibroblast	no
ENSG00000119283	TRIM67	1	231160987	231161039	Fibroblast.47XYY-Fibroblast.46XY	53	6	-30.8086	Promoter (1-2kb)	Hypo	tripartite motif containing 67	ENSG00000119283.Promoter	Promoter	Fibroblast	no
ENSG00000119333	DYNC2I2	9	128655484	128655585	Fibroblast.47XYY-Fibroblast.46XY	102	7	33.1791	Promoter (1-2kb)	Hyper	dynein 2 intermediate chain 2	ENSG00000119333.Promoter	Promoter	Fibroblast	no		1327.07	-0.094827	0.134153	-0.706859	0.479654	0.698925	not sig
ENSG00000119403	PHF19	9	120897699	120897835	Fibroblast.47XYY-Fibroblast.46XY	137	10	52.4494	Promoter (2-3kb)	Hyper	PHD finger protein 19	ENSG00000119403.Promoter	Promoter	Fibroblast	no		1792.69	0.0286243	0.21393	0.133802	0.893559	0.948957	not sig
ENSG00000119440	LCN1P1	9	133226788	133226910	Fibroblast.47XYY-Fibroblast.46XY	123	6	27.6374	Promoter (1-2kb)	Hyper	lipocalin 1 pseudogene 1	ENSG00000119440.Promoter	Promoter	Fibroblast	no
ENSG00000119508	NR4A3	9	99829081	99829204	Fibroblast.47XYY-Fibroblast.46XY	124	6	-32.0647	Promoter (2-3kb)	Hypo	nuclear receptor subfamily 4 group A member 3	ENSG00000119508.Promoter	Promoter	Fibroblast	no		210.063	0.484424	0.298856	1.62093	0.105033	0.28172	not sig
ENSG00000119522	DENND1A	9	123678457	123678581	Fibroblast.47XYY-Fibroblast.46XY	125	9	-47.965	Promoter (1-2kb)	Hypo	DENN domain containing 1A	ENSG00000119522.Promoter	Promoter	Fibroblast	no		923.18	0.0246432	0.0893177	0.275905	0.782621	0.89246	not sig
ENSG00000119523	ALG2	9	99204644	99204740	Fibroblast.47XYY-Fibroblast.46XY	97	4	18.1285	Distal Intergenic	Hyper	ALG2 alpha-1,3/1,6-mannosyltransferase	ENSG00000119523.Intergenic	Intergenic	Fibroblast	no		1535.57	-0.0487798	0.12731	-0.383159	0.701602	0.845417	not sig
ENSG00000119638	NEK9	14	75127672	75127796	Fibroblast.47XYY-Fibroblast.46XY	125	13	68.1336	Promoter (<=1kb)	Hyper	NIMA related kinase 9	ENSG00000119638.Promoter	Promoter	Fibroblast	no		4947.59	-0.170631	0.11214	-1.52159	0.128112	0.318508	not sig
ENSG00000119650	IFT43	14	76084537	76084646	Fibroblast.47XYY-Fibroblast.46XY	110	4	-18.012	Exon (ENST00000555305/ENSG00000119650, exon 9 of 9)	Hypo	intraflagellar transport 43	ENSG00000119650.GeneBody	GeneBody	Fibroblast	no		719.461	-0.206358	0.224259	-0.920177	0.35748	0.596508	not sig
ENSG00000119681	LTBP2	14	74508324	74508408	Fibroblast.47XYY-Fibroblast.46XY	85	7	-32.5177	Promoter (1-2kb)	Hypo	latent transforming growth factor beta binding protein 2	ENSG00000119681.Promoter	Promoter	Fibroblast	no		63293.5	0.250174	0.157247	1.59097	0.111617	0.292645	not sig
ENSG00000119686	FLVCR2	14	75605676	75605801	Fibroblast.47XYY-Fibroblast.46XY	126	4	27.1171	Promoter (<=1kb)	Hyper	FLVCR heme transporter 2	ENSG00000119686.Promoter	Promoter	Fibroblast	no
ENSG00000119714	GPR68	14	91253950	91254092	Fibroblast.47XYY-Fibroblast.46XY	143	10	-47.5439	Promoter (<=1kb)	Hypo	G protein-coupled receptor 68	ENSG00000119714.Promoter	Promoter	Fibroblast	no		435.982	0.147332	0.354566	0.415527	0.677756	0.831082	not sig
ENSG00000119715	ESRRB	14	76457123	76457235	Fibroblast.47XYY-Fibroblast.46XY	113	4	-23.5118	Intron (ENST00000512784/ENSG00000119715, intron 2 of 6)	Hypo	estrogen related receptor beta	ENSG00000119715.GeneBody	GeneBody	Fibroblast	no
ENSG00000119772	DNMT3A	2	25277256	25277318	Fibroblast.47XYY-Fibroblast.46XY	63	6	-26.615	Intron (ENST00000264709/ENSG00000119772, intron 4 of 22)	Hypo	DNA methyltransferase 3 alpha	ENSG00000119772.GeneBody	GeneBody	Fibroblast	no		699.705	0.44424	0.244117	1.81978	0.0687922	0.210683	not sig
ENSG00000119772	DNMT3A	2	25264682	25264757	Fibroblast.47XYY-Fibroblast.46XY	76	9	45.4788	Intron (ENST00000264709/ENSG00000119772, intron 6 of 22)	Hyper	DNA methyltransferase 3 alpha	ENSG00000119772.GeneBody	GeneBody	Fibroblast	no		699.705	0.44424	0.244117	1.81978	0.0687922	0.210683	not sig
ENSG00000119922	IFIT2	10	89282358	89282496	Fibroblast.47XYY-Fibroblast.46XY	139	6	30.0285	Promoter (1-2kb)	Hyper	interferon induced protein with tetratricopeptide repeats 2	ENSG00000119922.Promoter	Promoter	Fibroblast	no		326.925	0.830987	0.313846	2.64775	0.00810296	0.0423051	up
ENSG00000120088	CRHR1	17	45785594	45785710	Fibroblast.47XYY-Fibroblast.46XY	117	12	-59.9501	Promoter (1-2kb)	Hypo	corticotropin releasing hormone receptor 1	ENSG00000120088.Promoter	Promoter	Fibroblast	no
ENSG00000120149	MSX2	5	174684116	174684172	Fibroblast.47XYY-Fibroblast.46XY	57	8	35.6586	Distal Intergenic	Hyper	msh homeobox 2	ENSG00000120149.Intergenic	Intergenic	Fibroblast	no		83.8685	0.0731398	0.456625	0.160175	0.872743	0.937546	not sig
ENSG00000120149	MSX2	5	174715360	174715468	Fibroblast.47XYY-Fibroblast.46XY	109	4	22.8617	Distal Intergenic	Hyper	msh homeobox 2	ENSG00000120149.Intergenic	Intergenic	Fibroblast	no		83.8685	0.0731398	0.456625	0.160175	0.872743	0.937546	not sig
ENSG00000120149	MSX2	5	174683404	174683572	Fibroblast.47XYY-Fibroblast.46XY	169	11	65.8556	Distal Intergenic	Hyper	msh homeobox 2	ENSG00000120149.Intergenic	Intergenic	Fibroblast	no		83.8685	0.0731398	0.456625	0.160175	0.872743	0.937546	not sig
ENSG00000120265	PCMT1	6	149751037	149752862	Fibroblast.47XYY-Fibroblast.46XY	1826	15	66.3425	Promoter (<=1kb)	Hyper	protein-L-isoaspartate (D-aspartate) O-methyltransferase	ENSG00000120265.Promoter	Promoter	Fibroblast	no		2667.85	-0.266415	0.151322	-1.76058	0.0783088	0.230631	not sig
ENSG00000120278	PLEKHG1	6	150754828	150754897	Fibroblast.47XYY-Fibroblast.46XY	70	6	28.8659	Intron (ENST00000644968/ENSG00000120278, intron 2 of 15)	Hyper	pleckstrin homology and RhoGEF domain containing G1	ENSG00000120278.GeneBody	GeneBody	Fibroblast	no
ENSG00000120318	ARAP3	5	141682630	141682795	Fibroblast.47XYY-Fibroblast.46XY	166	13	56.0351	Promoter (<=1kb)	Hyper	ArfGAP with RhoGAP domain, ankyrin repeat and PH domain 3	ENSG00000120318.Promoter	Promoter	Fibroblast	no		686.747	0.784016	0.136559	5.74122	9.39942e-09	2.71085e-07	up
ENSG00000120457	KCNJ5	11	128911486	128911616	Fibroblast.47XYY-Fibroblast.46XY	131	8	41.8554	Promoter (<=1kb)	Hyper	potassium inwardly rectifying channel subfamily J member 5	ENSG00000120457.Promoter	Promoter	Fibroblast	no
ENSG00000120694	HSPH1	13	31110784	31110909	Fibroblast.47XYY-Fibroblast.46XY	126	10	53.6321	Intron (ENST00000425638/ENSG00000231894, intron 11 of 15)	Hyper	heat shock protein family H (Hsp110) member 1	ENSG00000120694.GeneBody	GeneBody	Fibroblast	no		3837.46	-0.271023	0.158096	-1.7143	0.0864745	0.24612	not sig
ENSG00000120705	ETF1	5	138502393	138502488	Fibroblast.47XYY-Fibroblast.46XY	96	5	23.6779	Distal Intergenic	Hyper	eukaryotic translation termination factor 1	ENSG00000120705.Intergenic	Intergenic	Fibroblast	no		6267.1	-0.223431	0.144922	-1.54173	0.123139	0.31029	not sig
ENSG00000120705	ETF1	5	138519384	138519490	Fibroblast.47XYY-Fibroblast.46XY	107	15	75.3322	Promoter (1-2kb)	Hyper	eukaryotic translation termination factor 1	ENSG00000120705.Promoter	Promoter	Fibroblast	no		6267.1	-0.223431	0.144922	-1.54173	0.123139	0.31029	not sig
ENSG00000120875	DUSP4	8	29347995	29348377	Fibroblast.47XYY-Fibroblast.46XY	383	57	-346.033	Promoter (<=1kb)	Hypo	dual specificity phosphatase 4	ENSG00000120875.Promoter	Promoter	Fibroblast	no		559.643	-1.27781	0.247084	-5.17157	2.32135e-07	4.94559e-06	down
ENSG00000120899	PTK2B	8	27332020	27332070	Fibroblast.47XYY-Fibroblast.46XY	51	4	19.1517	Intron (ENST00000397501/ENSG00000120899, intron 6 of 35)	Hyper	protein tyrosine kinase 2 beta	ENSG00000120899.GeneBody	GeneBody	Fibroblast	no		358.849	-0.990061	0.256126	-3.86553	0.00011085	0.00119919	down
ENSG00000120913	PDLIM2	8	22585252	22585447	Fibroblast.47XYY-Fibroblast.46XY	196	14	65.4947	Promoter (<=1kb)	Hyper	PDZ and LIM domain 2	ENSG00000120913.Promoter	Promoter	Fibroblast	no		1806.68	-0.229411	0.16546	-1.3865	0.165593	0.376475	not sig
ENSG00000121068	TBX2	17	61400753	61401033	Fibroblast.47XYY-Fibroblast.46XY	281	45	-251.231	Promoter (<=1kb)	Hypo	T-box transcription factor 2	ENSG00000121068.Promoter	Promoter	Fibroblast	no		680.199	0.455011	0.529822	0.858801	0.39045	0.627352	not sig
ENSG00000121104	FAM117A	17	49754464	49754599	Fibroblast.47XYY-Fibroblast.46XY	136	12	64.8644	Intron (ENST00000240364/ENSG00000121104, intron 1 of 7)	Hyper	family with sequence similarity 117 member A	ENSG00000121104.GeneBody	GeneBody	Fibroblast	no		130.478	0.133757	0.243401	0.549531	0.582641	0.771766	not sig
ENSG00000121152	NCAPH	2	96410001	96410116	Fibroblast.47XYY-Fibroblast.46XY	116	10	51.3842	Distal Intergenic	Hyper	non-SMC condensin I complex subunit H	ENSG00000121152.Intergenic	Intergenic	Fibroblast	no		799.102	-0.253415	0.297561	-0.851641	0.394413	0.631339	not sig
ENSG00000121210	TMEM131L	4	153574732	153574830	Fibroblast.47XYY-Fibroblast.46XY	99	5	-23.2407	Intron (ENST00000409663/ENSG00000121210, intron 7 of 34)	Hypo	transmembrane 131 like	ENSG00000121210.GeneBody	GeneBody	Fibroblast	no		648.811	-0.562046	0.120252	-4.67392	2.95508e-06	4.89144e-05	not sig
ENSG00000121270	ABCC11	16	48197045	48197181	Fibroblast.47XYY-Fibroblast.46XY	137	6	32.0213	Promoter (1-2kb)	Hyper	ATP binding cassette subfamily C member 11	ENSG00000121270.Promoter	Promoter	Fibroblast	no
ENSG00000121281	ADCY7	16	50281961	50282147	Fibroblast.47XYY-Fibroblast.46XY	187	14	67.7348	Promoter (2-3kb)	Hyper	adenylate cyclase 7	ENSG00000121281.Promoter	Promoter	Fibroblast	no		2813.38	-0.939409	0.142864	-6.57557	4.84677e-11	2.2307e-09	down
ENSG00000121281	ADCY7	16	50284042	50284231	Fibroblast.47XYY-Fibroblast.46XY	190	7	36.7985	Intron (ENST00000564965/ENSG00000121281, intron 1 of 2)	Hyper	adenylate cyclase 7	ENSG00000121281.GeneBody	GeneBody	Fibroblast	no		2813.38	-0.939409	0.142864	-6.57557	4.84677e-11	2.2307e-09	down
ENSG00000121297	TSHZ3	19	31314381	31314492	Fibroblast.47XYY-Fibroblast.46XY	112	7	33.2146	Intron (ENST00000651361/ENSG00000121297, intron 1 of 6)	Hyper	teashirt zinc finger homeobox 3	ENSG00000121297.GeneBody	GeneBody	Fibroblast	no		1763.29	-0.0841798	0.0842319	-0.99938	0.31761	0.558536	not sig
ENSG00000121316	PLBD1	12	14574098	14574232	Fibroblast.47XYY-Fibroblast.46XY	135	4	31.3267	Intron (ENST00000542401/ENSG00000256751, intron 1 of 4)	Hyper	phospholipase B domain containing 1	ENSG00000121316.GeneBody	GeneBody	Fibroblast	no
ENSG00000121380	BCL2L14	12	12010255	12010313	Fibroblast.47XYY-Fibroblast.46XY	59	4	19.8996	Distal Intergenic	Hyper	BCL2 like 14	ENSG00000121380.Intergenic	Intergenic	Fibroblast	no
ENSG00000121388		13	19182767	19182871	Fibroblast.47XYY-Fibroblast.46XY	105	9	38.2151	Promoter (<=1kb)	Hyper		ENSG00000121388.Promoter	Promoter	Fibroblast	no
ENSG00000121440	PDZRN3	3	73550037	73550207	Fibroblast.47XYY-Fibroblast.46XY	171	4	20.2897	Intron (ENST00000263666/ENSG00000121440, intron 3 of 9)	Hyper	PDZ domain containing ring finger 3	ENSG00000121440.GeneBody	GeneBody	Fibroblast	no		2543.99	0.297019	0.180982	1.64115	0.100767	0.273863	not sig
ENSG00000121634	GJA8	1	147908453	147908553	Fibroblast.47XYY-Fibroblast.46XY	101	6	31.9437	Exon (ENST00000369235/ENSG00000121634, exon 2 of 2)	Hyper	gap junction protein alpha 8	ENSG00000121634.GeneBody	GeneBody	Fibroblast	no
ENSG00000121653	MAPK8IP1	11	45886312	45886523	Fibroblast.47XYY-Fibroblast.46XY	212	19	-98.4519	Promoter (<=1kb)	Hypo	mitogen-activated protein kinase 8 interacting protein 1	ENSG00000121653.Promoter	Promoter	Fibroblast	no		236.968	0.344366	0.203532	1.69195	0.0906555	0.254498	not sig
ENSG00000121741	ZMYM2	13	19936442	19936578	Fibroblast.47XYY-Fibroblast.46XY	137	4	18.252	Distal Intergenic	Hyper	zinc finger MYM-type containing 2	ENSG00000121741.Intergenic	Intergenic	Fibroblast	no		2621.88	0.0815267	0.192663	0.423157	0.672181	0.828082	not sig
ENSG00000121742	GJB6	13	20261969	20262065	Fibroblast.47XYY-Fibroblast.46XY	97	12	54.0495	Distal Intergenic	Hyper	gap junction protein beta 6	ENSG00000121742.Intergenic	Intergenic	Fibroblast	no
ENSG00000122035	RASL11A	13	27291990	27292095	Fibroblast.47XYY-Fibroblast.46XY	106	5	22.4043	Distal Intergenic	Hyper	RAS like family 11 member A	ENSG00000122035.Intergenic	Intergenic	Fibroblast	no		52.0075	-0.231422	0.415252	-0.557306	0.577318	0.76837	not sig
ENSG00000122043		13	29938478	29938528	Fibroblast.47XYY-Fibroblast.46XY	51	4	19.3565	Promoter (2-3kb)	Hyper		ENSG00000122043.Promoter	Promoter	Fibroblast	no
ENSG00000122304	PRM2	16	11277378	11277493	Fibroblast.47XYY-Fibroblast.46XY	116	5	29.4341	Promoter (<=1kb)	Hyper	protamine 2	ENSG00000122304.Promoter	Promoter	Fibroblast	no
ENSG00000122420	PTGFR	1	78494765	78494899	Fibroblast.47XYY-Fibroblast.46XY	135	16	92.9508	Intron (ENST00000370758/ENSG00000122420, intron 3 of 3)	Hyper	prostaglandin F receptor	ENSG00000122420.GeneBody	GeneBody	Fibroblast	no		1441.77	0.835917	0.305856	2.73304	0.00627531	0.0346432	up
ENSG00000122515	ZMIZ2	7	44756155	44756225	Fibroblast.47XYY-Fibroblast.46XY	71	4	17.398	Promoter (<=1kb)	Hyper	zinc finger MIZ-type containing 2	ENSG00000122515.Promoter	Promoter	Fibroblast	no		3018.33	-0.188671	0.185445	-1.0174	0.308963	0.549864	not sig
ENSG00000122547	EEPD1	7	36258965	36259105	Fibroblast.47XYY-Fibroblast.46XY	141	6	30.5869	Intron (ENST00000242108/ENSG00000122547, intron 3 of 7)	Hyper	endonuclease/exonuclease/phosphatase family domain containing 1	ENSG00000122547.GeneBody	GeneBody	Fibroblast	no		287.064	-0.0106567	0.297601	-0.0358086	0.971435	0.987508	not sig
ENSG00000122574	WIPF3	7	29805980	29806059	Fibroblast.47XYY-Fibroblast.46XY	80	6	-26.3146	Promoter (<=1kb)	Hypo	WAS/WASL interacting protein family member 3	ENSG00000122574.Promoter	Promoter	Fibroblast	no
ENSG00000122585	NPY	7	24270285	24270420	Fibroblast.47XYY-Fibroblast.46XY	136	14	80.8229	Distal Intergenic	Hyper	neuropeptide Y	ENSG00000122585.Intergenic	Intergenic	Fibroblast	no
ENSG00000122592	HOXA7	7	27157377	27157588	Fibroblast.47XYY-Fibroblast.46XY	212	10	-49.1411	Promoter (<=1kb)	Hypo	homeobox A7	ENSG00000122592.Promoter	Promoter	Fibroblast	no		37.2064	0.343435	0.641325	0.535508	0.592299	0.777933	not sig
ENSG00000122592	HOXA7	7	27155478	27155584	Fibroblast.47XYY-Fibroblast.46XY	107	4	-23.4904	Promoter (<=1kb)	Hypo	homeobox A7	ENSG00000122592.Promoter	Promoter	Fibroblast	no		37.2064	0.343435	0.641325	0.535508	0.592299	0.777933	not sig
ENSG00000122694	GLIPR2	9	36148447	36148591	Fibroblast.47XYY-Fibroblast.46XY	145	7	37.3847	Exon (ENST00000377960/ENSG00000122694, exon 3 of 5)	Hyper	GLI pathogenesis related 2	ENSG00000122694.GeneBody	GeneBody	Fibroblast	no		2622.36	0.631123	0.138011	4.57301	4.80776e-06	7.52438e-05	up
ENSG00000122696	SLC25A51	9	37914338	37914455	Fibroblast.47XYY-Fibroblast.46XY	118	6	38.9714	Intron (ENST00000540557/ENSG00000255872, intron 6 of 11)	Hyper	solute carrier family 25 member 51	ENSG00000122696.GeneBody	GeneBody	Fibroblast	no		445.834	-0.167973	0.111944	-1.5005	0.133485	0.327246	not sig
ENSG00000122705	CLTA	9	36206614	36206787	Fibroblast.47XYY-Fibroblast.46XY	174	9	49.8171	Intron (ENST00000433436/ENSG00000122705, intron 4 of 6)	Hyper	clathrin light chain A	ENSG00000122705.GeneBody	GeneBody	Fibroblast	no		6522.72	-0.200746	0.211721	-0.948159	0.343049	0.583075	not sig
ENSG00000122778	KIAA1549	7	138969684	138969860	Fibroblast.47XYY-Fibroblast.46XY	177	4	25.9405	Intron (ENST00000440172/ENSG00000122778, intron 1 of 19)	Hyper	KIAA1549	ENSG00000122778.GeneBody	GeneBody	Fibroblast	no		870.022	0.990337	0.266703	3.71326	0.000204603	0.00201386	up
ENSG00000122863	CHST3	10	71922560	71922680	Fibroblast.47XYY-Fibroblast.46XY	121	10	57.1955	Distal Intergenic	Hyper	carbohydrate sulfotransferase 3	ENSG00000122863.Intergenic	Intergenic	Fibroblast	no		4519.51	-0.493427	0.191393	-2.57809	0.00993488	0.049633	not sig
ENSG00000123131	PRDX4	X	23689601	23689709	Fibroblast.47XYY-Fibroblast.46XY	109	7	34.5537	Distal Intergenic	Hyper	peroxiredoxin 4	ENSG00000123131.Intergenic	Intergenic	Fibroblast	no	inactive	6216.9	0.115548	0.197043	0.586412	0.557599	0.756038	not sig
ENSG00000123136	DDX39A	19	14417342	14417482	Fibroblast.47XYY-Fibroblast.46XY	141	13	75.0647	Promoter (1-2kb)	Hyper	DExD-box helicase 39A	ENSG00000123136.Promoter	Promoter	Fibroblast	no		2328.03	-0.108857	0.209273	-0.520167	0.602947	0.785165	not sig
ENSG00000123358	NR4A1	12	52046704	52046778	Fibroblast.47XYY-Fibroblast.46XY	75	7	-44.9637	Promoter (2-3kb)	Hypo	nuclear receptor subfamily 4 group A member 1	ENSG00000123358.Promoter	Promoter	Fibroblast	no		880.013	0.615478	0.280501	2.19421	0.0282204	0.109604	not sig
ENSG00000123374	CDK2	12	55971094	55971188	Fibroblast.47XYY-Fibroblast.46XY	95	4	19.3347	Promoter (<=1kb)	Hyper	cyclin dependent kinase 2	ENSG00000123374.Promoter	Promoter	Fibroblast	no		1167.2	-0.235446	0.220594	-1.06733	0.285824	0.524001	not sig
ENSG00000123569	H2BW1	X	104014026	104014148	Fibroblast.47XYY-Fibroblast.46XY	123	8	40.3044	Promoter (<=1kb)	Hyper	H2B.W histone 1	ENSG00000123569.Promoter	Promoter	Fibroblast	no
ENSG00000123810	B9D2	19	41368569	41368705	Fibroblast.47XYY-Fibroblast.46XY	137	4	25.5809	Intron (ENST00000604424/ENSG00000255730, intron 1 of 1)	Hyper	B9 domain containing 2	ENSG00000123810.GeneBody	GeneBody	Fibroblast	no		125.029	0.173251	0.197398	0.877672	0.380122	0.617053	not sig
ENSG00000123908	AGO2	8	140532318	140532452	Fibroblast.47XYY-Fibroblast.46XY	135	4	-19.3952	Promoter (<=1kb)	Hypo	argonaute RISC catalytic component 2	ENSG00000123908.Promoter	Promoter	Fibroblast	no		2882.36	-0.0913318	0.191222	-0.477622	0.632919	0.805929	not sig
ENSG00000124092	CTCFL	20	57524564	57524668	Fibroblast.47XYY-Fibroblast.46XY	105	4	20.9262	Promoter (<=1kb)	Hyper	CCCTC-binding factor like	ENSG00000124092.Promoter	Promoter	Fibroblast	no
ENSG00000124104	SNX21	20	45836406	45836460	Fibroblast.47XYY-Fibroblast.46XY	55	7	32.3066	Promoter (1-2kb)	Hyper	sorting nexin family member 21	ENSG00000124104.Promoter	Promoter	Fibroblast	no		1544.48	-0.274122	0.196619	-1.39418	0.163264	0.373408	not sig
ENSG00000124203	ZNF831	20	59128854	59130339	Fibroblast.47XYY-Fibroblast.46XY	1486	6	31.9203	Intron (ENST00000637017/ENSG00000124203, intron 1 of 7)	Hyper	zinc finger protein 831	ENSG00000124203.GeneBody	GeneBody	Fibroblast	no
ENSG00000124212	PTGIS	20	49533696	49536637	Fibroblast.47XYY-Fibroblast.46XY	2942	7	31.8794	Intron (ENST00000244043/ENSG00000124212, intron 5 of 9)	Hyper	prostaglandin I2 synthase	ENSG00000124212.GeneBody	GeneBody	Fibroblast	no		3810.79	0.0393553	0.273745	0.143767	0.885685	0.945014	not sig
ENSG00000124216	SNAI1	20	50009988	50010101	Fibroblast.47XYY-Fibroblast.46XY	114	24	-114.37	Distal Intergenic	Hypo	snail family transcriptional repressor 1	ENSG00000124216.Intergenic	Intergenic	Fibroblast	no		772.787	-0.114747	0.286909	-0.399942	0.6892	0.837979	not sig
ENSG00000124225	PMEPA1	20	57699785	57699896	Fibroblast.47XYY-Fibroblast.46XY	112	4	19.9868	Intron (ENST00000395816/ENSG00000124225, intron 1 of 3)	Hyper	prostate transmembrane protein, androgen induced 1	ENSG00000124225.GeneBody	GeneBody	Fibroblast	no		1165.31	-0.30834	0.144549	-2.13311	0.0329154	0.122819	not sig
ENSG00000124253	PCK1	20	57570220	57570333	Fibroblast.47XYY-Fibroblast.46XY	114	9	38.9526	Distal Intergenic	Hyper	phosphoenolpyruvate carboxykinase 1	ENSG00000124253.Intergenic	Intergenic	Fibroblast	no
ENSG00000124299	PEPD	19	33393478	33393584	Fibroblast.47XYY-Fibroblast.46XY	107	12	54.5633	Promoter (1-2kb)	Hyper	peptidase D	ENSG00000124299.Promoter	Promoter	Fibroblast	no		2487.04	-0.507787	0.17087	-2.97177	0.00296091	0.018995	not sig
ENSG00000124302	CHST8	19	33671051	33671197	Fibroblast.47XYY-Fibroblast.46XY	147	6	26.842	Intron (ENST00000650847/ENSG00000124302, intron 2 of 4)	Hyper	carbohydrate sulfotransferase 8	ENSG00000124302.GeneBody	GeneBody	Fibroblast	no
ENSG00000124302	CHST8	19	33687483	33687599	Fibroblast.47XYY-Fibroblast.46XY	117	9	45.1639	Promoter (2-3kb)	Hyper	carbohydrate sulfotransferase 8	ENSG00000124302.Promoter	Promoter	Fibroblast	no
ENSG00000124380	SNRNP27	2	69895119	69895206	Fibroblast.47XYY-Fibroblast.46XY	88	21	50.3589	Promoter (1-2kb)	Hyper	small nuclear ribonucleoprotein U4/U6.U5 subunit 27	ENSG00000124380.Promoter	Promoter	Fibroblast	no		860.685	-0.0935232	0.173282	-0.539715	0.589394	0.776811	not sig
ENSG00000124399	NDUFB4P12	4	43927329	43927404	Fibroblast.47XYY-Fibroblast.46XY	76	14	74.3737	Intron (ENST00000655512/ENSG00000286891, intron 3 of 4)	Hyper	NADH:ubiquinone oxidoreductase subunit B4 pseudogene 12	ENSG00000124399.GeneBody	GeneBody	Fibroblast	no
ENSG00000124440	HIF3A	19	46301546	46301682	Fibroblast.47XYY-Fibroblast.46XY	137	11	53.1471	Promoter (1-2kb)	Hyper	hypoxia inducible factor 3 subunit alpha	ENSG00000124440.Promoter	Promoter	Fibroblast	no		36.2902	-0.58464	1.38282	-0.422789	0.672449	0.828082	not sig
ENSG00000124479	NDP	X	43972523	43972806	Fibroblast.47XYY-Fibroblast.46XY	284	14	-108.316	Promoter (<=1kb)	Hypo	norrin cystine knot growth factor NDP	ENSG00000124479.Promoter	Promoter	Fibroblast	no	variable
ENSG00000124507	PACSIN1	6	34526729	34526817	Fibroblast.47XYY-Fibroblast.46XY	89	8	32.2807	Intron (ENST00000620693/ENSG00000124507, intron 2 of 9)	Hyper	protein kinase C and casein kinase substrate in neurons 1	ENSG00000124507.GeneBody	GeneBody	Fibroblast	no
ENSG00000124574	ABCC10	6	43429678	43429737	Fibroblast.47XYY-Fibroblast.46XY	60	4	19.1883	Promoter (1-2kb)	Hyper	ATP binding cassette subfamily C member 10	ENSG00000124574.Promoter	Promoter	Fibroblast	no		1709	-0.270903	0.19311	-1.40284	0.160665	0.369468	not sig
ENSG00000124713	GNMT	6	42968248	42968371	Fibroblast.47XYY-Fibroblast.46XY	124	8	-37.1218	Exon (ENST00000304611/ENSG00000124587, exon 7 of 17)	Hypo	glycine N-methyltransferase	ENSG00000124713.GeneBody	GeneBody	Fibroblast	no
ENSG00000124772	CPNE5	6	36834404	36834512	Fibroblast.47XYY-Fibroblast.46XY	109	8	-53.717	Intron (ENST00000244751/ENSG00000124772, intron 1 of 20)	Hypo	copine 5	ENSG00000124772.GeneBody	GeneBody	Fibroblast	no
ENSG00000124785	NRN1	6	5998954	5999005	Fibroblast.47XYY-Fibroblast.46XY	52	7	29.2648	3' UTR	Hyper	neuritin 1	ENSG00000124785.GeneBody	GeneBody	Fibroblast	no		6862.35	-0.409693	0.195576	-2.09481	0.0361882	0.131647	not sig
ENSG00000124788	ATXN1	6	16726101	16726248	Fibroblast.47XYY-Fibroblast.46XY	148	7	35.5851	Intron (ENST00000244769/ENSG00000124788, intron 3 of 8)	Hyper	ataxin 1	ENSG00000124788.GeneBody	GeneBody	Fibroblast	no		3191.86	0.392342	0.0841356	4.66321	3.1131e-06	5.11454e-05	not sig
ENSG00000124900	TRIM51	11	55885533	55885768	Fibroblast.47XYY-Fibroblast.46XY	236	10	53.1343	Promoter (<=1kb)	Hyper	tripartite motif-containing 51	ENSG00000124900.Promoter	Promoter	Fibroblast	no
ENSG00000124915	MYRF-AS1	11	61742500	61742609	Fibroblast.47XYY-Fibroblast.46XY	110	7	37.6289	Intron (ENST00000257215/ENSG00000134780, intron 19 of 19)	Hyper	MYRF antisense RNA 1	ENSG00000124915.GeneBody	GeneBody	Fibroblast	no
ENSG00000125166	GOT2	16	58735588	58735664	Fibroblast.47XYY-Fibroblast.46XY	77	6	27.3126	Promoter (1-2kb)	Hyper	glutamic-oxaloacetic transaminase 2	ENSG00000125166.Promoter	Promoter	Fibroblast	no		2839.2	-0.119756	0.177332	-0.675318	0.499474	0.71433	not sig
ENSG00000125170	DOK4	16	57480283	57480545	Fibroblast.47XYY-Fibroblast.46XY	263	20	113.108	Promoter (<=1kb)	Hyper	docking protein 4	ENSG00000125170.Promoter	Promoter	Fibroblast	no		1410.82	-0.814013	0.18789	-4.3324	1.47492e-05	0.000203576	down
ENSG00000125522	NPBWR2	20	64113289	64113443	Fibroblast.47XYY-Fibroblast.46XY	155	11	58.1094	Intron (ENST00000644172/ENSG00000196132, intron 1 of 2)	Hyper	neuropeptides B and W receptor 2	ENSG00000125522.GeneBody	GeneBody	Fibroblast	no
ENSG00000125534	PPDPF	20	63524659	63524748	Fibroblast.47XYY-Fibroblast.46XY	90	8	43.3296	Distal Intergenic	Hyper	pancreatic progenitor cell differentiation and proliferation factor	ENSG00000125534.Intergenic	Intergenic	Fibroblast	no		4845.12	-0.217748	0.179342	-1.21415	0.224691	0.454787	not sig
ENSG00000125650	PSPN	19	6376532	6376640	Fibroblast.47XYY-Fibroblast.46XY	109	13	72.3502	Promoter (<=1kb)	Hyper	persephin	ENSG00000125650.Promoter	Promoter	Fibroblast	no		85.2344	0.133867	0.175516	0.762707	0.445638	0.672274	not sig
ENSG00000125650	PSPN	19	6376374	6376465	Fibroblast.47XYY-Fibroblast.46XY	92	5	27.3253	Promoter (<=1kb)	Hyper	persephin	ENSG00000125650.Promoter	Promoter	Fibroblast	no		85.2344	0.133867	0.175516	0.762707	0.445638	0.672274	not sig
ENSG00000125652	ALKBH7	19	6374315	6374427	Fibroblast.47XYY-Fibroblast.46XY	113	13	61.7705	Promoter (<=1kb)	Hyper	alkB homolog 7	ENSG00000125652.Promoter	Promoter	Fibroblast	no		639.377	-0.166978	0.202435	-0.82485	0.409457	0.643948	not sig
ENSG00000125703	ATG4C	1	62746157	62746288	Fibroblast.47XYY-Fibroblast.46XY	132	10	69.7394	Distal Intergenic	Hyper	autophagy related 4C cysteine peptidase	ENSG00000125703.Intergenic	Intergenic	Fibroblast	no		401.579	-0.0986643	0.1846	-0.534477	0.593011	0.77846	not sig
ENSG00000125741	OPA3	19	45578543	45578614	Fibroblast.47XYY-Fibroblast.46XY	72	7	42.3464	Intron (ENST00000323060/ENSG00000125741, intron 1 of 1)	Hyper	outer mitochondrial membrane lipid metabolism regulator OPA3	ENSG00000125741.GeneBody	GeneBody	Fibroblast	no		1149.34	-0.169111	0.178367	-0.94811	0.343074	0.583075	not sig
ENSG00000125780	TGM3	20	2299685	2299819	Fibroblast.47XYY-Fibroblast.46XY	135	4	-19.6809	Intron (ENST00000651531/ENSG00000286022, intron 2 of 13)	Hypo	transglutaminase 3	ENSG00000125780.GeneBody	GeneBody	Fibroblast	no
ENSG00000125813	PAX1	20	21707078	21707159	Fibroblast.47XYY-Fibroblast.46XY	82	9	-53.0001	Promoter (<=1kb)	Hypo	paired box 1	ENSG00000125813.Promoter	Promoter	Fibroblast	no
ENSG00000125816	NKX2-4	20	21395792	21395895	Fibroblast.47XYY-Fibroblast.46XY	104	18	-79.8072	Promoter (1-2kb)	Hypo	NK2 homeobox 4	ENSG00000125816.Promoter	Promoter	Fibroblast	no
ENSG00000125821	DTD1	20	18589121	18589207	Fibroblast.47XYY-Fibroblast.46XY	87	4	-19.1425	Promoter (1-2kb)	Hypo	D-aminoacyl-tRNA deacylase 1	ENSG00000125821.Promoter	Promoter	Fibroblast	no		568.278	-0.169108	0.136397	-1.23983	0.215039	0.442743	not sig
ENSG00000125851	PCSK2	20	17264955	17265072	Fibroblast.47XYY-Fibroblast.46XY	118	6	36.8989	Intron (ENST00000377899/ENSG00000125851, intron 3 of 12)	Hyper	proprotein convertase subtilisin/kexin type 2	ENSG00000125851.GeneBody	GeneBody	Fibroblast	no
ENSG00000125898	FAM110A	20	818972	819049	Fibroblast.47XYY-Fibroblast.46XY	78	18	89.5915	Distal Intergenic	Hyper	family with sequence similarity 110 member A	ENSG00000125898.Intergenic	Intergenic	Fibroblast	no		133.397	-0.492323	0.178303	-2.76116	0.00575963	0.0324846	not sig
ENSG00000125912	NCLN	19	3203397	3203505	Fibroblast.47XYY-Fibroblast.46XY	109	5	20.9974	Promoter (<=1kb)	Hyper	nicalin	ENSG00000125912.Promoter	Promoter	Fibroblast	no		4056.22	-0.512566	0.177984	-2.87985	0.00397865	0.0239535	not sig
ENSG00000126214	KLC1	14	103559974	103560060	Fibroblast.47XYY-Fibroblast.46XY	87	9	42.4719	Promoter (1-2kb)	Hyper	kinesin light chain 1	ENSG00000126214.Promoter	Promoter	Fibroblast	no		1545.81	-0.117069	0.211033	-0.554741	0.579072	0.769513	not sig
ENSG00000126217	MCF2L	13	112911366	112911485	Fibroblast.47XYY-Fibroblast.46XY	120	15	67.0215	Intron (ENST00000375608/ENSG00000126217, intron 2 of 29)	Hyper	MCF.2 cell line derived transforming sequence like	ENSG00000126217.GeneBody	GeneBody	Fibroblast	no
ENSG00000126217	MCF2L	13	113085602	113085675	Fibroblast.47XYY-Fibroblast.46XY	74	5	24.1332	Promoter (<=1kb)	Hyper	MCF.2 cell line derived transforming sequence like	ENSG00000126217.Promoter	Promoter	Fibroblast	no
ENSG00000126217	MCF2L	13	112976697	112976773	Fibroblast.47XYY-Fibroblast.46XY	77	5	26.0195	Promoter (2-3kb)	Hyper	MCF.2 cell line derived transforming sequence like	ENSG00000126217.Promoter	Promoter	Fibroblast	no
ENSG00000126262	FFAR2	19	35467608	35467660	Fibroblast.47XYY-Fibroblast.46XY	53	4	19.398	Distal Intergenic	Hyper	free fatty acid receptor 2	ENSG00000126262.Intergenic	Intergenic	Fibroblast	no
ENSG00000126368	NR1D1	17	40101682	40101818	Fibroblast.47XYY-Fibroblast.46XY	137	6	29.3293	Promoter (1-2kb)	Hyper	nuclear receptor subfamily 1 group D member 1	ENSG00000126368.Promoter	Promoter	Fibroblast	no		835.275	0.588686	0.221134	2.66213	0.00776488	0.0409469	up
ENSG00000126453	BCL2L12	19	49672109	49672235	Fibroblast.47XYY-Fibroblast.46XY	127	12	50.1666	Promoter (<=1kb)	Hyper	BCL2 like 12	ENSG00000126453.Promoter	Promoter	Fibroblast	no		481.948	0.303241	0.218086	1.39047	0.164387	0.375104	not sig
ENSG00000126464	PRR12	19	49613878	49614033	Fibroblast.47XYY-Fibroblast.46XY	156	14	86.1241	Intron (ENST00000418929/ENSG00000126464, intron 6 of 13)	Hyper	proline rich 12	ENSG00000126464.GeneBody	GeneBody	Fibroblast	no		1973.62	-0.0398283	0.160537	-0.248094	0.804062	0.902136	not sig
ENSG00000126500	FLRT1	11	64102835	64102927	Fibroblast.47XYY-Fibroblast.46XY	93	4	-19.5695	Promoter (<=1kb)	Hypo	fibronectin leucine rich transmembrane protein 1	ENSG00000126500.Promoter	Promoter	Fibroblast	no
ENSG00000126705	AHDC1	1	27576227	27576368	Fibroblast.47XYY-Fibroblast.46XY	142	10	45.4714	Intron (ENST00000247087/ENSG00000126705, intron 1 of 5)	Hyper	AT-hook DNA binding motif containing 1	ENSG00000126705.GeneBody	GeneBody	Fibroblast	no		1604.21	-0.171367	0.197247	-0.868794	0.38496	0.622314	not sig
ENSG00000127445	PIN1	19	9842566	9842757	Fibroblast.47XYY-Fibroblast.46XY	192	17	86.2038	Intron (ENST00000247970/ENSG00000127445, intron 2 of 3)	Hyper	peptidylprolyl cis/trans isomerase, NIMA-interacting 1	ENSG00000127445.GeneBody	GeneBody	Fibroblast	no		1537.2	0.0600142	0.133783	0.448595	0.653724	0.818332	not sig
ENSG00000127445	PIN1	19	9846272	9846393	Fibroblast.47XYY-Fibroblast.46XY	122	8	53.6308	Intron (ENST00000247970/ENSG00000127445, intron 2 of 3)	Hyper	peptidylprolyl cis/trans isomerase, NIMA-interacting 1	ENSG00000127445.GeneBody	GeneBody	Fibroblast	no		1537.2	0.0600142	0.133783	0.448595	0.653724	0.818332	not sig
ENSG00000127540	UQCR11	19	1606608	1606678	Fibroblast.47XYY-Fibroblast.46XY	71	7	40.9329	Promoter (1-2kb)	Hyper	ubiquinol-cytochrome c reductase, complex III subunit XI	ENSG00000127540.Promoter	Promoter	Fibroblast	no		457.26	-0.156996	0.150352	-1.04419	0.296397	0.536023	not sig
ENSG00000127616	SMARCA4	19	11054959	11055090	Fibroblast.47XYY-Fibroblast.46XY	132	5	25.265	Intron (ENST00000643549/ENSG00000127616, intron 30 of 34)	Hyper	SWI/SNF related, matrix associated, actin dependent regulator of chromatin, subfamily a, member 4	ENSG00000127616.GeneBody	GeneBody	Fibroblast	no		5603.21	-0.0501306	0.150139	-0.333895	0.738459	0.867281	not sig
ENSG00000127616	SMARCA4	19	11060564	11060641	Fibroblast.47XYY-Fibroblast.46XY	78	5	22.7023	Promoter (<=1kb)	Hyper	SWI/SNF related, matrix associated, actin dependent regulator of chromatin, subfamily a, member 4	ENSG00000127616.Promoter	Promoter	Fibroblast	no		5603.21	-0.0501306	0.150139	-0.333895	0.738459	0.867281	not sig
ENSG00000127663	KDM4B	19	4977534	4977922	Fibroblast.47XYY-Fibroblast.46XY	389	34	198.126	Intron (ENST00000611640/ENSG00000127663, intron 1 of 23)	Hyper	lysine demethylase 4B	ENSG00000127663.GeneBody	GeneBody	Fibroblast	no		2933.01	0.307826	0.214587	1.4345	0.151428	0.354963	not sig
ENSG00000127666	TICAM1	19	4830179	4830236	Fibroblast.47XYY-Fibroblast.46XY	58	5	32.6067	Promoter (1-2kb)	Hyper	TIR domain containing adaptor molecule 1	ENSG00000127666.Promoter	Promoter	Fibroblast	no		1052.37	-0.233929	0.142186	-1.64523	0.0999227	0.272444	not sig
ENSG00000127780	OR1E2	17	3434905	3435040	Fibroblast.47XYY-Fibroblast.46XY	136	14	77.9635	Promoter (1-2kb)	Hyper	olfactory receptor family 1 subfamily E member 2	ENSG00000127780.Promoter	Promoter	Fibroblast	no
ENSG00000128040	SPINK2	4	56848928	56849034	Fibroblast.47XYY-Fibroblast.46XY	107	9	46.7131	Distal Intergenic	Hyper	serine peptidase inhibitor Kazal type 2	ENSG00000128040.Intergenic	Intergenic	Fibroblast	no
ENSG00000128159	TUBGCP6	22	50242903	50243474	Fibroblast.47XYY-Fibroblast.46XY	572	20	128.389	Promoter (1-2kb)	Hyper	tubulin gamma complex associated protein 6	ENSG00000128159.Promoter	Promoter	Fibroblast	no		2608.38	-0.0100522	0.194243	-0.0517509	0.958727	0.981697	not sig
ENSG00000128268	MGAT3	22	39466804	39466924	Fibroblast.47XYY-Fibroblast.46XY	121	4	20.1	Intron (ENST00000341184/ENSG00000128268, intron 1 of 1)	Hyper	beta-1,4-mannosyl-glycoprotein 4-beta-N-acetylglucosaminyltransferase	ENSG00000128268.GeneBody	GeneBody	Fibroblast	no
ENSG00000128271	ADORA2A	22	24419771	24419872	Fibroblast.47XYY-Fibroblast.46XY	102	8	37.8007	Promoter (1-2kb)	Hyper	adenosine A2a receptor	ENSG00000128271.Promoter	Promoter	Fibroblast	no
ENSG00000128274	A4GALT	22	42729921	42729971	Fibroblast.47XYY-Fibroblast.46XY	51	9	55.0389	Distal Intergenic	Hyper	alpha 1,4-galactosyltransferase (P blood group)	ENSG00000128274.Intergenic	Intergenic	Fibroblast	no		1003.55	-0.545333	0.201594	-2.7051	0.0068284	0.0369374	not sig
ENSG00000128274	A4GALT	22	42699243	42699536	Fibroblast.47XYY-Fibroblast.46XY	294	18	94.2994	Intron (ENST00000642412/ENSG00000128274, intron 1 of 2)	Hyper	alpha 1,4-galactosyltransferase (P blood group)	ENSG00000128274.GeneBody	GeneBody	Fibroblast	no		1003.55	-0.545333	0.201594	-2.7051	0.0068284	0.0369374	not sig
ENSG00000128285	MCHR1	22	40684988	40685124	Fibroblast.47XYY-Fibroblast.46XY	137	10	-38.1869	Distal Intergenic	Hypo	melanin concentrating hormone receptor 1	ENSG00000128285.Intergenic	Intergenic	Fibroblast	no
ENSG00000128573	FOXP2	7	114244952	114245057	Fibroblast.47XYY-Fibroblast.46XY	106	12	58.1926	Intron (ENST00000412402/ENSG00000128573, intron 1 of 19)	Hyper	forkhead box P2	ENSG00000128573.GeneBody	GeneBody	Fibroblast	no		85.6707	2.25999	1.09024	2.07293	0.0381788	0.137199	not sig
ENSG00000128596	CCDC136	7	128790363	128790444	Fibroblast.47XYY-Fibroblast.46XY	82	10	-46.6212	Promoter (<=1kb)	Hypo	coiled-coil domain containing 136	ENSG00000128596.Promoter	Promoter	Fibroblast	no		630.038	0.0517066	0.198268	0.260791	0.794254	0.898151	not sig
ENSG00000128604	IRF5	7	128940654	128940737	Fibroblast.47XYY-Fibroblast.46XY	84	10	36.846	Promoter (<=1kb)	Hyper	interferon regulatory factor 5	ENSG00000128604.Promoter	Promoter	Fibroblast	no
ENSG00000128652	HOXD3	2	176159980	176160127	Fibroblast.47XYY-Fibroblast.46XY	148	26	106.379	Promoter (<=1kb)	Hyper	homeobox D3	ENSG00000128652.Promoter	Promoter	Fibroblast	no		306.361	0.125986	0.29175	0.43183	0.665865	0.824776	not sig
ENSG00000128652	HOXD3	2	176160331	176160424	Fibroblast.47XYY-Fibroblast.46XY	94	11	53.9666	Promoter (<=1kb)	Hyper	homeobox D3	ENSG00000128652.Promoter	Promoter	Fibroblast	no		306.361	0.125986	0.29175	0.43183	0.665865	0.824776	not sig
ENSG00000128652	HOXD3	2	176160540	176160666	Fibroblast.47XYY-Fibroblast.46XY	127	15	71.6717	Promoter (<=1kb)	Hyper	homeobox D3	ENSG00000128652.Promoter	Promoter	Fibroblast	no		306.361	0.125986	0.29175	0.43183	0.665865	0.824776	not sig
ENSG00000128683	GAD1	2	170822240	170822472	Fibroblast.47XYY-Fibroblast.46XY	233	31	-157.661	Promoter (<=1kb)	Hypo	glutamate decarboxylase 1	ENSG00000128683.Promoter	Promoter	Fibroblast	no		140.108	-1.60078	0.394875	-4.05388	5.03743e-05	0.000597838	down
ENSG00000128683	GAD1	2	170823127	170823239	Fibroblast.47XYY-Fibroblast.46XY	113	13	-67.1631	Promoter (1-2kb)	Hypo	glutamate decarboxylase 1	ENSG00000128683.Promoter	Promoter	Fibroblast	no		140.108	-1.60078	0.394875	-4.05388	5.03743e-05	0.000597838	down
ENSG00000128683	GAD1	2	170821707	170821783	Fibroblast.47XYY-Fibroblast.46XY	77	10	-42.0426	Promoter (<=1kb)	Hypo	glutamate decarboxylase 1	ENSG00000128683.Promoter	Promoter	Fibroblast	no		140.108	-1.60078	0.394875	-4.05388	5.03743e-05	0.000597838	down
ENSG00000128683	GAD1	2	170823318	170823519	Fibroblast.47XYY-Fibroblast.46XY	202	28	-137.635	Promoter (1-2kb)	Hypo	glutamate decarboxylase 1	ENSG00000128683.Promoter	Promoter	Fibroblast	no		140.108	-1.60078	0.394875	-4.05388	5.03743e-05	0.000597838	down
ENSG00000128683	GAD1	2	170818866	170819012	Fibroblast.47XYY-Fibroblast.46XY	147	28	-110.188	Promoter (<=1kb)	Hypo	glutamate decarboxylase 1	ENSG00000128683.Promoter	Promoter	Fibroblast	no		140.108	-1.60078	0.394875	-4.05388	5.03743e-05	0.000597838	down
ENSG00000128805	ARHGAP22	10	48465539	48465647	Fibroblast.47XYY-Fibroblast.46XY	109	6	35.8275	Promoter (1-2kb)	Hyper	Rho GTPase activating protein 22	ENSG00000128805.Promoter	Promoter	Fibroblast	no		1435.62	-0.198396	0.186982	-1.06104	0.28867	0.528196	not sig
ENSG00000128908	INO80	15	40982765	40982919	Fibroblast.47XYY-Fibroblast.46XY	155	10	76.1616	Promoter (<=1kb)	Hyper	INO80 complex ATPase subunit	ENSG00000128908.Promoter	Promoter	Fibroblast	no		1786.29	-0.17829	0.134397	-1.3266	0.184642	0.40293	not sig
ENSG00000128923	MINDY2	15	58785825	58785893	Fibroblast.47XYY-Fibroblast.46XY	69	5	21.7699	Intron (ENST00000316848/ENSG00000128923, intron 1 of 7)	Hyper	MINDY lysine 48 deubiquitinase 2	ENSG00000128923.GeneBody	GeneBody	Fibroblast	no		2783.99	-0.0796481	0.206559	-0.385596	0.699796	0.844429	not sig
ENSG00000129038	LOXL1	15	73923463	73923547	Fibroblast.47XYY-Fibroblast.46XY	85	6	24.5899	Promoter (2-3kb)	Hyper	lysyl oxidase like 1	ENSG00000129038.Promoter	Promoter	Fibroblast	no		14193	0.631509	0.155058	4.07272	4.64664e-05	0.000558994	up
ENSG00000129084	PSMA1	11	14549422	14549557	Fibroblast.47XYY-Fibroblast.46XY	136	8	39.3679	Intron (ENST00000418988/ENSG00000129084, intron 2 of 10)	Hyper	proteasome 20S subunit alpha 1	ENSG00000129084.GeneBody	GeneBody	Fibroblast	no		610.062	0.224646	0.137735	1.631	0.10289	0.277589	not sig
ENSG00000129204	USP6	17	5138807	5138863	Fibroblast.47XYY-Fibroblast.46XY	57	5	23.4804	Intron (ENST00000574788/ENSG00000129204, intron 21 of 37)	Hyper	ubiquitin specific peptidase 6	ENSG00000129204.GeneBody	GeneBody	Fibroblast	no
ENSG00000129355	CDKN2D	19	10573017	10573075	Fibroblast.47XYY-Fibroblast.46XY	59	4	17.4092	3' UTR	Hyper	cyclin dependent kinase inhibitor 2D	ENSG00000129355.GeneBody	GeneBody	Fibroblast	no		389.948	0.0149306	0.176318	0.0846796	0.932516	0.968339	not sig
ENSG00000129521	EGLN3	14	34173139	34173269	Fibroblast.47XYY-Fibroblast.46XY	131	4	24.6122	Intron (ENST00000487915/ENSG00000129521, intron 2 of 5)	Hyper	egl-9 family hypoxia inducible factor 3	ENSG00000129521.GeneBody	GeneBody	Fibroblast	no
ENSG00000129682	FGF13	X	138972516	138972651	Fibroblast.47XYY-Fibroblast.46XY	136	12	71.9287	Intron (ENST00000441825/ENSG00000129682, intron 2 of 6)	Hyper	fibroblast growth factor 13	ENSG00000129682.GeneBody	GeneBody	Fibroblast	no	variable	198.872	4.17083	1.62286	2.57005	0.0101684	0.0506273	not sig
ENSG00000129910	CDH15	16	89174913	89175064	Fibroblast.47XYY-Fibroblast.46XY	152	16	73.6585	Intron (ENST00000289746/ENSG00000129910, intron 1 of 13)	Hyper	cadherin 15	ENSG00000129910.GeneBody	GeneBody	Fibroblast	no
ENSG00000129910	CDH15	16	89169233	89169292	Fibroblast.47XYY-Fibroblast.46XY	60	4	18.9504	Promoter (2-3kb)	Hyper	cadherin 15	ENSG00000129910.Promoter	Promoter	Fibroblast	no
ENSG00000129933	MAU2	19	19361510	19364943	Fibroblast.47XYY-Fibroblast.46XY	3434	13	63.8835	Distal Intergenic	Hyper	MAU2 sister chromatid cohesion factor	ENSG00000129933.Intergenic	Intergenic	Fibroblast	no		2144.86	-0.135571	0.173684	-0.78056	0.435061	0.664438	not sig
ENSG00000129946	SHC2	19	436367	436439	Fibroblast.47XYY-Fibroblast.46XY	73	11	62.2665	Promoter (<=1kb)	Hyper	SHC adaptor protein 2	ENSG00000129946.Promoter	Promoter	Fibroblast	no
ENSG00000129993	CBFA2T3	16	88972962	88973103	Fibroblast.47XYY-Fibroblast.46XY	142	10	47.6994	Intron (ENST00000268679/ENSG00000129993, intron 1 of 11)	Hyper	CBFA2/RUNX1 partner transcriptional co-repressor 3	ENSG00000129993.GeneBody	GeneBody	Fibroblast	no
ENSG00000129993	CBFA2T3	16	88952117	88952227	Fibroblast.47XYY-Fibroblast.46XY	111	7	34.9441	Intron (ENST00000268679/ENSG00000129993, intron 1 of 11)	Hyper	CBFA2/RUNX1 partner transcriptional co-repressor 3	ENSG00000129993.GeneBody	GeneBody	Fibroblast	no
ENSG00000130045	NXNL2	9	88535875	88536021	Fibroblast.47XYY-Fibroblast.46XY	147	17	-86.5901	Promoter (<=1kb)	Hypo	nucleoredoxin like 2	ENSG00000130045.Promoter	Promoter	Fibroblast	no		46.2176	0.226559	0.289439	0.782752	0.433773	0.663621	not sig
ENSG00000130052	STARD8	X	68686757	68686839	Fibroblast.47XYY-Fibroblast.46XY	83	6	-22.9642	Intron (ENST00000252336/ENSG00000130052, intron 2 of 13)	Hypo	StAR related lipid transfer domain containing 8	ENSG00000130052.GeneBody	GeneBody	Fibroblast	no	inactive	294.724	0.569671	0.243057	2.34377	0.0190898	0.0818043	not sig
ENSG00000130052	STARD8	X	68651445	68651513	Fibroblast.47XYY-Fibroblast.46XY	69	5	-25.0416	Intron (ENST00000488088/ENSG00000130052, intron 1 of 1)	Hypo	StAR related lipid transfer domain containing 8	ENSG00000130052.GeneBody	GeneBody	Fibroblast	no	inactive	294.724	0.569671	0.243057	2.34377	0.0190898	0.0818043	not sig
ENSG00000130164	LDLR	19	11084166	11084234	Fibroblast.47XYY-Fibroblast.46XY	69	4	23.0469	Distal Intergenic	Hyper	low density lipoprotein receptor	ENSG00000130164.Intergenic	Intergenic	Fibroblast	no		4569.36	-0.0670013	0.192865	-0.3474	0.728291	0.860542	not sig
ENSG00000130167	TSPAN16	19	11288664	11288800	Fibroblast.47XYY-Fibroblast.46XY	137	8	43.6247	Distal Intergenic	Hyper	tetraspanin 16	ENSG00000130167.Intergenic	Intergenic	Fibroblast	no
ENSG00000130222	GADD45G	9	89606121	89606483	Fibroblast.47XYY-Fibroblast.46XY	363	60	349.882	Promoter (1-2kb)	Hyper	growth arrest and DNA damage inducible gamma	ENSG00000130222.Promoter	Promoter	Fibroblast	no
ENSG00000130226	DPP6	7	153923487	153923617	Fibroblast.47XYY-Fibroblast.46XY	131	8	34.8069	Intron (ENST00000404039/ENSG00000130226, intron 1 of 25)	Hyper	dipeptidyl peptidase like 6	ENSG00000130226.GeneBody	GeneBody	Fibroblast	no
ENSG00000130226	DPP6	7	154332231	154332351	Fibroblast.47XYY-Fibroblast.46XY	121	5	23.5626	Intron (ENST00000404039/ENSG00000130226, intron 1 of 25)	Hyper	dipeptidyl peptidase like 6	ENSG00000130226.GeneBody	GeneBody	Fibroblast	no
ENSG00000130294	KIF1A	2	240836764	240836934	Fibroblast.47XYY-Fibroblast.46XY	171	11	70.3816	Distal Intergenic	Hyper	kinesin family member 1A	ENSG00000130294.Intergenic	Intergenic	Fibroblast	no
ENSG00000130294	KIF1A	2	240795998	240796115	Fibroblast.47XYY-Fibroblast.46XY	118	6	32.4906	Promoter (1-2kb)	Hyper	kinesin family member 1A	ENSG00000130294.Promoter	Promoter	Fibroblast	no
ENSG00000130300	PLVAP	19	17382130	17382254	Fibroblast.47XYY-Fibroblast.46XY	125	4	20.0868	Distal Intergenic	Hyper	plasmalemma vesicle associated protein	ENSG00000130300.Intergenic	Intergenic	Fibroblast	no
ENSG00000130309	COLGALT1	19	17565315	17565365	Fibroblast.47XYY-Fibroblast.46XY	51	5	20.4991	Promoter (<=1kb)	Hyper	collagen beta(1-O)galactosyltransferase 1	ENSG00000130309.Promoter	Promoter	Fibroblast	no		11045.5	-0.776076	0.172608	-4.49618	6.91837e-06	0.000104202	down
ENSG00000130309	COLGALT1	19	17560356	17560480	Fibroblast.47XYY-Fibroblast.46XY	125	14	56.5655	Exon (ENST00000252599/ENSG00000130309, exon 3 of 12)	Hyper	collagen beta(1-O)galactosyltransferase 1	ENSG00000130309.GeneBody	GeneBody	Fibroblast	no		11045.5	-0.776076	0.172608	-4.49618	6.91837e-06	0.000104202	down
ENSG00000130312	MRPL34	19	17293255	17293392	Fibroblast.47XYY-Fibroblast.46XY	138	16	78.3214	Promoter (<=1kb)	Hyper	mitochondrial ribosomal protein L34	ENSG00000130312.Promoter	Promoter	Fibroblast	no		465.531	-0.127555	0.116763	-1.09242	0.274647	0.512867	not sig
ENSG00000130338	TULP4	6	158208841	158208964	Fibroblast.47XYY-Fibroblast.46XY	124	12	-56.3933	Distal Intergenic	Hypo	TUB like protein 4	ENSG00000130338.Intergenic	Intergenic	Fibroblast	no		1081.18	-0.23778	0.124009	-1.91744	0.0551817	0.17993	not sig
ENSG00000130338	TULP4	6	158203338	158203438	Fibroblast.47XYY-Fibroblast.46XY	101	7	33.1077	Distal Intergenic	Hyper	TUB like protein 4	ENSG00000130338.Intergenic	Intergenic	Fibroblast	no		1081.18	-0.23778	0.124009	-1.91744	0.0551817	0.17993	not sig
ENSG00000130511	SSBP4	19	18425961	18426028	Fibroblast.47XYY-Fibroblast.46XY	68	5	33.0885	Promoter (<=1kb)	Hyper	single stranded DNA binding protein 4	ENSG00000130511.Promoter	Promoter	Fibroblast	no		1735.85	-0.234721	0.180935	-1.29727	0.19454	0.415763	not sig
ENSG00000130540	SULT4A1	22	43853585	43853752	Fibroblast.47XYY-Fibroblast.46XY	168	4	22.5743	Intron (ENST00000330884/ENSG00000130540, intron 1 of 6)	Hyper	sulfotransferase family 4A member 1	ENSG00000130540.GeneBody	GeneBody	Fibroblast	no
ENSG00000130544	ZNF557	19	7086521	7086656	Fibroblast.47XYY-Fibroblast.46XY	136	8	-43.9486	3' UTR	Hypo	zinc finger protein 557	ENSG00000130544.GeneBody	GeneBody	Fibroblast	no		283.086	-0.0359193	0.199547	-0.180004	0.857149	0.930016	not sig
ENSG00000130558	OLFM1	9	135089100	135089218	Fibroblast.47XYY-Fibroblast.46XY	119	13	-55.0642	Promoter (1-2kb)	Hypo	olfactomedin 1	ENSG00000130558.Promoter	Promoter	Fibroblast	no		307.96	-1.93506	0.358781	-5.39342	6.91298e-08	1.65124e-06	down
ENSG00000130558	OLFM1	9	135098550	135098706	Fibroblast.47XYY-Fibroblast.46XY	157	14	-63.8804	Promoter (2-3kb)	Hypo	olfactomedin 1	ENSG00000130558.Promoter	Promoter	Fibroblast	no		307.96	-1.93506	0.358781	-5.39342	6.91298e-08	1.65124e-06	down
ENSG00000130592	LSP1	11	1870220	1870491	Fibroblast.47XYY-Fibroblast.46XY	272	11	63.0643	Promoter (<=1kb)	Hyper	lymphocyte specific protein 1	ENSG00000130592.Promoter	Promoter	Fibroblast	no		65.0369	1.33361	0.447583	2.97959	0.00288633	0.0186069	up
ENSG00000130592	LSP1	11	1868822	1869248	Fibroblast.47XYY-Fibroblast.46XY	427	30	181.454	Promoter (<=1kb)	Hyper	lymphocyte specific protein 1	ENSG00000130592.Promoter	Promoter	Fibroblast	no		65.0369	1.33361	0.447583	2.97959	0.00288633	0.0186069	up
ENSG00000130592	LSP1	11	1871710	1872276	Fibroblast.47XYY-Fibroblast.46XY	567	17	100.885	Promoter (<=1kb)	Hyper	lymphocyte specific protein 1	ENSG00000130592.Promoter	Promoter	Fibroblast	no		65.0369	1.33361	0.447583	2.97959	0.00288633	0.0186069	up
ENSG00000130592	LSP1	11	1869846	1870167	Fibroblast.47XYY-Fibroblast.46XY	322	24	129.364	Promoter (<=1kb)	Hyper	lymphocyte specific protein 1	ENSG00000130592.Promoter	Promoter	Fibroblast	no		65.0369	1.33361	0.447583	2.97959	0.00288633	0.0186069	up
ENSG00000130635	COL5A1	9	134823467	134823519	Fibroblast.47XYY-Fibroblast.46XY	53	6	26.351	Promoter (<=1kb)	Hyper	collagen type V alpha 1 chain	ENSG00000130635.Promoter	Promoter	Fibroblast	no		158503	0.385293	0.181844	2.11881	0.0341064	0.126044	not sig
ENSG00000130669	PAK4	19	39171573	39171975	Fibroblast.47XYY-Fibroblast.46XY	403	20	-106.609	Promoter (2-3kb)	Hypo	p21 (RAC1) activated kinase 4	ENSG00000130669.Promoter	Promoter	Fibroblast	no		1260.18	0.00882738	0.149838	0.0589126	0.953022	0.978277	not sig
ENSG00000130702	LAMA5	20	62370905	62371028	Fibroblast.47XYY-Fibroblast.46XY	124	6	30.5946	Distal Intergenic	Hyper	laminin subunit alpha 5	ENSG00000130702.Intergenic	Intergenic	Fibroblast	no		105.661	2.28792	0.266353	8.58981	8.71151e-18	1.10645e-15	up
ENSG00000130702	LAMA5	20	62320704	62320839	Fibroblast.47XYY-Fibroblast.46XY	136	9	45.8218	Promoter (1-2kb)	Hyper	laminin subunit alpha 5	ENSG00000130702.Promoter	Promoter	Fibroblast	no		105.661	2.28792	0.266353	8.58981	8.71151e-18	1.10645e-15	up
ENSG00000130703	OSBPL2	20	62239763	62240013	Fibroblast.47XYY-Fibroblast.46XY	251	17	95.3039	Promoter (<=1kb)	Hyper	oxysterol binding protein like 2	ENSG00000130703.Promoter	Promoter	Fibroblast	no		2116.32	0.148616	0.176887	0.840176	0.40081	0.636762	not sig
ENSG00000130703	OSBPL2	20	62239445	62239701	Fibroblast.47XYY-Fibroblast.46XY	257	20	91.0049	Promoter (<=1kb)	Hyper	oxysterol binding protein like 2	ENSG00000130703.Promoter	Promoter	Fibroblast	no		2116.32	0.148616	0.176887	0.840176	0.40081	0.636762	not sig
ENSG00000130703	OSBPL2	20	62247084	62247188	Fibroblast.47XYY-Fibroblast.46XY	105	9	43.0832	Intron (ENST00000618509/ENSG00000130703, intron 1 of 2)	Hyper	oxysterol binding protein like 2	ENSG00000130703.GeneBody	GeneBody	Fibroblast	no		2116.32	0.148616	0.176887	0.840176	0.40081	0.636762	not sig
ENSG00000130707	ASS1	9	130503257	130503362	Fibroblast.47XYY-Fibroblast.46XY	106	6	30.9097	Distal Intergenic	Hyper	argininosuccinate synthase 1	ENSG00000130707.Intergenic	Intergenic	Fibroblast	no		3092.94	0.586962	0.409308	1.43403	0.151563	0.355215	not sig
ENSG00000130720	FIBCD1	9	130918988	130919151	Fibroblast.47XYY-Fibroblast.46XY	164	27	129.874	Intron (ENST00000448616/ENSG00000130720, intron 5 of 7)	Hyper	fibrinogen C domain containing 1	ENSG00000130720.GeneBody	GeneBody	Fibroblast	no		385.851	2.14336	0.404775	5.29518	1.18899e-07	2.69852e-06	up
ENSG00000130720	FIBCD1	9	130943229	130943335	Fibroblast.47XYY-Fibroblast.46XY	107	6	33.8419	Intron (ENST00000421067/ENSG00000236658, intron 1 of 2)	Hyper	fibrinogen C domain containing 1	ENSG00000130720.GeneBody	GeneBody	Fibroblast	no		385.851	2.14336	0.404775	5.29518	1.18899e-07	2.69852e-06	up
ENSG00000130733	YIPF2	19	10927029	10927170	Fibroblast.47XYY-Fibroblast.46XY	142	7	34.6789	Promoter (1-2kb)	Hyper	Yip1 domain family member 2	ENSG00000130733.Promoter	Promoter	Fibroblast	no		1839.87	-0.182379	0.173678	-1.0501	0.293672	0.533191	not sig
ENSG00000130734	ATG4D	19	10544673	10544799	Fibroblast.47XYY-Fibroblast.46XY	127	12	60.6765	Promoter (<=1kb)	Hyper	autophagy related 4D cysteine peptidase	ENSG00000130734.Promoter	Promoter	Fibroblast	no		345.172	0.0591148	0.177605	0.332844	0.739252	0.867595	not sig
ENSG00000130749	ZC3H4	19	47098047	47098225	Fibroblast.47XYY-Fibroblast.46XY	179	8	41.2353	Intron (ENST00000253048/ENSG00000130749, intron 2 of 14)	Hyper	zinc finger CCCH-type containing 4	ENSG00000130749.GeneBody	GeneBody	Fibroblast	no		1505.39	0.0505282	0.110261	0.458262	0.646764	0.813693	not sig
ENSG00000130762	ARHGEF16	1	3465614	3465720	Fibroblast.47XYY-Fibroblast.46XY	107	12	77.7799	Promoter (<=1kb)	Hyper	Rho guanine nucleotide exchange factor 16	ENSG00000130762.Promoter	Promoter	Fibroblast	no		65.8702	1.3125	0.432521	3.03453	0.00240907	0.0161121	up
ENSG00000130762	ARHGEF16	1	3461613	3461732	Fibroblast.47XYY-Fibroblast.46XY	120	14	65.1309	Intron (ENST00000378378/ENSG00000130762, intron 1 of 14)	Hyper	Rho guanine nucleotide exchange factor 16	ENSG00000130762.GeneBody	GeneBody	Fibroblast	no		65.8702	1.3125	0.432521	3.03453	0.00240907	0.0161121	up
ENSG00000130813	SHFL	19	10075760	10075867	Fibroblast.47XYY-Fibroblast.46XY	108	6	26.8973	Distal Intergenic	Hyper	shiftless antiviral inhibitor of ribosomal frameshifting	ENSG00000130813.Intergenic	Intergenic	Fibroblast	no		954.892	0.300206	0.200426	1.49784	0.134176	0.328574	not sig
ENSG00000130829	DUSP9	X	153639001	153639057	Fibroblast.47XYY-Fibroblast.46XY	57	4	-19.6582	Distal Intergenic	Hypo	dual specificity phosphatase 9	ENSG00000130829.Intergenic	Intergenic	Fibroblast	no	inactive
ENSG00000130856	ZNF236	18	76903342	76903460	Fibroblast.47XYY-Fibroblast.46XY	119	4	31.5618	Intron (ENST00000320610/ENSG00000130856, intron 11 of 30)	Hyper	zinc finger protein 236	ENSG00000130856.GeneBody	GeneBody	Fibroblast	no		797.376	-0.0302465	0.0982345	-0.307901	0.758158	0.879237	not sig
ENSG00000130940	CASZ1	1	10825938	10825989	Fibroblast.47XYY-Fibroblast.46XY	52	5	23.5733	Distal Intergenic	Hyper	castor zinc finger 1	ENSG00000130940.Intergenic	Intergenic	Fibroblast	no
ENSG00000131016	AKAP12	6	151247747	151247862	Fibroblast.47XYY-Fibroblast.46XY	116	6	53.5504	Intron (ENST00000402676/ENSG00000131016, intron 2 of 4)	Hyper	A-kinase anchoring protein 12	ENSG00000131016.GeneBody	GeneBody	Fibroblast	no		6702.37	0.661678	0.271676	2.43555	0.0148693	0.0677507	not sig
ENSG00000131018	SYNE1	6	152234454	152234527	Fibroblast.47XYY-Fibroblast.46XY	74	4	18.4709	Intron (ENST00000341594/ENSG00000131018, intron 113 of 147)	Hyper	spectrin repeat containing nuclear envelope protein 1	ENSG00000131018.GeneBody	GeneBody	Fibroblast	no		5393.66	0.136281	0.212639	0.640901	0.521587	0.731462	not sig
ENSG00000131023	LATS1	6	149718961	149719103	Fibroblast.47XYY-Fibroblast.46XY	143	25	121.526	Promoter (<=1kb)	Hyper	large tumor suppressor kinase 1	ENSG00000131023.Promoter	Promoter	Fibroblast	no		1963.02	-0.0406631	0.155597	-0.261336	0.793833	0.897906	not sig
ENSG00000131042	LILRB2	19	54278973	54279074	Fibroblast.47XYY-Fibroblast.46XY	102	6	26.9368	Promoter (<=1kb)	Hyper	leukocyte immunoglobulin like receptor B2	ENSG00000131042.Promoter	Promoter	Fibroblast	no
ENSG00000131042	LILRB2	19	54273490	54273550	Fibroblast.47XYY-Fibroblast.46XY	61	5	34.1386	Distal Intergenic	Hyper	leukocyte immunoglobulin like receptor B2	ENSG00000131042.Intergenic	Intergenic	Fibroblast	no
ENSG00000131050	BPIFA2	20	33161938	33162073	Fibroblast.47XYY-Fibroblast.46XY	136	12	62.7626	Promoter (<=1kb)	Hyper	BPI fold containing family A member 2	ENSG00000131050.Promoter	Promoter	Fibroblast	no
ENSG00000131126	TEX101	19	43408095	43408217	Fibroblast.47XYY-Fibroblast.46XY	123	21	136.262	Intron (ENST00000602198/ENSG00000131126, intron 3 of 7)	Hyper	testis expressed 101	ENSG00000131126.GeneBody	GeneBody	Fibroblast	no
ENSG00000131149	GSE1	16	85615409	85615535	Fibroblast.47XYY-Fibroblast.46XY	127	10	-50.2104	Promoter (2-3kb)	Hypo	Gse1 coiled-coil protein	ENSG00000131149.Promoter	Promoter	Fibroblast	no		4853.21	0.224807	0.146611	1.53335	0.125189	0.313359	not sig
ENSG00000131149	GSE1	16	85625220	85625316	Fibroblast.47XYY-Fibroblast.46XY	97	15	-69.973	Intron (ENST00000637419/ENSG00000131149, intron 2 of 2)	Hypo	Gse1 coiled-coil protein	ENSG00000131149.GeneBody	GeneBody	Fibroblast	no		4853.21	0.224807	0.146611	1.53335	0.125189	0.313359	not sig
ENSG00000131196	NFATC1	18	79397010	79397075	Fibroblast.47XYY-Fibroblast.46XY	66	5	-25.4649	Promoter (<=1kb)	Hypo	nuclear factor of activated T cells 1	ENSG00000131196.Promoter	Promoter	Fibroblast	no		546.934	-0.430614	0.141701	-3.03888	0.00237458	0.0159217	not sig
ENSG00000131196	NFATC1	18	79384961	79385037	Fibroblast.47XYY-Fibroblast.46XY	77	6	27.2843	Distal Intergenic	Hyper	nuclear factor of activated T cells 1	ENSG00000131196.Intergenic	Intergenic	Fibroblast	no		546.934	-0.430614	0.141701	-3.03888	0.00237458	0.0159217	not sig
ENSG00000131196	NFATC1	18	79399577	79399672	Fibroblast.47XYY-Fibroblast.46XY	96	19	-85.4415	Promoter (<=1kb)	Hypo	nuclear factor of activated T cells 1	ENSG00000131196.Promoter	Promoter	Fibroblast	no		546.934	-0.430614	0.141701	-3.03888	0.00237458	0.0159217	not sig
ENSG00000131196	NFATC1	18	79399295	79399415	Fibroblast.47XYY-Fibroblast.46XY	121	18	-79.9127	Promoter (<=1kb)	Hypo	nuclear factor of activated T cells 1	ENSG00000131196.Promoter	Promoter	Fibroblast	no		546.934	-0.430614	0.141701	-3.03888	0.00237458	0.0159217	not sig
ENSG00000131196	NFATC1	18	79439243	79439459	Fibroblast.47XYY-Fibroblast.46XY	217	30	-152.512	Intron (ENST00000253506/ENSG00000131196, intron 3 of 9)	Hypo	nuclear factor of activated T cells 1	ENSG00000131196.GeneBody	GeneBody	Fibroblast	no		546.934	-0.430614	0.141701	-3.03888	0.00237458	0.0159217	not sig
ENSG00000131323	TRAF3	14	102822726	102822803	Fibroblast.47XYY-Fibroblast.46XY	78	7	34.6069	Intron (ENST00000392745/ENSG00000131323, intron 1 of 11)	Hyper	TNF receptor associated factor 3	ENSG00000131323.GeneBody	GeneBody	Fibroblast	no		1438.17	0.0570439	0.121972	0.46768	0.640014	0.80899	not sig
ENSG00000131409	LRRC4B	19	50574813	50574952	Fibroblast.47XYY-Fibroblast.46XY	140	9	49.3261	Distal Intergenic	Hyper	leucine rich repeat containing 4B	ENSG00000131409.Intergenic	Intergenic	Fibroblast	no
ENSG00000131409	LRRC4B	19	50538357	50538524	Fibroblast.47XYY-Fibroblast.46XY	168	9	45.6489	Intron (ENST00000599957/ENSG00000131409, intron 2 of 2)	Hyper	leucine rich repeat containing 4B	ENSG00000131409.GeneBody	GeneBody	Fibroblast	no
ENSG00000131446	MGAT1	5	180803497	180803722	Fibroblast.47XYY-Fibroblast.46XY	226	17	83.1418	Promoter (<=1kb)	Hyper	alpha-1,3-mannosyl-glycoprotein 2-beta-N-acetylglucosaminyltransferase	ENSG00000131446.Promoter	Promoter	Fibroblast	no		7852.47	-0.21622	0.148373	-1.45727	0.145042	0.344827	not sig
ENSG00000131508	UBE2D2	5	139520907	139521038	Fibroblast.47XYY-Fibroblast.46XY	132	8	42.8895	Distal Intergenic	Hyper	ubiquitin conjugating enzyme E2 D2	ENSG00000131508.Intergenic	Intergenic	Fibroblast	no		3160.92	0.00493106	0.205375	0.0240101	0.980845	0.991202	not sig
ENSG00000131591	C1orf159	1	1120624	1120677	Fibroblast.47XYY-Fibroblast.46XY	54	4	18.3137	Distal Intergenic	Hyper	chromosome 1 open reading frame 159	ENSG00000131591.Intergenic	Intergenic	Fibroblast	no		283.592	0.0539318	0.175478	0.307342	0.758583	0.879576	not sig
ENSG00000131626	PPFIA1	11	70251834	70251962	Fibroblast.47XYY-Fibroblast.46XY	129	7	38.4656	Distal Intergenic	Hyper	PTPRF interacting protein alpha 1	ENSG00000131626.Intergenic	Intergenic	Fibroblast	no		2253.37	-0.13634	0.105101	-1.29723	0.194551	0.415763	not sig
ENSG00000131626	PPFIA1	11	70268194	70268329	Fibroblast.47XYY-Fibroblast.46XY	136	14	75.8695	Promoter (2-3kb)	Hyper	PTPRF interacting protein alpha 1	ENSG00000131626.Promoter	Promoter	Fibroblast	no		2253.37	-0.13634	0.105101	-1.29723	0.194551	0.415763	not sig
ENSG00000131653	TRAF7	16	2157549	2157628	Fibroblast.47XYY-Fibroblast.46XY	80	10	44.1702	Promoter (1-2kb)	Hyper	TNF receptor associated factor 7	ENSG00000131653.Promoter	Promoter	Fibroblast	no		3322.22	-0.202551	0.113946	-1.7776	0.0754692	0.224968	not sig
ENSG00000131668	BARX1	9	93938734	93938852	Fibroblast.47XYY-Fibroblast.46XY	119	4	19.9005	Distal Intergenic	Hyper	BARX homeobox 1	ENSG00000131668.Intergenic	Intergenic	Fibroblast	no
ENSG00000131668	BARX1	9	93922105	93922203	Fibroblast.47XYY-Fibroblast.46XY	99	9	40.8032	Distal Intergenic	Hyper	BARX homeobox 1	ENSG00000131668.Intergenic	Intergenic	Fibroblast	no
ENSG00000131669	NINJ1	9	93135918	93136077	Fibroblast.47XYY-Fibroblast.46XY	160	6	44.5221	Promoter (1-2kb)	Hyper	ninjurin 1	ENSG00000131669.Promoter	Promoter	Fibroblast	no		319.756	0.627069	0.16653	3.76551	0.000166209	0.00169074	up
ENSG00000131724	IL13RA1	X	118755161	118755240	Fibroblast.47XYY-Fibroblast.46XY	80	5	29.4798	Intron (ENST00000652600/ENSG00000131724, intron 5 of 11)	Hyper	interleukin 13 receptor subunit alpha 1	ENSG00000131724.GeneBody	GeneBody	Fibroblast	no	inactive	5433.27	-0.105498	0.117072	-0.901137	0.367516	0.606511	not sig
ENSG00000131738	KRT33B	17	41367530	41367628	Fibroblast.47XYY-Fibroblast.46XY	99	6	44.4871	Promoter (2-3kb)	Hyper	keratin 33B	ENSG00000131738.Promoter	Promoter	Fibroblast	no
ENSG00000131746	TNS4	17	40482669	40482780	Fibroblast.47XYY-Fibroblast.46XY	112	4	-20.1769	Promoter (1-2kb)	Hypo	tensin 4	ENSG00000131746.Promoter	Promoter	Fibroblast	no
ENSG00000131773	KHDRBS3	8	135665211	135665294	Fibroblast.47XYY-Fibroblast.46XY	84	4	24.6097	Distal Intergenic	Hyper	KH RNA binding domain containing, signal transduction associated 3	ENSG00000131773.Intergenic	Intergenic	Fibroblast	no		509.76	0.0322542	0.161223	0.200059	0.841434	0.921881	not sig
ENSG00000131899	LLGL1	17	18220829	18220924	Fibroblast.47XYY-Fibroblast.46XY	96	13	64.0465	Distal Intergenic	Hyper	LLGL scribble cell polarity complex component 1	ENSG00000131899.Intergenic	Intergenic	Fibroblast	no		2417.11	0.161528	0.141501	1.14153	0.253649	0.488689	not sig
ENSG00000132002	DNAJB1	19	14528768	14528868	Fibroblast.47XYY-Fibroblast.46XY	101	11	67.8479	Promoter (<=1kb)	Hyper	DnaJ heat shock protein family (Hsp40) member B1	ENSG00000132002.Promoter	Promoter	Fibroblast	no		3429.08	0.00673689	0.140699	0.0478815	0.961811	0.983276	not sig
ENSG00000132002	DNAJB1	19	14528588	14528709	Fibroblast.47XYY-Fibroblast.46XY	122	11	46.2796	Promoter (<=1kb)	Hyper	DnaJ heat shock protein family (Hsp40) member B1	ENSG00000132002.Promoter	Promoter	Fibroblast	no		3429.08	0.00673689	0.140699	0.0478815	0.961811	0.983276	not sig
ENSG00000132005	RFX1	19	14014883	14014953	Fibroblast.47XYY-Fibroblast.46XY	71	7	34.6621	Distal Intergenic	Hyper	regulatory factor X1	ENSG00000132005.Intergenic	Intergenic	Fibroblast	no		481.349	0.0930115	0.21342	0.435815	0.662971	0.823647	not sig
ENSG00000132005	RFX1	19	14004274	14005507	Fibroblast.47XYY-Fibroblast.46XY	1234	10	49.1195	Promoter (<=1kb)	Hyper	regulatory factor X1	ENSG00000132005.Promoter	Promoter	Fibroblast	no		481.349	0.0930115	0.21342	0.435815	0.662971	0.823647	not sig
ENSG00000132164	SLC6A11	3	10927176	10927300	Fibroblast.47XYY-Fibroblast.46XY	125	9	44.6984	Intron (ENST00000254488/ENSG00000132164, intron 9 of 13)	Hyper	solute carrier family 6 member 11	ENSG00000132164.GeneBody	GeneBody	Fibroblast	no
ENSG00000132256	TRIM5	11	5936984	5937102	Fibroblast.47XYY-Fibroblast.46XY	119	6	27.7175	Promoter (1-2kb)	Hyper	tripartite motif containing 5	ENSG00000132256.Promoter	Promoter	Fibroblast	no		1191.07	0.171653	0.185398	0.925863	0.354517	0.59338	not sig
ENSG00000132321	IQCA1	2	236301016	236301086	Fibroblast.47XYY-Fibroblast.46XY	71	5	29.4529	Distal Intergenic	Hyper	IQ motif containing with AAA domain 1	ENSG00000132321.Intergenic	Intergenic	Fibroblast	no		41.628	4.52906	0.787395	5.75196	8.82156e-09	2.56409e-07	up
ENSG00000132334	PTPRE	10	127991009	127991165	Fibroblast.47XYY-Fibroblast.46XY	157	10	51.7187	Intron (ENST00000254667/ENSG00000132334, intron 2 of 20)	Hyper	protein tyrosine phosphatase receptor type E	ENSG00000132334.GeneBody	GeneBody	Fibroblast	no		66.3487	0.117892	1.10575	0.106617	0.915093	0.958942	not sig
ENSG00000132359	RAP1GAP2	17	2875189	2875362	Fibroblast.47XYY-Fibroblast.46XY	174	10	49.9818	Intron (ENST00000637138/ENSG00000132359, intron 3 of 25)	Hyper	RAP1 GTPase activating protein 2	ENSG00000132359.GeneBody	GeneBody	Fibroblast	no		45.5602	1.84798	0.91579	2.01791	0.0436004	0.151318	not sig
ENSG00000132359	RAP1GAP2	17	2827943	2828062	Fibroblast.47XYY-Fibroblast.46XY	120	7	31.219	Intron (ENST00000637138/ENSG00000132359, intron 3 of 25)	Hyper	RAP1 GTPase activating protein 2	ENSG00000132359.GeneBody	GeneBody	Fibroblast	no		45.5602	1.84798	0.91579	2.01791	0.0436004	0.151318	not sig
ENSG00000132383	RPA1	17	1918855	1918987	Fibroblast.47XYY-Fibroblast.46XY	133	9	35.4886	Distal Intergenic	Hyper	replication protein A1	ENSG00000132383.Intergenic	Intergenic	Fibroblast	no		3109.32	-0.263079	0.195084	-1.34855	0.177482	0.393345	not sig
ENSG00000132589	FLOT2	17	28895421	28895558	Fibroblast.47XYY-Fibroblast.46XY	138	10	73.5403	Promoter (2-3kb)	Hyper	flotillin 2	ENSG00000132589.Promoter	Promoter	Fibroblast	no		1868.73	-0.0681604	0.161088	-0.423126	0.672203	0.828082	not sig
ENSG00000132640	BTBD3	20	12039945	12040005	Fibroblast.47XYY-Fibroblast.46XY	61	5	22.1118	Distal Intergenic	Hyper	BTB domain containing 3	ENSG00000132640.Intergenic	Intergenic	Fibroblast	no		1138.72	0.461159	0.0898391	5.13316	2.84913e-07	5.96421e-06	not sig
ENSG00000132680	KHDC4	1	155930843	155931049	Fibroblast.47XYY-Fibroblast.46XY	207	12	61.7637	Intron (ENST00000368320/ENSG00000132680, intron 2 of 12)	Hyper	KH domain containing 4, pre-mRNA splicing factor	ENSG00000132680.GeneBody	GeneBody	Fibroblast	no		1965.12	0.0907316	0.0838939	1.0815	0.279473	0.518259	not sig
ENSG00000132801	ZSWIM3	20	45864891	45864986	Fibroblast.47XYY-Fibroblast.46XY	96	8	42.9692	Intron (ENST00000255152/ENSG00000132801, intron 1 of 1)	Hyper	zinc finger SWIM-type containing 3	ENSG00000132801.GeneBody	GeneBody	Fibroblast	no		163.288	-0.0623139	0.21915	-0.284343	0.776147	0.889628	not sig
ENSG00000132854	KANK4	1	62327845	62327919	Fibroblast.47XYY-Fibroblast.46XY	75	6	-24.8095	Distal Intergenic	Hypo	KN motif and ankyrin repeat domains 4	ENSG00000132854.Intergenic	Intergenic	Fibroblast	no		29.8333	0.33088	0.748616	0.441989	0.658497	0.820884	not sig
ENSG00000132911	NMUR2	5	152455953	152456090	Fibroblast.47XYY-Fibroblast.46XY	138	4	19.0997	Intron (ENST00000663460/ENSG00000286749, intron 1 of 3)	Hyper	neuromedin U receptor 2	ENSG00000132911.GeneBody	GeneBody	Fibroblast	no
ENSG00000132932	ATP8A2	13	25429088	25429227	Fibroblast.47XYY-Fibroblast.46XY	140	12	58.1922	Intron (ENST00000381655/ENSG00000132932, intron 1 of 36)	Hyper	ATPase phospholipid transporting 8A2	ENSG00000132932.GeneBody	GeneBody	Fibroblast	no		41.8973	2.70097	0.671452	4.02258	5.75649e-05	0.000671709	up
ENSG00000132938	MTUS2	13	29012594	29012730	Fibroblast.47XYY-Fibroblast.46XY	137	15	94.9073	Intron (ENST00000612955/ENSG00000132938, intron 2 of 15)	Hyper	microtubule associated scaffold protein 2	ENSG00000132938.GeneBody	GeneBody	Fibroblast	no		57.5048	-1.39705	0.449683	-3.10674	0.0018916	0.0132062	down
ENSG00000132938	MTUS2	13	29121781	29121955	Fibroblast.47XYY-Fibroblast.46XY	175	8	41.7762	Intron (ENST00000612955/ENSG00000132938, intron 5 of 15)	Hyper	microtubule associated scaffold protein 2	ENSG00000132938.GeneBody	GeneBody	Fibroblast	no		57.5048	-1.39705	0.449683	-3.10674	0.0018916	0.0132062	down
ENSG00000132953	XPO4	13	20903516	20903652	Fibroblast.47XYY-Fibroblast.46XY	137	17	106.441	Promoter (<=1kb)	Hyper	exportin 4	ENSG00000132953.Promoter	Promoter	Fibroblast	no		1531.49	-0.338388	0.20791	-1.62758	0.103615	0.279032	not sig
ENSG00000133019	CHRM3	1	239476186	239476293	Fibroblast.47XYY-Fibroblast.46XY	108	12	50.8468	Intron (ENST00000468573/ENSG00000133019, intron 1 of 8)	Hyper	cholinergic receptor muscarinic 3	ENSG00000133019.GeneBody	GeneBody	Fibroblast	no		54.9263	3.07079	0.661016	4.64556	3.39159e-06	5.49687e-05	up
ENSG00000133019	CHRM3	1	239345454	239345612	Fibroblast.47XYY-Fibroblast.46XY	159	10	52.7414	Distal Intergenic	Hyper	cholinergic receptor muscarinic 3	ENSG00000133019.Intergenic	Intergenic	Fibroblast	no		54.9263	3.07079	0.661016	4.64556	3.39159e-06	5.49687e-05	up
ENSG00000133026	MYH10	17	8682051	8682113	Fibroblast.47XYY-Fibroblast.46XY	63	7	58.8005	Distal Intergenic	Hyper	myosin heavy chain 10	ENSG00000133026.Intergenic	Intergenic	Fibroblast	no		9089.19	0.331676	0.234206	1.41617	0.156725	0.3637	not sig
ENSG00000133026	MYH10	17	8671579	8671704	Fibroblast.47XYY-Fibroblast.46XY	126	6	24.3357	Distal Intergenic	Hyper	myosin heavy chain 10	ENSG00000133026.Intergenic	Intergenic	Fibroblast	no		9089.19	0.331676	0.234206	1.41617	0.156725	0.3637	not sig
ENSG00000133030	MPRIP	17	17167504	17167610	Fibroblast.47XYY-Fibroblast.46XY	107	4	27.5833	Promoter (1-2kb)	Hyper	myosin phosphatase Rho interacting protein	ENSG00000133030.Promoter	Promoter	Fibroblast	no		16375.8	-0.515243	0.175038	-2.9436	0.00324419	0.0203962	not sig
ENSG00000133056	PIK3C2B	1	204465430	204465642	Fibroblast.47XYY-Fibroblast.46XY	213	8	49.7188	Promoter (1-2kb)	Hyper	phosphatidylinositol-4-phosphate 3-kinase catalytic subunit type 2 beta	ENSG00000133056.Promoter	Promoter	Fibroblast	no		148.993	0.959109	0.361261	2.6549	0.00793331	0.0416168	up
ENSG00000133065	SLC41A1	1	205800428	205800531	Fibroblast.47XYY-Fibroblast.46XY	104	6	-30.3962	Promoter (<=1kb)	Hypo	solute carrier family 41 member 1	ENSG00000133065.Promoter	Promoter	Fibroblast	no		2606.22	0.0244795	0.0828031	0.295635	0.767509	0.88493	not sig
ENSG00000133083	DCLK1	13	36154854	36154973	Fibroblast.47XYY-Fibroblast.46XY	120	18	-70.3314	Distal Intergenic	Hypo	doublecortin like kinase 1	ENSG00000133083.Intergenic	Intergenic	Fibroblast	no		164.957	1.20898	0.354488	3.4105	0.000648428	0.00543853	up
ENSG00000133243	BTBD2	19	2022894	2023003	Fibroblast.47XYY-Fibroblast.46XY	110	7	40.4828	Intron (ENST00000590646/ENSG00000133243, intron 2 of 4)	Hyper	BTB domain containing 2	ENSG00000133243.GeneBody	GeneBody	Fibroblast	no		3002.34	-0.0883813	0.162115	-0.545177	0.585631	0.774025	not sig
ENSG00000133247	KMT5C	19	55344634	55344761	Fibroblast.47XYY-Fibroblast.46XY	128	8	-42.1112	Promoter (1-2kb)	Hypo	lysine methyltransferase 5C	ENSG00000133247.Promoter	Promoter	Fibroblast	no		211.424	-0.108062	0.198981	-0.543078	0.587076	0.775082	not sig
ENSG00000133250	ZNF414	19	8513171	8513254	Fibroblast.47XYY-Fibroblast.46XY	84	7	33.1134	Promoter (<=1kb)	Hyper	zinc finger protein 414	ENSG00000133250.Promoter	Promoter	Fibroblast	no		381.468	-0.137536	0.16635	-0.826788	0.408357	0.642812	not sig
ENSG00000133318	RTN3	11	63686208	63686266	Fibroblast.47XYY-Fibroblast.46XY	59	5	26.525	Intron (ENST00000341307/ENSG00000133318, intron 1 of 5)	Hyper	reticulon 3	ENSG00000133318.GeneBody	GeneBody	Fibroblast	no		6101.1	-0.0419204	0.127124	-0.32976	0.741581	0.868598	not sig
ENSG00000133393	CEP20	16	15901873	15901923	Fibroblast.47XYY-Fibroblast.46XY	51	5	25.1518	Distal Intergenic	Hyper	centrosomal protein 20	ENSG00000133393.Intergenic	Intergenic	Fibroblast	no		1244.68	-0.213264	0.218163	-0.977544	0.3283	0.568276	not sig
ENSG00000133627	ACTR3B	7	152759043	152759174	Fibroblast.47XYY-Fibroblast.46XY	132	8	46.7394	Promoter (<=1kb)	Hyper	actin related protein 3B	ENSG00000133627.Promoter	Promoter	Fibroblast	no		249.252	0.381166	0.224431	1.69836	0.0894393	0.252113	not sig
ENSG00000133706	LARS1	5	146184270	146184341	Fibroblast.47XYY-Fibroblast.46XY	72	5	23.3582	Promoter (1-2kb)	Hyper	leucyl-tRNA synthetase 1	ENSG00000133706.Promoter	Promoter	Fibroblast	no		6721.68	-0.236948	0.179176	-1.32244	0.186023	0.40474	not sig
ENSG00000133805	AMPD3	11	10415090	10415261	Fibroblast.47XYY-Fibroblast.46XY	172	16	105.548	Intron (ENST00000532250/ENSG00000133805, intron 2 of 3)	Hyper	adenosine monophosphate deaminase 3	ENSG00000133805.GeneBody	GeneBody	Fibroblast	no		481.68	0.703266	0.170237	4.1311	3.61027e-05	0.000445682	up
ENSG00000133874	RNF122	8	33565817	33566014	Fibroblast.47XYY-Fibroblast.46XY	198	20	94.4944	Promoter (1-2kb)	Hyper	ring finger protein 122	ENSG00000133874.Promoter	Promoter	Fibroblast	no		150.392	0.664131	0.23076	2.87802	0.0040018	0.024071	up
ENSG00000133943	DGLUCY	14	91220023	91220183	Fibroblast.47XYY-Fibroblast.46XY	161	6	36.0154	Intron (ENST00000520328/ENSG00000133943, intron 14 of 14)	Hyper	D-glutamate cyclase	ENSG00000133943.GeneBody	GeneBody	Fibroblast	no		905.242	-0.0147317	0.183226	-0.0804017	0.935918	0.97008	not sig
ENSG00000133958	UNC79	14	93736513	93736569	Fibroblast.47XYY-Fibroblast.46XY	57	5	22.4429	Intron (ENST00000393143/ENSG00000175785, intron 3 of 3)	Hyper	unc-79 homolog, NALCN channel complex subunit	ENSG00000133958.GeneBody	GeneBody	Fibroblast	no
ENSG00000133961	NUMB	14	73280853	73280989	Fibroblast.47XYY-Fibroblast.46XY	137	11	51.4747	Intron (ENST00000554546/ENSG00000133961, intron 10 of 10)	Hyper	NUMB endocytic adaptor protein	ENSG00000133961.GeneBody	GeneBody	Fibroblast	no		3896.74	-0.100316	0.127223	-0.78851	0.430398	0.661313	not sig
ENSG00000134013	LOXL2	8	23370661	23370749	Fibroblast.47XYY-Fibroblast.46XY	89	6	-29.6364	Promoter (<=1kb)	Hypo	lysyl oxidase like 2	ENSG00000134013.Promoter	Promoter	Fibroblast	no		46892.9	0.179829	0.21687	0.8292	0.406991	0.642483	not sig
ENSG00000134313	KIDINS220	2	8714121	8714492	Fibroblast.47XYY-Fibroblast.46XY	372	12	74.346	Distal Intergenic	Hyper	kinase D interacting substrate 220	ENSG00000134313.Intergenic	Intergenic	Fibroblast	no		5939.25	-0.329051	0.101525	-3.24109	0.00119072	0.00901848	not sig
ENSG00000134321	RSAD2	2	6883417	6883485	Fibroblast.47XYY-Fibroblast.46XY	69	6	25.1453	Exon (ENST00000442639/ENSG00000134321, exon 2 of 3)	Hyper	radical S-adenosyl methionine domain containing 2	ENSG00000134321.GeneBody	GeneBody	Fibroblast	no		12.2845	6.66547	1.48243	4.49632	6.91407e-06	0.000104202	up
ENSG00000134363	FST	5	53485070	53485214	Fibroblast.47XYY-Fibroblast.46XY	145	6	32.9186	Promoter (<=1kb)	Hyper	follistatin	ENSG00000134363.Promoter	Promoter	Fibroblast	no		4011.2	-0.830592	0.179741	-4.62105	3.81802e-06	6.12785e-05	down
ENSG00000134369	NAV1	1	201740592	201740732	Fibroblast.47XYY-Fibroblast.46XY	141	16	62.3875	Promoter (<=1kb)	Hyper	neuron navigator 1	ENSG00000134369.Promoter	Promoter	Fibroblast	no		16753.4	0.361312	0.134832	2.67972	0.00736835	0.0392138	not sig
ENSG00000134398	ERN2	16	23713452	23713580	Fibroblast.47XYY-Fibroblast.46XY	129	12	91.5721	Promoter (<=1kb)	Hyper	endoplasmic reticulum to nucleus signaling 2	ENSG00000134398.Promoter	Promoter	Fibroblast	no
ENSG00000134460	IL2RA	10	6050736	6050791	Fibroblast.47XYY-Fibroblast.46XY	56	5	24.5075	Intron (ENST00000379959/ENSG00000134460, intron 1 of 7)	Hyper	interleukin 2 receptor subunit alpha	ENSG00000134460.GeneBody	GeneBody	Fibroblast	no
ENSG00000134470	IL15RA	10	5984525	5984659	Fibroblast.47XYY-Fibroblast.46XY	135	8	38.7803	Distal Intergenic	Hyper	interleukin 15 receptor subunit alpha	ENSG00000134470.Intergenic	Intergenic	Fibroblast	no		77.4168	-0.351496	0.289408	-1.21453	0.224545	0.454764	not sig
ENSG00000134489	HRH4	18	24472137	24472201	Fibroblast.47XYY-Fibroblast.46XY	65	8	38.4903	Intron (ENST00000256906/ENSG00000134489, intron 2 of 2)	Hyper	histamine receptor H4	ENSG00000134489.GeneBody	GeneBody	Fibroblast	no
ENSG00000134668	SPOCD1	1	31802735	31802916	Fibroblast.47XYY-Fibroblast.46XY	182	10	51.4683	Promoter (2-3kb)	Hyper	SPOC domain containing 1	ENSG00000134668.Promoter	Promoter	Fibroblast	no		6556.14	0.351724	0.261943	1.34275	0.179352	0.39609	not sig
ENSG00000134716	CYP2J2	1	59901025	59901180	Fibroblast.47XYY-Fibroblast.46XY	156	6	29.7873	3' UTR	Hyper	cytochrome P450 family 2 subfamily J member 2	ENSG00000134716.GeneBody	GeneBody	Fibroblast	no
ENSG00000134760	DSG1	18	31267070	31267176	Fibroblast.47XYY-Fibroblast.46XY	107	15	79.5178	Distal Intergenic	Hyper	desmoglein 1	ENSG00000134760.Intergenic	Intergenic	Fibroblast	no
ENSG00000134815	DHX34	19	47379727	47379847	Fibroblast.47XYY-Fibroblast.46XY	121	15	67.4711	3' UTR	Hyper	DExH-box helicase 34	ENSG00000134815.GeneBody	GeneBody	Fibroblast	no		728.685	-0.387521	0.137771	-2.81279	0.00491143	0.0285339	not sig
ENSG00000134825	TMEM258	11	61790787	61790902	Fibroblast.47XYY-Fibroblast.46XY	116	8	37.8318	Promoter (<=1kb)	Hyper	transmembrane protein 258	ENSG00000134825.Promoter	Promoter	Fibroblast	no		1233.99	0.0506258	0.211879	0.238937	0.811154	0.905158	not sig
ENSG00000134873	CLDN10	13	95479071	95479205	Fibroblast.47XYY-Fibroblast.46XY	135	8	40.8273	Intron (ENST00000376873/ENSG00000134873, intron 1 of 4)	Hyper	claudin 10	ENSG00000134873.GeneBody	GeneBody	Fibroblast	no
ENSG00000134905	CARS2	13	110704444	110704580	Fibroblast.47XYY-Fibroblast.46XY	137	6	31.1506	Promoter (1-2kb)	Hyper	cysteinyl-tRNA synthetase 2, mitochondrial	ENSG00000134905.Promoter	Promoter	Fibroblast	no		2929.57	-0.358295	0.214494	-1.67042	0.0948363	0.262091	not sig
ENSG00000134996	OSTF1	9	75108788	75108961	Fibroblast.47XYY-Fibroblast.46XY	174	5	28.6486	Intron (ENST00000346234/ENSG00000134996, intron 1 of 9)	Hyper	osteoclast stimulating factor 1	ENSG00000134996.GeneBody	GeneBody	Fibroblast	no		1498	-0.296785	0.118688	-2.50055	0.0124001	0.0588548	not sig
ENSG00000135002	RFK	9	76393394	76393458	Fibroblast.47XYY-Fibroblast.46XY	65	10	47.8416	Promoter (<=1kb)	Hyper	riboflavin kinase	ENSG00000135002.Promoter	Promoter	Fibroblast	no		764.261	-0.472046	0.152509	-3.0952	0.00196677	0.0136159	not sig
ENSG00000135100	HNF1A	12	120978738	120978866	Fibroblast.47XYY-Fibroblast.46XY	129	13	82.5175	Promoter (<=1kb)	Hyper	HNF1 homeobox A	ENSG00000135100.Promoter	Promoter	Fibroblast	no
ENSG00000135111	TBX3	12	114671708	114671915	Fibroblast.47XYY-Fibroblast.46XY	208	33	-178.825	3' UTR	Hypo	T-box transcription factor 3	ENSG00000135111.GeneBody	GeneBody	Fibroblast	no		5599.74	1.69324	0.49512	3.41986	0.000626537	0.0052949	up
ENSG00000135144	DTX1	12	113070372	113070436	Fibroblast.47XYY-Fibroblast.46XY	65	7	47.0876	Intron (ENST00000257600/ENSG00000135144, intron 1 of 8)	Hyper	deltex E3 ubiquitin ligase 1	ENSG00000135144.GeneBody	GeneBody	Fibroblast	no
ENSG00000135372	NAT10	11	34155431	34155546	Fibroblast.47XYY-Fibroblast.46XY	116	4	21.7159	Intron (ENST00000435224/ENSG00000166016, intron 14 of 16)	Hyper	N-acetyltransferase 10	ENSG00000135372.GeneBody	GeneBody	Fibroblast	no		1901	-0.191343	0.155086	-1.23379	0.217282	0.445474	not sig
ENSG00000135502	SLC26A10P	12	57619389	57619441	Fibroblast.47XYY-Fibroblast.46XY	53	10	-52.8683	Promoter (<=1kb)	Hypo	solute carrier family 26 member 10, pseudogene	ENSG00000135502.Promoter	Promoter	Fibroblast	no
ENSG00000135631	RAB11FIP5	2	73175396	73175528	Fibroblast.47XYY-Fibroblast.46XY	133	14	-59.9536	Distal Intergenic	Hypo	RAB11 family interacting protein 5	ENSG00000135631.Intergenic	Intergenic	Fibroblast	no		6343.08	-0.146301	0.12156	-1.20353	0.228771	0.460155	not sig
ENSG00000135686	KLHL36	16	84678531	84678645	Fibroblast.47XYY-Fibroblast.46XY	115	12	84.8455	Distal Intergenic	Hyper	kelch like family member 36	ENSG00000135686.Intergenic	Intergenic	Fibroblast	no		2183.68	-0.0891218	0.160329	-0.555869	0.578301	0.769107	not sig
ENSG00000135697	BCO1	16	81239058	81239177	Fibroblast.47XYY-Fibroblast.46XY	120	8	48.7517	Promoter (<=1kb)	Hyper	beta-carotene oxygenase 1	ENSG00000135697.Promoter	Promoter	Fibroblast	no
ENSG00000135702	CHST5	16	75529693	75529834	Fibroblast.47XYY-Fibroblast.46XY	142	16	82.3942	3' UTR	Hyper	carbohydrate sulfotransferase 5	ENSG00000135702.GeneBody	GeneBody	Fibroblast	no
ENSG00000135709	KIAA0513	16	85089780	85089948	Fibroblast.47XYY-Fibroblast.46XY	169	8	-41.556	Promoter (2-3kb)	Hypo	KIAA0513	ENSG00000135709.Promoter	Promoter	Fibroblast	no		729.049	-0.283442	0.127743	-2.21883	0.026498	0.104606	not sig
ENSG00000135749	PCNX2	1	233007697	233007836	Fibroblast.47XYY-Fibroblast.46XY	140	4	24.1082	Intron (ENST00000258229/ENSG00000135749, intron 28 of 33)	Hyper	pecanex 2	ENSG00000135749.GeneBody	GeneBody	Fibroblast	no		990.343	-0.425219	0.143949	-2.95397	0.00313719	0.019894	not sig
ENSG00000135773	CAPN9	1	230742556	230742610	Fibroblast.47XYY-Fibroblast.46XY	55	5	31.4332	Intron (ENST00000412344/ENSG00000244137, intron 1 of 1)	Hyper	calpain 9	ENSG00000135773.GeneBody	GeneBody	Fibroblast	no
ENSG00000135835	KIAA1614	1	180940871	180941004	Fibroblast.47XYY-Fibroblast.46XY	134	5	29.435	Promoter (<=1kb)	Hyper	KIAA1614	ENSG00000135835.Promoter	Promoter	Fibroblast	no		522.674	-0.0792175	0.203657	-0.388976	0.697294	0.843149	not sig
ENSG00000135903	PAX3	2	222291038	222291147	Fibroblast.47XYY-Fibroblast.46XY	110	26	-175.313	Intron (ENST00000392070/ENSG00000135903, intron 4 of 8)	Hypo	paired box 3	ENSG00000135903.GeneBody	GeneBody	Fibroblast	no		162.826	-0.0384477	0.527558	-0.0728786	0.941903	0.972512	not sig
ENSG00000135925	WNT10A	2	218873700	218873850	Fibroblast.47XYY-Fibroblast.46XY	151	29	134.815	3' UTR	Hyper	Wnt family member 10A	ENSG00000135925.GeneBody	GeneBody	Fibroblast	no
ENSG00000135960	EDAR	2	108975283	108975525	Fibroblast.47XYY-Fibroblast.46XY	243	16	74.4821	Intron (ENST00000258443/ENSG00000135960, intron 1 of 11)	Hyper	ectodysplasin A receptor	ENSG00000135960.GeneBody	GeneBody	Fibroblast	no
ENSG00000135960	EDAR	2	109021937	109022096	Fibroblast.47XYY-Fibroblast.46XY	160	8	45.2305	Distal Intergenic	Hyper	ectodysplasin A receptor	ENSG00000135960.Intergenic	Intergenic	Fibroblast	no
ENSG00000136002	ARHGEF4	2	130916000	130916144	Fibroblast.47XYY-Fibroblast.46XY	145	15	84.8143	Promoter (<=1kb)	Hyper	Rho guanine nucleotide exchange factor 4	ENSG00000136002.Promoter	Promoter	Fibroblast	no		262.936	-0.512594	0.213435	-2.40164	0.0163219	0.0725666	not sig
ENSG00000136002	ARHGEF4	2	131039739	131039856	Fibroblast.47XYY-Fibroblast.46XY	118	23	-89.8633	Promoter (<=1kb)	Hypo	Rho guanine nucleotide exchange factor 4	ENSG00000136002.Promoter	Promoter	Fibroblast	no		262.936	-0.512594	0.213435	-2.40164	0.0163219	0.0725666	not sig
ENSG00000136099	PCDH8	13	52901206	52901301	Fibroblast.47XYY-Fibroblast.46XY	96	10	56.2707	Distal Intergenic	Hyper	protocadherin 8	ENSG00000136099.Intergenic	Intergenic	Fibroblast	no
ENSG00000136099	PCDH8	13	52901599	52901660	Fibroblast.47XYY-Fibroblast.46XY	62	9	40.6964	Distal Intergenic	Hyper	protocadherin 8	ENSG00000136099.Intergenic	Intergenic	Fibroblast	no
ENSG00000136231	IGF2BP3	7	23433795	23433895	Fibroblast.47XYY-Fibroblast.46XY	101	7	32.6342	Promoter (2-3kb)	Hyper	insulin like growth factor 2 mRNA binding protein 3	ENSG00000136231.Promoter	Promoter	Fibroblast	no		1051.14	1.12008	0.296218	3.78128	0.000156024	0.00160134	up
ENSG00000136250	AOAH	7	36508608	36508767	Fibroblast.47XYY-Fibroblast.46XY	160	8	52.9572	Distal Intergenic	Hyper	acyloxyacyl hydrolase	ENSG00000136250.Intergenic	Intergenic	Fibroblast	no
ENSG00000136297	MMD2	7	4940763	4940933	Fibroblast.47XYY-Fibroblast.46XY	171	17	72.4982	Intron (ENST00000406755/ENSG00000136297, intron 1 of 7)	Hyper	monocyte to macrophage differentiation associated 2	ENSG00000136297.GeneBody	GeneBody	Fibroblast	no
ENSG00000136378	ADAMTS7	15	78759718	78759789	Fibroblast.47XYY-Fibroblast.46XY	72	5	23.3462	Intron (ENST00000388820/ENSG00000136378, intron 23 of 23)	Hyper	ADAM metallopeptidase with thrombospondin type 1 motif 7	ENSG00000136378.GeneBody	GeneBody	Fibroblast	no		2198.81	-0.903198	0.348922	-2.58854	0.00963843	0.0485191	down
ENSG00000136378	ADAMTS7	15	78762876	78762957	Fibroblast.47XYY-Fibroblast.46XY	82	5	25.1055	Promoter (2-3kb)	Hyper	ADAM metallopeptidase with thrombospondin type 1 motif 7	ENSG00000136378.Promoter	Promoter	Fibroblast	no		2198.81	-0.903198	0.348922	-2.58854	0.00963843	0.0485191	down
ENSG00000136381	IREB2	15	78410118	78410253	Fibroblast.47XYY-Fibroblast.46XY	136	10	49.9568	Distal Intergenic	Hyper	iron responsive element binding protein 2	ENSG00000136381.Intergenic	Intergenic	Fibroblast	no		3070.25	0.149088	0.173128	0.861141	0.38916	0.626227	not sig
ENSG00000136425	CIB2	15	78130858	78130938	Fibroblast.47XYY-Fibroblast.46XY	81	12	-65.1727	Promoter (<=1kb)	Hypo	calcium and integrin binding family member 2	ENSG00000136425.Promoter	Promoter	Fibroblast	no		214.677	0.956523	0.216701	4.41403	1.01466e-05	0.000145207	up
ENSG00000136574	GATA4	8	11710842	11710895	Fibroblast.47XYY-Fibroblast.46XY	54	10	-45.2416	Promoter (2-3kb)	Hypo	GATA binding protein 4	ENSG00000136574.Promoter	Promoter	Fibroblast	no
ENSG00000136574	GATA4	8	11740120	11740219	Fibroblast.47XYY-Fibroblast.46XY	100	6	26.5451	Intron (ENST00000528712/ENSG00000136574, intron 2 of 6)	Hyper	GATA binding protein 4	ENSG00000136574.GeneBody	GeneBody	Fibroblast	no
ENSG00000136630	HLX	1	220878752	220878821	Fibroblast.47XYY-Fibroblast.46XY	70	8	-30.5582	Promoter (<=1kb)	Hypo	H2.0 like homeobox	ENSG00000136630.Promoter	Promoter	Fibroblast	no		104.744	1.12201	0.289275	3.8787	0.000105015	0.00114074	up
ENSG00000136802	LRRC8A	9	128904705	128904853	Fibroblast.47XYY-Fibroblast.46XY	149	13	61.8357	Intron (ENST00000372600/ENSG00000136802, intron 2 of 3)	Hyper	leucine rich repeat containing 8 VRAC subunit A	ENSG00000136802.GeneBody	GeneBody	Fibroblast	no		4647.64	-0.154667	0.243638	-0.634824	0.525543	0.734049	not sig
ENSG00000136828	RALGPS1	9	126922912	126927383	Fibroblast.47XYY-Fibroblast.46XY	4472	7	7.74525	Intron (ENST00000424082/ENSG00000136828, intron 1 of 17)	Hyper	Ral GEF with PH domain and SH3 binding motif 1	ENSG00000136828.GeneBody	GeneBody	Fibroblast	no		97.3941	0.142368	0.219165	0.649596	0.515953	0.727113	not sig
ENSG00000136830	NIBAN2	9	127537291	127537458	Fibroblast.47XYY-Fibroblast.46XY	168	6	-41.9451	Intron (ENST00000373314/ENSG00000136830, intron 1 of 13)	Hypo	niban apoptosis regulator 2	ENSG00000136830.GeneBody	GeneBody	Fibroblast	no		20923.6	-0.0953602	0.126898	-0.751468	0.452371	0.678006	not sig
ENSG00000136848	DAB2IP	9	121701014	121701150	Fibroblast.47XYY-Fibroblast.46XY	137	18	-94.2609	Promoter (1-2kb)	Hypo	DAB2 interacting protein	ENSG00000136848.Promoter	Promoter	Fibroblast	no		2407.04	-0.77044	0.213476	-3.60903	0.000307342	0.00287513	down
ENSG00000136848	DAB2IP	9	121786326	121786436	Fibroblast.47XYY-Fibroblast.46XY	111	4	18.075	Distal Intergenic	Hyper	DAB2 interacting protein	ENSG00000136848.Intergenic	Intergenic	Fibroblast	no		2407.04	-0.77044	0.213476	-3.60903	0.000307342	0.00287513	down
ENSG00000136859	ANGPTL2	9	127116363	127116486	Fibroblast.47XYY-Fibroblast.46XY	124	5	34.8975	Intron (ENST00000424082/ENSG00000136828, intron 8 of 17)	Hyper	angiopoietin like 2	ENSG00000136859.GeneBody	GeneBody	Fibroblast	no		3873.47	0.341135	0.209924	1.62504	0.104154	0.280027	not sig
ENSG00000136928	GABBR2	9	98333480	98333613	Fibroblast.47XYY-Fibroblast.46XY	134	6	35.3683	Intron (ENST00000259455/ENSG00000136928, intron 13 of 18)	Hyper	gamma-aminobutyric acid type B receptor subunit 2	ENSG00000136928.GeneBody	GeneBody	Fibroblast	no		684.068	0.778681	0.410023	1.89912	0.0575493	0.185339	not sig
ENSG00000136928	GABBR2	9	98575898	98576028	Fibroblast.47XYY-Fibroblast.46XY	131	6	43.2702	Intron (ENST00000259455/ENSG00000136928, intron 2 of 18)	Hyper	gamma-aminobutyric acid type B receptor subunit 2	ENSG00000136928.GeneBody	GeneBody	Fibroblast	no		684.068	0.778681	0.410023	1.89912	0.0575493	0.185339	not sig
ENSG00000136930	PSMB7	9	124392338	124392448	Fibroblast.47XYY-Fibroblast.46XY	111	8	47.9636	Intron (ENST00000259457/ENSG00000136930, intron 5 of 7)	Hyper	proteasome 20S subunit beta 7	ENSG00000136930.GeneBody	GeneBody	Fibroblast	no		3923.59	0.0413598	0.147301	0.280784	0.778876	0.891214	not sig
ENSG00000136944	LMX1B	9	126625251	126625603	Fibroblast.47XYY-Fibroblast.46XY	353	36	-212.43	Intron (ENST00000355497/ENSG00000136944, intron 2 of 7)	Hypo	LIM homeobox transcription factor 1 beta	ENSG00000136944.GeneBody	GeneBody	Fibroblast	no
ENSG00000136944	LMX1B	9	126623918	126624845	Fibroblast.47XYY-Fibroblast.46XY	928	44	-209.184	Intron (ENST00000355497/ENSG00000136944, intron 2 of 7)	Hypo	LIM homeobox transcription factor 1 beta	ENSG00000136944.GeneBody	GeneBody	Fibroblast	no
ENSG00000136944	LMX1B	9	126625697	126626568	Fibroblast.47XYY-Fibroblast.46XY	872	108	-691.528	Intron (ENST00000355497/ENSG00000136944, intron 2 of 7)	Hypo	LIM homeobox transcription factor 1 beta	ENSG00000136944.GeneBody	GeneBody	Fibroblast	no
ENSG00000137078	SIT1	9	35649723	35650018	Fibroblast.47XYY-Fibroblast.46XY	296	22	119.051	Promoter (<=1kb)	Hyper	signaling threshold regulating transmembrane adaptor 1	ENSG00000137078.Promoter	Promoter	Fibroblast	no
ENSG00000137094	DNAJB5	9	34990687	34990943	Fibroblast.47XYY-Fibroblast.46XY	257	19	113.826	Promoter (<=1kb)	Hyper	DnaJ heat shock protein family (Hsp40) member B5	ENSG00000137094.Promoter	Promoter	Fibroblast	no		1172.22	-0.298807	0.0888538	-3.36291	0.000771262	0.00628476	not sig
ENSG00000137106	GRHPR	9	37412816	37412919	Fibroblast.47XYY-Fibroblast.46XY	104	6	32.1701	Distal Intergenic	Hyper	glyoxylate and hydroxypyruvate reductase	ENSG00000137106.Intergenic	Intergenic	Fibroblast	no		2898.42	-0.0407688	0.0888789	-0.4587	0.646449	0.813621	not sig
ENSG00000137274	BPHL	6	3127912	3128030	Fibroblast.47XYY-Fibroblast.46XY	119	6	31.5587	Promoter (1-2kb)	Hyper	biphenyl hydrolase like	ENSG00000137274.Promoter	Promoter	Fibroblast	no		404.313	-0.157177	0.174095	-0.902824	0.366619	0.605865	not sig
ENSG00000137409	MTCH1	6	36970596	36970672	Fibroblast.47XYY-Fibroblast.46XY	77	8	35.3681	Promoter (<=1kb)	Hyper	mitochondrial carrier 1	ENSG00000137409.Promoter	Promoter	Fibroblast	no		10518.7	-0.0214598	0.206021	-0.104163	0.91704	0.959992	not sig
ENSG00000137486	ARRB1	11	75311825	75312074	Fibroblast.47XYY-Fibroblast.46XY	250	9	46.2571	Promoter (<=1kb)	Hyper	arrestin beta 1	ENSG00000137486.Promoter	Promoter	Fibroblast	no		221.032	0.153759	0.179824	0.855053	0.392522	0.629803	not sig
ENSG00000137601	NEK1	4	169439938	169440044	Fibroblast.47XYY-Fibroblast.46XY	107	7	33.7208	Intron (ENST00000507142/ENSG00000137601, intron 27 of 35)	Hyper	NIMA related kinase 1	ENSG00000137601.GeneBody	GeneBody	Fibroblast	no		1316.97	-0.28054	0.175113	-1.60205	0.109145	0.288512	not sig
ENSG00000137714	FDX1	11	110439427	110439502	Fibroblast.47XYY-Fibroblast.46XY	76	5	24.2307	Intron (ENST00000260270/ENSG00000137714, intron 2 of 3)	Hyper	ferredoxin 1	ENSG00000137714.GeneBody	GeneBody	Fibroblast	no		693.503	-0.428476	0.119554	-3.58395	0.000338437	0.0031131	not sig
ENSG00000137727	ARHGAP20	11	110518594	110518740	Fibroblast.47XYY-Fibroblast.46XY	147	10	52.3578	Distal Intergenic	Hyper	Rho GTPase activating protein 20	ENSG00000137727.Intergenic	Intergenic	Fibroblast	no		74.3287	-1.81217	0.22881	-7.92	2.37517e-15	1.99832e-13	down
ENSG00000137767	SQOR	15	45622724	45622789	Fibroblast.47XYY-Fibroblast.46XY	66	9	37.8361	Intron (ENST00000564080/ENSG00000260170, intron 1 of 5)	Hyper	sulfide quinone oxidoreductase	ENSG00000137767.GeneBody	GeneBody	Fibroblast	no		292.482	-0.344513	0.192966	-1.78535	0.074204	0.222107	not sig
ENSG00000137825	ITPKA	15	41501206	41501301	Fibroblast.47XYY-Fibroblast.46XY	96	9	-46.5141	Promoter (<=1kb)	Hypo	inositol-trisphosphate 3-kinase A	ENSG00000137825.Promoter	Promoter	Fibroblast	no
ENSG00000137877	SPTBN5	15	41849886	41849991	Fibroblast.47XYY-Fibroblast.46XY	106	4	26.7019	Promoter (<=1kb)	Hyper	spectrin beta, non-erythrocytic 5	ENSG00000137877.Promoter	Promoter	Fibroblast	no		115.889	-1.49075	0.347786	-4.2864	1.81589e-05	0.000244009	down
ENSG00000138032	PPM1B	2	44173663	44173800	Fibroblast.47XYY-Fibroblast.46XY	138	6	34.6548	Intron (ENST00000419807/ENSG00000138032, intron 2 of 5)	Hyper	protein phosphatase, Mg2+/Mn2+ dependent 1B	ENSG00000138032.GeneBody	GeneBody	Fibroblast	no		434.986	-0.00296917	0.163147	-0.0181993	0.98548	0.992619	not sig
ENSG00000138100	TRIM54	2	27303952	27304068	Fibroblast.47XYY-Fibroblast.46XY	117	6	37.0327	Promoter (<=1kb)	Hyper	tripartite motif containing 54	ENSG00000138100.Promoter	Promoter	Fibroblast	no
ENSG00000138101	DTNB	2	25616714	25616788	Fibroblast.47XYY-Fibroblast.46XY	75	6	27.383	Intron (ENST00000496972/ENSG00000138101, intron 3 of 17)	Hyper	dystrobrevin beta	ENSG00000138101.GeneBody	GeneBody	Fibroblast	no		103.218	-0.0835438	0.34245	-0.243959	0.807263	0.903732	not sig
ENSG00000138119	MYOF	10	93463559	93463695	Fibroblast.47XYY-Fibroblast.46XY	137	8	50.8061	Intron (ENST00000359263/ENSG00000138119, intron 1 of 53)	Hyper	myoferlin	ENSG00000138119.GeneBody	GeneBody	Fibroblast	no		48063.9	-0.518517	0.117185	-4.42476	9.6551e-06	0.00013923	not sig
ENSG00000138135	CH25H	10	89208160	89208517	Fibroblast.47XYY-Fibroblast.46XY	358	31	-163.522	Promoter (<=1kb)	Hypo	cholesterol 25-hydroxylase	ENSG00000138135.Promoter	Promoter	Fibroblast	no		438.649	1.79289	0.627006	2.85945	0.00424376	0.0253532	up
ENSG00000138160	KIF11	10	92592358	92592435	Fibroblast.47XYY-Fibroblast.46XY	78	13	64.2295	Promoter (<=1kb)	Hyper	kinesin family member 11	ENSG00000138160.Promoter	Promoter	Fibroblast	no		2130.64	-0.320243	0.262593	-1.21954	0.222639	0.452215	not sig
ENSG00000138160	KIF11	10	92592494	92592692	Fibroblast.47XYY-Fibroblast.46XY	199	12	64.9413	Promoter (<=1kb)	Hyper	kinesin family member 11	ENSG00000138160.Promoter	Promoter	Fibroblast	no		2130.64	-0.320243	0.262593	-1.21954	0.222639	0.452215	not sig
ENSG00000138162	TACC2	10	122047015	122047145	Fibroblast.47XYY-Fibroblast.46XY	131	8	40.3347	Intron (ENST00000369005/ENSG00000138162, intron 2 of 22)	Hyper	transforming acidic coiled-coil containing protein 2	ENSG00000138162.GeneBody	GeneBody	Fibroblast	no		573.943	0.170443	0.191344	0.890768	0.373054	0.611069	not sig
ENSG00000138411	HECW2	2	196608195	196608336	Fibroblast.47XYY-Fibroblast.46XY	142	7	56.8958	Distal Intergenic	Hyper	HECT, C2 and WW domain containing E3 ubiquitin protein ligase 2	ENSG00000138411.Intergenic	Intergenic	Fibroblast	no		1166.7	-0.962662	0.182343	-5.2794	1.29609e-07	2.91654e-06	down
ENSG00000138468	SENP7	3	101511979	101512115	Fibroblast.47XYY-Fibroblast.46XY	137	18	93.9137	Promoter (1-2kb)	Hyper	SUMO specific peptidase 7	ENSG00000138468.Promoter	Promoter	Fibroblast	no		957.981	0.508131	0.100027	5.07992	3.77599e-07	7.68521e-06	not sig
ENSG00000138741	TRPC3	4	121964505	121964663	Fibroblast.47XYY-Fibroblast.46XY	159	5	37.4459	Distal Intergenic	Hyper	transient receptor potential cation channel subfamily C member 3	ENSG00000138741.Intergenic	Intergenic	Fibroblast	no
ENSG00000138758	SEPTIN11	4	76948299	76948407	Fibroblast.47XYY-Fibroblast.46XY	109	16	-74.2959	Promoter (1-2kb)	Hypo	septin 11	ENSG00000138758.Promoter	Promoter	Fibroblast	no		54627.4	0.167269	0.141103	1.18544	0.235843	0.468248	not sig
ENSG00000138759	FRAS1	4	78466200	78466328	Fibroblast.47XYY-Fibroblast.46XY	129	12	53.5701	Exon (ENST00000512123/ENSG00000138759, exon 50 of 74)	Hyper	Fraser extracellular matrix complex subunit 1	ENSG00000138759.GeneBody	GeneBody	Fibroblast	no		2910.68	-0.916236	0.282991	-3.23768	0.00120505	0.00910091	down
ENSG00000138792	ENPEP	4	110476604	110476931	Fibroblast.47XYY-Fibroblast.46XY	328	25	135.893	Promoter (<=1kb)	Hyper	glutamyl aminopeptidase	ENSG00000138792.Promoter	Promoter	Fibroblast	no		193.905	0.577543	0.460268	1.2548	0.209553	0.435766	not sig
ENSG00000138892	TTLL8	22	50035219	50035337	Fibroblast.47XYY-Fibroblast.46XY	119	6	34.0345	Intron (ENST00000266182/ENSG00000138892, intron 8 of 13)	Hyper	tubulin tyrosine ligase like 8	ENSG00000138892.GeneBody	GeneBody	Fibroblast	no
ENSG00000138892	TTLL8	22	50046692	50046801	Fibroblast.47XYY-Fibroblast.46XY	110	4	20.2583	Intron (ENST00000266182/ENSG00000138892, intron 4 of 13)	Hyper	tubulin tyrosine ligase like 8	ENSG00000138892.GeneBody	GeneBody	Fibroblast	no
ENSG00000138944	SHISAL1	22	44319622	44319733	Fibroblast.47XYY-Fibroblast.46XY	112	9	-36.2717	Distal Intergenic	Hypo	shisa like 1	ENSG00000138944.Intergenic	Intergenic	Fibroblast	no		567.38	-1.044	0.320023	-3.26227	0.00110524	0.00849277	down
ENSG00000139044	B4GALNT3	12	543849	543911	Fibroblast.47XYY-Fibroblast.46XY	63	6	23.8022	Promoter (<=1kb)	Hyper	beta-1,4-N-acetyl-galactosaminyltransferase 3	ENSG00000139044.Promoter	Promoter	Fibroblast	no
ENSG00000139209	SLC38A4	12	46830888	46831040	Fibroblast.47XYY-Fibroblast.46XY	153	11	-59.391	Promoter (1-2kb)	Hypo	solute carrier family 38 member 4	ENSG00000139209.Promoter	Promoter	Fibroblast	no		1014.61	-0.427834	0.229615	-1.86327	0.062425	0.196093	not sig
ENSG00000139364	TMEM132B	12	125384106	125384238	Fibroblast.47XYY-Fibroblast.46XY	133	8	38.1294	Intron (ENST00000299308/ENSG00000139364, intron 2 of 8)	Hyper	transmembrane protein 132B	ENSG00000139364.GeneBody	GeneBody	Fibroblast	no		150.079	0.122209	0.246	0.496786	0.61934	0.79621	not sig
ENSG00000139438	FAM222A	12	109712389	109712487	Fibroblast.47XYY-Fibroblast.46XY	99	12	75.1378	Promoter (1-2kb)	Hyper	family with sequence similarity 222 member A	ENSG00000139438.Promoter	Promoter	Fibroblast	no
ENSG00000139915	MDGA2	14	47154384	47154482	Fibroblast.47XYY-Fibroblast.46XY	99	5	23.3702	Intron (ENST00000426342/ENSG00000139915, intron 2 of 15)	Hyper	MAM domain containing glycosylphosphatidylinositol anchor 2	ENSG00000139915.GeneBody	GeneBody	Fibroblast	no
ENSG00000139970	RTN1	14	59869440	59869574	Fibroblast.47XYY-Fibroblast.46XY	135	18	-119.811	Promoter (1-2kb)	Hypo	reticulon 1	ENSG00000139970.Promoter	Promoter	Fibroblast	no		29.7136	-3.02807	0.712523	-4.24979	2.1397e-05	0.000281227	down
ENSG00000139971	ARMH4	14	58126894	58127052	Fibroblast.47XYY-Fibroblast.46XY	159	6	29.7809	Intron (ENST00000267485/ENSG00000139971, intron 4 of 7)	Hyper	armadillo like helical domain containing 4	ENSG00000139971.GeneBody	GeneBody	Fibroblast	no		1278.38	-0.29128	0.114009	-2.5549	0.0106219	0.0524111	not sig
ENSG00000140044	JDP2	14	75457857	75457909	Fibroblast.47XYY-Fibroblast.46XY	53	7	-51.9156	Intron (ENST00000419727/ENSG00000140044, intron 2 of 3)	Hypo	Jun dimerization protein 2	ENSG00000140044.GeneBody	GeneBody	Fibroblast	no		3619.32	-0.235095	0.210591	-1.11636	0.264268	0.500516	not sig
ENSG00000140092	FBLN5	14	91879314	91879442	Fibroblast.47XYY-Fibroblast.46XY	129	4	-26.8127	Promoter (1-2kb)	Hypo	fibulin 5	ENSG00000140092.Promoter	Promoter	Fibroblast	no		17770.7	-0.829191	0.260811	-3.17928	0.00147643	0.0107341	down
ENSG00000140279	DUOX2	15	45097325	45097441	Fibroblast.47XYY-Fibroblast.46XY	117	4	21.7626	Promoter (2-3kb)	Hyper	dual oxidase 2	ENSG00000140279.Promoter	Promoter	Fibroblast	no
ENSG00000140368	PSTPIP1	15	76996474	76996706	Fibroblast.47XYY-Fibroblast.46XY	233	6	30.7376	Promoter (<=1kb)	Hyper	proline-serine-threonine phosphatase interacting protein 1	ENSG00000140368.Promoter	Promoter	Fibroblast	no
ENSG00000140464	PML	15	73995986	73996047	Fibroblast.47XYY-Fibroblast.46XY	62	5	27.5567	Promoter (1-2kb)	Hyper	PML nuclear body scaffold	ENSG00000140464.Promoter	Promoter	Fibroblast	no		3811.38	-0.0656117	0.198431	-0.330652	0.740907	0.86838	not sig
ENSG00000140464	PML	15	73995846	73995901	Fibroblast.47XYY-Fibroblast.46XY	56	6	27.367	Promoter (1-2kb)	Hyper	PML nuclear body scaffold	ENSG00000140464.Promoter	Promoter	Fibroblast	no		3811.38	-0.0656117	0.198431	-0.330652	0.740907	0.86838	not sig
ENSG00000140470	ADAMTS17	15	100277105	100277215	Fibroblast.47XYY-Fibroblast.46XY	111	7	-33.8518	Intron (ENST00000268070/ENSG00000140470, intron 4 of 21)	Hypo	ADAM metallopeptidase with thrombospondin type 1 motif 17	ENSG00000140470.GeneBody	GeneBody	Fibroblast	no
ENSG00000140470	ADAMTS17	15	100340151	100340291	Fibroblast.47XYY-Fibroblast.46XY	141	16	-122.921	Promoter (<=1kb)	Hypo	ADAM metallopeptidase with thrombospondin type 1 motif 17	ENSG00000140470.Promoter	Promoter	Fibroblast	no
ENSG00000140506	LMAN1L	15	74808549	74808640	Fibroblast.47XYY-Fibroblast.46XY	92	10	48.5417	Distal Intergenic	Hyper	lectin, mannose binding 1 like	ENSG00000140506.Intergenic	Intergenic	Fibroblast	no
ENSG00000140519	RHCG	15	89449414	89449511	Fibroblast.47XYY-Fibroblast.46XY	98	5	-23.9229	Distal Intergenic	Hypo	Rh family C glycoprotein	ENSG00000140519.Intergenic	Intergenic	Fibroblast	no
ENSG00000140538	NTRK3	15	88061679	88061730	Fibroblast.47XYY-Fibroblast.46XY	52	5	24.5742	Intron (ENST00000394480/ENSG00000140538, intron 13 of 18)	Hyper	neurotrophic receptor tyrosine kinase 3	ENSG00000140538.GeneBody	GeneBody	Fibroblast	no		66.7849	-0.343672	0.28278	-1.21534	0.224238	0.454497	not sig
ENSG00000140743	CDR2	16	22425634	22425785	Fibroblast.47XYY-Fibroblast.46XY	152	11	88.3469	Intron (ENST00000564542/ENSG00000140743, intron 2 of 6)	Hyper	cerebellar degeneration related protein 2	ENSG00000140743.GeneBody	GeneBody	Fibroblast	no		2210.62	-0.117027	0.131332	-0.891079	0.372887	0.610993	not sig
ENSG00000140992	PDPK1	16	2537202	2537265	Fibroblast.47XYY-Fibroblast.46XY	64	10	51.6926	Promoter (<=1kb)	Hyper	3-phosphoinositide dependent protein kinase 1	ENSG00000140992.Promoter	Promoter	Fibroblast	no		1848.86	-0.0846026	0.0936407	-0.903481	0.36627	0.605612	not sig
ENSG00000141013	GAS8	16	90034344	90034478	Fibroblast.47XYY-Fibroblast.46XY	135	14	81.2711	Promoter (1-2kb)	Hyper	growth arrest specific 8	ENSG00000141013.Promoter	Promoter	Fibroblast	no		285.778	0.0542724	0.114801	0.472752	0.63639	0.807694	not sig
ENSG00000141252	VPS53	17	710700	710813	Fibroblast.47XYY-Fibroblast.46XY	114	5	30.1309	Intron (ENST00000437048/ENSG00000141252, intron 1 of 21)	Hyper	VPS53 subunit of GARP complex	ENSG00000141252.GeneBody	GeneBody	Fibroblast	no		1609.85	-0.262963	0.202312	-1.29979	0.193674	0.414827	not sig
ENSG00000141279	NPEPPS	17	47538749	47538823	Fibroblast.47XYY-Fibroblast.46XY	75	8	40.9715	Intron (ENST00000525007/ENSG00000141279, intron 2 of 5)	Hyper	aminopeptidase puromycin sensitive	ENSG00000141279.GeneBody	GeneBody	Fibroblast	no		4414.12	-0.0914912	0.10875	-0.841301	0.400179	0.636548	not sig
ENSG00000141338	ABCA8	17	68876498	68876659	Fibroblast.47XYY-Fibroblast.46XY	162	8	-40.6795	Promoter (<=1kb)	Hypo	ATP binding cassette subfamily A member 8	ENSG00000141338.Promoter	Promoter	Fibroblast	no		190.153	-0.536501	1.02076	-0.525591	0.599173	0.783378	not sig
ENSG00000141431	ASXL3	18	33743025	33743087	Fibroblast.47XYY-Fibroblast.46XY	63	7	31.2177	3' UTR	Hyper	ASXL transcriptional regulator 3	ENSG00000141431.GeneBody	GeneBody	Fibroblast	no
ENSG00000141447	OSBPL1A	18	24395985	24396075	Fibroblast.47XYY-Fibroblast.46XY	91	9	48.2248	Promoter (1-2kb)	Hyper	oxysterol binding protein like 1A	ENSG00000141447.Promoter	Promoter	Fibroblast	no		1624.09	-0.107768	0.163648	-0.658533	0.510196	0.723398	not sig
ENSG00000141447	OSBPL1A	18	24303103	24303161	Fibroblast.47XYY-Fibroblast.46XY	59	6	26.7694	Intron (ENST00000319481/ENSG00000141447, intron 14 of 27)	Hyper	oxysterol binding protein like 1A	ENSG00000141447.GeneBody	GeneBody	Fibroblast	no		1624.09	-0.107768	0.163648	-0.658533	0.510196	0.723398	not sig
ENSG00000141456	PELP1	17	4665100	4665205	Fibroblast.47XYY-Fibroblast.46XY	106	4	23.9688	Distal Intergenic	Hyper	proline, glutamate and leucine rich protein 1	ENSG00000141456.Intergenic	Intergenic	Fibroblast	no		1969.02	-0.0363332	0.12081	-0.300747	0.763607	0.882766	not sig
ENSG00000141527	CARD14	17	80187310	80187609	Fibroblast.47XYY-Fibroblast.46XY	300	19	123.41	Promoter (<=1kb)	Hyper	caspase recruitment domain family member 14	ENSG00000141527.Promoter	Promoter	Fibroblast	no
ENSG00000141540	TTYH2	17	74215501	74215668	Fibroblast.47XYY-Fibroblast.46XY	168	10	52.9515	Promoter (<=1kb)	Hyper	tweety family member 2	ENSG00000141540.Promoter	Promoter	Fibroblast	no
ENSG00000141540	TTYH2	17	74241247	74241338	Fibroblast.47XYY-Fibroblast.46XY	92	4	24.7563	Promoter (<=1kb)	Hyper	tweety family member 2	ENSG00000141540.Promoter	Promoter	Fibroblast	no
ENSG00000141542	RAB40B	17	82665384	82665450	Fibroblast.47XYY-Fibroblast.46XY	67	7	-34.3495	Promoter (<=1kb)	Hypo	RAB40B, member RAS oncogene family	ENSG00000141542.Promoter	Promoter	Fibroblast	no		360.568	-0.128436	0.131072	-0.979886	0.327142	0.56701	not sig
ENSG00000141556	TBCD	17	82881296	82881376	Fibroblast.47XYY-Fibroblast.46XY	81	13	57.6586	Promoter (2-3kb)	Hyper	tubulin folding cofactor D	ENSG00000141556.Promoter	Promoter	Fibroblast	no		2800.73	-0.394434	0.152453	-2.58725	0.00967448	0.0486634	not sig
ENSG00000141562	NARF	17	82486297	82486362	Fibroblast.47XYY-Fibroblast.46XY	66	7	-31.6361	Promoter (1-2kb)	Hypo	nuclear prelamin A recognition factor	ENSG00000141562.Promoter	Promoter	Fibroblast	no		1490.92	0.560703	0.153042	3.66371	0.000248584	0.00238803	not sig
ENSG00000141564	RPTOR	17	80746486	80746602	Fibroblast.47XYY-Fibroblast.46XY	117	6	-29.8421	Intron (ENST00000574767/ENSG00000141564, intron 4 of 11)	Hypo	regulatory associated protein of MTOR complex 1	ENSG00000141564.GeneBody	GeneBody	Fibroblast	no		1653.35	-0.15975	0.131128	-1.21828	0.223116	0.452989	not sig
ENSG00000141574	SECTM1	17	82330111	82330244	Fibroblast.47XYY-Fibroblast.46XY	134	18	-85.0241	Promoter (1-2kb)	Hypo	secreted and transmembrane 1	ENSG00000141574.Promoter	Promoter	Fibroblast	no		237.433	0.308051	0.350585	0.878677	0.379576	0.616794	not sig
ENSG00000141574	SECTM1	17	82334678	82334884	Fibroblast.47XYY-Fibroblast.46XY	207	12	57.6875	Promoter (<=1kb)	Hyper	secreted and transmembrane 1	ENSG00000141574.Promoter	Promoter	Fibroblast	no		237.433	0.308051	0.350585	0.878677	0.379576	0.616794	not sig
ENSG00000141574	SECTM1	17	82334444	82334578	Fibroblast.47XYY-Fibroblast.46XY	135	22	113.142	Promoter (<=1kb)	Hyper	secreted and transmembrane 1	ENSG00000141574.Promoter	Promoter	Fibroblast	no		237.433	0.308051	0.350585	0.878677	0.379576	0.616794	not sig
ENSG00000141582	CBX4	17	79836702	79836794	Fibroblast.47XYY-Fibroblast.46XY	93	14	-65.9626	Promoter (1-2kb)	Hypo	chromobox 4	ENSG00000141582.Promoter	Promoter	Fibroblast	no		616.386	0.265744	0.155149	1.71284	0.0867425	0.246617	not sig
ENSG00000141582	CBX4	17	79836870	79837113	Fibroblast.47XYY-Fibroblast.46XY	244	23	-107.369	Promoter (<=1kb)	Hypo	chromobox 4	ENSG00000141582.Promoter	Promoter	Fibroblast	no		616.386	0.265744	0.155149	1.71284	0.0867425	0.246617	not sig
ENSG00000141668	CBLN2	18	72642568	72642691	Fibroblast.47XYY-Fibroblast.46XY	124	10	45.666	Distal Intergenic	Hyper	cerebellin 2 precursor	ENSG00000141668.Intergenic	Intergenic	Fibroblast	no
ENSG00000141753	IGFBP4	17	40452969	40453080	Fibroblast.47XYY-Fibroblast.46XY	112	12	47.3183	Exon (ENST00000269593/ENSG00000141753, exon 2 of 4)	Hyper	insulin like growth factor binding protein 4	ENSG00000141753.GeneBody	GeneBody	Fibroblast	no		41767.8	-1.35489	0.252433	-5.36732	7.99157e-08	1.87497e-06	down
ENSG00000141837	CACNA1A	19	13610904	13611012	Fibroblast.47XYY-Fibroblast.46XY	109	6	31.2208	Intron (ENST00000574974/ENSG00000141837, intron 2 of 5)	Hyper	calcium voltage-gated channel subunit alpha1 A	ENSG00000141837.GeneBody	GeneBody	Fibroblast	no		949.823	-0.195078	0.277749	-0.702354	0.482459	0.701218	not sig
ENSG00000141854	MISP3	19	14075569	14075706	Fibroblast.47XYY-Fibroblast.46XY	138	18	104.915	Promoter (1-2kb)	Hyper	MISP family member 3	ENSG00000141854.Promoter	Promoter	Fibroblast	no
ENSG00000141867	BRD4	19	15298358	15298419	Fibroblast.47XYY-Fibroblast.46XY	62	9	56.7019	Intron (ENST00000360016/ENSG00000141867, intron 1 of 11)	Hyper	bromodomain containing 4	ENSG00000141867.GeneBody	GeneBody	Fibroblast	no		4313.78	0.103236	0.14821	0.69655	0.486085	0.703637	not sig
ENSG00000141905	NFIC	19	3313927	3313990	Fibroblast.47XYY-Fibroblast.46XY	64	6	25.9545	Promoter (<=1kb)	Hyper	nuclear factor I C	ENSG00000141905.Promoter	Promoter	Fibroblast	no		9115.21	-0.147698	0.129952	-1.13656	0.255724	0.49104	not sig
ENSG00000141905	NFIC	19	3334116	3334234	Fibroblast.47XYY-Fibroblast.46XY	119	9	51.2942	Intron (ENST00000641145/ENSG00000141905, intron 1 of 10)	Hyper	nuclear factor I C	ENSG00000141905.GeneBody	GeneBody	Fibroblast	no		9115.21	-0.147698	0.129952	-1.13656	0.255724	0.49104	not sig
ENSG00000141956	PRDM15	21	41802350	41802454	Fibroblast.47XYY-Fibroblast.46XY	105	5	-25.7563	Promoter (<=1kb)	Hypo	PR/SET domain 15	ENSG00000141956.Promoter	Promoter	Fibroblast	no		568.871	-0.0385418	0.219789	-0.175358	0.860798	0.931304	not sig
ENSG00000142002	DPP9	19	4713600	4713717	Fibroblast.47XYY-Fibroblast.46XY	118	14	97.0412	Promoter (<=1kb)	Hyper	dipeptidyl peptidase 9	ENSG00000142002.Promoter	Promoter	Fibroblast	no		3333.68	-0.183425	0.176576	-1.03879	0.298904	0.53886	not sig
ENSG00000142156	COL6A1	21	45985617	45985721	Fibroblast.47XYY-Fibroblast.46XY	105	12	55.2001	Promoter (1-2kb)	Hyper	collagen type VI alpha 1 chain	ENSG00000142156.Promoter	Promoter	Fibroblast	no		216708	-0.0250641	0.163744	-0.153069	0.878344	0.940655	not sig
ENSG00000142235	LMTK3	19	48494489	48494624	Fibroblast.47XYY-Fibroblast.46XY	136	4	-20.9936	Intron (ENST00000648216/ENSG00000142235, intron 1 of 4)	Hypo	lemur tyrosine kinase 3	ENSG00000142235.GeneBody	GeneBody	Fibroblast	no
ENSG00000142303	ADAMTS10	19	8596306	8596365	Fibroblast.47XYY-Fibroblast.46XY	60	5	22.408	Promoter (<=1kb)	Hyper	ADAM metallopeptidase with thrombospondin type 1 motif 10	ENSG00000142303.Promoter	Promoter	Fibroblast	no		1169.99	1.0454	0.237942	4.39349	1.11543e-05	0.000157582	up
ENSG00000142409	ZNF787	19	56119808	56119903	Fibroblast.47XYY-Fibroblast.46XY	96	9	41.5162	Promoter (1-2kb)	Hyper	zinc finger protein 787	ENSG00000142409.Promoter	Promoter	Fibroblast	no		706.615	0.0850786	0.143933	0.5911	0.554454	0.752933	not sig
ENSG00000142459	EVI5L	19	7846167	7846279	Fibroblast.47XYY-Fibroblast.46XY	113	6	39.0532	Promoter (<=1kb)	Hyper	ecotropic viral integration site 5 like	ENSG00000142459.Promoter	Promoter	Fibroblast	no		1405.27	-0.195819	0.118607	-1.65099	0.0987413	0.27026	not sig
ENSG00000142494	SLC47A1	17	19523985	19526212	Fibroblast.47XYY-Fibroblast.46XY	2228	21	109.602	Intron (ENST00000584348/ENSG00000142494, intron 1 of 6)	Hyper	solute carrier family 47 member 1	ENSG00000142494.GeneBody	GeneBody	Fibroblast	no
ENSG00000142552	RCN3	19	49533410	49533511	Fibroblast.47XYY-Fibroblast.46XY	102	6	-26.0489	Intron (ENST00000270645/ENSG00000142552, intron 2 of 6)	Hypo	reticulocalbin 3	ENSG00000142552.GeneBody	GeneBody	Fibroblast	no		15406.1	-0.196284	0.165088	-1.18897	0.234452	0.466749	not sig
ENSG00000142552	RCN3	19	49534364	49534486	Fibroblast.47XYY-Fibroblast.46XY	123	23	-107.073	Exon (ENST00000270645/ENSG00000142552, exon 3 of 7)	Hypo	reticulocalbin 3	ENSG00000142552.GeneBody	GeneBody	Fibroblast	no		15406.1	-0.196284	0.165088	-1.18897	0.234452	0.466749	not sig
ENSG00000142606	MMEL1	1	2633825	2633957	Fibroblast.47XYY-Fibroblast.46XY	133	6	31.8451	Promoter (<=1kb)	Hyper	membrane metalloendopeptidase like 1	ENSG00000142606.Promoter	Promoter	Fibroblast	no
ENSG00000142611	PRDM16	1	3429151	3429207	Fibroblast.47XYY-Fibroblast.46XY	57	6	30.9837	Intron (ENST00000511072/ENSG00000142611, intron 14 of 15)	Hyper	PR/SET domain 16	ENSG00000142611.GeneBody	GeneBody	Fibroblast	no		57.03	3.13541	0.599802	5.22741	1.71905e-07	3.77819e-06	up
ENSG00000142611	PRDM16	1	3276207	3276438	Fibroblast.47XYY-Fibroblast.46XY	232	22	116.63	Intron (ENST00000511072/ENSG00000142611, intron 3 of 15)	Hyper	PR/SET domain 16	ENSG00000142611.GeneBody	GeneBody	Fibroblast	no		57.03	3.13541	0.599802	5.22741	1.71905e-07	3.77819e-06	up
ENSG00000142611	PRDM16	1	3272492	3272625	Fibroblast.47XYY-Fibroblast.46XY	134	17	98.5486	Intron (ENST00000511072/ENSG00000142611, intron 3 of 15)	Hyper	PR/SET domain 16	ENSG00000142611.GeneBody	GeneBody	Fibroblast	no		57.03	3.13541	0.599802	5.22741	1.71905e-07	3.77819e-06	up
ENSG00000142619	PADI3	1	17245276	17245401	Fibroblast.47XYY-Fibroblast.46XY	126	6	-37.0357	3' UTR	Hypo	peptidyl arginine deiminase 3	ENSG00000142619.GeneBody	GeneBody	Fibroblast	no
ENSG00000142798	HSPG2	1	21927817	21927924	Fibroblast.47XYY-Fibroblast.46XY	108	6	34.6859	Intron (ENST00000374695/ENSG00000142798, intron 1 of 96)	Hyper	heparan sulfate proteoglycan 2	ENSG00000142798.GeneBody	GeneBody	Fibroblast	no		65929.6	-0.644528	0.245863	-2.6215	0.00875445	0.0451004	down
ENSG00000142945	KIF2C	1	44738331	44738465	Fibroblast.47XYY-Fibroblast.46XY	135	10	-49.7618	Promoter (1-2kb)	Hypo	kinesin family member 2C	ENSG00000142945.Promoter	Promoter	Fibroblast	no		1206.41	0.0878021	0.290749	0.301986	0.762663	0.881983	not sig
ENSG00000143013	LMO4	1	87286566	87286701	Fibroblast.47XYY-Fibroblast.46XY	136	12	84.1443	Distal Intergenic	Hyper	LIM domain only 4	ENSG00000143013.Intergenic	Intergenic	Fibroblast	no		3169.3	-0.108721	0.172775	-0.629266	0.529175	0.735922	not sig
ENSG00000143079	CTTNBP2NL	1	112391714	112391787	Fibroblast.47XYY-Fibroblast.46XY	74	9	45.2345	Distal Intergenic	Hyper	CTTNBP2 N-terminal like	ENSG00000143079.Intergenic	Intergenic	Fibroblast	no		3302.98	0.0434814	0.129803	0.334981	0.73764	0.866743	not sig
ENSG00000143147	GPR161	1	168085515	168085636	Fibroblast.47XYY-Fibroblast.46XY	122	15	71.2315	3' UTR	Hyper	G protein-coupled receptor 161	ENSG00000143147.GeneBody	GeneBody	Fibroblast	no		1843.89	0.0640409	0.219796	0.291365	0.770772	0.886701	not sig
ENSG00000143319	ISG20L2	1	156726954	156727145	Fibroblast.47XYY-Fibroblast.46XY	192	12	67.8837	Promoter (<=1kb)	Hyper	interferon stimulated exonuclease gene 20 like 2	ENSG00000143319.Promoter	Promoter	Fibroblast	no		1256.24	-0.0608207	0.181586	-0.334942	0.737669	0.866743	not sig
ENSG00000143333	RGS16	1	182600263	182600341	Fibroblast.47XYY-Fibroblast.46XY	79	6	25.7227	3' UTR	Hyper	regulator of G protein signaling 16	ENSG00000143333.GeneBody	GeneBody	Fibroblast	no
ENSG00000143376	SNX27	1	151594687	151594825	Fibroblast.47XYY-Fibroblast.46XY	139	6	33.8902	Distal Intergenic	Hyper	sorting nexin 27	ENSG00000143376.Intergenic	Intergenic	Fibroblast	no		1087.64	0.00994987	0.126834	0.078448	0.937472	0.970229	not sig
ENSG00000143412	ANXA9	1	150979260	150979379	Fibroblast.47XYY-Fibroblast.46XY	120	11	54.7315	Promoter (2-3kb)	Hyper	annexin A9	ENSG00000143412.Promoter	Promoter	Fibroblast	no
ENSG00000143412	ANXA9	1	150979085	150979161	Fibroblast.47XYY-Fibroblast.46XY	77	4	19.516	Distal Intergenic	Hyper	annexin A9	ENSG00000143412.Intergenic	Intergenic	Fibroblast	no
ENSG00000143437	ARNT	1	150877036	150877090	Fibroblast.47XYY-Fibroblast.46XY	55	6	25.6957	Promoter (<=1kb)	Hyper	aryl hydrocarbon receptor nuclear translocator	ENSG00000143437.Promoter	Promoter	Fibroblast	no		2569.73	-0.000387851	0.191367	-0.00202674	0.998383	0.999048	not sig
ENSG00000143457	GOLPH3L	1	150667685	150667741	Fibroblast.47XYY-Fibroblast.46XY	57	9	42.0781	Intron (ENST00000271732/ENSG00000143457, intron 2 of 4)	Hyper	golgi phosphoprotein 3 like	ENSG00000143457.GeneBody	GeneBody	Fibroblast	no		816.557	-0.0255477	0.144112	-0.177277	0.859291	0.930887	not sig
ENSG00000143469	SYT14	1	210103271	210103406	Fibroblast.47XYY-Fibroblast.46XY	136	10	70.0119	Intron (ENST00000367019/ENSG00000143469, intron 6 of 8)	Hyper	synaptotagmin 14	ENSG00000143469.GeneBody	GeneBody	Fibroblast	no		242.252	0.60877	0.623305	0.97668	0.328727	0.568602	not sig
ENSG00000143469	SYT14	1	210056536	210056682	Fibroblast.47XYY-Fibroblast.46XY	147	4	20.8951	Intron (ENST00000367019/ENSG00000143469, intron 4 of 8)	Hyper	synaptotagmin 14	ENSG00000143469.GeneBody	GeneBody	Fibroblast	no		242.252	0.60877	0.623305	0.97668	0.328727	0.568602	not sig
ENSG00000143469	SYT14	1	209878118	209878287	Fibroblast.47XYY-Fibroblast.46XY	170	8	47.9717	Distal Intergenic	Hyper	synaptotagmin 14	ENSG00000143469.Intergenic	Intergenic	Fibroblast	no		242.252	0.60877	0.623305	0.97668	0.328727	0.568602	not sig
ENSG00000143469	SYT14	1	210047439	210047558	Fibroblast.47XYY-Fibroblast.46XY	120	8	47.1517	Intron (ENST00000367019/ENSG00000143469, intron 4 of 8)	Hyper	synaptotagmin 14	ENSG00000143469.GeneBody	GeneBody	Fibroblast	no		242.252	0.60877	0.623305	0.97668	0.328727	0.568602	not sig
ENSG00000143469	SYT14	1	210075494	210075632	Fibroblast.47XYY-Fibroblast.46XY	139	12	59.299	Intron (ENST00000367019/ENSG00000143469, intron 4 of 8)	Hyper	synaptotagmin 14	ENSG00000143469.GeneBody	GeneBody	Fibroblast	no		242.252	0.60877	0.623305	0.97668	0.328727	0.568602	not sig
ENSG00000143514	TP53BP2	1	223847184	223847315	Fibroblast.47XYY-Fibroblast.46XY	132	12	52.5681	Promoter (1-2kb)	Hyper	tumor protein p53 binding protein 2	ENSG00000143514.Promoter	Promoter	Fibroblast	no		1807.94	0.163633	0.16797	0.974181	0.329967	0.569995	not sig
ENSG00000143549	TPM3	1	154188441	154188531	Fibroblast.47XYY-Fibroblast.46XY	91	10	42.0385	Intron (ENST00000271850/ENSG00000143549, intron 2 of 8)	Hyper	tropomyosin 3	ENSG00000143549.GeneBody	GeneBody	Fibroblast	no		16201.8	-0.295169	0.20877	-1.41385	0.157405	0.364702	not sig
ENSG00000143614	GATAD2B	1	153904007	153904136	Fibroblast.47XYY-Fibroblast.46XY	130	12	59.473	Intron (ENST00000368655/ENSG00000143614, intron 1 of 10)	Hyper	GATA zinc finger domain containing 2B	ENSG00000143614.GeneBody	GeneBody	Fibroblast	no		981.338	-0.202831	0.14814	-1.36919	0.17094	0.384281	not sig
ENSG00000143774	GUK1	1	228141175	228141274	Fibroblast.47XYY-Fibroblast.46XY	100	11	41.5684	Promoter (<=1kb)	Hyper	guanylate kinase 1	ENSG00000143774.Promoter	Promoter	Fibroblast	no		5522.28	-0.178394	0.192255	-0.927905	0.353457	0.59262	not sig
ENSG00000143774	GUK1	1	228141337	228141732	Fibroblast.47XYY-Fibroblast.46XY	396	27	125.842	Promoter (<=1kb)	Hyper	guanylate kinase 1	ENSG00000143774.Promoter	Promoter	Fibroblast	no		5522.28	-0.178394	0.192255	-0.927905	0.353457	0.59262	not sig
ENSG00000143819	EPHX1	1	225817857	225817979	Fibroblast.47XYY-Fibroblast.46XY	123	7	32.3508	Intron (ENST00000445856/ENSG00000143819, intron 1 of 3)	Hyper	epoxide hydrolase 1	ENSG00000143819.GeneBody	GeneBody	Fibroblast	no		1471.3	-1.2117	0.287424	-4.21572	2.48988e-05	0.000320866	down
ENSG00000143850	PLEKHA6	1	204281253	204281381	Fibroblast.47XYY-Fibroblast.46XY	129	6	31.3096	Promoter (2-3kb)	Hyper	pleckstrin homology domain containing A6	ENSG00000143850.Promoter	Promoter	Fibroblast	no		197.979	3.53409	0.569283	6.20796	5.36761e-10	2.04325e-08	up
ENSG00000143889	HNRNPLL	2	38628540	38628674	Fibroblast.47XYY-Fibroblast.46XY	135	6	33.2018	Distal Intergenic	Hyper	heterogeneous nuclear ribonucleoprotein L like	ENSG00000143889.Intergenic	Intergenic	Fibroblast	no		1823.89	-0.0463207	0.154415	-0.299976	0.764196	0.882978	not sig
ENSG00000143919	CAMKMT	2	44783096	44783231	Fibroblast.47XYY-Fibroblast.46XY	136	11	72.2399	Distal Intergenic	Hyper	calmodulin-lysine N-methyltransferase	ENSG00000143919.Intergenic	Intergenic	Fibroblast	no		130.122	-0.442364	0.180595	-2.44948	0.0143064	0.0657298	not sig
ENSG00000143924	EML4	2	42265312	42265486	Fibroblast.47XYY-Fibroblast.46XY	175	11	54.3745	Intron (ENST00000402711/ENSG00000143924, intron 5 of 21)	Hyper	EMAP like 4	ENSG00000143924.GeneBody	GeneBody	Fibroblast	no		2712.16	-0.160305	0.198473	-0.807691	0.419268	0.653388	not sig
ENSG00000143954	REG3G	2	78991279	78991437	Fibroblast.47XYY-Fibroblast.46XY	159	5	22.9031	Distal Intergenic	Hyper	regenerating family member 3 gamma	ENSG00000143954.Intergenic	Intergenic	Fibroblast	no
ENSG00000143995	MEIS1	2	66444708	66444815	Fibroblast.47XYY-Fibroblast.46XY	108	5	-25.0194	Promoter (<=1kb)	Hypo	Meis homeobox 1	ENSG00000143995.Promoter	Promoter	Fibroblast	no		831.71	0.37683	0.126455	2.97996	0.00288284	0.0185981	not sig
ENSG00000143995	MEIS1	2	66412327	66412461	Fibroblast.47XYY-Fibroblast.46XY	135	9	39.7813	Distal Intergenic	Hyper	Meis homeobox 1	ENSG00000143995.Intergenic	Intergenic	Fibroblast	no		831.71	0.37683	0.126455	2.97996	0.00288284	0.0185981	not sig
ENSG00000143995	MEIS1	2	66426910	66427033	Fibroblast.47XYY-Fibroblast.46XY	124	14	-87.4577	Exon (ENST00000454167/ENSG00000226819, exon 4 of 4)	Hypo	Meis homeobox 1	ENSG00000143995.GeneBody	GeneBody	Fibroblast	no		831.71	0.37683	0.126455	2.97996	0.00288284	0.0185981	not sig
ENSG00000143995	MEIS1	2	66446586	66446776	Fibroblast.47XYY-Fibroblast.46XY	191	19	-97.9849	Promoter (1-2kb)	Hypo	Meis homeobox 1	ENSG00000143995.Promoter	Promoter	Fibroblast	no		831.71	0.37683	0.126455	2.97996	0.00288284	0.0185981	not sig
ENSG00000143995	MEIS1	2	66445495	66445752	Fibroblast.47XYY-Fibroblast.46XY	258	40	-205.956	Promoter (<=1kb)	Hypo	Meis homeobox 1	ENSG00000143995.Promoter	Promoter	Fibroblast	no		831.71	0.37683	0.126455	2.97996	0.00288284	0.0185981	not sig
ENSG00000143995	MEIS1	2	66432304	66432458	Fibroblast.47XYY-Fibroblast.46XY	155	12	-59.5848	Promoter (<=1kb)	Hypo	Meis homeobox 1	ENSG00000143995.Promoter	Promoter	Fibroblast	no		831.71	0.37683	0.126455	2.97996	0.00288284	0.0185981	not sig
ENSG00000144040	SFXN5	2	73028922	73029070	Fibroblast.47XYY-Fibroblast.46XY	149	8	35.0433	Intron (ENST00000474528/ENSG00000144040, intron 3 of 13)	Hyper	sideroflexin 5	ENSG00000144040.GeneBody	GeneBody	Fibroblast	no		641.536	0.148129	0.162281	0.912793	0.361352	0.600833	not sig
ENSG00000144040	SFXN5	2	73059255	73059360	Fibroblast.47XYY-Fibroblast.46XY	106	5	25.6216	Promoter (<=1kb)	Hyper	sideroflexin 5	ENSG00000144040.Promoter	Promoter	Fibroblast	no		641.536	0.148129	0.162281	0.912793	0.361352	0.600833	not sig
ENSG00000144355	DLX1	2	172082862	172082936	Fibroblast.47XYY-Fibroblast.46XY	75	12	-57.9075	Promoter (1-2kb)	Hypo	distal-less homeobox 1	ENSG00000144355.Promoter	Promoter	Fibroblast	no		215.077	-0.80152	0.339409	-2.36152	0.0182004	0.0789004	not sig
ENSG00000144355	DLX1	2	172090244	172090785	Fibroblast.47XYY-Fibroblast.46XY	542	26	-120.381	Promoter (2-3kb)	Hypo	distal-less homeobox 1	ENSG00000144355.Promoter	Promoter	Fibroblast	no		215.077	-0.80152	0.339409	-2.36152	0.0182004	0.0789004	not sig
ENSG00000144355	DLX1	2	172088154	172088268	Fibroblast.47XYY-Fibroblast.46XY	115	12	-54.5207	Promoter (<=1kb)	Hypo	distal-less homeobox 1	ENSG00000144355.Promoter	Promoter	Fibroblast	no		215.077	-0.80152	0.339409	-2.36152	0.0182004	0.0789004	not sig
ENSG00000144452	ABCA12	2	215155814	215155952	Fibroblast.47XYY-Fibroblast.46XY	139	10	48.1423	Distal Intergenic	Hyper	ATP binding cassette subfamily A member 12	ENSG00000144452.Intergenic	Intergenic	Fibroblast	no
ENSG00000144488	ESPNL	2	238108812	238108944	Fibroblast.47XYY-Fibroblast.46XY	133	11	-49.5609	Promoter (<=1kb)	Hypo	espin like	ENSG00000144488.Promoter	Promoter	Fibroblast	no		88.6121	0.825095	0.644725	1.27976	0.200628	0.424628	not sig
ENSG00000144488	ESPNL	2	238133284	238133349	Fibroblast.47XYY-Fibroblast.46XY	66	6	-23.715	3' UTR	Hypo	espin like	ENSG00000144488.GeneBody	GeneBody	Fibroblast	no		88.6121	0.825095	0.644725	1.27976	0.200628	0.424628	not sig
ENSG00000144591	GMPPA	2	219506703	219506769	Fibroblast.47XYY-Fibroblast.46XY	67	9	-45.3444	Promoter (<=1kb)	Hypo	GDP-mannose pyrophosphorylase A	ENSG00000144591.Promoter	Promoter	Fibroblast	no		2740.69	0.118152	0.12417	0.951534	0.341333	0.581641	not sig
ENSG00000144649	GASK1A	3	42988460	42988664	Fibroblast.47XYY-Fibroblast.46XY	205	6	34.024	Intron (ENST00000451200/ENSG00000273291, intron 5 of 5)	Hyper	golgi associated kinase 1A	ENSG00000144649.GeneBody	GeneBody	Fibroblast	no
ENSG00000144668	ITGA9	3	37771128	37771235	Fibroblast.47XYY-Fibroblast.46XY	108	4	34.0669	Intron (ENST00000264741/ENSG00000144668, intron 23 of 27)	Hyper	integrin subunit alpha 9	ENSG00000144668.GeneBody	GeneBody	Fibroblast	no		49.7272	-1.58302	0.282841	-5.59684	2.18288e-08	5.87252e-07	down
ENSG00000144847	IGSF11	3	118902533	118902625	Fibroblast.47XYY-Fibroblast.46XY	93	8	34.0032	Exon (ENST00000393775/ENSG00000144847, exon 7 of 7)	Hyper	immunoglobulin superfamily member 11	ENSG00000144847.GeneBody	GeneBody	Fibroblast	no
ENSG00000144852	NR1I2	3	119820350	119820408	Fibroblast.47XYY-Fibroblast.46XY	59	5	37.5164	Distal Intergenic	Hyper	nuclear receptor subfamily 1 group I member 2	ENSG00000144852.Intergenic	Intergenic	Fibroblast	no
ENSG00000144868	TMEM108	3	133040393	133040497	Fibroblast.47XYY-Fibroblast.46XY	105	4	20.6468	Promoter (1-2kb)	Hyper	transmembrane protein 108	ENSG00000144868.Promoter	Promoter	Fibroblast	no
ENSG00000145331	TRMT10A	4	99562628	99562881	Fibroblast.47XYY-Fibroblast.46XY	254	28	132.594	Promoter (<=1kb)	Hyper	tRNA methyltransferase 10A	ENSG00000145331.Promoter	Promoter	Fibroblast	no		234.375	0.173013	0.135793	1.27409	0.202633	0.426546	not sig
ENSG00000145332	KLHL8	4	87236368	87236501	Fibroblast.47XYY-Fibroblast.46XY	134	10	80.3599	Intron (ENST00000506274/ENSG00000145332, intron 1 of 1)	Hyper	kelch like family member 8	ENSG00000145332.GeneBody	GeneBody	Fibroblast	no		563.869	-0.287814	0.102279	-2.81402	0.00489261	0.0284823	not sig
ENSG00000145423	SFRP2	4	153813578	153813686	Fibroblast.47XYY-Fibroblast.46XY	109	6	27.7696	Distal Intergenic	Hyper	secreted frizzled related protein 2	ENSG00000145423.Intergenic	Intergenic	Fibroblast	no		4687.46	3.91409	0.826874	4.7336	2.20577e-06	3.76435e-05	up
ENSG00000145703	IQGAP2	5	76424467	76424592	Fibroblast.47XYY-Fibroblast.46XY	126	6	34.6604	Intron (ENST00000274364/ENSG00000145703, intron 1 of 35)	Hyper	IQ motif containing GTPase activating protein 2	ENSG00000145703.GeneBody	GeneBody	Fibroblast	no
ENSG00000145863	GABRA6	5	161715225	161715397	Fibroblast.47XYY-Fibroblast.46XY	173	22	112.507	Distal Intergenic	Hyper	gamma-aminobutyric acid type A receptor subunit alpha6	ENSG00000145863.Intergenic	Intergenic	Fibroblast	no
ENSG00000145864	GABRB2	5	161331891	161331981	Fibroblast.47XYY-Fibroblast.46XY	91	8	36.1117	Intron (ENST00000274547/ENSG00000145864, intron 8 of 10)	Hyper	gamma-aminobutyric acid type A receptor subunit beta2	ENSG00000145864.GeneBody	GeneBody	Fibroblast	no
ENSG00000145920	CPLX2	5	175818753	175818809	Fibroblast.47XYY-Fibroblast.46XY	57	4	18.6945	Intron (ENST00000359546/ENSG00000145920, intron 2 of 4)	Hyper	complexin 2	ENSG00000145920.GeneBody	GeneBody	Fibroblast	no
ENSG00000145934	TENM2	5	168147785	168147884	Fibroblast.47XYY-Fibroblast.46XY	100	7	-47.2802	Intron (ENST00000518659/ENSG00000145934, intron 12 of 28)	Hypo	teneurin transmembrane protein 2	ENSG00000145934.GeneBody	GeneBody	Fibroblast	no		12889.5	0.706107	0.24996	2.82488	0.00472983	0.0277057	up
ENSG00000146090	RASGEF1C	5	180215549	180215629	Fibroblast.47XYY-Fibroblast.46XY	81	6	28.8436	Distal Intergenic	Hyper	RasGEF domain family member 1C	ENSG00000146090.Intergenic	Intergenic	Fibroblast	no
ENSG00000146090	RASGEF1C	5	180199460	180199587	Fibroblast.47XYY-Fibroblast.46XY	128	10	49.8542	Intron (ENST00000361132/ENSG00000146090, intron 1 of 13)	Hyper	RasGEF domain family member 1C	ENSG00000146090.GeneBody	GeneBody	Fibroblast	no
ENSG00000146112	PPP1R18	6	30684910	30685004	Fibroblast.47XYY-Fibroblast.46XY	95	4	22.001	Promoter (<=1kb)	Hyper	protein phosphatase 1 regulatory subunit 18	ENSG00000146112.Promoter	Promoter	Fibroblast	no		5608.04	0.214933	0.164686	1.30511	0.191855	0.412606	not sig
ENSG00000146151	HMGCLL1	6	55406658	55406727	Fibroblast.47XYY-Fibroblast.46XY	70	7	34.2799	Distal Intergenic	Hyper	3-hydroxymethyl-3-methylglutaryl-CoA lyase like 1	ENSG00000146151.Intergenic	Intergenic	Fibroblast	no
ENSG00000146267	FAXC	6	99255265	99255363	Fibroblast.47XYY-Fibroblast.46XY	99	4	20.2451	Distal Intergenic	Hyper	failed axon connections homolog, metaxin like GST domain containing	ENSG00000146267.Intergenic	Intergenic	Fibroblast	no		58.49	0.573936	0.298801	1.9208	0.0547574	0.178944	not sig
ENSG00000146426	TIAM2	6	155137344	155137504	Fibroblast.47XYY-Fibroblast.46XY	161	10	-65.1208	Exon (ENST00000461783/ENSG00000146426, exon 7 of 29)	Hypo	TIAM Rac1 associated GEF 2	ENSG00000146426.GeneBody	GeneBody	Fibroblast	no		561.89	-0.656723	0.233993	-2.80659	0.00500688	0.0289056	down
ENSG00000146540	C7orf50	7	1123819	1124006	Fibroblast.47XYY-Fibroblast.46XY	188	25	144.648	Intron (ENST00000357429/ENSG00000146540, intron 2 of 4)	Hyper	chromosome 7 open reading frame 50	ENSG00000146540.GeneBody	GeneBody	Fibroblast	no		1688.48	-0.20229	0.167556	-1.2073	0.227317	0.458543	not sig
ENSG00000146540	C7orf50	7	1123041	1123448	Fibroblast.47XYY-Fibroblast.46XY	408	41	328.607	Intron (ENST00000357429/ENSG00000146540, intron 2 of 4)	Hyper	chromosome 7 open reading frame 50	ENSG00000146540.GeneBody	GeneBody	Fibroblast	no		1688.48	-0.20229	0.167556	-1.2073	0.227317	0.458543	not sig
ENSG00000146555	SDK1	7	4190725	4190855	Fibroblast.47XYY-Fibroblast.46XY	131	9	-50.3047	Intron (ENST00000404826/ENSG00000146555, intron 35 of 44)	Hypo	sidekick cell adhesion molecule 1	ENSG00000146555.GeneBody	GeneBody	Fibroblast	no
ENSG00000146555	SDK1	7	4216147	4216287	Fibroblast.47XYY-Fibroblast.46XY	141	16	80.9383	Intron (ENST00000404826/ENSG00000146555, intron 38 of 44)	Hyper	sidekick cell adhesion molecule 1	ENSG00000146555.GeneBody	GeneBody	Fibroblast	no
ENSG00000146555	SDK1	7	3893230	3893336	Fibroblast.47XYY-Fibroblast.46XY	107	6	29.3508	Intron (ENST00000404826/ENSG00000146555, intron 5 of 44)	Hyper	sidekick cell adhesion molecule 1	ENSG00000146555.GeneBody	GeneBody	Fibroblast	no
ENSG00000146574	CCZ1B	7	6812052	6812206	Fibroblast.47XYY-Fibroblast.46XY	155	4	-24.0631	Promoter (<=1kb)	Hypo	CCZ1 homolog B, vacuolar protein trafficking and biogenesis associated	ENSG00000146574.Promoter	Promoter	Fibroblast	no		906.002	-0.0934072	0.112512	-0.830199	0.406427	0.642087	not sig
ENSG00000146648	EGFR	7	55026547	55026628	Fibroblast.47XYY-Fibroblast.46XY	82	8	35.1246	Intron (ENST00000275493/ENSG00000146648, intron 1 of 27)	Hyper	epidermal growth factor receptor	ENSG00000146648.GeneBody	GeneBody	Fibroblast	no		4712.52	-0.597579	0.283449	-2.10824	0.0350102	0.128173	not sig
ENSG00000146872	TLK2	17	62459795	62461971	Fibroblast.47XYY-Fibroblast.46XY	2177	14	32.939	Promoter (1-2kb)	Hyper	tousled like kinase 2	ENSG00000146872.Promoter	Promoter	Fibroblast	no		2055.4	-0.0238854	0.178705	-0.133659	0.893673	0.948957	not sig
ENSG00000146904	EPHA1	7	143399284	143399392	Fibroblast.47XYY-Fibroblast.46XY	109	7	37.4769	Promoter (<=1kb)	Hyper	EPH receptor A1	ENSG00000146904.Promoter	Promoter	Fibroblast	no		68.9449	0.204637	0.3242	0.631207	0.527905	0.735094	not sig
ENSG00000146909	NOM1	7	156965836	156965999	Fibroblast.47XYY-Fibroblast.46XY	164	6	-34.854	Promoter (<=1kb)	Hypo	nucleolar protein with MIF4G domain 1	ENSG00000146909.Promoter	Promoter	Fibroblast	no		1435.75	-0.235469	0.163921	-1.43648	0.150866	0.354526	not sig
ENSG00000146950	SHROOM2	X	9912650	9912845	Fibroblast.47XYY-Fibroblast.46XY	196	12	-79.6561	Promoter (<=1kb)	Hypo	shroom family member 2	ENSG00000146950.Promoter	Promoter	Fibroblast	no	variable
ENSG00000146966	DENND2A	7	140568168	140568235	Fibroblast.47XYY-Fibroblast.46XY	68	9	47.2302	Intron (ENST00000275884/ENSG00000146966, intron 7 of 18)	Hyper	DENN domain containing 2A	ENSG00000146966.GeneBody	GeneBody	Fibroblast	no		156.431	2.66359	0.497373	5.35532	8.54044e-08	1.99665e-06	up
ENSG00000147117	ZNF157	X	47336537	47336608	Fibroblast.47XYY-Fibroblast.46XY	72	7	31.1106	Distal Intergenic	Hyper	zinc finger protein 157	ENSG00000147117.Intergenic	Intergenic	Fibroblast	no	variable
ENSG00000147206	NXF3	X	103118291	103118344	Fibroblast.47XYY-Fibroblast.46XY	54	5	26.7495	Distal Intergenic	Hyper	nuclear RNA export factor 3	ENSG00000147206.Intergenic	Intergenic	Fibroblast	no	variable
ENSG00000147324	MFHAS1	8	8891768	8891962	Fibroblast.47XYY-Fibroblast.46XY	195	11	-52.23	Promoter (1-2kb)	Hypo	multifunctional ROCO family signaling regulator 1	ENSG00000147324.Promoter	Promoter	Fibroblast	no		497.502	-0.332296	0.130848	-2.53956	0.0110992	0.0540993	not sig
ENSG00000147394	ZNF185	X	152919325	152919482	Fibroblast.47XYY-Fibroblast.46XY	158	5	22.124	Promoter (<=1kb)	Hyper	zinc finger protein 185 with LIM domain	ENSG00000147394.Promoter	Promoter	Fibroblast	no	inactive	382.463	0.10129	0.349191	0.29007	0.771763	0.887071	not sig
ENSG00000147432	CHRNB3	8	42708192	42708262	Fibroblast.47XYY-Fibroblast.46XY	71	9	40.7385	Intron (ENST00000289957/ENSG00000147432, intron 1 of 5)	Hyper	cholinergic receptor nicotinic beta 3 subunit	ENSG00000147432.GeneBody	GeneBody	Fibroblast	no
ENSG00000147434	CHRNA6	8	42786262	42786400	Fibroblast.47XYY-Fibroblast.46XY	139	10	51.4901	Intron (ENST00000533810/ENSG00000147434, intron 1 of 4)	Hyper	cholinergic receptor nicotinic alpha 6 subunit	ENSG00000147434.GeneBody	GeneBody	Fibroblast	no
ENSG00000147454	SLC25A37	8	23559232	23559334	Fibroblast.47XYY-Fibroblast.46XY	103	5	-23.9153	Intron (ENST00000417331/ENSG00000147454, intron 1 of 3)	Hypo	solute carrier family 25 member 37	ENSG00000147454.GeneBody	GeneBody	Fibroblast	no		2505.11	0.0560612	0.198286	0.282729	0.777384	0.890441	not sig
ENSG00000147485	PXDNL	8	51409350	51409462	Fibroblast.47XYY-Fibroblast.46XY	113	32	-182.022	Promoter (<=1kb)	Hypo	peroxidasin like	ENSG00000147485.Promoter	Promoter	Fibroblast	no
ENSG00000147573	TRIM55	8	66150826	66150884	Fibroblast.47XYY-Fibroblast.46XY	59	4	18.4222	Promoter (1-2kb)	Hyper	tripartite motif containing 55	ENSG00000147573.Promoter	Promoter	Fibroblast	no		332.162	6.46803	1.0901	5.93343	2.96662e-09	9.74777e-08	up
ENSG00000147789	ZNF7	8	144834018	144834072	Fibroblast.47XYY-Fibroblast.46XY	55	5	23.0051	Promoter (<=1kb)	Hyper	zinc finger protein 7	ENSG00000147789.Promoter	Promoter	Fibroblast	no		696.176	0.151894	0.149597	1.01535	0.309937	0.550953	not sig
ENSG00000148180	GSN	9	121320568	121320639	Fibroblast.47XYY-Fibroblast.46XY	72	4	20.4875	Intron (ENST00000373823/ENSG00000148180, intron 17 of 24)	Hyper	gelsolin	ENSG00000148180.GeneBody	GeneBody	Fibroblast	no		17967.3	-0.121413	0.170682	-0.711336	0.476876	0.696875	not sig
ENSG00000148204	CRB2	9	123317442	123317547	Fibroblast.47XYY-Fibroblast.46XY	106	12	55.8928	Distal Intergenic	Hyper	crumbs cell polarity complex component 2	ENSG00000148204.Intergenic	Intergenic	Fibroblast	no
ENSG00000148337	CIZ1	9	128192116	128192294	Fibroblast.47XYY-Fibroblast.46XY	179	16	95.0203	Promoter (<=1kb)	Hyper	CDKN1A interacting zinc finger protein 1	ENSG00000148337.Promoter	Promoter	Fibroblast	no		5514.07	-0.16744	0.12111	-1.38255	0.166803	0.378575	not sig
ENSG00000148339	SLC25A25	9	128070459	128070536	Fibroblast.47XYY-Fibroblast.46XY	78	9	45.9893	Promoter (2-3kb)	Hyper	solute carrier family 25 member 25	ENSG00000148339.Promoter	Promoter	Fibroblast	no		732.267	-0.0862156	0.119554	-0.721141	0.470823	0.691164	not sig
ENSG00000148341	SH3GLB2	9	129024289	129024357	Fibroblast.47XYY-Fibroblast.46XY	69	7	34.647	Intron (ENST00000372564/ENSG00000148341, intron 1 of 10)	Hyper	SH3 domain containing GRB2 like, endophilin B2	ENSG00000148341.GeneBody	GeneBody	Fibroblast	no		1641.89	-0.0178335	0.182972	-0.0974654	0.922357	0.962795	not sig
ENSG00000148343	MIGA2	9	129071355	129071456	Fibroblast.47XYY-Fibroblast.46XY	102	14	-68.139	Promoter (2-3kb)	Hypo	mitoguardin 2	ENSG00000148343.Promoter	Promoter	Fibroblast	no		1034.23	-0.131871	0.152169	-0.866612	0.386155	0.62295	not sig
ENSG00000148344	PTGES	9	129751569	129751737	Fibroblast.47XYY-Fibroblast.46XY	169	6	34.1417	Promoter (1-2kb)	Hyper	prostaglandin E synthase	ENSG00000148344.Promoter	Promoter	Fibroblast	no		622.738	-1.14442	0.221482	-5.1671	2.37757e-07	5.04908e-06	down
ENSG00000148408	CACNA1B	9	138075876	138077286	Fibroblast.47XYY-Fibroblast.46XY	1411	9	47.555	Promoter (<=1kb)	Hyper	calcium voltage-gated channel subunit alpha1 B	ENSG00000148408.Promoter	Promoter	Fibroblast	no
ENSG00000148426	PROSER2	10	11786272	11786382	Fibroblast.47XYY-Fibroblast.46XY	111	4	18.2028	Distal Intergenic	Hyper	proline and serine rich 2	ENSG00000148426.Intergenic	Intergenic	Fibroblast	no
ENSG00000148513	ANKRD30A	10	37123599	37123668	Fibroblast.47XYY-Fibroblast.46XY	70	9	44.0972	Promoter (2-3kb)	Hyper	ankyrin repeat domain 30A	ENSG00000148513.Promoter	Promoter	Fibroblast	no
ENSG00000148737	TCF7L2	10	113117667	113117832	Fibroblast.47XYY-Fibroblast.46XY	166	8	48.9058	Intron (ENST00000627217/ENSG00000148737, intron 5 of 13)	Hyper	transcription factor 7 like 2	ENSG00000148737.GeneBody	GeneBody	Fibroblast	no		1594.62	-0.832059	0.231896	-3.58808	0.000333126	0.00307496	down
ENSG00000148737	TCF7L2	10	113107464	113107599	Fibroblast.47XYY-Fibroblast.46XY	136	12	91.0758	Intron (ENST00000627217/ENSG00000148737, intron 5 of 13)	Hyper	transcription factor 7 like 2	ENSG00000148737.GeneBody	GeneBody	Fibroblast	no		1594.62	-0.832059	0.231896	-3.58808	0.000333126	0.00307496	down
ENSG00000148848	ADAM12	10	126198505	126198628	Fibroblast.47XYY-Fibroblast.46XY	124	5	-25.6543	Intron (ENST00000368679/ENSG00000148848, intron 3 of 22)	Hypo	ADAM metallopeptidase domain 12	ENSG00000148848.GeneBody	GeneBody	Fibroblast	no		14329.5	1.11536	0.137379	8.11881	4.7077e-16	4.53898e-14	up
ENSG00000149527	PLCH2	1	2501069	2501210	Fibroblast.47XYY-Fibroblast.46XY	142	9	63.4182	Promoter (2-3kb)	Hyper	phospholipase C eta 2	ENSG00000149527.Promoter	Promoter	Fibroblast	no		39.5621	2.24884	0.537027	4.18758	2.81947e-05	0.000357756	up
ENSG00000149534	MS4A2	11	60086588	60086715	Fibroblast.47XYY-Fibroblast.46XY	128	8	36.9071	Promoter (1-2kb)	Hyper	membrane spanning 4-domains A2	ENSG00000149534.Promoter	Promoter	Fibroblast	no
ENSG00000149636	DSN1	20	36774649	36774859	Fibroblast.47XYY-Fibroblast.46XY	211	22	118.447	Promoter (<=1kb)	Hyper	DSN1 component of MIS12 kinetochore complex	ENSG00000149636.Promoter	Promoter	Fibroblast	no		812.49	-0.398758	0.206529	-1.93076	0.053513	0.176185	not sig
ENSG00000149654	CDH22	20	46200259	46200650	Fibroblast.47XYY-Fibroblast.46XY	392	5	23.6174	Intron (ENST00000537909/ENSG00000149654, intron 7 of 11)	Hyper	cadherin 22	ENSG00000149654.GeneBody	GeneBody	Fibroblast	no
ENSG00000149654	CDH22	20	46196638	46196790	Fibroblast.47XYY-Fibroblast.46XY	153	4	25.5195	Intron (ENST00000537909/ENSG00000149654, intron 8 of 11)	Hyper	cadherin 22	ENSG00000149654.GeneBody	GeneBody	Fibroblast	no
ENSG00000149925	ALDOA	16	30067463	30067643	Fibroblast.47XYY-Fibroblast.46XY	181	24	117.508	Promoter (<=1kb)	Hyper	aldolase, fructose-bisphosphate A	ENSG00000149925.Promoter	Promoter	Fibroblast	no		687.47	-0.103416	0.299335	-0.345485	0.72973	0.861565	not sig
ENSG00000149927	DOC2A	16	30005294	30005426	Fibroblast.47XYY-Fibroblast.46XY	133	9	41.0471	Promoter (1-2kb)	Hyper	double C2 domain alpha	ENSG00000149927.Promoter	Promoter	Fibroblast	no
ENSG00000150907	FOXO1	13	40646725	40646889	Fibroblast.47XYY-Fibroblast.46XY	165	14	74.2783	Intron (ENST00000379561/ENSG00000150907, intron 1 of 2)	Hyper	forkhead box O1	ENSG00000150907.GeneBody	GeneBody	Fibroblast	no		145.386	-1.09315	0.398363	-2.74411	0.00606746	0.0337737	down
ENSG00000150907	FOXO1	13	40663995	40664100	Fibroblast.47XYY-Fibroblast.46XY	106	15	98.5982	Promoter (1-2kb)	Hyper	forkhead box O1	ENSG00000150907.Promoter	Promoter	Fibroblast	no		145.386	-1.09315	0.398363	-2.74411	0.00606746	0.0337737	down
ENSG00000150991	UBC	12	124909613	124909666	Fibroblast.47XYY-Fibroblast.46XY	54	7	36.503	Distal Intergenic	Hyper	ubiquitin C	ENSG00000150991.Intergenic	Intergenic	Fibroblast	no		29009.3	-0.187067	0.0732111	-2.55517	0.0106135	0.0524103	not sig
ENSG00000151117	TMEM86A	11	18683899	18684081	Fibroblast.47XYY-Fibroblast.46XY	183	4	20.8068	Distal Intergenic	Hyper	transmembrane protein 86A	ENSG00000151117.Intergenic	Intergenic	Fibroblast	no		98.3136	-0.219135	0.186682	-1.17384	0.240459	0.472793	not sig
ENSG00000151240	DIP2C	10	531985	532144	Fibroblast.47XYY-Fibroblast.46XY	160	7	36.6189	Intron (ENST00000280886/ENSG00000151240, intron 1 of 36)	Hyper	disco interacting protein 2 homolog C	ENSG00000151240.GeneBody	GeneBody	Fibroblast	no		3619.16	0.116337	0.132445	0.878374	0.379741	0.616794	not sig
ENSG00000151240	DIP2C	10	516188	516323	Fibroblast.47XYY-Fibroblast.46XY	136	4	21.7356	Intron (ENST00000280886/ENSG00000151240, intron 1 of 36)	Hyper	disco interacting protein 2 homolog C	ENSG00000151240.GeneBody	GeneBody	Fibroblast	no		3619.16	0.116337	0.132445	0.878374	0.379741	0.616794	not sig
ENSG00000151360	ALLC	2	3657985	3658091	Fibroblast.47XYY-Fibroblast.46XY	107	6	27.5841	Promoter (<=1kb)	Hyper	allantoicase	ENSG00000151360.Promoter	Promoter	Fibroblast	no
ENSG00000151640	DPYSL4	10	132201273	132201365	Fibroblast.47XYY-Fibroblast.46XY	93	18	-80.037	Promoter (2-3kb)	Hypo	dihydropyrimidinase like 4	ENSG00000151640.Promoter	Promoter	Fibroblast	no		471.42	0.47075	0.301656	1.56055	0.11863	0.303738	not sig
ENSG00000151693	ASAP2	2	9378892	9379071	Fibroblast.47XYY-Fibroblast.46XY	180	13	68.7246	Exon (ENST00000315273/ENSG00000151693, exon 19 of 27)	Hyper	ArfGAP with SH3 domain, ankyrin repeat and PH domain 2	ENSG00000151693.GeneBody	GeneBody	Fibroblast	no		1902.82	-0.441385	0.105652	-4.17773	2.94428e-05	0.000371152	not sig
ENSG00000151773	CCDC122	13	43830540	43830690	Fibroblast.47XYY-Fibroblast.46XY	151	7	43.3547	Intron (ENST00000470137/ENSG00000151773, intron 3 of 3)	Hyper	coiled-coil domain containing 122	ENSG00000151773.GeneBody	GeneBody	Fibroblast	no		117.232	-0.247327	0.265737	-0.930719	0.351999	0.591396	not sig
ENSG00000151846	PABPC3	13	25078566	25078654	Fibroblast.47XYY-Fibroblast.46XY	89	8	39.9686	Distal Intergenic	Hyper	poly(A) binding protein cytoplasmic 3	ENSG00000151846.Intergenic	Intergenic	Fibroblast	no
ENSG00000151876	FBXO4	5	41926294	41926429	Fibroblast.47XYY-Fibroblast.46XY	136	16	104.691	Promoter (<=1kb)	Hyper	F-box protein 4	ENSG00000151876.Promoter	Promoter	Fibroblast	no		430.833	-0.270572	0.136588	-1.98094	0.0475982	0.162001	not sig
ENSG00000152049	KCNE4	2	223055053	223055153	Fibroblast.47XYY-Fibroblast.46XY	101	5	28.5754	Promoter (2-3kb)	Hyper	potassium voltage-gated channel subfamily E regulatory subunit 4	ENSG00000152049.Promoter	Promoter	Fibroblast	no		3484.46	-1.12007	0.428682	-2.61283	0.00897947	0.0458661	down
ENSG00000152213	ARL11	13	49628741	49628857	Fibroblast.47XYY-Fibroblast.46XY	117	8	39.1065	Promoter (<=1kb)	Hyper	ADP ribosylation factor like GTPase 11	ENSG00000152213.Promoter	Promoter	Fibroblast	no
ENSG00000152223	EPG5	18	45898080	45898242	Fibroblast.47XYY-Fibroblast.46XY	163	6	31.5889	Intron (ENST00000282041/ENSG00000152223, intron 27 of 43)	Hyper	ectopic P-granules 5 autophagy tethering factor	ENSG00000152223.GeneBody	GeneBody	Fibroblast	no		4936.13	-0.359254	0.234086	-1.53471	0.124855	0.313061	not sig
ENSG00000152284	TCF7L1	2	85299407	85299499	Fibroblast.47XYY-Fibroblast.46XY	93	4	17.9024	Intron (ENST00000282111/ENSG00000152284, intron 4 of 11)	Hyper	transcription factor 7 like 1	ENSG00000152284.GeneBody	GeneBody	Fibroblast	no		1241.11	-0.217949	0.259137	-0.841058	0.400315	0.636548	not sig
ENSG00000152292	SH2D6	2	85429482	85429611	Fibroblast.47XYY-Fibroblast.46XY	130	8	66.4344	Promoter (<=1kb)	Hyper	SH2 domain containing 6	ENSG00000152292.Promoter	Promoter	Fibroblast	no
ENSG00000152404	CWF19L2	11	107498125	107498261	Fibroblast.47XYY-Fibroblast.46XY	137	4	20.5886	Distal Intergenic	Hyper	CWF19 like cell cycle control factor 2	ENSG00000152404.Intergenic	Intergenic	Fibroblast	no		462.497	-0.2489	0.200375	-1.24217	0.214173	0.441826	not sig
ENSG00000152484	USP12	13	27089184	27089313	Fibroblast.47XYY-Fibroblast.46XY	130	4	19.3748	Intron (ENST00000282344/ENSG00000152484, intron 6 of 8)	Hyper	ubiquitin specific peptidase 12	ENSG00000152484.GeneBody	GeneBody	Fibroblast	no		1646.26	-0.264114	0.163059	-1.61974	0.105287	0.282154	not sig
ENSG00000152580	IGSF10	3	151424341	151424511	Fibroblast.47XYY-Fibroblast.46XY	171	12	67.6084	Intron (ENST00000474524/ENSG00000144893, intron 41 of 42)	Hyper	immunoglobulin superfamily member 10	ENSG00000152580.GeneBody	GeneBody	Fibroblast	no		234.727	0.362334	0.40806	0.887942	0.374572	0.612092	not sig
ENSG00000152767	FARP1	13	98443876	98443999	Fibroblast.47XYY-Fibroblast.46XY	124	12	51.4543	Promoter (1-2kb)	Hyper	FERM, ARH/RhoGEF and pleckstrin domain protein 1	ENSG00000152767.Promoter	Promoter	Fibroblast	no		5997.15	-0.392141	0.124508	-3.14953	0.00163533	0.0117016	not sig
ENSG00000152779	SLC16A12	10	89534196	89534367	Fibroblast.47XYY-Fibroblast.46XY	172	13	-93.4335	Promoter (1-2kb)	Hypo	solute carrier family 16 member 12	ENSG00000152779.Promoter	Promoter	Fibroblast	no
ENSG00000152952	PLOD2	3	146163497	146163599	Fibroblast.47XYY-Fibroblast.46XY	103	4	20.8136	Promoter (<=1kb)	Hyper	procollagen-lysine,2-oxoglutarate 5-dioxygenase 2	ENSG00000152952.Promoter	Promoter	Fibroblast	no		15636.9	0.772629	0.237684	3.25065	0.0011514	0.00877251	up
ENSG00000152977	ZIC1	3	147424365	147424453	Fibroblast.47XYY-Fibroblast.46XY	89	12	-56.8112	Intron (ENST00000472523/ENSG00000152977, intron 1 of 1)	Hypo	Zic family member 1	ENSG00000152977.GeneBody	GeneBody	Fibroblast	no		676.823	-0.0423184	0.258998	-0.163393	0.870209	0.936194	not sig
ENSG00000152977	ZIC1	3	147413395	147413506	Fibroblast.47XYY-Fibroblast.46XY	112	14	-61.657	Exon (ENST00000488404/ENSG00000152977, exon 3 of 3)	Hypo	Zic family member 1	ENSG00000152977.GeneBody	GeneBody	Fibroblast	no		676.823	-0.0423184	0.258998	-0.163393	0.870209	0.936194	not sig
ENSG00000152977	ZIC1	3	147423474	147424198	Fibroblast.47XYY-Fibroblast.46XY	725	19	-101.95	Promoter (2-3kb)	Hypo	Zic family member 1	ENSG00000152977.Promoter	Promoter	Fibroblast	no		676.823	-0.0423184	0.258998	-0.163393	0.870209	0.936194	not sig
ENSG00000153071	DAB2	5	39452337	39452450	Fibroblast.47XYY-Fibroblast.46XY	114	8	-36.9755	Intron (ENST00000511792/ENSG00000153071, intron 1 of 2)	Hypo	DAB adaptor protein 2	ENSG00000153071.GeneBody	GeneBody	Fibroblast	no		23829.3	0.171872	0.12922	1.33007	0.183495	0.401071	not sig
ENSG00000153093	ACOXL	2	110787255	110787309	Fibroblast.47XYY-Fibroblast.46XY	55	7	39.903	Intron (ENST00000389811/ENSG00000153093, intron 3 of 18)	Hyper	acyl-CoA oxidase like	ENSG00000153093.GeneBody	GeneBody	Fibroblast	no
ENSG00000153179	RASSF3	12	64505491	64505627	Fibroblast.47XYY-Fibroblast.46XY	137	8	60.6495	Promoter (1-2kb)	Hyper	Ras association domain family member 3	ENSG00000153179.Promoter	Promoter	Fibroblast	no		1339.38	-0.23777	0.213014	-1.11622	0.264329	0.500516	not sig
ENSG00000153250	RBMS1	2	160648312	160648402	Fibroblast.47XYY-Fibroblast.46XY	91	12	-57.0517	Distal Intergenic	Hypo	RNA binding motif single stranded interacting protein 1	ENSG00000153250.Intergenic	Intergenic	Fibroblast	no		7896.91	0.0661491	0.204454	0.32354	0.746286	0.872032	not sig
ENSG00000153303	FRMD1	6	168054934	168055182	Fibroblast.47XYY-Fibroblast.46XY	249	13	88.7865	3' UTR	Hyper	FERM domain containing 1	ENSG00000153303.GeneBody	GeneBody	Fibroblast	no
ENSG00000153317	ASAP1	8	130491515	130491615	Fibroblast.47XYY-Fibroblast.46XY	101	4	18.744	Distal Intergenic	Hyper	ArfGAP with SH3 domain, ankyrin repeat and PH domain 1	ENSG00000153317.Intergenic	Intergenic	Fibroblast	no		8641.93	-0.207086	0.208733	-0.992111	0.321143	0.561315	not sig
ENSG00000153395	LPCAT1	5	1488956	1489077	Fibroblast.47XYY-Fibroblast.46XY	122	6	29.0424	Intron (ENST00000475622/ENSG00000153395, intron 4 of 16)	Hyper	lysophosphatidylcholine acyltransferase 1	ENSG00000153395.GeneBody	GeneBody	Fibroblast	no		2737.46	-0.0480684	0.189709	-0.25338	0.799975	0.900841	not sig
ENSG00000153395	LPCAT1	5	1500743	1500828	Fibroblast.47XYY-Fibroblast.46XY	86	6	27.652	Intron (ENST00000475622/ENSG00000153395, intron 2 of 16)	Hyper	lysophosphatidylcholine acyltransferase 1	ENSG00000153395.GeneBody	GeneBody	Fibroblast	no		2737.46	-0.0480684	0.189709	-0.25338	0.799975	0.900841	not sig
ENSG00000153443	UBALD1	16	4615384	4615474	Fibroblast.47XYY-Fibroblast.46XY	91	9	36.3224	Promoter (<=1kb)	Hyper	UBA like domain containing 1	ENSG00000153443.Promoter	Promoter	Fibroblast	no		893.046	0.0500297	0.217415	0.230112	0.818005	0.908669	not sig
ENSG00000153446	C16orf89	16	5065937	5066037	Fibroblast.47XYY-Fibroblast.46XY	101	4	17.738	Promoter (<=1kb)	Hyper	chromosome 16 open reading frame 89	ENSG00000153446.Promoter	Promoter	Fibroblast	no
ENSG00000153495	TEX29	13	111413979	111414093	Fibroblast.47XYY-Fibroblast.46XY	115	12	66.5284	Distal Intergenic	Hyper	testis expressed 29	ENSG00000153495.Intergenic	Intergenic	Fibroblast	no
ENSG00000153707	PTPRD	9	8331666	8331760	Fibroblast.47XYY-Fibroblast.46XY	95	6	30.6847	Exon (ENST00000381196/ENSG00000153707, exon 41 of 43)	Hyper	protein tyrosine phosphatase receptor type D	ENSG00000153707.GeneBody	GeneBody	Fibroblast	no		48.5456	2.19525	1.49557	1.46783	0.142149	0.341205	not sig
ENSG00000153707	PTPRD	9	8447654	8449537	Fibroblast.47XYY-Fibroblast.46XY	1884	5	23.2793	Intron (ENST00000381196/ENSG00000153707, intron 31 of 42)	Hyper	protein tyrosine phosphatase receptor type D	ENSG00000153707.GeneBody	GeneBody	Fibroblast	no		48.5456	2.19525	1.49557	1.46783	0.142149	0.341205	not sig
ENSG00000153707	PTPRD	9	8256436	8256571	Fibroblast.47XYY-Fibroblast.46XY	136	12	70.0761	Distal Intergenic	Hyper	protein tyrosine phosphatase receptor type D	ENSG00000153707.Intergenic	Intergenic	Fibroblast	no		48.5456	2.19525	1.49557	1.46783	0.142149	0.341205	not sig
ENSG00000153930	ANKFN1	17	56253620	56253821	Fibroblast.47XYY-Fibroblast.46XY	202	11	54.7041	Intron (ENST00000635860/ENSG00000153930, intron 5 of 12)	Hyper	ankyrin repeat and fibronectin type III domain containing 1	ENSG00000153930.GeneBody	GeneBody	Fibroblast	no
ENSG00000153944	MSI2	17	57378541	57378692	Fibroblast.47XYY-Fibroblast.46XY	152	8	45.4716	Intron (ENST00000416426/ENSG00000153944, intron 5 of 13)	Hyper	musashi RNA binding protein 2	ENSG00000153944.GeneBody	GeneBody	Fibroblast	no		936.353	1.03968	0.166477	6.24519	4.23275e-10	1.63481e-08	up
ENSG00000153944	MSI2	17	57313006	57313140	Fibroblast.47XYY-Fibroblast.46XY	135	8	36.6238	Intron (ENST00000416426/ENSG00000153944, intron 5 of 13)	Hyper	musashi RNA binding protein 2	ENSG00000153944.GeneBody	GeneBody	Fibroblast	no		936.353	1.03968	0.166477	6.24519	4.23275e-10	1.63481e-08	up
ENSG00000153944	MSI2	17	57406838	57406954	Fibroblast.47XYY-Fibroblast.46XY	117	4	25.3033	Promoter (<=1kb)	Hyper	musashi RNA binding protein 2	ENSG00000153944.Promoter	Promoter	Fibroblast	no		936.353	1.03968	0.166477	6.24519	4.23275e-10	1.63481e-08	up
ENSG00000153989	NUS1	6	117750670	117750801	Fibroblast.47XYY-Fibroblast.46XY	132	17	70.6857	Distal Intergenic	Hyper	NUS1 dehydrodolichyl diphosphate synthase subunit	ENSG00000153989.Intergenic	Intergenic	Fibroblast	no		2587.98	-0.0684658	0.179771	-0.38085	0.703314	0.846245	not sig
ENSG00000154025	SLC5A10	17	18952240	18952303	Fibroblast.47XYY-Fibroblast.46XY	64	8	32.9908	Promoter (<=1kb)	Hyper	solute carrier family 5 member 10	ENSG00000154025.Promoter	Promoter	Fibroblast	no
ENSG00000154102	C16orf74	16	85705915	85706023	Fibroblast.47XYY-Fibroblast.46XY	109	7	42.1783	Intron (ENST00000655120/ENSG00000287125, intron 2 of 2)	Hyper	chromosome 16 open reading frame 74	ENSG00000154102.GeneBody	GeneBody	Fibroblast	no		42.6567	-0.198284	0.360657	-0.549787	0.582466	0.771649	not sig
ENSG00000154102	C16orf74	16	85752503	85752725	Fibroblast.47XYY-Fibroblast.46XY	223	15	-83.9106	Promoter (1-2kb)	Hypo	chromosome 16 open reading frame 74	ENSG00000154102.Promoter	Promoter	Fibroblast	no		42.6567	-0.198284	0.360657	-0.549787	0.582466	0.771649	not sig
ENSG00000154118	JPH3	16	87648547	87648613	Fibroblast.47XYY-Fibroblast.46XY	67	4	21.9721	Intron (ENST00000537256/ENSG00000154118, intron 2 of 5)	Hyper	junctophilin 3	ENSG00000154118.GeneBody	GeneBody	Fibroblast	no
ENSG00000154237	LRRK1	15	100973339	100973507	Fibroblast.47XYY-Fibroblast.46XY	169	34	-180.751	Intron (ENST00000527698/ENSG00000154237, intron 2 of 2)	Hypo	leucine rich repeat kinase 1	ENSG00000154237.GeneBody	GeneBody	Fibroblast	no		1695.49	-0.487391	0.136425	-3.5726	0.000353458	0.00323326	not sig
ENSG00000154330	PGM5	9	68479485	68479536	Fibroblast.47XYY-Fibroblast.46XY	52	4	18.8446	Exon (ENST00000396396/ENSG00000154330, exon 8 of 11)	Hyper	phosphoglucomutase 5	ENSG00000154330.GeneBody	GeneBody	Fibroblast	no
ENSG00000154358	OBSCN	1	228374742	228374965	Fibroblast.47XYY-Fibroblast.46XY	224	15	77.9207	Promoter (<=1kb)	Hyper	obscurin, cytoskeletal calmodulin and titin-interacting RhoGEF	ENSG00000154358.Promoter	Promoter	Fibroblast	no		257.651	0.953742	0.1738	5.48758	4.0748e-08	1.04716e-06	up
ENSG00000154358	OBSCN	1	228356837	228356992	Fibroblast.47XYY-Fibroblast.46XY	156	11	58.2216	Intron (ENST00000284548/ENSG00000154358, intron 80 of 80)	Hyper	obscurin, cytoskeletal calmodulin and titin-interacting RhoGEF	ENSG00000154358.GeneBody	GeneBody	Fibroblast	no		257.651	0.953742	0.1738	5.48758	4.0748e-08	1.04716e-06	up
ENSG00000154511	DIPK1A	1	92863817	92863913	Fibroblast.47XYY-Fibroblast.46XY	97	8	35.9452	Intron (ENST00000615519/ENSG00000154511, intron 2 of 4)	Hyper	divergent protein kinase domain 1A	ENSG00000154511.GeneBody	GeneBody	Fibroblast	no		2192.43	-0.23213	0.219788	-1.05615	0.290898	0.530672	not sig
ENSG00000154556	SORBS2	4	185953853	185953953	Fibroblast.47XYY-Fibroblast.46XY	101	4	21.3894	Promoter (2-3kb)	Hyper	sorbin and SH3 domain containing 2	ENSG00000154556.Promoter	Promoter	Fibroblast	no		1214.25	-1.02632	0.427064	-2.4032	0.0162524	0.072333	not sig
ENSG00000154678	PDE1C	7	32259919	32260038	Fibroblast.47XYY-Fibroblast.46XY	120	4	22.7828	Intron (ENST00000396193/ENSG00000154678, intron 1 of 18)	Hyper	phosphodiesterase 1C	ENSG00000154678.GeneBody	GeneBody	Fibroblast	no		2049.76	-0.813677	0.2068	-3.9346	8.33339e-05	0.000923455	down
ENSG00000154710	RABGEF1	7	66700269	66700479	Fibroblast.47XYY-Fibroblast.46XY	211	10	55.6843	Intron (ENST00000503687/ENSG00000284461, intron 3 of 12)	Hyper	RAB guanine nucleotide exchange factor 1	ENSG00000154710.GeneBody	GeneBody	Fibroblast	no		161.944	0.0408251	0.156301	0.261196	0.793942	0.897928	not sig
ENSG00000154874	CCDC144BP	17	18625039	18625306	Fibroblast.47XYY-Fibroblast.46XY	268	21	138.88	Promoter (<=1kb)	Hyper	coiled-coil domain containing 144B, pseudogene	ENSG00000154874.Promoter	Promoter	Fibroblast	no		291.674	-2.12451	0.272344	-7.80086	6.14876e-15	4.87155e-13	down
ENSG00000154914	USP43	17	9673227	9673365	Fibroblast.47XYY-Fibroblast.46XY	139	9	46.8338	Intron (ENST00000570827/ENSG00000154914, intron 3 of 14)	Hyper	ubiquitin specific peptidase 43	ENSG00000154914.GeneBody	GeneBody	Fibroblast	no		57.2486	0.920538	0.388489	2.36953	0.0178106	0.0776181	not sig
ENSG00000154928	EPHB1	3	134872852	134872971	Fibroblast.47XYY-Fibroblast.46XY	120	6	33.9863	Intron (ENST00000460895/ENSG00000154928, intron 2 of 3)	Hyper	EPH receptor B1	ENSG00000154928.GeneBody	GeneBody	Fibroblast	no		201.706	-0.235907	0.229879	-1.02623	0.304785	0.545515	not sig
ENSG00000155052	CNTNAP5	2	124391676	124391812	Fibroblast.47XYY-Fibroblast.46XY	137	20	103.14	Intron (ENST00000431078/ENSG00000155052, intron 3 of 23)	Hyper	contactin associated protein family member 5	ENSG00000155052.GeneBody	GeneBody	Fibroblast	no
ENSG00000155093	PTPRN2	7	158585048	158585110	Fibroblast.47XYY-Fibroblast.46XY	63	6	29.2413	Promoter (2-3kb)	Hyper	protein tyrosine phosphatase receptor type N2	ENSG00000155093.Promoter	Promoter	Fibroblast	no
ENSG00000155093	PTPRN2	7	158234922	158234982	Fibroblast.47XYY-Fibroblast.46XY	61	4	20.1792	Intron (ENST00000389413/ENSG00000155093, intron 3 of 21)	Hyper	protein tyrosine phosphatase receptor type N2	ENSG00000155093.GeneBody	GeneBody	Fibroblast	no
ENSG00000155093	PTPRN2	7	157658913	157659008	Fibroblast.47XYY-Fibroblast.46XY	96	8	36.9623	Intron (ENST00000389413/ENSG00000155093, intron 12 of 21)	Hyper	protein tyrosine phosphatase receptor type N2	ENSG00000155093.GeneBody	GeneBody	Fibroblast	no
ENSG00000155254	MARVELD1	10	97701783	97701895	Fibroblast.47XYY-Fibroblast.46XY	113	4	24.0415	Distal Intergenic	Hyper	MARVEL domain containing 1	ENSG00000155254.Intergenic	Intergenic	Fibroblast	no		8742.72	-0.278968	0.0455122	-6.12953	8.81391e-10	3.19843e-08	not sig
ENSG00000155508	CNOT8	5	154875076	154875212	Fibroblast.47XYY-Fibroblast.46XY	137	8	48.8928	Intron (ENST00000523698/ENSG00000155508, intron 4 of 4)	Hyper	CCR4-NOT transcription complex subunit 8	ENSG00000155508.GeneBody	GeneBody	Fibroblast	no		2069.92	-0.108232	0.161753	-0.669116	0.503421	0.717412	not sig
ENSG00000155530	LRGUK	7	134135815	134135951	Fibroblast.47XYY-Fibroblast.46XY	137	18	103.263	Intron (ENST00000645682/ENSG00000155530, intron 1 of 15)	Hyper	leucine rich repeats and guanylate kinase domain containing	ENSG00000155530.GeneBody	GeneBody	Fibroblast	no
ENSG00000155719	OTOA	16	21661537	21661690	Fibroblast.47XYY-Fibroblast.46XY	154	13	73.5595	Promoter (2-3kb)	Hyper	otoancorin	ENSG00000155719.Promoter	Promoter	Fibroblast	no
ENSG00000155749	FLACC1	2	201284282	201284402	Fibroblast.47XYY-Fibroblast.46XY	121	6	-47.3677	Intron (ENST00000392263/ENSG00000064012, intron 7 of 8)	Hypo	flagellum associated containing coiled-coil domains 1	ENSG00000155749.GeneBody	GeneBody	Fibroblast	no
ENSG00000155755	TMEM237	2	201641151	201641287	Fibroblast.47XYY-Fibroblast.46XY	137	8	39.7055	Promoter (1-2kb)	Hyper	transmembrane protein 237	ENSG00000155755.Promoter	Promoter	Fibroblast	no		2095.18	0.410178	0.18984	2.16065	0.0307223	0.117151	not sig
ENSG00000155849	ELMO1	7	37179497	37179572	Fibroblast.47XYY-Fibroblast.46XY	76	11	49.9062	Intron (ENST00000310758/ENSG00000155849, intron 13 of 21)	Hyper	engulfment and cell motility 1	ENSG00000155849.GeneBody	GeneBody	Fibroblast	no
ENSG00000155959	VBP1	X	155174053	155174157	Fibroblast.47XYY-Fibroblast.46XY	105	13	67.3298	Distal Intergenic	Hyper	VHL binding protein 1	ENSG00000155959.Intergenic	Intergenic	Fibroblast	no	inactive	1674.17	-0.163657	0.195431	-0.837415	0.40236	0.638334	not sig
ENSG00000156011	PSD3	8	18692946	18693055	Fibroblast.47XYY-Fibroblast.46XY	110	4	-19.7782	Intron (ENST00000440756/ENSG00000156011, intron 9 of 15)	Hypo	pleckstrin and Sec7 domain containing 3	ENSG00000156011.GeneBody	GeneBody	Fibroblast	no		4151.47	0.657031	0.140697	4.66983	3.01451e-06	4.97734e-05	up
ENSG00000156127	BATF	14	75478530	75478666	Fibroblast.47XYY-Fibroblast.46XY	137	8	61.1538	Distal Intergenic	Hyper	basic leucine zipper ATF-like transcription factor	ENSG00000156127.Intergenic	Intergenic	Fibroblast	no
ENSG00000156150	ALX3	1	110068276	110069090	Fibroblast.47XYY-Fibroblast.46XY	815	63	-319.811	Promoter (1-2kb)	Hypo	ALX homeobox 3	ENSG00000156150.Promoter	Promoter	Fibroblast	no		20.9588	1.47037	1.39126	1.05687	0.290572	0.530426	not sig
ENSG00000156381	ANKRD9	14	102519218	102519324	Fibroblast.47XYY-Fibroblast.46XY	107	5	23.9942	Distal Intergenic	Hyper	ankyrin repeat domain 9	ENSG00000156381.Intergenic	Intergenic	Fibroblast	no		543.094	-0.561542	0.182883	-3.07049	0.00213705	0.0146034	not sig
ENSG00000156467	UQCRB	8	96197319	96197426	Fibroblast.47XYY-Fibroblast.46XY	108	7	31.8739	Distal Intergenic	Hyper	ubiquinol-cytochrome c reductase binding protein	ENSG00000156467.Intergenic	Intergenic	Fibroblast	no		3839.41	0.10412	0.162966	0.638906	0.522884	0.732175	not sig
ENSG00000156510	HKDC1	10	69241293	69241410	Fibroblast.47XYY-Fibroblast.46XY	118	7	31.8198	Intron (ENST00000354624/ENSG00000156510, intron 6 of 17)	Hyper	hexokinase domain containing 1	ENSG00000156510.GeneBody	GeneBody	Fibroblast	no
ENSG00000156515	HK1	10	69362717	69362841	Fibroblast.47XYY-Fibroblast.46XY	125	13	82.8732	Intron (ENST00000436817/ENSG00000156515, intron 6 of 20)	Hyper	hexokinase 1	ENSG00000156515.GeneBody	GeneBody	Fibroblast	no		9647.39	-0.423206	0.0982213	-4.3087	1.64217e-05	0.000224085	not sig
ENSG00000156575	PRG3	11	57385377	57385508	Fibroblast.47XYY-Fibroblast.46XY	132	10	44.3977	Distal Intergenic	Hyper	proteoglycan 3, pro eosinophil major basic protein 2	ENSG00000156575.Intergenic	Intergenic	Fibroblast	no
ENSG00000156642	NPTN	15	73649145	73649272	Fibroblast.47XYY-Fibroblast.46XY	128	4	19.4794	Distal Intergenic	Hyper	neuroplastin	ENSG00000156642.Intergenic	Intergenic	Fibroblast	no		10790.5	-0.00375985	0.218746	-0.0171882	0.986286	0.992762	not sig
ENSG00000156886	ITGAD	16	31424817	31424894	Fibroblast.47XYY-Fibroblast.46XY	78	5	25.4666	Promoter (<=1kb)	Hyper	integrin subunit alpha D	ENSG00000156886.Promoter	Promoter	Fibroblast	no
ENSG00000156990	RPUSD3	3	9842983	9843080	Fibroblast.47XYY-Fibroblast.46XY	98	11	48.4421	Promoter (<=1kb)	Hyper	RNA pseudouridine synthase D3	ENSG00000156990.Promoter	Promoter	Fibroblast	no		833.356	-0.133708	0.124705	-1.07219	0.283634	0.522698	not sig
ENSG00000157005	SST	3	187609255	187609362	Fibroblast.47XYY-Fibroblast.46XY	108	5	22.9958	Distal Intergenic	Hyper	somatostatin	ENSG00000157005.Intergenic	Intergenic	Fibroblast	no
ENSG00000157045	NTAN1	16	15045250	15045338	Fibroblast.47XYY-Fibroblast.46XY	89	11	48.7595	Promoter (<=1kb)	Hyper	N-terminal asparagine amidase	ENSG00000157045.Promoter	Promoter	Fibroblast	no		1190.49	-0.0707748	0.0945356	-0.748658	0.454064	0.679229	not sig
ENSG00000157087	ATP2B2	3	10505020	10505146	Fibroblast.47XYY-Fibroblast.46XY	127	4	19.942	Promoter (<=1kb)	Hyper	ATPase plasma membrane Ca2+ transporting 2	ENSG00000157087.Promoter	Promoter	Fibroblast	no
ENSG00000157211	CDCP2	1	54153648	54153731	Fibroblast.47XYY-Fibroblast.46XY	84	9	36.5504	Promoter (<=1kb)	Hyper	CUB domain containing protein 2	ENSG00000157211.Promoter	Promoter	Fibroblast	no
ENSG00000157219	HTR5A	7	155067554	155067634	Fibroblast.47XYY-Fibroblast.46XY	81	5	24.2694	Promoter (2-3kb)	Hyper	5-hydroxytryptamine receptor 5A	ENSG00000157219.Promoter	Promoter	Fibroblast	no
ENSG00000157350	ST3GAL2	16	70432963	70433020	Fibroblast.47XYY-Fibroblast.46XY	58	7	30.9338	Intron (ENST00000342907/ENSG00000157350, intron 1 of 6)	Hyper	ST3 beta-galactoside alpha-2,3-sialyltransferase 2	ENSG00000157350.GeneBody	GeneBody	Fibroblast	no		2122.14	0.263516	0.173549	1.51839	0.128915	0.319792	not sig
ENSG00000157502	PWWP3B	X	106186297	106186414	Fibroblast.47XYY-Fibroblast.46XY	118	4	22.0052	Intron (ENST00000337685/ENSG00000157502, intron 3 of 4)	Hyper	PWWP domain containing 3B	ENSG00000157502.GeneBody	GeneBody	Fibroblast	no	inactive
ENSG00000157538	VPS26C	21	37291067	37291161	Fibroblast.47XYY-Fibroblast.46XY	95	7	32.0964	Distal Intergenic	Hyper	VPS26 endosomal protein sorting factor C	ENSG00000157538.Intergenic	Intergenic	Fibroblast	no		3200.57	-0.251043	0.202266	-1.24115	0.21455	0.442051	not sig
ENSG00000157570	TSPAN18	11	44804195	44804306	Fibroblast.47XYY-Fibroblast.46XY	112	4	28.9801	Intron (ENST00000533786/ENSG00000157570, intron 2 of 6)	Hyper	tetraspanin 18	ENSG00000157570.GeneBody	GeneBody	Fibroblast	no		2944.59	0.26826	0.339988	0.789027	0.430096	0.661313	not sig
ENSG00000157613	CREB3L1	11	46323283	46323565	Fibroblast.47XYY-Fibroblast.46XY	283	10	-49.2132	Distal Intergenic	Hypo	cAMP responsive element binding protein 3 like 1	ENSG00000157613.Intergenic	Intergenic	Fibroblast	no		14974.8	0.448677	0.173415	2.5873	0.00967308	0.0486634	not sig
ENSG00000157617	C2CD2	21	41923155	41923288	Fibroblast.47XYY-Fibroblast.46XY	134	15	68.7303	Intron (ENST00000329623/ENSG00000157617, intron 1 of 12)	Hyper	C2 calcium dependent domain containing 2	ENSG00000157617.GeneBody	GeneBody	Fibroblast	no		1935.54	-0.530706	0.145719	-3.642	0.000270531	0.00256898	not sig
ENSG00000157703	SVOPL	7	138680738	138680874	Fibroblast.47XYY-Fibroblast.46XY	137	14	66.8603	Promoter (1-2kb)	Hyper	SVOP like	ENSG00000157703.Promoter	Promoter	Fibroblast	no
ENSG00000157833	GAREM2	2	26184512	26184698	Fibroblast.47XYY-Fibroblast.46XY	187	27	-86.7121	Promoter (<=1kb)	Hypo	GRB2 associated regulator of MAPK1 subtype 2	ENSG00000157833.Promoter	Promoter	Fibroblast	no		403.198	2.14669	0.604182	3.55305	0.000380794	0.00345461	up
ENSG00000157833	GAREM2	2	26178935	26179027	Fibroblast.47XYY-Fibroblast.46XY	93	18	-94.7753	Promoter (1-2kb)	Hypo	GRB2 associated regulator of MAPK1 subtype 2	ENSG00000157833.Promoter	Promoter	Fibroblast	no		403.198	2.14669	0.604182	3.55305	0.000380794	0.00345461	up
ENSG00000157833	GAREM2	2	26185123	26185175	Fibroblast.47XYY-Fibroblast.46XY	53	10	-47.0135	Promoter (<=1kb)	Hypo	GRB2 associated regulator of MAPK1 subtype 2	ENSG00000157833.Promoter	Promoter	Fibroblast	no		403.198	2.14669	0.604182	3.55305	0.000380794	0.00345461	up
ENSG00000157881	PANK4	1	2527964	2528044	Fibroblast.47XYY-Fibroblast.46XY	81	9	40.3462	Promoter (1-2kb)	Hyper	pantothenate kinase 4 (inactive)	ENSG00000157881.Promoter	Promoter	Fibroblast	no		700.642	0.159631	0.148677	1.07368	0.282967	0.521954	not sig
ENSG00000157884	CIB4	2	26649669	26649773	Fibroblast.47XYY-Fibroblast.46XY	105	5	34.1684	Distal Intergenic	Hyper	calcium and integrin binding family member 4	ENSG00000157884.Intergenic	Intergenic	Fibroblast	no
ENSG00000157933	SKI	1	2291431	2291567	Fibroblast.47XYY-Fibroblast.46XY	137	8	49.2205	Intron (ENST00000378536/ENSG00000157933, intron 1 of 6)	Hyper	SKI proto-oncogene	ENSG00000157933.GeneBody	GeneBody	Fibroblast	no		7044.19	-0.186357	0.171389	-1.08733	0.276891	0.515497	not sig
ENSG00000157954	WIPI2	7	5248418	5248480	Fibroblast.47XYY-Fibroblast.46XY	63	6	28.7535	Distal Intergenic	Hyper	WD repeat domain, phosphoinositide interacting 2	ENSG00000157954.Intergenic	Intergenic	Fibroblast	no		3263.07	0.067945	0.0857955	0.791941	0.428395	0.660324	not sig
ENSG00000157985	AGAP1	2	235635715	235636037	Fibroblast.47XYY-Fibroblast.46XY	323	14	85.6363	Intron (ENST00000304032/ENSG00000157985, intron 1 of 17)	Hyper	ArfGAP with GTPase domain, ankyrin repeat and PH domain 1	ENSG00000157985.GeneBody	GeneBody	Fibroblast	no		1364.3	-0.0145494	0.0849217	-0.171327	0.863967	0.933203	not sig
ENSG00000158113	LRRC43	12	122190588	122190642	Fibroblast.47XYY-Fibroblast.46XY	55	7	30.3579	Intron (ENST00000537729/ENSG00000158113, intron 5 of 5)	Hyper	leucine rich repeat containing 43	ENSG00000158113.GeneBody	GeneBody	Fibroblast	no
ENSG00000158122	PRXL2C	9	96646950	96647085	Fibroblast.47XYY-Fibroblast.46XY	136	9	41.2869	Intron (ENST00000411939/ENSG00000158122, intron 3 of 3)	Hyper	peroxiredoxin like 2C	ENSG00000158122.GeneBody	GeneBody	Fibroblast	no		906.257	-0.816324	0.244877	-3.3336	0.000857283	0.0068671	down
ENSG00000158169	FANCC	9	95272036	95272233	Fibroblast.47XYY-Fibroblast.46XY	198	17	97.2821	Intron (ENST00000289081/ENSG00000158169, intron 1 of 14)	Hyper	FA complementation group C	ENSG00000158169.GeneBody	GeneBody	Fibroblast	no		492.117	-0.366018	0.218183	-1.67757	0.0934305	0.259519	not sig
ENSG00000158296	SLC13A3	20	46684101	46684153	Fibroblast.47XYY-Fibroblast.46XY	53	9	44.8303	Promoter (<=1kb)	Hyper	solute carrier family 13 member 3	ENSG00000158296.Promoter	Promoter	Fibroblast	no		108.462	-0.95996	0.287896	-3.33439	0.000854853	0.00685179	down
ENSG00000158315	RHBDL2	1	38941721	38941799	Fibroblast.47XYY-Fibroblast.46XY	79	11	54.8764	Promoter (<=1kb)	Hyper	rhomboid like 2	ENSG00000158315.Promoter	Promoter	Fibroblast	no
ENSG00000158747	NBL1	1	19652406	19652533	Fibroblast.47XYY-Fibroblast.46XY	128	12	60.7025	Intron (ENST00000602662/ENSG00000158747, intron 1 of 3)	Hyper	NBL1, DAN family BMP antagonist	ENSG00000158747.GeneBody	GeneBody	Fibroblast	no		4386.98	0.596451	0.257315	2.31798	0.0204502	0.0864404	not sig
ENSG00000158747	NBL1	1	19643191	19643317	Fibroblast.47XYY-Fibroblast.46XY	127	8	38.0706	Promoter (<=1kb)	Hyper	NBL1, DAN family BMP antagonist	ENSG00000158747.Promoter	Promoter	Fibroblast	no		4386.98	0.596451	0.257315	2.31798	0.0204502	0.0864404	not sig
ENSG00000158882	TOMM40L	1	161226534	161226592	Fibroblast.47XYY-Fibroblast.46XY	59	10	-47.1669	Promoter (<=1kb)	Hypo	translocase of outer mitochondrial membrane 40 like	ENSG00000158882.Promoter	Promoter	Fibroblast	no		392.488	-0.421314	0.121256	-3.47458	0.000511661	0.00444056	not sig
ENSG00000158987	RAPGEF6	5	131633450	131633587	Fibroblast.47XYY-Fibroblast.46XY	138	9	41.9151	Promoter (1-2kb)	Hyper	Rap guanine nucleotide exchange factor 6	ENSG00000158987.Promoter	Promoter	Fibroblast	no		223.595	0.0712932	0.12449	0.572683	0.56686	0.761637	not sig
ENSG00000159128	IFNGR2	21	33401320	33401455	Fibroblast.47XYY-Fibroblast.46XY	136	16	96.6848	Promoter (1-2kb)	Hyper	interferon gamma receptor 2	ENSG00000159128.Promoter	Promoter	Fibroblast	no		2094.02	0.155496	0.0876885	1.77328	0.0761822	0.226489	not sig
ENSG00000159197	KCNE2	21	34298110	34298294	Fibroblast.47XYY-Fibroblast.46XY	185	6	34.0812	Intron (ENST00000362077/ENSG00000272657, intron 5 of 5)	Hyper	potassium voltage-gated channel subfamily E regulatory subunit 2	ENSG00000159197.GeneBody	GeneBody	Fibroblast	no
ENSG00000159217	IGF2BP1	17	49014999	49015133	Fibroblast.47XYY-Fibroblast.46XY	135	19	113.096	Promoter (1-2kb)	Hyper	insulin like growth factor 2 mRNA binding protein 1	ENSG00000159217.Promoter	Promoter	Fibroblast	no		1525.53	1.38126	0.25653	5.38439	7.26901e-08	1.72381e-06	up
ENSG00000159256	MORC3	21	36319644	36319725	Fibroblast.47XYY-Fibroblast.46XY	82	18	103.452	Promoter (<=1kb)	Hyper	MORC family CW-type zinc finger 3	ENSG00000159256.Promoter	Promoter	Fibroblast	no		1891.14	0.0300183	0.191234	0.156971	0.875267	0.938801	not sig
ENSG00000159259	CHAF1B	21	36383868	36383938	Fibroblast.47XYY-Fibroblast.46XY	71	11	54.0468	Promoter (1-2kb)	Hyper	chromatin assembly factor 1 subunit B	ENSG00000159259.Promoter	Promoter	Fibroblast	no		521.686	-0.448805	0.222437	-2.01767	0.0436257	0.151333	not sig
ENSG00000159259	CHAF1B	21	36384327	36384507	Fibroblast.47XYY-Fibroblast.46XY	181	6	29.2017	Promoter (<=1kb)	Hyper	chromatin assembly factor 1 subunit B	ENSG00000159259.Promoter	Promoter	Fibroblast	no		521.686	-0.448805	0.222437	-2.01767	0.0436257	0.151333	not sig
ENSG00000159263	SIM2	21	36706779	36706995	Fibroblast.47XYY-Fibroblast.46XY	217	13	71.9566	Promoter (2-3kb)	Hyper	SIM bHLH transcription factor 2	ENSG00000159263.Promoter	Promoter	Fibroblast	no		309.461	10.9089	1.6641	6.55543	5.54807e-11	2.53579e-09	up
ENSG00000159267	HLCS	21	36923063	36923226	Fibroblast.47XYY-Fibroblast.46XY	164	9	-55.036	Intron (ENST00000674895/ENSG00000159267, intron 5 of 10)	Hypo	holocarboxylase synthetase	ENSG00000159267.GeneBody	GeneBody	Fibroblast	no		1792.23	-0.193054	0.144769	-1.33353	0.182358	0.399646	not sig
ENSG00000159398	CES5A	16	55865987	55866037	Fibroblast.47XYY-Fibroblast.46XY	51	9	36.5311	3' UTR	Hyper	carboxylesterase 5A	ENSG00000159398.GeneBody	GeneBody	Fibroblast	no
ENSG00000159398	CES5A	16	55869511	55869635	Fibroblast.47XYY-Fibroblast.46XY	125	6	30.1447	Promoter (2-3kb)	Hyper	carboxylesterase 5A	ENSG00000159398.Promoter	Promoter	Fibroblast	no
ENSG00000159399	HK2	2	74875420	74875608	Fibroblast.47XYY-Fibroblast.46XY	189	19	93.8029	Intron (ENST00000290573/ENSG00000159399, intron 7 of 17)	Hyper	hexokinase 2	ENSG00000159399.GeneBody	GeneBody	Fibroblast	no		2737.15	0.5433	0.213646	2.543	0.0109906	0.0537847	not sig
ENSG00000159433	STARD9	15	42577373	42577452	Fibroblast.47XYY-Fibroblast.46XY	80	12	70.3115	Promoter (1-2kb)	Hyper	StAR related lipid transfer domain containing 9	ENSG00000159433.Promoter	Promoter	Fibroblast	no		797.395	0.223969	0.134865	1.66069	0.0967762	0.266205	not sig
ENSG00000159433	STARD9	15	42608309	42608427	Fibroblast.47XYY-Fibroblast.46XY	119	4	26.322	Intron (ENST00000290607/ENSG00000159433, intron 3 of 32)	Hyper	StAR related lipid transfer domain containing 9	ENSG00000159433.GeneBody	GeneBody	Fibroblast	no		797.395	0.223969	0.134865	1.66069	0.0967762	0.266205	not sig
ENSG00000159650	UROC1	3	126506637	126506734	Fibroblast.47XYY-Fibroblast.46XY	98	6	27.1492	Intron (ENST00000290868/ENSG00000159650, intron 6 of 19)	Hyper	urocanate hydratase 1	ENSG00000159650.GeneBody	GeneBody	Fibroblast	no
ENSG00000159674	SPON2	4	1202015	1202342	Fibroblast.47XYY-Fibroblast.46XY	328	29	-187.854	Promoter (<=1kb)	Hypo	spondin 2	ENSG00000159674.Promoter	Promoter	Fibroblast	no		2539.96	1.41017	0.292861	4.81515	1.47093e-06	2.62916e-05	up
ENSG00000159714	ZDHHC1	16	67397590	67397720	Fibroblast.47XYY-Fibroblast.46XY	131	10	64.8216	Promoter (1-2kb)	Hyper	zinc finger DHHC-type containing 1	ENSG00000159714.Promoter	Promoter	Fibroblast	no		427.903	-0.542362	0.206668	-2.62432	0.00868227	0.044781	not sig
ENSG00000159788	RGS12	4	3288638	3288743	Fibroblast.47XYY-Fibroblast.46XY	106	4	22.1776	Distal Intergenic	Hyper	regulator of G protein signaling 12	ENSG00000159788.Intergenic	Intergenic	Fibroblast	no		942.311	0.344496	0.129295	2.66441	0.00771233	0.0407652	not sig
ENSG00000159788	RGS12	4	3287806	3287918	Fibroblast.47XYY-Fibroblast.46XY	113	4	20.0536	Distal Intergenic	Hyper	regulator of G protein signaling 12	ENSG00000159788.Intergenic	Intergenic	Fibroblast	no		942.311	0.344496	0.129295	2.66441	0.00771233	0.0407652	not sig
ENSG00000159842	ABR	17	1125170	1125442	Fibroblast.47XYY-Fibroblast.46XY	273	36	186.278	Promoter (<=1kb)	Hyper	ABR activator of RhoGEF and GTPase	ENSG00000159842.Promoter	Promoter	Fibroblast	no		3846.99	0.132004	0.123426	1.0695	0.284846	0.523022	not sig
ENSG00000159842	ABR	17	1240066	1240261	Fibroblast.47XYY-Fibroblast.46XY	196	11	59.4642	Distal Intergenic	Hyper	ABR activator of RhoGEF and GTPase	ENSG00000159842.Intergenic	Intergenic	Fibroblast	no		3846.99	0.132004	0.123426	1.0695	0.284846	0.523022	not sig
ENSG00000159842	ABR	17	1137203	1137337	Fibroblast.47XYY-Fibroblast.46XY	135	15	99.1615	Intron (ENST00000302538/ENSG00000159842, intron 1 of 22)	Hyper	ABR activator of RhoGEF and GTPase	ENSG00000159842.GeneBody	GeneBody	Fibroblast	no		3846.99	0.132004	0.123426	1.0695	0.284846	0.523022	not sig
ENSG00000159842	ABR	17	1125586	1125779	Fibroblast.47XYY-Fibroblast.46XY	194	12	57.1151	Promoter (<=1kb)	Hyper	ABR activator of RhoGEF and GTPase	ENSG00000159842.Promoter	Promoter	Fibroblast	no		3846.99	0.132004	0.123426	1.0695	0.284846	0.523022	not sig
ENSG00000159842	ABR	17	1154350	1154475	Fibroblast.47XYY-Fibroblast.46XY	126	6	42.2323	Promoter (<=1kb)	Hyper	ABR activator of RhoGEF and GTPase	ENSG00000159842.Promoter	Promoter	Fibroblast	no		3846.99	0.132004	0.123426	1.0695	0.284846	0.523022	not sig
ENSG00000159842	ABR	17	1228017	1228130	Fibroblast.47XYY-Fibroblast.46XY	114	8	58.6707	Promoter (<=1kb)	Hyper	ABR activator of RhoGEF and GTPase	ENSG00000159842.Promoter	Promoter	Fibroblast	no		3846.99	0.132004	0.123426	1.0695	0.284846	0.523022	not sig
ENSG00000159842	ABR	17	1230396	1230523	Fibroblast.47XYY-Fibroblast.46XY	128	21	96.7741	Promoter (<=1kb)	Hyper	ABR activator of RhoGEF and GTPase	ENSG00000159842.Promoter	Promoter	Fibroblast	no		3846.99	0.132004	0.123426	1.0695	0.284846	0.523022	not sig
ENSG00000159899	NPR2	9	35792460	35792797	Fibroblast.47XYY-Fibroblast.46XY	338	37	236.06	Promoter (<=1kb)	Hyper	natriuretic peptide receptor 2	ENSG00000159899.Promoter	Promoter	Fibroblast	no		2744.52	0.0702096	0.136402	0.514725	0.606745	0.787636	not sig
ENSG00000159899	NPR2	9	35792939	35793060	Fibroblast.47XYY-Fibroblast.46XY	122	11	64.6923	Promoter (<=1kb)	Hyper	natriuretic peptide receptor 2	ENSG00000159899.Promoter	Promoter	Fibroblast	no		2744.52	0.0702096	0.136402	0.514725	0.606745	0.787636	not sig
ENSG00000160097	FNDC5	1	32873677	32873783	Fibroblast.47XYY-Fibroblast.46XY	107	4	22.032	Promoter (1-2kb)	Hyper	fibronectin type III domain containing 5	ENSG00000160097.Promoter	Promoter	Fibroblast	no		65.91	0.846807	0.241856	3.50129	0.000463018	0.00407462	up
ENSG00000160161	CILP2	19	19541866	19541923	Fibroblast.47XYY-Fibroblast.46XY	58	7	29.9351	Promoter (1-2kb)	Hyper	cartilage intermediate layer protein 2	ENSG00000160161.Promoter	Promoter	Fibroblast	no		27.2854	-1.83636	0.400244	-4.58809	4.47326e-06	7.04259e-05	down
ENSG00000160179	ABCG1	21	42176018	42176132	Fibroblast.47XYY-Fibroblast.46XY	115	4	21.1255	Distal Intergenic	Hyper	ATP binding cassette subfamily G member 1	ENSG00000160179.Intergenic	Intergenic	Fibroblast	no
ENSG00000160181	TFF2	21	42347734	42347954	Fibroblast.47XYY-Fibroblast.46XY	221	17	92.1829	Intron (ENST00000291526/ENSG00000160181, intron 2 of 3)	Hyper	trefoil factor 2	ENSG00000160181.GeneBody	GeneBody	Fibroblast	no
ENSG00000160190	SLC37A1	21	42513271	42513350	Fibroblast.47XYY-Fibroblast.46XY	80	9	-38.6459	Promoter (<=1kb)	Hypo	solute carrier family 37 member 1	ENSG00000160190.Promoter	Promoter	Fibroblast	no
ENSG00000160199	PKNOX1	21	43001730	43001816	Fibroblast.47XYY-Fibroblast.46XY	87	11	51.1469	Promoter (2-3kb)	Hyper	PBX/knotted 1 homeobox 1	ENSG00000160199.Promoter	Promoter	Fibroblast	no		1279.99	0.00682683	0.178911	0.0381577	0.969562	0.9872	not sig
ENSG00000160202	CRYAA	21	43210298	43210416	Fibroblast.47XYY-Fibroblast.46XY	119	15	69.2767	Distal Intergenic	Hyper	crystallin alpha A	ENSG00000160202.Intergenic	Intergenic	Fibroblast	no
ENSG00000160208	RRP1B	21	43690520	43690687	Fibroblast.47XYY-Fibroblast.46XY	168	6	38.4369	Intron (ENST00000340648/ENSG00000160208, intron 14 of 15)	Hyper	ribosomal RNA processing 1B	ENSG00000160208.GeneBody	GeneBody	Fibroblast	no		1926.95	-0.238668	0.16879	-1.414	0.157363	0.364668	not sig
ENSG00000160208	RRP1B	21	43660475	43660531	Fibroblast.47XYY-Fibroblast.46XY	57	11	51.3415	Promoter (<=1kb)	Hyper	ribosomal RNA processing 1B	ENSG00000160208.Promoter	Promoter	Fibroblast	no		1926.95	-0.238668	0.16879	-1.414	0.157363	0.364668	not sig
ENSG00000160209	PDXK	21	43729325	43729491	Fibroblast.47XYY-Fibroblast.46XY	167	15	-70.9627	Promoter (<=1kb)	Hypo	pyridoxal kinase	ENSG00000160209.Promoter	Promoter	Fibroblast	no		3913.41	0.0774632	0.159519	0.485604	0.627248	0.802375	not sig
ENSG00000160224	AIRE	21	44294343	44294534	Fibroblast.47XYY-Fibroblast.46XY	192	14	66.7448	Exon (ENST00000530812/ENSG00000160224, exon 10 of 12)	Hyper	autoimmune regulator	ENSG00000160224.GeneBody	GeneBody	Fibroblast	no
ENSG00000160256	SLX9	21	44950527	44950634	Fibroblast.47XYY-Fibroblast.46XY	108	7	32.5802	Intron (ENST00000397826/ENSG00000160256, intron 2 of 5)	Hyper	SLX9 ribosome biogenesis factor	ENSG00000160256.GeneBody	GeneBody	Fibroblast	no		587.822	-0.161579	0.172989	-0.934044	0.350281	0.589715	not sig
ENSG00000160271	RALGDS	9	133125856	133126067	Fibroblast.47XYY-Fibroblast.46XY	212	10	48.7294	Intron (ENST00000393160/ENSG00000160271, intron 1 of 17)	Hyper	ral guanine nucleotide dissociation stimulator	ENSG00000160271.GeneBody	GeneBody	Fibroblast	no		230.025	0.340129	0.166392	2.04414	0.0409394	0.144706	not sig
ENSG00000160271	RALGDS	9	133129907	133130064	Fibroblast.47XYY-Fibroblast.46XY	158	8	41.3294	Promoter (<=1kb)	Hyper	ral guanine nucleotide dissociation stimulator	ENSG00000160271.Promoter	Promoter	Fibroblast	no		230.025	0.340129	0.166392	2.04414	0.0409394	0.144706	not sig
ENSG00000160271	RALGDS	9	133113723	133113858	Fibroblast.47XYY-Fibroblast.46XY	136	5	-21.818	Intron (ENST00000493438/ENSG00000160271, intron 1 of 17)	Hypo	ral guanine nucleotide dissociation stimulator	ENSG00000160271.GeneBody	GeneBody	Fibroblast	no		230.025	0.340129	0.166392	2.04414	0.0409394	0.144706	not sig
ENSG00000160285	LSS	21	46225305	46225441	Fibroblast.47XYY-Fibroblast.46XY	137	18	89.3027	Exon (ENST00000626933/ENSG00000223901, exon 4 of 4)	Hyper	lanosterol synthase	ENSG00000160285.GeneBody	GeneBody	Fibroblast	no		5536.97	-0.102236	0.170048	-0.601216	0.547696	0.748605	not sig
ENSG00000160293	VAV2	9	133848817	133848926	Fibroblast.47XYY-Fibroblast.46XY	110	7	-41.3603	Intron (ENST00000406606/ENSG00000160293, intron 3 of 26)	Hypo	vav guanine nucleotide exchange factor 2	ENSG00000160293.GeneBody	GeneBody	Fibroblast	no		1424.75	-0.320555	0.143138	-2.23948	0.0251248	0.100421	not sig
ENSG00000160325	CACFD1	9	133457868	133457993	Fibroblast.47XYY-Fibroblast.46XY	126	8	37.4696	Promoter (1-2kb)	Hyper	calcium channel flower domain containing 1	ENSG00000160325.Promoter	Promoter	Fibroblast	no		311.83	-0.0991935	0.25879	-0.383298	0.701499	0.845417	not sig
ENSG00000160339	FCN2	9	134877761	134878817	Fibroblast.47XYY-Fibroblast.46XY	1057	9	54.6804	Promoter (1-2kb)	Hyper	ficolin 2	ENSG00000160339.Promoter	Promoter	Fibroblast	no
ENSG00000160447	PKN3	9	128700053	128700216	Fibroblast.47XYY-Fibroblast.46XY	164	4	27.2245	Promoter (2-3kb)	Hyper	protein kinase N3	ENSG00000160447.Promoter	Promoter	Fibroblast	no		316.988	0.420287	0.203399	2.06632	0.0387983	0.139036	not sig
ENSG00000160602	NEK8	17	28729398	28729516	Fibroblast.47XYY-Fibroblast.46XY	119	13	60.883	Promoter (<=1kb)	Hyper	NIMA related kinase 8	ENSG00000160602.Promoter	Promoter	Fibroblast	no		214.18	0.0604305	0.167204	0.361417	0.717788	0.854861	not sig
ENSG00000160679	CHTOP	1	153633625	153633835	Fibroblast.47XYY-Fibroblast.46XY	211	21	129.638	Promoter (<=1kb)	Hyper	chromatin target of PRMT1	ENSG00000160679.Promoter	Promoter	Fibroblast	no		2426.31	0.0504454	0.105934	0.476196	0.633935	0.806197	not sig
ENSG00000160781	PAQR6	1	156245626	156245734	Fibroblast.47XYY-Fibroblast.46XY	109	20	-99.3804	Promoter (2-3kb)	Hypo	progestin and adipoQ receptor family member 6	ENSG00000160781.Promoter	Promoter	Fibroblast	no		76.4806	-0.0301523	0.215481	-0.13993	0.888715	0.946464	not sig
ENSG00000160883	HK3	5	176881760	176881868	Fibroblast.47XYY-Fibroblast.46XY	109	11	59.1731	Promoter (<=1kb)	Hyper	hexokinase 3	ENSG00000160883.Promoter	Promoter	Fibroblast	no
ENSG00000160908	ZNF394	7	99499101	99499204	Fibroblast.47XYY-Fibroblast.46XY	104	8	38.0401	Promoter (<=1kb)	Hyper	zinc finger protein 394	ENSG00000160908.Promoter	Promoter	Fibroblast	no		595.542	-0.163333	0.180956	-0.902615	0.36673	0.605972	not sig
ENSG00000160948	VPS28	8	144422606	144422796	Fibroblast.47XYY-Fibroblast.46XY	191	12	71.5795	Distal Intergenic	Hyper	VPS28 subunit of ESCRT-I	ENSG00000160948.Intergenic	Intergenic	Fibroblast	no		2683.3	0.0766042	0.167389	0.457641	0.64721	0.813726	not sig
ENSG00000160953	PWWP3A	19	1346949	1347067	Fibroblast.47XYY-Fibroblast.46XY	119	12	62.117	Distal Intergenic	Hyper	PWWP domain containing 3A, DNA repair factor	ENSG00000160953.Intergenic	Intergenic	Fibroblast	no		2424.93	0.265564	0.0817621	3.24801	0.00116215	0.0088376	not sig
ENSG00000160963	COL26A1	7	101542687	101542767	Fibroblast.47XYY-Fibroblast.46XY	81	4	21.212	Intron (ENST00000313669/ENSG00000160963, intron 5 of 12)	Hyper	collagen type XXVI alpha 1 chain	ENSG00000160963.GeneBody	GeneBody	Fibroblast	no
ENSG00000160963	COL26A1	7	101537391	101537487	Fibroblast.47XYY-Fibroblast.46XY	97	9	42.4625	Intron (ENST00000313669/ENSG00000160963, intron 4 of 12)	Hyper	collagen type XXVI alpha 1 chain	ENSG00000160963.GeneBody	GeneBody	Fibroblast	no
ENSG00000160963	COL26A1	7	101514798	101514890	Fibroblast.47XYY-Fibroblast.46XY	93	4	20.8006	Intron (ENST00000313669/ENSG00000160963, intron 3 of 12)	Hyper	collagen type XXVI alpha 1 chain	ENSG00000160963.GeneBody	GeneBody	Fibroblast	no
ENSG00000161179	YDJC	22	21600416	21600552	Fibroblast.47XYY-Fibroblast.46XY	137	6	43.3513	Intron (ENST00000458578/ENSG00000185651, intron 2 of 3)	Hyper	YdjC chitooligosaccharide deacetylase homolog	ENSG00000161179.GeneBody	GeneBody	Fibroblast	no		296.362	-0.0332411	0.126014	-0.26379	0.791942	0.897303	not sig
ENSG00000162006	MSLNL	16	778603	778706	Fibroblast.47XYY-Fibroblast.46XY	104	6	-25.4003	Promoter (<=1kb)	Hypo	mesothelin like	ENSG00000162006.Promoter	Promoter	Fibroblast	no
ENSG00000162032	SPSB3	16	1781466	1781568	Fibroblast.47XYY-Fibroblast.46XY	103	5	26.5382	Promoter (<=1kb)	Hyper	splA/ryanodine receptor domain and SOCS box containing 3	ENSG00000162032.Promoter	Promoter	Fibroblast	no
ENSG00000162105	SHANK2	11	70742697	70742813	Fibroblast.47XYY-Fibroblast.46XY	117	10	-46.2995	Intron (ENST00000656230/ENSG00000162105, intron 4 of 15)	Hypo	SH3 and multiple ankyrin repeat domains 2	ENSG00000162105.GeneBody	GeneBody	Fibroblast	no		43.3036	-1.20825	0.361769	-3.33983	0.000838294	0.00673952	down
ENSG00000162105	SHANK2	11	70743106	70743283	Fibroblast.47XYY-Fibroblast.46XY	178	19	-94.7391	Intron (ENST00000656230/ENSG00000162105, intron 4 of 15)	Hypo	SH3 and multiple ankyrin repeat domains 2	ENSG00000162105.GeneBody	GeneBody	Fibroblast	no		43.3036	-1.20825	0.361769	-3.33983	0.000838294	0.00673952	down
ENSG00000162105	SHANK2	11	70718187	70718275	Fibroblast.47XYY-Fibroblast.46XY	89	8	-34.3637	Promoter (<=1kb)	Hypo	SH3 and multiple ankyrin repeat domains 2	ENSG00000162105.Promoter	Promoter	Fibroblast	no		43.3036	-1.20825	0.361769	-3.33983	0.000838294	0.00673952	down
ENSG00000162105	SHANK2	11	71264457	71264552	Fibroblast.47XYY-Fibroblast.46XY	96	4	19.2661	Distal Intergenic	Hyper	SH3 and multiple ankyrin repeat domains 2	ENSG00000162105.Intergenic	Intergenic	Fibroblast	no		43.3036	-1.20825	0.361769	-3.33983	0.000838294	0.00673952	down
ENSG00000162337	LRP5	11	68314755	68314886	Fibroblast.47XYY-Fibroblast.46XY	132	6	-40.5639	Promoter (2-3kb)	Hypo	LDL receptor related protein 5	ENSG00000162337.Promoter	Promoter	Fibroblast	no		2041.02	0.278782	0.258328	1.07918	0.280508	0.519157	not sig
ENSG00000162337	LRP5	11	68404306	68404427	Fibroblast.47XYY-Fibroblast.46XY	122	4	19.9769	Promoter (<=1kb)	Hyper	LDL receptor related protein 5	ENSG00000162337.Promoter	Promoter	Fibroblast	no		2041.02	0.278782	0.258328	1.07918	0.280508	0.519157	not sig
ENSG00000162344	FGF19	11	69713437	69713546	Fibroblast.47XYY-Fibroblast.46XY	110	6	29.9921	Distal Intergenic	Hyper	fibroblast growth factor 19	ENSG00000162344.Intergenic	Intergenic	Fibroblast	no
ENSG00000162378	ZYG11B	1	52721685	52721740	Fibroblast.47XYY-Fibroblast.46XY	56	6	27.2034	Distal Intergenic	Hyper	zyg-11 family member B, cell cycle regulator	ENSG00000162378.Intergenic	Intergenic	Fibroblast	no		2393.23	-0.258577	0.0898697	-2.87724	0.00401164	0.0241191	not sig
ENSG00000162415	ZSWIM5	1	45247758	45247881	Fibroblast.47XYY-Fibroblast.46XY	124	12	54.4365	Intron (ENST00000464588/ENSG00000162415, intron 2 of 2)	Hyper	zinc finger SWIM-type containing 5	ENSG00000162415.GeneBody	GeneBody	Fibroblast	no
ENSG00000162522	KIAA1522	1	32742334	32742410	Fibroblast.47XYY-Fibroblast.46XY	77	9	-48.4504	Promoter (<=1kb)	Hypo	KIAA1522	ENSG00000162522.Promoter	Promoter	Fibroblast	no		1767.39	0.513914	0.177749	2.89124	0.00383725	0.0232933	not sig
ENSG00000162591	MEGF6	1	3497581	3497693	Fibroblast.47XYY-Fibroblast.46XY	113	11	48.3385	Promoter (<=1kb)	Hyper	multiple EGF like domains 6	ENSG00000162591.Promoter	Promoter	Fibroblast	no		9761.66	-0.155646	0.248065	-0.627441	0.53037	0.736412	not sig
ENSG00000162591	MEGF6	1	3534622	3534761	Fibroblast.47XYY-Fibroblast.46XY	140	8	39.7956	Intron (ENST00000356575/ENSG00000162591, intron 4 of 36)	Hyper	multiple EGF like domains 6	ENSG00000162591.GeneBody	GeneBody	Fibroblast	no		9761.66	-0.155646	0.248065	-0.627441	0.53037	0.736412	not sig
ENSG00000162591	MEGF6	1	3595094	3595261	Fibroblast.47XYY-Fibroblast.46XY	168	21	104.165	Intron (ENST00000356575/ENSG00000162591, intron 3 of 36)	Hyper	multiple EGF like domains 6	ENSG00000162591.GeneBody	GeneBody	Fibroblast	no		9761.66	-0.155646	0.248065	-0.627441	0.53037	0.736412	not sig
ENSG00000162599	NFIA	1	61053998	61054254	Fibroblast.47XYY-Fibroblast.46XY	257	20	-257.462	Promoter (<=1kb)	Hypo	nuclear factor I A	ENSG00000162599.Promoter	Promoter	Fibroblast	no		280.757	-0.222091	0.219755	-1.01063	0.312193	0.553326	not sig
ENSG00000162599	NFIA	1	61052203	61052365	Fibroblast.47XYY-Fibroblast.46XY	163	13	63.6737	Promoter (1-2kb)	Hyper	nuclear factor I A	ENSG00000162599.Promoter	Promoter	Fibroblast	no		280.757	-0.222091	0.219755	-1.01063	0.312193	0.553326	not sig
ENSG00000162599	NFIA	1	61053720	61053847	Fibroblast.47XYY-Fibroblast.46XY	128	14	-88.2184	Promoter (<=1kb)	Hypo	nuclear factor I A	ENSG00000162599.Promoter	Promoter	Fibroblast	no		280.757	-0.222091	0.219755	-1.01063	0.312193	0.553326	not sig
ENSG00000162618	ADGRL4	1	79137465	79137623	Fibroblast.47XYY-Fibroblast.46XY	159	8	41.7616	Intron (ENST00000661030/ENSG00000162618, intron 1 of 16)	Hyper	adhesion G protein-coupled receptor L4	ENSG00000162618.GeneBody	GeneBody	Fibroblast	no		829.845	-1.40093	0.15177	-9.23059	2.69134e-20	4.55767e-18	down
ENSG00000162624	LHX8	1	75130289	75130368	Fibroblast.47XYY-Fibroblast.46XY	80	10	-43.467	Promoter (1-2kb)	Hypo	LIM homeobox 8	ENSG00000162624.Promoter	Promoter	Fibroblast	no		36.992	-5.93697	1.34926	-4.40016	1.08173e-05	0.000153311	down
ENSG00000162641	AKNAD1	1	108831718	108831934	Fibroblast.47XYY-Fibroblast.46XY	217	10	45.124	Promoter (<=1kb)	Hyper	AKNA domain containing 1	ENSG00000162641.Promoter	Promoter	Fibroblast	no
ENSG00000162745	OLFML2B	1	162022342	162022544	Fibroblast.47XYY-Fibroblast.46XY	203	18	128.083	Promoter (1-2kb)	Hyper	olfactomedin like 2B	ENSG00000162745.Promoter	Promoter	Fibroblast	no		3571.61	-0.217277	0.294365	-0.738121	0.460441	0.684302	not sig
ENSG00000162779	AXDND1	1	179528751	179528887	Fibroblast.47XYY-Fibroblast.46XY	137	10	68.9597	Intron (ENST00000617277/ENSG00000162779, intron 22 of 24)	Hyper	axonemal dynein light chain domain containing 1	ENSG00000162779.GeneBody	GeneBody	Fibroblast	no
ENSG00000162804	SNED1	2	241082738	241082918	Fibroblast.47XYY-Fibroblast.46XY	181	4	21.7855	Intron (ENST00000310397/ENSG00000162804, intron 29 of 31)	Hyper	sushi, nidogen and EGF like domains 1	ENSG00000162804.GeneBody	GeneBody	Fibroblast	no		1446.97	-0.412643	0.331321	-1.24545	0.212967	0.440439	not sig
ENSG00000162814	SPATA17	1	217706958	217707076	Fibroblast.47XYY-Fibroblast.46XY	119	8	45.2407	Intron (ENST00000470448/ENSG00000162814, intron 6 of 7)	Hyper	spermatogenesis associated 17	ENSG00000162814.GeneBody	GeneBody	Fibroblast	no
ENSG00000162836	ACP6	1	147654199	147654321	Fibroblast.47XYY-Fibroblast.46XY	123	4	18.2028	3' UTR	Hyper	acid phosphatase 6, lysophosphatidic	ENSG00000162836.GeneBody	GeneBody	Fibroblast	no		251.125	0.382465	0.181271	2.10991	0.0348664	0.127859	not sig
ENSG00000162949	CAPN13	2	30706768	30706830	Fibroblast.47XYY-Fibroblast.46XY	63	5	20.2922	Distal Intergenic	Hyper	calpain 13	ENSG00000162949.Intergenic	Intergenic	Fibroblast	no
ENSG00000162975	KCNF1	2	10903491	10903615	Fibroblast.47XYY-Fibroblast.46XY	125	7	60.6758	Distal Intergenic	Hyper	potassium voltage-gated channel modifier subfamily F member 1	ENSG00000162975.Intergenic	Intergenic	Fibroblast	no
ENSG00000162980	ARL5A	2	151830508	151830568	Fibroblast.47XYY-Fibroblast.46XY	61	4	18.6571	Promoter (2-3kb)	Hyper	ADP ribosylation factor like GTPase 5A	ENSG00000162980.Promoter	Promoter	Fibroblast	no		729.697	-0.0155177	0.162713	-0.0953689	0.924022	0.963787	not sig
ENSG00000163053	SLC16A14	2	230068826	230068914	Fibroblast.47XYY-Fibroblast.46XY	89	9	-43.4335	Promoter (<=1kb)	Hypo	solute carrier family 16 member 14	ENSG00000163053.Promoter	Promoter	Fibroblast	no
ENSG00000163064	EN1	2	118850048	118850295	Fibroblast.47XYY-Fibroblast.46XY	248	34	-169.849	Promoter (2-3kb)	Hypo	engrailed homeobox 1	ENSG00000163064.Promoter	Promoter	Fibroblast	no		1820.41	0.0227685	0.289885	0.0785432	0.937396	0.970229	not sig
ENSG00000163116	STPG2	4	98192049	98192182	Fibroblast.47XYY-Fibroblast.46XY	134	13	76.1087	Distal Intergenic	Hyper	sperm tail PG-rich repeat containing 2	ENSG00000163116.Intergenic	Intergenic	Fibroblast	no
ENSG00000163132	MSX1	4	4871337	4871429	Fibroblast.47XYY-Fibroblast.46XY	93	12	-88.3536	Distal Intergenic	Hypo	msh homeobox 1	ENSG00000163132.Intergenic	Intergenic	Fibroblast	no		1059.37	-0.534499	0.203429	-2.62744	0.00860291	0.0444411	not sig
ENSG00000163132	MSX1	4	4867327	4870681	Fibroblast.47XYY-Fibroblast.46XY	3355	82	-561.527	Distal Intergenic	Hypo	msh homeobox 1	ENSG00000163132.Intergenic	Intergenic	Fibroblast	no		1059.37	-0.534499	0.203429	-2.62744	0.00860291	0.0444411	not sig
ENSG00000163132	MSX1	4	4871947	4872755	Fibroblast.47XYY-Fibroblast.46XY	809	33	-185.628	Distal Intergenic	Hypo	msh homeobox 1	ENSG00000163132.Intergenic	Intergenic	Fibroblast	no		1059.37	-0.534499	0.203429	-2.62744	0.00860291	0.0444411	not sig
ENSG00000163132	MSX1	4	4855667	4855833	Fibroblast.47XYY-Fibroblast.46XY	167	11	-52.2471	Distal Intergenic	Hypo	msh homeobox 1	ENSG00000163132.Intergenic	Intergenic	Fibroblast	no		1059.37	-0.534499	0.203429	-2.62744	0.00860291	0.0444411	not sig
ENSG00000163132	MSX1	4	4856940	4857055	Fibroblast.47XYY-Fibroblast.46XY	116	22	-79.1146	Promoter (2-3kb)	Hypo	msh homeobox 1	ENSG00000163132.Promoter	Promoter	Fibroblast	no		1059.37	-0.534499	0.203429	-2.62744	0.00860291	0.0444411	not sig
ENSG00000163132	MSX1	4	4852388	4852502	Fibroblast.47XYY-Fibroblast.46XY	115	10	52.5093	Distal Intergenic	Hyper	msh homeobox 1	ENSG00000163132.Intergenic	Intergenic	Fibroblast	no		1059.37	-0.534499	0.203429	-2.62744	0.00860291	0.0444411	not sig
ENSG00000163145	C1QTNF7	4	15341769	15341906	Fibroblast.47XYY-Fibroblast.46XY	138	15	-76.3545	Promoter (1-2kb)	Hypo	C1q and TNF related 7	ENSG00000163145.Promoter	Promoter	Fibroblast	no
ENSG00000163191	S100A11	1	152037398	152037448	Fibroblast.47XYY-Fibroblast.46XY	51	10	46.513	Promoter (<=1kb)	Hyper	S100 calcium binding protein A11	ENSG00000163191.Promoter	Promoter	Fibroblast	no		15773	-0.0575441	0.0570088	-1.00939	0.312788	0.553984	not sig
ENSG00000163219	ARHGAP25	2	68738616	68738745	Fibroblast.47XYY-Fibroblast.46XY	130	4	19.5147	Intron (ENST00000463483/ENSG00000163219, intron 2 of 7)	Hyper	Rho GTPase activating protein 25	ENSG00000163219.GeneBody	GeneBody	Fibroblast	no
ENSG00000163220	S100A9	1	153354359	153354495	Fibroblast.47XYY-Fibroblast.46XY	137	12	91.7071	Distal Intergenic	Hyper	S100 calcium binding protein A9	ENSG00000163220.Intergenic	Intergenic	Fibroblast	no
ENSG00000163251	FZD5	2	207766959	207767030	Fibroblast.47XYY-Fibroblast.46XY	72	15	-67.0773	Promoter (2-3kb)	Hypo	frizzled class receptor 5	ENSG00000163251.Promoter	Promoter	Fibroblast	no		66.7503	-1.84257	0.261405	-7.04873	1.80557e-12	1.02801e-10	down
ENSG00000163295	ALPI	2	232452405	232452524	Fibroblast.47XYY-Fibroblast.46XY	120	6	30.8019	Distal Intergenic	Hyper	alkaline phosphatase, intestinal	ENSG00000163295.Intergenic	Intergenic	Fibroblast	no
ENSG00000163394	CCKAR	4	26490727	26490866	Fibroblast.47XYY-Fibroblast.46XY	140	9	-45.0482	Promoter (<=1kb)	Hypo	cholecystokinin A receptor	ENSG00000163394.Promoter	Promoter	Fibroblast	no
ENSG00000163394	CCKAR	4	26500802	26500938	Fibroblast.47XYY-Fibroblast.46XY	137	8	57.484	Distal Intergenic	Hyper	cholecystokinin A receptor	ENSG00000163394.Intergenic	Intergenic	Fibroblast	no
ENSG00000163440	PDCL2	4	55603633	55603708	Fibroblast.47XYY-Fibroblast.46XY	76	13	59.6651	Intron (ENST00000511469/ENSG00000109255, intron 6 of 8)	Hyper	phosducin like 2	ENSG00000163440.GeneBody	GeneBody	Fibroblast	no
ENSG00000163517	HDAC11	3	13516471	13516589	Fibroblast.47XYY-Fibroblast.46XY	119	7	33.8759	Distal Intergenic	Hyper	histone deacetylase 11	ENSG00000163517.Intergenic	Intergenic	Fibroblast	no		559.074	-0.163723	0.20961	-0.781083	0.434754	0.664438	not sig
ENSG00000163520	FBLN2	3	13532347	13532439	Fibroblast.47XYY-Fibroblast.46XY	93	6	29.7024	Distal Intergenic	Hyper	fibulin 2	ENSG00000163520.Intergenic	Intergenic	Fibroblast	no		24976.8	-0.760762	0.246211	-3.08988	0.00200237	0.013805	down
ENSG00000163545	NUAK2	1	205299173	205299308	Fibroblast.47XYY-Fibroblast.46XY	136	11	51.1962	Distal Intergenic	Hyper	NUAK family kinase 2	ENSG00000163545.Intergenic	Intergenic	Fibroblast	no		331.738	0.606207	0.205495	2.94998	0.00317791	0.0200751	up
ENSG00000163637	PRICKLE2	3	64295539	64295625	Fibroblast.47XYY-Fibroblast.46XY	87	7	31.8452	Intron (ENST00000295902/ENSG00000163637, intron 2 of 8)	Hyper	prickle planar cell polarity protein 2	ENSG00000163637.GeneBody	GeneBody	Fibroblast	no		1204.08	0.221557	0.162058	1.36714	0.17158	0.385181	not sig
ENSG00000163644	PPM1K	4	88283271	88283384	Fibroblast.47XYY-Fibroblast.46XY	114	11	60.0665	Promoter (<=1kb)	Hyper	protein phosphatase, Mg2+/Mn2+ dependent 1K	ENSG00000163644.Promoter	Promoter	Fibroblast	no		444.608	0.275605	0.156796	1.75773	0.0787935	0.231697	not sig
ENSG00000163645	ERICH6	3	150682033	150682110	Fibroblast.47XYY-Fibroblast.46XY	78	7	31.5607	Promoter (<=1kb)	Hyper	glutamate rich 6	ENSG00000163645.Promoter	Promoter	Fibroblast	no
ENSG00000163673	DCLK3	3	36715364	36715500	Fibroblast.47XYY-Fibroblast.46XY	137	10	57.0857	Exon (ENST00000416516/ENSG00000163673, exon 5 of 5)	Hyper	doublecortin like kinase 3	ENSG00000163673.GeneBody	GeneBody	Fibroblast	no
ENSG00000163697	APBB2	4	41022060	41022127	Fibroblast.47XYY-Fibroblast.46XY	68	4	-18.2384	Intron (ENST00000508593/ENSG00000163697, intron 5 of 17)	Hypo	amyloid beta precursor protein binding family B member 2	ENSG00000163697.GeneBody	GeneBody	Fibroblast	no		1785.3	-0.00879707	0.218574	-0.0402475	0.967896	0.986112	not sig
ENSG00000163697	APBB2	4	40852120	40852177	Fibroblast.47XYY-Fibroblast.46XY	58	6	-26.5561	Intron (ENST00000508593/ENSG00000163697, intron 12 of 17)	Hypo	amyloid beta precursor protein binding family B member 2	ENSG00000163697.GeneBody	GeneBody	Fibroblast	no		1785.3	-0.00879707	0.218574	-0.0402475	0.967896	0.986112	not sig
ENSG00000163873	GRIK3	1	36988439	36988503	Fibroblast.47XYY-Fibroblast.46XY	65	9	40.4205	Intron (ENST00000373091/ENSG00000163873, intron 1 of 15)	Hyper	glutamate ionotropic receptor kainate type subunit 3	ENSG00000163873.GeneBody	GeneBody	Fibroblast	no
ENSG00000163884	KLF15	3	126355702	126355757	Fibroblast.47XYY-Fibroblast.46XY	56	6	26.7071	Promoter (1-2kb)	Hyper	KLF transcription factor 15	ENSG00000163884.Promoter	Promoter	Fibroblast	no
ENSG00000163913	IFT122	3	129514280	129514447	Fibroblast.47XYY-Fibroblast.46XY	168	6	37.22	Promoter (1-2kb)	Hyper	intraflagellar transport 122	ENSG00000163913.Promoter	Promoter	Fibroblast	no		1261.55	-0.116849	0.130898	-0.892673	0.372032	0.610229	not sig
ENSG00000163995	ABLIM2	4	8122979	8123136	Fibroblast.47XYY-Fibroblast.46XY	158	8	53.8835	Intron (ENST00000361737/ENSG00000163995, intron 1 of 16)	Hyper	actin binding LIM protein family member 2	ENSG00000163995.GeneBody	GeneBody	Fibroblast	no
ENSG00000163995	ABLIM2	4	8089195	8089347	Fibroblast.47XYY-Fibroblast.46XY	153	4	32.2726	Intron (ENST00000361737/ENSG00000163995, intron 3 of 16)	Hyper	actin binding LIM protein family member 2	ENSG00000163995.GeneBody	GeneBody	Fibroblast	no
ENSG00000164050	PLXNB1	3	48409188	48409330	Fibroblast.47XYY-Fibroblast.46XY	143	7	40.788	Promoter (<=1kb)	Hyper	plexin B1	ENSG00000164050.Promoter	Promoter	Fibroblast	no		1214.07	-0.842881	0.232593	-3.62384	0.000290256	0.00272688	down
ENSG00000164062	APEH	3	49663195	49663334	Fibroblast.47XYY-Fibroblast.46XY	140	8	40.5308	Exon (ENST00000296452/ENSG00000164061, exon 7 of 12)	Hyper	acylaminoacyl-peptide hydrolase	ENSG00000164062.GeneBody	GeneBody	Fibroblast	no		2784.91	-0.197947	0.166629	-1.18795	0.234853	0.467357	not sig
ENSG00000164093	PITX2	4	110619546	110619630	Fibroblast.47XYY-Fibroblast.46XY	85	9	-41.2067	Promoter (<=1kb)	Hypo	paired like homeodomain 2	ENSG00000164093.Promoter	Promoter	Fibroblast	no		1418.69	-0.0809736	0.245888	-0.329311	0.741921	0.86872	not sig
ENSG00000164318	EGFLAM	5	38257756	38257843	Fibroblast.47XYY-Fibroblast.46XY	88	17	-87.1828	Promoter (<=1kb)	Hypo	EGF like, fibronectin type III and laminin G domains	ENSG00000164318.Promoter	Promoter	Fibroblast	no
ENSG00000164430	CGAS	6	73450709	73450846	Fibroblast.47XYY-Fibroblast.46XY	138	20	122.704	Promoter (1-2kb)	Hyper	cyclic GMP-AMP synthase	ENSG00000164430.Promoter	Promoter	Fibroblast	no		267.294	-0.499819	0.168818	-2.96071	0.00306935	0.0195671	not sig
ENSG00000164483	SAMD3	6	130246619	130246745	Fibroblast.47XYY-Fibroblast.46XY	127	4	22.39	Intron (ENST00000368134/ENSG00000164483, intron 2 of 13)	Hyper	sterile alpha motif domain containing 3	ENSG00000164483.GeneBody	GeneBody	Fibroblast	no
ENSG00000164488	DACT2	6	168311127	168311280	Fibroblast.47XYY-Fibroblast.46XY	154	9	47.0204	Exon (ENST00000366796/ENSG00000164488, exon 2 of 6)	Hyper	dishevelled binding antagonist of beta catenin 2	ENSG00000164488.GeneBody	GeneBody	Fibroblast	no
ENSG00000164512	ANKRD55	5	56154748	56154883	Fibroblast.47XYY-Fibroblast.46XY	136	8	47.5518	Intron (ENST00000341048/ENSG00000164512, intron 6 of 11)	Hyper	ankyrin repeat domain 55	ENSG00000164512.GeneBody	GeneBody	Fibroblast	no
ENSG00000164530	PI16	6	36965511	36965607	Fibroblast.47XYY-Fibroblast.46XY	97	9	41.5364	Promoter (2-3kb)	Hyper	peptidase inhibitor 16	ENSG00000164530.Promoter	Promoter	Fibroblast	no		302.32	-1.74635	0.504326	-3.46273	0.00053472	0.00461944	down
ENSG00000164591	MYOZ3	5	150673549	150673635	Fibroblast.47XYY-Fibroblast.46XY	87	10	49.2948	Promoter (<=1kb)	Hyper	myozenin 3	ENSG00000164591.Promoter	Promoter	Fibroblast	no		94.5388	0.33791	0.275412	1.22692	0.219851	0.449121	not sig
ENSG00000164600	NEUROD6	7	31376636	31376772	Fibroblast.47XYY-Fibroblast.46XY	137	12	64.2142	Distal Intergenic	Hyper	neuronal differentiation 6	ENSG00000164600.Intergenic	Intergenic	Fibroblast	no
ENSG00000164626	KCNK5	6	39243946	39244077	Fibroblast.47XYY-Fibroblast.46XY	132	12	85.5832	Distal Intergenic	Hyper	potassium two pore domain channel subfamily K member 5	ENSG00000164626.Intergenic	Intergenic	Fibroblast	no
ENSG00000164647	STEAP1	7	90153657	90153819	Fibroblast.47XYY-Fibroblast.46XY	163	16	95.0028	Promoter (<=1kb)	Hyper	STEAP family member 1	ENSG00000164647.Promoter	Promoter	Fibroblast	no		877.503	-0.523332	0.287354	-1.82121	0.0685743	0.210308	not sig
ENSG00000164690	SHH	7	155816306	155816428	Fibroblast.47XYY-Fibroblast.46XY	123	11	61.7729	Distal Intergenic	Hyper	sonic hedgehog signaling molecule	ENSG00000164690.Intergenic	Intergenic	Fibroblast	no
ENSG00000164690	SHH	7	155795777	155795865	Fibroblast.47XYY-Fibroblast.46XY	89	9	39.0592	Distal Intergenic	Hyper	sonic hedgehog signaling molecule	ENSG00000164690.Intergenic	Intergenic	Fibroblast	no
ENSG00000164742	ADCY1	7	45564672	45564784	Fibroblast.47XYY-Fibroblast.46XY	113	12	89.6434	Distal Intergenic	Hyper	adenylate cyclase 1	ENSG00000164742.Intergenic	Intergenic	Fibroblast	no		57.375	1.59109	0.396286	4.015	5.94456e-05	0.000691212	up
ENSG00000164764	SBSPON	8	73092516	73092620	Fibroblast.47XYY-Fibroblast.46XY	105	13	-70.8141	Promoter (<=1kb)	Hypo	somatomedin B and thrombospondin type 1 domain containing	ENSG00000164764.Promoter	Promoter	Fibroblast	no
ENSG00000164808	SPIDR	8	47236911	47237047	Fibroblast.47XYY-Fibroblast.46XY	137	6	26.9776	Distal Intergenic	Hyper	scaffold protein involved in DNA repair	ENSG00000164808.Intergenic	Intergenic	Fibroblast	no		1696.06	-0.339739	0.216062	-1.57242	0.115854	0.299299	not sig
ENSG00000164825	DEFB1	8	6865655	6865729	Fibroblast.47XYY-Fibroblast.46XY	75	6	25.9575	Intron (ENST00000657010/ENSG00000245857, intron 4 of 4)	Hyper	defensin beta 1	ENSG00000164825.GeneBody	GeneBody	Fibroblast	no
ENSG00000164828	SUN1	7	868310	868429	Fibroblast.47XYY-Fibroblast.46XY	120	13	-59.7029	Promoter (<=1kb)	Hypo	Sad1 and UNC84 domain containing 1	ENSG00000164828.Promoter	Promoter	Fibroblast	no		5782.08	0.168466	0.140565	1.19849	0.230726	0.462467	not sig
ENSG00000164855	TMEM184A	7	1562019	1562251	Fibroblast.47XYY-Fibroblast.46XY	233	21	-102.199	Promoter (1-2kb)	Hypo	transmembrane protein 184A	ENSG00000164855.Promoter	Promoter	Fibroblast	no
ENSG00000164877	MICALL2	7	1387749	1387866	Fibroblast.47XYY-Fibroblast.46XY	118	4	21.4939	Distal Intergenic	Hyper	MICAL like 2	ENSG00000164877.Intergenic	Intergenic	Fibroblast	no		1151.25	-0.171676	0.20762	-0.826877	0.408307	0.642812	not sig
ENSG00000164916	FOXK1	7	4690230	4690288	Fibroblast.47XYY-Fibroblast.46XY	59	8	40.616	Intron (ENST00000328914/ENSG00000164916, intron 1 of 8)	Hyper	forkhead box K1	ENSG00000164916.GeneBody	GeneBody	Fibroblast	no		2346.05	0.434267	0.122832	3.53546	0.000407069	0.00366528	not sig
ENSG00000164932	CTHRC1	8	103371923	103372063	Fibroblast.47XYY-Fibroblast.46XY	141	15	73.8151	Promoter (<=1kb)	Hyper	collagen triple helix repeat containing 1	ENSG00000164932.Promoter	Promoter	Fibroblast	no		8964.57	-0.242533	0.164782	-1.47185	0.141063	0.339708	not sig
ENSG00000164941	INTS8	8	94831528	94831642	Fibroblast.47XYY-Fibroblast.46XY	115	8	37.8972	Promoter (2-3kb)	Hyper	integrator complex subunit 8	ENSG00000164941.Promoter	Promoter	Fibroblast	no		1109.7	-0.101285	0.139861	-0.724183	0.468953	0.69007	not sig
ENSG00000164989	CCDC171	9	16076331	16076456	Fibroblast.47XYY-Fibroblast.46XY	126	5	27.6761	Distal Intergenic	Hyper	coiled-coil domain containing 171	ENSG00000164989.Intergenic	Intergenic	Fibroblast	no		102.979	-0.489834	0.192808	-2.54053	0.0110686	0.0540099	not sig
ENSG00000165006	UBAP1	9	34159680	34159816	Fibroblast.47XYY-Fibroblast.46XY	137	4	21.1972	Distal Intergenic	Hyper	ubiquitin associated protein 1	ENSG00000165006.Intergenic	Intergenic	Fibroblast	no		1886.68	0.132923	0.17104	0.777146	0.437073	0.665927	not sig
ENSG00000165091	TMC1	9	72837111	72837285	Fibroblast.47XYY-Fibroblast.46XY	175	6	41.8696	3' UTR	Hyper	transmembrane channel like 1	ENSG00000165091.GeneBody	GeneBody	Fibroblast	no
ENSG00000165105	RASEF	9	82932518	82932653	Fibroblast.47XYY-Fibroblast.46XY	136	13	66.808	Distal Intergenic	Hyper	RAS and EF-hand domain containing	ENSG00000165105.Intergenic	Intergenic	Fibroblast	no
ENSG00000165105	RASEF	9	82936890	82936962	Fibroblast.47XYY-Fibroblast.46XY	73	5	28.6299	Distal Intergenic	Hyper	RAS and EF-hand domain containing	ENSG00000165105.Intergenic	Intergenic	Fibroblast	no
ENSG00000165113	GKAP1	9	83808316	83808453	Fibroblast.47XYY-Fibroblast.46XY	138	6	31.1691	Intron (ENST00000376365/ENSG00000165113, intron 2 of 11)	Hyper	G kinase anchoring protein 1	ENSG00000165113.GeneBody	GeneBody	Fibroblast	no
ENSG00000165140	FBP1	9	94624056	94624194	Fibroblast.47XYY-Fibroblast.46XY	139	8	48.2461	Intron (ENST00000648117/ENSG00000165140, intron 1 of 5)	Hyper	fructose-bisphosphatase 1	ENSG00000165140.GeneBody	GeneBody	Fibroblast	no
ENSG00000165238	WNK2	9	93305777	93305960	Fibroblast.47XYY-Fibroblast.46XY	184	15	101.299	Promoter (<=1kb)	Hyper	WNK lysine deficient protein kinase 2	ENSG00000165238.Promoter	Promoter	Fibroblast	no
ENSG00000165271	NOL6	9	33470935	33471000	Fibroblast.47XYY-Fibroblast.46XY	66	5	24.9417	Promoter (1-2kb)	Hyper	nucleolar protein 6	ENSG00000165271.Promoter	Promoter	Fibroblast	no		2680.12	-0.177367	0.158943	-1.11592	0.264458	0.500606	not sig
ENSG00000165304	MELK	9	36628608	36628713	Fibroblast.47XYY-Fibroblast.46XY	106	4	18.0706	Promoter (1-2kb)	Hyper	maternal embryonic leucine zipper kinase	ENSG00000165304.Promoter	Promoter	Fibroblast	no		1486.72	-0.4018	0.251362	-1.59849	0.109935	0.289906	not sig
ENSG00000165392	WRN	8	31075432	31075613	Fibroblast.47XYY-Fibroblast.46XY	182	8	47.3107	Intron (ENST00000650667/ENSG00000165392, intron 6 of 33)	Hyper	WRN RecQ like helicase	ENSG00000165392.GeneBody	GeneBody	Fibroblast	no		1034.01	-0.119838	0.137705	-0.870254	0.384162	0.621557	not sig
ENSG00000165406	MARCHF8	10	45595625	45595759	Fibroblast.47XYY-Fibroblast.46XY	135	10	65.791	Promoter (<=1kb)	Hyper	membrane associated ring-CH-type finger 8	ENSG00000165406.Promoter	Promoter	Fibroblast	no		1280.18	0.0642962	0.21631	0.297241	0.766282	0.884093	not sig
ENSG00000165495	PKNOX2	11	125167365	125167512	Fibroblast.47XYY-Fibroblast.46XY	148	14	-77.4844	Promoter (2-3kb)	Hypo	PBX/knotted 1 homeobox 2	ENSG00000165495.Promoter	Promoter	Fibroblast	no
ENSG00000165495	PKNOX2	11	125245430	125245578	Fibroblast.47XYY-Fibroblast.46XY	149	8	38.1728	Intron (ENST00000530517/ENSG00000165495, intron 2 of 11)	Hyper	PBX/knotted 1 homeobox 2	ENSG00000165495.GeneBody	GeneBody	Fibroblast	no
ENSG00000165548	TMEM63C	14	77254197	77254250	Fibroblast.47XYY-Fibroblast.46XY	54	8	33.6773	Promoter (2-3kb)	Hyper	transmembrane protein 63C	ENSG00000165548.Promoter	Promoter	Fibroblast	no
ENSG00000165643	SOHLH1	9	135698306	135698417	Fibroblast.47XYY-Fibroblast.46XY	112	15	65.8972	Promoter (1-2kb)	Hyper	spermatogenesis and oogenesis specific basic helix-loop-helix 1	ENSG00000165643.Promoter	Promoter	Fibroblast	no
ENSG00000165643	SOHLH1	9	135699148	135699299	Fibroblast.47XYY-Fibroblast.46XY	152	13	85.1767	Promoter (<=1kb)	Hyper	spermatogenesis and oogenesis specific basic helix-loop-helix 1	ENSG00000165643.Promoter	Promoter	Fibroblast	no
ENSG00000165671	NSD1	5	177131967	177132107	Fibroblast.47XYY-Fibroblast.46XY	141	27	-130.148	Promoter (<=1kb)	Hypo	nuclear receptor binding SET domain protein 1	ENSG00000165671.Promoter	Promoter	Fibroblast	no		4784.35	-0.189189	0.123628	-1.53031	0.125941	0.31459	not sig
ENSG00000165672	PRDX3	10	119190872	119191021	Fibroblast.47XYY-Fibroblast.46XY	150	5	42.4219	Distal Intergenic	Hyper	peroxiredoxin 3	ENSG00000165672.Intergenic	Intergenic	Fibroblast	no		4635.33	-0.170437	0.163201	-1.04433	0.296331	0.536023	not sig
ENSG00000165716	DIPK1B	9	136713972	136714074	Fibroblast.47XYY-Fibroblast.46XY	103	4	18.2054	Promoter (1-2kb)	Hyper	divergent protein kinase domain 1B	ENSG00000165716.Promoter	Promoter	Fibroblast	no
ENSG00000165716	DIPK1B	9	136719267	136719419	Fibroblast.47XYY-Fibroblast.46XY	153	8	39.8569	Promoter (1-2kb)	Hyper	divergent protein kinase domain 1B	ENSG00000165716.Promoter	Promoter	Fibroblast	no
ENSG00000165752	STK32C	10	132272349	132272506	Fibroblast.47XYY-Fibroblast.46XY	158	13	68.1401	Intron (ENST00000368622/ENSG00000165752, intron 1 of 11)	Hyper	serine/threonine kinase 32C	ENSG00000165752.GeneBody	GeneBody	Fibroblast	no		352.88	-0.145281	0.123474	-1.17661	0.239349	0.471876	not sig
ENSG00000165757	JCAD	10	30010222	30010357	Fibroblast.47XYY-Fibroblast.46XY	136	6	28.0123	Distal Intergenic	Hyper	junctional cadherin 5 associated	ENSG00000165757.Intergenic	Intergenic	Fibroblast	no		8933.8	-0.0607796	0.213603	-0.284544	0.775993	0.889628	not sig
ENSG00000165804	ZNF219	14	21092370	21092481	Fibroblast.47XYY-Fibroblast.46XY	112	15	94.3291	Promoter (1-2kb)	Hyper	zinc finger protein 219	ENSG00000165804.Promoter	Promoter	Fibroblast	no		476.292	-0.304782	0.269293	-1.13179	0.257724	0.493373	not sig
ENSG00000165837	ERICH6B	13	45588806	45588936	Fibroblast.47XYY-Fibroblast.46XY	131	4	18.9132	Intron (ENST00000298738/ENSG00000165837, intron 4 of 14)	Hyper	glutamate rich 6B	ENSG00000165837.GeneBody	GeneBody	Fibroblast	no
ENSG00000165879	FRAT1	10	97316411	97316466	Fibroblast.47XYY-Fibroblast.46XY	56	5	28.9147	Promoter (2-3kb)	Hyper	FRAT regulator of WNT signaling pathway 1	ENSG00000165879.Promoter	Promoter	Fibroblast	no
ENSG00000165915	SLC39A13	11	47417874	47418078	Fibroblast.47XYY-Fibroblast.46XY	205	6	37.8974	Distal Intergenic	Hyper	solute carrier family 39 member 13	ENSG00000165915.Intergenic	Intergenic	Fibroblast	no		6113.64	-0.168062	0.178915	-0.939342	0.347555	0.587487	not sig
ENSG00000165934	CPSF2	14	92186066	92186181	Fibroblast.47XYY-Fibroblast.46XY	116	9	44.1382	Distal Intergenic	Hyper	cleavage and polyadenylation specific factor 2	ENSG00000165934.Intergenic	Intergenic	Fibroblast	no		3415.66	-0.11936	0.168139	-0.709886	0.477775	0.697356	not sig
ENSG00000166035	LIPC	15	58409646	58409738	Fibroblast.47XYY-Fibroblast.46XY	93	5	24.5922	Promoter (<=1kb)	Hyper	lipase C, hepatic type	ENSG00000166035.Promoter	Promoter	Fibroblast	no		87.1479	0.621287	0.638789	0.9726	0.330752	0.5708	not sig
ENSG00000166123	GPT2	16	46930952	46931076	Fibroblast.47XYY-Fibroblast.46XY	125	6	29.2892	3' UTR	Hyper	glutamic--pyruvic transaminase 2	ENSG00000166123.GeneBody	GeneBody	Fibroblast	no		1476.8	0.41699	0.244869	1.70291	0.088585	0.250507	not sig
ENSG00000166126	AMN	14	102928211	102928294	Fibroblast.47XYY-Fibroblast.46XY	84	12	-65.1949	Promoter (<=1kb)	Hypo	amnion associated transmembrane protein	ENSG00000166126.Promoter	Promoter	Fibroblast	no
ENSG00000166126	AMN	14	102928017	102928152	Fibroblast.47XYY-Fibroblast.46XY	136	18	-93.6688	Promoter (<=1kb)	Hypo	amnion associated transmembrane protein	ENSG00000166126.Promoter	Promoter	Fibroblast	no
ENSG00000166183	ASPG	14	104096711	104096881	Fibroblast.47XYY-Fibroblast.46XY	171	6	35.2254	Intron (ENST00000548372/ENSG00000166183, intron 3 of 10)	Hyper	asparaginase	ENSG00000166183.GeneBody	GeneBody	Fibroblast	no
ENSG00000166183	ASPG	14	104111930	104112098	Fibroblast.47XYY-Fibroblast.46XY	169	12	81.5652	Promoter (<=1kb)	Hyper	asparaginase	ENSG00000166183.Promoter	Promoter	Fibroblast	no
ENSG00000166197	NOLC1	10	102175256	102175402	Fibroblast.47XYY-Fibroblast.46XY	147	12	54.6795	Distal Intergenic	Hyper	nucleolar and coiled-body phosphoprotein 1	ENSG00000166197.Intergenic	Intergenic	Fibroblast	no		3328.35	-0.0903178	0.188059	-0.480264	0.63104	0.804654	not sig
ENSG00000166265	CYYR1	21	26627126	26627260	Fibroblast.47XYY-Fibroblast.46XY	135	10	60.6076	Distal Intergenic	Hyper	cysteine and tyrosine rich 1	ENSG00000166265.Intergenic	Intergenic	Fibroblast	no		80.2529	0.51644	0.292381	1.76633	0.077341	0.228986	not sig
ENSG00000166359	WDR88	19	33144155	33144292	Fibroblast.47XYY-Fibroblast.46XY	138	17	69.5884	Intron (ENST00000592765/ENSG00000166359, intron 3 of 5)	Hyper	WD repeat domain 88	ENSG00000166359.GeneBody	GeneBody	Fibroblast	no
ENSG00000166377	ATP9B	18	79045302	79045360	Fibroblast.47XYY-Fibroblast.46XY	59	4	18.4228	Distal Intergenic	Hyper	ATPase phospholipid transporting 9B (putative)	ENSG00000166377.Intergenic	Intergenic	Fibroblast	no		622.487	-0.200664	0.122766	-1.63452	0.102149	0.276153	not sig
ENSG00000166377	ATP9B	18	79155922	79156057	Fibroblast.47XYY-Fibroblast.46XY	136	10	58.685	Promoter (1-2kb)	Hyper	ATPase phospholipid transporting 9B (putative)	ENSG00000166377.Promoter	Promoter	Fibroblast	no		622.487	-0.200664	0.122766	-1.63452	0.102149	0.276153	not sig
ENSG00000166377	ATP9B	18	79046414	79046471	Fibroblast.47XYY-Fibroblast.46XY	58	5	29.1135	Distal Intergenic	Hyper	ATPase phospholipid transporting 9B (putative)	ENSG00000166377.Intergenic	Intergenic	Fibroblast	no		622.487	-0.200664	0.122766	-1.63452	0.102149	0.276153	not sig
ENSG00000166407	LMO1	11	8315348	8315437	Fibroblast.47XYY-Fibroblast.46XY	90	9	40.0838	Distal Intergenic	Hyper	LIM domain only 1	ENSG00000166407.Intergenic	Intergenic	Fibroblast	no
ENSG00000166407	LMO1	11	8218655	8218779	Fibroblast.47XYY-Fibroblast.46XY	125	4	18.7672	Distal Intergenic	Hyper	LIM domain only 1	ENSG00000166407.Intergenic	Intergenic	Fibroblast	no
ENSG00000166415	WDR72	15	53510373	53510445	Fibroblast.47XYY-Fibroblast.46XY	73	7	30.9824	Distal Intergenic	Hyper	WD repeat domain 72	ENSG00000166415.Intergenic	Intergenic	Fibroblast	no
ENSG00000166428	PLD4	14	104932509	104932618	Fibroblast.47XYY-Fibroblast.46XY	110	12	-57.6132	Promoter (<=1kb)	Hypo	phospholipase D family member 4	ENSG00000166428.Promoter	Promoter	Fibroblast	no
ENSG00000166479	TMX3	18	68667435	68667574	Fibroblast.47XYY-Fibroblast.46XY	140	6	35.5205	Distal Intergenic	Hyper	thioredoxin related transmembrane protein 3	ENSG00000166479.Intergenic	Intergenic	Fibroblast	no		5544.53	-0.509499	0.0869591	-5.85906	4.65485e-09	1.44333e-07	not sig
ENSG00000166501	PRKCB	16	24023528	24023656	Fibroblast.47XYY-Fibroblast.46XY	129	8	43.7175	Intron (ENST00000321728/ENSG00000166501, intron 3 of 16)	Hyper	protein kinase C beta	ENSG00000166501.GeneBody	GeneBody	Fibroblast	no
ENSG00000166509	CLEC3A	16	77964950	77965081	Fibroblast.47XYY-Fibroblast.46XY	132	8	43.7141	Intron (ENST00000302536/ENSG00000171724, intron 7 of 8)	Hyper	C-type lectin domain family 3 member A	ENSG00000166509.GeneBody	GeneBody	Fibroblast	no
ENSG00000166548	TK2	16	66511278	66511417	Fibroblast.47XYY-Fibroblast.46XY	140	4	22.0477	Promoter (<=1kb)	Hyper	thymidine kinase 2	ENSG00000166548.Promoter	Promoter	Fibroblast	no		1367.74	-0.550965	0.117353	-4.69494	2.66682e-06	4.48739e-05	not sig
ENSG00000166592	RRAD	16	66922276	66922339	Fibroblast.47XYY-Fibroblast.46XY	64	8	-37.4839	Promoter (1-2kb)	Hypo	RRAD, Ras related glycolysis inhibitor and calcium channel regulator	ENSG00000166592.Promoter	Promoter	Fibroblast	no
ENSG00000166669	ATF7IP2	16	10370900	10371028	Fibroblast.47XYY-Fibroblast.46XY	129	4	25.2954	Intron (ENST00000564797/ENSG00000166669, intron 2 of 4)	Hyper	activating transcription factor 7 interacting protein 2	ENSG00000166669.GeneBody	GeneBody	Fibroblast	no		79.4012	0.153492	0.419772	0.365655	0.714623	0.852816	not sig
ENSG00000166685	COG1	17	73196573	73196705	Fibroblast.47XYY-Fibroblast.46XY	133	10	59.6051	3' UTR	Hyper	component of oligomeric golgi complex 1	ENSG00000166685.GeneBody	GeneBody	Fibroblast	no		1370.94	0.0273345	0.151267	0.180704	0.8566	0.929731	not sig
ENSG00000166689	PLEKHA7	11	17013183	17013386	Fibroblast.47XYY-Fibroblast.46XY	204	14	-70.2411	Promoter (<=1kb)	Hypo	pleckstrin homology domain containing A7	ENSG00000166689.Promoter	Promoter	Fibroblast	no		62.7253	-1.23051	0.610509	-2.01555	0.0438473	0.151896	not sig
ENSG00000166689	PLEKHA7	11	17013444	17013579	Fibroblast.47XYY-Fibroblast.46XY	136	10	-53.5138	Promoter (<=1kb)	Hypo	pleckstrin homology domain containing A7	ENSG00000166689.Promoter	Promoter	Fibroblast	no		62.7253	-1.23051	0.610509	-2.01555	0.0438473	0.151896	not sig
ENSG00000166747	AP1G1	16	71817236	71817335	Fibroblast.47XYY-Fibroblast.46XY	100	9	54.125	Distal Intergenic	Hyper	adaptor related protein complex 1 subunit gamma 1	ENSG00000166747.Intergenic	Intergenic	Fibroblast	no		4984.93	-0.267129	0.147165	-1.81516	0.0694987	0.212207	not sig
ENSG00000166855	CLPX	15	65151065	65151201	Fibroblast.47XYY-Fibroblast.46XY	137	6	33.1589	Intron (ENST00000300107/ENSG00000166855, intron 13 of 13)	Hyper	caseinolytic mitochondrial matrix peptidase chaperone subunit X	ENSG00000166855.GeneBody	GeneBody	Fibroblast	no		1787.3	-0.0370822	0.161457	-0.229673	0.818346	0.908669	not sig
ENSG00000166862	CACNG2	22	36661087	36661180	Fibroblast.47XYY-Fibroblast.46XY	94	8	-35.7553	Intron (ENST00000300105/ENSG00000166862, intron 1 of 3)	Hypo	calcium voltage-gated channel auxiliary subunit gamma 2	ENSG00000166862.GeneBody	GeneBody	Fibroblast	no
ENSG00000166900	STX3	11	59713027	59713157	Fibroblast.47XYY-Fibroblast.46XY	131	4	25.5771	Promoter (<=1kb)	Hyper	syntaxin 3	ENSG00000166900.Promoter	Promoter	Fibroblast	no		954.954	-0.0291774	0.211007	-0.138277	0.890022	0.947019	not sig
ENSG00000166938	DIS3L	15	66303812	66304014	Fibroblast.47XYY-Fibroblast.46XY	203	22	157.426	Promoter (2-3kb)	Hyper	DIS3 like exosome 3'-5' exoribonuclease	ENSG00000166938.Promoter	Promoter	Fibroblast	no		1183.51	-0.323396	0.173538	-1.86354	0.0623856	0.196059	not sig
ENSG00000166948	TGM6	20	2421078	2421136	Fibroblast.47XYY-Fibroblast.46XY	59	6	24.6163	Intron (ENST00000202625/ENSG00000166948, intron 10 of 12)	Hyper	transglutaminase 6	ENSG00000166948.GeneBody	GeneBody	Fibroblast	no
ENSG00000166949	SMAD3	15	67138115	67138357	Fibroblast.47XYY-Fibroblast.46XY	243	12	72.4592	Promoter (<=1kb)	Hyper	SMAD family member 3	ENSG00000166949.Promoter	Promoter	Fibroblast	no		4624.37	0.249628	0.222077	1.12406	0.260986	0.497239	not sig
ENSG00000167100	SAMD14	17	50112936	50113020	Fibroblast.47XYY-Fibroblast.46XY	85	12	45.7864	Promoter (2-3kb)	Hyper	sterile alpha motif domain containing 14	ENSG00000167100.Promoter	Promoter	Fibroblast	no		321.023	2.21638	0.238895	9.27765	1.73251e-20	3.05917e-18	up
ENSG00000167106	EEIG1	9	127975093	127975261	Fibroblast.47XYY-Fibroblast.46XY	169	11	54.6466	Intron (ENST00000373095/ENSG00000167106, intron 1 of 10)	Hyper	estrogen-induced osteoclastogenesis regulator 1	ENSG00000167106.GeneBody	GeneBody	Fibroblast	no		1838.59	-0.0545472	0.153637	-0.35504	0.72256	0.857375	not sig
ENSG00000167123	CERCAM	9	128412944	128413072	Fibroblast.47XYY-Fibroblast.46XY	129	8	50.9385	Promoter (1-2kb)	Hyper	cerebral endothelial cell adhesion molecule	ENSG00000167123.Promoter	Promoter	Fibroblast	no		19942.9	-0.373341	0.163157	-2.28824	0.0221236	0.0916657	not sig
ENSG00000167191	GPRC5B	16	19864680	19864904	Fibroblast.47XYY-Fibroblast.46XY	225	6	34.4758	Promoter (2-3kb)	Hyper	G protein-coupled receptor class C group 5 member B	ENSG00000167191.Promoter	Promoter	Fibroblast	no		182.25	-0.127039	0.404322	-0.314203	0.753367	0.876682	not sig
ENSG00000167194	C16orf92	16	30025213	30025331	Fibroblast.47XYY-Fibroblast.46XY	119	14	57.3249	Promoter (1-2kb)	Hyper	chromosome 16 open reading frame 92	ENSG00000167194.Promoter	Promoter	Fibroblast	no
ENSG00000167207	NOD2	16	50712140	50712279	Fibroblast.47XYY-Fibroblast.46XY	140	11	71.4823	Promoter (<=1kb)	Hyper	nucleotide binding oligomerization domain containing 2	ENSG00000167207.Promoter	Promoter	Fibroblast	no
ENSG00000167258	CDK12	17	39460854	39460930	Fibroblast.47XYY-Fibroblast.46XY	77	15	86.205	Promoter (<=1kb)	Hyper	cyclin dependent kinase 12	ENSG00000167258.Promoter	Promoter	Fibroblast	no		3018.12	-0.132958	0.136839	-0.971641	0.331229	0.571247	not sig
ENSG00000167264	DUS2	16	68030307	68030450	Fibroblast.47XYY-Fibroblast.46XY	144	8	51.8403	Intron (ENST00000571081/ENSG00000167264, intron 2 of 4)	Hyper	dihydrouridine synthase 2	ENSG00000167264.GeneBody	GeneBody	Fibroblast	no		479.833	-0.196067	0.199601	-0.982295	0.325954	0.565537	not sig
ENSG00000167280	ENGASE	17	79086932	79086988	Fibroblast.47XYY-Fibroblast.46XY	57	10	46.0762	Promoter (1-2kb)	Hyper	endo-beta-N-acetylglucosaminidase	ENSG00000167280.Promoter	Promoter	Fibroblast	no		849.416	0.0931982	0.178346	0.522571	0.601273	0.784645	not sig
ENSG00000167281	RBFOX3	17	79228261	79228382	Fibroblast.47XYY-Fibroblast.46XY	122	16	82.4439	Intron (ENST00000583458/ENSG00000167281, intron 3 of 13)	Hyper	RNA binding fox-1 homolog 3	ENSG00000167281.GeneBody	GeneBody	Fibroblast	no
ENSG00000167281	RBFOX3	17	79248533	79248659	Fibroblast.47XYY-Fibroblast.46XY	127	7	37.1901	Intron (ENST00000583458/ENSG00000167281, intron 2 of 13)	Hyper	RNA binding fox-1 homolog 3	ENSG00000167281.GeneBody	GeneBody	Fibroblast	no
ENSG00000167281	RBFOX3	17	79390252	79390448	Fibroblast.47XYY-Fibroblast.46XY	197	15	110.714	Intron (ENST00000583458/ENSG00000167281, intron 1 of 13)	Hyper	RNA binding fox-1 homolog 3	ENSG00000167281.GeneBody	GeneBody	Fibroblast	no
ENSG00000167281	RBFOX3	17	79336124	79336243	Fibroblast.47XYY-Fibroblast.46XY	120	6	32.9432	Intron (ENST00000583458/ENSG00000167281, intron 1 of 13)	Hyper	RNA binding fox-1 homolog 3	ENSG00000167281.GeneBody	GeneBody	Fibroblast	no
ENSG00000167281	RBFOX3	17	79520195	79520301	Fibroblast.47XYY-Fibroblast.46XY	107	10	45.6267	Distal Intergenic	Hyper	RNA binding fox-1 homolog 3	ENSG00000167281.Intergenic	Intergenic	Fibroblast	no
ENSG00000167281	RBFOX3	17	79510104	79510245	Fibroblast.47XYY-Fibroblast.46XY	142	10	50.0569	Promoter (1-2kb)	Hyper	RNA binding fox-1 homolog 3	ENSG00000167281.Promoter	Promoter	Fibroblast	no
ENSG00000167281	RBFOX3	17	79344175	79344384	Fibroblast.47XYY-Fibroblast.46XY	210	4	21.0501	Intron (ENST00000583458/ENSG00000167281, intron 1 of 13)	Hyper	RNA binding fox-1 homolog 3	ENSG00000167281.GeneBody	GeneBody	Fibroblast	no
ENSG00000167291	TBC1D16	17	79950811	79950885	Fibroblast.47XYY-Fibroblast.46XY	75	7	-34.8088	Promoter (<=1kb)	Hypo	TBC1 domain family member 16	ENSG00000167291.Promoter	Promoter	Fibroblast	no		2905.3	-0.555131	0.228299	-2.43159	0.0150326	0.0682452	not sig
ENSG00000167306	MYO5B	18	49886099	49886230	Fibroblast.47XYY-Fibroblast.46XY	132	4	27.1757	Intron (ENST00000285039/ENSG00000167306, intron 22 of 39)	Hyper	myosin VB	ENSG00000167306.GeneBody	GeneBody	Fibroblast	no
ENSG00000167393	PPP2R3B	X	373121	373207	Fibroblast.47XYY-Fibroblast.46XY	87	10	-46.6599	Promoter (<=1kb)	Hypo	protein phosphatase 2 regulatory subunit B''beta	ENSG00000167393.Promoter	Promoter	Fibroblast	PAR1	PAR	651.01	0.7037	0.132425	5.31394	1.07279e-07	2.46015e-06	up
ENSG00000167460	TPM4	19	16073438	16073516	Fibroblast.47XYY-Fibroblast.46XY	79	4	-20.2099	Promoter (2-3kb)	Hypo	tropomyosin 4	ENSG00000167460.Promoter	Promoter	Fibroblast	no		113478	0.0985767	0.121601	0.810659	0.417562	0.651965	not sig
ENSG00000167460	TPM4	19	16082712	16082771	Fibroblast.47XYY-Fibroblast.46XY	60	5	26.2753	Promoter (1-2kb)	Hyper	tropomyosin 4	ENSG00000167460.Promoter	Promoter	Fibroblast	no		113478	0.0985767	0.121601	0.810659	0.417562	0.651965	not sig
ENSG00000167460	TPM4	19	16087316	16087433	Fibroblast.47XYY-Fibroblast.46XY	118	4	21.3469	Promoter (<=1kb)	Hyper	tropomyosin 4	ENSG00000167460.Promoter	Promoter	Fibroblast	no		113478	0.0985767	0.121601	0.810659	0.417562	0.651965	not sig
ENSG00000167461	RAB8A	19	16117209	16117345	Fibroblast.47XYY-Fibroblast.46XY	137	6	38.4999	Intron (ENST00000300935/ENSG00000167461, intron 1 of 7)	Hyper	RAB8A, member RAS oncogene family	ENSG00000167461.GeneBody	GeneBody	Fibroblast	no		963.588	-0.0472392	0.185554	-0.254584	0.799044	0.900627	not sig
ENSG00000167468	GPX4	19	1103022	1103129	Fibroblast.47XYY-Fibroblast.46XY	108	8	41.4654	Promoter (<=1kb)	Hyper	glutathione peroxidase 4	ENSG00000167468.Promoter	Promoter	Fibroblast	no		4909.44	-0.473163	0.229529	-2.06145	0.0392598	0.140158	not sig
ENSG00000167476	JSRP1	19	2268262	2268363	Fibroblast.47XYY-Fibroblast.46XY	102	15	71.343	Promoter (1-2kb)	Hyper	junctional sarcoplasmic reticulum protein 1	ENSG00000167476.Promoter	Promoter	Fibroblast	no
ENSG00000167476	JSRP1	19	2253729	2254121	Fibroblast.47XYY-Fibroblast.46XY	393	50	-195.46	Promoter (2-3kb)	Hypo	junctional sarcoplasmic reticulum protein 1	ENSG00000167476.Promoter	Promoter	Fibroblast	no
ENSG00000167487	KLHL26	19	18660316	18660402	Fibroblast.47XYY-Fibroblast.46XY	87	11	51.114	Intron (ENST00000595182/ENSG00000167487, intron 1 of 2)	Hyper	kelch like family member 26	ENSG00000167487.GeneBody	GeneBody	Fibroblast	no		188.98	-0.897417	0.243056	-3.69222	0.000222309	0.00216875	down
ENSG00000167491	GATAD2A	19	19379425	19380102	Fibroblast.47XYY-Fibroblast.46XY	678	8	42.1247	Distal Intergenic	Hyper	GATA zinc finger domain containing 2A	ENSG00000167491.Intergenic	Intergenic	Fibroblast	no		3910.83	-0.313277	0.180736	-1.73334	0.0830352	0.239898	not sig
ENSG00000167522	ANKRD11	16	89359592	89359652	Fibroblast.47XYY-Fibroblast.46XY	61	4	14.8652	Intron (ENST00000378330/ENSG00000167522, intron 3 of 13)	Hyper	ankyrin repeat domain containing 11	ENSG00000167522.GeneBody	GeneBody	Fibroblast	no		10613	0.165897	0.143088	1.15941	0.246289	0.47997	not sig
ENSG00000167535	CACNB3	12	48813018	48813068	Fibroblast.47XYY-Fibroblast.46XY	51	5	-21.5558	Promoter (<=1kb)	Hypo	calcium voltage-gated channel auxiliary subunit beta 3	ENSG00000167535.Promoter	Promoter	Fibroblast	no		1391.17	-0.111985	0.114738	-0.976001	0.329064	0.569002	not sig
ENSG00000167615	LENG8	19	54450363	54450415	Fibroblast.47XYY-Fibroblast.46XY	53	6	29.9283	Promoter (<=1kb)	Hyper	leukocyte receptor cluster member 8	ENSG00000167615.Promoter	Promoter	Fibroblast	no		13120.8	0.114827	0.204692	0.560974	0.574815	0.76702	not sig
ENSG00000167632	TRAPPC9	8	139797297	139797352	Fibroblast.47XYY-Fibroblast.46XY	56	9	49.4699	Intron (ENST00000438773/ENSG00000167632, intron 21 of 22)	Hyper	trafficking protein particle complex subunit 9	ENSG00000167632.GeneBody	GeneBody	Fibroblast	no		750.69	-0.103047	0.119089	-0.865289	0.38688	0.623816	not sig
ENSG00000167674	HDGFL2	19	4507813	4507865	Fibroblast.47XYY-Fibroblast.46XY	53	5	19.4121	Intron (ENST00000301286/ENSG00000167676, intron 4 of 5)	Hyper	HDGF like 2	ENSG00000167674.GeneBody	GeneBody	Fibroblast	no		3242.91	0.150477	0.128319	1.17268	0.240924	0.473321	not sig
ENSG00000167693	NXN	17	901012	901269	Fibroblast.47XYY-Fibroblast.46XY	258	21	116.706	Intron (ENST00000336868/ENSG00000167693, intron 1 of 7)	Hyper	nucleoredoxin	ENSG00000167693.GeneBody	GeneBody	Fibroblast	no		5180.68	-0.175362	0.152621	-1.149	0.250555	0.484708	not sig
ENSG00000167703	SLC43A2	17	1605107	1605272	Fibroblast.47XYY-Fibroblast.46XY	166	13	-74.5546	Promoter (<=1kb)	Hypo	solute carrier family 43 member 2	ENSG00000167703.Promoter	Promoter	Fibroblast	no		144.77	-0.87864	0.228136	-3.8514	0.000117446	0.00125819	down
ENSG00000167703	SLC43A2	17	1634595	1634689	Fibroblast.47XYY-Fibroblast.46XY	95	5	27.3784	3' UTR	Hyper	solute carrier family 43 member 2	ENSG00000167703.GeneBody	GeneBody	Fibroblast	no		144.77	-0.87864	0.228136	-3.8514	0.000117446	0.00125819	down
ENSG00000167703	SLC43A2	17	1594119	1594225	Fibroblast.47XYY-Fibroblast.46XY	107	8	44.9689	Intron (ENST00000301335/ENSG00000167703, intron 5 of 13)	Hyper	solute carrier family 43 member 2	ENSG00000167703.GeneBody	GeneBody	Fibroblast	no		144.77	-0.87864	0.228136	-3.8514	0.000117446	0.00125819	down
ENSG00000167723	TRPV3	17	3557898	3557949	Fibroblast.47XYY-Fibroblast.46XY	52	5	26.004	Promoter (<=1kb)	Hyper	transient receptor potential cation channel subfamily V member 3	ENSG00000167723.Promoter	Promoter	Fibroblast	no		77.6899	-0.458708	0.271365	-1.69038	0.0909559	0.25492	not sig
ENSG00000167723	TRPV3	17	3557745	3557812	Fibroblast.47XYY-Fibroblast.46XY	68	7	31.4225	Promoter (<=1kb)	Hyper	transient receptor potential cation channel subfamily V member 3	ENSG00000167723.Promoter	Promoter	Fibroblast	no		77.6899	-0.458708	0.271365	-1.69038	0.0909559	0.25492	not sig
ENSG00000167861	HID1	17	74952253	74952411	Fibroblast.47XYY-Fibroblast.46XY	159	20	-93.4576	Promoter (2-3kb)	Hypo	HID1 domain containing	ENSG00000167861.Promoter	Promoter	Fibroblast	no
ENSG00000167880	EVPL	17	76022665	76022740	Fibroblast.47XYY-Fibroblast.46XY	76	5	26.8423	Intron (ENST00000301607/ENSG00000167880, intron 4 of 21)	Hyper	envoplakin	ENSG00000167880.GeneBody	GeneBody	Fibroblast	no
ENSG00000167912	TOX-DT	8	59120272	59120383	Fibroblast.47XYY-Fibroblast.46XY	112	7	-33.0544	Promoter (<=1kb)	Hypo	TOX divergent transcript	ENSG00000167912.Promoter	Promoter	Fibroblast	no		57.5512	-0.935199	0.315435	-2.9648	0.00302883	0.0193181	down
ENSG00000167941	SOST	17	43755305	43755565	Fibroblast.47XYY-Fibroblast.46XY	261	46	-218.97	3' UTR	Hypo	sclerostin	ENSG00000167941.GeneBody	GeneBody	Fibroblast	no
ENSG00000167964	RAB26	16	2147993	2148125	Fibroblast.47XYY-Fibroblast.46XY	133	17	-83.2365	Promoter (<=1kb)	Hypo	RAB26, member RAS oncogene family	ENSG00000167964.Promoter	Promoter	Fibroblast	no
ENSG00000167972	ABCA3	16	2285099	2285208	Fibroblast.47XYY-Fibroblast.46XY	110	10	46.6393	Promoter (1-2kb)	Hyper	ATP binding cassette subfamily A member 3	ENSG00000167972.Promoter	Promoter	Fibroblast	no		54.6232	1.15051	0.306595	3.75255	0.000175043	0.0017704	up
ENSG00000167986	DDB1	11	61331845	61332035	Fibroblast.47XYY-Fibroblast.46XY	191	6	29.3002	Promoter (<=1kb)	Hyper	damage specific DNA binding protein 1	ENSG00000167986.Promoter	Promoter	Fibroblast	no		12905.5	-0.11878	0.15225	-0.780165	0.435294	0.664717	not sig
ENSG00000167995	BEST1	11	61944717	61944789	Fibroblast.47XYY-Fibroblast.46XY	73	5	22.668	Distal Intergenic	Hyper	bestrophin 1	ENSG00000167995.Intergenic	Intergenic	Fibroblast	no		303.383	-0.393383	0.244253	-1.61056	0.107276	0.285399	not sig
ENSG00000168065	SLC22A11	11	64554466	64554674	Fibroblast.47XYY-Fibroblast.46XY	209	12	62.4878	Promoter (1-2kb)	Hyper	solute carrier family 22 member 11	ENSG00000168065.Promoter	Promoter	Fibroblast	no
ENSG00000168071	CCDC88B	11	64344144	64344268	Fibroblast.47XYY-Fibroblast.46XY	125	6	35.7782	Promoter (<=1kb)	Hyper	coiled-coil domain containing 88B	ENSG00000168071.Promoter	Promoter	Fibroblast	no
ENSG00000168079	SCARA5	8	27959575	27959691	Fibroblast.47XYY-Fibroblast.46XY	117	4	23.2084	Intron (ENST00000354914/ENSG00000168079, intron 3 of 8)	Hyper	scavenger receptor class A member 5	ENSG00000168079.GeneBody	GeneBody	Fibroblast	no
ENSG00000168140	VASN	16	4370898	4370957	Fibroblast.47XYY-Fibroblast.46XY	60	4	21.339	Promoter (<=1kb)	Hyper	vasorin	ENSG00000168140.Promoter	Promoter	Fibroblast	no		5091.78	-0.936944	0.182811	-5.1252	2.97229e-07	6.19259e-06	down
ENSG00000168216	LMBRD1	6	69601117	69601302	Fibroblast.47XYY-Fibroblast.46XY	186	13	69.36	Distal Intergenic	Hyper	LMBR1 domain containing 1	ENSG00000168216.Intergenic	Intergenic	Fibroblast	no		1346.97	-0.043729	0.156266	-0.279836	0.779603	0.891257	not sig
ENSG00000168229	PTGDR	14	52266980	52267094	Fibroblast.47XYY-Fibroblast.46XY	115	4	30.2582	Promoter (<=1kb)	Hyper	prostaglandin D2 receptor	ENSG00000168229.Promoter	Promoter	Fibroblast	no
ENSG00000168243	GNG4	1	235643054	235643128	Fibroblast.47XYY-Fibroblast.46XY	75	7	27.7307	Intron (ENST00000391854/ENSG00000168243, intron 1 of 3)	Hyper	G protein subunit gamma 4	ENSG00000168243.GeneBody	GeneBody	Fibroblast	no
ENSG00000168389	MFSD2A	1	39969724	39969822	Fibroblast.47XYY-Fibroblast.46XY	99	4	-22.028	Promoter (2-3kb)	Hypo	major facilitator superfamily domain containing 2A	ENSG00000168389.Promoter	Promoter	Fibroblast	no		140.687	-0.0847336	0.271373	-0.312241	0.754858	0.877258	not sig
ENSG00000168569	TMEM223	11	62790851	62790906	Fibroblast.47XYY-Fibroblast.46XY	56	9	41.2702	Promoter (<=1kb)	Hyper	transmembrane protein 223	ENSG00000168569.Promoter	Promoter	Fibroblast	no		313.705	0.0390199	0.142342	0.274129	0.783986	0.892884	not sig
ENSG00000168621	GDNF	5	37836164	37836326	Fibroblast.47XYY-Fibroblast.46XY	163	10	-46.445	Promoter (<=1kb)	Hypo	glial cell derived neurotrophic factor	ENSG00000168621.Promoter	Promoter	Fibroblast	no		1068.18	-0.0313487	0.342989	-0.0913987	0.927176	0.965625	not sig
ENSG00000168621	GDNF	5	37834696	37834929	Fibroblast.47XYY-Fibroblast.46XY	234	49	-226.508	Promoter (<=1kb)	Hypo	glial cell derived neurotrophic factor	ENSG00000168621.Promoter	Promoter	Fibroblast	no		1068.18	-0.0313487	0.342989	-0.0913987	0.927176	0.965625	not sig
ENSG00000168675	LDLRAD4	18	13375035	13375229	Fibroblast.47XYY-Fibroblast.46XY	195	8	38.5086	Intron (ENST00000590371/ENSG00000168675, intron 2 of 2)	Hyper	low density lipoprotein receptor class A domain containing 4	ENSG00000168675.GeneBody	GeneBody	Fibroblast	no		179.029	-0.827617	0.302269	-2.73802	0.00618109	0.0342813	down
ENSG00000168675	LDLRAD4	18	13542286	13542348	Fibroblast.47XYY-Fibroblast.46XY	63	5	27.9513	Promoter (<=1kb)	Hyper	low density lipoprotein receptor class A domain containing 4	ENSG00000168675.Promoter	Promoter	Fibroblast	no		179.029	-0.827617	0.302269	-2.73802	0.00618109	0.0342813	down
ENSG00000168754	FAM178B	2	96991499	96991615	Fibroblast.47XYY-Fibroblast.46XY	117	12	70.3882	Distal Intergenic	Hyper	family with sequence similarity 178 member B	ENSG00000168754.Intergenic	Intergenic	Fibroblast	no
ENSG00000168785	TSPAN5	4	98621527	98621663	Fibroblast.47XYY-Fibroblast.46XY	137	16	71.3172	Intron (ENST00000508798/ENSG00000168785, intron 1 of 7)	Hyper	tetraspanin 5	ENSG00000168785.GeneBody	GeneBody	Fibroblast	no		2478.15	0.484339	0.175062	2.76667	0.00566328	0.0320101	not sig
ENSG00000168843	FSTL5	4	161740179	161740315	Fibroblast.47XYY-Fibroblast.46XY	137	9	45.6524	Intron (ENST00000306100/ENSG00000168843, intron 6 of 15)	Hyper	follistatin like 5	ENSG00000168843.GeneBody	GeneBody	Fibroblast	no
ENSG00000168843	FSTL5	4	161519321	161519450	Fibroblast.47XYY-Fibroblast.46XY	130	7	35.9767	Intron (ENST00000306100/ENSG00000168843, intron 10 of 15)	Hyper	follistatin like 5	ENSG00000168843.GeneBody	GeneBody	Fibroblast	no
ENSG00000168843	FSTL5	4	161758627	161758785	Fibroblast.47XYY-Fibroblast.46XY	159	8	51.1227	Intron (ENST00000306100/ENSG00000168843, intron 6 of 15)	Hyper	follistatin like 5	ENSG00000168843.GeneBody	GeneBody	Fibroblast	no
ENSG00000168918	INPP5D	2	233053956	233054090	Fibroblast.47XYY-Fibroblast.46XY	135	11	56.1701	Distal Intergenic	Hyper	inositol polyphosphate-5-phosphatase D	ENSG00000168918.Intergenic	Intergenic	Fibroblast	no
ENSG00000168918	INPP5D	2	233204530	233204593	Fibroblast.47XYY-Fibroblast.46XY	64	17	73.8168	Promoter (<=1kb)	Hyper	inositol polyphosphate-5-phosphatase D	ENSG00000168918.Promoter	Promoter	Fibroblast	no
ENSG00000168993	CPLX1	4	814503	814570	Fibroblast.47XYY-Fibroblast.46XY	68	8	38.8244	Intron (ENST00000304062/ENSG00000168993, intron 2 of 3)	Hyper	complexin 1	ENSG00000168993.GeneBody	GeneBody	Fibroblast	no
ENSG00000169016	E2F6	2	11466530	11466640	Fibroblast.47XYY-Fibroblast.46XY	111	8	38.1771	Promoter (<=1kb)	Hyper	E2F transcription factor 6	ENSG00000169016.Promoter	Promoter	Fibroblast	no		539.474	0.0188582	0.132441	0.142389	0.886773	0.945542	not sig
ENSG00000169071	ROR2	9	91741022	91741096	Fibroblast.47XYY-Fibroblast.46XY	75	5	24.749	Intron (ENST00000375715/ENSG00000169071, intron 4 of 12)	Hyper	receptor tyrosine kinase like orphan receptor 2	ENSG00000169071.GeneBody	GeneBody	Fibroblast	no		269.703	2.04346	0.929748	2.19787	0.0279586	0.108928	not sig
ENSG00000169071	ROR2	9	91860584	91862104	Fibroblast.47XYY-Fibroblast.46XY	1521	6	27.9682	Intron (ENST00000375715/ENSG00000169071, intron 1 of 12)	Hyper	receptor tyrosine kinase like orphan receptor 2	ENSG00000169071.GeneBody	GeneBody	Fibroblast	no		269.703	2.04346	0.929748	2.19787	0.0279586	0.108928	not sig
ENSG00000169084	DHRSX	X	2527660	2527745	Fibroblast.47XYY-Fibroblast.46XY	86	9	47.3783	Distal Intergenic	Hyper	dehydrogenase/reductase X-linked	ENSG00000169084.Intergenic	Intergenic	Fibroblast	PAR1	PAR	901.582	0.614474	0.187702	3.27367	0.00106162	0.00821013	up
ENSG00000169093	ASMTL	X	1434524	1434631	Fibroblast.47XYY-Fibroblast.46XY	108	4	20.7179	Promoter (<=1kb)	Hyper	acetylserotonin O-methyltransferase like	ENSG00000169093.Promoter	Promoter	Fibroblast	PAR1	PAR	1373.76	0.755094	0.140166	5.38715	7.15836e-08	1.70369e-06	up
ENSG00000169129	AFAP1L2	10	114369316	114369451	Fibroblast.47XYY-Fibroblast.46XY	136	20	166.585	Intron (ENST00000304129/ENSG00000169129, intron 1 of 18)	Hyper	actin filament associated protein 1 like 2	ENSG00000169129.GeneBody	GeneBody	Fibroblast	no		65.547	4.6648	1.10282	4.22988	2.33819e-05	0.000302499	up
ENSG00000169131	ZNF354A	5	178757671	178757808	Fibroblast.47XYY-Fibroblast.46XY	138	8	43.3549	Distal Intergenic	Hyper	zinc finger protein 354A	ENSG00000169131.Intergenic	Intergenic	Fibroblast	no		430.199	0.155682	0.201782	0.771535	0.44039	0.668787	not sig
ENSG00000169136	ATF5	19	49928238	49928373	Fibroblast.47XYY-Fibroblast.46XY	136	16	79.7892	Promoter (<=1kb)	Hyper	activating transcription factor 5	ENSG00000169136.Promoter	Promoter	Fibroblast	no		1453.51	-0.206145	0.261642	-0.787888	0.430762	0.661313	not sig
ENSG00000169155	ZBTB43	9	126777509	126777639	Fibroblast.47XYY-Fibroblast.46XY	131	7	29.3012	Distal Intergenic	Hyper	zinc finger and BTB domain containing 43	ENSG00000169155.Intergenic	Intergenic	Fibroblast	no		749.499	-0.0607416	0.148083	-0.410185	0.68167	0.83313	not sig
ENSG00000169181	GSG1L	16	28082519	28082628	Fibroblast.47XYY-Fibroblast.46XY	110	18	111.386	Distal Intergenic	Hyper	GSG1 like	ENSG00000169181.Intergenic	Intergenic	Fibroblast	no
ENSG00000169189	NSMCE1	16	27236020	27236136	Fibroblast.47XYY-Fibroblast.46XY	117	4	19.8921	Promoter (2-3kb)	Hyper	NSE1 homolog, SMC5-SMC6 complex component	ENSG00000169189.Promoter	Promoter	Fibroblast	no		1217.81	0.110104	0.118768	0.927052	0.353899	0.592934	not sig
ENSG00000169436	COL22A1	8	138755076	138755157	Fibroblast.47XYY-Fibroblast.46XY	82	6	25.1141	Exon (ENST00000303045/ENSG00000169436, exon 21 of 65)	Hyper	collagen type XXII alpha 1 chain	ENSG00000169436.GeneBody	GeneBody	Fibroblast	no		63.8099	2.63285	2.50001	1.05314	0.292278	0.531777	not sig
ENSG00000169504	CLIC4	1	24747916	24752406	Fibroblast.47XYY-Fibroblast.46XY	4491	6	29.0855	Promoter (2-3kb)	Hyper	chloride intracellular channel 4	ENSG00000169504.Promoter	Promoter	Fibroblast	no		42506.3	-0.22231	0.113222	-1.96348	0.0495899	0.166873	not sig
ENSG00000169641	LUZP1	1	23115571	23115697	Fibroblast.47XYY-Fibroblast.46XY	127	11	49.9185	Intron (ENST00000418342/ENSG00000169641, intron 1 of 3)	Hyper	leucine zipper protein 1	ENSG00000169641.GeneBody	GeneBody	Fibroblast	no		4503.54	-0.102194	0.144078	-0.709295	0.478142	0.697644	not sig
ENSG00000169641	LUZP1	1	23113602	23113708	Fibroblast.47XYY-Fibroblast.46XY	107	13	60.7572	Intron (ENST00000418342/ENSG00000169641, intron 1 of 3)	Hyper	leucine zipper protein 1	ENSG00000169641.GeneBody	GeneBody	Fibroblast	no		4503.54	-0.102194	0.144078	-0.709295	0.478142	0.697644	not sig
ENSG00000169756	LIMS1	2	108585914	108586048	Fibroblast.47XYY-Fibroblast.46XY	135	12	60.0798	Promoter (2-3kb)	Hyper	LIM zinc finger domain containing 1	ENSG00000169756.Promoter	Promoter	Fibroblast	no		4488.29	0.321021	0.176086	1.82309	0.0682893	0.20958	not sig
ENSG00000169840	GSX1	13	27801809	27801885	Fibroblast.47XYY-Fibroblast.46XY	77	8	36.0604	Distal Intergenic	Hyper	GS homeobox 1	ENSG00000169840.Intergenic	Intergenic	Fibroblast	no
ENSG00000169862	CTNND2	5	11842440	11842575	Fibroblast.47XYY-Fibroblast.46XY	136	12	67.9589	Intron (ENST00000304623/ENSG00000169862, intron 1 of 21)	Hyper	catenin delta 2	ENSG00000169862.GeneBody	GeneBody	Fibroblast	no		31.5399	5.56365	1.16854	4.76122	1.9243e-06	3.32697e-05	up
ENSG00000169862	CTNND2	5	10992621	10992734	Fibroblast.47XYY-Fibroblast.46XY	114	8	39.5034	3' UTR	Hyper	catenin delta 2	ENSG00000169862.GeneBody	GeneBody	Fibroblast	no		31.5399	5.56365	1.16854	4.76122	1.9243e-06	3.32697e-05	up
ENSG00000169896	ITGAM	16	31239843	31239896	Fibroblast.47XYY-Fibroblast.46XY	54	7	31.386	Distal Intergenic	Hyper	integrin subunit alpha M	ENSG00000169896.Intergenic	Intergenic	Fibroblast	no
ENSG00000170271	FAXDC2	5	154835740	154835876	Fibroblast.47XYY-Fibroblast.46XY	137	11	94.7518	Promoter (<=1kb)	Hyper	fatty acid hydroxylase domain containing 2	ENSG00000170271.Promoter	Promoter	Fibroblast	no		472.143	0.0982443	0.295589	0.332368	0.739612	0.867631	not sig
ENSG00000170381	SEMA3E	7	83500752	83505871	Fibroblast.47XYY-Fibroblast.46XY	5120	12	77.1591	Intron (ENST00000643230/ENSG00000170381, intron 1 of 16)	Hyper	semaphorin 3E	ENSG00000170381.GeneBody	GeneBody	Fibroblast	no
ENSG00000170417	TMEM182	2	102827827	102827947	Fibroblast.47XYY-Fibroblast.46XY	121	6	41.2864	Intron (ENST00000639249/ENSG00000170417, intron 4 of 4)	Hyper	transmembrane protein 182	ENSG00000170417.GeneBody	GeneBody	Fibroblast	no		69.0695	0.170322	0.26287	0.647933	0.517028	0.728006	not sig
ENSG00000170485	NPAS2	2	100793555	100793616	Fibroblast.47XYY-Fibroblast.46XY	62	4	18.0804	Distal Intergenic	Hyper	neuronal PAS domain protein 2	ENSG00000170485.Intergenic	Intergenic	Fibroblast	no		615.51	-1.12922	0.195438	-5.77788	7.56466e-09	2.24543e-07	down
ENSG00000170485	NPAS2	2	100892535	100892878	Fibroblast.47XYY-Fibroblast.46XY	344	24	223.075	Intron (ENST00000335681/ENSG00000170485, intron 1 of 20)	Hyper	neuronal PAS domain protein 2	ENSG00000170485.GeneBody	GeneBody	Fibroblast	no		615.51	-1.12922	0.195438	-5.77788	7.56466e-09	2.24543e-07	down
ENSG00000170516	COX7B2	4	46814988	46815045	Fibroblast.47XYY-Fibroblast.46XY	58	8	36.2269	Intron (ENST00000396533/ENSG00000170516, intron 3 of 3)	Hyper	cytochrome c oxidase subunit 7B2	ENSG00000170516.GeneBody	GeneBody	Fibroblast	no
ENSG00000170525	PFKFB3	10	6219200	6219273	Fibroblast.47XYY-Fibroblast.46XY	74	15	66.3299	Promoter (2-3kb)	Hyper	6-phosphofructo-2-kinase/fructose-2,6-biphosphatase 3	ENSG00000170525.Promoter	Promoter	Fibroblast	no		2299.16	-0.219751	0.200215	-1.09757	0.272391	0.509777	not sig
ENSG00000170537	TMC7	16	18961877	18962014	Fibroblast.47XYY-Fibroblast.46XY	138	6	35.8187	Distal Intergenic	Hyper	transmembrane channel like 7	ENSG00000170537.Intergenic	Intergenic	Fibroblast	no		68.6731	0.191862	0.252134	0.760951	0.446687	0.673287	not sig
ENSG00000170577	SIX2	2	45005168	45005319	Fibroblast.47XYY-Fibroblast.46XY	152	22	-107.857	3' UTR	Hypo	SIX homeobox 2	ENSG00000170577.GeneBody	GeneBody	Fibroblast	no
ENSG00000170743	SYT9	11	7310680	7310741	Fibroblast.47XYY-Fibroblast.46XY	62	5	23.642	Intron (ENST00000524820/ENSG00000170743, intron 2 of 8)	Hyper	synaptotagmin 9	ENSG00000170743.GeneBody	GeneBody	Fibroblast	no
ENSG00000170801	HTRA3	4	8260106	8260260	Fibroblast.47XYY-Fibroblast.46XY	155	5	29.3438	Distal Intergenic	Hyper	HtrA serine peptidase 3	ENSG00000170801.Intergenic	Intergenic	Fibroblast	no		1152	1.22139	0.186008	6.5663	5.15801e-11	2.3657e-09	up
ENSG00000170801	HTRA3	4	8267127	8267235	Fibroblast.47XYY-Fibroblast.46XY	109	12	58.4896	Promoter (2-3kb)	Hyper	HtrA serine peptidase 3	ENSG00000170801.Promoter	Promoter	Fibroblast	no		1152	1.22139	0.186008	6.5663	5.15801e-11	2.3657e-09	up
ENSG00000170852	KBTBD2	7	32907392	32907488	Fibroblast.47XYY-Fibroblast.46XY	97	5	23.666	Distal Intergenic	Hyper	kelch repeat and BTB domain containing 2	ENSG00000170852.Intergenic	Intergenic	Fibroblast	no		2330.43	0.0129712	0.175201	0.0740361	0.940982	0.971996	not sig
ENSG00000170852	KBTBD2	7	32905978	32906101	Fibroblast.47XYY-Fibroblast.46XY	124	16	-86.9169	Distal Intergenic	Hypo	kelch repeat and BTB domain containing 2	ENSG00000170852.Intergenic	Intergenic	Fibroblast	no		2330.43	0.0129712	0.175201	0.0740361	0.940982	0.971996	not sig
ENSG00000170873	MTSS1	8	124761901	124762085	Fibroblast.47XYY-Fibroblast.46XY	185	6	31.3574	Distal Intergenic	Hyper	MTSS I-BAR domain containing 1	ENSG00000170873.Intergenic	Intergenic	Fibroblast	no		86.4688	-0.391097	0.31974	-1.22317	0.221264	0.450892	not sig
ENSG00000170921	TANC2	17	63370398	63370473	Fibroblast.47XYY-Fibroblast.46XY	76	15	91.1767	Intron (ENST00000424789/ENSG00000170921, intron 12 of 24)	Hyper	tetratricopeptide repeat, ankyrin repeat and coiled-coil containing 2	ENSG00000170921.GeneBody	GeneBody	Fibroblast	no		3722.13	0.476669	0.147314	3.23573	0.00121334	0.00914785	not sig
ENSG00000170959	DCDC1	11	30897309	30897403	Fibroblast.47XYY-Fibroblast.46XY	95	6	28.8844	Intron (ENST00000444572/ENSG00000170959, intron 12 of 20)	Hyper	doublecortin domain containing 1	ENSG00000170959.GeneBody	GeneBody	Fibroblast	no
ENSG00000171044	XKR6	8	10983815	10983950	Fibroblast.47XYY-Fibroblast.46XY	136	12	54.3726	Intron (ENST00000382461/ENSG00000171044, intron 1 of 2)	Hyper	XK related 6	ENSG00000171044.GeneBody	GeneBody	Fibroblast	no
ENSG00000171105	INSR	19	7244388	7244486	Fibroblast.47XYY-Fibroblast.46XY	99	4	18.5562	Intron (ENST00000341500/ENSG00000171105, intron 2 of 20)	Hyper	insulin receptor	ENSG00000171105.GeneBody	GeneBody	Fibroblast	no		750.811	0.265671	0.176912	1.50171	0.133171	0.32674	not sig
ENSG00000171150	SOCS5	2	46717825	46717960	Fibroblast.47XYY-Fibroblast.46XY	136	4	25.0439	Intron (ENST00000650611/ENSG00000222005, intron 1 of 7)	Hyper	suppressor of cytokine signaling 5	ENSG00000171150.GeneBody	GeneBody	Fibroblast	no		4505.34	-0.253925	0.231305	-1.09779	0.272296	0.509673	not sig
ENSG00000171189	GRIK1	21	29945930	29946078	Fibroblast.47XYY-Fibroblast.46XY	149	10	47.3244	Distal Intergenic	Hyper	glutamate ionotropic receptor kainate type subunit 1	ENSG00000171189.Intergenic	Intergenic	Fibroblast	no
ENSG00000171298	GAA	17	80113281	80113350	Fibroblast.47XYY-Fibroblast.46XY	70	12	-66.4187	Promoter (<=1kb)	Hypo	alpha glucosidase	ENSG00000171298.Promoter	Promoter	Fibroblast	no		2847.54	-0.940682	0.244642	-3.84514	0.000120486	0.00128524	down
ENSG00000171302	CANT1	17	78998753	78998830	Fibroblast.47XYY-Fibroblast.46XY	78	7	28.8709	Promoter (<=1kb)	Hyper	calcium activated nucleotidase 1	ENSG00000171302.Promoter	Promoter	Fibroblast	no		3079.96	-0.139178	0.184818	-0.753056	0.451416	0.677663	not sig
ENSG00000171303	KCNK3	2	26724241	26724366	Fibroblast.47XYY-Fibroblast.46XY	126	6	52.9136	Intron (ENST00000620977/ENSG00000171303, intron 2 of 2)	Hyper	potassium two pore domain channel subfamily K member 3	ENSG00000171303.GeneBody	GeneBody	Fibroblast	no
ENSG00000171435	KSR2	12	117772816	117773027	Fibroblast.47XYY-Fibroblast.46XY	212	8	49.3883	Intron (ENST00000425217/ENSG00000171435, intron 3 of 19)	Hyper	kinase suppressor of ras 2	ENSG00000171435.GeneBody	GeneBody	Fibroblast	no
ENSG00000171456	ASXL1	20	32417904	32418102	Fibroblast.47XYY-Fibroblast.46XY	199	14	67.9331	Intron (ENST00000651418/ENSG00000171456, intron 4 of 13)	Hyper	ASXL transcriptional regulator 1	ENSG00000171456.GeneBody	GeneBody	Fibroblast	no		4804.38	0.14678	0.102281	1.43507	0.151268	0.354805	not sig
ENSG00000171587	DSCAM	21	40818413	40818470	Fibroblast.47XYY-Fibroblast.46XY	58	5	24.0954	Intron (ENST00000400454/ENSG00000171587, intron 1 of 32)	Hyper	DS cell adhesion molecule	ENSG00000171587.GeneBody	GeneBody	Fibroblast	no
ENSG00000171621	SPSB1	1	9304124	9304216	Fibroblast.47XYY-Fibroblast.46XY	93	4	19.1627	Intron (ENST00000328089/ENSG00000171621, intron 1 of 2)	Hyper	splA/ryanodine receptor domain and SOCS box containing 1	ENSG00000171621.GeneBody	GeneBody	Fibroblast	no		643.618	0.218165	0.113847	1.91631	0.055326	0.180178	not sig
ENSG00000171621	SPSB1	1	9308439	9308641	Fibroblast.47XYY-Fibroblast.46XY	203	7	-40.3115	Intron (ENST00000328089/ENSG00000171621, intron 1 of 2)	Hypo	splA/ryanodine receptor domain and SOCS box containing 1	ENSG00000171621.GeneBody	GeneBody	Fibroblast	no		643.618	0.218165	0.113847	1.91631	0.055326	0.180178	not sig
ENSG00000171643	S100Z	5	76871682	76871816	Fibroblast.47XYY-Fibroblast.46XY	135	6	38.0885	Intron (ENST00000513010/ENSG00000171643, intron 2 of 3)	Hyper	S100 calcium binding protein Z	ENSG00000171643.GeneBody	GeneBody	Fibroblast	no
ENSG00000171680	PLEKHG5	1	6491007	6491125	Fibroblast.47XYY-Fibroblast.46XY	119	7	-37.3746	Promoter (<=1kb)	Hypo	pleckstrin homology and RhoGEF domain containing G5	ENSG00000171680.Promoter	Promoter	Fibroblast	no		720.479	1.14977	0.225199	5.10557	3.29801e-07	6.80678e-06	up
ENSG00000171724	VAT1L	16	77862335	77862472	Fibroblast.47XYY-Fibroblast.46XY	138	12	57.6647	Promoter (<=1kb)	Hyper	vesicle amine transport 1 like	ENSG00000171724.Promoter	Promoter	Fibroblast	no		615.913	0.332682	1.11035	0.299618	0.764468	0.882978	not sig
ENSG00000171794	UTF1	10	133203512	133203643	Fibroblast.47XYY-Fibroblast.46XY	132	14	64.2684	Intron (ENST00000304613/ENSG00000171798, intron 17 of 29)	Hyper	undifferentiated embryonic cell transcription factor 1	ENSG00000171794.GeneBody	GeneBody	Fibroblast	no
ENSG00000171794	UTF1	10	133213271	133213374	Fibroblast.47XYY-Fibroblast.46XY	104	5	21.1446	Intron (ENST00000304613/ENSG00000171798, intron 24 of 29)	Hyper	undifferentiated embryonic cell transcription factor 1	ENSG00000171794.GeneBody	GeneBody	Fibroblast	no
ENSG00000171798	KNDC1	10	133183800	133183920	Fibroblast.47XYY-Fibroblast.46XY	121	15	62.5713	Exon (ENST00000304613/ENSG00000171798, exon 5 of 30)	Hyper	kinase non-catalytic C-lobe domain containing 1	ENSG00000171798.GeneBody	GeneBody	Fibroblast	no		45.6053	3.40049	0.438234	7.75952	8.52491e-15	6.50899e-13	up
ENSG00000171811	CFAP46	10	132941790	132941909	Fibroblast.47XYY-Fibroblast.46XY	120	5	-24.0135	Promoter (<=1kb)	Hypo	cilia and flagella associated protein 46	ENSG00000171811.Promoter	Promoter	Fibroblast	no
ENSG00000171811	CFAP46	10	132879412	132879640	Fibroblast.47XYY-Fibroblast.46XY	229	40	-193.852	Promoter (2-3kb)	Hypo	cilia and flagella associated protein 46	ENSG00000171811.Promoter	Promoter	Fibroblast	no
ENSG00000171853	TRAPPC12	2	3453231	3453373	Fibroblast.47XYY-Fibroblast.46XY	143	11	48.5846	Promoter (1-2kb)	Hyper	trafficking protein particle complex subunit 12	ENSG00000171853.Promoter	Promoter	Fibroblast	no		1698.59	-0.0960642	0.13788	-0.696723	0.485976	0.703596	not sig
ENSG00000171860	C3AR1	12	8067818	8067937	Fibroblast.47XYY-Fibroblast.46XY	120	4	17.8751	Promoter (1-2kb)	Hyper	complement C3a receptor 1	ENSG00000171860.Promoter	Promoter	Fibroblast	no
[truncated: 2,625 more rows]

## Sheet: iPSCs
Supplemental Data S7: List of DMRs identified in the contrast 47,XYY vs 46,XY in iPSCs
[truncated: 64 more rows]

## Sheet: Legend
Supplemental Data S7: List of DMRs identified in the contrast 47,XYY vs. 46,XY fibroblasts and iPSCs.
