# Supplementary material for: An iPSC-based model of 47,XYY Jacobs syndrome reveals a DNA methylation-independent transcriptional dysregulation shared with male X aneuploid cells
Source: Genome Res. 2025 Jul;35(7):1503–17. doi: 10.1101/gr.279716.124 (PMC12212075; doi:10.1101/gr.279716.124)
Supplement: Supplement 9 [file Supplemental_Data_S8_R3.xlsx]

## Sheet: Promoter
Supplemental Data S8: List of DEGs correlating with DMRs in 47,XYY vs. 46,XY Fibroblasts at promoters.
Ensembl_id	cor	chromosome_name	hgnc_symbol	start_position	end_position	description	isPAR	escape_Tukianien	variable_Tukianien	inactive_Tukianien
ENSG00000167972	-0.32	16	ABCA3	2275881	2340746	ATP binding cassette...	no	no	no	no
ENSG00000064687	-0.736	19	ABCA7	1039997	1065572	ATP binding cassette...	no	no	no	no
ENSG00000141338	0.962	17	ABCA8	68867289	68955392	ATP binding cassette...	no	no	no	no
ENSG00000124574	0.955	6	ABCC10	43427366	43450427	ATP binding cassette...	no	no	no	no
ENSG00000204574	0.977	6	ABCF1	30571393	30597179	ATP binding cassette...	no	no	no	no
ENSG00000159842	0.965	17	ABR	1003519	1229738	ABR activator of Rho...	no	no	no	no
ENSG00000111271	-0.992	12	ACAD10	111686053	111757107	acyl-CoA dehydrogena...	no	no	no	no
ENSG00000072778	-0.505	17	ACADVL	7217125	7225266	acyl-CoA dehydrogena...	no	no	no	no
ENSG00000072818	0.704	17	ACAP1	7336529	7351477	ArfGAP with coiled-c...	no	no	no	no
ENSG00000075239	-0.772	11	ACAT1	108116695	108147603	acetyl-CoA acetyltra...	no	no	no	no
ENSG00000133627	0.95	7	ACTR3B	152759749	152855378	actin related protei...	no	no	no	no
ENSG00000142303	0.312	19	ADAMTS10	8580240	8610735	ADAM metallopeptidas...	no	no	no	no
ENSG00000087116	-0.731	5	ADAMTS2	179110853	179345461	ADAM metallopeptidas...	no	no	no	no
ENSG00000136378	1	15	ADAMTS7	78759206	78811464	ADAM metallopeptidas...	no	no	no	no
ENSG00000255737	-0.803	12	AGAP2-AS1	57726271	57728356	AGAP2 antisense RNA ...	no	no	no	no
ENSG00000123908	0.683	8	AGO2	140520156	140635633	argonaute RISC catal...	no	no	no	no
ENSG00000188157	0.951	1	AGRN	1020120	1056118	agrin [Source:HGNC S...	no	no	no	no
ENSG00000197976	0.746	X	AKAP17A	1591604	1602520	A-kinase anchoring p...	PAR1	no	no	no
ENSG00000184254	-0.556	15	ALDH1A3	100877714	100916626	aldehyde dehydrogena...	no	no	no	no
ENSG00000149925	-0.68	16	ALDOA	30064164	30070457	aldolase, fructose-b...	no	no	no	no
ENSG00000125652	-0.583	19	ALKBH7	6372794	6375250	alkB homolog 7 [Sour...	no	no	no	no
ENSG00000110497	-0.303	11	AMBRA1	46396414	46594125	autophagy and beclin...	no	no	no	no
ENSG00000196704	-0.865	17	AMZ2	68205481	68257712	archaelysin family m...	no	no	no	no
ENSG00000176248	-0.969	9	ANAPC2	137174784	137188560	anaphase promoting c...	no	no	no	no
ENSG00000053900	-0.949	4	ANAPC4	25377263	25418498	anaphase promoting c...	no	no	no	no
ENSG00000101745	-0.982	18	ANKRD12	9136228	9285985	ankyrin repeat domai...	no	no	no	no
ENSG00000177721	-0.903	5	ANXA2R	43039233	43043170	annexin A2 receptor ...	no	no	no	no
ENSG00000065000	-0.302	19	AP3D1	2100988	2164468	adaptor related prot...	no	no	no	no
ENSG00000242802	-0.537	7	AP5Z1	4775615	4794397	adaptor related prot...	no	no	no	no
ENSG00000240583	0.915	7	AQP1	30911853	30925517	aquaporin 1 (Colton ...	no	no	no	no
ENSG00000120318	-0.956	5	ARAP3	141653401	141682230	ArfGAP with RhoGAP d...	no	no	no	no
ENSG00000128805	-0.737	10	ARHGAP22	48446036	48656265	Rho GTPase activatin...	no	no	no	no
ENSG00000275832	0.272	17	ARHGAP23	38419280	38512385	Rho GTPase activatin...	no	no	no	no
ENSG00000130762	0.887	1	ARHGEF16	3454665	3481113	Rho guanine nucleoti...	no	no	no	no
ENSG00000116584	0.861	1	ARHGEF2	155946851	156007070	Rho/Rac guanine nucl...	no	no	no	no
ENSG00000136002	-0.843	2	ARHGEF4	130836914	131047263	Rho guanine nucleoti...	no	no	no	no
ENSG00000162980	-0.631	2	ARL5A	151788984	151828492	ADP ribosylation fac...	no	no	no	no
ENSG00000143437	-0.912	1	ARNT	150809713	150876708	aryl hydrocarbon rec...	no	no	no	no
ENSG00000137486	-0.683	11	ARRB1	75260122	75351705	arrestin beta 1 [Sou...	no	no	no	no
ENSG00000197070	-0.808	9	ARRDC1	137605685	137615360	arrestin domain cont...	no	no	no	no
ENSG00000169093	-0.826	X	ASMTL	1403139	1453762	acetylserotonin O-me...	PAR1	no	no	no
ENSG00000169136	-0.968	19	ATF5	49928702	49933935	activating transcrip...	no	no	no	no
ENSG00000130734	0.316	19	ATG4D	10543895	10553418	autophagy related 4D...	no	no	no	no
ENSG00000111676	-0.641	12	ATN1	6924463	6942321	atrophin 1 [Source:H...	no	no	no	no
ENSG00000074370	-0.818	17	ATP2A3	3923870	3964464	ATPase sarcoplasmic/...	no	no	no	no
ENSG00000058668	0.545	1	ATP2B4	203626832	203744081	ATPase plasma membra...	no	no	no	no
ENSG00000099624	-0.905	19	ATP5F1D	1241746	1244825	ATP synthase F1 subu...	no	no	no	no
ENSG00000173915	0.981	10	ATP5MK	103389041	103396492	ATP synthase membran...	no	no	no	no
ENSG00000033627	0.927	17	ATP6V0A1	42458844	42522582	ATPase H+ transporti...	no	no	no	no
ENSG00000166377	-0.939	18	ATP9B	79069285	79378287	ATPase phospholipid ...	no	no	no	no
ENSG00000066427	-0.969	14	ATXN3	92044496	92106621	ataxin 3 [Source:HGN...	no	no	no	no
ENSG00000175711	-0.548	17	B3GNTL1	82942149	83051809	UDP-GlcNAc:betaGal b...	no	no	no	no
ENSG00000182272	-0.999	11	B4GALNT4	369499	382117	beta-1,4-N-acetyl-ga...	no	no	no	no
ENSG00000185825	-0.885	X	BCAP31	153700492	153724565	B cell receptor asso...	no	no	no	yes
ENSG00000105552	0.955	19	BCAT2	48795062	48811029	branched chain amino...	no	no	no	no
ENSG00000260518	-0.997	16	BMS1P8	33687330	33698504	BMS1 pseudogene 8 [S...	no	no	no	no
ENSG00000196544	0.899	17	BORCS6	8188345	8190180	BLOC-1 related compl...	no	no	no	no
ENSG00000137274	-0.222	6	BPHL	3118374	3153578	biphenyl hydrolase l...	no	no	no	no
ENSG00000182919	-0.986	11	C11orf54	93741591	93764749	chromosome 11 open r...	no	no	no	no
ENSG00000154102	0.499	16	C16orf74	85690084	85751129	chromosome 16 open r...	no	no	no	no
ENSG00000241852	0.449	8	C8orf58	22599599	22604150	chromosome 8 open re...	no	no	no	no
ENSG00000160325	-0.998	9	CACFD1	133459965	133470848	calcium channel flow...	no	no	no	no
ENSG00000196557	0.883	16	CACNA1H	1153106	1221771	calcium voltage-gate...	no	no	no	no
ENSG00000167535	-0.997	12	CACNB3	48813794	48828941	calcium voltage-gate...	no	no	no	no
ENSG00000171302	0.996	17	CANT1	78991716	79009867	calcium activated nu...	no	no	no	no
ENSG00000014216	-0.877	11	CAPN1	65180566	65212006	calpain 1 [Source:HG...	no	no	no	no
ENSG00000134905	0.996	13	CARS2	110641412	110713603	cysteinyl-tRNA synth...	no	no	no	no
ENSG00000108349	0.955	17	CASC3	40140318	40172171	CASC3 exon junction ...	no	no	no	no
ENSG00000141582	-0.897	17	CBX4	79833156	79839440	chromobox 4 [Source:...	no	no	no	no
ENSG00000128596	0.851	7	CCDC136	128790757	128822132	coiled-coil domain c...	no	no	no	no
ENSG00000154874	-1	17	CCDC144BP	18542155	18625447	coiled-coil domain c...	no	no	no	no
ENSG00000176155	-0.993	17	CCDC57	82101460	82212878	coiled-coil domain c...	no	no	no	no
ENSG00000105321	0.512	19	CCDC9	47255980	47273701	coiled-coil domain c...	no	no	no	no
ENSG00000104415	-0.982	8	CCN4	133191039	133231690	cellular communicati...	no	no	no	no
ENSG00000107771	0.291	10	CCSER2	84328586	84518521	coiled-coil serine r...	no	no	no	no
ENSG00000039068	0.748	16	CDH1	68737292	68835537	cadherin 1 [Source:H...	no	no	no	no
ENSG00000075275	-0.528	22	CELSR1	46360834	46537620	cadherin EGF LAG sev...	no	no	no	no
ENSG00000197766	-0.946	19	CFD	859453	867884	complement factor D ...	no	no	no	no
ENSG00000164430	-0.444	6	CGAS	73413515	73452297	cyclic GMP-AMP synth...	no	no	no	no
ENSG00000138135	-0.899	10	CH25H	89205629	89207317	cholesterol 25-hydro...	no	no	no	no
ENSG00000159259	0.998	21	CHAF1B	36385392	36419015	chromatin assembly f...	no	no	no	no
ENSG00000176108	-0.973	17	CHMP6	80991598	81009517	charged multivesicul...	no	no	no	no
ENSG00000108556	-0.785	17	CHRNE	4897771	4934438	cholinergic receptor...	no	no	no	no
ENSG00000160679	0.549	1	CHTOP	153633982	153646306	chromatin target of ...	no	no	no	no
ENSG00000103245	-0.666	16	CIAO3	729760	741329	cytosolic iron-sulfu...	no	no	no	no
ENSG00000136425	-0.641	15	CIB2	78104606	78131535	calcium and integrin...	no	no	no	no
ENSG00000160161	-0.979	19	CILP2	19538248	19546659	cartilage intermedia...	no	no	no	no
ENSG00000148337	-0.656	9	CIZ1	128161251	128204383	CDKN1A interacting z...	no	no	no	no
ENSG00000169504	0.492	1	CLIC4	24745382	24844321	chloride intracellul...	no	no	no	no
ENSG00000104853	0.855	19	CLPTM1	44954585	44993341	CLPTM1 regulator of ...	no	no	no	no
ENSG00000197467	-0.789	10	COL13A1	69801880	69964275	collagen type XIII a...	no	no	no	no
ENSG00000182871	0.999	21	COL18A1	45405165	45513720	collagen type XVIII ...	no	no	no	no
ENSG00000142156	0.955	21	COL6A1	45981770	46005050	collagen type VI alp...	no	no	no	no
ENSG00000130309	-0.509	19	COLGALT1	17555649	17583162	collagen beta(1-O)ga...	no	no	no	no
ENSG00000198612	-0.965	2	COPS8	237085882	237100474	COP9 signalosome sub...	no	no	no	no
ENSG00000172725	-0.338	11	CORO1B	67435510	67443821	coronin 1B [Source:H...	no	no	no	no
ENSG00000103647	-0.628	15	CORO2B	68578993	68727806	coronin 2B [Source:H...	no	no	no	no
ENSG00000240230	0.999	7	COX19	898778	975549	cytochrome c oxidase...	no	no	no	no
ENSG00000080819	0.878	3	CPOX	98579446	98593648	coproporphyrinogen o...	no	no	no	no
ENSG00000164932	-0.998	8	CTHRC1	103371538	103382989	collagen triple heli...	no	no	no	no
ENSG00000262903	-0.995	17	CTNS-AS1	3655621	3658092	CTNS antisense RNA 1...	no	no	no	no
ENSG00000136848	-0.689	9	DAB2IP	121567057	121785530	DAB2 interacting pro...	no	no	no	no
ENSG00000172992	-0.664	17	DCAKD	45023338	45061131	dephospho-CoA kinase...	no	no	no	no
ENSG00000167986	-0.846	11	DDB1	61299451	61342596	damage specific DNA ...	no	no	no	no
ENSG00000089737	0.603	14	DDX24	94048287	94081202	DEAD-box helicase 24...	no	no	no	no
ENSG00000123136	0.831	19	DDX39A	14408798	14419383	DExD-box helicase 39...	no	no	no	no
ENSG00000119522	0.879	9	DENND1A	123379654	123930152	DENN domain containi...	no	no	no	no
ENSG00000105339	-0.557	8	DENND3	141117278	141195808	DENN domain containi...	no	no	no	no
ENSG00000065357	0.894	12	DGKA	55927319	55954027	diacylglycerol kinas...	no	no	no	no
ENSG00000215256	-0.724	14	DHRS4-AS1	23938219	24052555	DHRS4 antisense RNA ...	no	no	no	no
ENSG00000166938	0.779	15	DIS3L	66293217	66333898	DIS3 like exosome 3'...	no	no	no	no
ENSG00000082458	0.862	X	DLG3	70444835	70505490	discs large MAGUK sc...	no	no	no	yes
ENSG00000080845	0.723	20	DLGAP4	36306336	36528637	DLG associated prote...	no	no	no	no
ENSG00000185559	0.608	14	DLK1	100725705	100738224	delta like non-canon...	no	no	no	no
ENSG00000144355	0.993	2	DLX1	172084740	172089677	distal-less homeobox...	no	no	no	no
ENSG00000114841	-0.761	3	DNAH1	52316319	52400492	dynein axonemal heav...	no	no	no	no
ENSG00000132002	1	19	DNAJB1	14514769	14560391	DnaJ heat shock prot...	no	no	no	no
ENSG00000007923	0.987	1	DNAJC11	6634168	6701924	DnaJ heat shock prot...	no	no	no	no
ENSG00000213918	0.997	16	DNASE1	3611728	3680143	deoxyribonuclease 1 ...	no	no	no	no
ENSG00000088305	0.993	20	DNMT3B	32762385	32809359	DNA methyltransferas...	no	no	no	no
ENSG00000125170	-1	16	DOK4	57471922	57487327	docking protein 4 [S...	no	no	no	no
ENSG00000142002	-0.548	19	DPP9	4674341	4724673	dipeptidyl peptidase...	no	no	no	no
ENSG00000151640	0.716	10	DPYSL4	132186948	132205759	dihydropyrimidinase ...	no	no	no	no
ENSG00000111817	-0.719	6	DSE	116254173	116444861	dermatan sulfate epi...	no	no	no	no
ENSG00000149636	0.567	20	DSN1	36751791	36773818	DSN1 component of MI...	no	no	no	no
ENSG00000125821	-0.975	20	DTD1	18587942	18766644	D-aminoacyl-tRNA dea...	no	no	no	no
ENSG00000120875	0.629	8	DUSP4	29333064	29350684	dual specificity pho...	no	no	no	no
ENSG00000204348	-0.359	6	DXO	31969810	31972290	decapping exoribonuc...	no	no	no	no
ENSG00000119333	-0.483	9	DYNC2I2	128633653	128656847	dynein 2 intermediat...	no	no	no	no
ENSG00000205250	-0.642	16	E2F4	67192155	67198918	E2F transcription fa...	no	no	no	no
ENSG00000169016	0.331	2	E2F6	11444375	11466177	E2F transcription fa...	no	no	no	no
ENSG00000221818	0.975	8	EBF2	25841725	26045413	EBF transcription fa...	no	no	no	no
ENSG00000103319	-0.791	16	EEF2K	22206278	22288738	eukaryotic elongatio...	no	no	no	no
ENSG00000108947	0.948	17	EFNB3	7705202	7711372	ephrin B3 [Source:HG...	no	no	no	no
ENSG00000269858	-0.992	19	EGLN2	40798996	40808434	egl-9 family hypoxia...	no	no	no	no
ENSG00000110047	0.822	11	EHD1	64851642	64888296	EH domain containing...	no	no	no	no
ENSG00000106263	-0.937	7	EIF3B	2354086	2380745	eukaryotic translati...	no	no	no	no
ENSG00000114867	-0.64	3	EIF4G1	184314495	184335358	eukaryotic translati...	no	no	no	no
ENSG00000049540	0.71	7	ELN	74027789	74069907	elastin [Source:HGNC...	no	no	no	no
ENSG00000163064	-0.999	2	EN1	118842171	118847648	engrailed homeobox 1...	no	no	no	no
ENSG00000167280	-0.206	17	ENGASE	79074824	79088599	endo-beta-N-acetylgl...	no	no	no	no
ENSG00000138792	0.991	4	ENPEP	110365733	110565285	glutamyl aminopeptid...	no	no	no	no
ENSG00000082397	-0.993	18	EPB41L3	5392381	5630700	erythrocyte membrane...	no	no	no	no
ENSG00000095203	-1	9	EPB41L4B	109171974	109321059	erythrocyte membrane...	no	no	no	no
ENSG00000146904	0.988	7	EPHA1	143390289	143408856	EPH receptor A1 [Sou...	no	no	no	no
ENSG00000177106	0.691	11	EPS8L2	694438	727727	EPS8 like 2 [Source:...	no	no	no	no
ENSG00000113719	0.713	5	ERGIC1	172834251	172952792	endoplasmic reticulu...	no	no	no	no
ENSG00000144488	-0.608	2	ESPNL	238100340	238133287	espin like [Source:H...	no	no	no	no
ENSG00000100056	0.643	22	ESS2	19130279	19144684	ess-2 splicing facto...	no	no	no	no
ENSG00000120705	-0.267	5	ETF1	138506095	138543236	eukaryotic translati...	no	no	no	no
ENSG00000205707	-0.215	12	ETFRF1	25195216	25209645	electron transfer fl...	no	no	no	no
ENSG00000175832	-0.982	17	ETV4	43527844	43579620	ETS variant transcri...	no	no	no	no
ENSG00000067208	0.996	1	EVI5	92508696	92792404	ecotropic viral inte...	no	no	no	no
ENSG00000142459	1	19	EVI5L	7830218	7864976	ecotropic viral inte...	no	no	no	no
ENSG00000180104	0.487	5	EXOC3	443175	471937	exocyst complex comp...	no	no	no	no
ENSG00000064655	-0.782	20	EYA2	46894624	47188844	EYA transcriptional ...	no	no	no	no
ENSG00000101447	0.555	20	FAM83D	38926312	38953106	family with sequence...	no	no	no	no
ENSG00000180921	-0.276	8	FAM83H	143723933	143738234	family with sequence...	no	no	no	no
ENSG00000152767	0.997	13	FARP1	98142562	98455176	FERM, ARH/RhoGEF and...	no	no	no	no
ENSG00000170271	-0.921	5	FAXDC2	154818492	154859252	fatty acid hydroxyla...	no	no	no	no
ENSG00000140092	-0.542	14	FBLN5	91869411	91947987	fibulin 5 [Source:HG...	no	no	no	no
ENSG00000151876	0.971	5	FBXO4	41925254	41941743	F-box protein 4 [Sou...	no	no	no	no
ENSG00000177051	-0.995	19	FBXO46	45710629	45730896	F-box protein 46 [So...	no	no	no	no
ENSG00000079459	0.468	8	FDFT1	11795573	11839304	farnesyl-diphosphate...	no	no	no	no
ENSG00000268388	0.977	16	FENDRR	86474529	86509099	FOXF1 adjacent non-c...	no	no	no	no
ENSG00000066468	-0.648	10	FGFR2	121478332	121598458	fibroblast growth fa...	no	no	no	no
ENSG00000172456	-0.926	1	FGGY	59296638	59810647	FGGY carbohydrate ki...	no	no	no	no
ENSG00000214253	-0.991	7	FIS1	101239458	101252316	fission, mitochondri...	no	no	no	no
ENSG00000244161	-0.529	3	FLNB-AS1	58162547	58170636	FLNB antisense RNA 1...	no	no	no	no
ENSG00000132589	0.686	17	FLOT2	28879335	28897733	flotillin 2 [Source:...	no	no	no	no
ENSG00000115414	0.83	2	FN1	215360440	215436073	fibronectin 1 [Sourc...	no	no	no	no
ENSG00000228594	0.564	1	FNDC10	1598012	1600135	fibronectin type III...	no	no	no	no
ENSG00000160097	0.799	1	FNDC5	32862268	32872482	fibronectin type III...	no	no	no	no
ENSG00000206262	0.969	3	FOXL2NB	138947217	138953990	FOXL2 neighbor [Sour...	no	no	no	no
ENSG00000150907	-0.854	13	FOXO1	40555667	40666641	forkhead box O1 [Sou...	no	no	no	no
ENSG00000179772	-0.944	20	FOXS1	31844303	31845604	forkhead box S1 [Sou...	no	no	no	no
ENSG00000134363	0.999	5	FST	53480626	53487134	follistatin [Source:...	no	no	no	no
ENSG00000179163	0.999	1	FUCA1	23845077	23868290	alpha-L-fucosidase 1...	no	no	no	no
ENSG00000174804	-0.998	11	FZD4	86945679	86955395	frizzled class recep...	no	no	no	no
ENSG00000163251	-0.586	2	FZD5	207762598	207769906	frizzled class recep...	no	no	no	no
ENSG00000171298	0.999	17	GAA	80101556	80119881	alpha glucosidase [S...	no	no	no	no
ENSG00000128683	0.342	2	GAD1	170813213	170861151	glutamate decarboxyl...	no	no	no	no
ENSG00000069482	0.951	11	GAL	68683779	68691175	galanin and GMAP pre...	no	no	no	no
ENSG00000157833	0.81	2	GAREM2	26173088	26189663	GRB2 associated regu...	no	no	no	no
ENSG00000233695	0.642	13	GAS6-AS1	113815630	113845744	GAS6 antisense RNA 1...	no	no	no	no
ENSG00000141013	-0.927	16	GAS8	90019629	90044975	growth arrest specif...	no	no	no	no
ENSG00000168621	-0.328	5	GDNF	37812677	37840041	glial cell derived n...	no	no	no	no
ENSG00000250571	-0.98	8	GLI4	143267433	143276931	GLI family zinc fing...	no	no	no	no
ENSG00000016864	-0.862	3	GLT8D1	52694486	52706032	glycosyltransferase ...	no	no	no	no
ENSG00000112699	-1	6	GMDS	1623806	2245605	GDP-mannose 4,6-dehy...	no	no	no	no
ENSG00000250903	0.639	6	GMDS-DT	2245718	2525976	GMDS divergent trans...	no	no	no	no
ENSG00000144591	0.347	2	GMPPA	219498865	219513898	GDP-mannose pyrophos...	no	no	no	no
ENSG00000125166	-0.516	16	GOT2	58707131	58734342	glutamic-oxaloacetic...	no	no	no	no
ENSG00000119714	0.847	14	GPR68	91232532	91253925	G protein-coupled re...	no	no	no	no
ENSG00000167468	-0.893	19	GPX4	1103982	1106791	glutathione peroxida...	no	no	no	no
ENSG00000104518	-0.995	8	GSDMD	143553207	143563062	gasdermin D [Source:...	no	no	no	no
ENSG00000131149	0.909	16	GSE1	85169525	85676204	Gse1 coiled-coil pro...	no	no	no	no
ENSG00000234072	0.439	2	GTF3C2-AS2	27356246	27367622	GTF3C2 antisense RNA...	no	no	no	no
ENSG00000143774	-0.905	1	GUK1	228139962	228148984	guanylate kinase 1 [...	no	no	no	no
ENSG00000183666	-0.741	5	GUSBP1	21459560	21501826	GUSB pseudogene 1 [S...	no	no	no	no
ENSG00000224189	-0.805	2	HAGLR	176164051	176188958	HOXD antisense growt...	no	no	no	no
ENSG00000237125	-0.989	4	HAND2-AS1	173527270	173659696	HAND2 antisense RNA ...	no	no	no	no
ENSG00000213397	-0.43	X	HAUS7	153447668	153495516	HAUS augmin like com...	no	no	no	yes
ENSG00000068024	0.929	2	HDAC4	239048168	239401654	histone deacetylase ...	no	no	no	no
ENSG00000124440	-0.876	19	HIF3A	46297042	46343433	hypoxia inducible fa...	no	no	no	no
ENSG00000136630	0.243	1	HLX	220879431	220885059	H2.0 like homeobox [...	no	no	no	no
ENSG00000101294	-0.761	20	HM13	31514410	31577923	histocompatibility m...	no	no	no	no
ENSG00000095066	-0.992	19	HOOK2	12763003	12872740	hook microtubule tet...	no	no	no	no
ENSG00000122592	0.982	7	HOXA7	27153716	27157936	homeobox A7 [Source:...	no	no	no	no
ENSG00000108511	0.897	17	HOXB6	48595751	48604992	homeobox B6 [Source:...	no	no	no	no
ENSG00000260027	-0.871	17	HOXB7	48607232	48633572	homeobox B7 [Source:...	no	no	no	no
ENSG00000128652	-0.26	2	HOXD3	176136612	176173102	homeobox D3 [Source:...	no	no	no	no
ENSG00000102878	0.98	16	HSF4	67164681	67169945	heat shock transcrip...	no	no	no	no
ENSG00000170801	0.997	4	HTRA3	8269754	8307098	HtrA serine peptidas...	no	no	no	no
ENSG00000010295	-0.807	12	IFFO1	6538961	6556073	intermediate filamen...	no	no	no	no
ENSG00000119922	0.883	10	IFIT2	89283694	89309271	interferon induced p...	no	no	no	no
ENSG00000159128	-0.993	21	IFNGR2	33403413	33479348	interferon gamma rec...	no	no	no	no
ENSG00000163913	-0.897	3	IFT122	129429607	129520510	intraflagellar trans...	no	no	no	no
ENSG00000159217	0.984	17	IGF2BP1	48997385	49056145	insulin like growth ...	no	no	no	no
ENSG00000136231	0.966	7	IGF2BP3	23310209	23470491	insulin like growth ...	no	no	no	no
ENSG00000203485	-0.998	14	INF2	104681146	104722535	inverted formin 2 [S...	no	no	no	no
ENSG00000241644	-0.453	7	INMT	30697985	30757602	indolethylamine N-me...	no	no	no	no
ENSG00000128908	0.995	15	INO80	40978880	41116280	INO80 complex ATPase...	no	no	no	no
ENSG00000104299	-0.998	8	INTS9	28767661	28890242	integrator complex s...	no	no	no	no
ENSG00000143319	0.917	1	ISG20L2	156721891	156728766	interferon stimulate...	no	no	no	no
ENSG00000100605	-0.68	14	ITPK1	92936914	93116320	inositol-tetrakispho...	no	no	no	no
ENSG00000198399	0.754	2	ITSN2	24202864	24360536	intersectin 2 [Sourc...	no	no	no	no
ENSG00000188385	-0.722	10	JAKMIP3	132036336	132184858	Janus kinase and mic...	no	no	no	no
ENSG00000100221	-0.832	22	JOSD1	38685543	38701556	Josephin domain cont...	no	no	no	no
ENSG00000234616	0.946	8	JRK	142657460	142681968	Jrk helix-turn-helix...	no	no	no	no
ENSG00000172977	0.874	11	KAT5	65711996	65719604	lysine acetyltransfe...	no	no	no	no
ENSG00000103510	-0.447	16	KAT8	31114489	31131393	lysine acetyltransfe...	no	no	no	no
ENSG00000069424	-0.556	1	KCNAB2	5990927	6101193	potassium voltage-ga...	no	no	no	no
ENSG00000175538	-0.228	11	KCNE3	74454841	74467729	potassium voltage-ga...	no	no	no	no
ENSG00000152049	0.986	2	KCNE4	223052190	223198399	potassium voltage-ga...	no	no	no	no
ENSG00000135709	0.368	16	KIAA0513	85027782	85094230	KIAA0513 [Source:HGN...	no	no	no	no
ENSG00000162522	-0.952	1	KIAA1522	32741830	32774970	KIAA1522 [Source:HGN...	no	no	no	no
ENSG00000135835	-0.989	1	KIAA1614	180912897	180951614	KIAA1614 [Source:HGN...	no	no	no	no
ENSG00000138160	0.794	10	KIF11	92574105	92655395	kinesin family membe...	no	no	no	no
ENSG00000117245	0.997	1	KIF17	20664014	20718017	kinesin family membe...	no	no	no	no
ENSG00000126214	-0.834	14	KLC1	103561896	103714249	kinesin light chain ...	no	no	no	no
ENSG00000172059	0.452	2	KLF11	10042849	10054836	KLF transcription fa...	no	no	no	no
ENSG00000110066	0.844	11	KMT5B	68154863	68213852	lysine methyltransfe...	no	no	no	no
ENSG00000133247	-0.988	19	KMT5C	55339853	55348121	lysine methyltransfe...	no	no	no	no
ENSG00000105700	-0.706	19	KXD1	18557762	18569387	KxDL motif containin...	no	no	no	no
ENSG00000240563	-0.372	1	L1TD1	62194849	62212328	LINE1 type transposa...	no	no	no	no
ENSG00000130702	0.906	20	LAMA5	62307955	62367312	laminin subunit alph...	no	no	no	no
ENSG00000133706	0.814	5	LARS1	146110566	146182696	leucyl-tRNA syntheta...	no	no	no	no
ENSG00000131023	-1	6	LATS1	149658153	149718105	large tumor suppress...	no	no	no	no
ENSG00000204381	0.975	11	LAYN	111540280	111561745	layilin [Source:HGNC...	no	no	no	no
ENSG00000168675	0.395	18	LDLRAD4	13217498	13652755	low density lipoprot...	no	no	no	no
ENSG00000167615	-0.592	19	LENG8	54448887	54462016	leukocyte receptor c...	no	no	no	no
ENSG00000116977	1	1	LGALS8	236518000	236552981	galectin 8 [Source:H...	no	no	no	no
ENSG00000162624	-0.949	1	LHX8	75128434	75161533	LIM homeobox 8 [Sour...	no	no	no	no
ENSG00000174405	0.526	13	LIG4	108207439	108218368	DNA ligase 4 [Source...	no	no	no	no
ENSG00000169756	0.755	2	LIMS1	108533671	108687246	LIM zinc finger doma...	no	no	no	no
ENSG00000072163	0.95	2	LIMS2	127638381	127681786	LIM zinc finger doma...	no	no	no	no
ENSG00000236871	-0.885	X	LINC00106	1396427	1399402	long intergenic non-...	PAR1	no	no	no
ENSG00000233237	-0.589	6	LINC00472	71343427	71420745	long intergenic non-...	no	no	no	no
ENSG00000244578	0.997	3	LINC01391	138935189	138944020	long intergenic non-...	no	no	no	no
ENSG00000237491	-0.751	1	LINC01409	778747	810065	long intergenic non-...	no	no	no	no
ENSG00000223485	-0.957	6	LINC01615	169157162	169163007	long intergenic non-...	no	no	no	no
ENSG00000237989	-0.687	21	LINC01679	43358147	43362349	long intergenic non-...	no	no	no	no
ENSG00000166035	-0.75	15	LIPC	58410569	58569844	lipase C, hepatic ty...	no	no	no	no
ENSG00000196365	0.266	19	LONP1	5691834	5720572	lon peptidase 1, mit...	no	no	no	no
ENSG00000129038	-1	15	LOXL1	73925989	73952137	lysyl oxidase like 1...	no	no	no	no
ENSG00000134013	-0.753	8	LOXL2	23296897	23425328	lysyl oxidase like 2...	no	no	no	no
ENSG00000198589	0.685	4	LRBA	150264435	151015727	LPS responsive beige...	no	no	no	no
ENSG00000162337	0.854	11	LRP5	68312591	68449275	LDL receptor related...	no	no	no	no
ENSG00000130592	0.692	11	LSP1	1850904	1892267	lymphocyte specific ...	no	no	no	no
ENSG00000049323	0.999	2	LTBP1	32946953	33399509	latent transforming ...	no	no	no	no
ENSG00000119681	-0.306	14	LTBP2	74498183	74612378	latent transforming ...	no	no	no	no
ENSG00000111321	-0.318	12	LTBR	6375045	6391571	lymphotoxin beta rec...	no	no	no	no
ENSG00000204103	1	20	MAFB	40685848	40689236	MAF bZIP transcripti...	no	no	no	no
ENSG00000245146	-0.987	5	MALINC1	140071312	140109274	mitosis associated l...	no	no	no	no
ENSG00000102882	-0.646	16	MAPK3	30114105	30123506	mitogen-activated pr...	no	no	no	no
ENSG00000069956	0.955	15	MAPK6	51952106	52067375	mitogen-activated pr...	no	no	no	no
ENSG00000165406	-0.877	10	MARCHF8	45454585	45594906	membrane associated ...	no	no	no	no
ENSG00000072518	-0.796	11	MARK2	63838928	63911020	microtubule affinity...	no	no	no	no
ENSG00000073111	-0.376	3	MCM2	127598410	127622436	minichromosome maint...	no	no	no	no
ENSG00000175221	0.437	19	MED16	867630	893218	mediator complex sub...	no	no	no	no
ENSG00000102802	-0.955	13	MEDAG	30906271	30925572	mesenteric estrogen ...	no	no	no	no
ENSG00000214548	0.899	14	MEG3	100779410	100861031	maternally expressed...	no	no	no	no
ENSG00000162591	0.515	1	MEGF6	3487951	3611508	multiple EGF like do...	no	no	no	no
ENSG00000143995	-0.934	2	MEIS1	66433452	66573869	Meis homeobox 1 [Sou...	no	no	no	no
ENSG00000165304	-0.817	9	MELK	36572862	36677683	maternal embryonic l...	no	no	no	no
ENSG00000176845	-0.835	17	METRNL	83079609	83095122	meteorin like, glial...	no	no	no	no
ENSG00000168389	-0.512	1	MFSD2A	39955112	39969968	major facilitator su...	no	no	no	no
ENSG00000131446	-0.512	5	MGAT1	180784780	180815652	alpha-1,3-mannosyl-g...	no	no	no	no
ENSG00000074416	-0.787	3	MGLL	127689062	128052190	monoglyceride lipase...	no	no	no	no
ENSG00000243156	-0.724	22	MICAL3	17787649	18024561	microtubule associat...	no	no	no	no
ENSG00000105556	0.867	19	MIER2	305573	344815	MIER family member 2...	no	no	no	no
ENSG00000148343	-0.997	9	MIGA2	129036621	129072082	mitoguardin 2 [Sourc...	no	no	no	no
ENSG00000197182	-0.719	22	MIRLET7BHG	46053869	46113928	MIRLET7B host gene [...	no	no	no	no
ENSG00000198598	0.984	12	MMP17	131828393	131851783	matrix metallopeptid...	no	no	no	no
ENSG00000261971	-0.367	16	MMP25-AS1	3037400	3059370	MMP25 antisense RNA ...	no	no	no	no
ENSG00000070444	-0.941	17	MNT	2384073	2401104	MAX network transcri...	no	no	no	no
ENSG00000172081	-0.392	19	MOB3A	2071036	2096673	MOB kinase activator...	no	no	no	no
ENSG00000061987	-0.802	12	MON2	62466817	62600476	MON2 homolog, regula...	no	no	no	no
ENSG00000159256	0.994	21	MORC3	36320189	36386148	MORC family CW-type ...	no	no	no	no
ENSG00000133030	0.943	17	MPRIP	17042457	17217679	myosin phosphatase R...	no	no	no	no
ENSG00000130312	-0.276	19	MRPL34	17292609	17306843	mitochondrial riboso...	no	no	no	no
ENSG00000178860	0.323	8	MSC	71841560	71844412	musculin [Source:HGN...	no	no	no	no
ENSG00000153944	0.819	17	MSI2	57255851	57684689	musashi RNA binding ...	no	no	no	no
ENSG00000173531	-0.913	3	MST1	49683947	49689501	macrophage stimulati...	no	no	no	no
ENSG00000163132	-0.727	4	MSX1	4859665	4863936	msh homeobox 1 [Sour...	no	no	no	no
ENSG00000137409	-0.708	6	MTCH1	36965807	36986298	mitochondrial carrie...	no	no	no	no
ENSG00000213347	-0.947	5	MXD3	177301461	177312757	MAX dimerization pro...	no	no	no	no
ENSG00000101335	0.315	20	MYL9	36541497	36551447	myosin light chain 9...	no	no	no	no
ENSG00000164591	-1	5	MYOZ3	150660882	150679368	myozenin 3 [Source:H...	no	no	no	no
ENSG00000172890	0.372	11	NADSYN1	71453109	71524107	NAD synthetase 1 [So...	no	no	no	no
ENSG00000103174	0.328	16	NAGPA	5024844	5034141	N-acetylglucosamine-...	no	no	no	no
ENSG00000141562	-0.857	17	NARF	82458180	82490537	nuclear prelamin A r...	no	no	no	no
ENSG00000134369	-0.372	1	NAV1	201539127	201826969	neuron navigator 1 [...	no	no	no	no
ENSG00000204272	0.798	X	NBDY	56729241	56819179	negative regulator o...	no	no	no	yes
ENSG00000158747	-0.65	1	NBL1	19596979	19658456	NBL1, DAN family BMP...	no	no	no	no
ENSG00000125912	0.436	19	NCLN	3185563	3209575	nicalin [Source:HGNC...	no	no	no	no
ENSG00000099795	0.308	19	NDUFB7	14566078	14572066	NADH:ubiquinone oxid...	no	no	no	no
ENSG00000160602	-0.771	17	NEK8	28725897	28743455	NIMA related kinase ...	no	no	no	no
ENSG00000119638	-0.805	14	NEK9	75079353	75127344	NIMA related kinase ...	no	no	no	no
ENSG00000131196	0.691	18	NFATC1	79395856	79529325	nuclear factor of ac...	no	no	no	no
ENSG00000162599	-0.621	1	NFIA	60865259	61462788	nuclear factor I A [...	no	no	no	no
ENSG00000141905	-0.987	19	NFIC	3314403	3469217	nuclear factor I C [...	no	no	no	no
ENSG00000008441	-0.809	19	NFIX	12995475	13098796	nuclear factor I X [...	no	no	no	no
ENSG00000131669	-0.991	9	NINJ1	93121496	93134251	ninjurin 1 [Source:H...	no	no	no	no
ENSG00000177406	-0.741	12	NINJ2-AS1	630858	664196	NINJ2 antisense RNA ...	no	no	no	no
ENSG00000182446	0.94	17	NPLOC4	81556887	81648465	NPL4 homolog, ubiqui...	no	no	no	no
ENSG00000221890	-0.973	22	NPTXR	38818452	38844028	neuronal pentraxin r...	no	no	no	no
ENSG00000126368	0.819	17	NR1D1	40092793	40100589	nuclear receptor sub...	no	no	no	no
ENSG00000175745	-0.903	5	NR2F1	93583222	93594611	nuclear receptor sub...	no	no	no	no
ENSG00000237187	-0.738	5	NR2F1-AS1	93360779	93585649	NR2F1 antisense RNA ...	no	no	no	no
ENSG00000247809	0.243	15	NR2F2-AS1	96110040	96327361	NR2F2 antisense RNA ...	no	no	no	no
ENSG00000123358	0.991	12	NR4A1	52022832	52059507	nuclear receptor sub...	no	no	no	no
ENSG00000119508	0.841	9	NR4A3	99821855	99866891	nuclear receptor sub...	no	no	no	no
ENSG00000110076	-0.699	11	NRXN2	64606174	64723197	neurexin 2 [Source:H...	no	no	no	no
ENSG00000165671	0.475	5	NSD1	177131830	177300213	nuclear receptor bin...	no	no	no	no
ENSG00000169189	-0.823	16	NSMCE1	27224994	27268772	NSE1 homolog, SMC5-S...	no	no	no	no
ENSG00000157045	-0.722	16	NTAN1	15037854	15056079	N-terminal asparagin...	no	no	no	no
ENSG00000196358	0.812	9	NTNG2	132162058	132244526	netrin G2 [Source:HG...	no	no	no	no
ENSG00000095906	-0.681	16	NUBP2	1782932	1789186	NUBP iron-sulfur clu...	no	no	no	no
ENSG00000176046	0.521	16	NUPR1	28532708	28539008	nuclear protein 1, t...	no	no	no	no
ENSG00000130045	-0.663	9	NXNL2	88534033	88584274	nucleoredoxin like 2...	no	no	no	no
ENSG00000205978	0.392	14	NYNRIN	24399003	24419283	NYN domain and retro...	no	no	no	no
ENSG00000065154	-0.952	10	OAT	124397303	124418976	ornithine aminotrans...	no	no	no	no
ENSG00000154358	0.269	1	OBSCN	228208044	228378876	obscurin, cytoskelet...	no	no	no	no
ENSG00000114026	-0.696	3	OGG1	9749944	9788219	8-oxoguanine DNA gly...	no	no	no	no
ENSG00000130558	0.998	9	OLFM1	135075422	135121180	olfactomedin 1 [Sour...	no	no	no	no
ENSG00000162745	0.983	1	OLFML2B	161983192	162023869	olfactomedin like 2B...	no	no	no	no
ENSG00000141447	-0.253	18	OSBPL1A	24162045	24397880	oxysterol binding pr...	no	no	no	no
ENSG00000130703	0.587	20	OSBPL2	62231922	62296213	oxysterol binding pr...	no	no	no	no
ENSG00000117859	-0.38	1	OSBPL9	51577179	51798427	oxysterol binding pr...	no	no	no	no
ENSG00000130669	-0.987	19	PAK4	39125770	39182816	p21 (RAC1) activated...	no	no	no	no
ENSG00000099864	0.613	19	PALM	708935	748329	paralemmin [Source:H...	no	no	no	no
ENSG00000157881	0.938	1	PANK4	2508537	2526597	pantothenate kinase ...	no	no	no	no
ENSG00000239883	0.89	10	PARGP1	45888165	45972154	poly(ADP-ribose) gly...	no	no	no	no
ENSG00000198807	-0.499	14	PAX9	36657568	36679362	paired box 9 [Source...	no	no	no	no
ENSG00000120265	-0.818	6	PCMT1	149749444	149811420	protein-L-isoasparta...	no	no	no	no
ENSG00000188002	-0.631	5	PDCD6P1	1598920	1633984	PDCD6 pseudogene 1 [...	no	no	no	no
ENSG00000113448	0.999	5	PDE4D	58969038	60522120	phosphodiesterase 4D...	no	no	no	no
ENSG00000120913	0.999	8	PDLIM2	22578279	22598025	PDZ and LIM domain 2...	no	no	no	no
ENSG00000140992	0.671	16	PDPK1	2537979	2603188	3-phosphoinositide d...	no	no	no	no
ENSG00000160209	0.93	21	PDXK	43719094	43762307	pyridoxal kinase [So...	no	no	no	no
ENSG00000124299	1	19	PEPD	33386950	33521823	peptidase D [Source:...	no	no	no	no
ENSG00000179094	0.683	17	PER1	8140472	8156506	period circadian reg...	no	no	no	no
ENSG00000170525	-0.698	10	PFKFB3	6144934	6254644	6-phosphofructo-2-ki...	no	no	no	no
ENSG00000114268	-0.826	3	PFKFB4	48517684	48562015	6-phosphofructo-2-ki...	no	no	no	no
ENSG00000087495	0.737	20	PHACTR3	59577509	59847711	phosphatase and acti...	no	no	no	no
ENSG00000112511	0.789	6	PHF1	33410399	33416453	PHD finger protein 1...	no	no	no	no
ENSG00000119403	0.954	9	PHF19	120855651	120894896	PHD finger protein 1...	no	no	no	no
ENSG00000175309	-0.501	5	PHYKPL	178208471	178232802	5-phosphohydroxy-L-l...	no	no	no	no
ENSG00000164530	-0.751	6	PI16	36948263	36964837	peptidase inhibitor ...	no	no	no	no
ENSG00000241973	-0.917	22	PI4KA	20707691	20859417	phosphatidylinositol...	no	no	no	no
ENSG00000103335	-0.822	16	PIEZO1	88715338	88785220	piezo type mechanose...	no	no	no	no
ENSG00000241878	-0.897	22	PISD	31618491	31662221	phosphatidylserine d...	no	no	no	no
ENSG00000164093	-0.929	4	PITX2	110617423	110642123	paired like homeodom...	no	no	no	no
ENSG00000160447	0.904	9	PKN3	128702503	128720916	protein kinase N3 [S...	no	no	no	no
ENSG00000160199	0.98	21	PKNOX1	42974510	43033931	PBX/knotted 1 homeob...	no	no	no	no
ENSG00000184381	-0.968	22	PLA2G6	38111495	38214778	phospholipase A2 gro...	no	no	no	no
ENSG00000149527	0.897	1	PLCH2	2425980	2505532	phospholipase C eta ...	no	no	no	no
ENSG00000143850	0.912	1	PLEKHA6	204218853	204377665	pleckstrin homology ...	no	no	no	no
ENSG00000166689	-0.996	11	PLEKHA7	16777297	17014415	pleckstrin homology ...	no	no	no	no
ENSG00000171680	-0.993	1	PLEKHG5	6467122	6520074	pleckstrin homology ...	no	no	no	no
ENSG00000105355	-0.886	19	PLIN3	4838341	4867694	perilipin 3 [Source:...	no	no	no	no
ENSG00000152952	-0.857	3	PLOD2	146035139	146163725	procollagen-lysine,2...	no	no	no	no
ENSG00000140464	-0.367	15	PML	73994673	74047827	PML nuclear body sca...	no	no	no	no
ENSG00000177666	-0.943	11	PNPLA2	818914	825573	patatin like phospho...	no	no	no	no
ENSG00000100142	0.918	22	POLR2F	37952607	38041915	RNA polymerase II, I...	no	no	no	no
ENSG00000104356	-0.983	8	POP1	98117293	98159835	POP1 homolog, ribonu...	no	no	no	no
ENSG00000110841	-0.971	12	PPFIBP1	27523431	27695564	PPFIA binding protei...	no	no	no	no
ENSG00000240344	-0.846	2	PPIL3	200870907	200889303	peptidylprolyl isome...	no	no	no	no
ENSG00000163644	0.675	4	PPM1K	88257620	88284769	protein phosphatase,...	no	no	no	no
ENSG00000172531	0.995	11	PPP1CA	67398181	67421183	protein phosphatase ...	no	no	no	no
ENSG00000213639	-0.56	2	PPP1CB	28751640	28802940	protein phosphatase ...	no	no	no	no
ENSG00000146112	1	6	PPP1R18	30676389	30687895	protein phosphatase ...	no	no	no	no
ENSG00000167393	0.726	X	PPP2R3B	333933	386955	protein phosphatase ...	PAR1	no	no	no
ENSG00000105063	-0.787	19	PPP6R1	55229779	55259017	protein phosphatase ...	no	no	no	no
ENSG00000141956	0.838	21	PRDM15	41798225	41879482	PR/SET domain 15 [So...	no	no	no	no
ENSG00000186654	0.811	22	PRR5	44668547	44737681	proline rich 5 [Sour...	no	no	no	no
ENSG00000125650	0.291	19	PSPN	6375148	6379058	persephin [Source:HG...	no	no	no	no
ENSG00000174915	0.988	11	PTDSS2	448268	491399	phosphatidylserine s...	no	no	no	no
ENSG00000148344	0.319	9	PTGES	129738331	129753042	prostaglandin E synt...	no	no	no	no
ENSG00000087494	0.997	12	PTHLH	27958084	27972733	parathyroid hormone ...	no	no	no	no
ENSG00000060656	0.601	1	PTPRU	29236516	29326813	protein tyrosine pho...	no	no	no	no
ENSG00000179950	1	8	PUF60	143816344	143830709	poly(U) binding spli...	no	no	no	no
ENSG00000116260	-0.993	1	QSOX1	180154869	180204030	quiescin sulfhydryl ...	no	no	no	no
ENSG00000090565	1	16	RAB11FIP3	425649	523011	RAB11 family interac...	no	no	no	no
ENSG00000141542	-0.998	17	RAB40B	82654973	82698698	RAB40B, member RAS o...	no	no	no	no
ENSG00000101084	-0.994	20	RAB5IF	36605779	36612557	RAB5 interacting fac...	no	no	no	no
ENSG00000108557	-0.944	17	RAI1	17681458	17811453	retinoic acid induce...	no	no	no	no
ENSG00000160271	0.513	9	RALGDS	133097720	133149334	ral guanine nucleoti...	no	no	no	no
ENSG00000158987	-0.943	5	RAPGEF6	131423921	131635231	Rap guanine nucleoti...	no	no	no	no
ENSG00000185989	-0.969	13	RASA3	113977783	114132623	RAS p21 protein acti...	no	no	no	no
ENSG00000153179	0.353	12	RASSF3	64507001	64697564	Ras association doma...	no	no	no	no
ENSG00000100461	0.755	14	RBM23	22893204	22919182	RNA binding motif pr...	no	no	no	no
ENSG00000265241	0.981	1	RBM8A	145921556	145927678	RNA binding motif pr...	no	no	no	no
ENSG00000135002	-0.596	9	RFK	76385526	76394517	riboflavin kinase [S...	no	no	no	no
ENSG00000132005	0.833	19	RFX1	13961530	14007039	regulatory factor X1...	no	no	no	no
ENSG00000064490	0.514	19	RFXANK	19192229	19201869	regulatory factor X ...	no	no	no	no
ENSG00000133874	0.967	8	RNF122	33547754	33567128	ring finger protein ...	no	no	no	no
ENSG00000070423	0.334	19	RNF126	647526	663233	ring finger protein ...	no	no	no	no
ENSG00000116514	-0.867	1	RNF19B	32936445	32964809	ring finger protein ...	no	no	no	no
ENSG00000173456	0.792	11	RNF26	119334527	119337309	ring finger protein ...	no	no	no	no
ENSG00000181031	-0.976	17	RPH3AL	212389	386254	rabphilin 3A like (w...	no	no	no	no
ENSG00000105640	-0.842	19	RPL18A	17859910	17864153	ribosomal protein L1...	no	no	no	no
ENSG00000117676	0.994	1	RPS6KA1	26529761	26575030	ribosomal protein S6...	no	no	no	no
ENSG00000156990	-0.992	3	RPUSD3	9837849	9844602	RNA pseudouridine sy...	no	no	no	no
ENSG00000160208	-0.989	21	RRP1B	43659560	43696079	ribosomal RNA proces...	no	no	no	no
ENSG00000117616	-0.5	1	RSRP1	25242249	25338213	arginine and serine ...	no	no	no	no
ENSG00000139970	-0.859	14	RTN1	59595976	59870776	reticulon 1 [Source:...	no	no	no	no
ENSG00000175792	0.624	3	RUVBL1	128064778	128153914	RuvB like AAA ATPase...	no	no	no	no
ENSG00000163191	0.991	1	S100A11	152032506	152047907	S100 calcium binding...	no	no	no	no
ENSG00000116497	0.996	1	S100PBP	32816767	32858875	S100P binding protei...	no	no	no	no
ENSG00000167100	0.447	17	SAMD14	50110040	50130160	sterile alpha motif ...	no	no	no	no
ENSG00000111961	-0.942	6	SASH1	148272304	148552044	SAM and SH3 domain c...	no	no	no	no
ENSG00000119042	-0.852	2	SATB2	199269505	199471266	SATB homeobox 2 [Sou...	no	no	no	no
ENSG00000073578	-0.907	5	SDHA	218303	257082	succinate dehydrogen...	no	no	no	no
ENSG00000265808	0.993	1	SEC22B	120150898	120176520	SEC22 homolog B, ves...	no	no	no	no
ENSG00000141574	-0.974	17	SECTM1	82321024	82334074	secreted and transme...	no	no	no	no
ENSG00000091490	-0.961	4	SEL1L3	25747433	25863760	SEL1L family member ...	no	no	no	no
ENSG00000138468	0.748	3	SENP7	101324205	101513241	SUMO specific peptid...	no	no	no	no
ENSG00000138758	0.624	4	SEPTIN11	76949751	77040384	septin 11 [Source:HG...	no	no	no	no
ENSG00000185917	-0.985	21	SETD4	36034541	36079389	SET domain containin...	no	no	no	no
ENSG00000115128	0.994	2	SF3B6	24067586	24076373	splicing factor 3b s...	no	no	no	no
ENSG00000144040	0.598	2	SFXN5	72942036	73075619	sideroflexin 5 [Sour...	no	no	no	no
ENSG00000176476	-0.797	16	SGF29	28553915	28591790	SAGA complex associa...	no	no	no	no
ENSG00000118473	0.209	1	SGIP1	66533267	66751139	SH3GL interacting en...	no	no	no	no
ENSG00000118515	0.695	6	SGK1	134169248	134318112	serum/glucocorticoid...	no	no	no	no
ENSG00000104969	-0.486	19	SGTA	2754715	2783362	small glutamine rich...	no	no	no	no
ENSG00000178188	-0.979	16	SH2B1	28846600	28874212	SH2B adaptor protein...	no	no	no	no
ENSG00000214193	0.985	1	SH3D21	36306368	36329340	SH3 domain containin...	no	no	no	no
ENSG00000112246	-0.961	6	SIM1	100385009	100464921	SIM bHLH transcripti...	no	no	no	no
ENSG00000159263	0.92	21	SIM2	36699115	36749917	SIM bHLH transcripti...	no	no	no	no
ENSG00000105738	-0.209	19	SIPA1L3	37907208	38208369	signal induced proli...	no	no	no	no
ENSG00000158296	-0.996	20	SLC13A3	46557823	46684467	solute carrier famil...	no	no	no	no
ENSG00000173638	-0.849	21	SLC19A1	45493572	45573365	solute carrier famil...	no	no	no	no
ENSG00000074621	-0.501	15	SLC24A1	65611366	65660995	solute carrier famil...	no	no	no	no
ENSG00000100075	0.493	22	SLC25A1	19175581	19178739	solute carrier famil...	no	no	no	no
ENSG00000148339	0.614	9	SLC25A25	128068201	128109245	solute carrier famil...	no	no	no	no
ENSG00000181035	0.871	19	SLC25A42	19063994	19113030	solute carrier famil...	no	no	no	no
ENSG00000215790	-0.484	1	SLC35E2A	1734690	1739557	solute carrier famil...	no	no	no	no
ENSG00000111371	0.45	12	SLC38A1	46183063	46270017	solute carrier famil...	no	no	no	no
ENSG00000139209	-0.529	12	SLC38A4	46764761	46832408	solute carrier famil...	no	no	no	no
ENSG00000133065	-1	1	SLC41A1	205789094	205813748	solute carrier famil...	no	no	no	no
ENSG00000090020	0.957	1	SLC9A1	27098809	27166981	solute carrier famil...	no	no	no	no
ENSG00000166949	0.99	15	SMAD3	67063763	67195173	SMAD family member 3...	no	no	no	no
ENSG00000102172	-0.894	X	SMS	21940709	21994837	spermine synthase [S...	no	no	no	yes
ENSG00000124380	-0.803	2	SNRNP27	69893956	69905575	small nuclear ribonu...	no	no	no	no
ENSG00000178996	-0.789	5	SNX18	54517759	54546586	sorting nexin 18 [So...	no	no	no	no
ENSG00000124104	-0.605	20	SNX21	45833799	45843276	sorting nexin family...	no	no	no	no
ENSG00000154556	0.578	4	SORBS2	185585444	185956652	sorbin and SH3 domai...	no	no	no	no
ENSG00000217236	-0.358	2	SP9	174334954	174338500	Sp9 transcription fa...	no	no	no	no
ENSG00000008294	0.46	17	SPAG9	50962174	51120868	sperm associated ant...	no	no	no	no
ENSG00000134668	0.994	1	SPOCD1	31790422	31816022	SPOC domain containi...	no	no	no	no
ENSG00000005206	-0.916	19	SPPL2B	2328615	2355095	signal peptide pepti...	no	no	no	no
ENSG00000115306	-0.356	2	SPTBN1	54456317	54671446	spectrin beta, non-e...	no	no	no	no
ENSG00000137877	0.655	15	SPTBN5	41848146	41894053	spectrin beta, non-e...	no	no	no	no
ENSG00000196220	-0.401	3	SRGAP3	8980591	9363053	SLIT-ROBO Rho GTPase...	no	no	no	no
ENSG00000174780	1	4	SRP72	56467617	56503681	signal recognition p...	no	no	no	no
ENSG00000130511	-0.997	19	SSBP4	18418864	18434562	single stranded DNA ...	no	no	no	no
ENSG00000185482	-0.775	12	STAC3	57243453	57251188	SH3 and cysteine ric...	no	no	no	no
ENSG00000164647	-0.993	7	STEAP1	90154456	90164829	STEAP family member ...	no	no	no	no
ENSG00000115107	-0.961	2	STEAP3	119223831	119265652	STEAP3 metalloreduct...	no	no	no	no
ENSG00000109689	-0.997	4	STIM2	26857601	27025381	stromal interaction ...	no	no	no	no
ENSG00000118046	-0.235	19	STK11	1177558	1228431	serine/threonine kin...	no	no	no	no
ENSG00000204344	0.524	6	STK19	31971091	31982821	serine/threonine kin...	no	no	no	no
ENSG00000243317	0.92	7	STMP1	135662496	135693418	short transmembrane ...	no	no	no	no
ENSG00000001460	0.422	1	STPG1	24356999	24416934	sperm tail PG-rich r...	no	no	no	no
ENSG00000106089	-0.799	7	STX1A	73699206	73719672	syntaxin 1A [Source:...	no	no	no	no
ENSG00000166900	0.711	11	STX3	59713456	59805882	syntaxin 3 [Source:H...	no	no	no	no
ENSG00000076944	-0.528	19	STXBP2	7636772	7647873	syntaxin binding pro...	no	no	no	no
ENSG00000164828	0.848	7	SUN1	816615	896435	Sad1 and UNC84 domai...	no	no	no	no
ENSG00000198673	-0.925	12	TAFA2	61708273	62279150	TAFA chemokine like ...	no	no	no	no
ENSG00000167291	-0.996	17	TBC1D16	79932343	80035872	TBC1 domain family m...	no	no	no	no
ENSG00000141556	-0.679	17	TBCD	82752042	82945914	tubulin folding cofa...	no	no	no	no
ENSG00000121068	0.388	17	TBX2	61399843	61409466	T-box transcription ...	no	no	no	no
ENSG00000089225	-0.928	12	TBX5	114353911	114408442	T-box transcription ...	no	no	no	no
ENSG00000255399	-0.944	12	TBX5-AS1	114408131	114412832	TBX5 antisense RNA 1...	no	no	no	no
ENSG00000118526	-0.711	6	TCF21	133889113	133895553	transcription factor...	no	no	no	no
ENSG00000112941	-0.539	5	TENT4A	6713432	6757044	terminal nucleotidyl...	no	no	no	no
ENSG00000068323	-0.545	X	TFE3	49028726	49043410	transcription factor...	no	no	no	yes
ENSG00000035862	-0.957	17	TIMP2	78852977	78925387	TIMP metallopeptidas...	no	no	no	no
ENSG00000166548	-0.782	16	TK2	66508003	66552544	thymidine kinase 2 [...	no	no	no	no
ENSG00000065717	0.994	19	TLE2	2997639	3047635	TLE family member 2,...	no	no	no	no
ENSG00000146872	0.999	17	TLK2	62458658	62615481	tousled like kinase ...	no	no	no	no
ENSG00000184277	-0.263	15	TM2D3	101621444	101652391	TM2 domain containin...	no	no	no	no
ENSG00000185475	-0.76	11	TMEM179B	62787402	62790400	transmembrane protei...	no	no	no	no
ENSG00000168569	0.852	11	TMEM223	62771629	62792006	transmembrane protei...	no	no	no	no
ENSG00000155755	0.234	2	TMEM237	201620184	201643570	transmembrane protei...	no	no	no	no
ENSG00000205090	-0.995	1	TMEM240	1534778	1540624	transmembrane protei...	no	no	no	no
ENSG00000134825	-0.628	11	TMEM258	61768501	61792802	transmembrane protei...	no	no	no	no
ENSG00000177042	-0.24	11	TMEM80	695591	705028	transmembrane protei...	no	no	no	no
ENSG00000257167	-0.957	12	TMPO-AS1	98512973	98516422	TMPO antisense RNA 1...	no	no	no	no
ENSG00000185215	-0.728	14	TNFAIP2	103121476	103137439	TNF alpha induced pr...	no	no	no	no
ENSG00000100354	-0.96	22	TNRC6B	40044817	40335808	trinucleotide repeat...	no	no	no	no
ENSG00000158882	0.813	1	TOMM40L	161225939	161230746	translocase of outer...	no	no	no	no
ENSG00000184428	-0.998	8	TOP1MT	143304384	143359979	DNA topoisomerase I ...	no	no	no	no
ENSG00000167912	-0.584	8	TOX-DT	59119040	59123478	TOX divergent transc...	no	no	no	no
ENSG00000143514	0.851	1	TP53BP2	223779893	223845954	tumor protein p53 bi...	no	no	no	no
ENSG00000131653	-0.833	16	TRAF7	2155698	2178129	TNF receptor associa...	no	no	no	no
ENSG00000171853	-0.856	2	TRAPPC12	3379675	3485094	trafficking protein ...	no	no	no	no
ENSG00000147573	0.267	8	TRIM55	66126896	66175485	tripartite motif con...	no	no	no	no
ENSG00000145331	0.952	4	TRMT10A	99546709	99564039	tRNA methyltransfera...	no	no	no	no
ENSG00000167723	-0.991	17	TRPV3	3510502	3557812	transient receptor p...	no	no	no	no
ENSG00000005379	-0.949	17	TSPOAP1	58301228	58328795	TSPO associated prot...	no	no	no	no
ENSG00000128159	-0.544	22	TUBGCP6	50217689	50245023	tubulin gamma comple...	no	no	no	no
ENSG00000153443	-0.709	16	UBALD1	4608883	4615027	UBA like domain cont...	no	no	no	no
ENSG00000109332	-0.988	4	UBE2D3	102794383	102868896	ubiquitin conjugatin...	no	no	no	no
ENSG00000118900	0.345	16	UBN1	4846665	4882401	ubinuclein 1 [Source...	no	no	no	no
ENSG00000127540	-0.874	19	UQCR11	1597169	1605473	ubiquinol-cytochrome...	no	no	no	no
ENSG00000055483	-0.999	17	USP36	78787381	78841441	ubiquitin specific p...	no	no	no	no
ENSG00000106346	0.978	7	USP42	6104949	6161564	ubiquitin specific p...	no	no	no	no
ENSG00000090686	0.284	1	USP48	21678298	21783606	ubiquitin specific p...	no	no	no	no
ENSG00000168140	0.981	16	VASN	4371848	4383538	vasorin [Source:HGNC...	no	no	no	no
ENSG00000171724	0.926	16	VAT1L	77788564	77980107	vesicle amine transp...	no	no	no	no
ENSG00000071127	0.478	4	WDR1	10068089	10116972	WD repeat domain 1 [...	no	no	no	no
ENSG00000178252	-0.795	3	WDR6	49007062	49015953	WD repeat domain 6 [...	no	no	no	no
ENSG00000100219	0.54	22	XBP1	28794555	28800597	X-box binding protei...	no	no	no	no
ENSG00000132953	1	13	XPO4	20777329	20903048	exportin 4 [Source:H...	no	no	no	no
ENSG00000073050	-0.567	19	XRCC1	43543311	43580473	X-ray repair cross c...	no	no	no	no
ENSG00000159714	-0.576	16	ZDHHC1	67394152	67416833	zinc finger DHHC-typ...	no	no	no	no
ENSG00000086666	-0.772	15	ZFAND6	80059568	80138393	zinc finger AN1-type...	no	no	no	no
ENSG00000152977	0.998	3	ZIC1	147393422	147510293	Zic family member 1 ...	no	no	no	no
ENSG00000174963	0.979	3	ZIC4	147386046	147406809	Zic family member 4 ...	no	no	no	no
ENSG00000122515	-0.577	7	ZMIZ2	44748581	44769881	zinc finger MIZ-type...	no	no	no	no
ENSG00000103994	0.955	15	ZNF106	42412823	42491141	zinc finger protein ...	no	no	no	no
ENSG00000147394	0.981	X	ZNF185	152898067	152973481	zinc finger protein ...	no	no	no	yes
ENSG00000171940	-0.661	20	ZNF217	53567071	53609907	zinc finger protein ...	no	no	no	no
ENSG00000165804	-0.763	14	ZNF219	21090077	21104722	zinc finger protein ...	no	no	no	no
ENSG00000196150	0.68	8	ZNF250	144876497	144902168	zinc finger protein ...	no	no	no	no
ENSG00000160908	-0.954	7	ZNF394	99473877	99504857	zinc finger protein ...	no	no	no	no
ENSG00000133250	-0.765	19	ZNF414	8509678	8514167	zinc finger protein ...	no	no	no	no
ENSG00000112200	-0.808	6	ZNF451	57086844	57170305	zinc finger protein ...	no	no	no	no
ENSG00000198597	1	19	ZNF536	30224891	30713586	zinc finger protein ...	no	no	no	no
ENSG00000147789	-0.222	8	ZNF7	144827518	144847509	zinc finger protein ...	no	no	no	no
ENSG00000175691	0.953	19	ZNF77	2933218	2944971	zinc finger protein ...	no	no	no	no
ENSG00000267254	0.304	19	ZNF790-AS1	36797501	36831596	ZNF790 antisense RNA...	no	no	no	no
ENSG00000236609	0.96	7	ZNF853	6615610	6624290	zinc finger protein ...	no	no	no	no
ENSG00000213793	1	19	ZNF888	52904415	52923470	zinc finger protein ...	no	no	no	no
ENSG00000286039	-0.952	4		173508072	173511790	novel transcript	no	no	no	no
ENSG00000287853	-0.938	20		34132270	34136485	novel transcript	no	no	no	no
ENSG00000262003	-0.928	17		909632	911212	novel transcript, an...	no	no	no	no
ENSG00000280351	-0.783	17		81003335	81005132	TEC	no	no	no	no
ENSG00000274370	-0.623	17		83098377	83098987	novel transcript	no	no	no	no
ENSG00000254510	-0.576	11		66409158	66417227	novel transcript	no	no	no	no
ENSG00000285331	-0.535	15		56795460	56918499	novel transcript	no	no	no	no
ENSG00000260517	-0.255	16		29139661	29216706	novel transcript	no	no	no	no
ENSG00000259807	0.202	16		29215385	29221040	novel transcript	no	no	no	no
ENSG00000255508	0.47	11		62559603	62591531	novel protein	no	no	no	no

## Sheet: Gene Body
Supplemental Data S8: List of DEGs correlating with DMRs in 47,XYY vs. 46,XY Fibroblasts at the gene bodies.
Ensembl_id	cor	chromosome_name	hgnc_symbol	start_position	end_position	description	isPAR	escape_Tukianien	variable_Tukianien	inactive_Tukianien
ENSG00000100154	-1	22	TTC28	27978014	28679840	tetratricopeptide re...	no	no	no	no
ENSG00000105605	-1	19	CACNG7	53909278	53943950	calcium voltage-gate...	no	no	no	no
ENSG00000173706	-1	3	HEG1	124965710	125055997	heart development pr...	no	no	no	no
ENSG00000133943	-1	14	DGLUCY	91060333	91225632	D-glutamate cyclase ...	no	no	no	no
ENSG00000123810	-1	19	B9D2	41354417	41364165	B9 domain containing...	no	no	no	no
ENSG00000183287	-1	18	CCBE1	59430939	59697662	collagen and calcium...	no	no	no	no
ENSG00000124788	-1	6	ATXN1	16299112	16761491	ataxin 1 [Source:HGN...	no	no	no	no
ENSG00000183778	-0.999	21	B3GALT5	39556442	39673137	beta-1,3-galactosylt...	no	no	no	no
ENSG00000075618	-0.999	7	FSCN1	5592816	5606655	fascin actin-bundlin...	no	no	no	no
ENSG00000122705	-0.998	9	CLTA	36190856	36304781	clathrin light chain...	no	no	no	no
ENSG00000137767	-0.997	15	SQOR	45631148	45691281	sulfide quinone oxid...	no	no	no	no
ENSG00000141564	-0.997	17	RPTOR	80544819	80966371	regulatory associate...	no	no	no	no
ENSG00000103647	-0.997	15	CORO2B	68578993	68727806	coronin 2B [Source:H...	no	no	no	no
ENSG00000249859	-0.996	8	PVT1	127794526	128187101	Pvt1 oncogene [Sourc...	no	no	no	no
ENSG00000148341	-0.993	9	SH3GLB2	129007036	129028331	SH3 domain containin...	no	no	no	no
ENSG00000219438	-0.992	22	TAFA5	48489553	48850912	TAFA chemokine like ...	no	no	no	no
ENSG00000100647	-0.991	14	SUSD6	69611596	69715144	sushi domain contain...	no	no	no	no
ENSG00000122696	-0.991	9	SLC25A51	37879400	37904353	solute carrier famil...	no	no	no	no
ENSG00000102804	-0.989	13	TSC22D1	44432143	44577147	TSC22 domain family ...	no	no	no	no
ENSG00000198768	-0.989	20	APCDD1L	58459101	58515399	APC down-regulated 1...	no	no	no	no
ENSG00000133318	-0.988	11	RTN3	63681446	63759891	reticulon 3 [Source:...	no	no	no	no
ENSG00000035862	-0.988	17	TIMP2	78852977	78925387	TIMP metallopeptidas...	no	no	no	no
ENSG00000171988	-0.987	10	JMJD1C	63167221	63521850	jumonji domain conta...	no	no	no	no
ENSG00000073464	-0.983	X	CLCN4	10156975	10237660	chloride voltage-gat...	no	no	no	yes
ENSG00000176994	-0.982	17	SMCR8	18315293	18328056	SMCR8-C9orf72 comple...	no	no	no	no
ENSG00000136859	-0.982	9	ANGPTL2	127087348	127122635	angiopoietin like 2 ...	no	no	no	no
ENSG00000262185	-0.981	16	LINC02861	3930806	3950586	long intergenic non-...	no	no	no	no
ENSG00000183044	-0.98	16	ABAT	8674596	8784575	4-aminobutyrate amin...	no	no	no	no
ENSG00000039139	-0.978	5	DNAH5	13690328	14011818	dynein axonemal heav...	no	no	no	no
ENSG00000055483	-0.976	17	USP36	78787381	78841441	ubiquitin specific p...	no	no	no	no
ENSG00000009335	-0.973	7	UBE3C	157138916	157269370	ubiquitin protein li...	no	no	no	no
ENSG00000198752	-0.971	14	CDC42BPB	102932380	103057549	CDC42 binding protei...	no	no	no	no
ENSG00000187609	-0.97	9	EXD3	137306896	137423211	exonuclease 3'-5' do...	no	no	no	no
ENSG00000025796	-0.961	6	SEC63	107867756	107958208	SEC63 homolog, prote...	no	no	no	no
ENSG00000071054	-0.961	2	MAP4K4	101696850	101894690	mitogen-activated pr...	no	no	no	no
ENSG00000133961	-0.959	14	NUMB	73275107	73458617	NUMB endocytic adapt...	no	no	no	no
ENSG00000227036	-0.956	17	LINC00511	72290091	72640472	long intergenic non-...	no	no	no	no
ENSG00000137601	-0.955	4	NEK1	169369704	169612632	NIMA related kinase ...	no	no	no	no
ENSG00000065320	-0.952	17	NTN1	9021510	9244000	netrin 1 [Source:HGN...	no	no	no	no
ENSG00000154710	-0.952	7	RABGEF1	66682164	66811464	RAB guanine nucleoti...	no	no	no	no
ENSG00000074047	-0.951	2	GLI2	120735623	120992653	GLI family zinc fing...	no	no	no	no
ENSG00000105576	-0.947	19	TNPO2	12699201	12724011	transportin 2 [Sourc...	no	no	no	no
ENSG00000143819	-0.947	1	EPHX1	225810124	225845563	epoxide hydrolase 1 ...	no	no	no	no
ENSG00000014164	-0.946	8	ZC3H3	143437659	143541447	zinc finger CCCH-typ...	no	no	no	no
ENSG00000175727	-0.946	12	MLXIP	122078756	122147344	MLX interacting prot...	no	no	no	no
ENSG00000163637	-0.944	3	PRICKLE2	64092236	64445476	prickle planar cell ...	no	no	no	no
ENSG00000233901	-0.942	9	LINC01503	129332300	129359549	long intergenic non-...	no	no	no	no
ENSG00000158747	-0.942	1	NBL1	19596979	19658456	NBL1, DAN family BMP...	no	no	no	no
ENSG00000136378	-0.936	15	ADAMTS7	78759206	78811464	ADAM metallopeptidas...	no	no	no	no
ENSG00000140538	-0.933	15	NTRK3	87859751	88256791	neurotrophic recepto...	no	no	no	no
ENSG00000141867	-0.926	19	BRD4	15235519	15332545	bromodomain containi...	no	no	no	no
ENSG00000198807	-0.921	14	PAX9	36657568	36679362	paired box 9 [Source...	no	no	no	no
ENSG00000111961	-0.921	6	SASH1	148272304	148552044	SAM and SH3 domain c...	no	no	no	no
ENSG00000069020	-0.916	5	MAST4	66596380	67169593	microtubule associat...	no	no	no	no
ENSG00000076555	-0.915	12	ACACB	109116587	109268226	acetyl-CoA carboxyla...	no	no	no	no
ENSG00000269190	-0.909	19	FBXO17	38941401	38975742	F-box protein 17 [So...	no	no	no	no
ENSG00000157933	-0.907	1	SKI	2227388	2310213	SKI proto-oncogene [...	no	no	no	no
ENSG00000108175	-0.906	10	ZMIZ1	79068966	79316519	zinc finger MIZ-type...	no	no	no	no
ENSG00000170921	-0.899	17	TANC2	62966235	63427703	tetratricopeptide re...	no	no	no	no
ENSG00000132334	-0.899	10	PTPRE	127907103	128085855	protein tyrosine pho...	no	no	no	no
ENSG00000158122	-0.899	9	PRXL2C	96639577	96655317	peroxiredoxin like 2...	no	no	no	no
ENSG00000129084	-0.898	11	PSMA1	14504874	14643635	proteasome 20S subun...	no	no	no	no
ENSG00000119772	-0.897	2	DNMT3A	25227855	25342590	DNA methyltransferas...	no	no	no	no
ENSG00000117298	-0.897	1	ECE1	21217247	21345572	endothelin convertin...	no	no	no	no
ENSG00000215421	-0.896	18	ZNF407	74597870	75065671	zinc finger protein ...	no	no	no	no
ENSG00000161179	-0.895	22	YDJC	21628089	21630064	YdjC chitooligosacch...	no	no	no	no
ENSG00000187239	-0.892	9	FNBP1	129887187	130043189	formin binding prote...	no	no	no	no
ENSG00000077942	-0.892	22	FBLN1	45502238	45601135	fibulin 1 [Source:HG...	no	no	no	no
ENSG00000189058	-0.889	3	APOD	195568705	195584033	apolipoprotein D [So...	no	no	no	no
ENSG00000133243	-0.887	19	BTBD2	1985438	2034881	BTB domain containin...	no	no	no	no
ENSG00000110080	-0.884	11	ST3GAL4	126355640	126440344	ST3 beta-galactoside...	no	no	no	no
ENSG00000185008	-0.883	3	ROBO2	75906695	77649964	roundabout guidance ...	no	no	no	no
ENSG00000183666	-0.882	5	GUSBP1	21459560	21501826	GUSB pseudogene 1 [S...	no	no	no	no
ENSG00000135372	-0.882	11	NAT10	34105617	34147670	N-acetyltransferase ...	no	no	no	no
ENSG00000166855	-0.88	15	CLPX	65148219	65185342	caseinolytic mitocho...	no	no	no	no
ENSG00000121104	-0.878	17	FAM117A	49710332	49789180	family with sequence...	no	no	no	no
ENSG00000127663	-0.878	19	KDM4B	4969113	5153598	lysine demethylase 4...	no	no	no	no
ENSG00000100207	-0.874	22	TCF20	42160013	42343616	transcription factor...	no	no	no	no
ENSG00000153395	-0.872	5	LPCAT1	1456480	1523962	lysophosphatidylchol...	no	no	no	no
ENSG00000182197	-0.869	8	EXT1	117794490	118111826	exostosin glycosyltr...	no	no	no	no
ENSG00000023171	-0.868	11	GRAMD1B	123358428	123627774	GRAM domain containi...	no	no	no	no
ENSG00000084090	-0.863	2	STARD7	96184859	96208827	StAR related lipid t...	no	no	no	no
ENSG00000066629	-0.862	14	EML1	99737693	99942060	EMAP like 1 [Source:...	no	no	no	no
ENSG00000076248	-0.862	12	UNG	109097597	109126725	uracil DNA glycosyla...	no	no	no	no
ENSG00000171621	-0.861	1	SPSB1	9292894	9369532	splA/ryanodine recep...	no	no	no	no
ENSG00000179152	-0.853	3	TCAIM	44338119	44409451	T cell activation in...	no	no	no	no
ENSG00000124225	-0.842	20	PMEPA1	57648392	57711536	prostate transmembra...	no	no	no	no
ENSG00000159433	-0.842	15	STARD9	42575606	42720998	StAR related lipid t...	no	no	no	no
ENSG00000229847	-0.839	10	EMX2OS	117473215	117545068	EMX2 opposite strand...	no	no	no	no
ENSG00000198169	-0.836	8	ZNF251	144720907	144756417	zinc finger protein ...	no	no	no	no
ENSG00000203709	-0.832	1	MIR29B2CHG	207801518	207879115	MIR29B2 and MIR29C h...	no	no	no	no
ENSG00000231290	-0.832	20	APCDD1L-DT	58515379	58619888	APCDD1L divergent tr...	no	no	no	no
ENSG00000159267	-0.827	21	HLCS	36748626	36990236	holocarboxylase synt...	no	no	no	no
ENSG00000101605	-0.826	18	MYOM1	3066807	3219968	myomesin 1 [Source:H...	no	no	no	no
ENSG00000074370	-0.825	17	ATP2A3	3923870	3964464	ATPase sarcoplasmic/...	no	no	no	no
ENSG00000122420	-0.817	1	PTGFR	78303884	78540701	prostaglandin F rece...	no	no	no	no
ENSG00000131724	-0.817	X	IL13RA1	118727133	118794535	interleukin 13 recep...	no	no	no	yes
ENSG00000100614	-0.815	14	PPM1A	60245752	60299087	protein phosphatase,...	no	no	no	no
ENSG00000146648	-0.802	7	EGFR	55019017	55211628	epidermal growth fac...	no	no	no	no
ENSG00000073146	-0.801	22	MOV10L1	50089879	50161690	Mov10 like RISC comp...	no	no	no	no
ENSG00000124785	-0.799	6	NRN1	5997999	6007605	neuritin 1 [Source:H...	no	no	no	no
ENSG00000136828	-0.788	9	RALGPS1	126914774	127223166	Ral GEF with PH doma...	no	no	no	no
ENSG00000187955	-0.787	8	COL14A1	120059780	120373573	collagen type XIV al...	no	no	no	no
ENSG00000198720	-0.784	17	ANKRD13B	29589769	29614761	ankyrin repeat domai...	no	no	no	no
ENSG00000131323	-0.78	14	TRAF3	102777449	102911500	TNF receptor associa...	no	no	no	no
ENSG00000121281	-0.776	16	ADCY7	50246137	50318135	adenylate cyclase 7 ...	no	no	no	no
ENSG00000162804	-0.775	2	SNED1	240998618	241095568	sushi, nidogen and E...	no	no	no	no
ENSG00000232821	-0.773	7		19112474	19114271	novel transcript	no	no	no	no
ENSG00000104375	-0.772	8	STK3	98371228	98942827	serine/threonine kin...	no	no	no	no
ENSG00000128274	-0.764	22	A4GALT	42692121	42721298	alpha 1,4-galactosyl...	no	no	no	no
ENSG00000145934	-0.753	5	TENM2	166979029	168264157	teneurin transmembra...	no	no	no	no
ENSG00000162618	-0.752	1	ADGRL4	78889764	79282124	adhesion G protein-c...	no	no	no	no
ENSG00000167522	-0.751	16	ANKRD11	89267630	89490561	ankyrin repeat domai...	no	no	no	no
ENSG00000175110	-0.747	3	MRPS22	139005806	139360497	mitochondrial riboso...	no	no	no	no
ENSG00000138032	-0.744	2	PPM1B	44167969	44244384	protein phosphatase,...	no	no	no	no
ENSG00000107130	-0.739	9	NCS1	130172404	130237303	neuronal calcium sen...	no	no	no	no
ENSG00000167703	-0.735	17	SLC43A2	1569268	1628886	solute carrier famil...	no	no	no	no
ENSG00000078269	-0.722	6	SYNJ2	157981863	158099176	synaptojanin 2 [Sour...	no	no	no	no
ENSG00000139364	-0.696	12	TMEM132B	125186386	125662377	transmembrane protei...	no	no	no	no
ENSG00000070495	-0.695	17	JMJD6	76712832	76726799	jumonji domain conta...	no	no	no	no
ENSG00000154102	-0.69	16	C16orf74	85690084	85751129	chromosome 16 open r...	no	no	no	no
ENSG00000176463	-0.69	15	SLCO3A1	91853708	92172435	solute carrier organ...	no	no	no	no
ENSG00000131018	-0.684	6	SYNE1	152121687	152637801	spectrin repeat cont...	no	no	no	no
ENSG00000105053	-0.683	19	VRK3	49976468	50025946	VRK serine/threonine...	no	no	no	no
ENSG00000063438	-0.681	5	AHRR	321714	438291	aryl hydrocarbon rec...	no	no	no	no
ENSG00000152580	-0.679	3	IGSF10	151425384	151461061	immunoglobulin super...	no	no	no	no
ENSG00000239305	-0.675	2	RNF103	86603398	86623866	ring finger protein ...	no	no	no	no
ENSG00000127616	-0.672	19	SMARCA4	10960932	11079426	SWI/SNF related, mat...	no	no	no	no
ENSG00000106089	-0.667	7	STX1A	73699206	73719672	syntaxin 1A [Source:...	no	no	no	no
ENSG00000142235	-0.659	19	LMTK3	48485271	48513935	lemur tyrosine kinas...	no	no	no	no
ENSG00000132938	-0.644	13	MTUS2	28820339	29505947	microtubule associat...	no	no	no	no
ENSG00000137714	-0.643	11	FDX1	110429948	110464884	ferredoxin 1 [Source...	no	no	no	no
ENSG00000111252	-0.641	12	SH2B3	111405923	111451623	SH2B adaptor protein...	no	no	no	no
ENSG00000143995	-0.64	2	MEIS1	66433452	66573869	Meis homeobox 1 [Sou...	no	no	no	no
ENSG00000151773	-0.625	13	CCDC122	43823909	43879740	coiled-coil domain c...	no	no	no	no
ENSG00000198246	-0.62	10	SLC29A3	71319259	71381423	solute carrier famil...	no	no	no	no
ENSG00000106772	-0.613	9	PRUNE2	76611376	76906114	prune homolog 2 with...	no	no	no	no
ENSG00000136830	-0.603	9	NIBAN2	127505339	127578989	niban apoptosis regu...	no	no	no	no
ENSG00000011105	-0.596	12	TSPAN9	3077355	3286564	tetraspanin 9 [Sourc...	no	no	no	no
ENSG00000154928	-0.592	3	EPHB1	134795260	135260467	EPH receptor B1 [Sou...	no	no	no	no
ENSG00000130703	-0.583	20	OSBPL2	62231922	62296213	oxysterol binding pr...	no	no	no	no
ENSG00000116128	-0.583	1	BCL9	147541501	147626216	BCL9 transcription c...	no	no	no	no
ENSG00000185585	-0.576	9	OLFML2A	124777133	124814885	olfactomedin like 2A...	no	no	no	no
ENSG00000106610	-0.57	7	STAG3L4	67305987	67309715	stromal antigen 3-li...	no	no	no	no
ENSG00000135111	-0.57	12	TBX3	114670255	114684175	T-box transcription ...	no	no	no	no
ENSG00000128923	-0.547	15	MINDY2	58771192	58861900	MINDY lysine 48 deub...	no	no	no	no
ENSG00000173218	-0.543	1	VANGL1	115641970	115698224	VANGL planar cell po...	no	no	no	no
ENSG00000203805	-0.534	10	PLPP4	120457227	120592065	phospholipid phospha...	no	no	no	no
ENSG00000133805	-0.525	11	AMPD3	10308313	10507579	adenosine monophosph...	no	no	no	no
ENSG00000100364	-0.515	22	KIAA0930	45192244	45240894	KIAA0930 [Source:HGN...	no	no	no	no
ENSG00000169071	-0.508	9	ROR2	91563091	91950228	receptor tyrosine ki...	no	no	no	no
ENSG00000160271	-0.508	9	RALGDS	133097720	133149334	ral guanine nucleoti...	no	no	no	no
ENSG00000214717	-0.494	X	ZBED1	2486414	2500976	zinc finger BED-type...	PAR1	no	no	no
ENSG00000130720	-0.491	9	FIBCD1	130902438	130939286	fibrinogen C domain ...	no	no	no	no
ENSG00000168675	-0.488	18	LDLRAD4	13217498	13652755	low density lipoprot...	no	no	no	no
ENSG00000156515	-0.485	10	HK1	69269984	69401884	hexokinase 1 [Source...	no	no	no	no
ENSG00000165752	-0.483	10	STK32C	132207492	132331847	serine/threonine kin...	no	no	no	no
ENSG00000108001	-0.482	10	EBF3	129835233	129973053	EBF transcription fa...	no	no	no	no
ENSG00000067955	-0.481	16	CBFB	67028984	67101058	core-binding factor ...	no	no	no	no
ENSG00000179242	-0.478	20	CDH4	61252261	61940617	cadherin 4 [Source:H...	no	no	no	no
ENSG00000132680	-0.468	1	KHDC4	155913045	155934413	KH domain containing...	no	no	no	no
ENSG00000145332	-0.468	4	KLHL8	87160103	87240314	kelch like family me...	no	no	no	no
ENSG00000182492	-0.46	X	BGN	153494980	153509546	biglycan [Source:HGN...	no	no	no	yes
ENSG00000143549	-0.438	1	TPM3	154155308	154194648	tropomyosin 3 [Sourc...	no	no	no	no
ENSG00000178163	-0.436	4	ZNF518B	10439880	10457426	zinc finger protein ...	no	no	no	no
ENSG00000141905	-0.431	19	NFIC	3314403	3469217	nuclear factor I C [...	no	no	no	no
ENSG00000130544	-0.402	19	ZNF557	7069703	7087968	zinc finger protein ...	no	no	no	no
ENSG00000089057	-0.401	20	SLC23A2	4852356	5010293	solute carrier famil...	no	no	no	no
ENSG00000116183	-0.4	1	PAPPA2	176463171	176845601	pappalysin 2 [Source...	no	no	no	no
ENSG00000163697	-0.399	4	APBB2	40810027	41216714	amyloid beta precurs...	no	no	no	no
ENSG00000183337	-0.398	X	BCOR	40049815	40177329	BCL6 corepressor [So...	no	no	no	yes
ENSG00000146966	-0.387	7	DENND2A	140518420	140673993	DENN domain containi...	no	no	no	no
ENSG00000105662	-0.376	19	CRTC1	18683678	18782333	CREB regulated trans...	no	no	no	no
ENSG00000066933	-0.371	15	MYO9A	71822291	72118577	myosin IXA [Source:H...	no	no	no	no
ENSG00000143457	-0.324	1	GOLPH3L	150646230	150697154	golgi phosphoprotein...	no	no	no	no
ENSG00000054611	-0.322	22	TBC1D22A	46762617	47175699	TBC1 domain family m...	no	no	no	no
ENSG00000168785	-0.318	4	TSPAN5	98470367	98658611	tetraspanin 5 [Sourc...	no	no	no	no
ENSG00000196358	-0.317	9	NTNG2	132162058	132244526	netrin G2 [Source:HG...	no	no	no	no
ENSG00000105771	-0.31	19	SMG9	43727983	43754962	SMG9 nonsense mediat...	no	no	no	no
ENSG00000130856	-0.306	18	ZNF236	76822557	76972901	zinc finger protein ...	no	no	no	no
ENSG00000068383	-0.302	10	INPP5A	132537787	132783480	inositol polyphospha...	no	no	no	no
ENSG00000150907	-0.301	13	FOXO1	40555667	40666641	forkhead box O1 [Sou...	no	no	no	no
ENSG00000196562	-0.27	20	SULF2	47656197	47786616	sulfatase 2 [Source:...	no	no	no	no
ENSG00000197256	-0.237	19	KANK2	11164270	11197791	KN motif and ankyrin...	no	no	no	no
ENSG00000138101	-0.23	2	DTNB	25377198	25673647	dystrobrevin beta [S...	no	no	no	no
ENSG00000033800	-0.224	15	PIAS1	68054309	68198603	protein inhibitor of...	no	no	no	no
ENSG00000105855	-0.208	7	ITGB8	20330702	20415754	integrin subunit bet...	no	no	no	no
ENSG00000160256	0.21	21	SLX9	44940012	44976989	SLX9 ribosome biogen...	no	no	no	no
ENSG00000187498	0.221	13	COL4A1	110148963	110307157	collagen type IV alp...	no	no	no	no
ENSG00000106346	0.224	7	USP42	6104949	6161564	ubiquitin specific p...	no	no	no	no
ENSG00000143614	0.224	1	GATAD2B	153789030	153923360	GATA zinc finger dom...	no	no	no	no
ENSG00000154358	0.229	1	OBSCN	228208044	228378876	obscurin, cytoskelet...	no	no	no	no
ENSG00000143469	0.244	1	SYT14	209900923	210171389	synaptotagmin 14 [So...	no	no	no	no
ENSG00000196730	0.248	9	DAPK1	87497228	87708634	death associated pro...	no	no	no	no
ENSG00000167106	0.255	9	FAM102A	127940582	127980989	family with sequence...	no	no	no	no
ENSG00000175866	0.277	17	BAIAP2	81035122	81117434	BAR/IMD domain conta...	no	no	no	no
ENSG00000182185	0.292	14	RAD51B	67819779	68730218	RAD51 paralog B [Sou...	no	no	no	no
ENSG00000141753	0.293	17	IGFBP4	40443450	40457725	insulin like growth ...	no	no	no	no
ENSG00000167674	0.299	19	HDGFL2	4472297	4502208	HDGF like 2 [Source:...	no	no	no	no
ENSG00000153944	0.3	17	MSI2	57255851	57684689	musashi RNA binding ...	no	no	no	no
ENSG00000164062	0.317	3	APEH	49674014	49683971	acylaminoacyl-peptid...	no	no	no	no
ENSG00000138162	0.334	10	TACC2	121989163	122254545	transforming acidic ...	no	no	no	no
ENSG00000136930	0.341	9	PSMB7	124353465	124415444	proteasome 20S subun...	no	no	no	no
ENSG00000113368	0.343	5	LMNB1	126776623	126837020	lamin B1 [Source:HGN...	no	no	no	no
ENSG00000120899	0.35	8	PTK2B	27311482	27459391	protein tyrosine kin...	no	no	no	no
ENSG00000139971	0.356	14	ARMH4	57999735	58298139	armadillo like helic...	no	no	no	no
ENSG00000069424	0.357	1	KCNAB2	5990927	6101193	potassium voltage-ga...	no	no	no	no
ENSG00000141279	0.363	17	NPEPPS	47522942	47624665	aminopeptidase purom...	no	no	no	no
ENSG00000148737	0.364	10	TCF7L2	112950247	113167678	transcription factor...	no	no	no	no
ENSG00000177788	0.373	1	RAB4A-AS1	229256892	229271242	RAB4A antisense RNA ...	no	no	no	no
ENSG00000204104	0.392	2	TRAF3IP1	238320441	238400897	TRAF3 interacting pr...	no	no	no	no
ENSG00000187210	0.402	9	GCNT1	76419850	76651203	glucosaminyl (N-acet...	no	no	no	no
ENSG00000189223	0.403	2	PAX8-AS1	113211421	113276581	PAX8 antisense RNA 1...	no	no	no	no
ENSG00000197766	0.407	19	CFD	859453	867884	complement factor D ...	no	no	no	no
ENSG00000182985	0.417	11	CADM1	115169218	115504957	cell adhesion molecu...	no	no	no	no
ENSG00000185049	0.422	4	NELFA	1982717	2041903	negative elongation ...	no	no	no	no
ENSG00000108669	0.422	17	CYTH1	78674048	78782297	cytohesin 1 [Source:...	no	no	no	no
ENSG00000154511	0.425	1	DIPK1A	92832737	92961522	divergent protein ki...	no	no	no	no
ENSG00000157617	0.427	21	C2CD2	41885112	41954018	C2 calcium dependent...	no	no	no	no
ENSG00000167632	0.434	8	TRAPPC9	139727725	140458579	trafficking protein ...	no	no	no	no
ENSG00000239264	0.435	6	TXNDC5	7881517	7910788	thioredoxin domain c...	no	no	no	no
ENSG00000087116	0.438	5	ADAMTS2	179110853	179345461	ADAM metallopeptidas...	no	no	no	no
ENSG00000148180	0.449	9	GSN	121207794	121332843	gelsolin [Source:HGN...	no	no	no	no
ENSG00000130762	0.452	1	ARHGEF16	3454665	3481113	Rho guanine nucleoti...	no	no	no	no
ENSG00000147454	0.46	8	SLC25A37	23528956	23575463	solute carrier famil...	no	no	no	no
ENSG00000141252	0.471	17	VPS53	508503	721717	VPS53 subunit of GAR...	no	no	no	no
ENSG00000153071	0.473	5	DAB2	39371675	39462300	DAB adaptor protein ...	no	no	no	no
ENSG00000132359	0.489	17	RAP1GAP2	2755705	3037741	RAP1 GTPase activati...	no	no	no	no
ENSG00000125741	0.496	19	OPA3	45527767	45602212	outer mitochondrial ...	no	no	no	no
ENSG00000065457	0.505	16	ADAT1	75596868	75623300	adenosine deaminase ...	no	no	no	no
ENSG00000072571	0.508	5	HMMR	163460203	163491941	hyaluronan mediated ...	no	no	no	no
ENSG00000159842	0.513	17	ABR	1003519	1229738	ABR activator of Rho...	no	no	no	no
ENSG00000166669	0.517	16	ATF7IP2	10326434	10483638	activating transcrip...	no	no	no	no
ENSG00000115129	0.52	2	TP53I3	24077433	24085861	tumor protein p53 in...	no	no	no	no
ENSG00000105656	0.52	19	ELL	18442663	18522116	elongation factor fo...	no	no	no	no
ENSG00000184985	0.537	4	SORCS2	7192538	7742836	sortilin related VPS...	no	no	no	no
ENSG00000133019	0.553	1	CHRM3	239386565	239915452	cholinergic receptor...	no	no	no	no
ENSG00000058085	0.565	1	LAMC2	183186238	183245127	laminin subunit gamm...	no	no	no	no
ENSG00000184489	0.582	8	PTP4A3	141391995	141432454	protein tyrosine pho...	no	no	no	no
ENSG00000134321	0.584	2	RSAD2	6865557	6898239	radical S-adenosyl m...	no	no	no	no
ENSG00000169436	0.585	8	COL22A1	138588235	138914041	collagen type XXII a...	no	no	no	no
ENSG00000198796	0.586	18	ALPK2	58481247	58629091	alpha kinase 2 [Sour...	no	no	no	no
ENSG00000144040	0.588	2	SFXN5	72942036	73075619	sideroflexin 5 [Sour...	no	no	no	no
ENSG00000126705	0.589	1	AHDC1	27534035	27604431	AT-hook DNA binding ...	no	no	no	no
ENSG00000142552	0.597	19	RCN3	49528003	49546962	reticulocalbin 3 [So...	no	no	no	no
ENSG00000092621	0.623	1	PHGDH	119648411	119744218	phosphoglycerate deh...	no	no	no	no
ENSG00000146426	0.634	6	TIAM2	154832697	155257723	TIAM Rac1 associated...	no	no	no	no
ENSG00000204650	0.648	17	LINC02210	45620328	45655156	long intergenic non-...	no	no	no	no
ENSG00000273186	0.659	9		128431598	128432006	novel transcript, se...	no	no	no	no
ENSG00000185274	0.667	7	GALNT17	71132144	71713600	polypeptide N-acetyl...	no	no	no	no
ENSG00000115355	0.672	2	CCDC88A	55287842	55419895	coiled-coil domain c...	no	no	no	no
ENSG00000108840	0.683	17	HDAC5	44076746	44123702	histone deacetylase ...	no	no	no	no
ENSG00000115041	0.69	2	KCNIP3	95297327	95386077	potassium voltage-ga...	no	no	no	no
ENSG00000101974	0.697	X	ATP11C	139726346	139945276	ATPase phospholipid ...	no	no	no	yes
ENSG00000143924	0.698	2	EML4	42169353	42332548	EMAP like 4 [Source:...	no	no	no	no
ENSG00000135903	0.708	2	PAX3	222199887	222298998	paired box 3 [Source...	no	no	no	no
ENSG00000148848	0.72	10	ADAM12	126012381	126388477	ADAM metallopeptidas...	no	no	no	no
ENSG00000198373	0.729	16	WWP2	69762328	69941741	WW domain containing...	no	no	no	no
ENSG00000197467	0.732	10	COL13A1	69801880	69964275	collagen type XIII a...	no	no	no	no
ENSG00000143147	0.734	1	GPR161	168079542	168137667	G protein-coupled re...	no	no	no	no
ENSG00000169129	0.76	10	AFAP1L2	114294824	114404756	actin filament assoc...	no	no	no	no
ENSG00000167264	0.775	16	DUS2	67987746	68079320	dihydrouridine synth...	no	no	no	no
ENSG00000087495	0.777	20	PHACTR3	59577509	59847711	phosphatase and acti...	no	no	no	no
ENSG00000005471	0.778	7	ABCB4	87401696	87480435	ATP binding cassette...	no	no	no	no
ENSG00000241878	0.783	22	PISD	31618491	31662221	phosphatidylserine d...	no	no	no	no
ENSG00000130309	0.785	19	COLGALT1	17555649	17583162	collagen beta(1-O)ga...	no	no	no	no
ENSG00000170485	0.785	2	NPAS2	100820139	100996829	neuronal PAS domain ...	no	no	no	no
ENSG00000129355	0.787	19	CDKN2D	10566460	10569059	cyclin dependent kin...	no	no	no	no
ENSG00000196498	0.805	12	NCOR2	124324415	124567612	nuclear receptor cor...	no	no	no	no
ENSG00000132801	0.809	20	ZSWIM3	45857614	45879122	zinc finger SWIM-typ...	no	no	no	no
ENSG00000065809	0.815	10	FAM107B	14518557	14774897	family with sequence...	no	no	no	no
ENSG00000142611	0.815	1	PRDM16	3069168	3438621	PR/SET domain 16 [So...	no	no	no	no
ENSG00000122778	0.817	7	KIAA1549	138831381	138981389	KIAA1549 [Source:HGN...	no	no	no	no
ENSG00000146540	0.817	7	C7orf50	996986	1138260	chromosome 7 open re...	no	no	no	no
ENSG00000182362	0.823	21	YBEY	46286342	46297751	ybeY metalloendoribo...	no	no	no	no
ENSG00000154237	0.825	15	LRRK1	100919327	101078257	leucine rich repeat ...	no	no	no	no
ENSG00000188677	0.836	22	PARVB	43999211	44172939	parvin beta [Source:...	no	no	no	no
ENSG00000164916	0.85	7	FOXK1	4682295	4771442	forkhead box K1 [Sou...	no	no	no	no
ENSG00000162836	0.856	1	ACP6	147629652	147670524	acid phosphatase 6, ...	no	no	no	no
ENSG00000121440	0.858	3	PDZRN3	73382431	73624941	PDZ domain containin...	no	no	no	no
ENSG00000019485	0.86	11	PRDM11	45095806	45235110	PR/SET domain 11 [So...	no	no	no	no
ENSG00000122694	0.864	9	GLIPR2	36136536	36163913	GLI pathogenesis rel...	no	no	no	no
ENSG00000144488	0.865	2	ESPNL	238100340	238133287	espin like [Source:H...	no	no	no	no
ENSG00000079313	0.867	19	REXO1	1815248	1848483	RNA exonuclease 1 ho...	no	no	no	no
ENSG00000102755	0.871	13	FLT1	28300346	28495145	fms related receptor...	no	no	no	no
ENSG00000171798	0.874	10	KNDC1	133160219	133226412	kinase non-catalytic...	no	no	no	no
ENSG00000100304	0.874	22	TTLL12	43166622	43187134	tubulin tyrosine lig...	no	no	no	no
ENSG00000157350	0.877	16	ST3GAL2	70375977	70439237	ST3 beta-galactoside...	no	no	no	no
ENSG00000170417	0.879	2	TMEM182	102736905	103019900	transmembrane protei...	no	no	no	no
ENSG00000059573	0.88	10	ALDH18A1	95605941	95656711	aldehyde dehydrogena...	no	no	no	no
ENSG00000092208	0.887	14	GEMIN2	39114285	39136973	gem nuclear organell...	no	no	no	no
ENSG00000156011	0.889	8	PSD3	18527303	19084730	pleckstrin and Sec7 ...	no	no	no	no
ENSG00000140743	0.891	16	CDR2	22345936	22437165	cerebellar degenerat...	no	no	no	no
ENSG00000120694	0.892	13	HSPH1	31134973	31162388	heat shock protein f...	no	no	no	no
ENSG00000128573	0.897	7	FOXP2	114086327	114693772	forkhead box P2 [Sou...	no	no	no	no
ENSG00000173230	0.898	3	GOLGB1	121663199	121749966	golgin B1 [Source:HG...	no	no	no	no
ENSG00000030110	0.898	6	BAK1	33572547	33580293	BCL2 antagonist/kill...	no	no	no	no
ENSG00000187605	0.899	2	TET3	73984910	74108176	tet methylcytosine d...	no	no	no	no
ENSG00000102572	0.899	13	STK24	98445185	98577940	serine/threonine kin...	no	no	no	no
ENSG00000072958	0.9	19	AP1M1	16197854	16245906	adaptor related prot...	no	no	no	no
ENSG00000034053	0.901	15	APBA2	28884483	29118315	amyloid beta precurs...	no	no	no	no
ENSG00000198947	0.903	X	DMD	31097677	33339609	dystrophin [Source:H...	no	no	no	yes
ENSG00000166685	0.906	17	COG1	73193055	73208507	component of oligome...	no	no	no	no
ENSG00000100242	0.908	22	SUN2	38733290	38794143	Sad1 and UNC84 domai...	no	no	no	no
ENSG00000174705	0.91	5	SH3PXD2B	172325000	172454525	SH3 and PX domains 2...	no	no	no	no
ENSG00000127445	0.913	19	PIN1	9835257	9849689	peptidylprolyl cis/t...	no	no	no	no
ENSG00000131149	0.913	16	GSE1	85169525	85676204	Gse1 coiled-coil pro...	no	no	no	no
ENSG00000153707	0.915	9	PTPRD	8314246	10613002	protein tyrosine pho...	no	no	no	no
ENSG00000275832	0.92	17	ARHGAP23	38419280	38512385	Rho GTPase activatin...	no	no	no	no
ENSG00000068745	0.921	3	IP6K2	48688003	48740353	inositol hexakisphos...	no	no	no	no
ENSG00000165392	0.922	8	WRN	31033788	31176138	WRN RecQ like helica...	no	no	no	no
ENSG00000169641	0.923	1	LUZP1	23084030	23177808	leucine zipper prote...	no	no	no	no
ENSG00000091490	0.927	4	SEL1L3	25747433	25863760	SEL1L family member ...	no	no	no	no
ENSG00000062194	0.937	5	GPBP1	57173948	57264679	GC-rich promoter bin...	no	no	no	no
ENSG00000187323	0.94	18	DCC	52340197	53535903	DCC netrin 1 recepto...	no	no	no	no
ENSG00000188385	0.94	10	JAKMIP3	132036336	132184858	Janus kinase and mic...	no	no	no	no
ENSG00000167461	0.945	19	RAB8A	16111889	16134234	RAB8A, member RAS on...	no	no	no	no
ENSG00000159399	0.945	2	HK2	74834127	74893359	hexokinase 2 [Source...	no	no	no	no
ENSG00000172893	0.945	11	DHCR7	71428193	71452868	7-dehydrocholesterol...	no	no	no	no
ENSG00000160293	0.946	9	VAV2	133761894	133992604	vav guanine nucleoti...	no	no	no	no
ENSG00000136802	0.947	9	LRRC8A	128882133	128918039	leucine rich repeat ...	no	no	no	no
ENSG00000138119	0.949	10	MYOF	93306429	93482334	myoferlin [Source:HG...	no	no	no	no
ENSG00000102606	0.95	13	ARHGEF7	111114559	111305737	Rho guanine nucleoti...	no	no	no	no
ENSG00000050767	0.951	5	COL23A1	178237476	178590393	collagen type XXIII ...	no	no	no	no
ENSG00000154914	0.952	17	USP43	9644698	9729687	ubiquitin specific p...	no	no	no	no
ENSG00000088899	0.953	20	LZTS3	3162617	3173549	leucine zipper tumor...	no	no	no	no
ENSG00000106688	0.955	9	SLC1A1	4490468	4587469	solute carrier famil...	no	no	no	no
ENSG00000158169	0.955	9	FANCC	95099054	95426796	FA complementation g...	no	no	no	no
ENSG00000135749	0.957	1	PCNX2	232983435	233295725	pecanex 2 [Source:HG...	no	no	no	no
ENSG00000131016	0.958	6	AKAP12	151239967	151358559	A-kinase anchoring p...	no	no	no	no
ENSG00000221818	0.958	8	EBF2	25841725	26045413	EBF transcription fa...	no	no	no	no
ENSG00000075340	0.96	2	ADD2	70607618	70768225	adducin 2 [Source:HG...	no	no	no	no
ENSG00000196581	0.965	1	AJAP1	4654609	4792534	adherens junctions a...	no	no	no	no
ENSG00000160208	0.966	21	RRP1B	43659560	43696079	ribosomal RNA proces...	no	no	no	no
ENSG00000122547	0.966	7	EEPD1	36153254	36301538	endonuclease/exonucl...	no	no	no	no
ENSG00000167693	0.966	17	NXN	799310	979776	nucleoredoxin [Sourc...	no	no	no	no
ENSG00000007168	0.968	17	PAFAH1B1	2593210	2685615	platelet activating ...	no	no	no	no
ENSG00000185896	0.97	13	LAMP1	113297239	113323672	lysosomal associated...	no	no	no	no
ENSG00000099889	0.972	22	ARVCF	19969896	20016823	ARVCF delta catenin ...	no	no	no	no
ENSG00000171456	0.974	20	ASXL1	32358330	32439319	ASXL transcriptional...	no	no	no	no
ENSG00000121210	0.982	4	TMEM131L	153466346	153636711	transmembrane 131 li...	no	no	no	no
ENSG00000197712	0.982	4	FAM114A1	38867677	38945739	family with sequence...	no	no	no	no
ENSG00000184349	0.983	5	EFNA5	107376894	107670937	ephrin A5 [Source:HG...	no	no	no	no
ENSG00000104325	0.985	8	DECR1	90001405	90053633	2,4-dienoyl-CoA redu...	no	no	no	no
ENSG00000273213	0.986	1	H3-7	143894544	143905977	H3.7 histone (putati...	no	no	no	no
ENSG00000244578	0.986	3	LINC01391	138935189	138944020	long intergenic non-...	no	no	no	no
ENSG00000080854	0.987	11	IGSF9B	133896438	133956968	immunoglobulin super...	no	no	no	no
ENSG00000172115	0.987	7	CYCS	25118656	25125260	cytochrome c, somati...	no	no	no	no
ENSG00000172262	0.987	5	ZNF131	43065176	43192021	zinc finger protein ...	no	no	no	no
ENSG00000167487	0.988	19	KLHL26	18637025	18671721	kelch like family me...	no	no	no	no
ENSG00000188153	0.988	X	COL4A5	108439838	108697545	collagen type IV alp...	no	no	no	yes
ENSG00000151240	0.988	10	DIP2C	274190	689668	disco interacting pr...	no	no	no	no
ENSG00000196588	0.988	22	MRTFA	40410281	40636719	myocardin related tr...	no	no	no	no
ENSG00000154678	0.99	7	PDE1C	31751179	32428131	phosphodiesterase 1C...	no	no	no	no
ENSG00000132932	0.99	13	ATP8A2	25371974	26025851	ATPase phospholipid ...	no	no	no	no
ENSG00000166123	0.991	16	GPT2	46884362	46931289	glutamic--pyruvic tr...	no	no	no	no
ENSG00000105088	0.993	19	OLFM2	9853718	9936515	olfactomedin 2 [Sour...	no	no	no	no
ENSG00000105426	0.993	19	PTPRS	5158495	5340812	protein tyrosine pho...	no	no	no	no
ENSG00000152484	0.994	13	USP12	27066156	27171811	ubiquitin specific p...	no	no	no	no
ENSG00000134815	0.995	19	DHX34	47349315	47382704	DExH-box helicase 34...	no	no	no	no
ENSG00000134996	0.995	9	OSTF1	75088514	75147265	osteoclast stimulati...	no	no	no	no
ENSG00000113448	0.996	5	PDE4D	58969038	60522120	phosphodiesterase 4D...	no	no	no	no
ENSG00000152284	0.997	2	TCF7L1	85133392	85310387	transcription factor...	no	no	no	no
ENSG00000141447	0.997	18	OSBPL1A	24162045	24397880	oxysterol binding pr...	no	no	no	no
ENSG00000233818	0.998	21	CLDN14-AS1	36445731	36532408	CLDN14 antisense RNA...	no	no	no	no
ENSG00000152977	0.999	3	ZIC1	147393422	147510293	Zic family member 1 ...	no	no	no	no
ENSG00000196365	0.999	19	LONP1	5691834	5720572	lon peptidase 1, mit...	no	no	no	no
ENSG00000182534	0.999	17	MXRA7	76672551	76711004	matrix remodeling as...	no	no	no	no
ENSG00000129682	0.999	X	FGF13	138614727	139222777	fibroblast growth fa...	no	no	yes	no
ENSG00000186111	0.999	19	PIP5K1C	3630183	3700468	phosphatidylinositol...	no	no	no	no
ENSG00000185960	0.999	X	SHOX	624344	659411	short stature homeob...	PAR1	no	no	no
ENSG00000130749	0.999	19	ZC3H4	47064187	47113776	zinc finger CCCH-typ...	no	no	no	no
ENSG00000110047	0.999	11	EHD1	64851642	64888296	EH domain containing...	no	no	no	no
ENSG00000138759	1	4	FRAS1	78057323	78544269	Fraser extracellular...	no	no	no	no
ENSG00000108395	1	17	TRIM37	58982638	59106921	tripartite motif con...	no	no	no	no
ENSG00000131196	1	18	NFATC1	79395856	79529325	nuclear factor of ac...	no	no	no	no
ENSG00000169862	1	5	CTNND2	10971836	11904446	catenin delta 2 [Sou...	no	no	no	no
ENSG00000142798	1	1	HSPG2	21822244	21937310	heparan sulfate prot...	no	no	no	no
ENSG00000099331	1	19	MYO9B	17075777	17214537	myosin IXB [Source:H...	no	no	no	no

## Sheet: Legend
Supplemental Data S8: Correlation analysis between gene expression and gene methylation status in 47,XYY vs 46,XY fibroblasts. For each gene, we compute a correlation value that correlates the average methylation value of the DMRs with the expression of the gene, we kept genes with a coefficient of determination 𝑅2 higher than 0.2 (absolute number).
