# Supplementary material for: An iPSC-based model of 47,XYY Jacobs syndrome reveals a DNA methylation-independent transcriptional dysregulation shared with male X aneuploid cells
Source: Genome Res. 2025 Jul;35(7):1503–17. doi: 10.1101/gr.279716.124 (PMC12212075; doi:10.1101/gr.279716.124)
Supplement: Supplement 13 [file Supplemental_Data_S12_R3.xlsx]

## Sheet: JS3_CloneC
Chr Y Simulation
Geneid	Gene Length	Unique reads	Total Reads	Multimapping reads	Mutlimapping reads over total reads (%)	Unique reads over total reads (%)	chromosome_name	hgnc_symbol	start_position	end_position	description	isPAR	escape_Tukianien	variable_Tukianien	inactive_Tukianien
ENSG00000227232	1351	483	2424	1941	80	19.9257	1	WASH7P	14404	29570	WASP family homolog ...	no	no	no	no
ENSG00000278267	68	33	33	0	0	100	1	MIR6859-1	17369	17436	microRNA 6859-1 [Sou...	no	no	no	no
ENSG00000243485	1021	4	61	57	93	6.55738	1	MIR1302-2HG	29554	31109	MIR1302-2 host gene ...	no	no	no	no
ENSG00000233750	3812	10	50	40	80	20	1	CICP27	131025	134836	capicua transcriptio...	no	no	no	no
ENSG00000268903	755	300	1780	1480	83	16.8539	1		135141	135895	novel pseudogene	no	no	no	no
ENSG00000269981	284	405	563	158	28	71.9361	1		137682	137965	novel pseudogene	no	no	no	no
ENSG00000239906	323	6	404	398	98	1.48515	1		139790	140339	novel transcript	no	no	no	no
ENSG00000241860	7559	194	2702	2508	92	7.17987	1		141474	173862	novel transcript	no	no	no	no
ENSG00000279457	1397	534	2182	1648	75	24.473	1	WASH9P	185217	195411	WAS protein family h...	no	no	no	no
ENSG00000228463	8224	2	140	138	98	1.42857	1		257864	359681	ribosomal protein L2...	no	no	no	no
ENSG00000237094	6204	483	5323	4840	90	9.07383	1		485026	485208	pseudogene similar t...	no	no	no	no
ENSG00000250575	1239	7	2365	2358	99	0.295983	1		491225	493241	novel pseudogene	no	no	no	no
ENSG00000230021	5495	67	685	618	90	9.78102	1		586071	827796	septin 14 (SEPT14) p...	no	no	no	no
ENSG00000225972	372	4	124	120	96	3.22581	1	MTND1P23	629062	629433	MT-ND1 pseudogene 23...	no	no	no	no
ENSG00000225630	1044	346	24070	23724	98	1.43747	1	MTND2P28	629640	630683	MT-ND2 pseudogene 28...	no	no	no	no
ENSG00000237973	1543	840	23263	22423	96	3.61088	1	MTCO1P12	631074	632616	MT-CO1 pseudogene 12...	no	no	no	no
ENSG00000229344	682	2	34	32	94	5.88235	1	MTCO2P12	632757	633438	MT-CO2 pseudogene 12...	no	no	no	no
ENSG00000240409	207	11	11	0	0	100	1	MTATP8P1	633535	633741	MT-ATP8 pseudogene 1...	no	no	no	no
ENSG00000248527	681	9833	24354	14521	59	40.3753	1	MTATP6P1	633696	634376	MT-ATP6 pseudogene 1...	no	no	no	no
ENSG00000198744	547	16	18	2	11	88.8889	1	MTCO3P12	634376	634922	MT-CO3 pseudogene 12...	no	no	no	no
ENSG00000229376	2455	4	17	13	76	23.5294	1	CICP3	722092	724903	capicua transcriptio...	no	no	no	no
ENSG00000228327	6432	678	6188	5510	89	10.9567	1		764723	774280	general transcriptio...	no	no	no	no
ENSG00000237491	8413	143	185	42	22	77.2973	1	LINC01409	778747	810065	long intergenic non-...	no	no	no	no
ENSG00000230092	872	3	3	0	0	100	1		805799	810161	F-box only protein 2...	no	no	no	no
ENSG00000228794	15682	477	537	60	11	88.8268	1	LINC01128	825138	859446	long intergenic non-...	no	no	no	no
ENSG00000225880	1317	37	41	4	9	90.2439	1	LINC00115	824228	827539	long intergenic non-...	no	no	no	no
ENSG00000288531	3292	7	7	0	0	100	1		860226	868202	novel transcript	no	no	no	no
ENSG00000272438	351	6	6	0	0	100	1		904834	915976	novel transcript	no	no	no	no
ENSG00000230699	3043	17	17	0	0	100	1		911435	914948	novel transcript	no	no	no	no
ENSG00000223764	4152	43	43	0	0	100	1	LINC02593	916865	921016	long intergenic non-...	no	no	no	no
ENSG00000187634	4173	4	4	0	0	100	1	SAMD11	923923	944575	sterile alpha motif ...	no	no	no	no
ENSG00000188976	5540	8007	8031	24	0	99.7012	1	NOC2L	944203	959309	NOC2 like nucleolar ...	no	no	no	no
ENSG00000187961	3402	2409	2409	0	0	100	1	KLHL17	960584	965719	kelch like family me...	no	no	no	no
ENSG00000187583	3451	65	65	0	0	100	1	PLEKHN1	966482	975865	pleckstrin homology ...	no	no	no	no
ENSG00000272512	2086	6	6	0	0	100	1		995966	998051	novel transcript	no	no	no	no
ENSG00000188290	1118	126	126	0	0	100	1	HES4	998962	1000172	hes family bHLH tran...	no	no	no	no
ENSG00000187608	867	805	809	4	0	99.5056	1	ISG15	1001138	1014540	ISG15 ubiquitin like...	no	no	no	no
ENSG00000188157	10761	26552	26624	72	0	99.7296	1	AGRN	1020120	1056118	agrin [Source:HGNC S...	no	no	no	no
ENSG00000217801	2203	183	183	0	0	100	1		1063079	1069355	protein tyrosine pho...	no	no	no	no
ENSG00000273443	829	12	12	0	0	100	1		1062208	1063288	novel transcript	no	no	no	no
ENSG00000131591	6322	813	813	0	0	100	1	C1orf159	1081818	1116361	chromosome 1 open re...	no	no	no	no
ENSG00000285812	1095	10	10	0	0	100	1		1097585	1104598	novel transcript, an...	no	no	no	no
ENSG00000223823	1620	3	3	0	0	100	1	LINC01342	1137017	1144056	long intergenic non-...	no	no	no	no
ENSG00000198976	83	3	3	0	0	100	1	MIR429	1169005	1169087	microRNA 429 [Source...	no	no	no	no
ENSG00000272141	987	53	53	0	0	100	1		1169357	1170343	novel transcript	no	no	no	no
ENSG00000205231	3532	14	14	0	0	100	1	TTLL10-AS1	1173056	1179555	TTLL10 antisense RNA...	no	no	no	no
ENSG00000162571	3998	126	126	0	0	100	1	TTLL10	1173880	1197936	tubulin tyrosine lig...	no	no	no	no
ENSG00000186891	1271	31	35	4	11	88.5714	1	TNFRSF18	1203508	1206592	TNF receptor superfa...	no	no	no	no
ENSG00000078808	4745	4663	4677	14	0	99.7007	1	SDF4	1216931	1232031	stromal cell derived...	no	no	no	no
ENSG00000176022	2805	848	848	0	0	100	1	B3GALT6	1232237	1235041	beta-1,3-galactosylt...	no	no	no	no
ENSG00000184163	1794	253	253	0	0	100	1	C1QTNF12	1242446	1246722	C1q and TNF related ...	no	no	no	no
ENSG00000260179	1558	69	69	0	0	100	1		1249777	1251334	novel transcript	no	no	no	no
ENSG00000160087	4691	3040	3040	0	0	100	1	UBE2J2	1253909	1273864	ubiquitin conjugatin...	no	no	no	no
ENSG00000230415	513	43	43	0	0	100	1	LINC01786	1275223	1280420	long intergenic non-...	no	no	no	no
ENSG00000162572	4025	322	322	0	0	100	1	SCNN1D	1280436	1292029	sodium channel epith...	no	no	no	no
ENSG00000131584	8707	2408	2440	32	1	98.6885	1	ACAP3	1292390	1309609	ArfGAP with coiled-c...	no	no	no	no
ENSG00000169972	2459	1027	1043	16	1	98.466	1	PUSL1	1308597	1311677	pseudouridine syntha...	no	no	no	no
ENSG00000127054	8216	6565	6583	18	0	99.7266	1	INTS11	1311585	1324687	integrator complex s...	no	no	no	no
ENSG00000240731	386	192	200	8	4	96	1		1317581	1318689	novel transcript	no	no	no	no
ENSG00000224051	2555	424	440	16	3	96.3636	1	CPTP	1324756	1328896	ceramide-1-phosphate...	no	no	no	no
ENSG00000107404	3882	5285	5289	4	0	99.9244	1	DVL1	1335276	1349418	dishevelled segment ...	no	no	no	no
ENSG00000162576	3622	590	590	0	0	100	1	MXRA8	1352689	1361777	matrix remodeling as...	no	no	no	no
ENSG00000175756	1669	4378	4390	12	0	99.7267	1	AURKAIP1	1373730	1375207	aurora kinase A inte...	no	no	no	no
ENSG00000221978	6857	7986	8046	60	0	99.2543	1	CCNL2	1385711	1399335	cyclin L2 [Source:HG...	no	no	no	no
ENSG00000224870	2527	924	924	0	0	100	1	MRPL20-AS1	1399515	1402046	MRPL20 antisense RNA...	no	no	no	no
ENSG00000242485	2767	2754	2758	4	0	99.855	1	MRPL20	1401909	1407293	mitochondrial riboso...	no	no	no	no
ENSG00000272455	1523	279	281	2	0	99.2883	1	MRPL20-DT	1409096	1410618	MRPL20 divergent tra...	no	no	no	no
ENSG00000235098	2644	125	125	0	0	100	1	ANKRD65	1418420	1421769	ankyrin repeat domai...	no	no	no	no
ENSG00000225905	543	30	30	0	0	100	1	ANKRD65-AS1	1420245	1422691	ANKRD65 antisense RN...	no	no	no	no
ENSG00000205116	492	39	39	0	0	100	1	TMEM88B	1425871	1430255	transmembrane protei...	no	no	no	no
ENSG00000225285	851	103	103	0	0	100	1	LINC01770	1430539	1434573	long intergenic non-...	no	no	no	no
ENSG00000179403	5065	2151	2151	0	0	100	1	VWA1	1434861	1442882	von Willebrand facto...	no	no	no	no
ENSG00000215915	3981	56	195	139	71	28.7179	1	ATAD3C	1449689	1470163	ATPase family AAA do...	no	no	no	no
ENSG00000160072	7686	3271	4273	1002	23	76.5504	1	ATAD3B	1471765	1497848	ATPase family AAA do...	no	no	no	no
ENSG00000284740	660	2	2	0	0	100	1		1503582	1509351	ATPase family, AAA d...	no	no	no	no
ENSG00000197785	3344	3511	4967	1456	29	70.6865	1	ATAD3A	1512162	1534685	ATPase family AAA do...	no	no	no	no
ENSG00000205090	2009	228	228	0	0	100	1	TMEM240	1534778	1540624	transmembrane protei...	no	no	no	no
ENSG00000160075	6919	7474	7495	21	0	99.7198	1	SSU72	1541673	1574863	SSU72 homolog, RNA p...	no	no	no	no
ENSG00000215014	2349	26	26	0	0	100	1		1574102	1577075	novel transcript	no	no	no	no
ENSG00000228594	2124	830	838	8	0	99.0453	1	FNDC10	1598012	1600135	fibronectin type III...	no	no	no	no
ENSG00000286989	1830	70	70	0	0	100	1		1600314	1602703	novel transcript	no	no	no	no
ENSG00000272106	2038	270	270	0	0	100	1		1613758	1615795	artifact	no	no	no	no
ENSG00000197530	8767	2389	2393	4	0	99.8328	1	MIB2	1615454	1630605	MIB E3 ubiquitin pro...	no	no	no	no
ENSG00000189409	2205	182	924	742	80	19.697	1	MMP23B	1632163	1635263	matrix metallopeptid...	no	no	no	no
ENSG00000248333	3488	4149	7101	2952	41	58.4284	1	CDK11B	1635225	1659012	cyclin dependent kin...	no	no	no	no
ENSG00000189339	8462	4635	6229	1594	25	74.41	1	SLC35E2B	1659529	1692795	solute carrier famil...	no	no	no	no
ENSG00000269737	1819	197	203	6	2	97.0443	1		1671990	1674397	ribosomal protein S7...	no	no	no	no
ENSG00000215914	1017	12	689	677	98	1.74165	1	MMP23A	1699942	1701782	matrix metallopeptid...	no	no	no	no
ENSG00000008128	5085	136	238	102	42	57.1429	1	CDK11A	1702379	1724357	cyclin dependent kin...	no	no	no	no
ENSG00000268575	5079	146	152	6	3	96.0526	1		1702736	1737688	novel transcript, re...	no	no	no	no
ENSG00000227775	2759	52	52	0	0	100	1		1724512	1737251	ribosomal protein S7...	no	no	no	no
ENSG00000215790	7713	859	2165	1306	60	39.6767	1	SLC35E2A	1734690	1739557	solute carrier famil...	no	no	no	no
ENSG00000008130	5570	4043	4664	621	13	86.6852	1	NADK	1751232	1780457	NAD kinase [Source:H...	no	no	no	no
ENSG00000078369	6417	25827	25958	131	0	99.4953	1	GNB1	1785285	1892292	G protein subunit be...	no	no	no	no
ENSG00000169885	2040	132	132	0	0	100	1	CALML6	1915108	1917296	calmodulin like 6 [S...	no	no	no	no
ENSG00000178821	1600	622	642	20	3	96.8847	1	TMEM52	1917590	1919279	transmembrane protei...	no	no	no	no
ENSG00000142609	10422	18	18	0	0	100	1	CFAP74	1921951	2003837	cilia and flagella a...	no	no	no	no
ENSG00000233542	2063	22	22	0	0	100	1		2013213	2015639	novel transcript	no	no	no	no
ENSG00000187730	5525	94	94	0	0	100	1	GABRD	2019329	2030758	gamma-aminobutyric a...	no	no	no	no
ENSG00000226969	538	12	12	0	0	100	1	PRKCZ-DT	2049203	2050070	PRKCZ divergent tran...	no	no	no	no
ENSG00000067606	7695	1620	1620	0	0	100	1	PRKCZ	2050411	2185395	protein kinase C zet...	no	no	no	no
ENSG00000271806	4196	8	8	0	0	100	1		2141084	2145279	novel transcript, an...	no	no	no	no
ENSG00000182873	1734	199	199	0	0	100	1	PRKCZ-AS1	2181794	2184389	PRKCZ antisense RNA ...	no	no	no	no
ENSG00000162585	10916	2587	2587	0	0	100	1	FAAP20	2184461	2212720	FA core complex asso...	no	no	no	no
ENSG00000157933	6550	10231	10407	176	1	98.3088	1	SKI	2227388	2310213	SKI proto-oncogene [...	no	no	no	no
ENSG00000287356	5794	178	178	0	0	100	1		2315040	2323085	novel transcript, an...	no	no	no	no
ENSG00000116151	11337	277	277	0	0	100	1	MORN1	2321253	2391707	MORN repeat containi...	no	no	no	no
ENSG00000272161	493	2	2	0	0	100	1		2326201	2326693	novel transcript, se...	no	no	no	no
ENSG00000269896	2407	33	33	0	0	100	1		2350414	2352820	small nuclear ribonu...	no	no	no	no
ENSG00000272420	568	6	6	0	0	100	1		2363061	2363628	novel transcript, se...	no	no	no	no
ENSG00000157916	5689	2687	2703	16	0	99.4081	1	RER1	2391775	2405442	retention in endopla...	no	no	no	no
ENSG00000157911	3782	879	879	0	0	100	1	PEX10	2403964	2413797	peroxisomal biogenes...	no	no	no	no
ENSG00000149527	10809	36	36	0	0	100	1	PLCH2	2425980	2505532	phospholipase C eta ...	no	no	no	no
ENSG00000157881	5072	2153	2153	0	0	100	1	PANK4	2508537	2526597	pantothenate kinase ...	no	no	no	no
ENSG00000197921	1324	2	2	0	0	100	1	HES5	2528745	2530263	hes family bHLH tran...	no	no	no	no
ENSG00000272449	1531	76	76	0	0	100	1		2530064	2547471	novel transcript	no	no	no	no
ENSG00000238164	6137	4	4	0	0	100	1	TNFRSF14-AS1	2549920	2557031	TNFRSF14 antisense R...	no	no	no	no
ENSG00000157873	6219	14	14	0	0	100	1	TNFRSF14	2555639	2565382	TNF receptor superfa...	no	no	no	no
ENSG00000157870	3371	1819	1823	4	0	99.7806	1	PRXL2B	2586491	2591469	peroxiredoxin like 2...	no	no	no	no
ENSG00000142606	3870	78	78	0	0	100	1	MMEL1	2590639	2633016	membrane metalloendo...	no	no	no	no
ENSG00000237058	373	4	4	0	0	100	1	MMEL1-AS1	2632568	2636620	MMEL1 antisense RNA ...	no	no	no	no
ENSG00000215912	8814	26	26	0	0	100	1	TTC34	2636986	2801693	tetratricopeptide re...	no	no	no	no
ENSG00000169717	1437	4	4	0	0	100	1	ACTRT2	3021467	3022903	actin related protei...	no	no	no	no
ENSG00000142611	9767	44	44	0	0	100	1	PRDM16	3069168	3438621	PR/SET domain 16 [So...	no	no	no	no
ENSG00000130762	5324	1317	1321	4	0	99.6972	1	ARHGEF16	3454665	3481113	Rho guanine nucleoti...	no	no	no	no
ENSG00000272088	382	3	3	0	0	100	1		3487246	3487627	novel transcript	no	no	no	no
ENSG00000162591	9021	3494	3494	0	0	100	1	MEGF6	3487951	3611508	multiple EGF like do...	no	no	no	no
ENSG00000238260	622	18	18	0	0	100	1		3622857	3624786	novel transcript	no	no	no	no
ENSG00000158109	2401	1677	1677	0	0	100	1	TPRG1L	3625015	3630127	tumor protein p63 re...	no	no	no	no
ENSG00000116213	7634	2278	2290	12	0	99.476	1	WRAP73	3630767	3652761	WD repeat containing...	no	no	no	no
ENSG00000078900	6767	425	425	0	0	100	1	TP73	3652516	3736201	tumor protein p73 [S...	no	no	no	no
ENSG00000227372	9701	4648	4890	242	4	95.0511	1	TP73-AS1	3735511	3747373	TP73 antisense RNA 1...	no	no	no	no
ENSG00000162592	4238	34	34	0	0	100	1	CCDC27	3746460	3771645	coiled-coil domain c...	no	no	no	no
ENSG00000235169	1087	14	14	0	0	100	1	SMIM1	3772749	3775982	small integral membr...	no	no	no	no
ENSG00000130764	4509	5198	5222	24	0	99.5404	1	LRRC47	3778559	3796498	leucine rich repeat ...	no	no	no	no
ENSG00000266075	297	3	3	0	0	100	1	RN7SL574P	3782815	3783111	RNA, 7SL, cytoplasmi...	no	no	no	no
ENSG00000272153	531	51	51	0	0	100	1		3785008	3785538	novel transcript, an...	no	no	no	no
ENSG00000116198	11885	2082	2082	0	0	100	1	CEP104	3812086	3857396	centrosomal protein ...	no	no	no	no
ENSG00000169598	3870	339	339	0	0	100	1	DFFB	3857267	3885429	DNA fragmentation fa...	no	no	no	no
ENSG00000198912	4388	1792	1838	46	2	97.4973	1	C1orf174	3889125	3900293	chromosome 1 open re...	no	no	no	no
ENSG00000236423	4084	14	14	0	0	100	1	LINC01134	3900347	3917225	long intergenic non-...	no	no	no	no
ENSG00000235054	2574	14	14	0	0	100	1	LINC01777	4412027	4424689	long intergenic non-...	no	no	no	no
ENSG00000196581	12528	60	72	12	16	83.3333	1	AJAP1	4654609	4792534	adherens junctions a...	no	no	no	no
ENSG00000231510	449	5	5	0	0	100	1	LINC02782	5086459	5090899	long intergenic non-...	no	no	no	no
ENSG00000264341	73	6	6	0	0	100	1		5564071	5564143		no	no	no	no
ENSG00000131697	13167	1058	1068	10	0	99.0637	1	NPHP4	5862811	5992473	nephrocystin 4 [Sour...	no	no	no	no
ENSG00000069424	17329	947	987	40	4	95.9473	1	KCNAB2	5990927	6101193	potassium voltage-ga...	no	no	no	no
ENSG00000116254	10094	227	227	0	0	100	1	CHD5	6101787	6180321	chromodomain helicas...	no	no	no	no
ENSG00000116251	4665	4174	8594	4420	51	48.5688	1	RPL22	6185020	6209389	ribosomal protein L2...	no	no	no	no
ENSG00000226944	378	3	3	0	0	100	1	RNF207-AS1	6204840	6205780	RNF207 antisense RNA...	no	no	no	no
ENSG00000158286	6595	323	323	0	0	100	1	RNF207	6205475	6221299	ring finger protein ...	no	no	no	no
ENSG00000116237	4910	8554	8574	20	0	99.7667	1	ICMT	6221193	6235972	isoprenylcysteine ca...	no	no	no	no
ENSG00000225077	2358	147	147	0	0	100	1	ICMT-DT	6234692	6239444	ICMT divergent trans...	no	no	no	no
ENSG00000173673	710	181	185	4	2	97.8378	1	HES3	6244179	6245578	hes family bHLH tran...	no	no	no	no
ENSG00000158292	4198	571	571	0	0	100	1	GPR153	6247353	6261098	G protein-coupled re...	no	no	no	no
ENSG00000097021	4124	7973	7977	4	0	99.9499	1	ACOT7	6264269	6393767	acyl-CoA thioesteras...	no	no	no	no
ENSG00000069812	5407	34	34	0	0	100	1	HES2	6412418	6424670	hes family bHLH tran...	no	no	no	no
ENSG00000187017	6952	715	715	0	0	100	1	ESPN	6424776	6461367	espin [Source:HGNC S...	no	no	no	no
ENSG00000231868	351	4	4	0	0	100	1		6443034	6447006	novel transcript, an...	no	no	no	no
ENSG00000215788	4263	644	644	0	0	100	1	TNFRSF25	6460786	6466175	TNF receptor superfa...	no	no	no	no
ENSG00000171680	6935	2165	2165	0	0	100	1	PLEKHG5	6467122	6520074	pleckstrin homology ...	no	no	no	no
ENSG00000162408	7271	1630	1646	16	0	99.0279	1	NOL9	6521347	6554513	nucleolar protein 9 ...	no	no	no	no
ENSG00000229519	401	8	8	0	0	100	1		6547905	6548619	ribosomal protein L3...	no	no	no	no
ENSG00000173662	2764	4	4	0	0	100	1	TAS1R1	6555307	6579755	taste 1 receptor mem...	no	no	no	no
ENSG00000204859	4510	1035	1035	0	0	100	1	ZBTB48	6579994	6589280	zinc finger and BTB ...	no	no	no	no
ENSG00000162413	6901	2308	2308	0	0	100	1	KLHL21	6590724	6614607	kelch like family me...	no	no	no	no
ENSG00000116273	3632	3616	3632	16	0	99.5595	1	PHF13	6613731	6624030	PHD finger protein 1...	no	no	no	no
ENSG00000041988	4072	619	619	0	0	100	1	THAP3	6624868	6635586	THAP domain containi...	no	no	no	no
ENSG00000007923	5083	4420	4439	19	0	99.572	1	DNAJC11	6634168	6701924	DnaJ heat shock prot...	no	no	no	no
ENSG00000237436	415	29	29	0	0	100	1	CAMTA1-DT	6783892	6784843	CAMTA1 divergent tra...	no	no	no	no
ENSG00000171735	9903	2281	2321	40	1	98.2766	1	CAMTA1	6785454	7769706	calmodulin binding t...	no	no	no	no
ENSG00000270171	1721	48	48	0	0	100	1		7693124	7694844	novel transcript	no	no	no	no
ENSG00000270035	570	18	18	0	0	100	1		7698303	7698872	novel transcript	no	no	no	no
ENSG00000269978	267	16	16	0	0	100	1		7700704	7700970	novel transcript	no	no	no	no
ENSG00000049245	2733	2871	2871	0	0	100	1	VAMP3	7771296	7781432	vesicle associated m...	no	no	no	no
ENSG00000269925	393	45	45	0	0	100	1		7776383	7776775	novel transcript, se...	no	no	no	no
ENSG00000049246	8099	744	744	0	0	100	1	PER3	7784291	7845177	period circadian reg...	no	no	no	no
ENSG00000236266	830	17	17	0	0	100	1		7810242	7827342	novel transcript	no	no	no	no
ENSG00000049247	1793	16	16	0	0	100	1	UTS2	7843083	7853512	urotensin 2 [Source:...	no	no	no	no
ENSG00000116288	2397	8601	8613	12	0	99.8607	1	PARK7	7954291	7985505	Parkinsonism associa...	no	no	no	no
ENSG00000200344	103	4	4	0	0	100	1		7982881	7982983	Y RNA [Source:RFAM;A...	no	no	no	no
ENSG00000284747	4116	30	30	0	0	100	1		7991134	8005312	novel transcript, an...	no	no	no	no
ENSG00000284716	1043	2	2	0	0	100	1		7998187	7999934	novel transcript	no	no	no	no
ENSG00000116285	4179	4767	4787	20	0	99.5822	1	ERRFI1	8004404	8026309	ERBB receptor feedba...	no	no	no	no
ENSG00000232848	800	2	2	0	0	100	1	RPL7AP18	8057245	8058463	ribosomal protein L7...	no	no	no	no
ENSG00000227634	1001	2	2	0	0	100	1	LINC01714	8201518	8215210	long intergenic non-...	no	no	no	no
ENSG00000233645	477	2	2	0	0	100	1		8218190	8220529	novel transcript	no	no	no	no
ENSG00000162426	2888	171	171	0	0	100	1	SLC45A1	8318114	8344167	solute carrier famil...	no	no	no	no
ENSG00000252254	113	2	2	0	0	100	1		8328067	8328179	Y RNA [Source:RFAM;A...	no	no	no	no
ENSG00000142599	14112	13876	13908	32	0	99.7699	1	RERE	8352397	8848921	arginine-glutamic ac...	no	no	no	no
ENSG00000232912	1178	10	10	0	0	100	1	RERE-AS1	8424645	8435013	RERE antisense RNA 1...	no	no	no	no
ENSG00000074800	5216	144399	144459	60	0	99.9585	1	ENO1	8861000	8879190	enolase 1 [Source:HG...	no	no	no	no
ENSG00000142583	6632	20	20	0	0	100	1	SLC2A5	9035106	9088478	solute carrier famil...	no	no	no	no
ENSG00000252404	184	10	10	0	0	100	1		9082696	9082879		no	no	no	no
ENSG00000180758	5304	435	455	20	4	95.6044	1	GPR157	9100305	9129102	G protein-coupled re...	no	no	no	no
ENSG00000228526	8702	1857	1869	12	0	99.3579	1	MIR34AHG	9148011	9198906	MIR34A host gene [So...	no	no	no	no
ENSG00000234546	2141	248	248	0	0	100	1	LNCTAM34A	9182004	9196284	long non coding tran...	no	no	no	no
ENSG00000049239	9322	3289	3301	12	0	99.6365	1	H6PD	9234774	9271337	hexose-6-phosphate d...	no	no	no	no
ENSG00000171621	3389	264	264	0	0	100	1	SPSB1	9292894	9369532	splA/ryanodine recep...	no	no	no	no
ENSG00000284693	2623	2	2	0	0	100	1	LINC02606	9425094	9440564	long intergenic non-...	no	no	no	no
ENSG00000171612	3865	1615	1659	44	2	97.3478	1	SLC25A33	9539465	9585173	solute carrier famil...	no	no	no	no
ENSG00000231181	559	16	16	0	0	100	1		9576427	9576985	ribosomal protein L9...	no	no	no	no
ENSG00000188807	6981	1932	1940	8	0	99.5876	1	TMEM201	9588911	9614877	transmembrane protei...	no	no	no	no
ENSG00000171608	6333	2176	2180	4	0	99.8165	1	PIK3CD	9629889	9729114	phosphatidylinositol...	no	no	no	no
ENSG00000231789	939	298	298	0	0	100	1	PIK3CD-AS2	9672405	9687583	PIK3CD antisense RNA...	no	no	no	no
ENSG00000171603	5241	13428	13460	32	0	99.7623	1	CLSTN1	9728926	9823984	calsyntenin 1 [Sourc...	no	no	no	no
ENSG00000178585	3339	2324	2344	20	0	99.1468	1	CTNNBIP1	9848276	9910336	catenin beta interac...	no	no	no	no
ENSG00000285701	762	22	22	0	0	100	1		9900614	9908034	novel transcript, an...	no	no	no	no
ENSG00000162441	5459	1587	1623	36	2	97.7819	1	LZIC	9922113	9943407	leucine zipper and C...	no	no	no	no
ENSG00000228150	440	19	19	0	0	100	1		9942923	9949974	novel transcript	no	no	no	no
ENSG00000173614	4610	195	199	4	2	97.9899	1	NMNAT1	9943428	9985501	nicotinamide nucleot...	no	no	no	no
ENSG00000202415	319	5	5	0	0	100	1	RN7SKP269	9947318	9947636	RN7SK pseudogene 269...	no	no	no	no
ENSG00000162444	862	66	66	0	0	100	1	RBP7	9997206	10016021	retinol binding prot...	no	no	no	no
ENSG00000130939	9237	9506	9570	64	0	99.3312	1	UBE4B	10032832	10181239	ubiquitination facto...	no	no	no	no
ENSG00000201746	107	4	4	0	0	100	1	RNU6-828P	10163268	10163374	RNA, U6 small nuclea...	no	no	no	no
ENSG00000054523	17955	15766	15868	102	0	99.3572	1	KIF1B	10210570	10381603	kinesin family membe...	no	no	no	no
ENSG00000284735	2381	61	61	0	0	100	1		10381906	10387150	novel transcript	no	no	no	no
ENSG00000284642	1477	57	57	0	0	100	1		10395416	10397432	novel transcript	no	no	no	no
ENSG00000142657	3333	20128	20152	24	0	99.8809	1	PGD	10398592	10420511	phosphogluconate deh...	no	no	no	no
ENSG00000251503	2244	3	3	0	0	100	1	CENPS-CORT	10430102	10452153	CENPS-CORT readthrou...	no	no	no	no
ENSG00000175279	1748	12	12	0	0	100	1	CENPS	10430433	10442808	centromere protein S...	no	no	no	no
ENSG00000241563	914	7	7	0	0	100	1	CORT	10450031	10451998	cortistatin [Source:...	no	no	no	no
ENSG00000160049	6625	6553	6603	50	0	99.2428	1	DFFA	10456522	10472529	DNA fragmentation fa...	no	no	no	no
ENSG00000142655	2932	1622	1622	0	0	100	1	PEX14	10472288	10630758	peroxisomal biogenes...	no	no	no	no
ENSG00000130940	11336	536	536	0	0	100	1	CASZ1	10636604	10796650	castor zinc finger 1...	no	no	no	no
ENSG00000272078	7923	90	90	0	0	100	1		10639241	10654333	novel transcript, an...	no	no	no	no
ENSG00000175262	3573	22	22	0	0	100	1	C1orf127	10946471	10982076	chromosome 1 open re...	no	no	no	no
ENSG00000120948	5317	8446	8476	30	0	99.6461	1	TARDBP	11012344	11030528	TAR DNA binding prot...	no	no	no	no
ENSG00000009724	4257	226	226	0	0	100	1	MASP2	11022009	11047239	MBL associated serin...	no	no	no	no
ENSG00000271895	870	74	74	0	0	100	1	AL109811.2	11029659	11030528	lncRNA	no	no	no	no
ENSG00000116649	1894	7902	7930	28	0	99.6469	1	SRM	11054584	11060020	spermidine synthase ...	no	no	no	no
ENSG00000171824	5991	4254	4263	9	0	99.7889	1	EXOSC10	11066618	11099869	exosome component 10...	no	no	no	no
ENSG00000226849	2682	21	21	0	0	100	1		11068471	11073097	novel transcript	no	no	no	no
ENSG00000230337	536	1	1	0	0	100	1	EXOSC10-AS1	11099430	11102105	EXOSC10 antisense RN...	no	no	no	no
ENSG00000198793	12163	9350	9430	80	0	99.1516	1	MTOR	11106535	11262556	mechanistic target o...	no	no	no	no
ENSG00000171819	2224	4	4	0	0	100	1	ANGPTL7	11189355	11195981	angiopoietin like 7 ...	no	no	no	no
ENSG00000120942	5090	1537	1537	0	0	100	1	UBIAD1	11273198	11296049	UbiA prenyltransfera...	no	no	no	no
ENSG00000284646	742	8	8	0	0	100	1		11311734	11319093	novel transcript	no	no	no	no
ENSG00000204624	6120	415	415	0	0	100	1	DISP3	11479155	11537551	dispatched RND trans...	no	no	no	no
ENSG00000285833	1051	1	1	0	0	100	1		11500803	11502016	novel transcript, an...	no	no	no	no
ENSG00000235643	1351	9	9	0	0	100	1	LINC01647	11609468	11613358	long intergenic non-...	no	no	no	no
ENSG00000284708	2094	11	11	0	0	100	1		11623558	11643416	novel transcript	no	no	no	no
ENSG00000116661	3163	2196	2244	48	2	97.861	1	FBXO2	11637018	11655785	F-box protein 2 [Sou...	no	no	no	no
ENSG00000132879	3527	2037	2037	0	0	100	1	FBXO44	11654375	11663327	F-box protein 44 [So...	no	no	no	no
ENSG00000116663	1735	97	97	0	0	100	1	FBXO6	11664200	11674354	F-box protein 6 [Sou...	no	no	no	no
ENSG00000116670	3324	7657	7857	200	2	97.4545	1	MAD2L2	11658918	11691811	mitotic arrest defic...	no	no	no	no
ENSG00000162490	7365	1825	1825	0	0	100	1	DRAXIN	11691710	11725857	dorsal inhibitory ax...	no	no	no	no
ENSG00000177674	2435	2560	2560	0	0	100	1	AGTRAP	11736084	11754802	angiotensin II recep...	no	no	no	no
ENSG00000215910	6499	113	113	0	0	100	1	C1orf167	11761787	11789585	chromosome 1 open re...	no	no	no	no
ENSG00000177000	11513	920	928	8	0	99.1379	1	MTHFR	11785723	11806455	methylenetetrahydrof...	no	no	no	no
ENSG00000011021	8173	2814	2828	14	0	99.505	1	CLCN6	11806096	11848079	chloride voltage-gat...	no	no	no	no
ENSG00000120937	708	42	42	0	0	100	1	NPPB	11857464	11858945	natriuretic peptide ...	no	no	no	no
ENSG00000285646	3071	6	6	0	0	100	1		11907940	11914298	novel transcript	no	no	no	no
ENSG00000116685	3281	3210	3216	6	0	99.8134	1	KIAA2013	11919591	11926428	KIAA2013 [Source:HGN...	no	no	no	no
ENSG00000083444	5320	3790	3794	4	0	99.8946	1	PLOD1	11934205	11975538	procollagen-lysine,2...	no	no	no	no
ENSG00000116688	10234	5530	5554	24	0	99.5679	1	MFN2	11980181	12015211	mitofusin 2 [Source:...	no	no	no	no
ENSG00000116691	2821	2390	2406	16	0	99.335	1	MIIP	12019466	12032045	migration and invasi...	no	no	no	no
ENSG00000202461	113	24	24	0	0	100	1		12024012	12024124	Y RNA [Source:RFAM;A...	no	no	no	no
ENSG00000120949	3812	1242	1242	0	0	100	1	TNFRSF8	12063303	12144207	TNF receptor superfa...	no	no	no	no
ENSG00000028137	3778	274	274	0	0	100	1	TNFRSF1B	12166991	12209228	TNF receptor superfa...	no	no	no	no
ENSG00000048707	20768	5479	5535	56	1	98.9883	1	VPS13D	12230030	12512047	vacuolar protein sor...	no	no	no	no
ENSG00000239149	152	15	15	0	0	100	1	SNORA59A	12507246	12507397	small nucleolar RNA,...	no	no	no	no
ENSG00000162496	3515	450	450	0	0	100	1	DHRS3	12567910	12618210	dehydrogenase/reduct...	no	no	no	no
ENSG00000221340	101	8	8	0	0	100	1	RNU6ATAC18P	12569972	12570072	RNA, U6atac small nu...	no	no	no	no
ENSG00000272482	345	4	4	0	0	100	1		12618900	12619980	novel transcript	no	no	no	no
ENSG00000188984	4055	43	43	0	0	100	1	AADACL3	12716110	12728760	arylacetamide deacet...	no	no	no	no
ENSG00000162493	3707	4293	4325	32	0	99.2601	1	PDPN	13583465	13617957	podoplanin [Source:H...	no	no	no	no
ENSG00000222952	101	2	2	0	0	100	1	RNA5SP41	13623184	13623284	RNA, 5S ribosomal ps...	no	no	no	no
ENSG00000237445	379	12	12	0	0	100	1		13657311	13659910	novel transcript	no	no	no	no
ENSG00000116731	10923	2960	2976	16	0	99.4624	1	PRDM2	13700188	13825079	PR/SET domain 2 [Sou...	no	no	no	no
ENSG00000189337	13860	1368	1388	20	1	98.5591	1	KAZN	13892792	15118043	kazrin, periplakin i...	no	no	no	no
ENSG00000175147	11973	120	120	0	0	100	1	TMEM51-AS1	15111815	15153618	TMEM51 antisense RNA...	no	no	no	no
ENSG00000171729	2238	543	543	0	0	100	1	TMEM51	15152532	15220478	transmembrane protei...	no	no	no	no
ENSG00000142621	12805	74	74	0	0	100	1	FHAD1	15236521	15400283	forkhead associated ...	no	no	no	no
ENSG00000233485	3105	12	12	0	0	100	1	FHAD1-AS1	15326680	15343876	FHAD1 antisense RNA ...	no	no	no	no
ENSG00000236045	727	4	4	0	0	100	1		15334166	15335464	novel transcript	no	no	no	no
ENSG00000228140	5178	5	5	0	0	100	1	EFHD2-AS1	15402979	15409433	EFHD2 antisense RNA ...	no	no	no	no
ENSG00000142634	2534	1669	1669	0	0	100	1	EFHD2	15409888	15430339	EF-hand domain famil...	no	no	no	no
ENSG00000142615	1519	12	12	0	0	100	1	CELA2A	15456728	15472091	chymotrypsin like el...	no	no	no	no
ENSG00000215704	1449	7	7	0	0	100	1	CELA2B	15465909	15491395	chymotrypsin like el...	no	no	no	no
ENSG00000132906	5269	784	788	4	0	99.4924	1	CASP9	15490832	15526534	caspase 9 [Source:HG...	no	no	no	no
ENSG00000116138	8563	999	1007	8	0	99.2056	1	DNAJC16	15526813	15592379	DnaJ heat shock prot...	no	no	no	no
ENSG00000116771	3095	242	242	0	0	100	1	AGMAT	15571699	15585051	agmatinase [Source:H...	no	no	no	no
ENSG00000237301	2845	38	38	0	0	100	1		15586136	15603626	novel transcript	no	no	no	no
ENSG00000235084	447	10	10	0	0	100	1	CHCHD2P6	15604597	15605043	coiled-coil-helix-co...	no	no	no	no
ENSG00000197312	12178	5603	5669	66	1	98.8358	1	DDI2	15617458	15669044	DNA damage inducible...	no	no	no	no
ENSG00000116786	4134	4748	4818	70	1	98.5471	1	PLEKHM2	15684320	15734769	pleckstrin homology ...	no	no	no	no
ENSG00000237938	1533	50	54	4	7	92.5926	1		15720312	15736896	novel transcript, an...	no	no	no	no
ENSG00000162461	3338	94	94	0	0	100	1	SLC25A34	15736258	15741392	solute carrier famil...	no	no	no	no
ENSG00000162460	1443	25	25	0	0	100	1	TMEM82	15742499	15747982	transmembrane protei...	no	no	no	no
ENSG00000162458	4351	6465	6549	84	1	98.7174	1	FBLIM1	15756607	15786594	filamin binding LIM ...	no	no	no	no
ENSG00000233954	2180	102	104	2	1	98.0769	1	UQCRHL	15807169	15809348	ubiquinol-cytochrome...	no	no	no	no
ENSG00000179743	2473	306	306	0	0	100	1	SPEN-AS1	15834474	15848147	SPEN antisense RNA 1...	no	no	no	no
ENSG00000065526	14336	8578	8610	32	0	99.6283	1	SPEN	15836095	15940456	spen family transcri...	no	no	no	no
ENSG00000116809	4240	1406	1406	0	0	100	1	ZBTB17	15941869	15976132	zinc finger and BTB ...	no	no	no	no
ENSG00000173641	3910	76	76	0	0	100	1	HSPB7	16014028	16019594	heat shock protein f...	no	no	no	no
ENSG00000186510	3476	83	89	6	6	93.2584	1	CLCNKA	16018875	16034050	chloride voltage-gat...	no	no	no	no
ENSG00000232456	704	6	10	4	40	60	1	FAM131C2P	16035178	16040029	family with sequence...	no	no	no	no
ENSG00000184908	2939	219	225	6	2	97.3333	1	CLCNKB	16040252	16057311	chloride voltage-gat...	no	no	no	no
ENSG00000185519	1720	122	150	28	18	81.3333	1	FAM131C	16057769	16073651	family with sequence...	no	no	no	no
ENSG00000142627	4141	5178	5218	40	0	99.2334	1	EPHA2	16124337	16156069	EPH receptor A2 [Sou...	no	no	no	no
ENSG00000227959	904	12	12	0	0	100	1	EPHA2-AS1	16155176	16158148	EPHA2 antisense RNA ...	no	no	no	no
ENSG00000224621	544	6	6	0	0	100	1		16159266	16161883	novel transcript	no	no	no	no
ENSG00000142632	3788	4854	4854	0	0	100	1	ARHGEF19	16197854	16212652	Rho guanine nucleoti...	no	no	no	no
ENSG00000237276	1990	15	15	0	0	100	1	ANO7L1	16216469	16228027	anoctamin 7 like 1 (...	no	no	no	no
ENSG00000288398	2662	78	78	0	0	100	1		16228674	16231335	novel transcript	no	no	no	no
ENSG00000132881	1574	79	79	0	0	100	1	CPLANE2	16231692	16237183	ciliogenesis and pla...	no	no	no	no
ENSG00000233929	186	44	44	0	0	100	1	MT1XP1	16241213	16241398	metallothionein 1X p...	no	no	no	no
ENSG00000037637	9009	1471	1479	8	0	99.4591	1	FBXO42	16246840	16352480	F-box protein 42 [So...	no	no	no	no
ENSG00000055070	4742	5301	5325	24	0	99.5493	1	SZRD1	16352575	16398145	SUZ RNA binding doma...	no	no	no	no
ENSG00000187144	4506	4	4	0	0	100	1	SPATA21	16387117	16437424	spermatogenesis asso...	no	no	no	no
ENSG00000157191	5510	1495	1511	16	1	98.9411	1	NECAP2	16440721	16460078	NECAP endocytosis as...	no	no	no	no
ENSG00000226029	3245	90	90	0	0	100	1	LINC01772	16460948	16468481	long intergenic non-...	no	no	no	no
ENSG00000080947	6905	672	688	16	2	97.6744	1	CROCCP3	16474396	16491307	CROCC pseudogene 3 [...	no	no	no	no
ENSG00000233421	2068	46	54	8	14	85.1852	1	LINC01783	16533886	16535649	long intergenic non-...	no	no	no	no
ENSG00000219481	12212	909	2176	1267	58	41.7739	1	NBPF1	16562319	16613562	NBPF member 1 [Sourc...	no	no	no	no
ENSG00000215908	5606	2352	2395	43	1	98.2046	1	CROCCP2	16618969	16657232	CROCC pseudogene 2 [...	no	no	no	no
ENSG00000186301	2291	190	248	58	23	76.6129	1	MST1P2	16645622	16650289	macrophage stimulati...	no	no	no	no
ENSG00000280114	1351	6	96	90	93	6.25	1		16681097	16688749	phosphodiesterase 4D...	no	no	no	no
ENSG00000236698	435	21	189	168	88	11.1111	1	EIF1AXP1	16685621	16686055	EIF1AX pseudogene 1 ...	no	no	no	no
ENSG00000268869	4903	144	214	70	32	67.2897	1	ESPNP	16692280	16720157	espin pseudogene [So...	no	no	no	no
ENSG00000279151	406	2	2	0	0	100	1		16701546	16705594	novel transcript	no	no	no	no
ENSG00000058453	8875	7255	7575	320	4	95.7756	1	CROCC	16740273	16972964	ciliary rootlet coil...	no	no	no	no
ENSG00000186715	5298	210	307	97	31	68.4039	1	MST1L	16757232	16764480	macrophage stimulati...	no	no	no	no
ENSG00000223643	837	3	9	6	66	33.3333	1		16851257	16853129	novel transcript	no	no	no	no
ENSG00000228549	3293	86	108	22	20	79.6296	1		16870945	16883659	novel transcript	no	no	no	no
ENSG00000238142	2130	155	157	2	1	98.7261	1		16887577	16889725	novel transcript	no	no	no	no
ENSG00000272426	438	8	8	0	0	100	1		16904339	16904776	novel transcript	no	no	no	no
ENSG00000117122	2712	3700	4406	706	16	83.9764	1	MFAP2	16974502	16980632	microfibril associat...	no	no	no	no
ENSG00000286898	385	14	14	0	0	100	1		16976302	16977792	novel transcript, an...	no	no	no	no
ENSG00000159363	5253	5135	5149	14	0	99.7281	1	ATP13A2	16985958	17011928	ATPase cation transp...	no	no	no	no
ENSG00000117118	2324	2833	2849	16	0	99.4384	1	SDHB	17018722	17054032	succinate dehydrogen...	no	no	no	no
ENSG00000117115	6000	700	700	0	0	100	1	PADI2	17066761	17119451	peptidyl arginine de...	no	no	no	no
ENSG00000142623	4903	80	80	0	0	100	1	PADI1	17205128	17246007	peptidyl arginine de...	no	no	no	no
ENSG00000142619	3189	223	223	0	0	100	1	PADI3	17249098	17284233	peptidyl arginine de...	no	no	no	no
ENSG00000266634	87	1	1	0	0	100	1	MIR3972	17277889	17277975	microRNA 3972 [Sourc...	no	no	no	no
ENSG00000159339	2971	16	16	0	0	100	1	PADI4	17308195	17364004	peptidyl arginine de...	no	no	no	no
ENSG00000276747	2396	5	5	0	0	100	1	PADI6	17372196	17401699	peptidyl arginine de...	no	no	no	no
ENSG00000179051	4079	30101	30559	458	1	98.5013	1	RCC2	17406760	17439677	regulator of chromos...	no	no	no	no
ENSG00000074964	7954	2752	2764	12	0	99.5658	1	ARHGEF10L	17539698	17697874	Rho guanine nucleoti...	no	no	no	no
ENSG00000117148	1844	42	42	0	0	100	1	ACTL8	17755333	17827063	actin like 8 [Source...	no	no	no	no
ENSG00000117154	3033	2395	2399	4	0	99.8333	1	IGSF21	18107798	18378483	immunoglobin superfa...	no	no	no	no
ENSG00000280222	6473	2	2	0	0	100	1		18109389	18115861	TEC	no	no	no	no
ENSG00000230035	430	14	14	0	0	100	1	IGSF21-AS1	18166929	18179346	IGSF21 antisense RNA...	no	no	no	no
ENSG00000179023	5145	1810	1810	0	0	100	1	KLHDC7A	18480930	18485974	kelch domain contain...	no	no	no	no
ENSG00000009709	6473	16	16	0	0	100	1	PAX7	18630846	18748866	paired box 7 [Source...	no	no	no	no
ENSG00000159423	3632	2228	2230	2	0	99.9103	1	ALDH4A1	18871430	18902724	aldehyde dehydrogena...	no	no	no	no
ENSG00000169991	6179	2146	2154	8	0	99.6286	1	IFFO2	18904280	18956676	intermediate filamen...	no	no	no	no
ENSG00000272084	3402	1	1	0	0	100	1		19072110	19075511	novel transcript	no	no	no	no
ENSG00000127481	24661	35579	35787	208	0	99.4188	1	UBR4	19074510	19210266	ubiquitin protein li...	no	no	no	no
ENSG00000230424	507	7	7	0	0	100	1	EMC1-AS1	19210348	19240709	EMC1 antisense RNA 1...	no	no	no	no
ENSG00000127463	9602	5141	5169	28	0	99.4583	1	EMC1	19215660	19251552	ER membrane protein ...	no	no	no	no
ENSG00000053372	2556	3449	3509	60	1	98.2901	1	MRTO4	19251805	19260128	MRT4 homolog, riboso...	no	no	no	no
ENSG00000286064	339	17	17	0	0	100	1		19260521	19262307	aldo-keto reductase ...	no	no	no	no
ENSG00000211454	2768	33	39	6	15	84.6154	1	AKR7L	19265982	19274194	aldo-keto reductase ...	no	no	no	no
ENSG00000162482	1215	45	78	33	42	57.6923	1	AKR7A3	19282573	19288770	aldo-keto reductase ...	no	no	no	no
ENSG00000270728	525	128	128	0	0	100	1		19297080	19297903	synaptonemal complex...	no	no	no	no
ENSG00000053371	1781	1493	1517	24	1	98.4179	1	AKR7A2	19303965	19312144	aldo-keto reductase ...	no	no	no	no
ENSG00000200403	107	2	2	0	0	100	1	RNU6-1099P	19305076	19305182	RNA, U6 small nuclea...	no	no	no	no
ENSG00000040487	2686	713	717	4	0	99.4421	1	SLC66A1	19312326	19329300	solute carrier famil...	no	no	no	no
ENSG00000077549	19094	18474	18819	345	1	98.1667	1	CAPZB	19338775	19485539	capping actin protei...	no	no	no	no
ENSG00000173436	5480	152	152	0	0	100	1	MICOS10	19484403	19629821	mitochondrial contac...	no	no	no	no
ENSG00000158747	3448	299	301	2	0	99.3355	1	NBL1	19596979	19658456	NBL1, DAN family BMP...	no	no	no	no
ENSG00000226396	455	31	31	0	0	100	1		19608114	19608568	ribosomal protein S1...	no	no	no	no
ENSG00000158748	3800	62	62	0	0	100	1	HTR6	19664875	19680966	5-hydroxytryptamine ...	no	no	no	no
ENSG00000162542	4054	458	466	8	1	98.2833	1	TMCO4	19682240	19799945	transmembrane and co...	no	no	no	no
ENSG00000169914	6885	3689	3697	8	0	99.7836	1	OTUD3	19882395	19912945	OTU deubiquitinase 3...	no	no	no	no
ENSG00000188257	1685	4	4	0	0	100	1	PLA2G2A	19975431	19980416	phospholipase A2 gro...	no	no	no	no
ENSG00000127472	3342	1	1	0	0	100	1	PLA2G5	20028179	20091911	phospholipase A2 gro...	no	no	no	no
ENSG00000162543	5562	76	76	0	0	100	1	UBXN10	20186096	20196050	UBX domain protein 1...	no	no	no	no
ENSG00000158816	6377	130	130	0	0	100	1	VWA5B1	20290875	20359518	von Willebrand facto...	no	no	no	no
ENSG00000226664	229	2	2	0	0	100	1		20294211	20323187	novel transcript	no	no	no	no
ENSG00000162545	2605	522	526	4	0	99.2395	1	CAMK2N1	20482391	20486210	calcium/calmodulin d...	no	no	no	no
ENSG00000090432	2428	1080	1084	4	0	99.631	1	MUL1	20499448	20508151	mitochondrial E3 ubi...	no	no	no	no
ENSG00000183114	2448	162	162	0	0	100	1	FAM43B	20552573	20555020	family with sequence...	no	no	no	no
ENSG00000158825	820	217	217	0	0	100	1	CDA	20589086	20618903	cytidine deaminase [...	no	no	no	no
ENSG00000158828	4833	433	433	0	0	100	1	PINK1	20633458	20651511	PTEN induced kinase ...	no	no	no	no
ENSG00000117242	4443	53	71	18	25	74.6479	1	PINK1-AS	20642657	20652193	PINK1 antisense RNA ...	no	no	no	no
ENSG00000244038	2721	11648	11690	42	0	99.6407	1	DDOST	20651767	20661544	dolichyl-diphosphool...	no	no	no	no
ENSG00000117245	4470	1279	1283	4	0	99.6882	1	KIF17	20664014	20718017	kinesin family membe...	no	no	no	no
ENSG00000235432	479	4	4	0	0	100	1		20692734	20694013	nucleolar protein 5A...	no	no	no	no
ENSG00000189410	4487	894	894	0	0	100	1	SH2D5	20719731	20732837	SH2 domain containin...	no	no	no	no
ENSG00000127483	9815	10259	10323	64	0	99.38	1	HP1BP3	20740266	20787323	heterochromatin prot...	no	no	no	no
ENSG00000075151	9596	10492	10552	60	0	99.4314	1	EIF4G3	20806292	21177285	eukaryotic translati...	no	no	no	no
ENSG00000235112	296	4	4	0	0	100	1	HSPE1P27	21161475	21162081	heat shock protein f...	no	no	no	no
ENSG00000287192	1111	2	2	0	0	100	1		21177054	21178164	novel transcript	no	no	no	no
ENSG00000117298	7308	5226	5234	8	0	99.8472	1	ECE1	21217247	21345572	endothelin convertin...	no	no	no	no
ENSG00000236936	723	6	6	0	0	100	1		21266082	21267251	novel transcript	no	no	no	no
ENSG00000231105	2579	27	27	0	0	100	1	ECE1-AS1	21293290	21299874	ECE1 antisense RNA 1...	no	no	no	no
ENSG00000227001	661	24	31	7	22	77.4194	1	NBPF2P	21424625	21427967	NBPF member 2, pseud...	no	no	no	no
ENSG00000187952	1234	43	539	496	92	7.97774	1	HS6ST1P1	21428303	21429536	heparan sulfate 6-O-...	no	no	no	no
ENSG00000186543	830	30	30	0	0	100	1	CROCCP5	21434318	21437558	CROCC pseudogene 5 [...	no	no	no	no
ENSG00000142794	6812	1404	1486	82	5	94.4818	1	NBPF3	21440128	21485005	NBPF member 3 [Sourc...	no	no	no	no
ENSG00000162551	2980	11954	12098	144	1	98.8097	1	ALPL	21509397	21578410	alkaline phosphatase...	no	no	no	no
ENSG00000233431	821	6	6	0	0	100	1	LINC02596	21586472	21591187	long intergenic non-...	no	no	no	no
ENSG00000076864	5755	1314	1318	4	0	99.6965	1	RAP1GAP	21596221	21669357	RAP1 GTPase activati...	no	no	no	no
ENSG00000090686	9497	8013	8017	4	0	99.9501	1	USP48	21678298	21783606	ubiquitin specific p...	no	no	no	no
ENSG00000187942	4494	8	8	0	0	100	1	LDLRAD2	21812265	21825225	low density lipoprot...	no	no	no	no
ENSG00000142798	18118	23852	24000	148	0	99.3833	1	HSPG2	21822244	21937310	heparan sulfate prot...	no	no	no	no
ENSG00000218510	3764	289	298	9	3	96.9799	1	LINC00339	22024558	22031223	long intergenic non-...	no	no	no	no
ENSG00000070831	16278	11168	11290	122	1	98.9194	1	CDC42	22052627	22101360	cell division cycle ...	no	no	no	no
ENSG00000285752	2574	106	107	1	0	99.0654	1	CDC42-AS1	22028317	22052927	CDC42 antisense RNA ...	no	no	no	no
ENSG00000271428	488	2	2	0	0	100	1	MPHOSPH6P1	22068340	22068827	MPHOSPH6 pseudogene ...	no	no	no	no
ENSG00000162552	4650	18	30	12	40	60	1	WNT4	22117313	22143969	Wnt family member 4 ...	no	no	no	no
ENSG00000184677	9169	2244	2244	0	0	100	1	ZBTB40	22428838	22531157	zinc finger and BTB ...	no	no	no	no
ENSG00000237200	273	36	36	0	0	100	1	ZBTB40-IT1	22517474	22519708	ZBTB40 intronic tran...	no	no	no	no
ENSG00000070886	5434	370	370	0	0	100	1	EPHA8	22563489	22603595	EPH receptor A8 [Sou...	no	no	no	no
ENSG00000133216	12516	1439	1439	0	0	100	1	EPHB2	22710839	22921500	EPH receptor B2 [Sou...	no	no	no	no
ENSG00000227868	660	10	12	2	16	83.3333	1	TEX46	23010834	23019100	testis expressed 46 ...	no	no	no	no
ENSG00000004487	5440	25221	25305	84	0	99.668	1	KDM1A	23019443	23083689	lysine demethylase 1...	no	no	no	no
ENSG00000169641	9658	7301	7315	14	0	99.8086	1	LUZP1	23084030	23177808	leucine zipper prote...	no	no	no	no
ENSG00000179546	2835	14	14	0	0	100	1	HTR1D	23191895	23217502	5-hydroxytryptamine ...	no	no	no	no
ENSG00000261326	6182	609	609	0	0	100	1	LINC01355	23281307	23287488	long intergenic non-...	no	no	no	no
ENSG00000284726	604	15	15	0	0	100	1		23297797	23302866	novel transcript	no	no	no	no
ENSG00000125944	8704	14197	14251	54	0	99.6211	1	HNRNPR	23303771	23344336	heterogeneous nuclea...	no	no	no	no
ENSG00000125945	4786	234	234	0	0	100	1	ZNF436	23359448	23369836	zinc finger protein ...	no	no	no	no
ENSG00000249087	2674	97	97	0	0	100	1	ZNF436-AS1	23368939	23371839	ZNF436 antisense RNA...	no	no	no	no
ENSG00000204219	3675	11	11	0	0	100	1	TCEA3	23380909	23424748	transcription elonga...	no	no	no	no
ENSG00000088280	4988	5306	5322	16	0	99.6994	1	ASAP3	23428563	23484568	ArfGAP with SH3 doma...	no	no	no	no
ENSG00000007968	5462	530	534	4	0	99.2509	1	E2F2	23506438	23531233	E2F transcription fa...	no	no	no	no
ENSG00000235052	456	19	19	0	0	100	1		23549139	23550915	novel transcript	no	no	no	no
ENSG00000117318	1496	4357	4357	0	0	100	1	ID3	23557926	23559501	inhibitor of DNA bin...	no	no	no	no
ENSG00000285802	1322	14	14	0	0	100	1		23576436	23593621	novel transcript	no	no	no	no
ENSG00000142676	2659	44551	44587	36	0	99.9193	1	RPL11	23691742	23696835	ribosomal protein L1...	no	no	no	no
ENSG00000236810	3086	88	88	0	0	100	1	ELOA-AS1	23706901	23778325	ELOA antisense RNA 1...	no	no	no	no
ENSG00000011007	5391	4176	4180	4	0	99.9043	1	ELOA	23743448	23762059	elongin A [Source:HG...	no	no	no	no
ENSG00000057757	2173	2694	2694	0	0	100	1	PITHD1	23778418	23788232	PITH domain containi...	no	no	no	no
ENSG00000011009	2021	5814	5878	64	1	98.9112	1	LYPLA2	23791145	23795539	lysophospholipase 2 ...	no	no	no	no
ENSG00000117308	3955	726	734	8	1	98.9101	1	GALE	23795599	23800781	UDP-galactose-4-epim...	no	no	no	no
ENSG00000117305	5628	1142	1146	4	0	99.651	1	HMGCL	23801885	23838620	3-hydroxy-3-methylgl...	no	no	no	no
ENSG00000179163	2043	581	581	0	0	100	1	FUCA1	23845077	23868290	alpha-L-fucosidase 1...	no	no	no	no
ENSG00000189266	2763	9042	9460	418	4	95.5814	1	PNRC2	23956839	23963462	proline rich nuclear...	no	no	no	no
ENSG00000188529	11860	12322	12420	98	0	99.211	1	SRSF10	23964347	23980927	serine and arginine ...	no	no	no	no
ENSG00000142661	9214	44	44	0	0	100	1	MYOM3	24056035	24112135	myomesin 3 [Source:H...	no	no	no	no
ENSG00000142677	2817	53	53	0	0	100	1	IL22RA1	24119771	24143140	interleukin 22 recep...	no	no	no	no
ENSG00000185436	4940	1206	1212	6	0	99.505	1	IFNLR1	24154168	24187959	interferon lambda re...	no	no	no	no
ENSG00000232298	856	1	1	0	0	100	1	GRHL3-AS1	24307556	24321901	GRHL3 antisense RNA ...	no	no	no	no
ENSG00000158055	3905	64	64	0	0	100	1	GRHL3	24199558	24364482	grainyhead like tran...	no	no	no	no
ENSG00000001460	8511	852	852	0	0	100	1	STPG1	24356999	24416934	sperm tail PG-rich r...	no	no	no	no
ENSG00000001461	9396	865	873	8	0	99.0836	1	NIPAL3	24415802	24472976	NIPA like domain con...	no	no	no	no
ENSG00000286061	762	13	13	0	0	100	1	RCAN3AS	24496254	24535400	RCAN3 antisense RNA ...	no	no	no	no
ENSG00000117602	7138	1404	1404	0	0	100	1	RCAN3	24502351	24541040	RCAN family member 3...	no	no	no	no
ENSG00000184454	4146	48	48	0	0	100	1	NCMAP	24556087	24609328	non-compact myelin a...	no	no	no	no
ENSG00000133226	7922	21541	22017	476	2	97.838	1	SRRM1	24631716	24673281	serine and arginine ...	no	no	no	no
ENSG00000169504	4467	29531	29563	32	0	99.8918	1	CLIC4	24745382	24844321	chloride intracellul...	no	no	no	no
ENSG00000020633	4922	78	78	0	0	100	1	RUNX3	24899511	24965121	RUNX family transcri...	no	no	no	no
ENSG00000229162	820	10	10	0	0	100	1	RUNX3-AS1	24961345	24963097	RUNX3 antisense RNA ...	no	no	no	no
ENSG00000117614	3773	2335	2335	0	0	100	1	SYF2	25222276	25232502	SYF2 pre-mRNA splici...	no	no	no	no
ENSG00000284602	2190	40	40	0	0	100	1		25232586	25234775	novel transcript	no	no	no	no
ENSG00000284657	760	4	4	0	0	100	1		25239494	25240253	novel transcript	no	no	no	no
ENSG00000117616	6730	2200	2406	206	8	91.4381	1	RSRP1	25242249	25338213	arginine and serine ...	no	no	no	no
ENSG00000272432	485	18	18	0	0	100	1		25247837	25248321	novel transcript	no	no	no	no
ENSG00000261349	459	21	43	22	51	48.8372	1		25266102	25267136	novel pseudogene	no	no	no	no
ENSG00000187010	3313	43	43	0	0	100	1	RHD	25272393	25330445	Rh blood group D ant...	no	no	no	no
ENSG00000224183	480	14	14	0	0	100	1	SDHDP6	25294164	25294643	succinate dehydrogen...	no	no	no	no
ENSG00000259984	459	8	14	6	42	57.1429	1		25336429	25337465	novel pseudogene	no	no	no	no
ENSG00000183726	3010	3541	3541	0	0	100	1	TMEM50A	25338317	25362361	transmembrane protei...	no	no	no	no
ENSG00000188672	2433	18	18	0	0	100	1	RHCE	25362249	25430192	Rh blood group CcEe ...	no	no	no	no
ENSG00000238084	478	2	2	0	0	100	1		25398721	25399198	succinate dehydrogen...	no	no	no	no
ENSG00000204178	3979	1162	1166	4	0	99.6569	1	MACO1	25430858	25500209	macoilin 1 [Source:H...	no	no	no	no
ENSG00000157978	5371	1229	1233	4	0	99.6756	1	LDLRAP1	25543606	25568886	low density lipoprot...	no	no	no	no
ENSG00000225643	483	24	24	0	0	100	1		25581478	25590356	novel transcript	no	no	no	no
ENSG00000117643	9026	664	664	0	0	100	1	MAN1C1	25616791	25786206	mannosidase alpha cl...	no	no	no	no
ENSG00000233478	2224	4	4	0	0	100	1		25644544	25659111	novel transcript	no	no	no	no
ENSG00000162430	4421	11101	11201	100	0	99.1072	1	SELENON	25800193	25818221	selenoprotein N [Sou...	no	no	no	no
ENSG00000228172	2793	1	1	0	0	100	1		25816749	25820797	novel transcript	no	no	no	no
ENSG00000117640	5797	658	666	8	1	98.7988	1	MTFR1L	25818640	25832942	mitochondrial fissio...	no	no	no	no
ENSG00000127423	2408	1266	1274	8	0	99.3721	1	AUNIP	25831913	25859458	aurora kinase A and ...	no	no	no	no
ENSG00000182749	3244	447	447	0	0	100	1	PAQR7	25861484	25875708	progestin and adipoQ...	no	no	no	no
ENSG00000117632	6247	24886	25227	341	1	98.6483	1	STMN1	25884181	25906991	stathmin 1 [Source:H...	no	no	no	no
ENSG00000223624	140	4	4	0	0	100	1		25888970	25889109	ribosomal protein L3...	no	no	no	no
ENSG00000158006	3795	1065	1081	16	1	98.5199	1	PAFAH2	25959767	25998117	platelet activating ...	no	no	no	no
ENSG00000158008	4542	35	35	0	0	100	1	EXTL1	26019884	26036464	exostosin like glyco...	no	no	no	no
ENSG00000158014	3483	6	6	0	0	100	1	SLC30A2	26037252	26046118	solute carrier famil...	no	no	no	no
ENSG00000175087	4560	300	300	0	0	100	1	PDIK1L	26111165	26125555	PDLIM1 interacting k...	no	no	no	no
ENSG00000197245	2799	66	66	0	0	100	1	FAM110D	26159079	26163962	family with sequence...	no	no	no	no
ENSG00000236782	2073	36	36	0	0	100	1	ZNF593OS	26169516	26171832	ZNF593 opposite stra...	no	no	no	no
ENSG00000142675	3960	1394	1394	0	0	100	1	CNKSR1	26177484	26189884	connector enhancer o...	no	no	no	no
ENSG00000188782	2030	52	52	0	0	100	1	CATSPER4	26190561	26202968	cation channel sperm...	no	no	no	no
ENSG00000236155	3191	146	146	0	0	100	1	ZPLD2P	26209741	26229844	zona pellucida like ...	no	no	no	no
ENSG00000130695	5145	4998	5002	4	0	99.92	1	CEP85	26234200	26278808	centrosomal protein ...	no	no	no	no
ENSG00000270733	358	14	14	0	0	100	1		26263041	26263398	mitochondrial riboso...	no	no	no	no
ENSG00000142669	876	2792	2792	0	0	100	1	SH3BGRL3	26280086	26281522	SH3 domain binding g...	no	no	no	no
ENSG00000158062	4704	496	520	24	4	95.3846	1	UBXN11	26281328	26318363	UBX domain protein 1...	no	no	no	no
ENSG00000169442	934	14	14	0	0	100	1	CD52	26317958	26320523	CD52 molecule [Sourc...	no	no	no	no
ENSG00000176092	6895	1086	1094	8	0	99.2687	1	CRYBG2	26321698	26360080	crystallin beta-gamm...	no	no	no	no
ENSG00000225854	346	15	15	0	0	100	1		26326688	26327033	ribosomal protein L3...	no	no	no	no
ENSG00000131914	3975	80173	80939	766	0	99.0536	1	LIN28A	26410817	26429728	lin-28 homolog A [So...	no	no	no	no
ENSG00000117682	5608	1630	1638	8	0	99.5116	1	DHDDS	26432282	26471306	dehydrodolichyl diph...	no	no	no	no
ENSG00000225891	1261	43	43	0	0	100	1	DHDDS-AS1	26462756	26468014	DHDDS antisense RNA ...	no	no	no	no
ENSG00000198830	3189	17045	20091	3046	15	84.839	1	HMGN2	26472440	26476642	high mobility group ...	no	no	no	no
ENSG00000117676	5884	3766	3838	72	1	98.124	1	RPS6KA1	26529761	26575030	ribosomal protein S6...	no	no	no	no
ENSG00000260063	2000	24	24	0	0	100	1		26692132	26694131	novel transcript, an...	no	no	no	no
ENSG00000117713	15939	13010	13105	95	0	99.2751	1	ARID1A	26693236	26782104	AT-rich interaction ...	no	no	no	no
ENSG00000060642	5872	696	696	0	0	100	1	PIGV	26787054	26800659	phosphatidylinositol...	no	no	no	no
ENSG00000204160	5460	2502	2518	16	0	99.3646	1	ZDHHC18	26826688	26857604	zinc finger DHHC-typ...	no	no	no	no
ENSG00000175793	1308	529	529	0	0	100	1	SFN	26863149	26864456	stratifin [Source:HG...	no	no	no	no
ENSG00000142751	4966	1302	1310	8	0	99.3893	1	GPN2	26876132	26890283	GPN-loop GTPase 2 [S...	no	no	no	no
ENSG00000198746	2226	759	783	24	3	96.9349	1	GPATCH3	26890488	26900467	G-patch domain conta...	no	no	no	no
ENSG00000090273	2848	10128	10240	112	1	98.9062	1	NUDC	26900238	26946871	nuclear distribution...	no	no	no	no
ENSG00000175707	1855	1005	1021	16	1	98.4329	1	KDF1	26949562	26960468	keratinocyte differe...	no	no	no	no
ENSG00000172746	497	4	4	0	0	100	1	RPL12P13	26980165	26980975	ribosomal protein L1...	no	no	no	no
ENSG00000224064	397	1	1	0	0	100	1	RPL32P6	26983628	26984024	ribosomal protein L3...	no	no	no	no
ENSG00000253368	1979	1460	1460	0	0	100	1	TRNP1	26993692	27000886	TMF1 regulated nucle...	no	no	no	no
ENSG00000158246	2382	4329	4361	32	0	99.2662	1	TENT5B	27005020	27012850	terminal nucleotidyl...	no	no	no	no
ENSG00000090020	6195	2094	2106	12	0	99.4302	1	SLC9A1	27098809	27166981	solute carrier famil...	no	no	no	no
ENSG00000229985	527	11	11	0	0	100	1		27176751	27177277	ribosomal protein L1...	no	no	no	no
ENSG00000214973	640	4	4	0	0	100	1	CHCHD3P3	27200834	27201473	coiled-coil-helix-co...	no	no	no	no
ENSG00000225159	867	46	72	26	36	63.8889	1	NPM1P39	27206930	27207796	nucleophosmin 1 pseu...	no	no	no	no
ENSG00000142784	5911	2412	2456	44	1	98.2085	1	WDTC1	27234632	27308636	WD and tetratricopep...	no	no	no	no
ENSG00000252098	104	4	4	0	0	100	1		27255464	27255567	Y RNA [Source:RFAM;A...	no	no	no	no
ENSG00000186501	4476	1066	1070	4	0	99.6262	1	TMEM222	27322145	27336400	transmembrane protei...	no	no	no	no
ENSG00000206888	107	2	2	0	0	100	1	RNU6-48P	27325219	27325325	RNA, U6 small nuclea...	no	no	no	no
ENSG00000241547	468	7	7	0	0	100	1	ACTG1P20	27325329	27325796	actin gamma 1 pseudo...	no	no	no	no
ENSG00000142765	5584	741	741	0	0	100	1	SYTL1	27342020	27353937	synaptotagmin like 1...	no	no	no	no
ENSG00000142733	5746	773	773	0	0	100	1	MAP3K6	27355184	27366961	mitogen-activated pr...	no	no	no	no
ENSG00000142748	2169	92	92	0	0	100	1	FCN3	27369110	27374824	ficolin 3 [Source:HG...	no	no	no	no
ENSG00000174950	1994	328	344	16	4	95.3488	1	CD164L2	27379176	27383333	CD164 molecule like ...	no	no	no	no
ENSG00000181773	2137	707	707	0	0	100	1	GPR3	27392622	27395814	G protein-coupled re...	no	no	no	no
ENSG00000158195	5681	15567	15601	34	0	99.7821	1	WASF2	27404230	27490167	WASP family member 2...	no	no	no	no
ENSG00000237429	283	2	2	0	0	100	1		27525805	27530561	novel transcript	no	no	no	no
ENSG00000126705	8297	2813	2813	0	0	100	1	AHDC1	27534035	27604431	AT-hook DNA binding ...	no	no	no	no
ENSG00000000938	3382	2	2	0	0	100	1	FGR	27612064	27635185	FGR proto-oncogene, ...	no	no	no	no
ENSG00000235912	192	10	10	0	0	100	1		27649419	27649610	novel pseudogene	no	no	no	no
ENSG00000126709	842	42	42	0	0	100	1	IFI6	27666064	27672212	interferon alpha ind...	no	no	no	no
ENSG00000009780	4046	814	826	12	1	98.5472	1	FAM76A	27725961	27763116	family with sequence...	no	no	no	no
ENSG00000231344	349	1	1	0	0	100	1		27739091	27739439	novel pseudogene	no	no	no	no
ENSG00000117758	3801	868	868	0	0	100	1	STX12	27773219	27824443	syntaxin 12 [Source:...	no	no	no	no
ENSG00000270031	359	2	2	0	0	100	1		27819983	27820341	novel transcript, se...	no	no	no	no
ENSG00000117751	2815	2512	2512	0	0	100	1	PPP1R8	27830782	27851676	protein phosphatase ...	no	no	no	no
ENSG00000252947	166	6	6	0	0	100	1	SCARNA1	27834401	27834566	small Cajal body-spe...	no	no	no	no
ENSG00000130775	4621	945	945	0	0	100	1	THEMIS2	27872543	27886685	thymocyte selection ...	no	no	no	no
ENSG00000117748	1981	2458	2458	0	0	100	1	RPA2	27891524	27914746	replication protein ...	no	no	no	no
ENSG00000130768	2663	1114	1338	224	16	83.2586	1	SMPDL3B	27935000	27959157	sphingomyelin phosph...	no	no	no	no
ENSG00000227050	491	8	8	0	0	100	1		27938875	27960193	novel transcript	no	no	no	no
ENSG00000158156	5180	1018	1024	6	0	99.4141	1	XKR8	27959588	27968093	XK related 8 [Source...	no	no	no	no
ENSG00000158161	6424	2441	2453	12	0	99.5108	1	EYA3	27970344	28088637	EYA transcriptional ...	no	no	no	no
ENSG00000238231	367	4	4	0	0	100	1		27990158	27990524	interferon-induced t...	no	no	no	no
ENSG00000228589	681	6	272	266	97	2.20588	1	SPCS2P4	28095742	28096422	signal peptidase com...	no	no	no	no
ENSG00000169403	4208	110	110	0	0	100	1	PTAFR	28147166	28193936	platelet activating ...	no	no	no	no
ENSG00000126698	2892	7228	7236	8	0	99.8894	1	DNAJC8	28199456	28233029	DnaJ heat shock prot...	no	no	no	no
ENSG00000130770	2225	2613	2657	44	1	98.344	1	ATP5IF1	28236109	28246906	ATP synthase inhibit...	no	no	no	no
ENSG00000270605	1945	220	220	0	0	100	1		28239509	28241453	novel transcript	no	no	no	no
ENSG00000130766	3462	3223	3247	24	0	99.2609	1	SESN2	28259518	28282491	sestrin 2 [Source:HG...	no	no	no	no
ENSG00000130772	2017	752	764	12	1	98.4293	1	MED18	28329002	28335965	mediator complex sub...	no	no	no	no
ENSG00000204138	7317	4816	4844	28	0	99.422	1	PHACTR4	28369582	28500364	phosphatase and acti...	no	no	no	no
ENSG00000180198	3888	5721	5731	10	0	99.8255	1	RCC1	28505943	28539300	regulator of chromos...	no	no	no	no
ENSG00000242125	4088	5078	5096	18	0	99.6468	1	SNHG3	28505980	28510892	small nucleolar RNA ...	no	no	no	no
ENSG00000200087	204	77	77	0	0	100	1	SNORA73B	28508559	28508762	small nucleolar RNA,...	no	no	no	no
ENSG00000231468	611	15	15	0	0	100	1	PRDX3P2	28526318	28527227	peroxiredoxin 3 pseu...	no	no	no	no
ENSG00000279443	2083	12	12	0	0	100	1		28544460	28546542	TEC	no	no	no	no
ENSG00000180098	4311	964	964	0	0	100	1	TRNAU1AP	28553085	28578545	tRNA selenocysteine ...	no	no	no	no
ENSG00000197989	4266	1185	1203	18	1	98.5037	1	SNHG12	28578538	28583132	small nucleolar RNA ...	no	no	no	no
ENSG00000221539	74	13	13	0	0	100	1	SNORD99	28578749	28578822	small nucleolar RNA,...	no	no	no	no
ENSG00000120656	2337	1161	1169	8	0	99.3157	1	TAF12	28587829	28648291	TATA-box binding pro...	no	no	no	no
ENSG00000188060	2200	424	434	10	2	97.6959	1	RAB42	28592200	28595449	RAB42, member RAS on...	no	no	no	no
ENSG00000229388	978	5	5	0	0	100	1	TAF12-DT	28643228	28648581	TAF12 divergent tran...	no	no	no	no
ENSG00000162419	6459	1572	1576	4	0	99.7462	1	GMEB1	28668778	28719353	glucocorticoid modul...	no	no	no	no
ENSG00000198492	3729	9949	10035	86	0	99.143	1	YTHDF2	28736621	28769775	YTH N6-methyladenosi...	no	no	no	no
ENSG00000116329	9345	305	309	4	1	98.7055	1	OPRD1	28812170	28871267	opioid receptor delt...	no	no	no	no
ENSG00000233427	1085	2	2	0	0	100	1		28870483	28877336	novel transcript	no	no	no	no
ENSG00000159023	19993	8324	8366	42	0	99.498	1	EPB41	28887091	29120046	erythrocyte membrane...	no	no	no	no
ENSG00000253304	2606	321	321	0	0	100	1	TMEM200B	29119429	29123903	transmembrane protei...	no	no	no	no
ENSG00000116350	8806	10777	10819	42	0	99.6118	1	SRSF4	29147743	29181900	serine and arginine ...	no	no	no	no
ENSG00000116353	4138	1322	1330	8	0	99.3985	1	MECR	29192657	29230942	mitochondrial trans-...	no	no	no	no
ENSG00000060656	6682	6435	6457	22	0	99.6593	1	PTPRU	29236516	29326813	protein tyrosine pho...	no	no	no	no
ENSG00000233399	1519	7	7	0	0	100	1	LINC01648	30013952	30037612	long intergenic non-...	no	no	no	no
ENSG00000162510	4604	20	20	0	0	100	1	MATN1	30711277	30723585	matrilin 1 [Source:H...	no	no	no	no
ENSG00000186056	4024	5	5	0	0	100	1	MATN1-AS1	30718504	30726827	MATN1 antisense RNA ...	no	no	no	no
ENSG00000162511	3228	6	6	0	0	100	1	LAPTM5	30732469	30757774	lysosomal protein tr...	no	no	no	no
ENSG00000162512	7065	4873	4885	12	0	99.7544	1	SDC3	30869466	30908758	syndecan 3 [Source:H...	no	no	no	no
ENSG00000134644	6621	10698	10846	148	1	98.6354	1	PUM1	30931506	31065991	pumilio RNA binding ...	no	no	no	no
ENSG00000237329	507	4	4	0	0	100	1		31036734	31037240	TAF9 RNA polymerase ...	no	no	no	no
ENSG00000084628	3320	3863	3863	0	0	100	1	NKAIN1	31179745	31239887	sodium/potassium tra...	no	no	no	no
ENSG00000060688	3887	4126	4142	16	0	99.6137	1	SNRNP40	31259568	31296788	small nuclear ribonu...	no	no	no	no
ENSG00000229447	437	45	45	0	0	100	1		31263245	31263681	general transcriptio...	no	no	no	no
ENSG00000121766	1921	1833	1833	0	0	100	1	ZCCHC17	31296982	31364953	zinc finger CCHC-typ...	no	no	no	no
ENSG00000229044	439	1	1	0	0	100	1		31333067	31346799	novel transcript	no	no	no	no
ENSG00000121769	1398	468	468	0	0	100	1	FABP3	31365253	31376850	fatty acid binding p...	no	no	no	no
ENSG00000168528	3452	2152	2216	64	2	97.1119	1	SERINC2	31409565	31434680	serine incorporator ...	no	no	no	no
ENSG00000284543	9848	8	8	0	0	100	1	LINC01226	31506226	31583306	long intergenic non-...	no	no	no	no
ENSG00000229167	813	2	2	0	0	100	1		31571585	31577898	novel transcript	no	no	no	no
ENSG00000142910	5281	1023	1027	4	0	99.6105	1	TINAGL1	31576485	31587686	tubulointerstitial n...	no	no	no	no
ENSG00000121764	2558	4	8	4	50	50	1	HCRTR1	31617686	31632518	hypocretin receptor ...	no	no	no	no
ENSG00000162517	2223	1197	1201	4	0	99.6669	1	PEF1	31629866	31644896	penta-EF-hand domain...	no	no	no	no
ENSG00000235790	2216	44	44	0	0	100	1	PEF1-AS1	31644049	31660162	PEF1 and COL16A1 ant...	no	no	no	no
ENSG00000084636	9253	986	986	0	0	100	1	COL16A1	31652263	31704319	collagen type XVI al...	no	no	no	no
ENSG00000121753	7756	2194	2194	0	0	100	1	ADGRB2	31727117	31764893	adhesion G protein-c...	no	no	no	no
ENSG00000254545	537	2	2	0	0	100	1		31789130	31791322	novel transcript	no	no	no	no
ENSG00000134668	7085	149	149	0	0	100	1	SPOCD1	31790422	31816022	SPOC domain containi...	no	no	no	no
ENSG00000269967	587	1	1	0	0	100	1		31851913	31921841	novel transcript	no	no	no	no
ENSG00000184007	6708	11003	11123	120	1	98.9212	1	PTP4A2	31906421	31944856	protein tyrosine pho...	no	no	no	no
ENSG00000228634	517	2	2	0	0	100	1		31933020	31933975	novel transcript	no	no	no	no
ENSG00000121774	3544	25731	26162	431	1	98.3526	1	KHDRBS1	32013868	32060850	KH RNA binding domai...	no	no	no	no
ENSG00000121775	2787	674	674	0	0	100	1	TMEM39B	32072031	32102866	transmembrane protei...	no	no	no	no
ENSG00000025800	7457	8517	8551	34	0	99.6024	1	KPNA6	32108056	32176563	karyopherin subunit ...	no	no	no	no
ENSG00000084652	5114	5545	5581	36	0	99.355	1	TXLNA	32179675	32198285	taxilin alpha [Sourc...	no	no	no	no
ENSG00000160050	2609	556	556	0	0	100	1	CCDC28B	32200595	32205453	coiled-coil domain c...	no	no	no	no
ENSG00000224066	1357	16	16	0	0	100	1		32204769	32206814	novel transcript	no	no	no	no
ENSG00000160051	2463	306	306	0	0	100	1	IQCC	32205671	32208682	IQ motif containing ...	no	no	no	no
ENSG00000222046	1869	20	20	0	0	100	1	DCDC2B	32209089	32216192	doublecortin domain ...	no	no	no	no
ENSG00000160055	3571	173	173	0	0	100	1	TMEM234	32214472	32222359	transmembrane protei...	no	no	no	no
ENSG00000084623	1725	11311	11431	120	1	98.9502	1	EIF3I	32221077	32245397	eukaryotic translati...	no	no	no	no
ENSG00000220785	2961	896	898	2	0	99.7773	1	MTMR9LP	32231847	32241592	myotubularin related...	no	no	no	no
ENSG00000183615	947	257	257	0	0	100	1	FAM167B	32247222	32248856	family with sequence...	no	no	no	no
ENSG00000182866	3339	4115	4115	0	0	100	1	LCK	32251244	32286165	LCK proto-oncogene, ...	no	no	no	no
ENSG00000252450	110	4	4	0	0	100	1		32286452	32286561	Y RNA [Source:RFAM;A...	no	no	no	no
ENSG00000116478	3966	6133	6149	16	0	99.7398	1	HDAC1	32292083	32333635	histone deacetylase ...	no	no	no	no
ENSG00000175130	1546	28063	28220	157	0	99.4437	1	MARCKSL1	32333839	32336233	MARCKS like 1 [Sourc...	no	no	no	no
ENSG00000162526	1849	34	34	0	0	100	1	TSSK3	32351521	32364312	testis specific seri...	no	no	no	no
ENSG00000225828	2845	125	125	0	0	100	1	FAM229A	32361270	32364278	family with sequence...	no	no	no	no
ENSG00000160058	6741	2915	2919	4	0	99.863	1	BSDC1	32364633	32394731	BSD domain containin...	no	no	no	no
ENSG00000224333	1007	6	6	0	0	100	1	GAPDHP20	32402109	32403115	glyceraldehyde 3 pho...	no	no	no	no
ENSG00000229259	1801	13	13	0	0	100	1	LRRC37A12P	32423214	32426789	leucine rich repeat ...	no	no	no	no
ENSG00000254553	3447	1	1	0	0	100	1		32465057	32600792	novel transcript	no	no	no	no
ENSG00000273274	12831	874	878	4	0	99.5444	1	ZBTB8B	32465072	32496686	zinc finger and BTB ...	no	no	no	no
ENSG00000160062	7077	878	882	4	0	99.5465	1	ZBTB8A	32539427	32605941	zinc finger and BTB ...	no	no	no	no
ENSG00000176261	3531	916	918	2	0	99.7821	1	ZBTB8OS	32600172	32650903	zinc finger and BTB ...	no	no	no	no
ENSG00000200591	102	4	4	0	0	100	1		32639951	32640052	Y RNA [Source:RFAM;A...	no	no	no	no
ENSG00000162521	9470	12723	12844	121	0	99.0579	1	RBBP4	32651142	32686211	RB binding protein 4...	no	no	no	no
ENSG00000162520	3722	2	2	0	0	100	1	SYNC	32679906	32703596	syncoilin, intermedi...	no	no	no	no
ENSG00000224409	395	4	4	0	0	100	1		32717734	32725237	novel transcript	no	no	no	no
ENSG00000162522	6020	8808	8832	24	0	99.7283	1	KIAA1522	32741830	32774970	KIAA1522 [Source:HGN...	no	no	no	no
ENSG00000134684	9897	15446	15458	12	0	99.9224	1	YARS1	32775237	32818031	tyrosyl-tRNA synthet...	no	no	no	no
ENSG00000116497	9190	3784	3792	8	0	99.789	1	S100PBP	32816767	32858875	S100P binding protei...	no	no	no	no
ENSG00000160097	3199	22	22	0	0	100	1	FNDC5	32862268	32872482	fibronectin type III...	no	no	no	no
ENSG00000121905	1964	60	60	0	0	100	1	HPCA	32885994	32898441	hippocalcin [Source:...	no	no	no	no
ENSG00000121900	1417	93	93	0	0	100	1	TMEM54	32894594	32901438	transmembrane protei...	no	no	no	no
ENSG00000287691	575	3	3	0	0	100	1		32925454	32951638	novel transcript, an...	no	no	no	no
ENSG00000116514	2610	1321	1325	4	0	99.6981	1	RNF19B	32936445	32964809	ring finger protein ...	no	no	no	no
ENSG00000004455	9625	6691	6735	44	0	99.3467	1	AK2	33007986	33080996	adenylate kinase 2 [...	no	no	no	no
ENSG00000142920	9581	76	76	0	0	100	1	AZIN2	33081104	33123492	antizyme inhibitor 2...	no	no	no	no
ENSG00000278997	1360	46	46	0	0	100	1		33141871	33143230	TEC	no	no	no	no
ENSG00000116525	3976	793	793	0	0	100	1	TRIM62	33145399	33182059	tripartite motif con...	no	no	no	no
ENSG00000279179	3448	30	30	0	0	100	1		33162851	33166298	TEC	no	no	no	no
ENSG00000160094	3384	1441	1473	32	2	97.8276	1	ZNF362	33256492	33300719	zinc finger protein ...	no	no	no	no
ENSG00000270115	469	10	10	0	0	100	1		33261212	33261680	novel transcript	no	no	no	no
ENSG00000225313	4015	15	15	0	0	100	1		33307348	33349245	novel transcript	no	no	no	no
ENSG00000134686	4975	1176	1186	10	0	99.1568	1	PHC2	33323623	33431095	polyhomeotic homolog...	no	no	no	no
ENSG00000284154	100	3	3	0	0	100	1	MIR3605	33332393	33332492	microRNA 3605 [Sourc...	no	no	no	no
ENSG00000233246	490	1	1	0	0	100	1	PHC2-AS1	33350352	33363245	PHC2 antisense RNA 1...	no	no	no	no
ENSG00000121903	5308	224	228	4	1	98.2456	1	ZSCAN20	33472645	33501643	zinc finger and SCAN...	no	no	no	no
ENSG00000235907	736	4	4	0	0	100	1		33512008	33512743	proteasome (prosome,...	no	no	no	no
ENSG00000121904	18157	2747	2751	4	0	99.8546	1	CSMD2	33513998	34165842	CUB and Sushi multip...	no	no	no	no
ENSG00000142698	3339	642	646	4	0	99.3808	1	C1orf94	34166883	34219131	chromosome 1 open re...	no	no	no	no
ENSG00000163866	10337	1268	1292	24	1	98.1424	1	SMIM12	34712737	34859755	small integral membr...	no	no	no	no
ENSG00000189280	1355	78	78	0	0	100	1	GJB5	34755047	34758512	gap junction protein...	no	no	no	no
ENSG00000189433	1444	4	4	0	0	100	1	GJB4	34759740	34762327	gap junction protein...	no	no	no	no
ENSG00000188910	2362	34	34	0	0	100	1	GJB3	34781214	34786369	gap junction protein...	no	no	no	no
ENSG00000187513	1716	50	50	0	0	100	1	GJA4	34792999	34795747	gap junction protein...	no	no	no	no
ENSG00000116544	4042	656	656	0	0	100	1	DLGAP3	34865436	34929650	DLG associated prote...	no	no	no	no
ENSG00000284773	3163	32	32	0	0	100	1		34974356	34985313	novel protein	no	no	no	no
ENSG00000241014	1887	2	2	0	0	100	1	GPR199P	34975699	34978706	G protein-coupled re...	no	no	no	no
ENSG00000163867	9568	541	545	4	0	99.2661	1	ZMYM6	34986165	35031945	zinc finger MYM-type...	no	no	no	no
ENSG00000197056	5205	2348	2348	0	0	100	1	ZMYM1	35032172	35115859	zinc finger MYM-type...	no	no	no	no
ENSG00000284640	1886	6	6	0	0	100	1		35141515	35146435	novel transcript	no	no	no	no
ENSG00000116560	7419	38037	38165	128	0	99.6646	1	SFPQ	35176378	35193446	splicing factor prol...	no	no	no	no
ENSG00000146463	7905	8902	8906	4	0	99.9551	1	ZMYM4	35268709	35422058	zinc finger MYM-type...	no	no	no	no
ENSG00000229994	886	8	10	2	20	80	1	RPL5P4	35350722	35351607	ribosomal protein L5...	no	no	no	no
ENSG00000142687	9619	6965	7005	40	0	99.429	1	KIAA0319L	35393883	35557950	KIAA0319 like [Sourc...	no	no	no	no
ENSG00000020129	4917	2403	2427	24	0	99.0111	1	NCDN	35557473	35567274	neurochondrin [Sourc...	no	no	no	no
ENSG00000239636	1030	7	7	0	0	100	1	TFAP2E-AS1	35569807	35577779	TFAP2E antisense RNA...	no	no	no	no
ENSG00000116819	2272	35	35	0	0	100	1	TFAP2E	35573314	35595328	transcription factor...	no	no	no	no
ENSG00000126067	4528	6752	6796	44	0	99.3526	1	PSMB2	35599541	35641526	proteasome 20S subun...	no	no	no	no
ENSG00000142686	3049	627	627	0	0	100	1	C1orf216	35713877	35718894	chromosome 1 open re...	no	no	no	no
ENSG00000092853	9591	2979	3007	28	0	99.0688	1	CLSPN	35720218	35769978	claspin [Source:HGNC...	no	no	no	no
ENSG00000134698	7423	2076	2092	16	0	99.2352	1	AGO4	35808016	35857890	argonaute RISC compo...	no	no	no	no
ENSG00000092847	13890	8441	8525	84	0	99.0147	1	AGO1	35869808	35930532	argonaute RISC compo...	no	no	no	no
ENSG00000126070	21153	2260	2272	12	0	99.4718	1	AGO3	35930718	36072500	argonaute RISC catal...	no	no	no	no
ENSG00000271554	659	10	10	0	0	100	1		35992109	36013630	novel transcript, an...	no	no	no	no
ENSG00000092850	1959	21	21	0	0	100	1	TEKT2	36084094	36088275	tektin 2 [Source:HGN...	no	no	no	no
ENSG00000116863	1651	1217	1217	0	0	100	1	ADPRS	36088892	36093932	ADP-ribosylserine hy...	no	no	no	no
ENSG00000171812	4669	398	398	0	0	100	1	COL8A2	36095239	36125222	collagen type VIII a...	no	no	no	no
ENSG00000054116	3527	2073	2077	4	0	99.8074	1	TRAPPC3	36136570	36156053	trafficking protein ...	no	no	no	no
ENSG00000116871	5271	5899	5915	16	0	99.7295	1	MAP7D1	36155579	36180849	MAP7 domain containi...	no	no	no	no
ENSG00000054118	4720	16103	16166	63	0	99.6103	1	THRAP3	36224432	36305357	thyroid hormone rece...	no	no	no	no
ENSG00000214193	8142	2679	2707	28	1	98.9656	1	SH3D21	36306368	36329340	SH3 domain containin...	no	no	no	no
ENSG00000286379	4878	227	235	8	3	96.5957	1		36329630	36335406	novel transcript	no	no	no	no
ENSG00000196182	5618	1987	1987	0	0	100	1	STK40	36339624	36385924	serine/threonine kin...	no	no	no	no
ENSG00000181817	1506	1275	1275	0	0	100	1	LSM10	36391238	36397908	LSM10, U7 small nucl...	no	no	no	no
ENSG00000116885	2788	82	82	0	0	100	1	OSCP1	36415827	36450451	organic solute carri...	no	no	no	no
ENSG00000116898	2863	4022	4026	4	0	99.9006	1	MRPS15	36455718	36464384	mitochondrial riboso...	no	no	no	no
ENSG00000284705	2694	4	4	0	0	100	1		36703953	36710582	novel transcript	no	no	no	no
ENSG00000163873	10497	197	197	0	0	100	1	GRIK3	36795527	37034515	glutamate ionotropic...	no	no	no	no
ENSG00000233621	3019	51	51	0	0	100	1	ZC3H12A-DT	37350934	37474432	ZC3H12A divergent tr...	no	no	no	no
ENSG00000163874	3091	798	798	0	0	100	1	ZC3H12A	37474580	37484377	zinc finger CCCH-typ...	no	no	no	no
ENSG00000163875	6061	1799	1819	20	1	98.9005	1	MEAF6	37489993	37514766	MYST/Esa1 associated...	no	no	no	no
ENSG00000263675	60	9	9	0	0	100	1	MIR5581	37500935	37500994	microRNA 5581 [Sourc...	no	no	no	no
ENSG00000163877	5718	1167	1207	40	3	96.686	1	SNIP1	37534449	37554293	Smad nuclear interac...	no	no	no	no
ENSG00000232273	532	3	3	0	0	100	1	FTH1P1	37544763	37545294	ferritin heavy chain...	no	no	no	no
ENSG00000163879	4456	741	741	0	0	100	1	DNALI1	37556919	37566857	dynein axonemal ligh...	no	no	no	no
ENSG00000134697	5747	7878	7890	12	0	99.8479	1	GNL2	37566816	37595937	G protein nucleolar ...	no	no	no	no
ENSG00000169218	3058	14	18	4	22	77.7778	1	RSPO1	37611350	37634892	R-spondin 1 [Source:...	no	no	no	no
ENSG00000116922	4434	1939	1951	12	0	99.3849	1	C1orf109	37681570	37692249	chromosome 1 open re...	no	no	no	no
ENSG00000134690	2406	3827	3827	0	0	100	1	CDCA8	37692481	37709719	cell division cycle ...	no	no	no	no
ENSG00000183317	8152	119	119	0	0	100	1	EPHA10	37713880	37765133	EPH receptor A10 [So...	no	no	no	no
ENSG00000185090	3018	106	108	2	1	98.1481	1	MANEAL	37793847	37801137	mannosidase endo-alp...	no	no	no	no
ENSG00000196449	1848	1035	1042	7	0	99.3282	1	YRDC	37802945	37808208	yrdC N6-threonylcarb...	no	no	no	no
ENSG00000197982	2231	872	877	5	0	99.4299	1	C1orf122	37806979	37809454	chromosome 1 open re...	no	no	no	no
ENSG00000188786	7989	1267	1275	8	0	99.3725	1	MTF1	37809574	37859592	metal regulatory tra...	no	no	no	no
ENSG00000235673	691	1	1	0	0	100	1		37840986	37841676	ribosomal protein S2...	no	no	no	no
ENSG00000204084	8930	1629	1637	8	0	99.5113	1	INPP5B	37860697	37947057	inositol polyphospha...	no	no	no	no
ENSG00000252448	81	2	2	0	0	100	1		37884237	37884317	Small nucleolar RNA ...	no	no	no	no
ENSG00000183431	3894	10370	10414	44	0	99.5775	1	SF3A3	37956975	37990075	splicing factor 3a s...	no	no	no	no
ENSG00000212541	108	4	4	0	0	100	1	RNU6-510P	37991462	37991569	RNA, U6 small nuclea...	no	no	no	no
ENSG00000183386	2004	1406	1410	4	0	99.7163	1	FHL3	37996770	38005606	four and a half LIM ...	no	no	no	no
ENSG00000183520	3381	2732	2762	30	1	98.9138	1	UTP11	38009258	38024820	UTP11 small subunit ...	no	no	no	no
ENSG00000185668	2965	2780	2816	36	1	98.7216	1	POU3F1	38043829	38046793	POU class 3 homeobox...	no	no	no	no
ENSG00000224592	684	143	143	0	0	100	1	MIR3659HG	38047314	38119025	MIR3659 host gene [S...	no	no	no	no
ENSG00000223589	340	2	2	0	0	100	1		38080572	38080911	FK506 binding protei...	no	no	no	no
ENSG00000284623	1562	16	16	0	0	100	1	LINC02786	38129464	38140593	long intergenic non-...	no	no	no	no
ENSG00000287987	1235	4	4	0	0	100	1		38193619	38210340	novel transcript	no	no	no	no
ENSG00000237290	2573	13	13	0	0	100	1	LINC01343	38209034	38214806	long intergenic non-...	no	no	no	no
ENSG00000238063	3673	2	2	0	0	100	1	LINC01685	38474825	38516520	long intergenic non-...	no	no	no	no
ENSG00000116954	5116	497	503	6	1	98.8072	1	RRAGC	38838198	38859772	Ras related GTP bind...	no	no	no	no
ENSG00000214114	2773	1160	1164	4	0	99.6564	1	MYCBP	38862493	38873368	MYC binding protein ...	no	no	no	no
ENSG00000131233	2439	2	2	0	0	100	1	GJA9	38874069	38881587	gap junction protein...	no	no	no	no
ENSG00000158315	2826	40	40	0	0	100	1	RHBDL2	38885807	38941830	rhomboid like 2 [Sou...	no	no	no	no
ENSG00000174574	2688	15883	15967	84	0	99.4739	1	AKIRIN1	38991276	39006059	akirin 1 [Source:HGN...	no	no	no	no
ENSG00000168653	548	11026	11030	4	0	99.9637	1	NDUFS5	39026318	39034636	NADH:ubiquinone oxid...	no	no	no	no
ENSG00000127603	42738	52212	52830	618	1	98.8302	1	MACF1	39081316	39487177	microtubule actin cr...	no	no	no	no
ENSG00000183682	5636	378	410	32	7	92.1951	1	BMP8A	39491636	39529869	bone morphogenetic p...	no	no	no	no
ENSG00000237624	1535	81	181	100	55	44.7514	1	OXCT2P1	39514956	39516490	3-oxoacid CoA-transf...	no	no	no	no
ENSG00000243970	5416	479	479	0	0	100	1	PPIEL	39531838	39558707	peptidylprolyl isome...	no	no	no	no
ENSG00000090621	6782	15760	15981	221	1	98.6171	1	PABPC4	39560709	39576790	poly(A) binding prot...	no	no	no	no
ENSG00000228060	1408	171	171	0	0	100	1	PABPC4-AS1	39565052	39573860	PABPC4 antisense RNA...	no	no	no	no
ENSG00000201457	135	25	25	0	0	100	1	SNORA55	39567374	39567508	small nucleolar RNA,...	no	no	no	no
ENSG00000163909	4077	484	488	4	0	99.1803	1	HEYL	39623435	39639643	hes related family b...	no	no	no	no
ENSG00000225903	304	4	4	0	0	100	1		39633416	39633903	novel transcript	no	no	no	no
ENSG00000116983	4758	456	456	0	0	100	1	HPCAL4	39678648	39691485	hippocalcin like 4 [...	no	no	no	no
ENSG00000084072	11124	2422	2426	4	0	99.8351	1	PPIE	39692182	39763914	peptidylprolyl isome...	no	no	no	no
ENSG00000116985	4826	173	197	24	12	87.8173	1	BMP8B	39757182	39788865	bone morphogenetic p...	no	no	no	no
ENSG00000198754	1826	98	198	100	50	49.4949	1	OXCT2	39769523	39771348	3-oxoacid CoA-transf...	no	no	no	no
ENSG00000285905	1218	2	2	0	0	100	1	BMP8B-AS1	39779969	39781418	BMP8B antisense RNA ...	no	no	no	no
ENSG00000261798	1196	5	5	0	0	100	1		39788976	39790171	novel transcript, an...	no	no	no	no
ENSG00000284719	1744	2	2	0	0	100	1		39799419	39809450	novel transcript	no	no	no	no
ENSG00000043514	6533	2473	2477	4	0	99.8385	1	TRIT1	39838110	39883511	tRNA isopentenyltran...	no	no	no	no
ENSG00000116990	5063	3001	3005	4	0	99.8669	1	MYCL	39895426	39902256	MYCL proto-oncogene,...	no	no	no	no
ENSG00000168389	4007	1333	1335	2	0	99.8502	1	MFSD2A	39955112	39969968	major facilitator su...	no	no	no	no
ENSG00000228477	725	50	50	0	0	100	1		39962680	39963404	ribosomal protein S2...	no	no	no	no
ENSG00000131236	3814	15427	15527	100	0	99.356	1	CAP1	40040233	40072649	cyclase associated a...	no	no	no	no
ENSG00000131238	3372	8105	8207	102	1	98.7572	1	PPT1	40072710	40097260	palmitoyl-protein th...	no	no	no	no
ENSG00000117000	6232	2790	2790	0	0	100	1	RLF	40161387	40240921	RLF zinc finger [Sou...	no	no	no	no
ENSG00000259943	1541	362	362	0	0	100	1	ZMPSTE24-DT	40256333	40257971	ZMPSTE24 divergent t...	no	no	no	no
ENSG00000084073	4022	1987	2003	16	0	99.2012	1	ZMPSTE24	40258041	40294180	zinc metallopeptidas...	no	no	no	no
ENSG00000049089	4215	275	275	0	0	100	1	COL9A2	40300489	40317813	collagen type IX alp...	no	no	no	no
ENSG00000084070	3601	328	328	0	0	100	1	SMAP2	40344850	40423326	small ArfGAP2 [Sourc...	no	no	no	no
ENSG00000187801	2566	594	594	0	0	100	1	ZFP69B	40450102	40463718	ZFP69 zinc finger pr...	no	no	no	no
ENSG00000260920	2449	548	556	8	1	98.5612	1		40464319	40466767	novel transcript, se...	no	no	no	no
ENSG00000279667	1005	75	75	0	0	100	1		40473055	40474059	TEC	no	no	no	no
ENSG00000187815	3173	478	478	0	0	100	1	ZFP69	40477290	40496343	ZFP69 zinc finger pr...	no	no	no	no
ENSG00000238287	605	13	13	0	0	100	1	EXO5-DT	40493157	40508661	EXO5 divergent trans...	no	no	no	no
ENSG00000164002	3092	98	100	2	2	98	1	EXO5	40508741	40516038	exonuclease 5 [Sourc...	no	no	no	no
ENSG00000238186	546	4	4	0	0	100	1		40515754	40517174	novel transcript	no	no	no	no
ENSG00000117010	3101	387	387	0	0	100	1	ZNF684	40531573	40548167	zinc finger protein ...	no	no	no	no
ENSG00000117016	7259	4488	4488	0	0	100	1	RIMS3	40620680	40665682	regulating synaptic ...	no	no	no	no
ENSG00000237899	471	4	4	0	0	100	1		40669089	40687588	novel transcript	no	no	no	no
ENSG00000272145	1687	44	44	0	0	100	1	NFYC-AS1	40690380	40692074	NFYC antisense RNA 1...	no	no	no	no
ENSG00000066136	5990	2068	2084	16	0	99.2322	1	NFYC	40691648	40771603	nuclear transcriptio...	no	no	no	no
ENSG00000117013	4408	370	370	0	0	100	1	KCNQ4	40783787	40840452	potassium voltage-ga...	no	no	no	no
ENSG00000179862	1310	882	882	0	0	100	1	CITED4	40861054	40862363	Cbp/p300 interacting...	no	no	no	no
ENSG00000171793	11164	6152	6160	8	0	99.8701	1	CTPS1	40979300	41012565	CTP synthase 1 [Sour...	no	no	no	no
ENSG00000281207	4800	151	151	0	0	100	1	SLFNL1-AS1	41014590	41043890	SLFNL1 antisense RNA...	no	no	no	no
ENSG00000171790	4310	84	84	0	0	100	1	SLFNL1	41015589	41023237	schlafen like 1 [Sou...	no	no	no	no
ENSG00000010803	4447	1052	1064	12	1	98.8722	1	SCMH1	41027202	41242306	Scm polycomb group p...	no	no	no	no
ENSG00000235358	2252	14	14	0	0	100	1	SCMH1-DT	41242373	41284861	SCMH1 divergent tran...	no	no	no	no
ENSG00000286640	1348	14	14	0	0	100	1		41302938	41303972	SET domain and marin...	no	no	no	no
ENSG00000204060	2398	369	369	0	0	100	1	FOXO6	41361922	41383590	forkhead box O6 [Sou...	no	no	no	no
ENSG00000127129	1649	36	36	0	0	100	1	EDN2	41478775	41484683	endothelin 2 [Source...	no	no	no	no
ENSG00000127124	14625	52	52	0	0	100	1	HIVEP3	41506365	42035925	HIVEP zinc finger 3 ...	no	no	no	no
ENSG00000198815	6896	5710	5718	8	0	99.8601	1	FOXJ3	42176539	42335877	forkhead box J3 [Sou...	no	no	no	no
ENSG00000227527	661	6	6	0	0	100	1		42335386	42338376	novel transcript	no	no	no	no
ENSG00000177181	10638	1525	1525	0	0	100	1	RIMKLA	42380792	42424232	ribosomal modificati...	no	no	no	no
ENSG00000235002	397	8	8	0	0	100	1		42412398	42412794	ribosomal protein S1...	no	no	no	no
ENSG00000066185	2181	42	42	0	0	100	1	ZMYND12	42430329	42456253	zinc finger MYND-typ...	no	no	no	no
ENSG00000127125	3412	1648	1652	4	0	99.7579	1	PPCS	42456117	42473385	phosphopantothenoylc...	no	no	no	no
ENSG00000186409	25206	72	72	0	0	100	1	CCDC30	42463221	42657190	coiled-coil domain c...	no	no	no	no
ENSG00000171960	1446	949	957	8	0	99.1641	1	PPIH	42658335	42676758	peptidylprolyl isome...	no	no	no	no
ENSG00000285728	3315	385	385	0	0	100	1		42658687	42682207	novel transcript, an...	no	no	no	no
ENSG00000234917	601	2	2	0	0	100	1		42678735	42681659	novel transcript	no	no	no	no
ENSG00000065978	3395	91307	92095	788	0	99.1444	1	YBX1	42682418	42703805	Y-box binding protei...	no	no	no	no
ENSG00000164007	3602	1126	1126	0	0	100	1	CLDN19	42733093	42740254	claudin 19 [Source:H...	no	no	no	no
ENSG00000117385	6766	3707	3731	24	0	99.3567	1	P3H1	42746335	42767084	prolyl 3-hydroxylase...	no	no	no	no
ENSG00000164008	5286	251	251	0	0	100	1	C1orf50	42767245	42779491	chromosome 1 open re...	no	no	no	no
ENSG00000274386	4373	23	23	0	0	100	1	TMEM269	42784991	42816619	transmembrane protei...	no	no	no	no
ENSG00000177868	1353	467	475	8	1	98.3158	1	SVBP	42807052	42817397	small vasohibin bind...	no	no	no	no
ENSG00000164010	5720	209	209	0	0	100	1	ERMAP	42817122	42844991	erythroblast membran...	no	no	no	no
ENSG00000228192	3776	62	66	4	6	93.9394	1	ZNF691-DT	42832522	42846427	ZNF691 divergent tra...	no	no	no	no
ENSG00000164011	2036	818	818	0	0	100	1	ZNF691	42846573	42852477	zinc finger protein ...	no	no	no	no
ENSG00000117394	6614	41908	42084	176	0	99.5818	1	SLC2A1	42925353	42958893	solute carrier famil...	no	no	no	no
ENSG00000227533	4275	137	137	0	0	100	1	SLC2A1-DT	42959049	42996814	SLC2A1 divergent tra...	no	no	no	no
ENSG00000283973	1097	16	16	0	0	100	1		42959065	42961864	novel transcript	no	no	no	no
ENSG00000207256	107	6	6	0	0	100	1	RNU6-880P	42991438	42991544	RNA, U6 small nuclea...	no	no	no	no
ENSG00000186973	843	65	65	0	0	100	1	FAM183A	43145153	43156396	family with sequence...	no	no	no	no
ENSG00000117395	3561	4273	4281	8	0	99.8131	1	EBNA1BP2	43164175	43270936	EBNA1 binding protei...	no	no	no	no
ENSG00000243710	5583	18	18	0	0	100	1	CFAP57	43172330	43254358	cilia and flagella a...	no	no	no	no
ENSG00000179178	2138	901	901	0	0	100	1	TMEM125	43269983	43274002	transmembrane protei...	no	no	no	no
ENSG00000253313	1522	500	500	0	0	100	1	C1orf210	43281877	43285617	chromosome 1 open re...	no	no	no	no
ENSG00000066056	6705	321	321	0	0	100	1	TIE1	43300982	43323108	tyrosine kinase with...	no	no	no	no
ENSG00000117400	3937	62	62	0	0	100	1	MPL	43337818	43354466	MPL proto-oncogene, ...	no	no	no	no
ENSG00000287113	557	5	5	0	0	100	1		43348288	43348844	novel transcript, an...	no	no	no	no
ENSG00000234694	661	33	33	0	0	100	1	CDC20-DT	43354684	43358676	CDC20 divergent tran...	no	no	no	no
ENSG00000117399	2012	12656	12893	237	1	98.1618	1	CDC20	43358981	43363203	cell division cycle ...	no	no	no	no
ENSG00000066322	2506	903	903	0	0	100	1	ELOVL1	43363398	43368074	ELOVL fatty acid elo...	no	no	no	no
ENSG00000159479	2704	673	681	8	1	98.8253	1	MED8	43383917	43389808	mediator complex sub...	no	no	no	no
ENSG00000229431	731	15	15	0	0	100	1	MED8-AS1	43385113	43389155	MED8 antisense RNA 1...	no	no	no	no
ENSG00000198198	26354	1631	1639	8	0	99.5119	1	SZT2	43389882	43454247	SZT2 subunit of KICS...	no	no	no	no
ENSG00000142949	10712	35259	35545	286	0	99.1954	1	PTPRF	43525187	43623666	protein tyrosine pho...	no	no	no	no
ENSG00000066135	5184	2664	2670	6	0	99.7753	1	KDM4A	43650149	43705518	lysine demethylase 4...	no	no	no	no
ENSG00000236200	4217	149	151	2	1	98.6755	1	KDM4A-AS1	43685123	43708138	KDM4A antisense RNA ...	no	no	no	no
ENSG00000126091	19448	247	253	6	2	97.6285	1	ST3GAL3	43705824	43931165	ST3 beta-galactoside...	no	no	no	no
ENSG00000117407	2657	732	736	4	0	99.4565	1	ARTN	43933320	43937240	artemin [Source:HGNC...	no	no	no	no
ENSG00000237950	2224	32	32	0	0	100	1	LINC02918	43937918	43940781	long intergenic non-...	no	no	no	no
ENSG00000288573	557	11	11	0	0	100	1		43944355	43946624	novel transcript	no	no	no	no
ENSG00000117408	5072	1104	1104	0	0	100	1	IPO13	43946950	43968022	importin 13 [Source:...	no	no	no	no
ENSG00000132768	2930	2692	2692	0	0	100	1	DPH2	43970000	43973369	diphthamide biosynth...	no	no	no	no
ENSG00000117410	3239	1764	1764	0	0	100	1	ATP6V0B	43974487	43978295	ATPase H+ transporti...	no	no	no	no
ENSG00000117411	3772	4802	4822	20	0	99.5852	1	B4GALT2	43978943	43991170	beta-1,4-galactosylt...	no	no	no	no
ENSG00000159214	3563	726	726	0	0	100	1	CCDC24	43991359	43996528	coiled-coil domain c...	no	no	no	no
ENSG00000196517	5249	837	837	0	0	100	1	SLC6A9	43991500	44031467	solute carrier famil...	no	no	no	no
ENSG00000230615	10561	54	54	0	0	100	1		44030414	44115913	novel transcript	no	no	no	no
ENSG00000283039	3159	67	67	0	0	100	1	KLF18	44137821	44141631	KLF transcription fa...	no	no	no	no
ENSG00000226804	1160	1	1	0	0	100	1		44150594	44151753	zinc finger protein ...	no	no	no	no
ENSG00000271329	796	3	3	0	0	100	1		44187943	44189049	metaxin 3 (MTX3) pse...	no	no	no	no
ENSG00000178028	5599	1776	1780	4	0	99.7753	1	DMAP1	44213455	44220681	DNA methyltransferas...	no	no	no	no
ENSG00000117419	2785	3669	3673	4	0	99.8911	1	ERI3	44221070	44355260	ERI1 exoribonuclease...	no	no	no	no
ENSG00000233602	619	31	31	0	0	100	1	ERI3-IT1	44243408	44244273	ERI3 intronic transc...	no	no	no	no
ENSG00000187147	9687	3774	3794	20	0	99.4729	1	RNF220	44405194	44651724	ring finger protein ...	no	no	no	no
ENSG00000126106	3561	204	204	0	0	100	1	TMEM53	44635238	44674481	transmembrane protei...	no	no	no	no
ENSG00000198520	3290	10	10	0	0	100	1	ARMH1	44674692	44725591	armadillo like helic...	no	no	no	no
ENSG00000199377	117	4	4	0	0	100	1	RNU5F-1	44721786	44721902	RNA, U5F small nucle...	no	no	no	no
ENSG00000142945	3646	6747	6749	2	0	99.9704	1	KIF2C	44739818	44767767	kinesin family membe...	no	no	no	no
ENSG00000225721	765	19	19	0	0	100	1		44759037	44775810	novel transcript	no	no	no	no
ENSG00000142937	2781	55906	55959	53	0	99.9053	1	RPS8	44775251	44778779	ribosomal protein S8...	no	no	no	no
ENSG00000200913	104	26	26	0	0	100	1	SNORD46	44776490	44776593	small nucleolar RNA,...	no	no	no	no
ENSG00000142959	2512	164	164	0	0	100	1	BEST4	44783585	44788170	bestrophin 4 [Source...	no	no	no	no
ENSG00000173846	3327	725	725	0	0	100	1	PLK3	44800377	44805990	polo like kinase 3 [...	no	no	no	no
ENSG00000222009	3520	91	91	0	0	100	1	BTBD19	44808523	44815585	BTB domain containin...	no	no	no	no
ENSG00000117425	5334	71	71	0	0	100	1	PTCH2	44819844	44843253	patched 2 [Source:HG...	no	no	no	no
ENSG00000070785	3411	1553	1557	4	0	99.7431	1	EIF2B3	44850522	44986722	eukaryotic translati...	no	no	no	no
ENSG00000232369	492	2	2	0	0	100	1	PPIAP35	44988234	44988725	peptidylprolyl isome...	no	no	no	no
ENSG00000126107	5072	2072	2079	7	0	99.6633	1	HECTD3	45002540	45011324	HECT domain E3 ubiqu...	no	no	no	no
ENSG00000126088	4029	2756	2784	28	1	98.9943	1	UROD	45010950	45015575	uroporphyrinogen dec...	no	no	no	no
ENSG00000162415	6095	371	371	0	0	100	1	ZSWIM5	45016399	45306209	zinc finger SWIM-typ...	no	no	no	no
ENSG00000281912	1710	24	24	0	0	100	1	LINC01144	45303910	45305619	long intergenic non-...	no	no	no	no
ENSG00000186603	1785	694	694	0	0	100	1	HPDL	45326895	45328710	4-hydroxyphenylpyruv...	no	no	no	no
ENSG00000132781	5811	72	76	4	5	94.7368	1	MUTYH	45329163	45340893	mutY DNA glycosylase...	no	no	no	no
ENSG00000132773	2358	256	256	0	0	100	1	TOE1	45340052	45343973	target of EGR1, exon...	no	no	no	no
ENSG00000070759	3319	525	525	0	0	100	1	TESK2	45343883	45491163	testis associated ac...	no	no	no	no
ENSG00000280670	2757	142	142	0	0	100	1	CCDC163	45493866	45500079	CCDC163 homolog [Sou...	no	no	no	no
ENSG00000132763	5049	416	420	4	0	99.0476	1	MMACHC	45500300	45513382	metabolism of cobala...	no	no	no	no
ENSG00000117450	1504	28304	28320	16	0	99.9435	1	PRDX1	45510914	45542732	peroxiredoxin 1 [Sou...	no	no	no	no
ENSG00000117448	3121	8651	8707	56	0	99.3568	1	AKR1A1	45550543	45570049	aldo-keto reductase ...	no	no	no	no
ENSG00000281133	96	2	2	0	0	100	1		45580892	45580996		no	no	no	no
ENSG00000280836	99	4	4	0	0	100	1		45581219	45581321		no	no	no	no
ENSG00000132780	8304	58629	58785	156	0	99.7346	1	NASP	45583846	45618904	nuclear autoantigeni...	no	no	no	no
ENSG00000159588	3323	102	102	0	0	100	1	CCDC17	45620044	45624057	coiled-coil domain c...	no	no	no	no
ENSG00000159592	7433	9322	9358	36	0	99.6153	1	GPBP1L1	45627304	45688113	GC-rich promoter bin...	no	no	no	no
ENSG00000225447	382	49	49	0	0	100	1	RPS15AP10	45645816	45646197	ribosomal protein S1...	no	no	no	no
ENSG00000234329	788	29	29	0	0	100	1	RPL7AP16	45651039	45651826	ribosomal protein L7...	no	no	no	no
ENSG00000159596	1465	2804	2824	20	0	99.2918	1	TMEM69	45688181	45694436	transmembrane protei...	no	no	no	no
ENSG00000197429	3708	378	388	10	2	97.4227	1	IPP	45694324	45750653	intracisternal A par...	no	no	no	no
ENSG00000230896	598	8	8	0	0	100	1		45694684	45697075	novel transcript	no	no	no	no
ENSG00000086015	8062	4326	4412	86	1	98.0508	1	MAST2	45786987	46036122	microtubule associat...	no	no	no	no
ENSG00000232467	601	2	2	0	0	100	1	TMA16P2	45846994	45847594	translation machiner...	no	no	no	no
ENSG00000117461	7397	746	746	0	0	100	1	PIK3R3	46040140	46133036	phosphoinositide-3-k...	no	no	no	no
ENSG00000227857	339	1	1	0	0	100	1		46134531	46139081	novel transcript	no	no	no	no
ENSG00000117472	2370	2	2	0	0	100	1	TSPAN1	46175073	46185962	tetraspanin 1 [Sourc...	no	no	no	no
ENSG00000085998	6189	2170	2174	4	0	99.816	1	POMGNT1	46188683	46220305	protein O-linked man...	no	no	no	no
ENSG00000171357	1849	92	92	0	0	100	1	LURAP1	46203334	46221256	leucine rich adaptor...	no	no	no	no
ENSG00000085999	4078	2296	2361	65	2	97.2469	1	RAD54L	46246461	46278480	RAD54 like [Source:H...	no	no	no	no
ENSG00000132128	8606	3361	3361	0	0	100	1	LRRC41	46261196	46303616	leucine rich repeat ...	no	no	no	no
ENSG00000173660	1341	8762	8764	2	0	99.9772	1	UQCRH	46303698	46316776	ubiquinol-cytochrome...	no	no	no	no
ENSG00000117481	8468	1312	1312	0	0	100	1	NSUN4	46340789	46365152	NOP2/Sun RNA methylt...	no	no	no	no
ENSG00000225779	370	4	4	0	0	100	1		46370586	46370955	novel pseudogene	no	no	no	no
ENSG00000117480	2724	324	324	0	0	100	1	FAAH	46394317	46413848	fatty acid amide hyd...	no	no	no	no
ENSG00000232022	2476	44	44	0	0	100	1	FAAHP1	46432129	46445321	fatty acid amide hyd...	no	no	no	no
ENSG00000224863	1764	10	10	0	0	100	1	LINC01398	46446600	46451317	long intergenic non-...	no	no	no	no
ENSG00000197587	5068	2	2	0	0	100	1	DMBX1	46489836	46516216	diencephalon/mesence...	no	no	no	no
ENSG00000282881	1633	1	1	0	0	100	1	TMEM275	46532166	46543969	transmembrane protei...	no	no	no	no
ENSG00000269956	2530	36	36	0	0	100	1	MKNK1-AS1	46538611	46570255	MKNK1 antisense RNA ...	no	no	no	no
ENSG00000079277	8071	1075	1087	12	1	98.896	1	MKNK1	46557407	46616843	MAPK interacting ser...	no	no	no	no
ENSG00000142961	5916	240	240	0	0	100	1	MOB3C	46607719	46616811	MOB kinase activator...	no	no	no	no
ENSG00000123472	5677	3192	3208	16	0	99.5012	1	ATPAF1	46632737	46673867	ATP synthase mitocho...	no	no	no	no
ENSG00000186118	1464	6	6	0	0	100	1	TEX38	46668855	46673594	testis expressed 38 ...	no	no	no	no
ENSG00000159658	16312	4533	4549	16	0	99.6483	1	EFCAB14	46674659	46719146	EF-hand calcium bind...	no	no	no	no
ENSG00000154198	1598	8	8	0	0	100	1	CYP4Z2P	46843178	46900434	cytochrome P450 fami...	no	no	no	no
ENSG00000186377	2447	187	187	0	0	100	1	CYP4X1	47023669	47050751	cytochrome P450 fami...	no	no	no	no
ENSG00000186160	2252	42	42	0	0	100	1	CYP4Z1	47067231	47118318	cytochrome P450 fami...	no	no	no	no
ENSG00000225506	921	10	10	0	0	100	1	CYP4A22-AS1	47096653	47179271	CYP4A22 antisense RN...	no	no	no	no
ENSG00000225514	671	3	3	0	0	100	1	MTND1P34	47164510	47165920	MT-ND1 pseudogene 34...	no	no	no	no
ENSG00000123473	7291	2958	2958	0	0	100	1	STIL	47250139	47314892	STIL centriolar asse...	no	no	no	no
ENSG00000162368	3844	3157	3185	28	0	99.1209	1	CMPK1	47333790	47394866	cytidine/uridine mon...	no	no	no	no
ENSG00000237424	2509	10	10	0	0	100	1	FOXD2-AS1	47432133	47434641	FOXD2 adjacent oppos...	no	no	no	no
ENSG00000227947	1461	8	8	0	0	100	1	LINC01738	47688463	47704029	long intergenic non-...	no	no	no	no
ENSG00000269113	7524	500	508	8	1	98.4252	1	TRABD2B	47760528	47997385	TraB domain containi...	no	no	no	no
ENSG00000226133	1477	6	6	0	0	100	1	LINC02794	48050659	48091736	long intergenic non-...	no	no	no	no
ENSG00000242267	2010	14	14	0	0	100	1	SKINT1L	48161799	48179230	Skint1 like (pseudog...	no	no	no	no
ENSG00000223720	651	2	2	0	0	100	1		48172972	48206857	novel transcript	no	no	no	no
ENSG00000117834	4535	28	28	0	0	100	1	SLC5A9	48222685	48248644	solute carrier famil...	no	no	no	no
ENSG00000272491	1674	8	8	0	0	100	1		48227888	48229561	novel transcript, an...	no	no	no	no
ENSG00000132122	5938	1074	1082	8	0	99.2606	1	SPATA6	48295373	48472208	spermatogenesis asso...	no	no	no	no
ENSG00000235105	1257	5	5	0	0	100	1		48435967	48437223	amyotrophic lateral ...	no	no	no	no
ENSG00000186094	7504	4	4	0	0	100	1	AGBL4	48532854	50023954	AGBL carboxypeptidas...	no	no	no	no
ENSG00000162373	2142	349	353	4	1	98.8669	1	BEND5	48727519	48776969	BEN domain containin...	no	no	no	no
ENSG00000162374	8368	173	173	0	0	100	1	ELAVL4	50024029	50203772	ELAV like RNA bindin...	no	no	no	no
ENSG00000234080	877	6	6	0	0	100	1		50326131	50327007	ribosomal protein S2...	no	no	no	no
ENSG00000185104	7549	3143	3155	12	0	99.6197	1	FAF1	50437028	50960267	Fas associated facto...	no	no	no	no
ENSG00000225767	503	6	6	0	0	100	1	FAF1-AS1	50461469	50471150	FAF1 antisense RNA 1...	no	no	no	no
ENSG00000123091	3112	4159	4171	12	0	99.7123	1	RNF11	51236273	51273447	ring finger protein ...	no	no	no	no
ENSG00000233406	870	2	2	0	0	100	1		51250603	51251472	ribosomal protein S2...	no	no	no	no
ENSG00000085831	9362	350	350	0	0	100	1	TTC39A	51287258	51345116	tetratricopeptide re...	no	no	no	no
ENSG00000085832	7378	5522	5550	28	0	99.4955	1	EPS15	51354263	51519328	epidermal growth fac...	no	no	no	no
ENSG00000232027	955	3	3	0	0	100	1		51372270	51373224	proteasome (prosome,...	no	no	no	no
ENSG00000227070	476	5	5	0	0	100	1	EPS15-AS1	51518288	51561651	EPS15 antisense RNA ...	no	no	no	no
ENSG00000227742	2704	2	2	0	0	100	1	CALR4P	51561866	51594897	calreticulin 4, pseu...	no	no	no	no
ENSG00000117859	10273	5710	5758	48	0	99.1664	1	OSBPL9	51577179	51798427	oxysterol binding pr...	no	no	no	no
ENSG00000078618	6773	13968	14053	85	0	99.3951	1	NRDC	51789191	51878805	nardilysin convertas...	no	no	no	no
ENSG00000266993	1819	68	68	0	0	100	1		51793934	51799154	novel transcript, an...	no	no	no	no
ENSG00000272175	280	2	2	0	0	100	1		51801028	51801307	novel transcript, an...	no	no	no	no
ENSG00000169213	12780	8284	8318	34	0	99.5912	1	RAB3B	51907956	51990700	RAB3B, member RAS on...	no	no	no	no
ENSG00000200839	126	8	8	0	0	100	1	RNA5SP48	51973410	51973535	RNA, 5S ribosomal ps...	no	no	no	no
ENSG00000117862	2864	344	344	0	0	100	1	TXNDC12	52020131	52055191	thioredoxin domain c...	no	no	no	no
ENSG00000198841	1708	133	133	0	0	100	1	KTI12	52032103	52033810	KTI12 chromatin asso...	no	no	no	no
ENSG00000223390	762	4	4	0	0	100	1		52033391	52044279	novel transcript	no	no	no	no
ENSG00000134717	5948	7128	7312	184	2	97.4836	1	BTF3L4	52056199	52090716	basic transcription ...	no	no	no	no
ENSG00000157077	5809	3018	3018	0	0	100	1	ZFYVE9	52142089	52348671	zinc finger FYVE-typ...	no	no	no	no
ENSG00000228407	340	4	4	0	0	100	1		52160261	52160600	pseudogene similar t...	no	no	no	no
ENSG00000154222	7495	1078	1082	4	0	99.6303	1	CC2D1B	52345723	52366205	coiled-coil and C2 d...	no	no	no	no
ENSG00000224680	568	2	2	0	0	100	1	PLA2G12AP1	52368677	52369244	phospholipase A2 gro...	no	no	no	no
ENSG00000085840	3121	3630	3630	0	0	100	1	ORC1	52372829	52404423	origin recognition c...	no	no	no	no
ENSG00000134748	5617	4511	4511	0	0	100	1	PRPF38A	52404602	52420836	pre-mRNA processing ...	no	no	no	no
ENSG00000134744	16199	4632	4632	0	0	100	1	TUT4	52408282	52553487	terminal uridylyl tr...	no	no	no	no
ENSG00000272371	456	2	2	0	0	100	1		52554818	52555273	novel transcript	no	no	no	no
ENSG00000236290	703	2	2	0	0	100	1	EEF1GP7	52573114	52573816	eukaryotic translati...	no	no	no	no
ENSG00000116157	1692	300	300	0	0	100	1	GPX7	52602371	52609051	glutathione peroxida...	no	no	no	no
ENSG00000182183	2684	24	24	0	0	100	1	SHISAL2A	52633168	52669683	shisa like 2A [Sourc...	no	no	no	no
ENSG00000162377	4148	2530	2534	4	0	99.8421	1	COA7	52684449	52698347	cytochrome c oxidase...	no	no	no	no
ENSG00000162378	8206	2232	2240	8	0	99.6429	1	ZYG11B	52726453	52827336	zyg-11 family member...	no	no	no	no
ENSG00000228929	455	4	4	0	0	100	1	RPS13P2	52772194	52772648	ribosomal protein S1...	no	no	no	no
ENSG00000203995	4694	97	97	0	0	100	1	ZYG11A	52842511	52894998	zyg-11 family member...	no	no	no	no
ENSG00000242391	380	4	4	0	0	100	1		52881216	52881730	novel transcript, an...	no	no	no	no
ENSG00000121310	11572	1158	1164	6	0	99.4845	1	ECHDC2	52895910	52927212	enoyl-CoA hydratase ...	no	no	no	no
ENSG00000230953	175	13	13	0	0	100	1		52920422	52920596	translational machin...	no	no	no	no
ENSG00000231866	175	2	2	0	0	100	1		52925249	52925423	chromosome 14 open r...	no	no	no	no
ENSG00000116171	8253	2265	2269	4	0	99.8237	1	SCP2	52927276	53051698	sterol carrier prote...	no	no	no	no
ENSG00000174348	4899	8	8	0	0	100	1	PODN	53062052	53085501	podocan [Source:HGNC...	no	no	no	no
ENSG00000162383	5413	14	14	0	0	100	1	SLC1A7	53087179	53142638	solute carrier famil...	no	no	no	no
ENSG00000235563	1871	2	2	0	0	100	1		53114576	53118609	novel transcript	no	no	no	no
ENSG00000157184	10089	918	924	6	0	99.3506	1	CPT2	53196792	53214197	carnitine palmitoylt...	no	no	no	no
ENSG00000236723	1227	1	1	0	0	100	1		53209783	53213775	novel transcript, an...	no	no	no	no
ENSG00000162384	4504	1743	1743	0	0	100	1	CZIB	53214099	53220634	CXXC motif containin...	no	no	no	no
ENSG00000162385	1363	1327	1331	4	0	99.6995	1	MAGOH	53226900	53238518	mago homolog, exon j...	no	no	no	no
ENSG00000226754	1941	7	7	0	0	100	1	MAGOH-DT	53238550	53246482	MAGOH divergent tran...	no	no	no	no
ENSG00000157193	19668	8448	8468	20	0	99.7638	1	LRP8	53242364	53328469	LDL receptor related...	no	no	no	no
ENSG00000232762	752	18	18	0	0	100	1		53304536	53307462	novel transcript	no	no	no	no
ENSG00000225675	567	64	64	0	0	100	1	LRP8-DT	53328233	53336509	LRP8 divergent trans...	no	no	no	no
ENSG00000236253	3164	14	14	0	0	100	1	SLC25A3P1	53413149	53440020	solute carrier famil...	no	no	no	no
ENSG00000143006	2440	16	16	0	0	100	1	DMRTB1	53459399	53467488	DMRT like family B w...	no	no	no	no
ENSG00000174332	3113	38	38	0	0	100	1	GLIS1	53506237	53739164	GLIS family zinc fin...	no	no	no	no
ENSG00000058804	4720	7697	7773	76	0	99.0223	1	NDC1	53765478	53838463	NDC1 transmembrane n...	no	no	no	no
ENSG00000058799	2036	1023	1027	4	0	99.6105	1	YIPF1	53851719	53889798	Yip1 domain family m...	no	no	no	no
ENSG00000081870	3236	928	932	4	0	99.5708	1	HSPB11	53916574	53945699	heat shock protein f...	no	no	no	no
ENSG00000116212	2164	2449	2453	4	0	99.8369	1	LRRC42	53946085	53968168	leucine rich repeat ...	no	no	no	no
ENSG00000219102	1063	1	1	0	0	100	1	HNRNPA3P12	53974969	53976031	heterogeneous nuclea...	no	no	no	no
ENSG00000116209	9149	3736	3740	4	0	99.893	1	TMEM59	54026681	54053504	transmembrane protei...	no	no	no	no
ENSG00000280378	1755	15	15	0	0	100	1		54033126	54034880	TEC	no	no	no	no
ENSG00000116205	12168	1286	1286	0	0	100	1	TCEANC2	54053584	54112519	transcription elonga...	no	no	no	no
ENSG00000280425	4969	5	5	0	0	100	1		54137746	54142980	novel transcript, an...	no	no	no	no
ENSG00000215883	8926	875	879	4	0	99.5449	1	CYB5RL	54169651	54200036	cytochrome b5 reduct...	no	no	no	no
ENSG00000116221	2549	6827	6831	4	0	99.9414	1	MRPL37	54184041	54225464	mitochondrial riboso...	no	no	no	no
ENSG00000157216	5227	7477	7599	122	1	98.3945	1	SSBP3	54225432	54413479	single stranded DNA ...	no	no	no	no
ENSG00000198711	2624	87	87	0	0	100	1	SSBP3-AS1	54236440	54239063	SSBP3 antisense RNA ...	no	no	no	no
ENSG00000162390	9768	382	382	0	0	100	1	ACOT11	54542257	54639192	acyl-CoA thioesteras...	no	no	no	no
ENSG00000162391	2006	10	10	0	0	100	1	FAM151A	54609181	54623556	family with sequence...	no	no	no	no
ENSG00000184313	9088	29	29	0	0	100	1	MROH7	54641754	54710266	maestro heat like re...	no	no	no	no
ENSG00000243725	3488	35	35	0	0	100	1	TTC4	54715861	54742657	tetratricopeptide re...	no	no	no	no
ENSG00000162396	2356	678	678	0	0	100	1	PARS2	54756898	54764523	prolyl-tRNA syntheta...	no	no	no	no
ENSG00000006555	6111	96	96	0	0	100	1	TTC22	54779712	54801323	tetratricopeptide re...	no	no	no	no
ENSG00000162398	1777	16	16	0	0	100	1	LEXM	54806063	54842252	lymphocyte expansion...	no	no	no	no
ENSG00000116133	6214	25613	25681	68	0	99.7352	1	DHCR24	54849627	54887195	24-dehydrocholestero...	no	no	no	no
ENSG00000233203	765	14	14	0	0	100	1	DHCR24-DT	54887563	54888850	DHCR24 divergent tra...	no	no	no	no
ENSG00000284601	1733	8	8	0	0	100	1		54974900	54980464	novel transcript	no	no	no	no
ENSG00000143001	1256	6	6	0	0	100	1	TMEM61	54980628	54992288	transmembrane protei...	no	no	no	no
ENSG00000162399	9761	46	46	0	0	100	1	BSND	54998933	55017172	barttin CLCNK type a...	no	no	no	no
ENSG00000169174	5711	5666	5710	44	0	99.2294	1	PCSK9	55039447	55064852	proprotein convertas...	no	no	no	no
ENSG00000162402	12023	8444	8472	28	0	99.6695	1	USP24	55066359	55215378	ubiquitin specific p...	no	no	no	no
ENSG00000231090	2568	4	4	0	0	100	1	MIR4422HG	55217645	55324691	MIR4422 host gene [S...	no	no	no	no
ENSG00000231095	994	13	13	0	0	100	1	GYG1P3	55222379	55223372	glycogenin 1 pseudog...	no	no	no	no
ENSG00000260971	7878	12	12	0	0	100	1		56154545	56477687	novel transcript	no	no	no	no
ENSG00000284686	2655	7	7	0	0	100	1		56173433	56524495	novel transcript	no	no	no	no
ENSG00000223956	2203	4	4	0	0	100	1	LINC01767	56414918	56417137	long intergenic non-...	no	no	no	no
ENSG00000162407	5272	1408	1408	0	0	100	1	PLPP3	56494761	56645301	phospholipid phospha...	no	no	no	no
ENSG00000162409	9362	2484	2488	4	0	99.8392	1	PRKAA2	56645314	56715335	protein kinase AMP-a...	no	no	no	no
ENSG00000187889	4648	1	1	0	0	100	1	FYB2	56718789	56819696	FYN binding protein ...	no	no	no	no
ENSG00000173406	7548	777	777	0	0	100	1	DAB1	56994778	58546734	DAB adaptor protein ...	no	no	no	no
ENSG00000227935	708	9	9	0	0	100	1		57386576	57387450	novel transcript	no	no	no	no
ENSG00000229887	1447	2	2	0	0	100	1	HNRNPA1P6	58048175	58049291	heterogeneous nuclea...	no	no	no	no
ENSG00000162600	3718	613	613	0	0	100	1	OMA1	58415384	58546802	OMA1 zinc metallopep...	no	no	no	no
ENSG00000286918	1791	11	11	0	0	100	1		58546168	58563897	novel transcript, an...	no	no	no	no
ENSG00000184292	1820	89	89	0	0	100	1	TACSTD2	58575433	58577252	tumor associated cal...	no	no	no	no
ENSG00000185839	690	7	25	18	72	28	1		58630841	58631530	adenylate kinase 2 (...	no	no	no	no
ENSG00000162601	13115	10655	10925	270	2	97.5286	1	MYSM1	58643440	58700090	Myb like, SWIRM and ...	no	no	no	no
ENSG00000177606	3257	2343	2343	0	0	100	1	JUN	58776845	58784048	Jun proto-oncogene, ...	no	no	no	no
ENSG00000234807	5017	28	28	0	0	100	1	LINC01135	58784384	58901109	long intergenic non-...	no	no	no	no
ENSG00000272226	535	10	10	0	0	100	1		58812808	58813342	novel transcript	no	no	no	no
ENSG00000231740	395	1	1	0	0	100	1		58838448	58851254	novel transcript	no	no	no	no
ENSG00000232453	2068	10	10	0	0	100	1	LINC02777	58882868	58931897	long intergenic non-...	no	no	no	no
ENSG00000237352	8462	2	2	0	0	100	1	LINC01358	58933643	59240555	long intergenic non-...	no	no	no	no
ENSG00000241042	171	1	1	0	0	100	1		59054397	59056049	novel transcript	no	no	no	no
ENSG00000235215	317	40	40	0	0	100	1		59055999	59078116	novel transcript	no	no	no	no
ENSG00000224609	7581	58	58	0	0	100	1	FGGY-DT	59131932	59296491	FGGY divergent trans...	no	no	no	no
ENSG00000172456	12174	350	350	0	0	100	1	FGGY	59296638	59810647	FGGY carbohydrate ki...	no	no	no	no
ENSG00000226883	767	10	10	0	0	100	1		59754747	59789182	novel transcript	no	no	no	no
ENSG00000134709	6614	4528	4544	16	0	99.6479	1	HOOK1	59814786	59876322	hook microtubule tet...	no	no	no	no
ENSG00000134716	2973	128	128	0	0	100	1	CYP2J2	59893308	59926773	cytochrome P450 fami...	no	no	no	no
ENSG00000162598	4422	32	32	0	0	100	1	C1orf87	59987269	60073770	chromosome 1 open re...	no	no	no	no
ENSG00000226476	15496	78	78	0	0	100	1	LINC01748	60515716	60640507	long intergenic non-...	no	no	no	no
ENSG00000162599	55886	148	148	0	0	100	1	NFIA	60865259	61462788	nuclear factor I A [...	no	no	no	no
ENSG00000237928	6214	1	1	0	0	100	1	NFIA-AS2	60912675	61056885	NFIA antisense RNA 2...	no	no	no	no
ENSG00000162604	5516	800	800	0	0	100	1	TM2D1	61681046	61725423	TM2 domain containin...	no	no	no	no
ENSG00000132849	11919	4823	4833	10	0	99.7931	1	PATJ	61742477	62178675	PATJ crumbs cell pol...	no	no	no	no
ENSG00000240563	3831	37240	37344	104	0	99.7215	1	L1TD1	62194849	62212328	LINE1 type transposa...	no	no	no	no
ENSG00000237227	307	33	55	22	40	60	1		62208136	62208442	ribosomal protein L3...	no	no	no	no
ENSG00000132854	6814	26	26	0	0	100	1	KANK4	62236165	62319434	KN motif and ankyrin...	no	no	no	no
ENSG00000162607	3869	4930	4938	8	0	99.838	1	USP1	62436297	62451804	ubiquitin specific p...	no	no	no	no
ENSG00000116641	24890	3251	3259	8	0	99.7545	1	DOCK7	62454298	62688386	dedicator of cytokin...	no	no	no	no
ENSG00000132855	3371	7	7	0	0	100	1	ANGPTL3	62597520	62606313	angiopoietin like 3 ...	no	no	no	no
ENSG00000235545	1228	38	38	0	0	100	1	DOCK7-DT	62688482	62710694	DOCK7 divergent tran...	no	no	no	no
ENSG00000125703	3116	1452	1452	0	0	100	1	ATG4C	62784132	62865516	autophagy related 4C...	no	no	no	no
ENSG00000224209	7361	21	21	0	0	100	1	LINC00466	63159083	63317274	long intergenic non-...	no	no	no	no
ENSG00000230798	1208	3305	3351	46	1	98.6273	1	FOXD3-AS1	63320878	63324441	FOXD3 antisense RNA ...	no	no	no	no
ENSG00000187140	2562	893	901	8	0	99.1121	1	FOXD3	63322567	63325128	forkhead box D3 [Sou...	no	no	no	no
ENSG00000088035	5487	1489	1489	0	0	100	1	ALG6	63367575	63438553	ALG6 alpha-1,3-gluco...	no	no	no	no
ENSG00000142856	5459	2037	2037	0	0	100	1	ITGB3BP	63440770	63593721	integrin subunit bet...	no	no	no	no
ENSG00000286429	1206	2	2	0	0	100	1		63487957	63508204	novel transcript, an...	no	no	no	no
ENSG00000203965	5704	279	279	0	0	100	1	EFCAB7	63523372	63572693	EF-hand calcium bind...	no	no	no	no
ENSG00000116652	3555	41	41	0	0	100	1	DLEU2L	63547082	63550636	deleted in lymphocyt...	no	no	no	no
ENSG00000079739	4077	3824	3844	20	0	99.4797	1	PGM1	63593411	63660245	phosphoglucomutase 1...	no	no	no	no
ENSG00000244256	305	10	10	0	0	100	1	RN7SL130P	63655743	63656047	RNA, 7SL, cytoplasmi...	no	no	no	no
ENSG00000185483	6720	7174	7206	32	0	99.5559	1	ROR1	63774017	64181498	receptor tyrosine ki...	no	no	no	no
ENSG00000177414	1838	5	5	0	0	100	1	UBE2U	64203623	64267368	ubiquitin conjugatin...	no	no	no	no
ENSG00000158966	7022	2843	2847	4	0	99.8595	1	CACHD1	64470129	64693058	cache domain contain...	no	no	no	no
ENSG00000162437	6070	2315	2315	0	0	100	1	RAVER2	64745075	64833232	ribonucleoprotein, P...	no	no	no	no
ENSG00000162434	12620	5167	5185	18	0	99.6528	1	JAK1	64833223	65067754	Janus kinase 1 [Sour...	no	no	no	no
ENSG00000226891	7863	65	67	2	2	97.0149	1	LINC01359	64972225	65002489	long intergenic non-...	no	no	no	no
ENSG00000185031	1480	17	17	0	0	100	1	SLC2A3P2	64984608	64986087	solute carrier famil...	no	no	no	no
ENSG00000272506	618	4	4	0	0	100	1		65003470	65004087	novel transcript	no	no	no	no
ENSG00000212257	107	1	1	0	0	100	1	RNU6-1176P	65022968	65023074	RNA, U6 small nuclea...	no	no	no	no
ENSG00000265996	88	17	17	0	0	100	1	MIR3671	65057755	65057842	microRNA 3671 [Sourc...	no	no	no	no
ENSG00000162433	7578	11455	13277	1822	13	86.277	1	AK4	65147549	65232145	adenylate kinase 4 [...	no	no	no	no
ENSG00000116675	6958	570	570	0	0	100	1	DNAJC6	65248219	65415871	DnaJ heat shock prot...	no	no	no	no
ENSG00000213625	5237	1773	1777	4	0	99.7749	1	LEPROT	65420587	65436007	leptin receptor over...	no	no	no	no
ENSG00000116678	11370	1082	1082	0	0	100	1	LEPR	65420652	65641559	leptin receptor [Sou...	no	no	no	no
ENSG00000237852	423	5	5	0	0	100	1		65486406	65494188	novel transcript	no	no	no	no
ENSG00000184588	8930	292	292	0	0	100	1	PDE4B	65792514	66374579	phosphodiesterase 4B...	no	no	no	no
ENSG00000118473	13320	51	51	0	0	100	1	SGIP1	66533267	66751139	SH3GL interacting en...	no	no	no	no
ENSG00000248458	1156	10	10	0	0	100	1		66665864	66677027	novel transcript, an...	no	no	no	no
ENSG00000152760	3360	104	104	0	0	100	1	DYNLT5	66752459	66779047	dynein light chain T...	no	no	no	no
ENSG00000152763	6673	62	62	0	0	100	1	DNAI4	66812885	66924856	dynein axonemal inte...	no	no	no	no
ENSG00000198160	8273	3129	3147	18	0	99.428	1	MIER1	66924895	66988619	MIER1 transcriptiona...	no	no	no	no
ENSG00000116704	6193	490	490	0	0	100	1	SLC35D1	66999350	67054148	solute carrier famil...	no	no	no	no
ENSG00000081985	6067	93	97	4	4	95.8763	1	IL12RB2	67307364	67398724	interleukin 12 recep...	no	no	no	no
ENSG00000142864	7676	64528	65000	472	0	99.2738	1	SERBP1	67407810	67430415	SERPINE1 mRNA bindin...	no	no	no	no
ENSG00000223263	105	21	21	0	0	100	1	RNU6-387P	67417214	67417318	RNA, U6 small nuclea...	no	no	no	no
ENSG00000116717	1925	2026	2026	0	0	100	1	GADD45A	67685201	67688334	growth arrest and DN...	no	no	no	no
ENSG00000172380	4715	4881	4905	24	0	99.5107	1	GNG12	67701475	67833467	G protein subunit ga...	no	no	no	no
ENSG00000232284	3465	17	17	0	0	100	1	GNG12-AS1	67832293	68202987	GNG12, DIRAS3 and WL...	no	no	no	no
ENSG00000116729	4459	96	96	0	0	100	1	WLS	68098473	68233120	Wnt ligand secretion...	no	no	no	no
ENSG00000024526	5904	5140	5153	13	0	99.7477	1	DEPDC1	68474152	68497221	DEP domain containin...	no	no	no	no
ENSG00000233589	960	112	112	0	0	100	1		68479129	68483539	novel transcript	no	no	no	no
ENSG00000234264	1247	2	2	0	0	100	1	DEPDC1-AS1	68496676	68538627	DEPDC1 antisense RNA...	no	no	no	no
ENSG00000285407	2810	50	50	0	0	100	1		68679202	68943452	novel transcript	no	no	no	no
ENSG00000285473	716	6	6	0	0	100	1		68974010	69023558	novel transcript	no	no	no	no
ENSG00000033122	30043	243	243	0	0	100	1	LRRC7	69567922	70151945	leucine rich repeat ...	no	no	no	no
ENSG00000066557	2843	3454	3454	0	0	100	1	LRRC40	70144805	70205579	leucine rich repeat ...	no	no	no	no
ENSG00000116754	8473	19984	20016	32	0	99.8401	1	SRSF11	70205682	70253052	serine and arginine ...	no	no	no	no
ENSG00000118454	6184	2214	2234	20	0	99.1047	1	ANKRD13C	70258999	70354734	ankyrin repeat domai...	no	no	no	no
ENSG00000197568	1222	455	459	4	0	99.1285	1	HHLA3	70354786	70385339	HERV-H LTR-associati...	no	no	no	no
ENSG00000226088	575	17	17	0	0	100	1	HHLA3-AS1	70359562	70360437	HHLA3 antisense RNA ...	no	no	no	no
ENSG00000116761	2414	1472	1472	0	0	100	1	CTH	70411218	70439851	cystathionine gamma-...	no	no	no	no
ENSG00000271992	466	59	59	0	0	100	1		70445071	70445536	novel transcript	no	no	no	no
ENSG00000050628	9653	143	143	0	0	100	1	PTGER3	70852353	71047816	prostaglandin E rece...	no	no	no	no
ENSG00000235079	967	6	6	0	0	100	1	ZRANB2-AS1	71048855	71067184	ZRANB2 antisense RNA...	no	no	no	no
ENSG00000132485	4985	9177	9179	2	0	99.9782	1	ZRANB2	71063291	71081289	zinc finger RANBP2-t...	no	no	no	no
ENSG00000207721	86	72	72	0	0	100	1	MIR186	71067631	71067716	microRNA 186 [Source...	no	no	no	no
ENSG00000229956	14877	6	6	0	0	100	1	ZRANB2-DT	71081324	71489976	ZRANB2 divergent tra...	no	no	no	no
ENSG00000172260	13208	271	271	0	0	100	1	NEGR1	71395943	72282539	neuronal growth regu...	no	no	no	no
ENSG00000233994	608	2	2	0	0	100	1	GDI2P2	72274552	72275159	GDP dissociation inh...	no	no	no	no
ENSG00000286863	6418	33	33	0	0	100	1		72283170	72753772	novel transcript	no	no	no	no
ENSG00000225087	2896	19	19	0	0	100	1		72636547	72899240	novel transcript	no	no	no	no
ENSG00000285808	1065	1	1	0	0	100	1	LINC02797	72793104	72854475	long intergenic non-...	no	no	no	no
ENSG00000162620	8759	192	192	0	0	100	1	LRRIQ3	74026015	74198187	leucine rich repeats...	no	no	no	no
ENSG00000254685	4180	236	236	0	0	100	1	FPGT	74198238	74234086	fucose-1-phosphate g...	no	no	no	no
ENSG00000259030	9896	60	60	0	0	100	1	FPGT-TNNI3K	74198235	74544393	FPGT-TNNI3K readthro...	no	no	no	no
ENSG00000162621	3859	10	10	0	0	100	1	LRRC53	74469376	74512611	leucine rich repeat ...	no	no	no	no
ENSG00000116791	4085	2987	2987	0	0	100	1	CRYZ	74705482	74733408	crystallin zeta [Sou...	no	no	no	no
ENSG00000162623	4616	2314	2322	8	0	99.6555	1	TYW3	74733152	74766678	tRNA-yW synthesizing...	no	no	no	no
ENSG00000162624	3977	126	126	0	0	100	1	LHX8	75128434	75161533	LIM homeobox 8 [Sour...	no	no	no	no
ENSG00000137968	6299	1026	1026	0	0	100	1	SLC44A5	75202129	75611114	solute carrier famil...	no	no	no	no
ENSG00000230863	2159	9	9	0	0	100	1		75641178	75724049	histidine acid phosp...	no	no	no	no
ENSG00000117054	4783	2447	2463	16	0	99.3504	1	ACADM	75724431	75787575	acyl-CoA dehydrogena...	no	no	no	no
ENSG00000181227	1354	16	16	0	0	100	1	DLSTP1	75743423	75744776	dihydrolipoamide S-s...	no	no	no	no
ENSG00000137955	5920	5082	5110	28	0	99.4521	1	RABGGTB	75786197	75795086	Rab geranylgeranyltr...	no	no	no	no
ENSG00000057468	3270	81	81	0	0	100	1	MSH4	75796882	75913242	mutS homolog 4 [Sour...	no	no	no	no
ENSG00000184005	7212	1802	1810	8	0	99.558	1	ST6GALNAC3	76074746	76634603	ST6 N-acetylgalactos...	no	no	no	no
ENSG00000226415	750	36	46	10	21	78.2609	1	TPI1P1	76699789	76700538	triosephosphate isom...	no	no	no	no
ENSG00000117069	6059	475	479	4	0	99.1649	1	ST6GALNAC5	76867480	77067546	ST6 N-acetylgalactos...	no	no	no	no
ENSG00000276081	60	4	4	0	0	100	1	MIR7156	77060143	77060202	microRNA 7156 [Sourc...	no	no	no	no
ENSG00000288543	497	5	5	0	0	100	1		77067920	77078482	novel transcript	no	no	no	no
ENSG00000230498	2086	16	16	0	0	100	1		77081984	77086402	novel transcript	no	no	no	no
ENSG00000142892	5514	1532	1540	8	0	99.4805	1	PIGK	77088989	77219430	phosphatidylinositol...	no	no	no	no
ENSG00000226084	555	106	1252	1146	91	8.46645	1		77129114	77129668	ribosomal protein L1...	no	no	no	no
ENSG00000228187	571	4	4	0	0	100	1		77194825	77195395	novel pseudogene	no	no	no	no
ENSG00000287870	1211	5	5	0	0	100	1		77248633	77250826	novel transcript	no	no	no	no
ENSG00000154027	6948	499	499	0	0	100	1	AK5	77282019	77559966	adenylate kinase 5 [...	no	no	no	no
ENSG00000036549	9008	4216	4216	0	0	100	1	ZZZ3	77562416	77683419	zinc finger ZZ-type ...	no	no	no	no
ENSG00000077254	6918	5151	5177	26	0	99.4978	1	USP33	77695987	77759852	ubiquitin specific p...	no	no	no	no
ENSG00000180488	10128	1179	1179	0	0	100	1	MIGA1	77779624	77879540	mitoguardin 1 [Sourc...	no	no	no	no
ENSG00000219201	921	119	246	127	51	48.374	1		77810861	77811781	novel pseudogene	no	no	no	no
ENSG00000235927	2292	48	48	0	0	100	1	NEXN-AS1	77881348	77889539	NEXN antisense RNA 1...	no	no	no	no
ENSG00000162614	4436	558	558	0	0	100	1	NEXN	77888513	77943895	nexilin F-actin bind...	no	no	no	no
ENSG00000162613	7559	20223	20267	44	0	99.7829	1	FUBP1	77944055	77979110	far upstream element...	no	no	no	no
ENSG00000162616	3702	1632	1686	54	3	96.7972	1	DNAJB4	77979175	78017964	DnaJ heat shock prot...	no	no	no	no
ENSG00000137960	3904	88	88	0	0	100	1	GIPC2	77979542	78138444	GIPC PDZ domain cont...	no	no	no	no
ENSG00000273338	209	130	130	0	0	100	1		78004346	78004554	novel transcript, an...	no	no	no	no
ENSG00000285928	1795	6	6	0	0	100	1		78022565	78024861	novel transcript	no	no	no	no
ENSG00000122420	5764	8	8	0	0	100	1	PTGFR	78303884	78540701	prostaglandin F rece...	no	no	no	no
ENSG00000162618	5798	128	128	0	0	100	1	ADGRL4	78889764	79282124	adhesion G protein-c...	no	no	no	no
ENSG00000230787	1111	3	3	0	0	100	1	PSAT1P3	79054945	79056055	phosphoserine aminot...	no	no	no	no
ENSG00000117114	22649	9991	10001	10	0	99.9	1	ADGRL2	81306147	81993932	adhesion G protein-c...	no	no	no	no
ENSG00000227288	1675	4	50	46	92	8	1	ARID3BP1	81501794	81503468	ARID3B pseudogene 1 ...	no	no	no	no
ENSG00000233290	7213	33	33	0	0	100	1		82212413	82848205	novel transcript	no	no	no	no
ENSG00000230817	2155	2	2	0	0	100	1	LINC01362	82903183	83166815	long intergenic non-...	no	no	no	no
ENSG00000236268	4746	6	6	0	0	100	1	LINC01361	82970820	82986208	long intergenic non-...	no	no	no	no
ENSG00000233008	12430	3	3	0	0	100	1	LINC01725	83575776	83861053	long intergenic non-...	no	no	no	no
ENSG00000137941	10547	503	511	8	1	98.4344	1	TTLL7	83865024	83999150	tubulin tyrosine lig...	no	no	no	no
ENSG00000233061	2921	2	2	0	0	100	1	TTLL7-IT1	83979118	83984300	TTLL7 intronic trans...	no	no	no	no
ENSG00000271576	1601	174	174	0	0	100	1	PRKACB-DT	84076331	84077961	PRKACB divergent tra...	no	no	no	no
ENSG00000142875	6730	1939	1947	8	0	99.5891	1	PRKACB	84078062	84238498	protein kinase cAMP-...	no	no	no	no
ENSG00000226970	244	3	3	0	0	100	1	NEDD8P1	84244334	84244577	NEDD8 pseudogene 1 [...	no	no	no	no
ENSG00000203943	3405	91	91	0	0	100	1	SAMD13	84298366	84389957	sterile alpha motif ...	no	no	no	no
ENSG00000240520	2412	2	2	0	0	100	1	UOX	84363706	84397831	urate oxidase (pseud...	no	no	no	no
ENSG00000117133	2290	2454	2454	0	0	100	1	RPF1	84479259	84498352	ribosome production ...	no	no	no	no
ENSG00000174021	1128	313	317	4	1	98.7382	1	GNG5	84498323	84506581	G protein subunit ga...	no	no	no	no
ENSG00000285851	2686	4	4	0	0	100	1		84498350	84556688	novel transcript	no	no	no	no
ENSG00000122432	4280	34	34	0	0	100	1	SPATA1	84506300	84567379	spermatogenesis asso...	no	no	no	no
ENSG00000117151	6934	87	87	0	0	100	1	CTBS	84549611	84574480	chitobiase [Source:H...	no	no	no	no
ENSG00000117155	8639	2206	2246	40	1	98.2191	1	SSX2IP	84643706	84690803	SSX family member 2 ...	no	no	no	no
ENSG00000171517	3536	885	893	8	0	99.1041	1	LPAR3	84811602	84893206	lysophosphatidic aci...	no	no	no	no
ENSG00000153898	3442	325	325	0	0	100	1	MCOLN2	84925583	84997113	mucolipin TRP cation...	no	no	no	no
ENSG00000162643	3923	22	22	0	0	100	1	DNAI3	84999147	85133138	dynein axonemal inte...	no	no	no	no
ENSG00000055732	6624	182	182	0	0	100	1	MCOLN3	85018082	85048500	mucolipin TRP cation...	no	no	no	no
ENSG00000266110	80	1	1	0	0	100	1	MIR4423	85133794	85133873	microRNA 4423 [Sourc...	no	no	no	no
ENSG00000280099	1717	203	203	0	0	100	1		85152487	85154203	TEC	no	no	no	no
ENSG00000097096	6405	1190	1190	0	0	100	1	SYDE2	85156889	85201724	synapse defective Rh...	no	no	no	no
ENSG00000162642	3420	1856	1862	6	0	99.6778	1	C1orf52	85249953	85259672	chromosome 1 open re...	no	no	no	no
ENSG00000142867	4346	930	930	0	0	100	1	BCL10	85265776	85276632	BCL10 immune signali...	no	no	no	no
ENSG00000223653	4769	34	34	0	0	100	1	BCL10-AS1	85276388	85448124	BCL10 antisense RNA ...	no	no	no	no
ENSG00000153904	4587	3610	3654	44	1	98.7958	1	DDAH1	85318481	85578363	dimethylarginine dim...	no	no	no	no
ENSG00000282057	3607	94	94	0	0	100	1		85482281	85578250	novel transcript	no	no	no	no
ENSG00000142871	3698	10567	10579	12	0	99.8866	1	CCN1	85580761	85584589	cellular communicati...	no	no	no	no
ENSG00000117174	6203	1525	1533	8	0	99.4781	1	ZNHIT6	85649417	85708433	zinc finger HIT-type...	no	no	no	no
ENSG00000171502	9568	196	196	0	0	100	1	COL24A1	85729233	86156943	collagen type XXIV a...	no	no	no	no
ENSG00000285210	2885	13	13	0	0	100	1	LINC02795	86288704	86320711	long intergenic non-...	no	no	no	no
ENSG00000122417	10898	2752	2756	4	0	99.8549	1	ODF2L	86346824	86396342	outer dense fiber of...	no	no	no	no
ENSG00000137975	4406	2	2	0	0	100	1	CLCA2	86424171	86456553	chloride channel acc...	no	no	no	no
ENSG00000016602	3447	13	13	0	0	100	1	CLCA4	86547078	86580754	chloride channel acc...	no	no	no	no
ENSG00000236915	2738	26	26	0	0	100	1	CLCA4-AS1	86569024	86704484	CLCA4 antisense RNA ...	no	no	no	no
ENSG00000261737	961	39	39	0	0	100	1	CLCA4-AS1	86703502	86704462	lncRNA	no	no	no	no
ENSG00000097033	6881	4495	4499	4	0	99.9111	1	SH3GLB1	86704570	86748184	SH3 domain containin...	no	no	no	no
ENSG00000183291	2201	4065	4081	16	0	99.6079	1	SELENOF	86862445	86914424	selenoprotein F [Sou...	no	no	no	no
ENSG00000153936	7426	2427	2427	0	0	100	1	HS2ST1	86914635	87109982	heparan sulfate 2-O-...	no	no	no	no
ENSG00000267272	6717	201	201	0	0	100	1	LINC01140	87129765	87169198	long intergenic non-...	no	no	no	no
ENSG00000143013	5421	4329	4397	68	1	98.4535	1	LMO4	87328880	87348923	LIM domain only 4 [S...	no	no	no	no
ENSG00000237505	16635	5	5	0	0	100	1	PKN2-AS1	87620803	88685204	PKN2 antisense RNA 1...	no	no	no	no
ENSG00000286758	599	2	2	0	0	100	1		88462936	88464079	novel transcript	no	no	no	no
ENSG00000274321	171	6	6	0	0	100	1		88520000	88520170		no	no	no	no
ENSG00000065243	6897	4534	4582	48	1	98.9524	1	PKN2	88684222	88836255	protein kinase N2 [S...	no	no	no	no
ENSG00000207234	107	10	10	0	0	100	1	RNU6-125P	88816779	88816885	RNA, U6 small nuclea...	no	no	no	no
ENSG00000241975	318	28	28	0	0	100	1	ELOCP19	88829102	88829419	elongin C pseudogene...	no	no	no	no
ENSG00000137947	2524	781	781	0	0	100	1	GTF2B	88852633	88891944	general transcriptio...	no	no	no	no
ENSG00000137944	2196	3059	3067	8	0	99.7392	1	KYAT3	88935773	88992953	kynurenine aminotran...	no	no	no	no
ENSG00000213516	5087	1518	1522	4	0	99.7372	1	RBMXL1	88979456	88992960	RBMX like 1 [Source:...	no	no	no	no
ENSG00000117226	4284	2	2	0	0	100	1	GBP3	89006679	89022894	guanylate binding pr...	no	no	no	no
ENSG00000234518	483	4	4	0	0	100	1	PTGES3P1	89104285	89104767	prostaglandin E synt...	no	no	no	no
ENSG00000162645	7223	2	2	0	0	100	1	GBP2	89106132	89150456	guanylate binding pr...	no	no	no	no
ENSG00000162654	6141	34	34	0	0	100	1	GBP4	89181144	89198942	guanylate binding pr...	no	no	no	no
ENSG00000225492	2352	9	9	0	0	100	1	GBP1P1	89410319	89426243	guanylate binding pr...	no	no	no	no
ENSG00000286548	6245	21	21	0	0	100	1		89427533	89525472	novel transcript, an...	no	no	no	no
ENSG00000197147	8270	2680	2696	16	0	99.4065	1	LRRC8B	89524829	89597861	leucine rich repeat ...	no	no	no	no
ENSG00000231999	11975	49	49	0	0	100	1	LRRC8C-DT	89581291	89633003	LRRC8C divergent tra...	no	no	no	no
ENSG00000171488	11724	436	436	0	0	100	1	LRRC8C	89633072	89769903	leucine rich repeat ...	no	no	no	no
ENSG00000231613	509	3	3	0	0	100	1		89788914	89790492	novel transcript	no	no	no	no
ENSG00000272931	695	36	36	0	0	100	1	LRRC8D-DT	89820174	89820868	LRRC8D divergent tra...	no	no	no	no
ENSG00000171492	4852	3208	3252	44	1	98.647	1	LRRC8D	89821014	89936611	leucine rich repeat ...	no	no	no	no
ENSG00000252797	232	6	6	0	0	100	1	RN7SKP272	89987713	89987944	RN7SK pseudogene 272...	no	no	no	no
ENSG00000228175	729	90	90	0	0	100	1	GEMIN8P4	89993593	89994321	gem nuclear organell...	no	no	no	no
ENSG00000162664	10988	4087	4107	20	0	99.513	1	ZNF326	89995110	90035533	zinc finger protein ...	no	no	no	no
ENSG00000287406	968	91	91	0	0	100	1		90242088	90284188	novel transcript	no	no	no	no
ENSG00000212459	104	4	4	0	0	100	1	RNU6-695P	90253456	90253559	RNA, U6 small nuclea...	no	no	no	no
ENSG00000287372	4336	2	2	0	0	100	1		90388193	90420396	novel transcript	no	no	no	no
ENSG00000233593	14354	21	21	0	0	100	1	LINC02609	90769086	90851671	long intergenic non-...	no	no	no	no
ENSG00000225446	1842	2	2	0	0	100	1	LINC01763	90851122	90855253	long intergenic non-...	no	no	no	no
ENSG00000122482	7604	5693	5729	36	0	99.3716	1	ZNF644	90915298	91022272	zinc finger protein ...	no	no	no	no
ENSG00000232393	886	1	1	0	0	100	1	RPL5P6	91023919	91024804	ribosomal protein L5...	no	no	no	no
ENSG00000162669	5814	203	203	0	0	100	1	HFM1	91260766	91404856	helicase for meiosis...	no	no	no	no
ENSG00000206817	100	1	1	0	0	100	1		91261625	91261724	Y RNA [Source:RFAM;A...	no	no	no	no
ENSG00000097046	3599	4432	4432	0	0	100	1	CDC7	91500851	91525764	cell division cycle ...	no	no	no	no
ENSG00000203914	1567	6	6	0	0	100	1	HSP90B3P	91642516	91644082	heat shock protein 9...	no	no	no	no
ENSG00000069702	8577	236	236	0	0	100	1	TGFBR3	91680343	91906335	transforming growth ...	no	no	no	no
ENSG00000137948	4334	10	10	0	0	100	1	BRDT	91949343	92014426	bromodomain testis a...	no	no	no	no
ENSG00000172031	2250	29	29	0	0	100	1	EPHX4	92029985	92063538	epoxide hydrolase 4 ...	no	no	no	no
ENSG00000230667	909	2	2	0	0	100	1	SETSIP	92074533	92075411	SET like protein [So...	no	no	no	no
ENSG00000189195	8342	681	681	0	0	100	1	BTBD8	92080305	92184725	BTB domain containin...	no	no	no	no
ENSG00000203910	1086	3	3	0	0	100	1	C1orf146	92217915	92245813	chromosome 1 open re...	no	no	no	no
ENSG00000174842	2910	1819	1823	4	0	99.7806	1	GLMN	92246402	92298987	glomulin, FKBP assoc...	no	no	no	no
ENSG00000122484	17048	1442	1454	12	0	99.1747	1	RPAP2	92299059	92402056	RNA polymerase II as...	no	no	no	no
ENSG00000162676	5069	6	6	0	0	100	1	GFI1	92473043	92486925	growth factor indepe...	no	no	no	no
ENSG00000067208	8276	1066	1066	0	0	100	1	EVI5	92508696	92792404	ecotropic viral inte...	no	no	no	no
ENSG00000229992	583	6	6	0	0	100	1	HMGB3P9	92647048	92647630	high mobility group ...	no	no	no	no
ENSG00000122406	3687	56259	56293	34	0	99.9396	1	RPL5	92832013	92841924	ribosomal protein L5...	no	no	no	no
ENSG00000154511	3091	495	499	4	0	99.1984	1	DIPK1A	92832737	92961522	divergent protein ki...	no	no	no	no
ENSG00000207523	133	11	11	0	0	100	1	SNORA66	92840719	92840851	small nucleolar RNA,...	no	no	no	no
ENSG00000143033	5907	8130	8246	116	1	98.5933	1	MTF2	93079235	93139079	metal response eleme...	no	no	no	no
ENSG00000117500	9211	2118	2118	0	0	100	1	TMED5	93149742	93180516	transmembrane p24 tr...	no	no	no	no
ENSG00000122483	5633	1593	1593	0	0	100	1	CCDC18	93179919	93278730	coiled-coil domain c...	no	no	no	no
ENSG00000223745	6284	1040	1072	32	2	97.0149	1	CCDC18-AS1	93262186	93346025	CCDC18 antisense RNA...	no	no	no	no
ENSG00000229567	169	9	9	0	0	100	1		93278961	93279129	ribosomal protein L3...	no	no	no	no
ENSG00000117505	10925	4755	4783	28	0	99.4146	1	DR1	93345907	93369493	down-regulator of tr...	no	no	no	no
ENSG00000229635	512	20	20	0	0	100	1		93384487	93384998	pseudogene similar t...	no	no	no	no
ENSG00000137942	5798	13372	13400	28	0	99.791	1	FNBP1L	93448118	93554661	formin binding prote...	no	no	no	no
ENSG00000137936	6919	538	538	0	0	100	1	BCAR3	93561741	93847150	BCAR3 adaptor protei...	no	no	no	no
ENSG00000224093	1954	16	16	0	0	100	1	BCAR3-AS1	93591966	93610605	BCAR3 antisense RNA ...	no	no	no	no
ENSG00000211575	80	7	7	0	0	100	1	MIR760	93846832	93846911	microRNA 760 [Source...	no	no	no	no
ENSG00000260464	1766	10	10	0	0	100	1		93847174	93848939	novel transcript	no	no	no	no
ENSG00000067334	7518	5701	5721	20	0	99.6504	1	DNTTIP2	93866284	93879918	deoxynucleotidyltran...	no	no	no	no
ENSG00000023909	5426	1644	1660	16	0	99.0361	1	GCLM	93885199	93909456	glutamate-cysteine l...	no	no	no	no
ENSG00000234099	1058	6	6	0	0	100	1	MTND4P11	93922574	93923945	MT-ND4 pseudogene 11...	no	no	no	no
ENSG00000198691	8547	16	16	0	0	100	1	ABCA4	93992834	94121148	ATP binding cassette...	no	no	no	no
ENSG00000137962	18370	1196	1208	12	0	99.0066	1	ARHGAP29	94148988	94275068	Rho GTPase activatin...	no	no	no	no
ENSG00000117528	7655	2750	2786	36	1	98.7078	1	ABCD3	94418389	94518666	ATP binding cassette...	no	no	no	no
ENSG00000117525	2886	346	350	4	1	98.8571	1	F3	94529173	94541759	coagulation factor I...	no	no	no	no
ENSG00000224081	10245	225	225	0	0	100	1	SLC44A3-AS1	94613814	94855426	SLC44A3 antisense RN...	no	no	no	no
ENSG00000143036	2869	153	153	0	0	100	1	SLC44A3	94820342	94895246	solute carrier famil...	no	no	no	no
ENSG00000117519	2783	14522	14566	44	0	99.6979	1	CNN3	94896949	94927223	calponin 3 [Source:H...	no	no	no	no
ENSG00000235501	2517	680	694	14	2	97.9827	1	CNN3-DT	94927361	94963616	CNN3 divergent trans...	no	no	no	no
ENSG00000172339	9641	42	42	0	0	100	1	ALG14	94974405	95072951	ALG14 UDP-N-acetylgl...	no	no	no	no
ENSG00000152078	7385	550	550	0	0	100	1	TLCD4	95117355	95197607	TLC domain containin...	no	no	no	no
ENSG00000271092	1961	38	38	0	0	100	1	TLCD4-RWDD3	95117923	95247225	TLCD4-RWDD3 readthro...	no	no	no	no
ENSG00000122481	1927	161	162	1	0	99.3827	1	RWDD3	95234210	95247225	RWD domain containin...	no	no	no	no
ENSG00000228852	1418	42	42	0	0	100	1		95243167	95278940	novel transcript, an...	no	no	no	no
ENSG00000228971	6920	12	12	0	0	100	1	LINC02607	95510059	95782342	long intergenic non-...	no	no	no	no
ENSG00000228502	1389	7	668	661	98	1.0479	1	EEF1A1P11	96446930	96448318	eukaryotic translati...	no	no	no	no
ENSG00000137970	747	153	1017	864	84	15.0442	1	RPL7P9	96678874	96679620	ribosomal protein L7...	no	no	no	no
ENSG00000117569	14681	3563	3567	4	0	99.8879	1	PTBP2	96721665	96823738	polypyrimidine tract...	no	no	no	no
ENSG00000188641	7131	20	20	0	0	100	1	DPYD	97077743	97995000	dihydropyrimidine de...	no	no	no	no
ENSG00000259946	1810	6	6	0	0	100	1		97967005	97968814	novel transcript	no	no	no	no
ENSG00000162627	2067	1305	1317	12	0	99.0888	1	SNX7	98661701	98760500	sorting nexin 7 [Sou...	no	no	no	no
ENSG00000117598	4699	387	391	4	1	98.977	1	PLPPR5	98890245	99227929	phospholipid phospha...	no	no	no	no
ENSG00000117600	5540	430	430	0	0	100	1	PLPPR4	99264292	99309590	phospholipid phospha...	no	no	no	no
ENSG00000156869	8624	353	353	0	0	100	1	FRRS1	99703970	99766635	ferric chelate reduc...	no	no	no	no
ENSG00000162688	8157	2689	2690	1	0	99.9628	1	AGL	99850361	99924023	amylo-alpha-1, 6-glu...	no	no	no	no
ENSG00000117620	18235	1455	1463	8	0	99.4532	1	SLC35A3	99969351	100035634	solute carrier famil...	no	no	no	no
ENSG00000283761	5765	10	10	0	0	100	1		99970011	100083321	novel protein	no	no	no	no
ENSG00000156875	2945	105	105	0	0	100	1	MFSD14A	100038095	100083377	major facilitator su...	no	no	no	no
ENSG00000156876	3972	1355	1357	2	0	99.8526	1	SASS6	100083563	100132955	SAS-6 centriolar ass...	no	no	no	no
ENSG00000122435	4134	847	855	8	0	99.0643	1	TRMT13	100133150	100150496	tRNA methyltransfera...	no	no	no	no
ENSG00000122477	1992	135	135	0	0	100	1	LRRC39	100148448	100178273	leucine rich repeat ...	no	no	no	no
ENSG00000137992	11303	3517	3525	8	0	99.773	1	DBT	100186919	100249834	dihydrolipoamide bra...	no	no	no	no
ENSG00000225169	378	24	24	0	0	100	1	BRI3P1	100213293	100213670	brain protein I3 pse...	no	no	no	no
ENSG00000224616	10034	310	312	2	0	99.359	1	RTCA-AS1	100251528	100266182	RTCA antisense RNA 1...	no	no	no	no
ENSG00000137996	3028	2423	2423	0	0	100	1	RTCA	100266216	100292769	RNA 3'-terminal phos...	no	no	no	no
ENSG00000215871	814	6	6	0	0	100	1		100331804	100332617	novel pseudogene	no	no	no	no
ENSG00000079335	6510	797	811	14	1	98.2737	1	CDC14A	100345001	100520277	cell division cycle ...	no	no	no	no
ENSG00000228086	592	9	9	0	0	100	1		100462399	100485997	novel transcript	no	no	no	no
ENSG00000162694	4015	3521	3549	28	0	99.211	1	EXTL2	100872372	100895179	exostosin like glyco...	no	no	no	no
ENSG00000273204	429	22	22	0	0	100	1		100894928	100895356	novel transcript, an...	no	no	no	no
ENSG00000162695	8600	2128	2132	4	0	99.8124	1	SLC30A7	100896076	100981757	solute carrier famil...	no	no	no	no
ENSG00000230946	979	14	14	0	0	100	1	HNRNPA1P68	100941017	100941995	heterogeneous nuclea...	no	no	no	no
ENSG00000117543	2970	2667	2693	26	0	99.0345	1	DPH5	100989623	101026088	diphthamide biosynth...	no	no	no	no
ENSG00000235795	671	31	31	0	0	100	1		100995473	100996260	novel transcript	no	no	no	no
ENSG00000233184	9868	297	297	0	0	100	1	DPH5-DT	101025844	101090513	DPH5 divergent trans...	no	no	no	no
ENSG00000170989	5223	68	68	0	0	100	1	S1PR1	101236865	101243713	sphingosine-1-phosph...	no	no	no	no
ENSG00000183298	880	19	63	44	69	30.1587	1	RPSAP19	101786340	101787219	ribosomal protein SA...	no	no	no	no
ENSG00000118733	4393	26	26	0	0	100	1	OLFM3	101802560	101996926	olfactomedin 3 [Sour...	no	no	no	no
ENSG00000060718	9091	2790	2798	8	0	99.7141	1	COL11A1	102876467	103108872	collagen type XI alp...	no	no	no	no
ENSG00000222069	318	4	4	0	0	100	1	RN7SKP285	103523562	103523879	RN7SK pseudogene 285...	no	no	no	no
ENSG00000185946	6867	1199	1227	28	2	97.718	1	RNPC3	103525691	103555239	RNA binding region (...	no	no	no	no
ENSG00000240038	7491	119	119	0	0	100	1	AMY2B	103553815	103579534	amylase alpha 2B [So...	no	no	no	no
ENSG00000237897	593	10	10	0	0	100	1		105890693	105891430	matrin 3 (MATR3) pse...	no	no	no	no
ENSG00000198890	4340	1753	1773	20	1	98.872	1	PRMT6	107056674	107067636	protein arginine met...	no	no	no	no
ENSG00000162631	9138	234	234	0	0	100	1	NTNG1	107140007	107484923	netrin G1 [Source:HG...	no	no	no	no
ENSG00000224550	246	1	1	0	0	100	1	NDUFA4P1	107505203	107505448	NDUFA4 pseudogene 1 ...	no	no	no	no
ENSG00000134215	7306	1053	1053	0	0	100	1	VAV3	107571161	107965180	vav guanine nucleoti...	no	no	no	no
ENSG00000085491	6726	3541	3561	20	0	99.4384	1	SLC25A24	108134043	108200849	solute carrier famil...	no	no	no	no
ENSG00000196427	2586	8	8	0	0	100	1	NBPF4	108222464	108244081	NBPF member 4 [Sourc...	no	no	no	no
ENSG00000241361	1882	6	6	0	0	100	1	SLC25A24P1	108273139	108337387	SLC25A24 pseudogene ...	no	no	no	no
ENSG00000162636	9350	2700	2704	4	0	99.8521	1	FAM102B	108560089	108644900	family with sequence...	no	no	no	no
ENSG00000162639	2426	210	210	0	0	100	1	HENMT1	108648290	108661526	HEN methyltransferas...	no	no	no	no
ENSG00000134186	6955	7519	7527	8	0	99.8937	1	PRPF38B	108692310	108702928	pre-mRNA processing ...	no	no	no	no
ENSG00000143107	3090	8	8	0	0	100	1	FNDC7	108712908	108742749	fibronectin type III...	no	no	no	no
ENSG00000232971	386	4	4	0	0	100	1		108734256	108734725	novel transcript, an...	no	no	no	no
ENSG00000116266	5892	2498	2522	24	0	99.0484	1	STXBP3	108746674	108809523	syntaxin binding pro...	no	no	no	no
ENSG00000162641	5039	8	8	0	0	100	1	AKNAD1	108815898	108963484	AKNA domain containi...	no	no	no	no
ENSG00000121957	19578	1314	1576	262	16	83.3756	1	GPSM2	108875350	108934545	G protein signaling ...	no	no	no	no
ENSG00000121940	10933	1444	1444	0	0	100	1	CLCC1	108881885	108963527	chloride channel CLI...	no	no	no	no
ENSG00000085433	4423	470	470	0	0	100	1	WDR47	108970214	109042113	WD repeat domain 47 ...	no	no	no	no
ENSG00000244716	555	70	790	720	91	8.86076	1		108992282	108992836	ribosomal protein L1...	no	no	no	no
ENSG00000197780	1401	1007	1007	0	0	100	1	TAF13	109062496	109076012	TATA-box binding pro...	no	no	no	no
ENSG00000273382	2888	43	43	0	0	100	1	TMEM167B-DT	109087971	109090858	TMEM167B divergent t...	no	no	no	no
ENSG00000215717	3613	1738	1738	0	0	100	1	TMEM167B	109090764	109096934	transmembrane protei...	no	no	no	no
ENSG00000251484	609	4	4	0	0	100	1		109103535	109104766	poly(rC) binding pro...	no	no	no	no
ENSG00000116299	9194	88	88	0	0	100	1	ELAPOR1	109113679	109206781	endosome-lysosome as...	no	no	no	no
ENSG00000031698	3849	7727	7783	56	0	99.2805	1	SARS1	109213918	109238182	seryl-tRNA synthetas...	no	no	no	no
ENSG00000143126	12830	4335	4375	40	0	99.0857	1	CELSR2	109249539	109275751	cadherin EGF LAG sev...	no	no	no	no
ENSG00000134222	2855	3813	3817	4	0	99.8952	1	PSRC1	109279556	109283186	proline and serine r...	no	no	no	no
ENSG00000221986	1759	22	22	0	0	100	1	MYBPHL	109292365	109307011	myosin binding prote...	no	no	no	no
ENSG00000134243	9127	6930	6942	12	0	99.8271	1	SORT1	109309568	109397918	sortilin 1 [Source:H...	no	no	no	no
ENSG00000143106	5734	5331	5339	8	0	99.8502	1	PSMA5	109399042	109426448	proteasome 20S subun...	no	no	no	no
ENSG00000143028	4042	91	91	0	0	100	1	SYPL2	109466546	109482134	synaptophysin like 2...	no	no	no	no
ENSG00000162650	5232	555	559	4	0	99.2844	1	ATXN7L2	109483479	109492804	ataxin 7 like 2 [Sou...	no	no	no	no
ENSG00000174151	5690	357	357	0	0	100	1	CYB561D1	109494052	109502932	cytochrome b561 fami...	no	no	no	no
ENSG00000181754	5141	390	390	0	0	100	1	AMIGO1	109504178	109509738	adhesion molecule wi...	no	no	no	no
ENSG00000156097	5057	22	22	0	0	100	1	GPR61	109539872	109548406	G protein-coupled re...	no	no	no	no
ENSG00000065135	9044	6009	6017	8	0	99.867	1	GNAI3	109548615	109600195	G protein subunit al...	no	no	no	no
ENSG00000134183	1421	23	23	0	0	100	1	GNAT2	109603091	109619929	G protein subunit al...	no	no	no	no
ENSG00000116337	8938	2178	2194	16	0	99.2707	1	AMPD2	109616104	109632051	adenosine monophosph...	no	no	no	no
ENSG00000168765	5727	832	842	10	1	98.8124	1	GSTM4	109656099	109665496	glutathione S-transf...	no	no	no	no
ENSG00000213366	9116	197	303	106	34	65.0165	1	GSTM2	109668022	109709551	glutathione S-transf...	no	no	no	no
ENSG00000134201	6067	278	281	3	1	98.9324	1	GSTM5	109711780	109775428	glutathione S-transf...	no	no	no	no
ENSG00000241720	808	6	6	0	0	100	1		109725820	109775252	novel transcript	no	no	no	no
ENSG00000134202	4750	94	94	0	0	100	1	GSTM3	109733932	109741038	glutathione S-transf...	no	no	no	no
ENSG00000184371	5238	218	218	0	0	100	1	CSF1	109910242	109930992	colony stimulating f...	no	no	no	no
ENSG00000168710	5035	10821	11057	236	2	97.8656	1	AHCYL1	109984765	110023742	adenosylhomocysteina...	no	no	no	no
ENSG00000143093	7344	2871	2883	12	0	99.5838	1	STRIP1	110031577	110074641	striatin interacting...	no	no	no	no
ENSG00000258634	4216	1078	1080	2	0	99.8148	1		110058340	110062555	novel transcript, an...	no	no	no	no
ENSG00000156150	1976	6	6	0	0	100	1	ALX3	110059870	110070672	ALX homeobox 3 [Sour...	no	no	no	no
ENSG00000186150	1505	4	4	0	0	100	1	UBL4B	110112443	110113947	ubiquitin like 4B [S...	no	no	no	no
ENSG00000197106	6636	34	34	0	0	100	1	SLC6A17	110150494	110202202	solute carrier famil...	no	no	no	no
ENSG00000235526	508	5	5	0	0	100	1		110177643	110178719	novel transcript	no	no	no	no
ENSG00000224965	748	1	1	0	0	100	1	KCNC4-DT	110208834	110209987	KCNC4 divergent tran...	no	no	no	no
ENSG00000116396	26071	2202	2230	28	1	98.7444	1	KCNC4	110210314	110283100	potassium voltage-ga...	no	no	no	no
ENSG00000227963	2611	28	28	0	0	100	1	RBM15-AS1	110286375	110339171	RBM15 antisense RNA ...	no	no	no	no
ENSG00000162775	4670	2112	2116	4	0	99.811	1	RBM15	110338506	110346681	RNA binding motif pr...	no	no	no	no
ENSG00000224699	12654	285	285	0	0	100	1	LAMTOR5-AS1	110347116	110443817	LAMTOR5 antisense RN...	no	no	no	no
ENSG00000168679	3164	153	157	4	2	97.4522	1	SLC16A4	110362851	110391082	solute carrier famil...	no	no	no	no
ENSG00000273373	2850	669	673	4	0	99.4056	1	SLC16A4-AS1	110370154	110373003	SLC16A4 antisense RN...	no	no	no	no
ENSG00000134248	2388	1463	1467	4	0	99.7273	1	LAMTOR5	110401249	110407942	late endosomal/lysos...	no	no	no	no
ENSG00000143125	1393	4	4	0	0	100	1	PROK1	110451149	110457358	prokineticin 1 [Sour...	no	no	no	no
ENSG00000235407	2351	6	6	0	0	100	1	CYMP-AS1	110487680	110490258	CYMP antisense RNA 1...	no	no	no	no
ENSG00000177301	18723	28	28	0	0	100	1	KCNA2	110519837	110631474	potassium voltage-ga...	no	no	no	no
ENSG00000259834	3481	68	68	0	0	100	1	AL365361.1	110653560	110657040	lncRNA	no	no	no	no
ENSG00000177272	2476	8	8	0	0	100	1	KCNA3	110653560	110674940	potassium voltage-ga...	no	no	no	no
ENSG00000237415	865	3	5	2	40	60	1	NRBF2P3	110848077	110848941	nuclear receptor bin...	no	no	no	no
ENSG00000143119	2152	34	34	0	0	100	1	CD53	110871188	110899922	CD53 molecule [Sourc...	no	no	no	no
ENSG00000261654	5985	22	22	0	0	100	1		110936369	110942353	novel transcript, se...	no	no	no	no
ENSG00000232811	2359	44	52	8	15	84.6154	1		110943467	110952848	novel transcript	no	no	no	no
ENSG00000121931	3502	1666	1666	0	0	100	1	LRIF1	110947190	110963965	ligand dependent nuc...	no	no	no	no
ENSG00000273010	1348	10	10	0	0	100	1		110963302	110964649	novel transcript, an...	no	no	no	no
ENSG00000156171	3138	1822	1850	28	1	98.4865	1	DRAM2	111117163	111140203	DNA damage regulated...	no	no	no	no
ENSG00000134255	8418	1280	1280	0	0	100	1	CEPT1	111139479	111185104	choline/ethanolamine...	no	no	no	no
ENSG00000162777	6677	180	180	0	0	100	1	DENND2D	111185969	111204535	DENN domain containi...	no	no	no	no
ENSG00000064886	3295	6	6	0	0	100	1	CHI3L2	111200771	111243440	chitinase 3 like 2 [...	no	no	no	no
ENSG00000173947	3949	237	241	4	1	98.3402	1	PIFO	111346600	111353013	primary cilia format...	no	no	no	no
ENSG00000085465	2520	571	573	2	0	99.651	1	OVGP1	111414319	111427735	oviductal glycoprote...	no	no	no	no
ENSG00000260948	2023	297	297	0	0	100	1		111431046	111433068	novel transcript, se...	no	no	no	no
ENSG00000233337	524	82	82	0	0	100	1	UBE2FP3	111437514	111438037	UBE2F pseudogene 3 [...	no	no	no	no
ENSG00000243960	861	49	49	0	0	100	1		111438638	111441364	novel transcript	no	no	no	no
ENSG00000116455	2685	1872	1894	22	1	98.8384	1	WDR77	111439890	111449256	WD repeat domain 77 ...	no	no	no	no
ENSG00000199890	111	11	11	0	0	100	1		111446798	111446908	Y RNA [Source:RFAM;A...	no	no	no	no
ENSG00000116459	3138	7635	7655	20	0	99.7387	1	ATP5PB	111448864	111462773	ATP synthase periphe...	no	no	no	no
ENSG00000143110	2768	68	68	0	0	100	1	C1orf162	111473792	111478512	chromosome 1 open re...	no	no	no	no
ENSG00000116473	5532	2372	2376	4	0	99.8316	1	RAP1A	111542218	111716691	RAP1A, member of RAS...	no	no	no	no
ENSG00000231346	1377	2	2	0	0	100	1	LINC01160	111599655	111608723	long intergenic non-...	no	no	no	no
ENSG00000215867	1254	8	8	0	0	100	1	KRT18P57	111648291	111649544	keratin 18 pseudogen...	no	no	no	no
ENSG00000197852	6393	1580	1584	4	0	99.7475	1	INKA2	111680630	111755824	inka box actin regul...	no	no	no	no
ENSG00000227811	2414	31	31	0	0	100	1	INKA2-AS1	111739579	111747798	INKA2 antisense RNA ...	no	no	no	no
ENSG00000284830	4326	13	13	0	0	100	1		111745299	111755537	novel transcript	no	no	no	no
ENSG00000064703	5585	2188	2188	0	0	100	1	DDX20	111754832	111775602	DEAD-box helicase 20...	no	no	no	no
ENSG00000171385	7863	38	38	0	0	100	1	KCND3	111770662	111989668	potassium voltage-ga...	no	no	no	no
ENSG00000237556	777	16	16	0	0	100	1	KCND3-AS1	111909336	111910931	KCND3 antisense RNA ...	no	no	no	no
ENSG00000231246	6267	4	4	0	0	100	1	LINC02884	112176836	112360625	long intergenic non-...	no	no	no	no
ENSG00000143079	7371	2802	2810	8	0	99.7153	1	CTTNBP2NL	112396214	112463456	CTTNBP2 N-terminal l...	no	no	no	no
ENSG00000134245	12374	83	83	0	0	100	1	WNT2B	112466541	112530165	Wnt family member 2B...	no	no	no	no
ENSG00000007341	8108	592	592	0	0	100	1	ST7L	112523514	112620825	suppression of tumor...	no	no	no	no
ENSG00000116489	3495	6997	7083	86	1	98.7858	1	CAPZA1	112619805	112671616	capping actin protei...	no	no	no	no
ENSG00000155363	6509	4958	5016	58	1	98.8437	1	MOV10	112673141	112700756	Mov10 RISC complex R...	no	no	no	no
ENSG00000225075	449	4	4	0	0	100	1		112693688	112696621	novel transcript	no	no	no	no
ENSG00000155366	4007	1432	1468	36	2	97.5477	1	RHOC	112701127	112707434	ras homolog family m...	no	no	no	no
ENSG00000271810	1078	1	1	0	0	100	1		112702614	112711433	novel protein, PPM1J...	no	no	no	no
ENSG00000155367	2874	1209	1209	0	0	100	1	PPM1J	112709994	112715332	protein phosphatase,...	no	no	no	no
ENSG00000184599	1282	41	41	0	0	100	1	TAFA3	112718905	112727235	TAFA chemokine like ...	no	no	no	no
ENSG00000215866	3183	1172	1172	0	0	100	1	LINC01356	112820170	112850643	long intergenic non-...	no	no	no	no
ENSG00000224167	794	4	4	0	0	100	1	LINC01357	112849821	112877878	long intergenic non-...	no	no	no	no
ENSG00000155380	5155	31511	31579	68	0	99.7847	1	SLC16A1	112911847	112957593	solute carrier famil...	no	no	no	no
ENSG00000229020	915	44	44	0	0	100	1	AKR7A2P1	112923423	112924337	AKR7A2 pseudogene 1 ...	no	no	no	no
ENSG00000226419	12677	799	807	8	0	99.0087	1	SLC16A1-AS1	112956415	113047055	SLC16A1 antisense RN...	no	no	no	no
ENSG00000287807	1389	6	6	0	0	100	1		112978610	112999636	novel transcript	no	no	no	no
ENSG00000238198	2467	49	49	0	0	100	1	LRIG2-DT	113011687	113073113	LRIG2 divergent tran...	no	no	no	no
ENSG00000198799	12467	3403	3463	60	1	98.2674	1	LRIG2	113073198	113132260	leucine rich repeats...	no	no	no	no
ENSG00000236887	434	1	1	0	0	100	1		113198825	113199258	ribosomal protein S1...	no	no	no	no
ENSG00000081026	8414	826	826	0	0	100	1	MAGI3	113390515	113685923	membrane associated ...	no	no	no	no
ENSG00000232499	1029	8	10	2	20	80	1		113449700	113450728	heterogeneous nuclea...	no	no	no	no
ENSG00000116793	7170	1549	1553	4	0	99.7424	1	PHTF1	113696831	113759489	putative homeodomain...	no	no	no	no
ENSG00000232450	748	30	30	0	0	100	1		113698884	113699631	ribosomal protein S2...	no	no	no	no
ENSG00000081019	6819	2065	2077	12	0	99.4222	1	RSBN1	113761832	113812476	round spermatid basi...	no	no	no	no
ENSG00000226167	1734	29	29	0	0	100	1	AP4B1-AS1	113856635	113901237	AP4B1 antisense RNA ...	no	no	no	no
ENSG00000188761	9095	8	8	0	0	100	1	BCL2L15	113876816	113887581	BCL2 like 15 [Source...	no	no	no	no
ENSG00000134262	5847	482	498	16	3	96.7871	1	AP4B1	113894194	113905201	adaptor related prot...	no	no	no	no
ENSG00000118655	3868	602	602	0	0	100	1	DCLRE1B	113904619	113914086	DNA cross-link repai...	no	no	no	no
ENSG00000235527	3090	12	12	0	0	100	1	HIPK1-AS1	113924000	113929495	HIPK1 antisense RNA ...	no	no	no	no
ENSG00000163349	9148	6040	6058	18	0	99.7029	1	HIPK1	113929324	113977869	homeodomain interact...	no	no	no	no
ENSG00000116774	2821	2702	2710	8	0	99.7048	1	OLFML3	113979391	114035572	olfactomedin like 3 ...	no	no	no	no
ENSG00000270780	565	1	1	0	0	100	1		114001433	114002235	ribosomal protein L1...	no	no	no	no
ENSG00000282048	2119	1172	1176	4	0	99.6599	1		114032377	114034511	novel transcript, se...	no	no	no	no
ENSG00000134207	5065	1873	1897	24	1	98.7348	1	SYT6	114089291	114153880	synaptotagmin 6 [Sou...	no	no	no	no
ENSG00000197323	9604	8004	8032	28	0	99.6514	1	TRIM33	114392790	114511203	tripartite motif con...	no	no	no	no
ENSG00000116752	1289	2257	2261	4	0	99.8231	1	BCAS2	114567557	114581629	BCAS2 pre-mRNA proce...	no	no	no	no
ENSG00000175984	7413	422	422	0	0	100	1	DENND2C	114582848	114670422	DENN domain containi...	no	no	no	no
ENSG00000213281	4326	7791	7799	8	0	99.8974	1	NRAS	114704469	114716771	NRAS proto-oncogene,...	no	no	no	no
ENSG00000009307	5778	57186	57326	140	0	99.7558	1	CSDE1	114716913	114758676	cold shock domain co...	no	no	no	no
ENSG00000201900	105	7	7	0	0	100	1	RNY1P13	114727720	114727824	RNY1 pseudogene 13 [...	no	no	no	no
ENSG00000052723	5894	4287	4331	44	1	98.9841	1	SIKE1	114769479	114780685	suppressor of IKBKE ...	no	no	no	no
ENSG00000198765	4278	28	28	0	0	100	1	SYCP1	114854863	114995370	synaptonemal complex...	no	no	no	no
ENSG00000134198	3413	1484	1488	4	0	99.7312	1	TSPAN2	115048011	115089503	tetraspanin 2 [Sourc...	no	no	no	no
ENSG00000285698	1354	14	14	0	0	100	1		115270767	115283763	Novel transcript	no	no	no	no
ENSG00000134259	1155	16	16	0	0	100	1	NGF	115285904	115338770	nerve growth factor ...	no	no	no	no
ENSG00000173218	9045	1905	1909	4	0	99.7905	1	VANGL1	115641970	115698224	VANGL planar cell po...	no	no	no	no
ENSG00000177551	7541	305	305	0	0	100	1	NHLH2	115836377	115843917	nescient helix-loop-...	no	no	no	no
ENSG00000163393	5277	304	304	0	0	100	1	SLC22A15	115976513	116070054	solute carrier famil...	no	no	no	no
ENSG00000163399	7277	11901	11909	8	0	99.9328	1	ATP1A1	116372668	116410261	ATPase Na+/K+ transp...	no	no	no	no
ENSG00000203865	13004	189	189	0	0	100	1	ATP1A1-AS1	116378437	116421301	ATP1A1 antisense RNA...	no	no	no	no
ENSG00000116815	1784	240	240	0	0	100	1	CD58	116514534	116571039	CD58 molecule [Sourc...	no	no	no	no
ENSG00000177173	1157	25	25	0	0	100	1	NAP1L4P1	116532936	116534092	nucleosome assembly ...	no	no	no	no
ENSG00000143061	7400	6062	6094	32	0	99.4749	1	IGSF3	116574399	116667755	immunoglobulin super...	no	no	no	no
ENSG00000272715	383	15	15	0	0	100	1		116909149	116909531	novel transcript	no	no	no	no
ENSG00000134247	6488	3643	3663	20	0	99.454	1	PTGFRN	116909916	116990353	prostaglandin F2 rec...	no	no	no	no
ENSG00000134256	3828	102	102	0	0	100	1	CD101	117001750	117036552	CD101 molecule [Sour...	no	no	no	no
ENSG00000236137	1946	12	12	0	0	100	1	CD101-AS1	117025482	117059490	CD101 antisense RNA ...	no	no	no	no
ENSG00000116830	10158	8246	8274	28	0	99.6616	1	TTF2	117060326	117107453	transcription termin...	no	no	no	no
ENSG00000134253	4368	832	836	4	0	99.5215	1	TRIM45	117111060	117122587	tripartite motif con...	no	no	no	no
ENSG00000134258	3027	14	14	0	0	100	1	VTCN1	117143587	117210960	V-set domain contain...	no	no	no	no
ENSG00000271427	575	14	14	0	0	100	1		117364899	117365473	novel transcript	no	no	no	no
ENSG00000198162	9667	2858	2882	24	0	99.1672	1	MAN1A2	117367449	117528872	mannosidase alpha cl...	no	no	no	no
ENSG00000183508	5654	148	148	0	0	100	1	TENT5C	117606048	117628389	terminal nucleotidyl...	no	no	no	no
ENSG00000228217	420	1	1	0	0	100	1	PNRC2P1	117778087	117778506	proline rich nuclear...	no	no	no	no
ENSG00000196505	10487	1025	1089	64	5	94.123	1	GDAP2	117863485	117929621	ganglioside induced ...	no	no	no	no
ENSG00000065183	10276	4965	4973	8	0	99.8391	1	WDR3	117929720	117966543	WD repeat domain 3 [...	no	no	no	no
ENSG00000155761	9828	105	105	0	0	100	1	SPAG17	117953590	118185228	sperm associated ant...	no	no	no	no
ENSG00000092607	4344	24	24	0	0	100	1	TBX15	118883046	118989556	T-box transcription ...	no	no	no	no
ENSG00000116874	3830	706	709	3	0	99.5769	1	WARS2	119031216	119140654	tryptophanyl tRNA sy...	no	no	no	no
ENSG00000231365	11469	757	757	0	0	100	1	WARS2-AS1	119140391	119275973	WARS2 antisense RNA ...	no	no	no	no
ENSG00000227712	2921	17	17	0	0	100	1		119230313	119327915	novel transcript	no	no	no	no
ENSG00000232650	1528	31	31	0	0	100	1	LINC01780	119327399	119356182	long intergenic non-...	no	no	no	no
ENSG00000194297	129	6	6	0	0	100	1	RNU1-75P	119331397	119331525	RNA, U1 small nuclea...	no	no	no	no
ENSG00000116882	1877	22	22	0	0	100	1	HAO2	119368779	119394130	hydroxyacid oxidase ...	no	no	no	no
ENSG00000229570	1006	2	2	0	0	100	1	GAPDHP58	119495836	119496841	glyceraldehyde 3 pho...	no	no	no	no
ENSG00000226443	998	4	4	0	0	100	1	GAPDHP32	119533749	119534746	glyceraldehyde 3 pho...	no	no	no	no
ENSG00000249798	994	12	12	0	0	100	1	HSD3BP3	119538509	119545913	hydroxy-delta-5-ster...	no	no	no	no
ENSG00000203855	1120	5	5	0	0	100	1	HSD3BP4	119564066	119572067	hydroxy-delta-5-ster...	no	no	no	no
ENSG00000240244	1013	2	2	0	0	100	1	GAPDHP33	119596167	119597179	glyceraldehyde 3 pho...	no	no	no	no
ENSG00000260941	1570	88	106	18	16	83.0189	1	LINC00622	119597702	119599271	long intergenic non-...	no	no	no	no
ENSG00000198857	1132	84	84	0	0	100	1	HSD3BP5	119601340	119609250	hydroxy-delta-5-ster...	no	no	no	no
ENSG00000143067	5579	2081	2114	33	1	98.439	1	ZNF697	119619377	119648266	zinc finger protein ...	no	no	no	no
ENSG00000092621	9187	35792	35832	40	0	99.8884	1	PHGDH	119648411	119744218	phosphoglycerate deh...	no	no	no	no
ENSG00000134250	19930	9628	9766	138	1	98.5869	1	NOTCH2	119911553	120100779	notch receptor 2 [So...	no	no	no	no
ENSG00000265808	9039	2309	2567	258	10	89.9494	1	SEC22B	120150898	120176520	SEC22 homolog B, ves...	no	no	no	no
ENSG00000223804	1107	30	240	210	87	12.5	1		120340756	120341839	Poly [ADP-ribose] po...	no	no	no	no
ENSG00000270231	5961	439	1050	611	58	41.8095	1	NBPF8	120415035	120469676	NBPF member 8 [Sourc...	no	no	no	no
ENSG00000270392	1849	20	42	22	52	47.619	1	PFN1P2	120432204	120434052	profilin 1 pseudogen...	no	no	no	no
ENSG00000275131	9444	466	721	255	35	64.6325	1	PDE4DIPP2	120489860	120701289	PDE4DIP pseudogene 2...	no	no	no	no
ENSG00000273136	6782	117	1598	1481	92	7.32165	1	NBPF26	120723949	120842110	NBPF member 26 [Sour...	no	no	no	no
ENSG00000226067	2600	92	143	51	35	64.3357	1	LINC00623	120913184	121009291	long intergenic non-...	no	no	no	no
ENSG00000277610	164	4	4	0	0	100	1	RNVU1-4	120942600	120942763	RNA, variant U1 smal...	no	no	no	no
ENSG00000275585	1314	7	28	21	75	25	1	PDE4DIPP4	121029592	121042572	PDE4DIP pseudogene 4...	no	no	no	no
ENSG00000234998	459	6	6	0	0	100	1		121087528	121116676	novel transcript, an...	no	no	no	no
ENSG00000233029	3543	8	8	0	0	100	1		121090289	121097655	novel transcript	no	no	no	no
ENSG00000223345	756	30	45	15	33	66.6667	1	H2BP1	121116862	121117242	H2B histone pseudoge...	no	no	no	no
ENSG00000227193	494	2	8	6	75	25	1		121118126	121146826	novel transcript	no	no	no	no
ENSG00000213244	416	11	15	4	26	73.3333	1	H3P4	121118195	121118610	H3 histone pseudogen...	no	no	no	no
ENSG00000188610	3033	2216	3857	1641	42	57.454	1	FAM72B	121167646	121185539	family with sequence...	no	no	no	no
ENSG00000171943	7335	1744	4731	2987	63	36.8632	1	SRGAP2C	121184811	121392874	SLIT-ROBO Rho GTPase...	no	no	no	no
ENSG00000272583	464	20	20	0	0	100	1		121518365	121519601	novel transcript	no	no	no	no
ENSG00000231752	5745	383	393	10	2	97.4555	1	EMBP1	121519345	121568791	embigin pseudogene 1...	no	no	no	no
ENSG00000224857	426	3	3	0	0	100	1	LINC01691	121573946	121580524	long intergenic non-...	no	no	no	no
ENSG00000277702	213	8	9	1	11	88.8889	1		143419625	143420207	lymphocyte-specific ...	no	no	no	no
ENSG00000252826	135	1	1	0	0	100	1	RNVU1-23	143720510	143720644	RNA, variant U1 smal...	no	no	no	no
ENSG00000232721	2675	10	10	0	0	100	1		143735983	143739506	novel transcript	no	no	no	no
ENSG00000233430	1176	6	24	18	75	25	1	PDE4DIPP3	143811359	143825837	PDE4DIP pseudogene 3...	no	no	no	no
ENSG00000234571	4107	2	2	0	0	100	1	H2BP2	143904223	143904603	H2B histone pseudoge...	no	no	no	no
ENSG00000273213	3959	46	128	82	64	35.9375	1	H3-7	143894544	143905977	H3.7 histone (putati...	no	no	no	no
ENSG00000263513	2297	546	4056	3510	86	13.4615	1	FAM72C	143955287	143971986	family with sequence...	no	no	no	no
ENSG00000270872	1021	191	791	600	75	24.1466	1	SRGAP2D	143975087	144068350	SLIT-ROBO Rho GTPase...	no	no	no	no
ENSG00000232527	878	4	26	22	84	15.3846	1	LINC02802	144227029	144250326	long intergenic non-...	no	no	no	no
ENSG00000266338	5306	1200	1835	635	34	65.3951	1	NBPF15	144421390	144461676	NBPF member 15 [Sour...	no	no	no	no
ENSG00000227212	399	26	26	0	0	100	1	PFN1P6	144442606	144443004	profilin 1 pseudogen...	no	no	no	no
ENSG00000275291	162	16	16	0	0	100	1	RNVU1-26	144523860	144524021	RNA, variant U1 smal...	no	no	no	no
ENSG00000196369	7230	654	4450	3796	85	14.6966	1	SRGAP2B	144887265	145095528	SLIT-ROBO Rho GTPase...	no	no	no	no
ENSG00000215784	2423	1013	3941	2928	74	25.7041	1	FAM72D	145095974	145112696	family with sequence...	no	no	no	no
ENSG00000272419	6056	92	267	175	65	34.4569	1	LINC01145	145214677	145215726	long intergenic non-...	no	no	no	no
ENSG00000281571	1088	26	35	9	25	74.2857	1		145214851	145215938	TEC	no	no	no	no
ENSG00000223612	519	30	333	303	90	9.00901	1		145233001	145233519	EGFR-coamplified and...	no	no	no	no
ENSG00000162825	18995	56	440	384	87	12.7273	1	NBPF20	145289900	145425603	NBPF member 20 [Sour...	no	no	no	no
ENSG00000234367	402	6	20	14	70	30	1	PFN1P3	145407772	145408173	profilin 1 pseudogen...	no	no	no	no
ENSG00000272150	3827	4	478	474	99	0.83682	1	NBPF25P	145573965	145591060	NBPF member 25, pseu...	no	no	no	no
ENSG00000117262	5561	349	1834	1485	80	19.0294	1	GPR89A	145607988	145670650	G protein-coupled re...	no	no	no	no
ENSG00000174827	2480	30	111	81	72	27.027	1	PDZK1	145670852	145708148	PDZ domain containin...	no	no	no	no
ENSG00000117281	3971	18	18	0	0	100	1	CD160	145719471	145739288	CD160 molecule [Sour...	no	no	no	no
ENSG00000265491	11059	1941	1990	49	2	97.5377	1	RNF115	145738868	145824095	ring finger protein ...	no	no	no	no
ENSG00000186141	4690	1186	1186	0	0	100	1	POLR3C	145824053	145844402	RNA polymerase III s...	no	no	no	no
ENSG00000186364	1657	166	166	0	0	100	1	NUDT17	145845630	145848954	nudix hydrolase 17 [...	no	no	no	no
ENSG00000131788	4806	2992	2992	0	0	100	1	PIAS3	145848522	145859836	protein inhibitor of...	no	no	no	no
ENSG00000198483	3363	209	209	0	0	100	1	ANKRD35	145866560	145885866	ankyrin repeat domai...	no	no	no	no
ENSG00000143127	6242	43	43	0	0	100	1	ITGA10	145891208	145910111	integrin subunit alp...	no	no	no	no
ENSG00000131779	1718	515	515	0	0	100	1	PEX11B	145911350	145918717	peroxisomal biogenes...	no	no	no	no
ENSG00000265241	5544	3667	3778	111	2	97.0619	1	RBM8A	145921556	145927678	RNA binding motif pr...	no	no	no	no
ENSG00000211451	2511	109	109	0	0	100	1	GNRHR2	145919013	145925341	gonadotropin releasi...	no	no	no	no
ENSG00000271601	3991	194	194	0	0	100	1	LIX1L	145933423	145958017	limb and CNS express...	no	no	no	no
ENSG00000272031	3671	14	14	0	0	100	1	ANKRD34A	145959441	145964575	ankyrin repeat domai...	no	no	no	no
ENSG00000121851	1811	144	144	0	0	100	1	POLR3GL	145964690	145978848	RNA polymerase III s...	no	no	no	no
ENSG00000265972	3604	1549	1549	0	0	100	1	TXNIP	145992435	145996579	thioredoxin interact...	no	no	no	no
ENSG00000168509	2418	30	30	0	0	100	1	HJV	146017468	146036746	hemojuvelin BMP co-r...	no	no	no	no
ENSG00000233396	4614	396	472	76	16	83.8983	1	LINC01719	146052566	146061952	long intergenic non-...	no	no	no	no
ENSG00000271425	14362	234	1453	1219	83	16.1046	1	NBPF10	146064711	146229000	NBPF member 10 [Sour...	no	no	no	no
ENSG00000264343	2957	6	136	130	95	4.41176	1	NOTCH2NLA	146146203	146229041	notch 2 N-terminal l...	no	no	no	no
ENSG00000277406	1466	46	142	96	67	32.3944	1	SEC22B4P	146321842	146328211	SEC22 homolog B4, ps...	no	no	no	no
ENSG00000287978	668	6	6	0	0	100	1		146387202	146388092	novel transcript	no	no	no	no
ENSG00000276975	17641	120	333	213	63	36.036	1	HYDIN2	146547367	146898974	HYDIN axonemal centr...	no	no	no	no
ENSG00000268043	7272	891	2960	2069	69	30.1014	1	NBPF12	146938324	146996202	NBPF member 12 [Sour...	no	no	no	no
ENSG00000244371	543	19	33	14	42	57.5758	1	PFN1P8	146957117	146957659	profilin 1 pseudogen...	no	no	no	no
ENSG00000225603	1665	24	24	0	0	100	1		147050817	147052481	insulin-like growth ...	no	no	no	no
ENSG00000230832	1241	6	6	0	0	100	1	SSBL4P	147082338	147083578	small RNA binding ex...	no	no	no	no
ENSG00000131791	5460	5517	5529	12	0	99.783	1	PRKAB2	147155106	147172550	protein kinase AMP-a...	no	no	no	no
ENSG00000180867	3328	156	372	216	58	41.9355	1	PDIA3P1	147172744	147179622	protein disulfide is...	no	no	no	no
ENSG00000237188	4139	14	14	0	0	100	1		147172755	147295734	novel transcript, an...	no	no	no	no
ENSG00000131781	5984	52	52	0	0	100	1	FMO5	147175351	147243050	flavin containing di...	no	no	no	no
ENSG00000226015	1657	7	7	0	0	100	1	CCT8P1	147203276	147204932	chaperonin containin...	no	no	no	no
ENSG00000131778	4301	84	84	0	0	100	1	CHD1L	147242654	147295765	chromodomain helicas...	no	no	no	no
ENSG00000278811	5564	178	178	0	0	100	1	LINC00624	147258885	147517875	long intergenic non-...	no	no	no	no
ENSG00000116128	6331	6916	6924	8	0	99.8845	1	BCL9	147541501	147626216	BCL9 transcription c...	no	no	no	no
ENSG00000162836	11993	1844	1844	0	0	100	1	ACP6	147629652	147670524	acid phosphatase 6, ...	no	no	no	no
ENSG00000265107	3288	137	137	0	0	100	1	GJA5	147756199	147773362	gap junction protein...	no	no	no	no
ENSG00000188092	5214	342	1825	1483	81	18.7397	1	GPR89B	147928393	147993592	G protein-coupled re...	no	no	no	no
ENSG00000215859	3674	98	179	81	45	54.7486	1	PDZK1P1	147994301	148009592	PDZ domain containin...	no	no	no	no
ENSG00000273059	430	1	1	0	0	100	1		148011799	148012228	novel transcript	no	no	no	no
ENSG00000274372	2603	108	115	7	6	93.913	1	LINC02804	148013203	148025934	long intergenic non-...	no	no	no	no
ENSG00000206791	167	20	20	0	0	100	1	RNU1-129P	148014417	148014583	RNA, U1 small nuclea...	no	no	no	no
ENSG00000263956	5947	2134	3341	1207	36	63.8731	1	NBPF11	148102047	148152322	NBPF member 11 [Sour...	no	no	no	no
ENSG00000225080	402	83	92	9	9	90.2174	1	PFN1P4	148129497	148129898	profilin 1 pseudogen...	no	no	no	no
ENSG00000198658	933	8	16	8	50	50	1	ABHD17AP1	148146395	148149566	ABHD17A pseudogene 1...	no	no	no	no
ENSG00000232265	6391	59	65	6	9	90.7692	1	LINC02805	148156139	148186980	long intergenic non-...	no	no	no	no
ENSG00000227733	16052	297	542	245	45	54.797	1		148159213	148255012	novel transcript	no	no	no	no
ENSG00000224335	217	2	2	0	0	100	1		148234273	148234489	neuroblastoma breakp...	no	no	no	no
ENSG00000227700	517	8	8	0	0	100	1		148246169	148246685	novel pseudogene	no	no	no	no
ENSG00000228626	285	16	16	0	0	100	1		148288001	148288951	novel pseudogene	no	no	no	no
ENSG00000274020	7757	188	213	25	11	88.2629	1	LINC01138	148290889	148519604	long intergenic non-...	no	no	no	no
ENSG00000224481	3386	7	7	0	0	100	1		148295895	148344638	novel transcript	no	no	no	no
ENSG00000207340	164	4	4	0	0	100	1	RNVU1-1	148362370	148362533	RNA, variant U1 smal...	no	no	no	no
ENSG00000278596	82	3	3	0	0	100	1	MIR6077	148388282	148388363	microRNA 6077 [Sourc...	no	no	no	no
ENSG00000231551	3330	69	69	0	0	100	1	PDE4DIPP6	148415258	148428847	PDE4DIP pseudogene 6...	no	no	no	no
ENSG00000201183	161	1	1	0	0	100	1	RNVU1-3	148402715	148402875	RNA, variant U1 smal...	no	no	no	no
ENSG00000225871	1679	11	11	0	0	100	1		148435105	148436926	family with sequence...	no	no	no	no
ENSG00000280649	1058	110	118	8	6	93.2203	1		148458814	148459871	TEC	no	no	no	no
ENSG00000274210	165	1	1	0	0	100	1	RNVU1-27	148522601	148522765	RNA, variant U1 smal...	no	no	no	no
ENSG00000270629	11985	285	2252	1967	87	12.6554	1	NBPF14	148531385	148679742	NBPF member 14 [Sour...	no	no	no	no
ENSG00000178104	27623	2913	3342	429	12	87.1634	1	PDE4DIP	148808140	149048286	phosphodiesterase 4D...	no	no	no	no
ENSG00000269713	9046	803	1436	633	44	55.9192	1	NBPF9	149052186	149103561	NBPF member 9 [Sourc...	no	no	no	no
ENSG00000274265	4291	210	456	246	53	46.0526	1		149175748	149259987	novel transcript	no	no	no	no
ENSG00000215861	1033	14	38	24	63	36.8421	1		149197992	149321732	phosphodiesterase 4D...	no	no	no	no
ENSG00000274423	573	2	6	4	66	33.3333	1	SEC22B2P	149345661	149357612	SEC22 homolog B2, ps...	no	no	no	no
ENSG00000286219	5343	106	246	140	56	43.0894	1	NOTCH2NLC	149390621	149471833	notch 2 N-terminal l...	no	no	no	no
ENSG00000271383	13754	26	30	4	13	86.6667	1	NBPF19	149475045	149556361	NBPF member 19 [Sour...	no	no	no	no
ENSG00000277147	10917	146	301	155	51	48.505	1	LINC00869	149655731	149669321	long intergenic non-...	no	no	no	no
ENSG00000275557	447	71	105	34	32	67.619	1		149607765	149612402	novel transcript	no	no	no	no
ENSG00000206828	164	9	9	0	0	100	1	RNVU1-30	149636766	149636929	RNA, variant U1 smal...	no	no	no	no
ENSG00000234232	3340	87	143	56	39	60.8392	1	PDE4DIPP7	149720531	149734391	PDE4DIP pseudogene 7...	no	no	no	no
ENSG00000203814	3196	50	57	7	12	87.7193	1	H2BC18	149782689	149812373	H2B clustered histon...	no	no	no	no
ENSG00000233030	3543	8	8	0	0	100	1		149785659	149793020	novel transcript, an...	no	no	no	no
ENSG00000270882	1876	6	177	171	96	3.38983	1	H4C14	149832657	149839767	H4 clustered histone...	no	no	no	no
ENSG00000203812	549	2	137	135	98	1.45985	1	H2AC18	149842188	149842736	protein_coding	no	no	no	no
ENSG00000220323	3612	198	415	217	52	47.7108	1	H2BC19P	149843041	149843533	H2B clustered histon...	no	no	no	no
ENSG00000261716	6440	330	547	217	39	60.3291	1	H2BC20P	149850193	149850772	H2B clustered histon...	no	no	no	no
ENSG00000270276	1929	2	173	171	98	1.15607	1	H4C15	149854045	149861159	H4 clustered histone...	no	no	no	no
ENSG00000184678	2194	156	159	3	1	98.1132	1	H2BC21	149884459	149886682	H2B clustered histon...	no	no	no	no
ENSG00000184260	494	62	62	0	0	100	1	H2AC20	149886918	149887411	H2A clustered histon...	no	no	no	no
ENSG00000184270	497	8	8	0	0	100	1	H2AC21	149887469	149887965	H2A clustered histon...	no	no	no	no
ENSG00000178096	1461	382	382	0	0	100	1	BOLA1	149887890	149900798	bolA family member 1...	no	no	no	no
ENSG00000159164	4786	3781	3789	8	0	99.7889	1	SV2A	149903318	149917844	synaptic vesicle gly...	no	no	no	no
ENSG00000143368	1704	5345	5357	12	0	99.776	1	SF3B4	149923317	149927803	splicing factor 3b s...	no	no	no	no
ENSG00000014914	4572	368	372	4	1	98.9247	1	MTMR11	149928651	149936879	myotubularin related...	no	no	no	no
ENSG00000264522	12227	1899	1899	0	0	100	1	OTUD7B	149937812	150010726	OTU deubiquitinase 7...	no	no	no	no
ENSG00000285184	3586	41	41	0	0	100	1		150045660	150067722	novel transcript	no	no	no	no
ENSG00000136631	6637	1685	1693	8	0	99.5275	1	VPS45	150067279	150145329	vacuolar protein sor...	no	no	no	no
ENSG00000023902	6629	1651	1651	0	0	100	1	PLEKHO1	150149183	150164720	pleckstrin homology ...	no	no	no	no
ENSG00000285554	1155	18	18	0	0	100	1	LINC02988	150173049	150181429	long intergenic non-...	no	no	no	no
ENSG00000143401	3605	12729	12765	36	0	99.718	1	ANP32E	150218417	150236156	acidic nuclear phosp...	no	no	no	no
ENSG00000222222	190	1	1	0	0	100	1	RNU2-17P	150236967	150237156	RNA, U2 small nuclea...	no	no	no	no
ENSG00000276110	714	25	25	0	0	100	1		150255095	150257286	novel transcript, an...	no	no	no	no
ENSG00000118298	3296	2151	2166	15	0	99.3075	1	CA14	150257251	150265078	carbonic anhydrase 1...	no	no	no	no
ENSG00000117362	3473	4417	4417	0	0	100	1	APH1A	150265399	150269580	aph-1 homolog A, gam...	no	no	no	no
ENSG00000118292	1270	141	141	0	0	100	1	C1orf54	150268200	150280916	chromosome 1 open re...	no	no	no	no
ENSG00000159208	2849	268	268	0	0	100	1	CIART	150282543	150287093	circadian associated...	no	no	no	no
ENSG00000266472	1500	4291	4498	207	4	95.398	1	MRPS21	150293861	150308979	mitochondrial riboso...	no	no	no	no
ENSG00000117360	5408	3808	3815	7	0	99.8165	1	PRPF3	150321479	150353233	pre-mRNA processing ...	no	no	no	no
ENSG00000163125	8738	3339	3343	4	0	99.8803	1	RPRD2	150363091	150476566	regulation of nuclea...	no	no	no	no
ENSG00000143374	4077	2883	2887	4	0	99.8614	1	TARS2	150487414	150507602	threonyl-tRNA synthe...	no	no	no	no
ENSG00000143369	3360	100	100	0	0	100	1	ECM1	150508062	150513789	extracellular matrix...	no	no	no	no
ENSG00000228126	566	70	70	0	0	100	1	FALEC	150515757	150518032	focally amplified lo...	no	no	no	no
ENSG00000237781	665	11	11	0	0	100	1	ADAMTSL4-AS2	150548562	150557724	ADAMTSL4 antisense R...	no	no	no	no
ENSG00000143382	6432	748	752	4	0	99.4681	1	ADAMTSL4	150549369	150560937	ADAMTS like 4 [Sourc...	no	no	no	no
ENSG00000264553	86	8	8	0	0	100	1	MIR4257	150551929	150552014	microRNA 4257 [Sourc...	no	no	no	no
ENSG00000203804	2622	19	19	0	0	100	1	ADAMTSL4-AS1	150560202	150562115	ADAMTSL4 antisense R...	no	no	no	no
ENSG00000277452	299	10	10	0	0	100	1	RN7SL473P	150566562	150566860	RNA, 7SL, cytoplasmi...	no	no	no	no
ENSG00000143384	4371	22715	22770	55	0	99.7585	1	MCL1	150560895	150579738	MCL1 apoptosis regul...	no	no	no	no
ENSG00000253047	121	31	31	0	0	100	1		150600539	150600659		no	no	no	no
ENSG00000143420	4619	11208	11234	26	0	99.7686	1	ENSA	150600851	150629612	endosulfine alpha [S...	no	no	no	no
ENSG00000276103	117	5	5	0	0	100	1		150608507	150608623	U4 spliceosomal RNA ...	no	no	no	no
ENSG00000143457	3334	2918	2938	20	0	99.3193	1	GOLPH3L	150646230	150697154	golgi phosphoprotein...	no	no	no	no
ENSG00000163131	4071	6	6	0	0	100	1	CTSS	150730079	150765957	cathepsin S [Source:...	no	no	no	no
ENSG00000143387	1824	399	399	0	0	100	1	CTSK	150794880	150809577	cathepsin K [Source:...	no	no	no	no
ENSG00000143437	6448	2819	2875	56	1	98.0522	1	ARNT	150809713	150876708	aryl hydrocarbon rec...	no	no	no	no
ENSG00000143379	7093	2719	2735	16	0	99.415	1	SETDB1	150926263	150964744	SET domain bifurcate...	no	no	no	no
ENSG00000143418	4643	5043	5063	20	0	99.605	1	CERS2	150960583	150975003	ceramide synthase 2 ...	no	no	no	no
ENSG00000231073	368	16	16	0	0	100	1		150973123	150975534	novel transcript, an...	no	no	no	no
ENSG00000143412	1594	281	281	0	0	100	1	ANXA9	150982249	150995634	annexin A9 [Source:H...	no	no	no	no
ENSG00000143409	3792	767	767	0	0	100	1	MINDY1	150996549	151008376	MINDY lysine 48 deub...	no	no	no	no
ENSG00000143363	3156	2425	2429	4	0	99.8353	1	PRUNE1	151008420	151035713	prune exopolyphospha...	no	no	no	no
ENSG00000200759	107	2	2	0	0	100	1	RNU6-884P	151022746	151022852	RNA, U6 small nuclea...	no	no	no	no
ENSG00000163141	3809	260	260	0	0	100	1	BNIPL	151036321	151047720	BCL2 interacting pro...	no	no	no	no
ENSG00000143443	2320	212	212	0	0	100	1	C1orf56	151047751	151051986	chromosome 1 open re...	no	no	no	no
ENSG00000197622	4184	4604	4608	4	0	99.9132	1	CDC42SE1	151050971	151070325	CDC42 small effector...	no	no	no	no
ENSG00000213190	2483	1285	1289	4	0	99.6897	1	MLLT11	151060397	151069544	MLLT11 transcription...	no	no	no	no
ENSG00000143458	9189	356	356	0	0	100	1	GABPB2	151070578	151125542	GA binding protein t...	no	no	no	no
ENSG00000143434	5809	1950	1958	8	0	99.5914	1	SEMA6C	151131685	151146631	semaphorin 6C [Sourc...	no	no	no	no
ENSG00000163156	3264	1156	1156	0	0	100	1	SCNM1	151156664	151170296	sodium channel modif...	no	no	no	no
ENSG00000163155	2508	366	366	0	0	100	1	LYSMD1	151159748	151165948	LysM domain containi...	no	no	no	no
ENSG00000163157	1843	39	39	0	0	100	1	TMOD4	151169986	151176284	tropomodulin 4 [Sour...	no	no	no	no
ENSG00000163159	1780	3566	3578	12	0	99.6646	1	VPS72	151176304	151195321	vacuolar protein sor...	no	no	no	no
ENSG00000143398	5405	6448	6476	28	0	99.5676	1	PIP5K1A	151197949	151249536	phosphatidylinositol...	no	no	no	no
ENSG00000159352	3021	7521	7551	30	0	99.6027	1	PSMD4	151254709	151267479	proteasome 26S subun...	no	no	no	no
ENSG00000232671	989	17	17	0	0	100	1	ZNF687-AS1	151279678	151282000	ZNF687 antisense RNA...	no	no	no	no
ENSG00000143373	6324	3536	3568	32	0	99.1031	1	ZNF687	151281618	151292176	zinc finger protein ...	no	no	no	no
ENSG00000143393	5456	1996	2004	8	0	99.6008	1	PI4KB	151291797	151327715	phosphatidylinositol...	no	no	no	no
ENSG00000265753	300	1	1	0	0	100	1	RN7SL444P	151300665	151300964	RNA, 7SL, cytoplasmi...	no	no	no	no
ENSG00000273481	481	1	1	0	0	100	1		151327949	151328429	novel transcript	no	no	no	no
ENSG00000143390	4586	3417	3447	30	0	99.1297	1	RFX5	151340640	151347326	regulatory factor X5...	no	no	no	no
ENSG00000237976	618	5	5	0	0	100	1	RFX5-AS1	151346938	151348027	RFX5 antisense RNA 1...	no	no	no	no
ENSG00000143416	3476	852	852	0	0	100	1	SELENBP1	151364304	151372707	selenium binding pro...	no	no	no	no
ENSG00000159377	2125	10800	10808	8	0	99.926	1	PSMB4	151399560	151401937	proteasome 20S subun...	no	no	no	no
ENSG00000143442	10301	9615	9728	113	1	98.8384	1	POGZ	151402724	151459494	pogo transposable el...	no	no	no	no
ENSG00000238711	96	4	4	0	0	100	1	RNY4P25	151439000	151439095	RNY4 pseudogene 25 [...	no	no	no	no
ENSG00000143375	6616	8273	8345	72	0	99.1372	1	CGN	151510510	151538692	cingulin [Source:HGN...	no	no	no	no
ENSG00000252840	108	9	9	0	0	100	1		151527831	151527938		no	no	no	no
ENSG00000143367	3878	1515	1523	8	0	99.4747	1	TUFT1	151540305	151583583	tuftelin 1 [Source:H...	no	no	no	no
ENSG00000232536	526	7	7	0	0	100	1		151540516	151561855	novel transcript	no	no	no	no
ENSG00000143376	16711	3876	3880	4	0	99.8969	1	SNX27	151612006	151699091	sorting nexin 27 [So...	no	no	no	no
ENSG00000250734	535	4	4	0	0	100	1		151612038	151613363	novel transcript, an...	no	no	no	no
ENSG00000206635	107	4	4	0	0	100	1	RNU6-1062P	151629324	151629430	RNA, U6 small nuclea...	no	no	no	no
ENSG00000159409	6774	73	73	0	0	100	1	CELF3	151700058	151716803	CUGBP Elav-like fami...	no	no	no	no
ENSG00000143436	1740	1801	1805	4	0	99.7784	1	MRPL9	151759647	151763496	mitochondrial riboso...	no	no	no	no
ENSG00000143450	4633	35	35	0	0	100	1	OAZ3	151762899	151771334	ornithine decarboxyl...	no	no	no	no
ENSG00000249602	382	27	35	8	22	77.1429	1		151763384	151769501	novel transcript	no	no	no	no
ENSG00000182134	5092	2085	2125	40	1	98.1176	1	TDRKH	151770107	151791416	tudor and KH domain ...	no	no	no	no
ENSG00000203288	1141	57	57	0	0	100	1	TDRKH-AS1	151790804	151794403	TDRKH antisense RNA ...	no	no	no	no
ENSG00000269489	549	8	8	0	0	100	1		151798054	151798602	novel transcript	no	no	no	no
ENSG00000143365	6517	32	32	0	0	100	1	RORC	151806071	151831845	RAR related orphan r...	no	no	no	no
ENSG00000225556	1757	46	46	0	0	100	1	C2CD4D	151837818	151840557	C2 calcium dependent...	no	no	no	no
ENSG00000201134	102	12	12	0	0	100	1		151841736	151841837	Y RNA [Source:RFAM;A...	no	no	no	no
ENSG00000234614	506	141	145	4	2	97.2414	1	C2CD4D-AS1	151841877	151850385	C2CD4D and THEM5 ant...	no	no	no	no
ENSG00000196407	1161	122	122	0	0	100	1	THEM5	151847101	151853712	thioesterase superfa...	no	no	no	no
ENSG00000159445	6937	746	746	0	0	100	1	THEM4	151870866	151909637	thioesterase superfa...	no	no	no	no
ENSG00000197747	1012	4600	4604	4	0	99.9131	1	S100A10	151982915	151993859	S100 calcium binding...	no	no	no	no
ENSG00000229021	4109	67	67	0	0	100	1		151994531	152042774	novel transcript	no	no	no	no
ENSG00000163191	649	3186	3186	0	0	100	1	S100A11	152032506	152047907	S100 calcium binding...	no	no	no	no
ENSG00000159450	6995	56	56	0	0	100	1	TCHH	152106317	152115444	trichohyalin [Source...	no	no	no	no
ENSG00000237975	14980	26	26	0	0	100	1	FLG-AS1	152168125	152445456	FLG antisense RNA 1 ...	no	no	no	no
ENSG00000197915	9629	8	14	6	42	57.1429	1	HRNR	152212076	152224193	hornerin [Source:HGN...	no	no	no	no
ENSG00000143631	12793	35	47	12	25	74.4681	1	FLG	152302165	152325239	filaggrin [Source:HG...	no	no	no	no
ENSG00000163206	770	2	2	0	0	100	1	SMCP	152878322	152885047	sperm mitochondria a...	no	no	no	no
ENSG00000244094	675	4	4	0	0	100	1	SPRR2F	153112121	153113516	small proline rich p...	no	no	no	no
ENSG00000230779	927	2	2	0	0	100	1	RPLP0P4	153225080	153226006	ribosomal protein la...	no	no	no	no
ENSG00000203782	1245	2	2	0	0	100	1	LORICRIN	153259687	153262124	loricrin cornified e...	no	no	no	no
ENSG00000197956	971	351	351	0	0	100	1	S100A6	153534599	153536244	S100 calcium binding...	no	no	no	no
ENSG00000196420	784	17	17	0	0	100	1	S100A5	153537147	153541765	S100 calcium binding...	no	no	no	no
ENSG00000196154	946	190	190	0	0	100	1	S100A4	153543613	153550136	S100 calcium binding...	no	no	no	no
ENSG00000188015	841	8	8	0	0	100	1	S100A3	153547329	153549258	S100 calcium binding...	no	no	no	no
ENSG00000196754	1546	41	41	0	0	100	1	S100A2	153561108	153567890	S100 calcium binding...	no	no	no	no
ENSG00000285867	3176	34	34	0	0	100	1		153586813	153606283	Novel transcript	no	no	no	no
ENSG00000188643	1701	1020	1020	0	0	100	1	S100A16	153606886	153613145	S100 calcium binding...	no	no	no	no
ENSG00000189334	1277	138	142	4	2	97.1831	1	S100A14	153614255	153616986	S100 calcium binding...	no	no	no	no
ENSG00000189171	2216	396	396	0	0	100	1	S100A13	153618787	153631360	S100 calcium binding...	no	no	no	no
ENSG00000160678	3030	55	55	0	0	100	1	S100A1	153627926	153632039	S100 calcium binding...	no	no	no	no
ENSG00000272030	1054	1	1	0	0	100	1		153631438	153634397	novel transcript, an...	no	no	no	no
ENSG00000160679	5625	4522	4526	4	0	99.9116	1	CHTOP	153633982	153646306	chromatin target of ...	no	no	no	no
ENSG00000143553	1517	738	738	0	0	100	1	SNAPIN	153658703	153661852	SNAP associated prot...	no	no	no	no
ENSG00000143621	2261	19854	19862	8	0	99.9597	1	ILF2	153661788	153671028	interleukin enhancer...	no	no	no	no
ENSG00000169418	4952	1051	1055	4	0	99.6209	1	NPR1	153678688	153693992	natriuretic peptide ...	no	no	no	no
ENSG00000274940	89	2	2	0	0	100	1	MIR8083	153689705	153689793	microRNA 8083 [Sourc...	no	no	no	no
ENSG00000143624	10467	7148	7192	44	0	99.3882	1	INTS3	153728050	153774808	integrator complex s...	no	no	no	no
ENSG00000143554	5470	1208	1208	0	0	100	1	SLC27A3	153774354	153780157	solute carrier famil...	no	no	no	no
ENSG00000143614	9244	2835	2859	24	0	99.1605	1	GATAD2B	153789030	153923360	GATA zinc finger dom...	no	no	no	no
ENSG00000231827	2303	15	15	0	0	100	1		153795173	153802091	immunoglobulin super...	no	no	no	no
ENSG00000284738	1267	46	46	0	0	100	1		153923284	153935245	novel transcript, an...	no	no	no	no
ENSG00000198837	7606	6327	6353	26	0	99.5907	1	DENND4B	153929501	153946718	DENN domain containi...	no	no	no	no
ENSG00000160741	3602	2126	2130	4	0	99.8122	1	CRTC2	153947669	153958615	CREB regulated trans...	no	no	no	no
ENSG00000143570	3388	75	75	0	0	100	1	SLC39A1	153959099	153968184	solute carrier famil...	no	no	no	no
ENSG00000282386	710	42	42	0	0	100	1		153964361	153965070	novel transcript, an...	no	no	no	no
ENSG00000273026	415	19	19	0	0	100	1		153966516	153966930	novel transcript, an...	no	no	no	no
ENSG00000143578	2902	882	884	2	0	99.7738	1	CREB3L4	153967534	153974361	cAMP responsive elem...	no	no	no	no
ENSG00000143543	1482	171	171	0	0	100	1	JTB	153974269	153977674	jumping translocatio...	no	no	no	no
ENSG00000272654	1418	56	56	0	0	100	1	JTB-DT	153977727	153979160	JTB divergent transc...	no	no	no	no
ENSG00000143545	2751	1322	1326	4	0	99.6983	1	RAB13	153981617	153986358	RAB13, member RAS on...	no	no	no	no
ENSG00000177954	1028	23763	23825	62	0	99.7398	1	RPS27	153990762	153992155	ribosomal protein S2...	no	no	no	no
ENSG00000143552	5889	11	17	6	35	64.7059	1	NUP210L	153992690	154155116	nucleoporin 210 like...	no	no	no	no
ENSG00000200220	107	8	8	0	0	100	1	RNU6-179P	154039916	154040022	RNA, U6 small nuclea...	no	no	no	no
ENSG00000143549	15156	33715	34023	308	0	99.0947	1	TPM3	154155308	154194648	tropomyosin 3 [Sourc...	no	no	no	no
ENSG00000143612	2670	6027	6043	16	0	99.7352	1	C1orf43	154206696	154220637	chromosome 1 open re...	no	no	no	no
ENSG00000143569	7503	11293	11491	198	1	98.2769	1	UBAP2L	154220179	154271510	ubiquitin associated...	no	no	no	no
ENSG00000143575	2077	3578	3594	16	0	99.5548	1	HAX1	154272355	154275875	HCLS1 associated pro...	no	no	no	no
ENSG00000143515	7622	4714	4718	4	0	99.9152	1	ATP8B2	154325525	154351304	ATPase phospholipid ...	no	no	no	no
ENSG00000238365	60	9	9	0	0	100	1	RNU7-57P	154338743	154338802	RNA, U7 small nuclea...	no	no	no	no
ENSG00000160712	6453	342	342	0	0	100	1	IL6R	154405193	154469450	interleukin 6 recept...	no	no	no	no
ENSG00000169291	8740	86	86	0	0	100	1	SHE	154469772	154502412	Src homology 2 domai...	no	no	no	no
ENSG00000163239	2706	7	7	0	0	100	1	TDRD10	154502219	154548147	tudor domain contain...	no	no	no	no
ENSG00000160714	4190	2619	2627	8	0	99.6955	1	UBE2Q1	154548577	154559028	ubiquitin conjugatin...	no	no	no	no
ENSG00000229780	432	11	11	0	0	100	1	UBE2Q1-AS1	154553609	154555017	UBE2Q1 antisense RNA...	no	no	no	no
ENSG00000286391	1653	50	50	0	0	100	1		154564855	154567749	novel transcript	no	no	no	no
ENSG00000160716	5882	317	317	0	0	100	1	CHRNB2	154567778	154580013	cholinergic receptor...	no	no	no	no
ENSG00000160710	9629	27745	28072	327	1	98.8351	1	ADAR	154581695	154628013	adenosine deaminase ...	no	no	no	no
ENSG00000287064	1224	117	117	0	0	100	1		154671593	154678345	novel transcript	no	no	no	no
ENSG00000143603	13599	282	282	0	0	100	1	KCNN3	154697455	154870281	potassium calcium-ac...	no	no	no	no
ENSG00000163344	1002	792	792	0	0	100	1	PMVK	154924740	154936719	phosphomevalonate ki...	no	no	no	no
ENSG00000163346	3851	2715	2728	13	0	99.5235	1	PBXIP1	154944076	154956123	PBX homeobox interac...	no	no	no	no
ENSG00000163348	3664	2976	2976	0	0	100	1	PYGO2	154957026	154963853	pygopus family PHD f...	no	no	no	no
ENSG00000271380	799	1	1	0	0	100	1		154961825	154962623	novel transcript, an...	no	no	no	no
ENSG00000160691	4342	15694	15766	72	0	99.5433	1	SHC1	154962298	154974395	SHC adaptor protein ...	no	no	no	no
ENSG00000173207	2340	6059	6657	598	8	91.017	1	CKS1B	154974653	154979251	CDC28 protein kinase...	no	no	no	no
ENSG00000264349	91	63	63	0	0	100	1	MIR4258	154975693	154975783	microRNA 4258 [Sourc...	no	no	no	no
ENSG00000160688	4019	3128	3132	4	0	99.8723	1	FLAD1	154983338	154993111	flavin adenine dinuc...	no	no	no	no
ENSG00000163352	730	2	2	0	0	100	1	LENEP	154993586	154994315	lens epithelial prot...	no	no	no	no
ENSG00000160685	4303	1401	1401	0	0	100	1	ZBTB7B	155002630	155018523	zinc finger and BTB ...	no	no	no	no
ENSG00000163354	3071	140	140	0	0	100	1	DCST2	155018520	155033781	DC-STAMP domain cont...	no	no	no	no
ENSG00000163357	3193	69	73	4	5	94.5205	1	DCST1	155033824	155050930	DC-STAMP domain cont...	no	no	no	no
ENSG00000232093	822	35	35	0	0	100	1	DCST1-AS1	155045191	155046118	DCST1 antisense RNA ...	no	no	no	no
ENSG00000143537	6584	1986	1986	0	0	100	1	ADAM15	155050566	155062775	ADAM metallopeptidas...	no	no	no	no
ENSG00000243364	1257	627	630	3	0	99.5238	1	EFNA4	155063737	155069553	ephrin A4 [Source:HG...	no	no	no	no
ENSG00000143590	1944	257	257	0	0	100	1	EFNA3	155078837	155087538	ephrin A3 [Source:HG...	no	no	no	no
ENSG00000169242	2165	215	215	0	0	100	1	EFNA1	155127876	155134899	ephrin A1 [Source:HG...	no	no	no	no
ENSG00000169241	2340	1746	1746	0	0	100	1	SLC50A1	155135344	155138857	solute carrier famil...	no	no	no	no
ENSG00000179085	622	911	911	0	0	100	1	DPM3	155139891	155140595	dolichyl-phosphate m...	no	no	no	no
ENSG00000163463	3814	576	576	0	0	100	1	KRTCAP2	155169408	155173475	keratinocyte associa...	no	no	no	no
ENSG00000163462	4533	1124	1128	4	0	99.6454	1	TRIM46	155173787	155184971	tripartite motif con...	no	no	no	no
ENSG00000185499	4717	144	166	22	13	86.747	1	MUC1	155185824	155192916	mucin 1, cell surfac...	no	no	no	no
ENSG00000231064	2466	36	36	0	0	100	1	THBS3-AS1	155194996	155205495	THBS3 antisense RNA ...	no	no	no	no
ENSG00000169231	4623	276	279	3	1	98.9247	1	THBS3	155195588	155209051	thrombospondin 3 [So...	no	no	no	no
ENSG00000173171	3278	893	1508	615	40	59.2175	1	MTX1	155208695	155213824	metaxin 1 [Source:HG...	no	no	no	no
ENSG00000160766	3656	164	283	119	42	57.9505	1	GBAP1	155214368	155218874	glucosylceramidase b...	no	no	no	no
ENSG00000236675	838	20	899	879	97	2.22469	1	MTX1P1	155230975	155234325	metaxin 1 pseudogene...	no	no	no	no
ENSG00000177628	3648	311	432	121	28	71.9907	1	GBA1	155234452	155244699	glucosylceramidase b...	no	no	no	no
ENSG00000160767	4468	3800	3812	12	0	99.6852	1	ENTREP3	155247205	155255483	endosomal transmembr...	no	no	no	no
ENSG00000116521	2442	1893	1897	4	0	99.7891	1	SCAMP3	155255979	155262430	secretory carrier me...	no	no	no	no
ENSG00000176444	3658	3115	3115	0	0	100	1	CLK2	155262868	155278491	CDC like kinase 2 [S...	no	no	no	no
ENSG00000143630	4241	471	471	0	0	100	1	HCN3	155277463	155289848	hyperpolarization ac...	no	no	no	no
ENSG00000143627	3168	186	186	0	0	100	1	PKLR	155289293	155301438	pyruvate kinase L/R ...	no	no	no	no
ENSG00000160752	3718	5709	5771	62	1	98.9257	1	FDPS	155308748	155320666	farnesyl diphosphate...	no	no	no	no
ENSG00000225855	3516	565	567	2	0	99.6473	1	RUSC1-AS1	155316863	155324176	RUSC1 antisense RNA ...	no	no	no	no
ENSG00000160753	5429	2248	2288	40	1	98.2517	1	RUSC1	155320894	155331114	RUN and SH3 domain c...	no	no	no	no
ENSG00000116539	13381	4054	4078	24	0	99.4115	1	ASH1L	155335268	155563162	ASH1 like histone ly...	no	no	no	no
ENSG00000207144	104	10	10	0	0	100	1	RNU6-1297P	155419397	155419500	RNA, U6 small nuclea...	no	no	no	no
ENSG00000237872	1085	10	16	6	37	62.5	1	POU5F1P4	155433178	155434262	POU class 5 homeobox...	no	no	no	no
ENSG00000235919	1209	178	178	0	0	100	1	ASH1L-AS1	155562026	155563944	ASH1L antisense RNA ...	no	no	no	no
ENSG00000271267	257	22	22	0	0	100	1		155566050	155566306	ATP synthase, H+ tra...	no	no	no	no
ENSG00000223503	662	2	2	0	0	100	1		155590601	155591262	claudin 6 (CLDN6) ps...	no	no	no	no
ENSG00000232519	220	2	2	0	0	100	1		155609776	155610380	novel transcript, an...	no	no	no	no
ENSG00000125459	4192	755	1534	779	50	49.2177	1	MSTO1	155563235	155614951	misato mitochondrial...	no	no	no	no
ENSG00000246203	2505	19	109	90	82	17.4312	1		155614726	155660245	novel pseudogene	no	no	no	no
ENSG00000287839	1259	20	87	67	77	22.9885	1		155626755	155637604	novel transcript	no	no	no	no
ENSG00000163374	5001	2431	2697	266	9	90.1372	1	YY1AP1	155659443	155689000	YY1 associated prote...	no	no	no	no
ENSG00000132676	4588	4285	4365	80	1	98.1672	1	DAP3	155687960	155739010	death associated pro...	no	no	no	no
ENSG00000203761	1709	304	848	544	64	35.8491	1	MSTO2P	155745829	155750137	misato family member...	no	no	no	no
ENSG00000116580	11967	4783	5382	599	11	88.8703	1	GON4L	155749659	155859400	gon-4 like [Source:H...	no	no	no	no
ENSG00000132718	5182	1934	1934	0	0	100	1	SYT11	155859567	155885199	synaptotagmin 11 [So...	no	no	no	no
ENSG00000143622	4038	1124	1132	8	0	99.2933	1	RIT1	155897808	155911404	Ras like without CAA...	no	no	no	no
ENSG00000132680	5646	5747	5759	12	0	99.7916	1	KHDC4	155913045	155934413	KH domain containing...	no	no	no	no
ENSG00000207475	137	8	8	0	0	100	1	SNORA80E	155919909	155920045	small nucleolar RNA,...	no	no	no	no
ENSG00000173080	1450	2	2	0	0	100	1	RXFP4	155941638	155943087	relaxin family pepti...	no	no	no	no
ENSG00000116584	9155	4030	4030	0	0	100	1	ARHGEF2	155946851	156007070	Rho/Rac guanine nucl...	no	no	no	no
ENSG00000273002	2157	23	23	0	0	100	1	ARHGEF2-AS2	155978799	155982986	ARHGEF2 antisense RN...	no	no	no	no
ENSG00000224276	401	6	6	0	0	100	1	ARHGEF2-AS1	155991390	156001787	ARHGEF2 antisense RN...	no	no	no	no
ENSG00000285677	2366	16	16	0	0	100	1		156001953	156033342	Novel transcript, an...	no	no	no	no
ENSG00000163479	6643	3895	3903	8	0	99.795	1	SSR2	156009048	156020951	signal sequence rece...	no	no	no	no
ENSG00000160803	3884	3799	3911	112	2	97.1363	1	UBQLN4	156035299	156053798	ubiquilin 4 [Source:...	no	no	no	no
ENSG00000116586	1404	1288	1288	0	0	100	1	LAMTOR2	156054782	156058506	late endosomal/lysos...	no	no	no	no
ENSG00000132698	1689	1995	1995	0	0	100	1	RAB25	156061160	156070504	RAB25, member RAS on...	no	no	no	no
ENSG00000254726	6591	7181	7221	40	0	99.4461	1	MEX3A	156072013	156082465	mex-3 RNA binding fa...	no	no	no	no
ENSG00000160789	8149	2207	2219	12	0	99.4592	1	LMNA	156082573	156140081	lamin A/C [Source:HG...	no	no	no	no
ENSG00000196189	6771	565	565	0	0	100	1	SEMA4A	156147366	156177752	semaphorin 4A [Sourc...	no	no	no	no
ENSG00000160785	7293	1668	1680	12	0	99.2857	1	SLC25A44	156193932	156212796	solute carrier famil...	no	no	no	no
ENSG00000160783	2520	1126	1126	0	0	100	1	PMF1	156212993	156240042	polyamine modulated ...	no	no	no	no
ENSG00000242252	964	18	18	0	0	100	1	BGLAP	156242184	156243317	bone gamma-carboxygl...	no	no	no	no
ENSG00000160781	2531	268	268	0	0	100	1	PAQR6	156243320	156248117	progestin and adipoQ...	no	no	no	no
ENSG00000198952	5304	9926	9962	36	0	99.6386	1	SMG5	156249224	156282825	SMG5 nonsense mediat...	no	no	no	no
ENSG00000163472	3032	137	137	0	0	100	1	TMEM79	156282935	156293185	transmembrane protei...	no	no	no	no
ENSG00000198715	3471	1355	1355	0	0	100	1	GLMP	156290089	156295689	glycosylated lysosom...	no	no	no	no
ENSG00000163468	3864	24341	24431	90	0	99.6316	1	CCT3	156308968	156367873	chaperonin containin...	no	no	no	no
ENSG00000163467	1115	68	68	0	0	100	1	TSACC	156337314	156346995	TSSK6 activating coc...	no	no	no	no
ENSG00000132677	3384	102	102	0	0	100	1	RHBG	156369211	156385219	Rh family B glycopro...	no	no	no	no
ENSG00000237390	5586	4	4	0	0	100	1		156388226	156395609	novel transcript	no	no	no	no
ENSG00000125462	13742	538	538	0	0	100	1	MIR9-1HG	156404250	156456763	MIR9-1 host gene [So...	no	no	no	no
ENSG00000116604	6351	2314	2318	4	0	99.8274	1	MEF2D	156463727	156500779	myocyte enhancer fac...	no	no	no	no
ENSG00000183856	6742	3317	3321	4	0	99.8796	1	IQGAP3	156525405	156572604	IQ motif containing ...	no	no	no	no
ENSG00000163382	1933	3029	3109	80	2	97.4268	1	NAXE	156591756	156609507	NAD(P)HX epimerase [...	no	no	no	no
ENSG00000160818	4623	3618	3662	44	1	98.7985	1	GPATCH4	156594301	156601496	G-patch domain conta...	no	no	no	no
ENSG00000272971	547	11	11	0	0	100	1		156614742	156615288	novel transcript	no	no	no	no
ENSG00000132702	2204	106	106	0	0	100	1	HAPLN2	156619331	156625725	hyaluronan and prote...	no	no	no	no
ENSG00000132692	4765	161	161	0	0	100	1	BCAN	156641390	156659532	brevican [Source:HGN...	no	no	no	no
ENSG00000272405	3222	31	31	0	0	100	1		156641666	156644887	novel transcript, an...	no	no	no	no
ENSG00000229953	758	11	11	0	0	100	1	BCAN-AS2	156646507	156661424	BCAN antisense RNA 2...	no	no	no	no
ENSG00000132688	5568	21789	21839	50	0	99.7711	1	NES	156668763	156677407	nestin [Source:HGNC ...	no	no	no	no
ENSG00000237588	4122	8	8	0	0	100	1		156687695	156691997	novel transcript	no	no	no	no
ENSG00000285570	956	18	18	0	0	100	1		156689676	156704757	Novel transcript, an...	no	no	no	no
ENSG00000143320	1082	3748	3752	4	0	99.8934	1	CRABP2	156699606	156705816	cellular retinoic ac...	no	no	no	no
ENSG00000223356	433	4	4	0	0	100	1		156712212	156713174	novel transcript	no	no	no	no
ENSG00000143319	5229	3582	3654	72	1	98.0296	1	ISG20L2	156721891	156728766	interferon stimulate...	no	no	no	no
ENSG00000143303	3169	1093	1093	0	0	100	1	METTL25B	156728442	156736960	methyltransferase li...	no	no	no	no
ENSG00000143314	1695	1272	1302	30	2	97.6959	1	MRPL24	156737303	156741590	mitochondrial riboso...	no	no	no	no
ENSG00000143321	3674	23550	23614	64	0	99.729	1	HDGF	156742109	156766925	heparin binding grow...	no	no	no	no
ENSG00000143294	4071	4214	4250	36	0	99.1529	1	PRCC	156750610	156800815	proline rich mitotic...	no	no	no	no
ENSG00000027869	2498	454	454	0	0	100	1	SH2D2A	156806243	156816848	SH2 domain containin...	no	no	no	no
ENSG00000187800	5530	144	144	0	0	100	1	PEAR1	156893698	156916429	platelet endothelial...	no	no	no	no
ENSG00000160838	2649	6	6	0	0	100	1	LRRC71	156920632	156933094	leucine rich repeat ...	no	no	no	no
ENSG00000132694	9322	4585	4601	16	0	99.6522	1	ARHGEF11	156934840	157045742	Rho guanine nucleoti...	no	no	no	no
ENSG00000253831	2100	2	12	10	83	16.6667	1	ETV3L	157092043	157112412	ETS variant transcri...	no	no	no	no
ENSG00000117036	6707	2180	2214	34	1	98.4643	1	ETV3	157121191	157138474	ETS variant transcri...	no	no	no	no
ENSG00000235700	310	2	2	0	0	100	1	CYCSP52	157128362	157128671	CYCS pseudogene 52 [...	no	no	no	no
ENSG00000229961	5817	22	22	0	0	100	1		157182860	157187081	novel SLAM family me...	no	no	no	no
ENSG00000271736	1647	16	16	0	0	100	1	LINC02772	157273760	157283968	long intergenic non-...	no	no	no	no
ENSG00000286073	1121	2	2	0	0	100	1		157287267	157310655	SLAM family member 5...	no	no	no	no
ENSG00000143297	12414	99	99	0	0	100	1	FCRL5	157513377	157552515	Fc receptor like 5 [...	no	no	no	no
ENSG00000163534	3950	2	2	0	0	100	1	FCRL1	157794403	157820120	Fc receptor like 1 [...	no	no	no	no
ENSG00000183853	7872	3500	3512	12	0	99.6583	1	KIRREL1	157993273	158100262	kirre like nephrin f...	no	no	no	no
ENSG00000158473	4359	99	99	0	0	100	1	CD1D	158178030	158186427	CD1d molecule [Sourc...	no	no	no	no
ENSG00000158481	2442	2	2	0	0	100	1	CD1C	158289923	158294774	CD1c molecule [Sourc...	no	no	no	no
ENSG00000231434	2167	3	3	0	0	100	1	HSP90AA3P	158523672	158525838	heat shock protein 9...	no	no	no	no
ENSG00000163565	5294	84	128	44	34	65.625	1	IFI16	158999968	159055155	interferon gamma ind...	no	no	no	no
ENSG00000163568	1874	183	187	4	2	97.861	1	AIM2	159061599	159187843	absent in melanoma 2...	no	no	no	no
ENSG00000233473	663	9	9	0	0	100	1	RAD1P2	159081133	159081795	RAD1 pseudogene 2 [S...	no	no	no	no
ENSG00000162706	3847	215	215	0	0	100	1	CADM3	159171609	159203313	cell adhesion molecu...	no	no	no	no
ENSG00000225670	5208	26	26	0	0	100	1	CADM3-AS1	159194325	159207973	CADM3 antisense RNA ...	no	no	no	no
ENSG00000213088	2106	17	17	0	0	100	1	ACKR1	159203307	159206500	atypical chemokine r...	no	no	no	no
ENSG00000158716	827	805	809	4	0	99.5056	1	DUSP23	159780932	159782543	dual specificity pho...	no	no	no	no
ENSG00000272668	7134	16	16	0	0	100	1		159854870	159867685	novel transcript, an...	no	no	no	no
ENSG00000213085	2627	28	28	0	0	100	1	CFAP45	159872364	159900165	cilia and flagella a...	no	no	no	no
ENSG00000158710	2262	4635	4647	12	0	99.7418	1	TAGLN2	159918107	159925507	transgelin 2 [Source...	no	no	no	no
ENSG00000085552	6637	2850	2858	8	0	99.7201	1	IGSF9	159927039	159945613	immunoglobulin super...	no	no	no	no
ENSG00000177807	6252	59	59	0	0	100	1	KCNJ10	159998651	160070160	potassium inwardly r...	no	no	no	no
ENSG00000143315	7038	688	688	0	0	100	1	PIGM	160024953	160031990	phosphatidylinositol...	no	no	no	no
ENSG00000162728	4202	34	34	0	0	100	1	KCNJ9	160081538	160090563	potassium inwardly r...	no	no	no	no
ENSG00000162729	2592	4707	4723	16	0	99.6612	1	IGSF8	160091340	160098943	immunoglobulin super...	no	no	no	no
ENSG00000018625	6298	6642	6686	44	0	99.3419	1	ATP1A2	160115759	160143591	ATPase Na+/K+ transp...	no	no	no	no
ENSG00000132681	6271	58	58	0	0	100	1	ATP1A4	160151586	160186980	ATPase Na+/K+ transp...	no	no	no	no
ENSG00000143318	2157	56	56	0	0	100	1	CASQ1	160190575	160201886	calsequestrin 1 [Sou...	no	no	no	no
ENSG00000227741	1578	16	16	0	0	100	1		160202199	160208869	novel transcript	no	no	no	no
ENSG00000162734	2763	5089	5103	14	0	99.7257	1	PEA15	160205380	160215376	proliferation and ap...	no	no	no	no
ENSG00000132716	7605	2836	2840	4	0	99.8592	1	DCAF8	160215715	160262549	DDB1 and CUL4 associ...	no	no	no	no
ENSG00000228606	1374	58	58	0	0	100	1	DCAF8-DT	160261731	160263328	DCAF8 divergent tran...	no	no	no	no
ENSG00000224261	886	3	3	0	0	100	1	RPSAP18	160266340	160267225	ribosomal protein SA...	no	no	no	no
ENSG00000162735	4466	2540	2548	8	0	99.686	1	PEX19	160276807	160286348	peroxisomal biogenes...	no	no	no	no
ENSG00000122218	7688	11199	11235	36	0	99.6796	1	COPA	160288594	160343566	COPI coat complex su...	no	no	no	no
ENSG00000235082	304	3	3	0	0	100	1	SUMO1P3	160317403	160317706	SUMO1 pseudogene 3 [...	no	no	no	no
ENSG00000162736	4131	3368	3400	32	0	99.0588	1	NCSTN	160343294	160358952	nicastrin [Source:HG...	no	no	no	no
ENSG00000171786	2557	64	64	0	0	100	1	NHLH1	160367071	160372846	nescient helix-loop-...	no	no	no	no
ENSG00000162738	5354	7859	8001	142	1	98.2252	1	VANGL2	160400564	160428670	VANGL planar cell po...	no	no	no	no
ENSG00000228863	4121	3	3	0	0	100	1		160670778	160699761	novel transcript, an...	no	no	no	no
ENSG00000117091	3254	8	8	0	0	100	1	CD48	160678746	160711831	CD48 molecule [Sourc...	no	no	no	no
ENSG00000122224	9118	1	1	0	0	100	1	LY9	160796074	160828261	lymphocyte antigen 9...	no	no	no	no
ENSG00000179914	1492	2	2	0	0	100	1	ITLN1	160876540	160885180	intelectin 1 [Source...	no	no	no	no
ENSG00000213080	1097	16	20	4	20	80	1		160894980	160896076	spermine synthase (S...	no	no	no	no
ENSG00000198358	2136	6	6	0	0	100	1		160932465	160949922	antisense to ITLN2	no	no	no	no
ENSG00000233691	590	14	14	0	0	100	1		160935537	160936126	pseudogene similar t...	no	no	no	no
ENSG00000158764	1646	119	119	0	0	100	1	ITLN2	160945025	160954809	intelectin 2 [Source...	no	no	no	no
ENSG00000158769	5061	9783	9873	90	0	99.0884	1	F11R	160995211	161021343	F11 receptor [Source...	no	no	no	no
ENSG00000270149	2114	6	6	0	0	100	1		160997957	161038962	novel transcript, TS...	no	no	no	no
ENSG00000215845	1197	1139	1139	0	0	100	1	TSTD1	161037631	161038977	thiosulfate sulfurtr...	no	no	no	no
ENSG00000158773	2336	2469	2485	16	0	99.3561	1	USF1	161039251	161045977	upstream transcripti...	no	no	no	no
ENSG00000186517	5064	49	49	0	0	100	1	ARHGAP30	161046946	161069970	Rho GTPase activatin...	no	no	no	no
ENSG00000143217	3458	46	46	0	0	100	1	NECTIN4	161070998	161089558	nectin cell adhesion...	no	no	no	no
ENSG00000162755	1720	270	270	0	0	100	1	KLHDC9	161098361	161100346	kelch domain contain...	no	no	no	no
ENSG00000143256	621	2934	2934	0	0	100	1	PFDN2	161100556	161118055	prefoldin subunit 2 ...	no	no	no	no
ENSG00000158793	3794	1170	1176	6	0	99.4898	1	NIT1	161118086	161125445	nitrilase 1 [Source:...	no	no	no	no
ENSG00000158796	2821	1300	1323	23	1	98.2615	1	DEDD	161120974	161132688	death effector domai...	no	no	no	no
ENSG00000143222	2100	2070	2070	0	0	100	1	UFC1	161152776	161158856	ubiquitin-fold modif...	no	no	no	no
ENSG00000224985	379	6	6	0	0	100	1		161153760	161159349	novel transcript	no	no	no	no
ENSG00000143258	3764	1755	1779	24	1	98.6509	1	USP21	161159450	161165723	ubiquitin specific p...	no	no	no	no
ENSG00000143224	4725	1194	1194	0	0	100	1	PPOX	161166056	161178013	protoporphyrinogen o...	no	no	no	no
ENSG00000158850	3890	1659	1663	4	0	99.7595	1	B4GALT3	161171310	161177968	beta-1,4-galactosylt...	no	no	no	no
ENSG00000158859	10338	795	795	0	0	100	1	ADAMTS4	161184302	161199054	ADAM metallopeptidas...	no	no	no	no
ENSG00000158864	3658	6805	6869	64	0	99.0683	1	NDUFS2	161197104	161214723	NADH:ubiquinone oxid...	no	no	no	no
ENSG00000158869	964	10	10	0	0	100	1	FCER1G	161215234	161220699	Fc epsilon receptor ...	no	no	no	no
ENSG00000158882	3291	507	531	24	4	95.4802	1	TOMM40L	161225939	161230746	translocase of outer...	no	no	no	no
ENSG00000143257	3247	64	64	0	0	100	1	NR1I3	161229666	161238244	nuclear receptor sub...	no	no	no	no
ENSG00000248485	1406	70	74	4	5	94.5946	1	PCP4L1	161258745	161285450	Purkinje cell protei...	no	no	no	no
ENSG00000158887	2150	212	212	0	0	100	1	MPZ	161304735	161309968	myelin protein zero ...	no	no	no	no
ENSG00000143252	3709	3928	4060	132	3	96.7488	1	SDHC	161314381	161363206	succinate dehydrogen...	no	no	no	no
ENSG00000188931	774	555	555	0	0	100	1	CFAP126	161364733	161367876	cilia and flagella a...	no	no	no	no
ENSG00000236484	652	2	2	0	0	100	1	RRM2P2	161378707	161379358	ribonucleotide reduc...	no	no	no	no
ENSG00000283696	997	10	10	0	0	100	1		161399409	161422424	novel transcript	no	no	no	no
ENSG00000288093	1871	14	14	0	0	100	1		161399998	161401868	novel transcript	no	no	no	no
ENSG00000215840	884	8	8	0	0	100	1		161406068	161407082	ribosomal protein S2...	no	no	no	no
ENSG00000143226	5422	34	46	12	26	73.913	1	FCGR2A	161505430	161524013	Fc gamma receptor II...	no	no	no	no
ENSG00000244682	3580	22	23	1	4	95.6522	1	FCGR2C	161581339	161605662	Fc gamma receptor II...	no	no	no	no
ENSG00000225217	1927	16	16	0	0	100	1	HSPA7	161606291	161608217	heat shock protein f...	no	no	no	no
ENSG00000072694	6651	10	10	0	0	100	1	FCGR2B	161663143	161678654	Fc gamma receptor II...	no	no	no	no
ENSG00000162746	2592	4	4	0	0	100	1	FCRLB	161721544	161728143	Fc receptor like B [...	no	no	no	no
ENSG00000081721	1762	779	787	8	1	98.9835	1	DUSP12	161749758	161757238	dual specificity pho...	no	no	no	no
ENSG00000226889	575	8	8	0	0	100	1	ATF6-DT	161749452	161766227	ATF6 divergent trans...	no	no	no	no
ENSG00000118217	7864	2907	2913	6	0	99.794	1	ATF6	161766298	161977574	activating transcrip...	no	no	no	no
ENSG00000229808	1364	18	18	0	0	100	1		161890833	161892196	proteasome (prosome,...	no	no	no	no
ENSG00000162745	3415	1001	1001	0	0	100	1	OLFML2B	161983192	162023869	olfactomedin like 2B...	no	no	no	no
ENSG00000198929	7854	654	654	0	0	100	1	NOS1AP	162069691	162370475	nitric oxide synthas...	no	no	no	no
ENSG00000285636	2208	2	2	0	0	100	1		162146709	162175243	Novel transcript, an...	no	no	no	no
ENSG00000252262	100	3	3	0	0	100	1	RNA5SP61	162338643	162338742	RNA, 5S ribosomal ps...	no	no	no	no
ENSG00000171722	1848	26	26	0	0	100	1	SPATA46	162373203	162376854	spermatogenesis asso...	no	no	no	no
ENSG00000239887	4313	1375	1379	4	0	99.7099	1	C1orf226	162378841	162386812	chromosome 1 open re...	no	no	no	no
ENSG00000152332	9248	6375	6407	32	0	99.5005	1	UHMK1	162497251	162529631	U2AF homology motif ...	no	no	no	no
ENSG00000117143	3437	2563	2567	4	0	99.8442	1	UAP1	162561722	162601240	UDP-N-acetylglucosam...	no	no	no	no
ENSG00000272574	505	58	58	0	0	100	1		162593103	162593754	novel transcript, se...	no	no	no	no
ENSG00000162733	11099	822	826	4	0	99.5157	1	DDR2	162631373	162787405	discoidin domain rec...	no	no	no	no
ENSG00000132196	4778	1499	1549	50	3	96.7721	1	HSD17B7	162790702	162812823	hydroxysteroid 17-be...	no	no	no	no
ENSG00000117152	4836	6	6	0	0	100	1	RGS4	163068775	163076802	regulator of G prote...	no	no	no	no
ENSG00000143248	6624	4497	4509	12	0	99.7339	1	RGS5	163111121	163321791	regulator of G prote...	no	no	no	no
ENSG00000232995	3626	40	40	0	0	100	1		163244505	163321894	regulator of G prote...	no	no	no	no
ENSG00000143228	3362	3055	3063	8	0	99.7388	1	NUF2	163266576	163355764	NUF2 component of ND...	no	no	no	no
ENSG00000185630	21370	10497	10575	78	0	99.2624	1	PBX1	164555584	164899296	PBX homeobox 1 [Sour...	no	no	no	no
ENSG00000207082	107	3	3	0	0	100	1	RNU6-171P	164639565	164639671	RNA, U6 small nuclea...	no	no	no	no
ENSG00000269887	715	18	18	0	0	100	1		164680085	164680799	novel transcript, se...	no	no	no	no
ENSG00000143198	8052	3146	3234	88	2	97.2789	1	MGST3	165631213	165661796	microsomal glutathio...	no	no	no	no
ENSG00000143149	3308	4149	4153	4	0	99.9037	1	ALDH9A1	165662216	165698562	aldehyde dehydrogena...	no	no	no	no
ENSG00000215838	1854	2	2	0	0	100	1		165698750	165709968	carbonic anhydrase X...	no	no	no	no
ENSG00000143183	5584	2102	2122	20	0	99.0575	1	TMCO1	165724293	165827755	transmembrane and co...	no	no	no	no
ENSG00000224358	2150	27	27	0	0	100	1	TMCO1-AS1	165768929	165775176	TMCO1 antisense RNA ...	no	no	no	no
ENSG00000143179	6984	3975	3985	10	0	99.7491	1	UCK2	165827614	165911618	uridine-cytidine kin...	no	no	no	no
ENSG00000236364	2952	154	154	0	0	100	1		165889725	165900995	novel transcript, an...	no	no	no	no
ENSG00000188859	5719	249	249	0	0	100	1	FAM78B	166057426	166167001	family with sequence...	no	no	no	no
ENSG00000203307	594	4	4	0	0	100	1	FAM78B-AS1	166081183	166087483	FAM78B antisense RNA...	no	no	no	no
ENSG00000215835	1969	2	2	0	0	100	1		166275629	166277597	Ewing sarcoma breakp...	no	no	no	no
ENSG00000232341	1282	8	8	0	0	100	1	RPL4P2	166747379	166748660	ribosomal protein L4...	no	no	no	no
ENSG00000143157	8463	4488	4520	32	0	99.292	1	POGK	166839447	166856359	pogo transposable el...	no	no	no	no
ENSG00000152382	2900	1573	1577	4	0	99.7464	1	TADA1	166856510	166876264	transcriptional adap...	no	no	no	no
ENSG00000225171	462	10	10	0	0	100	1	DUTP6	166868748	166869209	deoxyuridine triphos...	no	no	no	no
ENSG00000143195	13946	184	184	0	0	100	1	ILDR2	166895711	166975540	immunoglobulin like ...	no	no	no	no
ENSG00000143194	3148	2	2	0	0	100	1	MAEL	166975582	167022214	maelstrom spermatoge...	no	no	no	no
ENSG00000143167	2946	14	18	4	22	77.7778	1	GPA33	167052836	167166479	glycoprotein A33 [So...	no	no	no	no
ENSG00000198842	4274	2	2	0	0	100	1	STYXL2	167094075	167129165	serine/threonine/tyr...	no	no	no	no
ENSG00000213068	415	12	12	0	0	100	1		167162423	167162837	ribosomal protein S1...	no	no	no	no
ENSG00000272205	682	32	32	0	0	100	1	POU2F1-DT	167219822	167220588	POU2F1 divergent tra...	no	no	no	no
ENSG00000143190	16031	11658	11776	118	1	98.998	1	POU2F1	167220876	167427345	POU class 2 homeobox...	no	no	no	no
ENSG00000272033	1893	54	54	0	0	100	1		167379108	167381000	novel transcript, se...	no	no	no	no
ENSG00000198821	4034	28	28	0	0	100	1	CD247	167425027	167518640	CD247 molecule [Sour...	no	no	no	no
ENSG00000143162	3286	1724	1724	0	0	100	1	CREG1	167529117	167553805	cellular repressor o...	no	no	no	no
ENSG00000198771	8165	84	84	0	0	100	1	RCSD1	167630093	167708696	RCSD domain containi...	no	no	no	no
ENSG00000197965	7069	7684	7761	77	0	99.0079	1	MPZL1	167721192	167791919	myelin protein zero ...	no	no	no	no
ENSG00000143199	6141	11	11	0	0	100	1	ADCY10	167809386	167914215	adenylate cyclase 10...	no	no	no	no
ENSG00000250762	266	8	8	0	0	100	1		167819898	167820248	chromosome 14 open r...	no	no	no	no
ENSG00000232194	718	4	4	0	0	100	1		167820406	167821224	novel transcript	no	no	no	no
ENSG00000143158	2638	571	573	2	0	99.651	1	MPC2	167916675	167937072	mitochondrial pyruva...	no	no	no	no
ENSG00000143164	6306	1347	1347	0	0	100	1	DCAF6	167935783	168075843	DDB1 and CUL4 associ...	no	no	no	no
ENSG00000224837	522	2	1380	1378	99	0.144928	1	GCSHP5	168055901	168056422	glycine cleavage sys...	no	no	no	no
ENSG00000143147	11224	1430	1430	0	0	100	1	GPR161	168079542	168137667	G protein-coupled re...	no	no	no	no
ENSG00000143155	3186	2522	2574	52	2	97.9798	1	TIPRL	168178962	168202109	TOR signaling pathwa...	no	no	no	no
ENSG00000213064	11217	1273	1283	10	0	99.2206	1	SFT2D2	168225938	168253021	SFT2 domain containi...	no	no	no	no
ENSG00000206880	107	3	3	0	0	100	1	RNU6-1310P	168263375	168263481	RNA, U6 small nuclea...	no	no	no	no
ENSG00000143178	3810	181	181	0	0	100	1	TBX19	168280877	168314426	T-box transcription ...	no	no	no	no
ENSG00000227722	1678	2	2	0	0	100	1		168317497	168376876	dynactin 4 pseudogen...	no	no	no	no
ENSG00000227777	618	8	8	0	0	100	1	RPL7AP19	168542737	168543354	ribosomal protein L7...	no	no	no	no
ENSG00000143184	1227	36	36	0	0	100	1	XCL1	168576605	168582069	X-C motif chemokine ...	no	no	no	no
ENSG00000229757	787	7	7	0	0	100	1	RPL7AP21	168578653	168579439	ribosomal protein L7...	no	no	no	no
ENSG00000225826	1532	8	8	0	0	100	1	LINC00626	168784012	168792886	long intergenic non-...	no	no	no	no
ENSG00000143153	2865	3760	3798	38	1	98.9995	1	ATP1B1	169105697	169310992	ATPase Na+/K+ transp...	no	no	no	no
ENSG00000143156	5718	864	876	12	1	98.6301	1	NME7	169132531	169367948	NME/NM23 family memb...	no	no	no	no
ENSG00000117475	3820	877	877	0	0	100	1	BLZF1	169367970	169396540	basic leucine zipper...	no	no	no	no
ENSG00000117477	3961	156	156	0	0	100	1	CCDC181	169394870	169460669	coiled-coil domain c...	no	no	no	no
ENSG00000117479	4364	3236	3254	18	0	99.4468	1	SLC19A2	169463909	169485944	solute carrier famil...	no	no	no	no
ENSG00000234604	100	40	40	0	0	100	1		169474060	169474159	ATP synthase 6 (MTAT...	no	no	no	no
ENSG00000213062	14107	498	498	0	0	100	1		169486076	169500182	novel transcript	no	no	no	no
ENSG00000198734	9373	59	59	0	0	100	1	F5	169511951	169586588	coagulation factor V...	no	no	no	no
ENSG00000174175	3490	3	3	0	0	100	1	SELP	169588849	169630193	selectin P [Source:H...	no	no	no	no
ENSG00000000460	5970	1140	1172	32	2	97.2696	1	C1orf112	169662007	169854080	chromosome 1 open re...	no	no	no	no
ENSG00000188404	2731	20	20	0	0	100	1	SELL	169690665	169711702	selectin L [Source:H...	no	no	no	no
ENSG00000171806	1575	547	547	0	0	100	1	METTL18	169792529	169794963	methyltransferase li...	no	no	no	no
ENSG00000000457	6883	382	382	0	0	100	1	SCYL3	169849631	169894267	SCY1 like pseudokina...	no	no	no	no
ENSG00000239494	297	19	19	0	0	100	1	RN7SL333P	169859756	169860052	RNA, 7SL, cytoplasmi...	no	no	no	no
ENSG00000075945	4978	275	275	0	0	100	1	KIFAP3	169921326	170085208	kinesin associated p...	no	no	no	no
ENSG00000203740	2322	44	44	0	0	100	1	NTMT2	170145959	170168866	N-terminal Xaa-Pro-L...	no	no	no	no
ENSG00000233985	2796	2	2	0	0	100	1	LINC01681	170173865	170304358	long intergenic non-...	no	no	no	no
ENSG00000231407	5647	12	12	0	0	100	1	GORAB-AS1	170460453	170532647	GORAB antisense RNA ...	no	no	no	no
ENSG00000120370	4159	535	535	0	0	100	1	GORAB	170531819	170553834	golgin, RAB6 interac...	no	no	no	no
[truncated: 25,192 more rows]

## Sheet: JS2_CloneB
Chr Y Simulation
Geneid	Gene Length	Unique reads	Total Reads	Multimapping reads	Mutlimapping reads over total reads (%)	Unique reads over total reads (%)	chromosome_name	hgnc_symbol	start_position	end_position	description	isPAR	escape_Tukianien	variable_Tukianien	inactive_Tukianien
ENSG00000227232	1351	546	2489	1943	78	21.9365	1	WASH7P	14404	29570	WASP family homolog ...	no	no	no	no
ENSG00000278267	68	38	56	18	32	67.8571	1	MIR6859-1	17369	17436	microRNA 6859-1 [Sou...	no	no	no	no
ENSG00000243485	1021	14	68	54	79	20.5882	1	MIR1302-2HG	29554	31109	MIR1302-2 host gene ...	no	no	no	no
ENSG00000233750	3812	46	129	83	64	35.6589	1	CICP27	131025	134836	capicua transcriptio...	no	no	no	no
ENSG00000268903	755	896	3509	2613	74	25.5343	1		135141	135895	novel pseudogene	no	no	no	no
ENSG00000269981	284	823	1020	197	19	80.6863	1		137682	137965	novel pseudogene	no	no	no	no
ENSG00000239906	323	12	652	640	98	1.84049	1		139790	140339	novel transcript	no	no	no	no
ENSG00000241860	7559	162	4304	4142	96	3.76394	1		141474	173862	novel transcript	no	no	no	no
ENSG00000222623	104	10	61	51	83	16.3934	1	RNU6-1100P	157784	157887	RNA, U6 small nuclea...	no	no	no	no
ENSG00000279457	1397	639	2570	1931	75	24.8638	1	WASH9P	185217	195411	WAS protein family h...	no	no	no	no
ENSG00000273874	68	2	9	7	77	22.2222	1	MIR6859-2	187891	187958	microRNA 6859-2 [Sou...	no	no	no	no
ENSG00000228463	8224	6	123	117	95	4.87805	1		257864	359681	ribosomal protein L2...	no	no	no	no
ENSG00000236679	385	2	35	33	94	5.71429	1	RPL23AP24	347982	348366	ribosomal protein L2...	no	no	no	no
ENSG00000237094	6204	1132	6871	5739	83	16.475	1		485026	485208	pseudogene similar t...	no	no	no	no
ENSG00000250575	1239	10	3138	3128	99	0.318674	1		491225	493241	novel pseudogene	no	no	no	no
ENSG00000230021	5495	57	659	602	91	8.64947	1		586071	827796	septin 14 (SEPT14) p...	no	no	no	no
ENSG00000225972	372	3	206	203	98	1.45631	1	MTND1P23	629062	629433	MT-ND1 pseudogene 23...	no	no	no	no
ENSG00000225630	1044	355	24160	23805	98	1.46937	1	MTND2P28	629640	630683	MT-ND2 pseudogene 28...	no	no	no	no
ENSG00000237973	1543	749	15839	15090	95	4.72883	1	MTCO1P12	631074	632616	MT-CO1 pseudogene 12...	no	no	no	no
ENSG00000229344	682	8	28	20	71	28.5714	1	MTCO2P12	632757	633438	MT-CO2 pseudogene 12...	no	no	no	no
ENSG00000240409	207	7	7	0	0	100	1	MTATP8P1	633535	633741	MT-ATP8 pseudogene 1...	no	no	no	no
ENSG00000248527	681	5474	15380	9906	64	35.5917	1	MTATP6P1	633696	634376	MT-ATP6 pseudogene 1...	no	no	no	no
ENSG00000198744	547	5	25	20	80	20	1	MTCO3P12	634376	634922	MT-CO3 pseudogene 12...	no	no	no	no
ENSG00000229376	2455	3	19	16	84	15.7895	1	CICP3	722092	724903	capicua transcriptio...	no	no	no	no
ENSG00000228327	6432	571	7276	6705	92	7.84772	1		764723	774280	general transcriptio...	no	no	no	no
ENSG00000223181	104	1	1	0	0	100	1	RNU6-1199P	758233	758336	RNA, U6 small nuclea...	no	no	no	no
ENSG00000229905	456	1	4	3	75	25	1		760911	761989	novel transcript	no	no	no	no
ENSG00000237491	8413	234	253	19	7	92.4901	1	LINC01409	778747	810065	long intergenic non-...	no	no	no	no
ENSG00000230092	872	3	4	1	25	75	1		805799	810161	F-box only protein 2...	no	no	no	no
ENSG00000177757	1947	8	8	0	0	100	1	FAM87B	817371	819837	family with sequence...	no	no	no	no
ENSG00000228794	15682	398	446	48	10	89.2377	1	LINC01128	825138	859446	long intergenic non-...	no	no	no	no
ENSG00000225880	1317	82	82	0	0	100	1	LINC00115	824228	827539	long intergenic non-...	no	no	no	no
ENSG00000288531	3292	2	12	10	83	16.6667	1		860226	868202	novel transcript	no	no	no	no
ENSG00000272438	351	9	9	0	0	100	1		904834	915976	novel transcript	no	no	no	no
ENSG00000230699	3043	23	23	0	0	100	1		911435	914948	novel transcript	no	no	no	no
ENSG00000223764	4152	22	22	0	0	100	1	LINC02593	916865	921016	long intergenic non-...	no	no	no	no
ENSG00000187634	4173	2	2	0	0	100	1	SAMD11	923923	944575	sterile alpha motif ...	no	no	no	no
ENSG00000188976	5540	5275	5275	0	0	100	1	NOC2L	944203	959309	NOC2 like nucleolar ...	no	no	no	no
ENSG00000187961	3402	1950	1962	12	0	99.3884	1	KLHL17	960584	965719	kelch like family me...	no	no	no	no
ENSG00000187583	3451	43	43	0	0	100	1	PLEKHN1	966482	975865	pleckstrin homology ...	no	no	no	no
ENSG00000272512	2086	4	4	0	0	100	1		995966	998051	novel transcript	no	no	no	no
ENSG00000188290	1118	50	50	0	0	100	1	HES4	998962	1000172	hes family bHLH tran...	no	no	no	no
ENSG00000187608	867	617	617	0	0	100	1	ISG15	1001138	1014540	ISG15 ubiquitin like...	no	no	no	no
ENSG00000188157	10761	13612	13659	47	0	99.6559	1	AGRN	1020120	1056118	agrin [Source:HGNC S...	no	no	no	no
ENSG00000217801	2203	98	98	0	0	100	1		1063079	1069355	protein tyrosine pho...	no	no	no	no
ENSG00000273443	829	7	7	0	0	100	1		1062208	1063288	novel transcript	no	no	no	no
ENSG00000237330	1900	2	2	0	0	100	1	RNF223	1070967	1074306	ring finger protein ...	no	no	no	no
ENSG00000131591	6322	1051	1071	20	1	98.1326	1	C1orf159	1081818	1116361	chromosome 1 open re...	no	no	no	no
ENSG00000285812	1095	8	8	0	0	100	1		1097585	1104598	novel transcript, an...	no	no	no	no
ENSG00000223823	1620	2	2	0	0	100	1	LINC01342	1137017	1144056	long intergenic non-...	no	no	no	no
ENSG00000207730	95	2	2	0	0	100	1	MIR200B	1167104	1167198	microRNA 200b [Sourc...	no	no	no	no
ENSG00000198976	83	2	2	0	0	100	1	MIR429	1169005	1169087	microRNA 429 [Source...	no	no	no	no
ENSG00000272141	987	27	27	0	0	100	1		1169357	1170343	novel transcript	no	no	no	no
ENSG00000205231	3532	20	20	0	0	100	1	TTLL10-AS1	1173056	1179555	TTLL10 antisense RNA...	no	no	no	no
ENSG00000162571	3998	68	70	2	2	97.1429	1	TTLL10	1173880	1197936	tubulin tyrosine lig...	no	no	no	no
ENSG00000186891	1271	16	16	0	0	100	1	TNFRSF18	1203508	1206592	TNF receptor superfa...	no	no	no	no
ENSG00000186827	1722	6	6	0	0	100	1	TNFRSF4	1211326	1214153	TNF receptor superfa...	no	no	no	no
ENSG00000078808	4745	3532	3537	5	0	99.8586	1	SDF4	1216931	1232031	stromal cell derived...	no	no	no	no
ENSG00000176022	2805	723	723	0	0	100	1	B3GALT6	1232237	1235041	beta-1,3-galactosylt...	no	no	no	no
ENSG00000184163	1794	278	278	0	0	100	1	C1QTNF12	1242446	1246722	C1q and TNF related ...	no	no	no	no
ENSG00000260179	1558	45	45	0	0	100	1		1249777	1251334	novel transcript	no	no	no	no
ENSG00000160087	4691	2244	2247	3	0	99.8665	1	UBE2J2	1253909	1273864	ubiquitin conjugatin...	no	no	no	no
ENSG00000230415	513	32	32	0	0	100	1	LINC01786	1275223	1280420	long intergenic non-...	no	no	no	no
ENSG00000162572	4025	348	348	0	0	100	1	SCNN1D	1280436	1292029	sodium channel epith...	no	no	no	no
ENSG00000131584	8707	1722	1736	14	0	99.1935	1	ACAP3	1292390	1309609	ArfGAP with coiled-c...	no	no	no	no
ENSG00000169972	2459	736	740	4	0	99.4595	1	PUSL1	1308597	1311677	pseudouridine syntha...	no	no	no	no
ENSG00000127054	8216	5266	5303	37	0	99.3023	1	INTS11	1311585	1324687	integrator complex s...	no	no	no	no
ENSG00000240731	386	226	230	4	1	98.2609	1		1317581	1318689	novel transcript	no	no	no	no
ENSG00000224051	2555	378	378	0	0	100	1	CPTP	1324756	1328896	ceramide-1-phosphate...	no	no	no	no
ENSG00000169962	3475	16	16	0	0	100	1	TAS1R3	1331280	1335314	taste 1 receptor mem...	no	no	no	no
ENSG00000107404	3882	3857	3865	8	0	99.793	1	DVL1	1335276	1349418	dishevelled segment ...	no	no	no	no
ENSG00000162576	3622	419	419	0	0	100	1	MXRA8	1352689	1361777	matrix remodeling as...	no	no	no	no
ENSG00000175756	1669	3900	3900	0	0	100	1	AURKAIP1	1373730	1375207	aurora kinase A inte...	no	no	no	no
ENSG00000223663	367	5	5	0	0	100	1	NDUFB4P8	1378666	1379032	NADH:ubiquinone oxid...	no	no	no	no
ENSG00000221978	6857	6204	6226	22	0	99.6466	1	CCNL2	1385711	1399335	cyclin L2 [Source:HG...	no	no	no	no
ENSG00000224870	2527	576	576	0	0	100	1	MRPL20-AS1	1399515	1402046	MRPL20 antisense RNA...	no	no	no	no
ENSG00000242485	2767	2229	2229	0	0	100	1	MRPL20	1401909	1407293	mitochondrial riboso...	no	no	no	no
ENSG00000272455	1523	408	408	0	0	100	1	MRPL20-DT	1409096	1410618	MRPL20 divergent tra...	no	no	no	no
ENSG00000235098	2644	97	97	0	0	100	1	ANKRD65	1418420	1421769	ankyrin repeat domai...	no	no	no	no
ENSG00000225905	543	10	10	0	0	100	1	ANKRD65-AS1	1420245	1422691	ANKRD65 antisense RN...	no	no	no	no
ENSG00000205116	492	53	53	0	0	100	1	TMEM88B	1425871	1430255	transmembrane protei...	no	no	no	no
ENSG00000225285	851	119	119	0	0	100	1	LINC01770	1430539	1434573	long intergenic non-...	no	no	no	no
ENSG00000179403	5065	1505	1511	6	0	99.6029	1	VWA1	1434861	1442882	von Willebrand facto...	no	no	no	no
ENSG00000215915	3981	55	149	94	63	36.9128	1	ATAD3C	1449689	1470163	ATPase family AAA do...	no	no	no	no
ENSG00000160072	7686	2646	3177	531	16	83.2861	1	ATAD3B	1471765	1497848	ATPase family AAA do...	no	no	no	no
ENSG00000284740	660	2	9	7	77	22.2222	1		1503582	1509351	ATPase family, AAA d...	no	no	no	no
ENSG00000197785	3344	2428	3233	805	24	75.1005	1	ATAD3A	1512162	1534685	ATPase family AAA do...	no	no	no	no
ENSG00000205090	2009	222	222	0	0	100	1	TMEM240	1534778	1540624	transmembrane protei...	no	no	no	no
ENSG00000160075	6919	5483	5487	4	0	99.9271	1	SSU72	1541673	1574863	SSU72 homolog, RNA p...	no	no	no	no
ENSG00000215014	2349	53	53	0	0	100	1		1574102	1577075	novel transcript	no	no	no	no
ENSG00000228594	2124	754	754	0	0	100	1	FNDC10	1598012	1600135	fibronectin type III...	no	no	no	no
ENSG00000286989	1830	63	63	0	0	100	1		1600314	1602703	novel transcript	no	no	no	no
ENSG00000272106	2038	251	267	16	5	94.0075	1		1613758	1615795	artifact	no	no	no	no
ENSG00000197530	8767	2232	2240	8	0	99.6429	1	MIB2	1615454	1630605	MIB E3 ubiquitin pro...	no	no	no	no
ENSG00000189409	2205	174	870	696	80	20	1	MMP23B	1632163	1635263	matrix metallopeptid...	no	no	no	no
ENSG00000248333	3488	3248	5725	2477	43	56.7336	1	CDK11B	1635225	1659012	cyclin dependent kin...	no	no	no	no
ENSG00000189339	8462	2704	3833	1129	29	70.5453	1	SLC35E2B	1659529	1692795	solute carrier famil...	no	no	no	no
ENSG00000269737	1819	81	87	6	6	93.1034	1		1671990	1674397	ribosomal protein S7...	no	no	no	no
ENSG00000215914	1017	8	628	620	98	1.27389	1	MMP23A	1699942	1701782	matrix metallopeptid...	no	no	no	no
ENSG00000008128	5085	125	198	73	36	63.1313	1	CDK11A	1702379	1724357	cyclin dependent kin...	no	no	no	no
ENSG00000268575	5079	181	181	0	0	100	1		1702736	1737688	novel transcript, re...	no	no	no	no
ENSG00000227775	2759	41	41	0	0	100	1		1724512	1737251	ribosomal protein S7...	no	no	no	no
ENSG00000215790	7713	1606	2712	1106	40	59.2183	1	SLC35E2A	1734690	1739557	solute carrier famil...	no	no	no	no
ENSG00000008130	5570	3822	4297	475	11	88.9458	1	NADK	1751232	1780457	NAD kinase [Source:H...	no	no	no	no
ENSG00000078369	6417	18685	18797	112	0	99.4042	1	GNB1	1785285	1892292	G protein subunit be...	no	no	no	no
ENSG00000169885	2040	40	40	0	0	100	1	CALML6	1915108	1917296	calmodulin like 6 [S...	no	no	no	no
ENSG00000178821	1600	400	404	4	0	99.0099	1	TMEM52	1917590	1919279	transmembrane protei...	no	no	no	no
ENSG00000142609	10422	27	27	0	0	100	1	CFAP74	1921951	2003837	cilia and flagella a...	no	no	no	no
ENSG00000233542	2063	11	11	0	0	100	1		2013213	2015639	novel transcript	no	no	no	no
ENSG00000187730	5525	80	80	0	0	100	1	GABRD	2019329	2030758	gamma-aminobutyric a...	no	no	no	no
ENSG00000226969	538	8	8	0	0	100	1	PRKCZ-DT	2049203	2050070	PRKCZ divergent tran...	no	no	no	no
ENSG00000067606	7695	1026	1030	4	0	99.6117	1	PRKCZ	2050411	2185395	protein kinase C zet...	no	no	no	no
ENSG00000271806	4196	2	2	0	0	100	1		2141084	2145279	novel transcript, an...	no	no	no	no
ENSG00000182873	1734	124	124	0	0	100	1	PRKCZ-AS1	2181794	2184389	PRKCZ antisense RNA ...	no	no	no	no
ENSG00000162585	10916	2404	2410	6	0	99.751	1	FAAP20	2184461	2212720	FA core complex asso...	no	no	no	no
ENSG00000157933	6550	6249	6315	66	1	98.9549	1	SKI	2227388	2310213	SKI proto-oncogene [...	no	no	no	no
ENSG00000287356	5794	228	228	0	0	100	1		2315040	2323085	novel transcript, an...	no	no	no	no
ENSG00000116151	11337	220	224	4	1	98.2143	1	MORN1	2321253	2391707	MORN repeat containi...	no	no	no	no
ENSG00000269896	2407	28	28	0	0	100	1		2350414	2352820	small nuclear ribonu...	no	no	no	no
ENSG00000272420	568	4	4	0	0	100	1		2363061	2363628	novel transcript, se...	no	no	no	no
ENSG00000157916	5689	2250	2282	32	1	98.5977	1	RER1	2391775	2405442	retention in endopla...	no	no	no	no
ENSG00000157911	3782	835	839	4	0	99.5232	1	PEX10	2403964	2413797	peroxisomal biogenes...	no	no	no	no
ENSG00000149527	10809	36	36	0	0	100	1	PLCH2	2425980	2505532	phospholipase C eta ...	no	no	no	no
ENSG00000224387	455	2	2	0	0	100	1		2492300	2493258	novel transcript	no	no	no	no
ENSG00000157881	5072	1855	1859	4	0	99.7848	1	PANK4	2508537	2526597	pantothenate kinase ...	no	no	no	no
ENSG00000197921	1324	3	3	0	0	100	1	HES5	2528745	2530263	hes family bHLH tran...	no	no	no	no
ENSG00000272449	1531	54	54	0	0	100	1		2530064	2547471	novel transcript	no	no	no	no
ENSG00000238164	6137	6	6	0	0	100	1	TNFRSF14-AS1	2549920	2557031	TNFRSF14 antisense R...	no	no	no	no
ENSG00000157873	6219	27	27	0	0	100	1	TNFRSF14	2555639	2565382	TNF receptor superfa...	no	no	no	no
ENSG00000225931	1297	1	1	0	0	100	1		2566410	2569888	novel transcript	no	no	no	no
ENSG00000228037	626	2	2	0	0	100	1		2581560	2584533	novel transcript	no	no	no	no
ENSG00000157870	3371	1550	1550	0	0	100	1	PRXL2B	2586491	2591469	peroxiredoxin like 2...	no	no	no	no
ENSG00000142606	3870	47	47	0	0	100	1	MMEL1	2590639	2633016	membrane metalloendo...	no	no	no	no
ENSG00000215912	8814	75	75	0	0	100	1	TTC34	2636986	2801693	tetratricopeptide re...	no	no	no	no
ENSG00000142611	9767	101	101	0	0	100	1	PRDM16	3069168	3438621	PR/SET domain 16 [So...	no	no	no	no
ENSG00000130762	5324	1118	1134	16	1	98.5891	1	ARHGEF16	3454665	3481113	Rho guanine nucleoti...	no	no	no	no
ENSG00000272088	382	3	3	0	0	100	1		3487246	3487627	novel transcript	no	no	no	no
ENSG00000162591	9021	3101	3101	0	0	100	1	MEGF6	3487951	3611508	multiple EGF like do...	no	no	no	no
ENSG00000238260	622	18	18	0	0	100	1		3622857	3624786	novel transcript	no	no	no	no
ENSG00000158109	2401	1066	1066	0	0	100	1	TPRG1L	3625015	3630127	tumor protein p63 re...	no	no	no	no
ENSG00000116213	7634	2030	2086	56	2	97.3154	1	WRAP73	3630767	3652761	WD repeat containing...	no	no	no	no
ENSG00000078900	6767	380	384	4	1	98.9583	1	TP73	3652516	3736201	tumor protein p73 [S...	no	no	no	no
ENSG00000235131	351	1	1	0	0	100	1	TP73-AS2	3712200	3714298	TP73 antisense RNA 2...	no	no	no	no
ENSG00000227372	9701	4177	4433	256	5	94.2251	1	TP73-AS1	3735511	3747373	TP73 antisense RNA 1...	no	no	no	no
ENSG00000162592	4238	22	22	0	0	100	1	CCDC27	3746460	3771645	coiled-coil domain c...	no	no	no	no
ENSG00000235169	1087	53	57	4	7	92.9825	1	SMIM1	3772749	3775982	small integral membr...	no	no	no	no
ENSG00000130764	4509	3999	4011	12	0	99.7008	1	LRRC47	3778559	3796498	leucine rich repeat ...	no	no	no	no
ENSG00000266075	297	11	11	0	0	100	1	RN7SL574P	3782815	3783111	RNA, 7SL, cytoplasmi...	no	no	no	no
ENSG00000272153	531	49	51	2	3	96.0784	1		3785008	3785538	novel transcript, an...	no	no	no	no
ENSG00000116198	11885	1508	1524	16	1	98.9501	1	CEP104	3812086	3857396	centrosomal protein ...	no	no	no	no
ENSG00000169598	3870	333	333	0	0	100	1	DFFB	3857267	3885429	DNA fragmentation fa...	no	no	no	no
ENSG00000198912	4388	1559	1643	84	5	94.8874	1	C1orf174	3889125	3900293	chromosome 1 open re...	no	no	no	no
ENSG00000236423	4084	16	16	0	0	100	1	LINC01134	3900347	3917225	long intergenic non-...	no	no	no	no
ENSG00000284668	1835	2	2	0	0	100	1	LINC02780	3976133	4012704	long intergenic non-...	no	no	no	no
ENSG00000196581	12528	4	4	0	0	100	1	AJAP1	4654609	4792534	adherens junctions a...	no	no	no	no
ENSG00000236948	1095	4	4	0	0	100	1		5561709	5668295	novel transcript	no	no	no	no
ENSG00000131697	13167	922	930	8	0	99.1398	1	NPHP4	5862811	5992473	nephrocystin 4 [Sour...	no	no	no	no
ENSG00000069424	17329	837	915	78	8	91.4754	1	KCNAB2	5990927	6101193	potassium voltage-ga...	no	no	no	no
ENSG00000116254	10094	166	166	0	0	100	1	CHD5	6101787	6180321	chromodomain helicas...	no	no	no	no
ENSG00000116251	4665	6034	11185	5151	46	53.9473	1	RPL22	6185020	6209389	ribosomal protein L2...	no	no	no	no
ENSG00000226944	378	12	12	0	0	100	1	RNF207-AS1	6204840	6205780	RNF207 antisense RNA...	no	no	no	no
ENSG00000158286	6595	298	306	8	2	97.3856	1	RNF207	6205475	6221299	ring finger protein ...	no	no	no	no
ENSG00000116237	4910	6210	6222	12	0	99.8071	1	ICMT	6221193	6235972	isoprenylcysteine ca...	no	no	no	no
ENSG00000225077	2358	78	78	0	0	100	1	ICMT-DT	6234692	6239444	ICMT divergent trans...	no	no	no	no
ENSG00000173673	710	141	141	0	0	100	1	HES3	6244179	6245578	hes family bHLH tran...	no	no	no	no
ENSG00000158292	4198	504	512	8	1	98.4375	1	GPR153	6247353	6261098	G protein-coupled re...	no	no	no	no
ENSG00000097021	4124	4953	4969	16	0	99.678	1	ACOT7	6264269	6393767	acyl-CoA thioesteras...	no	no	no	no
ENSG00000069812	5407	4	4	0	0	100	1	HES2	6412418	6424670	hes family bHLH tran...	no	no	no	no
ENSG00000187017	6952	850	854	4	0	99.5316	1	ESPN	6424776	6461367	espin [Source:HGNC S...	no	no	no	no
ENSG00000215788	4263	409	409	0	0	100	1	TNFRSF25	6460786	6466175	TNF receptor superfa...	no	no	no	no
ENSG00000171680	6935	1952	1960	8	0	99.5918	1	PLEKHG5	6467122	6520074	pleckstrin homology ...	no	no	no	no
ENSG00000162408	7271	1023	1023	0	0	100	1	NOL9	6521347	6554513	nucleolar protein 9 ...	no	no	no	no
ENSG00000229519	401	11	11	0	0	100	1		6547905	6548619	ribosomal protein L3...	no	no	no	no
ENSG00000173662	2764	14	14	0	0	100	1	TAS1R1	6555307	6579755	taste 1 receptor mem...	no	no	no	no
ENSG00000204859	4510	735	739	4	0	99.4587	1	ZBTB48	6579994	6589280	zinc finger and BTB ...	no	no	no	no
ENSG00000162413	6901	1521	1537	16	1	98.959	1	KLHL21	6590724	6614607	kelch like family me...	no	no	no	no
ENSG00000116273	3632	2303	2311	8	0	99.6538	1	PHF13	6613731	6624030	PHD finger protein 1...	no	no	no	no
ENSG00000041988	4072	607	607	0	0	100	1	THAP3	6624868	6635586	THAP domain containi...	no	no	no	no
ENSG00000007923	5083	3366	3379	13	0	99.6153	1	DNAJC11	6634168	6701924	DnaJ heat shock prot...	no	no	no	no
ENSG00000237436	415	67	67	0	0	100	1	CAMTA1-DT	6783892	6784843	CAMTA1 divergent tra...	no	no	no	no
ENSG00000171735	9903	2124	2170	46	2	97.8802	1	CAMTA1	6785454	7769706	calmodulin binding t...	no	no	no	no
ENSG00000237402	365	4	4	0	0	100	1	CAMTA1-IT1	7368942	7370270	CAMTA1 intronic tran...	no	no	no	no
ENSG00000270171	1721	73	73	0	0	100	1		7693124	7694844	novel transcript	no	no	no	no
ENSG00000270035	570	6	6	0	0	100	1		7698303	7698872	novel transcript	no	no	no	no
ENSG00000269978	267	14	14	0	0	100	1		7700704	7700970	novel transcript	no	no	no	no
ENSG00000049245	2733	2292	2292	0	0	100	1	VAMP3	7771296	7781432	vesicle associated m...	no	no	no	no
ENSG00000269925	393	32	32	0	0	100	1		7776383	7776775	novel transcript, se...	no	no	no	no
ENSG00000049246	8099	716	716	0	0	100	1	PER3	7784291	7845177	period circadian reg...	no	no	no	no
ENSG00000236266	830	6	6	0	0	100	1		7810242	7827342	novel transcript	no	no	no	no
ENSG00000049247	1793	10	10	0	0	100	1	UTS2	7843083	7853512	urotensin 2 [Source:...	no	no	no	no
ENSG00000116288	2397	7784	7792	8	0	99.8973	1	PARK7	7954291	7985505	Parkinsonism associa...	no	no	no	no
ENSG00000200344	103	4	4	0	0	100	1		7982881	7982983	Y RNA [Source:RFAM;A...	no	no	no	no
ENSG00000284747	4116	10	10	0	0	100	1		7991134	8005312	novel transcript, an...	no	no	no	no
ENSG00000284716	1043	3	3	0	0	100	1		7998187	7999934	novel transcript	no	no	no	no
ENSG00000116285	4179	3486	3502	16	0	99.5431	1	ERRFI1	8004404	8026309	ERBB receptor feedba...	no	no	no	no
ENSG00000238290	2044	2	2	0	0	100	1	ERRFI1-DT	8026738	8122702	ERRFI1 divergent tra...	no	no	no	no
ENSG00000227634	1001	1	1	0	0	100	1	LINC01714	8201518	8215210	long intergenic non-...	no	no	no	no
ENSG00000162426	2888	177	177	0	0	100	1	SLC45A1	8318114	8344167	solute carrier famil...	no	no	no	no
ENSG00000142599	14112	9380	9416	36	0	99.6177	1	RERE	8352397	8848921	arginine-glutamic ac...	no	no	no	no
ENSG00000232912	1178	4	4	0	0	100	1	RERE-AS1	8424645	8435013	RERE antisense RNA 1...	no	no	no	no
ENSG00000224315	703	4	4	0	0	100	1	RPL7P7	8786211	8786913	ribosomal protein L7...	no	no	no	no
ENSG00000074800	5216	118873	118953	80	0	99.9327	1	ENO1	8861000	8879190	enolase 1 [Source:HG...	no	no	no	no
ENSG00000230679	456	4	4	0	0	100	1	ENO1-AS1	8878835	8879894	ENO1 antisense RNA 1...	no	no	no	no
ENSG00000197241	1539	8	8	0	0	100	1	SLC2A7	9002973	9026423	solute carrier famil...	no	no	no	no
ENSG00000142583	6632	13	13	0	0	100	1	SLC2A5	9035106	9088478	solute carrier famil...	no	no	no	no
ENSG00000180758	5304	259	275	16	5	94.1818	1	GPR157	9100305	9129102	G protein-coupled re...	no	no	no	no
ENSG00000228526	8702	2027	2035	8	0	99.6069	1	MIR34AHG	9148011	9198906	MIR34A host gene [So...	no	no	no	no
ENSG00000234546	2141	215	215	0	0	100	1	LNCTAM34A	9182004	9196284	long non coding tran...	no	no	no	no
ENSG00000049239	9322	1835	1839	4	0	99.7825	1	H6PD	9234774	9271337	hexose-6-phosphate d...	no	no	no	no
ENSG00000171621	3389	232	232	0	0	100	1	SPSB1	9292894	9369532	splA/ryanodine recep...	no	no	no	no
ENSG00000284652	1765	2	2	0	0	100	1		9421098	9422862	novel transcript	no	no	no	no
ENSG00000284693	2623	3	3	0	0	100	1	LINC02606	9425094	9440564	long intergenic non-...	no	no	no	no
ENSG00000171612	3865	1314	1342	28	2	97.9136	1	SLC25A33	9539465	9585173	solute carrier famil...	no	no	no	no
ENSG00000231181	559	28	28	0	0	100	1		9576427	9576985	ribosomal protein L9...	no	no	no	no
ENSG00000188807	6981	1506	1514	8	0	99.4716	1	TMEM201	9588911	9614877	transmembrane protei...	no	no	no	no
ENSG00000171608	6333	1738	1758	20	1	98.8623	1	PIK3CD	9629889	9729114	phosphatidylinositol...	no	no	no	no
ENSG00000231789	939	256	256	0	0	100	1	PIK3CD-AS2	9672405	9687583	PIK3CD antisense RNA...	no	no	no	no
ENSG00000171603	5241	9278	9298	20	0	99.7849	1	CLSTN1	9728926	9823984	calsyntenin 1 [Sourc...	no	no	no	no
ENSG00000280113	1983	2	2	0	0	100	1		9826289	9828271	TEC	no	no	no	no
ENSG00000178585	3339	1982	1986	4	0	99.7986	1	CTNNBIP1	9848276	9910336	catenin beta interac...	no	no	no	no
ENSG00000285701	762	8	8	0	0	100	1		9900614	9908034	novel transcript, an...	no	no	no	no
ENSG00000162441	5459	1284	1296	12	0	99.0741	1	LZIC	9922113	9943407	leucine zipper and C...	no	no	no	no
ENSG00000228150	440	3	3	0	0	100	1		9942923	9949974	novel transcript	no	no	no	no
ENSG00000173614	4610	185	185	0	0	100	1	NMNAT1	9943428	9985501	nicotinamide nucleot...	no	no	no	no
ENSG00000202415	319	4	4	0	0	100	1	RN7SKP269	9947318	9947636	RN7SK pseudogene 269...	no	no	no	no
ENSG00000283611	444	4	4	0	0	100	1	TMEM274P	9950572	9960787	transmembrane protei...	no	no	no	no
ENSG00000162444	862	33	33	0	0	100	1	RBP7	9997206	10016021	retinol binding prot...	no	no	no	no
ENSG00000130939	9237	7090	7136	46	0	99.3554	1	UBE4B	10032832	10181239	ubiquitination facto...	no	no	no	no
ENSG00000233623	680	2	2	0	0	100	1	PGAM1P11	10058671	10059648	phosphoglycerate mut...	no	no	no	no
ENSG00000201746	107	7	7	0	0	100	1	RNU6-828P	10163268	10163374	RNA, U6 small nuclea...	no	no	no	no
ENSG00000054523	17955	10367	10399	32	0	99.6923	1	KIF1B	10210570	10381603	kinesin family membe...	no	no	no	no
ENSG00000264881	86	1	1	0	0	100	1		10227718	10227803		no	no	no	no
ENSG00000199562	107	2	2	0	0	100	1	RNU6-37P	10298966	10299072	RNA, U6 small nuclea...	no	no	no	no
ENSG00000284735	2381	37	39	2	5	94.8718	1		10381906	10387150	novel transcript	no	no	no	no
ENSG00000284642	1477	48	52	4	7	92.3077	1		10395416	10397432	novel transcript	no	no	no	no
ENSG00000142657	3333	15634	15686	52	0	99.6685	1	PGD	10398592	10420511	phosphogluconate deh...	no	no	no	no
ENSG00000251503	2244	3	5	2	40	60	1	CENPS-CORT	10430102	10452153	CENPS-CORT readthrou...	no	no	no	no
ENSG00000175279	1748	35	35	0	0	100	1	CENPS	10430433	10442808	centromere protein S...	no	no	no	no
ENSG00000241563	914	6	6	0	0	100	1	CORT	10450031	10451998	cortistatin [Source:...	no	no	no	no
ENSG00000160049	6625	5162	5227	65	1	98.7565	1	DFFA	10456522	10472529	DNA fragmentation fa...	no	no	no	no
ENSG00000142655	2932	1430	1438	8	0	99.4437	1	PEX14	10472288	10630758	peroxisomal biogenes...	no	no	no	no
ENSG00000287727	2876	2	2	0	0	100	1		10612222	10616452	novel transcript, an...	no	no	no	no
ENSG00000243267	280	1	1	0	0	100	1	RN7SL614P	10616836	10617115	RNA, 7SL, cytoplasmi...	no	no	no	no
ENSG00000130940	11336	238	238	0	0	100	1	CASZ1	10636604	10796650	castor zinc finger 1...	no	no	no	no
ENSG00000272078	7923	45	45	0	0	100	1		10639241	10654333	novel transcript, an...	no	no	no	no
ENSG00000175262	3573	12	12	0	0	100	1	C1orf127	10946471	10982076	chromosome 1 open re...	no	no	no	no
ENSG00000120948	5317	8442	8458	16	0	99.8108	1	TARDBP	11012344	11030528	TAR DNA binding prot...	no	no	no	no
ENSG00000009724	4257	171	171	0	0	100	1	MASP2	11022009	11047239	MBL associated serin...	no	no	no	no
ENSG00000271895	870	47	47	0	0	100	1	AL109811.2	11029659	11030528	lncRNA	no	no	no	no
ENSG00000116649	1894	5384	5406	22	0	99.593	1	SRM	11054584	11060020	spermidine synthase ...	no	no	no	no
ENSG00000171824	5991	3387	3387	0	0	100	1	EXOSC10	11066618	11099869	exosome component 10...	no	no	no	no
ENSG00000226849	2682	8	8	0	0	100	1		11068471	11073097	novel transcript	no	no	no	no
ENSG00000230337	536	3	3	0	0	100	1	EXOSC10-AS1	11099430	11102105	EXOSC10 antisense RN...	no	no	no	no
ENSG00000198793	12163	5966	5974	8	0	99.8661	1	MTOR	11106535	11262556	mechanistic target o...	no	no	no	no
ENSG00000225602	763	1	1	0	0	100	1	MTOR-AS1	11143898	11149537	MTOR antisense RNA 1...	no	no	no	no
ENSG00000171819	2224	4	4	0	0	100	1	ANGPTL7	11189355	11195981	angiopoietin like 7 ...	no	no	no	no
ENSG00000238173	150	1	1	0	0	100	1	RPL39P6	11232963	11233112	ribosomal protein L3...	no	no	no	no
ENSG00000120942	5090	891	903	12	1	98.6711	1	UBIAD1	11273198	11296049	UbiA prenyltransfera...	no	no	no	no
ENSG00000204624	6120	340	340	0	0	100	1	DISP3	11479155	11537551	dispatched RND trans...	no	no	no	no
ENSG00000285833	1051	2	2	0	0	100	1		11500803	11502016	novel transcript, an...	no	no	no	no
ENSG00000235643	1351	3	3	0	0	100	1	LINC01647	11609468	11613358	long intergenic non-...	no	no	no	no
ENSG00000284708	2094	18	18	0	0	100	1		11623558	11643416	novel transcript	no	no	no	no
ENSG00000116661	3163	1509	1529	20	1	98.692	1	FBXO2	11637018	11655785	F-box protein 2 [Sou...	no	no	no	no
ENSG00000132879	3527	1959	1979	20	1	98.9894	1	FBXO44	11654375	11663327	F-box protein 44 [So...	no	no	no	no
ENSG00000116663	1735	51	51	0	0	100	1	FBXO6	11664200	11674354	F-box protein 6 [Sou...	no	no	no	no
ENSG00000116670	3324	6532	6616	84	1	98.7304	1	MAD2L2	11658918	11691811	mitotic arrest defic...	no	no	no	no
ENSG00000162490	7365	1260	1276	16	1	98.7461	1	DRAXIN	11691710	11725857	dorsal inhibitory ax...	no	no	no	no
ENSG00000177674	2435	2276	2284	8	0	99.6497	1	AGTRAP	11736084	11754802	angiotensin II recep...	no	no	no	no
ENSG00000215910	6499	33	33	0	0	100	1	C1orf167	11761787	11789585	chromosome 1 open re...	no	no	no	no
ENSG00000177000	11513	932	986	54	5	94.5233	1	MTHFR	11785723	11806455	methylenetetrahydrof...	no	no	no	no
ENSG00000011021	8173	2925	2967	42	1	98.5844	1	CLCN6	11806096	11848079	chloride voltage-gat...	no	no	no	no
ENSG00000175206	1120	4	4	0	0	100	1	NPPA	11845709	11848345	natriuretic peptide ...	no	no	no	no
ENSG00000120937	708	52	52	0	0	100	1	NPPB	11857464	11858945	natriuretic peptide ...	no	no	no	no
ENSG00000285646	3071	19	19	0	0	100	1		11907940	11914298	novel transcript	no	no	no	no
ENSG00000116685	3281	2724	2744	20	0	99.2711	1	KIAA2013	11919591	11926428	KIAA2013 [Source:HGN...	no	no	no	no
ENSG00000083444	5320	4242	4260	18	0	99.5775	1	PLOD1	11934205	11975538	procollagen-lysine,2...	no	no	no	no
ENSG00000116688	10234	3974	3994	20	0	99.4992	1	MFN2	11980181	12015211	mitofusin 2 [Source:...	no	no	no	no
ENSG00000116691	2821	1724	1728	4	0	99.7685	1	MIIP	12019466	12032045	migration and invasi...	no	no	no	no
ENSG00000202461	113	4	4	0	0	100	1		12024012	12024124	Y RNA [Source:RFAM;A...	no	no	no	no
ENSG00000120949	3812	786	786	0	0	100	1	TNFRSF8	12063303	12144207	TNF receptor superfa...	no	no	no	no
ENSG00000285604	1196	2	2	0	0	100	1		12088441	12092264	novel transcript, an...	no	no	no	no
ENSG00000028137	3778	159	163	4	2	97.546	1	TNFRSF1B	12166991	12209228	TNF receptor superfa...	no	no	no	no
ENSG00000048707	20768	3513	3521	8	0	99.7728	1	VPS13D	12230030	12512047	vacuolar protein sor...	no	no	no	no
ENSG00000239149	152	27	35	8	22	77.1429	1	SNORA59A	12507246	12507397	small nucleolar RNA,...	no	no	no	no
ENSG00000162496	3515	286	286	0	0	100	1	DHRS3	12567910	12618210	dehydrogenase/reduct...	no	no	no	no
ENSG00000221340	101	2	2	0	0	100	1	RNU6ATAC18P	12569972	12570072	RNA, U6atac small nu...	no	no	no	no
ENSG00000276830	67	1	1	0	0	100	1	MIR6730	12578957	12579023	microRNA 6730 [Sourc...	no	no	no	no
ENSG00000272482	345	7	7	0	0	100	1		12618900	12619980	novel transcript	no	no	no	no
ENSG00000204518	1575	2	2	0	0	100	1	AADACL4	12644085	12667076	arylacetamide deacet...	no	no	no	no
ENSG00000188984	4055	6	6	0	0	100	1	AADACL3	12716110	12728760	arylacetamide deacet...	no	no	no	no
ENSG00000162494	2168	14	14	0	0	100	1	LRRC38	13474973	13514003	leucine rich repeat ...	no	no	no	no
ENSG00000162493	3707	3269	3305	36	1	98.9107	1	PDPN	13583465	13617957	podoplanin [Source:H...	no	no	no	no
ENSG00000237445	379	18	18	0	0	100	1		13657311	13659910	novel transcript	no	no	no	no
ENSG00000116731	10923	1861	1885	24	1	98.7268	1	PRDM2	13700188	13825079	PR/SET domain 2 [Sou...	no	no	no	no
ENSG00000189337	13860	901	915	14	1	98.4699	1	KAZN	13892792	15118043	kazrin, periplakin i...	no	no	no	no
ENSG00000235829	326	4	4	0	0	100	1	TBCAP2	14692129	14692613	tubulin folding cofa...	no	no	no	no
ENSG00000175147	11973	45	45	0	0	100	1	TMEM51-AS1	15111815	15153618	TMEM51 antisense RNA...	no	no	no	no
ENSG00000171729	2238	428	432	4	0	99.0741	1	TMEM51	15152532	15220478	transmembrane protei...	no	no	no	no
ENSG00000204464	559	2	2	0	0	100	1	TMEM51-AS2	15164344	15171317	TMEM51 antisense RNA...	no	no	no	no
ENSG00000278480	966	2	2	0	0	100	1	ZBTB2P1	15226373	15227549	ZBTB2 pseudogene 1 [...	no	no	no	no
ENSG00000142621	12805	52	52	0	0	100	1	FHAD1	15236521	15400283	forkhead associated ...	no	no	no	no
ENSG00000228140	5178	16	16	0	0	100	1	EFHD2-AS1	15402979	15409433	EFHD2 antisense RNA ...	no	no	no	no
ENSG00000142634	2534	1307	1311	4	0	99.6949	1	EFHD2	15409888	15430339	EF-hand domain famil...	no	no	no	no
ENSG00000162438	3483	8	8	0	0	100	1	CTRC	15438442	15449242	chymotrypsin C [Sour...	no	no	no	no
ENSG00000142615	1519	12	12	0	0	100	1	CELA2A	15456728	15472091	chymotrypsin like el...	no	no	no	no
ENSG00000215704	1449	14	14	0	0	100	1	CELA2B	15465909	15491395	chymotrypsin like el...	no	no	no	no
ENSG00000132906	5269	550	552	2	0	99.6377	1	CASP9	15490832	15526534	caspase 9 [Source:HG...	no	no	no	no
ENSG00000116138	8563	954	964	10	1	98.9627	1	DNAJC16	15526813	15592379	DnaJ heat shock prot...	no	no	no	no
ENSG00000116771	3095	210	210	0	0	100	1	AGMAT	15571699	15585051	agmatinase [Source:H...	no	no	no	no
ENSG00000237301	2845	34	34	0	0	100	1		15586136	15603626	novel transcript	no	no	no	no
ENSG00000235084	447	3	3	0	0	100	1	CHCHD2P6	15604597	15605043	coiled-coil-helix-co...	no	no	no	no
ENSG00000197312	12178	3997	4025	28	0	99.3043	1	DDI2	15617458	15669044	DNA damage inducible...	no	no	no	no
ENSG00000116786	4134	3046	3058	12	0	99.6076	1	PLEKHM2	15684320	15734769	pleckstrin homology ...	no	no	no	no
ENSG00000237938	1533	57	57	0	0	100	1		15720312	15736896	novel transcript, an...	no	no	no	no
ENSG00000162461	3338	44	44	0	0	100	1	SLC25A34	15736258	15741392	solute carrier famil...	no	no	no	no
ENSG00000224459	639	6	6	0	0	100	1	SLC25A34-AS1	15740048	15749896	SLC25A34 and TMEM82 ...	no	no	no	no
ENSG00000162460	1443	41	45	4	8	91.1111	1	TMEM82	15742499	15747982	transmembrane protei...	no	no	no	no
ENSG00000162458	4351	4395	4443	48	1	98.9196	1	FBLIM1	15756607	15786594	filamin binding LIM ...	no	no	no	no
ENSG00000233954	2180	92	94	2	2	97.8723	1	UQCRHL	15807169	15809348	ubiquinol-cytochrome...	no	no	no	no
ENSG00000179743	2473	212	212	0	0	100	1	SPEN-AS1	15834474	15848147	SPEN antisense RNA 1...	no	no	no	no
ENSG00000065526	14336	4842	4846	4	0	99.9175	1	SPEN	15836095	15940456	spen family transcri...	no	no	no	no
ENSG00000116809	4240	1046	1046	0	0	100	1	ZBTB17	15941869	15976132	zinc finger and BTB ...	no	no	no	no
ENSG00000173641	3910	13	13	0	0	100	1	HSPB7	16014028	16019594	heat shock protein f...	no	no	no	no
ENSG00000186510	3476	100	100	0	0	100	1	CLCNKA	16018875	16034050	chloride voltage-gat...	no	no	no	no
ENSG00000232456	704	2	2	0	0	100	1	FAM131C2P	16035178	16040029	family with sequence...	no	no	no	no
ENSG00000184908	2939	190	190	0	0	100	1	CLCNKB	16040252	16057311	chloride voltage-gat...	no	no	no	no
ENSG00000185519	1720	103	136	33	24	75.7353	1	FAM131C	16057769	16073651	family with sequence...	no	no	no	no
ENSG00000142627	4141	3031	3039	8	0	99.7368	1	EPHA2	16124337	16156069	EPH receptor A2 [Sou...	no	no	no	no
ENSG00000227959	904	10	10	0	0	100	1	EPHA2-AS1	16155176	16158148	EPHA2 antisense RNA ...	no	no	no	no
ENSG00000224621	544	6	6	0	0	100	1		16159266	16161883	novel transcript	no	no	no	no
ENSG00000142632	3788	3883	3885	2	0	99.9485	1	ARHGEF19	16197854	16212652	Rho guanine nucleoti...	no	no	no	no
ENSG00000237276	1990	3	3	0	0	100	1	ANO7L1	16216469	16228027	anoctamin 7 like 1 (...	no	no	no	no
ENSG00000288398	2662	57	57	0	0	100	1		16228674	16231335	novel transcript	no	no	no	no
ENSG00000132881	1574	70	70	0	0	100	1	CPLANE2	16231692	16237183	ciliogenesis and pla...	no	no	no	no
ENSG00000233929	186	3	3	0	0	100	1	MT1XP1	16241213	16241398	metallothionein 1X p...	no	no	no	no
ENSG00000037637	9009	1385	1391	6	0	99.5687	1	FBXO42	16246840	16352480	F-box protein 42 [So...	no	no	no	no
ENSG00000055070	4742	4002	4032	30	0	99.256	1	SZRD1	16352575	16398145	SUZ RNA binding doma...	no	no	no	no
ENSG00000187144	4506	15	15	0	0	100	1	SPATA21	16387117	16437424	spermatogenesis asso...	no	no	no	no
ENSG00000157191	5510	1250	1264	14	1	98.8924	1	NECAP2	16440721	16460078	NECAP endocytosis as...	no	no	no	no
ENSG00000226029	3245	102	106	4	3	96.2264	1	LINC01772	16460948	16468481	long intergenic non-...	no	no	no	no
ENSG00000080947	6905	666	682	16	2	97.654	1	CROCCP3	16474396	16491307	CROCC pseudogene 3 [...	no	no	no	no
ENSG00000261135	1110	7	8	1	12	87.5	1		16514645	16515754	novel transcript	no	no	no	no
ENSG00000233421	2068	11	23	12	52	47.8261	1	LINC01783	16533886	16535649	long intergenic non-...	no	no	no	no
ENSG00000219481	12212	780	1757	977	55	44.3939	1	NBPF1	16562319	16613562	NBPF member 1 [Sourc...	no	no	no	no
ENSG00000271732	339	6	6	0	0	100	1		16617391	16617729	novel transcript	no	no	no	no
ENSG00000215908	5606	2205	2254	49	2	97.8261	1	CROCCP2	16618969	16657232	CROCC pseudogene 2 [...	no	no	no	no
ENSG00000186301	2291	229	303	74	24	75.5776	1	MST1P2	16645622	16650289	macrophage stimulati...	no	no	no	no
ENSG00000282143	817	1	28	27	96	3.57143	1		16656879	16667524	novel transcript	no	no	no	no
ENSG00000280114	1351	14	74	60	81	18.9189	1		16681097	16688749	phosphodiesterase 4D...	no	no	no	no
ENSG00000236698	435	39	188	149	79	20.7447	1	EIF1AXP1	16685621	16686055	EIF1AX pseudogene 1 ...	no	no	no	no
ENSG00000268869	4903	63	122	59	48	51.6393	1	ESPNP	16692280	16720157	espin pseudogene [So...	no	no	no	no
ENSG00000282740	819	1	15	14	93	6.66667	1		16739938	16750589	novel transcript	no	no	no	no
ENSG00000058453	8875	6047	6267	220	3	96.4895	1	CROCC	16740273	16972964	ciliary rootlet coil...	no	no	no	no
ENSG00000227684	762	12	26	14	53	46.1538	1	CROCCP4	16750233	16750964	CROCC pseudogene 4 [...	no	no	no	no
ENSG00000186715	5298	568	746	178	23	76.1394	1	MST1L	16757232	16764480	macrophage stimulati...	no	no	no	no
ENSG00000228549	3293	56	74	18	24	75.6757	1		16870945	16883659	novel transcript	no	no	no	no
ENSG00000238142	2130	180	185	5	2	97.2973	1		16887577	16889725	novel transcript	no	no	no	no
ENSG00000207005	164	3	5	2	40	60	1	RNU1-2	16895980	16896143	RNA, U1 small nuclea...	no	no	no	no
ENSG00000272426	438	12	12	0	0	100	1		16904339	16904776	novel transcript	no	no	no	no
ENSG00000117122	2712	2220	2889	669	23	76.8432	1	MFAP2	16974502	16980632	microfibril associat...	no	no	no	no
ENSG00000226526	636	1	1	0	0	100	1		16978926	17005091	novel transcript	no	no	no	no
ENSG00000159363	5253	3183	3191	8	0	99.7493	1	ATP13A2	16985958	17011928	ATPase cation transp...	no	no	no	no
ENSG00000117118	2324	2155	2155	0	0	100	1	SDHB	17018722	17054032	succinate dehydrogen...	no	no	no	no
ENSG00000117115	6000	350	350	0	0	100	1	PADI2	17066761	17119451	peptidyl arginine de...	no	no	no	no
ENSG00000142623	4903	16	16	0	0	100	1	PADI1	17205128	17246007	peptidyl arginine de...	no	no	no	no
ENSG00000142619	3189	119	119	0	0	100	1	PADI3	17249098	17284233	peptidyl arginine de...	no	no	no	no
ENSG00000159339	2971	12	20	8	40	60	1	PADI4	17308195	17364004	peptidyl arginine de...	no	no	no	no
ENSG00000179051	4079	22516	22837	321	1	98.5944	1	RCC2	17406760	17439677	regulator of chromos...	no	no	no	no
ENSG00000074964	7954	1952	1956	4	0	99.7955	1	ARHGEF10L	17539698	17697874	Rho guanine nucleoti...	no	no	no	no
ENSG00000117148	1844	24	24	0	0	100	1	ACTL8	17755333	17827063	actin like 8 [Source...	no	no	no	no
ENSG00000117154	3033	1562	1562	0	0	100	1	IGSF21	18107798	18378483	immunoglobin superfa...	no	no	no	no
ENSG00000280222	6473	10	10	0	0	100	1		18109389	18115861	TEC	no	no	no	no
ENSG00000225387	491	7	7	0	0	100	1		18385829	18388514	novel transcript	no	no	no	no
ENSG00000179023	5145	1702	1702	0	0	100	1	KLHDC7A	18480930	18485974	kelch domain contain...	no	no	no	no
ENSG00000009709	6473	10	10	0	0	100	1	PAX7	18630846	18748866	paired box 7 [Source...	no	no	no	no
ENSG00000179002	2542	2	2	0	0	100	1	TAS1R2	18839599	18859660	taste 1 receptor mem...	no	no	no	no
ENSG00000159423	3632	1816	1824	8	0	99.5614	1	ALDH4A1	18871430	18902724	aldehyde dehydrogena...	no	no	no	no
ENSG00000169991	6179	1588	1608	20	1	98.7562	1	IFFO2	18904280	18956676	intermediate filamen...	no	no	no	no
ENSG00000272084	3402	39	39	0	0	100	1		19072110	19075511	novel transcript	no	no	no	no
ENSG00000127481	24661	23794	23874	80	0	99.6649	1	UBR4	19074510	19210266	ubiquitin protein li...	no	no	no	no
ENSG00000230424	507	19	19	0	0	100	1	EMC1-AS1	19210348	19240709	EMC1 antisense RNA 1...	no	no	no	no
ENSG00000127463	9602	3772	3836	64	1	98.3316	1	EMC1	19215660	19251552	ER membrane protein ...	no	no	no	no
ENSG00000053372	2556	2855	2894	39	1	98.6524	1	MRTO4	19251805	19260128	MRT4 homolog, riboso...	no	no	no	no
ENSG00000286064	339	5	5	0	0	100	1		19260521	19262307	aldo-keto reductase ...	no	no	no	no
ENSG00000211454	2768	22	25	3	12	88	1	AKR7L	19265982	19274194	aldo-keto reductase ...	no	no	no	no
ENSG00000162482	1215	39	51	12	23	76.4706	1	AKR7A3	19282573	19288770	aldo-keto reductase ...	no	no	no	no
ENSG00000270728	525	90	90	0	0	100	1		19297080	19297903	synaptonemal complex...	no	no	no	no
ENSG00000053371	1781	1424	1424	0	0	100	1	AKR7A2	19303965	19312144	aldo-keto reductase ...	no	no	no	no
ENSG00000200403	107	2	2	0	0	100	1	RNU6-1099P	19305076	19305182	RNA, U6 small nuclea...	no	no	no	no
ENSG00000040487	2686	526	534	8	1	98.5019	1	SLC66A1	19312326	19329300	solute carrier famil...	no	no	no	no
ENSG00000077549	19094	16945	17073	128	0	99.2503	1	CAPZB	19338775	19485539	capping actin protei...	no	no	no	no
ENSG00000173436	5480	129	129	0	0	100	1	MICOS10	19484403	19629821	mitochondrial contac...	no	no	no	no
ENSG00000158747	3448	187	187	0	0	100	1	NBL1	19596979	19658456	NBL1, DAN family BMP...	no	no	no	no
ENSG00000226396	455	12	12	0	0	100	1		19608114	19608568	ribosomal protein S1...	no	no	no	no
ENSG00000158748	3800	92	92	0	0	100	1	HTR6	19664875	19680966	5-hydroxytryptamine ...	no	no	no	no
ENSG00000162542	4054	285	285	0	0	100	1	TMCO4	19682240	19799945	transmembrane and co...	no	no	no	no
ENSG00000169914	6885	2721	2733	12	0	99.5609	1	OTUD3	19882395	19912945	OTU deubiquitinase 3...	no	no	no	no
ENSG00000188257	1685	10	10	0	0	100	1	PLA2G2A	19975431	19980416	phospholipase A2 gro...	no	no	no	no
ENSG00000127472	3342	1	1	0	0	100	1	PLA2G5	20028179	20091911	phospholipase A2 gro...	no	no	no	no
ENSG00000227066	2930	2	2	0	0	100	1		20154171	20160568	novel transcript	no	no	no	no
ENSG00000187980	3298	10	10	0	0	100	1	PLA2G2C	20161253	20186518	phospholipase A2 gro...	no	no	no	no
ENSG00000225986	510	5	5	0	0	100	1	UBXN10-AS1	20184242	20186486	lncRNA	no	no	no	no
ENSG00000162543	5562	27	27	0	0	100	1	UBXN10	20186096	20196050	UBX domain protein 1...	no	no	no	no
ENSG00000158816	6377	134	134	0	0	100	1	VWA5B1	20290875	20359518	von Willebrand facto...	no	no	no	no
ENSG00000226664	229	1	1	0	0	100	1		20294211	20323187	novel transcript	no	no	no	no
ENSG00000162545	2605	497	509	12	2	97.6424	1	CAMK2N1	20482391	20486210	calcium/calmodulin d...	no	no	no	no
ENSG00000090432	2428	898	898	0	0	100	1	MUL1	20499448	20508151	mitochondrial E3 ubi...	no	no	no	no
ENSG00000183114	2448	82	82	0	0	100	1	FAM43B	20552573	20555020	family with sequence...	no	no	no	no
ENSG00000158825	820	212	212	0	0	100	1	CDA	20589086	20618903	cytidine deaminase [...	no	no	no	no
ENSG00000158828	4833	307	311	4	1	98.7138	1	PINK1	20633458	20651511	PTEN induced kinase ...	no	no	no	no
ENSG00000117242	4443	60	62	2	3	96.7742	1	PINK1-AS	20642657	20652193	PINK1 antisense RNA ...	no	no	no	no
ENSG00000244038	2721	12124	12156	32	0	99.7368	1	DDOST	20651767	20661544	dolichyl-diphosphool...	no	no	no	no
ENSG00000117245	4470	721	721	0	0	100	1	KIF17	20664014	20718017	kinesin family membe...	no	no	no	no
ENSG00000235432	479	1	1	0	0	100	1		20692734	20694013	nucleolar protein 5A...	no	no	no	no
ENSG00000189410	4487	689	689	0	0	100	1	SH2D5	20719731	20732837	SH2 domain containin...	no	no	no	no
ENSG00000127483	9815	7573	7699	126	1	98.3634	1	HP1BP3	20740266	20787323	heterochromatin prot...	no	no	no	no
ENSG00000075151	9596	7709	7773	64	0	99.1766	1	EIF4G3	20806292	21177285	eukaryotic translati...	no	no	no	no
ENSG00000117298	7308	3618	3630	12	0	99.6694	1	ECE1	21217247	21345572	endothelin convertin...	no	no	no	no
ENSG00000231105	2579	31	31	0	0	100	1	ECE1-AS1	21293290	21299874	ECE1 antisense RNA 1...	no	no	no	no
ENSG00000227001	661	65	71	6	8	91.5493	1	NBPF2P	21424625	21427967	NBPF member 2, pseud...	no	no	no	no
ENSG00000187952	1234	5	229	224	97	2.18341	1	HS6ST1P1	21428303	21429536	heparan sulfate 6-O-...	no	no	no	no
ENSG00000186543	830	6	6	0	0	100	1	CROCCP5	21434318	21437558	CROCC pseudogene 5 [...	no	no	no	no
ENSG00000142794	6812	522	565	43	7	92.3894	1	NBPF3	21440128	21485005	NBPF member 3 [Sourc...	no	no	no	no
ENSG00000162551	2980	8436	8552	116	1	98.6436	1	ALPL	21509397	21578410	alkaline phosphatase...	no	no	no	no
ENSG00000233431	821	3	3	0	0	100	1	LINC02596	21586472	21591187	long intergenic non-...	no	no	no	no
ENSG00000076864	5755	940	944	4	0	99.5763	1	RAP1GAP	21596221	21669357	RAP1 GTPase activati...	no	no	no	no
ENSG00000090686	9497	6188	6192	4	0	99.9354	1	USP48	21678298	21783606	ubiquitin specific p...	no	no	no	no
ENSG00000187942	4494	23	23	0	0	100	1	LDLRAD2	21812265	21825225	low density lipoprot...	no	no	no	no
ENSG00000142798	18118	15835	15943	108	0	99.3226	1	HSPG2	21822244	21937310	heparan sulfate prot...	no	no	no	no
ENSG00000232037	483	2	2	0	0	100	1		21908098	21908580	ribosomal protein L2...	no	no	no	no
ENSG00000218510	3764	252	264	12	4	95.4545	1	LINC00339	22024558	22031223	long intergenic non-...	no	no	no	no
ENSG00000070831	16278	9360	9463	103	1	98.9116	1	CDC42	22052627	22101360	cell division cycle ...	no	no	no	no
ENSG00000285752	2574	38	38	0	0	100	1	CDC42-AS1	22028317	22052927	CDC42 antisense RNA ...	no	no	no	no
ENSG00000230068	692	2	2	0	0	100	1	CDC42-IT1	22059197	22064199	CDC42 intronic trans...	no	no	no	no
ENSG00000162552	4650	15	15	0	0	100	1	WNT4	22117313	22143969	Wnt family member 4 ...	no	no	no	no
ENSG00000279625	1853	4	4	0	0	100	1		22364630	22366482	TEC	no	no	no	no
ENSG00000184677	9169	1682	1682	0	0	100	1	ZBTB40	22428838	22531157	zinc finger and BTB ...	no	no	no	no
ENSG00000237200	273	22	22	0	0	100	1	ZBTB40-IT1	22517474	22519708	ZBTB40 intronic tran...	no	no	no	no
ENSG00000070886	5434	279	279	0	0	100	1	EPHA8	22563489	22603595	EPH receptor A8 [Sou...	no	no	no	no
ENSG00000133216	12516	815	815	0	0	100	1	EPHB2	22710839	22921500	EPH receptor B2 [Sou...	no	no	no	no
ENSG00000227868	660	12	12	0	0	100	1	TEX46	23010834	23019100	testis expressed 46 ...	no	no	no	no
ENSG00000004487	5440	16578	16604	26	0	99.8434	1	KDM1A	23019443	23083689	lysine demethylase 1...	no	no	no	no
ENSG00000240553	666	2	2	0	0	100	1		23020147	23088058	novel transcript	no	no	no	no
ENSG00000169641	9658	4342	4354	12	0	99.7244	1	LUZP1	23084030	23177808	leucine zipper prote...	no	no	no	no
ENSG00000229010	818	2	2	0	0	100	1		23140325	23141142	novel pseudogene	no	no	no	no
ENSG00000179546	2835	20	20	0	0	100	1	HTR1D	23191895	23217502	5-hydroxytryptamine ...	no	no	no	no
ENSG00000261326	6182	730	730	0	0	100	1	LINC01355	23281307	23287488	long intergenic non-...	no	no	no	no
ENSG00000284726	604	44	44	0	0	100	1		23297797	23302866	novel transcript	no	no	no	no
ENSG00000125944	8704	13065	13121	56	0	99.5732	1	HNRNPR	23303771	23344336	heterogeneous nuclea...	no	no	no	no
ENSG00000125945	4786	135	135	0	0	100	1	ZNF436	23359448	23369836	zinc finger protein ...	no	no	no	no
ENSG00000249087	2674	59	59	0	0	100	1	ZNF436-AS1	23368939	23371839	ZNF436 antisense RNA...	no	no	no	no
ENSG00000204219	3675	14	14	0	0	100	1	TCEA3	23380909	23424748	transcription elonga...	no	no	no	no
ENSG00000088280	4988	3900	3916	16	0	99.5914	1	ASAP3	23428563	23484568	ArfGAP with SH3 doma...	no	no	no	no
ENSG00000007968	5462	389	389	0	0	100	1	E2F2	23506438	23531233	E2F transcription fa...	no	no	no	no
ENSG00000235052	456	14	14	0	0	100	1		23549139	23550915	novel transcript	no	no	no	no
ENSG00000117318	1496	4002	4014	12	0	99.701	1	ID3	23557926	23559501	inhibitor of DNA bin...	no	no	no	no
ENSG00000285802	1322	1	1	0	0	100	1		23576436	23593621	novel transcript	no	no	no	no
ENSG00000142676	2659	39613	39665	52	0	99.8689	1	RPL11	23691742	23696835	ribosomal protein L1...	no	no	no	no
ENSG00000236810	3086	117	117	0	0	100	1	ELOA-AS1	23706901	23778325	ELOA antisense RNA 1...	no	no	no	no
ENSG00000011007	5391	2972	3000	28	0	99.0667	1	ELOA	23743448	23762059	elongin A [Source:HG...	no	no	no	no
ENSG00000057757	2173	2093	2097	4	0	99.8093	1	PITHD1	23778418	23788232	PITH domain containi...	no	no	no	no
ENSG00000011009	2021	5132	5150	18	0	99.6505	1	LYPLA2	23791145	23795539	lysophospholipase 2 ...	no	no	no	no
ENSG00000117308	3955	572	588	16	2	97.2789	1	GALE	23795599	23800781	UDP-galactose-4-epim...	no	no	no	no
ENSG00000117305	5628	1017	1025	8	0	99.2195	1	HMGCL	23801885	23838620	3-hydroxy-3-methylgl...	no	no	no	no
ENSG00000179163	2043	623	623	0	0	100	1	FUCA1	23845077	23868290	alpha-L-fucosidase 1...	no	no	no	no
ENSG00000189266	2763	7644	8034	390	4	95.1456	1	PNRC2	23956839	23963462	proline rich nuclear...	no	no	no	no
ENSG00000188529	11860	9681	9747	66	0	99.3229	1	SRSF10	23964347	23980927	serine and arginine ...	no	no	no	no
ENSG00000142661	9214	26	26	0	0	100	1	MYOM3	24056035	24112135	myomesin 3 [Source:H...	no	no	no	no
ENSG00000142677	2817	31	31	0	0	100	1	IL22RA1	24119771	24143140	interleukin 22 recep...	no	no	no	no
ENSG00000185436	4940	669	669	0	0	100	1	IFNLR1	24154168	24187959	interferon lambda re...	no	no	no	no
ENSG00000230023	1849	6	6	0	0	100	1	LINC02800	24200240	24211693	long intergenic non-...	no	no	no	no
ENSG00000232298	856	2	2	0	0	100	1	GRHL3-AS1	24307556	24321901	GRHL3 antisense RNA ...	no	no	no	no
ENSG00000158055	3905	26	26	0	0	100	1	GRHL3	24199558	24364482	grainyhead like tran...	no	no	no	no
ENSG00000001460	8511	588	592	4	0	99.3243	1	STPG1	24356999	24416934	sperm tail PG-rich r...	no	no	no	no
ENSG00000001461	9396	817	833	16	1	98.0792	1	NIPAL3	24415802	24472976	NIPA like domain con...	no	no	no	no
ENSG00000286061	762	3	3	0	0	100	1	RCAN3AS	24496254	24535400	RCAN3 antisense RNA ...	no	no	no	no
ENSG00000117602	7138	915	927	12	1	98.7055	1	RCAN3	24502351	24541040	RCAN family member 3...	no	no	no	no
ENSG00000184454	4146	17	17	0	0	100	1	NCMAP	24556087	24609328	non-compact myelin a...	no	no	no	no
ENSG00000133226	7922	16051	16305	254	1	98.4422	1	SRRM1	24631716	24673281	serine and arginine ...	no	no	no	no
ENSG00000169504	4467	19828	19860	32	0	99.8389	1	CLIC4	24745382	24844321	chloride intracellul...	no	no	no	no
ENSG00000020633	4922	21	21	0	0	100	1	RUNX3	24899511	24965121	RUNX family transcri...	no	no	no	no
ENSG00000229162	820	2	2	0	0	100	1	RUNX3-AS1	24961345	24963097	RUNX3 antisense RNA ...	no	no	no	no
ENSG00000117614	3773	2106	2106	0	0	100	1	SYF2	25222276	25232502	SYF2 pre-mRNA splici...	no	no	no	no
ENSG00000284602	2190	36	36	0	0	100	1		25232586	25234775	novel transcript	no	no	no	no
ENSG00000284657	760	11	11	0	0	100	1		25239494	25240253	novel transcript	no	no	no	no
ENSG00000117616	6730	2682	2904	222	7	92.3554	1	RSRP1	25242249	25338213	arginine and serine ...	no	no	no	no
ENSG00000272432	485	24	24	0	0	100	1		25247837	25248321	novel transcript	no	no	no	no
ENSG00000261349	459	21	50	29	58	42	1		25266102	25267136	novel pseudogene	no	no	no	no
ENSG00000187010	3313	23	24	1	4	95.8333	1	RHD	25272393	25330445	Rh blood group D ant...	no	no	no	no
ENSG00000224183	480	10	10	0	0	100	1	SDHDP6	25294164	25294643	succinate dehydrogen...	no	no	no	no
ENSG00000259984	459	17	20	3	15	85	1		25336429	25337465	novel pseudogene	no	no	no	no
ENSG00000183726	3010	3597	3617	20	0	99.4471	1	TMEM50A	25338317	25362361	transmembrane protei...	no	no	no	no
ENSG00000188672	2433	10	10	0	0	100	1	RHCE	25362249	25430192	Rh blood group CcEe ...	no	no	no	no
ENSG00000238084	478	2	2	0	0	100	1		25398721	25399198	succinate dehydrogen...	no	no	no	no
ENSG00000204178	3979	794	794	0	0	100	1	MACO1	25430858	25500209	macoilin 1 [Source:H...	no	no	no	no
ENSG00000157978	5371	858	858	0	0	100	1	LDLRAP1	25543606	25568886	low density lipoprot...	no	no	no	no
ENSG00000225643	483	14	14	0	0	100	1		25581478	25590356	novel transcript	no	no	no	no
ENSG00000117643	9026	466	466	0	0	100	1	MAN1C1	25616791	25786206	mannosidase alpha cl...	no	no	no	no
ENSG00000162430	4421	7548	7620	72	0	99.0551	1	SELENON	25800193	25818221	selenoprotein N [Sou...	no	no	no	no
ENSG00000228172	2793	8	8	0	0	100	1		25816749	25820797	novel transcript	no	no	no	no
ENSG00000117640	5797	563	563	0	0	100	1	MTFR1L	25818640	25832942	mitochondrial fissio...	no	no	no	no
ENSG00000127423	2408	862	882	20	2	97.7324	1	AUNIP	25831913	25859458	aurora kinase A and ...	no	no	no	no
ENSG00000182749	3244	332	332	0	0	100	1	PAQR7	25861484	25875708	progestin and adipoQ...	no	no	no	no
ENSG00000117632	6247	21048	21296	248	1	98.8355	1	STMN1	25884181	25906991	stathmin 1 [Source:H...	no	no	no	no
ENSG00000229786	251	2	2	0	0	100	1	SNRPFP2	25887360	25887610	small nuclear ribonu...	no	no	no	no
ENSG00000223624	140	2	2	0	0	100	1		25888970	25889109	ribosomal protein L3...	no	no	no	no
ENSG00000158006	3795	749	757	8	1	98.9432	1	PAFAH2	25959767	25998117	platelet activating ...	no	no	no	no
ENSG00000158008	4542	48	48	0	0	100	1	EXTL1	26019884	26036464	exostosin like glyco...	no	no	no	no
ENSG00000158014	3483	4	4	0	0	100	1	SLC30A2	26037252	26046118	solute carrier famil...	no	no	no	no
ENSG00000175087	4560	261	261	0	0	100	1	PDIK1L	26111165	26125555	PDLIM1 interacting k...	no	no	no	no
ENSG00000197245	2799	51	51	0	0	100	1	FAM110D	26159079	26163962	family with sequence...	no	no	no	no
ENSG00000282872	1203	1	1	0	0	100	1	C1orf232	26164101	26168963	chromosome 1 open re...	no	no	no	no
ENSG00000236782	2073	11	11	0	0	100	1	ZNF593OS	26169516	26171832	ZNF593 opposite stra...	no	no	no	no
ENSG00000142675	3960	1008	1016	8	0	99.2126	1	CNKSR1	26177484	26189884	connector enhancer o...	no	no	no	no
ENSG00000188782	2030	48	48	0	0	100	1	CATSPER4	26190561	26202968	cation channel sperm...	no	no	no	no
ENSG00000236155	3191	153	153	0	0	100	1	ZPLD2P	26209741	26229844	zona pellucida like ...	no	no	no	no
ENSG00000130695	5145	3354	3358	4	0	99.8809	1	CEP85	26234200	26278808	centrosomal protein ...	no	no	no	no
ENSG00000270733	358	6	6	0	0	100	1		26263041	26263398	mitochondrial riboso...	no	no	no	no
ENSG00000142669	876	2128	2128	0	0	100	1	SH3BGRL3	26280086	26281522	SH3 domain binding g...	no	no	no	no
ENSG00000158062	4704	475	475	0	0	100	1	UBXN11	26281328	26318363	UBX domain protein 1...	no	no	no	no
ENSG00000169442	934	46	46	0	0	100	1	CD52	26317958	26320523	CD52 molecule [Sourc...	no	no	no	no
ENSG00000176092	6895	876	888	12	1	98.6486	1	CRYBG2	26321698	26360080	crystallin beta-gamm...	no	no	no	no
ENSG00000225854	346	2	2	0	0	100	1		26326688	26327033	ribosomal protein L3...	no	no	no	no
ENSG00000131914	3975	54873	55325	452	0	99.183	1	LIN28A	26410817	26429728	lin-28 homolog A [So...	no	no	no	no
ENSG00000117682	5608	1224	1232	8	0	99.3506	1	DHDDS	26432282	26471306	dehydrodolichyl diph...	no	no	no	no
ENSG00000223583	535	1	1	0	0	100	1		26454653	26455187	ribosomal protein L1...	no	no	no	no
ENSG00000225891	1261	25	25	0	0	100	1	DHDDS-AS1	26462756	26468014	DHDDS antisense RNA ...	no	no	no	no
ENSG00000198830	3189	16715	19525	2810	14	85.6082	1	HMGN2	26472440	26476642	high mobility group ...	no	no	no	no
ENSG00000117676	5884	2594	2610	16	0	99.387	1	RPS6KA1	26529761	26575030	ribosomal protein S6...	no	no	no	no
ENSG00000260063	2000	2	2	0	0	100	1		26692132	26694131	novel transcript, an...	no	no	no	no
ENSG00000117713	15939	8795	8839	44	0	99.5022	1	ARID1A	26693236	26782104	AT-rich interaction ...	no	no	no	no
ENSG00000060642	5872	746	750	4	0	99.4667	1	PIGV	26787054	26800659	phosphatidylinositol...	no	no	no	no
ENSG00000241188	291	2	2	0	0	100	1	RN7SL165P	26814822	26815112	RNA, 7SL, cytoplasmi...	no	no	no	no
ENSG00000204160	5460	1794	1796	2	0	99.8886	1	ZDHHC18	26826688	26857604	zinc finger DHHC-typ...	no	no	no	no
ENSG00000175793	1308	432	436	4	0	99.0826	1	SFN	26863149	26864456	stratifin [Source:HG...	no	no	no	no
ENSG00000142751	4966	1044	1044	0	0	100	1	GPN2	26876132	26890283	GPN-loop GTPase 2 [S...	no	no	no	no
ENSG00000198746	2226	521	521	0	0	100	1	GPATCH3	26890488	26900467	G-patch domain conta...	no	no	no	no
ENSG00000090273	2848	7741	7841	100	1	98.7247	1	NUDC	26900238	26946871	nuclear distribution...	no	no	no	no
ENSG00000175707	1855	734	742	8	1	98.9218	1	KDF1	26949562	26960468	keratinocyte differe...	no	no	no	no
ENSG00000172746	497	2	2	0	0	100	1	RPL12P13	26980165	26980975	ribosomal protein L1...	no	no	no	no
ENSG00000224064	397	14	14	0	0	100	1	RPL32P6	26983628	26984024	ribosomal protein L3...	no	no	no	no
ENSG00000225294	444	2	2	0	0	100	1	OSTCP2	26985897	26986340	oligosaccharyltransf...	no	no	no	no
ENSG00000253368	1979	1102	1110	8	0	99.2793	1	TRNP1	26993692	27000886	TMF1 regulated nucle...	no	no	no	no
ENSG00000158246	2382	2508	2524	16	0	99.3661	1	TENT5B	27005020	27012850	terminal nucleotidyl...	no	no	no	no
ENSG00000090020	6195	1476	1480	4	0	99.7297	1	SLC9A1	27098809	27166981	solute carrier famil...	no	no	no	no
ENSG00000229985	527	1	1	0	0	100	1		27176751	27177277	ribosomal protein L1...	no	no	no	no
ENSG00000225159	867	22	44	22	50	50	1	NPM1P39	27206930	27207796	nucleophosmin 1 pseu...	no	no	no	no
ENSG00000142784	5911	1767	1775	8	0	99.5493	1	WDTC1	27234632	27308636	WD and tetratricopep...	no	no	no	no
ENSG00000252098	104	1	1	0	0	100	1		27255464	27255567	Y RNA [Source:RFAM;A...	no	no	no	no
ENSG00000243659	282	1	1	0	0	100	1		27311240	27311838	SMT3 suppressor of m...	no	no	no	no
ENSG00000186501	4476	900	908	8	0	99.1189	1	TMEM222	27322145	27336400	transmembrane protei...	no	no	no	no
ENSG00000206888	107	1	1	0	0	100	1	RNU6-48P	27325219	27325325	RNA, U6 small nuclea...	no	no	no	no
ENSG00000241547	468	10	10	0	0	100	1	ACTG1P20	27325329	27325796	actin gamma 1 pseudo...	no	no	no	no
ENSG00000142765	5584	548	548	0	0	100	1	SYTL1	27342020	27353937	synaptotagmin like 1...	no	no	no	no
ENSG00000142733	5746	727	727	0	0	100	1	MAP3K6	27355184	27366961	mitogen-activated pr...	no	no	no	no
ENSG00000142748	2169	46	46	0	0	100	1	FCN3	27369110	27374824	ficolin 3 [Source:HG...	no	no	no	no
ENSG00000174950	1994	344	372	28	7	92.4731	1	CD164L2	27379176	27383333	CD164 molecule like ...	no	no	no	no
ENSG00000181773	2137	635	635	0	0	100	1	GPR3	27392622	27395814	G protein-coupled re...	no	no	no	no
ENSG00000158195	5681	12656	12710	54	0	99.5751	1	WASF2	27404230	27490167	WASP family member 2...	no	no	no	no
ENSG00000237429	283	8	8	0	0	100	1		27525805	27530561	novel transcript	no	no	no	no
ENSG00000126705	8297	2209	2217	8	0	99.6392	1	AHDC1	27534035	27604431	AT-hook DNA binding ...	no	no	no	no
ENSG00000000938	3382	27	27	0	0	100	1	FGR	27612064	27635185	FGR proto-oncogene, ...	no	no	no	no
ENSG00000235912	192	6	6	0	0	100	1		27649419	27649610	novel pseudogene	no	no	no	no
ENSG00000126709	842	80	80	0	0	100	1	IFI6	27666064	27672212	interferon alpha ind...	no	no	no	no
ENSG00000009780	4046	509	521	12	2	97.6967	1	FAM76A	27725961	27763116	family with sequence...	no	no	no	no
ENSG00000231344	349	1	1	0	0	100	1		27739091	27739439	novel pseudogene	no	no	no	no
ENSG00000117758	3801	754	754	0	0	100	1	STX12	27773219	27824443	syntaxin 12 [Source:...	no	no	no	no
ENSG00000270031	359	1	1	0	0	100	1		27819983	27820341	novel transcript, se...	no	no	no	no
ENSG00000117751	2815	1918	1918	0	0	100	1	PPP1R8	27830782	27851676	protein phosphatase ...	no	no	no	no
ENSG00000252947	166	4	4	0	0	100	1	SCARNA1	27834401	27834566	small Cajal body-spe...	no	no	no	no
ENSG00000130775	4621	547	549	2	0	99.6357	1	THEMIS2	27872543	27886685	thymocyte selection ...	no	no	no	no
ENSG00000117748	1981	2149	2149	0	0	100	1	RPA2	27891524	27914746	replication protein ...	no	no	no	no
ENSG00000130768	2663	856	980	124	12	87.3469	1	SMPDL3B	27935000	27959157	sphingomyelin phosph...	no	no	no	no
ENSG00000227050	491	14	14	0	0	100	1		27938875	27960193	novel transcript	no	no	no	no
ENSG00000158156	5180	906	910	4	0	99.5604	1	XKR8	27959588	27968093	XK related 8 [Source...	no	no	no	no
ENSG00000158161	6424	2085	2089	4	0	99.8085	1	EYA3	27970344	28088637	EYA transcriptional ...	no	no	no	no
ENSG00000238231	367	5	5	0	0	100	1		27990158	27990524	interferon-induced t...	no	no	no	no
ENSG00000228589	681	8	250	242	96	3.2	1	SPCS2P4	28095742	28096422	signal peptidase com...	no	no	no	no
ENSG00000169403	4208	74	74	0	0	100	1	PTAFR	28147166	28193936	platelet activating ...	no	no	no	no
ENSG00000126698	2892	5954	5966	12	0	99.7989	1	DNAJC8	28199456	28233029	DnaJ heat shock prot...	no	no	no	no
ENSG00000130770	2225	3131	3152	21	0	99.3338	1	ATP5IF1	28236109	28246906	ATP synthase inhibit...	no	no	no	no
ENSG00000270605	1945	293	297	4	1	98.6532	1		28239509	28241453	novel transcript	no	no	no	no
ENSG00000271398	425	4	4	0	0	100	1		28247144	28247568	novel transcript	no	no	no	no
ENSG00000130766	3462	1575	1587	12	0	99.2439	1	SESN2	28259518	28282491	sestrin 2 [Source:HG...	no	no	no	no
ENSG00000130772	2017	622	642	20	3	96.8847	1	MED18	28329002	28335965	mediator complex sub...	no	no	no	no
ENSG00000204138	7317	2938	3000	62	2	97.9333	1	PHACTR4	28369582	28500364	phosphatase and acti...	no	no	no	no
ENSG00000180198	3888	5319	5357	38	0	99.2906	1	RCC1	28505943	28539300	regulator of chromos...	no	no	no	no
ENSG00000242125	4088	5073	5103	30	0	99.4121	1	SNHG3	28505980	28510892	small nucleolar RNA ...	no	no	no	no
ENSG00000200087	204	61	61	0	0	100	1	SNORA73B	28508559	28508762	small nucleolar RNA,...	no	no	no	no
ENSG00000231468	611	10	10	0	0	100	1	PRDX3P2	28526318	28527227	peroxiredoxin 3 pseu...	no	no	no	no
ENSG00000279443	2083	12	14	2	14	85.7143	1		28544460	28546542	TEC	no	no	no	no
ENSG00000180098	4311	706	706	0	0	100	1	TRNAU1AP	28553085	28578545	tRNA selenocysteine ...	no	no	no	no
ENSG00000197989	4266	1101	1105	4	0	99.638	1	SNHG12	28578538	28583132	small nucleolar RNA ...	no	no	no	no
ENSG00000221539	74	23	23	0	0	100	1	SNORD99	28578749	28578822	small nucleolar RNA,...	no	no	no	no
ENSG00000120656	2337	1062	1062	0	0	100	1	TAF12	28587829	28648291	TATA-box binding pro...	no	no	no	no
ENSG00000188060	2200	273	275	2	0	99.2727	1	RAB42	28592200	28595449	RAB42, member RAS on...	no	no	no	no
ENSG00000162419	6459	1527	1531	4	0	99.7387	1	GMEB1	28668778	28719353	glucocorticoid modul...	no	no	no	no
ENSG00000252777	130	1	1	0	0	100	1		28689665	28689794		no	no	no	no
ENSG00000198492	3729	6772	6811	39	0	99.4274	1	YTHDF2	28736621	28769775	YTH N6-methyladenosi...	no	no	no	no
ENSG00000116329	9345	279	279	0	0	100	1	OPRD1	28812170	28871267	opioid receptor delt...	no	no	no	no
ENSG00000159023	19993	6047	6079	32	0	99.4736	1	EPB41	28887091	29120046	erythrocyte membrane...	no	no	no	no
ENSG00000253304	2606	182	182	0	0	100	1	TMEM200B	29119429	29123903	transmembrane protei...	no	no	no	no
ENSG00000225750	279	4	4	0	0	100	1		29144494	29146994	novel transcript	no	no	no	no
ENSG00000116350	8806	7950	7978	28	0	99.649	1	SRSF4	29147743	29181900	serine and arginine ...	no	no	no	no
ENSG00000116353	4138	1279	1287	8	0	99.3784	1	MECR	29192657	29230942	mitochondrial trans-...	no	no	no	no
ENSG00000237934	573	10	10	0	0	100	1		29223933	29224816	novel transcript	no	no	no	no
ENSG00000060656	6682	4276	4276	0	0	100	1	PTPRU	29236516	29326813	protein tyrosine pho...	no	no	no	no
ENSG00000230523	2148	4	4	0	0	100	1	LINC01756	29329620	29350114	long intergenic non-...	no	no	no	no
ENSG00000233399	1519	1	1	0	0	100	1	LINC01648	30013952	30037612	long intergenic non-...	no	no	no	no
ENSG00000162510	4604	16	16	0	0	100	1	MATN1	30711277	30723585	matrilin 1 [Source:H...	no	no	no	no
ENSG00000186056	4024	31	31	0	0	100	1	MATN1-AS1	30718504	30726827	MATN1 antisense RNA ...	no	no	no	no
ENSG00000162511	3228	15	15	0	0	100	1	LAPTM5	30732469	30757774	lysosomal protein tr...	no	no	no	no
ENSG00000162512	7065	3566	3578	12	0	99.6646	1	SDC3	30869466	30908758	syndecan 3 [Source:H...	no	no	no	no
ENSG00000134644	6621	7677	7777	100	1	98.7142	1	PUM1	30931506	31065991	pumilio RNA binding ...	no	no	no	no
ENSG00000232768	163	1	1	0	0	100	1		31050872	31051034	ribosomal protein S2...	no	no	no	no
ENSG00000084628	3320	2525	2533	8	0	99.6842	1	NKAIN1	31179745	31239887	sodium/potassium tra...	no	no	no	no
ENSG00000060688	3887	3392	3408	16	0	99.5305	1	SNRNP40	31259568	31296788	small nuclear ribonu...	no	no	no	no
ENSG00000229447	437	31	31	0	0	100	1		31263245	31263681	general transcriptio...	no	no	no	no
ENSG00000121766	1921	1518	1526	8	0	99.4758	1	ZCCHC17	31296982	31364953	zinc finger CCHC-typ...	no	no	no	no
ENSG00000121769	1398	438	446	8	1	98.2063	1	FABP3	31365253	31376850	fatty acid binding p...	no	no	no	no
ENSG00000168528	3452	1796	1842	46	2	97.5027	1	SERINC2	31409565	31434680	serine incorporator ...	no	no	no	no
ENSG00000284543	9848	6	6	0	0	100	1	LINC01226	31506226	31583306	long intergenic non-...	no	no	no	no
ENSG00000142910	5281	934	940	6	0	99.3617	1	TINAGL1	31576485	31587686	tubulointerstitial n...	no	no	no	no
ENSG00000121764	2558	21	21	0	0	100	1	HCRTR1	31617686	31632518	hypocretin receptor ...	no	no	no	no
ENSG00000162517	2223	1208	1211	3	0	99.7523	1	PEF1	31629866	31644896	penta-EF-hand domain...	no	no	no	no
ENSG00000235790	2216	23	23	0	0	100	1	PEF1-AS1	31644049	31660162	PEF1 and COL16A1 ant...	no	no	no	no
ENSG00000084636	9253	701	701	0	0	100	1	COL16A1	31652263	31704319	collagen type XVI al...	no	no	no	no
ENSG00000121753	7756	1723	1723	0	0	100	1	ADGRB2	31727117	31764893	adhesion G protein-c...	no	no	no	no
ENSG00000266580	76	4	4	0	0	100	1	MIR4254	31758660	31758735	microRNA 4254 [Sourc...	no	no	no	no
ENSG00000134668	7085	154	154	0	0	100	1	SPOCD1	31790422	31816022	SPOC domain containi...	no	no	no	no
ENSG00000184007	6708	7229	7336	107	1	98.5414	1	PTP4A2	31906421	31944856	protein tyrosine pho...	no	no	no	no
ENSG00000121774	3544	18502	18914	412	2	97.8217	1	KHDRBS1	32013868	32060850	KH RNA binding domai...	no	no	no	no
ENSG00000121775	2787	712	716	4	0	99.4413	1	TMEM39B	32072031	32102866	transmembrane protei...	no	no	no	no
ENSG00000025800	7457	5428	5456	28	0	99.4868	1	KPNA6	32108056	32176563	karyopherin subunit ...	no	no	no	no
ENSG00000084652	5114	4189	4201	12	0	99.7144	1	TXLNA	32179675	32198285	taxilin alpha [Sourc...	no	no	no	no
ENSG00000160050	2609	478	478	0	0	100	1	CCDC28B	32200595	32205453	coiled-coil domain c...	no	no	no	no
ENSG00000224066	1357	5	5	0	0	100	1		32204769	32206814	novel transcript	no	no	no	no
ENSG00000160051	2463	190	190	0	0	100	1	IQCC	32205671	32208682	IQ motif containing ...	no	no	no	no
ENSG00000222046	1869	4	4	0	0	100	1	DCDC2B	32209089	32216192	doublecortin domain ...	no	no	no	no
ENSG00000160055	3571	270	270	0	0	100	1	TMEM234	32214472	32222359	transmembrane protei...	no	no	no	no
ENSG00000084623	1725	9837	9941	104	1	98.9538	1	EIF3I	32221077	32245397	eukaryotic translati...	no	no	no	no
ENSG00000220785	2961	717	717	0	0	100	1	MTMR9LP	32231847	32241592	myotubularin related...	no	no	no	no
ENSG00000183615	947	286	286	0	0	100	1	FAM167B	32247222	32248856	family with sequence...	no	no	no	no
ENSG00000182866	3339	3860	3870	10	0	99.7416	1	LCK	32251244	32286165	LCK proto-oncogene, ...	no	no	no	no
ENSG00000116478	3966	4770	4770	0	0	100	1	HDAC1	32292083	32333635	histone deacetylase ...	no	no	no	no
ENSG00000175130	1546	21578	21722	144	0	99.3371	1	MARCKSL1	32333839	32336233	MARCKS like 1 [Sourc...	no	no	no	no
ENSG00000162526	1849	35	35	0	0	100	1	TSSK3	32351521	32364312	testis specific seri...	no	no	no	no
ENSG00000225828	2845	230	230	0	0	100	1	FAM229A	32361270	32364278	family with sequence...	no	no	no	no
ENSG00000160058	6741	2640	2648	8	0	99.6979	1	BSDC1	32364633	32394731	BSD domain containin...	no	no	no	no
ENSG00000224333	1007	4	4	0	0	100	1	GAPDHP20	32402109	32403115	glyceraldehyde 3 pho...	no	no	no	no
ENSG00000229259	1801	7	7	0	0	100	1	LRRC37A12P	32423214	32426789	leucine rich repeat ...	no	no	no	no
ENSG00000273274	12831	552	552	0	0	100	1	ZBTB8B	32465072	32496686	zinc finger and BTB ...	no	no	no	no
ENSG00000160062	7077	524	524	0	0	100	1	ZBTB8A	32539427	32605941	zinc finger and BTB ...	no	no	no	no
ENSG00000176261	3531	849	853	4	0	99.5311	1	ZBTB8OS	32600172	32650903	zinc finger and BTB ...	no	no	no	no
ENSG00000200591	102	3	3	0	0	100	1		32639951	32640052	Y RNA [Source:RFAM;A...	no	no	no	no
ENSG00000162521	9470	8835	8981	146	1	98.3743	1	RBBP4	32651142	32686211	RB binding protein 4...	no	no	no	no
ENSG00000162520	3722	1	1	0	0	100	1	SYNC	32679906	32703596	syncoilin, intermedi...	no	no	no	no
ENSG00000162522	6020	6190	6198	8	0	99.8709	1	KIAA1522	32741830	32774970	KIAA1522 [Source:HGN...	no	no	no	no
ENSG00000134684	9897	9958	10002	44	0	99.5601	1	YARS1	32775237	32818031	tyrosyl-tRNA synthet...	no	no	no	no
ENSG00000116497	9190	2704	2737	33	1	98.7943	1	S100PBP	32816767	32858875	S100P binding protei...	no	no	no	no
ENSG00000160097	3199	52	52	0	0	100	1	FNDC5	32862268	32872482	fibronectin type III...	no	no	no	no
ENSG00000121905	1964	118	118	0	0	100	1	HPCA	32885994	32898441	hippocalcin [Source:...	no	no	no	no
ENSG00000121900	1417	100	100	0	0	100	1	TMEM54	32894594	32901438	transmembrane protei...	no	no	no	no
ENSG00000287691	575	3	3	0	0	100	1		32925454	32951638	novel transcript, an...	no	no	no	no
ENSG00000116514	2610	776	800	24	3	97	1	RNF19B	32936445	32964809	ring finger protein ...	no	no	no	no
ENSG00000004455	9625	7093	7134	41	0	99.4253	1	AK2	33007986	33080996	adenylate kinase 2 [...	no	no	no	no
ENSG00000276645	345	2	2	0	0	100	1		33029232	33029576	Metazoan signal reco...	no	no	no	no
ENSG00000142920	9581	55	55	0	0	100	1	AZIN2	33081104	33123492	antizyme inhibitor 2...	no	no	no	no
ENSG00000278997	1360	23	23	0	0	100	1		33141871	33143230	TEC	no	no	no	no
ENSG00000116525	3976	554	558	4	0	99.2832	1	TRIM62	33145399	33182059	tripartite motif con...	no	no	no	no
ENSG00000279179	3448	35	39	4	10	89.7436	1		33162851	33166298	TEC	no	no	no	no
ENSG00000160094	3384	998	998	0	0	100	1	ZNF362	33256492	33300719	zinc finger protein ...	no	no	no	no
ENSG00000270115	469	18	18	0	0	100	1		33261212	33261680	novel transcript	no	no	no	no
ENSG00000184389	1023	3	3	0	0	100	1	A3GALT2	33306766	33321098	alpha 1,3-galactosyl...	no	no	no	no
ENSG00000225313	4015	17	17	0	0	100	1		33307348	33349245	novel transcript	no	no	no	no
ENSG00000134686	4975	726	741	15	2	97.9757	1	PHC2	33323623	33431095	polyhomeotic homolog...	no	no	no	no
ENSG00000233246	490	4	4	0	0	100	1	PHC2-AS1	33350352	33363245	PHC2 antisense RNA 1...	no	no	no	no
ENSG00000121903	5308	183	183	0	0	100	1	ZSCAN20	33472645	33501643	zinc finger and SCAN...	no	no	no	no
ENSG00000235907	736	4	4	0	0	100	1		33512008	33512743	proteasome (prosome,...	no	no	no	no
ENSG00000121904	18157	1601	1607	6	0	99.6266	1	CSMD2	33513998	34165842	CUB and Sushi multip...	no	no	no	no
ENSG00000176256	2561	4	4	0	0	100	1	HMGB4	33860475	33864791	high mobility group ...	no	no	no	no
ENSG00000231163	2619	2	2	0	0	100	1	CSMD2-AS1	33868953	33893726	CSMD2 antisense RNA ...	no	no	no	no
ENSG00000142698	3339	329	329	0	0	100	1	C1orf94	34166883	34219131	chromosome 1 open re...	no	no	no	no
ENSG00000163866	10337	1031	1039	8	0	99.23	1	SMIM12	34712737	34859755	small integral membr...	no	no	no	no
ENSG00000189280	1355	14	14	0	0	100	1	GJB5	34755047	34758512	gap junction protein...	no	no	no	no
ENSG00000189433	1444	2	2	0	0	100	1	GJB4	34759740	34762327	gap junction protein...	no	no	no	no
ENSG00000188910	2362	20	20	0	0	100	1	GJB3	34781214	34786369	gap junction protein...	no	no	no	no
ENSG00000187513	1716	36	36	0	0	100	1	GJA4	34792999	34795747	gap junction protein...	no	no	no	no
ENSG00000116544	4042	495	495	0	0	100	1	DLGAP3	34865436	34929650	DLG associated prote...	no	no	no	no
ENSG00000284773	3163	43	43	0	0	100	1		34974356	34985313	novel protein	no	no	no	no
ENSG00000241014	1887	24	24	0	0	100	1	GPR199P	34975699	34978706	G protein-coupled re...	no	no	no	no
ENSG00000163867	9568	447	447	0	0	100	1	ZMYM6	34986165	35031945	zinc finger MYM-type...	no	no	no	no
ENSG00000197056	5205	1466	1468	2	0	99.8638	1	ZMYM1	35032172	35115859	zinc finger MYM-type...	no	no	no	no
ENSG00000284640	1886	4	4	0	0	100	1		35141515	35146435	novel transcript	no	no	no	no
ENSG00000116560	7419	19570	19678	108	0	99.4512	1	SFPQ	35176378	35193446	splicing factor prol...	no	no	no	no
ENSG00000146463	7905	6306	6328	22	0	99.6523	1	ZMYM4	35268709	35422058	zinc finger MYM-type...	no	no	no	no
ENSG00000229994	886	2	2	0	0	100	1	RPL5P4	35350722	35351607	ribosomal protein L5...	no	no	no	no
ENSG00000227409	459	1	1	0	0	100	1	ZMYM4-AS1	35358822	35366077	ZMYM4 antisense RNA ...	no	no	no	no
ENSG00000142687	9619	6356	6403	47	0	99.266	1	KIAA0319L	35393883	35557950	KIAA0319 like [Sourc...	no	no	no	no
ENSG00000020129	4917	2056	2076	20	0	99.0366	1	NCDN	35557473	35567274	neurochondrin [Sourc...	no	no	no	no
ENSG00000239636	1030	11	11	0	0	100	1	TFAP2E-AS1	35569807	35577779	TFAP2E antisense RNA...	no	no	no	no
ENSG00000116819	2272	20	20	0	0	100	1	TFAP2E	35573314	35595328	transcription factor...	no	no	no	no
ENSG00000126067	4528	6242	6258	16	0	99.7443	1	PSMB2	35599541	35641526	proteasome 20S subun...	no	no	no	no
ENSG00000142686	3049	515	515	0	0	100	1	C1orf216	35713877	35718894	chromosome 1 open re...	no	no	no	no
ENSG00000092853	9591	1881	1901	20	1	98.9479	1	CLSPN	35720218	35769978	claspin [Source:HGNC...	no	no	no	no
ENSG00000134698	7423	1401	1411	10	0	99.2913	1	AGO4	35808016	35857890	argonaute RISC compo...	no	no	no	no
ENSG00000092847	13890	5269	5301	32	0	99.3963	1	AGO1	35869808	35930532	argonaute RISC compo...	no	no	no	no
ENSG00000126070	21153	2440	2448	8	0	99.6732	1	AGO3	35930718	36072500	argonaute RISC catal...	no	no	no	no
ENSG00000271554	659	3	3	0	0	100	1		35992109	36013630	novel transcript, an...	no	no	no	no
ENSG00000092850	1959	78	78	0	0	100	1	TEKT2	36084094	36088275	tektin 2 [Source:HGN...	no	no	no	no
ENSG00000116863	1651	1122	1130	8	0	99.292	1	ADPRS	36088892	36093932	ADP-ribosylserine hy...	no	no	no	no
ENSG00000171812	4669	212	212	0	0	100	1	COL8A2	36095239	36125222	collagen type VIII a...	no	no	no	no
ENSG00000054116	3527	2059	2066	7	0	99.6612	1	TRAPPC3	36136570	36156053	trafficking protein ...	no	no	no	no
ENSG00000116871	5271	3934	3950	16	0	99.5949	1	MAP7D1	36155579	36180849	MAP7 domain containi...	no	no	no	no
ENSG00000054118	4720	11733	11751	18	0	99.8468	1	THRAP3	36224432	36305357	thyroid hormone rece...	no	no	no	no
ENSG00000214193	8142	2735	2777	42	1	98.4876	1	SH3D21	36306368	36329340	SH3 domain containin...	no	no	no	no
ENSG00000286379	4878	191	191	0	0	100	1		36329630	36335406	novel transcript	no	no	no	no
ENSG00000196182	5618	1324	1324	0	0	100	1	STK40	36339624	36385924	serine/threonine kin...	no	no	no	no
ENSG00000181817	1506	1012	1012	0	0	100	1	LSM10	36391238	36397908	LSM10, U7 small nucl...	no	no	no	no
ENSG00000116885	2788	91	91	0	0	100	1	OSCP1	36415827	36450451	organic solute carri...	no	no	no	no
ENSG00000116898	2863	3379	3395	16	0	99.5287	1	MRPS15	36455718	36464384	mitochondrial riboso...	no	no	no	no
ENSG00000284720	1521	2	2	0	0	100	1		36768122	36769725	novel transcript	no	no	no	no
ENSG00000163873	10497	143	143	0	0	100	1	GRIK3	36795527	37034515	glutamate ionotropic...	no	no	no	no
ENSG00000223944	3153	1	1	0	0	100	1		37154761	37325100	novel transcript	no	no	no	no
ENSG00000252368	110	1	1	0	0	100	1	RNA5SP43	37264677	37264786	RNA, 5S ribosomal ps...	no	no	no	no
ENSG00000233621	3019	27	27	0	0	100	1	ZC3H12A-DT	37350934	37474432	ZC3H12A divergent tr...	no	no	no	no
ENSG00000163874	3091	530	534	4	0	99.2509	1	ZC3H12A	37474580	37484377	zinc finger CCCH-typ...	no	no	no	no
ENSG00000163875	6061	1411	1439	28	1	98.0542	1	MEAF6	37489993	37514766	MYST/Esa1 associated...	no	no	no	no
ENSG00000263675	60	22	22	0	0	100	1	MIR5581	37500935	37500994	microRNA 5581 [Sourc...	no	no	no	no
ENSG00000163877	5718	960	968	8	0	99.1736	1	SNIP1	37534449	37554293	Smad nuclear interac...	no	no	no	no
ENSG00000237749	253	2	2	0	0	100	1		37556247	37556499	ribosomal protein S2...	no	no	no	no
ENSG00000163879	4456	762	762	0	0	100	1	DNALI1	37556919	37566857	dynein axonemal ligh...	no	no	no	no
ENSG00000134697	5747	5968	5968	0	0	100	1	GNL2	37566816	37595937	G protein nucleolar ...	no	no	no	no
ENSG00000169218	3058	8	8	0	0	100	1	RSPO1	37611350	37634892	R-spondin 1 [Source:...	no	no	no	no
ENSG00000116922	4434	1523	1539	16	1	98.9604	1	C1orf109	37681570	37692249	chromosome 1 open re...	no	no	no	no
ENSG00000134690	2406	3078	3086	8	0	99.7408	1	CDCA8	37692481	37709719	cell division cycle ...	no	no	no	no
ENSG00000183317	8152	155	159	4	2	97.4843	1	EPHA10	37713880	37765133	EPH receptor A10 [So...	no	no	no	no
ENSG00000185090	3018	82	82	0	0	100	1	MANEAL	37793847	37801137	mannosidase endo-alp...	no	no	no	no
ENSG00000196449	1848	756	756	0	0	100	1	YRDC	37802945	37808208	yrdC N6-threonylcarb...	no	no	no	no
ENSG00000197982	2231	673	673	0	0	100	1	C1orf122	37806979	37809454	chromosome 1 open re...	no	no	no	no
ENSG00000188786	7989	700	700	0	0	100	1	MTF1	37809574	37859592	metal regulatory tra...	no	no	no	no
ENSG00000204084	8930	1100	1103	3	0	99.728	1	INPP5B	37860697	37947057	inositol polyphospha...	no	no	no	no
ENSG00000222282	95	1	1	0	0	100	1	RNU6-584P	37885023	37885117	RNA, U6 small nuclea...	no	no	no	no
ENSG00000183431	3894	8499	8531	32	0	99.6249	1	SF3A3	37956975	37990075	splicing factor 3a s...	no	no	no	no
ENSG00000212541	108	3	5	2	40	60	1	RNU6-510P	37991462	37991569	RNA, U6 small nuclea...	no	no	no	no
ENSG00000183386	2004	1025	1037	12	1	98.8428	1	FHL3	37996770	38005606	four and a half LIM ...	no	no	no	no
ENSG00000183520	3381	2134	2158	24	1	98.8879	1	UTP11	38009258	38024820	UTP11 small subunit ...	no	no	no	no
ENSG00000185668	2965	3256	3264	8	0	99.7549	1	POU3F1	38043829	38046793	POU class 3 homeobox...	no	no	no	no
ENSG00000224592	684	150	150	0	0	100	1	MIR3659HG	38047314	38119025	MIR3659 host gene [S...	no	no	no	no
ENSG00000223589	340	4	4	0	0	100	1		38080572	38080911	FK506 binding protei...	no	no	no	no
ENSG00000265596	99	2	2	0	0	100	1	MIR3659	38089231	38089329	microRNA 3659 [Sourc...	no	no	no	no
ENSG00000284623	1562	20	20	0	0	100	1	LINC02786	38129464	38140593	long intergenic non-...	no	no	no	no
ENSG00000286552	1033	2	2	0	0	100	1		38149544	38162545	novel transcript	no	no	no	no
ENSG00000287987	1235	3	3	0	0	100	1		38193619	38210340	novel transcript	no	no	no	no
ENSG00000237290	2573	23	23	0	0	100	1	LINC01343	38209034	38214806	long intergenic non-...	no	no	no	no
ENSG00000275350	585	2	2	0	0	100	1		38383838	38384422	tubulin, beta 3 clas...	no	no	no	no
ENSG00000238063	3673	2	2	0	0	100	1	LINC01685	38474825	38516520	long intergenic non-...	no	no	no	no
ENSG00000116954	5116	303	308	5	1	98.3766	1	RRAGC	38838198	38859772	Ras related GTP bind...	no	no	no	no
ENSG00000228436	2004	9	9	0	0	100	1	RRAGC-DT	38859912	38965038	RRAGC divergent tran...	no	no	no	no
ENSG00000214114	2773	879	883	4	0	99.547	1	MYCBP	38862493	38873368	MYC binding protein ...	no	no	no	no
ENSG00000158315	2826	43	43	0	0	100	1	RHBDL2	38885807	38941830	rhomboid like 2 [Sou...	no	no	no	no
ENSG00000174574	2688	11688	11764	76	0	99.354	1	AKIRIN1	38991276	39006059	akirin 1 [Source:HGN...	no	no	no	no
ENSG00000168653	548	8493	8497	4	0	99.9529	1	NDUFS5	39026318	39034636	NADH:ubiquinone oxid...	no	no	no	no
ENSG00000127603	42738	31673	32238	565	1	98.2474	1	MACF1	39081316	39487177	microtubule actin cr...	no	no	no	no
ENSG00000217897	288	2	2	0	0	100	1	HSPE1P8	39304294	39304898	heat shock protein f...	no	no	no	no
ENSG00000183682	5636	213	220	7	3	96.8182	1	BMP8A	39491636	39529869	bone morphogenetic p...	no	no	no	no
ENSG00000237624	1535	52	126	74	58	41.2698	1	OXCT2P1	39514956	39516490	3-oxoacid CoA-transf...	no	no	no	no
ENSG00000243970	5416	476	476	0	0	100	1	PPIEL	39531838	39558707	peptidylprolyl isome...	no	no	no	no
ENSG00000090621	6782	10102	10193	91	0	99.1072	1	PABPC4	39560709	39576790	poly(A) binding prot...	no	no	no	no
ENSG00000228060	1408	141	141	0	0	100	1	PABPC4-AS1	39565052	39573860	PABPC4 antisense RNA...	no	no	no	no
ENSG00000201457	135	19	19	0	0	100	1	SNORA55	39567374	39567508	small nucleolar RNA,...	no	no	no	no
ENSG00000163909	4077	280	284	4	1	98.5915	1	HEYL	39623435	39639643	hes related family b...	no	no	no	no
ENSG00000116983	4758	270	270	0	0	100	1	HPCAL4	39678648	39691485	hippocalcin like 4 [...	no	no	no	no
ENSG00000084072	11124	2052	2056	4	0	99.8054	1	PPIE	39692182	39763914	peptidylprolyl isome...	no	no	no	no
ENSG00000116985	4826	63	70	7	10	90	1	BMP8B	39757182	39788865	bone morphogenetic p...	no	no	no	no
ENSG00000198754	1826	81	155	74	47	52.2581	1	OXCT2	39769523	39771348	3-oxoacid CoA-transf...	no	no	no	no
ENSG00000285905	1218	6	6	0	0	100	1	BMP8B-AS1	39779969	39781418	BMP8B antisense RNA ...	no	no	no	no
ENSG00000261798	1196	22	22	0	0	100	1		39788976	39790171	novel transcript, an...	no	no	no	no
ENSG00000284719	1744	2	2	0	0	100	1		39799419	39809450	novel transcript	no	no	no	no
ENSG00000043514	6533	1988	2008	20	0	99.004	1	TRIT1	39838110	39883511	tRNA isopentenyltran...	no	no	no	no
ENSG00000116990	5063	1916	1916	0	0	100	1	MYCL	39895426	39902256	MYCL proto-oncogene,...	no	no	no	no
ENSG00000168389	4007	876	876	0	0	100	1	MFSD2A	39955112	39969968	major facilitator su...	no	no	no	no
ENSG00000228477	725	38	38	0	0	100	1		39962680	39963404	ribosomal protein S2...	no	no	no	no
ENSG00000131236	3814	11236	11338	102	0	99.1004	1	CAP1	40040233	40072649	cyclase associated a...	no	no	no	no
ENSG00000131238	3372	7604	7696	92	1	98.8046	1	PPT1	40072710	40097260	palmitoyl-protein th...	no	no	no	no
ENSG00000117000	6232	2681	2681	0	0	100	1	RLF	40161387	40240921	RLF zinc finger [Sou...	no	no	no	no
ENSG00000259943	1541	280	280	0	0	100	1	ZMPSTE24-DT	40256333	40257971	ZMPSTE24 divergent t...	no	no	no	no
ENSG00000084073	4022	1487	1491	4	0	99.7317	1	ZMPSTE24	40258041	40294180	zinc metallopeptidas...	no	no	no	no
ENSG00000049089	4215	244	244	0	0	100	1	COL9A2	40300489	40317813	collagen type IX alp...	no	no	no	no
ENSG00000084070	3601	318	318	0	0	100	1	SMAP2	40344850	40423326	small ArfGAP2 [Sourc...	no	no	no	no
ENSG00000187801	2566	285	285	0	0	100	1	ZFP69B	40450102	40463718	ZFP69 zinc finger pr...	no	no	no	no
ENSG00000260920	2449	240	242	2	0	99.1736	1		40464319	40466767	novel transcript, se...	no	no	no	no
ENSG00000279667	1005	37	37	0	0	100	1		40473055	40474059	TEC	no	no	no	no
ENSG00000187815	3173	243	247	4	1	98.3806	1	ZFP69	40477290	40496343	ZFP69 zinc finger pr...	no	no	no	no
ENSG00000238287	605	10	10	0	0	100	1	EXO5-DT	40493157	40508661	EXO5 divergent trans...	no	no	no	no
ENSG00000164002	3092	68	68	0	0	100	1	EXO5	40508741	40516038	exonuclease 5 [Sourc...	no	no	no	no
ENSG00000238186	546	11	11	0	0	100	1		40515754	40517174	novel transcript	no	no	no	no
ENSG00000117010	3101	261	261	0	0	100	1	ZNF684	40531573	40548167	zinc finger protein ...	no	no	no	no
ENSG00000117016	7259	2871	2895	24	0	99.171	1	RIMS3	40620680	40665682	regulating synaptic ...	no	no	no	no
ENSG00000287743	1672	2	2	0	0	100	1		40659848	40667480	novel transcript, an...	no	no	no	no
ENSG00000237899	471	5	5	0	0	100	1		40669089	40687588	novel transcript	no	no	no	no
ENSG00000272145	1687	114	114	0	0	100	1	NFYC-AS1	40690380	40692074	NFYC antisense RNA 1...	no	no	no	no
ENSG00000066136	5990	1728	1790	62	3	96.5363	1	NFYC	40691648	40771603	nuclear transcriptio...	no	no	no	no
ENSG00000117013	4408	328	330	2	0	99.3939	1	KCNQ4	40783787	40840452	potassium voltage-ga...	no	no	no	no
ENSG00000179862	1310	516	516	0	0	100	1	CITED4	40861054	40862363	Cbp/p300 interacting...	no	no	no	no
ENSG00000171793	11164	4700	4712	12	0	99.7453	1	CTPS1	40979300	41012565	CTP synthase 1 [Sour...	no	no	no	no
ENSG00000281207	4800	160	160	0	0	100	1	SLFNL1-AS1	41014590	41043890	SLFNL1 antisense RNA...	no	no	no	no
ENSG00000171790	4310	28	28	0	0	100	1	SLFNL1	41015589	41023237	schlafen like 1 [Sou...	no	no	no	no
ENSG00000010803	4447	826	826	0	0	100	1	SCMH1	41027202	41242306	Scm polycomb group p...	no	no	no	no
ENSG00000215893	499	7	7	0	0	100	1	RPL23AP17	41098638	41099136	ribosomal protein L2...	no	no	no	no
ENSG00000287400	4437	12	12	0	0	100	1		41241772	41338644	novel transcript, an...	no	no	no	no
ENSG00000235358	2252	4	4	0	0	100	1	SCMH1-DT	41242373	41284861	SCMH1 divergent tran...	no	no	no	no
ENSG00000286640	1348	4	4	0	0	100	1		41302938	41303972	SET domain and marin...	no	no	no	no
ENSG00000204060	2398	193	193	0	0	100	1	FOXO6	41361922	41383590	forkhead box O6 [Sou...	no	no	no	no
ENSG00000127129	1649	8	8	0	0	100	1	EDN2	41478775	41484683	endothelin 2 [Source...	no	no	no	no
ENSG00000127124	14625	16	16	0	0	100	1	HIVEP3	41506365	42035925	HIVEP zinc finger 3 ...	no	no	no	no
ENSG00000230638	2242	2	2	0	0	100	1		41542069	41544310	novel pseudogene	no	no	no	no
ENSG00000198815	6896	4598	4602	4	0	99.9131	1	FOXJ3	42176539	42335877	forkhead box J3 [Sou...	no	no	no	no
ENSG00000227527	661	1	1	0	0	100	1		42335386	42338376	novel transcript	no	no	no	no
ENSG00000177181	10638	1680	1688	8	0	99.5261	1	RIMKLA	42380792	42424232	ribosomal modificati...	no	no	no	no
ENSG00000235002	397	2	2	0	0	100	1		42412398	42412794	ribosomal protein S1...	no	no	no	no
ENSG00000066185	2181	28	28	0	0	100	1	ZMYND12	42430329	42456253	zinc finger MYND-typ...	no	no	no	no
ENSG00000127125	3412	1163	1167	4	0	99.6572	1	PPCS	42456117	42473385	phosphopantothenoylc...	no	no	no	no
ENSG00000186409	25206	78	78	0	0	100	1	CCDC30	42463221	42657190	coiled-coil domain c...	no	no	no	no
ENSG00000236180	421	1	1	0	0	100	1		42570970	42571390	novel pseudogene	no	no	no	no
ENSG00000171960	1446	942	959	17	1	98.2273	1	PPIH	42658335	42676758	peptidylprolyl isome...	no	no	no	no
ENSG00000285728	3315	302	302	0	0	100	1		42658687	42682207	novel transcript, an...	no	no	no	no
ENSG00000065978	3395	66902	67336	434	0	99.3555	1	YBX1	42682418	42703805	Y-box binding protei...	no	no	no	no
ENSG00000164007	3602	820	828	8	0	99.0338	1	CLDN19	42733093	42740254	claudin 19 [Source:H...	no	no	no	no
ENSG00000117385	6766	3041	3045	4	0	99.8686	1	P3H1	42746335	42767084	prolyl 3-hydroxylase...	no	no	no	no
ENSG00000164008	5286	217	217	0	0	100	1	C1orf50	42767245	42779491	chromosome 1 open re...	no	no	no	no
ENSG00000274386	4373	92	98	6	6	93.8776	1	TMEM269	42784991	42816619	transmembrane protei...	no	no	no	no
ENSG00000177868	1353	407	407	0	0	100	1	SVBP	42807052	42817397	small vasohibin bind...	no	no	no	no
ENSG00000164010	5720	240	244	4	1	98.3607	1	ERMAP	42817122	42844991	erythroblast membran...	no	no	no	no
ENSG00000228192	3776	39	39	0	0	100	1	ZNF691-DT	42832522	42846427	ZNF691 divergent tra...	no	no	no	no
ENSG00000164011	2036	717	721	4	0	99.4452	1	ZNF691	42846573	42852477	zinc finger protein ...	no	no	no	no
ENSG00000117394	6614	30490	30778	288	0	99.0643	1	SLC2A1	42925353	42958893	solute carrier famil...	no	no	no	no
ENSG00000284138	440	2	2	0	0	100	1	ATP6V0CP4	42952202	42952641	ATPase H+ transporti...	no	no	no	no
ENSG00000227533	4275	642	646	4	0	99.3808	1	SLC2A1-DT	42959049	42996814	SLC2A1 divergent tra...	no	no	no	no
ENSG00000283973	1097	39	39	0	0	100	1		42959065	42961864	novel transcript	no	no	no	no
ENSG00000207256	107	9	9	0	0	100	1	RNU6-880P	42991438	42991544	RNA, U6 small nuclea...	no	no	no	no
ENSG00000186973	843	98	98	0	0	100	1	FAM183A	43145153	43156396	family with sequence...	no	no	no	no
ENSG00000117395	3561	3543	3547	4	0	99.8872	1	EBNA1BP2	43164175	43270936	EBNA1 binding protei...	no	no	no	no
ENSG00000243710	5583	22	22	0	0	100	1	CFAP57	43172330	43254358	cilia and flagella a...	no	no	no	no
ENSG00000179178	2138	918	918	0	0	100	1	TMEM125	43269983	43274002	transmembrane protei...	no	no	no	no
ENSG00000253313	1522	484	484	0	0	100	1	C1orf210	43281877	43285617	chromosome 1 open re...	no	no	no	no
ENSG00000066056	6705	352	352	0	0	100	1	TIE1	43300982	43323108	tyrosine kinase with...	no	no	no	no
ENSG00000117400	3937	12	12	0	0	100	1	MPL	43337818	43354466	MPL proto-oncogene, ...	no	no	no	no
ENSG00000287113	557	8	8	0	0	100	1		43348288	43348844	novel transcript, an...	no	no	no	no
ENSG00000234694	661	22	22	0	0	100	1	CDC20-DT	43354684	43358676	CDC20 divergent tran...	no	no	no	no
ENSG00000117399	2012	10159	10237	78	0	99.2381	1	CDC20	43358981	43363203	cell division cycle ...	no	no	no	no
ENSG00000066322	2506	918	930	12	1	98.7097	1	ELOVL1	43363398	43368074	ELOVL fatty acid elo...	no	no	no	no
ENSG00000159479	2704	435	439	4	0	99.0888	1	MED8	43383917	43389808	mediator complex sub...	no	no	no	no
ENSG00000229431	731	10	10	0	0	100	1	MED8-AS1	43385113	43389155	MED8 antisense RNA 1...	no	no	no	no
ENSG00000198198	26354	1270	1274	4	0	99.686	1	SZT2	43389882	43454247	SZT2 subunit of KICS...	no	no	no	no
ENSG00000142949	10712	23516	23724	208	0	99.1233	1	PTPRF	43525187	43623666	protein tyrosine pho...	no	no	no	no
ENSG00000066135	5184	1556	1562	6	0	99.6159	1	KDM4A	43650149	43705518	lysine demethylase 4...	no	no	no	no
ENSG00000236200	4217	110	110	0	0	100	1	KDM4A-AS1	43685123	43708138	KDM4A antisense RNA ...	no	no	no	no
ENSG00000126091	19448	165	165	0	0	100	1	ST3GAL3	43705824	43931165	ST3 beta-galactoside...	no	no	no	no
ENSG00000224751	1312	4	4	0	0	100	1	SHMT1P1	43850300	43851611	SHMT1 pseudogene 1 [...	no	no	no	no
ENSG00000117407	2657	638	638	0	0	100	1	ARTN	43933320	43937240	artemin [Source:HGNC...	no	no	no	no
ENSG00000237950	2224	71	71	0	0	100	1	LINC02918	43937918	43940781	long intergenic non-...	no	no	no	no
ENSG00000288573	557	15	15	0	0	100	1		43944355	43946624	novel transcript	no	no	no	no
ENSG00000117408	5072	951	963	12	1	98.7539	1	IPO13	43946950	43968022	importin 13 [Source:...	no	no	no	no
ENSG00000285649	2044	3	3	0	0	100	1		43968351	43974821	novel transcript, an...	no	no	no	no
ENSG00000132768	2930	1853	1856	3	0	99.8384	1	DPH2	43970000	43973369	diphthamide biosynth...	no	no	no	no
ENSG00000117410	3239	2081	2109	28	1	98.6724	1	ATP6V0B	43974487	43978295	ATPase H+ transporti...	no	no	no	no
ENSG00000117411	3772	3651	3671	20	0	99.4552	1	B4GALT2	43978943	43991170	beta-1,4-galactosylt...	no	no	no	no
ENSG00000159214	3563	518	522	4	0	99.2337	1	CCDC24	43991359	43996528	coiled-coil domain c...	no	no	no	no
ENSG00000196517	5249	556	556	0	0	100	1	SLC6A9	43991500	44031467	solute carrier famil...	no	no	no	no
ENSG00000230615	10561	115	115	0	0	100	1		44030414	44115913	novel transcript	no	no	no	no
ENSG00000233514	360	3	3	0	0	100	1		44122153	44122512	small nuclear ribonu...	no	no	no	no
ENSG00000283039	3159	8	8	0	0	100	1	KLF18	44137821	44141631	KLF transcription fa...	no	no	no	no
ENSG00000271329	796	6	6	0	0	100	1		44187943	44189049	metaxin 3 (MTX3) pse...	no	no	no	no
ENSG00000178028	5599	1395	1395	0	0	100	1	DMAP1	44213455	44220681	DNA methyltransferas...	no	no	no	no
ENSG00000117419	2785	3128	3132	4	0	99.8723	1	ERI3	44221070	44355260	ERI1 exoribonuclease...	no	no	no	no
ENSG00000233602	619	23	23	0	0	100	1	ERI3-IT1	44243408	44244273	ERI3 intronic transc...	no	no	no	no
ENSG00000187147	9687	2990	3018	28	0	99.0722	1	RNF220	44405194	44651724	ring finger protein ...	no	no	no	no
ENSG00000126106	3561	150	150	0	0	100	1	TMEM53	44635238	44674481	transmembrane protei...	no	no	no	no
ENSG00000198520	3290	29	29	0	0	100	1	ARMH1	44674692	44725591	armadillo like helic...	no	no	no	no
ENSG00000199377	117	3	3	0	0	100	1	RNU5F-1	44721786	44721902	RNA, U5F small nucle...	no	no	no	no
ENSG00000142945	3646	6191	6199	8	0	99.8709	1	KIF2C	44739818	44767767	kinesin family membe...	no	no	no	no
ENSG00000225721	765	11	11	0	0	100	1		44759037	44775810	novel transcript	no	no	no	no
ENSG00000142937	2781	55408	55468	60	0	99.8918	1	RPS8	44775251	44778779	ribosomal protein S8...	no	no	no	no
ENSG00000200913	104	11	11	0	0	100	1	SNORD46	44776490	44776593	small nucleolar RNA,...	no	no	no	no
ENSG00000142959	2512	139	139	0	0	100	1	BEST4	44783585	44788170	bestrophin 4 [Source...	no	no	no	no
ENSG00000173846	3327	385	389	4	1	98.9717	1	PLK3	44800377	44805990	polo like kinase 3 [...	no	no	no	no
ENSG00000188396	1355	4	4	0	0	100	1	DYNLT4	44805893	44807351	dynein light chain T...	no	no	no	no
ENSG00000222009	3520	48	48	0	0	100	1	BTBD19	44808523	44815585	BTB domain containin...	no	no	no	no
ENSG00000117425	5334	41	41	0	0	100	1	PTCH2	44819844	44843253	patched 2 [Source:HG...	no	no	no	no
ENSG00000070785	3411	1288	1296	8	0	99.3827	1	EIF2B3	44850522	44986722	eukaryotic translati...	no	no	no	no
ENSG00000268949	3130	2	2	0	0	100	1	MRPS17P1	44988705	44991834	mitochondrial riboso...	no	no	no	no
ENSG00000126107	5072	1238	1246	8	0	99.3579	1	HECTD3	45002540	45011324	HECT domain E3 ubiqu...	no	no	no	no
ENSG00000126088	4029	2129	2149	20	0	99.0693	1	UROD	45010950	45015575	uroporphyrinogen dec...	no	no	no	no
ENSG00000162415	6095	379	379	0	0	100	1	ZSWIM5	45016399	45306209	zinc finger SWIM-typ...	no	no	no	no
ENSG00000281912	1710	12	12	0	0	100	1	LINC01144	45303910	45305619	long intergenic non-...	no	no	no	no
ENSG00000186603	1785	541	541	0	0	100	1	HPDL	45326895	45328710	4-hydroxyphenylpyruv...	no	no	no	no
ENSG00000132781	5811	70	70	0	0	100	1	MUTYH	45329163	45340893	mutY DNA glycosylase...	no	no	no	no
ENSG00000132773	2358	258	258	0	0	100	1	TOE1	45340052	45343973	target of EGR1, exon...	no	no	no	no
ENSG00000070759	3319	576	576	0	0	100	1	TESK2	45343883	45491163	testis associated ac...	no	no	no	no
ENSG00000280670	2757	305	305	0	0	100	1	CCDC163	45493866	45500079	CCDC163 homolog [Sou...	no	no	no	no
ENSG00000132763	5049	452	456	4	0	99.1228	1	MMACHC	45500300	45513382	metabolism of cobala...	no	no	no	no
ENSG00000117450	1504	24581	24589	8	0	99.9675	1	PRDX1	45510914	45542732	peroxiredoxin 1 [Sou...	no	no	no	no
ENSG00000117448	3121	6409	6465	56	0	99.1338	1	AKR1A1	45550543	45570049	aldo-keto reductase ...	no	no	no	no
ENSG00000281133	96	2	2	0	0	100	1		45580892	45580996		no	no	no	no
ENSG00000280836	99	8	8	0	0	100	1		45581219	45581321		no	no	no	no
ENSG00000132780	8304	45792	45967	175	0	99.6193	1	NASP	45583846	45618904	nuclear autoantigeni...	no	no	no	no
ENSG00000159588	3323	98	98	0	0	100	1	CCDC17	45620044	45624057	coiled-coil domain c...	no	no	no	no
ENSG00000159592	7433	6774	6786	12	0	99.8232	1	GPBP1L1	45627304	45688113	GC-rich promoter bin...	no	no	no	no
ENSG00000225447	382	31	31	0	0	100	1	RPS15AP10	45645816	45646197	ribosomal protein S1...	no	no	no	no
ENSG00000234329	788	22	22	0	0	100	1	RPL7AP16	45651039	45651826	ribosomal protein L7...	no	no	no	no
ENSG00000159596	1465	2072	2072	0	0	100	1	TMEM69	45688181	45694436	transmembrane protei...	no	no	no	no
ENSG00000197429	3708	376	376	0	0	100	1	IPP	45694324	45750653	intracisternal A par...	no	no	no	no
ENSG00000230896	598	12	12	0	0	100	1		45694684	45697075	novel transcript	no	no	no	no
ENSG00000086015	8062	2623	2688	65	2	97.5818	1	MAST2	45786987	46036122	microtubule associat...	no	no	no	no
ENSG00000117461	7397	348	388	40	10	89.6907	1	PIK3R3	46040140	46133036	phosphoinositide-3-k...	no	no	no	no
ENSG00000117472	2370	6	6	0	0	100	1	TSPAN1	46175073	46185962	tetraspanin 1 [Sourc...	no	no	no	no
ENSG00000085998	6189	2025	2025	0	0	100	1	POMGNT1	46188683	46220305	protein O-linked man...	no	no	no	no
ENSG00000171357	1849	136	136	0	0	100	1	LURAP1	46203334	46221256	leucine rich adaptor...	no	no	no	no
ENSG00000085999	4078	1716	1746	30	1	98.2818	1	RAD54L	46246461	46278480	RAD54 like [Source:H...	no	no	no	no
ENSG00000132128	8606	3306	3306	0	0	100	1	LRRC41	46261196	46303616	leucine rich repeat ...	no	no	no	no
ENSG00000173660	1341	9255	9263	8	0	99.9136	1	UQCRH	46303698	46316776	ubiquinol-cytochrome...	no	no	no	no
ENSG00000117481	8468	943	951	8	0	99.1588	1	NSUN4	46340789	46365152	NOP2/Sun RNA methylt...	no	no	no	no
ENSG00000117480	2724	291	291	0	0	100	1	FAAH	46394317	46413848	fatty acid amide hyd...	no	no	no	no
ENSG00000232022	2476	28	28	0	0	100	1	FAAHP1	46432129	46445321	fatty acid amide hyd...	no	no	no	no
ENSG00000224863	1764	4	4	0	0	100	1	LINC01398	46446600	46451317	long intergenic non-...	no	no	no	no
ENSG00000197587	5068	4	4	0	0	100	1	DMBX1	46489836	46516216	diencephalon/mesence...	no	no	no	no
ENSG00000269956	2530	17	17	0	0	100	1	MKNK1-AS1	46538611	46570255	MKNK1 antisense RNA ...	no	no	no	no
ENSG00000162456	2933	6	6	0	0	100	1	KNCN	46545641	46551647	kinocilin [Source:HG...	no	no	no	no
ENSG00000079277	8071	864	888	24	2	97.2973	1	MKNK1	46557407	46616843	MAPK interacting ser...	no	no	no	no
ENSG00000142961	5916	171	171	0	0	100	1	MOB3C	46607719	46616811	MOB kinase activator...	no	no	no	no
ENSG00000123472	5677	2600	2628	28	1	98.9346	1	ATPAF1	46632737	46673867	ATP synthase mitocho...	no	no	no	no
ENSG00000186118	1464	2	2	0	0	100	1	TEX38	46668855	46673594	testis expressed 38 ...	no	no	no	no
ENSG00000228237	584	1	1	0	0	100	1	EFCAB14-AS1	46674036	46692098	EFCAB14 antisense RN...	no	no	no	no
ENSG00000159658	16312	3658	3674	16	0	99.5645	1	EFCAB14	46674659	46719146	EF-hand calcium bind...	no	no	no	no
ENSG00000154198	1598	2	2	0	0	100	1	CYP4Z2P	46843178	46900434	cytochrome P450 fami...	no	no	no	no
ENSG00000261290	154	2	2	0	0	100	1	CYP4A44P	47002995	47003148	cytochrome P450 fami...	no	no	no	no
ENSG00000186377	2447	250	250	0	0	100	1	CYP4X1	47023669	47050751	cytochrome P450 fami...	no	no	no	no
ENSG00000186160	2252	2	2	0	0	100	1	CYP4Z1	47067231	47118318	cytochrome P450 fami...	no	no	no	no
ENSG00000225506	921	29	29	0	0	100	1	CYP4A22-AS1	47096653	47179271	CYP4A22 antisense RN...	no	no	no	no
ENSG00000162365	3853	5	5	0	0	100	1	CYP4A22	47137435	47149727	cytochrome P450 fami...	no	no	no	no
ENSG00000224805	661	4	4	0	0	100	1	LINC00853	47179250	47180339	long intergenic non-...	no	no	no	no
ENSG00000123473	7291	2305	2331	26	1	98.8846	1	STIL	47250139	47314892	STIL centriolar asse...	no	no	no	no
ENSG00000162368	3844	2658	2686	28	1	98.9576	1	CMPK1	47333790	47394866	cytidine/uridine mon...	no	no	no	no
ENSG00000225762	483	5	5	0	0	100	1	LINC01389	47380928	47408477	long intergenic non-...	no	no	no	no
ENSG00000237424	2509	2	2	0	0	100	1	FOXD2-AS1	47432133	47434641	FOXD2 adjacent oppos...	no	no	no	no
ENSG00000186564	2648	4	12	8	66	33.3333	1	FOXD2	47438044	47440691	forkhead box D2 [Sou...	no	no	no	no
ENSG00000227883	242	2	2	0	0	100	1	ATP6V0E1P4	47550196	47550753	ATPase H+ transporti...	no	no	no	no
ENSG00000227947	1461	4	4	0	0	100	1	LINC01738	47688463	47704029	long intergenic non-...	no	no	no	no
ENSG00000269113	7524	338	338	0	0	100	1	TRABD2B	47760528	47997385	TraB domain containi...	no	no	no	no
ENSG00000237180	267	4	4	0	0	100	1	CYP46A4P	48089368	48089634	cytochrome P450 fami...	no	no	no	no
ENSG00000242267	2010	8	8	0	0	100	1	SKINT1L	48161799	48179230	Skint1 like (pseudog...	no	no	no	no
ENSG00000223720	651	1	1	0	0	100	1		48172972	48206857	novel transcript	no	no	no	no
ENSG00000117834	4535	22	22	0	0	100	1	SLC5A9	48222685	48248644	solute carrier famil...	no	no	no	no
ENSG00000272491	1674	2	2	0	0	100	1		48227888	48229561	novel transcript, an...	no	no	no	no
ENSG00000132122	5938	696	700	4	0	99.4286	1	SPATA6	48295373	48472208	spermatogenesis asso...	no	no	no	no
ENSG00000186094	7504	8	8	0	0	100	1	AGBL4	48532854	50023954	AGBL carboxypeptidas...	no	no	no	no
ENSG00000162373	2142	270	270	0	0	100	1	BEND5	48727519	48776969	BEN domain containin...	no	no	no	no
ENSG00000162374	8368	66	66	0	0	100	1	ELAVL4	50024029	50203772	ELAV like RNA bindin...	no	no	no	no
ENSG00000229316	653	1	1	0	0	100	1	HMGB1P45	50398825	50399773	high mobility group ...	no	no	no	no
ENSG00000185104	7549	2614	2634	20	0	99.2407	1	FAF1	50437028	50960267	Fas associated facto...	no	no	no	no
ENSG00000225767	503	4	4	0	0	100	1	FAF1-AS1	50461469	50471150	FAF1 antisense RNA 1...	no	no	no	no
ENSG00000230585	811	4	4	0	0	100	1	PHB1P12	50780340	50781150	PHB1 pseudogene 12 [...	no	no	no	no
ENSG00000123091	3112	2524	2528	4	0	99.8418	1	RNF11	51236273	51273447	ring finger protein ...	no	no	no	no
ENSG00000233406	870	1	1	0	0	100	1		51250603	51251472	ribosomal protein S2...	no	no	no	no
ENSG00000236434	435	1	1	0	0	100	1		51264916	51266074	novel transcript	no	no	no	no
ENSG00000085831	9362	227	232	5	2	97.8448	1	TTC39A	51287258	51345116	tetratricopeptide re...	no	no	no	no
ENSG00000085832	7378	3081	3097	16	0	99.4834	1	EPS15	51354263	51519328	epidermal growth fac...	no	no	no	no
ENSG00000227070	476	2	2	0	0	100	1	EPS15-AS1	51518288	51561651	EPS15 antisense RNA ...	no	no	no	no
ENSG00000227742	2704	4	4	0	0	100	1	CALR4P	51561866	51594897	calreticulin 4, pseu...	no	no	no	no
ENSG00000117859	10273	4615	4621	6	0	99.8702	1	OSBPL9	51577179	51798427	oxysterol binding pr...	no	no	no	no
ENSG00000078618	6773	9834	9871	37	0	99.6252	1	NRDC	51789191	51878805	nardilysin convertas...	no	no	no	no
ENSG00000266993	1819	48	48	0	0	100	1		51793934	51799154	novel transcript, an...	no	no	no	no
ENSG00000169213	12780	5579	5597	18	0	99.6784	1	RAB3B	51907956	51990700	RAB3B, member RAS on...	no	no	no	no
ENSG00000117862	2864	259	261	2	0	99.2337	1	TXNDC12	52020131	52055191	thioredoxin domain c...	no	no	no	no
ENSG00000198841	1708	109	109	0	0	100	1	KTI12	52032103	52033810	KTI12 chromatin asso...	no	no	no	no
ENSG00000223390	762	1	1	0	0	100	1		52033391	52044279	novel transcript	no	no	no	no
ENSG00000228369	391	3	3	0	0	100	1	TXNDC12-AS1	52050918	52052683	TXNDC12 antisense RN...	no	no	no	no
ENSG00000134717	5948	6057	6173	116	1	98.1208	1	BTF3L4	52056199	52090716	basic transcription ...	no	no	no	no
ENSG00000157077	5809	1829	1829	0	0	100	1	ZFYVE9	52142089	52348671	zinc finger FYVE-typ...	no	no	no	no
ENSG00000228407	340	1	1	0	0	100	1		52160261	52160600	pseudogene similar t...	no	no	no	no
ENSG00000154222	7495	884	884	0	0	100	1	CC2D1B	52345723	52366205	coiled-coil and C2 d...	no	no	no	no
ENSG00000272100	391	7	7	0	0	100	1		52353487	52353877	novel transcript, an...	no	no	no	no
ENSG00000224680	568	4	4	0	0	100	1	PLA2G12AP1	52368677	52369244	phospholipase A2 gro...	no	no	no	no
ENSG00000085840	3121	2438	2438	0	0	100	1	ORC1	52372829	52404423	origin recognition c...	no	no	no	no
ENSG00000134748	5617	3833	3845	12	0	99.6879	1	PRPF38A	52404602	52420836	pre-mRNA processing ...	no	no	no	no
ENSG00000134744	16199	3587	3611	24	0	99.3354	1	TUT4	52408282	52553487	terminal uridylyl tr...	no	no	no	no
ENSG00000116157	1692	384	384	0	0	100	1	GPX7	52602371	52609051	glutathione peroxida...	no	no	no	no
ENSG00000182183	2684	16	16	0	0	100	1	SHISAL2A	52633168	52669683	shisa like 2A [Sourc...	no	no	no	no
ENSG00000162377	4148	1752	1760	8	0	99.5455	1	COA7	52684449	52698347	cytochrome c oxidase...	no	no	no	no
ENSG00000162378	8206	1429	1429	0	0	100	1	ZYG11B	52726453	52827336	zyg-11 family member...	no	no	no	no
ENSG00000203995	4694	32	32	0	0	100	1	ZYG11A	52842511	52894998	zyg-11 family member...	no	no	no	no
ENSG00000121310	11572	616	616	0	0	100	1	ECHDC2	52895910	52927212	enoyl-CoA hydratase ...	no	no	no	no
ENSG00000230953	175	12	12	0	0	100	1		52920422	52920596	translational machin...	no	no	no	no
ENSG00000116171	8253	2057	2061	4	0	99.8059	1	SCP2	52927276	53051698	sterol carrier prote...	no	no	no	no
ENSG00000236360	502	1	1	0	0	100	1	RRAS2P1	52993201	52993702	RRAS2 pseudogene 1 [...	no	no	no	no
ENSG00000174348	4899	6	6	0	0	100	1	PODN	53062052	53085501	podocan [Source:HGNC...	no	no	no	no
ENSG00000157184	10089	828	835	7	0	99.1617	1	CPT2	53196792	53214197	carnitine palmitoylt...	no	no	no	no
ENSG00000236723	1227	2	2	0	0	100	1		53209783	53213775	novel transcript, an...	no	no	no	no
ENSG00000162384	4504	1481	1481	0	0	100	1	CZIB	53214099	53220634	CXXC motif containin...	no	no	no	no
ENSG00000259818	3591	1	1	0	0	100	1	CZIB-DT	53220663	53224253	CZIB divergent trans...	no	no	no	no
ENSG00000162385	1363	1396	1396	0	0	100	1	MAGOH	53226900	53238518	mago homolog, exon j...	no	no	no	no
ENSG00000226754	1941	7	7	0	0	100	1	MAGOH-DT	53238550	53246482	MAGOH divergent tran...	no	no	no	no
ENSG00000157193	19668	6455	6493	38	0	99.4148	1	LRP8	53242364	53328469	LDL receptor related...	no	no	no	no
ENSG00000225675	567	30	30	0	0	100	1	LRP8-DT	53328233	53336509	LRP8 divergent trans...	no	no	no	no
ENSG00000236253	3164	12	12	0	0	100	1	SLC25A3P1	53413149	53440020	solute carrier famil...	no	no	no	no
ENSG00000143006	2440	10	10	0	0	100	1	DMRTB1	53459399	53467488	DMRT like family B w...	no	no	no	no
ENSG00000174332	3113	20	20	0	0	100	1	GLIS1	53506237	53739164	GLIS family zinc fin...	no	no	no	no
ENSG00000058804	4720	5675	5743	68	1	98.8159	1	NDC1	53765478	53838463	NDC1 transmembrane n...	no	no	no	no
ENSG00000058799	2036	854	854	0	0	100	1	YIPF1	53851719	53889798	Yip1 domain family m...	no	no	no	no
ENSG00000211452	2282	12	12	0	0	100	1	DIO1	53891239	53911086	iodothyronine deiodi...	no	no	no	no
ENSG00000081870	3236	1115	1119	4	0	99.6425	1	HSPB11	53916574	53945699	heat shock protein f...	no	no	no	no
ENSG00000116212	2164	2142	2160	18	0	99.1667	1	LRRC42	53946085	53968168	leucine rich repeat ...	no	no	no	no
ENSG00000219102	1063	4	4	0	0	100	1	HNRNPA3P12	53974969	53976031	heterogeneous nuclea...	no	no	no	no
ENSG00000116209	9149	4150	4154	4	0	99.9037	1	TMEM59	54026681	54053504	transmembrane protei...	no	no	no	no
ENSG00000280378	1755	25	25	0	0	100	1		54033126	54034880	TEC	no	no	no	no
ENSG00000116205	12168	1169	1177	8	0	99.3203	1	TCEANC2	54053584	54112519	transcription elonga...	no	no	no	no
ENSG00000256407	3952	8	8	0	0	100	1		54132686	54200073	novel transcript	no	no	no	no
ENSG00000280425	4969	3	3	0	0	100	1		54137746	54142980	novel transcript, an...	no	no	no	no
ENSG00000215883	8926	909	922	13	1	98.59	1	CYB5RL	54169651	54200036	cytochrome b5 reduct...	no	no	no	no
ENSG00000116221	2549	5332	5364	32	0	99.4034	1	MRPL37	54184041	54225464	mitochondrial riboso...	no	no	no	no
ENSG00000157216	5227	6250	6422	172	2	97.3217	1	SSBP3	54225432	54413479	single stranded DNA ...	no	no	no	no
ENSG00000198711	2624	88	88	0	0	100	1	SSBP3-AS1	54236440	54239063	SSBP3 antisense RNA ...	no	no	no	no
ENSG00000227453	963	1	1	0	0	100	1	HNRNPA1P63	54536796	54537758	heterogeneous nuclea...	no	no	no	no
ENSG00000162390	9768	224	228	4	1	98.2456	1	ACOT11	54542257	54639192	acyl-CoA thioesteras...	no	no	no	no
ENSG00000162391	2006	15	15	0	0	100	1	FAM151A	54609181	54623556	family with sequence...	no	no	no	no
ENSG00000184313	9088	17	17	0	0	100	1	MROH7	54641754	54710266	maestro heat like re...	no	no	no	no
ENSG00000271723	7090	1	1	0	0	100	1	MROH7-TTC4	54641786	54742308	MROH7-TTC4 readthrou...	no	no	no	no
ENSG00000243725	3488	28	28	0	0	100	1	TTC4	54715861	54742657	tetratricopeptide re...	no	no	no	no
ENSG00000162396	2356	552	552	0	0	100	1	PARS2	54756898	54764523	prolyl-tRNA syntheta...	no	no	no	no
ENSG00000006555	6111	92	92	0	0	100	1	TTC22	54779712	54801323	tetratricopeptide re...	no	no	no	no
ENSG00000237453	343	3	3	0	0	100	1		54792885	54794905	novel transcript, an...	no	no	no	no
ENSG00000162398	1777	27	27	0	0	100	1	LEXM	54806063	54842252	lymphocyte expansion...	no	no	no	no
ENSG00000116133	6214	18652	18691	39	0	99.7913	1	DHCR24	54849627	54887195	24-dehydrocholestero...	no	no	no	no
ENSG00000233203	765	5	5	0	0	100	1	DHCR24-DT	54887563	54888850	DHCR24 divergent tra...	no	no	no	no
ENSG00000284601	1733	2	2	0	0	100	1		54974900	54980464	novel transcript	no	no	no	no
ENSG00000143001	1256	3	3	0	0	100	1	TMEM61	54980628	54992288	transmembrane protei...	no	no	no	no
ENSG00000162399	9761	46	46	0	0	100	1	BSND	54998933	55017172	barttin CLCNK type a...	no	no	no	no
ENSG00000169174	5711	2252	2256	4	0	99.8227	1	PCSK9	55039447	55064852	proprotein convertas...	no	no	no	no
ENSG00000162402	12023	4834	4850	16	0	99.6701	1	USP24	55066359	55215378	ubiquitin specific p...	no	no	no	no
ENSG00000231090	2568	2	2	0	0	100	1	MIR4422HG	55217645	55324691	MIR4422 host gene [S...	no	no	no	no
ENSG00000260971	7878	6	6	0	0	100	1		56154545	56477687	novel transcript	no	no	no	no
ENSG00000223956	2203	4	4	0	0	100	1	LINC01767	56414918	56417137	long intergenic non-...	no	no	no	no
ENSG00000162407	5272	988	996	8	0	99.1968	1	PLPP3	56494761	56645301	phospholipid phospha...	no	no	no	no
ENSG00000236776	460	2	2	0	0	100	1	RPL21P23	56538452	56538911	ribosomal protein L2...	no	no	no	no
ENSG00000162409	9362	1716	1720	4	0	99.7674	1	PRKAA2	56645314	56715335	protein kinase AMP-a...	no	no	no	no
ENSG00000187889	4648	18	18	0	0	100	1	FYB2	56718789	56819696	FYN binding protein ...	no	no	no	no
ENSG00000157131	2367	2	2	0	0	100	1	C8A	56854768	56918223	complement C8 alpha ...	no	no	no	no
ENSG00000173406	7548	652	656	4	0	99.3902	1	DAB1	56994778	58546734	DAB adaptor protein ...	no	no	no	no
ENSG00000227935	708	7	7	0	0	100	1		57386576	57387450	novel transcript	no	no	no	no
ENSG00000162600	3718	456	462	6	1	98.7013	1	OMA1	58415384	58546802	OMA1 zinc metallopep...	no	no	no	no
ENSG00000286918	1791	17	17	0	0	100	1		58546168	58563897	novel transcript, an...	no	no	no	no
ENSG00000184292	1820	52	52	0	0	100	1	TACSTD2	58575433	58577252	tumor associated cal...	no	no	no	no
ENSG00000162601	13115	9718	9938	220	2	97.7863	1	MYSM1	58643440	58700090	Myb like, SWIRM and ...	no	no	no	no
ENSG00000177606	3257	990	1002	12	1	98.8024	1	JUN	58776845	58784048	Jun proto-oncogene, ...	no	no	no	no
ENSG00000234807	5017	38	38	0	0	100	1	LINC01135	58784384	58901109	long intergenic non-...	no	no	no	no
ENSG00000272226	535	2	2	0	0	100	1		58812808	58813342	novel transcript	no	no	no	no
ENSG00000232453	2068	8	8	0	0	100	1	LINC02777	58882868	58931897	long intergenic non-...	no	no	no	no
ENSG00000237352	8462	3	3	0	0	100	1	LINC01358	58933643	59240555	long intergenic non-...	no	no	no	no
ENSG00000241042	171	12	12	0	0	100	1		59054397	59056049	novel transcript	no	no	no	no
ENSG00000235215	317	12	12	0	0	100	1		59055999	59078116	novel transcript	no	no	no	no
ENSG00000224609	7581	32	32	0	0	100	1	FGGY-DT	59131932	59296491	FGGY divergent trans...	no	no	no	no
ENSG00000172456	12174	360	360	0	0	100	1	FGGY	59296638	59810647	FGGY carbohydrate ki...	no	no	no	no
ENSG00000226883	767	2	2	0	0	100	1		59754747	59789182	novel transcript	no	no	no	no
ENSG00000134709	6614	3642	3642	0	0	100	1	HOOK1	59814786	59876322	hook microtubule tet...	no	no	no	no
ENSG00000134716	2973	71	71	0	0	100	1	CYP2J2	59893308	59926773	cytochrome P450 fami...	no	no	no	no
ENSG00000162598	4422	8	8	0	0	100	1	C1orf87	59987269	60073770	chromosome 1 open re...	no	no	no	no
ENSG00000226476	15496	29	29	0	0	100	1	LINC01748	60515716	60640507	long intergenic non-...	no	no	no	no
ENSG00000231252	4298	2	2	0	0	100	1		60659631	60868009	novel transcript	no	no	no	no
ENSG00000162599	55886	101	101	0	0	100	1	NFIA	60865259	61462788	nuclear factor I A [...	no	no	no	no
ENSG00000284808	2442	3	3	0	0	100	1		61481087	61533271	novel transcript	no	no	no	no
ENSG00000162604	5516	730	730	0	0	100	1	TM2D1	61681046	61725423	TM2 domain containin...	no	no	no	no
ENSG00000271200	427	9	9	0	0	100	1	PATJ-DT	61741998	61742424	PATJ divergent trans...	no	no	no	no
ENSG00000132849	11919	2799	2811	12	0	99.5731	1	PATJ	61742477	62178675	PATJ crumbs cell pol...	no	no	no	no
ENSG00000242860	294	5	5	0	0	100	1	RN7SL180P	62072448	62072741	RNA, 7SL, cytoplasmi...	no	no	no	no
ENSG00000240563	3831	25382	25433	51	0	99.7995	1	L1TD1	62194849	62212328	LINE1 type transposa...	no	no	no	no
ENSG00000237227	307	72	79	7	8	91.1392	1		62208136	62208442	ribosomal protein L3...	no	no	no	no
ENSG00000132854	6814	26	30	4	13	86.6667	1	KANK4	62236165	62319434	KN motif and ankyrin...	no	no	no	no
ENSG00000162607	3869	3406	3422	16	0	99.5324	1	USP1	62436297	62451804	ubiquitin specific p...	no	no	no	no
ENSG00000116641	24890	2332	2344	12	0	99.4881	1	DOCK7	62454298	62688386	dedicator of cytokin...	no	no	no	no
ENSG00000132855	3371	7	7	0	0	100	1	ANGPTL3	62597520	62606313	angiopoietin like 3 ...	no	no	no	no
ENSG00000235545	1228	41	41	0	0	100	1	DOCK7-DT	62688482	62710694	DOCK7 divergent tran...	no	no	no	no
ENSG00000125703	3116	1107	1107	0	0	100	1	ATG4C	62784132	62865516	autophagy related 4C...	no	no	no	no
ENSG00000224209	7361	8	8	0	0	100	1	LINC00466	63159083	63317274	long intergenic non-...	no	no	no	no
ENSG00000230798	1208	3347	3351	4	0	99.8806	1	FOXD3-AS1	63320878	63324441	FOXD3 antisense RNA ...	no	no	no	no
ENSG00000187140	2562	642	642	0	0	100	1	FOXD3	63322567	63325128	forkhead box D3 [Sou...	no	no	no	no
ENSG00000236674	1357	7	7	0	0	100	1		63359823	63361179	DnaJ (Hsp40) homolog...	no	no	no	no
ENSG00000088035	5487	1196	1196	0	0	100	1	ALG6	63367575	63438553	ALG6 alpha-1,3-gluco...	no	no	no	no
ENSG00000142856	5459	2055	2067	12	0	99.4194	1	ITGB3BP	63440770	63593721	integrin subunit bet...	no	no	no	no
ENSG00000286429	1206	12	12	0	0	100	1		63487957	63508204	novel transcript, an...	no	no	no	no
ENSG00000203965	5704	372	372	0	0	100	1	EFCAB7	63523372	63572693	EF-hand calcium bind...	no	no	no	no
ENSG00000251720	60	1	1	0	0	100	1	RNU7-123P	63536711	63536770	RNA, U7 small nuclea...	no	no	no	no
ENSG00000116652	3555	48	48	0	0	100	1	DLEU2L	63547082	63550636	deleted in lymphocyt...	no	no	no	no
ENSG00000079739	4077	3200	3222	22	0	99.3172	1	PGM1	63593411	63660245	phosphoglucomutase 1...	no	no	no	no
ENSG00000244256	305	20	20	0	0	100	1	RN7SL130P	63655743	63656047	RNA, 7SL, cytoplasmi...	no	no	no	no
ENSG00000185483	6720	4798	4818	20	0	99.5849	1	ROR1	63774017	64181498	receptor tyrosine ki...	no	no	no	no
ENSG00000284928	1031	2	2	0	0	100	1		64186791	64192685	novel transcript	no	no	no	no
ENSG00000158966	7022	2208	2212	4	0	99.8192	1	CACHD1	64470129	64693058	cache domain contain...	no	no	no	no
ENSG00000162437	6070	2139	2155	16	0	99.2575	1	RAVER2	64745075	64833232	ribonucleoprotein, P...	no	no	no	no
ENSG00000162434	12620	3395	3447	52	1	98.4914	1	JAK1	64833223	65067754	Janus kinase 1 [Sour...	no	no	no	no
ENSG00000226891	7863	112	112	0	0	100	1	LINC01359	64972225	65002489	long intergenic non-...	no	no	no	no
ENSG00000185031	1480	28	28	0	0	100	1	SLC2A3P2	64984608	64986087	solute carrier famil...	no	no	no	no
ENSG00000272506	618	6	6	0	0	100	1		65003470	65004087	novel transcript	no	no	no	no
ENSG00000212257	107	2	2	0	0	100	1	RNU6-1176P	65022968	65023074	RNA, U6 small nuclea...	no	no	no	no
ENSG00000265996	88	28	28	0	0	100	1	MIR3671	65057755	65057842	microRNA 3671 [Sourc...	no	no	no	no
ENSG00000162433	7578	8657	9875	1218	12	87.6658	1	AK4	65147549	65232145	adenylate kinase 4 [...	no	no	no	no
ENSG00000231622	171	1	1	0	0	100	1	RPS29P7	65154480	65154650	ribosomal protein S2...	no	no	no	no
ENSG00000116675	6958	596	600	4	0	99.3333	1	DNAJC6	65248219	65415871	DnaJ heat shock prot...	no	no	no	no
ENSG00000213625	5237	1355	1359	4	0	99.7057	1	LEPROT	65420587	65436007	leptin receptor over...	no	no	no	no
ENSG00000116678	11370	856	856	0	0	100	1	LEPR	65420652	65641559	leptin receptor [Sou...	no	no	no	no
ENSG00000184588	8930	169	169	0	0	100	1	PDE4B	65792514	66374579	phosphodiesterase 4B...	no	no	no	no
ENSG00000118473	13320	45	45	0	0	100	1	SGIP1	66533267	66751139	SH3GL interacting en...	no	no	no	no
ENSG00000248458	1156	6	6	0	0	100	1		66665864	66677027	novel transcript, an...	no	no	no	no
ENSG00000152760	3360	103	103	0	0	100	1	DYNLT5	66752459	66779047	dynein light chain T...	no	no	no	no
ENSG00000152763	6673	51	51	0	0	100	1	DNAI4	66812885	66924856	dynein axonemal inte...	no	no	no	no
ENSG00000198160	8273	1958	1960	2	0	99.898	1	MIER1	66924895	66988619	MIER1 transcriptiona...	no	no	no	no
ENSG00000116704	6193	339	347	8	2	97.6945	1	SLC35D1	66999350	67054148	solute carrier famil...	no	no	no	no
ENSG00000203963	5022	1	1	0	0	100	1	C1orf141	67092165	67231853	chromosome 1 open re...	no	no	no	no
ENSG00000081985	6067	96	96	0	0	100	1	IL12RB2	67307364	67398724	interleukin 12 recep...	no	no	no	no
ENSG00000142864	7676	47273	47615	342	0	99.2817	1	SERBP1	67407810	67430415	SERPINE1 mRNA bindin...	no	no	no	no
ENSG00000223263	105	9	9	0	0	100	1	RNU6-387P	67417214	67417318	RNA, U6 small nuclea...	no	no	no	no
ENSG00000116717	1925	1154	1154	0	0	100	1	GADD45A	67685201	67688334	growth arrest and DN...	no	no	no	no
ENSG00000172380	4715	2803	2837	34	1	98.8016	1	GNG12	67701475	67833467	G protein subunit ga...	no	no	no	no
ENSG00000232284	3465	8	8	0	0	100	1	GNG12-AS1	67832293	68202987	GNG12, DIRAS3 and WL...	no	no	no	no
ENSG00000235055	904	2	2	0	0	100	1		68043330	68044233	sirtuin (silent mati...	no	no	no	no
ENSG00000228431	386	2	2	0	0	100	1	ARL5AP3	68049360	68049745	ARL5A pseudogene 3 [...	no	no	no	no
ENSG00000116729	4459	146	146	0	0	100	1	WLS	68098473	68233120	Wnt ligand secretion...	no	no	no	no
ENSG00000229133	582	1	1	0	0	100	1	RPS7P4	68242474	68243055	ribosomal protein S7...	no	no	no	no
ENSG00000024526	5904	4147	4157	10	0	99.7594	1	DEPDC1	68474152	68497221	DEP domain containin...	no	no	no	no
ENSG00000233589	960	85	85	0	0	100	1		68479129	68483539	novel transcript	no	no	no	no
ENSG00000234264	1247	15	15	0	0	100	1	DEPDC1-AS1	68496676	68538627	DEPDC1 antisense RNA...	no	no	no	no
ENSG00000285041	2636	1	1	0	0	100	1		68633701	68640425	novel transcript	no	no	no	no
ENSG00000285407	2810	27	27	0	0	100	1		68679202	68943452	novel transcript	no	no	no	no
ENSG00000285473	716	3	3	0	0	100	1		68974010	69023558	novel transcript	no	no	no	no
ENSG00000287453	549	4	4	0	0	100	1		69551848	69563715	novel transcript	no	no	no	no
ENSG00000033122	30043	167	167	0	0	100	1	LRRC7	69567922	70151945	leucine rich repeat ...	no	no	no	no
ENSG00000066557	2843	2855	2863	8	0	99.7206	1	LRRC40	70144805	70205579	leucine rich repeat ...	no	no	no	no
ENSG00000116754	8473	17400	17432	32	0	99.8164	1	SRSF11	70205682	70253052	serine and arginine ...	no	no	no	no
ENSG00000228988	457	1	1	0	0	100	1		70218589	70221023	novel transcript	no	no	no	no
ENSG00000118454	6184	1563	1567	4	0	99.7447	1	ANKRD13C	70258999	70354734	ankyrin repeat domai...	no	no	no	no
ENSG00000197568	1222	376	380	4	1	98.9474	1	HHLA3	70354786	70385339	HERV-H LTR-associati...	no	no	no	no
ENSG00000226088	575	13	13	0	0	100	1	HHLA3-AS1	70359562	70360437	HHLA3 antisense RNA ...	no	no	no	no
ENSG00000116761	2414	955	955	0	0	100	1	CTH	70411218	70439851	cystathionine gamma-...	no	no	no	no
ENSG00000271992	466	26	26	0	0	100	1		70445071	70445536	novel transcript	no	no	no	no
ENSG00000229051	2455	1	1	0	0	100	1	LINC01788	70706441	70786468	long intergenic non-...	no	no	no	no
ENSG00000050628	9653	60	60	0	0	100	1	PTGER3	70852353	71047816	prostaglandin E rece...	no	no	no	no
ENSG00000235079	967	5	5	0	0	100	1	ZRANB2-AS1	71048855	71067184	ZRANB2 antisense RNA...	no	no	no	no
ENSG00000132485	4985	7690	7710	20	0	99.7406	1	ZRANB2	71063291	71081289	zinc finger RANBP2-t...	no	no	no	no
ENSG00000207721	86	47	49	2	4	95.9184	1	MIR186	71067631	71067716	microRNA 186 [Source...	no	no	no	no
ENSG00000229956	14877	16	16	0	0	100	1	ZRANB2-DT	71081324	71489976	ZRANB2 divergent tra...	no	no	no	no
ENSG00000172260	13208	267	267	0	0	100	1	NEGR1	71395943	72282539	neuronal growth regu...	no	no	no	no
ENSG00000233994	608	4	4	0	0	100	1	GDI2P2	72274552	72275159	GDP dissociation inh...	no	no	no	no
ENSG00000286863	6418	36	36	0	0	100	1		72283170	72753772	novel transcript	no	no	no	no
ENSG00000225087	2896	12	12	0	0	100	1		72636547	72899240	novel transcript	no	no	no	no
ENSG00000227016	1382	4	4	0	0	100	1	LINC02796	72765031	72791282	long intergenic non-...	no	no	no	no
ENSG00000285808	1065	2	2	0	0	100	1	LINC02797	72793104	72854475	long intergenic non-...	no	no	no	no
ENSG00000162620	8759	33	33	0	0	100	1	LRRIQ3	74026015	74198187	leucine rich repeats...	no	no	no	no
ENSG00000254685	4180	173	173	0	0	100	1	FPGT	74198238	74234086	fucose-1-phosphate g...	no	no	no	no
ENSG00000259030	9896	54	54	0	0	100	1	FPGT-TNNI3K	74198235	74544393	FPGT-TNNI3K readthro...	no	no	no	no
ENSG00000116783	4733	2	2	0	0	100	1	TNNI3K	74235387	74544428	TNNI3 interacting ki...	no	no	no	no
ENSG00000237324	1408	5	5	0	0	100	1		74341579	74378802	novel transcript	no	no	no	no
ENSG00000178965	8827	2	2	0	0	100	1	ERICH3	74568117	74673792	glutamate rich 3 [So...	no	no	no	no
ENSG00000272864	565	4	4	0	0	100	1		74698769	74699333	novel transcript	no	no	no	no
ENSG00000116791	4085	1644	1648	4	0	99.7573	1	CRYZ	74705482	74733408	crystallin zeta [Sou...	no	no	no	no
ENSG00000162623	4616	1841	1845	4	0	99.7832	1	TYW3	74733152	74766678	tRNA-yW synthesizing...	no	no	no	no
ENSG00000162624	3977	70	70	0	0	100	1	LHX8	75128434	75161533	LIM homeobox 8 [Sour...	no	no	no	no
ENSG00000224149	2203	2	2	0	0	100	1		75129974	75132576	novel transcript, an...	no	no	no	no
ENSG00000137968	6299	705	705	0	0	100	1	SLC44A5	75202129	75611114	solute carrier famil...	no	no	no	no
ENSG00000117054	4783	1902	1906	4	0	99.7901	1	ACADM	75724431	75787575	acyl-CoA dehydrogena...	no	no	no	no
ENSG00000181227	1354	11	11	0	0	100	1	DLSTP1	75743423	75744776	dihydrolipoamide S-s...	no	no	no	no
ENSG00000137955	5920	4974	4978	4	0	99.9196	1	RABGGTB	75786197	75795086	Rab geranylgeranyltr...	no	no	no	no
ENSG00000057468	3270	11	11	0	0	100	1	MSH4	75796882	75913242	mutS homolog 4 [Sour...	no	no	no	no
ENSG00000184005	7212	1437	1469	32	2	97.8216	1	ST6GALNAC3	76074746	76634603	ST6 N-acetylgalactos...	no	no	no	no
ENSG00000272855	463	12	12	0	0	100	1		76636877	76637339	novel transcript	no	no	no	no
ENSG00000226415	750	29	33	4	12	87.8788	1	TPI1P1	76699789	76700538	triosephosphate isom...	no	no	no	no
ENSG00000117069	6059	378	406	28	6	93.1034	1	ST6GALNAC5	76867480	77067546	ST6 N-acetylgalactos...	no	no	no	no
ENSG00000288543	497	6	6	0	0	100	1		77067920	77078482	novel transcript	no	no	no	no
ENSG00000230498	2086	26	26	0	0	100	1		77081984	77086402	novel transcript	no	no	no	no
ENSG00000142892	5514	1435	1439	4	0	99.722	1	PIGK	77088989	77219430	phosphatidylinositol...	no	no	no	no
ENSG00000226084	555	95	1087	992	91	8.73965	1		77129114	77129668	ribosomal protein L1...	no	no	no	no
ENSG00000287870	1211	4	4	0	0	100	1		77248633	77250826	novel transcript	no	no	no	no
ENSG00000154027	6948	418	418	0	0	100	1	AK5	77282019	77559966	adenylate kinase 5 [...	no	no	no	no
ENSG00000036549	9008	3127	3131	4	0	99.8722	1	ZZZ3	77562416	77683419	zinc finger ZZ-type ...	no	no	no	no
ENSG00000077254	6918	4619	4635	16	0	99.6548	1	USP33	77695987	77759852	ubiquitin specific p...	no	no	no	no
ENSG00000180488	10128	1045	1045	0	0	100	1	MIGA1	77779624	77879540	mitoguardin 1 [Sourc...	no	no	no	no
ENSG00000219201	921	30	81	51	62	37.037	1		77810861	77811781	novel pseudogene	no	no	no	no
ENSG00000235613	1693	5	5	0	0	100	1	NSRP1P1	77847110	77848802	nuclear speckle spli...	no	no	no	no
ENSG00000232015	251	1	1	0	0	100	1	HSPE1P25	77853355	77853893	heat shock protein f...	no	no	no	no
ENSG00000235927	2292	25	25	0	0	100	1	NEXN-AS1	77881348	77889539	NEXN antisense RNA 1...	no	no	no	no
ENSG00000162614	4436	300	308	8	2	97.4026	1	NEXN	77888513	77943895	nexilin F-actin bind...	no	no	no	no
ENSG00000162613	7559	20203	20245	42	0	99.7925	1	FUBP1	77944055	77979110	far upstream element...	no	no	no	no
ENSG00000162616	3702	701	723	22	3	96.9571	1	DNAJB4	77979175	78017964	DnaJ heat shock prot...	no	no	no	no
ENSG00000137960	3904	72	76	4	5	94.7368	1	GIPC2	77979542	78138444	GIPC PDZ domain cont...	no	no	no	no
ENSG00000273338	209	32	32	0	0	100	1		78004346	78004554	novel transcript, an...	no	no	no	no
ENSG00000285928	1795	4	4	0	0	100	1		78022565	78024861	novel transcript	no	no	no	no
ENSG00000237413	2481	4	4	0	0	100	1		78229599	78369464	uncharacterized MGC2...	no	no	no	no
ENSG00000122420	5764	6	6	0	0	100	1	PTGFR	78303884	78540701	prostaglandin F rece...	no	no	no	no
ENSG00000227556	107	1	1	0	0	100	1		78317157	78317263	pseudogene fragment ...	no	no	no	no
ENSG00000162618	5798	56	56	0	0	100	1	ADGRL4	78889764	79282124	adhesion G protein-c...	no	no	no	no
ENSG00000285462	1507	2	2	0	0	100	1	LINC02792	79325008	79346445	long intergenic non-...	no	no	no	no
ENSG00000232676	1124	1	1	0	0	100	1	ADH5P2	79521080	79522203	ADH5 pseudogene 2 [S...	no	no	no	no
ENSG00000223026	308	1	1	0	0	100	1	RN7SKP247	81251789	81252096	RN7SK pseudogene 247...	no	no	no	no
ENSG00000117114	22649	6027	6027	0	0	100	1	ADGRL2	81306147	81993932	adhesion G protein-c...	no	no	no	no
ENSG00000224494	1150	2	2	0	0	100	1	HNRNPA3P14	81426456	81427605	heterogeneous nuclea...	no	no	no	no
ENSG00000233290	7213	67	67	0	0	100	1		82212413	82848205	novel transcript	no	no	no	no
ENSG00000230817	2155	13	13	0	0	100	1	LINC01362	82903183	83166815	long intergenic non-...	no	no	no	no
ENSG00000236268	4746	11	11	0	0	100	1	LINC01361	82970820	82986208	long intergenic non-...	no	no	no	no
ENSG00000137941	10547	150	150	0	0	100	1	TTLL7	83865024	83999150	tubulin tyrosine lig...	no	no	no	no
ENSG00000271576	1601	318	318	0	0	100	1	PRKACB-DT	84076331	84077961	PRKACB divergent tra...	no	no	no	no
ENSG00000142875	6730	1454	1454	0	0	100	1	PRKACB	84078062	84238498	protein kinase cAMP-...	no	no	no	no
ENSG00000203943	3405	73	73	0	0	100	1	SAMD13	84298366	84389957	sterile alpha motif ...	no	no	no	no
ENSG00000240520	2412	1	1	0	0	100	1	UOX	84363706	84397831	urate oxidase (pseud...	no	no	no	no
ENSG00000137976	1476	4	4	0	0	100	1	DNASE2B	84398484	84415018	deoxyribonuclease 2 ...	no	no	no	no
ENSG00000285361	1318	1	1	0	0	100	1		84477039	84479157	novel transcript	no	no	no	no
ENSG00000117133	2290	1807	1807	0	0	100	1	RPF1	84479259	84498352	ribosome production ...	no	no	no	no
ENSG00000174021	1128	320	320	0	0	100	1	GNG5	84498323	84506581	G protein subunit ga...	no	no	no	no
ENSG00000285851	2686	2	2	0	0	100	1		84498350	84556688	novel transcript	no	no	no	no
ENSG00000122432	4280	24	24	0	0	100	1	SPATA1	84506300	84567379	spermatogenesis asso...	no	no	no	no
ENSG00000117151	6934	81	81	0	0	100	1	CTBS	84549611	84574480	chitobiase [Source:H...	no	no	no	no
ENSG00000284882	1183	2	2	0	0	100	1		84574114	84583620	novel transcript	no	no	no	no
ENSG00000117155	8639	1490	1494	4	0	99.7323	1	SSX2IP	84643706	84690803	SSX family member 2 ...	no	no	no	no
ENSG00000171517	3536	837	853	16	1	98.1243	1	LPAR3	84811602	84893206	lysophosphatidic aci...	no	no	no	no
ENSG00000153898	3442	335	343	8	2	97.6676	1	MCOLN2	84925583	84997113	mucolipin TRP cation...	no	no	no	no
ENSG00000162643	3923	43	43	0	0	100	1	DNAI3	84999147	85133138	dynein axonemal inte...	no	no	no	no
ENSG00000055732	6624	77	85	8	9	90.5882	1	MCOLN3	85018082	85048500	mucolipin TRP cation...	no	no	no	no
ENSG00000280099	1717	52	52	0	0	100	1		85152487	85154203	TEC	no	no	no	no
ENSG00000097096	6405	557	557	0	0	100	1	SYDE2	85156889	85201724	synapse defective Rh...	no	no	no	no
ENSG00000162642	3420	1356	1356	0	0	100	1	C1orf52	85249953	85259672	chromosome 1 open re...	no	no	no	no
ENSG00000142867	4346	701	701	0	0	100	1	BCL10	85265776	85276632	BCL10 immune signali...	no	no	no	no
ENSG00000153904	4587	1509	1517	8	0	99.4726	1	DDAH1	85318481	85578363	dimethylarginine dim...	no	no	no	no
ENSG00000282057	3607	12	12	0	0	100	1		85482281	85578250	novel transcript	no	no	no	no
ENSG00000142871	3698	8119	8119	0	0	100	1	CCN1	85580761	85584589	cellular communicati...	no	no	no	no
ENSG00000117174	6203	1385	1385	0	0	100	1	ZNHIT6	85649417	85708433	zinc finger HIT-type...	no	no	no	no
ENSG00000171502	9568	176	176	0	0	100	1	COL24A1	85729233	86156943	collagen type XXIV a...	no	no	no	no
ENSG00000285210	2885	17	17	0	0	100	1	LINC02795	86288704	86320711	long intergenic non-...	no	no	no	no
ENSG00000122417	10898	2050	2082	32	1	98.463	1	ODF2L	86346824	86396342	outer dense fiber of...	no	no	no	no
ENSG00000231349	691	2	2	0	0	100	1		86404176	86404866	ribosomal protein L7...	no	no	no	no
ENSG00000016490	3310	4	4	0	0	100	1	CLCA1	86468368	86500259	chloride channel acc...	no	no	no	no
ENSG00000153923	3437	2	2	0	0	100	1	CLCA3P	86634276	86654745	chloride channel acc...	no	no	no	no
ENSG00000261737	961	9	9	0	0	100	1	CLCA4-AS1	86703502	86704462	lncRNA	no	no	no	no
ENSG00000097033	6881	2799	2807	8	0	99.715	1	SH3GLB1	86704570	86748184	SH3 domain containin...	no	no	no	no
ENSG00000183291	2201	4292	4316	24	0	99.4439	1	SELENOF	86862445	86914424	selenoprotein F [Sou...	no	no	no	no
ENSG00000153936	7426	2319	2347	28	1	98.807	1	HS2ST1	86914635	87109982	heparan sulfate 2-O-...	no	no	no	no
ENSG00000267272	6717	221	221	0	0	100	1	LINC01140	87129765	87169198	long intergenic non-...	no	no	no	no
ENSG00000143013	5421	3151	3181	30	0	99.0569	1	LMO4	87328880	87348923	LIM domain only 4 [S...	no	no	no	no
ENSG00000237505	16635	6	6	0	0	100	1	PKN2-AS1	87620803	88685204	PKN2 antisense RNA 1...	no	no	no	no
ENSG00000286758	599	2	2	0	0	100	1		88462936	88464079	novel transcript	no	no	no	no
ENSG00000274321	171	1	1	0	0	100	1		88520000	88520170		no	no	no	no
ENSG00000065243	6897	3501	3541	40	1	98.8704	1	PKN2	88684222	88836255	protein kinase N2 [S...	no	no	no	no
ENSG00000207234	107	2	2	0	0	100	1	RNU6-125P	88816779	88816885	RNA, U6 small nuclea...	no	no	no	no
ENSG00000241975	318	33	33	0	0	100	1	ELOCP19	88829102	88829419	elongin C pseudogene...	no	no	no	no
ENSG00000137947	2524	628	628	0	0	100	1	GTF2B	88852633	88891944	general transcriptio...	no	no	no	no
ENSG00000235308	475	9	9	0	0	100	1		88923370	88923844	novel pseudogene	no	no	no	no
ENSG00000137944	2196	2561	2581	20	0	99.2251	1	KYAT3	88935773	88992953	kynurenine aminotran...	no	no	no	no
ENSG00000213516	5087	723	725	2	0	99.7241	1	RBMXL1	88979456	88992960	RBMX like 1 [Source:...	no	no	no	no
ENSG00000234518	483	25	25	0	0	100	1	PTGES3P1	89104285	89104767	prostaglandin E synt...	no	no	no	no
ENSG00000154451	8143	2	2	0	0	100	1	GBP5	89256189	89272860	guanylate binding pr...	no	no	no	no
ENSG00000183347	4685	2	2	0	0	100	1	GBP6	89364059	89388160	guanylate binding pr...	no	no	no	no
ENSG00000225492	2352	1	1	0	0	100	1	GBP1P1	89410319	89426243	guanylate binding pr...	no	no	no	no
ENSG00000286548	6245	17	17	0	0	100	1		89427533	89525472	novel transcript, an...	no	no	no	no
ENSG00000197147	8270	1499	1499	0	0	100	1	LRRC8B	89524829	89597861	leucine rich repeat ...	no	no	no	no
ENSG00000231999	11975	55	55	0	0	100	1	LRRC8C-DT	89581291	89633003	LRRC8C divergent tra...	no	no	no	no
ENSG00000171488	11724	381	389	8	2	97.9434	1	LRRC8C	89633072	89769903	leucine rich repeat ...	no	no	no	no
ENSG00000272931	695	35	35	0	0	100	1	LRRC8D-DT	89820174	89820868	LRRC8D divergent tra...	no	no	no	no
ENSG00000171492	4852	2048	2064	16	0	99.2248	1	LRRC8D	89821014	89936611	leucine rich repeat ...	no	no	no	no
ENSG00000272672	547	2	2	0	0	100	1		89939601	89940147	novel transcript	no	no	no	no
ENSG00000228175	729	73	73	0	0	100	1	GEMIN8P4	89993593	89994321	gem nuclear organell...	no	no	no	no
ENSG00000162664	10988	3363	3391	28	0	99.1743	1	ZNF326	89995110	90035533	zinc finger protein ...	no	no	no	no
ENSG00000287406	968	64	64	0	0	100	1		90242088	90284188	novel transcript	no	no	no	no
ENSG00000212459	104	2	2	0	0	100	1	RNU6-695P	90253456	90253559	RNA, U6 small nuclea...	no	no	no	no
ENSG00000287372	4336	2	2	0	0	100	1		90388193	90420396	novel transcript	no	no	no	no
ENSG00000233593	14354	17	17	0	0	100	1	LINC02609	90769086	90851671	long intergenic non-...	no	no	no	no
ENSG00000225446	1842	3	3	0	0	100	1	LINC01763	90851122	90855253	long intergenic non-...	no	no	no	no
ENSG00000122482	7604	3312	3316	4	0	99.8794	1	ZNF644	90915298	91022272	zinc finger protein ...	no	no	no	no
ENSG00000162669	5814	159	159	0	0	100	1	HFM1	91260766	91404856	helicase for meiosis...	no	no	no	no
ENSG00000097046	3599	3824	3832	8	0	99.7912	1	CDC7	91500851	91525764	cell division cycle ...	no	no	no	no
ENSG00000241318	928	1	1	0	0	100	1	WDR82P2	91534666	91535593	WD repeat domain 82 ...	no	no	no	no
ENSG00000203914	1567	3	3	0	0	100	1	HSP90B3P	91642516	91644082	heat shock protein 9...	no	no	no	no
ENSG00000069702	8577	216	220	4	1	98.1818	1	TGFBR3	91680343	91906335	transforming growth ...	no	no	no	no
ENSG00000137948	4334	4	4	0	0	100	1	BRDT	91949343	92014426	bromodomain testis a...	no	no	no	no
ENSG00000172031	2250	49	53	4	7	92.4528	1	EPHX4	92029985	92063538	epoxide hydrolase 4 ...	no	no	no	no
ENSG00000230667	909	1	1	0	0	100	1	SETSIP	92074533	92075411	SET like protein [So...	no	no	no	no
ENSG00000189195	8342	456	456	0	0	100	1	BTBD8	92080305	92184725	BTB domain containin...	no	no	no	no
ENSG00000273487	1293	10	10	0	0	100	1		92189237	92190707	novel transcript	no	no	no	no
ENSG00000203910	1086	3	3	0	0	100	1	C1orf146	92217915	92245813	chromosome 1 open re...	no	no	no	no
ENSG00000174842	2910	1498	1508	10	0	99.3369	1	GLMN	92246402	92298987	glomulin, FKBP assoc...	no	no	no	no
ENSG00000122484	17048	1054	1063	9	0	99.1533	1	RPAP2	92299059	92402056	RNA polymerase II as...	no	no	no	no
ENSG00000162676	5069	8	8	0	0	100	1	GFI1	92473043	92486925	growth factor indepe...	no	no	no	no
ENSG00000067208	8276	628	636	8	1	98.7421	1	EVI5	92508696	92792404	ecotropic viral inte...	no	no	no	no
ENSG00000122406	3687	51836	51900	64	0	99.8767	1	RPL5	92832013	92841924	ribosomal protein L5...	no	no	no	no
ENSG00000154511	3091	388	393	5	1	98.7277	1	DIPK1A	92832737	92961522	divergent protein ki...	no	no	no	no
ENSG00000207523	133	16	16	0	0	100	1	SNORA66	92840719	92840851	small nucleolar RNA,...	no	no	no	no
ENSG00000229052	3403	4	4	0	0	100	1		92930696	92934098	GAJ protein pseudoge...	no	no	no	no
ENSG00000143033	5907	6197	6281	84	1	98.6626	1	MTF2	93079235	93139079	metal response eleme...	no	no	no	no
ENSG00000117500	9211	1507	1507	0	0	100	1	TMED5	93149742	93180516	transmembrane p24 tr...	no	no	no	no
ENSG00000122483	5633	1054	1064	10	0	99.0602	1	CCDC18	93179919	93278730	coiled-coil domain c...	no	no	no	no
ENSG00000237003	321	2	2	0	0	100	1	RPL36AP11	93190740	93191060	ribosomal protein L3...	no	no	no	no
ENSG00000225297	185	2	2	0	0	100	1		93199755	93199939	pseudogene similar t...	no	no	no	no
ENSG00000223745	6284	1102	1132	30	2	97.3498	1	CCDC18-AS1	93262186	93346025	CCDC18 antisense RNA...	no	no	no	no
ENSG00000229567	169	10	10	0	0	100	1		93278961	93279129	ribosomal protein L3...	no	no	no	no
ENSG00000117505	10925	3772	3812	40	1	98.9507	1	DR1	93345907	93369493	down-regulator of tr...	no	no	no	no
ENSG00000229635	512	10	10	0	0	100	1		93384487	93384998	pseudogene similar t...	no	no	no	no
ENSG00000137942	5798	9350	9374	24	0	99.744	1	FNBP1L	93448118	93554661	formin binding prote...	no	no	no	no
ENSG00000137936	6919	411	413	2	0	99.5157	1	BCAR3	93561741	93847150	BCAR3 adaptor protei...	no	no	no	no
ENSG00000224093	1954	8	8	0	0	100	1	BCAR3-AS1	93591966	93610605	BCAR3 antisense RNA ...	no	no	no	no
ENSG00000260464	1766	8	8	0	0	100	1		93847174	93848939	novel transcript	no	no	no	no
ENSG00000067334	7518	4002	4022	20	0	99.5027	1	DNTTIP2	93866284	93879918	deoxynucleotidyltran...	no	no	no	no
ENSG00000023909	5426	1099	1103	4	0	99.6374	1	GCLM	93885199	93909456	glutamate-cysteine l...	no	no	no	no
ENSG00000236689	677	2	2	0	0	100	1	MTCO2P21	93926615	93927569	MT-CO2 pseudogene 21...	no	no	no	no
ENSG00000198691	8547	2	2	0	0	100	1	ABCA4	93992834	94121148	ATP binding cassette...	no	no	no	no
ENSG00000137962	18370	681	689	8	1	98.8389	1	ARHGAP29	94148988	94275068	Rho GTPase activatin...	no	no	no	no
ENSG00000286692	486	3	3	0	0	100	1		94417743	94418228	novel transcript	no	no	no	no
ENSG00000117528	7655	1944	1956	12	0	99.3865	1	ABCD3	94418389	94518666	ATP binding cassette...	no	no	no	no
ENSG00000117525	2886	193	193	0	0	100	1	F3	94529173	94541759	coagulation factor I...	no	no	no	no
ENSG00000224081	10245	146	146	0	0	100	1	SLC44A3-AS1	94613814	94855426	SLC44A3 antisense RN...	no	no	no	no
ENSG00000263526	41	4	4	0	0	100	1	MIR378G	94745860	94745900	microRNA 378g [Sourc...	no	no	no	no
ENSG00000143036	2869	139	141	2	1	98.5816	1	SLC44A3	94820342	94895246	solute carrier famil...	no	no	no	no
ENSG00000117519	2783	8469	8509	40	0	99.5299	1	CNN3	94896949	94927223	calponin 3 [Source:H...	no	no	no	no
ENSG00000235501	2517	439	439	0	0	100	1	CNN3-DT	94927361	94963616	CNN3 divergent trans...	no	no	no	no
ENSG00000172339	9641	128	128	0	0	100	1	ALG14	94974405	95072951	ALG14 UDP-N-acetylgl...	no	no	no	no
ENSG00000152078	7385	369	369	0	0	100	1	TLCD4	95117355	95197607	TLC domain containin...	no	no	no	no
ENSG00000271092	1961	16	16	0	0	100	1	TLCD4-RWDD3	95117923	95247225	TLCD4-RWDD3 readthro...	no	no	no	no
ENSG00000122481	1927	120	120	0	0	100	1	RWDD3	95234210	95247225	RWD domain containin...	no	no	no	no
ENSG00000228852	1418	30	30	0	0	100	1		95243167	95278940	novel transcript, an...	no	no	no	no
ENSG00000228502	1389	4	653	649	99	0.612557	1	EEF1A1P11	96446930	96448318	eukaryotic translati...	no	no	no	no
ENSG00000137970	747	128	802	674	84	15.9601	1	RPL7P9	96678874	96679620	ribosomal protein L7...	no	no	no	no
ENSG00000117569	14681	2659	2667	8	0	99.7	1	PTBP2	96721665	96823738	polypyrimidine tract...	no	no	no	no
ENSG00000188641	7131	11	11	0	0	100	1	DPYD	97077743	97995000	dihydropyrimidine de...	no	no	no	no
ENSG00000228057	1258	3	3	0	0	100	1	SEC63P1	97545701	97546958	SEC63 homolog, prote...	no	no	no	no
ENSG00000162627	2067	914	930	16	1	98.2796	1	SNX7	98661701	98760500	sorting nexin 7 [Sou...	no	no	no	no
ENSG00000117598	4699	215	215	0	0	100	1	PLPPR5	98890245	99227929	phospholipid phospha...	no	no	no	no
ENSG00000117600	5540	186	186	0	0	100	1	PLPPR4	99264292	99309590	phospholipid phospha...	no	no	no	no
ENSG00000156869	8624	352	352	0	0	100	1	FRRS1	99703970	99766635	ferric chelate reduc...	no	no	no	no
ENSG00000162688	8157	1878	1878	0	0	100	1	AGL	99850361	99924023	amylo-alpha-1, 6-glu...	no	no	no	no
ENSG00000228084	655	4	4	0	0	100	1		99968382	99969957	novel transcript	no	no	no	no
ENSG00000117620	18235	924	928	4	0	99.569	1	SLC35A3	99969351	100035634	solute carrier famil...	no	no	no	no
ENSG00000156875	2945	80	80	0	0	100	1	MFSD14A	100038095	100083377	major facilitator su...	no	no	no	no
ENSG00000241073	384	1	1	0	0	100	1		100057990	100084471	novel transcript	no	no	no	no
ENSG00000156876	3972	1362	1368	6	0	99.5614	1	SASS6	100083563	100132955	SAS-6 centriolar ass...	no	no	no	no
ENSG00000226952	252	2	2	0	0	100	1		100099239	100099490	novel pseudogene	no	no	no	no
ENSG00000122435	4134	750	754	4	0	99.4695	1	TRMT13	100133150	100150496	tRNA methyltransfera...	no	no	no	no
ENSG00000122477	1992	80	80	0	0	100	1	LRRC39	100148448	100178273	leucine rich repeat ...	no	no	no	no
ENSG00000137992	11303	3458	3498	40	1	98.8565	1	DBT	100186919	100249834	dihydrolipoamide bra...	no	no	no	no
ENSG00000271415	236	1	1	0	0	100	1	RPL23AP90	100196816	100197051	ribosomal protein L2...	no	no	no	no
ENSG00000225169	378	5	5	0	0	100	1	BRI3P1	100213293	100213670	brain protein I3 pse...	no	no	no	no
ENSG00000285530	3788	4	4	0	0	100	1		100220488	100253414	novel transcript, an...	no	no	no	no
ENSG00000224616	10034	278	286	8	2	97.2028	1	RTCA-AS1	100251528	100266182	RTCA antisense RNA 1...	no	no	no	no
ENSG00000137996	3028	1663	1673	10	0	99.4023	1	RTCA	100266216	100292769	RNA 3'-terminal phos...	no	no	no	no
ENSG00000207750	68	2	2	0	0	100	1	MIR553	100281241	100281308	microRNA 553 [Source...	no	no	no	no
ENSG00000215871	814	4	4	0	0	100	1		100331804	100332617	novel pseudogene	no	no	no	no
ENSG00000223906	467	3	3	0	0	100	1		100344477	100345242	novel transcript	no	no	no	no
ENSG00000079335	6510	550	550	0	0	100	1	CDC14A	100345001	100520277	cell division cycle ...	no	no	no	no
ENSG00000234332	674	5	5	0	0	100	1	BCAS2P2	100393033	100394026	BCAS2 pseudogene 2 [...	no	no	no	no
ENSG00000181656	3492	4	4	0	0	100	1	GPR88	100538139	100542021	G protein-coupled re...	no	no	no	no
ENSG00000162694	4015	3075	3143	68	2	97.8365	1	EXTL2	100872372	100895179	exostosin like glyco...	no	no	no	no
ENSG00000273204	429	1	1	0	0	100	1		100894928	100895356	novel transcript, an...	no	no	no	no
ENSG00000162695	8600	1449	1457	8	0	99.4509	1	SLC30A7	100896076	100981757	solute carrier famil...	no	no	no	no
ENSG00000230946	979	3	3	0	0	100	1	HNRNPA1P68	100941017	100941995	heterogeneous nuclea...	no	no	no	no
ENSG00000117543	2970	2244	2252	8	0	99.6448	1	DPH5	100989623	101026088	diphthamide biosynth...	no	no	no	no
ENSG00000235795	671	19	19	0	0	100	1		100995473	100996260	novel transcript	no	no	no	no
ENSG00000233184	9868	241	245	4	1	98.3673	1	DPH5-DT	101025844	101090513	DPH5 divergent trans...	no	no	no	no
ENSG00000225938	403	4	4	0	0	100	1	S1PR1-DT	101234555	101236624	S1PR1 divergent tran...	no	no	no	no
ENSG00000170989	5223	68	68	0	0	100	1	S1PR1	101236865	101243713	sphingosine-1-phosph...	no	no	no	no
ENSG00000183298	880	10	70	60	85	14.2857	1	RPSAP19	101786340	101787219	ribosomal protein SA...	no	no	no	no
ENSG00000118733	4393	30	30	0	0	100	1	OLFM3	101802560	101996926	olfactomedin 3 [Sour...	no	no	no	no
ENSG00000060718	9091	1689	1689	0	0	100	1	COL11A1	102876467	103108872	collagen type XI alp...	no	no	no	no
ENSG00000224613	2774	4	4	0	0	100	1	RNPC3-DT	103415980	103525511	RNPC3 divergent tran...	no	no	no	no
ENSG00000185946	6867	1475	1522	47	3	96.912	1	RNPC3	103525691	103555239	RNA binding region (...	no	no	no	no
ENSG00000240038	7491	144	168	24	14	85.7143	1	AMY2B	103553815	103579534	amylase alpha 2B [So...	no	no	no	no
ENSG00000215869	3146	4	4	0	0	100	1		104072983	104226678	THAP domain containi...	no	no	no	no
ENSG00000237897	593	3	3	0	0	100	1		105890693	105891430	matrin 3 (MATR3) pse...	no	no	no	no
ENSG00000198890	4340	1260	1260	0	0	100	1	PRMT6	107056674	107067636	protein arginine met...	no	no	no	no
ENSG00000162631	9138	34	34	0	0	100	1	NTNG1	107140007	107484923	netrin G1 [Source:HG...	no	no	no	no
ENSG00000134215	7306	796	796	0	0	100	1	VAV3	107571161	107965180	vav guanine nucleoti...	no	no	no	no
ENSG00000085491	6726	1888	1892	4	0	99.7886	1	SLC25A24	108134043	108200849	solute carrier famil...	no	no	no	no
ENSG00000280186	2331	2	2	0	0	100	1		108200413	108202743	TEC	no	no	no	no
ENSG00000241361	1882	4	4	0	0	100	1	SLC25A24P1	108273139	108337387	SLC25A24 pseudogene ...	no	no	no	no
ENSG00000162636	9350	2304	2308	4	0	99.8267	1	FAM102B	108560089	108644900	family with sequence...	no	no	no	no
ENSG00000162639	2426	146	146	0	0	100	1	HENMT1	108648290	108661526	HEN methyltransferas...	no	no	no	no
ENSG00000285923	946	9	9	0	0	100	1		108661533	108666246	Novel transcript	no	no	no	no
ENSG00000134186	6955	6316	6350	34	0	99.4646	1	PRPF38B	108692310	108702928	pre-mRNA processing ...	no	no	no	no
ENSG00000143107	3090	10	10	0	0	100	1	FNDC7	108712908	108742749	fibronectin type III...	no	no	no	no
ENSG00000116266	5892	1940	1940	0	0	100	1	STXBP3	108746674	108809523	syntaxin binding pro...	no	no	no	no
ENSG00000162641	5039	4	4	0	0	100	1	AKNAD1	108815898	108963484	AKNA domain containi...	no	no	no	no
ENSG00000121957	19578	1110	1378	268	19	80.5515	1	GPSM2	108875350	108934545	G protein signaling ...	no	no	no	no
ENSG00000121940	10933	1196	1199	3	0	99.7498	1	CLCC1	108881885	108963527	chloride channel CLI...	no	no	no	no
ENSG00000085433	4423	301	301	0	0	100	1	WDR47	108970214	109042113	WD repeat domain 47 ...	no	no	no	no
ENSG00000244716	555	58	482	424	87	12.0332	1		108992282	108992836	ribosomal protein L1...	no	no	no	no
ENSG00000197780	1401	671	671	0	0	100	1	TAF13	109062496	109076012	TATA-box binding pro...	no	no	no	no
ENSG00000273382	2888	12	12	0	0	100	1	TMEM167B-DT	109087971	109090858	TMEM167B divergent t...	no	no	no	no
ENSG00000215717	3613	1160	1160	0	0	100	1	TMEM167B	109090764	109096934	transmembrane protei...	no	no	no	no
ENSG00000251484	609	12	12	0	0	100	1		109103535	109104766	poly(rC) binding pro...	no	no	no	no
ENSG00000116299	9194	73	73	0	0	100	1	ELAPOR1	109113679	109206781	endosome-lysosome as...	no	no	no	no
ENSG00000031698	3849	4840	4867	27	0	99.4452	1	SARS1	109213918	109238182	seryl-tRNA synthetas...	no	no	no	no
ENSG00000143126	12830	2136	2144	8	0	99.6269	1	CELSR2	109249539	109275751	cadherin EGF LAG sev...	no	no	no	no
ENSG00000134222	2855	3242	3246	4	0	99.8768	1	PSRC1	109279556	109283186	proline and serine r...	no	no	no	no
ENSG00000221986	1759	10	10	0	0	100	1	MYBPHL	109292365	109307011	myosin binding prote...	no	no	no	no
ENSG00000134243	9127	4900	4904	4	0	99.9184	1	SORT1	109309568	109397918	sortilin 1 [Source:H...	no	no	no	no
ENSG00000143106	5734	5401	5417	16	0	99.7046	1	PSMA5	109399042	109426448	proteasome 20S subun...	no	no	no	no
ENSG00000143028	4042	113	113	0	0	100	1	SYPL2	109466546	109482134	synaptophysin like 2...	no	no	no	no
ENSG00000162650	5232	450	450	0	0	100	1	ATXN7L2	109483479	109492804	ataxin 7 like 2 [Sou...	no	no	no	no
ENSG00000174151	5690	340	340	0	0	100	1	CYB561D1	109494052	109502932	cytochrome b561 fami...	no	no	no	no
ENSG00000181754	5141	256	256	0	0	100	1	AMIGO1	109504178	109509738	adhesion molecule wi...	no	no	no	no
ENSG00000156097	5057	23	23	0	0	100	1	GPR61	109539872	109548406	G protein-coupled re...	no	no	no	no
ENSG00000065135	9044	4575	4587	12	0	99.7384	1	GNAI3	109548615	109600195	G protein subunit al...	no	no	no	no
ENSG00000134183	1421	21	21	0	0	100	1	GNAT2	109603091	109619929	G protein subunit al...	no	no	no	no
ENSG00000116337	8938	1444	1444	0	0	100	1	AMPD2	109616104	109632051	adenosine monophosph...	no	no	no	no
ENSG00000235045	730	4	4	0	0	100	1	RPL7P8	109651370	109652099	ribosomal protein L7...	no	no	no	no
ENSG00000168765	5727	581	603	22	3	96.3516	1	GSTM4	109656099	109665496	glutathione S-transf...	no	no	no	no
ENSG00000213366	9116	217	324	107	33	66.9753	1	GSTM2	109668022	109709551	glutathione S-transf...	no	no	no	no
ENSG00000134201	6067	385	389	4	1	98.9717	1	GSTM5	109711780	109775428	glutathione S-transf...	no	no	no	no
ENSG00000241720	808	2	2	0	0	100	1		109725820	109775252	novel transcript	no	no	no	no
ENSG00000134202	4750	87	87	0	0	100	1	GSTM3	109733932	109741038	glutathione S-transf...	no	no	no	no
ENSG00000198758	3477	6	6	0	0	100	1	EPS8L3	109750080	109764027	EPS8 like 3 [Source:...	no	no	no	no
ENSG00000228420	476	4	4	0	0	100	1	LINC01768	109828355	109871436	long intergenic non-...	no	no	no	no
ENSG00000184371	5238	268	268	0	0	100	1	CSF1	109910242	109930992	colony stimulating f...	no	no	no	no
ENSG00000168710	5035	7830	7966	136	1	98.2927	1	AHCYL1	109984765	110023742	adenosylhomocysteina...	no	no	no	no
ENSG00000143093	7344	2202	2206	4	0	99.8187	1	STRIP1	110031577	110074641	striatin interacting...	no	no	no	no
ENSG00000258634	4216	865	874	9	1	98.9703	1		110058340	110062555	novel transcript, an...	no	no	no	no
ENSG00000197106	6636	13	13	0	0	100	1	SLC6A17	110150494	110202202	solute carrier famil...	no	no	no	no
ENSG00000116396	26071	1463	1467	4	0	99.7273	1	KCNC4	110210314	110283100	potassium voltage-ga...	no	no	no	no
ENSG00000227963	2611	16	16	0	0	100	1	RBM15-AS1	110286375	110339171	RBM15 antisense RNA ...	no	no	no	no
ENSG00000162775	4670	1587	1587	0	0	100	1	RBM15	110338506	110346681	RNA binding motif pr...	no	no	no	no
ENSG00000224699	12654	254	254	0	0	100	1	LAMTOR5-AS1	110347116	110443817	LAMTOR5 antisense RN...	no	no	no	no
ENSG00000168679	3164	257	257	0	0	100	1	SLC16A4	110362851	110391082	solute carrier famil...	no	no	no	no
ENSG00000273373	2850	1178	1178	0	0	100	1	SLC16A4-AS1	110370154	110373003	SLC16A4 antisense RN...	no	no	no	no
ENSG00000134248	2388	1396	1404	8	0	99.4302	1	LAMTOR5	110401249	110407942	late endosomal/lysos...	no	no	no	no
ENSG00000143105	1959	4	4	0	0	100	1	KCNA10	110517217	110519175	potassium voltage-ga...	no	no	no	no
ENSG00000177301	18723	42	42	0	0	100	1	KCNA2	110519837	110631474	potassium voltage-ga...	no	no	no	no
ENSG00000259834	3481	66	66	0	0	100	1	AL365361.1	110653560	110657040	lncRNA	no	no	no	no
ENSG00000177272	2476	24	24	0	0	100	1	KCNA3	110653560	110674940	potassium voltage-ga...	no	no	no	no
ENSG00000237415	865	2	2	0	0	100	1	NRBF2P3	110848077	110848941	nuclear receptor bin...	no	no	no	no
ENSG00000143119	2152	29	29	0	0	100	1	CD53	110871188	110899922	CD53 molecule [Sourc...	no	no	no	no
ENSG00000261654	5985	23	23	0	0	100	1		110936369	110942353	novel transcript, se...	no	no	no	no
ENSG00000232811	2359	33	33	0	0	100	1		110943467	110952848	novel transcript	no	no	no	no
ENSG00000121931	3502	812	820	8	0	99.0244	1	LRIF1	110947190	110963965	ligand dependent nuc...	no	no	no	no
ENSG00000273010	1348	2	2	0	0	100	1		110963302	110964649	novel transcript, an...	no	no	no	no
ENSG00000156171	3138	1752	1760	8	0	99.5455	1	DRAM2	111117163	111140203	DNA damage regulated...	no	no	no	no
ENSG00000134255	8418	934	936	2	0	99.7863	1	CEPT1	111139479	111185104	choline/ethanolamine...	no	no	no	no
ENSG00000162777	6677	123	123	0	0	100	1	DENND2D	111185969	111204535	DENN domain containi...	no	no	no	no
ENSG00000173947	3949	286	286	0	0	100	1	PIFO	111346600	111353013	primary cilia format...	no	no	no	no
ENSG00000227179	1358	4	4	0	0	100	1	PGBP	111382860	111391819	pepsinogen B, pseudo...	no	no	no	no
ENSG00000085465	2520	584	590	6	1	98.9831	1	OVGP1	111414319	111427735	oviductal glycoprote...	no	no	no	no
ENSG00000260948	2023	317	317	0	0	100	1		111431046	111433068	novel transcript, se...	no	no	no	no
ENSG00000233337	524	87	87	0	0	100	1	UBE2FP3	111437514	111438037	UBE2F pseudogene 3 [...	no	no	no	no
ENSG00000243960	861	47	47	0	0	100	1		111438638	111441364	novel transcript	no	no	no	no
ENSG00000116455	2685	1761	1777	16	0	99.0996	1	WDR77	111439890	111449256	WD repeat domain 77 ...	no	no	no	no
ENSG00000199890	111	13	13	0	0	100	1		111446798	111446908	Y RNA [Source:RFAM;A...	no	no	no	no
ENSG00000116459	3138	6459	6477	18	0	99.7221	1	ATP5PB	111448864	111462773	ATP synthase periphe...	no	no	no	no
ENSG00000143110	2768	39	39	0	0	100	1	C1orf162	111473792	111478512	chromosome 1 open re...	no	no	no	no
ENSG00000121933	2428	2	2	0	0	100	1	TMIGD3	111483348	111563962	transmembrane and im...	no	no	no	no
ENSG00000282608	2560	2	2	0	0	100	1	ADORA3	111499429	111503633	adenosine A3 recepto...	no	no	no	no
ENSG00000116473	5532	1731	1739	8	0	99.54	1	RAP1A	111542218	111716691	RAP1A, member of RAS...	no	no	no	no
ENSG00000231346	1377	2	2	0	0	100	1	LINC01160	111599655	111608723	long intergenic non-...	no	no	no	no
ENSG00000197852	6393	1486	1494	8	0	99.4645	1	INKA2	111680630	111755824	inka box actin regul...	no	no	no	no
ENSG00000227811	2414	31	31	0	0	100	1	INKA2-AS1	111739579	111747798	INKA2 antisense RNA ...	no	no	no	no
ENSG00000284830	4326	19	19	0	0	100	1		111745299	111755537	novel transcript	no	no	no	no
ENSG00000064703	5585	1614	1614	0	0	100	1	DDX20	111754832	111775602	DEAD-box helicase 20...	no	no	no	no
ENSG00000171385	7863	20	20	0	0	100	1	KCND3	111770662	111989668	potassium voltage-ga...	no	no	no	no
ENSG00000231437	3590	4	4	0	0	100	1	LINC01750	111989770	111998842	long intergenic non-...	no	no	no	no
ENSG00000231246	6267	4	4	0	0	100	1	LINC02884	112176836	112360625	long intergenic non-...	no	no	no	no
ENSG00000143079	7371	1826	1826	0	0	100	1	CTTNBP2NL	112396214	112463456	CTTNBP2 N-terminal l...	no	no	no	no
ENSG00000283296	64	1	1	0	0	100	1	MIR4256	112461770	112461833	microRNA 4256 [Sourc...	no	no	no	no
ENSG00000134245	12374	110	110	0	0	100	1	WNT2B	112466541	112530165	Wnt family member 2B...	no	no	no	no
ENSG00000273483	643	11	11	0	0	100	1		112517799	112518441	novel transcript, an...	no	no	no	no
ENSG00000007341	8108	600	600	0	0	100	1	ST7L	112523514	112620825	suppression of tumor...	no	no	no	no
ENSG00000116489	3495	5301	5419	118	2	97.8225	1	CAPZA1	112619805	112671616	capping actin protei...	no	no	no	no
ENSG00000155363	6509	2647	2693	46	1	98.2919	1	MOV10	112673141	112700756	Mov10 RISC complex R...	no	no	no	no
ENSG00000225075	449	3	3	0	0	100	1		112693688	112696621	novel transcript	no	no	no	no
ENSG00000155366	4007	1252	1296	44	3	96.6049	1	RHOC	112701127	112707434	ras homolog family m...	no	no	no	no
ENSG00000271810	1078	1	1	0	0	100	1		112702614	112711433	novel protein, PPM1J...	no	no	no	no
ENSG00000155367	2874	801	806	5	0	99.3797	1	PPM1J	112709994	112715332	protein phosphatase,...	no	no	no	no
ENSG00000184599	1282	19	19	0	0	100	1	TAFA3	112718905	112727235	TAFA chemokine like ...	no	no	no	no
ENSG00000215866	3183	689	701	12	1	98.2882	1	LINC01356	112820170	112850643	long intergenic non-...	no	no	no	no
ENSG00000228040	156	2	2	0	0	100	1		112890767	112890922	ribosomal protein L3...	no	no	no	no
ENSG00000155380	5155	22523	22635	112	0	99.5052	1	SLC16A1	112911847	112957593	solute carrier famil...	no	no	no	no
ENSG00000229020	915	21	21	0	0	100	1	AKR7A2P1	112923423	112924337	AKR7A2 pseudogene 1 ...	no	no	no	no
ENSG00000226419	12677	658	667	9	1	98.6507	1	SLC16A1-AS1	112956415	113047055	SLC16A1 antisense RN...	no	no	no	no
ENSG00000287807	1389	7	7	0	0	100	1		112978610	112999636	novel transcript	no	no	no	no
ENSG00000238198	2467	19	19	0	0	100	1	LRIG2-DT	113011687	113073113	LRIG2 divergent tran...	no	no	no	no
ENSG00000198799	12467	1973	1997	24	1	98.7982	1	LRIG2	113073198	113132260	leucine rich repeats...	no	no	no	no
ENSG00000081026	8414	545	549	4	0	99.2714	1	MAGI3	113390515	113685923	membrane associated ...	no	no	no	no
ENSG00000232499	1029	2	2	0	0	100	1		113449700	113450728	heterogeneous nuclea...	no	no	no	no
ENSG00000116793	7170	1021	1025	4	0	99.6098	1	PHTF1	113696831	113759489	putative homeodomain...	no	no	no	no
ENSG00000232450	748	35	35	0	0	100	1		113698884	113699631	ribosomal protein S2...	no	no	no	no
ENSG00000081019	6819	1450	1470	20	1	98.6395	1	RSBN1	113761832	113812476	round spermatid basi...	no	no	no	no
ENSG00000134242	4497	1	1	0	0	100	1	PTPN22	113813811	113871753	protein tyrosine pho...	no	no	no	no
ENSG00000226167	1734	6	6	0	0	100	1	AP4B1-AS1	113856635	113901237	AP4B1 antisense RNA ...	no	no	no	no
ENSG00000134262	5847	343	343	0	0	100	1	AP4B1	113894194	113905201	adaptor related prot...	no	no	no	no
ENSG00000118655	3868	487	487	0	0	100	1	DCLRE1B	113904619	113914086	DNA cross-link repai...	no	no	no	no
ENSG00000235527	3090	10	10	0	0	100	1	HIPK1-AS1	113924000	113929495	HIPK1 antisense RNA ...	no	no	no	no
ENSG00000163349	9148	3649	3665	16	0	99.5634	1	HIPK1	113929324	113977869	homeodomain interact...	no	no	no	no
ENSG00000116774	2821	1782	1782	0	0	100	1	OLFML3	113979391	114035572	olfactomedin like 3 ...	no	no	no	no
ENSG00000282048	2119	260	260	0	0	100	1		114032377	114034511	novel transcript, se...	no	no	no	no
ENSG00000134207	5065	1254	1278	24	1	98.1221	1	SYT6	114089291	114153880	synaptotagmin 6 [Sou...	no	no	no	no
ENSG00000197323	9604	4733	4741	8	0	99.8313	1	TRIM33	114392790	114511203	tripartite motif con...	no	no	no	no
ENSG00000201114	109	1	1	0	0	100	1		114490724	114490832	Y RNA [Source:RFAM;A...	no	no	no	no
ENSG00000116752	1289	1519	1519	0	0	100	1	BCAS2	114567557	114581629	BCAS2 pre-mRNA proce...	no	no	no	no
ENSG00000175984	7413	228	228	0	0	100	1	DENND2C	114582848	114670422	DENN domain containi...	no	no	no	no
ENSG00000213281	4326	5452	5460	8	0	99.8535	1	NRAS	114704469	114716771	NRAS proto-oncogene,...	no	no	no	no
ENSG00000009307	5778	40562	40710	148	0	99.6365	1	CSDE1	114716913	114758676	cold shock domain co...	no	no	no	no
ENSG00000201900	105	8	8	0	0	100	1	RNY1P13	114727720	114727824	RNY1 pseudogene 13 [...	no	no	no	no
ENSG00000052723	5894	3640	3644	4	0	99.8902	1	SIKE1	114769479	114780685	suppressor of IKBKE ...	no	no	no	no
ENSG00000198765	4278	20	20	0	0	100	1	SYCP1	114854863	114995370	synaptonemal complex...	no	no	no	no
ENSG00000134198	3413	1023	1023	0	0	100	1	TSPAN2	115048011	115089503	tetraspanin 2 [Sourc...	no	no	no	no
ENSG00000285698	1354	5	5	0	0	100	1		115270767	115283763	Novel transcript	no	no	no	no
ENSG00000228035	2610	2	2	0	0	100	1	NGF-AS1	115283034	115368072	NGF antisense RNA 1 ...	no	no	no	no
ENSG00000134259	1155	4	4	0	0	100	1	NGF	115285904	115338770	nerve growth factor ...	no	no	no	no
ENSG00000173218	9045	1355	1359	4	0	99.7057	1	VANGL1	115641970	115698224	VANGL planar cell po...	no	no	no	no
ENSG00000118729	2688	4	4	0	0	100	1	CASQ2	115700021	115768714	calsequestrin 2 [Sou...	no	no	no	no
ENSG00000177551	7541	266	266	0	0	100	1	NHLH2	115836377	115843917	nescient helix-loop-...	no	no	no	no
ENSG00000214204	910	1	1	0	0	100	1	HNRNPA1P43	115856910	115857819	heterogeneous nuclea...	no	no	no	no
ENSG00000228127	2428	2	2	0	0	100	1	LINC01649	115904855	115931616	long intergenic non-...	no	no	no	no
ENSG00000163393	5277	332	332	0	0	100	1	SLC22A15	115976513	116070054	solute carrier famil...	no	no	no	no
ENSG00000163399	7277	9062	9072	10	0	99.8898	1	ATP1A1	116372668	116410261	ATPase Na+/K+ transp...	no	no	no	no
ENSG00000203865	13004	204	204	0	0	100	1	ATP1A1-AS1	116378437	116421301	ATP1A1 antisense RNA...	no	no	no	no
ENSG00000233154	1759	6	6	0	0	100	1	LINC01762	116423724	116478842	long intergenic non-...	no	no	no	no
ENSG00000224950	2302	8	8	0	0	100	1		116493016	116499212	novel transcript	no	no	no	no
ENSG00000116815	1784	210	210	0	0	100	1	CD58	116514534	116571039	CD58 molecule [Sourc...	no	no	no	no
ENSG00000177173	1157	20	20	0	0	100	1	NAP1L4P1	116532936	116534092	nucleosome assembly ...	no	no	no	no
ENSG00000143061	7400	3761	3779	18	0	99.5237	1	IGSF3	116574399	116667755	immunoglobulin super...	no	no	no	no
ENSG00000272715	383	22	22	0	0	100	1		116909149	116909531	novel transcript	no	no	no	no
ENSG00000134247	6488	2341	2365	24	1	98.9852	1	PTGFRN	116909916	116990353	prostaglandin F2 rec...	no	no	no	no
ENSG00000134256	3828	28	28	0	0	100	1	CD101	117001750	117036552	CD101 molecule [Sour...	no	no	no	no
ENSG00000236137	1946	7	7	0	0	100	1	CD101-AS1	117025482	117059490	CD101 antisense RNA ...	no	no	no	no
ENSG00000116830	10158	5752	5766	14	0	99.7572	1	TTF2	117060326	117107453	transcription termin...	no	no	no	no
ENSG00000134253	4368	618	618	0	0	100	1	TRIM45	117111060	117122587	tripartite motif con...	no	no	no	no
ENSG00000228453	381	1	1	0	0	100	1	RPS15AP9	117138229	117138609	ribosomal protein S1...	no	no	no	no
ENSG00000134258	3027	6	6	0	0	100	1	VTCN1	117143587	117210960	V-set domain contain...	no	no	no	no
ENSG00000271427	575	10	10	0	0	100	1		117364899	117365473	novel transcript	no	no	no	no
ENSG00000198162	9667	2123	2123	0	0	100	1	MAN1A2	117367449	117528872	mannosidase alpha cl...	no	no	no	no
ENSG00000183508	5654	80	80	0	0	100	1	TENT5C	117606048	117628389	terminal nucleotidyl...	no	no	no	no
ENSG00000228217	420	3	7	4	57	42.8571	1	PNRC2P1	117778087	117778506	proline rich nuclear...	no	no	no	no
ENSG00000196505	10487	717	717	0	0	100	1	GDAP2	117863485	117929621	ganglioside induced ...	no	no	no	no
ENSG00000065183	10276	3552	3564	12	0	99.6633	1	WDR3	117929720	117966543	WD repeat domain 3 [...	no	no	no	no
ENSG00000155761	9828	107	107	0	0	100	1	SPAG17	117953590	118185228	sperm associated ant...	no	no	no	no
ENSG00000092607	4344	12	12	0	0	100	1	TBX15	118883046	118989556	T-box transcription ...	no	no	no	no
ENSG00000116874	3830	445	449	4	0	99.1091	1	WARS2	119031216	119140654	tryptophanyl tRNA sy...	no	no	no	no
ENSG00000223575	957	1	1	0	0	100	1	RBMX2P3	119084998	119085954	RBMX2 pseudogene 3 [...	no	no	no	no
ENSG00000236804	753	1	1	0	0	100	1	RPS3AP12	119126539	119127291	RPS3A pseudogene 12 ...	no	no	no	no
ENSG00000231365	11469	604	604	0	0	100	1	WARS2-AS1	119140391	119275973	WARS2 antisense RNA ...	no	no	no	no
ENSG00000227056	783	2	2	0	0	100	1	RPL6P2	119219314	119220096	ribosomal protein L6...	no	no	no	no
ENSG00000227712	2921	16	16	0	0	100	1		119230313	119327915	novel transcript	no	no	no	no
ENSG00000232650	1528	37	37	0	0	100	1	LINC01780	119327399	119356182	long intergenic non-...	no	no	no	no
ENSG00000194297	129	8	8	0	0	100	1	RNU1-75P	119331397	119331525	RNA, U1 small nuclea...	no	no	no	no
ENSG00000116882	1877	6	6	0	0	100	1	HAO2	119368779	119394130	hydroxyacid oxidase ...	no	no	no	no
ENSG00000226443	998	2	2	0	0	100	1	GAPDHP32	119533749	119534746	glyceraldehyde 3 pho...	no	no	no	no
ENSG00000203855	1120	13	13	0	0	100	1	HSD3BP4	119564066	119572067	hydroxy-delta-5-ster...	no	no	no	no
ENSG00000240244	1013	2	2	0	0	100	1	GAPDHP33	119596167	119597179	glyceraldehyde 3 pho...	no	no	no	no
ENSG00000260941	1570	78	89	11	12	87.6404	1	LINC00622	119597702	119599271	long intergenic non-...	no	no	no	no
ENSG00000198857	1132	55	55	0	0	100	1	HSD3BP5	119601340	119609250	hydroxy-delta-5-ster...	no	no	no	no
ENSG00000143067	5579	1030	1038	8	0	99.2293	1	ZNF697	119619377	119648266	zinc finger protein ...	no	no	no	no
ENSG00000092621	9187	24923	24971	48	0	99.8078	1	PHGDH	119648411	119744218	phosphoglycerate deh...	no	no	no	no
ENSG00000134250	19930	5461	5592	131	2	97.6574	1	NOTCH2	119911553	120100779	notch receptor 2 [So...	no	no	no	no
ENSG00000265808	9039	1753	2057	304	14	85.2212	1	SEC22B	120150898	120176520	SEC22 homolog B, ves...	no	no	no	no
ENSG00000223804	1107	112	348	236	67	32.1839	1		120340756	120341839	Poly [ADP-ribose] po...	no	no	no	no
ENSG00000270231	5961	254	968	714	73	26.2397	1	NBPF8	120415035	120469676	NBPF member 8 [Sourc...	no	no	no	no
ENSG00000270392	1849	9	23	14	60	39.1304	1	PFN1P2	120432204	120434052	profilin 1 pseudogen...	no	no	no	no
ENSG00000275131	9444	406	662	256	38	61.3293	1	PDE4DIPP2	120489860	120701289	PDE4DIP pseudogene 2...	no	no	no	no
ENSG00000273694	145	1	1	0	0	100	1		120571120	120571264	U2 spliceosomal RNA ...	no	no	no	no
ENSG00000286106	1111	3	3	0	0	100	1	NOTCH2NLR	120723912	120794851	notch 2 N-terminal l...	no	no	no	no
ENSG00000273136	6782	385	2859	2474	86	13.4662	1	NBPF26	120723949	120842110	NBPF member 26 [Sour...	no	no	no	no
ENSG00000281741	1088	4	23	19	82	17.3913	1		120913151	120914238	TEC	no	no	no	no
ENSG00000226067	2600	303	401	98	24	75.5611	1	LINC00623	120913184	121009291	long intergenic non-...	no	no	no	no
ENSG00000285215	1420	7	9	2	22	77.7778	1		120964001	120977585	novel pseudogene, si...	no	no	no	no
ENSG00000275585	1314	33	54	21	38	61.1111	1	PDE4DIPP4	121029592	121042572	PDE4DIP pseudogene 4...	no	no	no	no
ENSG00000234998	459	11	14	3	21	78.5714	1		121087528	121116676	novel transcript, an...	no	no	no	no
ENSG00000233029	3543	12	12	0	0	100	1		121090289	121097655	novel transcript	no	no	no	no
ENSG00000223345	756	26	42	16	38	61.9048	1	H2BP1	121116862	121117242	H2B histone pseudoge...	no	no	no	no
ENSG00000213244	416	5	5	0	0	100	1	H3P4	121118195	121118610	H3 histone pseudogen...	no	no	no	no
ENSG00000188610	3033	1720	2981	1261	42	57.6988	1	FAM72B	121167646	121185539	family with sequence...	no	no	no	no
ENSG00000171943	7335	1224	3272	2048	62	37.4083	1	SRGAP2C	121184811	121392874	SLIT-ROBO Rho GTPase...	no	no	no	no
ENSG00000227082	4737	2	2	0	0	100	1	LINC02798	121396754	121463508	long intergenic non-...	no	no	no	no
ENSG00000228826	544	6	6	0	0	100	1		121494329	121511588	novel transcript	no	no	no	no
ENSG00000272583	464	27	27	0	0	100	1		121518365	121519601	novel transcript	no	no	no	no
ENSG00000231752	5745	251	255	4	1	98.4314	1	EMBP1	121519345	121568791	embigin pseudogene 1...	no	no	no	no
ENSG00000224857	426	6	6	0	0	100	1	LINC01691	121573946	121580524	long intergenic non-...	no	no	no	no
ENSG00000232721	2675	21	21	0	0	100	1		143735983	143739506	novel transcript	no	no	no	no
ENSG00000242352	2544	2	14	12	85	14.2857	1	FAM91A3P	143766540	143769083	family with sequence...	no	no	no	no
ENSG00000233430	1176	3	9	6	66	33.3333	1	PDE4DIPP3	143811359	143825837	PDE4DIP pseudogene 3...	no	no	no	no
ENSG00000234571	4107	2	2	0	0	100	1	H2BP2	143904223	143904603	H2B histone pseudoge...	no	no	no	no
ENSG00000273213	3959	34	119	85	71	28.5714	1	H3-7	143894544	143905977	H3.7 histone (putati...	no	no	no	no
ENSG00000263513	2297	503	3620	3117	86	13.895	1	FAM72C	143955287	143971986	family with sequence...	no	no	no	no
ENSG00000270872	1021	160	482	322	66	33.195	1	SRGAP2D	143975087	144068350	SLIT-ROBO Rho GTPase...	no	no	no	no
ENSG00000232527	878	5	5	0	0	100	1	LINC02802	144227029	144250326	long intergenic non-...	no	no	no	no
ENSG00000207205	165	3	3	0	0	100	1	RNVU1-15	144412576	144412740	RNA, variant U1 smal...	no	no	no	no
ENSG00000266338	5306	822	1330	508	38	61.8045	1	NBPF15	144421390	144461676	NBPF member 15 [Sour...	no	no	no	no
ENSG00000227212	399	6	6	0	0	100	1	PFN1P6	144442606	144443004	profilin 1 pseudogen...	no	no	no	no
ENSG00000196369	7230	452	3139	2687	85	14.3995	1	SRGAP2B	144887265	145095528	SLIT-ROBO Rho GTPase...	no	no	no	no
ENSG00000271644	111	1	1	0	0	100	1		144965025	144965135	RAP1, GTP-GDP dissoc...	no	no	no	no
ENSG00000215784	2423	708	3404	2696	79	20.7991	1	FAM72D	145095974	145112696	family with sequence...	no	no	no	no
ENSG00000283752	686	5	28	23	82	17.8571	1		145139986	145148375	phosphodiesterase 4D...	no	no	no	no
ENSG00000272419	6056	104	364	260	71	28.5714	1	LINC01145	145214677	145215726	long intergenic non-...	no	no	no	no
ENSG00000281571	1088	70	166	96	57	42.1687	1		145214851	145215938	TEC	no	no	no	no
ENSG00000223612	519	1	187	186	99	0.534759	1		145233001	145233519	EGFR-coamplified and...	no	no	no	no
ENSG00000236140	381	6	8	2	25	75	1		145286610	145287755	novel transcript	no	no	no	no
ENSG00000162825	18995	50	297	247	83	16.835	1	NBPF20	145289900	145425603	NBPF member 20 [Sour...	no	no	no	no
ENSG00000234367	402	2	2	0	0	100	1	PFN1P3	145407772	145408173	profilin 1 pseudogen...	no	no	no	no
ENSG00000286620	2210	8	12	4	33	66.6667	1		145459798	145462007	TEC	no	no	no	no
ENSG00000287374	1992	2	2	0	0	100	1		145475606	145480999	novel transcript	no	no	no	no
ENSG00000275064	1270	2	2	0	0	100	1	PDE4DIPP5	145509047	145520594	PDE4DIP pseudogene 5...	no	no	no	no
ENSG00000272150	3827	11	337	326	96	3.26409	1	NBPF25P	145573965	145591060	NBPF member 25, pseu...	no	no	no	no
ENSG00000117262	5561	331	1517	1186	78	21.8194	1	GPR89A	145607988	145670650	G protein-coupled re...	no	no	no	no
ENSG00000174827	2480	36	68	32	47	52.9412	1	PDZK1	145670852	145708148	PDZ domain containin...	no	no	no	no
ENSG00000117281	3971	18	18	0	0	100	1	CD160	145719471	145739288	CD160 molecule [Sour...	no	no	no	no
ENSG00000265491	11059	1384	1404	20	1	98.5755	1	RNF115	145738868	145824095	ring finger protein ...	no	no	no	no
ENSG00000186141	4690	920	924	4	0	99.5671	1	POLR3C	145824053	145844402	RNA polymerase III s...	no	no	no	no
ENSG00000186364	1657	91	91	0	0	100	1	NUDT17	145845630	145848954	nudix hydrolase 17 [...	no	no	no	no
ENSG00000131788	4806	2661	2665	4	0	99.8499	1	PIAS3	145848522	145859836	protein inhibitor of...	no	no	no	no
ENSG00000198483	3363	270	270	0	0	100	1	ANKRD35	145866560	145885866	ankyrin repeat domai...	no	no	no	no
ENSG00000143127	6242	26	26	0	0	100	1	ITGA10	145891208	145910111	integrin subunit alp...	no	no	no	no
ENSG00000131779	1718	548	552	4	0	99.2754	1	PEX11B	145911350	145918717	peroxisomal biogenes...	no	no	no	no
ENSG00000265241	5544	3683	3717	34	0	99.0853	1	RBM8A	145921556	145927678	RNA binding motif pr...	no	no	no	no
ENSG00000211451	2511	178	180	2	1	98.8889	1	GNRHR2	145919013	145925341	gonadotropin releasi...	no	no	no	no
ENSG00000271601	3991	197	197	0	0	100	1	LIX1L	145933423	145958017	limb and CNS express...	no	no	no	no
ENSG00000272031	3671	19	19	0	0	100	1	ANKRD34A	145959441	145964575	ankyrin repeat domai...	no	no	no	no
ENSG00000121851	1811	174	174	0	0	100	1	POLR3GL	145964690	145978848	RNA polymerase III s...	no	no	no	no
ENSG00000265972	3604	1626	1634	8	0	99.5104	1	TXNIP	145992435	145996579	thioredoxin interact...	no	no	no	no
ENSG00000168509	2418	16	16	0	0	100	1	HJV	146017468	146036746	hemojuvelin BMP co-r...	no	no	no	no
ENSG00000287190	1804	2	2	0	0	100	1		146050441	146052244	novel transcript	no	no	no	no
ENSG00000233396	4614	418	555	137	24	75.3153	1	LINC01719	146052566	146061952	long intergenic non-...	no	no	no	no
ENSG00000271425	14362	165	1099	934	84	15.0136	1	NBPF10	146064711	146229000	NBPF member 10 [Sour...	no	no	no	no
ENSG00000276509	2002	4	14	10	71	28.5714	1		146235806	146237807	novel transcript	no	no	no	no
ENSG00000277406	1466	20	122	102	83	16.3934	1	SEC22B4P	146321842	146328211	SEC22 homolog B4, ps...	no	no	no	no
ENSG00000287978	668	15	17	2	11	88.2353	1		146387202	146388092	novel transcript	no	no	no	no
ENSG00000276975	17641	131	318	187	58	41.195	1	HYDIN2	146547367	146898974	HYDIN axonemal centr...	no	no	no	no
ENSG00000268043	7272	976	2755	1779	64	35.4265	1	NBPF12	146938324	146996202	NBPF member 12 [Sour...	no	no	no	no
ENSG00000244371	543	5	31	26	83	16.129	1	PFN1P8	146957117	146957659	profilin 1 pseudogen...	no	no	no	no
ENSG00000234225	884	2	5	3	60	40	1		147001931	147003618	novel transcript	no	no	no	no
ENSG00000227242	1783	9	11	2	18	81.8182	1		147019656	147056593	phosphodiesterase 4D...	no	no	no	no
ENSG00000225603	1665	10	10	0	0	100	1		147050817	147052481	insulin-like growth ...	no	no	no	no
ENSG00000230832	1241	2	2	0	0	100	1	SSBL4P	147082338	147083578	small RNA binding ex...	no	no	no	no
ENSG00000283342	2090	6	6	0	0	100	1	NBPF13P	147099482	147124285	NBPF member 13, pseu...	no	no	no	no
ENSG00000131791	5460	4505	4525	20	0	99.558	1	PRKAB2	147155106	147172550	protein kinase AMP-a...	no	no	no	no
ENSG00000180867	3328	139	391	252	64	35.5499	1	PDIA3P1	147172744	147179622	protein disulfide is...	no	no	no	no
ENSG00000131781	5984	37	37	0	0	100	1	FMO5	147175351	147243050	flavin containing di...	no	no	no	no
ENSG00000226015	1657	6	6	0	0	100	1	CCT8P1	147203276	147204932	chaperonin containin...	no	no	no	no
ENSG00000131778	4301	72	72	0	0	100	1	CHD1L	147242654	147295765	chromodomain helicas...	no	no	no	no
ENSG00000278811	5564	160	160	0	0	100	1	LINC00624	147258885	147517875	long intergenic non-...	no	no	no	no
ENSG00000213226	960	1	1	0	0	100	1		147319110	147320224	prostaglandin reduct...	no	no	no	no
ENSG00000116128	6331	4851	4859	8	0	99.8354	1	BCL9	147541501	147626216	BCL9 transcription c...	no	no	no	no
ENSG00000162836	11993	1549	1561	12	0	99.2313	1	ACP6	147629652	147670524	acid phosphatase 6, ...	no	no	no	no
ENSG00000265107	3288	95	95	0	0	100	1	GJA5	147756199	147773362	gap junction protein...	no	no	no	no
ENSG00000188092	5214	327	1513	1186	78	21.6127	1	GPR89B	147928393	147993592	G protein-coupled re...	no	no	no	no
ENSG00000215859	3674	114	142	28	19	80.2817	1	PDZK1P1	147994301	148009592	PDZ domain containin...	no	no	no	no
ENSG00000273059	430	2	2	0	0	100	1		148011799	148012228	novel transcript	no	no	no	no
ENSG00000274372	2603	80	90	10	11	88.8889	1	LINC02804	148013203	148025934	long intergenic non-...	no	no	no	no
ENSG00000206791	167	30	30	0	0	100	1	RNU1-129P	148014417	148014583	RNA, U1 small nuclea...	no	no	no	no
ENSG00000206585	164	1	1	0	0	100	1	RNVU1-7	148038753	148038916	RNA, variant U1 smal...	no	no	no	no
ENSG00000229828	1641	3	3	0	0	100	1	PDE4DIPP1	148080598	148093883	PDE4DIP pseudogene 1...	no	no	no	no
ENSG00000263956	5947	1757	2660	903	33	66.0526	1	NBPF11	148102047	148152322	NBPF member 11 [Sour...	no	no	no	no
ENSG00000225080	402	44	59	15	25	74.5763	1	PFN1P4	148129497	148129898	profilin 1 pseudogen...	no	no	no	no
ENSG00000198658	933	40	46	6	13	86.9565	1	ABHD17AP1	148146395	148149566	ABHD17A pseudogene 1...	no	no	no	no
ENSG00000232265	6391	53	57	4	7	92.9825	1	LINC02805	148156139	148186980	long intergenic non-...	no	no	no	no
ENSG00000227733	16052	277	481	204	42	57.5884	1		148159213	148255012	novel transcript	no	no	no	no
ENSG00000238765	123	2	2	0	0	100	1	RNA5SP57	148193716	148193838	RNA, 5S ribosomal ps...	no	no	no	no
ENSG00000224335	217	2	2	0	0	100	1		148234273	148234489	neuroblastoma breakp...	no	no	no	no
ENSG00000234283	420	6	6	0	0	100	1	LINC01731	148271884	148280749	long intergenic non-...	no	no	no	no
ENSG00000228626	285	9	9	0	0	100	1		148288001	148288951	novel pseudogene	no	no	no	no
ENSG00000274020	7757	229	260	31	11	88.0769	1	LINC01138	148290889	148519604	long intergenic non-...	no	no	no	no
ENSG00000224481	3386	34	34	0	0	100	1		148295895	148344638	novel transcript	no	no	no	no
ENSG00000235988	331	2	2	0	0	100	1		148317683	148318013	novel pseudogene	no	no	no	no
ENSG00000283676	76	1	1	0	0	100	1	MIR5087	148334479	148334554	microRNA 5087 [Sourc...	no	no	no	no
ENSG00000272824	442	2	2	0	0	100	1		148358245	148358686	novel transcript	no	no	no	no
ENSG00000207340	164	2	2	0	0	100	1	RNVU1-1	148362370	148362533	RNA, variant U1 smal...	no	no	no	no
ENSG00000252135	135	1	1	0	0	100	1	RNU1-155P	148385829	148385963	RNA, U1 small nuclea...	no	no	no	no
ENSG00000231551	3330	51	61	10	16	83.6066	1	PDE4DIPP6	148415258	148428847	PDE4DIP pseudogene 6...	no	no	no	no
ENSG00000201183	161	2	2	0	0	100	1	RNVU1-3	148402715	148402875	RNA, variant U1 smal...	no	no	no	no
ENSG00000225871	1679	39	39	0	0	100	1		148435105	148436926	family with sequence...	no	no	no	no
ENSG00000280649	1058	57	96	39	40	59.375	1		148458814	148459871	TEC	no	no	no	no
ENSG00000270629	11985	286	2252	1966	87	12.6998	1	NBPF14	148531385	148679742	NBPF member 14 [Sour...	no	no	no	no
ENSG00000177144	1206	4	602	598	99	0.664452	1	NUDT4B	148748774	148752415	nudix hydrolase 4B [...	no	no	no	no
ENSG00000178104	27623	1988	2368	380	16	83.9527	1	PDE4DIP	148808140	149048286	phosphodiesterase 4D...	no	no	no	no
ENSG00000254539	869	2	40	38	95	5	1		149048576	149051273	novel transcript	no	no	no	no
ENSG00000269713	9046	379	812	433	53	46.6749	1	NBPF9	149052186	149103561	NBPF member 9 [Sourc...	no	no	no	no
ENSG00000274265	4291	157	366	209	57	42.8962	1		149175748	149259987	novel transcript	no	no	no	no
ENSG00000215861	1033	17	33	16	48	51.5152	1		149197992	149321732	phosphodiesterase 4D...	no	no	no	no
ENSG00000274423	573	4	17	13	76	23.5294	1	SEC22B2P	149345661	149357612	SEC22 homolog B2, ps...	no	no	no	no
ENSG00000286219	5343	68	224	156	69	30.3571	1	NOTCH2NLC	149390621	149471833	notch 2 N-terminal l...	no	no	no	no
ENSG00000271383	13754	5	13	8	61	38.4615	1	NBPF19	149475045	149556361	NBPF member 19 [Sour...	no	no	no	no
ENSG00000277147	10917	182	434	252	58	41.9355	1	LINC00869	149655731	149669321	long intergenic non-...	no	no	no	no
ENSG00000275557	447	81	134	53	39	60.4478	1		149607765	149612402	novel transcript	no	no	no	no
ENSG00000284842	2536	2	2	0	0	100	1	FAM91A2P	149675205	149677740	family with sequence...	no	no	no	no
ENSG00000234232	3340	94	138	44	31	68.1159	1	PDE4DIPP7	149720531	149734391	PDE4DIP pseudogene 7...	no	no	no	no
ENSG00000203814	3196	8	22	14	63	36.3636	1	H2BC18	149782689	149812373	H2B clustered histon...	no	no	no	no
ENSG00000233030	3543	9	9	0	0	100	1		149785659	149793020	novel transcript, an...	no	no	no	no
ENSG00000270882	1876	4	156	152	97	2.5641	1	H4C14	149832657	149839767	H4 clustered histone...	no	no	no	no
ENSG00000220323	3612	93	341	248	72	27.2727	1	H2BC19P	149843041	149843533	H2B clustered histon...	no	no	no	no
ENSG00000261716	6440	533	774	241	31	68.863	1	H2BC20P	149850193	149850772	H2B clustered histon...	no	no	no	no
ENSG00000270276	1929	2	156	154	98	1.28205	1	H4C15	149854045	149861159	H4 clustered histone...	no	no	no	no
ENSG00000264207	1234	2	315	313	99	0.634921	1		149861271	149862504	novel transcript, an...	no	no	no	no
ENSG00000184678	2194	154	154	0	0	100	1	H2BC21	149884459	149886682	H2B clustered histon...	no	no	no	no
ENSG00000184260	494	54	54	0	0	100	1	H2AC20	149886918	149887411	H2A clustered histon...	no	no	no	no
ENSG00000178096	1461	410	410	0	0	100	1	BOLA1	149887890	149900798	bolA family member 1...	no	no	no	no
ENSG00000159164	4786	3145	3147	2	0	99.9364	1	SV2A	149903318	149917844	synaptic vesicle gly...	no	no	no	no
ENSG00000143368	1704	4458	4477	19	0	99.5756	1	SF3B4	149923317	149927803	splicing factor 3b s...	no	no	no	no
ENSG00000014914	4572	326	326	0	0	100	1	MTMR11	149928651	149936879	myotubularin related...	no	no	no	no
ENSG00000264522	12227	1089	1089	0	0	100	1	OTUD7B	149937812	150010726	OTU deubiquitinase 7...	no	no	no	no
ENSG00000285184	3586	47	47	0	0	100	1		150045660	150067722	novel transcript	no	no	no	no
ENSG00000223945	870	2	2	0	0	100	1	RPL6P31	150053864	150055034	ribosomal protein L6...	no	no	no	no
ENSG00000136631	6637	1243	1247	4	0	99.6792	1	VPS45	150067279	150145329	vacuolar protein sor...	no	no	no	no
ENSG00000023902	6629	1244	1244	0	0	100	1	PLEKHO1	150149183	150164720	pleckstrin homology ...	no	no	no	no
ENSG00000285554	1155	29	29	0	0	100	1	LINC02988	150173049	150181429	long intergenic non-...	no	no	no	no
ENSG00000143401	3605	9894	10098	204	2	97.9798	1	ANP32E	150218417	150236156	acidic nuclear phosp...	no	no	no	no
ENSG00000222222	190	7	7	0	0	100	1	RNU2-17P	150236967	150237156	RNA, U2 small nuclea...	no	no	no	no
ENSG00000276110	714	10	10	0	0	100	1		150255095	150257286	novel transcript, an...	no	no	no	no
ENSG00000118298	3296	2289	2297	8	0	99.6517	1	CA14	150257251	150265078	carbonic anhydrase 1...	no	no	no	no
ENSG00000117362	3473	3954	3956	2	0	99.9494	1	APH1A	150265399	150269580	aph-1 homolog A, gam...	no	no	no	no
ENSG00000118292	1270	240	240	0	0	100	1	C1orf54	150268200	150280916	chromosome 1 open re...	no	no	no	no
ENSG00000159208	2849	291	295	4	1	98.6441	1	CIART	150282543	150287093	circadian associated...	no	no	no	no
ENSG00000266472	1500	3334	3450	116	3	96.6377	1	MRPS21	150293861	150308979	mitochondrial riboso...	no	no	no	no
ENSG00000117360	5408	2959	2975	16	0	99.4622	1	PRPF3	150321479	150353233	pre-mRNA processing ...	no	no	no	no
ENSG00000163125	8738	1956	1978	22	1	98.8878	1	RPRD2	150363091	150476566	regulation of nuclea...	no	no	no	no
ENSG00000143374	4077	2383	2383	0	0	100	1	TARS2	150487414	150507602	threonyl-tRNA synthe...	no	no	no	no
ENSG00000143369	3360	95	95	0	0	100	1	ECM1	150508062	150513789	extracellular matrix...	no	no	no	no
ENSG00000228126	566	43	43	0	0	100	1	FALEC	150515757	150518032	focally amplified lo...	no	no	no	no
ENSG00000237781	665	7	7	0	0	100	1	ADAMTSL4-AS2	150548562	150557724	ADAMTSL4 antisense R...	no	no	no	no
ENSG00000143382	6432	499	499	0	0	100	1	ADAMTSL4	150549369	150560937	ADAMTS like 4 [Sourc...	no	no	no	no
ENSG00000264553	86	2	2	0	0	100	1	MIR4257	150551929	150552014	microRNA 4257 [Sourc...	no	no	no	no
ENSG00000203804	2622	13	13	0	0	100	1	ADAMTSL4-AS1	150560202	150562115	ADAMTSL4 antisense R...	no	no	no	no
ENSG00000274963	299	2	2	0	0	100	1	RN7SL600P	150568971	150569269	RNA, 7SL, cytoplasmi...	no	no	no	no
ENSG00000143384	4371	16120	16176	56	0	99.6538	1	MCL1	150560895	150579738	MCL1 apoptosis regul...	no	no	no	no
ENSG00000253047	121	45	45	0	0	100	1		150600539	150600659		no	no	no	no
ENSG00000143420	4619	9698	9722	24	0	99.7531	1	ENSA	150600851	150629612	endosulfine alpha [S...	no	no	no	no
ENSG00000276103	117	19	19	0	0	100	1		150608507	150608623	U4 spliceosomal RNA ...	no	no	no	no
ENSG00000143457	3334	2126	2146	20	0	99.068	1	GOLPH3L	150646230	150697154	golgi phosphoprotein...	no	no	no	no
ENSG00000163131	4071	2	2	0	0	100	1	CTSS	150730079	150765957	cathepsin S [Source:...	no	no	no	no
ENSG00000143387	1824	874	894	20	2	97.7629	1	CTSK	150794880	150809577	cathepsin K [Source:...	no	no	no	no
ENSG00000143437	6448	2614	2646	32	1	98.7906	1	ARNT	150809713	150876708	aryl hydrocarbon rec...	no	no	no	no
ENSG00000143379	7093	2308	2320	12	0	99.4828	1	SETDB1	150926263	150964744	SET domain bifurcate...	no	no	no	no
ENSG00000143418	4643	4160	4167	7	0	99.832	1	CERS2	150960583	150975003	ceramide synthase 2 ...	no	no	no	no
ENSG00000231073	368	11	11	0	0	100	1		150973123	150975534	novel transcript, an...	no	no	no	no
ENSG00000143412	1594	231	231	0	0	100	1	ANXA9	150982249	150995634	annexin A9 [Source:H...	no	no	no	no
ENSG00000143409	3792	615	615	0	0	100	1	MINDY1	150996549	151008376	MINDY lysine 48 deub...	no	no	no	no
ENSG00000143363	3156	1905	1909	4	0	99.7905	1	PRUNE1	151008420	151035713	prune exopolyphospha...	no	no	no	no
ENSG00000200759	107	4	4	0	0	100	1	RNU6-884P	151022746	151022852	RNA, U6 small nuclea...	no	no	no	no
ENSG00000163141	3809	118	122	4	3	96.7213	1	BNIPL	151036321	151047720	BCL2 interacting pro...	no	no	no	no
ENSG00000143443	2320	244	244	0	0	100	1	C1orf56	151047751	151051986	chromosome 1 open re...	no	no	no	no
ENSG00000197622	4184	3659	3676	17	0	99.5375	1	CDC42SE1	151050971	151070325	CDC42 small effector...	no	no	no	no
ENSG00000213190	2483	1144	1144	0	0	100	1	MLLT11	151060397	151069544	MLLT11 transcription...	no	no	no	no
ENSG00000143458	9189	200	200	0	0	100	1	GABPB2	151070578	151125542	GA binding protein t...	no	no	no	no
ENSG00000261168	1536	2	2	0	0	100	1		151130075	151131610	novel transcript, se...	no	no	no	no
ENSG00000143434	5809	1834	1834	0	0	100	1	SEMA6C	151131685	151146631	semaphorin 6C [Sourc...	no	no	no	no
ENSG00000163154	1158	11	11	0	0	100	1	TNFAIP8L2	151156649	151159749	TNF alpha induced pr...	no	no	no	no
ENSG00000163156	3264	686	714	28	3	96.0784	1	SCNM1	151156664	151170296	sodium channel modif...	no	no	no	no
ENSG00000163155	2508	305	305	0	0	100	1	LYSMD1	151159748	151165948	LysM domain containi...	no	no	no	no
ENSG00000163157	1843	30	30	0	0	100	1	TMOD4	151169986	151176284	tropomodulin 4 [Sour...	no	no	no	no
ENSG00000163159	1780	2782	2782	0	0	100	1	VPS72	151176304	151195321	vacuolar protein sor...	no	no	no	no
ENSG00000143398	5405	4474	4494	20	0	99.555	1	PIP5K1A	151197949	151249536	phosphatidylinositol...	no	no	no	no
ENSG00000159352	3021	6348	6352	4	0	99.937	1	PSMD4	151254709	151267479	proteasome 26S subun...	no	no	no	no
ENSG00000232671	989	21	21	0	0	100	1	ZNF687-AS1	151279678	151282000	ZNF687 antisense RNA...	no	no	no	no
ENSG00000143373	6324	2695	2695	0	0	100	1	ZNF687	151281618	151292176	zinc finger protein ...	no	no	no	no
ENSG00000143393	5456	1598	1602	4	0	99.7503	1	PI4KB	151291797	151327715	phosphatidylinositol...	no	no	no	no
ENSG00000273481	481	4	4	0	0	100	1		151327949	151328429	novel transcript	no	no	no	no
ENSG00000143390	4586	2679	2683	4	0	99.8509	1	RFX5	151340640	151347326	regulatory factor X5...	no	no	no	no
ENSG00000237976	618	20	20	0	0	100	1	RFX5-AS1	151346938	151348027	RFX5 antisense RNA 1...	no	no	no	no
ENSG00000143416	3476	986	1046	60	5	94.2639	1	SELENBP1	151364304	151372707	selenium binding pro...	no	no	no	no
ENSG00000159377	2125	9955	9967	12	0	99.8796	1	PSMB4	151399560	151401937	proteasome 20S subun...	no	no	no	no
ENSG00000143442	10301	6848	6944	96	1	98.6175	1	POGZ	151402724	151459494	pogo transposable el...	no	no	no	no
ENSG00000143375	6616	5824	5908	84	1	98.5782	1	CGN	151510510	151538692	cingulin [Source:HGN...	no	no	no	no
ENSG00000252840	108	6	6	0	0	100	1		151527831	151527938		no	no	no	no
ENSG00000143367	3878	882	884	2	0	99.7738	1	TUFT1	151540305	151583583	tuftelin 1 [Source:H...	no	no	no	no
ENSG00000232536	526	1	1	0	0	100	1		151540516	151561855	novel transcript	no	no	no	no
ENSG00000143376	16711	2797	2809	12	0	99.5728	1	SNX27	151612006	151699091	sorting nexin 27 [So...	no	no	no	no
ENSG00000250734	535	3	3	0	0	100	1		151612038	151613363	novel transcript, an...	no	no	no	no
ENSG00000159409	6774	46	46	0	0	100	1	CELF3	151700058	151716803	CUGBP Elav-like fami...	no	no	no	no
ENSG00000227045	386	2	2	0	0	100	1		151701026	151708386	novel transcript	no	no	no	no
ENSG00000178796	2276	6	6	0	0	100	1	RIIAD1	151710433	151729805	regulatory subunit o...	no	no	no	no
ENSG00000143436	1740	1357	1364	7	0	99.4868	1	MRPL9	151759647	151763496	mitochondrial riboso...	no	no	no	no
ENSG00000143450	4633	21	21	0	0	100	1	OAZ3	151762899	151771334	ornithine decarboxyl...	no	no	no	no
ENSG00000249602	382	18	18	0	0	100	1		151763384	151769501	novel transcript	no	no	no	no
ENSG00000268288	515	1	1	0	0	100	1		151766486	151767000	novel transcript, an...	no	no	no	no
ENSG00000182134	5092	1661	1697	36	2	97.8786	1	TDRKH	151770107	151791416	tudor and KH domain ...	no	no	no	no
ENSG00000203288	1141	55	55	0	0	100	1	TDRKH-AS1	151790804	151794403	TDRKH antisense RNA ...	no	no	no	no
ENSG00000269489	549	2	2	0	0	100	1		151798054	151798602	novel transcript	no	no	no	no
ENSG00000213171	2644	2	2	0	0	100	1	LINGO4	151800264	151805419	leucine rich repeat ...	no	no	no	no
ENSG00000143365	6517	8	8	0	0	100	1	RORC	151806071	151831845	RAR related orphan r...	no	no	no	no
ENSG00000225556	1757	58	58	0	0	100	1	C2CD4D	151837818	151840557	C2 calcium dependent...	no	no	no	no
ENSG00000201134	102	4	4	0	0	100	1		151841736	151841837	Y RNA [Source:RFAM;A...	no	no	no	no
ENSG00000234614	506	96	96	0	0	100	1	C2CD4D-AS1	151841877	151850385	C2CD4D and THEM5 ant...	no	no	no	no
ENSG00000196407	1161	95	95	0	0	100	1	THEM5	151847101	151853712	thioesterase superfa...	no	no	no	no
ENSG00000159445	6937	599	601	2	0	99.6672	1	THEM4	151870866	151909637	thioesterase superfa...	no	no	no	no
ENSG00000285651	2795	5	5	0	0	100	1		151885251	151899333	novel transcript, an...	no	no	no	no
ENSG00000286581	661	4	4	0	0	100	1		151944890	151953985	novel transcript	no	no	no	no
ENSG00000197747	1012	2311	2311	0	0	100	1	S100A10	151982915	151993859	S100 calcium binding...	no	no	no	no
ENSG00000229021	4109	32	32	0	0	100	1		151994531	152042774	novel transcript	no	no	no	no
ENSG00000163191	649	3145	3145	0	0	100	1	S100A11	152032506	152047907	S100 calcium binding...	no	no	no	no
ENSG00000159450	6995	12	12	0	0	100	1	TCHH	152106317	152115444	trichohyalin [Source...	no	no	no	no
ENSG00000226716	789	2	2	0	0	100	1		152122534	152125065	novel transcript	no	no	no	no
ENSG00000183586	193	1	1	0	0	100	1	HMGN3P1	152399577	152399769	high mobility group ...	no	no	no	no
ENSG00000186226	1299	4	4	0	0	100	1	LCE1E	152786214	152788426	late cornified envel...	no	no	no	no
ENSG00000163206	770	2	2	0	0	100	1	SMCP	152878322	152885047	sperm mitochondria a...	no	no	no	no
ENSG00000244094	675	1	1	0	0	100	1	SPRR2F	153112121	153113516	small proline rich p...	no	no	no	no
ENSG00000203782	1245	4	4	0	0	100	1	LORICRIN	153259687	153262124	loricrin cornified e...	no	no	no	no
ENSG00000237008	690	2	2	0	0	100	1	LAPTM4BP1	153379821	153380799	lysosomal protein tr...	no	no	no	no
ENSG00000238279	531	6	6	0	0	100	1		153533430	153535129	novel transcript	no	no	no	no
ENSG00000197956	971	295	295	0	0	100	1	S100A6	153534599	153536244	S100 calcium binding...	no	no	no	no
ENSG00000196420	784	11	11	0	0	100	1	S100A5	153537147	153541765	S100 calcium binding...	no	no	no	no
ENSG00000196154	946	371	371	0	0	100	1	S100A4	153543613	153550136	S100 calcium binding...	no	no	no	no
ENSG00000188015	841	3	3	0	0	100	1	S100A3	153547329	153549258	S100 calcium binding...	no	no	no	no
ENSG00000196754	1546	8	8	0	0	100	1	S100A2	153561108	153567890	S100 calcium binding...	no	no	no	no
ENSG00000285867	3176	4	4	0	0	100	1		153586813	153606283	Novel transcript	no	no	no	no
ENSG00000188643	1701	695	695	0	0	100	1	S100A16	153606886	153613145	S100 calcium binding...	no	no	no	no
ENSG00000189334	1277	74	74	0	0	100	1	S100A14	153614255	153616986	S100 calcium binding...	no	no	no	no
ENSG00000189171	2216	573	573	0	0	100	1	S100A13	153618787	153631360	S100 calcium binding...	no	no	no	no
ENSG00000160678	3030	72	72	0	0	100	1	S100A1	153627926	153632039	S100 calcium binding...	no	no	no	no
ENSG00000272030	1054	1	1	0	0	100	1		153631438	153634397	novel transcript, an...	no	no	no	no
ENSG00000160679	5625	4177	4183	6	0	99.8566	1	CHTOP	153633982	153646306	chromatin target of ...	no	no	no	no
ENSG00000143553	1517	496	508	12	2	97.6378	1	SNAPIN	153658703	153661852	SNAP associated prot...	no	no	no	no
ENSG00000143621	2261	16069	16087	18	0	99.8881	1	ILF2	153661788	153671028	interleukin enhancer...	no	no	no	no
ENSG00000169418	4952	1389	1405	16	1	98.8612	1	NPR1	153678688	153693992	natriuretic peptide ...	no	no	no	no
ENSG00000274940	89	3	3	0	0	100	1	MIR8083	153689705	153689793	microRNA 8083 [Sourc...	no	no	no	no
ENSG00000143624	10467	5573	5601	28	0	99.5001	1	INTS3	153728050	153774808	integrator complex s...	no	no	no	no
ENSG00000143554	5470	856	856	0	0	100	1	SLC27A3	153774354	153780157	solute carrier famil...	no	no	no	no
ENSG00000143614	9244	2246	2266	20	0	99.1174	1	GATAD2B	153789030	153923360	GATA zinc finger dom...	no	no	no	no
ENSG00000231827	2303	63	79	16	20	79.7468	1		153795173	153802091	immunoglobulin super...	no	no	no	no
ENSG00000284738	1267	39	39	0	0	100	1		153923284	153935245	novel transcript, an...	no	no	no	no
ENSG00000198837	7606	5553	5568	15	0	99.7306	1	DENND4B	153929501	153946718	DENN domain containi...	no	no	no	no
ENSG00000160741	3602	1480	1502	22	1	98.5353	1	CRTC2	153947669	153958615	CREB regulated trans...	no	no	no	no
ENSG00000143570	3388	80	82	2	2	97.561	1	SLC39A1	153959099	153968184	solute carrier famil...	no	no	no	no
ENSG00000282386	710	37	37	0	0	100	1		153964361	153965070	novel transcript, an...	no	no	no	no
ENSG00000273026	415	4	4	0	0	100	1		153966516	153966930	novel transcript, an...	no	no	no	no
ENSG00000143578	2902	726	726	0	0	100	1	CREB3L4	153967534	153974361	cAMP responsive elem...	no	no	no	no
ENSG00000143543	1482	157	157	0	0	100	1	JTB	153974269	153977674	jumping translocatio...	no	no	no	no
ENSG00000272654	1418	74	74	0	0	100	1	JTB-DT	153977727	153979160	JTB divergent transc...	no	no	no	no
ENSG00000143545	2751	1085	1085	0	0	100	1	RAB13	153981617	153986358	RAB13, member RAS on...	no	no	no	no
ENSG00000177954	1028	28444	28538	94	0	99.6706	1	RPS27	153990762	153992155	ribosomal protein S2...	no	no	no	no
ENSG00000143552	5889	39	39	0	0	100	1	NUP210L	153992690	154155116	nucleoporin 210 like...	no	no	no	no
ENSG00000143549	15156	26094	26322	228	0	99.1338	1	TPM3	154155308	154194648	tropomyosin 3 [Sourc...	no	no	no	no
ENSG00000163263	674	5	5	0	0	100	1	CFAP141	154199085	154206333	cilia and flagella a...	no	no	no	no
ENSG00000143612	2670	6162	6164	2	0	99.9676	1	C1orf43	154206696	154220637	chromosome 1 open re...	no	no	no	no
ENSG00000143569	7503	9920	10096	176	1	98.2567	1	UBAP2L	154220179	154271510	ubiquitin associated...	no	no	no	no
ENSG00000201129	136	1	1	0	0	100	1	SNORA58B	154259727	154259862	small nucleolar RNA,...	no	no	no	no
ENSG00000143575	2077	2345	2345	0	0	100	1	HAX1	154272355	154275875	HCLS1 associated pro...	no	no	no	no
ENSG00000143515	7622	3551	3561	10	0	99.7192	1	ATP8B2	154325525	154351304	ATPase phospholipid ...	no	no	no	no
ENSG00000238365	60	35	35	0	0	100	1	RNU7-57P	154338743	154338802	RNA, U7 small nuclea...	no	no	no	no
ENSG00000160712	6453	104	104	0	0	100	1	IL6R	154405193	154469450	interleukin 6 recept...	no	no	no	no
ENSG00000169291	8740	71	75	4	5	94.6667	1	SHE	154469772	154502412	Src homology 2 domai...	no	no	no	no
ENSG00000163239	2706	16	16	0	0	100	1	TDRD10	154502219	154548147	tudor domain contain...	no	no	no	no
ENSG00000160714	4190	1926	1934	8	0	99.5863	1	UBE2Q1	154548577	154559028	ubiquitin conjugatin...	no	no	no	no
ENSG00000229780	432	14	14	0	0	100	1	UBE2Q1-AS1	154553609	154555017	UBE2Q1 antisense RNA...	no	no	no	no
ENSG00000286391	1653	12	12	0	0	100	1		154564855	154567749	novel transcript	no	no	no	no
ENSG00000160716	5882	241	241	0	0	100	1	CHRNB2	154567778	154580013	cholinergic receptor...	no	no	no	no
ENSG00000160710	9629	17056	17366	310	1	98.2149	1	ADAR	154581695	154628013	adenosine deaminase ...	no	no	no	no
ENSG00000287064	1224	48	48	0	0	100	1		154671593	154678345	novel transcript	no	no	no	no
ENSG00000143603	13599	136	136	0	0	100	1	KCNN3	154697455	154870281	potassium calcium-ac...	no	no	no	no
ENSG00000163344	1002	647	647	0	0	100	1	PMVK	154924740	154936719	phosphomevalonate ki...	no	no	no	no
ENSG00000270361	690	4	4	0	0	100	1		154937370	154938059	novel transcript	no	no	no	no
ENSG00000163346	3851	2865	2881	16	0	99.4446	1	PBXIP1	154944076	154956123	PBX homeobox interac...	no	no	no	no
ENSG00000268154	283	8	8	0	0	100	1		154950210	154950492	Metazoan signal reco...	no	no	no	no
ENSG00000163348	3664	2576	2580	4	0	99.845	1	PYGO2	154957026	154963853	pygopus family PHD f...	no	no	no	no
ENSG00000271380	799	5	5	0	0	100	1		154961825	154962623	novel transcript, an...	no	no	no	no
ENSG00000160691	4342	10933	11007	74	0	99.3277	1	SHC1	154962298	154974395	SHC adaptor protein ...	no	no	no	no
ENSG00000173207	2340	6490	7127	637	8	91.0622	1	CKS1B	154974653	154979251	CDC28 protein kinase...	no	no	no	no
ENSG00000264349	91	28	28	0	0	100	1	MIR4258	154975693	154975783	microRNA 4258 [Sourc...	no	no	no	no
ENSG00000160688	4019	2552	2556	4	0	99.8435	1	FLAD1	154983338	154993111	flavin adenine dinuc...	no	no	no	no
ENSG00000163352	730	4	4	0	0	100	1	LENEP	154993586	154994315	lens epithelial prot...	no	no	no	no
ENSG00000160685	4303	934	946	12	1	98.7315	1	ZBTB7B	155002630	155018523	zinc finger and BTB ...	no	no	no	no
ENSG00000163354	3071	98	98	0	0	100	1	DCST2	155018520	155033781	DC-STAMP domain cont...	no	no	no	no
ENSG00000163357	3193	68	68	0	0	100	1	DCST1	155033824	155050930	DC-STAMP domain cont...	no	no	no	no
ENSG00000232093	822	31	31	0	0	100	1	DCST1-AS1	155045191	155046118	DCST1 antisense RNA ...	no	no	no	no
ENSG00000143537	6584	2008	2012	4	0	99.8012	1	ADAM15	155050566	155062775	ADAM metallopeptidas...	no	no	no	no
ENSG00000243364	1257	662	662	0	0	100	1	EFNA4	155063737	155069553	ephrin A4 [Source:HG...	no	no	no	no
ENSG00000143590	1944	339	339	0	0	100	1	EFNA3	155078837	155087538	ephrin A3 [Source:HG...	no	no	no	no
ENSG00000169242	2165	432	432	0	0	100	1	EFNA1	155127876	155134899	ephrin A1 [Source:HG...	no	no	no	no
ENSG00000169241	2340	1771	1773	2	0	99.8872	1	SLC50A1	155135344	155138857	solute carrier famil...	no	no	no	no
ENSG00000179085	622	851	851	0	0	100	1	DPM3	155139891	155140595	dolichyl-phosphate m...	no	no	no	no
ENSG00000163463	3814	378	382	4	1	98.9529	1	KRTCAP2	155169408	155173475	keratinocyte associa...	no	no	no	no
ENSG00000163462	4533	1166	1174	8	0	99.3186	1	TRIM46	155173787	155184971	tripartite motif con...	no	no	no	no
ENSG00000185499	4717	67	117	50	42	57.265	1	MUC1	155185824	155192916	mucin 1, cell surfac...	no	no	no	no
ENSG00000231064	2466	30	30	0	0	100	1	THBS3-AS1	155194996	155205495	THBS3 antisense RNA ...	no	no	no	no
ENSG00000169231	4623	325	327	2	0	99.3884	1	THBS3	155195588	155209051	thrombospondin 3 [So...	no	no	no	no
ENSG00000173171	3278	826	1410	584	41	58.5816	1	MTX1	155208695	155213824	metaxin 1 [Source:HG...	no	no	no	no
ENSG00000160766	3656	165	301	136	45	54.8173	1	GBAP1	155214368	155218874	glucosylceramidase b...	no	no	no	no
ENSG00000236675	838	28	807	779	96	3.46964	1	MTX1P1	155230975	155234325	metaxin 1 pseudogene...	no	no	no	no
ENSG00000177628	3648	400	544	144	26	73.5294	1	GBA1	155234452	155244699	glucosylceramidase b...	no	no	no	no
ENSG00000160767	4468	3020	3024	4	0	99.8677	1	ENTREP3	155247205	155255483	endosomal transmembr...	no	no	no	no
ENSG00000116521	2442	1696	1700	4	0	99.7647	1	SCAMP3	155255979	155262430	secretory carrier me...	no	no	no	no
ENSG00000176444	3658	3183	3187	4	0	99.8745	1	CLK2	155262868	155278491	CDC like kinase 2 [S...	no	no	no	no
ENSG00000143630	4241	531	531	0	0	100	1	HCN3	155277463	155289848	hyperpolarization ac...	no	no	no	no
ENSG00000143627	3168	120	120	0	0	100	1	PKLR	155289293	155301438	pyruvate kinase L/R ...	no	no	no	no
ENSG00000160752	3718	4329	4367	38	0	99.1298	1	FDPS	155308748	155320666	farnesyl diphosphate...	no	no	no	no
ENSG00000225855	3516	579	593	14	2	97.6391	1	RUSC1-AS1	155316863	155324176	RUSC1 antisense RNA ...	no	no	no	no
ENSG00000160753	5429	1996	2000	4	0	99.8	1	RUSC1	155320894	155331114	RUN and SH3 domain c...	no	no	no	no
ENSG00000116539	13381	2973	2985	12	0	99.598	1	ASH1L	155335268	155563162	ASH1 like histone ly...	no	no	no	no
ENSG00000237872	1085	14	16	2	12	87.5	1	POU5F1P4	155433178	155434262	POU class 5 homeobox...	no	no	no	no
ENSG00000235919	1209	178	178	0	0	100	1	ASH1L-AS1	155562026	155563944	ASH1L antisense RNA ...	no	no	no	no
ENSG00000271267	257	30	30	0	0	100	1		155566050	155566306	ATP synthase, H+ tra...	no	no	no	no
ENSG00000232519	220	1	1	0	0	100	1		155609776	155610380	novel transcript, an...	no	no	no	no
ENSG00000125459	4192	699	1412	713	50	49.5042	1	MSTO1	155563235	155614951	misato mitochondrial...	no	no	no	no
ENSG00000246203	2505	13	53	40	75	24.5283	1		155614726	155660245	novel pseudogene	no	no	no	no
ENSG00000287839	1259	10	47	37	78	21.2766	1		155626755	155637604	novel transcript	no	no	no	no
ENSG00000163374	5001	1782	2044	262	12	87.182	1	YY1AP1	155659443	155689000	YY1 associated prote...	no	no	no	no
ENSG00000132676	4588	3997	4061	64	1	98.424	1	DAP3	155687960	155739010	death associated pro...	no	no	no	no
ENSG00000227673	157	1	1	0	0	100	1		155710098	155710563	novel transcript, an...	no	no	no	no
ENSG00000203761	1709	300	705	405	57	42.5532	1	MSTO2P	155745829	155750137	misato family member...	no	no	no	no
ENSG00000116580	11967	3223	3635	412	11	88.6657	1	GON4L	155749659	155859400	gon-4 like [Source:H...	no	no	no	no
ENSG00000234937	941	2	2	0	0	100	1		155845367	155846624	proteasome (prosome,...	no	no	no	no
ENSG00000132718	5182	1310	1310	0	0	100	1	SYT11	155859567	155885199	synaptotagmin 11 [So...	no	no	no	no
ENSG00000283442	106	2	2	0	0	100	1		155894281	155894386	U4 spliceosomal RNA ...	no	no	no	no
ENSG00000143622	4038	940	940	0	0	100	1	RIT1	155897808	155911404	Ras like without CAA...	no	no	no	no
ENSG00000132680	5646	5795	5827	32	0	99.4508	1	KHDC4	155913045	155934413	KH domain containing...	no	no	no	no
ENSG00000207475	137	12	12	0	0	100	1	SNORA80E	155919909	155920045	small nucleolar RNA,...	no	no	no	no
ENSG00000116584	9155	2921	2927	6	0	99.795	1	ARHGEF2	155946851	156007070	Rho/Rac guanine nucl...	no	no	no	no
ENSG00000273002	2157	62	63	1	1	98.4127	1	ARHGEF2-AS2	155978799	155982986	ARHGEF2 antisense RN...	no	no	no	no
ENSG00000285677	2366	4	4	0	0	100	1		156001953	156033342	Novel transcript, an...	no	no	no	no
ENSG00000163479	6643	3933	3936	3	0	99.9238	1	SSR2	156009048	156020951	signal sequence rece...	no	no	no	no
ENSG00000160803	3884	2646	2712	66	2	97.5664	1	UBQLN4	156035299	156053798	ubiquilin 4 [Source:...	no	no	no	no
ENSG00000116586	1404	1056	1060	4	0	99.6226	1	LAMTOR2	156054782	156058506	late endosomal/lysos...	no	no	no	no
ENSG00000132698	1689	2083	2089	6	0	99.7128	1	RAB25	156061160	156070504	RAB25, member RAS on...	no	no	no	no
ENSG00000254726	6591	4753	4777	24	0	99.4976	1	MEX3A	156072013	156082465	mex-3 RNA binding fa...	no	no	no	no
ENSG00000160789	8149	1430	1444	14	0	99.0305	1	LMNA	156082573	156140081	lamin A/C [Source:HG...	no	no	no	no
ENSG00000196189	6771	410	410	0	0	100	1	SEMA4A	156147366	156177752	semaphorin 4A [Sourc...	no	no	no	no
ENSG00000252236	141	2	2	0	0	100	1		156192063	156192203		no	no	no	no
ENSG00000160785	7293	1144	1144	0	0	100	1	SLC25A44	156193932	156212796	solute carrier famil...	no	no	no	no
ENSG00000160783	2520	1083	1083	0	0	100	1	PMF1	156212993	156240042	polyamine modulated ...	no	no	no	no
ENSG00000242252	964	31	31	0	0	100	1	BGLAP	156242184	156243317	bone gamma-carboxygl...	no	no	no	no
ENSG00000160781	2531	206	206	0	0	100	1	PAQR6	156243320	156248117	progestin and adipoQ...	no	no	no	no
ENSG00000198952	5304	7816	7852	36	0	99.5415	1	SMG5	156249224	156282825	SMG5 nonsense mediat...	no	no	no	no
ENSG00000163472	3032	72	72	0	0	100	1	TMEM79	156282935	156293185	transmembrane protei...	no	no	no	no
ENSG00000198715	3471	1097	1101	4	0	99.6367	1	GLMP	156290089	156295689	glycosylated lysosom...	no	no	no	no
ENSG00000163468	3864	22198	22206	8	0	99.964	1	CCT3	156308968	156367873	chaperonin containin...	no	no	no	no
ENSG00000163467	1115	61	61	0	0	100	1	TSACC	156337314	156346995	TSSK6 activating coc...	no	no	no	no
ENSG00000132677	3384	77	77	0	0	100	1	RHBG	156369211	156385219	Rh family B glycopro...	no	no	no	no
ENSG00000237390	5586	16	16	0	0	100	1		156388226	156395609	novel transcript	no	no	no	no
ENSG00000125462	13742	414	414	0	0	100	1	MIR9-1HG	156404250	156456763	MIR9-1 host gene [So...	no	no	no	no
ENSG00000116604	6351	1964	1979	15	0	99.242	1	MEF2D	156463727	156500779	myocyte enhancer fac...	no	no	no	no
ENSG00000183856	6742	2748	2752	4	0	99.8547	1	IQGAP3	156525405	156572604	IQ motif containing ...	no	no	no	no
ENSG00000187862	2829	10	10	0	0	100	1	TTC24	156579723	156587719	tetratricopeptide re...	no	no	no	no
ENSG00000163382	1933	2477	2531	54	2	97.8665	1	NAXE	156591756	156609507	NAD(P)HX epimerase [...	no	no	no	no
ENSG00000160818	4623	3070	3086	16	0	99.4815	1	GPATCH4	156594301	156601496	G-patch domain conta...	no	no	no	no
ENSG00000272971	547	8	8	0	0	100	1		156614742	156615288	novel transcript	no	no	no	no
ENSG00000132702	2204	55	55	0	0	100	1	HAPLN2	156619331	156625725	hyaluronan and prote...	no	no	no	no
ENSG00000272068	3222	4	4	0	0	100	1	BCAN-AS1	156637783	156641004	BCAN antisense RNA 1...	no	no	no	no
ENSG00000132692	4765	74	76	2	2	97.3684	1	BCAN	156641390	156659532	brevican [Source:HGN...	no	no	no	no
ENSG00000272405	3222	13	13	0	0	100	1		156641666	156644887	novel transcript, an...	no	no	no	no
ENSG00000229953	758	3	3	0	0	100	1	BCAN-AS2	156646507	156661424	BCAN antisense RNA 2...	no	no	no	no
ENSG00000132688	5568	9573	9612	39	0	99.5943	1	NES	156668763	156677407	nestin [Source:HGNC ...	no	no	no	no
ENSG00000237588	4122	5	5	0	0	100	1		156687695	156691997	novel transcript	no	no	no	no
ENSG00000143320	1082	2615	2615	0	0	100	1	CRABP2	156699606	156705816	cellular retinoic ac...	no	no	no	no
ENSG00000223356	433	4	4	0	0	100	1		156712212	156713174	novel transcript	no	no	no	no
ENSG00000143319	5229	2807	2833	26	0	99.0822	1	ISG20L2	156721891	156728766	interferon stimulate...	no	no	no	no
ENSG00000143303	3169	1117	1121	4	0	99.6432	1	METTL25B	156728442	156736960	methyltransferase li...	no	no	no	no
ENSG00000143314	1695	1061	1061	0	0	100	1	MRPL24	156737303	156741590	mitochondrial riboso...	no	no	no	no
ENSG00000143321	3674	20578	20682	104	0	99.4971	1	HDGF	156742109	156766925	heparin binding grow...	no	no	no	no
ENSG00000143294	4071	2683	2701	18	0	99.3336	1	PRCC	156750610	156800815	proline rich mitotic...	no	no	no	no
ENSG00000027869	2498	324	328	4	1	98.7805	1	SH2D2A	156806243	156816848	SH2 domain containin...	no	no	no	no
ENSG00000198400	5205	1	1	0	0	100	1	NTRK1	156815636	156881850	neurotrophic recepto...	no	no	no	no
ENSG00000027644	5200	8	8	0	0	100	1	INSRR	156840063	156859117	insulin receptor rel...	no	no	no	no
ENSG00000187800	5530	149	149	0	0	100	1	PEAR1	156893698	156916429	platelet endothelial...	no	no	no	no
ENSG00000160838	2649	21	21	0	0	100	1	LRRC71	156920632	156933094	leucine rich repeat ...	no	no	no	no
ENSG00000132694	9322	3368	3387	19	0	99.439	1	ARHGEF11	156934840	157045742	Rho guanine nucleoti...	no	no	no	no
ENSG00000237842	1531	2	2	0	0	100	1	SMU1P1	157059232	157060762	SMU1 pseudogene 1 [S...	no	no	no	no
ENSG00000224520	1447	4	4	0	0	100	1	KRT8P45	157073257	157074703	keratin 8 pseudogene...	no	no	no	no
ENSG00000253831	2100	10	22	12	54	45.4545	1	ETV3L	157092043	157112412	ETS variant transcri...	no	no	no	no
ENSG00000117036	6707	1192	1228	36	2	97.0684	1	ETV3	157121191	157138474	ETS variant transcri...	no	no	no	no
ENSG00000229961	5817	6	6	0	0	100	1		157182860	157187081	novel SLAM family me...	no	no	no	no
ENSG00000228239	399	2	2	0	0	100	1		157232231	157237136	novel transcript	no	no	no	no
ENSG00000271736	1647	4	4	0	0	100	1	LINC02772	157273760	157283968	long intergenic non-...	no	no	no	no
ENSG00000143297	12414	82	82	0	0	100	1	FCRL5	157513377	157552515	Fc receptor like 5 [...	no	no	no	no
ENSG00000236731	505	3	3	0	0	100	1		157629939	157630728	pseudogene similar t...	no	no	no	no
ENSG00000233712	552	7	7	0	0	100	1		157636300	157642751	pseudogene similar t...	no	no	no	no
ENSG00000183853	7872	3049	3065	16	0	99.478	1	KIRREL1	157993273	158100262	kirre like nephrin f...	no	no	no	no
ENSG00000226520	587	2	2	0	0	100	1	KIRREL1-IT1	158025550	158031166	KIRREL1 intronic tra...	no	no	no	no
ENSG00000231666	2071	1	1	0	0	100	1	LINC01704	158131983	158149810	long intergenic non-...	no	no	no	no
ENSG00000158473	4359	59	63	4	6	93.6508	1	CD1D	158178030	158186427	CD1d molecule [Sourc...	no	no	no	no
ENSG00000231434	2167	4	4	0	0	100	1	HSP90AA3P	158523672	158525838	heat shock protein 9...	no	no	no	no
ENSG00000163565	5294	108	124	16	12	87.0968	1	IFI16	158999968	159055155	interferon gamma ind...	no	no	no	no
ENSG00000163568	1874	63	67	4	5	94.0299	1	AIM2	159061599	159187843	absent in melanoma 2...	no	no	no	no
ENSG00000233473	663	11	11	0	0	100	1	RAD1P2	159081133	159081795	RAD1 pseudogene 2 [S...	no	no	no	no
ENSG00000162706	3847	164	164	0	0	100	1	CADM3	159171609	159203313	cell adhesion molecu...	no	no	no	no
[truncated: 27,331 more rows]

## Sheet: JS1_CloneB
Chr Y Simulation
[truncated: 28,830 more rows]

## Sheet: Legend
Supplemental Data S12: Analysis of multimapping and uniquely assigned reads in three iPSC-JS clones
