# Supplementary material for: An iPSC-based model of 47,XYY Jacobs syndrome reveals a DNA methylation-independent transcriptional dysregulation shared with male X aneuploid cells
Source: Genome Res. 2025 Jul;35(7):1503–17. doi: 10.1101/gr.279716.124 (PMC12212075; doi:10.1101/gr.279716.124)
Supplement: Supplement 15 [file Supplemental_Table_S2_R3.xlsx]

## Sheet: Sheet1
Supplemental Table S2:STR analysis on Fibroblasts and iPSC clones
Cell Lines	Amelogenin	D3S1358	vWA	D16S539	CSF1PO	TPOX	Y indel	D8S1179	D21S11	D18S51	DYS391	D2S441	D19S433	TH01	FGA	D22S1045	D5S818	D13S317	D7S820	SE33	D10S1248	D1S1656	D12S391	D2S1338
JS1-Fs	X/Y	16	16/21	10/11	8/12	8	2	14	29/31.2	16	10	14	14	7	22/27	10/11	8/11	11/13	8/11	15/16	13/15	18.3	21/22	23/245
JS1 IPSCs#A	X/Y	16	16/21	10/11	8/12	8	2	14	29/31.2	16	10	14	14	7	22/27	10/11	8/11	11/13	8/11	15/16	13/15	18.3	21/22	23/25
JS2-Fs	X/Y	17/18	17/19	10/12	12	8	2	13/14	28/29	12/17	1214	14	13/16	6/9.3	22/25	15/16	11/12	8/11	8/11	18/30.2	15/16	15/18.3	17	20/24
JS2 IPSCs#A	X/Y	17/18	17/19	10/12	12	8	2	13/14	28/29	12/17	12	14	13/16	6/9.3	22/25	15/16	11/12	8/11	8/11	18/30.2	15/16	15/18.3	17	20/24
JS3-Fs	X/Y	16	16/18	11/12	10	11	2	13	30/31.2	14/20	11	11/12	13/15	9/10	23/25	14/16	11/12	11/13	10/12	16/18	13	11/13	15/19	21/23
JS3 IPSCs#A	X/Y	16	16/18	11/12	10	11	2	13	30/31.2	14/20	11	11/12	13/15	9/10	23/25	14/16	11/12	11/13	10/12	16/18	13	11/13	15/19	21/23

## Sheet: Legend
Supplemental table S2: List of informative STRs unequivocally assigned to each fibroblast patient and corresponding iPSC clones
