# Supplementary material for: An iPSC-based model of 47,XYY Jacobs syndrome reveals a DNA methylation-independent transcriptional dysregulation shared with male X aneuploid cells
Source: HighWire-hosted journal article supplement (doi:10.1101/gr.279716.124), 2025-06-10
Supplement: Supplemental_Figures.pdf [file Supplemental_Figures.pdf]

**A**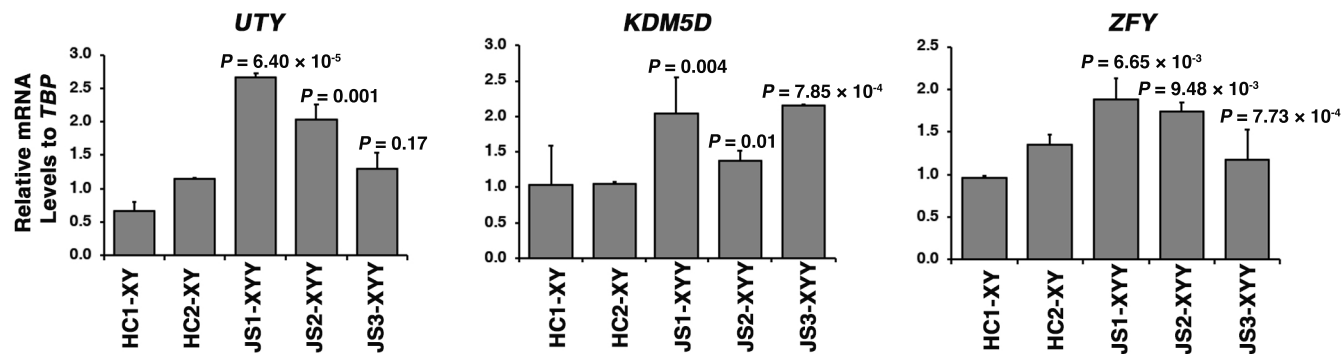**B**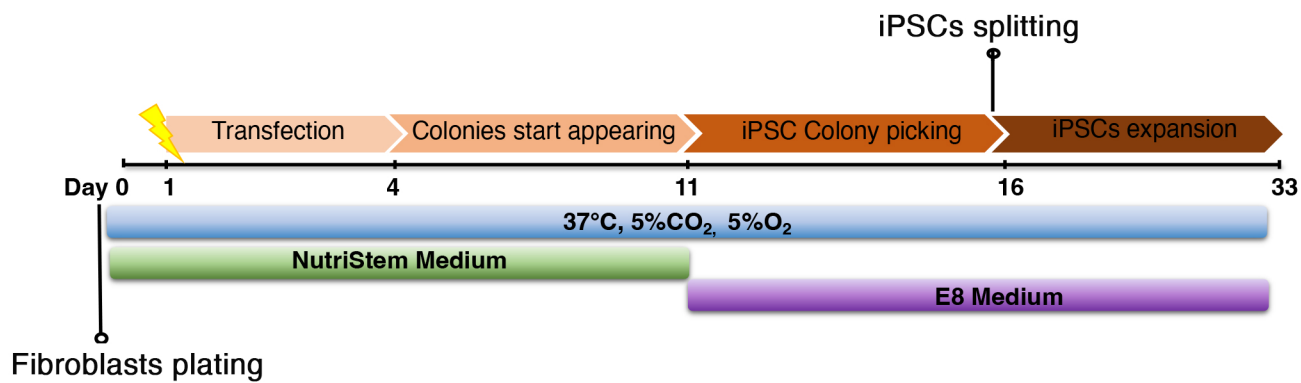**Supplemental\_Fig\_S1**

**Supplemental Fig S1: 47,XYY Fibroblasts reprogramming into iPSCs. A)** mRNA expression of the *UTY*, *ZFY*, and *KDM5D* Y-linked genes by Taqman assay in 47,XYY and 46,XY fibroblasts. Values are normalized on the housekeeping gene TATA box-binding protein (*TBP*). Bars are the average  $\pm$  std of three independent experiments for each iPSC clone. Values from two 46,XY control's fibroblasts were merged (n=6) to perform a Student's *t*-test, one-tailed distribution, two-sample equal variance. HC, healthy controls 46,XY. **B)** Schematic of the mRNA non-integrative reprogramming method used in the study.



Chr X Chr Y DAPI

JS1 Clone B

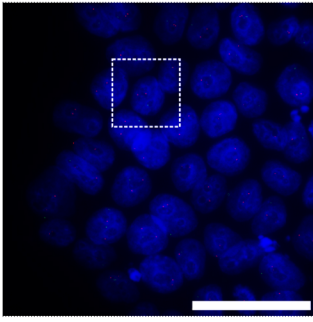

JS1 Clone C

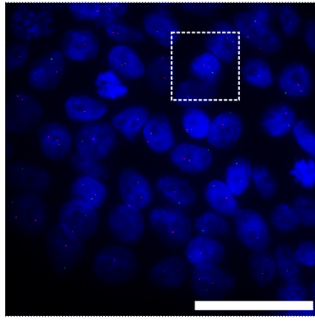

JS2 Clone B

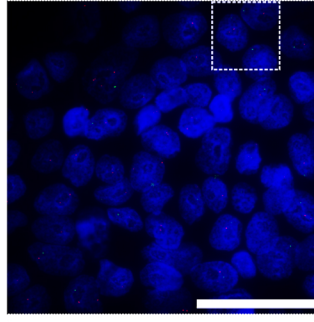

JS2 Clone C

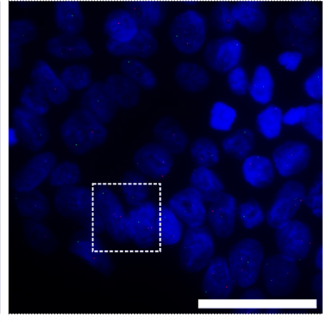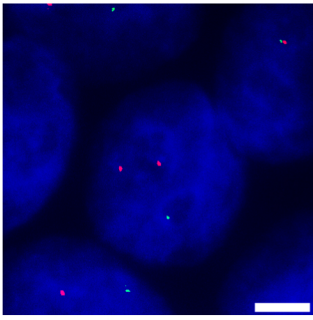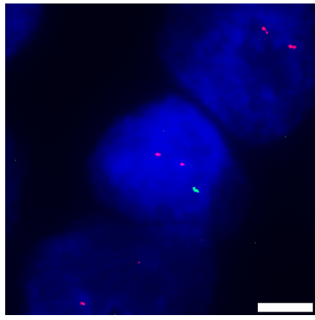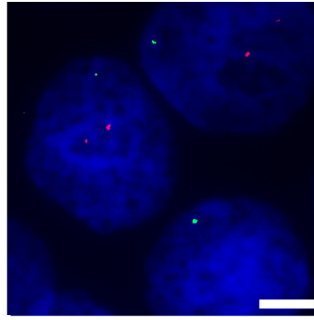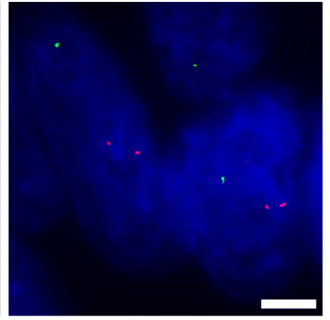

JS3 Clone B

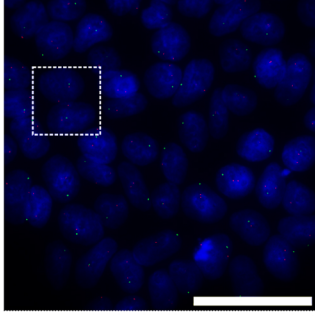

JS3 Clone C

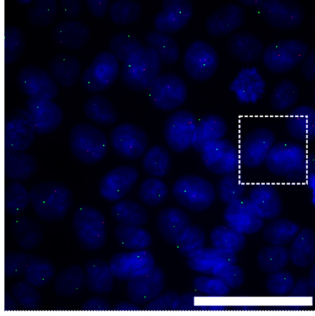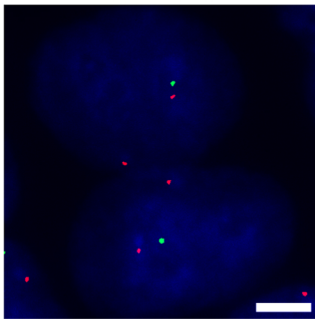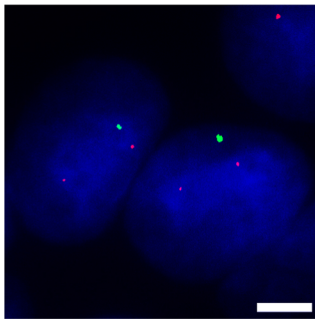

Chr X Chr Y DAPI

Supplemental\_Fig\_S2

**Supplemental Fig S2: Validation by DNA-FISH of Y Chromosome copy gain in iPSCs.** Top: Representative DNA-FISH images showing the X Chromosome (green) and Y Chromosome (red) in JS-iPSCs. DNA is stained with DAPI (blue). Scale bar = 50  $\mu\text{m}$ . Bottom: Magnified view of the dashed square in the top image. Scale bar = 5  $\mu\text{m}$ .

**A**

| Clone name  | Chromosome | Type | Cytoband Start | CN State | Size (kbp) |
|-------------|------------|------|----------------|----------|------------|
| JS1 Clone A | Y          | Gain | p11.2          | 2.00     | 18,642     |
|             | Y-X PAR1   | Gain | p22.33         | 3.00     | 2,111      |
| JS1 Clone B | Y          | Gain | p11.2          | 2.00     | 19,068     |
|             | Y-X PAR1   | Gain | p22.33         | 3.00     | 2,035      |
|             | 11         | Gain | q13.5          | 3.00     | 1,218      |
| JS1 Clone C | Y          | Gain | p11.2          | 2.00     | 18,604     |
|             | Y-X PAR1   | Gain | p22.33         | 3.00     | 1,504      |
| JS2 Clone A | Y          | Gain | p11.2          | 2.00     | 23,624     |
|             | Y-X PAR1   | Gain | p22.33         | 3.00     | 2,111      |
| JS2 Clone B | Y          | Gain | p11.2          | 2.00     | 23,646     |
|             | Y-X PAR1   | Gain | p22.33         | 3.00     | 2,525      |
|             | 6          | Gain | q25.1          | 3.00     | 1,998      |
| JS2 Clone C | Y          | Gain | p11.2          | 2.00     | 23,615     |
|             | Y-X PAR1   | Gain | p22.33         | 3.00     | 1,513      |
| JS3 Clone A | Y          | Gain | p11.2          | 2.00     | 21,481     |
|             | Y-X PAR1   | Gain | p22.33         | 3.00     | 1,643      |
| JS3 Clone B | Y          | Gain | p11.2          | 2.00     | 19,068     |
|             | Y-X PAR1   | Gain | p22.33         | 3.00     | 1,818      |
| JS3 Clone C | Y          | Gain | p11.2          | 2.00     | 21,481     |
|             | Y-X PAR1   | Gain | p22.33         | 3.00     | 1,643      |

**B**

iPSCs JS1 Clone B

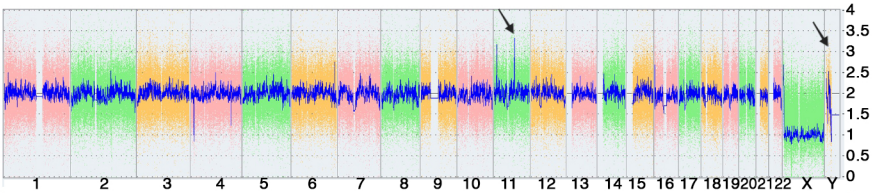

iPSCs JS1 Clone C

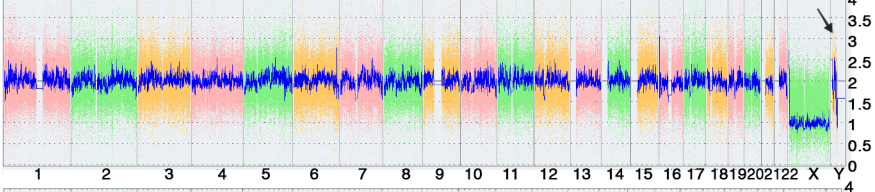

iPSCs JS2 Clone B

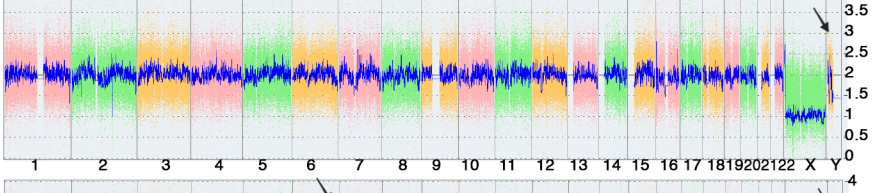

iPSCs JS2 Clone C

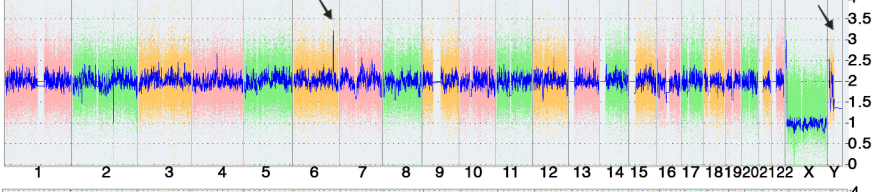

iPSCs JS3 Clone B

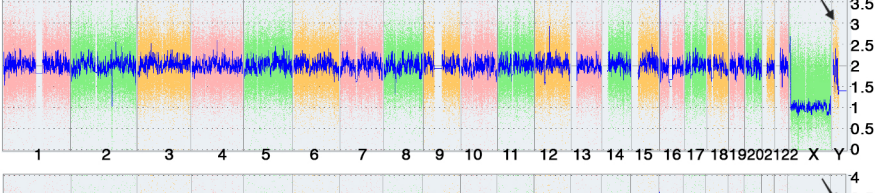

iPSCs JS3 Clone C

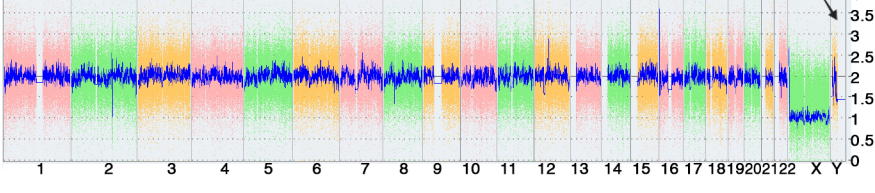

Supplemental\_Fig\_S3

**Supplemental Fig S3: Karyostat arrays on 47-XXY iPSCs. A)** Summary of the validated iPSCs. The probe binding to Xp22.33 also recognizes the Yp11.2 region and corresponds to the PAR1 territory on X and Y Chromosome, respectively; therefore, the showed X Chromosome's duplication for this region is an artifact of the probe binding to the PAR1 region of both sex chromosomes. The results show two copy number state (CN = 2) for the whole Y Chromosome except for the Yp11.2 probe (CN = 1) automatically assigned to the X Chromosome (Xp22.33, CN = 3). **B)** KaryoStat+ whole genome view. The pink, green, and yellow colors indicate the raw signal for each chromosome probe, while the blue represents the normalized probe signal, which is used to identify copy numbers and aberrations. Black arrows indicate chromosome gains.



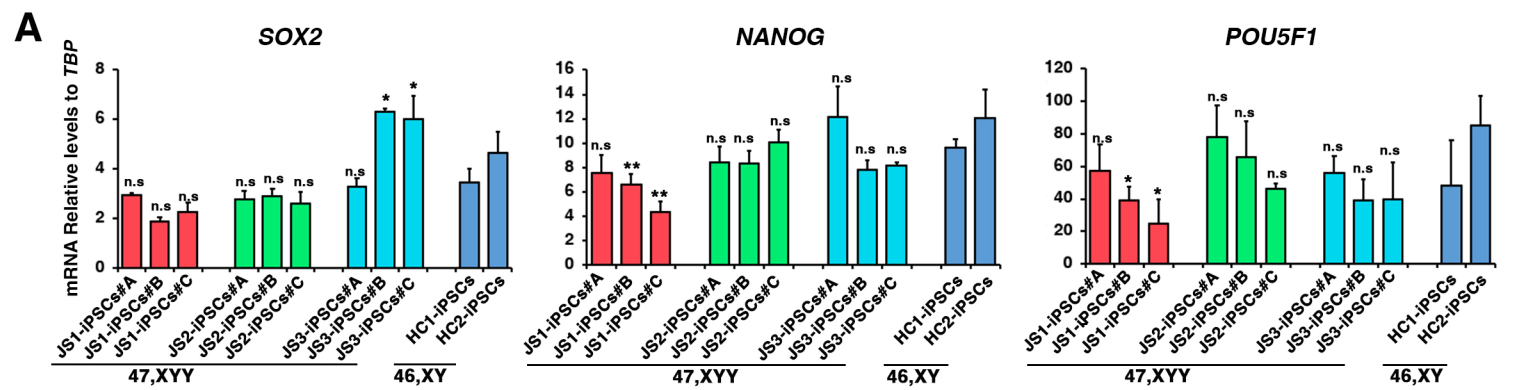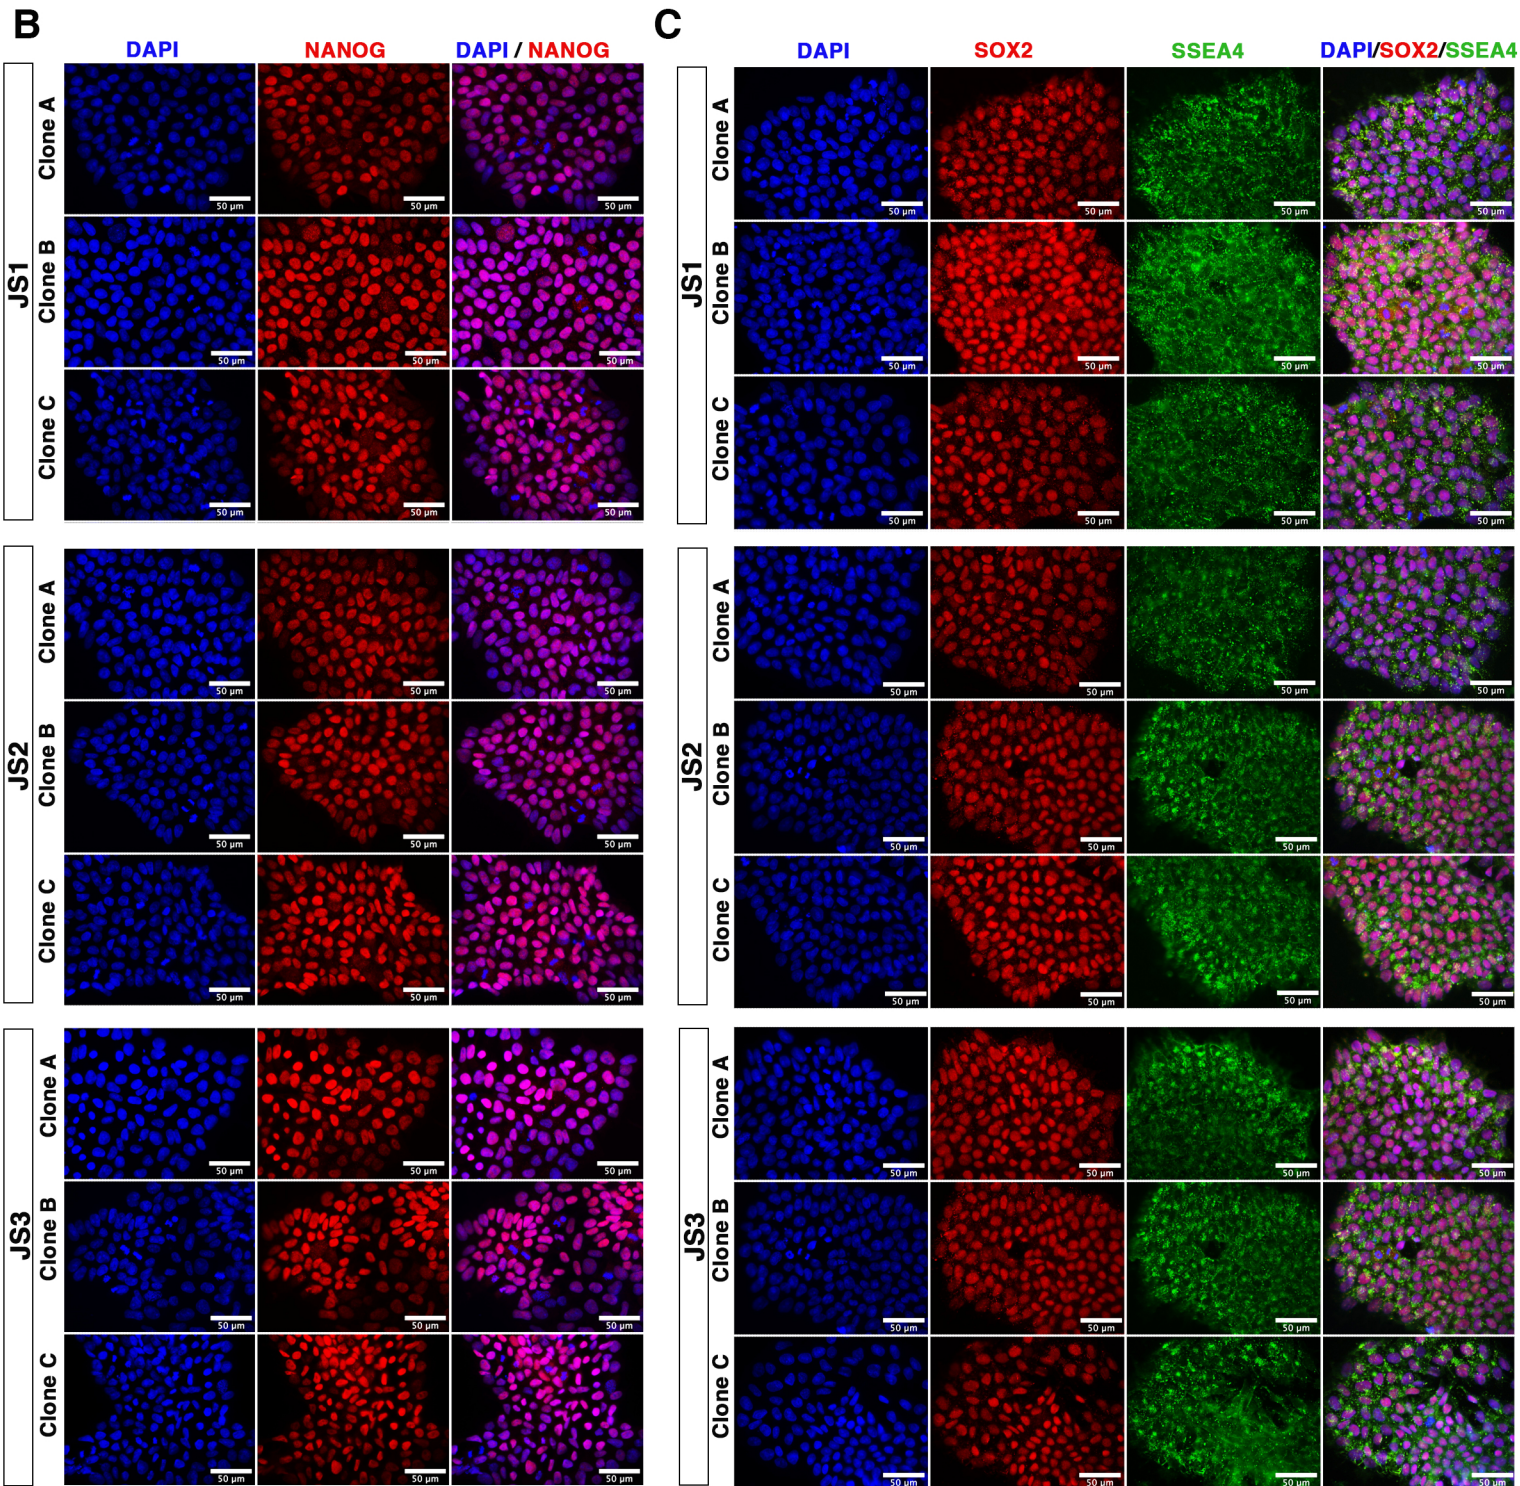

**Supplemental\_Fig\_S4**

**Supplemental Fig S4: Pluripotency characterization by immunostaining on 47,XY*iPSCs* generated in this study. A)** Transcript levels of the pluripotency markers *SOX2*, *NANOG*, and *POUF5F1* in the *iPSCs* generated in the study analyzed by TaqMan Assay. Bars are the average  $\pm$  std of three independent experiments. Values from two 46,XY control's *iPSCs* were merged (n=6) to perform a Student's *t*-test, one-tailed distribution, and two-sample equal variance. \**P* < 0.05, \*\**P* < 0.01, n.s. = not significant. **B-C)** Staining for the pluripotency markers *NANOG* (red), *SOX2* (red), and *SSEA4* (green). See **Supplemental Table S11** for antibody information. DAPI (blue) is used as a counterstain to detect nuclei. Images have been acquired using an EVOS™ FL Auto 2 Imaging System (Thermo Fisher Scientific) equipped with a 1.30NA/40X oil immersion objective (Olympus). Scale bars, 50  $\mu$ m.



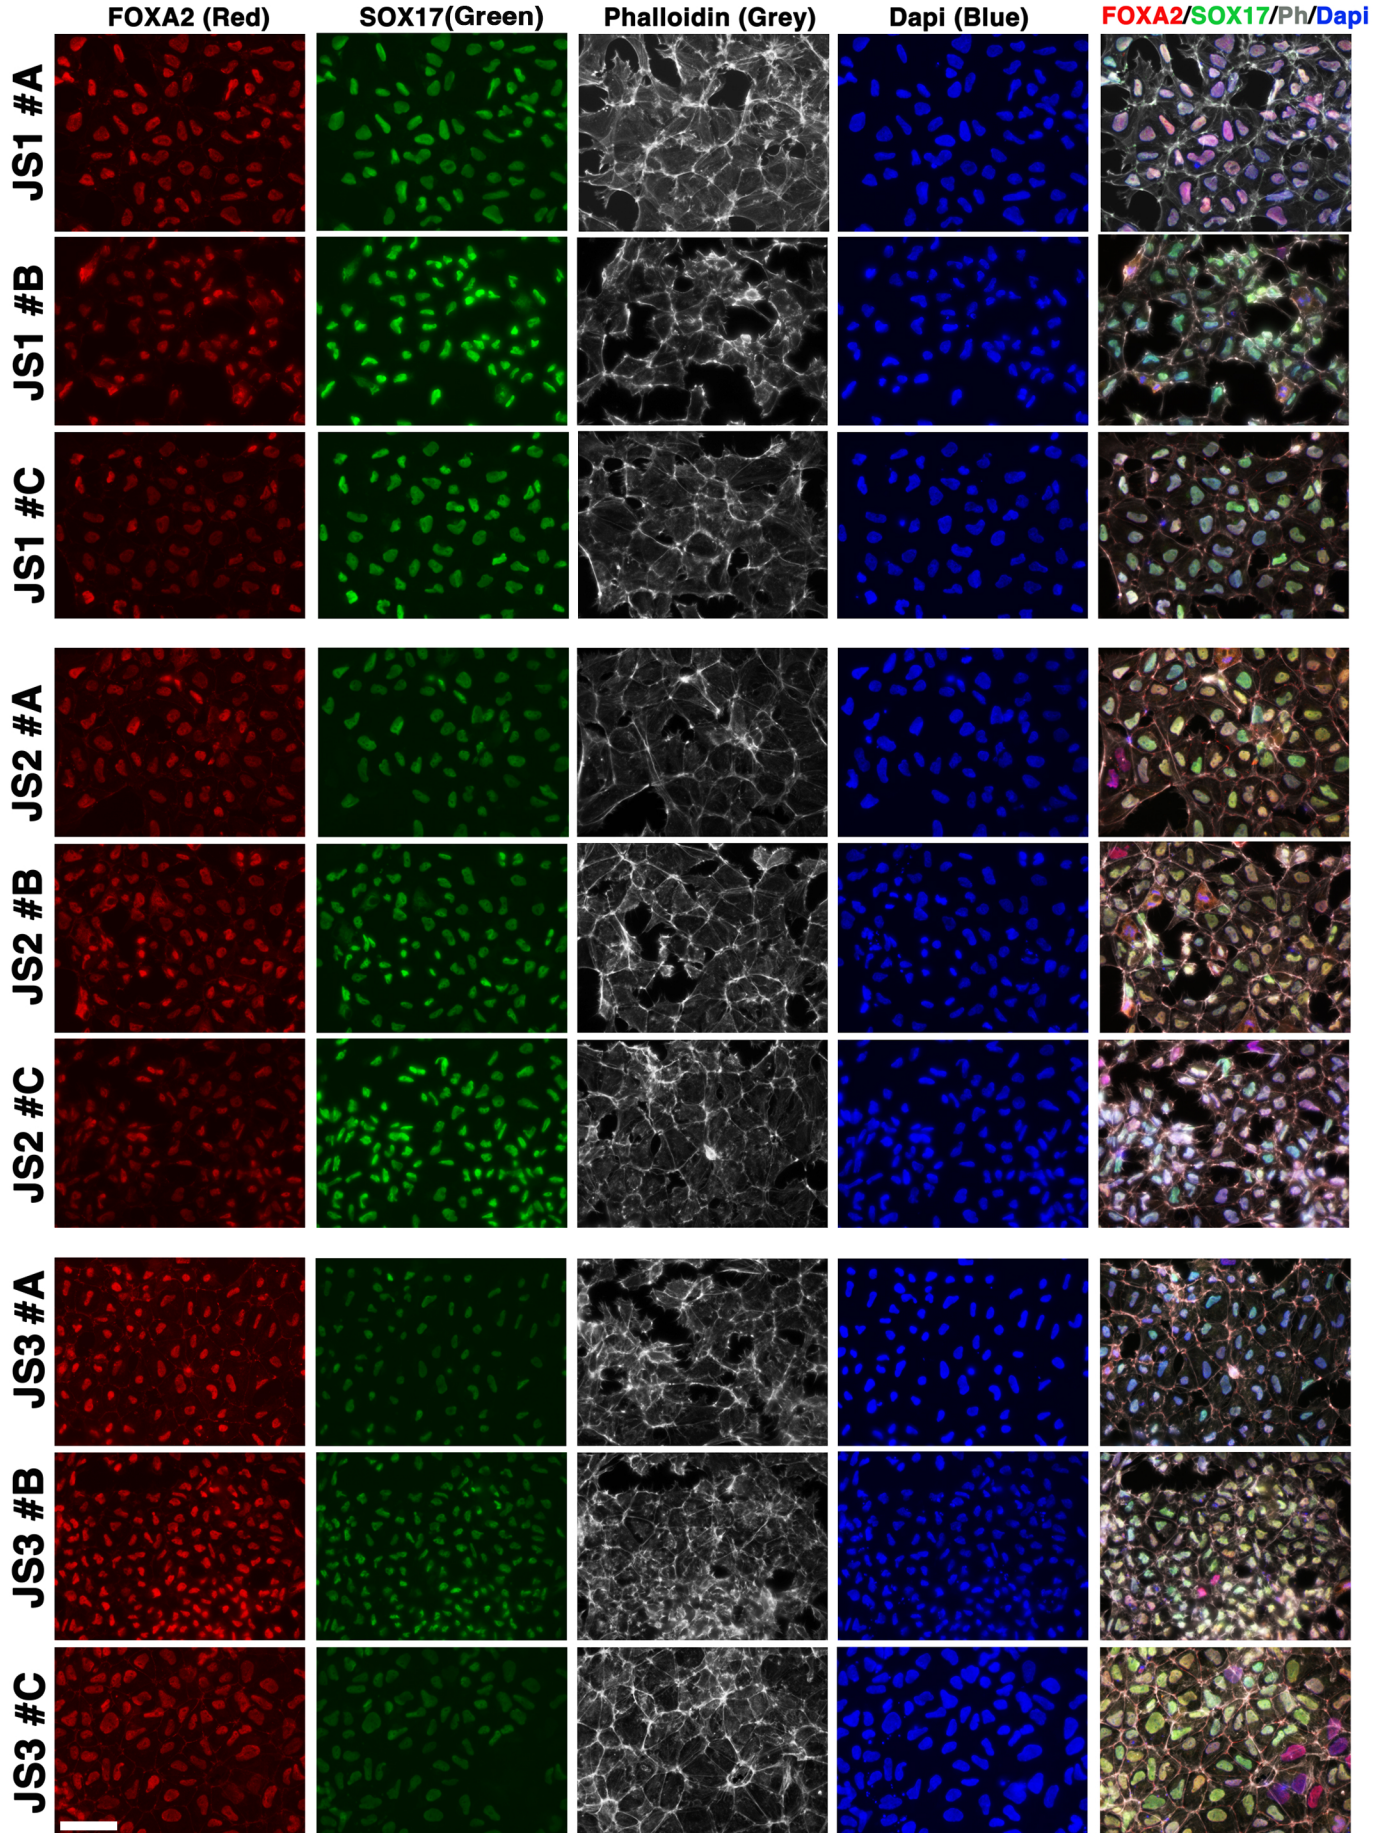

Supplemental\_Fig\_S5

**Supplemental Fig S5: Differentiation into endoderm derivatives.** Immunostaining of 47,XXX iPSCs differentiated into definitive endoderm to assess their differentiation potential. Cells have been labeled for FOXA2 (red), SOX17 (green), and Phalloidin (grey). Nuclei are counterstained with DAPI (Blue). Scale bar, 50  $\mu$ m.



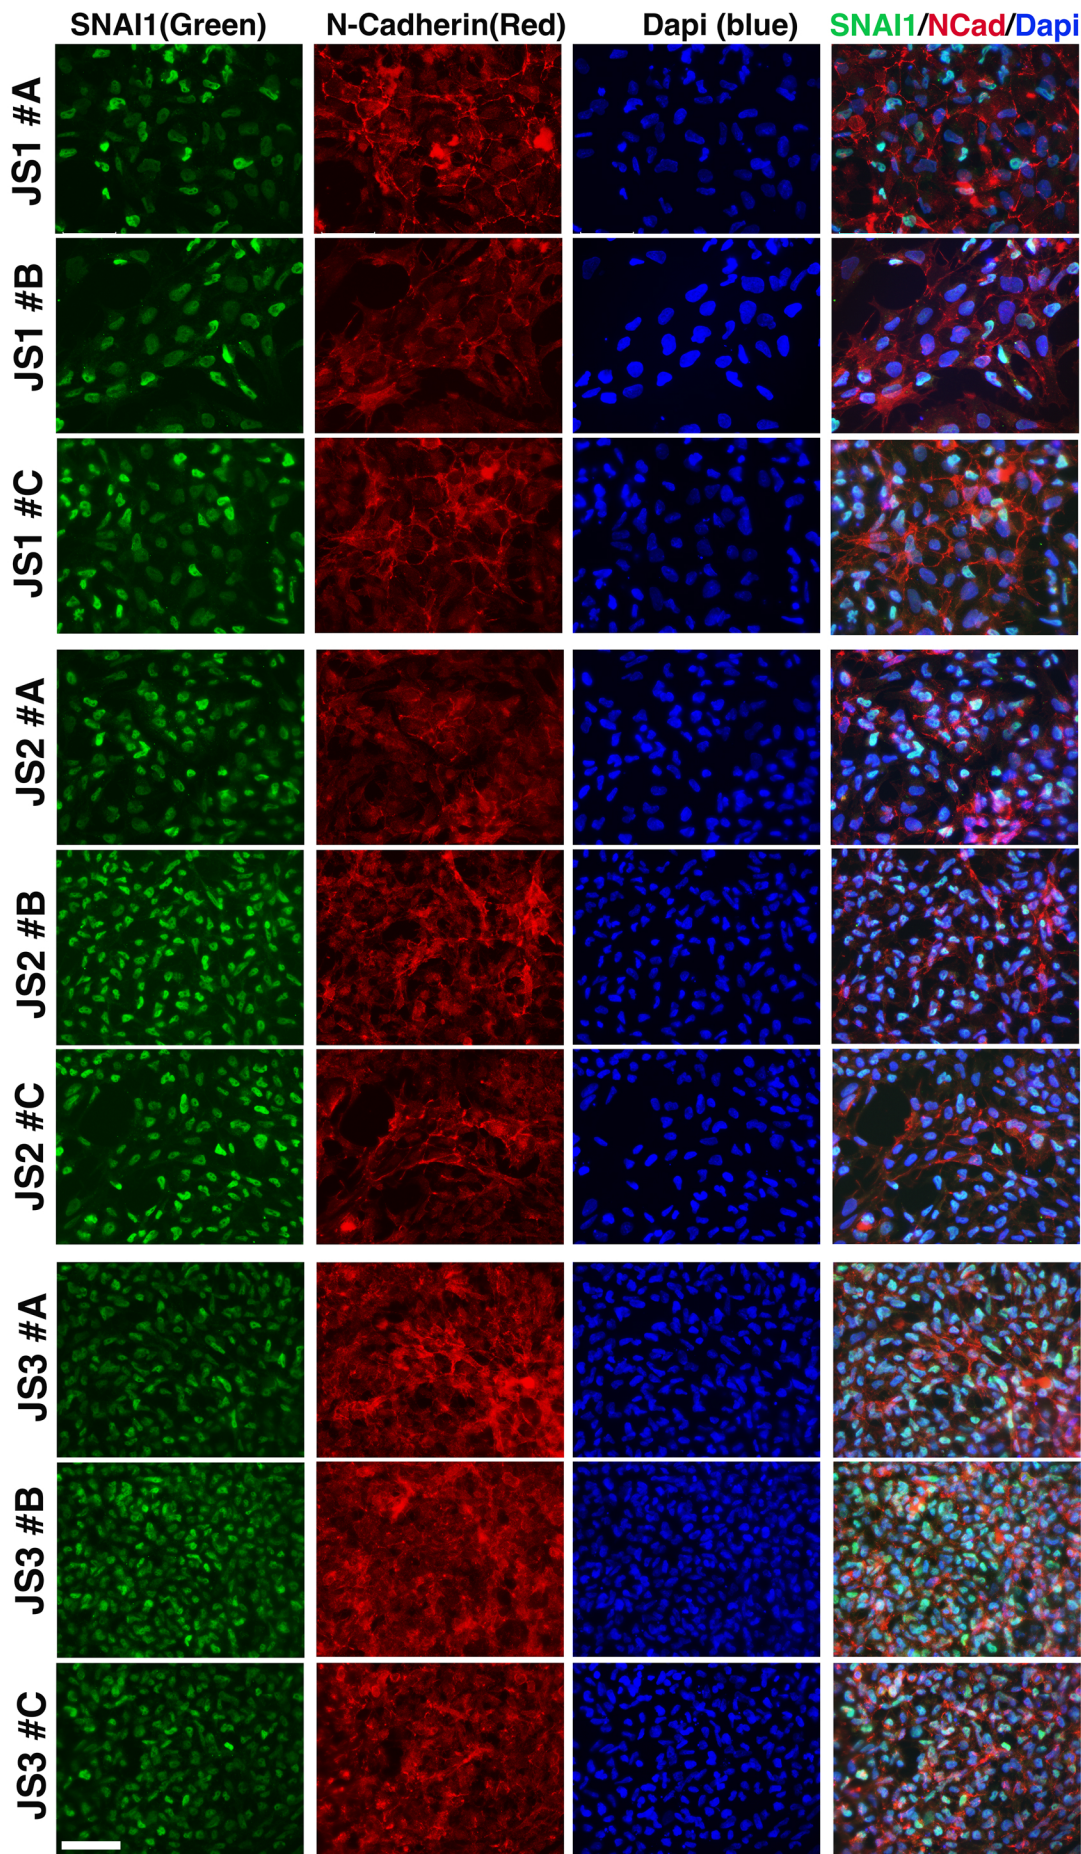

Supplemental\_Fig\_S6

**Supplemental Fig S6: Differentiation into Mesoderm lineage.** Immunostaining of 47,XYX iPSCs differentiated into cardiac mesoderm to assess their differentiation potential. Cells have been labeled for the mesodermal markers SNAI1 (green), N-Cadherin (red), and DAPI (Blue). Scale bar, 50  $\mu$ m.

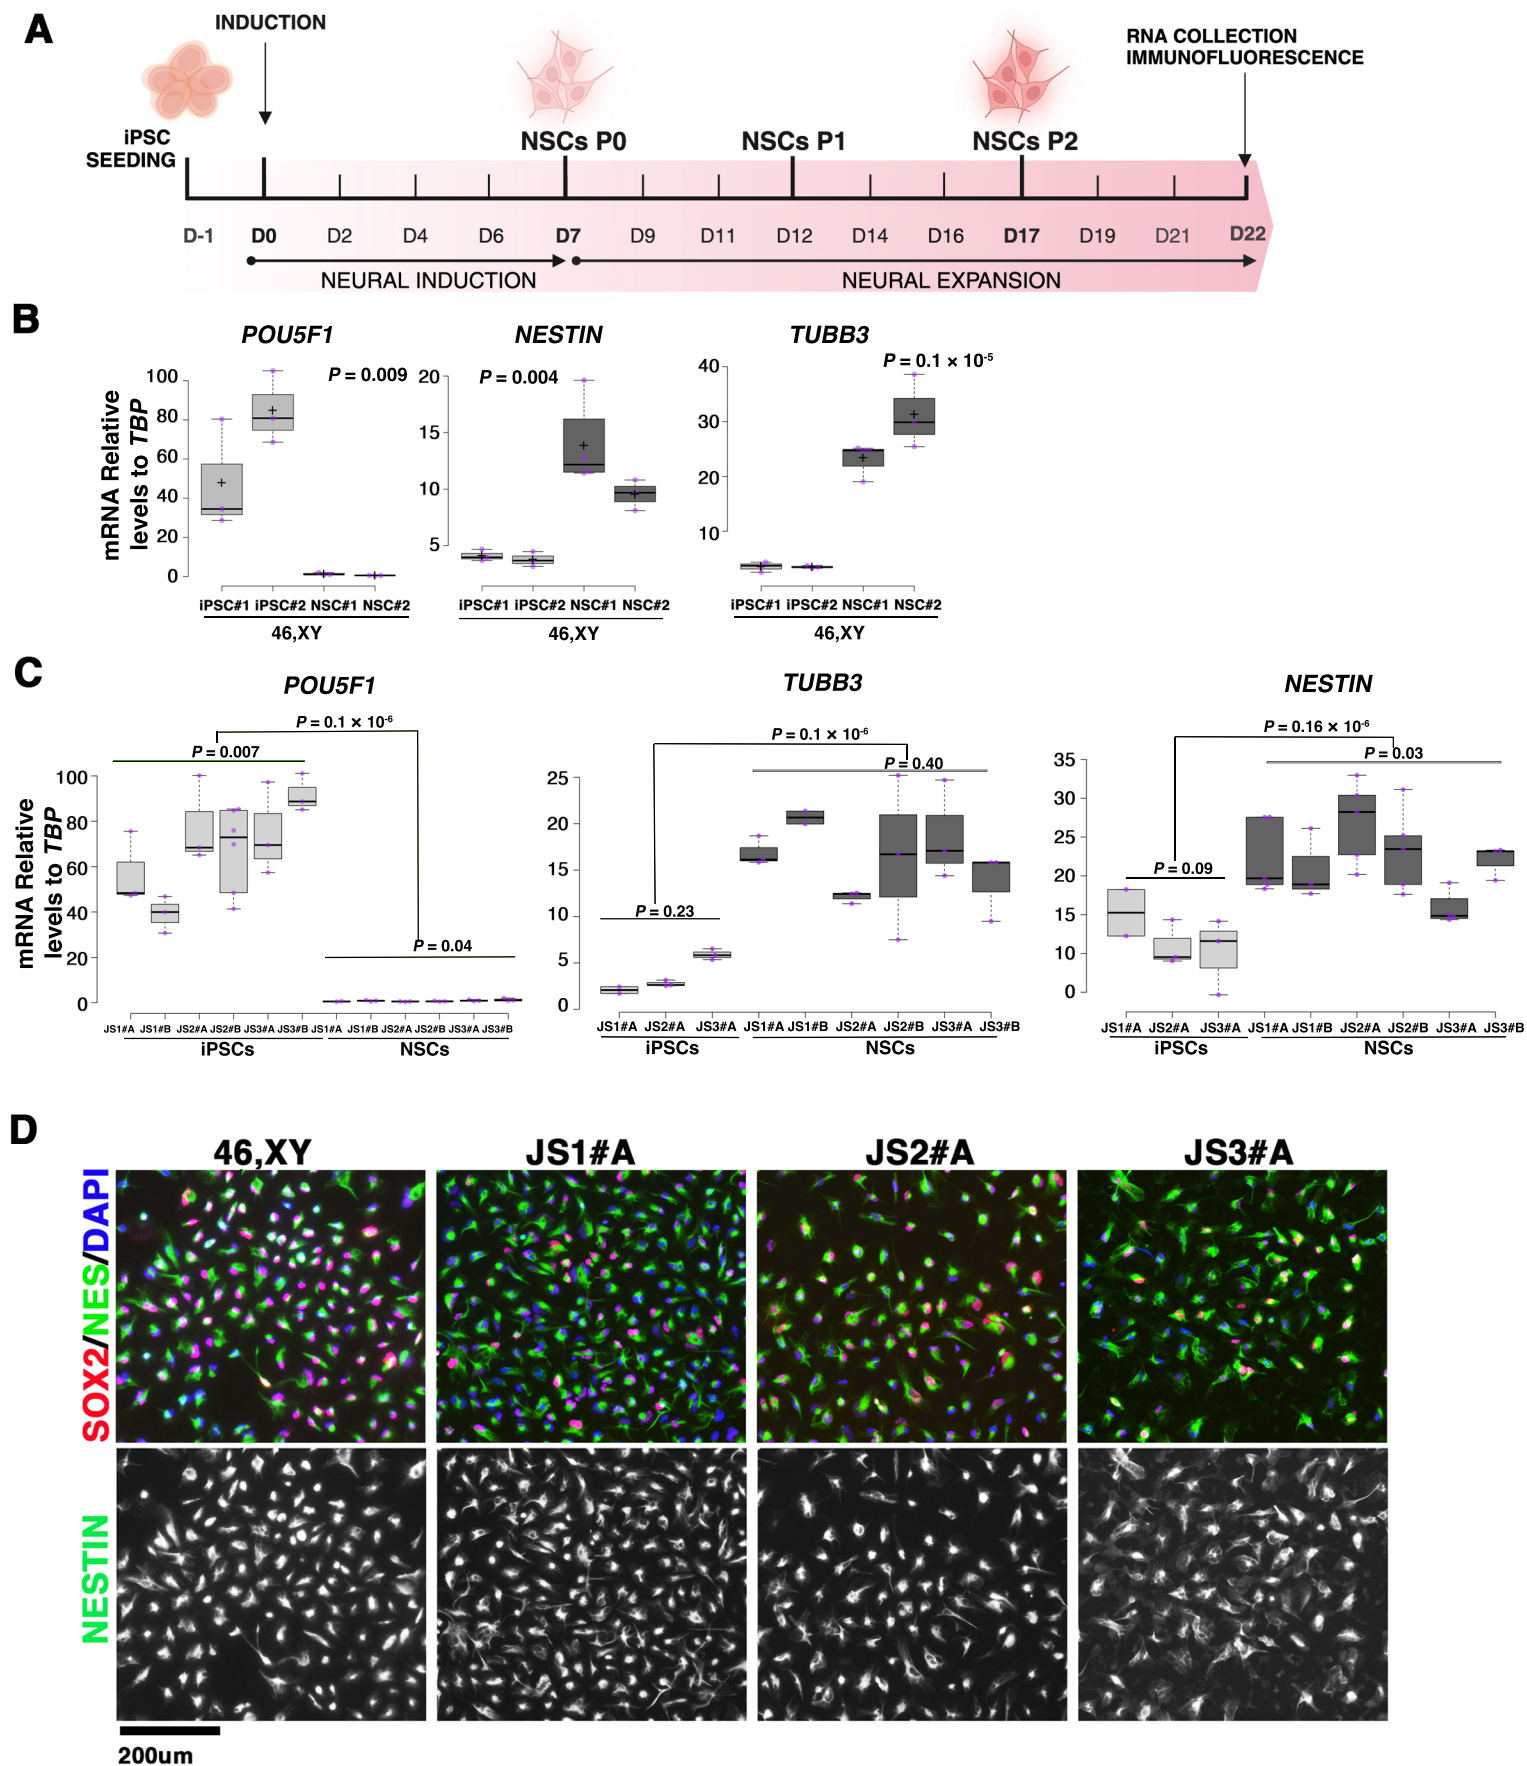

Supplemental\_Fig\_S7

**Supplemental Fig S7: Derivation of neural stem cells from 47,XYY and 46,XY iPSCs.**

**A)** Timeline of iPSCs differentiation into NSCs. At approximately 20-22 days of differentiation, NSCs reached passage 2 (P2) and were collected for RNA profiling or Immunofluorescence. **B-C)** Taqman assay showing the mRNA expression of the pluripotency marker *POU5F1*, and NSC markers *NESTIN* (*NES*) and *TUBULIN3* (*TUBB3*) in 46,XY (B) or 47,XYY cells (C). Values are normalized to the internal control TATA-binding protein (*TBP*). Each Purple dot represents an independent qPCR sample. One-way ANOVA and post-hoc Tukey HSD analyses were used to test the significance between groups. *P* values are shown. **D)** 47,XYY NSCs stained for the indicated markers. Images have been acquired using an EVOS™ FL Auto 2 Imaging System equipped with a 0.3NA/10X oil immersion objective (Olympus). Scale bars, 200 μm. See **Supplemental Table S11** for antibody information.



**A****Fibroblasts**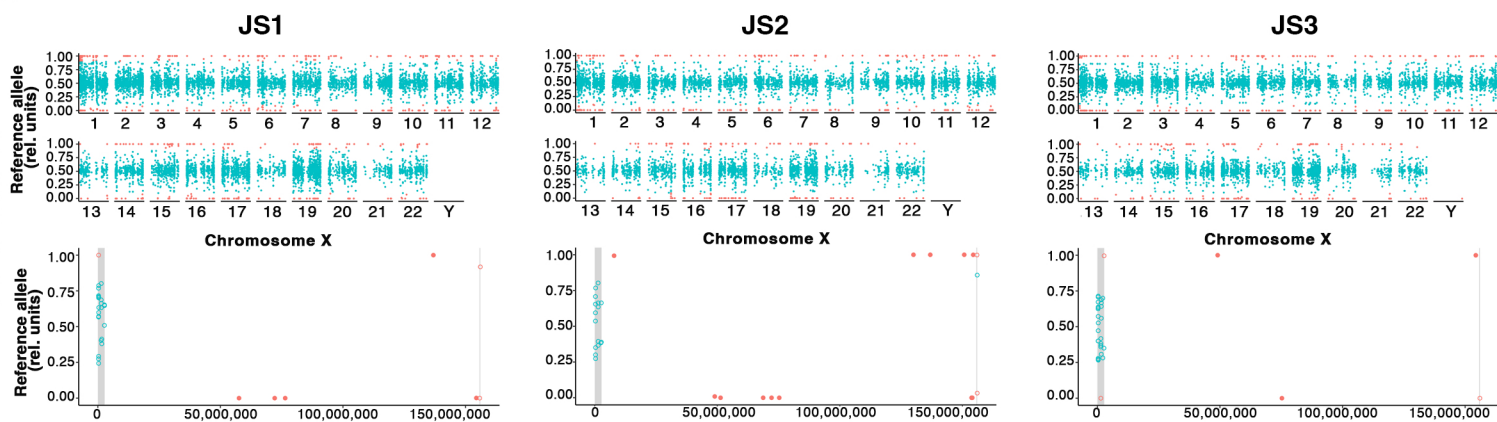**B****iPSCs**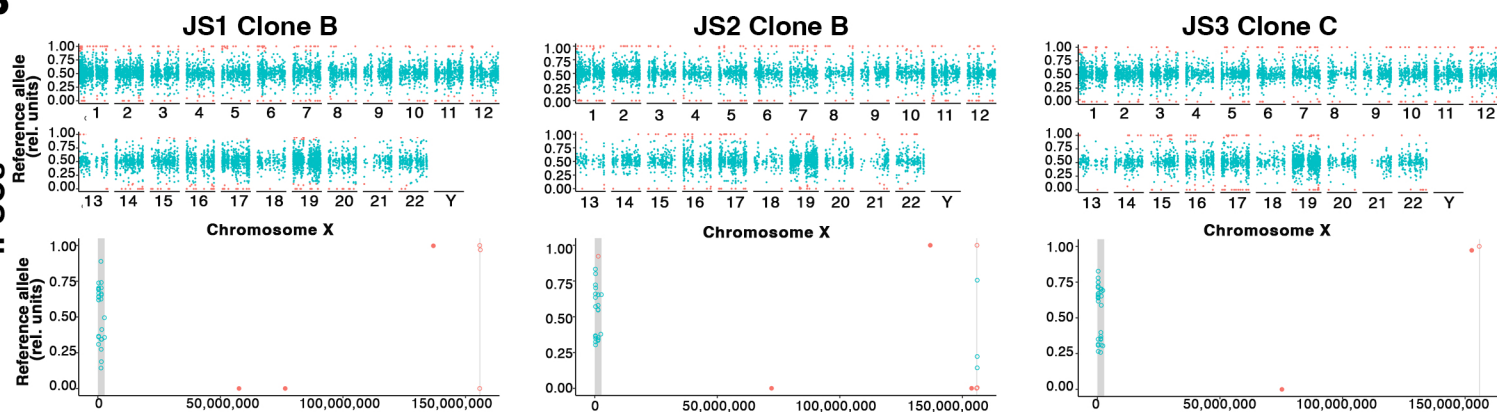**C****NSCs**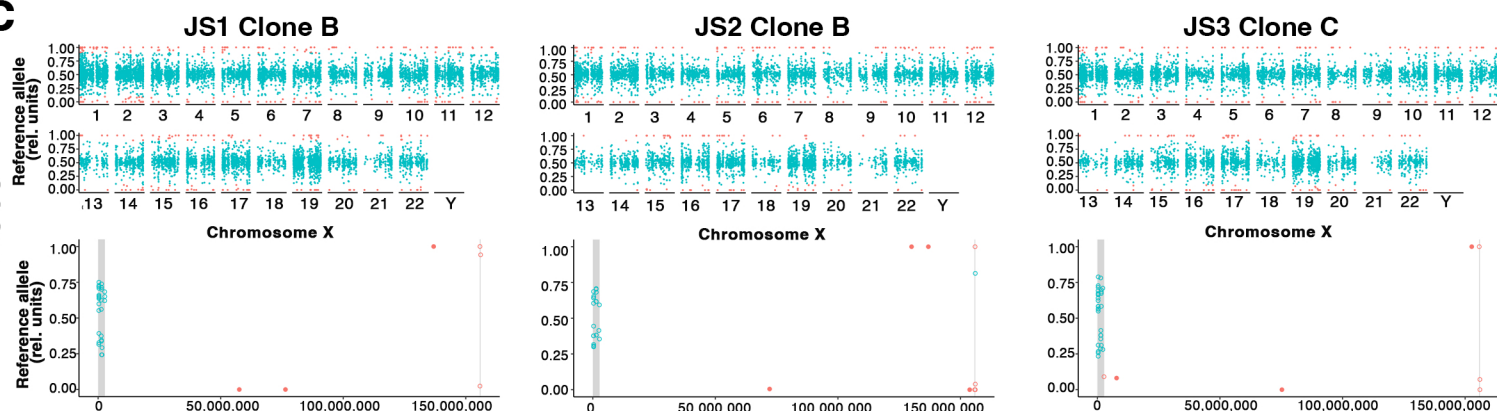**Supplemental\_Fig\_S8**

**Supplemental Fig S8: Allele-specific expression (ASE) analysis shows the biallelic expression of SNPs at the PAR region in 47,XYY cells.** Scatter plot profiles of coupled WES analysis and allele-specific RNA-seq analysis performed on autosomal (upper panel) and X Chromosomes (lower panel) showing the mono- (orange dots) or biallelic (light blue dots) gene expression status in 47,XYY iPSCs. Gray rectangles indicate PAR1 and PAR2 regions, respectively. Solid dots indicate non-PAR genes; open dots show PAR genes.

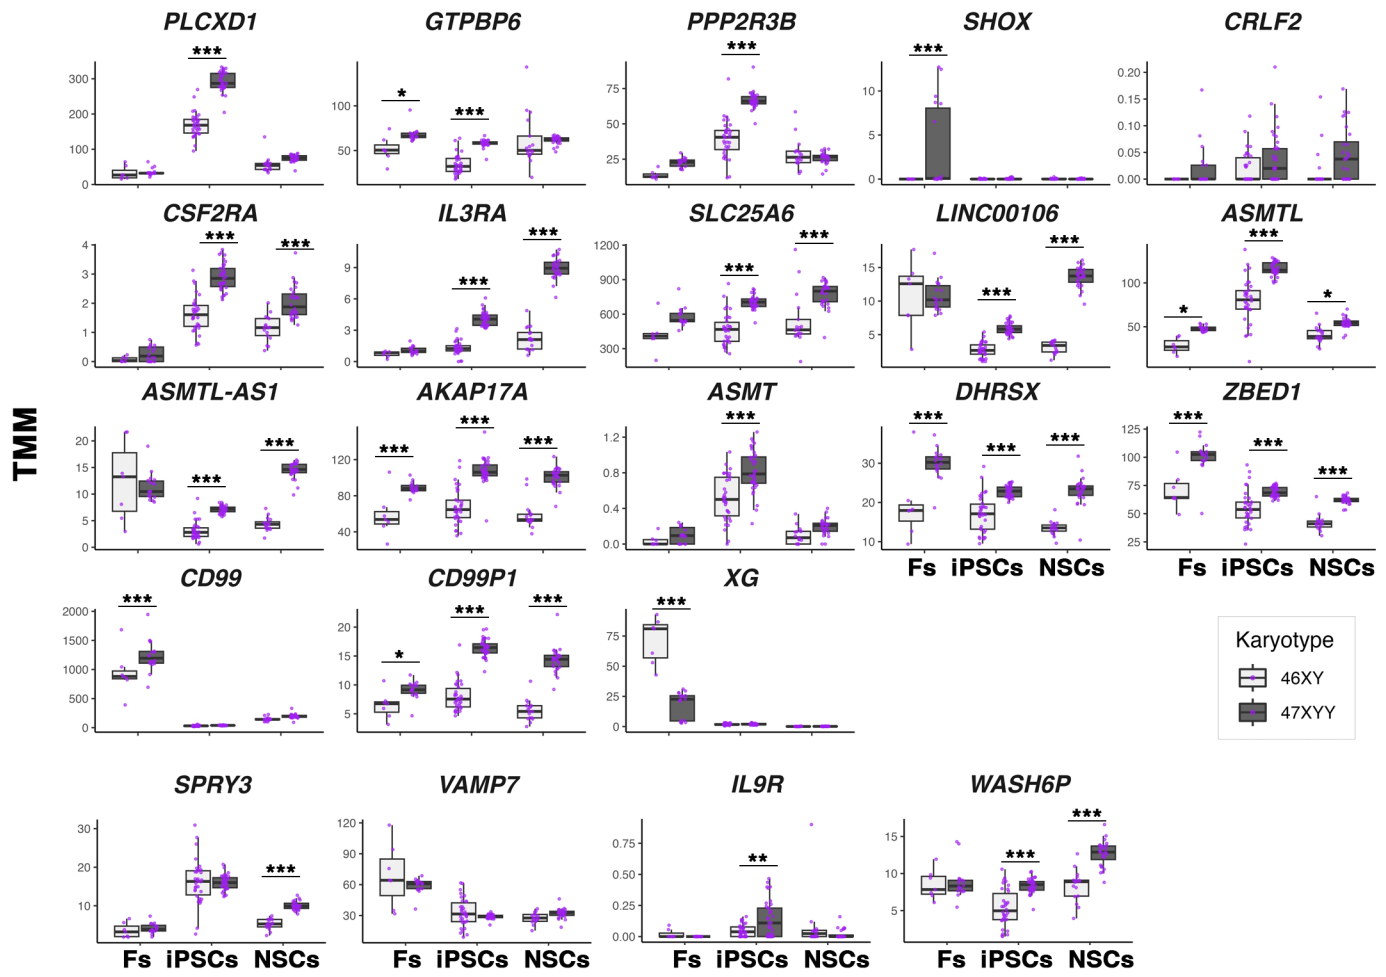

**Supplemental\_Fig\_S9**

**Supplemental Fig S9: Signature of cell-type specific PAR expression.** Box Plot of normalized TMM expression of PAR genes in control 46,XY and 47,XYY Fibroblasts, iPSCs, and NSCs. Each purple dot represents an independent RNA sample. Two-way ANOVA and post-hoc Tukey HSD analyses were used to test the significance of the groups and karyotypes. \**P* value < 0.05; \*\**P* value < 0.01; \*\*\**P* value < 0.001.



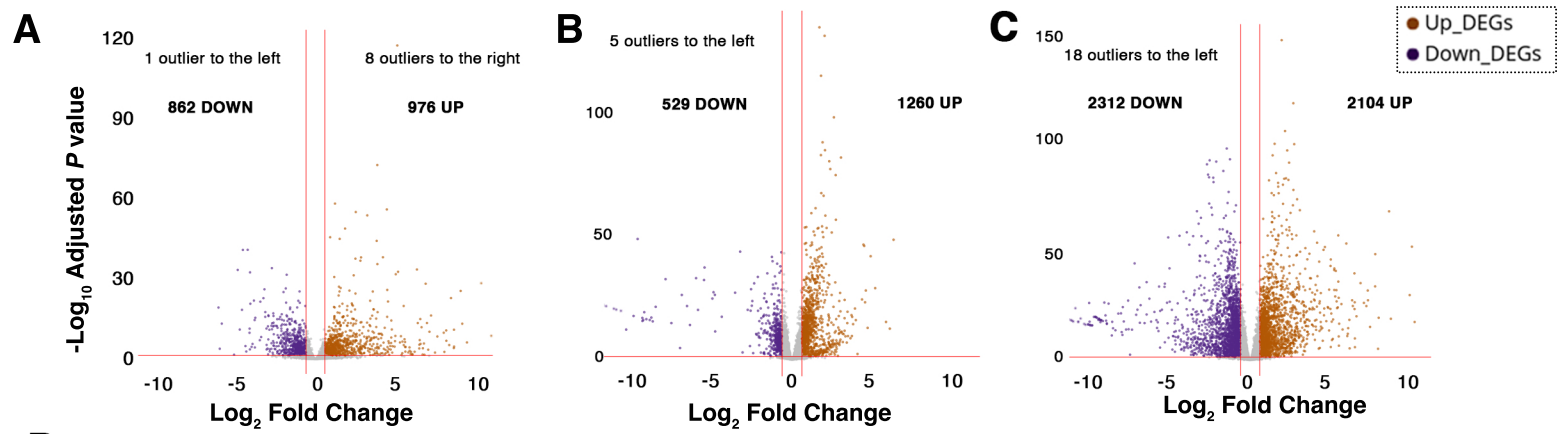

**D**

|                               | 47,XYY Vs. 46,XY (N.DEGs) |       |      |
|-------------------------------|---------------------------|-------|------|
|                               | Fibroblasts               | iPSCs | NSCs |
| <b>Autosomes</b>              | 1769                      | 1696  | 4229 |
| <b>Sex Chromosomes</b>        | 69                        | 89    | 181  |
| <b>X Chromosome (non-PAR)</b> | 50                        | 62    | 162  |
| <b>YChromosome (non-PAR)</b>  | 14                        | 15    | 12   |
| <b>X and Y PAR genes</b>      | 5                         | 12    | 7    |

Supplemental\_Fig\_S10

**Supplemental Fig S10: Genome-wide effects of Y Chromosome aneuploidy. A-C)**

Volcano plots effect size and significance of DEGs detected in 47,XYY versus 46,XY (A) Fibroblasts, (B) iPSCs, and (C) NSCs. The numbers of up and down-regulated DEGs are shown for each contrast. **D)** Summary of the autosomal, PAR, and non-PAR X and Y DEGs detected in the three cell types.  $FDR < 0.05$  and  $Log_2FC > |0.58|$ .

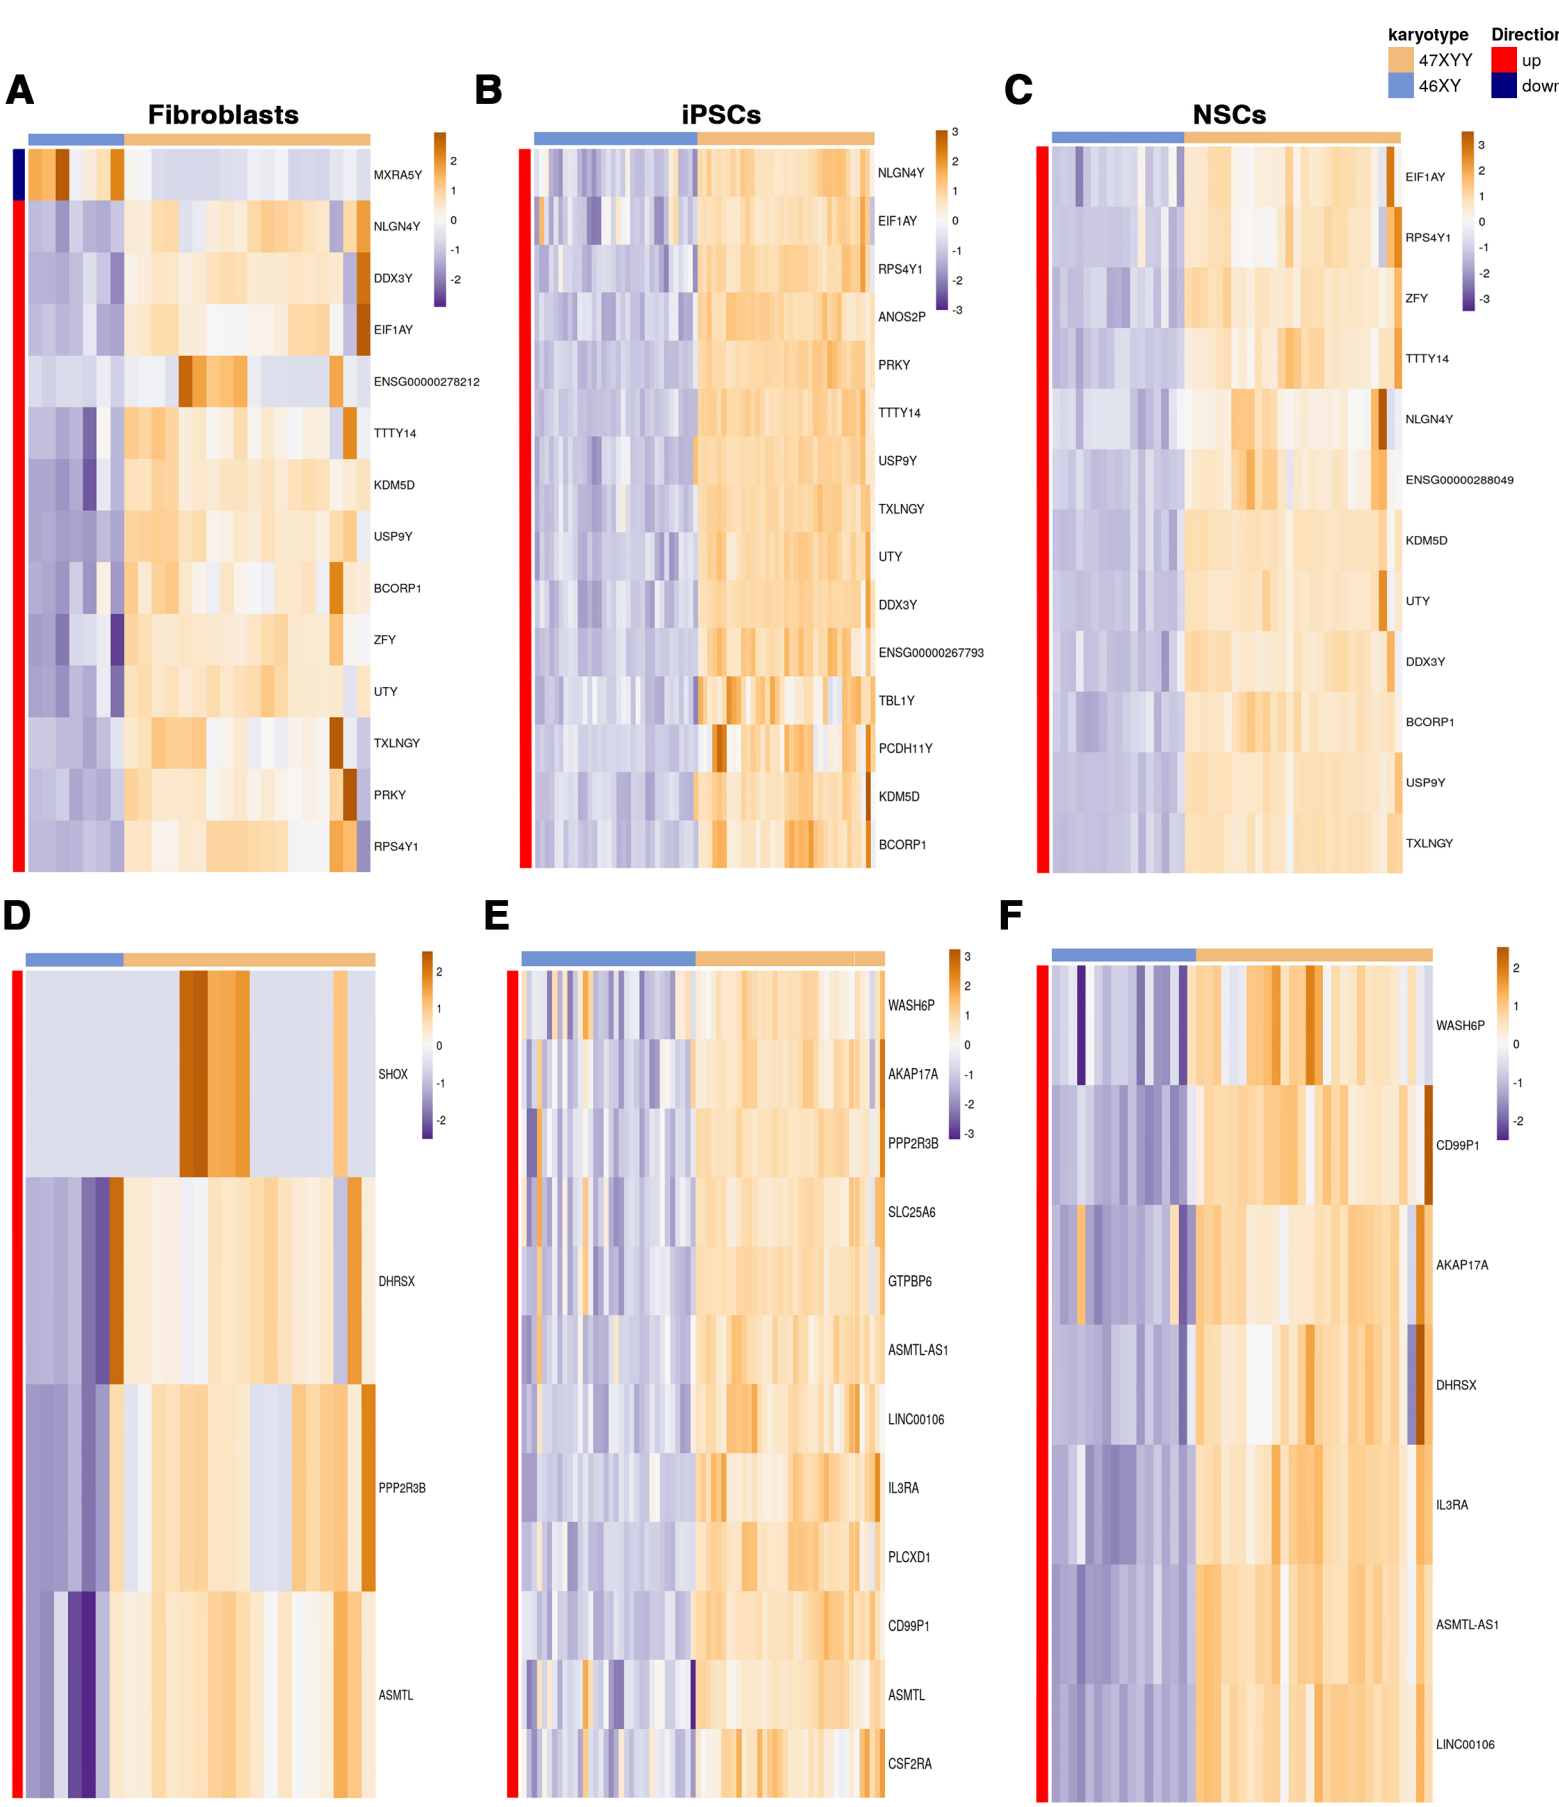

Supplemental\_Fig\_S11

**Supplemental Fig S11: Overdosage of PAR and NPY genes in Y Chromosome aneuploid cells. A-C)** Heatmap showing the TMM expression of upregulated NPY DEGs in 47,XYY vs. 46,XY contrast in (A) Fibroblasts, (B) iPSCs, and (C) NSCs. **D-F)** Heatmap showing the TMM expression of upregulated PAR DEGs in (D) Fibroblasts, (E) iPSCs, and (F) NSCs. TMM, Trimmed Mean of M-values.

karyotype Direction  
 47,XXX down  
 46,XY up

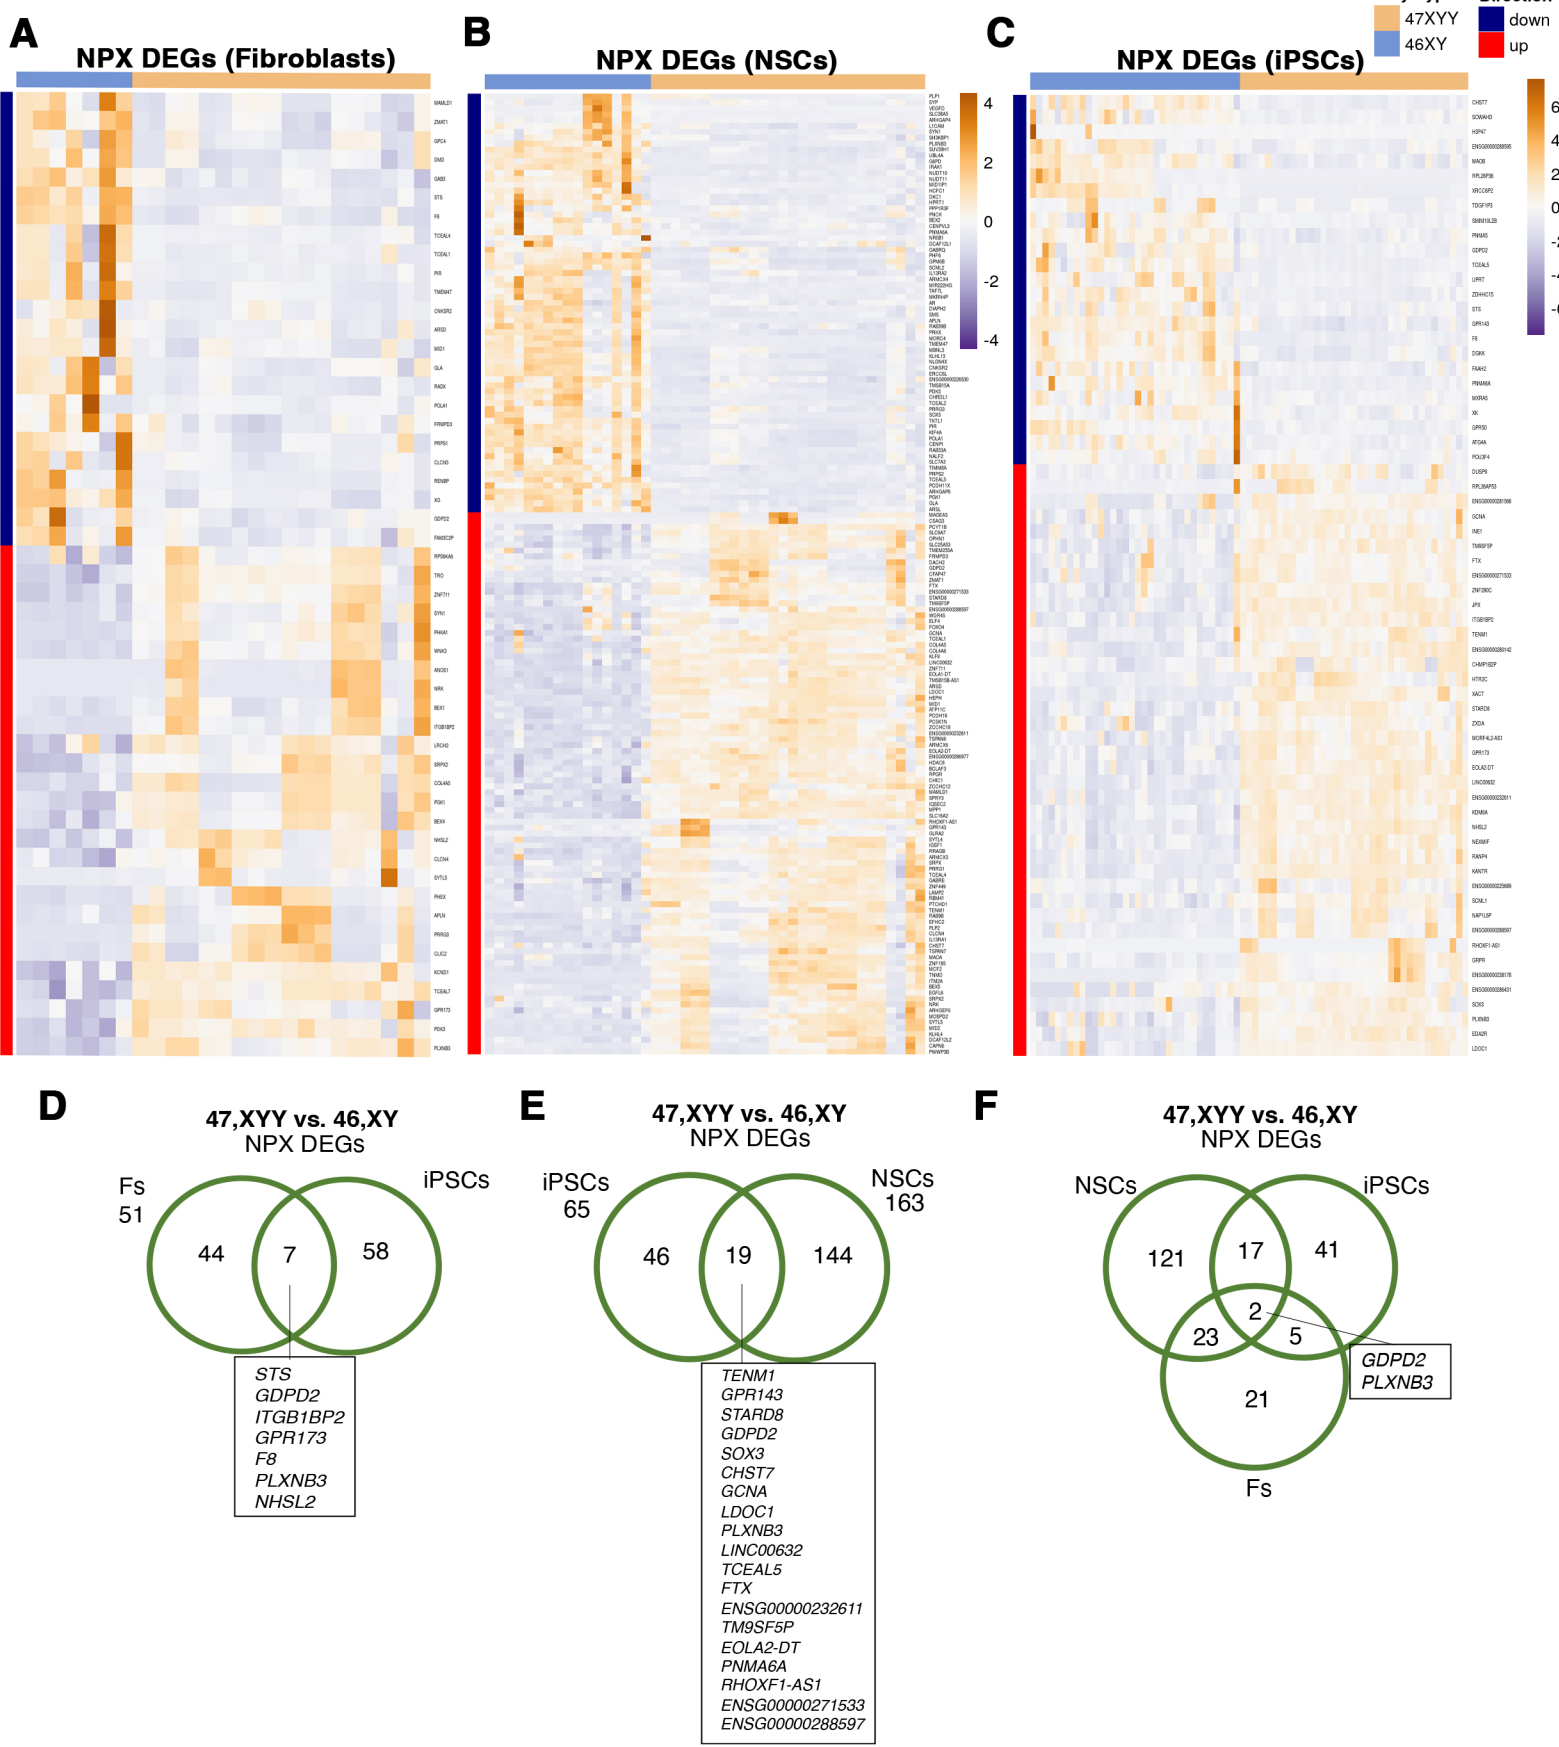

Supplemental\_Fig\_S12

**Supplemental Fig S12: Y-linked gene overexpression modulates X Chromosome expression. A-C)** Heatmap showing the TMM expression of up- and downregulated NPX DEGs in 47,XY (A) Fibroblasts, (B) NSCs, and (C) iPSCs. **D-F)** Venn diagrams of shared NPX DEGs in (D) fibroblasts and iPSCs, (E) iPSCs and NSCs, or (F) the three cell types. The number of NPX genes is shown in each diagram.

**A**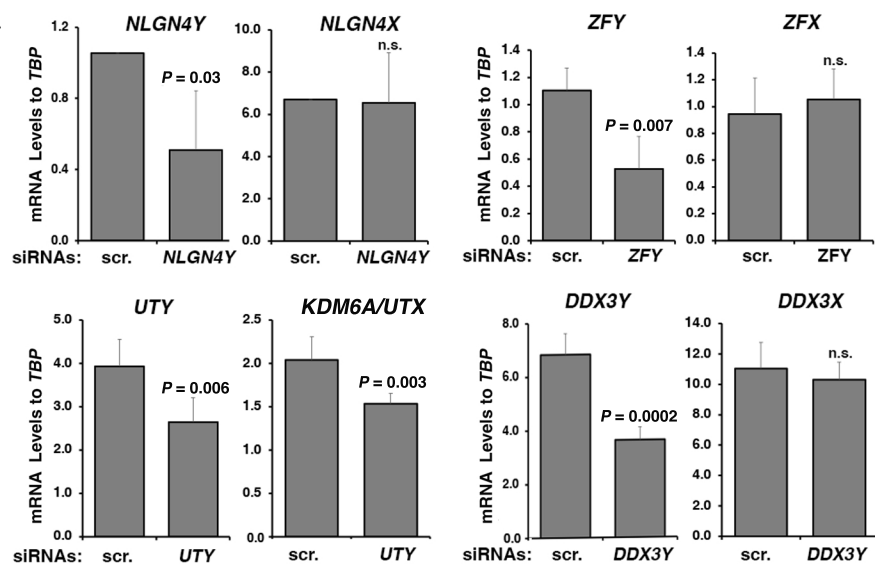**B**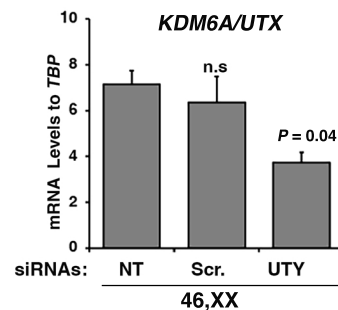**Supplemental \_Fig\_S13**

**Supplemental Fig S13: siRNA perturbation experiments on selected NPY genes. A)**

47,XXX iPSCs have been transfected with siRNA against *ZFY*, *DDX3Y*, *NLGN4Y*, and *UTY*. Taqman assays are used to analyze the expression of the indicated mRNAs in control cells transfected with either siRNA scramble (scr.) or siRNAs specific to the indicated targets. Bars represent the average  $\pm$  std of four independent experiments on iPSC clones derived from the three patients. **B)** The siRNA against *UTY* tested in 46,XX iPSCs has shown unspecific targeting of *KDM6A*. Bars represent the average  $\pm$  std of two independent experiments. Student's *t*-test, one-tailed distribution, two-sample unequal variance. *P* values are indicated.



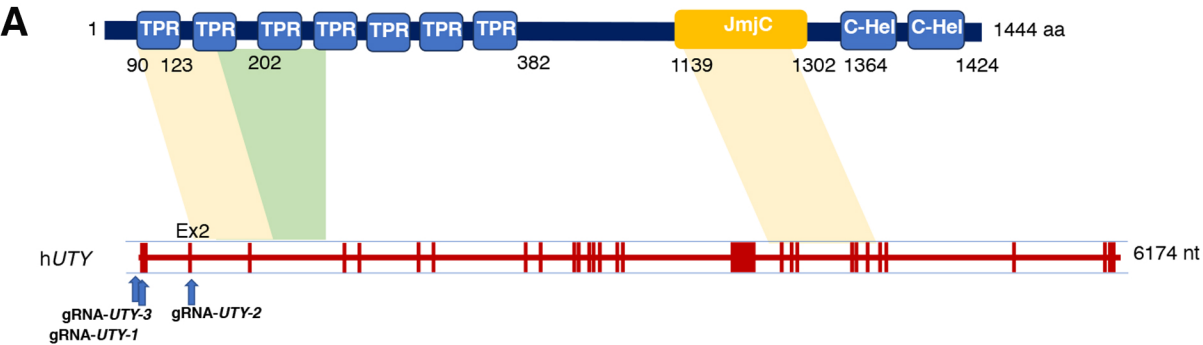

**B**

| gRNA Name  | Gene Symbol | Sequence 5'-3'        | PAM | Strand | hUTY Genomic Location | On Target Score | Off Target Score | Overall Score | In vitro Tested Indel % |
|------------|-------------|-----------------------|-----|--------|-----------------------|-----------------|------------------|---------------|-------------------------|
| gRNA UTY-1 | UTY         | GTCTGTTAGCCTGACAGTCG  | AGG | -      | 13479542..13479564    | 0.53            | 0.09             | 66.00         | 45%                     |
| gRNA UTY-2 | UTY         | GCCTCAGAACCCGAAGAGA   | CGG | +      | 13479295..13479317    | 0.94            | 0.19             | 66.00         | 57%                     |
| gRNA UTY-3 | UTY         | ATCACCGAAGGCCAACAGCGG | CGG | +      | 13479615..13479637    | 1.29            | 0.53             | 52.00         | 58%                     |

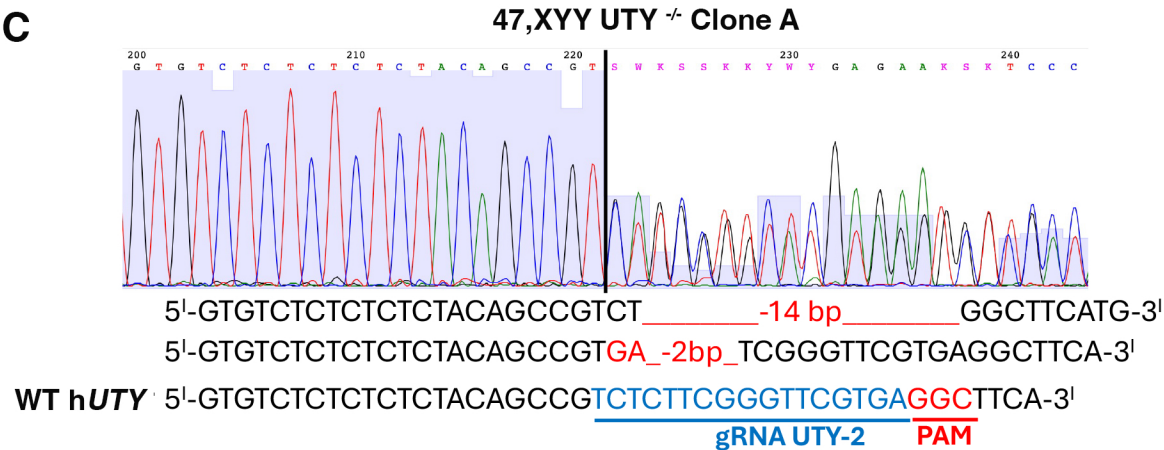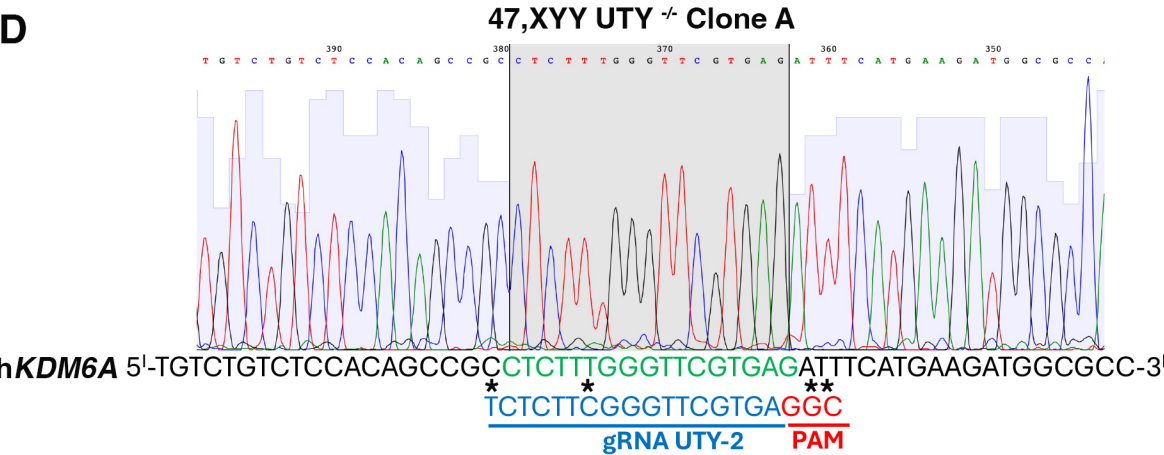

**Supplemental Fig S14: Generation of 47,XYU UTY Knock-out iPSCs. A)** Schematic of UTY protein (top) and gene (bottom). Tested guide RNAs (gRNAs) targeting *UTY* exon 1 and exon 2. TPR, tetratricopeptide repeat; JmjC, jumonji C domain; C-Hel, C-terminal helical domain **B)** gRNA targeting the human *UTY* sequence (NC\_000024.10:c13480670-13233895 hUTY). gRNA sequence, on target, off targets and Indel score are shown. **C)** Representative electropherogram of the *UTY* edited sequence in one 47,XYU UTY <sup>-/-</sup> iPSCs using gRNA UTY-2. **D)** The gRNA UTY-2 is not editing the *KDM6A* sequence. Electropherogram of *KDM6A* in a representative 47,XYU UTY <sup>-/-</sup> clone. Asterisks indicate mismatches between the gRNA targeting *UTY* and *KDM6A* exon 2.



**Supplemental Fig S15: Generation of 47,XYY UTY Knock-out iPSCs.**

**A-C)** Electropherograms of three independent JS-iPSC clones edited for *UTY* using gRNA UTY-2 to generate 47,XYY UTY<sup>-/-</sup> iPSCs.



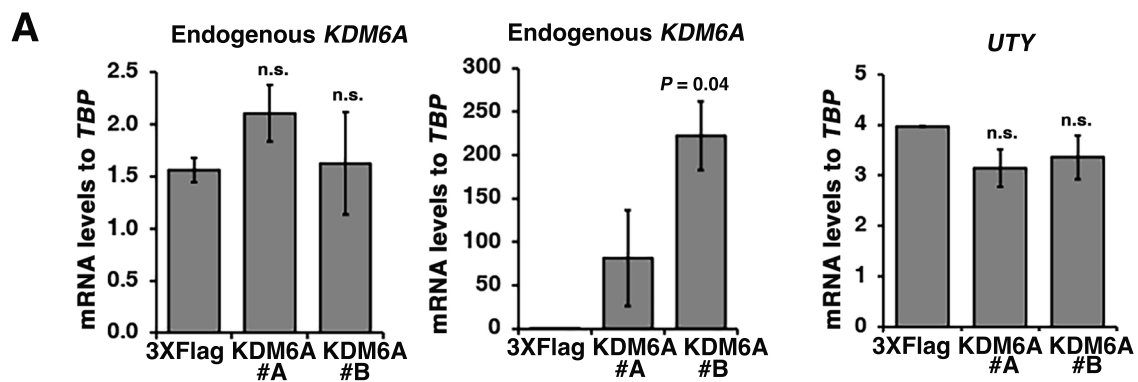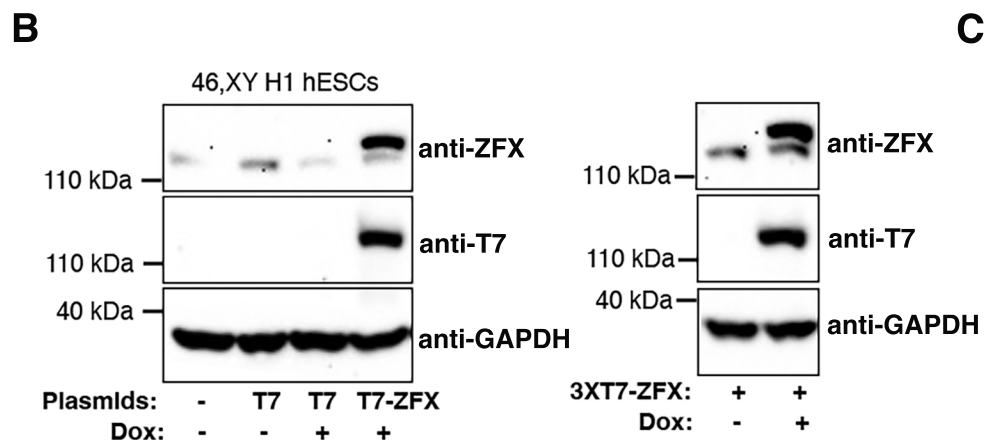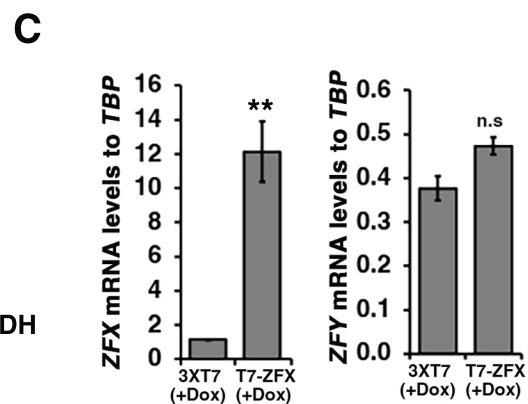

**Supplemental Fig S16: Overexpression of NPX-NPY gene pairs in H1 46,XY hESCs.**

**A)** Taqman assay for endogenous *KDM6A* (left), exogenous gene expression by Real-time qPCR (middle), and mRNA levels of *UTY* in 46,XY hESCs stably integrating either empty 3X-Flag (control) or 3X-Flag-KDM6A vectors. Two independent hESC clones (KDM6A#A and KDM6A#B) have been tested. Bars are the average  $\pm$  std of three independent experiments. Student's *t*-test, two-tailed distribution, two-sample unequal variance. *P* values are indicated. The significance is set at *P* value < 0.05. **B)** Left: Protein levels of ZFX in non-transfected, 3XT7 empty (T7) or 3XT7-ZFX inducible 46,XY H1 hESCs. Right: Inducible overexpression of ZFX protein in hESCs H1 treated for 48 hrs with 50 ng/ml Doxycycline (+Dox) or not treated (-Dox). **C)** Taqman assay assessing *ZFX* and *ZFY* expression levels in Doxycycline (+Dox) hESCs transfected with 3XT7 empty (T7) or 3XT7-ZFX plasmids. n.s = not significant. \*\**P* value < 0.005

A

B

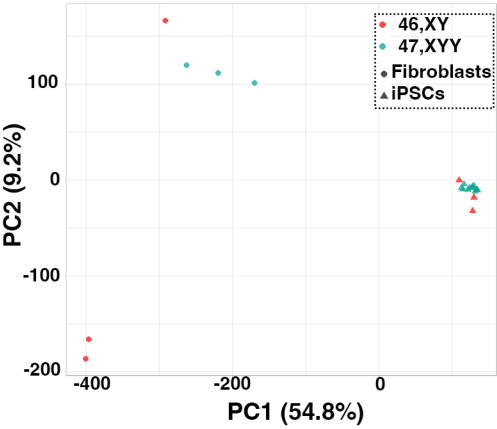

| Cell type   | Gene Location | Hyper_total | Hypo_total |
|-------------|---------------|-------------|------------|
| Fibroblasts | Autosome      | 3384        | 691        |
| Fibroblasts | X Chromosome  | 93          | 21         |
| Fibroblasts | Y Chromosome  | 8           | 0          |
| iPSCs       | Autosome      | 28          | 31         |
| iPSCs       | X Chromosome  | 2           | 0          |
| iPSCs       | Y Chromosome  | 0           | 2          |

Supplemental\_Fig\_S17

**Supplemental Fig S17: Methylation analysis in 47,XY Y A)** PCA of methylation sites in fibroblasts and iPSCs on the whole genome and **B)** Number, location, and direction of DMRs in fibroblasts and iPSCs.

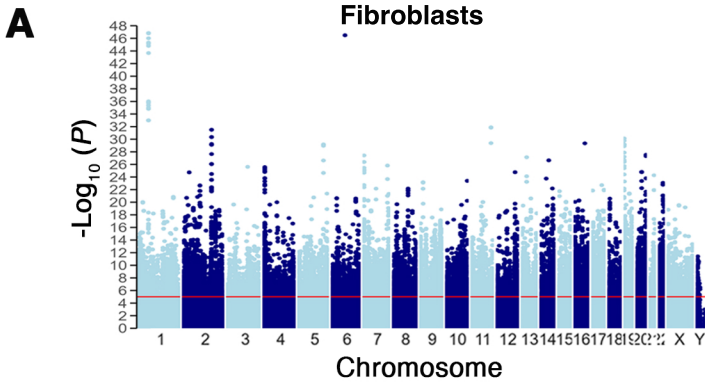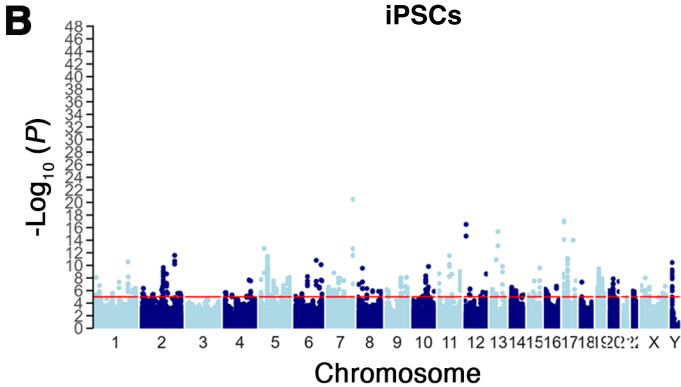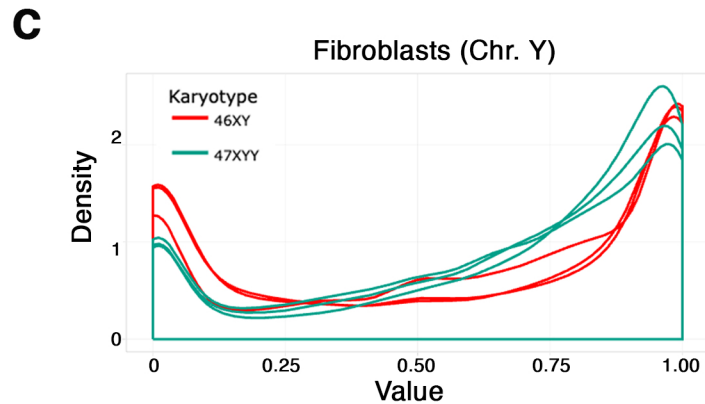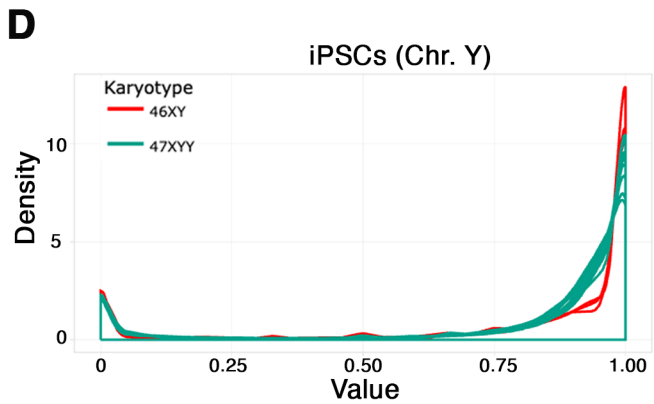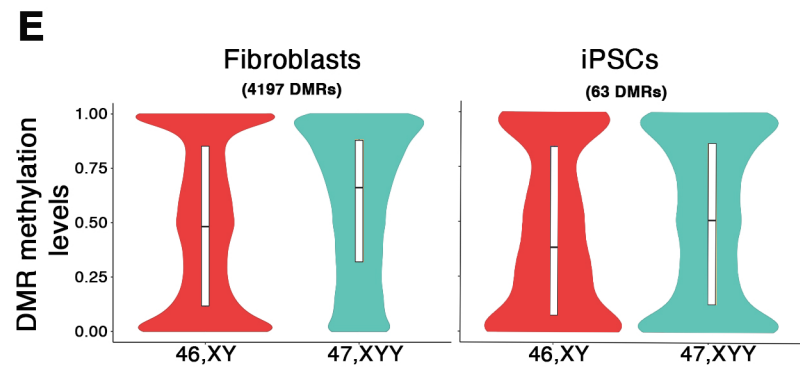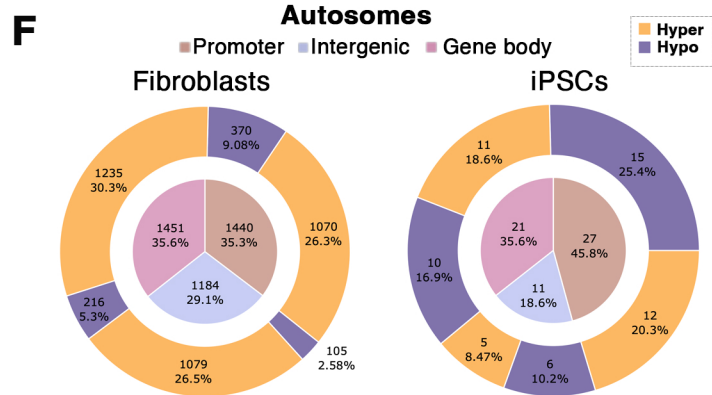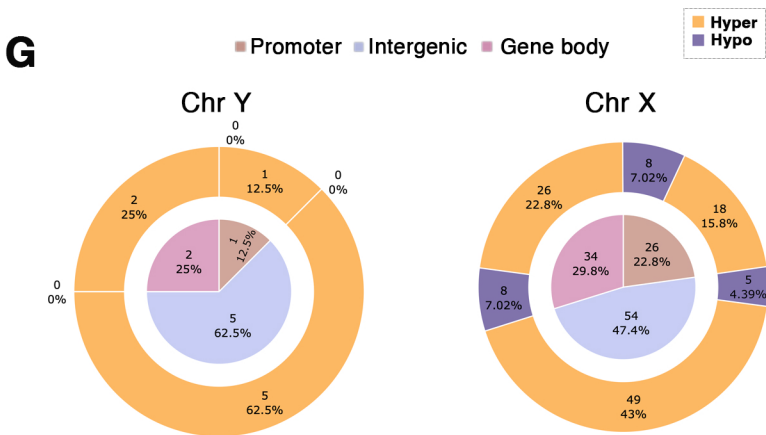

Supplemental\_Fig\_S18

**Supplemental Fig S18: DNA Methylation profile of 47,XYY and 46,XY in fibroblasts and iPSCs.** **A-B)** Manhattan Plots showing the differential methylation in CpG sites between 47,XYY and 46,XY in A) fibroblasts and B) iPSCs (above the red line,  $P$  value  $< 1 \times 10^{-5}$ ). Each point represents a single CpG site, y-axis shows negative  $\log_{10}$  of associated  $P$  values. **C-D)** Density plots of the CpG methylation ratios in Y Chromosome in 47,XYY vs. 46,XY in fibroblasts (C) and (D) iPSCs. **E)** Violin distribution plot in DMR methylation levels in 47XYY vs. 46XY fibroblasts and iPSCs. The X-axis represents the comparison karyotype, and the Y-axis represents the methylation level value. The inner Box plot represents the ends of the first and third quartile, and the central slash represents the median. **F)** Nested pie chart of the distribution of autosomal DMRs in Fibroblast (left) and iPSCs (right). **G)** Nested pie chart of the distribution of DMRs in Y (left) and X (right) Chromosomes in fibroblasts. The Inner pie represents the proportion of DMR located in the gene promoter (brown), gene body (pink), and intergenic regions (blue). The Outer donut represents the proportion of the DMRs in the inner pie categories that are hypermethylated (orange) or hypomethylated (blue).



**A**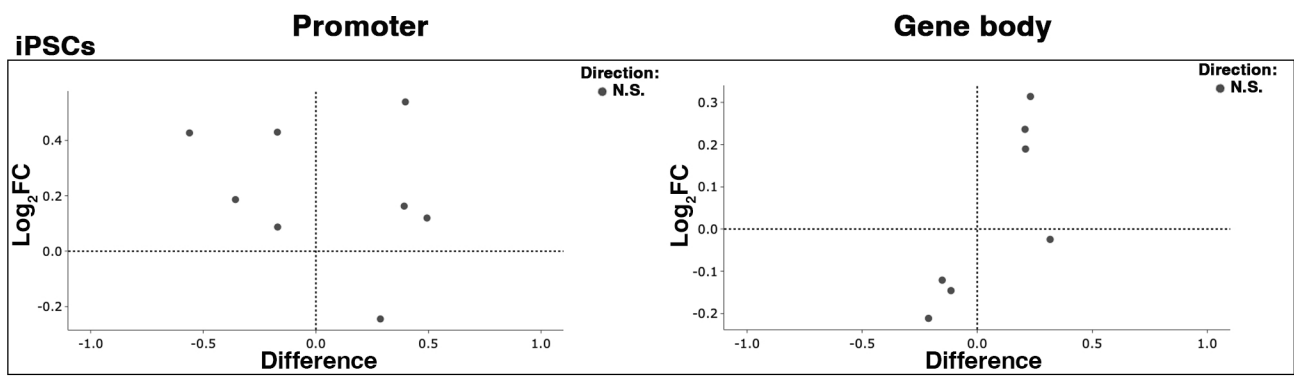**B**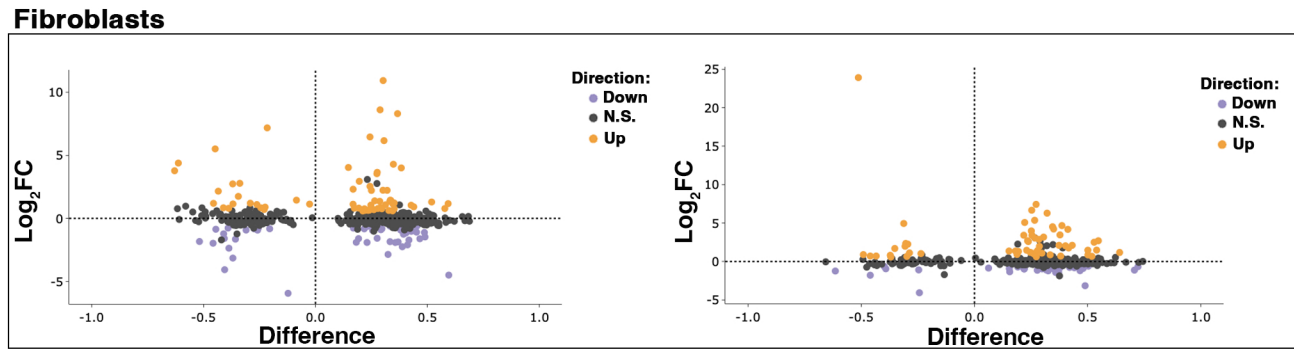**Supplemental\_Fig\_S19**

**Supplemental Fig S19: Methylation status of genes differentially expressed in fibroblasts and iPSCs.** Scatter plot showing the correlation of the average methylation over DMRs located in the promoter and gene body with the gene expression (DESeq2 normalized data) in **A)** iPSCs and **B)** fibroblasts. Each dot represents a gene. Only genes with a coefficient of determination  $R^2 > |0.2|$  are shown. For genes containing more than 1 DMR in a specific region (promoter/gene body) the average methylation between the multiple DMRs was calculated.

**A**

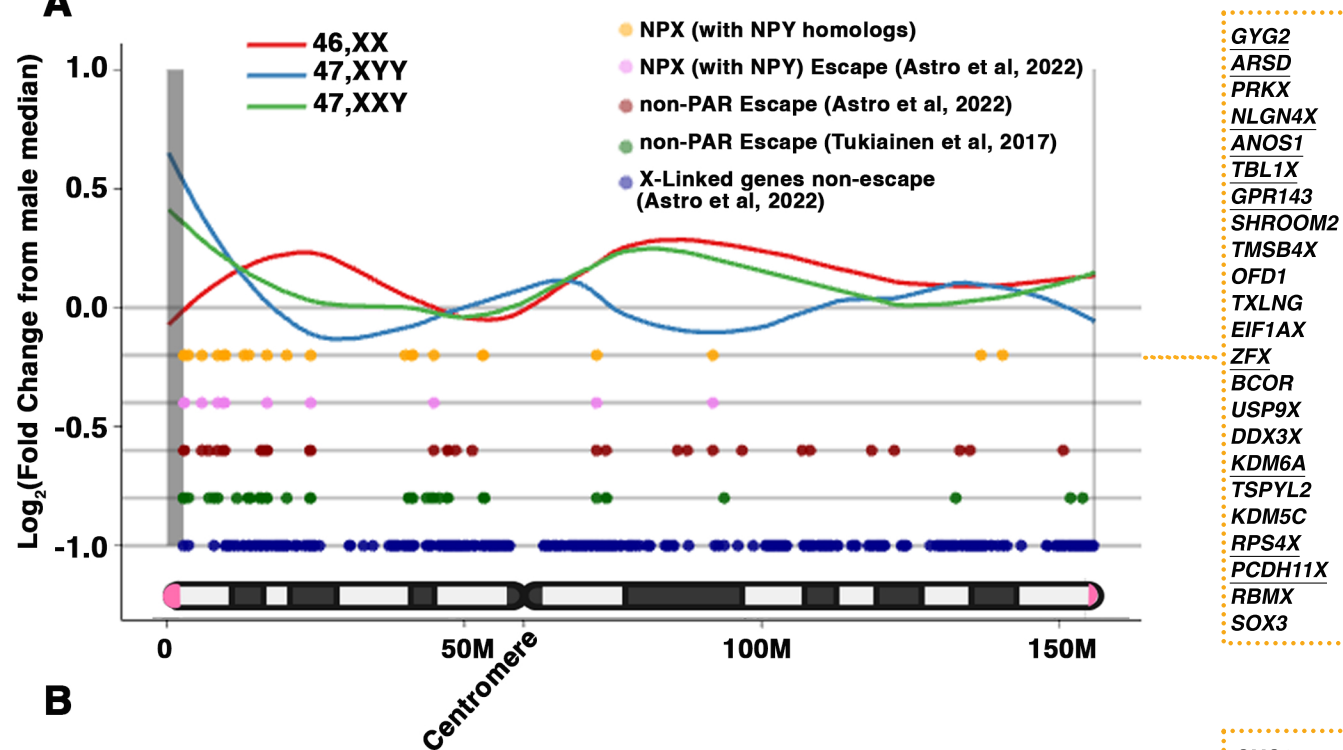

**B**

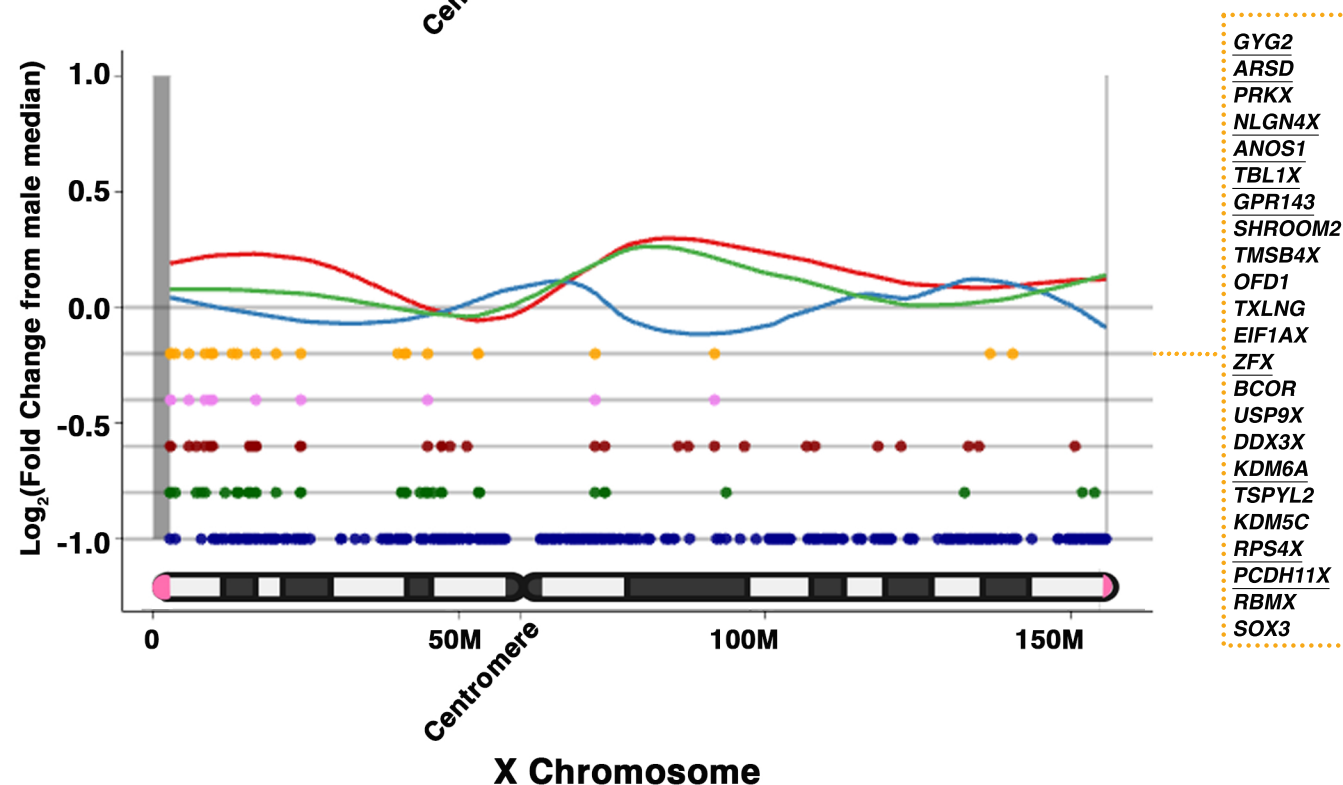

### **Supplemental Fig S20: Moving expression average plot along the X Chromosome**

**A-B)** Moving average line plot (loess fit, span 0.45) along the X Chromosome showing the Log<sub>2</sub> fold change from control 46,XY iPSCs. Gray vertical boxes indicate PAR1 and PAR2 regions. The gray horizontal line represents no theoretical deviations from control 46,XY samples. In **B)**, PAR1 genes are masked. The location of four gene categories is displayed: NPX genes with a NPY homolog (yellow dots); NPX genes escaping X inactivation with a NPY homolog (Astro et al., 2022) (pink dots); non-PAR escape genes (Tukiainen et al., 2017) (green dots); non escape X-linked genes (Astro et al., 2022) (blue dots). NPX genes with NPY homologs expressed in iPSCs are listed on the right. NPX genes escaping X inactivation are underlined.

A

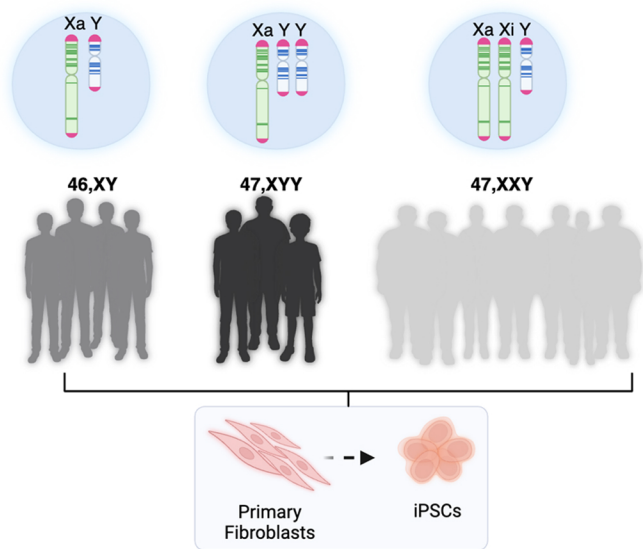

B

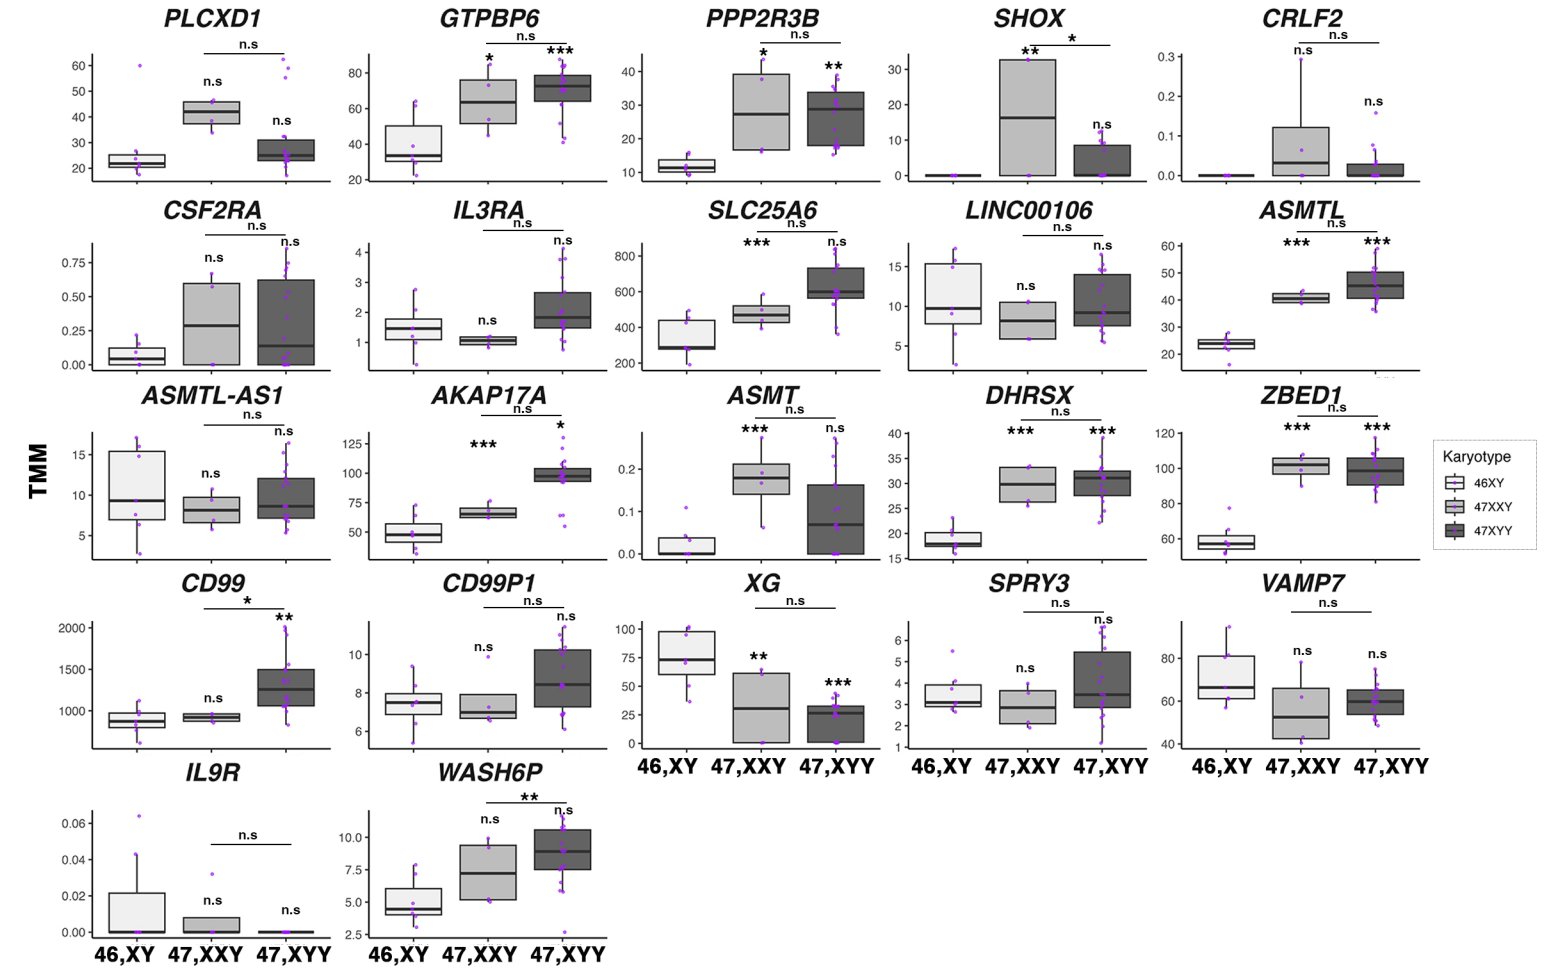

Supplemental\_Fig\_S21

**Supplemental Fig S21: PAR gene expression in 47,XYY, 47,XXY, and 46,XY fibroblasts. A)** Schematic of JS, KS, and control cohort of patients used in the study. **B)** Box plot of the TMM Normalized PAR gene expression in control 47,XYY, 47,XXY, and 46,XY fibroblasts. Each Purple dot represents an independent RNA sample. One-way ANOVA and post-hoc Tukey HSD analyses were used to test the significance between karyotypes. \**P* value < 0.05; \*\**P* value < 0.01; \*\*\**P* value < 0.001.
